# Supplementary material
Source: PubMed Central journal article supplement (PMC3371154)
Supplement: NIHMS366320-supplement-01.pdf [file NIHMS366320-supplement-01.pdf]

|         |     |     |                       |          |        |        |      |
|---------|-----|-----|-----------------------|----------|--------|--------|------|
| ATOM 43 | CB  | CB  | . TRP TRP TRP A A 6 6 | . 76.417 | 81.360 | 8.957  | 1.00 |
| 5.32    | 1   | . . |                       |          |        |        |      |
| ATOM 44 | CG  | CG  | . TRP TRP TRP A A 6 6 | . 77.264 | 81.354 | 7.651  | 1.00 |
| 6.28    | 1   | . . |                       |          |        |        |      |
| ATOM 45 | CD1 | CD1 | . TRP TRP TRP A A 6 6 | . 77.664 | 82.437 | 6.940  | 1.00 |
| 10.03   | 1   | . . |                       |          |        |        |      |
| ATOM 46 | NE1 | NE1 | . TRP TRP TRP A A 6 6 | . 78.437 | 82.069 | 5.896  | 1.00 |
| 7.70    | 1   | . . |                       |          |        |        |      |
| ATOM 47 | CE2 | CE2 | . TRP TRP TRP A A 6 6 | . 78.473 | 80.705 | 5.833  | 1.00 |
| 10.26   | 1   | . . |                       |          |        |        |      |
| ATOM 48 | CD2 | CD2 | . TRP TRP TRP A A 6 6 | . 77.782 | 80.222 | 6.956  | 1.00 |
| 6.70    | 1   | . . |                       |          |        |        |      |
| ATOM 49 | CE3 | CE3 | . TRP TRP TRP A A 6 6 | . 77.717 | 78.856 | 7.167  | 1.00 |
| 8.75    | 1   | . . |                       |          |        |        |      |
| ATOM 50 | CZ3 | CZ3 | . TRP TRP TRP A A 6 6 | . 78.331 | 78.003 | 6.252  | 1.00 |
| 9.15    | 1   | . . |                       |          |        |        |      |
| ATOM 51 | CH2 | CH2 | . TRP TRP TRP A A 6 6 | . 79.036 | 78.489 | 5.159  | 1.00 |
| 9.31    | 1   | . . |                       |          |        |        |      |
| ATOM 52 | CZ2 | CZ2 | . TRP TRP TRP A A 6 6 | . 79.144 | 79.842 | 4.930  | 1.00 |
| 8.84    | 1   | . . |                       |          |        |        |      |
| ATOM 53 | C   | C   | . TRP TRP TRP A A 6 6 | . 78.376 | 81.985 | 10.353 | 1.00 |
| 2.06    | 1   | . . |                       |          |        |        |      |
| ATOM 54 | O   | O   | . TRP TRP TRP A A 6 6 | . 78.053 | 83.144 | 10.629 | 1.00 |
| 3.15    | 1   | . . |                       |          |        |        |      |
| ATOM 55 | N   | N   | . ALA ALA ALA A A 7 7 | . 79.624 | 81.595 | 10.186 | 1.00 |
| 3.39    | 1   | . . |                       |          |        |        |      |
| ATOM 56 | CA  | CA  | . ALA ALA ALA A A 7 7 | . 80.815 | 82.423 | 10.350 | 1.00 |
| 2.42    | 1   | . . |                       |          |        |        |      |
| ATOM 57 | CB  | CB  | . ALA ALA ALA A A 7 7 | . 81.847 | 81.693 | 11.265 | 1.00 |
| 3.98    | 1   | . . |                       |          |        |        |      |
| ATOM 58 | C   | C   | . ALA ALA ALA A A 7 7 | . 81.385 | 82.804 | 8.983  | 1.00 |
| 2.40    | 1   | . . |                       |          |        |        |      |
| ATOM 59 | O   | O   | . ALA ALA ALA A A 7 7 | . 81.195 | 82.101 | 7.962  | 1.00 |
| 2.58    | 1   | . . |                       |          |        |        |      |
| ATOM 60 | N   | N   | . ARG ARG ARG A A 8 8 | . 82.034 | 83.971 | 8.954  | 1.00 |
| 2.17    | 1   | . . |                       |          |        |        |      |
| ATOM 61 | CA  | CA  | . ARG ARG ARG A A 8 8 | . 82.683 | 84.426 | 7.756  | 1.00 |
| 2.08    | 1   | . . |                       |          |        |        |      |
| ATOM 62 | CB  | CB  | . ARG ARG ARG A A 8 8 | . 81.723 | 85.325 | 6.983  | 1.00 |
| 2.00    | 1   | . . |                       |          |        |        |      |
| ATOM 63 | CG  | CG  | . ARG ARG ARG A A 8 8 | . 81.493 | 86.724 | 7.637  | 1.00 |
| 3.79    | 1   | . . |                       |          |        |        |      |
| ATOM 64 | CD  | CD  | . ARG ARG ARG A A 8 8 | . 80.531 | 87.693 | 6.878  | 1.00 |
| 2.44    | 1   | . . |                       |          |        |        |      |
| ATOM 65 | NE  | NE  | . ARG ARG ARG A A 8 8 | . 79.240 | 87.016 | 6.662  | 1.00 |
| 2.46    | 1   | . . |                       |          |        |        |      |
| ATOM 66 | CZ  | CZ  | . ARG ARG ARG A A 8 8 | . 78.269 | 86.976 | 7.538  | 1.00 |
| 2.30    | 1   | . . |                       |          |        |        |      |
| ATOM 67 | NH1 | NH1 | . ARG ARG ARG A A 8 8 | . 78.413 | 87.611 | 8.707  | 1.00 |
| 4.11    | 1   | . . |                       |          |        |        |      |
| ATOM 68 | NH2 | NH2 | . ARG ARG ARG A A 8 8 | . 77.170 | 86.257 | 7.286  | 1.00 |
| 3.81    | 1   | . . |                       |          |        |        |      |
| ATOM 69 | C   | C   | . ARG ARG ARG A A 8 8 | . 83.957 | 85.173 | 8.110  | 1.00 |
| 2.56    | 1   | . . |                       |          |        |        |      |

|         |     |       |                         |                             |
|---------|-----|-------|-------------------------|-----------------------------|
| ATOM 70 | O   | O     | . ARG ARG ARG A A 8 8   | . 84.163 85.570 9.260 1.00  |
| 2.16    | 1   | . . . |                         |                             |
| ATOM 71 | N   | N     | . GLU GLU GLU A A 9 9   | . 84.754 85.446 7.109 1.00  |
| 2.59    | 1   | . . . |                         |                             |
| ATOM 72 | CA  | CA    | . GLU GLU GLU A A 9 9   | . 85.896 86.322 7.181 1.00  |
| 2.67    | 1   | . . . |                         |                             |
| ATOM 73 | CB  | CB    | . GLU GLU GLU A A 9 9   | . 86.832 85.935 6.076 1.00  |
| 5.88    | 1   | . . . |                         |                             |
| ATOM 74 | CG  | CG    | . GLU GLU GLU A A 9 9   | . 88.227 85.720 6.412 1.00  |
| 8.82    | 1   | . . . |                         |                             |
| ATOM 75 | CD  | CD    | . GLU GLU GLU A A 9 9   | . 89.080 85.325 5.210 1.00  |
| 8.86    | 1   | . . . |                         |                             |
| ATOM 76 | OE1 | OE1   | . GLU GLU GLU A A 9 9   | . 90.179 84.782 5.535 1.00  |
| 2.74    | 1   | . . . |                         |                             |
| ATOM 77 | OE2 | OE2   | . GLU GLU GLU A A 9 9   | . 88.638 85.589 4.015 1.00  |
| 10.47   | 1   | . . . |                         |                             |
| ATOM 78 | C   | C     | . GLU GLU GLU A A 9 9   | . 85.425 87.776 6.963 1.00  |
| 2.33    | 1   | . . . |                         |                             |
| ATOM 79 | O   | O     | . GLU GLU GLU A A 9 9   | . 84.656 88.034 6.008 1.00  |
| 4.01    | 1   | . . . |                         |                             |
| ATOM 80 | N   | N     | . ILE ILE ILE A A 10 10 | . 85.794 88.704 7.840 1.00  |
| 2.36    | 1   | . . . |                         |                             |
| ATOM 81 | CA  | CA    | . ILE ILE ILE A A 10 10 | . 85.620 90.163 7.600 1.00  |
| 2.30    | 1   | . . . |                         |                             |
| ATOM 82 | CB  | CB    | . ILE ILE ILE A A 10 10 | . 84.659 90.839 8.511 1.00  |
| 2.22    | 1   | . . . |                         |                             |
| ATOM 83 | CG1 | CG1   | . ILE ILE ILE A A 10 10 | . 85.134 90.769 9.965 1.00  |
| 2.00    | 1   | . . . |                         |                             |
| ATOM 84 | CD1 | CD1   | . ILE ILE ILE A A 10 10 | . 84.236 91.662 10.853 1.00 |
| 3.56    | 1   | . . . |                         |                             |
| ATOM 85 | CG2 | CG2   | . ILE ILE ILE A A 10 10 | . 83.213 90.329 8.368 1.00  |
| 2.45    | 1   | . . . |                         |                             |
| ATOM 86 | C   | C     | . ILE ILE ILE A A 10 10 | . 87.013 90.779 7.751 1.00  |
| 2.03    | 1   | . . . |                         |                             |
| ATOM 87 | O   | O     | . ILE ILE ILE A A 10 10 | . 87.975 90.109 8.120 1.00  |
| 2.80    | 1   | . . . |                         |                             |
| ATOM 88 | N   | N     | . LEU LEU LEU A A 11 11 | . 87.129 92.089 7.485 1.00  |
| 2.42    | 1   | . . . |                         |                             |
| ATOM 89 | CA  | CA    | . LEU LEU LEU A A 11 11 | . 88.455 92.739 7.689 1.00  |
| 2.00    | 1   | . . . |                         |                             |
| ATOM 90 | CB  | CB    | . LEU LEU LEU A A 11 11 | . 88.909 93.601 6.482 1.00  |
| 2.75    | 1   | . . . |                         |                             |
| ATOM 91 | CG  | CG    | . LEU LEU LEU A A 11 11 | . 89.100 92.838 5.170 1.00  |
| 2.37    | 1   | . . . |                         |                             |
| ATOM 92 | CD1 | CD1   | . LEU LEU LEU A A 11 11 | . 89.740 93.848 4.189 1.00  |
| 2.20    | 1   | . . . |                         |                             |
| ATOM 93 | CD2 | CD2   | . LEU LEU LEU A A 11 11 | . 89.989 91.554 5.357 1.00  |
| 2.39    | 1   | . . . |                         |                             |
| ATOM 94 | C   | C     | . LEU LEU LEU A A 11 11 | . 88.466 93.599 8.973 1.00  |
| 2.35    | 1   | . . . |                         |                             |
| ATOM 95 | O   | O     | . LEU LEU LEU A A 11 11 | . 87.495 94.305 9.190 1.00  |
| 2.01    | 1   | . . . |                         |                             |
| ATOM 96 | N   | N     | . ASP ASP ASP A A 12 12 | . 89.570 93.550 9.719 1.00  |
| 2.00    | 1   | . . . |                         |                             |



|          |     |     |                           |        |        |        |      |
|----------|-----|-----|---------------------------|--------|--------|--------|------|
| ATOM 97  | CA  | CA  | . ASP ASP ASP A A 12 12 . | 89.660 | 94.324 | 10.941 | 1.00 |
| 2.23     | 1   | . . |                           |        |        |        |      |
| ATOM 98  | CB  | CB  | . ASP ASP ASP A A 12 12 . | 90.539 | 93.554 | 11.968 | 1.00 |
| 2.00     | 1   | . . |                           |        |        |        |      |
| ATOM 99  | CG  | CG  | . ASP ASP ASP A A 12 12 . | 92.021 | 93.641 | 11.717 | 1.00 |
| 4.92     | 1   | . . |                           |        |        |        |      |
| ATOM 100 | OD1 | OD1 | . ASP ASP ASP A A 12 12 . | 92.513 | 94.354 | 10.769 | 1.00 |
| 2.00     | 1   | . . |                           |        |        |        |      |
| ATOM 101 | OD2 | OD2 | . ASP ASP ASP A A 12 12 . | 92.768 | 92.960 | 12.507 | 1.00 |
| 2.65     | 1   | . . |                           |        |        |        |      |
| ATOM 102 | C   | C   | . ASP ASP ASP A A 12 12 . | 90.216 | 95.731 | 10.623 | 1.00 |
| 2.20     | 1   | . . |                           |        |        |        |      |
| ATOM 103 | O   | O   | . ASP ASP ASP A A 12 12 . | 90.406 | 96.074 | 9.414  | 1.00 |
| 2.04     | 1   | . . |                           |        |        |        |      |
| ATOM 104 | N   | N   | . SER SER SER A A 13 13 . | 90.417 | 96.564 | 11.635 | 1.00 |
| 2.38     | 1   | . . |                           |        |        |        |      |
| ATOM 105 | CA  | CA  | . SER SER SER A A 13 13 . | 90.767 | 97.947 | 11.380 | 1.00 |
| 2.00     | 1   | . . |                           |        |        |        |      |
| ATOM 106 | CB  | CB  | . SER SER SER A A 13 13 . | 90.676 | 98.719 | 12.718 | 1.00 |
| 2.35     | 1   | . . |                           |        |        |        |      |
| ATOM 107 | OG  | OG  | . SER SER SER A A 13 13 . | 91.588 | 98.145 | 13.673 | 1.00 |
| 2.00     | 1   | . . |                           |        |        |        |      |
| ATOM 108 | C   | C   | . SER SER SER A A 13 13 . | 92.134 | 98.183 | 10.787 | 1.00 |
| 2.11     | 1   | . . |                           |        |        |        |      |
| ATOM 109 | O   | O   | . SER SER SER A A 13 13 . | 92.431 | 99.299 | 10.446 | 1.00 |
| 2.76     | 1   | . . |                           |        |        |        |      |
| ATOM 110 | N   | N   | . ARG ARG ARG A A 14 14 . | 93.000 | 97.170 | 10.702 | 1.00 |
| 2.00     | 1   | . . |                           |        |        |        |      |
| ATOM 111 | CA  | CA  | . ARG ARG ARG A A 14 14 . | 94.249 | 97.277 | 10.021 | 1.00 |
| 2.57     | 1   | . . |                           |        |        |        |      |
| ATOM 112 | CB  | CB  | . ARG ARG ARG A A 14 14 . | 95.347 | 96.489 | 10.746 | 1.00 |
| 3.59     | 1   | . . |                           |        |        |        |      |
| ATOM 113 | CG  | CG  | . ARG ARG ARG A A 14 14 . | 96.187 | 97.407 | 11.624 | 1.00 |
| 4.71     | 1   | . . |                           |        |        |        |      |
| ATOM 114 | CD  | CD  | . ARG ARG ARG A A 14 14 . | 97.320 | 96.698 | 12.362 | 1.00 |
| 6.68     | 1   | . . |                           |        |        |        |      |
| ATOM 115 | NE  | NE  | . ARG ARG ARG A A 14 14 . | 96.892 | 95.613 | 13.234 | 1.00 |
| 10.34    | 1   | . . |                           |        |        |        |      |
| ATOM 116 | CZ  | CZ  | . ARG ARG ARG A A 14 14 . | 97.106 | 95.568 | 14.538 | 1.00 |
| 6.35     | 1   | . . |                           |        |        |        |      |
| ATOM 117 | NH1 | NH1 | . ARG ARG ARG A A 14 14 . | 97.742 | 96.595 | 15.180 | 1.00 |
| 4.01     | 1   | . . |                           |        |        |        |      |
| ATOM 118 | NH2 | NH2 | . ARG ARG ARG A A 14 14 . | 96.660 | 94.522 | 15.211 | 1.00 |
| 9.50     | 1   | . . |                           |        |        |        |      |
| ATOM 119 | C   | C   | . ARG ARG ARG A A 14 14 . | 94.143 | 96.603 | 8.630  | 1.00 |
| 2.11     | 1   | . . |                           |        |        |        |      |
| ATOM 120 | O   | O   | . ARG ARG ARG A A 14 14 . | 95.167 | 96.518 | 7.959  | 1.00 |
| 2.90     | 1   | . . |                           |        |        |        |      |
| ATOM 121 | N   | N   | . GLY GLY GLY A A 15 15 . | 92.984 | 96.110 | 8.201  | 1.00 |
| 2.09     | 1   | . . |                           |        |        |        |      |
| ATOM 122 | CA  | CA  | . GLY GLY GLY A A 15 15 . | 92.849 | 95.450 | 6.908  | 1.00 |
| 2.24     | 1   | . . |                           |        |        |        |      |
| ATOM 123 | C   | C   | . GLY GLY GLY A A 15 15 . | 93.227 | 94.004 | 6.889  | 1.00 |
| 2.97     | 1   | . . |                           |        |        |        |      |







|          |     |     |                           |        |        |        |      |
|----------|-----|-----|---------------------------|--------|--------|--------|------|
| ATOM 205 | N   | N   | . ALA ALA ALA A A 26 26 . | 65.121 | 82.013 | 17.496 | 1.00 |
| 10.68    | 1   | . . |                           |        |        |        |      |
| ATOM 206 | CA  | CA  | . ALA ALA ALA A A 26 26 . | 63.776 | 82.404 | 17.137 | 1.00 |
| 12.12    | 1   | . . |                           |        |        |        |      |
| ATOM 207 | CB  | CB  | . ALA ALA ALA A A 26 26 . | 62.755 | 81.646 | 17.978 | 1.00 |
| 11.95    | 1   | . . |                           |        |        |        |      |
| ATOM 208 | C   | C   | . ALA ALA ALA A A 26 26 . | 63.614 | 83.913 | 17.291 | 1.00 |
| 12.84    | 1   | . . |                           |        |        |        |      |
| ATOM 209 | O   | O   | . ALA ALA ALA A A 26 26 . | 62.681 | 84.447 | 16.737 | 1.00 |
| 14.67    | 1   | . . |                           |        |        |        |      |
| ATOM 210 | N   | N   | . LYS LYS LYS A A 27 27 . | 64.502 | 84.589 | 18.032 | 1.00 |
| 14.04    | 1   | . . |                           |        |        |        |      |
| ATOM 211 | CA  | CA  | . LYS LYS LYS A A 27 27 . | 64.500 | 86.056 | 18.133 | 1.00 |
| 15.02    | 1   | . . |                           |        |        |        |      |
| ATOM 212 | CB  | CB  | . LYS LYS LYS A A 27 27 . | 65.230 | 86.506 | 19.400 | 1.00 |
| 13.60    | 1   | . . |                           |        |        |        |      |
| ATOM 213 | CG  | CG  | . LYS LYS LYS A A 27 27 . | 64.614 | 86.015 | 20.705 | 1.00 |
| 18.33    | 1   | . . |                           |        |        |        |      |
| ATOM 214 | CD  | CD  | . LYS LYS LYS A A 27 27 . | 63.475 | 86.894 | 21.096 | 1.00 |
| 22.41    | 1   | . . |                           |        |        |        |      |
| ATOM 215 | CE  | CE  | . LYS LYS LYS A A 27 27 . | 62.819 | 86.462 | 22.363 | 1.00 |
| 22.76    | 1   | . . |                           |        |        |        |      |
| ATOM 216 | NZ  | NZ  | . LYS LYS LYS A A 27 27 . | 61.472 | 87.053 | 22.306 | 1.00 |
| 21.55    | 1   | . . |                           |        |        |        |      |
| ATOM 217 | C   | C   | . LYS LYS LYS A A 27 27 . | 65.133 | 86.811 | 16.932 | 1.00 |
| 15.31    | 1   | . . |                           |        |        |        |      |
| ATOM 218 | O   | O   | . LYS LYS LYS A A 27 27 . | 64.944 | 88.032 | 16.744 | 1.00 |
| 16.86    | 1   | . . |                           |        |        |        |      |
| ATOM 219 | N   | N   | . GLY GLY GLY A A 28 28 . | 65.906 | 86.110 | 16.119 | 1.00 |
| 15.00    | 1   | . . |                           |        |        |        |      |
| ATOM 220 | CA  | CA  | . GLY GLY GLY A A 28 28 . | 66.501 | 86.792 | 15.001 | 1.00 |
| 14.10    | 1   | . . |                           |        |        |        |      |
| ATOM 221 | C   | C   | . GLY GLY GLY A A 28 28 . | 67.968 | 86.484 | 14.939 | 1.00 |
| 11.99    | 1   | . . |                           |        |        |        |      |
| ATOM 222 | O   | O   | . GLY GLY GLY A A 28 28 . | 68.425 | 85.428 | 15.445 | 1.00 |
| 12.76    | 1   | . . |                           |        |        |        |      |
| ATOM 223 | N   | N   | . LEU LEU LEU A A 29 29 . | 68.718 | 87.455 | 14.403 | 1.00 |
| 9.99     | 1   | . . |                           |        |        |        |      |
| ATOM 224 | CA  | CA  | . LEU LEU LEU A A 29 29 . | 70.114 | 87.318 | 14.015 | 1.00 |
| 9.43     | 1   | . . |                           |        |        |        |      |
| ATOM 225 | CB  | CB  | . LEU LEU LEU A A 29 29 . | 70.341 | 87.908 | 12.609 | 1.00 |
| 11.15    | 1   | . . |                           |        |        |        |      |
| ATOM 226 | CG  | CG  | . LEU LEU LEU A A 29 29 . | 71.678 | 87.508 | 11.937 | 1.00 |
| 14.35    | 1   | . . |                           |        |        |        |      |
| ATOM 227 | CD1 | CD1 | . LEU LEU LEU A A 29 29 . | 71.730 | 87.759 | 10.413 | 1.00 |
| 16.33    | 1   | . . |                           |        |        |        |      |
| ATOM 228 | CD2 | CD2 | . LEU LEU LEU A A 29 29 . | 72.845 | 88.233 | 12.570 | 1.00 |
| 15.10    | 1   | . . |                           |        |        |        |      |
| ATOM 229 | C   | C   | . LEU LEU LEU A A 29 29 . | 70.970 | 88.103 | 14.984 | 1.00 |
| 7.11     | 1   | . . |                           |        |        |        |      |
| ATOM 230 | O   | O   | . LEU LEU LEU A A 29 29 . | 70.667 | 89.288 | 15.229 | 1.00 |
| 9.38     | 1   | . . |                           |        |        |        |      |
| ATOM 231 | N   | N   | . PHE PHE PHE A A 30 30 . | 72.009 | 87.461 | 15.537 | 1.00 |
| 4.56     | 1   | . . |                           |        |        |        |      |









|          |       |     |                           |         |        |        |      |
|----------|-------|-----|---------------------------|---------|--------|--------|------|
| ATOM 313 | CD1   | CD1 | . ILE ILE ILE A A 42 42 . | 106.672 | 83.709 | 26.333 | 1.00 |
| 10.15    | 1 . . |     |                           |         |        |        |      |
| ATOM 314 | CG2   | CG2 | . ILE ILE ILE A A 42 42 . | 105.933 | 85.113 | 23.734 | 1.00 |
| 5.48     | 1 . . |     |                           |         |        |        |      |
| ATOM 315 | C     | C   | . ILE ILE ILE A A 42 42 . | 102.488 | 83.669 | 24.917 | 1.00 |
| 3.19     | 1 . . |     |                           |         |        |        |      |
| ATOM 316 | O     | O   | . ILE ILE ILE A A 42 42 . | 102.237 | 82.549 | 24.412 | 1.00 |
| 4.44     | 1 . . |     |                           |         |        |        |      |
| ATOM 317 | N     | N   | . TYR TYR TYR A A 43 43 . | 101.883 | 84.061 | 26.036 | 1.00 |
| 4.73     | 1 . . |     |                           |         |        |        |      |
| ATOM 318 | CA    | CA  | . TYR TYR TYR A A 43 43 . | 100.908 | 83.186 | 26.708 | 1.00 |
| 3.11     | 1 . . |     |                           |         |        |        |      |
| ATOM 319 | CB    | CB  | . TYR TYR TYR A A 43 43 . | 101.073 | 83.332 | 28.260 | 1.00 |
| 5.07     | 1 . . |     |                           |         |        |        |      |
| ATOM 320 | CG    | CG  | . TYR TYR TYR A A 43 43 . | 102.459 | 82.993 | 28.713 | 1.00 |
| 6.49     | 1 . . |     |                           |         |        |        |      |
| ATOM 321 | CD1   | CD1 | . TYR TYR TYR A A 43 43 . | 103.355 | 83.966 | 29.121 | 1.00 |
| 9.73     | 1 . . |     |                           |         |        |        |      |
| ATOM 322 | CE1   | CE1 | . TYR TYR TYR A A 43 43 . | 104.641 | 83.625 | 29.514 | 1.00 |
| 9.08     | 1 . . |     |                           |         |        |        |      |
| ATOM 323 | CZ    | CZ  | . TYR TYR TYR A A 43 43 . | 105.035 | 82.278 | 29.493 | 1.00 |
| 11.93    | 1 . . |     |                           |         |        |        |      |
| ATOM 324 | OH    | OH  | . TYR TYR TYR A A 43 43 . | 106.297 | 81.869 | 29.910 | 1.00 |
| 10.68    | 1 . . |     |                           |         |        |        |      |
| ATOM 325 | CE2   | CE2 | . TYR TYR TYR A A 43 43 . | 104.133 | 81.300 | 29.086 | 1.00 |
| 10.86    | 1 . . |     |                           |         |        |        |      |
| ATOM 326 | CD2   | CD2 | . TYR TYR TYR A A 43 43 . | 102.888 | 81.662 | 28.691 | 1.00 |
| 6.35     | 1 . . |     |                           |         |        |        |      |
| ATOM 327 | C     | C   | . TYR TYR TYR A A 43 43 . | 99.460  | 83.349 | 26.318 | 1.00 |
| 3.02     | 1 . . |     |                           |         |        |        |      |
| ATOM 328 | O     | O   | . TYR TYR TYR A A 43 43 . | 98.620  | 82.662 | 26.894 | 1.00 |
| 4.67     | 1 . . |     |                           |         |        |        |      |
| ATOM 329 | N     | N   | . GLU GLU GLU A A 44 44 . | 99.154  | 84.200 | 25.325 | 1.00 |
| 3.86     | 1 . . |     |                           |         |        |        |      |
| ATOM 330 | CA    | CA  | . GLU GLU GLU A A 44 44 . | 97.763  | 84.314 | 24.877 | 1.00 |
| 3.02     | 1 . . |     |                           |         |        |        |      |
| ATOM 331 | CB    | CB  | . GLU GLU GLU A A 44 44 . | 97.611  | 85.447 | 23.825 | 1.00 |
| 3.07     | 1 . . |     |                           |         |        |        |      |
| ATOM 332 | CG    | CG  | . GLU GLU GLU A A 44 44 . | 98.048  | 86.801 | 24.424 | 1.00 |
| 3.59     | 1 . . |     |                           |         |        |        |      |
| ATOM 333 | CD    | CD  | . GLU GLU GLU A A 44 44 . | 97.667  | 87.983 | 23.563 | 1.00 |
| 4.32     | 1 . . |     |                           |         |        |        |      |
| ATOM 334 | OE1   | OE1 | . GLU GLU GLU A A 44 44 . | 96.806  | 87.827 | 22.657 | 1.00 |
| 2.79     | 1 . . |     |                           |         |        |        |      |
| ATOM 335 | OE2   | OE2 | . GLU GLU GLU A A 44 44 . | 98.152  | 89.081 | 23.835 | 1.00 |
| 2.57     | 1 . . |     |                           |         |        |        |      |
| ATOM 336 | C     | C   | . GLU GLU GLU A A 44 44 . | 97.265  | 83.026 | 24.199 | 1.00 |
| 2.46     | 1 . . |     |                           |         |        |        |      |
| ATOM 337 | O     | O   | . GLU GLU GLU A A 44 44 . | 98.041  | 82.257 | 23.646 | 1.00 |
| 3.60     | 1 . . |     |                           |         |        |        |      |
| ATOM 338 | N     | N   | . ALA ALA ALA A A 45 45 . | 95.964  | 82.781 | 24.324 | 1.00 |
| 3.17     | 1 . . |     |                           |         |        |        |      |
| ATOM 339 | CA    | CA  | . ALA ALA ALA A A 45 45 . | 95.300  | 81.662 | 23.625 | 1.00 |
| 2.01     | 1 . . |     |                           |         |        |        |      |



|          |     |     |                           |         |        |        |      |
|----------|-----|-----|---------------------------|---------|--------|--------|------|
| ATOM 367 | O   | O   | . LEU LEU LEU A A 48 48 . | 93.328  | 81.827 | 12.768 | 1.00 |
| 2.85     | 1   | . . |                           |         |        |        |      |
| ATOM 368 | N   | N   | . ARG ARG ARG A A 49 49 . | 95.500  | 81.284 | 12.349 | 1.00 |
| 2.84     | 1   | . . |                           |         |        |        |      |
| ATOM 369 | CA  | CA  | . ARG ARG ARG A A 49 49 . | 95.595  | 81.866 | 10.985 | 1.00 |
| 4.27     | 1   | . . |                           |         |        |        |      |
| ATOM 370 | CB  | CB  | . ARG ARG ARG A A 49 49 . | 96.718  | 82.935 | 10.915 | 1.00 |
| 4.64     | 1   | . . |                           |         |        |        |      |
| ATOM 371 | CG  | CG  | . ARG ARG ARG A A 49 49 . | 96.498  | 84.126 | 11.905 | 1.00 |
| 7.49     | 1   | . . |                           |         |        |        |      |
| ATOM 372 | CD  | CD  | . ARG ARG ARG A A 49 49 . | 96.077  | 85.340 | 11.234 | 1.00 |
| 10.51    | 1   | . . |                           |         |        |        |      |
| ATOM 373 | NE  | NE  | . ARG ARG ARG A A 49 49 . | 95.876  | 86.417 | 12.185 | 1.00 |
| 6.19     | 1   | . . |                           |         |        |        |      |
| ATOM 374 | CZ  | CZ  | . ARG ARG ARG A A 49 49 . | 94.964  | 87.334 | 11.926 | 1.00 |
| 5.24     | 1   | . . |                           |         |        |        |      |
| ATOM 375 | NH1 | NH1 | . ARG ARG ARG A A 49 49 . | 94.280  | 87.269 | 10.806 | 1.00 |
| 5.54     | 1   | . . |                           |         |        |        |      |
| ATOM 376 | NH2 | NH2 | . ARG ARG ARG A A 49 49 . | 94.710  | 88.302 | 12.747 | 1.00 |
| 5.51     | 1   | . . |                           |         |        |        |      |
| ATOM 377 | C   | C   | . ARG ARG ARG A A 49 49 . | 95.837  | 80.742 | 9.968  | 1.00 |
| 3.92     | 1   | . . |                           |         |        |        |      |
| ATOM 378 | O   | O   | . ARG ARG ARG A A 49 49 . | 96.402  | 79.720 | 10.345 | 1.00 |
| 5.43     | 1   | . . |                           |         |        |        |      |
| ATOM 379 | N   | N   | . ASP ASP ASP A A 50 50 . | 95.498  | 80.967 | 8.694  | 1.00 |
| 3.36     | 1   | . . |                           |         |        |        |      |
| ATOM 380 | CA  | CA  | . ASP ASP ASP A A 50 50 . | 95.598  | 79.917 | 7.715  | 1.00 |
| 4.52     | 1   | . . |                           |         |        |        |      |
| ATOM 381 | CB  | CB  | . ASP ASP ASP A A 50 50 . | 94.773  | 80.197 | 6.478  | 1.00 |
| 2.59     | 1   | . . |                           |         |        |        |      |
| ATOM 382 | CG  | CG  | . ASP ASP ASP A A 50 50 . | 93.310  | 80.386 | 6.793  | 1.00 |
| 2.44     | 1   | . . |                           |         |        |        |      |
| ATOM 383 | OD1 | OD1 | . ASP ASP ASP A A 50 50 . | 92.879  | 79.921 | 7.869  | 1.00 |
| 2.29     | 1   | . . |                           |         |        |        |      |
| ATOM 384 | OD2 | OD2 | . ASP ASP ASP A A 50 50 . | 92.606  | 81.070 | 6.023  | 1.00 |
| 4.13     | 1   | . . |                           |         |        |        |      |
| ATOM 385 | C   | C   | . ASP ASP ASP A A 50 50 . | 97.014  | 79.615 | 7.313  | 1.00 |
| 5.30     | 1   | . . |                           |         |        |        |      |
| ATOM 386 | O   | O   | . ASP ASP ASP A A 50 50 . | 97.254  | 78.460 | 6.984  | 1.00 |
| 5.56     | 1   | . . |                           |         |        |        |      |
| ATOM 387 | N   | N   | . GLY GLY GLY A A 51 51 . | 97.882  | 80.645 | 7.233  | 1.00 |
| 7.86     | 1   | . . |                           |         |        |        |      |
| ATOM 388 | CA  | CA  | . GLY GLY GLY A A 51 51 . | 99.246  | 80.494 | 6.727  | 1.00 |
| 7.92     | 1   | . . |                           |         |        |        |      |
| ATOM 389 | C   | C   | . GLY GLY GLY A A 51 51 . | 99.391  | 80.256 | 5.210  | 1.00 |
| 9.04     | 1   | . . |                           |         |        |        |      |
| ATOM 390 | O   | O   | . GLY GLY GLY A A 51 51 . | 100.422 | 79.743 | 4.710  | 1.00 |
| 12.69    | 1   | . . |                           |         |        |        |      |
| ATOM 391 | N   | N   | . ASP ASP ASP A A 52 52 . | 98.355  | 80.579 | 4.452  | 1.00 |
| 8.48     | 1   | . . |                           |         |        |        |      |
| ATOM 392 | CA  | CA  | . ASP ASP ASP A A 52 52 . | 98.451  | 80.498 | 2.995  | 1.00 |
| 10.38    | 1   | . . |                           |         |        |        |      |
| ATOM 393 | CB  | CB  | . ASP ASP ASP A A 52 52 . | 97.048  | 80.253 | 2.408  | 1.00 |
| 10.33    | 1   | . . |                           |         |        |        |      |

|          |     |     |                           |         |        |        |      |
|----------|-----|-----|---------------------------|---------|--------|--------|------|
| ATOM 394 | CG  | CG  | . ASP ASP ASP A A 52 52 . | 97.040  | 80.252 | 0.890  | 1.00 |
| 12.20    | 1   | . . |                           |         |        |        |      |
| ATOM 395 | OD1 | OD1 | . ASP ASP ASP A A 52 52 . | 95.997  | 79.927 | 0.343  | 1.00 |
| 13.71    | 1   | . . |                           |         |        |        |      |
| ATOM 396 | OD2 | OD2 | . ASP ASP ASP A A 52 52 . | 98.049  | 80.570 | 0.253  | 1.00 |
| 16.84    | 1   | . . |                           |         |        |        |      |
| ATOM 397 | C   | C   | . ASP ASP ASP A A 52 52 . | 99.065  | 81.802 | 2.471  | 1.00 |
| 13.15    | 1   | . . |                           |         |        |        |      |
| ATOM 398 | O   | O   | . ASP ASP ASP A A 52 52 . | 98.413  | 82.841 | 2.432  | 1.00 |
| 10.86    | 1   | . . |                           |         |        |        |      |
| ATOM 399 | N   | N   | . LYS LYS LYS A A 53 53 . | 100.345 | 81.744 | 2.106  | 1.00 |
| 14.79    | 1   | . . |                           |         |        |        |      |
| ATOM 400 | CA  | CA  | . LYS LYS LYS A A 53 53 . | 101.063 | 82.891 | 1.576  | 1.00 |
| 19.54    | 1   | . . |                           |         |        |        |      |
| ATOM 401 | CB  | CB  | . LYS LYS LYS A A 53 53 . | 102.551 | 82.536 | 1.441  | 1.00 |
| 20.32    | 1   | . . |                           |         |        |        |      |
| ATOM 402 | CG  | CG  | . LYS LYS LYS A A 53 53 . | 103.200 | 82.055 | 2.756  | 1.00 |
| 22.71    | 1   | . . |                           |         |        |        |      |
| ATOM 403 | CD  | CD  | . LYS LYS LYS A A 53 53 . | 103.286 | 83.190 | 3.771  | 1.00 |
| 27.89    | 1   | . . |                           |         |        |        |      |
| ATOM 404 | CE  | CE  | . LYS LYS LYS A A 53 53 . | 104.534 | 84.012 | 3.532  | 1.00 |
| 31.24    | 1   | . . |                           |         |        |        |      |
| ATOM 405 | NZ  | NZ  | . LYS LYS LYS A A 53 53 . | 105.763 | 83.310 | 4.038  | 1.00 |
| 31.61    | 1   | . . |                           |         |        |        |      |
| ATOM 406 | C   | C   | . LYS LYS LYS A A 53 53 . | 100.487 | 83.484 | 0.279  | 1.00 |
| 19.52    | 1   | . . |                           |         |        |        |      |
| ATOM 407 | O   | O   | . LYS LYS LYS A A 53 53 . | 100.842 | 84.600 | -0.111 | 1.00 |
| 21.53    | 1   | . . |                           |         |        |        |      |
| ATOM 408 | N   | N   | . GLN GLN GLN A A 54 54 . | 99.599  | 82.773 | -0.405 | 1.00 |
| 20.01    | 1   | . . |                           |         |        |        |      |
| ATOM 409 | CA  | CA  | . GLN GLN GLN A A 54 54 . | 98.971  | 83.357 | -1.604 | 1.00 |
| 20.60    | 1   | . . |                           |         |        |        |      |
| ATOM 410 | CB  | CB  | . GLN GLN GLN A A 54 54 . | 98.932  | 82.358 | -2.741 | 1.00 |
| 21.18    | 1   | . . |                           |         |        |        |      |
| ATOM 411 | CG  | CG  | . GLN GLN GLN A A 54 54 . | 100.337 | 82.027 | -3.260 | 1.00 |
| 25.65    | 1   | . . |                           |         |        |        |      |
| ATOM 412 | CD  | CD  | . GLN GLN GLN A A 54 54 . | 101.063 | 83.281 | -3.813 | 1.00 |
| 29.89    | 1   | . . |                           |         |        |        |      |
| ATOM 413 | OE1 | OE1 | . GLN GLN GLN A A 54 54 . | 100.687 | 83.822 | -4.865 | 1.00 |
| 31.98    | 1   | . . |                           |         |        |        |      |
| ATOM 414 | NE2 | NE2 | . GLN GLN GLN A A 54 54 . | 102.095 | 83.746 | -3.091 | 1.00 |
| 29.06    | 1   | . . |                           |         |        |        |      |
| ATOM 415 | C   | C   | . GLN GLN GLN A A 54 54 . | 97.612  | 83.997 | -1.327 | 1.00 |
| 19.37    | 1   | . . |                           |         |        |        |      |
| ATOM 416 | O   | O   | . GLN GLN GLN A A 54 54 . | 96.787  | 84.228 | -2.239 | 1.00 |
| 20.57    | 1   | . . |                           |         |        |        |      |
| ATOM 417 | N   | N   | . ARG ARG ARG A A 55 55 . | 97.410  | 84.346 | -0.054 | 1.00 |
| 16.88    | 1   | . . |                           |         |        |        |      |
| ATOM 418 | CA  | CA  | . ARG ARG ARG A A 55 55 . | 96.138  | 84.887 | 0.373  | 1.00 |
| 13.18    | 1   | . . |                           |         |        |        |      |
| ATOM 419 | CB  | CB  | . ARG ARG ARG A A 55 55 . | 95.195  | 83.717 | 0.591  | 1.00 |
| 13.74    | 1   | . . |                           |         |        |        |      |
| ATOM 420 | CG  | CG  | . ARG ARG ARG A A 55 55 . | 93.820  | 84.143 | 0.765  | 1.00 |
| 11.15    | 1   | . . |                           |         |        |        |      |



|          |     |     |                           |         |        |        |      |
|----------|-----|-----|---------------------------|---------|--------|--------|------|
| ATOM 448 | N   | N   | . GLY GLY GLY A A 58 58 . | 99.293  | 85.227 | 4.254  | 1.00 |
| 10.18    | 1   | . . |                           |         |        |        |      |
| ATOM 449 | CA  | CA  | . GLY GLY GLY A A 58 58 . | 99.227  | 84.211 | 5.334  | 1.00 |
| 8.78     | 1   | . . |                           |         |        |        |      |
| ATOM 450 | C   | C   | . GLY GLY GLY A A 58 58 . | 98.220  | 84.421 | 6.440  | 1.00 |
| 6.65     | 1   | . . |                           |         |        |        |      |
| ATOM 451 | O   | O   | . GLY GLY GLY A A 58 58 . | 98.110  | 83.577 | 7.370  | 1.00 |
| 8.67     | 1   | . . |                           |         |        |        |      |
| ATOM 452 | N   | N   | . LYS LYS LYS A A 59 59 . | 97.475  | 85.533 | 6.367  | 1.00 |
| 4.43     | 1   | . . |                           |         |        |        |      |
| ATOM 453 | CA  | CA  | . LYS LYS LYS A A 59 59 . | 96.634  | 85.984 | 7.494  | 1.00 |
| 4.55     | 1   | . . |                           |         |        |        |      |
| ATOM 454 | CB  | CB  | . LYS LYS LYS A A 59 59 . | 96.798  | 87.506 | 7.689  | 1.00 |
| 4.64     | 1   | . . |                           |         |        |        |      |
| ATOM 455 | CG  | CG  | . LYS LYS LYS A A 59 59 . | 98.198  | 87.787 | 8.075  | 1.00 |
| 12.05    | 1   | . . |                           |         |        |        |      |
| ATOM 456 | CD  | CD  | . LYS LYS LYS A A 59 59 . | 98.397  | 89.092 | 8.870  | 1.00 |
| 15.40    | 1   | . . |                           |         |        |        |      |
| ATOM 457 | CE  | CE  | . LYS LYS LYS A A 59 59 . | 99.891  | 89.338 | 9.252  | 1.00 |
| 15.50    | 1   | . . |                           |         |        |        |      |
| ATOM 458 | NZ  | NZ  | . LYS LYS LYS A A 59 59 . | 100.126 | 90.763 | 9.730  | 1.00 |
| 18.45    | 1   | . . |                           |         |        |        |      |
| ATOM 459 | C   | C   | . LYS LYS LYS A A 59 59 . | 95.184  | 85.598 | 7.423  | 1.00 |
| 2.48     | 1   | . . |                           |         |        |        |      |
| ATOM 460 | O   | O   | . LYS LYS LYS A A 59 59 . | 94.358  | 86.088 | 8.210  | 1.00 |
| 2.00     | 1   | . . |                           |         |        |        |      |
| ATOM 461 | N   | N   | . GLY GLY GLY A A 60 60 . | 94.788  | 84.745 | 6.472  | 1.00 |
| 2.41     | 1   | . . |                           |         |        |        |      |
| ATOM 462 | CA  | CA  | . GLY GLY GLY A A 60 60 . | 93.387  | 84.380 | 6.372  | 1.00 |
| 2.37     | 1   | . . |                           |         |        |        |      |
| ATOM 463 | C   | C   | . GLY GLY GLY A A 60 60 . | 92.897  | 83.650 | 7.623  | 1.00 |
| 2.00     | 1   | . . |                           |         |        |        |      |
| ATOM 464 | O   | O   | . GLY GLY GLY A A 60 60 . | 93.687  | 83.092 | 8.391  | 1.00 |
| 2.27     | 1   | . . |                           |         |        |        |      |
| ATOM 465 | N   | N   | . VAL VAL VAL A A 61 61 . | 91.584  | 83.594 | 7.802  | 1.00 |
| 2.70     | 1   | . . |                           |         |        |        |      |
| ATOM 466 | CA  | CA  | . VAL VAL VAL A A 61 61 . | 91.040  | 82.862 | 8.932  | 1.00 |
| 2.86     | 1   | . . |                           |         |        |        |      |
| ATOM 467 | CB  | CB  | . VAL VAL VAL A A 61 61 . | 90.568  | 83.774 | 10.114 | 1.00 |
| 3.32     | 1   | . . |                           |         |        |        |      |
| ATOM 468 | CG1 | CG1 | . VAL VAL VAL A A 61 61 . | 91.731  | 84.549 | 10.687 | 1.00 |
| 4.15     | 1   | . . |                           |         |        |        |      |
| ATOM 469 | CG2 | CG2 | . VAL VAL VAL A A 61 61 . | 89.503  | 84.749 | 9.611  | 1.00 |
| 2.41     | 1   | . . |                           |         |        |        |      |
| ATOM 470 | C   | C   | . VAL VAL VAL A A 61 61 . | 89.938  | 81.901 | 8.468  | 1.00 |
| 2.63     | 1   | . . |                           |         |        |        |      |
| ATOM 471 | O   | O   | . VAL VAL VAL A A 61 61 . | 88.993  | 81.582 | 9.197  | 1.00 |
| 2.31     | 1   | . . |                           |         |        |        |      |
| ATOM 472 | N   | N   | . LEU LEU LEU A A 62 62 . | 90.155  | 81.360 | 7.275  | 1.00 |
| 3.11     | 1   | . . |                           |         |        |        |      |
| ATOM 473 | CA  | CA  | . LEU LEU LEU A A 62 62 . | 89.244  | 80.349 | 6.713  | 1.00 |
| 2.00     | 1   | . . |                           |         |        |        |      |
| ATOM 474 | CB  | CB  | . LEU LEU LEU A A 62 62 . | 89.704  | 79.975 | 5.273  | 1.00 |
| 2.69     | 1   | . . |                           |         |        |        |      |



|          |       |     |                           |        |        |        |      |
|----------|-------|-----|---------------------------|--------|--------|--------|------|
| ATOM 502 | CA    | CA  | . ASP ASP ASP A A 66 66 . | 85.355 | 76.223 | 8.877  | 1.00 |
| 2.16     | 1 . . |     |                           |        |        |        |      |
| ATOM 503 | CB    | CB  | . ASP ASP ASP A A 66 66 . | 86.365 | 75.504 | 8.017  | 1.00 |
| 4.82     | 1 . . |     |                           |        |        |        |      |
| ATOM 504 | CG    | CG  | . ASP ASP ASP A A 66 66 . | 85.989 | 74.056 | 7.814  | 1.00 |
| 8.28     | 1 . . |     |                           |        |        |        |      |
| ATOM 505 | OD1   | OD1 | . ASP ASP ASP A A 66 66 . | 84.817 | 73.803 | 7.464  | 1.00 |
| 14.71    | 1 . . |     |                           |        |        |        |      |
| ATOM 506 | OD2   | OD2 | . ASP ASP ASP A A 66 66 . | 86.847 | 73.157 | 8.053  | 1.00 |
| 22.56    | 1 . . |     |                           |        |        |        |      |
| ATOM 507 | C     | C   | . ASP ASP ASP A A 66 66 . | 85.115 | 75.469 | 10.234 | 1.00 |
| 2.73     | 1 . . |     |                           |        |        |        |      |
| ATOM 508 | O     | O   | . ASP ASP ASP A A 66 66 . | 84.173 | 74.680 | 10.353 | 1.00 |
| 2.86     | 1 . . |     |                           |        |        |        |      |
| ATOM 509 | N     | N   | . HIS HIS HIS A A 67 67 . | 86.039 | 75.611 | 11.193 | 1.00 |
| 3.53     | 1 . . |     |                           |        |        |        |      |
| ATOM 510 | CA    | CA  | . HIS HIS HIS A A 67 67 . | 85.804 | 74.977 | 12.486 | 1.00 |
| 2.15     | 1 . . |     |                           |        |        |        |      |
| ATOM 511 | CB    | CB  | . HIS HIS HIS A A 67 67 . | 86.975 | 75.281 | 13.477 | 1.00 |
| 3.44     | 1 . . |     |                           |        |        |        |      |
| ATOM 512 | CG    | CG  | . HIS HIS HIS A A 67 67 . | 88.269 | 74.592 | 13.129 | 1.00 |
| 4.23     | 1 . . |     |                           |        |        |        |      |
| ATOM 513 | ND1   | ND1 | . HIS HIS HIS A A 67 67 . | 88.368 | 73.215 | 12.917 | 1.00 |
| 8.29     | 1 . . |     |                           |        |        |        |      |
| ATOM 514 | CE1   | CE1 | . HIS HIS HIS A A 67 67 . | 89.637 | 72.895 | 12.705 | 1.00 |
| 7.33     | 1 . . |     |                           |        |        |        |      |
| ATOM 515 | NE2   | NE2 | . HIS HIS HIS A A 67 67 . | 90.358 | 73.998 | 12.743 | 1.00 |
| 6.18     | 1 . . |     |                           |        |        |        |      |
| ATOM 516 | CD2   | CD2 | . HIS HIS HIS A A 67 67 . | 89.537 | 75.052 | 13.094 | 1.00 |
| 6.42     | 1 . . |     |                           |        |        |        |      |
| ATOM 517 | C     | C   | . HIS HIS HIS A A 67 67 . | 84.425 | 75.354 | 13.049 | 1.00 |
| 2.38     | 1 . . |     |                           |        |        |        |      |
| ATOM 518 | O     | O   | . HIS HIS HIS A A 67 67 . | 83.652 | 74.506 | 13.592 | 1.00 |
| 2.63     | 1 . . |     |                           |        |        |        |      |
| ATOM 519 | N     | N   | . ILE ILE ILE A A 68 68 . | 84.129 | 76.654 | 13.004 | 1.00 |
| 2.01     | 1 . . |     |                           |        |        |        |      |
| ATOM 520 | CA    | CA  | . ILE ILE ILE A A 68 68 . | 82.880 | 77.100 | 13.548 | 1.00 |
| 2.26     | 1 . . |     |                           |        |        |        |      |
| ATOM 521 | CB    | CB  | . ILE ILE ILE A A 68 68 . | 82.739 | 78.649 | 13.421 | 1.00 |
| 2.39     | 1 . . |     |                           |        |        |        |      |
| ATOM 522 | CG1   | CG1 | . ILE ILE ILE A A 68 68 . | 83.716 | 79.273 | 14.385 | 1.00 |
| 2.00     | 1 . . |     |                           |        |        |        |      |
| ATOM 523 | CD1   | CD1 | . ILE ILE ILE A A 68 68 . | 83.980 | 80.747 | 14.077 | 1.00 |
| 2.96     | 1 . . |     |                           |        |        |        |      |
| ATOM 524 | CG2   | CG2 | . ILE ILE ILE A A 68 68 . | 81.310 | 79.070 | 13.692 | 1.00 |
| 3.44     | 1 . . |     |                           |        |        |        |      |
| ATOM 525 | C     | C   | . ILE ILE ILE A A 68 68 . | 81.722 | 76.504 | 12.706 | 1.00 |
| 2.14     | 1 . . |     |                           |        |        |        |      |
| ATOM 526 | O     | O   | . ILE ILE ILE A A 68 68 . | 80.723 | 75.954 | 13.257 | 1.00 |
| 3.11     | 1 . . |     |                           |        |        |        |      |
| ATOM 527 | N     | N   | . ASN ASN ASN A A 69 69 . | 81.795 | 76.695 | 11.380 | 1.00 |
| 2.66     | 1 . . |     |                           |        |        |        |      |
| ATOM 528 | CA    | CA  | . ASN ASN ASN A A 69 69 . | 80.631 | 76.295 | 10.555 | 1.00 |
| 2.72     | 1 . . |     |                           |        |        |        |      |







|          |     |     |                         |          |        |        |      |
|----------|-----|-----|-------------------------|----------|--------|--------|------|
| ATOM 583 | CB  | CB  | . ILE ILE ILE A A 77 77 | . 72.366 | 73.024 | 16.412 | 1.00 |
| 8.24     | 1   | . . |                         |          |        |        |      |
| ATOM 584 | CG1 | CG1 | . ILE ILE ILE A A 77 77 | . 72.714 | 74.370 | 15.837 | 1.00 |
| 8.03     | 1   | . . |                         |          |        |        |      |
| ATOM 585 | CD1 | CD1 | . ILE ILE ILE A A 77 77 | . 72.832 | 74.424 | 14.328 | 1.00 |
| 9.92     | 1   | . . |                         |          |        |        |      |
| ATOM 586 | CG2 | CG2 | . ILE ILE ILE A A 77 77 | . 70.944 | 72.552 | 16.070 | 1.00 |
| 10.11    | 1   | . . |                         |          |        |        |      |
| ATOM 587 | C   | C   | . ILE ILE ILE A A 77 77 | . 72.167 | 71.705 | 18.632 | 1.00 |
| 7.98     | 1   | . . |                         |          |        |        |      |
| ATOM 588 | O   | O   | . ILE ILE ILE A A 77 77 | . 71.175 | 71.637 | 19.371 | 1.00 |
| 8.74     | 1   | . . |                         |          |        |        |      |
| ATOM 589 | N   | N   | . SER SER SER A A 78 78 | . 73.023 | 70.689 | 18.512 | 1.00 |
| 7.92     | 1   | . . |                         |          |        |        |      |
| ATOM 590 | CA  | CA  | . SER SER SER A A 78 78 | . 72.717 | 69.388 | 19.090 | 1.00 |
| 8.68     | 1   | . . |                         |          |        |        |      |
| ATOM 591 | CB  | CB  | . SER SER SER A A 78 78 | . 73.886 | 68.412 | 18.874 | 1.00 |
| 7.83     | 1   | . . |                         |          |        |        |      |
| ATOM 592 | OG  | OG  | . SER SER SER A A 78 78 | . 73.986 | 67.989 | 17.510 | 1.00 |
| 13.16    | 1   | . . |                         |          |        |        |      |
| ATOM 593 | C   | C   | . SER SER SER A A 78 78 | . 72.418 | 69.498 | 20.578 | 1.00 |
| 8.67     | 1   | . . |                         |          |        |        |      |
| ATOM 594 | O   | O   | . SER SER SER A A 78 78 | . 71.584 | 68.823 | 21.056 | 1.00 |
| 10.07    | 1   | . . |                         |          |        |        |      |
| ATOM 595 | N   | N   | . SER SER SER A A 79 79 | . 73.152 | 70.326 | 21.314 | 1.00 |
| 7.55     | 1   | . . |                         |          |        |        |      |
| ATOM 596 | CA  | CA  | . SER SER SER A A 79 79 | . 73.028 | 70.428 | 22.750 | 1.00 |
| 9.65     | 1   | . . |                         |          |        |        |      |
| ATOM 597 | CB  | CB  | . SER SER SER A A 79 79 | . 74.025 | 71.467 | 23.199 | 1.00 |
| 10.12    | 1   | . . |                         |          |        |        |      |
| ATOM 598 | OG  | OG  | . SER SER SER A A 79 79 | . 73.486 | 72.783 | 23.177 | 1.00 |
| 9.04     | 1   | . . |                         |          |        |        |      |
| ATOM 599 | C   | C   | . SER SER SER A A 79 79 | . 71.641 | 70.832 | 23.222 | 1.00 |
| 9.46     | 1   | . . |                         |          |        |        |      |
| ATOM 600 | O   | O   | . SER SER SER A A 79 79 | . 71.213 | 70.458 | 24.289 | 1.00 |
| 11.93    | 1   | . . |                         |          |        |        |      |
| ATOM 601 | N   | N   | . GLY GLY GLY A A 80 80 | . 70.920 | 71.536 | 22.351 | 1.00 |
| 10.85    | 1   | . . |                         |          |        |        |      |
| ATOM 602 | CA  | CA  | . GLY GLY GLY A A 80 80 | . 69.586 | 72.056 | 22.656 | 1.00 |
| 9.50     | 1   | . . |                         |          |        |        |      |
| ATOM 603 | C   | C   | . GLY GLY GLY A A 80 80 | . 69.535 | 73.101 | 23.745 | 1.00 |
| 9.89     | 1   | . . |                         |          |        |        |      |
| ATOM 604 | O   | O   | . GLY GLY GLY A A 80 80 | . 68.450 | 73.531 | 24.127 | 1.00 |
| 11.10    | 1   | . . |                         |          |        |        |      |
| ATOM 605 | N   | N   | . LEU LEU LEU A A 81 81 | . 70.686 | 73.479 | 24.281 | 1.00 |
| 9.78     | 1   | . . |                         |          |        |        |      |
| ATOM 606 | CA  | CA  | . LEU LEU LEU A A 81 81 | . 70.744 | 74.514 | 25.255 | 1.00 |
| 9.28     | 1   | . . |                         |          |        |        |      |
| ATOM 607 | CB  | CB  | . LEU LEU LEU A A 81 81 | . 72.176 | 74.665 | 25.762 | 1.00 |
| 8.90     | 1   | . . |                         |          |        |        |      |
| ATOM 608 | CG  | CG  | . LEU LEU LEU A A 81 81 | . 72.744 | 73.396 | 26.377 | 1.00 |
| 8.87     | 1   | . . |                         |          |        |        |      |
| ATOM 609 | CD1 | CD1 | . LEU LEU LEU A A 81 81 | . 74.237 | 73.551 | 26.481 | 1.00 |
| 6.07     | 1   | . . |                         |          |        |        |      |

|          |     |     |                   |    |    |          |        |        |      |
|----------|-----|-----|-------------------|----|----|----------|--------|--------|------|
| ATOM 610 | CD2 | CD2 | . LEU LEU LEU A A | 81 | 81 | . 72.045 | 73.196 | 27.653 | 1.00 |
| 10.22    | 1   | . . |                   |    |    |          |        |        |      |
| ATOM 611 | C   | C   | . LEU LEU LEU A A | 81 | 81 | . 70.234 | 75.890 | 24.785 | 1.00 |
| 9.98     | 1   | . . |                   |    |    |          |        |        |      |
| ATOM 612 | O   | O   | . LEU LEU LEU A A | 81 | 81 | . 70.465 | 76.332 | 23.606 | 1.00 |
| 8.58     | 1   | . . |                   |    |    |          |        |        |      |
| ATOM 613 | N   | N   | . SER SER SER A A | 82 | 82 | . 69.550 | 76.573 | 25.700 | 1.00 |
| 8.70     | 1   | . . |                   |    |    |          |        |        |      |
| ATOM 614 | CA  | CA  | . SER SER SER A A | 82 | 82 | . 69.158 | 77.972 | 25.487 | 1.00 |
| 7.43     | 1   | . . |                   |    |    |          |        |        |      |
| ATOM 615 | CB  | CB  | . SER SER SER A A | 82 | 82 | . 68.217 | 78.490 | 26.582 | 1.00 |
| 9.63     | 1   | . . |                   |    |    |          |        |        |      |
| ATOM 616 | OG  | OG  | . SER SER SER A A | 82 | 82 | . 67.911 | 79.876 | 26.351 | 1.00 |
| 10.38    | 1   | . . |                   |    |    |          |        |        |      |
| ATOM 617 | C   | C   | . SER SER SER A A | 82 | 82 | . 70.407 | 78.855 | 25.405 | 1.00 |
| 6.80     | 1   | . . |                   |    |    |          |        |        |      |
| ATOM 618 | O   | O   | . SER SER SER A A | 82 | 82 | . 71.373 | 78.619 | 26.110 | 1.00 |
| 5.79     | 1   | . . |                   |    |    |          |        |        |      |
| ATOM 619 | N   | N   | . VAL VAL VAL A A | 83 | 83 | . 70.402 | 79.842 | 24.500 | 1.00 |
| 5.99     | 1   | . . |                   |    |    |          |        |        |      |
| ATOM 620 | CA  | CA  | . VAL VAL VAL A A | 83 | 83 | . 71.526 | 80.819 | 24.421 | 1.00 |
| 6.11     | 1   | . . |                   |    |    |          |        |        |      |
| ATOM 621 | CB  | CB  | . VAL VAL VAL A A | 83 | 83 | . 71.368 | 81.803 | 23.216 | 1.00 |
| 4.21     | 1   | . . |                   |    |    |          |        |        |      |
| ATOM 622 | CG1 | CG1 | . VAL VAL VAL A A | 83 | 83 | . 71.601 | 81.096 | 21.907 | 1.00 |
| 4.31     | 1   | . . |                   |    |    |          |        |        |      |
| ATOM 623 | CG2 | CG2 | . VAL VAL VAL A A | 83 | 83 | . 70.077 | 82.455 | 23.237 | 1.00 |
| 5.61     | 1   | . . |                   |    |    |          |        |        |      |
| ATOM 624 | C   | C   | . VAL VAL VAL A A | 83 | 83 | . 71.741 | 81.584 | 25.727 | 1.00 |
| 5.61     | 1   | . . |                   |    |    |          |        |        |      |
| ATOM 625 | O   | O   | . VAL VAL VAL A A | 83 | 83 | . 72.773 | 82.259 | 25.858 | 1.00 |
| 6.11     | 1   | . . |                   |    |    |          |        |        |      |
| ATOM 626 | N   | N   | . VAL VAL VAL A A | 84 | 84 | . 70.754 | 81.589 | 26.644 | 1.00 |
| 6.66     | 1   | . . |                   |    |    |          |        |        |      |
| ATOM 627 | CA  | CA  | . VAL VAL VAL A A | 84 | 84 | . 70.984 | 82.210 | 27.947 | 1.00 |
| 5.87     | 1   | . . |                   |    |    |          |        |        |      |
| ATOM 628 | CB  | CB  | . VAL VAL VAL A A | 84 | 84 | . 69.716 | 82.394 | 28.809 | 1.00 |
| 6.69     | 1   | . . |                   |    |    |          |        |        |      |
| ATOM 629 | CG1 | CG1 | . VAL VAL VAL A A | 84 | 84 | . 68.588 | 83.070 | 28.110 | 1.00 |
| 9.33     | 1   | . . |                   |    |    |          |        |        |      |
| ATOM 630 | CG2 | CG2 | . VAL VAL VAL A A | 84 | 84 | . 69.301 | 81.007 | 29.406 | 1.00 |
| 7.36     | 1   | . . |                   |    |    |          |        |        |      |
| ATOM 631 | C   | C   | . VAL VAL VAL A A | 84 | 84 | . 72.010 | 81.451 | 28.787 | 1.00 |
| 6.46     | 1   | . . |                   |    |    |          |        |        |      |
| ATOM 632 | O   | O   | . VAL VAL VAL A A | 84 | 84 | . 72.579 | 81.982 | 29.718 | 1.00 |
| 7.48     | 1   | . . |                   |    |    |          |        |        |      |
| ATOM 633 | N   | N   | . GLU GLU GLU A A | 85 | 85 | . 72.235 | 80.191 | 28.438 | 1.00 |
| 7.93     | 1   | . . |                   |    |    |          |        |        |      |
| ATOM 634 | CA  | CA  | . GLU GLU GLU A A | 85 | 85 | . 73.215 | 79.338 | 29.127 | 1.00 |
| 6.99     | 1   | . . |                   |    |    |          |        |        |      |
| ATOM 635 | CB  | CB  | . GLU GLU GLU A A | 85 | 85 | . 72.817 | 77.867 | 29.047 | 1.00 |
| 7.58     | 1   | . . |                   |    |    |          |        |        |      |
| ATOM 636 | CG  | CG  | . GLU GLU GLU A A | 85 | 85 | . 71.514 | 77.528 | 29.680 | 1.00 |
| 11.26    | 1   | . . |                   |    |    |          |        |        |      |

|          |       |     |                           |        |        |        |      |
|----------|-------|-----|---------------------------|--------|--------|--------|------|
| ATOM 637 | CD    | CD  | . GLU GLU GLU A A 85 85 . | 71.399 | 77.842 | 31.181 | 1.00 |
| 12.99    | 1 . . |     |                           |        |        |        |      |
| ATOM 638 | OE1   | OE1 | . GLU GLU GLU A A 85 85 . | 72.425 | 77.844 | 31.915 | 1.00 |
| 15.20    | 1 . . |     |                           |        |        |        |      |
| ATOM 639 | OE2   | OE2 | . GLU GLU GLU A A 85 85 . | 70.240 | 78.067 | 31.623 | 1.00 |
| 15.37    | 1 . . |     |                           |        |        |        |      |
| ATOM 640 | C     | C   | . GLU GLU GLU A A 85 85 . | 74.658 | 79.513 | 28.663 | 1.00 |
| 4.94     | 1 . . |     |                           |        |        |        |      |
| ATOM 641 | O     | O   | . GLU GLU GLU A A 85 85 . | 75.306 | 78.564 | 28.226 | 1.00 |
| 6.06     | 1 . . |     |                           |        |        |        |      |
| ATOM 642 | N     | N   | . GLN GLN GLN A A 86 86 . | 75.175 | 80.721 | 28.855 | 1.00 |
| 4.85     | 1 . . |     |                           |        |        |        |      |
| ATOM 643 | CA    | CA  | . GLN GLN GLN A A 86 86 . | 76.526 | 81.118 | 28.441 | 1.00 |
| 5.44     | 1 . . |     |                           |        |        |        |      |
| ATOM 644 | CB    | CB  | . GLN GLN GLN A A 86 86 . | 76.910 | 82.522 | 28.956 | 1.00 |
| 6.29     | 1 . . |     |                           |        |        |        |      |
| ATOM 645 | CG    | CG  | . GLN GLN GLN A A 86 86 . | 78.259 | 83.014 | 28.431 | 1.00 |
| 4.31     | 1 . . |     |                           |        |        |        |      |
| ATOM 646 | CD    | CD  | . GLN GLN GLN A A 86 86 . | 78.158 | 83.451 | 26.931 | 1.00 |
| 3.38     | 1 . . |     |                           |        |        |        |      |
| ATOM 647 | OE1   | OE1 | . GLN GLN GLN A A 86 86 . | 77.172 | 83.980 | 26.569 | 1.00 |
| 4.06     | 1 . . |     |                           |        |        |        |      |
| ATOM 648 | NE2   | NE2 | . GLN GLN GLN A A 86 86 . | 79.112 | 83.105 | 26.070 | 1.00 |
| 2.85     | 1 . . |     |                           |        |        |        |      |
| ATOM 649 | C     | C   | . GLN GLN GLN A A 86 86 . | 77.611 | 80.145 | 28.908 | 1.00 |
| 3.57     | 1 . . |     |                           |        |        |        |      |
| ATOM 650 | O     | O   | . GLN GLN GLN A A 86 86 . | 78.400 | 79.673 | 28.102 | 1.00 |
| 3.11     | 1 . . |     |                           |        |        |        |      |
| ATOM 651 | N     | N   | . GLU GLU GLU A A 87 87 . | 77.617 | 79.835 | 30.232 | 1.00 |
| 4.94     | 1 . . |     |                           |        |        |        |      |
| ATOM 652 | CA    | CA  | . GLU GLU GLU A A 87 87 . | 78.627 | 78.970 | 30.732 | 1.00 |
| 5.00     | 1 . . |     |                           |        |        |        |      |
| ATOM 653 | CB    | CB  | . GLU GLU GLU A A 87 87 . | 78.551 | 78.888 | 32.264 | 1.00 |
| 6.83     | 1 . . |     |                           |        |        |        |      |
| ATOM 654 | CG    | CG  | . GLU GLU GLU A A 87 87 . | 79.766 | 78.198 | 32.885 | 1.00 |
| 10.15    | 1 . . |     |                           |        |        |        |      |
| ATOM 655 | CD    | CD  | . GLU GLU GLU A A 87 87 . | 79.780 | 78.381 | 34.404 | 1.00 |
| 15.46    | 1 . . |     |                           |        |        |        |      |
| ATOM 656 | OE1   | OE1 | . GLU GLU GLU A A 87 87 . | 78.845 | 79.045 | 34.886 | 1.00 |
| 17.93    | 1 . . |     |                           |        |        |        |      |
| ATOM 657 | OE2   | OE2 | . GLU GLU GLU A A 87 87 . | 80.654 | 77.824 | 35.103 | 1.00 |
| 18.42    | 1 . . |     |                           |        |        |        |      |
| ATOM 658 | C     | C   | . GLU GLU GLU A A 87 87 . | 78.562 | 77.532 | 30.139 | 1.00 |
| 5.58     | 1 . . |     |                           |        |        |        |      |
| ATOM 659 | O     | O   | . GLU GLU GLU A A 87 87 . | 79.632 | 76.924 | 29.838 | 1.00 |
| 7.09     | 1 . . |     |                           |        |        |        |      |
| ATOM 660 | N     | N   | . LYS LYS LYS A A 88 88 . | 77.348 | 76.954 | 30.054 | 1.00 |
| 7.09     | 1 . . |     |                           |        |        |        |      |
| ATOM 661 | CA    | CA  | . LYS LYS LYS A A 88 88 . | 77.264 | 75.582 | 29.528 | 1.00 |
| 6.70     | 1 . . |     |                           |        |        |        |      |
| ATOM 662 | CB    | CB  | . LYS LYS LYS A A 88 88 . | 75.844 | 74.973 | 29.679 | 1.00 |
| 8.39     | 1 . . |     |                           |        |        |        |      |
| ATOM 663 | CG    | CG  | . LYS LYS LYS A A 88 88 . | 75.527 | 74.618 | 31.114 | 1.00 |
| 9.20     | 1 . . |     |                           |        |        |        |      |

|          |     |     |                         |          |        |        |      |
|----------|-----|-----|-------------------------|----------|--------|--------|------|
| ATOM 664 | CD  | CD  | . LYS LYS LYS A A 88 88 | . 74.096 | 74.227 | 31.325 | 1.00 |
| 10.91    | 1   | . . |                         |          |        |        |      |
| ATOM 665 | CE  | CE  | . LYS LYS LYS A A 88 88 | . 73.870 | 74.127 | 32.880 | 1.00 |
| 10.82    | 1   | . . |                         |          |        |        |      |
| ATOM 666 | NZ  | NZ  | . LYS LYS LYS A A 88 88 | . 72.734 | 74.968 | 33.338 | 1.00 |
| 19.33    | 1   | . . |                         |          |        |        |      |
| ATOM 667 | C   | C   | . LYS LYS LYS A A 88 88 | . 77.787 | 75.523 | 28.084 | 1.00 |
| 6.15     | 1   | . . |                         |          |        |        |      |
| ATOM 668 | O   | O   | . LYS LYS LYS A A 88 88 | . 78.555 | 74.591 | 27.730 | 1.00 |
| 4.70     | 1   | . . |                         |          |        |        |      |
| ATOM 669 | N   | N   | . LEU LEU LEU A A 89 89 | . 77.373 | 76.498 | 27.269 | 1.00 |
| 4.64     | 1   | . . |                         |          |        |        |      |
| ATOM 670 | CA  | CA  | . LEU LEU LEU A A 89 89 | . 77.752 | 76.574 | 25.883 | 1.00 |
| 3.24     | 1   | . . |                         |          |        |        |      |
| ATOM 671 | CB  | CB  | . LEU LEU LEU A A 89 89 | . 76.952 | 77.617 | 25.088 | 1.00 |
| 3.28     | 1   | . . |                         |          |        |        |      |
| ATOM 672 | CG  | CG  | . LEU LEU LEU A A 89 89 | . 75.493 | 77.182 | 24.949 | 1.00 |
| 3.18     | 1   | . . |                         |          |        |        |      |
| ATOM 673 | CD1 | CD1 | . LEU LEU LEU A A 89 89 | . 74.526 | 78.385 | 24.558 | 1.00 |
| 3.58     | 1   | . . |                         |          |        |        |      |
| ATOM 674 | CD2 | CD2 | . LEU LEU LEU A A 89 89 | . 75.461 | 76.103 | 23.853 | 1.00 |
| 3.35     | 1   | . . |                         |          |        |        |      |
| ATOM 675 | C   | C   | . LEU LEU LEU A A 89 89 | . 79.251 | 76.814 | 25.685 | 1.00 |
| 3.23     | 1   | . . |                         |          |        |        |      |
| ATOM 676 | O   | O   | . LEU LEU LEU A A 89 89 | . 79.889 | 76.141 | 24.871 | 1.00 |
| 4.48     | 1   | . . |                         |          |        |        |      |
| ATOM 677 | N   | N   | . ASP ASP ASP A A 90 90 | . 79.820 | 77.717 | 26.461 | 1.00 |
| 3.45     | 1   | . . |                         |          |        |        |      |
| ATOM 678 | CA  | CA  | . ASP ASP ASP A A 90 90 | . 81.234 | 77.865 | 26.401 | 1.00 |
| 3.89     | 1   | . . |                         |          |        |        |      |
| ATOM 679 | CB  | CB  | . ASP ASP ASP A A 90 90 | . 81.712 | 79.023 | 27.302 | 1.00 |
| 3.90     | 1   | . . |                         |          |        |        |      |
| ATOM 680 | CG  | CG  | . ASP ASP ASP A A 90 90 | . 81.426 | 80.426 | 26.670 | 1.00 |
| 6.52     | 1   | . . |                         |          |        |        |      |
| ATOM 681 | OD1 | OD1 | . ASP ASP ASP A A 90 90 | . 81.314 | 80.549 | 25.445 | 1.00 |
| 5.17     | 1   | . . |                         |          |        |        |      |
| ATOM 682 | OD2 | OD2 | . ASP ASP ASP A A 90 90 | . 81.357 | 81.405 | 27.392 | 1.00 |
| 6.58     | 1   | . . |                         |          |        |        |      |
| ATOM 683 | C   | C   | . ASP ASP ASP A A 90 90 | . 81.926 | 76.604 | 26.823 | 1.00 |
| 4.63     | 1   | . . |                         |          |        |        |      |
| ATOM 684 | O   | O   | . ASP ASP ASP A A 90 90 | . 82.952 | 76.300 | 26.273 | 1.00 |
| 3.86     | 1   | . . |                         |          |        |        |      |
| ATOM 685 | N   | N   | . ASN ASN ASN A A 91 91 | . 81.449 | 75.982 | 27.885 | 1.00 |
| 4.50     | 1   | . . |                         |          |        |        |      |
| ATOM 686 | CA  | CA  | . ASN ASN ASN A A 91 91 | . 82.196 | 74.792 | 28.324 | 1.00 |
| 5.03     | 1   | . . |                         |          |        |        |      |
| ATOM 687 | CB  | CB  | . ASN ASN ASN A A 91 91 | . 81.700 | 74.258 | 29.710 | 1.00 |
| 5.42     | 1   | . . |                         |          |        |        |      |
| ATOM 688 | CG  | CG  | . ASN ASN ASN A A 91 91 | . 82.103 | 75.134 | 30.852 | 1.00 |
| 9.99     | 1   | . . |                         |          |        |        |      |
| ATOM 689 | OD1 | OD1 | . ASN ASN ASN A A 91 91 | . 83.102 | 75.864 | 30.794 | 1.00 |
| 12.06    | 1   | . . |                         |          |        |        |      |
| ATOM 690 | ND2 | ND2 | . ASN ASN ASN A A 91 91 | . 81.346 | 75.029 | 31.931 | 1.00 |
| 14.92    | 1   | . . |                         |          |        |        |      |

|          |     |     |                           |        |        |        |      |
|----------|-----|-----|---------------------------|--------|--------|--------|------|
| ATOM 691 | C   | C   | . ASN ASN ASN A A 91 91 . | 82.143 | 73.683 | 27.263 | 1.00 |
| 4.57     | 1   | . . |                           |        |        |        |      |
| ATOM 692 | O   | O   | . ASN ASN ASN A A 91 91 . | 83.132 | 72.945 | 27.065 | 1.00 |
| 6.39     | 1   | . . |                           |        |        |        |      |
| ATOM 693 | N   | N   | . LEU LEU LEU A A 92 92 . | 81.017 | 73.525 | 26.582 | 1.00 |
| 4.77     | 1   | . . |                           |        |        |        |      |
| ATOM 694 | CA  | CA  | . LEU LEU LEU A A 92 92 . | 80.907 | 72.595 | 25.447 | 1.00 |
| 5.39     | 1   | . . |                           |        |        |        |      |
| ATOM 695 | CB  | CB  | . LEU LEU LEU A A 92 92 . | 79.483 | 72.667 | 24.839 | 1.00 |
| 8.93     | 1   | . . |                           |        |        |        |      |
| ATOM 696 | CG  | CG  | . LEU LEU LEU A A 92 92 . | 78.549 | 71.521 | 24.449 | 1.00 |
| 12.21    | 1   | . . |                           |        |        |        |      |
| ATOM 697 | CD1 | CD1 | . LEU LEU LEU A A 92 92 . | 78.709 | 70.296 | 25.369 | 1.00 |
| 15.00    | 1   | . . |                           |        |        |        |      |
| ATOM 698 | CD2 | CD2 | . LEU LEU LEU A A 92 92 . | 77.113 | 71.954 | 24.441 | 1.00 |
| 10.34    | 1   | . . |                           |        |        |        |      |
| ATOM 699 | C   | C   | . LEU LEU LEU A A 92 92 . | 81.947 | 72.861 | 24.410 | 1.00 |
| 5.97     | 1   | . . |                           |        |        |        |      |
| ATOM 700 | O   | O   | . LEU LEU LEU A A 92 92 . | 82.607 | 71.943 | 23.909 | 1.00 |
| 5.45     | 1   | . . |                           |        |        |        |      |
| ATOM 701 | N   | N   | . MET MET MET A A 93 93 . | 82.167 | 74.140 | 24.080 | 1.00 |
| 5.48     | 1   | . . |                           |        |        |        |      |
| ATOM 702 | CA  | CA  | . MET MET MET A A 93 93 . | 83.291 | 74.400 | 23.134 | 1.00 |
| 2.51     | 1   | . . |                           |        |        |        |      |
| ATOM 703 | CB  | CB  | . MET MET MET A A 93 93 . | 83.259 | 75.868 | 22.633 | 1.00 |
| 5.17     | 1   | . . |                           |        |        |        |      |
| ATOM 704 | CG  | CG  | . MET MET MET A A 93 93 . | 81.925 | 76.226 | 22.001 | 1.00 |
| 5.63     | 1   | . . |                           |        |        |        |      |
| ATOM 705 | SD  | SD  | . MET MET MET A A 93 93 . | 81.864 | 77.840 | 21.092 | 1.00 |
| 3.29     | 1   | . . |                           |        |        |        |      |
| ATOM 706 | CE  | CE  | . MET MET MET A A 93 93 . | 81.558 | 78.975 | 22.441 | 1.00 |
| 6.60     | 1   | . . |                           |        |        |        |      |
| ATOM 707 | C   | C   | . MET MET MET A A 93 93 . | 84.646 | 74.159 | 23.743 | 1.00 |
| 3.87     | 1   | . . |                           |        |        |        |      |
| ATOM 708 | O   | O   | . MET MET MET A A 93 93 . | 85.534 | 73.698 | 23.041 | 1.00 |
| 3.01     | 1   | . . |                           |        |        |        |      |
| ATOM 709 | N   | N   | . LEU LEU LEU A A 94 94 . | 84.857 | 74.482 | 24.995 | 1.00 |
| 3.93     | 1   | . . |                           |        |        |        |      |
| ATOM 710 | CA  | CA  | . LEU LEU LEU A A 94 94 . | 86.202 | 74.324 | 25.520 | 1.00 |
| 3.75     | 1   | . . |                           |        |        |        |      |
| ATOM 711 | CB  | CB  | . LEU LEU LEU A A 94 94 . | 86.255 | 74.837 | 26.972 | 1.00 |
| 3.87     | 1   | . . |                           |        |        |        |      |
| ATOM 712 | CG  | CG  | . LEU LEU LEU A A 94 94 . | 86.107 | 76.305 | 27.203 | 1.00 |
| 9.81     | 1   | . . |                           |        |        |        |      |
| ATOM 713 | CD1 | CD1 | . LEU LEU LEU A A 94 94 . | 86.510 | 76.560 | 28.606 | 1.00 |
| 11.89    | 1   | . . |                           |        |        |        |      |
| ATOM 714 | CD2 | CD2 | . LEU LEU LEU A A 94 94 . | 86.993 | 77.001 | 26.337 | 1.00 |
| 10.87    | 1   | . . |                           |        |        |        |      |
| ATOM 715 | C   | C   | . LEU LEU LEU A A 94 94 . | 86.549 | 72.852 | 25.548 | 1.00 |
| 3.58     | 1   | . . |                           |        |        |        |      |
| ATOM 716 | O   | O   | . LEU LEU LEU A A 94 94 . | 87.682 | 72.459 | 25.287 | 1.00 |
| 3.99     | 1   | . . |                           |        |        |        |      |
| ATOM 717 | N   | N   | . GLU GLU GLU A A 95 95 . | 85.574 | 72.036 | 25.893 | 1.00 |
| 3.28     | 1   | . . |                           |        |        |        |      |

|          |       |     |                                                     |
|----------|-------|-----|-----------------------------------------------------|
| ATOM 718 | CA    | CA  | . GLU GLU GLU A A 95 95 . 85.799 70.591 25.952 1.00 |
| 4.95     | 1 . . |     |                                                     |
| ATOM 719 | CB    | CB  | . GLU GLU GLU A A 95 95 . 84.667 69.895 26.713 1.00 |
| 5.22     | 1 . . |     |                                                     |
| ATOM 720 | CG    | CG  | . GLU GLU GLU A A 95 95 . 84.759 70.260 28.235 1.00 |
| 11.05    | 1 . . |     |                                                     |
| ATOM 721 | CD    | CD  | . GLU GLU GLU A A 95 95 . 86.203 70.180 28.793 1.00 |
| 21.54    | 1 . . |     |                                                     |
| ATOM 722 | OE1   | OE1 | . GLU GLU GLU A A 95 95 . 86.771 69.067 28.909 1.00 |
| 24.72    | 1 . . |     |                                                     |
| ATOM 723 | OE2   | OE2 | . GLU GLU GLU A A 95 95 . 86.780 71.245 29.116 1.00 |
| 26.52    | 1 . . |     |                                                     |
| ATOM 724 | C     | C   | . GLU GLU GLU A A 95 95 . 85.991 70.015 24.560 1.00 |
| 5.28     | 1 . . |     |                                                     |
| ATOM 725 | O     | O   | . GLU GLU GLU A A 95 95 . 86.858 69.175 24.387 1.00 |
| 5.77     | 1 . . |     |                                                     |
| ATOM 726 | N     | N   | . LEU LEU LEU A A 96 96 . 85.254 70.528 23.578 1.00 |
| 4.30     | 1 . . |     |                                                     |
| ATOM 727 | CA    | CA  | . LEU LEU LEU A A 96 96 . 85.323 69.991 22.194 1.00 |
| 4.48     | 1 . . |     |                                                     |
| ATOM 728 | CB    | CB  | . LEU LEU LEU A A 96 96 . 84.125 70.466 21.374 1.00 |
| 4.09     | 1 . . |     |                                                     |
| ATOM 729 | CG    | CG  | . LEU LEU LEU A A 96 96 . 83.951 69.892 19.958 1.00 |
| 4.35     | 1 . . |     |                                                     |
| ATOM 730 | CD1   | CD1 | . LEU LEU LEU A A 96 96 . 83.776 68.332 20.187 1.00 |
| 5.46     | 1 . . |     |                                                     |
| ATOM 731 | CD2   | CD2 | . LEU LEU LEU A A 96 96 . 82.715 70.487 19.292 1.00 |
| 7.14     | 1 . . |     |                                                     |
| ATOM 732 | C     | C   | . LEU LEU LEU A A 96 96 . 86.626 70.323 21.518 1.00 |
| 3.76     | 1 . . |     |                                                     |
| ATOM 733 | O     | O   | . LEU LEU LEU A A 96 96 . 87.201 69.514 20.758 1.00 |
| 4.57     | 1 . . |     |                                                     |
| ATOM 734 | N     | N   | . ASP ASP ASP A A 97 97 . 87.190 71.499 21.823 1.00 |
| 3.36     | 1 . . |     |                                                     |
| ATOM 735 | CA    | CA  | . ASP ASP ASP A A 97 97 . 88.498 71.805 21.405 1.00 |
| 3.37     | 1 . . |     |                                                     |
| ATOM 736 | CB    | CB  | . ASP ASP ASP A A 97 97 . 88.766 73.305 21.657 1.00 |
| 2.98     | 1 . . |     |                                                     |
| ATOM 737 | CG    | CG  | . ASP ASP ASP A A 97 97 . 90.249 73.658 21.492 1.00 |
| 3.74     | 1 . . |     |                                                     |
| ATOM 738 | OD1   | OD1 | . ASP ASP ASP A A 97 97 . 90.663 74.145 20.428 1.00 |
| 4.39     | 1 . . |     |                                                     |
| ATOM 739 | OD2   | OD2 | . ASP ASP ASP A A 97 97 . 91.039 73.474 22.436 1.00 |
| 6.19     | 1 . . |     |                                                     |
| ATOM 740 | C     | C   | . ASP ASP ASP A A 97 97 . 89.491 70.928 22.215 1.00 |
| 5.22     | 1 . . |     |                                                     |
| ATOM 741 | O     | O   | . ASP ASP ASP A A 97 97 . 90.347 70.311 21.660 1.00 |
| 3.91     | 1 . . |     |                                                     |
| ATOM 742 | N     | N   | . GLY GLY GLY A A 98 98 . 89.368 70.920 23.538 1.00 |
| 5.13     | 1 . . |     |                                                     |
| ATOM 743 | CA    | CA  | . GLY GLY GLY A A 98 98 . 90.105 69.951 24.345 1.00 |
| 6.30     | 1 . . |     |                                                     |
| ATOM 744 | C     | C   | . GLY GLY GLY A A 98 98 . 91.557 70.239 24.563 1.00 |
| 6.68     | 1 . . |     |                                                     |













|          |    |     |                             |        |        |        |      |
|----------|----|-----|-----------------------------|--------|--------|--------|------|
| ATOM 880 | N  | N   | . CYS CYS CYS A A 118 118 . | 76.300 | 85.218 | 23.578 | 1.00 |
| 3.33     | 1  | . . |                             |        |        |        |      |
| ATOM 881 | CA | CA  | . CYS CYS CYS A A 118 118 . | 76.025 | 86.135 | 24.661 | 1.00 |
| 3.03     | 1  | . . |                             |        |        |        |      |
| ATOM 882 | CB | CB  | . CYS CYS CYS A A 118 118 . | 77.312 | 86.759 | 25.175 | 1.00 |
| 4.61     | 1  | . . |                             |        |        |        |      |
| ATOM 883 | SG | SG  | . CYS CYS CYS A A 118 118 . | 77.122 | 87.685 | 26.740 | 1.00 |
| 3.44     | 1  | . . |                             |        |        |        |      |
| ATOM 884 | C  | C   | . CYS CYS CYS A A 118 118 . | 74.994 | 87.197 | 24.215 | 1.00 |
| 2.77     | 1  | . . |                             |        |        |        |      |
| ATOM 885 | O  | O   | . CYS CYS CYS A A 118 118 . | 74.059 | 87.513 | 24.938 | 1.00 |
| 3.16     | 1  | . . |                             |        |        |        |      |
| ATOM 886 | N  | N   | . LYS LYS LYS A A 119 119 . | 75.148 | 87.764 | 23.002 | 1.00 |
| 2.00     | 1  | . . |                             |        |        |        |      |
| ATOM 887 | CA | CA  | . LYS LYS LYS A A 119 119 . | 74.176 | 88.699 | 22.445 | 1.00 |
| 2.25     | 1  | . . |                             |        |        |        |      |
| ATOM 888 | CB | CB  | . LYS LYS LYS A A 119 119 . | 74.703 | 89.241 | 21.126 | 1.00 |
| 3.10     | 1  | . . |                             |        |        |        |      |
| ATOM 889 | CG | CG  | . LYS LYS LYS A A 119 119 . | 75.988 | 90.003 | 21.303 | 1.00 |
| 2.89     | 1  | . . |                             |        |        |        |      |
| ATOM 890 | CD | CD  | . LYS LYS LYS A A 119 119 . | 76.615 | 90.414 | 19.934 | 1.00 |
| 8.07     | 1  | . . |                             |        |        |        |      |
| ATOM 891 | CE | CE  | . LYS LYS LYS A A 119 119 . | 77.872 | 91.215 | 20.110 | 1.00 |
| 7.65     | 1  | . . |                             |        |        |        |      |
| ATOM 892 | NZ | NZ  | . LYS LYS LYS A A 119 119 . | 78.307 | 92.021 | 18.855 | 1.00 |
| 6.05     | 1  | . . |                             |        |        |        |      |
| ATOM 893 | C  | C   | . LYS LYS LYS A A 119 119 . | 72.814 | 88.084 | 22.235 | 1.00 |
| 3.22     | 1  | . . |                             |        |        |        |      |
| ATOM 894 | O  | O   | . LYS LYS LYS A A 119 119 . | 71.751 | 88.692 | 22.519 | 1.00 |
| 4.06     | 1  | . . |                             |        |        |        |      |
| ATOM 895 | N  | N   | . ALA ALA ALA A A 120 120 . | 72.823 | 86.834 | 21.769 | 1.00 |
| 2.55     | 1  | . . |                             |        |        |        |      |
| ATOM 896 | CA | CA  | . ALA ALA ALA A A 120 120 . | 71.566 | 86.143 | 21.569 | 1.00 |
| 4.53     | 1  | . . |                             |        |        |        |      |
| ATOM 897 | CB | CB  | . ALA ALA ALA A A 120 120 . | 71.824 | 84.796 | 20.763 | 1.00 |
| 3.99     | 1  | . . |                             |        |        |        |      |
| ATOM 898 | C  | C   | . ALA ALA ALA A A 120 120 . | 70.900 | 85.904 | 22.925 | 1.00 |
| 5.08     | 1  | . . |                             |        |        |        |      |
| ATOM 899 | O  | O   | . ALA ALA ALA A A 120 120 . | 69.676 | 85.993 | 23.034 | 1.00 |
| 5.28     | 1  | . . |                             |        |        |        |      |
| ATOM 900 | N  | N   | . GLY GLY GLY A A 121 121 . | 71.717 | 85.661 | 23.953 | 1.00 |
| 3.77     | 1  | . . |                             |        |        |        |      |
| ATOM 901 | CA | CA  | . GLY GLY GLY A A 121 121 . | 71.238 | 85.333 | 25.283 | 1.00 |
| 5.68     | 1  | . . |                             |        |        |        |      |
| ATOM 902 | C  | C   | . GLY GLY GLY A A 121 121 . | 70.565 | 86.532 | 25.887 | 1.00 |
| 5.80     | 1  | . . |                             |        |        |        |      |
| ATOM 903 | O  | O   | . GLY GLY GLY A A 121 121 . | 69.472 | 86.468 | 26.528 | 1.00 |
| 4.80     | 1  | . . |                             |        |        |        |      |
| ATOM 904 | N  | N   | . ALA ALA ALA A A 122 122 . | 71.215 | 87.667 | 25.753 | 1.00 |
| 6.57     | 1  | . . |                             |        |        |        |      |
| ATOM 905 | CA | CA  | . ALA ALA ALA A A 122 122 . | 70.609 | 88.904 | 26.218 | 1.00 |
| 5.79     | 1  | . . |                             |        |        |        |      |
| ATOM 906 | CB | CB  | . ALA ALA ALA A A 122 122 . | 71.592 | 90.089 | 25.961 | 1.00 |
| 3.87     | 1  | . . |                             |        |        |        |      |

|          |     |     |                   |         |          |        |        |      |
|----------|-----|-----|-------------------|---------|----------|--------|--------|------|
| ATOM 907 | C   | C   | . ALA ALA ALA A A | 122 122 | . 69.233 | 89.145 | 25.515 | 1.00 |
| 4.15     | 1   | . . |                   |         |          |        |        |      |
| ATOM 908 | O   | O   | . ALA ALA ALA A A | 122 122 | . 68.239 | 89.518 | 26.192 | 1.00 |
| 6.24     | 1   | . . |                   |         |          |        |        |      |
| ATOM 909 | N   | N   | . ALA ALA ALA A A | 123 123 | . 69.119 | 88.907 | 24.196 | 1.00 |
| 4.78     | 1   | . . |                   |         |          |        |        |      |
| ATOM 910 | CA  | CA  | . ALA ALA ALA A A | 123 123 | . 67.803 | 89.041 | 23.575 | 1.00 |
| 7.02     | 1   | . . |                   |         |          |        |        |      |
| ATOM 911 | CB  | CB  | . ALA ALA ALA A A | 123 123 | . 67.908 | 88.817 | 22.075 | 1.00 |
| 7.26     | 1   | . . |                   |         |          |        |        |      |
| ATOM 912 | C   | C   | . ALA ALA ALA A A | 123 123 | . 66.820 | 88.054 | 24.168 | 1.00 |
| 7.76     | 1   | . . |                   |         |          |        |        |      |
| ATOM 913 | O   | O   | . ALA ALA ALA A A | 123 123 | . 65.645 | 88.362 | 24.284 | 1.00 |
| 8.42     | 1   | . . |                   |         |          |        |        |      |
| ATOM 914 | N   | N   | . GLU GLU GLU A A | 124 124 | . 67.279 | 86.848 | 24.534 | 1.00 |
| 8.76     | 1   | . . |                   |         |          |        |        |      |
| ATOM 915 | CA  | CA  | . GLU GLU GLU A A | 124 124 | . 66.320 | 85.801 | 24.900 | 1.00 |
| 9.48     | 1   | . . |                   |         |          |        |        |      |
| ATOM 916 | CB  | CB  | . GLU GLU GLU A A | 124 124 | . 66.982 | 84.423 | 24.996 | 1.00 |
| 10.34    | 1   | . . |                   |         |          |        |        |      |
| ATOM 917 | CG  | CG  | . GLU GLU GLU A A | 124 124 | . 65.946 | 83.261 | 24.985 | 1.00 |
| 14.49    | 1   | . . |                   |         |          |        |        |      |
| ATOM 918 | CD  | CD  | . GLU GLU GLU A A | 124 124 | . 65.205 | 83.209 | 23.678 | 1.00 |
| 18.74    | 1   | . . |                   |         |          |        |        |      |
| ATOM 919 | OE1 | OE1 | . GLU GLU GLU A A | 124 124 | . 65.855 | 83.153 | 22.591 | 1.00 |
| 17.25    | 1   | . . |                   |         |          |        |        |      |
| ATOM 920 | OE2 | OE2 | . GLU GLU GLU A A | 124 124 | . 63.959 | 83.230 | 23.723 | 1.00 |
| 24.85    | 1   | . . |                   |         |          |        |        |      |
| ATOM 921 | C   | C   | . GLU GLU GLU A A | 124 124 | . 65.728 | 86.234 | 26.258 | 1.00 |
| 9.66     | 1   | . . |                   |         |          |        |        |      |
| ATOM 922 | O   | O   | . GLU GLU GLU A A | 124 124 | . 64.509 | 86.080 | 26.524 | 1.00 |
| 10.23    | 1   | . . |                   |         |          |        |        |      |
| ATOM 923 | N   | N   | . ARG ARG ARG A A | 125 125 | . 66.575 | 86.820 | 27.087 | 1.00 |
| 8.96     | 1   | . . |                   |         |          |        |        |      |
| ATOM 924 | CA  | CA  | . ARG ARG ARG A A | 125 125 | . 66.160 | 87.412 | 28.370 | 1.00 |
| 9.51     | 1   | . . |                   |         |          |        |        |      |
| ATOM 925 | CB  | CB  | . ARG ARG ARG A A | 125 125 | . 67.383 | 87.784 | 29.231 | 1.00 |
| 8.54     | 1   | . . |                   |         |          |        |        |      |
| ATOM 926 | CG  | CG  | . ARG ARG ARG A A | 125 125 | . 68.389 | 86.674 | 29.657 | 1.00 |
| 10.84    | 1   | . . |                   |         |          |        |        |      |
| ATOM 927 | CD  | CD  | . ARG ARG ARG A A | 125 125 | . 67.753 | 85.977 | 30.774 | 1.00 |
| 6.81     | 1   | . . |                   |         |          |        |        |      |
| ATOM 928 | NE  | NE  | . ARG ARG ARG A A | 125 125 | . 68.618 | 85.060 | 31.499 | 1.00 |
| 10.76    | 1   | . . |                   |         |          |        |        |      |
| ATOM 929 | CZ  | CZ  | . ARG ARG ARG A A | 125 125 | . 68.250 | 83.824 | 31.809 | 1.00 |
| 8.68     | 1   | . . |                   |         |          |        |        |      |
| ATOM 930 | NH1 | NH1 | . ARG ARG ARG A A | 125 125 | . 69.089 | 83.028 | 32.504 | 1.00 |
| 13.61    | 1   | . . |                   |         |          |        |        |      |
| ATOM 931 | NH2 | NH2 | . ARG ARG ARG A A | 125 125 | . 67.056 | 83.372 | 31.394 | 1.00 |
| 9.76     | 1   | . . |                   |         |          |        |        |      |
| ATOM 932 | C   | C   | . ARG ARG ARG A A | 125 125 | . 65.358 | 88.715 | 28.239 | 1.00 |
| 9.08     | 1   | . . |                   |         |          |        |        |      |
| ATOM 933 | O   | O   | . ARG ARG ARG A A | 125 125 | . 64.856 | 89.272 | 29.269 | 1.00 |
| 11.32    | 1   | . . |                   |         |          |        |        |      |

|          |     |     |                             |        |        |        |      |
|----------|-----|-----|-----------------------------|--------|--------|--------|------|
| ATOM 934 | N   | N   | . GLU GLU GLU A A 126 126 . | 65.327 | 89.272 | 27.025 | 1.00 |
| 10.07    | 1   | . . |                             |        |        |        |      |
| ATOM 935 | CA  | CA  | . GLU GLU GLU A A 126 126 . | 64.680 | 90.595 | 26.785 | 1.00 |
| 12.02    | 1   | . . |                             |        |        |        |      |
| ATOM 936 | CB  | CB  | . GLU GLU GLU A A 126 126 . | 63.232 | 90.521 | 27.210 | 1.00 |
| 12.33    | 1   | . . |                             |        |        |        |      |
| ATOM 937 | CG  | CG  | . GLU GLU GLU A A 126 126 . | 62.290 | 91.270 | 26.382 | 1.00 |
| 17.78    | 1   | . . |                             |        |        |        |      |
| ATOM 938 | CD  | CD  | . GLU GLU GLU A A 126 126 . | 61.345 | 90.325 | 25.684 | 1.00 |
| 24.51    | 1   | . . |                             |        |        |        |      |
| ATOM 939 | OE1 | OE1 | . GLU GLU GLU A A 126 126 . | 60.110 | 90.521 | 25.770 | 1.00 |
| 26.85    | 1   | . . |                             |        |        |        |      |
| ATOM 940 | OE2 | OE2 | . GLU GLU GLU A A 126 126 . | 61.846 | 89.365 | 25.073 | 1.00 |
| 28.26    | 1   | . . |                             |        |        |        |      |
| ATOM 941 | C   | C   | . GLU GLU GLU A A 126 126 . | 65.387 | 91.687 | 27.621 | 1.00 |
| 10.90    | 1   | . . |                             |        |        |        |      |
| ATOM 942 | O   | O   | . GLU GLU GLU A A 126 126 . | 64.728 | 92.534 | 28.258 | 1.00 |
| 13.71    | 1   | . . |                             |        |        |        |      |
| ATOM 943 | N   | N   | . LEU LEU LEU A A 127 127 . | 66.721 | 91.626 | 27.634 | 1.00 |
| 9.15     | 1   | . . |                             |        |        |        |      |
| ATOM 944 | CA  | CA  | . LEU LEU LEU A A 127 127 . | 67.505 | 92.557 | 28.430 | 1.00 |
| 7.63     | 1   | . . |                             |        |        |        |      |
| ATOM 945 | CB  | CB  | . LEU LEU LEU A A 127 127 . | 68.255 | 91.835 | 29.538 | 1.00 |
| 7.42     | 1   | . . |                             |        |        |        |      |
| ATOM 946 | CG  | CG  | . LEU LEU LEU A A 127 127 . | 67.486 | 91.153 | 30.676 | 1.00 |
| 11.77    | 1   | . . |                             |        |        |        |      |
| ATOM 947 | CD1 | CD1 | . LEU LEU LEU A A 127 127 . | 68.454 | 90.370 | 31.527 | 1.00 |
| 9.13     | 1   | . . |                             |        |        |        |      |
| ATOM 948 | CD2 | CD2 | . LEU LEU LEU A A 127 127 . | 66.715 | 92.207 | 31.497 | 1.00 |
| 12.60    | 1   | . . |                             |        |        |        |      |
| ATOM 949 | C   | C   | . LEU LEU LEU A A 127 127 . | 68.521 | 93.190 | 27.536 | 1.00 |
| 7.17     | 1   | . . |                             |        |        |        |      |
| ATOM 950 | O   | O   | . LEU LEU LEU A A 127 127 . | 68.964 | 92.569 | 26.590 | 1.00 |
| 10.42    | 1   | . . |                             |        |        |        |      |
| ATOM 951 | N   | N   | . PRO PRO PRO A A 128 128 . | 68.944 | 94.413 | 27.847 | 1.00 |
| 6.85     | 1   | . . |                             |        |        |        |      |
| ATOM 952 | CA  | CA  | . PRO PRO PRO A A 128 128 . | 70.134 | 94.932 | 27.136 | 1.00 |
| 6.30     | 1   | . . |                             |        |        |        |      |
| ATOM 953 | CB  | CB  | . PRO PRO PRO A A 128 128 . | 70.372 | 96.278 | 27.785 | 1.00 |
| 6.27     | 1   | . . |                             |        |        |        |      |
| ATOM 954 | CG  | CG  | . PRO PRO PRO A A 128 128 . | 69.250 | 96.573 | 28.655 | 1.00 |
| 6.12     | 1   | . . |                             |        |        |        |      |
| ATOM 955 | CD  | CD  | . PRO PRO PRO A A 128 128 . | 68.424 | 95.332 | 28.866 | 1.00 |
| 5.70     | 1   | . . |                             |        |        |        |      |
| ATOM 956 | C   | C   | . PRO PRO PRO A A 128 128 . | 71.341 | 94.089 | 27.453 | 1.00 |
| 6.17     | 1   | . . |                             |        |        |        |      |
| ATOM 957 | O   | O   | . PRO PRO PRO A A 128 128 . | 71.472 | 93.535 | 28.573 | 1.00 |
| 5.45     | 1   | . . |                             |        |        |        |      |
| ATOM 958 | N   | N   | . LEU LEU LEU A A 129 129 . | 72.301 | 94.093 | 26.553 | 1.00 |
| 4.09     | 1   | . . |                             |        |        |        |      |
| ATOM 959 | CA  | CA  | . LEU LEU LEU A A 129 129 . | 73.498 | 93.204 | 26.715 | 1.00 |
| 4.30     | 1   | . . |                             |        |        |        |      |
| ATOM 960 | CB  | CB  | . LEU LEU LEU A A 129 129 . | 74.406 | 93.346 | 25.496 | 1.00 |
| 5.27     | 1   | . . |                             |        |        |        |      |



|          |     |     |                             |        |        |        |      |
|----------|-----|-----|-----------------------------|--------|--------|--------|------|
| ATOM 961 | CG  | CG  | . LEU LEU LEU A A 129 129 . | 75.732 | 92.593 | 25.499 | 1.00 |
| 2.65     | 1   | . . |                             |        |        |        |      |
| ATOM 962 | CD1 | CD1 | . LEU LEU LEU A A 129 129 . | 75.540 | 91.043 | 25.689 | 1.00 |
| 3.68     | 1   | . . |                             |        |        |        |      |
| ATOM 963 | CD2 | CD2 | . LEU LEU LEU A A 129 129 . | 76.486 | 92.953 | 24.194 | 1.00 |
| 3.86     | 1   | . . |                             |        |        |        |      |
| ATOM 964 | C   | C   | . LEU LEU LEU A A 129 129 . | 74.299 | 93.457 | 28.019 | 1.00 |
| 4.82     | 1   | . . |                             |        |        |        |      |
| ATOM 965 | O   | O   | . LEU LEU LEU A A 129 129 . | 74.706 | 92.542 | 28.761 | 1.00 |
| 4.45     | 1   | . . |                             |        |        |        |      |
| ATOM 966 | N   | N   | . TYR TYR TYR A A 130 130 . | 74.427 | 94.740 | 28.339 | 1.00 |
| 4.75     | 1   | . . |                             |        |        |        |      |
| ATOM 967 | CA  | CA  | . TYR TYR TYR A A 130 130 . | 75.135 | 95.073 | 29.571 | 1.00 |
| 3.69     | 1   | . . |                             |        |        |        |      |
| ATOM 968 | CB  | CB  | . TYR TYR TYR A A 130 130 . | 75.353 | 96.608 | 29.779 | 1.00 |
| 2.74     | 1   | . . |                             |        |        |        |      |
| ATOM 969 | CG  | CG  | . TYR TYR TYR A A 130 130 . | 74.086 | 97.440 | 29.881 | 1.00 |
| 3.08     | 1   | . . |                             |        |        |        |      |
| ATOM 970 | CD1 | CD1 | . TYR TYR TYR A A 130 130 . | 73.418 | 97.579 | 31.087 | 1.00 |
| 3.82     | 1   | . . |                             |        |        |        |      |
| ATOM 971 | CE1 | CE1 | . TYR TYR TYR A A 130 130 . | 72.295 | 98.332 | 31.183 | 1.00 |
| 5.32     | 1   | . . |                             |        |        |        |      |
| ATOM 972 | CZ  | CZ  | . TYR TYR TYR A A 130 130 . | 71.795 | 98.956 | 30.077 | 1.00 |
| 7.87     | 1   | . . |                             |        |        |        |      |
| ATOM 973 | OH  | OH  | . TYR TYR TYR A A 130 130 . | 70.651 | 99.622 | 30.250 | 1.00 |
| 10.13    | 1   | . . |                             |        |        |        |      |
| ATOM 974 | CE2 | CE2 | . TYR TYR TYR A A 130 130 . | 72.410 | 98.833 | 28.846 | 1.00 |
| 5.37     | 1   | . . |                             |        |        |        |      |
| ATOM 975 | CD2 | CD2 | . TYR TYR TYR A A 130 130 . | 73.539 | 98.019 | 28.760 | 1.00 |
| 4.22     | 1   | . . |                             |        |        |        |      |
| ATOM 976 | C   | C   | . TYR TYR TYR A A 130 130 . | 74.426 | 94.496 | 30.778 | 1.00 |
| 3.72     | 1   | . . |                             |        |        |        |      |
| ATOM 977 | O   | O   | . TYR TYR TYR A A 130 130 . | 75.057 | 94.082 | 31.737 | 1.00 |
| 5.01     | 1   | . . |                             |        |        |        |      |
| ATOM 978 | N   | N   | . ARG ARG ARG A A 131 131 . | 73.119 | 94.418 | 30.752 | 1.00 |
| 6.95     | 1   | . . |                             |        |        |        |      |
| ATOM 979 | CA  | CA  | . ARG ARG ARG A A 131 131 . | 72.373 | 93.880 | 31.910 | 1.00 |
| 5.95     | 1   | . . |                             |        |        |        |      |
| ATOM 980 | CB  | CB  | . ARG ARG ARG A A 131 131 . | 70.919 | 94.280 | 31.763 | 1.00 |
| 7.32     | 1   | . . |                             |        |        |        |      |
| ATOM 981 | CG  | CG  | . ARG ARG ARG A A 131 131 . | 70.623 | 95.513 | 32.542 | 1.00 |
| 14.23    | 1   | . . |                             |        |        |        |      |
| ATOM 982 | CD  | CD  | . ARG ARG ARG A A 131 131 . | 70.379 | 95.180 | 33.977 | 1.00 |
| 21.03    | 1   | . . |                             |        |        |        |      |
| ATOM 983 | NE  | NE  | . ARG ARG ARG A A 131 131 . | 70.239 | 96.395 | 34.745 | 1.00 |
| 24.22    | 1   | . . |                             |        |        |        |      |
| ATOM 984 | CZ  | CZ  | . ARG ARG ARG A A 131 131 . | 70.715 | 96.564 | 35.970 | 1.00 |
| 24.52    | 1   | . . |                             |        |        |        |      |
| ATOM 985 | NH1 | NH1 | . ARG ARG ARG A A 131 131 . | 71.392 | 95.596 | 36.583 | 1.00 |
| 20.74    | 1   | . . |                             |        |        |        |      |
| ATOM 986 | NH2 | NH2 | . ARG ARG ARG A A 131 131 . | 70.535 | 97.728 | 36.571 | 1.00 |
| 25.59    | 1   | . . |                             |        |        |        |      |
| ATOM 987 | C   | C   | . ARG ARG ARG A A 131 131 . | 72.490 | 92.346 | 31.990 | 1.00 |
| 6.60     | 1   | . . |                             |        |        |        |      |

|           |     |     |                             |        |        |        |      |
|-----------|-----|-----|-----------------------------|--------|--------|--------|------|
| ATOM 988  | O   | O   | . ARG ARG ARG A A 131 131 . | 72.605 | 91.746 | 33.072 | 1.00 |
| 6.95      | 1   | . . |                             |        |        |        |      |
| ATOM 989  | N   | N   | . HIS HIS HIS A A 132 132 . | 72.429 | 91.712 | 30.816 | 1.00 |
| 5.60      | 1   | . . |                             |        |        |        |      |
| ATOM 990  | CA  | CA  | . HIS HIS HIS A A 132 132 . | 72.613 | 90.261 | 30.750 | 1.00 |
| 4.87      | 1   | . . |                             |        |        |        |      |
| ATOM 991  | CB  | CB  | . HIS HIS HIS A A 132 132 . | 72.401 | 89.787 | 29.305 | 1.00 |
| 4.91      | 1   | . . |                             |        |        |        |      |
| ATOM 992  | CG  | CG  | . HIS HIS HIS A A 132 132 . | 72.647 | 88.326 | 29.073 | 1.00 |
| 6.95      | 1   | . . |                             |        |        |        |      |
| ATOM 993  | ND1 | ND1 | . HIS HIS HIS A A 132 132 . | 72.070 | 87.350 | 29.857 | 1.00 |
| 7.63      | 1   | . . |                             |        |        |        |      |
| ATOM 994  | CE1 | CE1 | . HIS HIS HIS A A 132 132 . | 72.444 | 86.157 | 29.427 | 1.00 |
| 7.80      | 1   | . . |                             |        |        |        |      |
| ATOM 995  | NE2 | NE2 | . HIS HIS HIS A A 132 132 . | 73.274 | 86.317 | 28.410 | 1.00 |
| 6.60      | 1   | . . |                             |        |        |        |      |
| ATOM 996  | CD2 | CD2 | . HIS HIS HIS A A 132 132 . | 73.435 | 87.670 | 28.181 | 1.00 |
| 4.55      | 1   | . . |                             |        |        |        |      |
| ATOM 997  | C   | C   | . HIS HIS HIS A A 132 132 . | 73.990 | 89.856 | 31.288 | 1.00 |
| 3.19      | 1   | . . |                             |        |        |        |      |
| ATOM 998  | O   | O   | . HIS HIS HIS A A 132 132 . | 74.116 | 88.944 | 32.099 | 1.00 |
| 4.90      | 1   | . . |                             |        |        |        |      |
| ATOM 999  | N   | N   | . ILE ILE ILE A A 133 133 . | 75.027 | 90.572 | 30.839 | 1.00 |
| 3.85      | 1   | . . |                             |        |        |        |      |
| ATOM 1000 | CA  | CA  | . ILE ILE ILE A A 133 133 . | 76.344 | 90.391 | 31.351 | 1.00 |
| 2.89      | 1   | . . |                             |        |        |        |      |
| ATOM 1001 | CB  | CB  | . ILE ILE ILE A A 133 133 . | 77.377 | 91.302 | 30.633 | 1.00 |
| 3.80      | 1   | . . |                             |        |        |        |      |
| ATOM 1002 | CG1 | CG1 | . ILE ILE ILE A A 133 133 . | 77.523 | 90.750 | 29.232 | 1.00 |
| 3.21      | 1   | . . |                             |        |        |        |      |
| ATOM 1003 | CD1 | CD1 | . ILE ILE ILE A A 133 133 . | 78.290 | 91.606 | 28.315 | 1.00 |
| 3.08      | 1   | . . |                             |        |        |        |      |
| ATOM 1004 | CG2 | CG2 | . ILE ILE ILE A A 133 133 . | 78.755 | 91.305 | 31.371 | 1.00 |
| 2.80      | 1   | . . |                             |        |        |        |      |
| ATOM 1005 | C   | C   | . ILE ILE ILE A A 133 133 . | 76.431 | 90.551 | 32.871 | 1.00 |
| 3.51      | 1   | . . |                             |        |        |        |      |
| ATOM 1006 | O   | O   | . ILE ILE ILE A A 133 133 . | 77.090 | 89.668 | 33.536 | 1.00 |
| 3.52      | 1   | . . |                             |        |        |        |      |
| ATOM 1007 | N   | N   | . ALA ALA ALA A A 134 134 . | 75.791 | 91.638 | 33.358 | 1.00 |
| 5.13      | 1   | . . |                             |        |        |        |      |
| ATOM 1008 | CA  | CA  | . ALA ALA ALA A A 134 134 . | 75.689 | 91.879 | 34.780 | 1.00 |
| 5.45      | 1   | . . |                             |        |        |        |      |
| ATOM 1009 | CB  | CB  | . ALA ALA ALA A A 134 134 . | 74.768 | 93.015 | 35.019 | 1.00 |
| 6.41      | 1   | . . |                             |        |        |        |      |
| ATOM 1010 | C   | C   | . ALA ALA ALA A A 134 134 . | 75.203 | 90.629 | 35.487 | 1.00 |
| 5.59      | 1   | . . |                             |        |        |        |      |
| ATOM 1011 | O   | O   | . ALA ALA ALA A A 134 134 . | 75.821 | 90.199 | 36.472 | 1.00 |
| 5.88      | 1   | . . |                             |        |        |        |      |
| ATOM 1012 | N   | N   | . GLN GLN GLN A A 135 135 . | 74.103 | 90.042 | 34.976 | 1.00 |
| 6.16      | 1   | . . |                             |        |        |        |      |
| ATOM 1013 | CA  | CA  | . GLN GLN GLN A A 135 135 . | 73.550 | 88.812 | 35.625 | 1.00 |
| 7.03      | 1   | . . |                             |        |        |        |      |
| ATOM 1014 | CB  | CB  | . GLN GLN GLN A A 135 135 . | 72.177 | 88.497 | 35.015 | 1.00 |
| 7.98      | 1   | . . |                             |        |        |        |      |

|           |       |     |                             |        |        |        |      |
|-----------|-------|-----|-----------------------------|--------|--------|--------|------|
| ATOM 1015 | CG    | CG  | . GLN GLN GLN A A 135 135 . | 71.065 | 89.604 | 35.395 | 1.00 |
| 7.98      | 1 . . |     |                             |        |        |        |      |
| ATOM 1016 | CD    | CD  | . GLN GLN GLN A A 135 135 . | 69.643 | 89.323 | 34.849 | 1.00 |
| 14.73     | 1 . . |     |                             |        |        |        |      |
| ATOM 1017 | OE1   | OE1 | . GLN GLN GLN A A 135 135 . | 68.684 | 90.021 | 35.230 | 1.00 |
| 20.23     | 1 . . |     |                             |        |        |        |      |
| ATOM 1018 | NE2   | NE2 | . GLN GLN GLN A A 135 135 . | 69.485 | 88.276 | 34.006 | 1.00 |
| 14.01     | 1 . . |     |                             |        |        |        |      |
| ATOM 1019 | C     | C   | . GLN GLN GLN A A 135 135 . | 74.536 | 87.623 | 35.570 | 1.00 |
| 8.18      | 1 . . |     |                             |        |        |        |      |
| ATOM 1020 | O     | O   | . GLN GLN GLN A A 135 135 . | 74.702 | 86.874 | 36.555 | 1.00 |
| 9.63      | 1 . . |     |                             |        |        |        |      |
| ATOM 1021 | N     | N   | . LEU LEU LEU A A 136 136 . | 75.189 | 87.437 | 34.430 | 1.00 |
| 7.94      | 1 . . |     |                             |        |        |        |      |
| ATOM 1022 | CA    | CA  | . LEU LEU LEU A A 136 136 . | 76.194 | 86.372 | 34.310 | 1.00 |
| 6.09      | 1 . . |     |                             |        |        |        |      |
| ATOM 1023 | CB    | CB  | . LEU LEU LEU A A 136 136 . | 76.834 | 86.392 | 32.903 | 1.00 |
| 5.75      | 1 . . |     |                             |        |        |        |      |
| ATOM 1024 | CG    | CG  | . LEU LEU LEU A A 136 136 . | 75.879 | 85.925 | 31.781 | 1.00 |
| 5.77      | 1 . . |     |                             |        |        |        |      |
| ATOM 1025 | CD1   | CD1 | . LEU LEU LEU A A 136 136 . | 76.584 | 85.967 | 30.416 | 1.00 |
| 4.29      | 1 . . |     |                             |        |        |        |      |
| ATOM 1026 | CD2   | CD2 | . LEU LEU LEU A A 136 136 . | 75.229 | 84.512 | 32.005 | 1.00 |
| 7.60      | 1 . . |     |                             |        |        |        |      |
| ATOM 1027 | C     | C   | . LEU LEU LEU A A 136 136 . | 77.310 | 86.504 | 35.352 | 1.00 |
| 7.50      | 1 . . |     |                             |        |        |        |      |
| ATOM 1028 | O     | O   | . LEU LEU LEU A A 136 136 . | 77.816 | 85.537 | 35.872 | 1.00 |
| 8.81      | 1 . . |     |                             |        |        |        |      |
| ATOM 1029 | N     | N   | . ALA ALA ALA A A 137 137 . | 77.653 | 87.748 | 35.663 | 1.00 |
| 7.76      | 1 . . |     |                             |        |        |        |      |
| ATOM 1030 | CA    | CA  | . ALA ALA ALA A A 137 137 . | 78.759 | 88.028 | 36.544 | 1.00 |
| 8.90      | 1 . . |     |                             |        |        |        |      |
| ATOM 1031 | CB    | CB  | . ALA ALA ALA A A 137 137 . | 79.566 | 89.247 | 36.008 | 1.00 |
| 6.50      | 1 . . |     |                             |        |        |        |      |
| ATOM 1032 | C     | C   | . ALA ALA ALA A A 137 137 . | 78.329 | 88.202 | 37.990 | 1.00 |
| 9.97      | 1 . . |     |                             |        |        |        |      |
| ATOM 1033 | O     | O   | . ALA ALA ALA A A 137 137 . | 79.174 | 88.294 | 38.871 | 1.00 |
| 12.06     | 1 . . |     |                             |        |        |        |      |
| ATOM 1034 | N     | N   | . GLY GLY GLY A A 138 138 . | 77.014 | 88.138 | 38.214 | 1.00 |
| 10.95     | 1 . . |     |                             |        |        |        |      |
| ATOM 1035 | CA    | CA  | . GLY GLY GLY A A 138 138 . | 76.415 | 88.412 | 39.530 | 1.00 |
| 13.16     | 1 . . |     |                             |        |        |        |      |
| ATOM 1036 | C     | C   | . GLY GLY GLY A A 138 138 . | 76.439 | 89.840 | 40.059 | 1.00 |
| 13.85     | 1 . . |     |                             |        |        |        |      |
| ATOM 1037 | O     | O   | . GLY GLY GLY A A 138 138 . | 76.453 | 90.061 | 41.279 | 1.00 |
| 12.59     | 1 . . |     |                             |        |        |        |      |
| ATOM 1038 | N     | N   | . ASN ASN ASN A A 139 139 . | 76.397 | 90.831 | 39.152 | 1.00 |
| 14.52     | 1 . . |     |                             |        |        |        |      |
| ATOM 1039 | CA    | CA  | . ASN ASN ASN A A 139 139 . | 76.288 | 92.235 | 39.563 | 1.00 |
| 14.78     | 1 . . |     |                             |        |        |        |      |
| ATOM 1040 | CB    | CB  | . ASN ASN ASN A A 139 139 . | 77.293 | 93.095 | 38.779 | 1.00 |
| 15.58     | 1 . . |     |                             |        |        |        |      |
| ATOM 1041 | CG    | CG  | . ASN ASN ASN A A 139 139 . | 78.711 | 92.534 | 38.829 | 1.00 |
| 15.71     | 1 . . |     |                             |        |        |        |      |

|           |       |     |                             |        |         |        |      |
|-----------|-------|-----|-----------------------------|--------|---------|--------|------|
| ATOM 1042 | OD1   | OD1 | . ASN ASN ASN A A 139 139 . | 79.138 | 91.937  | 39.841 | 1.00 |
| 17.19     | 1 . . |     |                             |        |         |        |      |
| ATOM 1043 | ND2   | ND2 | . ASN ASN ASN A A 139 139 . | 79.442 | 92.692  | 37.719 | 1.00 |
| 7.60      | 1 . . |     |                             |        |         |        |      |
| ATOM 1044 | C     | C   | . ASN ASN ASN A A 139 139 . | 74.859 | 92.793  | 39.434 | 1.00 |
| 15.99     | 1 . . |     |                             |        |         |        |      |
| ATOM 1045 | O     | O   | . ASN ASN ASN A A 139 139 . | 74.031 | 92.252  | 38.700 | 1.00 |
| 15.74     | 1 . . |     |                             |        |         |        |      |
| ATOM 1046 | N     | N   | . SER SER SER A A 140 140 . | 74.554 | 93.866  | 40.168 | 1.00 |
| 17.28     | 1 . . |     |                             |        |         |        |      |
| ATOM 1047 | CA    | CA  | . SER SER SER A A 140 140 . | 73.257 | 94.576  | 40.042 | 1.00 |
| 18.96     | 1 . . |     |                             |        |         |        |      |
| ATOM 1048 | CB    | CB  | . SER SER SER A A 140 140 . | 72.377 | 94.335  | 41.266 | 1.00 |
| 19.12     | 1 . . |     |                             |        |         |        |      |
| ATOM 1049 | OG    | OG  | . SER SER SER A A 140 140 . | 73.030 | 93.513  | 42.222 | 1.00 |
| 24.58     | 1 . . |     |                             |        |         |        |      |
| ATOM 1050 | C     | C   | . SER SER SER A A 140 140 . | 73.376 | 96.076  | 39.800 | 1.00 |
| 19.00     | 1 . . |     |                             |        |         |        |      |
| ATOM 1051 | O     | O   | . SER SER SER A A 140 140 . | 72.524 | 96.671  | 39.130 | 1.00 |
| 19.80     | 1 . . |     |                             |        |         |        |      |
| ATOM 1052 | N     | N   | . ASP ASP ASP A A 141 141 . | 74.468 | 96.670  | 40.271 | 1.00 |
| 18.26     | 1 . . |     |                             |        |         |        |      |
| ATOM 1053 | CA    | CA  | . ASP ASP ASP A A 141 141 . | 74.576 | 98.111  | 40.359 | 1.00 |
| 18.90     | 1 . . |     |                             |        |         |        |      |
| ATOM 1054 | CB    | CB  | . ASP ASP ASP A A 141 141 . | 74.861 | 98.585  | 41.801 | 1.00 |
| 19.38     | 1 . . |     |                             |        |         |        |      |
| ATOM 1055 | CG    | CG  | . ASP ASP ASP A A 141 141 . | 73.767 | 98.166  | 42.770 | 1.00 |
| 23.00     | 1 . . |     |                             |        |         |        |      |
| ATOM 1056 | OD1   | OD1 | . ASP ASP ASP A A 141 141 . | 74.043 | 98.010  | 43.989 | 1.00 |
| 27.80     | 1 . . |     |                             |        |         |        |      |
| ATOM 1057 | OD2   | OD2 | . ASP ASP ASP A A 141 141 . | 72.618 | 97.970  | 42.314 | 1.00 |
| 27.47     | 1 . . |     |                             |        |         |        |      |
| ATOM 1058 | C     | C   | . ASP ASP ASP A A 141 141 . | 75.654 | 98.513  | 39.371 | 1.00 |
| 16.98     | 1 . . |     |                             |        |         |        |      |
| ATOM 1059 | O     | O   | . ASP ASP ASP A A 141 141 . | 76.839 | 98.439  | 39.645 | 1.00 |
| 19.33     | 1 . . |     |                             |        |         |        |      |
| ATOM 1060 | N     | N   | . LEU LEU LEU A A 142 142 . | 75.225 | 98.921  | 38.190 | 1.00 |
| 13.73     | 1 . . |     |                             |        |         |        |      |
| ATOM 1061 | CA    | CA  | . LEU LEU LEU A A 142 142 . | 76.165 | 99.076  | 37.098 | 1.00 |
| 10.26     | 1 . . |     |                             |        |         |        |      |
| ATOM 1062 | CB    | CB  | . LEU LEU LEU A A 142 142 . | 75.371 | 99.003  | 35.828 | 1.00 |
| 9.33      | 1 . . |     |                             |        |         |        |      |
| ATOM 1063 | CG    | CG  | . LEU LEU LEU A A 142 142 . | 74.384 | 97.855  | 35.789 | 1.00 |
| 11.33     | 1 . . |     |                             |        |         |        |      |
| ATOM 1064 | CD1   | CD1 | . LEU LEU LEU A A 142 142 . | 73.286 | 98.075  | 34.739 | 1.00 |
| 15.83     | 1 . . |     |                             |        |         |        |      |
| ATOM 1065 | CD2   | CD2 | . LEU LEU LEU A A 142 142 . | 75.125 | 96.569  | 35.474 | 1.00 |
| 11.68     | 1 . . |     |                             |        |         |        |      |
| ATOM 1066 | C     | C   | . LEU LEU LEU A A 142 142 . | 76.887 | 100.411 | 37.172 | 1.00 |
| 7.71      | 1 . . |     |                             |        |         |        |      |
| ATOM 1067 | O     | O   | . LEU LEU LEU A A 142 142 . | 76.393 | 101.385 | 37.732 | 1.00 |
| 8.93      | 1 . . |     |                             |        |         |        |      |
| ATOM 1068 | N     | N   | . ILE ILE ILE A A 143 143 . | 78.063 | 100.493 | 36.599 | 1.00 |
| 5.91      | 1 . . |     |                             |        |         |        |      |

|           |       |     |                   |         |          |         |        |      |
|-----------|-------|-----|-------------------|---------|----------|---------|--------|------|
| ATOM 1069 | CA    | CA  | . ILE ILE ILE A A | 143 143 | . 78.702 | 101.771 | 36.582 | 1.00 |
| 6.33      | 1 . . |     |                   |         |          |         |        |      |
| ATOM 1070 | CB    | CB  | . ILE ILE ILE A A | 143 143 | . 79.768 | 101.989 | 37.657 | 1.00 |
| 10.14     | 1 . . |     |                   |         |          |         |        |      |
| ATOM 1071 | CG1   | CG1 | . ILE ILE ILE A A | 143 143 | . 80.998 | 101.187 | 37.331 | 1.00 |
| 10.33     | 1 . . |     |                   |         |          |         |        |      |
| ATOM 1072 | CD1   | CD1 | . ILE ILE ILE A A | 143 143 | . 82.155 | 102.049 | 37.168 | 1.00 |
| 12.67     | 1 . . |     |                   |         |          |         |        |      |
| ATOM 1073 | CG2   | CG2 | . ILE ILE ILE A A | 143 143 | . 79.236 | 101.908 | 39.143 | 1.00 |
| 10.92     | 1 . . |     |                   |         |          |         |        |      |
| ATOM 1074 | C     | C   | . ILE ILE ILE A A | 143 143 | . 79.361 | 102.084 | 35.227 | 1.00 |
| 4.03      | 1 . . |     |                   |         |          |         |        |      |
| ATOM 1075 | O     | O   | . ILE ILE ILE A A | 143 143 | . 79.822 | 101.174 | 34.501 | 1.00 |
| 4.27      | 1 . . |     |                   |         |          |         |        |      |
| ATOM 1076 | N     | N   | . LEU LEU LEU A A | 144 144 | . 79.422 | 103.355 | 34.951 | 1.00 |
| 3.35      | 1 . . |     |                   |         |          |         |        |      |
| ATOM 1077 | CA    | CA  | . LEU LEU LEU A A | 144 144 | . 80.071 | 103.830 | 33.697 | 1.00 |
| 2.24      | 1 . . |     |                   |         |          |         |        |      |
| ATOM 1078 | CB    | CB  | . LEU LEU LEU A A | 144 144 | . 79.424 | 105.097 | 33.149 | 1.00 |
| 2.69      | 1 . . |     |                   |         |          |         |        |      |
| ATOM 1079 | CG    | CG  | . LEU LEU LEU A A | 144 144 | . 78.251 | 105.030 | 32.194 | 1.00 |
| 3.78      | 1 . . |     |                   |         |          |         |        |      |
| ATOM 1080 | CD1   | CD1 | . LEU LEU LEU A A | 144 144 | . 78.498 | 104.288 | 30.877 | 1.00 |
| 4.95      | 1 . . |     |                   |         |          |         |        |      |
| ATOM 1081 | CD2   | CD2 | . LEU LEU LEU A A | 144 144 | . 77.133 | 104.202 | 32.894 | 1.00 |
| 7.05      | 1 . . |     |                   |         |          |         |        |      |
| ATOM 1082 | C     | C   | . LEU LEU LEU A A | 144 144 | . 81.541 | 104.044 | 33.971 | 1.00 |
| 2.41      | 1 . . |     |                   |         |          |         |        |      |
| ATOM 1083 | O     | O   | . LEU LEU LEU A A | 144 144 | . 81.922 | 104.658 | 34.961 | 1.00 |
| 5.16      | 1 . . |     |                   |         |          |         |        |      |
| ATOM 1084 | N     | N   | . PRO PRO PRO A A | 145 145 | . 82.405 | 103.451 | 33.155 | 1.00 |
| 2.16      | 1 . . |     |                   |         |          |         |        |      |
| ATOM 1085 | CA    | CA  | . PRO PRO PRO A A | 145 145 | . 83.833 | 103.547 | 33.423 | 1.00 |
| 2.09      | 1 . . |     |                   |         |          |         |        |      |
| ATOM 1086 | CB    | CB  | . PRO PRO PRO A A | 145 145 | . 84.417 | 102.487 | 32.446 | 1.00 |
| 2.05      | 1 . . |     |                   |         |          |         |        |      |
| ATOM 1087 | CG    | CG  | . PRO PRO PRO A A | 145 145 | . 83.515 | 102.604 | 31.257 | 1.00 |
| 2.50      | 1 . . |     |                   |         |          |         |        |      |
| ATOM 1088 | CD    | CD  | . PRO PRO PRO A A | 145 145 | . 82.099 | 102.779 | 31.864 | 1.00 |
| 2.31      | 1 . . |     |                   |         |          |         |        |      |
| ATOM 1089 | C     | C   | . PRO PRO PRO A A | 145 145 | . 84.474 | 104.873 | 33.086 | 1.00 |
| 2.14      | 1 . . |     |                   |         |          |         |        |      |
| ATOM 1090 | O     | O   | . PRO PRO PRO A A | 145 145 | . 83.965 | 105.602 | 32.219 | 1.00 |
| 2.36      | 1 . . |     |                   |         |          |         |        |      |
| ATOM 1091 | N     | N   | . VAL VAL VAL A A | 146 146 | . 85.626 | 105.156 | 33.655 | 1.00 |
| 2.51      | 1 . . |     |                   |         |          |         |        |      |
| ATOM 1092 | CA    | CA  | . VAL VAL VAL A A | 146 146 | . 86.447 | 106.193 | 33.057 | 1.00 |
| 2.53      | 1 . . |     |                   |         |          |         |        |      |
| ATOM 1093 | CB    | CB  | . VAL VAL VAL A A | 146 146 | . 87.535 | 106.636 | 34.041 | 1.00 |
| 2.86      | 1 . . |     |                   |         |          |         |        |      |
| ATOM 1094 | CG1   | CG1 | . VAL VAL VAL A A | 146 146 | . 88.490 | 107.643 | 33.431 | 1.00 |
| 2.94      | 1 . . |     |                   |         |          |         |        |      |
| ATOM 1095 | CG2   | CG2 | . VAL VAL VAL A A | 146 146 | . 86.897 | 107.133 | 35.406 | 1.00 |
| 2.92      | 1 . . |     |                   |         |          |         |        |      |

















|           |       |     |                   |         |          |         |        |      |
|-----------|-------|-----|-------------------|---------|----------|---------|--------|------|
| ATOM 1285 | CB    | CB  | . VAL VAL VAL A A | 172 172 | . 89.789 | 110.702 | 37.193 | 1.00 |
| 4.22      | 1 . . |     |                   |         |          |         |        |      |
| ATOM 1286 | CG1   | CG1 | . VAL VAL VAL A A | 172 172 | . 90.559 | 109.468 | 36.719 | 1.00 |
| 2.40      | 1 . . |     |                   |         |          |         |        |      |
| ATOM 1287 | CG2   | CG2 | . VAL VAL VAL A A | 172 172 | . 90.824 | 111.849 | 37.332 | 1.00 |
| 4.10      | 1 . . |     |                   |         |          |         |        |      |
| ATOM 1288 | C     | C   | . VAL VAL VAL A A | 172 172 | . 87.792 | 112.105 | 36.757 | 1.00 |
| 2.18      | 1 . . |     |                   |         |          |         |        |      |
| ATOM 1289 | O     | O   | . VAL VAL VAL A A | 172 172 | . 86.827 | 111.801 | 37.529 | 1.00 |
| 3.66      | 1 . . |     |                   |         |          |         |        |      |
| ATOM 1290 | N     | N   | . GLY GLY GLY A A | 173 173 | . 88.060 | 113.362 | 36.409 | 1.00 |
| 2.42      | 1 . . |     |                   |         |          |         |        |      |
| ATOM 1291 | CA    | CA  | . GLY GLY GLY A A | 173 173 | . 87.267 | 114.512 | 36.969 | 1.00 |
| 2.78      | 1 . . |     |                   |         |          |         |        |      |
| ATOM 1292 | C     | C   | . GLY GLY GLY A A | 173 173 | . 86.031 | 114.935 | 36.188 | 1.00 |
| 2.64      | 1 . . |     |                   |         |          |         |        |      |
| ATOM 1293 | O     | O   | . GLY GLY GLY A A | 173 173 | . 85.354 | 115.921 | 36.456 | 1.00 |
| 4.63      | 1 . . |     |                   |         |          |         |        |      |
| ATOM 1294 | N     | N   | . ALA ALA ALA A A | 174 174 | . 85.736 | 114.184 | 35.156 | 1.00 |
| 3.58      | 1 . . |     |                   |         |          |         |        |      |
| ATOM 1295 | CA    | CA  | . ALA ALA ALA A A | 174 174 | . 84.534 | 114.412 | 34.347 | 1.00 |
| 2.80      | 1 . . |     |                   |         |          |         |        |      |
| ATOM 1296 | CB    | CB  | . ALA ALA ALA A A | 174 174 | . 84.567 | 113.487 | 33.109 | 1.00 |
| 4.08      | 1 . . |     |                   |         |          |         |        |      |
| ATOM 1297 | C     | C   | . ALA ALA ALA A A | 174 174 | . 83.256 | 114.233 | 35.126 | 1.00 |
| 2.92      | 1 . . |     |                   |         |          |         |        |      |
| ATOM 1298 | O     | O   | . ALA ALA ALA A A | 174 174 | . 83.189 | 113.527 | 36.126 | 1.00 |
| 4.02      | 1 . . |     |                   |         |          |         |        |      |
| ATOM 1299 | N     | N   | . GLU GLU GLU A A | 175 175 | . 82.205 | 114.899 | 34.719 | 1.00 |
| 4.50      | 1 . . |     |                   |         |          |         |        |      |
| ATOM 1300 | CA    | CA  | . GLU GLU GLU A A | 175 175 | . 80.910 | 114.772 | 35.428 | 1.00 |
| 6.75      | 1 . . |     |                   |         |          |         |        |      |
| ATOM 1301 | CB    | CB  | . GLU GLU GLU A A | 175 175 | . 80.024 | 115.982 | 35.098 | 1.00 |
| 8.52      | 1 . . |     |                   |         |          |         |        |      |
| ATOM 1302 | CG    | CG  | . GLU GLU GLU A A | 175 175 | . 80.346 | 117.187 | 35.954 | 1.00 |
| 17.96     | 1 . . |     |                   |         |          |         |        |      |
| ATOM 1303 | CD    | CD  | . GLU GLU GLU A A | 175 175 | . 79.942 | 116.925 | 37.385 | 1.00 |
| 27.15     | 1 . . |     |                   |         |          |         |        |      |
| ATOM 1304 | OE1   | OE1 | . GLU GLU GLU A A | 175 175 | . 80.849 | 116.555 | 38.174 | 1.00 |
| 32.88     | 1 . . |     |                   |         |          |         |        |      |
| ATOM 1305 | OE2   | OE2 | . GLU GLU GLU A A | 175 175 | . 78.718 | 117.003 | 37.696 | 1.00 |
| 29.69     | 1 . . |     |                   |         |          |         |        |      |
| ATOM 1306 | C     | C   | . GLU GLU GLU A A | 175 175 | . 80.108 | 113.476 | 35.107 | 1.00 |
| 6.99      | 1 . . |     |                   |         |          |         |        |      |
| ATOM 1307 | O     | O   | . GLU GLU GLU A A | 175 175 | . 79.214 | 113.058 | 35.840 | 1.00 |
| 7.74      | 1 . . |     |                   |         |          |         |        |      |
| ATOM 1308 | N     | N   | . SER SER SER A A | 176 176 | . 80.435 | 112.849 | 33.983 | 1.00 |
| 6.03      | 1 . . |     |                   |         |          |         |        |      |
| ATOM 1309 | CA    | CA  | . SER SER SER A A | 176 176 | . 79.558 | 111.751 | 33.430 | 1.00 |
| 3.53      | 1 . . |     |                   |         |          |         |        |      |
| ATOM 1310 | CB    | CB  | . SER SER SER A A | 176 176 | . 78.255 | 112.222 | 32.768 | 1.00 |
| 5.03      | 1 . . |     |                   |         |          |         |        |      |
| ATOM 1311 | OG    | OG  | . SER SER SER A A | 176 176 | . 78.463 | 113.097 | 31.683 | 1.00 |
| 4.70      | 1 . . |     |                   |         |          |         |        |      |

|           |     |       |                   |         |          |         |        |      |
|-----------|-----|-------|-------------------|---------|----------|---------|--------|------|
| ATOM 1312 | C   | C     | . SER SER SER A A | 176 176 | . 80.386 | 111.094 | 32.337 | 1.00 |
| 2.86      | 1   | . . . |                   |         |          |         |        |      |
| ATOM 1313 | O   | O     | . SER SER SER A A | 176 176 | . 81.478 | 111.580 | 32.001 | 1.00 |
| 2.54      | 1   | . . . |                   |         |          |         |        |      |
| ATOM 1314 | N   | N     | . PHE PHE PHE A A | 177 177 | . 79.879 | 110.035 | 31.736 | 1.00 |
| 2.00      | 1   | . . . |                   |         |          |         |        |      |
| ATOM 1315 | CA  | CA    | . PHE PHE PHE A A | 177 177 | . 80.617 | 109.431 | 30.630 | 1.00 |
| 2.71      | 1   | . . . |                   |         |          |         |        |      |
| ATOM 1316 | CB  | CB    | . PHE PHE PHE A A | 177 177 | . 80.102 | 107.974 | 30.308 | 1.00 |
| 3.41      | 1   | . . . |                   |         |          |         |        |      |
| ATOM 1317 | CG  | CG    | . PHE PHE PHE A A | 177 177 | . 80.994 | 107.283 | 29.368 | 1.00 |
| 2.57      | 1   | . . . |                   |         |          |         |        |      |
| ATOM 1318 | CD1 | CD1   | . PHE PHE PHE A A | 177 177 | . 82.181 | 106.666 | 29.816 | 1.00 |
| 5.40      | 1   | . . . |                   |         |          |         |        |      |
| ATOM 1319 | CE1 | CE1   | . PHE PHE PHE A A | 177 177 | . 83.126 | 106.169 | 28.889 | 1.00 |
| 2.68      | 1   | . . . |                   |         |          |         |        |      |
| ATOM 1320 | CZ  | CZ    | . PHE PHE PHE A A | 177 177 | . 82.925 | 106.346 | 27.590 | 1.00 |
| 3.16      | 1   | . . . |                   |         |          |         |        |      |
| ATOM 1321 | CE2 | CE2   | . PHE PHE PHE A A | 177 177 | . 81.769 | 106.919 | 27.127 | 1.00 |
| 2.34      | 1   | . . . |                   |         |          |         |        |      |
| ATOM 1322 | CD2 | CD2   | . PHE PHE PHE A A | 177 177 | . 80.817 | 107.406 | 27.967 | 1.00 |
| 2.10      | 1   | . . . |                   |         |          |         |        |      |
| ATOM 1323 | C   | C     | . PHE PHE PHE A A | 177 177 | . 80.591 | 110.364 | 29.396 | 1.00 |
| 2.12      | 1   | . . . |                   |         |          |         |        |      |
| ATOM 1324 | O   | O     | . PHE PHE PHE A A | 177 177 | . 81.624 | 110.534 | 28.739 | 1.00 |
| 3.04      | 1   | . . . |                   |         |          |         |        |      |
| ATOM 1325 | N   | N     | . ARG ARG ARG A A | 178 178 | . 79.438 | 110.944 | 29.083 | 1.00 |
| 2.25      | 1   | . . . |                   |         |          |         |        |      |
| ATOM 1326 | CA  | CA    | . ARG ARG ARG A A | 178 178 | . 79.268 | 111.856 | 27.975 | 1.00 |
| 2.59      | 1   | . . . |                   |         |          |         |        |      |
| ATOM 1327 | CB  | CB    | . ARG ARG ARG A A | 178 178 | . 77.804 | 112.360 | 27.954 | 1.00 |
| 2.14      | 1   | . . . |                   |         |          |         |        |      |
| ATOM 1328 | CG  | CG    | . ARG ARG ARG A A | 178 178 | . 77.504 | 113.305 | 26.830 | 1.00 |
| 9.06      | 1   | . . . |                   |         |          |         |        |      |
| ATOM 1329 | CD  | CD    | . ARG ARG ARG A A | 178 178 | . 76.074 | 113.744 | 27.027 | 1.00 |
| 16.42     | 1   | . . . |                   |         |          |         |        |      |
| ATOM 1330 | NE  | NE    | . ARG ARG ARG A A | 178 178 | . 75.522 | 114.269 | 25.788 | 1.00 |
| 23.93     | 1   | . . . |                   |         |          |         |        |      |
| ATOM 1331 | CZ  | CZ    | . ARG ARG ARG A A | 178 178 | . 75.533 | 115.553 | 25.471 | 1.00 |
| 23.19     | 1   | . . . |                   |         |          |         |        |      |
| ATOM 1332 | NH1 | NH1   | . ARG ARG ARG A A | 178 178 | . 74.998 | 115.952 | 24.320 | 1.00 |
| 22.79     | 1   | . . . |                   |         |          |         |        |      |
| ATOM 1333 | NH2 | NH2   | . ARG ARG ARG A A | 178 178 | . 76.096 | 116.429 | 26.306 | 1.00 |
| 21.71     | 1   | . . . |                   |         |          |         |        |      |
| ATOM 1334 | C   | C     | . ARG ARG ARG A A | 178 178 | . 80.254 | 113.012 | 28.180 | 1.00 |
| 2.83      | 1   | . . . |                   |         |          |         |        |      |
| ATOM 1335 | O   | O     | . ARG ARG ARG A A | 178 178 | . 80.855 | 113.487 | 27.227 | 1.00 |
| 2.55      | 1   | . . . |                   |         |          |         |        |      |
| ATOM 1336 | N   | N     | . ASP ASP ASP A A | 179 179 | . 80.400 | 113.513 | 29.408 | 1.00 |
| 2.90      | 1   | . . . |                   |         |          |         |        |      |
| ATOM 1337 | CA  | CA    | . ASP ASP ASP A A | 179 179 | . 81.351 | 114.541 | 29.697 | 1.00 |
| 2.49      | 1   | . . . |                   |         |          |         |        |      |
| ATOM 1338 | CB  | CB    | . ASP ASP ASP A A | 179 179 | . 81.103 | 115.105 | 31.098 | 1.00 |
| 3.72      | 1   | . . . |                   |         |          |         |        |      |











|           |     |       |                             |         |         |        |      |
|-----------|-----|-------|-----------------------------|---------|---------|--------|------|
| ATOM 1447 | N   | N     | . GLY GLY GLY A A 193 193 . | 97.329  | 120.218 | 17.683 | 1.00 |
| 2.80      | 1   | . . . |                             |         |         |        |      |
| ATOM 1448 | CA  | CA    | . GLY GLY GLY A A 193 193 . | 97.932  | 121.509 | 17.397 | 1.00 |
| 3.52      | 1   | . . . |                             |         |         |        |      |
| ATOM 1449 | C   | C     | . GLY GLY GLY A A 193 193 . | 99.230  | 121.727 | 18.178 | 1.00 |
| 3.93      | 1   | . . . |                             |         |         |        |      |
| ATOM 1450 | O   | O     | . GLY GLY GLY A A 193 193 . | 100.169 | 122.334 | 17.649 | 1.00 |
| 7.31      | 1   | . . . |                             |         |         |        |      |
| ATOM 1451 | N   | N     | . VAL VAL VAL A A 194 194 . | 99.350  | 121.208 | 19.401 | 1.00 |
| 3.75      | 1   | . . . |                             |         |         |        |      |
| ATOM 1452 | CA  | CA    | . VAL VAL VAL A A 194 194 . | 100.635 | 121.227 | 20.059 | 1.00 |
| 6.03      | 1   | . . . |                             |         |         |        |      |
| ATOM 1453 | CB  | CB    | . VAL VAL VAL A A 194 194 . | 100.507 | 120.645 | 21.490 | 1.00 |
| 4.73      | 1   | . . . |                             |         |         |        |      |
| ATOM 1454 | CG1 | CG1   | . VAL VAL VAL A A 194 194 . | 101.847 | 120.630 | 22.223 | 1.00 |
| 9.29      | 1   | . . . |                             |         |         |        |      |
| ATOM 1455 | CG2 | CG2   | . VAL VAL VAL A A 194 194 . | 99.495  | 121.440 | 22.280 | 1.00 |
| 5.73      | 1   | . . . |                             |         |         |        |      |
| ATOM 1456 | C   | C     | . VAL VAL VAL A A 194 194 . | 101.720 | 120.479 | 19.235 | 1.00 |
| 4.64      | 1   | . . . |                             |         |         |        |      |
| ATOM 1457 | O   | O     | . VAL VAL VAL A A 194 194 . | 102.909 | 120.930 | 19.124 | 1.00 |
| 7.75      | 1   | . . . |                             |         |         |        |      |
| ATOM 1458 | N   | N     | . ILE ILE ILE A A 195 195 . | 101.335 | 119.314 | 18.702 | 1.00 |
| 4.84      | 1   | . . . |                             |         |         |        |      |
| ATOM 1459 | CA  | CA    | . ILE ILE ILE A A 195 195 . | 102.258 | 118.539 | 17.876 | 1.00 |
| 4.75      | 1   | . . . |                             |         |         |        |      |
| ATOM 1460 | CB  | CB    | . ILE ILE ILE A A 195 195 . | 101.694 | 117.102 | 17.617 | 1.00 |
| 4.90      | 1   | . . . |                             |         |         |        |      |
| ATOM 1461 | CG1 | CG1   | . ILE ILE ILE A A 195 195 . | 101.803 | 116.336 | 18.904 | 1.00 |
| 3.82      | 1   | . . . |                             |         |         |        |      |
| ATOM 1462 | CD1 | CD1   | . ILE ILE ILE A A 195 195 . | 101.081 | 114.985 | 18.820 | 1.00 |
| 7.12      | 1   | . . . |                             |         |         |        |      |
| ATOM 1463 | CG2 | CG2   | . ILE ILE ILE A A 195 195 . | 102.512 | 116.377 | 16.510 | 1.00 |
| 5.58      | 1   | . . . |                             |         |         |        |      |
| ATOM 1464 | C   | C     | . ILE ILE ILE A A 195 195 . | 102.584 | 119.235 | 16.558 | 1.00 |
| 3.95      | 1   | . . . |                             |         |         |        |      |
| ATOM 1465 | O   | O     | . ILE ILE ILE A A 195 195 . | 103.752 | 119.314 | 16.120 | 1.00 |
| 4.99      | 1   | . . . |                             |         |         |        |      |
| ATOM 1466 | N   | N     | . LYS LYS LYS A A 196 196 . | 101.539 | 119.746 | 15.927 | 1.00 |
| 5.27      | 1   | . . . |                             |         |         |        |      |
| ATOM 1467 | CA  | CA    | . LYS LYS LYS A A 196 196 . | 101.688 | 120.431 | 14.636 | 1.00 |
| 7.27      | 1   | . . . |                             |         |         |        |      |
| ATOM 1468 | CB  | CB    | . LYS LYS LYS A A 196 196 . | 100.368 | 120.938 | 14.048 | 1.00 |
| 7.60      | 1   | . . . |                             |         |         |        |      |
| ATOM 1469 | CG  | CG    | . LYS LYS LYS A A 196 196 . | 100.480 | 121.543 | 12.635 | 1.00 |
| 12.35     | 1   | . . . |                             |         |         |        |      |
| ATOM 1470 | CD  | CD    | . LYS LYS LYS A A 196 196 . | 99.584  | 122.756 | 12.445 | 1.00 |
| 19.14     | 1   | . . . |                             |         |         |        |      |
| ATOM 1471 | CE  | CE    | . LYS LYS LYS A A 196 196 . | 99.435  | 123.093 | 10.975 | 1.00 |
| 23.41     | 1   | . . . |                             |         |         |        |      |
| ATOM 1472 | NZ  | NZ    | . LYS LYS LYS A A 196 196 . | 99.459  | 124.582 | 10.687 | 1.00 |
| 28.88     | 1   | . . . |                             |         |         |        |      |
| ATOM 1473 | C   | C     | . LYS LYS LYS A A 196 196 . | 102.639 | 121.643 | 14.802 | 1.00 |
| 7.92      | 1   | . . . |                             |         |         |        |      |

|           |       |     |                             |         |         |        |      |
|-----------|-------|-----|-----------------------------|---------|---------|--------|------|
| ATOM 1474 | O     | O   | . LYS LYS LYS A A 196 196 . | 103.556 | 121.811 | 13.990 | 1.00 |
| 7.77      | 1 . . |     |                             |         |         |        |      |
| ATOM 1475 | N     | N   | . ASP ASP ASP A A 197 197 . | 102.435 | 122.437 | 15.856 | 1.00 |
| 9.71      | 1 . . |     |                             |         |         |        |      |
| ATOM 1476 | CA    | CA  | . ASP ASP ASP A A 197 197 . | 103.289 | 123.628 | 16.147 | 1.00 |
| 9.64      | 1 . . |     |                             |         |         |        |      |
| ATOM 1477 | CB    | CB  | . ASP ASP ASP A A 197 197 . | 102.781 | 124.329 | 17.401 | 1.00 |
| 11.43     | 1 . . |     |                             |         |         |        |      |
| ATOM 1478 | CG    | CG  | . ASP ASP ASP A A 197 197 . | 101.532 | 125.143 | 17.162 | 1.00 |
| 14.55     | 1 . . |     |                             |         |         |        |      |
| ATOM 1479 | OD1   | OD1 | . ASP ASP ASP A A 197 197 . | 101.022 | 125.696 | 18.137 | 1.00 |
| 16.98     | 1 . . |     |                             |         |         |        |      |
| ATOM 1480 | OD2   | OD2 | . ASP ASP ASP A A 197 197 . | 101.031 | 125.228 | 16.010 | 1.00 |
| 17.52     | 1 . . |     |                             |         |         |        |      |
| ATOM 1481 | C     | C   | . ASP ASP ASP A A 197 197 . | 104.757 | 123.229 | 16.373 | 1.00 |
| 9.00      | 1 . . |     |                             |         |         |        |      |
| ATOM 1482 | O     | O   | . ASP ASP ASP A A 197 197 . | 105.682 | 123.931 | 15.926 | 1.00 |
| 9.99      | 1 . . |     |                             |         |         |        |      |
| ATOM 1483 | N     | N   | . LYS LYS LYS A A 198 198 . | 104.994 | 122.140 | 17.110 | 1.00 |
| 8.01      | 1 . . |     |                             |         |         |        |      |
| ATOM 1484 | CA    | CA  | . LYS LYS LYS A A 198 198 . | 106.379 | 121.777 | 17.490 | 1.00 |
| 6.10      | 1 . . |     |                             |         |         |        |      |
| ATOM 1485 | CB    | CB  | . LYS LYS LYS A A 198 198 . | 106.372 | 121.027 | 18.846 | 1.00 |
| 5.16      | 1 . . |     |                             |         |         |        |      |
| ATOM 1486 | CG    | CG  | . LYS LYS LYS A A 198 198 . | 107.715 | 120.936 | 19.549 | 1.00 |
| 7.14      | 1 . . |     |                             |         |         |        |      |
| ATOM 1487 | CD    | CD  | . LYS LYS LYS A A 198 198 . | 107.543 | 120.467 | 21.032 | 1.00 |
| 10.19     | 1 . . |     |                             |         |         |        |      |
| ATOM 1488 | CE    | CE  | . LYS LYS LYS A A 198 198 . | 108.844 | 120.562 | 21.860 | 1.00 |
| 9.50      | 1 . . |     |                             |         |         |        |      |
| ATOM 1489 | NZ    | NZ  | . LYS LYS LYS A A 198 198 . | 108.719 | 119.797 | 23.144 | 1.00 |
| 8.62      | 1 . . |     |                             |         |         |        |      |
| ATOM 1490 | C     | C   | . LYS LYS LYS A A 198 198 . | 107.116 | 120.944 | 16.463 | 1.00 |
| 6.42      | 1 . . |     |                             |         |         |        |      |
| ATOM 1491 | O     | O   | . LYS LYS LYS A A 198 198 . | 108.346 | 121.092 | 16.311 | 1.00 |
| 7.54      | 1 . . |     |                             |         |         |        |      |
| ATOM 1492 | N     | N   | . TYR TYR TYR A A 199 199 . | 106.418 | 120.022 | 15.780 | 1.00 |
| 6.25      | 1 . . |     |                             |         |         |        |      |
| ATOM 1493 | CA    | CA  | . TYR TYR TYR A A 199 199 . | 107.049 | 118.997 | 14.967 | 1.00 |
| 7.78      | 1 . . |     |                             |         |         |        |      |
| ATOM 1494 | CB    | CB  | . TYR TYR TYR A A 199 199 . | 106.840 | 117.568 | 15.548 | 1.00 |
| 6.53      | 1 . . |     |                             |         |         |        |      |
| ATOM 1495 | CG    | CG  | . TYR TYR TYR A A 199 199 . | 107.608 | 117.347 | 16.808 | 1.00 |
| 5.54      | 1 . . |     |                             |         |         |        |      |
| ATOM 1496 | CD1   | CD1 | . TYR TYR TYR A A 199 199 . | 106.972 | 117.242 | 18.033 | 1.00 |
| 6.05      | 1 . . |     |                             |         |         |        |      |
| ATOM 1497 | CE1   | CE1 | . TYR TYR TYR A A 199 199 . | 107.713 | 117.081 | 19.196 | 1.00 |
| 6.17      | 1 . . |     |                             |         |         |        |      |
| ATOM 1498 | CZ    | CZ  | . TYR TYR TYR A A 199 199 . | 109.088 | 117.041 | 19.160 | 1.00 |
| 5.76      | 1 . . |     |                             |         |         |        |      |
| ATOM 1499 | OH    | OH  | . TYR TYR TYR A A 199 199 . | 109.798 | 116.943 | 20.323 | 1.00 |
| 10.41     | 1 . . |     |                             |         |         |        |      |
| ATOM 1500 | CE2   | CE2 | . TYR TYR TYR A A 199 199 . | 109.749 | 117.218 | 17.966 | 1.00 |
| 8.41      | 1 . . |     |                             |         |         |        |      |

|           |       |     |                             |         |         |        |      |
|-----------|-------|-----|-----------------------------|---------|---------|--------|------|
| ATOM 1501 | CD2   | CD2 | . TYR TYR TYR A A 199 199 . | 109.007 | 117.369 | 16.808 | 1.00 |
| 8.29      | 1 . . |     |                             |         |         |        |      |
| ATOM 1502 | C     | C   | . TYR TYR TYR A A 199 199 . | 106.635 | 119.048 | 13.510 | 1.00 |
| 7.88      | 1 . . |     |                             |         |         |        |      |
| ATOM 1503 | O     | O   | . TYR TYR TYR A A 199 199 . | 107.221 | 118.319 | 12.703 | 1.00 |
| 8.46      | 1 . . |     |                             |         |         |        |      |
| ATOM 1504 | N     | N   | . GLY GLY GLY A A 200 200 . | 105.650 | 119.883 | 13.158 | 1.00 |
| 9.28      | 1 . . |     |                             |         |         |        |      |
| ATOM 1505 | CA    | CA  | . GLY GLY GLY A A 200 200 . | 105.137 | 119.879 | 11.789 | 1.00 |
| 8.15      | 1 . . |     |                             |         |         |        |      |
| ATOM 1506 | C     | C   | . GLY GLY GLY A A 200 200 . | 103.847 | 119.092 | 11.586 | 1.00 |
| 9.83      | 1 . . |     |                             |         |         |        |      |
| ATOM 1507 | O     | O   | . GLY GLY GLY A A 200 200 . | 103.528 | 118.195 | 12.392 | 1.00 |
| 7.03      | 1 . . |     |                             |         |         |        |      |
| ATOM 1508 | N     | N   | . LYS LYS LYS A A 201 201 . | 103.087 | 119.500 | 10.551 | 1.00 |
| 9.94      | 1 . . |     |                             |         |         |        |      |
| ATOM 1509 | CA    | CA  | . LYS LYS LYS A A 201 201 . | 101.819 | 118.824 | 10.163 | 1.00 |
| 12.24     | 1 . . |     |                             |         |         |        |      |
| ATOM 1510 | CB    | CB  | . LYS LYS LYS A A 201 201 . | 101.167 | 119.546 | 8.958  | 1.00 |
| 14.32     | 1 . . |     |                             |         |         |        |      |
| ATOM 1511 | CG    | CG  | . LYS LYS LYS A A 201 201 . | 101.755 | 119.086 | 7.577  | 1.00 |
| 19.83     | 1 . . |     |                             |         |         |        |      |
| ATOM 1512 | CD    | CD  | . LYS LYS LYS A A 201 201 . | 101.916 | 120.193 | 6.539  | 1.00 |
| 25.62     | 1 . . |     |                             |         |         |        |      |
| ATOM 1513 | CE    | CE  | . LYS LYS LYS A A 201 201 . | 103.303 | 120.151 | 5.877  | 1.00 |
| 28.38     | 1 . . |     |                             |         |         |        |      |
| ATOM 1514 | NZ    | NZ  | . LYS LYS LYS A A 201 201 . | 103.837 | 121.521 | 5.645  | 1.00 |
| 28.48     | 1 . . |     |                             |         |         |        |      |
| ATOM 1515 | C     | C   | . LYS LYS LYS A A 201 201 . | 102.038 | 117.329 | 9.889  | 1.00 |
| 12.01     | 1 . . |     |                             |         |         |        |      |
| ATOM 1516 | O     | O   | . LYS LYS LYS A A 201 201 . | 101.169 | 116.513 | 10.181 | 1.00 |
| 13.43     | 1 . . |     |                             |         |         |        |      |
| ATOM 1517 | N     | N   | . ASP ASP ASP A A 202 202 . | 103.242 | 116.960 | 9.449  | 1.00 |
| 10.24     | 1 . . |     |                             |         |         |        |      |
| ATOM 1518 | CA    | CA  | . ASP ASP ASP A A 202 202 . | 103.565 | 115.581 | 9.080  | 1.00 |
| 11.45     | 1 . . |     |                             |         |         |        |      |
| ATOM 1519 | CB    | CB  | . ASP ASP ASP A A 202 202 . | 104.869 | 115.594 | 8.282  | 1.00 |
| 13.78     | 1 . . |     |                             |         |         |        |      |
| ATOM 1520 | CG    | CG  | . ASP ASP ASP A A 202 202 . | 105.748 | 116.757 | 8.685  | 1.00 |
| 19.03     | 1 . . |     |                             |         |         |        |      |
| ATOM 1521 | OD1   | OD1 | . ASP ASP ASP A A 202 202 . | 105.655 | 117.854 | 8.076  | 1.00 |
| 24.23     | 1 . . |     |                             |         |         |        |      |
| ATOM 1522 | OD2   | OD2 | . ASP ASP ASP A A 202 202 . | 106.471 | 116.601 | 9.672  | 1.00 |
| 25.04     | 1 . . |     |                             |         |         |        |      |
| ATOM 1523 | C     | C   | . ASP ASP ASP A A 202 202 . | 103.678 | 114.648 | 10.270 | 1.00 |
| 10.05     | 1 . . |     |                             |         |         |        |      |
| ATOM 1524 | O     | O   | . ASP ASP ASP A A 202 202 . | 103.658 | 113.384 | 10.089 | 1.00 |
| 8.87      | 1 . . |     |                             |         |         |        |      |
| ATOM 1525 | N     | N   | . ALA ALA ALA A A 203 203 . | 103.728 | 115.249 | 11.475 | 1.00 |
| 7.70      | 1 . . |     |                             |         |         |        |      |
| ATOM 1526 | CA    | CA  | . ALA ALA ALA A A 203 203 . | 103.831 | 114.483 | 12.706 | 1.00 |
| 6.97      | 1 . . |     |                             |         |         |        |      |
| ATOM 1527 | CB    | CB  | . ALA ALA ALA A A 203 203 . | 104.642 | 115.283 | 13.715 | 1.00 |
| 7.96      | 1 . . |     |                             |         |         |        |      |









|           |       |     |                             |         |         |        |      |
|-----------|-------|-----|-----------------------------|---------|---------|--------|------|
| ATOM 1609 | ND2   | ND2 | . ASN ASN ASN A A 215 215 . | 107.956 | 113.934 | 13.432 | 1.00 |
| 14.38     | 1 . . |     |                             |         |         |        |      |
| ATOM 1610 | C     | C   | . ASN ASN ASN A A 215 215 . | 109.437 | 111.622 | 16.023 | 1.00 |
| 8.95      | 1 . . |     |                             |         |         |        |      |
| ATOM 1611 | O     | O   | . ASN ASN ASN A A 215 215 . | 110.435 | 112.292 | 15.823 | 1.00 |
| 11.30     | 1 . . |     |                             |         |         |        |      |
| ATOM 1612 | N     | N   | . ILE ILE ILE A A 216 216 . | 109.118 | 111.174 | 17.226 | 1.00 |
| 7.39      | 1 . . |     |                             |         |         |        |      |
| ATOM 1613 | CA    | CA  | . ILE ILE ILE A A 216 216 . | 109.917 | 111.363 | 18.456 | 1.00 |
| 6.88      | 1 . . |     |                             |         |         |        |      |
| ATOM 1614 | CB    | CB  | . ILE ILE ILE A A 216 216 . | 109.136 | 112.114 | 19.530 | 1.00 |
| 6.80      | 1 . . |     |                             |         |         |        |      |
| ATOM 1615 | CG1   | CG1 | . ILE ILE ILE A A 216 216 . | 107.877 | 111.310 | 19.954 | 1.00 |
| 5.15      | 1 . . |     |                             |         |         |        |      |
| ATOM 1616 | CD1   | CD1 | . ILE ILE ILE A A 216 216 . | 107.149 | 111.883 | 21.175 | 1.00 |
| 5.52      | 1 . . |     |                             |         |         |        |      |
| ATOM 1617 | CG2   | CG2 | . ILE ILE ILE A A 216 216 . | 108.812 | 113.469 | 18.993 | 1.00 |
| 9.04      | 1 . . |     |                             |         |         |        |      |
| ATOM 1618 | C     | C   | . ILE ILE ILE A A 216 216 . | 110.446 | 110.042 | 18.986 | 1.00 |
| 7.32      | 1 . . |     |                             |         |         |        |      |
| ATOM 1619 | O     | O   | . ILE ILE ILE A A 216 216 . | 109.910 | 108.943 | 18.622 | 1.00 |
| 8.70      | 1 . . |     |                             |         |         |        |      |
| ATOM 1620 | N     | N   | . LEU LEU LEU A A 217 217 . | 111.548 | 110.125 | 19.745 | 1.00 |
| 7.89      | 1 . . |     |                             |         |         |        |      |
| ATOM 1621 | CA    | CA  | . LEU LEU LEU A A 217 217 . | 112.120 | 108.945 | 20.382 | 1.00 |
| 7.46      | 1 . . |     |                             |         |         |        |      |
| ATOM 1622 | CB    | CB  | . LEU LEU LEU A A 217 217 . | 113.640 | 108.845 | 20.185 | 1.00 |
| 5.62      | 1 . . |     |                             |         |         |        |      |
| ATOM 1623 | CG    | CG  | . LEU LEU LEU A A 217 217 . | 114.497 | 107.917 | 21.037 | 1.00 |
| 10.19     | 1 . . |     |                             |         |         |        |      |
| ATOM 1624 | CD1   | CD1 | . LEU LEU LEU A A 217 217 . | 114.233 | 106.403 | 20.715 | 1.00 |
| 9.42      | 1 . . |     |                             |         |         |        |      |
| ATOM 1625 | CD2   | CD2 | . LEU LEU LEU A A 217 217 . | 115.962 | 108.286 | 20.784 | 1.00 |
| 10.47     | 1 . . |     |                             |         |         |        |      |
| ATOM 1626 | C     | C   | . LEU LEU LEU A A 217 217 . | 111.829 | 108.878 | 21.863 | 1.00 |
| 8.53      | 1 . . |     |                             |         |         |        |      |
| ATOM 1627 | O     | O   | . LEU LEU LEU A A 217 217 . | 111.635 | 107.780 | 22.414 | 1.00 |
| 7.07      | 1 . . |     |                             |         |         |        |      |
| ATOM 1628 | N     | N   | . GLU GLU GLU A A 218 218 . | 111.859 | 110.041 | 22.538 | 1.00 |
| 7.92      | 1 . . |     |                             |         |         |        |      |
| ATOM 1629 | CA    | CA  | . GLU GLU GLU A A 218 218 . | 111.857 | 110.030 | 24.027 | 1.00 |
| 8.03      | 1 . . |     |                             |         |         |        |      |
| ATOM 1630 | CB    | CB  | . GLU GLU GLU A A 218 218 . | 112.593 | 111.269 | 24.627 | 1.00 |
| 8.72      | 1 . . |     |                             |         |         |        |      |
| ATOM 1631 | CG    | CG  | . GLU GLU GLU A A 218 218 . | 114.050 | 111.351 | 24.172 | 1.00 |
| 13.09     | 1 . . |     |                             |         |         |        |      |
| ATOM 1632 | CD    | CD  | . GLU GLU GLU A A 218 218 . | 115.045 | 111.079 | 25.270 | 1.00 |
| 24.46     | 1 . . |     |                             |         |         |        |      |
| ATOM 1633 | OE1   | OE1 | . GLU GLU GLU A A 218 218 . | 116.012 | 111.877 | 25.379 | 1.00 |
| 29.81     | 1 . . |     |                             |         |         |        |      |
| ATOM 1634 | OE2   | OE2 | . GLU GLU GLU A A 218 218 . | 114.877 | 110.075 | 26.021 | 1.00 |
| 28.54     | 1 . . |     |                             |         |         |        |      |
| ATOM 1635 | C     | C   | . GLU GLU GLU A A 218 218 . | 110.463 | 109.895 | 24.574 | 1.00 |
| 8.33      | 1 . . |     |                             |         |         |        |      |

|           |       |     |                             |         |         |        |      |
|-----------|-------|-----|-----------------------------|---------|---------|--------|------|
| ATOM 1636 | O     | O   | . GLU GLU GLU A A 218 218 . | 109.556 | 110.679 | 24.206 | 1.00 |
| 10.28     | 1 . . |     |                             |         |         |        |      |
| ATOM 1637 | N     | N   | . ASN ASN ASN A A 219 219 . | 110.287 | 108.913 | 25.455 | 1.00 |
| 7.89      | 1 . . |     |                             |         |         |        |      |
| ATOM 1638 | CA    | CA  | . ASN ASN ASN A A 219 219 . | 109.009 | 108.677 | 26.017 | 1.00 |
| 7.74      | 1 . . |     |                             |         |         |        |      |
| ATOM 1639 | CB    | CB  | . ASN ASN ASN A A 219 219 . | 109.036 | 107.370 | 26.772 | 1.00 |
| 8.50      | 1 . . |     |                             |         |         |        |      |
| ATOM 1640 | CG    | CG  | . ASN ASN ASN A A 219 219 . | 109.356 | 106.244 | 25.875 | 1.00 |
| 7.23      | 1 . . |     |                             |         |         |        |      |
| ATOM 1641 | OD1   | OD1 | . ASN ASN ASN A A 219 219 . | 110.469 | 105.749 | 25.884 | 1.00 |
| 11.67     | 1 . . |     |                             |         |         |        |      |
| ATOM 1642 | ND2   | ND2 | . ASN ASN ASN A A 219 219 . | 108.432 | 105.883 | 25.015 | 1.00 |
| 4.68      | 1 . . |     |                             |         |         |        |      |
| ATOM 1643 | C     | C   | . ASN ASN ASN A A 219 219 . | 108.608 | 109.867 | 26.886 | 1.00 |
| 7.67      | 1 . . |     |                             |         |         |        |      |
| ATOM 1644 | O     | O   | . ASN ASN ASN A A 219 219 . | 107.439 | 110.240 | 26.970 | 1.00 |
| 8.30      | 1 . . |     |                             |         |         |        |      |
| ATOM 1645 | N     | N   | . SER SER SER A A 220 220 . | 109.580 | 110.486 | 27.555 | 1.00 |
| 6.89      | 1 . . |     |                             |         |         |        |      |
| ATOM 1646 | CA    | CA  | . SER SER SER A A 220 220 . | 109.251 | 111.656 | 28.363 | 1.00 |
| 8.60      | 1 . . |     |                             |         |         |        |      |
| ATOM 1647 | CB    | CB  | . SER SER SER A A 220 220 . | 110.502 | 112.122 | 29.104 | 1.00 |
| 9.44      | 1 . . |     |                             |         |         |        |      |
| ATOM 1648 | OG    | OG  | . SER SER SER A A 220 220 . | 111.557 | 112.371 | 28.193 | 1.00 |
| 11.28     | 1 . . |     |                             |         |         |        |      |
| ATOM 1649 | C     | C   | . SER SER SER A A 220 220 . | 108.648 | 112.812 | 27.508 | 1.00 |
| 7.09      | 1 . . |     |                             |         |         |        |      |
| ATOM 1650 | O     | O   | . SER SER SER A A 220 220 . | 107.852 | 113.611 | 28.036 | 1.00 |
| 8.86      | 1 . . |     |                             |         |         |        |      |
| ATOM 1651 | N     | N   | . GLU GLU GLU A A 221 221 . | 109.066 | 112.936 | 26.259 | 1.00 |
| 9.26      | 1 . . |     |                             |         |         |        |      |
| ATOM 1652 | CA    | CA  | . GLU GLU GLU A A 221 221 . | 108.552 | 113.940 | 25.362 | 1.00 |
| 7.54      | 1 . . |     |                             |         |         |        |      |
| ATOM 1653 | CB    | CB  | . GLU GLU GLU A A 221 221 . | 109.439 | 114.039 | 24.116 | 1.00 |
| 7.76      | 1 . . |     |                             |         |         |        |      |
| ATOM 1654 | CG    | CG  | . GLU GLU GLU A A 221 221 . | 108.900 | 114.948 | 22.975 | 1.00 |
| 7.90      | 1 . . |     |                             |         |         |        |      |
| ATOM 1655 | CD    | CD  | . GLU GLU GLU A A 221 221 . | 108.837 | 116.452 | 23.359 | 1.00 |
| 11.96     | 1 . . |     |                             |         |         |        |      |
| ATOM 1656 | OE1   | OE1 | . GLU GLU GLU A A 221 221 . | 109.375 | 116.819 | 24.408 | 1.00 |
| 10.95     | 1 . . |     |                             |         |         |        |      |
| ATOM 1657 | OE2   | OE2 | . GLU GLU GLU A A 221 221 . | 108.233 | 117.263 | 22.599 | 1.00 |
| 12.31     | 1 . . |     |                             |         |         |        |      |
| ATOM 1658 | C     | C   | . GLU GLU GLU A A 221 221 . | 107.112 | 113.635 | 25.006 | 1.00 |
| 6.75      | 1 . . |     |                             |         |         |        |      |
| ATOM 1659 | O     | O   | . GLU GLU GLU A A 221 221 . | 106.269 | 114.539 | 24.879 | 1.00 |
| 8.94      | 1 . . |     |                             |         |         |        |      |
| ATOM 1660 | N     | N   | . ALA ALA ALA A A 222 222 . | 106.796 | 112.361 | 24.836 | 1.00 |
| 6.30      | 1 . . |     |                             |         |         |        |      |
| ATOM 1661 | CA    | CA  | . ALA ALA ALA A A 222 222 . | 105.356 | 112.034 | 24.615 | 1.00 |
| 3.58      | 1 . . |     |                             |         |         |        |      |
| ATOM 1662 | CB    | CB  | . ALA ALA ALA A A 222 222 . | 105.182 | 110.555 | 24.369 | 1.00 |
| 4.24      | 1 . . |     |                             |         |         |        |      |

|           |       |     |                           |                          |      |
|-----------|-------|-----|---------------------------|--------------------------|------|
| ATOM 1663 | C     | C   | . ALA ALA ALA A A 222 222 | . 104.541 112.498 25.819 | 1.00 |
| 3.73      | 1 . . |     |                           |                          |      |
| ATOM 1664 | O     | O   | . ALA ALA ALA A A 222 222 | . 103.490 113.089 25.657 | 1.00 |
| 4.17      | 1 . . |     |                           |                          |      |
| ATOM 1665 | N     | N   | . LEU LEU LEU A A 223 223 | . 105.013 112.183 27.035 | 1.00 |
| 4.55      | 1 . . |     |                           |                          |      |
| ATOM 1666 | CA    | CA  | . LEU LEU LEU A A 223 223 | . 104.308 112.611 28.252 | 1.00 |
| 4.90      | 1 . . |     |                           |                          |      |
| ATOM 1667 | CB    | CB  | . LEU LEU LEU A A 223 223 | . 105.030 112.160 29.498 | 1.00 |
| 4.35      | 1 . . |     |                           |                          |      |
| ATOM 1668 | CG    | CG  | . LEU LEU LEU A A 223 223 | . 104.899 110.667 29.702 | 1.00 |
| 4.86      | 1 . . |     |                           |                          |      |
| ATOM 1669 | CD1   | CD1 | . LEU LEU LEU A A 223 223 | . 106.023 110.077 30.736 | 1.00 |
| 6.46      | 1 . . |     |                           |                          |      |
| ATOM 1670 | CD2   | CD2 | . LEU LEU LEU A A 223 223 | . 103.447 110.347 30.084 | 1.00 |
| 4.70      | 1 . . |     |                           |                          |      |
| ATOM 1671 | C     | C   | . LEU LEU LEU A A 223 223 | . 104.237 114.140 28.325 | 1.00 |
| 4.21      | 1 . . |     |                           |                          |      |
| ATOM 1672 | O     | O   | . LEU LEU LEU A A 223 223 | . 103.226 114.673 28.710 | 1.00 |
| 6.63      | 1 . . |     |                           |                          |      |
| ATOM 1673 | N     | N   | . GLU GLU GLU A A 224 224 | . 105.274 114.819 27.877 | 1.00 |
| 5.94      | 1 . . |     |                           |                          |      |
| ATOM 1674 | CA    | CA  | . GLU GLU GLU A A 224 224 | . 105.320 116.281 27.996 | 1.00 |
| 5.86      | 1 . . |     |                           |                          |      |
| ATOM 1675 | CB    | CB  | . GLU GLU GLU A A 224 224 | . 106.737 116.788 27.625 | 1.00 |
| 7.82      | 1 . . |     |                           |                          |      |
| ATOM 1676 | CG    | CG  | . GLU GLU GLU A A 224 224 | . 106.819 118.298 27.551 | 1.00 |
| 11.24     | 1 . . |     |                           |                          |      |
| ATOM 1677 | CD    | CD  | . GLU GLU GLU A A 224 224 | . 106.980 118.985 28.877 | 1.00 |
| 14.15     | 1 . . |     |                           |                          |      |
| ATOM 1678 | OE1   | OE1 | . GLU GLU GLU A A 224 224 | . 106.905 120.225 28.869 | 1.00 |
| 16.28     | 1 . . |     |                           |                          |      |
| ATOM 1679 | OE2   | OE2 | . GLU GLU GLU A A 224 224 | . 107.230 118.347 29.929 | 1.00 |
| 16.08     | 1 . . |     |                           |                          |      |
| ATOM 1680 | C     | C   | . GLU GLU GLU A A 224 224 | . 104.283 116.837 27.041 | 1.00 |
| 4.89      | 1 . . |     |                           |                          |      |
| ATOM 1681 | O     | O   | . GLU GLU GLU A A 224 224 | . 103.593 117.811 27.333 | 1.00 |
| 6.77      | 1 . . |     |                           |                          |      |
| ATOM 1682 | N     | N   | . LEU LEU LEU A A 225 225 | . 104.204 116.233 25.865 | 1.00 |
| 4.92      | 1 . . |     |                           |                          |      |
| ATOM 1683 | CA    | CA  | . LEU LEU LEU A A 225 225 | . 103.201 116.690 24.900 | 1.00 |
| 5.01      | 1 . . |     |                           |                          |      |
| ATOM 1684 | CB    | CB  | . LEU LEU LEU A A 225 225 | . 103.360 115.961 23.545 | 1.00 |
| 6.83      | 1 . . |     |                           |                          |      |
| ATOM 1685 | CG    | CG  | . LEU LEU LEU A A 225 225 | . 104.613 116.278 22.695 | 1.00 |
| 7.19      | 1 . . |     |                           |                          |      |
| ATOM 1686 | CD1   | CD1 | . LEU LEU LEU A A 225 225 | . 104.871 115.255 21.610 | 1.00 |
| 6.07      | 1 . . |     |                           |                          |      |
| ATOM 1687 | CD2   | CD2 | . LEU LEU LEU A A 225 225 | . 104.508 117.733 22.147 | 1.00 |
| 7.62      | 1 . . |     |                           |                          |      |
| ATOM 1688 | C     | C   | . LEU LEU LEU A A 225 225 | . 101.795 116.490 25.434 | 1.00 |
| 5.68      | 1 . . |     |                           |                          |      |
| ATOM 1689 | O     | O   | . LEU LEU LEU A A 225 225 | . 100.919 117.381 25.313 | 1.00 |
| 5.77      | 1 . . |     |                           |                          |      |

|           |       |     |                             |         |         |        |      |
|-----------|-------|-----|-----------------------------|---------|---------|--------|------|
| ATOM 1690 | N     | N   | . VAL VAL VAL A A 226 226 . | 101.561 | 115.327 | 26.060 | 1.00 |
| 6.72      | 1 . . |     |                             |         |         |        |      |
| ATOM 1691 | CA    | CA  | . VAL VAL VAL A A 226 226 . | 100.205 | 115.098 | 26.549 | 1.00 |
| 6.08      | 1 . . |     |                             |         |         |        |      |
| ATOM 1692 | CB    | CB  | . VAL VAL VAL A A 226 226 . | 100.009 | 113.663 | 26.948 | 1.00 |
| 6.14      | 1 . . |     |                             |         |         |        |      |
| ATOM 1693 | CG1   | CG1 | . VAL VAL VAL A A 226 226 . | 98.689  | 113.572 | 27.703 | 1.00 |
| 4.43      | 1 . . |     |                             |         |         |        |      |
| ATOM 1694 | CG2   | CG2 | . VAL VAL VAL A A 226 226 . | 100.013 | 112.771 | 25.668 | 1.00 |
| 6.54      | 1 . . |     |                             |         |         |        |      |
| ATOM 1695 | C     | C   | . VAL VAL VAL A A 226 226 . | 99.832  | 116.060 | 27.723 | 1.00 |
| 7.50      | 1 . . |     |                             |         |         |        |      |
| ATOM 1696 | O     | O   | . VAL VAL VAL A A 226 226 . | 98.721  | 116.583 | 27.794 | 1.00 |
| 8.39      | 1 . . |     |                             |         |         |        |      |
| ATOM 1697 | N     | N   | . LYS LYS LYS A A 227 227 . | 100.786 | 116.287 | 28.616 | 1.00 |
| 7.71      | 1 . . |     |                             |         |         |        |      |
| ATOM 1698 | CA    | CA  | . LYS LYS LYS A A 227 227 . | 100.565 | 117.177 | 29.753 | 1.00 |
| 8.73      | 1 . . |     |                             |         |         |        |      |
| ATOM 1699 | CB    | CB  | . LYS LYS LYS A A 227 227 . | 101.795 | 117.081 | 30.668 | 1.00 |
| 8.08      | 1 . . |     |                             |         |         |        |      |
| ATOM 1700 | CG    | CG  | . LYS LYS LYS A A 227 227 . | 101.938 | 118.142 | 31.740 | 1.00 |
| 13.50     | 1 . . |     |                             |         |         |        |      |
| ATOM 1701 | CD    | CD  | . LYS LYS LYS A A 227 227 . | 103.231 | 117.931 | 32.532 | 1.00 |
| 18.80     | 1 . . |     |                             |         |         |        |      |
| ATOM 1702 | CE    | CE  | . LYS LYS LYS A A 227 227 . | 103.386 | 118.876 | 33.736 | 1.00 |
| 22.67     | 1 . . |     |                             |         |         |        |      |
| ATOM 1703 | NZ    | NZ  | . LYS LYS LYS A A 227 227 . | 103.803 | 118.102 | 34.967 | 1.00 |
| 21.01     | 1 . . |     |                             |         |         |        |      |
| ATOM 1704 | C     | C   | . LYS LYS LYS A A 227 227 . | 100.297 | 118.609 | 29.236 | 1.00 |
| 8.44      | 1 . . |     |                             |         |         |        |      |
| ATOM 1705 | O     | O   | . LYS LYS LYS A A 227 227 . | 99.374  | 119.263 | 29.718 | 1.00 |
| 6.04      | 1 . . |     |                             |         |         |        |      |
| ATOM 1706 | N     | N   | . GLU GLU GLU A A 228 228 . | 101.053 | 119.072 | 28.250 | 1.00 |
| 9.11      | 1 . . |     |                             |         |         |        |      |
| ATOM 1707 | CA    | CA  | . GLU GLU GLU A A 228 228 . | 100.801 | 120.408 | 27.651 | 1.00 |
| 9.00      | 1 . . |     |                             |         |         |        |      |
| ATOM 1708 | CB    | CB  | . GLU GLU GLU A A 228 228 . | 101.876 | 120.680 | 26.573 | 1.00 |
| 10.09     | 1 . . |     |                             |         |         |        |      |
| ATOM 1709 | CG    | CG  | . GLU GLU GLU A A 228 228 . | 101.807 | 121.939 | 25.771 | 1.00 |
| 16.38     | 1 . . |     |                             |         |         |        |      |
| ATOM 1710 | CD    | CD  | . GLU GLU GLU A A 228 228 . | 102.014 | 123.241 | 26.552 | 1.00 |
| 23.03     | 1 . . |     |                             |         |         |        |      |
| ATOM 1711 | OE1   | OE1 | . GLU GLU GLU A A 228 228 . | 101.893 | 124.286 | 25.888 | 1.00 |
| 25.99     | 1 . . |     |                             |         |         |        |      |
| ATOM 1712 | OE2   | OE2 | . GLU GLU GLU A A 228 228 . | 102.253 | 123.252 | 27.789 | 1.00 |
| 27.05     | 1 . . |     |                             |         |         |        |      |
| ATOM 1713 | C     | C   | . GLU GLU GLU A A 228 228 . | 99.369  | 120.494 | 27.084 | 1.00 |
| 8.22      | 1 . . |     |                             |         |         |        |      |
| ATOM 1714 | O     | O   | . GLU GLU GLU A A 228 228 . | 98.653  | 121.489 | 27.291 | 1.00 |
| 8.46      | 1 . . |     |                             |         |         |        |      |
| ATOM 1715 | N     | N   | . ALA ALA ALA A A 229 229 . | 98.932  | 119.415 | 26.403 | 1.00 |
| 6.13      | 1 . . |     |                             |         |         |        |      |
| ATOM 1716 | CA    | CA  | . ALA ALA ALA A A 229 229 . | 97.650  | 119.478 | 25.754 | 1.00 |
| 5.35      | 1 . . |     |                             |         |         |        |      |

|           |       |     |                   |         |          |         |        |      |
|-----------|-------|-----|-------------------|---------|----------|---------|--------|------|
| ATOM 1717 | CB    | CB  | . ALA ALA ALA A A | 229 229 | . 97.494 | 118.303 | 24.788 | 1.00 |
| 5.19      | 1 . . |     |                   |         |          |         |        |      |
| ATOM 1718 | C     | C   | . ALA ALA ALA A A | 229 229 | . 96.510 | 119.529 | 26.791 | 1.00 |
| 5.21      | 1 . . |     |                   |         |          |         |        |      |
| ATOM 1719 | O     | O   | . ALA ALA ALA A A | 229 229 | . 95.455 | 120.222 | 26.598 | 1.00 |
| 7.15      | 1 . . |     |                   |         |          |         |        |      |
| ATOM 1720 | N     | N   | . ILE ILE ILE A A | 230 230 | . 96.743 | 118.814 | 27.885 | 1.00 |
| 5.36      | 1 . . |     |                   |         |          |         |        |      |
| ATOM 1721 | CA    | CA  | . ILE ILE ILE A A | 230 230 | . 95.823 | 118.795 | 28.983 | 1.00 |
| 6.82      | 1 . . |     |                   |         |          |         |        |      |
| ATOM 1722 | CB    | CB  | . ILE ILE ILE A A | 230 230 | . 96.197 | 117.759 | 30.073 | 1.00 |
| 5.65      | 1 . . |     |                   |         |          |         |        |      |
| ATOM 1723 | CG1   | CG1 | . ILE ILE ILE A A | 230 230 | . 95.982 | 116.325 | 29.538 | 1.00 |
| 4.60      | 1 . . |     |                   |         |          |         |        |      |
| ATOM 1724 | CD1   | CD1 | . ILE ILE ILE A A | 230 230 | . 96.466 | 115.224 | 30.535 | 1.00 |
| 7.12      | 1 . . |     |                   |         |          |         |        |      |
| ATOM 1725 | CG2   | CG2 | . ILE ILE ILE A A | 230 230 | . 95.218 | 117.897 | 31.363 | 1.00 |
| 8.51      | 1 . . |     |                   |         |          |         |        |      |
| ATOM 1726 | C     | C   | . ILE ILE ILE A A | 230 230 | . 95.709 | 120.203 | 29.591 | 1.00 |
| 6.76      | 1 . . |     |                   |         |          |         |        |      |
| ATOM 1727 | O     | O   | . ILE ILE ILE A A | 230 230 | . 94.608 | 120.767 | 29.749 | 1.00 |
| 9.48      | 1 . . |     |                   |         |          |         |        |      |
| ATOM 1728 | N     | N   | . ASP ASP ASP A A | 231 231 | . 96.870 | 120.795 | 29.880 | 1.00 |
| 8.20      | 1 . . |     |                   |         |          |         |        |      |
| ATOM 1729 | CA    | CA  | . ASP ASP ASP A A | 231 231 | . 96.816 | 122.110 | 30.493 | 1.00 |
| 8.84      | 1 . . |     |                   |         |          |         |        |      |
| ATOM 1730 | CB    | CB  | . ASP ASP ASP A A | 231 231 | . 98.219 | 122.477 | 31.002 | 1.00 |
| 11.19     | 1 . . |     |                   |         |          |         |        |      |
| ATOM 1731 | CG    | CG  | . ASP ASP ASP A A | 231 231 | . 98.774 | 121.474 | 32.070 | 1.00 |
| 15.11     | 1 . . |     |                   |         |          |         |        |      |
| ATOM 1732 | OD1   | OD1 | . ASP ASP ASP A A | 231 231 | . 99.954 | 121.624 | 32.470 | 1.00 |
| 22.55     | 1 . . |     |                   |         |          |         |        |      |
| ATOM 1733 | OD2   | OD2 | . ASP ASP ASP A A | 231 231 | . 98.058 | 120.560 | 32.532 | 1.00 |
| 22.12     | 1 . . |     |                   |         |          |         |        |      |
| ATOM 1734 | C     | C   | . ASP ASP ASP A A | 231 231 | . 96.281 | 123.150 | 29.474 | 1.00 |
| 9.31      | 1 . . |     |                   |         |          |         |        |      |
| ATOM 1735 | O     | O   | . ASP ASP ASP A A | 231 231 | . 95.483 | 124.050 | 29.862 | 1.00 |
| 8.17      | 1 . . |     |                   |         |          |         |        |      |
| ATOM 1736 | N     | N   | . LYS LYS LYS A A | 232 232 | . 96.676 | 123.035 | 28.195 | 1.00 |
| 8.56      | 1 . . |     |                   |         |          |         |        |      |
| ATOM 1737 | CA    | CA  | . LYS LYS LYS A A | 232 232 | . 96.186 | 124.036 | 27.203 | 1.00 |
| 9.12      | 1 . . |     |                   |         |          |         |        |      |
| ATOM 1738 | CB    | CB  | . LYS LYS LYS A A | 232 232 | . 96.942 | 123.989 | 25.876 | 1.00 |
| 10.36     | 1 . . |     |                   |         |          |         |        |      |
| ATOM 1739 | CG    | CG  | . LYS LYS LYS A A | 232 232 | . 96.672 | 125.238 | 25.039 | 1.00 |
| 16.79     | 1 . . |     |                   |         |          |         |        |      |
| ATOM 1740 | CD    | CD  | . LYS LYS LYS A A | 232 232 | . 97.458 | 125.280 | 23.729 | 1.00 |
| 24.39     | 1 . . |     |                   |         |          |         |        |      |
| ATOM 1741 | CE    | CE  | . LYS LYS LYS A A | 232 232 | . 96.527 | 125.048 | 22.540 | 1.00 |
| 25.88     | 1 . . |     |                   |         |          |         |        |      |
| ATOM 1742 | NZ    | NZ  | . LYS LYS LYS A A | 232 232 | . 97.055 | 125.674 | 21.290 | 1.00 |
| 28.95     | 1 . . |     |                   |         |          |         |        |      |
| ATOM 1743 | C     | C   | . LYS LYS LYS A A | 232 232 | . 94.661 | 123.944 | 26.995 | 1.00 |
| 10.05     | 1 . . |     |                   |         |          |         |        |      |

|           |       |     |                   |         |          |         |        |      |
|-----------|-------|-----|-------------------|---------|----------|---------|--------|------|
| ATOM 1744 | O     | O   | . LYS LYS LYS A A | 232 232 | . 93.982 | 124.927 | 26.637 | 1.00 |
| 10.71     | 1 . . |     |                   |         |          |         |        |      |
| ATOM 1745 | N     | N   | . ALA ALA ALA A A | 233 233 | . 94.109 | 122.734 | 27.205 | 1.00 |
| 8.42      | 1 . . |     |                   |         |          |         |        |      |
| ATOM 1746 | CA    | CA  | . ALA ALA ALA A A | 233 233 | . 92.650 | 122.567 | 27.054 | 1.00 |
| 8.04      | 1 . . |     |                   |         |          |         |        |      |
| ATOM 1747 | CB    | CB  | . ALA ALA ALA A A | 233 233 | . 92.216 | 121.077 | 26.569 | 1.00 |
| 6.46      | 1 . . |     |                   |         |          |         |        |      |
| ATOM 1748 | C     | C   | . ALA ALA ALA A A | 233 233 | . 91.906 | 122.950 | 28.307 | 1.00 |
| 7.74      | 1 . . |     |                   |         |          |         |        |      |
| ATOM 1749 | O     | O   | . ALA ALA ALA A A | 233 233 | . 90.689 | 122.951 | 28.329 | 1.00 |
| 8.33      | 1 . . |     |                   |         |          |         |        |      |
| ATOM 1750 | N     | N   | . GLY GLY GLY A A | 234 234 | . 92.678 | 123.281 | 29.329 | 1.00 |
| 7.32      | 1 . . |     |                   |         |          |         |        |      |
| ATOM 1751 | CA    | CA  | . GLY GLY GLY A A | 234 234 | . 92.199 | 123.792 | 30.631 | 1.00 |
| 8.06      | 1 . . |     |                   |         |          |         |        |      |
| ATOM 1752 | C     | C   | . GLY GLY GLY A A | 234 234 | . 91.651 | 122.726 | 31.558 | 1.00 |
| 8.57      | 1 . . |     |                   |         |          |         |        |      |
| ATOM 1753 | O     | O   | . GLY GLY GLY A A | 234 234 | . 90.748 | 123.007 | 32.354 | 1.00 |
| 9.90      | 1 . . |     |                   |         |          |         |        |      |
| ATOM 1754 | N     | N   | . TYR TYR TYR A A | 235 235 | . 92.183 | 121.520 | 31.486 | 1.00 |
| 6.67      | 1 . . |     |                   |         |          |         |        |      |
| ATOM 1755 | CA    | CA  | . TYR TYR TYR A A | 235 235 | . 91.656 | 120.412 | 32.269 | 1.00 |
| 6.97      | 1 . . |     |                   |         |          |         |        |      |
| ATOM 1756 | CB    | CB  | . TYR TYR TYR A A | 235 235 | . 91.073 | 119.347 | 31.331 | 1.00 |
| 6.76      | 1 . . |     |                   |         |          |         |        |      |
| ATOM 1757 | CG    | CG  | . TYR TYR TYR A A | 235 235 | . 89.827 | 119.786 | 30.618 | 1.00 |
| 5.20      | 1 . . |     |                   |         |          |         |        |      |
| ATOM 1758 | CD1   | CD1 | . TYR TYR TYR A A | 235 235 | . 89.775 | 119.742 | 29.197 | 1.00 |
| 4.03      | 1 . . |     |                   |         |          |         |        |      |
| ATOM 1759 | CE1   | CE1 | . TYR TYR TYR A A | 235 235 | . 88.638 | 120.167 | 28.502 | 1.00 |
| 3.37      | 1 . . |     |                   |         |          |         |        |      |
| ATOM 1760 | CZ    | CZ  | . TYR TYR TYR A A | 235 235 | . 87.529 | 120.610 | 29.238 | 1.00 |
| 6.85      | 1 . . |     |                   |         |          |         |        |      |
| ATOM 1761 | OH    | OH  | . TYR TYR TYR A A | 235 235 | . 86.410 | 120.977 | 28.591 | 1.00 |
| 8.48      | 1 . . |     |                   |         |          |         |        |      |
| ATOM 1762 | CE2   | CE2 | . TYR TYR TYR A A | 235 235 | . 87.535 | 120.668 | 30.629 | 1.00 |
| 6.97      | 1 . . |     |                   |         |          |         |        |      |
| ATOM 1763 | CD2   | CD2 | . TYR TYR TYR A A | 235 235 | . 88.682 | 120.208 | 31.318 | 1.00 |
| 5.56      | 1 . . |     |                   |         |          |         |        |      |
| ATOM 1764 | C     | C   | . TYR TYR TYR A A | 235 235 | . 92.685 | 119.767 | 33.178 | 1.00 |
| 6.38      | 1 . . |     |                   |         |          |         |        |      |
| ATOM 1765 | O     | O   | . TYR TYR TYR A A | 235 235 | . 92.551 | 118.600 | 33.512 | 1.00 |
| 5.61      | 1 . . |     |                   |         |          |         |        |      |
| ATOM 1766 | N     | N   | . THR THR THR A A | 236 236 | . 93.706 | 120.520 | 33.555 | 1.00 |
| 5.93      | 1 . . |     |                   |         |          |         |        |      |
| ATOM 1767 | CA    | CA  | . THR THR THR A A | 236 236 | . 94.702 | 120.012 | 34.465 | 1.00 |
| 9.17      | 1 . . |     |                   |         |          |         |        |      |
| ATOM 1768 | CB    | CB  | . THR THR THR A A | 236 236 | . 95.699 | 121.129 | 34.802 | 1.00 |
| 10.60     | 1 . . |     |                   |         |          |         |        |      |
| ATOM 1769 | OG1   | OG1 | . THR THR THR A A | 236 236 | . 96.387 | 121.503 | 33.579 | 1.00 |
| 13.85     | 1 . . |     |                   |         |          |         |        |      |
| ATOM 1770 | CG2   | CG2 | . THR THR THR A A | 236 236 | . 96.705 | 120.681 | 35.834 | 1.00 |
| 9.69      | 1 . . |     |                   |         |          |         |        |      |

|           |     |       |                             |        |         |        |      |
|-----------|-----|-------|-----------------------------|--------|---------|--------|------|
| ATOM 1771 | C   | C     | . THR THR THR A A 236 236 . | 94.151 | 119.334 | 35.723 | 1.00 |
| 11.64     | 1   | . . . |                             |        |         |        |      |
| ATOM 1772 | O   | O     | . THR THR THR A A 236 236 . | 94.724 | 118.334 | 36.193 | 1.00 |
| 11.51     | 1   | . . . |                             |        |         |        |      |
| ATOM 1773 | N   | N     | . GLU GLU GLU A A 237 237 . | 93.075 | 119.878 | 36.306 | 1.00 |
| 12.80     | 1   | . . . |                             |        |         |        |      |
| ATOM 1774 | CA  | CA    | . GLU GLU GLU A A 237 237 . | 92.634 | 119.305 | 37.560 | 1.00 |
| 14.68     | 1   | . . . |                             |        |         |        |      |
| ATOM 1775 | CB  | CB    | . GLU GLU GLU A A 237 237 . | 92.017 | 120.342 | 38.508 | 1.00 |
| 16.30     | 1   | . . . |                             |        |         |        |      |
| ATOM 1776 | CG  | CG    | . GLU GLU GLU A A 237 237 . | 92.652 | 121.758 | 38.462 | 1.00 |
| 22.07     | 1   | . . . |                             |        |         |        |      |
| ATOM 1777 | CD  | CD    | . GLU GLU GLU A A 237 237 . | 94.010 | 121.873 | 39.174 | 1.00 |
| 26.16     | 1   | . . . |                             |        |         |        |      |
| ATOM 1778 | OE1 | OE1   | . GLU GLU GLU A A 237 237 . | 95.009 | 121.246 | 38.728 | 1.00 |
| 25.21     | 1   | . . . |                             |        |         |        |      |
| ATOM 1779 | OE2 | OE2   | . GLU GLU GLU A A 237 237 . | 94.079 | 122.633 | 40.175 | 1.00 |
| 30.82     | 1   | . . . |                             |        |         |        |      |
| ATOM 1780 | C   | C     | . GLU GLU GLU A A 237 237 . | 91.679 | 118.157 | 37.308 | 1.00 |
| 13.64     | 1   | . . . |                             |        |         |        |      |
| ATOM 1781 | O   | O     | . GLU GLU GLU A A 237 237 . | 91.061 | 117.667 | 38.220 | 1.00 |
| 14.88     | 1   | . . . |                             |        |         |        |      |
| ATOM 1782 | N   | N     | . LYS LYS LYS A A 238 238 . | 91.607 | 117.646 | 36.083 | 1.00 |
| 8.82      | 1   | . . . |                             |        |         |        |      |
| ATOM 1783 | CA  | CA    | . LYS LYS LYS A A 238 238 . | 90.508 | 116.721 | 35.826 | 1.00 |
| 8.15      | 1   | . . . |                             |        |         |        |      |
| ATOM 1784 | CB  | CB    | . LYS LYS LYS A A 238 238 . | 89.409 | 117.477 | 35.147 | 1.00 |
| 9.17      | 1   | . . . |                             |        |         |        |      |
| ATOM 1785 | CG  | CG    | . LYS LYS LYS A A 238 238 . | 88.650 | 118.426 | 36.066 | 1.00 |
| 10.33     | 1   | . . . |                             |        |         |        |      |
| ATOM 1786 | CD  | CD    | . LYS LYS LYS A A 238 238 . | 87.345 | 118.860 | 35.380 | 1.00 |
| 12.23     | 1   | . . . |                             |        |         |        |      |
| ATOM 1787 | CE  | CE    | . LYS LYS LYS A A 238 238 . | 86.552 | 119.918 | 36.174 | 1.00 |
| 17.03     | 1   | . . . |                             |        |         |        |      |
| ATOM 1788 | NZ  | NZ    | . LYS LYS LYS A A 238 238 . | 87.359 | 121.136 | 36.446 | 1.00 |
| 21.59     | 1   | . . . |                             |        |         |        |      |
| ATOM 1789 | C   | C     | . LYS LYS LYS A A 238 238 . | 90.863 | 115.524 | 34.952 | 1.00 |
| 5.05      | 1   | . . . |                             |        |         |        |      |
| ATOM 1790 | O   | O     | . LYS LYS LYS A A 238 238 . | 90.062 | 114.607 | 34.836 | 1.00 |
| 6.29      | 1   | . . . |                             |        |         |        |      |
| ATOM 1791 | N   | N     | . ILE ILE ILE A A 239 239 . | 92.035 | 115.551 | 34.357 | 1.00 |
| 4.50      | 1   | . . . |                             |        |         |        |      |
| ATOM 1792 | CA  | CA    | . ILE ILE ILE A A 239 239 . | 92.498 | 114.495 | 33.463 | 1.00 |
| 3.40      | 1   | . . . |                             |        |         |        |      |
| ATOM 1793 | CB  | CB    | . ILE ILE ILE A A 239 239 . | 92.541 | 115.048 | 32.024 | 1.00 |
| 2.74      | 1   | . . . |                             |        |         |        |      |
| ATOM 1794 | CG1 | CG1   | . ILE ILE ILE A A 239 239 . | 91.168 | 115.515 | 31.609 | 1.00 |
| 2.60      | 1   | . . . |                             |        |         |        |      |
| ATOM 1795 | CD1 | CD1   | . ILE ILE ILE A A 239 239 . | 91.105 | 116.034 | 30.232 | 1.00 |
| 5.85      | 1   | . . . |                             |        |         |        |      |
| ATOM 1796 | CG2 | CG2   | . ILE ILE ILE A A 239 239 . | 93.086 | 113.958 | 31.024 | 1.00 |
| 5.52      | 1   | . . . |                             |        |         |        |      |
| ATOM 1797 | C   | C     | . ILE ILE ILE A A 239 239 . | 93.886 | 114.125 | 33.895 | 1.00 |
| 3.66      | 1   | . . . |                             |        |         |        |      |

|           |       |     |                   |         |           |         |        |      |
|-----------|-------|-----|-------------------|---------|-----------|---------|--------|------|
| ATOM 1798 | O     | O   | . ILE ILE ILE A A | 239 239 | . 94.739  | 114.983 | 34.100 | 1.00 |
| 5.49      | 1 . . |     |                   |         |           |         |        |      |
| ATOM 1799 | N     | N   | . VAL VAL VAL A A | 240 240 | . 94.118  | 112.837 | 34.025 | 1.00 |
| 2.87      | 1 . . |     |                   |         |           |         |        |      |
| ATOM 1800 | CA    | CA  | . VAL VAL VAL A A | 240 240 | . 95.440  | 112.277 | 34.434 | 1.00 |
| 3.48      | 1 . . |     |                   |         |           |         |        |      |
| ATOM 1801 | CB    | CB  | . VAL VAL VAL A A | 240 240 | . 95.352  | 111.563 | 35.790 | 1.00 |
| 3.36      | 1 . . |     |                   |         |           |         |        |      |
| ATOM 1802 | CG1   | CG1 | . VAL VAL VAL A A | 240 240 | . 95.069  | 112.575 | 36.865 | 1.00 |
| 8.88      | 1 . . |     |                   |         |           |         |        |      |
| ATOM 1803 | CG2   | CG2 | . VAL VAL VAL A A | 240 240 | . 94.255  | 110.387 | 35.773 | 1.00 |
| 5.01      | 1 . . |     |                   |         |           |         |        |      |
| ATOM 1804 | C     | C   | . VAL VAL VAL A A | 240 240 | . 95.926  | 111.360 | 33.341 | 1.00 |
| 2.89      | 1 . . |     |                   |         |           |         |        |      |
| ATOM 1805 | O     | O   | . VAL VAL VAL A A | 240 240 | . 95.184  | 111.143 | 32.365 | 1.00 |
| 4.54      | 1 . . |     |                   |         |           |         |        |      |
| ATOM 1806 | N     | N   | . ILE ILE ILE A A | 241 241 | . 97.084  | 110.741 | 33.543 | 1.00 |
| 2.90      | 1 . . |     |                   |         |           |         |        |      |
| ATOM 1807 | CA    | CA  | . ILE ILE ILE A A | 241 241 | . 97.751  | 110.026 | 32.481 | 1.00 |
| 2.92      | 1 . . |     |                   |         |           |         |        |      |
| ATOM 1808 | CB    | CB  | . ILE ILE ILE A A | 241 241 | . 99.105  | 110.668 | 32.040 | 1.00 |
| 3.58      | 1 . . |     |                   |         |           |         |        |      |
| ATOM 1809 | CG1   | CG1 | . ILE ILE ILE A A | 241 241 | . 98.896  | 112.104 | 31.505 | 1.00 |
| 2.94      | 1 . . |     |                   |         |           |         |        |      |
| ATOM 1810 | CD1   | CD1 | . ILE ILE ILE A A | 241 241 | . 100.227 | 112.904 | 31.264 | 1.00 |
| 4.15      | 1 . . |     |                   |         |           |         |        |      |
| ATOM 1811 | CG2   | CG2 | . ILE ILE ILE A A | 241 241 | . 99.845  | 109.794 | 31.025 | 1.00 |
| 4.27      | 1 . . |     |                   |         |           |         |        |      |
| ATOM 1812 | C     | C   | . ILE ILE ILE A A | 241 241 | . 97.984  | 108.539 | 32.804 | 1.00 |
| 3.91      | 1 . . |     |                   |         |           |         |        |      |
| ATOM 1813 | O     | O   | . ILE ILE ILE A A | 241 241 | . 98.268  | 108.169 | 33.929 | 1.00 |
| 5.10      | 1 . . |     |                   |         |           |         |        |      |
| ATOM 1814 | N     | N   | . GLY GLY GLY A A | 242 242 | . 97.788  | 107.701 | 31.777 | 1.00 |
| 4.27      | 1 . . |     |                   |         |           |         |        |      |
| ATOM 1815 | CA    | CA  | . GLY GLY GLY A A | 242 242 | . 98.111  | 106.292 | 31.949 | 1.00 |
| 3.03      | 1 . . |     |                   |         |           |         |        |      |
| ATOM 1816 | C     | C   | . GLY GLY GLY A A | 242 242 | . 99.044  | 105.874 | 30.794 | 1.00 |
| 3.39      | 1 . . |     |                   |         |           |         |        |      |
| ATOM 1817 | O     | O   | . GLY GLY GLY A A | 242 242 | . 99.038  | 106.555 | 29.800 | 1.00 |
| 4.60      | 1 . . |     |                   |         |           |         |        |      |
| ATOM 1818 | N     | N   | . MET MET MET A A | 243 243 | . 99.836  | 104.787 | 30.979 | 1.00 |
| 3.73      | 1 . . |     |                   |         |           |         |        |      |
| ATOM 1819 | CA    | CA  | . MET MET MET A A | 243 243 | . 100.768 | 104.270 | 29.992 | 1.00 |
| 3.88      | 1 . . |     |                   |         |           |         |        |      |
| ATOM 1820 | CB    | CB  | . MET MET MET A A | 243 243 | . 102.246 | 104.479 | 30.440 | 1.00 |
| 4.78      | 1 . . |     |                   |         |           |         |        |      |
| ATOM 1821 | CG    | CG  | . MET MET MET A A | 243 243 | . 102.558 | 105.920 | 30.797 | 1.00 |
| 6.23      | 1 . . |     |                   |         |           |         |        |      |
| ATOM 1822 | SD    | SD  | . MET MET MET A A | 243 243 | . 104.189 | 106.299 | 31.383 | 1.00 |
| 8.39      | 1 . . |     |                   |         |           |         |        |      |
| ATOM 1823 | CE    | CE  | . MET MET MET A A | 243 243 | . 105.245 | 105.656 | 30.096 | 1.00 |
| 13.21     | 1 . . |     |                   |         |           |         |        |      |
| ATOM 1824 | C     | C   | . MET MET MET A A | 243 243 | . 100.570 | 102.794 | 29.793 | 1.00 |
| 4.51      | 1 . . |     |                   |         |           |         |        |      |







|           |       |     |                   |         |                  |        |      |
|-----------|-------|-----|-------------------|---------|------------------|--------|------|
| ATOM 1879 | CB    | CB  | . TYR TYR TYR A A | 251 251 | . 112.079 91.951 | 26.715 | 1.00 |
| 8.69      | 1 . . |     |                   |         |                  |        |      |
| ATOM 1880 | CG    | CG  | . TYR TYR TYR A A | 251 251 | . 112.837 91.135 | 27.738 | 1.00 |
| 9.57      | 1 . . |     |                   |         |                  |        |      |
| ATOM 1881 | CD1   | CD1 | . TYR TYR TYR A A | 251 251 | . 113.509 91.754 | 28.850 | 1.00 |
| 11.60     | 1 . . |     |                   |         |                  |        |      |
| ATOM 1882 | CE1   | CE1 | . TYR TYR TYR A A | 251 251 | . 114.199 90.987 | 29.769 | 1.00 |
| 12.94     | 1 . . |     |                   |         |                  |        |      |
| ATOM 1883 | CZ    | CZ  | . TYR TYR TYR A A | 251 251 | . 114.116 89.588 | 29.675 | 1.00 |
| 16.21     | 1 . . |     |                   |         |                  |        |      |
| ATOM 1884 | OH    | OH  | . TYR TYR TYR A A | 251 251 | . 114.738 88.781 | 30.567 | 1.00 |
| 20.78     | 1 . . |     |                   |         |                  |        |      |
| ATOM 1885 | CE2   | CE2 | . TYR TYR TYR A A | 251 251 | . 113.458 88.954 | 28.643 | 1.00 |
| 14.52     | 1 . . |     |                   |         |                  |        |      |
| ATOM 1886 | CD2   | CD2 | . TYR TYR TYR A A | 251 251 | . 112.788 89.711 | 27.683 | 1.00 |
| 12.06     | 1 . . |     |                   |         |                  |        |      |
| ATOM 1887 | C     | C   | . TYR TYR TYR A A | 251 251 | . 113.921 92.166 | 25.017 | 1.00 |
| 11.97     | 1 . . |     |                   |         |                  |        |      |
| ATOM 1888 | O     | O   | . TYR TYR TYR A A | 251 251 | . 113.534 91.439 | 24.062 | 1.00 |
| 10.12     | 1 . . |     |                   |         |                  |        |      |
| ATOM 1889 | N     | N   | . ARG ARG ARG A A | 252 252 | . 115.202 92.394 | 25.334 | 1.00 |
| 13.46     | 1 . . |     |                   |         |                  |        |      |
| ATOM 1890 | CA    | CA  | . ARG ARG ARG A A | 252 252 | . 116.316 91.886 | 24.526 | 1.00 |
| 18.02     | 1 . . |     |                   |         |                  |        |      |
| ATOM 1891 | CB    | CB  | . ARG ARG ARG A A | 252 252 | . 116.899 92.982 | 23.613 | 1.00 |
| 18.00     | 1 . . |     |                   |         |                  |        |      |
| ATOM 1892 | CG    | CG  | . ARG ARG ARG A A | 252 252 | . 115.919 93.706 | 22.681 | 1.00 |
| 16.38     | 1 . . |     |                   |         |                  |        |      |
| ATOM 1893 | CD    | CD  | . ARG ARG ARG A A | 252 252 | . 115.462 92.794 | 21.557 | 1.00 |
| 14.08     | 1 . . |     |                   |         |                  |        |      |
| ATOM 1894 | NE    | NE  | . ARG ARG ARG A A | 252 252 | . 114.580 93.491 | 20.625 | 1.00 |
| 14.90     | 1 . . |     |                   |         |                  |        |      |
| ATOM 1895 | CZ    | CZ  | . ARG ARG ARG A A | 252 252 | . 113.250 93.428 | 20.686 | 1.00 |
| 13.25     | 1 . . |     |                   |         |                  |        |      |
| ATOM 1896 | NH1   | NH1 | . ARG ARG ARG A A | 252 252 | . 112.668 92.623 | 21.577 | 1.00 |
| 11.64     | 1 . . |     |                   |         |                  |        |      |
| ATOM 1897 | NH2   | NH2 | . ARG ARG ARG A A | 252 252 | . 112.506 94.111 | 19.797 | 1.00 |
| 14.30     | 1 . . |     |                   |         |                  |        |      |
| ATOM 1898 | C     | C   | . ARG ARG ARG A A | 252 252 | . 117.425 91.323 | 25.412 | 1.00 |
| 21.16     | 1 . . |     |                   |         |                  |        |      |
| ATOM 1899 | O     | O   | . ARG ARG ARG A A | 252 252 | . 118.013 92.045 | 26.230 | 1.00 |
| 21.34     | 1 . . |     |                   |         |                  |        |      |
| ATOM 1900 | N     | N   | . ASP ASP ASP A A | 253 253 | . 117.698 90.034 | 25.226 | 1.00 |
| 24.11     | 1 . . |     |                   |         |                  |        |      |
| ATOM 1901 | CA    | CA  | . ASP ASP ASP A A | 253 253 | . 118.780 89.332 | 25.923 | 1.00 |
| 25.89     | 1 . . |     |                   |         |                  |        |      |
| ATOM 1902 | CB    | CB  | . ASP ASP ASP A A | 253 253 | . 120.119 89.428 | 25.128 | 1.00 |
| 27.45     | 1 . . |     |                   |         |                  |        |      |
| ATOM 1903 | CG    | CG  | . ASP ASP ASP A A | 253 253 | . 120.952 90.682 | 25.438 | 1.00 |
| 30.04     | 1 . . |     |                   |         |                  |        |      |
| ATOM 1904 | OD1   | OD1 | . ASP ASP ASP A A | 253 253 | . 120.407 91.792 | 25.552 | 1.00 |
| 33.77     | 1 . . |     |                   |         |                  |        |      |
| ATOM 1905 | OD2   | OD2 | . ASP ASP ASP A A | 253 253 | . 122.194 90.550 | 25.534 | 1.00 |
| 32.68     | 1 . . |     |                   |         |                  |        |      |

|           |     |       |                             |         |        |        |      |
|-----------|-----|-------|-----------------------------|---------|--------|--------|------|
| ATOM 1906 | C   | C     | . ASP ASP ASP A A 253 253 . | 118.886 | 89.769 | 27.388 | 1.00 |
| 25.06     | 1   | . . . |                             |         |        |        |      |
| ATOM 1907 | O   | O     | . ASP ASP ASP A A 253 253 . | 119.964 | 90.158 | 27.866 | 1.00 |
| 26.73     | 1   | . . . |                             |         |        |        |      |
| ATOM 1908 | N   | N     | . GLY GLY GLY A A 254 254 . | 117.752 | 89.712 | 28.090 | 1.00 |
| 23.50     | 1   | . . . |                             |         |        |        |      |
| ATOM 1909 | CA  | CA    | . GLY GLY GLY A A 254 254 . | 117.706 | 90.079 | 29.508 | 1.00 |
| 19.84     | 1   | . . . |                             |         |        |        |      |
| ATOM 1910 | C   | C     | . GLY GLY GLY A A 254 254 . | 117.701 | 91.576 | 29.816 | 1.00 |
| 18.03     | 1   | . . . |                             |         |        |        |      |
| ATOM 1911 | O   | O     | . GLY GLY GLY A A 254 254 . | 117.553 | 91.934 | 30.980 | 1.00 |
| 17.98     | 1   | . . . |                             |         |        |        |      |
| ATOM 1912 | N   | N     | . LYS LYS LYS A A 255 255 . | 117.872 | 92.429 | 28.801 | 1.00 |
| 15.18     | 1   | . . . |                             |         |        |        |      |
| ATOM 1913 | CA  | CA    | . LYS LYS LYS A A 255 255 . | 117.770 | 93.918 | 28.939 | 1.00 |
| 14.54     | 1   | . . . |                             |         |        |        |      |
| ATOM 1914 | CB  | CB    | . LYS LYS LYS A A 255 255 . | 119.083 | 94.590 | 28.499 | 1.00 |
| 14.34     | 1   | . . . |                             |         |        |        |      |
| ATOM 1915 | CG  | CG    | . LYS LYS LYS A A 255 255 . | 120.337 | 93.968 | 29.136 | 1.00 |
| 16.68     | 1   | . . . |                             |         |        |        |      |
| ATOM 1916 | CD  | CD    | . LYS LYS LYS A A 255 255 . | 121.580 | 94.741 | 28.712 | 1.00 |
| 22.50     | 1   | . . . |                             |         |        |        |      |
| ATOM 1917 | CE  | CE    | . LYS LYS LYS A A 255 255 . | 121.684 | 96.064 | 29.474 | 1.00 |
| 24.98     | 1   | . . . |                             |         |        |        |      |
| ATOM 1918 | NZ  | NZ    | . LYS LYS LYS A A 255 255 . | 123.106 | 96.357 | 29.693 | 1.00 |
| 26.59     | 1   | . . . |                             |         |        |        |      |
| ATOM 1919 | C   | C     | . LYS LYS LYS A A 255 255 . | 116.611 | 94.520 | 28.140 | 1.00 |
| 13.37     | 1   | . . . |                             |         |        |        |      |
| ATOM 1920 | O   | O     | . LYS LYS LYS A A 255 255 . | 115.798 | 93.806 | 27.556 | 1.00 |
| 13.43     | 1   | . . . |                             |         |        |        |      |
| ATOM 1921 | N   | N     | . TYR TYR TYR A A 256 256 . | 116.544 | 95.843 | 28.063 | 1.00 |
| 12.34     | 1   | . . . |                             |         |        |        |      |
| ATOM 1922 | CA  | CA    | . TYR TYR TYR A A 256 256 . | 115.420 | 96.492 | 27.396 | 1.00 |
| 10.80     | 1   | . . . |                             |         |        |        |      |
| ATOM 1923 | CB  | CB    | . TYR TYR TYR A A 256 256 . | 114.461 | 97.099 | 28.455 | 1.00 |
| 9.86      | 1   | . . . |                             |         |        |        |      |
| ATOM 1924 | CG  | CG    | . TYR TYR TYR A A 256 256 . | 113.768 | 96.076 | 29.331 | 1.00 |
| 7.16      | 1   | . . . |                             |         |        |        |      |
| ATOM 1925 | CD1 | CD1   | . TYR TYR TYR A A 256 256 . | 112.527 | 95.540 | 28.947 | 1.00 |
| 5.19      | 1   | . . . |                             |         |        |        |      |
| ATOM 1926 | CE1 | CE1   | . TYR TYR TYR A A 256 256 . | 111.890 | 94.655 | 29.700 | 1.00 |
| 9.98      | 1   | . . . |                             |         |        |        |      |
| ATOM 1927 | CZ  | CZ    | . TYR TYR TYR A A 256 256 . | 112.445 | 94.235 | 30.902 | 1.00 |
| 6.62      | 1   | . . . |                             |         |        |        |      |
| ATOM 1928 | OH  | OH    | . TYR TYR TYR A A 256 256 . | 111.771 | 93.286 | 31.625 | 1.00 |
| 6.76      | 1   | . . . |                             |         |        |        |      |
| ATOM 1929 | CE2 | CE2   | . TYR TYR TYR A A 256 256 . | 113.663 | 94.756 | 31.345 | 1.00 |
| 6.71      | 1   | . . . |                             |         |        |        |      |
| ATOM 1930 | CD2 | CD2   | . TYR TYR TYR A A 256 256 . | 114.323 | 95.639 | 30.551 | 1.00 |
| 10.15     | 1   | . . . |                             |         |        |        |      |
| ATOM 1931 | C   | C     | . TYR TYR TYR A A 256 256 . | 115.925 | 97.587 | 26.419 | 1.00 |
| 10.87     | 1   | . . . |                             |         |        |        |      |
| ATOM 1932 | O   | O     | . TYR TYR TYR A A 256 256 . | 116.806 | 98.403 | 26.740 | 1.00 |
| 10.37     | 1   | . . . |                             |         |        |        |      |

|           |       |     |                                                         |
|-----------|-------|-----|---------------------------------------------------------|
| ATOM 1933 | N     | N   | . ASP ASP ASP A A 257 257 . 115.339 97.568 25.216 1.00  |
| 10.58     | 1 . . |     |                                                         |
| ATOM 1934 | CA    | CA  | . ASP ASP ASP A A 257 257 . 115.719 98.423 24.109 1.00  |
| 10.88     | 1 . . |     |                                                         |
| ATOM 1935 | CB    | CB  | . ASP ASP ASP A A 257 257 . 115.930 97.554 22.861 1.00  |
| 11.26     | 1 . . |     |                                                         |
| ATOM 1936 | CG    | CG  | . ASP ASP ASP A A 257 257 . 116.488 98.337 21.703 1.00  |
| 12.29     | 1 . . |     |                                                         |
| ATOM 1937 | OD1   | OD1 | . ASP ASP ASP A A 257 257 . 116.831 99.530 21.912 1.00  |
| 16.34     | 1 . . |     |                                                         |
| ATOM 1938 | OD2   | OD2 | . ASP ASP ASP A A 257 257 . 116.555 97.782 20.581 1.00  |
| 12.76     | 1 . . |     |                                                         |
| ATOM 1939 | C     | C   | . ASP ASP ASP A A 257 257 . 114.680 99.523 23.794 1.00  |
| 10.37     | 1 . . |     |                                                         |
| ATOM 1940 | O     | O   | . ASP ASP ASP A A 257 257 . 113.783 99.341 22.962 1.00  |
| 10.35     | 1 . . |     |                                                         |
| ATOM 1941 | N     | N   | . LEU LEU LEU A A 258 258 . 114.903 100.720 24.365 1.00 |
| 11.06     | 1 . . |     |                                                         |
| ATOM 1942 | CA    | CA  | . LEU LEU LEU A A 258 258 . 114.035 101.890 24.092 1.00 |
| 10.17     | 1 . . |     |                                                         |
| ATOM 1943 | CB    | CB  | . LEU LEU LEU A A 258 258 . 114.026 102.930 25.221 1.00 |
| 8.93      | 1 . . |     |                                                         |
| ATOM 1944 | CG    | CG  | . LEU LEU LEU A A 258 258 . 113.614 102.389 26.591 1.00 |
| 10.90     | 1 . . |     |                                                         |
| ATOM 1945 | CD1   | CD1 | . LEU LEU LEU A A 258 258 . 113.804 103.514 27.623 1.00 |
| 8.42      | 1 . . |     |                                                         |
| ATOM 1946 | CD2   | CD2 | . LEU LEU LEU A A 258 258 . 112.179 101.957 26.456 1.00 |
| 13.20     | 1 . . |     |                                                         |
| ATOM 1947 | C     | C   | . LEU LEU LEU A A 258 258 . 114.234 102.550 22.756 1.00 |
| 9.78      | 1 . . |     |                                                         |
| ATOM 1948 | O     | O   | . LEU LEU LEU A A 258 258 . 113.636 103.611 22.481 1.00 |
| 9.03      | 1 . . |     |                                                         |
| ATOM 1949 | N     | N   | . ASP ASP ASP A A 259 259 . 115.013 101.917 21.873 1.00 |
| 8.48      | 1 . . |     |                                                         |
| ATOM 1950 | CA    | CA  | . ASP ASP ASP A A 259 259 . 115.077 102.367 20.513 1.00 |
| 9.91      | 1 . . |     |                                                         |
| ATOM 1951 | CB    | CB  | . ASP ASP ASP A A 259 259 . 116.288 103.306 20.336 1.00 |
| 9.84      | 1 . . |     |                                                         |
| ATOM 1952 | CG    | CG  | . ASP ASP ASP A A 259 259 . 116.253 104.092 19.016 1.00 |
| 13.36     | 1 . . |     |                                                         |
| ATOM 1953 | OD1   | OD1 | . ASP ASP ASP A A 259 259 . 115.260 104.010 18.239 1.00 |
| 14.73     | 1 . . |     |                                                         |
| ATOM 1954 | OD2   | OD2 | . ASP ASP ASP A A 259 259 . 117.248 104.833 18.761 1.00 |
| 16.74     | 1 . . |     |                                                         |
| ATOM 1955 | C     | C   | . ASP ASP ASP A A 259 259 . 115.013 101.162 19.548 1.00 |
| 9.03      | 1 . . |     |                                                         |
| ATOM 1956 | O     | O   | . ASP ASP ASP A A 259 259 . 115.708 101.090 18.507 1.00 |
| 9.00      | 1 . . |     |                                                         |
| ATOM 1957 | N     | N   | . PHE PHE PHE A A 260 260 . 114.122 100.239 19.916 1.00 |
| 9.34      | 1 . . |     |                                                         |
| ATOM 1958 | CA    | CA  | . PHE PHE PHE A A 260 260 . 113.950 98.946 19.231 1.00  |
| 8.33      | 1 . . |     |                                                         |
| ATOM 1959 | CB    | CB  | . PHE PHE PHE A A 260 260 . 113.115 97.968 20.063 1.00  |
| 8.48      | 1 . . |     |                                                         |

|           |       |     |                             |         |         |        |      |
|-----------|-------|-----|-----------------------------|---------|---------|--------|------|
| ATOM 1960 | CG    | CG  | . PHE PHE PHE A A 260 260 . | 111.633 | 98.108  | 19.871 | 1.00 |
| 6.90      | 1 . . |     |                             |         |         |        |      |
| ATOM 1961 | CD1   | CD1 | . PHE PHE PHE A A 260 260 . | 110.906 | 99.044  | 20.592 | 1.00 |
| 6.77      | 1 . . |     |                             |         |         |        |      |
| ATOM 1962 | CE1   | CE1 | . PHE PHE PHE A A 260 260 . | 109.526 | 99.144  | 20.444 | 1.00 |
| 10.21     | 1 . . |     |                             |         |         |        |      |
| ATOM 1963 | CZ    | CZ  | . PHE PHE PHE A A 260 260 . | 108.850 | 98.328  | 19.522 | 1.00 |
| 6.68      | 1 . . |     |                             |         |         |        |      |
| ATOM 1964 | CE2   | CE2 | . PHE PHE PHE A A 260 260 . | 109.544 | 97.428  | 18.815 | 1.00 |
| 9.48      | 1 . . |     |                             |         |         |        |      |
| ATOM 1965 | CD2   | CD2 | . PHE PHE PHE A A 260 260 . | 110.944 | 97.315  | 18.977 | 1.00 |
| 4.98      | 1 . . |     |                             |         |         |        |      |
| ATOM 1966 | C     | C   | . PHE PHE PHE A A 260 260 . | 113.520 | 98.952  | 17.757 | 1.00 |
| 9.91      | 1 . . |     |                             |         |         |        |      |
| ATOM 1967 | O     | O   | . PHE PHE PHE A A 260 260 . | 113.801 | 97.997  | 17.043 | 1.00 |
| 11.17     | 1 . . |     |                             |         |         |        |      |
| ATOM 1968 | N     | N   | . LYS LYS LYS A A 261 261 . | 112.936 | 100.037 | 17.281 | 1.00 |
| 11.34     | 1 . . |     |                             |         |         |        |      |
| ATOM 1969 | CA    | CA  | . LYS LYS LYS A A 261 261 . | 112.620 | 100.162 | 15.854 | 1.00 |
| 11.37     | 1 . . |     |                             |         |         |        |      |
| ATOM 1970 | CB    | CB  | . LYS LYS LYS A A 261 261 . | 111.360 | 100.971 | 15.638 | 1.00 |
| 10.82     | 1 . . |     |                             |         |         |        |      |
| ATOM 1971 | CG    | CG  | . LYS LYS LYS A A 261 261 . | 110.124 | 100.189 | 16.204 | 1.00 |
| 7.53      | 1 . . |     |                             |         |         |        |      |
| ATOM 1972 | CD    | CD  | . LYS LYS LYS A A 261 261 . | 108.882 | 101.052 | 16.227 | 1.00 |
| 4.81      | 1 . . |     |                             |         |         |        |      |
| ATOM 1973 | CE    | CE  | . LYS LYS LYS A A 261 261 . | 108.817 | 101.987 | 17.486 | 1.00 |
| 3.77      | 1 . . |     |                             |         |         |        |      |
| ATOM 1974 | NZ    | NZ  | . LYS LYS LYS A A 261 261 . | 107.517 | 102.790 | 17.567 | 1.00 |
| 7.25      | 1 . . |     |                             |         |         |        |      |
| ATOM 1975 | C     | C   | . LYS LYS LYS A A 261 261 . | 113.767 | 100.729 | 15.046 | 1.00 |
| 12.21     | 1 . . |     |                             |         |         |        |      |
| ATOM 1976 | O     | O   | . LYS LYS LYS A A 261 261 . | 113.607 | 101.010 | 13.859 | 1.00 |
| 13.91     | 1 . . |     |                             |         |         |        |      |
| ATOM 1977 | N     | N   | . SER SER SER A A 262 262 . | 114.905 | 100.945 | 15.698 | 1.00 |
| 12.46     | 1 . . |     |                             |         |         |        |      |
| ATOM 1978 | CA    | CA  | . SER SER SER A A 262 262 . | 116.084 | 101.388 | 14.996 | 1.00 |
| 14.15     | 1 . . |     |                             |         |         |        |      |
| ATOM 1979 | CB    | CB  | . SER SER SER A A 262 262 . | 116.791 | 102.478 | 15.785 | 1.00 |
| 13.43     | 1 . . |     |                             |         |         |        |      |
| ATOM 1980 | OG    | OG  | . SER SER SER A A 262 262 . | 116.026 | 103.652 | 15.752 | 1.00 |
| 16.25     | 1 . . |     |                             |         |         |        |      |
| ATOM 1981 | C     | C   | . SER SER SER A A 262 262 . | 117.025 | 100.185 | 14.798 | 1.00 |
| 14.45     | 1 . . |     |                             |         |         |        |      |
| ATOM 1982 | O     | O   | . SER SER SER A A 262 262 . | 116.995 | 99.263  | 15.578 | 1.00 |
| 12.46     | 1 . . |     |                             |         |         |        |      |
| ATOM 1983 | N     | N   | . PRO PRO PRO A A 263 263 . | 117.873 | 100.208 | 13.744 | 1.00 |
| 16.78     | 1 . . |     |                             |         |         |        |      |
| ATOM 1984 | CA    | CA  | . PRO PRO PRO A A 263 263 . | 118.721 | 99.026  | 13.488 | 1.00 |
| 17.96     | 1 . . |     |                             |         |         |        |      |
| ATOM 1985 | CB    | CB  | . PRO PRO PRO A A 263 263 . | 119.812 | 99.572  | 12.563 | 1.00 |
| 17.46     | 1 . . |     |                             |         |         |        |      |
| ATOM 1986 | CG    | CG  | . PRO PRO PRO A A 263 263 . | 119.369 | 100.906 | 12.113 | 1.00 |
| 18.58     | 1 . . |     |                             |         |         |        |      |

|           |         |     |                                                         |
|-----------|---------|-----|---------------------------------------------------------|
| ATOM 1987 | CD      | CD  | . PRO PRO PRO A A 263 263 . 118.180 101.341 12.855 1.00 |
| 17.60     | 1 . . . |     |                                                         |
| ATOM 1988 | C       | C   | . PRO PRO PRO A A 263 263 . 119.361 98.529 14.781 1.00  |
| 19.50     | 1 . . . |     |                                                         |
| ATOM 1989 | O       | O   | . PRO PRO PRO A A 263 263 . 119.791 99.333 15.588 1.00  |
| 19.46     | 1 . . . |     |                                                         |
| ATOM 1990 | N       | N   | . THR THR THR A A 264 264 . 119.451 97.219 14.972 1.00  |
| 20.90     | 1 . . . |     |                                                         |
| ATOM 1991 | CA      | CA  | . THR THR THR A A 264 264 . 119.906 96.687 16.262 1.00  |
| 22.84     | 1 . . . |     |                                                         |
| ATOM 1992 | CB      | CB  | . THR THR THR A A 264 264 . 119.947 95.154 16.317 1.00  |
| 22.61     | 1 . . . |     |                                                         |
| ATOM 1993 | OG1     | OG1 | . THR THR THR A A 264 264 . 118.675 94.617 15.888 1.00  |
| 26.14     | 1 . . . |     |                                                         |
| ATOM 1994 | CG2     | CG2 | . THR THR THR A A 264 264 . 120.225 94.693 17.743 1.00  |
| 21.89     | 1 . . . |     |                                                         |
| ATOM 1995 | C       | C   | . THR THR THR A A 264 264 . 121.259 97.238 16.685 1.00  |
| 22.71     | 1 . . . |     |                                                         |
| ATOM 1996 | O       | O   | . THR THR THR A A 264 264 . 122.184 97.356 15.885 1.00  |
| 24.47     | 1 . . . |     |                                                         |
| ATOM 1997 | N       | N   | . ASP ASP ASP A A 265 265 . 121.332 97.633 17.946 1.00  |
| 22.85     | 1 . . . |     |                                                         |
| ATOM 1998 | CA      | CA  | . ASP ASP ASP A A 265 265 . 122.560 98.177 18.548 1.00  |
| 22.91     | 1 . . . |     |                                                         |
| ATOM 1999 | CB      | CB  | . ASP ASP ASP A A 265 265 . 122.864 99.623 18.097 1.00  |
| 23.27     | 1 . . . |     |                                                         |
| ATOM 2000 | CG      | CG  | . ASP ASP ASP A A 265 265 . 124.099 100.219 18.781 1.00 |
| 23.81     | 1 . . . |     |                                                         |
| ATOM 2001 | OD1     | OD1 | . ASP ASP ASP A A 265 265 . 124.646 99.608 19.738 1.00  |
| 24.01     | 1 . . . |     |                                                         |
| ATOM 2002 | OD2     | OD2 | . ASP ASP ASP A A 265 265 . 124.533 101.306 18.358 1.00 |
| 24.37     | 1 . . . |     |                                                         |
| ATOM 2003 | C       | C   | . ASP ASP ASP A A 265 265 . 122.526 98.019 20.085 1.00  |
| 22.24     | 1 . . . |     |                                                         |
| ATOM 2004 | O       | O   | . ASP ASP ASP A A 265 265 . 122.105 98.925 20.821 1.00  |
| 22.10     | 1 . . . |     |                                                         |
| ATOM 2005 | N       | N   | . PRO PRO PRO A A 266 266 . 123.016 96.860 20.574 1.00  |
| 21.69     | 1 . . . |     |                                                         |
| ATOM 2006 | CA      | CA  | . PRO PRO PRO A A 266 266 . 122.925 96.470 21.977 1.00  |
| 21.36     | 1 . . . |     |                                                         |
| ATOM 2007 | CB      | CB  | . PRO PRO PRO A A 266 266 . 123.556 95.061 22.019 1.00  |
| 21.18     | 1 . . . |     |                                                         |
| ATOM 2008 | CG      | CG  | . PRO PRO PRO A A 266 266 . 123.912 94.745 20.622 1.00  |
| 22.06     | 1 . . . |     |                                                         |
| ATOM 2009 | CD      | CD  | . PRO PRO PRO A A 266 266 . 123.905 95.982 19.812 1.00  |
| 21.94     | 1 . . . |     |                                                         |
| ATOM 2010 | C       | C   | . PRO PRO PRO A A 266 266 . 123.622 97.410 22.928 1.00  |
| 20.81     | 1 . . . |     |                                                         |
| ATOM 2011 | O       | O   | . PRO PRO PRO A A 266 266 . 123.280 97.444 24.119 1.00  |
| 20.91     | 1 . . . |     |                                                         |
| ATOM 2012 | N       | N   | . SER SER SER A A 267 267 . 124.574 98.189 22.423 1.00  |
| 21.59     | 1 . . . |     |                                                         |
| ATOM 2013 | CA      | CA  | . SER SER SER A A 267 267 . 125.217 99.197 23.280 1.00  |
| 21.75     | 1 . . . |     |                                                         |

|           |       |     |                             |         |         |        |      |
|-----------|-------|-----|-----------------------------|---------|---------|--------|------|
| ATOM 2014 | CB    | CB  | . SER SER SER A A 267 267 . | 126.317 | 99.988  | 22.548 | 1.00 |
| 22.47     | 1 . . |     |                             |         |         |        |      |
| ATOM 2015 | OG    | OG  | . SER SER SER A A 267 267 . | 125.836 | 101.187 | 21.978 | 1.00 |
| 24.67     | 1 . . |     |                             |         |         |        |      |
| ATOM 2016 | C     | C   | . SER SER SER A A 267 267 . | 124.182 | 100.144 | 23.940 | 1.00 |
| 21.26     | 1 . . |     |                             |         |         |        |      |
| ATOM 2017 | O     | O   | . SER SER SER A A 267 267 . | 124.418 | 100.671 | 25.015 | 1.00 |
| 22.09     | 1 . . |     |                             |         |         |        |      |
| ATOM 2018 | N     | N   | . ARG ARG ARG A A 268 268 . | 123.027 | 100.334 | 23.298 | 1.00 |
| 19.85     | 1 . . |     |                             |         |         |        |      |
| ATOM 2019 | CA    | CA  | . ARG ARG ARG A A 268 268 . | 122.036 | 101.259 | 23.814 | 1.00 |
| 17.39     | 1 . . |     |                             |         |         |        |      |
| ATOM 2020 | CB    | CB  | . ARG ARG ARG A A 268 268 . | 121.315 | 101.961 | 22.663 | 1.00 |
| 16.13     | 1 . . |     |                             |         |         |        |      |
| ATOM 2021 | CG    | CG  | . ARG ARG ARG A A 268 268 . | 120.161 | 101.152 | 22.126 | 1.00 |
| 16.69     | 1 . . |     |                             |         |         |        |      |
| ATOM 2022 | CD    | CD  | . ARG ARG ARG A A 268 268 . | 119.890 | 101.494 | 20.679 | 1.00 |
| 15.33     | 1 . . |     |                             |         |         |        |      |
| ATOM 2023 | NE    | NE  | . ARG ARG ARG A A 268 268 . | 119.010 | 100.480 | 20.103 | 1.00 |
| 14.44     | 1 . . |     |                             |         |         |        |      |
| ATOM 2024 | CZ    | CZ  | . ARG ARG ARG A A 268 268 . | 118.913 | 100.217 | 18.808 | 1.00 |
| 12.85     | 1 . . |     |                             |         |         |        |      |
| ATOM 2025 | NH1   | NH1 | . ARG ARG ARG A A 268 268 . | 118.104 | 99.236  | 18.373 | 1.00 |
| 14.18     | 1 . . |     |                             |         |         |        |      |
| ATOM 2026 | NH2   | NH2 | . ARG ARG ARG A A 268 268 . | 119.605 | 100.951 | 17.945 | 1.00 |
| 18.62     | 1 . . |     |                             |         |         |        |      |
| ATOM 2027 | C     | C   | . ARG ARG ARG A A 268 268 . | 121.037 | 100.613 | 24.770 | 1.00 |
| 17.04     | 1 . . |     |                             |         |         |        |      |
| ATOM 2028 | O     | O   | . ARG ARG ARG A A 268 268 . | 120.153 | 101.287 | 25.335 | 1.00 |
| 15.92     | 1 . . |     |                             |         |         |        |      |
| ATOM 2029 | N     | N   | . TYR TYR TYR A A 269 269 . | 121.174 | 99.309  | 24.989 | 1.00 |
| 16.52     | 1 . . |     |                             |         |         |        |      |
| ATOM 2030 | CA    | CA  | . TYR TYR TYR A A 269 269 . | 120.250 | 98.608  | 25.909 | 1.00 |
| 16.19     | 1 . . |     |                             |         |         |        |      |
| ATOM 2031 | CB    | CB  | . TYR TYR TYR A A 269 269 . | 120.416 | 97.104  | 25.808 | 1.00 |
| 16.25     | 1 . . |     |                             |         |         |        |      |
| ATOM 2032 | CG    | CG  | . TYR TYR TYR A A 269 269 . | 120.112 | 96.470  | 24.464 | 1.00 |
| 15.71     | 1 . . |     |                             |         |         |        |      |
| ATOM 2033 | CD1   | CD1 | . TYR TYR TYR A A 269 269 . | 119.615 | 97.201  | 23.366 | 1.00 |
| 14.36     | 1 . . |     |                             |         |         |        |      |
| ATOM 2034 | CE1   | CE1 | . TYR TYR TYR A A 269 269 . | 119.383 | 96.578  | 22.148 | 1.00 |
| 14.48     | 1 . . |     |                             |         |         |        |      |
| ATOM 2035 | CZ    | CZ  | . TYR TYR TYR A A 269 269 . | 119.561 | 95.206  | 22.024 | 1.00 |
| 16.62     | 1 . . |     |                             |         |         |        |      |
| ATOM 2036 | OH    | OH  | . TYR TYR TYR A A 269 269 . | 119.284 | 94.571  | 20.813 | 1.00 |
| 19.26     | 1 . . |     |                             |         |         |        |      |
| ATOM 2037 | CE2   | CE2 | . TYR TYR TYR A A 269 269 . | 120.045 | 94.469  | 23.095 | 1.00 |
| 16.27     | 1 . . |     |                             |         |         |        |      |
| ATOM 2038 | CD2   | CD2 | . TYR TYR TYR A A 269 269 . | 120.309 | 95.110  | 24.306 | 1.00 |
| 18.07     | 1 . . |     |                             |         |         |        |      |
| ATOM 2039 | C     | C   | . TYR TYR TYR A A 269 269 . | 120.406 | 99.034  | 27.370 | 1.00 |
| 14.40     | 1 . . |     |                             |         |         |        |      |
| ATOM 2040 | O     | O   | . TYR TYR TYR A A 269 269 . | 121.492 | 99.368  | 27.806 | 1.00 |
| 15.00     | 1 . . |     |                             |         |         |        |      |



|           |       |     |                                                         |
|-----------|-------|-----|---------------------------------------------------------|
| ATOM 2041 | N     | N   | . ILE ILE ILE A A 270 270 . 119.318 99.011 28.117 1.00  |
| 13.00     | 1 . . |     |                                                         |
| ATOM 2042 | CA    | CA  | . ILE ILE ILE A A 270 270 . 119.350 99.359 29.538 1.00  |
| 10.47     | 1 . . |     |                                                         |
| ATOM 2043 | CB    | CB  | . ILE ILE ILE A A 270 270 . 118.555 100.710 29.881 1.00 |
| 11.26     | 1 . . |     |                                                         |
| ATOM 2044 | CG1   | CG1 | . ILE ILE ILE A A 270 270 . 117.053 100.537 29.689 1.00 |
| 11.38     | 1 . . |     |                                                         |
| ATOM 2045 | CD1   | CD1 | . ILE ILE ILE A A 270 270 . 116.148 101.684 30.254 1.00 |
| 12.89     | 1 . . |     |                                                         |
| ATOM 2046 | CG2   | CG2 | . ILE ILE ILE A A 270 270 . 119.174 101.934 29.152 1.00 |
| 11.47     | 1 . . |     |                                                         |
| ATOM 2047 | C     | C   | . ILE ILE ILE A A 270 270 . 118.815 98.212 30.396 1.00  |
| 10.68     | 1 . . |     |                                                         |
| ATOM 2048 | O     | O   | . ILE ILE ILE A A 270 270 . 118.120 97.318 29.881 1.00  |
| 11.15     | 1 . . |     |                                                         |
| ATOM 2049 | N     | N   | . THR THR THR A A 271 271 . 119.052 98.251 31.702 1.00  |
| 9.79      | 1 . . |     |                                                         |
| ATOM 2050 | CA    | CA  | . THR THR THR A A 271 271 . 118.607 97.187 32.580 1.00  |
| 10.30     | 1 . . |     |                                                         |
| ATOM 2051 | CB    | CB  | . THR THR THR A A 271 271 . 119.539 97.109 33.815 1.00  |
| 11.46     | 1 . . |     |                                                         |
| ATOM 2052 | OG1   | OG1 | . THR THR THR A A 271 271 . 119.456 98.312 34.627 1.00  |
| 10.27     | 1 . . |     |                                                         |
| ATOM 2053 | CG2   | CG2 | . THR THR THR A A 271 271 . 120.979 96.976 33.349 1.00  |
| 13.56     | 1 . . |     |                                                         |
| ATOM 2054 | C     | C   | . THR THR THR A A 271 271 . 117.180 97.403 33.084 1.00  |
| 9.88      | 1 . . |     |                                                         |
| ATOM 2055 | O     | O   | . THR THR THR A A 271 271 . 116.660 98.521 32.979 1.00  |
| 8.74      | 1 . . |     |                                                         |
| ATOM 2056 | N     | N   | . GLY GLY GLY A A 272 272 . 116.595 96.346 33.685 1.00  |
| 9.36      | 1 . . |     |                                                         |
| ATOM 2057 | CA    | CA  | . GLY GLY GLY A A 272 272 . 115.336 96.437 34.402 1.00  |
| 9.38      | 1 . . |     |                                                         |
| ATOM 2058 | C     | C   | . GLY GLY GLY A A 272 272 . 115.387 97.572 35.421 1.00  |
| 11.57     | 1 . . |     |                                                         |
| ATOM 2059 | O     | O   | . GLY GLY GLY A A 272 272 . 114.424 98.359 35.546 1.00  |
| 11.51     | 1 . . |     |                                                         |
| ATOM 2060 | N     | N   | . ASP ASP ASP A A 273 273 . 116.486 97.679 36.171 1.00  |
| 11.01     | 1 . . |     |                                                         |
| ATOM 2061 | CA    | CA  | . ASP ASP ASP A A 273 273 . 116.541 98.667 37.241 1.00  |
| 11.31     | 1 . . |     |                                                         |
| ATOM 2062 | CB    | CB  | . ASP ASP ASP A A 273 273 . 117.817 98.566 38.104 1.00  |
| 11.61     | 1 . . |     |                                                         |
| ATOM 2063 | CG    | CG  | . ASP ASP ASP A A 273 273 . 117.722 97.497 39.197 1.00  |
| 14.12     | 1 . . |     |                                                         |
| ATOM 2064 | OD1   | OD1 | . ASP ASP ASP A A 273 273 . 116.654 96.902 39.389 1.00  |
| 21.06     | 1 . . |     |                                                         |
| ATOM 2065 | OD2   | OD2 | . ASP ASP ASP A A 273 273 . 118.734 97.279 39.890 1.00  |
| 16.97     | 1 . . |     |                                                         |
| ATOM 2066 | C     | C   | . ASP ASP ASP A A 273 273 . 116.519 100.091 36.616 1.00 |
| 10.14     | 1 . . |     |                                                         |
| ATOM 2067 | O     | O   | . ASP ASP ASP A A 273 273 . 115.834 101.024 37.102 1.00 |
| 9.51      | 1 . . |     |                                                         |

|           |       |     |                             |         |         |        |      |
|-----------|-------|-----|-----------------------------|---------|---------|--------|------|
| ATOM 2068 | N     | N   | . GLN GLN GLN A A 274 274 . | 117.343 | 100.263 | 35.573 | 1.00 |
| 10.53     | 1 . . |     |                             |         |         |        |      |
| ATOM 2069 | CA    | CA  | . GLN GLN GLN A A 274 274 . | 117.337 | 101.522 | 34.836 | 1.00 |
| 10.03     | 1 . . |     |                             |         |         |        |      |
| ATOM 2070 | CB    | CB  | . GLN GLN GLN A A 274 274 . | 118.391 | 101.513 | 33.721 | 1.00 |
| 11.04     | 1 . . |     |                             |         |         |        |      |
| ATOM 2071 | CG    | CG  | . GLN GLN GLN A A 274 274 . | 119.777 | 101.651 | 34.306 | 1.00 |
| 11.30     | 1 . . |     |                             |         |         |        |      |
| ATOM 2072 | CD    | CD  | . GLN GLN GLN A A 274 274 . | 120.858 | 101.428 | 33.308 | 1.00 |
| 12.58     | 1 . . |     |                             |         |         |        |      |
| ATOM 2073 | OE1   | OE1 | . GLN GLN GLN A A 274 274 . | 120.719 | 100.591 | 32.413 | 1.00 |
| 11.68     | 1 . . |     |                             |         |         |        |      |
| ATOM 2074 | NE2   | NE2 | . GLN GLN GLN A A 274 274 . | 121.985 | 102.170 | 33.457 | 1.00 |
| 10.86     | 1 . . |     |                             |         |         |        |      |
| ATOM 2075 | C     | C   | . GLN GLN GLN A A 274 274 . | 115.949 | 101.911 | 34.314 | 1.00 |
| 10.02     | 1 . . |     |                             |         |         |        |      |
| ATOM 2076 | O     | O   | . GLN GLN GLN A A 274 274 . | 115.564 | 103.072 | 34.399 | 1.00 |
| 9.80      | 1 . . |     |                             |         |         |        |      |
| ATOM 2077 | N     | N   | . LEU LEU LEU A A 275 275 . | 115.195 | 100.918 | 33.851 | 1.00 |
| 8.65      | 1 . . |     |                             |         |         |        |      |
| ATOM 2078 | CA    | CA  | . LEU LEU LEU A A 275 275 . | 113.856 | 101.170 | 33.314 | 1.00 |
| 9.25      | 1 . . |     |                             |         |         |        |      |
| ATOM 2079 | CB    | CB  | . LEU LEU LEU A A 275 275 . | 113.350 | 99.921  | 32.538 | 1.00 |
| 9.49      | 1 . . |     |                             |         |         |        |      |
| ATOM 2080 | CG    | CG  | . LEU LEU LEU A A 275 275 . | 111.994 | 99.948  | 31.800 | 1.00 |
| 9.59      | 1 . . |     |                             |         |         |        |      |
| ATOM 2081 | CD1   | CD1 | . LEU LEU LEU A A 275 275 . | 111.894 | 101.119 | 30.766 | 1.00 |
| 12.29     | 1 . . |     |                             |         |         |        |      |
| ATOM 2082 | CD2   | CD2 | . LEU LEU LEU A A 275 275 . | 111.745 | 98.658  | 31.114 | 1.00 |
| 7.99      | 1 . . |     |                             |         |         |        |      |
| ATOM 2083 | C     | C   | . LEU LEU LEU A A 275 275 . | 112.954 | 101.548 | 34.459 | 1.00 |
| 9.49      | 1 . . |     |                             |         |         |        |      |
| ATOM 2084 | O     | O   | . LEU LEU LEU A A 275 275 . | 112.178 | 102.513 | 34.356 | 1.00 |
| 8.84      | 1 . . |     |                             |         |         |        |      |
| ATOM 2085 | N     | N   | . GLY GLY GLY A A 276 276 . | 113.070 | 100.857 | 35.582 | 1.00 |
| 9.40      | 1 . . |     |                             |         |         |        |      |
| ATOM 2086 | CA    | CA  | . GLY GLY GLY A A 276 276 . | 112.214 | 101.216 | 36.721 | 1.00 |
| 7.31      | 1 . . |     |                             |         |         |        |      |
| ATOM 2087 | C     | C   | . GLY GLY GLY A A 276 276 . | 112.425 | 102.651 | 37.257 | 1.00 |
| 9.84      | 1 . . |     |                             |         |         |        |      |
| ATOM 2088 | O     | O   | . GLY GLY GLY A A 276 276 . | 111.444 | 103.385 | 37.605 | 1.00 |
| 9.42      | 1 . . |     |                             |         |         |        |      |
| ATOM 2089 | N     | N   | . ALA ALA ALA A A 277 277 . | 113.707 | 103.045 | 37.277 | 1.00 |
| 10.21     | 1 . . |     |                             |         |         |        |      |
| ATOM 2090 | CA    | CA  | . ALA ALA ALA A A 277 277 . | 114.097 | 104.393 | 37.690 | 1.00 |
| 10.25     | 1 . . |     |                             |         |         |        |      |
| ATOM 2091 | CB    | CB  | . ALA ALA ALA A A 277 277 . | 115.621 | 104.627 | 37.612 | 1.00 |
| 10.66     | 1 . . |     |                             |         |         |        |      |
| ATOM 2092 | C     | C   | . ALA ALA ALA A A 277 277 . | 113.419 | 105.359 | 36.751 | 1.00 |
| 10.98     | 1 . . |     |                             |         |         |        |      |
| ATOM 2093 | O     | O   | . ALA ALA ALA A A 277 277 . | 112.970 | 106.435 | 37.214 | 1.00 |
| 10.51     | 1 . . |     |                             |         |         |        |      |
| ATOM 2094 | N     | N   | . LEU LEU LEU A A 278 278 . | 113.375 | 105.009 | 35.453 | 1.00 |
| 8.88      | 1 . . |     |                             |         |         |        |      |

|           |       |     |                             |         |         |        |      |
|-----------|-------|-----|-----------------------------|---------|---------|--------|------|
| ATOM 2095 | CA    | CA  | . LEU LEU LEU A A 278 278 . | 112.685 | 105.924 | 34.492 | 1.00 |
| 8.98      | 1 . . |     |                             |         |         |        |      |
| ATOM 2096 | CB    | CB  | . LEU LEU LEU A A 278 278 . | 112.866 | 105.480 | 33.019 | 1.00 |
| 7.89      | 1 . . |     |                             |         |         |        |      |
| ATOM 2097 | CG    | CG  | . LEU LEU LEU A A 278 278 . | 112.456 | 106.360 | 31.851 | 1.00 |
| 9.34      | 1 . . |     |                             |         |         |        |      |
| ATOM 2098 | CD1   | CD1 | . LEU LEU LEU A A 278 278 . | 112.969 | 107.771 | 32.084 | 1.00 |
| 8.78      | 1 . . |     |                             |         |         |        |      |
| ATOM 2099 | CD2   | CD2 | . LEU LEU LEU A A 278 278 . | 113.062 | 105.784 | 30.603 | 1.00 |
| 9.65      | 1 . . |     |                             |         |         |        |      |
| ATOM 2100 | C     | C   | . LEU LEU LEU A A 278 278 . | 111.228 | 106.104 | 34.842 | 1.00 |
| 8.87      | 1 . . |     |                             |         |         |        |      |
| ATOM 2101 | O     | O   | . LEU LEU LEU A A 278 278 . | 110.706 | 107.262 | 34.784 | 1.00 |
| 8.55      | 1 . . |     |                             |         |         |        |      |
| ATOM 2102 | N     | N   | . TYR TYR TYR A A 279 279 . | 110.556 | 104.997 | 35.166 | 1.00 |
| 7.39      | 1 . . |     |                             |         |         |        |      |
| ATOM 2103 | CA    | CA  | . TYR TYR TYR A A 279 279 . | 109.179 | 105.081 | 35.568 | 1.00 |
| 6.90      | 1 . . |     |                             |         |         |        |      |
| ATOM 2104 | CB    | CB  | . TYR TYR TYR A A 279 279 . | 108.485 | 103.706 | 35.791 | 1.00 |
| 6.65      | 1 . . |     |                             |         |         |        |      |
| ATOM 2105 | CG    | CG  | . TYR TYR TYR A A 279 279 . | 108.577 | 102.777 | 34.646 | 1.00 |
| 6.45      | 1 . . |     |                             |         |         |        |      |
| ATOM 2106 | CD1   | CD1 | . TYR TYR TYR A A 279 279 . | 108.430 | 103.256 | 33.316 | 1.00 |
| 5.89      | 1 . . |     |                             |         |         |        |      |
| ATOM 2107 | CE1   | CE1 | . TYR TYR TYR A A 279 279 . | 108.522 | 102.340 | 32.225 | 1.00 |
| 8.09      | 1 . . |     |                             |         |         |        |      |
| ATOM 2108 | CZ    | CZ  | . TYR TYR TYR A A 279 279 . | 108.739 | 100.955 | 32.541 | 1.00 |
| 5.12      | 1 . . |     |                             |         |         |        |      |
| ATOM 2109 | OH    | OH  | . TYR TYR TYR A A 279 279 . | 108.812 | 100.072 | 31.502 | 1.00 |
| 8.31      | 1 . . |     |                             |         |         |        |      |
| ATOM 2110 | CE2   | CE2 | . TYR TYR TYR A A 279 279 . | 108.917 | 100.517 | 33.846 | 1.00 |
| 5.22      | 1 . . |     |                             |         |         |        |      |
| ATOM 2111 | CD2   | CD2 | . TYR TYR TYR A A 279 279 . | 108.806 | 101.414 | 34.896 | 1.00 |
| 7.14      | 1 . . |     |                             |         |         |        |      |
| ATOM 2112 | C     | C   | . TYR TYR TYR A A 279 279 . | 109.039 | 106.020 | 36.805 | 1.00 |
| 8.19      | 1 . . |     |                             |         |         |        |      |
| ATOM 2113 | O     | O   | . TYR TYR TYR A A 279 279 . | 108.188 | 106.931 | 36.763 | 1.00 |
| 8.91      | 1 . . |     |                             |         |         |        |      |
| ATOM 2114 | N     | N   | . GLN GLN GLN A A 280 280 . | 109.877 | 105.825 | 37.836 | 1.00 |
| 9.03      | 1 . . |     |                             |         |         |        |      |
| ATOM 2115 | CA    | CA  | . GLN GLN GLN A A 280 280 . | 109.866 | 106.715 | 38.998 | 1.00 |
| 9.58      | 1 . . |     |                             |         |         |        |      |
| ATOM 2116 | CB    | CB  | . GLN GLN GLN A A 280 280 . | 110.973 | 106.311 | 39.973 | 1.00 |
| 10.87     | 1 . . |     |                             |         |         |        |      |
| ATOM 2117 | CG    | CG  | . GLN GLN GLN A A 280 280 . | 110.740 | 104.950 | 40.646 | 1.00 |
| 13.65     | 1 . . |     |                             |         |         |        |      |
| ATOM 2118 | CD    | CD  | . GLN GLN GLN A A 280 280 . | 109.523 | 104.903 | 41.583 | 1.00 |
| 13.74     | 1 . . |     |                             |         |         |        |      |
| ATOM 2119 | OE1   | OE1 | . GLN GLN GLN A A 280 280 . | 108.829 | 105.909 | 41.790 | 1.00 |
| 12.90     | 1 . . |     |                             |         |         |        |      |
| ATOM 2120 | NE2   | NE2 | . GLN GLN GLN A A 280 280 . | 109.276 | 103.739 | 42.173 | 1.00 |
| 15.02     | 1 . . |     |                             |         |         |        |      |
| ATOM 2121 | C     | C   | . GLN GLN GLN A A 280 280 . | 109.905 | 108.209 | 38.572 | 1.00 |
| 9.93      | 1 . . |     |                             |         |         |        |      |

|           |         |     |                             |         |         |        |      |
|-----------|---------|-----|-----------------------------|---------|---------|--------|------|
| ATOM 2122 | O       | O   | . GLN GLN GLN A A 280 280 . | 109.066 | 109.011 | 39.005 | 1.00 |
| 7.63      | 1 . . . |     |                             |         |         |        |      |
| ATOM 2123 | N       | N   | . ASP ASP ASP A A 281 281 . | 110.826 | 108.559 | 37.682 | 1.00 |
| 10.42     | 1 . . . |     |                             |         |         |        |      |
| ATOM 2124 | CA      | CA  | . ASP ASP ASP A A 281 281 . | 110.892 | 109.903 | 37.107 | 1.00 |
| 10.48     | 1 . . . |     |                             |         |         |        |      |
| ATOM 2125 | CB      | CB  | . ASP ASP ASP A A 281 281 . | 112.094 | 110.063 | 36.155 | 1.00 |
| 11.28     | 1 . . . |     |                             |         |         |        |      |
| ATOM 2126 | CG      | CG  | . ASP ASP ASP A A 281 281 . | 113.435 | 110.045 | 36.876 | 1.00 |
| 14.53     | 1 . . . |     |                             |         |         |        |      |
| ATOM 2127 | OD1     | OD1 | . ASP ASP ASP A A 281 281 . | 113.466 | 109.838 | 38.086 | 1.00 |
| 21.14     | 1 . . . |     |                             |         |         |        |      |
| ATOM 2128 | OD2     | OD2 | . ASP ASP ASP A A 281 281 . | 114.485 | 110.244 | 36.210 | 1.00 |
| 19.93     | 1 . . . |     |                             |         |         |        |      |
| ATOM 2129 | C       | C   | . ASP ASP ASP A A 281 281 . | 109.550 | 110.302 | 36.458 | 1.00 |
| 10.52     | 1 . . . |     |                             |         |         |        |      |
| ATOM 2130 | O       | O   | . ASP ASP ASP A A 281 281 . | 109.004 | 111.359 | 36.764 | 1.00 |
| 8.98      | 1 . . . |     |                             |         |         |        |      |
| ATOM 2131 | N       | N   | . PHE PHE PHE A A 282 282 . | 108.939 | 109.412 | 35.667 | 1.00 |
| 9.48      | 1 . . . |     |                             |         |         |        |      |
| ATOM 2132 | CA      | CA  | . PHE PHE PHE A A 282 282 . | 107.670 | 109.771 | 35.051 | 1.00 |
| 8.95      | 1 . . . |     |                             |         |         |        |      |
| ATOM 2133 | CB      | CB  | . PHE PHE PHE A A 282 282 . | 107.224 | 108.664 | 34.109 | 1.00 |
| 9.27      | 1 . . . |     |                             |         |         |        |      |
| ATOM 2134 | CG      | CG  | . PHE PHE PHE A A 282 282 . | 108.146 | 108.430 | 32.934 | 1.00 |
| 7.84      | 1 . . . |     |                             |         |         |        |      |
| ATOM 2135 | CD1     | CD1 | . PHE PHE PHE A A 282 282 . | 107.943 | 107.328 | 32.093 | 1.00 |
| 9.41      | 1 . . . |     |                             |         |         |        |      |
| ATOM 2136 | CE1     | CE1 | . PHE PHE PHE A A 282 282 . | 108.754 | 107.123 | 30.974 | 1.00 |
| 10.81     | 1 . . . |     |                             |         |         |        |      |
| ATOM 2137 | CZ      | CZ  | . PHE PHE PHE A A 282 282 . | 109.758 | 108.004 | 30.660 | 1.00 |
| 11.13     | 1 . . . |     |                             |         |         |        |      |
| ATOM 2138 | CE2     | CE2 | . PHE PHE PHE A A 282 282 . | 109.985 | 109.106 | 31.506 | 1.00 |
| 11.85     | 1 . . . |     |                             |         |         |        |      |
| ATOM 2139 | CD2     | CD2 | . PHE PHE PHE A A 282 282 . | 109.163 | 109.306 | 32.611 | 1.00 |
| 9.01      | 1 . . . |     |                             |         |         |        |      |
| ATOM 2140 | C       | C   | . PHE PHE PHE A A 282 282 . | 106.552 | 110.038 | 36.069 | 1.00 |
| 9.00      | 1 . . . |     |                             |         |         |        |      |
| ATOM 2141 | O       | O   | . PHE PHE PHE A A 282 282 . | 105.715 | 110.941 | 35.884 | 1.00 |
| 10.71     | 1 . . . |     |                             |         |         |        |      |
| ATOM 2142 | N       | N   | . VAL VAL VAL A A 283 283 . | 106.506 | 109.231 | 37.117 | 1.00 |
| 8.41      | 1 . . . |     |                             |         |         |        |      |
| ATOM 2143 | CA      | CA  | . VAL VAL VAL A A 283 283 . | 105.531 | 109.355 | 38.182 | 1.00 |
| 9.75      | 1 . . . |     |                             |         |         |        |      |
| ATOM 2144 | CB      | CB  | . VAL VAL VAL A A 283 283 . | 105.605 | 108.108 | 39.079 | 1.00 |
| 10.51     | 1 . . . |     |                             |         |         |        |      |
| ATOM 2145 | CG1     | CG1 | . VAL VAL VAL A A 283 283 . | 104.702 | 108.211 | 40.256 | 1.00 |
| 10.91     | 1 . . . |     |                             |         |         |        |      |
| ATOM 2146 | CG2     | CG2 | . VAL VAL VAL A A 283 283 . | 105.230 | 106.871 | 38.208 | 1.00 |
| 11.20     | 1 . . . |     |                             |         |         |        |      |
| ATOM 2147 | C       | C   | . VAL VAL VAL A A 283 283 . | 105.716 | 110.639 | 38.987 | 1.00 |
| 10.77     | 1 . . . |     |                             |         |         |        |      |
| ATOM 2148 | O       | O   | . VAL VAL VAL A A 283 283 . | 104.747 | 111.234 | 39.431 | 1.00 |
| 10.00     | 1 . . . |     |                             |         |         |        |      |

|           |       |     |                             |         |         |        |      |
|-----------|-------|-----|-----------------------------|---------|---------|--------|------|
| ATOM 2149 | N     | N   | . ARG ARG ARG A A 284 284 . | 106.954 | 111.086 | 39.117 | 1.00 |
| 11.62     | 1 . . |     |                             |         |         |        |      |
| ATOM 2150 | CA    | CA  | . ARG ARG ARG A A 284 284 . | 107.154 | 112.295 | 39.894 | 1.00 |
| 13.28     | 1 . . |     |                             |         |         |        |      |
| ATOM 2151 | CB    | CB  | . ARG ARG ARG A A 284 284 . | 108.443 | 112.320 | 40.721 | 1.00 |
| 14.24     | 1 . . |     |                             |         |         |        |      |
| ATOM 2152 | CG    | CG  | . ARG ARG ARG A A 284 284 . | 109.697 | 112.350 | 39.983 | 1.00 |
| 17.26     | 1 . . |     |                             |         |         |        |      |
| ATOM 2153 | CD    | CD  | . ARG ARG ARG A A 284 284 . | 110.629 | 113.471 | 40.484 | 1.00 |
| 18.40     | 1 . . |     |                             |         |         |        |      |
| ATOM 2154 | NE    | NE  | . ARG ARG ARG A A 284 284 . | 111.443 | 113.811 | 39.337 | 1.00 |
| 17.91     | 1 . . |     |                             |         |         |        |      |
| ATOM 2155 | CZ    | CZ  | . ARG ARG ARG A A 284 284 . | 112.609 | 113.251 | 39.062 | 1.00 |
| 20.49     | 1 . . |     |                             |         |         |        |      |
| ATOM 2156 | NH1   | NH1 | . ARG ARG ARG A A 284 284 . | 113.152 | 112.366 | 39.908 | 1.00 |
| 23.69     | 1 . . |     |                             |         |         |        |      |
| ATOM 2157 | NH2   | NH2 | . ARG ARG ARG A A 284 284 . | 113.232 | 113.573 | 37.943 | 1.00 |
| 19.26     | 1 . . |     |                             |         |         |        |      |
| ATOM 2158 | C     | C   | . ARG ARG ARG A A 284 284 . | 106.988 | 113.498 | 39.028 | 1.00 |
| 12.27     | 1 . . |     |                             |         |         |        |      |
| ATOM 2159 | O     | O   | . ARG ARG ARG A A 284 284 . | 106.538 | 114.516 | 39.504 | 1.00 |
| 12.11     | 1 . . |     |                             |         |         |        |      |
| ATOM 2160 | N     | N   | . ASP ASP ASP A A 285 285 . | 107.270 | 113.372 | 37.729 | 1.00 |
| 10.92     | 1 . . |     |                             |         |         |        |      |
| ATOM 2161 | CA    | CA  | . ASP ASP ASP A A 285 285 . | 107.279 | 114.547 | 36.883 | 1.00 |
| 10.16     | 1 . . |     |                             |         |         |        |      |
| ATOM 2162 | CB    | CB  | . ASP ASP ASP A A 285 285 . | 108.451 | 114.472 | 35.906 | 1.00 |
| 9.92      | 1 . . |     |                             |         |         |        |      |
| ATOM 2163 | CG    | CG  | . ASP ASP ASP A A 285 285 . | 109.809 | 114.545 | 36.587 | 1.00 |
| 13.62     | 1 . . |     |                             |         |         |        |      |
| ATOM 2164 | OD1   | OD1 | . ASP ASP ASP A A 285 285 . | 109.866 | 114.985 | 37.755 | 1.00 |
| 14.64     | 1 . . |     |                             |         |         |        |      |
| ATOM 2165 | OD2   | OD2 | . ASP ASP ASP A A 285 285 . | 110.835 | 114.155 | 35.941 | 1.00 |
| 16.03     | 1 . . |     |                             |         |         |        |      |
| ATOM 2166 | C     | C   | . ASP ASP ASP A A 285 285 . | 105.986 | 114.769 | 36.111 | 1.00 |
| 9.27      | 1 . . |     |                             |         |         |        |      |
| ATOM 2167 | O     | O   | . ASP ASP ASP A A 285 285 . | 105.778 | 115.859 | 35.535 | 1.00 |
| 11.45     | 1 . . |     |                             |         |         |        |      |
| ATOM 2168 | N     | N   | . TYR TYR TYR A A 286 286 . | 105.125 | 113.752 | 36.053 | 1.00 |
| 8.39      | 1 . . |     |                             |         |         |        |      |
| ATOM 2169 | CA    | CA  | . TYR TYR TYR A A 286 286 . | 103.881 | 113.858 | 35.261 | 1.00 |
| 7.25      | 1 . . |     |                             |         |         |        |      |
| ATOM 2170 | CB    | CB  | . TYR TYR TYR A A 286 286 . | 104.006 | 113.154 | 33.916 | 1.00 |
| 6.81      | 1 . . |     |                             |         |         |        |      |
| ATOM 2171 | CG    | CG  | . TYR TYR TYR A A 286 286 . | 105.066 | 113.793 | 33.040 | 1.00 |
| 7.54      | 1 . . |     |                             |         |         |        |      |
| ATOM 2172 | CD1   | CD1 | . TYR TYR TYR A A 286 286 . | 104.768 | 114.904 | 32.307 | 1.00 |
| 13.57     | 1 . . |     |                             |         |         |        |      |
| ATOM 2173 | CE1   | CE1 | . TYR TYR TYR A A 286 286 . | 105.720 | 115.531 | 31.499 | 1.00 |
| 15.68     | 1 . . |     |                             |         |         |        |      |
| ATOM 2174 | CZ    | CZ  | . TYR TYR TYR A A 286 286 . | 106.995 | 115.017 | 31.414 | 1.00 |
| 16.71     | 1 . . |     |                             |         |         |        |      |
| ATOM 2175 | OH    | OH  | . TYR TYR TYR A A 286 286 . | 107.928 | 115.648 | 30.605 | 1.00 |
| 20.03     | 1 . . |     |                             |         |         |        |      |









|           |       |     |                   |         |                  |        |      |
|-----------|-------|-----|-------------------|---------|------------------|--------|------|
| ATOM 2257 | O     | O   | . ASP ASP ASP A A | 296 296 | . 107.681 90.546 | 32.148 | 1.00 |
| 8.27      | 1 . . |     |                   |         |                  |        |      |
| ATOM 2258 | N     | N   | . GLN GLN GLN A A | 297 297 | . 106.926 89.991 | 30.072 | 1.00 |
| 6.57      | 1 . . |     |                   |         |                  |        |      |
| ATOM 2259 | CA    | CA  | . GLN GLN GLN A A | 297 297 | . 105.927 89.033 | 30.542 | 1.00 |
| 7.40      | 1 . . |     |                   |         |                  |        |      |
| ATOM 2260 | CB    | CB  | . GLN GLN GLN A A | 297 297 | . 105.210 88.365 | 29.323 | 1.00 |
| 5.31      | 1 . . |     |                   |         |                  |        |      |
| ATOM 2261 | CG    | CG  | . GLN GLN GLN A A | 297 297 | . 106.129 87.589 | 28.448 | 1.00 |
| 4.50      | 1 . . |     |                   |         |                  |        |      |
| ATOM 2262 | CD    | CD  | . GLN GLN GLN A A | 297 297 | . 105.751 87.686 | 26.963 | 1.00 |
| 2.20      | 1 . . |     |                   |         |                  |        |      |
| ATOM 2263 | OE1   | OE1 | . GLN GLN GLN A A | 297 297 | . 104.570 87.720 | 26.580 | 1.00 |
| 7.47      | 1 . . |     |                   |         |                  |        |      |
| ATOM 2264 | NE2   | NE2 | . GLN GLN GLN A A | 297 297 | . 106.774 87.812 | 26.122 | 1.00 |
| 6.09      | 1 . . |     |                   |         |                  |        |      |
| ATOM 2265 | C     | C   | . GLN GLN GLN A A | 297 297 | . 106.451 87.937 | 31.472 | 1.00 |
| 7.15      | 1 . . |     |                   |         |                  |        |      |
| ATOM 2266 | O     | O   | . GLN GLN GLN A A | 297 297 | . 105.639 87.323 | 32.209 | 1.00 |
| 10.65     | 1 . . |     |                   |         |                  |        |      |
| ATOM 2267 | N     | N   | . ASP ASP ASP A A | 298 298 | . 107.751 87.654 | 31.404 | 1.00 |
| 10.06     | 1 . . |     |                   |         |                  |        |      |
| ATOM 2268 | CA    | CA  | . ASP ASP ASP A A | 298 298 | . 108.366 86.617 | 32.284 | 1.00 |
| 11.23     | 1 . . |     |                   |         |                  |        |      |
| ATOM 2269 | CB    | CB  | . ASP ASP ASP A A | 298 298 | . 109.191 85.558 | 31.472 | 1.00 |
| 13.23     | 1 . . |     |                   |         |                  |        |      |
| ATOM 2270 | CG    | CG  | . ASP ASP ASP A A | 298 298 | . 108.348 84.624 | 30.642 | 1.00 |
| 14.77     | 1 . . |     |                   |         |                  |        |      |
| ATOM 2271 | OD1   | OD1 | . ASP ASP ASP A A | 298 298 | . 107.377 84.011 | 31.115 | 1.00 |
| 17.63     | 1 . . |     |                   |         |                  |        |      |
| ATOM 2272 | OD2   | OD2 | . ASP ASP ASP A A | 298 298 | . 108.712 84.509 | 29.462 | 1.00 |
| 21.67     | 1 . . |     |                   |         |                  |        |      |
| ATOM 2273 | C     | C   | . ASP ASP ASP A A | 298 298 | . 109.308 87.248 | 33.315 | 1.00 |
| 11.89     | 1 . . |     |                   |         |                  |        |      |
| ATOM 2274 | O     | O   | . ASP ASP ASP A A | 298 298 | . 110.015 86.497 | 34.022 | 1.00 |
| 9.29      | 1 . . |     |                   |         |                  |        |      |
| ATOM 2275 | N     | N   | . ASP ASP ASP A A | 299 299 | . 109.336 88.587 | 33.400 | 1.00 |
| 11.35     | 1 . . |     |                   |         |                  |        |      |
| ATOM 2276 | CA    | CA  | . ASP ASP ASP A A | 299 299 | . 110.334 89.264 | 34.253 | 1.00 |
| 12.40     | 1 . . |     |                   |         |                  |        |      |
| ATOM 2277 | CB    | CB  | . ASP ASP ASP A A | 299 299 | . 110.935 90.537 | 33.585 | 1.00 |
| 11.70     | 1 . . |     |                   |         |                  |        |      |
| ATOM 2278 | CG    | CG  | . ASP ASP ASP A A | 299 299 | . 112.115 91.157 | 34.387 | 1.00 |
| 13.59     | 1 . . |     |                   |         |                  |        |      |
| ATOM 2279 | OD1   | OD1 | . ASP ASP ASP A A | 299 299 | . 112.539 90.577 | 35.434 | 1.00 |
| 15.78     | 1 . . |     |                   |         |                  |        |      |
| ATOM 2280 | OD2   | OD2 | . ASP ASP ASP A A | 299 299 | . 112.649 92.233 | 33.906 | 1.00 |
| 10.22     | 1 . . |     |                   |         |                  |        |      |
| ATOM 2281 | C     | C   | . ASP ASP ASP A A | 299 299 | . 109.661 89.525 | 35.619 | 1.00 |
| 12.23     | 1 . . |     |                   |         |                  |        |      |
| ATOM 2282 | O     | O   | . ASP ASP ASP A A | 299 299 | . 109.549 90.679 | 36.077 | 1.00 |
| 12.89     | 1 . . |     |                   |         |                  |        |      |
| ATOM 2283 | N     | N   | . TRP TRP TRP A A | 300 300 | . 109.251 88.449 | 36.293 | 1.00 |
| 12.77     | 1 . . |     |                   |         |                  |        |      |



|           |       |     |               |             |                  |        |      |
|-----------|-------|-----|---------------|-------------|------------------|--------|------|
| ATOM 2311 | CD1   | CD1 | . TRP TRP TRP | A A 303 303 | . 106.776 91.938 | 35.427 | 1.00 |
| 10.25     | 1 . . |     |               |             |                  |        |      |
| ATOM 2312 | NE1   | NE1 | . TRP TRP TRP | A A 303 303 | . 106.129 92.113 | 34.221 | 1.00 |
| 9.48      | 1 . . |     |               |             |                  |        |      |
| ATOM 2313 | CE2   | CE2 | . TRP TRP TRP | A A 303 303 | . 104.987 92.827 | 34.434 | 1.00 |
| 6.18      | 1 . . |     |               |             |                  |        |      |
| ATOM 2314 | CD2   | CD2 | . TRP TRP TRP | A A 303 303 | . 104.926 93.118 | 35.817 | 1.00 |
| 8.91      | 1 . . |     |               |             |                  |        |      |
| ATOM 2315 | CE3   | CE3 | . TRP TRP TRP | A A 303 303 | . 103.798 93.785 | 36.334 | 1.00 |
| 7.63      | 1 . . |     |               |             |                  |        |      |
| ATOM 2316 | CZ3   | CZ3 | . TRP TRP TRP | A A 303 303 | . 102.815 94.196 | 35.421 | 1.00 |
| 9.23      | 1 . . |     |               |             |                  |        |      |
| ATOM 2317 | CH2   | CH2 | . TRP TRP TRP | A A 303 303 | . 102.914 93.885 | 34.044 | 1.00 |
| 4.77      | 1 . . |     |               |             |                  |        |      |
| ATOM 2318 | CZ2   | CZ2 | . TRP TRP TRP | A A 303 303 | . 104.006 93.235 | 33.534 | 1.00 |
| 6.20      | 1 . . |     |               |             |                  |        |      |
| ATOM 2319 | C     | C   | . TRP TRP TRP | A A 303 303 | . 107.124 93.740 | 39.836 | 1.00 |
| 11.91     | 1 . . |     |               |             |                  |        |      |
| ATOM 2320 | O     | O   | . TRP TRP TRP | A A 303 303 | . 106.640 94.770 | 40.317 | 1.00 |
| 11.42     | 1 . . |     |               |             |                  |        |      |
| ATOM 2321 | N     | N   | . SER SER SER | A A 304 304 | . 107.454 92.683 | 40.588 | 1.00 |
| 12.51     | 1 . . |     |               |             |                  |        |      |
| ATOM 2322 | CA    | CA  | . SER SER SER | A A 304 304 | . 107.184 92.655 | 42.021 | 1.00 |
| 13.25     | 1 . . |     |               |             |                  |        |      |
| ATOM 2323 | CB    | CB  | . SER SER SER | A A 304 304 | . 107.569 91.283 | 42.606 | 1.00 |
| 14.72     | 1 . . |     |               |             |                  |        |      |
| ATOM 2324 | OG    | OG  | . SER SER SER | A A 304 304 | . 106.706 90.290 | 42.116 | 1.00 |
| 16.10     | 1 . . |     |               |             |                  |        |      |
| ATOM 2325 | C     | C   | . SER SER SER | A A 304 304 | . 107.956 93.762 | 42.769 | 1.00 |
| 13.81     | 1 . . |     |               |             |                  |        |      |
| ATOM 2326 | O     | O   | . SER SER SER | A A 304 304 | . 107.377 94.447 | 43.593 | 1.00 |
| 15.04     | 1 . . |     |               |             |                  |        |      |
| ATOM 2327 | N     | N   | . LYS LYS LYS | A A 305 305 | . 109.225 93.953 | 42.433 | 1.00 |
| 14.69     | 1 . . |     |               |             |                  |        |      |
| ATOM 2328 | CA    | CA  | . LYS LYS LYS | A A 305 305 | . 110.041 95.038 | 42.992 | 1.00 |
| 15.49     | 1 . . |     |               |             |                  |        |      |
| ATOM 2329 | CB    | CB  | . LYS LYS LYS | A A 305 305 | . 111.442 95.057 | 42.370 | 1.00 |
| 14.97     | 1 . . |     |               |             |                  |        |      |
| ATOM 2330 | CG    | CG  | . LYS LYS LYS | A A 305 305 | . 112.457 96.124 | 42.896 | 1.00 |
| 16.09     | 1 . . |     |               |             |                  |        |      |
| ATOM 2331 | CD    | CD  | . LYS LYS LYS | A A 305 305 | . 113.835 95.862 | 42.288 | 1.00 |
| 18.99     | 1 . . |     |               |             |                  |        |      |
| ATOM 2332 | CE    | CE  | . LYS LYS LYS | A A 305 305 | . 114.947 96.560 | 43.052 | 1.00 |
| 21.64     | 1 . . |     |               |             |                  |        |      |
| ATOM 2333 | NZ    | NZ  | . LYS LYS LYS | A A 305 305 | . 116.253 96.210 | 42.421 | 1.00 |
| 20.80     | 1 . . |     |               |             |                  |        |      |
| ATOM 2334 | C     | C   | . LYS LYS LYS | A A 305 305 | . 109.368 96.386 | 42.738 | 1.00 |
| 15.39     | 1 . . |     |               |             |                  |        |      |
| ATOM 2335 | O     | O   | . LYS LYS LYS | A A 305 305 | . 109.073 97.138 | 43.684 | 1.00 |
| 17.30     | 1 . . |     |               |             |                  |        |      |
| ATOM 2336 | N     | N   | . PHE PHE PHE | A A 306 306 | . 109.139 96.678 | 41.460 | 1.00 |
| 14.05     | 1 . . |     |               |             |                  |        |      |
| ATOM 2337 | CA    | CA  | . PHE PHE PHE | A A 306 306 | . 108.545 97.928 | 41.052 | 1.00 |
| 12.77     | 1 . . |     |               |             |                  |        |      |



|           |     |       |                             |         |         |        |      |
|-----------|-----|-------|-----------------------------|---------|---------|--------|------|
| ATOM 2365 | C   | C     | . ASN ASN ASN A A 309 309 . | 107.048 | 101.878 | 44.792 | 1.00 |
| 14.24     | 1   | . . . |                             |         |         |        |      |
| ATOM 2366 | O   | O     | . ASN ASN ASN A A 309 309 . | 107.603 | 102.986 | 44.608 | 1.00 |
| 17.09     | 1   | . . . |                             |         |         |        |      |
| ATOM 2367 | N   | N     | . VAL VAL VAL A A 310 310 . | 105.813 | 101.632 | 44.418 | 1.00 |
| 13.13     | 1   | . . . |                             |         |         |        |      |
| ATOM 2368 | CA  | CA    | . VAL VAL VAL A A 310 310 . | 104.998 | 102.757 | 43.903 | 1.00 |
| 11.51     | 1   | . . . |                             |         |         |        |      |
| ATOM 2369 | CB  | CB    | . VAL VAL VAL A A 310 310 . | 104.762 | 102.691 | 42.374 | 1.00 |
| 11.55     | 1   | . . . |                             |         |         |        |      |
| ATOM 2370 | CG1 | CG1   | . VAL VAL VAL A A 310 310 . | 106.066 | 102.819 | 41.579 | 1.00 |
| 13.62     | 1   | . . . |                             |         |         |        |      |
| ATOM 2371 | CG2 | CG2   | . VAL VAL VAL A A 310 310 . | 103.959 | 101.444 | 41.977 | 1.00 |
| 9.57      | 1   | . . . |                             |         |         |        |      |
| ATOM 2372 | C   | C     | . VAL VAL VAL A A 310 310 . | 103.632 | 102.690 | 44.508 | 1.00 |
| 11.60     | 1   | . . . |                             |         |         |        |      |
| ATOM 2373 | O   | O     | . VAL VAL VAL A A 310 310 . | 103.181 | 101.612 | 44.970 | 1.00 |
| 14.17     | 1   | . . . |                             |         |         |        |      |
| ATOM 2374 | N   | N     | . GLY GLY GLY A A 311 311 . | 102.937 | 103.827 | 44.457 | 1.00 |
| 11.68     | 1   | . . . |                             |         |         |        |      |
| ATOM 2375 | CA  | CA    | . GLY GLY GLY A A 311 311 . | 101.567 | 103.905 | 44.936 | 1.00 |
| 10.58     | 1   | . . . |                             |         |         |        |      |
| ATOM 2376 | C   | C     | . GLY GLY GLY A A 311 311 . | 100.537 | 103.927 | 43.829 | 1.00 |
| 9.55      | 1   | . . . |                             |         |         |        |      |
| ATOM 2377 | O   | O     | . GLY GLY GLY A A 311 311 . | 99.345  | 104.089 | 44.114 | 1.00 |
| 10.58     | 1   | . . . |                             |         |         |        |      |
| ATOM 2378 | N   | N     | . ILE ILE ILE A A 312 312 . | 100.973 | 103.796 | 42.591 | 1.00 |
| 7.88      | 1   | . . . |                             |         |         |        |      |
| ATOM 2379 | CA  | CA    | . ILE ILE ILE A A 312 312 . | 100.010 | 103.855 | 41.471 | 1.00 |
| 7.02      | 1   | . . . |                             |         |         |        |      |
| ATOM 2380 | CB  | CB    | . ILE ILE ILE A A 312 312 . | 100.639 | 104.586 | 40.291 | 1.00 |
| 7.86      | 1   | . . . |                             |         |         |        |      |
| ATOM 2381 | CG1 | CG1   | . ILE ILE ILE A A 312 312 . | 101.923 | 103.898 | 39.847 | 1.00 |
| 8.09      | 1   | . . . |                             |         |         |        |      |
| ATOM 2382 | CD1 | CD1   | . ILE ILE ILE A A 312 312 . | 102.132 | 104.067 | 38.339 | 1.00 |
| 10.12     | 1   | . . . |                             |         |         |        |      |
| ATOM 2383 | CG2 | CG2   | . ILE ILE ILE A A 312 312 . | 101.009 | 106.040 | 40.730 | 1.00 |
| 6.53      | 1   | . . . |                             |         |         |        |      |
| ATOM 2384 | C   | C     | . ILE ILE ILE A A 312 312 . | 99.431  | 102.512 | 41.034 | 1.00 |
| 6.62      | 1   | . . . |                             |         |         |        |      |
| ATOM 2385 | O   | O     | . ILE ILE ILE A A 312 312 . | 99.827  | 101.512 | 41.598 | 1.00 |
| 6.57      | 1   | . . . |                             |         |         |        |      |
| ATOM 2386 | N   | N     | . GLN GLN GLN A A 313 313 . | 98.572  | 102.535 | 39.997 | 1.00 |
| 5.00      | 1   | . . . |                             |         |         |        |      |
| ATOM 2387 | CA  | CA    | . GLN GLN GLN A A 313 313 . | 98.007  | 101.342 | 39.360 | 1.00 |
| 5.13      | 1   | . . . |                             |         |         |        |      |
| ATOM 2388 | CB  | CB    | . GLN GLN GLN A A 313 313 . | 96.785  | 101.746 | 38.539 | 1.00 |
| 4.17      | 1   | . . . |                             |         |         |        |      |
| ATOM 2389 | CG  | CG    | . GLN GLN GLN A A 313 313 . | 96.267  | 100.547 | 37.794 | 1.00 |
| 3.84      | 1   | . . . |                             |         |         |        |      |
| ATOM 2390 | CD  | CD    | . GLN GLN GLN A A 313 313 . | 94.881  | 100.663 | 37.392 | 1.00 |
| 2.83      | 1   | . . . |                             |         |         |        |      |
| ATOM 2391 | OE1 | OE1   | . GLN GLN GLN A A 313 313 . | 93.977  | 100.215 | 38.103 | 1.00 |
| 4.84      | 1   | . . . |                             |         |         |        |      |









|               |     |                             |         |        |        |      |
|---------------|-----|-----------------------------|---------|--------|--------|------|
| ATOM 2473 O   | O   | . PRO PRO PRO A A 324 324 . | 94.847  | 82.419 | 37.592 | 1.00 |
| 11.00 1 . .   |     |                             |         |        |        |      |
| ATOM 2474 N   | N   | . LYS LYS LYS A A 325 325 . | 95.284  | 81.144 | 35.749 | 1.00 |
| 11.11 1 . .   |     |                             |         |        |        |      |
| ATOM 2475 CA  | CA  | . LYS LYS LYS A A 325 325 . | 96.547  | 80.508 | 36.204 | 1.00 |
| 12.16 1 . .   |     |                             |         |        |        |      |
| ATOM 2476 CB  | CB  | . LYS LYS LYS A A 325 325 . | 97.013  | 79.435 | 35.183 | 1.00 |
| 13.67 1 . .   |     |                             |         |        |        |      |
| ATOM 2477 CG  | CG  | . LYS LYS LYS A A 325 325 . | 98.454  | 78.899 | 35.362 | 1.00 |
| 17.85 1 . .   |     |                             |         |        |        |      |
| ATOM 2478 CD  | CD  | . LYS LYS LYS A A 325 325 . | 99.573  | 79.679 | 34.587 | 1.00 |
| 23.76 1 . .   |     |                             |         |        |        |      |
| ATOM 2479 CE  | CE  | . LYS LYS LYS A A 325 325 . | 100.967 | 79.500 | 35.202 | 1.00 |
| 25.19 1 . .   |     |                             |         |        |        |      |
| ATOM 2480 NZ  | NZ  | . LYS LYS LYS A A 325 325 . | 101.515 | 80.680 | 35.993 | 1.00 |
| 26.77 1 . .   |     |                             |         |        |        |      |
| ATOM 2481 C   | C   | . LYS LYS LYS A A 325 325 . | 97.668  | 81.556 | 36.395 | 1.00 |
| 10.22 1 . .   |     |                             |         |        |        |      |
| ATOM 2482 O   | O   | . LYS LYS LYS A A 325 325 . | 98.381  | 81.584 | 37.386 | 1.00 |
| 10.43 1 . .   |     |                             |         |        |        |      |
| ATOM 2483 N   | N   | . ARG ARG ARG A A 326 326 . | 97.793  | 82.454 | 35.418 | 1.00 |
| 8.30 1 . .    |     |                             |         |        |        |      |
| ATOM 2484 CA  | CA  | . ARG ARG ARG A A 326 326 . | 98.836  | 83.500 | 35.480 | 1.00 |
| 6.39 1 . .    |     |                             |         |        |        |      |
| ATOM 2485 CB  | CB  | . ARG ARG ARG A A 326 326 . | 99.030  | 84.186 | 34.078 | 1.00 |
| 7.99 1 . .    |     |                             |         |        |        |      |
| ATOM 2486 CG  | CG  | . ARG ARG ARG A A 326 326 . | 99.692  | 83.333 | 32.881 | 1.00 |
| 11.06 1 . .   |     |                             |         |        |        |      |
| ATOM 2487 CD  | CD  | . ARG ARG ARG A A 326 326 . | 100.810 | 84.185 | 32.141 | 1.00 |
| 16.34 1 . .   |     |                             |         |        |        |      |
| ATOM 2488 NE  | NE  | . ARG ARG ARG A A 326 326 . | 102.093 | 83.710 | 32.594 | 1.00 |
| 21.14 1 . .   |     |                             |         |        |        |      |
| ATOM 2489 CZ  | CZ  | . ARG ARG ARG A A 326 326 . | 103.259 | 84.324 | 32.571 | 1.00 |
| 22.47 1 . .   |     |                             |         |        |        |      |
| ATOM 2490 NH1 | NH1 | . ARG ARG ARG A A 326 326 . | 103.414 | 85.542 | 32.106 | 1.00 |
| 22.99 1 . .   |     |                             |         |        |        |      |
| ATOM 2491 NH2 | NH2 | . ARG ARG ARG A A 326 326 . | 104.304 | 83.661 | 33.036 | 1.00 |
| 26.22 1 . .   |     |                             |         |        |        |      |
| ATOM 2492 C   | C   | . ARG ARG ARG A A 326 326 . | 98.412  | 84.604 | 36.516 | 1.00 |
| 7.26 1 . .    |     |                             |         |        |        |      |
| ATOM 2493 O   | O   | . ARG ARG ARG A A 326 326 . | 99.234  | 85.142 | 37.225 | 1.00 |
| 6.70 1 . .    |     |                             |         |        |        |      |
| ATOM 2494 N   | N   | . ILE ILE ILE A A 327 327 . | 97.110  | 84.884 | 36.605 | 1.00 |
| 4.79 1 . .    |     |                             |         |        |        |      |
| ATOM 2495 CA  | CA  | . ILE ILE ILE A A 327 327 . | 96.610  | 85.911 | 37.529 | 1.00 |
| 7.05 1 . .    |     |                             |         |        |        |      |
| ATOM 2496 CB  | CB  | . ILE ILE ILE A A 327 327 . | 95.118  | 86.066 | 37.315 | 1.00 |
| 6.17 1 . .    |     |                             |         |        |        |      |
| ATOM 2497 CG1 | CG1 | . ILE ILE ILE A A 327 327 . | 94.901  | 86.687 | 35.931 | 1.00 |
| 3.28 1 . .    |     |                             |         |        |        |      |
| ATOM 2498 CD1 | CD1 | . ILE ILE ILE A A 327 327 . | 93.284  | 86.642 | 35.551 | 1.00 |
| 6.34 1 . .    |     |                             |         |        |        |      |
| ATOM 2499 CG2 | CG2 | . ILE ILE ILE A A 327 327 . | 94.375  | 86.896 | 38.379 | 1.00 |
| 6.76 1 . .    |     |                             |         |        |        |      |

|           |         |     |                                                        |
|-----------|---------|-----|--------------------------------------------------------|
| ATOM 2500 | C       | C   | . ILE ILE ILE A A 327 327 . 96.912 85.428 38.945 1.00  |
| 6.59      | 1 . . . |     |                                                        |
| ATOM 2501 | O       | O   | . ILE ILE ILE A A 327 327 . 97.478 86.194 39.768 1.00  |
| 8.53      | 1 . . . |     |                                                        |
| ATOM 2502 | N       | N   | . GLU GLU GLU A A 328 328 . 96.471 84.206 39.260 1.00  |
| 9.31      | 1 . . . |     |                                                        |
| ATOM 2503 | CA      | CA  | . GLU GLU GLU A A 328 328 . 96.873 83.620 40.556 1.00  |
| 9.99      | 1 . . . |     |                                                        |
| ATOM 2504 | CB      | CB  | . GLU GLU GLU A A 328 328 . 96.493 82.137 40.727 1.00  |
| 9.67      | 1 . . . |     |                                                        |
| ATOM 2505 | CG      | CG  | . GLU GLU GLU A A 328 328 . 95.048 81.785 40.650 1.00  |
| 14.18     | 1 . . . |     |                                                        |
| ATOM 2506 | CD      | CD  | . GLU GLU GLU A A 328 328 . 94.230 82.012 41.916 1.00  |
| 20.08     | 1 . . . |     |                                                        |
| ATOM 2507 | OE1     | OE1 | . GLU GLU GLU A A 328 328 . 93.161 81.342 42.017 1.00  |
| 24.39     | 1 . . . |     |                                                        |
| ATOM 2508 | OE2     | OE2 | . GLU GLU GLU A A 328 328 . 94.622 82.831 42.791 1.00  |
| 22.41     | 1 . . . |     |                                                        |
| ATOM 2509 | C       | C   | . GLU GLU GLU A A 328 328 . 98.357 83.778 40.874 1.00  |
| 8.89      | 1 . . . |     |                                                        |
| ATOM 2510 | O       | O   | . GLU GLU GLU A A 328 328 . 98.669 84.121 42.010 1.00  |
| 9.36      | 1 . . . |     |                                                        |
| ATOM 2511 | N       | N   | . ARG ARG ARG A A 329 329 . 99.276 83.543 39.922 1.00  |
| 9.17      | 1 . . . |     |                                                        |
| ATOM 2512 | CA      | CA  | . ARG ARG ARG A A 329 329 . 100.696 83.672 40.239 1.00 |
| 11.16     | 1 . . . |     |                                                        |
| ATOM 2513 | CB      | CB  | . ARG ARG ARG A A 329 329 . 101.544 83.092 39.136 1.00 |
| 11.00     | 1 . . . |     |                                                        |
| ATOM 2514 | CG      | CG  | . ARG ARG ARG A A 329 329 . 103.069 83.115 39.358 1.00 |
| 13.38     | 1 . . . |     |                                                        |
| ATOM 2515 | CD      | CD  | . ARG ARG ARG A A 329 329 . 103.777 82.631 38.092 1.00 |
| 14.51     | 1 . . . |     |                                                        |
| ATOM 2516 | NE      | NE  | . ARG ARG ARG A A 329 329 . 105.231 82.740 38.169 1.00 |
| 19.22     | 1 . . . |     |                                                        |
| ATOM 2517 | CZ      | CZ  | . ARG ARG ARG A A 329 329 . 106.059 82.295 37.231 1.00 |
| 18.76     | 1 . . . |     |                                                        |
| ATOM 2518 | NH1     | NH1 | . ARG ARG ARG A A 329 329 . 105.581 81.738 36.135 1.00 |
| 20.92     | 1 . . . |     |                                                        |
| ATOM 2519 | NH2     | NH2 | . ARG ARG ARG A A 329 329 . 107.359 82.407 37.382 1.00 |
| 22.14     | 1 . . . |     |                                                        |
| ATOM 2520 | C       | C   | . ARG ARG ARG A A 329 329 . 100.981 85.161 40.502 1.00 |
| 12.41     | 1 . . . |     |                                                        |
| ATOM 2521 | O       | O   | . ARG ARG ARG A A 329 329 . 101.715 85.520 41.469 1.00 |
| 14.09     | 1 . . . |     |                                                        |
| ATOM 2522 | N       | N   | . ALA ALA ALA A A 330 330 . 100.327 86.035 39.717 1.00 |
| 11.07     | 1 . . . |     |                                                        |
| ATOM 2523 | CA      | CA  | . ALA ALA ALA A A 330 330 . 100.544 87.450 39.866 1.00 |
| 11.25     | 1 . . . |     |                                                        |
| ATOM 2524 | CB      | CB  | . ALA ALA ALA A A 330 330 . 99.858 88.262 38.686 1.00  |
| 9.66      | 1 . . . |     |                                                        |
| ATOM 2525 | C       | C   | . ALA ALA ALA A A 330 330 . 100.100 87.970 41.224 1.00 |
| 11.59     | 1 . . . |     |                                                        |
| ATOM 2526 | O       | O   | . ALA ALA ALA A A 330 330 . 100.738 88.858 41.799 1.00 |
| 10.66     | 1 . . . |     |                                                        |

|           |       |     |                                                        |
|-----------|-------|-----|--------------------------------------------------------|
| ATOM 2527 | N     | N   | . VAL VAL VAL A A 331 331 . 98.977 87.451 41.688 1.00  |
| 12.89     | 1 . . |     |                                                        |
| ATOM 2528 | CA    | CA  | . VAL VAL VAL A A 331 331 . 98.448 87.782 43.019 1.00  |
| 13.92     | 1 . . |     |                                                        |
| ATOM 2529 | CB    | CB  | . VAL VAL VAL A A 331 331 . 97.056 87.101 43.325 1.00  |
| 13.97     | 1 . . |     |                                                        |
| ATOM 2530 | CG1   | CG1 | . VAL VAL VAL A A 331 331 . 96.722 87.218 44.838 1.00  |
| 14.94     | 1 . . |     |                                                        |
| ATOM 2531 | CG2   | CG2 | . VAL VAL VAL A A 331 331 . 95.907 87.708 42.513 1.00  |
| 10.68     | 1 . . |     |                                                        |
| ATOM 2532 | C     | C   | . VAL VAL VAL A A 331 331 . 99.415 87.366 44.121 1.00  |
| 16.39     | 1 . . |     |                                                        |
| ATOM 2533 | O     | O   | . VAL VAL VAL A A 331 331 . 99.687 88.159 45.006 1.00  |
| 16.32     | 1 . . |     |                                                        |
| ATOM 2534 | N     | N   | . GLU GLU GLU A A 332 332 . 99.928 86.139 44.045 1.00  |
| 17.75     | 1 . . |     |                                                        |
| ATOM 2535 | CA    | CA  | . GLU GLU GLU A A 332 332 . 100.755 85.565 45.134 1.00 |
| 19.65     | 1 . . |     |                                                        |
| ATOM 2536 | CB    | CB  | . GLU GLU GLU A A 332 332 . 101.003 84.047 44.944 1.00 |
| 20.51     | 1 . . |     |                                                        |
| ATOM 2537 | CG    | CG  | . GLU GLU GLU A A 332 332 . 101.944 83.341 45.975 1.00 |
| 24.60     | 1 . . |     |                                                        |
| ATOM 2538 | CD    | CD  | . GLU GLU GLU A A 332 332 . 101.415 83.307 47.436 1.00 |
| 29.50     | 1 . . |     |                                                        |
| ATOM 2539 | OE1   | OE1 | . GLU GLU GLU A A 332 332 . 102.263 83.183 48.362 1.00 |
| 32.56     | 1 . . |     |                                                        |
| ATOM 2540 | OE2   | OE2 | . GLU GLU GLU A A 332 332 . 100.174 83.374 47.670 1.00 |
| 28.92     | 1 . . |     |                                                        |
| ATOM 2541 | C     | C   | . GLU GLU GLU A A 332 332 . 102.058 86.321 45.203 1.00 |
| 19.38     | 1 . . |     |                                                        |
| ATOM 2542 | O     | O   | . GLU GLU GLU A A 332 332 . 102.606 86.548 46.297 1.00 |
| 19.52     | 1 . . |     |                                                        |
| ATOM 2543 | N     | N   | . GLU GLU GLU A A 333 333 . 102.570 86.670 44.028 1.00 |
| 17.57     | 1 . . |     |                                                        |
| ATOM 2544 | CA    | CA  | . GLU GLU GLU A A 333 333 . 103.832 87.362 43.923 1.00 |
| 15.79     | 1 . . |     |                                                        |
| ATOM 2545 | CB    | CB  | . GLU GLU GLU A A 333 333 . 104.558 86.888 42.675 1.00 |
| 17.34     | 1 . . |     |                                                        |
| ATOM 2546 | CG    | CG  | . GLU GLU GLU A A 333 333 . 104.803 85.371 42.740 1.00 |
| 19.48     | 1 . . |     |                                                        |
| ATOM 2547 | CD    | CD  | . GLU GLU GLU A A 333 333 . 105.773 84.855 41.703 1.00 |
| 24.46     | 1 . . |     |                                                        |
| ATOM 2548 | OE1   | OE1 | . GLU GLU GLU A A 333 333 . 105.379 84.003 40.870 1.00 |
| 26.15     | 1 . . |     |                                                        |
| ATOM 2549 | OE2   | OE2 | . GLU GLU GLU A A 333 333 . 106.935 85.281 41.745 1.00 |
| 29.30     | 1 . . |     |                                                        |
| ATOM 2550 | C     | C   | . GLU GLU GLU A A 333 333 . 103.702 88.908 43.982 1.00 |
| 14.26     | 1 . . |     |                                                        |
| ATOM 2551 | O     | O   | . GLU GLU GLU A A 333 333 . 104.679 89.628 43.800 1.00 |
| 12.11     | 1 . . |     |                                                        |
| ATOM 2552 | N     | N   | . LYS LYS LYS A A 334 334 . 102.496 89.396 44.251 1.00 |
| 11.75     | 1 . . |     |                                                        |
| ATOM 2553 | CA    | CA  | . LYS LYS LYS A A 334 334 . 102.246 90.829 44.319 1.00 |
| 13.16     | 1 . . |     |                                                        |

|           |       |     |                             |         |        |        |      |
|-----------|-------|-----|-----------------------------|---------|--------|--------|------|
| ATOM 2554 | CB    | CB  | . LYS LYS LYS A A 334 334 . | 102.907 | 91.422 | 45.567 | 1.00 |
| 12.81     | 1 . . |     |                             |         |        |        |      |
| ATOM 2555 | CG    | CG  | . LYS LYS LYS A A 334 334 . | 102.229 | 91.086 | 46.874 | 1.00 |
| 17.99     | 1 . . |     |                             |         |        |        |      |
| ATOM 2556 | CD    | CD  | . LYS LYS LYS A A 334 334 . | 100.767 | 91.119 | 46.650 | 1.00 |
| 22.01     | 1 . . |     |                             |         |        |        |      |
| ATOM 2557 | CE    | CE  | . LYS LYS LYS A A 334 334 . | 100.000 | 91.805 | 47.727 | 1.00 |
| 27.11     | 1 . . |     |                             |         |        |        |      |
| ATOM 2558 | NZ    | NZ  | . LYS LYS LYS A A 334 334 . | 98.575  | 91.834 | 47.331 | 1.00 |
| 26.27     | 1 . . |     |                             |         |        |        |      |
| ATOM 2559 | C     | C   | . LYS LYS LYS A A 334 334 . | 102.822 | 91.523 | 43.086 | 1.00 |
| 12.11     | 1 . . |     |                             |         |        |        |      |
| ATOM 2560 | O     | O   | . LYS LYS LYS A A 334 334 . | 103.543 | 92.537 | 43.199 | 1.00 |
| 13.42     | 1 . . |     |                             |         |        |        |      |
| ATOM 2561 | N     | N   | . ALA ALA ALA A A 335 335 . | 102.583 | 90.952 | 41.908 | 1.00 |
| 10.46     | 1 . . |     |                             |         |        |        |      |
| ATOM 2562 | CA    | CA  | . ALA ALA ALA A A 335 335 . | 103.310 | 91.462 | 40.748 | 1.00 |
| 9.84      | 1 . . |     |                             |         |        |        |      |
| ATOM 2563 | CB    | CB  | . ALA ALA ALA A A 335 335 . | 103.357 | 90.363 | 39.639 | 1.00 |
| 10.87     | 1 . . |     |                             |         |        |        |      |
| ATOM 2564 | C     | C   | . ALA ALA ALA A A 335 335 . | 102.719 | 92.770 | 40.170 | 1.00 |
| 8.14      | 1 . . |     |                             |         |        |        |      |
| ATOM 2565 | O     | O   | . ALA ALA ALA A A 335 335 . | 103.390 | 93.578 | 39.571 | 1.00 |
| 8.05      | 1 . . |     |                             |         |        |        |      |
| ATOM 2566 | N     | N   | . CYS CYS CYS A A 336 336 . | 101.413 | 92.865 | 40.259 | 1.00 |
| 7.26      | 1 . . |     |                             |         |        |        |      |
| ATOM 2567 | CA    | CA  | . CYS CYS CYS A A 336 336 . | 100.679 | 94.041 | 39.753 | 1.00 |
| 7.20      | 1 . . |     |                             |         |        |        |      |
| ATOM 2568 | CB    | CB  | . CYS CYS CYS A A 336 336 . | 100.292 | 93.841 | 38.312 | 1.00 |
| 7.31      | 1 . . |     |                             |         |        |        |      |
| ATOM 2569 | SG    | SG  | . CYS CYS CYS A A 336 336 . | 99.424  | 92.289 | 37.927 | 1.00 |
| 6.54      | 1 . . |     |                             |         |        |        |      |
| ATOM 2570 | C     | C   | . CYS CYS CYS A A 336 336 . | 99.396  | 94.166 | 40.573 | 1.00 |
| 6.64      | 1 . . |     |                             |         |        |        |      |
| ATOM 2571 | O     | O   | . CYS CYS CYS A A 336 336 . | 99.112  | 93.352 | 41.491 | 1.00 |
| 8.86      | 1 . . |     |                             |         |        |        |      |
| ATOM 2572 | N     | N   | . ASN ASN ASN A A 337 337 . | 98.617  | 95.209 | 40.300 | 1.00 |
| 5.91      | 1 . . |     |                             |         |        |        |      |
| ATOM 2573 | CA    | CA  | . ASN ASN ASN A A 337 337 . | 97.396  | 95.400 | 41.120 | 1.00 |
| 5.33      | 1 . . |     |                             |         |        |        |      |
| ATOM 2574 | CB    | CB  | . ASN ASN ASN A A 337 337 . | 97.680  | 96.452 | 42.238 | 1.00 |
| 6.30      | 1 . . |     |                             |         |        |        |      |
| ATOM 2575 | CG    | CG  | . ASN ASN ASN A A 337 337 . | 98.132  | 97.827 | 41.649 | 1.00 |
| 6.86      | 1 . . |     |                             |         |        |        |      |
| ATOM 2576 | OD1   | OD1 | . ASN ASN ASN A A 337 337 . | 99.015  | 98.553 | 42.209 | 1.00 |
| 10.44     | 1 . . |     |                             |         |        |        |      |
| ATOM 2577 | ND2   | ND2 | . ASN ASN ASN A A 337 337 . | 97.536  | 98.194 | 40.527 | 1.00 |
| 5.25      | 1 . . |     |                             |         |        |        |      |
| ATOM 2578 | C     | C   | . ASN ASN ASN A A 337 337 . | 96.175  | 95.727 | 40.277 | 1.00 |
| 4.29      | 1 . . |     |                             |         |        |        |      |
| ATOM 2579 | O     | O   | . ASN ASN ASN A A 337 337 . | 95.112  | 96.151 | 40.824 | 1.00 |
| 4.99      | 1 . . |     |                             |         |        |        |      |
| ATOM 2580 | N     | N   | . CYS CYS CYS A A 338 338 . | 96.328  | 95.422 | 38.970 | 1.00 |
| 3.43      | 1 . . |     |                             |         |        |        |      |











|           |     |     |               |     |         |          |        |        |      |
|-----------|-----|-----|---------------|-----|---------|----------|--------|--------|------|
| ATOM 2689 | N   | N   | . ILE ILE ILE | A A | 353 353 | . 84.926 | 86.526 | 32.167 | 1.00 |
| 3.80      | 1   | . . |               |     |         |          |        |        |      |
| ATOM 2690 | CA  | CA  | . ILE ILE ILE | A A | 353 353 | . 84.117 | 86.919 | 33.348 | 1.00 |
| 4.34      | 1   | . . |               |     |         |          |        |        |      |
| ATOM 2691 | CB  | CB  | . ILE ILE ILE | A A | 353 353 | . 82.659 | 86.526 | 33.201 | 1.00 |
| 3.48      | 1   | . . |               |     |         |          |        |        |      |
| ATOM 2692 | CG1 | CG1 | . ILE ILE ILE | A A | 353 353 | . 82.007 | 87.332 | 32.023 | 1.00 |
| 3.34      | 1   | . . |               |     |         |          |        |        |      |
| ATOM 2693 | CD1 | CD1 | . ILE ILE ILE | A A | 353 353 | . 80.561 | 87.121 | 31.860 | 1.00 |
| 6.87      | 1   | . . |               |     |         |          |        |        |      |
| ATOM 2694 | CG2 | CG2 | . ILE ILE ILE | A A | 353 353 | . 81.882 | 86.835 | 34.540 | 1.00 |
| 4.70      | 1   | . . |               |     |         |          |        |        |      |
| ATOM 2695 | C   | C   | . ILE ILE ILE | A A | 353 353 | . 84.770 | 86.306 | 34.622 | 1.00 |
| 4.45      | 1   | . . |               |     |         |          |        |        |      |
| ATOM 2696 | O   | O   | . ILE ILE ILE | A A | 353 353 | . 84.934 | 87.025 | 35.653 | 1.00 |
| 6.13      | 1   | . . |               |     |         |          |        |        |      |
| ATOM 2697 | N   | N   | . GLN GLN GLN | A A | 354 354 | . 85.186 | 85.047 | 34.550 | 1.00 |
| 5.35      | 1   | . . |               |     |         |          |        |        |      |
| ATOM 2698 | CA  | CA  | . GLN GLN GLN | A A | 354 354 | . 85.903 | 84.415 | 35.693 | 1.00 |
| 4.81      | 1   | . . |               |     |         |          |        |        |      |
| ATOM 2699 | CB  | CB  | . GLN GLN GLN | A A | 354 354 | . 86.170 | 82.938 | 35.416 | 1.00 |
| 5.60      | 1   | . . |               |     |         |          |        |        |      |
| ATOM 2700 | CG  | CG  | . GLN GLN GLN | A A | 354 354 | . 84.958 | 82.049 | 35.581 | 1.00 |
| 12.07     | 1   | . . |               |     |         |          |        |        |      |
| ATOM 2701 | CD  | CD  | . GLN GLN GLN | A A | 354 354 | . 85.082 | 80.674 | 34.884 | 1.00 |
| 14.00     | 1   | . . |               |     |         |          |        |        |      |
| ATOM 2702 | OE1 | OE1 | . GLN GLN GLN | A A | 354 354 | . 84.113 | 79.910 | 34.859 | 1.00 |
| 18.83     | 1   | . . |               |     |         |          |        |        |      |
| ATOM 2703 | NE2 | NE2 | . GLN GLN GLN | A A | 354 354 | . 86.256 | 80.367 | 34.319 | 1.00 |
| 16.29     | 1   | . . |               |     |         |          |        |        |      |
| ATOM 2704 | C   | C   | . GLN GLN GLN | A A | 354 354 | . 87.219 | 85.137 | 35.985 | 1.00 |
| 4.54      | 1   | . . |               |     |         |          |        |        |      |
| ATOM 2705 | O   | O   | . GLN GLN GLN | A A | 354 354 | . 87.535 | 85.301 | 37.135 | 1.00 |
| 4.46      | 1   | . . |               |     |         |          |        |        |      |
| ATOM 2706 | N   | N   | . ALA ALA ALA | A A | 355 355 | . 87.957 | 85.611 | 34.955 | 1.00 |
| 3.75      | 1   | . . |               |     |         |          |        |        |      |
| ATOM 2707 | CA  | CA  | . ALA ALA ALA | A A | 355 355 | . 89.233 | 86.272 | 35.176 | 1.00 |
| 4.40      | 1   | . . |               |     |         |          |        |        |      |
| ATOM 2708 | CB  | CB  | . ALA ALA ALA | A A | 355 355 | . 89.951 | 86.532 | 33.897 | 1.00 |
| 4.70      | 1   | . . |               |     |         |          |        |        |      |
| ATOM 2709 | C   | C   | . ALA ALA ALA | A A | 355 355 | . 89.015 | 87.585 | 35.931 | 1.00 |
| 2.54      | 1   | . . |               |     |         |          |        |        |      |
| ATOM 2710 | O   | O   | . ALA ALA ALA | A A | 355 355 | . 89.781 | 87.922 | 36.850 | 1.00 |
| 3.62      | 1   | . . |               |     |         |          |        |        |      |
| ATOM 2711 | N   | N   | . CYS CYS CYS | A A | 356 356 | . 88.032 | 88.349 | 35.442 | 1.00 |
| 3.47      | 1   | . . |               |     |         |          |        |        |      |
| ATOM 2712 | CA  | CA  | . CYS CYS CYS | A A | 356 356 | . 87.639 | 89.596 | 36.021 | 1.00 |
| 3.12      | 1   | . . |               |     |         |          |        |        |      |
| ATOM 2713 | CB  | CB  | . CYS CYS CYS | A A | 356 356 | . 86.448 | 90.175 | 35.243 | 1.00 |
| 2.66      | 1   | . . |               |     |         |          |        |        |      |
| ATOM 2714 | SG  | SG  | . CYS CYS CYS | A A | 356 356 | . 85.808 | 91.765 | 35.953 | 1.00 |
| 4.12      | 1   | . . |               |     |         |          |        |        |      |
| ATOM 2715 | C   | C   | . CYS CYS CYS | A A | 356 356 | . 87.332 | 89.404 | 37.511 | 1.00 |
| 3.15      | 1   | . . |               |     |         |          |        |        |      |

|               |     |                             |        |        |        |      |
|---------------|-----|-----------------------------|--------|--------|--------|------|
| ATOM 2716 O   | O   | . CYS CYS CYS A A 356 356 . | 87.927 | 90.116 | 38.375 | 1.00 |
| 4.49 1 . .    |     |                             |        |        |        |      |
| ATOM 2717 N   | N   | . LYS LYS LYS A A 357 357 . | 86.433 | 88.429 | 37.793 | 1.00 |
| 5.25 1 . .    |     |                             |        |        |        |      |
| ATOM 2718 CA  | CA  | . LYS LYS LYS A A 357 357 . | 85.951 | 88.224 | 39.159 | 1.00 |
| 6.84 1 . .    |     |                             |        |        |        |      |
| ATOM 2719 CB  | CB  | . LYS LYS LYS A A 357 357 . | 84.810 | 87.223 | 39.229 | 1.00 |
| 6.29 1 . .    |     |                             |        |        |        |      |
| ATOM 2720 CG  | CG  | . LYS LYS LYS A A 357 357 . | 83.496 | 87.834 | 38.695 | 1.00 |
| 12.95 1 . .   |     |                             |        |        |        |      |
| ATOM 2721 CD  | CD  | . LYS LYS LYS A A 357 357 . | 82.325 | 86.877 | 38.681 | 1.00 |
| 16.98 1 . .   |     |                             |        |        |        |      |
| ATOM 2722 CE  | CE  | . LYS LYS LYS A A 357 357 . | 81.971 | 86.510 | 40.097 | 1.00 |
| 20.09 1 . .   |     |                             |        |        |        |      |
| ATOM 2723 NZ  | NZ  | . LYS LYS LYS A A 357 357 . | 80.568 | 86.110 | 40.155 | 1.00 |
| 24.36 1 . .   |     |                             |        |        |        |      |
| ATOM 2724 C   | C   | . LYS LYS LYS A A 357 357 . | 87.052 | 87.804 | 40.064 | 1.00 |
| 5.09 1 . .    |     |                             |        |        |        |      |
| ATOM 2725 O   | O   | . LYS LYS LYS A A 357 357 . | 87.063 | 88.253 | 41.228 | 1.00 |
| 6.98 1 . .    |     |                             |        |        |        |      |
| ATOM 2726 N   | N   | . LEU LEU LEU A A 358 358 . | 87.990 | 87.004 | 39.539 | 1.00 |
| 5.69 1 . .    |     |                             |        |        |        |      |
| ATOM 2727 CA  | CA  | . LEU LEU LEU A A 358 358 . | 89.189 | 86.585 | 40.277 | 1.00 |
| 5.62 1 . .    |     |                             |        |        |        |      |
| ATOM 2728 CB  | CB  | . LEU LEU LEU A A 358 358 . | 90.044 | 85.623 | 39.446 | 1.00 |
| 7.76 1 . .    |     |                             |        |        |        |      |
| ATOM 2729 CG  | CG  | . LEU LEU LEU A A 358 358 . | 91.259 | 85.015 | 40.107 | 1.00 |
| 7.67 1 . .    |     |                             |        |        |        |      |
| ATOM 2730 CD1 | CD1 | . LEU LEU LEU A A 358 358 . | 90.941 | 84.319 | 41.448 | 1.00 |
| 9.68 1 . .    |     |                             |        |        |        |      |
| ATOM 2731 CD2 | CD2 | . LEU LEU LEU A A 358 358 . | 92.046 | 84.053 | 39.132 | 1.00 |
| 7.04 1 . .    |     |                             |        |        |        |      |
| ATOM 2732 C   | C   | . LEU LEU LEU A A 358 358 . | 89.992 | 87.803 | 40.672 | 1.00 |
| 4.88 1 . .    |     |                             |        |        |        |      |
| ATOM 2733 O   | O   | . LEU LEU LEU A A 358 358 . | 90.419 | 87.972 | 41.838 | 1.00 |
| 6.22 1 . .    |     |                             |        |        |        |      |
| ATOM 2734 N   | N   | . ALA ALA ALA A A 359 359 . | 90.183 | 88.723 | 39.734 | 1.00 |
| 4.67 1 . .    |     |                             |        |        |        |      |
| ATOM 2735 CA  | CA  | . ALA ALA ALA A A 359 359 . | 91.018 | 89.883 | 40.014 | 1.00 |
| 5.92 1 . .    |     |                             |        |        |        |      |
| ATOM 2736 CB  | CB  | . ALA ALA ALA A A 359 359 . | 91.199 | 90.713 | 38.705 | 1.00 |
| 5.90 1 . .    |     |                             |        |        |        |      |
| ATOM 2737 C   | C   | . ALA ALA ALA A A 359 359 . | 90.313 | 90.723 | 41.098 | 1.00 |
| 6.39 1 . .    |     |                             |        |        |        |      |
| ATOM 2738 O   | O   | . ALA ALA ALA A A 359 359 . | 90.932 | 91.127 | 42.122 | 1.00 |
| 7.90 1 . .    |     |                             |        |        |        |      |
| ATOM 2739 N   | N   | . GLN GLN GLN A A 360 360 . | 88.998 | 90.891 | 40.920 | 1.00 |
| 5.19 1 . .    |     |                             |        |        |        |      |
| ATOM 2740 CA  | CA  | . GLN GLN GLN A A 360 360 . | 88.233 | 91.835 | 41.782 | 1.00 |
| 7.00 1 . .    |     |                             |        |        |        |      |
| ATOM 2741 CB  | CB  | . GLN GLN GLN A A 360 360 . | 86.832 | 92.155 | 41.273 | 1.00 |
| 6.81 1 . .    |     |                             |        |        |        |      |
| ATOM 2742 CG  | CG  | . GLN GLN GLN A A 360 360 . | 86.829 | 92.932 | 39.944 | 1.00 |
| 5.10 1 . .    |     |                             |        |        |        |      |

|           |       |     |                             |        |        |        |      |
|-----------|-------|-----|-----------------------------|--------|--------|--------|------|
| ATOM 2743 | CD    | CD  | . GLN GLN GLN A A 360 360 . | 85.444 | 93.088 | 39.377 | 1.00 |
| 5.88      | 1 . . |     |                             |        |        |        |      |
| ATOM 2744 | OE1   | OE1 | . GLN GLN GLN A A 360 360 . | 85.105 | 94.174 | 38.776 | 1.00 |
| 9.12      | 1 . . |     |                             |        |        |        |      |
| ATOM 2745 | NE2   | NE2 | . GLN GLN GLN A A 360 360 . | 84.675 | 91.986 | 39.389 | 1.00 |
| 5.26      | 1 . . |     |                             |        |        |        |      |
| ATOM 2746 | C     | C   | . GLN GLN GLN A A 360 360 . | 88.139 | 91.261 | 43.197 | 1.00 |
| 8.96      | 1 . . |     |                             |        |        |        |      |
| ATOM 2747 | O     | O   | . GLN GLN GLN A A 360 360 . | 88.228 | 92.024 | 44.157 | 1.00 |
| 9.56      | 1 . . |     |                             |        |        |        |      |
| ATOM 2748 | N     | N   | . GLU GLU GLU A A 361 361 . | 88.056 | 89.944 | 43.299 | 1.00 |
| 8.55      | 1 . . |     |                             |        |        |        |      |
| ATOM 2749 | CA    | CA  | . GLU GLU GLU A A 361 361 . | 88.047 | 89.279 | 44.602 | 1.00 |
| 10.48     | 1 . . |     |                             |        |        |        |      |
| ATOM 2750 | CB    | CB  | . GLU GLU GLU A A 361 361 . | 87.754 | 87.785 | 44.386 | 1.00 |
| 11.12     | 1 . . |     |                             |        |        |        |      |
| ATOM 2751 | CG    | CG  | . GLU GLU GLU A A 361 361 . | 86.295 | 87.420 | 44.154 | 1.00 |
| 16.04     | 1 . . |     |                             |        |        |        |      |
| ATOM 2752 | CD    | CD  | . GLU GLU GLU A A 361 361 . | 86.072 | 85.995 | 43.614 | 1.00 |
| 21.76     | 1 . . |     |                             |        |        |        |      |
| ATOM 2753 | OE1   | OE1 | . GLU GLU GLU A A 361 361 . | 87.039 | 85.183 | 43.559 | 1.00 |
| 22.26     | 1 . . |     |                             |        |        |        |      |
| ATOM 2754 | OE2   | OE2 | . GLU GLU GLU A A 361 361 . | 84.914 | 85.678 | 43.234 | 1.00 |
| 25.39     | 1 . . |     |                             |        |        |        |      |
| ATOM 2755 | C     | C   | . GLU GLU GLU A A 361 361 . | 89.420 | 89.446 | 45.322 | 1.00 |
| 10.44     | 1 . . |     |                             |        |        |        |      |
| ATOM 2756 | O     | O   | . GLU GLU GLU A A 361 361 . | 89.505 | 89.364 | 46.564 | 1.00 |
| 12.54     | 1 . . |     |                             |        |        |        |      |
| ATOM 2757 | N     | N   | . ASN ASN ASN A A 362 362 . | 90.484 | 89.657 | 44.571 | 1.00 |
| 9.06      | 1 . . |     |                             |        |        |        |      |
| ATOM 2758 | CA    | CA  | . ASN ASN ASN A A 362 362 . | 91.805 | 89.876 | 45.126 | 1.00 |
| 9.16      | 1 . . |     |                             |        |        |        |      |
| ATOM 2759 | CB    | CB  | . ASN ASN ASN A A 362 362 . | 92.885 | 89.046 | 44.396 | 1.00 |
| 9.39      | 1 . . |     |                             |        |        |        |      |
| ATOM 2760 | CG    | CG  | . ASN ASN ASN A A 362 362 . | 92.804 | 87.578 | 44.795 | 1.00 |
| 11.54     | 1 . . |     |                             |        |        |        |      |
| ATOM 2761 | OD1   | OD1 | . ASN ASN ASN A A 362 362 . | 93.340 | 87.203 | 45.829 | 1.00 |
| 12.94     | 1 . . |     |                             |        |        |        |      |
| ATOM 2762 | ND2   | ND2 | . ASN ASN ASN A A 362 362 . | 92.059 | 86.755 | 44.012 | 1.00 |
| 12.06     | 1 . . |     |                             |        |        |        |      |
| ATOM 2763 | C     | C   | . ASN ASN ASN A A 362 362 . | 92.174 | 91.368 | 45.332 | 1.00 |
| 8.27      | 1 . . |     |                             |        |        |        |      |
| ATOM 2764 | O     | O   | . ASN ASN ASN A A 362 362 . | 93.319 | 91.687 | 45.588 | 1.00 |
| 10.62     | 1 . . |     |                             |        |        |        |      |
| ATOM 2765 | N     | N   | . GLY GLY GLY A A 363 363 . | 91.175 | 92.254 | 45.256 | 1.00 |
| 7.49      | 1 . . |     |                             |        |        |        |      |
| ATOM 2766 | CA    | CA  | . GLY GLY GLY A A 363 363 . | 91.373 | 93.678 | 45.461 | 1.00 |
| 7.89      | 1 . . |     |                             |        |        |        |      |
| ATOM 2767 | C     | C   | . GLY GLY GLY A A 363 363 . | 92.031 | 94.391 | 44.298 | 1.00 |
| 8.66      | 1 . . |     |                             |        |        |        |      |
| ATOM 2768 | O     | O   | . GLY GLY GLY A A 363 363 . | 92.450 | 95.541 | 44.409 | 1.00 |
| 9.25      | 1 . . |     |                             |        |        |        |      |
| ATOM 2769 | N     | N   | . TRP TRP TRP A A 364 364 . | 92.153 | 93.714 | 43.152 | 1.00 |
| 5.93      | 1 . . |     |                             |        |        |        |      |

























|           |     |       |                             |        |         |        |      |
|-----------|-----|-------|-----------------------------|--------|---------|--------|------|
| ATOM 3067 | C   | C     | . LEU LEU LEU A A 403 403 . | 83.221 | 104.575 | 18.649 | 1.00 |
| 2.08      | 1   | . . . |                             |        |         |        |      |
| ATOM 3068 | O   | O     | . LEU LEU LEU A A 403 403 . | 82.283 | 104.885 | 19.416 | 1.00 |
| 2.17      | 1   | . . . |                             |        |         |        |      |
| ATOM 3069 | N   | N     | . ALA ALA ALA A A 404 404 . | 83.189 | 103.456 | 17.925 | 1.00 |
| 2.00      | 1   | . . . |                             |        |         |        |      |
| ATOM 3070 | CA  | CA    | . ALA ALA ALA A A 404 404 . | 81.987 | 102.626 | 18.063 | 1.00 |
| 2.01      | 1   | . . . |                             |        |         |        |      |
| ATOM 3071 | CB  | CB    | . ALA ALA ALA A A 404 404 . | 82.026 | 101.417 | 17.115 | 1.00 |
| 2.24      | 1   | . . . |                             |        |         |        |      |
| ATOM 3072 | C   | C     | . ALA ALA ALA A A 404 404 . | 81.727 | 102.190 | 19.516 | 1.00 |
| 2.10      | 1   | . . . |                             |        |         |        |      |
| ATOM 3073 | O   | O     | . ALA ALA ALA A A 404 404 . | 80.584 | 102.229 | 19.985 | 1.00 |
| 2.12      | 1   | . . . |                             |        |         |        |      |
| ATOM 3074 | N   | N     | . LYS LYS LYS A A 405 405 . | 82.808 | 101.893 | 20.210 | 1.00 |
| 2.09      | 1   | . . . |                             |        |         |        |      |
| ATOM 3075 | CA  | CA    | . LYS LYS LYS A A 405 405 . | 82.644 | 101.537 | 21.647 | 1.00 |
| 2.11      | 1   | . . . |                             |        |         |        |      |
| ATOM 3076 | CB  | CB    | . LYS LYS LYS A A 405 405 . | 83.928 | 100.935 | 22.177 | 1.00 |
| 2.19      | 1   | . . . |                             |        |         |        |      |
| ATOM 3077 | CG  | CG    | . LYS LYS LYS A A 405 405 . | 84.202 | 99.488  | 21.764 | 1.00 |
| 2.65      | 1   | . . . |                             |        |         |        |      |
| ATOM 3078 | CD  | CD    | . LYS LYS LYS A A 405 405 . | 84.588 | 99.345  | 20.282 | 1.00 |
| 3.21      | 1   | . . . |                             |        |         |        |      |
| ATOM 3079 | CE  | CE    | . LYS LYS LYS A A 405 405 . | 85.333 | 98.024  | 20.072 | 1.00 |
| 3.99      | 1   | . . . |                             |        |         |        |      |
| ATOM 3080 | NZ  | NZ    | . LYS LYS LYS A A 405 405 . | 85.478 | 97.742  | 18.559 | 1.00 |
| 2.37      | 1   | . . . |                             |        |         |        |      |
| ATOM 3081 | C   | C     | . LYS LYS LYS A A 405 405 . | 82.262 | 102.761 | 22.497 | 1.00 |
| 2.00      | 1   | . . . |                             |        |         |        |      |
| ATOM 3082 | O   | O     | . LYS LYS LYS A A 405 405 . | 81.408 | 102.694 | 23.375 | 1.00 |
| 2.00      | 1   | . . . |                             |        |         |        |      |
| ATOM 3083 | N   | N     | . TYR TYR TYR A A 406 406 . | 82.996 | 103.871 | 22.281 | 1.00 |
| 2.13      | 1   | . . . |                             |        |         |        |      |
| ATOM 3084 | CA  | CA    | . TYR TYR TYR A A 406 406 . | 82.741 | 105.053 | 23.090 | 1.00 |
| 2.08      | 1   | . . . |                             |        |         |        |      |
| ATOM 3085 | CB  | CB    | . TYR TYR TYR A A 406 406 . | 83.788 | 106.140 | 22.813 | 1.00 |
| 2.74      | 1   | . . . |                             |        |         |        |      |
| ATOM 3086 | CG  | CG    | . TYR TYR TYR A A 406 406 . | 85.145 | 105.812 | 23.277 | 1.00 |
| 2.00      | 1   | . . . |                             |        |         |        |      |
| ATOM 3087 | CD1 | CD1   | . TYR TYR TYR A A 406 406 . | 85.427 | 105.416 | 24.601 | 1.00 |
| 2.12      | 1   | . . . |                             |        |         |        |      |
| ATOM 3088 | CE1 | CE1   | . TYR TYR TYR A A 406 406 . | 86.728 | 105.115 | 25.004 | 1.00 |
| 2.00      | 1   | . . . |                             |        |         |        |      |
| ATOM 3089 | CZ  | CZ    | . TYR TYR TYR A A 406 406 . | 87.783 | 105.189 | 24.111 | 1.00 |
| 2.54      | 1   | . . . |                             |        |         |        |      |
| ATOM 3090 | OH  | OH    | . TYR TYR TYR A A 406 406 . | 89.070 | 104.890 | 24.528 | 1.00 |
| 2.30      | 1   | . . . |                             |        |         |        |      |
| ATOM 3091 | CE2 | CE2   | . TYR TYR TYR A A 406 406 . | 87.527 | 105.614 | 22.783 | 1.00 |
| 2.40      | 1   | . . . |                             |        |         |        |      |
| ATOM 3092 | CD2 | CD2   | . TYR TYR TYR A A 406 406 . | 86.256 | 105.901 | 22.372 | 1.00 |
| 2.28      | 1   | . . . |                             |        |         |        |      |
| ATOM 3093 | C   | C     | . TYR TYR TYR A A 406 406 . | 81.275 | 105.558 | 22.883 | 1.00 |
| 2.00      | 1   | . . . |                             |        |         |        |      |







|           |       |     |                   |         |          |         |        |      |
|-----------|-------|-----|-------------------|---------|----------|---------|--------|------|
| ATOM 3148 | CA    | CA  | . GLU GLU GLU A A | 413 413 | . 74.614 | 105.927 | 29.973 | 1.00 |
| 2.50      | 1 . . |     |                   |         |          |         |        |      |
| ATOM 3149 | CB    | CB  | . GLU GLU GLU A A | 413 413 | . 75.759 | 106.948 | 29.999 | 1.00 |
| 2.24      | 1 . . |     |                   |         |          |         |        |      |
| ATOM 3150 | CG    | CG  | . GLU GLU GLU A A | 413 413 | . 75.642 | 108.021 | 31.140 | 1.00 |
| 3.89      | 1 . . |     |                   |         |          |         |        |      |
| ATOM 3151 | CD    | CD  | . GLU GLU GLU A A | 413 413 | . 76.763 | 108.886 | 31.160 | 1.00 |
| 4.27      | 1 . . |     |                   |         |          |         |        |      |
| ATOM 3152 | OE1   | OE1 | . GLU GLU GLU A A | 413 413 | . 76.907 | 109.623 | 30.151 | 1.00 |
| 5.19      | 1 . . |     |                   |         |          |         |        |      |
| ATOM 3153 | OE2   | OE2 | . GLU GLU GLU A A | 413 413 | . 77.545 | 108.809 | 32.135 | 1.00 |
| 8.43      | 1 . . |     |                   |         |          |         |        |      |
| ATOM 3154 | C     | C   | . GLU GLU GLU A A | 413 413 | . 73.229 | 106.582 | 29.840 | 1.00 |
| 3.26      | 1 . . |     |                   |         |          |         |        |      |
| ATOM 3155 | O     | O   | . GLU GLU GLU A A | 413 413 | . 72.460 | 106.741 | 30.853 | 1.00 |
| 5.58      | 1 . . |     |                   |         |          |         |        |      |
| ATOM 3156 | N     | N   | . GLU GLU GLU A A | 414 414 | . 72.840 | 106.910 | 28.604 | 1.00 |
| 3.85      | 1 . . |     |                   |         |          |         |        |      |
| ATOM 3157 | CA    | CA  | . GLU GLU GLU A A | 414 414 | . 71.536 | 107.437 | 28.303 | 1.00 |
| 6.92      | 1 . . |     |                   |         |          |         |        |      |
| ATOM 3158 | CB    | CB  | . GLU GLU GLU A A | 414 414 | . 71.408 | 107.690 | 26.787 | 1.00 |
| 6.69      | 1 . . |     |                   |         |          |         |        |      |
| ATOM 3159 | CG    | CG  | . GLU GLU GLU A A | 414 414 | . 70.214 | 108.417 | 26.329 | 1.00 |
| 11.57     | 1 . . |     |                   |         |          |         |        |      |
| ATOM 3160 | CD    | CD  | . GLU GLU GLU A A | 414 414 | . 70.356 | 108.662 | 24.844 | 1.00 |
| 15.06     | 1 . . |     |                   |         |          |         |        |      |
| ATOM 3161 | OE1   | OE1 | . GLU GLU GLU A A | 414 414 | . 71.331 | 109.320 | 24.433 | 1.00 |
| 15.67     | 1 . . |     |                   |         |          |         |        |      |
| ATOM 3162 | OE2   | OE2 | . GLU GLU GLU A A | 414 414 | . 69.517 | 108.134 | 24.125 | 1.00 |
| 18.52     | 1 . . |     |                   |         |          |         |        |      |
| ATOM 3163 | C     | C   | . GLU GLU GLU A A | 414 414 | . 70.447 | 106.491 | 28.736 | 1.00 |
| 7.87      | 1 . . |     |                   |         |          |         |        |      |
| ATOM 3164 | O     | O   | . GLU GLU GLU A A | 414 414 | . 69.465 | 106.908 | 29.322 | 1.00 |
| 10.95     | 1 . . |     |                   |         |          |         |        |      |
| ATOM 3165 | N     | N   | . GLU GLU GLU A A | 415 415 | . 70.674 | 105.207 | 28.531 | 1.00 |
| 7.61      | 1 . . |     |                   |         |          |         |        |      |
| ATOM 3166 | CA    | CA  | . GLU GLU GLU A A | 415 415 | . 69.642 | 104.193 | 28.808 | 1.00 |
| 8.94      | 1 . . |     |                   |         |          |         |        |      |
| ATOM 3167 | CB    | CB  | . GLU GLU GLU A A | 415 415 | . 70.031 | 102.862 | 28.164 | 1.00 |
| 10.67     | 1 . . |     |                   |         |          |         |        |      |
| ATOM 3168 | CG    | CG  | . GLU GLU GLU A A | 415 415 | . 69.143 | 101.635 | 28.487 | 1.00 |
| 15.51     | 1 . . |     |                   |         |          |         |        |      |
| ATOM 3169 | CD    | CD  | . GLU GLU GLU A A | 415 415 | . 67.785 | 101.753 | 27.908 | 1.00 |
| 22.84     | 1 . . |     |                   |         |          |         |        |      |
| ATOM 3170 | OE1   | OE1 | . GLU GLU GLU A A | 415 415 | . 66.804 | 101.782 | 28.694 | 1.00 |
| 27.04     | 1 . . |     |                   |         |          |         |        |      |
| ATOM 3171 | OE2   | OE2 | . GLU GLU GLU A A | 415 415 | . 67.672 | 101.809 | 26.667 | 1.00 |
| 25.26     | 1 . . |     |                   |         |          |         |        |      |
| ATOM 3172 | C     | C   | . GLU GLU GLU A A | 415 415 | . 69.443 | 103.991 | 30.302 | 1.00 |
| 8.36      | 1 . . |     |                   |         |          |         |        |      |
| ATOM 3173 | O     | O   | . GLU GLU GLU A A | 415 415 | . 68.331 | 103.664 | 30.742 | 1.00 |
| 11.57     | 1 . . |     |                   |         |          |         |        |      |
| ATOM 3174 | N     | N   | . LEU LEU LEU A A | 416 416 | . 70.552 | 104.094 | 31.050 | 1.00 |
| 8.89      | 1 . . |     |                   |         |          |         |        |      |

|           |       |     |                   |         |          |         |        |      |
|-----------|-------|-----|-------------------|---------|----------|---------|--------|------|
| ATOM 3175 | CA    | CA  | . LEU LEU LEU A A | 416 416 | . 70.508 | 103.946 | 32.524 | 1.00 |
| 10.59     | 1 . . |     |                   |         |          |         |        |      |
| ATOM 3176 | CB    | CB  | . LEU LEU LEU A A | 416 416 | . 71.890 | 103.537 | 33.099 | 1.00 |
| 8.64      | 1 . . |     |                   |         |          |         |        |      |
| ATOM 3177 | CG    | CG  | . LEU LEU LEU A A | 416 416 | . 72.460 | 102.159 | 32.786 | 1.00 |
| 8.63      | 1 . . |     |                   |         |          |         |        |      |
| ATOM 3178 | CD1   | CD1 | . LEU LEU LEU A A | 416 416 | . 73.948 | 102.123 | 33.184 | 1.00 |
| 12.93     | 1 . . |     |                   |         |          |         |        |      |
| ATOM 3179 | CD2   | CD2 | . LEU LEU LEU A A | 416 416 | . 71.633 | 101.079 | 33.490 | 1.00 |
| 13.93     | 1 . . |     |                   |         |          |         |        |      |
| ATOM 3180 | C     | C   | . LEU LEU LEU A A | 416 416 | . 69.881 | 105.190 | 33.238 | 1.00 |
| 13.74     | 1 . . |     |                   |         |          |         |        |      |
| ATOM 3181 | O     | O   | . LEU LEU LEU A A | 416 416 | . 69.295 | 105.107 | 34.347 | 1.00 |
| 14.44     | 1 . . |     |                   |         |          |         |        |      |
| ATOM 3182 | N     | N   | . GLY GLY GLY A A | 417 417 | . 70.040 | 106.366 | 32.631 | 1.00 |
| 16.35     | 1 . . |     |                   |         |          |         |        |      |
| ATOM 3183 | CA    | CA  | . GLY GLY GLY A A | 417 417 | . 69.500 | 107.618 | 33.191 | 1.00 |
| 21.79     | 1 . . |     |                   |         |          |         |        |      |
| ATOM 3184 | C     | C   | . GLY GLY GLY A A | 417 417 | . 70.032 | 107.929 | 34.567 | 1.00 |
| 24.73     | 1 . . |     |                   |         |          |         |        |      |
| ATOM 3185 | O     | O   | . GLY GLY GLY A A | 417 417 | . 71.203 | 107.736 | 34.804 | 1.00 |
| 26.22     | 1 . . |     |                   |         |          |         |        |      |
| ATOM 3186 | N     | N   | . ASP ASP ASP A A | 418 418 | . 69.167 | 108.353 | 35.499 | 1.00 |
| 27.81     | 1 . . |     |                   |         |          |         |        |      |
| ATOM 3187 | CA    | CA  | . ASP ASP ASP A A | 418 418 | . 69.557 | 108.537 | 36.921 | 1.00 |
| 30.05     | 1 . . |     |                   |         |          |         |        |      |
| ATOM 3188 | CB    | CB  | . ASP ASP ASP A A | 418 418 | . 68.393 | 109.083 | 37.749 | 1.00 |
| 30.74     | 1 . . |     |                   |         |          |         |        |      |
| ATOM 3189 | CG    | CG  | . ASP ASP ASP A A | 418 418 | . 68.592 | 110.526 | 38.155 | 1.00 |
| 33.96     | 1 . . |     |                   |         |          |         |        |      |
| ATOM 3190 | OD1   | OD1 | . ASP ASP ASP A A | 418 418 | . 68.504 | 110.814 | 39.371 | 1.00 |
| 35.20     | 1 . . |     |                   |         |          |         |        |      |
| ATOM 3191 | OD2   | OD2 | . ASP ASP ASP A A | 418 418 | . 68.832 | 111.371 | 37.260 | 1.00 |
| 37.68     | 1 . . |     |                   |         |          |         |        |      |
| ATOM 3192 | C     | C   | . ASP ASP ASP A A | 418 418 | . 70.116 | 107.320 | 37.649 | 1.00 |
| 29.95     | 1 . . |     |                   |         |          |         |        |      |
| ATOM 3193 | O     | O   | . ASP ASP ASP A A | 418 418 | . 70.574 | 107.431 | 38.788 | 1.00 |
| 31.62     | 1 . . |     |                   |         |          |         |        |      |
| ATOM 3194 | N     | N   | . GLU GLU GLU A A | 419 419 | . 70.061 | 106.157 | 37.020 | 1.00 |
| 29.76     | 1 . . |     |                   |         |          |         |        |      |
| ATOM 3195 | CA    | CA  | . GLU GLU GLU A A | 419 419 | . 70.689 | 104.972 | 37.574 | 1.00 |
| 29.19     | 1 . . |     |                   |         |          |         |        |      |
| ATOM 3196 | CB    | CB  | . GLU GLU GLU A A | 419 419 | . 69.972 | 103.734 | 37.083 | 1.00 |
| 29.84     | 1 . . |     |                   |         |          |         |        |      |
| ATOM 3197 | CG    | CG  | . GLU GLU GLU A A | 419 419 | . 70.380 | 102.452 | 37.747 | 1.00 |
| 33.97     | 1 . . |     |                   |         |          |         |        |      |
| ATOM 3198 | CD    | CD  | . GLU GLU GLU A A | 419 419 | . 69.426 | 101.354 | 37.389 | 1.00 |
| 39.74     | 1 . . |     |                   |         |          |         |        |      |
| ATOM 3199 | OE1   | OE1 | . GLU GLU GLU A A | 419 419 | . 69.875 | 100.332 | 36.790 | 1.00 |
| 41.63     | 1 . . |     |                   |         |          |         |        |      |
| ATOM 3200 | OE2   | OE2 | . GLU GLU GLU A A | 419 419 | . 68.216 | 101.535 | 37.679 | 1.00 |
| 40.35     | 1 . . |     |                   |         |          |         |        |      |
| ATOM 3201 | C     | C   | . GLU GLU GLU A A | 419 419 | . 72.151 | 104.936 | 37.115 | 1.00 |
| 27.12     | 1 . . |     |                   |         |          |         |        |      |

|               |     |                                                        |
|---------------|-----|--------------------------------------------------------|
| ATOM 3202 O   | O   | . GLU GLU GLU A A 419 419 . 72.929 104.122 37.573 1.00 |
| 25.91 1 . .   |     |                                                        |
| ATOM 3203 N   | N   | . ALA ALA ALA A A 420 420 . 72.512 105.809 36.175 1.00 |
| 24.85 1 . .   |     |                                                        |
| ATOM 3204 CA  | CA  | . ALA ALA ALA A A 420 420 . 73.904 105.886 35.750 1.00 |
| 22.56 1 . .   |     |                                                        |
| ATOM 3205 CB  | CB  | . ALA ALA ALA A A 420 420 . 74.035 106.646 34.401 1.00 |
| 22.43 1 . .   |     |                                                        |
| ATOM 3206 C   | C   | . ALA ALA ALA A A 420 420 . 74.789 106.505 36.847 1.00 |
| 21.04 1 . .   |     |                                                        |
| ATOM 3207 O   | O   | . ALA ALA ALA A A 420 420 . 74.476 107.570 37.384 1.00 |
| 22.65 1 . .   |     |                                                        |
| ATOM 3208 N   | N   | . ARG ARG ARG A A 421 421 . 75.845 105.805 37.249 1.00 |
| 18.85 1 . .   |     |                                                        |
| ATOM 3209 CA  | CA  | . ARG ARG ARG A A 421 421 . 76.893 106.425 38.124 1.00 |
| 13.40 1 . .   |     |                                                        |
| ATOM 3210 CB  | CB  | . ARG ARG ARG A A 421 421 . 77.000 105.775 39.519 1.00 |
| 15.38 1 . .   |     |                                                        |
| ATOM 3211 CG  | CG  | . ARG ARG ARG A A 421 421 . 75.811 105.914 40.476 1.00 |
| 16.13 1 . .   |     |                                                        |
| ATOM 3212 CD  | CD  | . ARG ARG ARG A A 421 421 . 75.895 107.177 41.278 1.00 |
| 23.03 1 . .   |     |                                                        |
| ATOM 3213 NE  | NE  | . ARG ARG ARG A A 421 421 . 74.585 107.745 41.637 1.00 |
| 28.44 1 . .   |     |                                                        |
| ATOM 3214 CZ  | CZ  | . ARG ARG ARG A A 421 421 . 73.410 107.114 41.570 1.00 |
| 30.26 1 . .   |     |                                                        |
| ATOM 3215 NH1 | NH1 | . ARG ARG ARG A A 421 421 . 73.338 105.847 41.176 1.00 |
| 31.24 1 . .   |     |                                                        |
| ATOM 3216 NH2 | NH2 | . ARG ARG ARG A A 421 421 . 72.295 107.758 41.906 1.00 |
| 31.74 1 . .   |     |                                                        |
| ATOM 3217 C   | C   | . ARG ARG ARG A A 421 421 . 78.227 106.232 37.374 1.00 |
| 9.64 1 . .    |     |                                                        |
| ATOM 3218 O   | O   | . ARG ARG ARG A A 421 421 . 78.539 105.131 36.903 1.00 |
| 10.54 1 . .   |     |                                                        |
| ATOM 3219 N   | N   | . PHE PHE PHE A A 422 422 . 79.012 107.290 37.308 1.00 |
| 5.39 1 . .    |     |                                                        |
| ATOM 3220 CA  | CA  | . PHE PHE PHE A A 422 422 . 80.309 107.310 36.702 1.00 |
| 4.09 1 . .    |     |                                                        |
| ATOM 3221 CB  | CB  | . PHE PHE PHE A A 422 422 . 80.454 108.720 36.069 1.00 |
| 2.44 1 . .    |     |                                                        |
| ATOM 3222 CG  | CG  | . PHE PHE PHE A A 422 422 . 81.709 108.970 35.364 1.00 |
| 3.40 1 . .    |     |                                                        |
| ATOM 3223 CD1 | CD1 | . PHE PHE PHE A A 422 422 . 82.054 108.235 34.225 1.00 |
| 2.75 1 . .    |     |                                                        |
| ATOM 3224 CE1 | CE1 | . PHE PHE PHE A A 422 422 . 83.245 108.515 33.562 1.00 |
| 2.77 1 . .    |     |                                                        |
| ATOM 3225 CZ  | CZ  | . PHE PHE PHE A A 422 422 . 84.102 109.450 34.084 1.00 |
| 4.18 1 . .    |     |                                                        |
| ATOM 3226 CE2 | CE2 | . PHE PHE PHE A A 422 422 . 83.751 110.188 35.210 1.00 |
| 2.21 1 . .    |     |                                                        |
| ATOM 3227 CD2 | CD2 | . PHE PHE PHE A A 422 422 . 82.556 109.976 35.790 1.00 |
| 2.49 1 . .    |     |                                                        |
| ATOM 3228 C   | C   | . PHE PHE PHE A A 422 422 . 81.364 107.009 37.741 1.00 |
| 3.43 1 . .    |     |                                                        |





|           |       |     |                                                        |
|-----------|-------|-----|--------------------------------------------------------|
| ATOM 3283 | OD1   | OD1 | . ASN ASN ASN A A 429 429 . 88.911 103.431 44.014 1.00 |
| 19.66     | 1 . . |     |                                                        |
| ATOM 3284 | ND2   | ND2 | . ASN ASN ASN A A 429 429 . 87.855 102.862 45.894 1.00 |
| 18.20     | 1 . . |     |                                                        |
| ATOM 3285 | C     | C   | . ASN ASN ASN A A 429 429 . 86.128 101.168 42.938 1.00 |
| 11.00     | 1 . . |     |                                                        |
| ATOM 3286 | O     | O   | . ASN ASN ASN A A 429 429 . 85.691 101.765 43.905 1.00 |
| 10.67     | 1 . . |     |                                                        |
| ATOM 3287 | N     | N   | . PRO PRO PRO A A 430 430 . 85.353 100.974 41.832 1.00 |
| 9.46      | 1 . . |     |                                                        |
| ATOM 3288 | CA    | CA  | . PRO PRO PRO A A 430 430 . 84.043 101.600 41.821 1.00 |
| 11.29     | 1 . . |     |                                                        |
| ATOM 3289 | CB    | CB  | . PRO PRO PRO A A 430 430 . 83.602 101.490 40.356 1.00 |
| 11.86     | 1 . . |     |                                                        |
| ATOM 3290 | CG    | CG  | . PRO PRO PRO A A 430 430 . 84.368 100.438 39.779 1.00 |
| 11.14     | 1 . . |     |                                                        |
| ATOM 3291 | CD    | CD  | . PRO PRO PRO A A 430 430 . 85.651 100.299 40.544 1.00 |
| 10.34     | 1 . . |     |                                                        |
| ATOM 3292 | C     | C   | . PRO PRO PRO A A 430 430 . 82.943 101.014 42.693 1.00 |
| 12.30     | 1 . . |     |                                                        |
| ATOM 3293 | O     | O   | . PRO PRO PRO A A 430 430 . 81.853 101.607 42.745 1.00 |
| 10.64     | 1 . . |     |                                                        |
| ATOM 3294 | N     | N   | . SER SER SER A A 431 431 . 83.202 99.890 43.353 1.00  |
| 13.49     | 1 . . |     |                                                        |
| ATOM 3295 | CA    | CA  | . SER SER SER A A 431 431 . 82.121 99.265 44.164 1.00  |
| 15.48     | 1 . . |     |                                                        |
| ATOM 3296 | CB    | CB  | . SER SER SER A A 431 431 . 82.571 97.927 44.737 1.00  |
| 16.02     | 1 . . |     |                                                        |
| ATOM 3297 | OG    | OG  | . SER SER SER A A 431 431 . 83.762 98.116 45.498 1.00  |
| 17.76     | 1 . . |     |                                                        |
| ATOM 3298 | C     | C   | . SER SER SER A A 431 431 . 81.662 100.207 45.296 1.00 |
| 16.11     | 1 . . |     |                                                        |
| ATOM 3299 | O     | O   | . SER SER SER A A 431 431 . 80.552 100.066 45.862 1.00 |
| 17.98     | 1 . . |     |                                                        |
| ATOM 3300 | N     | N   | . VAL VAL VAL A A 432 432 . 82.508 101.177 45.628 1.00 |
| 16.00     | 1 . . |     |                                                        |
| ATOM 3301 | CA    | CA  | . VAL VAL VAL A A 432 432 . 82.234 102.094 46.749 1.00 |
| 15.30     | 1 . . |     |                                                        |
| ATOM 3302 | CB    | CB  | . VAL VAL VAL A A 432 432 . 83.523 102.748 47.319 1.00 |
| 15.62     | 1 . . |     |                                                        |
| ATOM 3303 | CG1   | CG1 | . VAL VAL VAL A A 432 432 . 84.549 101.644 47.546 1.00 |
| 16.06     | 1 . . |     |                                                        |
| ATOM 3304 | CG2   | CG2 | . VAL VAL VAL A A 432 432 . 84.037 103.896 46.433 1.00 |
| 12.78     | 1 . . |     |                                                        |
| ATOM 3305 | C     | C   | . VAL VAL VAL A A 432 432 . 81.169 103.131 46.517 1.00 |
| 15.73     | 1 . . |     |                                                        |
| ATOM 3306 | O     | O   | . VAL VAL VAL A A 432 432 . 80.743 103.801 47.467 1.00 |
| 14.71     | 1 . . |     |                                                        |
| ATOM 3307 | N     | N   | . LEU LEU LEU A A 433 433 . 80.755 103.286 45.254 1.00 |
| 15.21     | 1 . . |     |                                                        |
| ATOM 3308 | CA    | CA  | . LEU LEU LEU A A 433 433 . 79.732 104.253 44.894 1.00 |
| 16.14     | 1 . . |     |                                                        |
| ATOM 3309 | CB    | CB  | . LEU LEU LEU A A 433 433 . 79.980 104.824 43.476 1.00 |
| 15.54     | 1 . . |     |                                                        |

|           |      |      |                   |         |           |         |        |      |
|-----------|------|------|-------------------|---------|-----------|---------|--------|------|
| ATOM 3310 | CG   | CG   | . LEU LEU LEU A A | 433 433 | . 81.338  | 105.446 | 43.136 | 1.00 |
| 14.40     | 1    | . .  |                   |         |           |         |        |      |
| ATOM 3311 | CD1  | CD1  | . LEU LEU LEU A A | 433 433 | . 81.455  | 105.794 | 41.660 | 1.00 |
| 12.70     | 1    | . .  |                   |         |           |         |        |      |
| ATOM 3312 | CD2  | CD2  | . LEU LEU LEU A A | 433 433 | . 81.630  | 106.694 | 43.964 | 1.00 |
| 13.86     | 1    | . .  |                   |         |           |         |        |      |
| ATOM 3313 | C    | C    | . LEU LEU LEU A A | 433 433 | . 78.317  | 103.626 | 44.967 | 1.00 |
| 16.15     | 1    | . .  |                   |         |           |         |        |      |
| ATOM 3314 | O    | O    | . LEU LEU LEU A A | 433 433 | . 78.110  | 102.441 | 44.625 | 1.00 |
| 18.55     | 1    | . .  |                   |         |           |         |        |      |
| ATOM 3315 | MG+2 | MG+2 | . MG2 MG2 MG2 A . | 600 600 | . 99.107  | 96.133  | 26.467 | 1.00 |
| 2.34      | 1    | . .  |                   |         |           |         |        |      |
| ATOM 3316 | MG+2 | MG+2 | . MG2 MG2 MG2 A . | 601 601 | . 99.993  | 93.975  | 23.430 | 1.00 |
| 2.63      | 1    | . .  |                   |         |           |         |        |      |
| ATOM 3317 | O4P  | O4P  | . 2PG 2PG 2PG A . | 602 602 | . 96.108  | 94.576  | 20.903 | 1.00 |
| 2.90      | 1    | . .  |                   |         |           |         |        |      |
| ATOM 3318 | P    | P    | . 2PG 2PG 2PG A . | 602 602 | . 97.574  | 94.869  | 21.211 | 1.00 |
| 2.00      | 1    | . .  |                   |         |           |         |        |      |
| ATOM 3319 | O2P  | O2P  | . 2PG 2PG 2PG A . | 602 602 | . 98.459  | 95.051  | 19.981 | 1.00 |
| 2.68      | 1    | . .  |                   |         |           |         |        |      |
| ATOM 3320 | O3P  | O3P  | . 2PG 2PG 2PG A . | 602 602 | . 98.317  | 93.935  | 22.163 | 1.00 |
| 2.09      | 1    | . .  |                   |         |           |         |        |      |
| ATOM 3321 | O1P  | O1P  | . 2PG 2PG 2PG A . | 602 602 | . 97.654  | 96.288  | 22.020 | 1.00 |
| 2.71      | 1    | . .  |                   |         |           |         |        |      |
| ATOM 3322 | C2   | C2   | . 2PG 2PG 2PG A . | 602 602 | . 96.987  | 96.177  | 23.300 | 1.00 |
| 5.74      | 1    | . .  |                   |         |           |         |        |      |
| ATOM 3323 | C1   | C1   | . 2PG 2PG 2PG A . | 602 602 | . 97.917  | 96.121  | 24.498 | 1.00 |
| 6.43      | 1    | . .  |                   |         |           |         |        |      |
| ATOM 3324 | O2   | O2   | . 2PG 2PG 2PG A . | 602 602 | . 97.404  | 96.494  | 25.597 | 1.00 |
| 4.60      | 1    | . .  |                   |         |           |         |        |      |
| ATOM 3325 | O1   | O1   | . 2PG 2PG 2PG A . | 602 602 | . 99.168  | 95.717  | 24.415 | 1.00 |
| 3.55      | 1    | . .  |                   |         |           |         |        |      |
| ATOM 3326 | C3   | C3   | . 2PG 2PG 2PG A . | 602 602 | . 95.748  | 97.119  | 23.355 | 1.00 |
| 8.89      | 1    | . .  |                   |         |           |         |        |      |
| ATOM 3327 | O3   | O3   | . 2PG 2PG 2PG A . | 602 602 | . 96.071  | 98.441  | 22.983 | 1.00 |
| 7.87      | 1    | . .  |                   |         |           |         |        |      |
| ATOM 3328 | O    | O    | . HOH HOH HOH A . | 603 603 | . 101.096 | 95.783  | 26.894 | 1.00 |
| 2.43      | 1    | . .  |                   |         |           |         |        |      |
| ATOM 3329 | O    | O    | . HOH HOH HOH A . | 604 604 | . 101.659 | 94.131  | 24.582 | 1.00 |
| 2.86      | 1    | . .  |                   |         |           |         |        |      |
| ATOM 3330 | O    | O    | . HOH HOH HOH A . | 605 605 | . 98.911  | 92.643  | 24.763 | 1.00 |
| 2.74      | 1    | . .  |                   |         |           |         |        |      |
| ATOM 3331 | O3   | O3   | . TRS TRS TRS A . | 606 606 | . 107.389 | 90.915  | 20.068 | 1.00 |
| 24.51     | 1    | . .  |                   |         |           |         |        |      |
| ATOM 3332 | C3   | C3   | . TRS TRS TRS A . | 606 606 | . 107.341 | 89.503  | 20.105 | 1.00 |
| 23.78     | 1    | . .  |                   |         |           |         |        |      |
| ATOM 3333 | C    | C    | . TRS TRS TRS A . | 606 606 | . 106.306 | 89.068  | 21.124 | 1.00 |
| 22.20     | 1    | . .  |                   |         |           |         |        |      |
| ATOM 3334 | N    | N    | . TRS TRS TRS A . | 606 606 | . 105.013 | 89.734  | 20.760 | 1.00 |
| 21.89     | 1    | . .  |                   |         |           |         |        |      |
| ATOM 3335 | C2   | C2   | . TRS TRS TRS A . | 606 606 | . 106.280 | 87.517  | 21.119 | 1.00 |
| 23.17     | 1    | . .  |                   |         |           |         |        |      |
| ATOM 3336 | O2   | O2   | . TRS TRS TRS A . | 606 606 | . 105.327 | 86.975  | 20.245 | 1.00 |
| 21.89     | 1    | . .  |                   |         |           |         |        |      |





|           |       |     |                       |          |         |        |      |
|-----------|-------|-----|-----------------------|----------|---------|--------|------|
| ATOM 3364 | CB    | CB  | . LYS LYS LYS B B 4 4 | . 59.824 | 107.071 | 19.764 | 1.00 |
| 9.35      | 1 . . |     |                       |          |         |        |      |
| ATOM 3365 | CG    | CG  | . LYS LYS LYS B B 4 4 | . 60.491 | 108.035 | 20.738 | 1.00 |
| 13.83     | 1 . . |     |                       |          |         |        |      |
| ATOM 3366 | CD    | CD  | . LYS LYS LYS B B 4 4 | . 60.979 | 107.317 | 22.003 | 1.00 |
| 17.98     | 1 . . |     |                       |          |         |        |      |
| ATOM 3367 | CE    | CE  | . LYS LYS LYS B B 4 4 | . 61.583 | 108.252 | 23.031 | 1.00 |
| 22.35     | 1 . . |     |                       |          |         |        |      |
| ATOM 3368 | NZ    | NZ  | . LYS LYS LYS B B 4 4 | . 63.092 | 108.281 | 23.004 | 1.00 |
| 27.13     | 1 . . |     |                       |          |         |        |      |
| ATOM 3369 | C     | C   | . LYS LYS LYS B B 4 4 | . 60.522 | 108.109 | 17.703 | 1.00 |
| 10.70     | 1 . . |     |                       |          |         |        |      |
| ATOM 3370 | O     | O   | . LYS LYS LYS B B 4 4 | . 61.025 | 107.195 | 17.074 | 1.00 |
| 11.15     | 1 . . |     |                       |          |         |        |      |
| ATOM 3371 | N     | N   | . ILE ILE ILE B B 5 5 | . 60.986 | 109.373 | 17.743 | 1.00 |
| 8.95      | 1 . . |     |                       |          |         |        |      |
| ATOM 3372 | CA    | CA  | . ILE ILE ILE B B 5 5 | . 62.281 | 109.724 | 17.160 | 1.00 |
| 7.67      | 1 . . |     |                       |          |         |        |      |
| ATOM 3373 | CB    | CB  | . ILE ILE ILE B B 5 5 | . 62.164 | 110.655 | 16.005 | 1.00 |
| 8.38      | 1 . . |     |                       |          |         |        |      |
| ATOM 3374 | CG1   | CG1 | . ILE ILE ILE B B 5 5 | . 61.605 | 109.883 | 14.804 | 1.00 |
| 6.03      | 1 . . |     |                       |          |         |        |      |
| ATOM 3375 | CD1   | CD1 | . ILE ILE ILE B B 5 5 | . 61.044 | 110.742 | 13.702 | 1.00 |
| 9.92      | 1 . . |     |                       |          |         |        |      |
| ATOM 3376 | CG2   | CG2 | . ILE ILE ILE B B 5 5 | . 63.527 | 111.136 | 15.681 | 1.00 |
| 8.10      | 1 . . |     |                       |          |         |        |      |
| ATOM 3377 | C     | C   | . ILE ILE ILE B B 5 5 | . 63.141 | 110.347 | 18.236 | 1.00 |
| 8.20      | 1 . . |     |                       |          |         |        |      |
| ATOM 3378 | O     | O   | . ILE ILE ILE B B 5 5 | . 62.685 | 111.184 | 19.001 | 1.00 |
| 11.44     | 1 . . |     |                       |          |         |        |      |
| ATOM 3379 | N     | N   | . TRP TRP TRP B B 6 6 | . 64.392 | 109.918 | 18.332 | 1.00 |
| 6.96      | 1 . . |     |                       |          |         |        |      |
| ATOM 3380 | CA    | CA  | . TRP TRP TRP B B 6 6 | . 65.233 | 110.479 | 19.374 | 1.00 |
| 5.98      | 1 . . |     |                       |          |         |        |      |
| ATOM 3381 | CB    | CB  | . TRP TRP TRP B B 6 6 | . 65.180 | 109.665 | 20.673 | 1.00 |
| 6.62      | 1 . . |     |                       |          |         |        |      |
| ATOM 3382 | CG    | CG  | . TRP TRP TRP B B 6 6 | . 66.136 | 110.204 | 21.676 | 1.00 |
| 8.31      | 1 . . |     |                       |          |         |        |      |
| ATOM 3383 | CD1   | CD1 | . TRP TRP TRP B B 6 6 | . 67.372 | 109.719 | 21.987 | 1.00 |
| 12.52     | 1 . . |     |                       |          |         |        |      |
| ATOM 3384 | NE1   | NE1 | . TRP TRP TRP B B 6 6 | . 67.966 | 110.539 | 22.914 | 1.00 |
| 11.91     | 1 . . |     |                       |          |         |        |      |
| ATOM 3385 | CE2   | CE2 | . TRP TRP TRP B B 6 6 | . 67.126 | 111.587 | 23.202 | 1.00 |
| 12.97     | 1 . . |     |                       |          |         |        |      |
| ATOM 3386 | CD2   | CD2 | . TRP TRP TRP B B 6 6 | . 65.956 | 111.399 | 22.453 | 1.00 |
| 12.36     | 1 . . |     |                       |          |         |        |      |
| ATOM 3387 | CE3   | CE3 | . TRP TRP TRP B B 6 6 | . 64.925 | 112.351 | 22.555 | 1.00 |
| 14.10     | 1 . . |     |                       |          |         |        |      |
| ATOM 3388 | CZ3   | CZ3 | . TRP TRP TRP B B 6 6 | . 65.072 | 113.439 | 23.408 | 1.00 |
| 15.70     | 1 . . |     |                       |          |         |        |      |
| ATOM 3389 | CH2   | CH2 | . TRP TRP TRP B B 6 6 | . 66.246 | 113.600 | 24.188 | 1.00 |
| 16.22     | 1 . . |     |                       |          |         |        |      |
| ATOM 3390 | CZ2   | CZ2 | . TRP TRP TRP B B 6 6 | . 67.286 | 112.682 | 24.104 | 1.00 |
| 16.36     | 1 . . |     |                       |          |         |        |      |

|           |     |       |                       |          |         |        |      |
|-----------|-----|-------|-----------------------|----------|---------|--------|------|
| ATOM 3391 | C   | C     | . TRP TRP TRP B B 6 6 | . 66.661 | 110.609 | 18.846 | 1.00 |
| 6.77      | 1   | . . . |                       |          |         |        |      |
| ATOM 3392 | O   | O     | . TRP TRP TRP B B 6 6 | . 67.302 | 109.584 | 18.426 | 1.00 |
| 7.90      | 1   | . . . |                       |          |         |        |      |
| ATOM 3393 | N   | N     | . ALA ALA ALA B B 7 7 | . 67.110 | 111.850 | 18.745 | 1.00 |
| 6.02      | 1   | . . . |                       |          |         |        |      |
| ATOM 3394 | CA  | CA    | . ALA ALA ALA B B 7 7 | . 68.459 | 112.097 | 18.291 | 1.00 |
| 4.78      | 1   | . . . |                       |          |         |        |      |
| ATOM 3395 | CB  | CB    | . ALA ALA ALA B B 7 7 | . 68.505 | 113.315 | 17.355 | 1.00 |
| 5.11      | 1   | . . . |                       |          |         |        |      |
| ATOM 3396 | C   | C     | . ALA ALA ALA B B 7 7 | . 69.423 | 112.333 | 19.437 | 1.00 |
| 4.54      | 1   | . . . |                       |          |         |        |      |
| ATOM 3397 | O   | O     | . ALA ALA ALA B B 7 7 | . 69.028 | 112.937 | 20.434 | 1.00 |
| 5.20      | 1   | . . . |                       |          |         |        |      |
| ATOM 3398 | N   | N     | . ARG ARG ARG B B 8 8 | . 70.714 | 112.092 | 19.183 | 1.00 |
| 5.12      | 1   | . . . |                       |          |         |        |      |
| ATOM 3399 | CA  | CA    | . ARG ARG ARG B B 8 8 | . 71.774 | 112.453 | 20.078 | 1.00 |
| 3.43      | 1   | . . . |                       |          |         |        |      |
| ATOM 3400 | CB  | CB    | . ARG ARG ARG B B 8 8 | . 72.087 | 111.234 | 21.018 | 1.00 |
| 3.01      | 1   | . . . |                       |          |         |        |      |
| ATOM 3401 | CG  | CG    | . ARG ARG ARG B B 8 8 | . 72.663 | 110.031 | 20.215 | 1.00 |
| 4.95      | 1   | . . . |                       |          |         |        |      |
| ATOM 3402 | CD  | CD    | . ARG ARG ARG B B 8 8 | . 73.042 | 108.824 | 21.132 | 1.00 |
| 4.63      | 1   | . . . |                       |          |         |        |      |
| ATOM 3403 | NE  | NE    | . ARG ARG ARG B B 8 8 | . 71.840 | 108.256 | 21.761 | 1.00 |
| 7.41      | 1   | . . . |                       |          |         |        |      |
| ATOM 3404 | CZ  | CZ    | . ARG ARG ARG B B 8 8 | . 71.022 | 107.422 | 21.114 | 1.00 |
| 6.91      | 1   | . . . |                       |          |         |        |      |
| ATOM 3405 | NH1 | NH1   | . ARG ARG ARG B B 8 8 | . 71.350 | 107.013 | 19.898 | 1.00 |
| 6.45      | 1   | . . . |                       |          |         |        |      |
| ATOM 3406 | NH2 | NH2   | . ARG ARG ARG B B 8 8 | . 69.899 | 106.972 | 21.672 | 1.00 |
| 11.73     | 1   | . . . |                       |          |         |        |      |
| ATOM 3407 | C   | C     | . ARG ARG ARG B B 8 8 | . 73.039 | 112.810 | 19.298 | 1.00 |
| 2.59      | 1   | . . . |                       |          |         |        |      |
| ATOM 3408 | O   | O     | . ARG ARG ARG B B 8 8 | . 73.155 | 112.519 | 18.080 | 1.00 |
| 3.92      | 1   | . . . |                       |          |         |        |      |
| ATOM 3409 | N   | N     | . GLU GLU GLU B B 9 9 | . 74.036 | 113.294 | 20.022 | 1.00 |
| 3.18      | 1   | . . . |                       |          |         |        |      |
| ATOM 3410 | CA  | CA    | . GLU GLU GLU B B 9 9 | . 75.400 | 113.630 | 19.586 | 1.00 |
| 3.54      | 1   | . . . |                       |          |         |        |      |
| ATOM 3411 | CB  | CB    | . GLU GLU GLU B B 9 9 | . 75.807 | 114.918 | 20.335 | 1.00 |
| 7.36      | 1   | . . . |                       |          |         |        |      |
| ATOM 3412 | CG  | CG    | . GLU GLU GLU B B 9 9 | . 77.065 | 115.593 | 19.918 | 1.00 |
| 9.18      | 1   | . . . |                       |          |         |        |      |
| ATOM 3413 | CD  | CD    | . GLU GLU GLU B B 9 9 | . 77.281 | 116.804 | 20.848 | 1.00 |
| 10.84     | 1   | . . . |                       |          |         |        |      |
| ATOM 3414 | OE1 | OE1   | . GLU GLU GLU B B 9 9 | . 77.288 | 117.935 | 20.346 | 1.00 |
| 7.20      | 1   | . . . |                       |          |         |        |      |
| ATOM 3415 | OE2 | OE2   | . GLU GLU GLU B B 9 9 | . 77.353 | 116.633 | 22.085 | 1.00 |
| 10.38     | 1   | . . . |                       |          |         |        |      |
| ATOM 3416 | C   | C     | . GLU GLU GLU B B 9 9 | . 76.313 | 112.396 | 19.835 | 1.00 |
| 5.03      | 1   | . . . |                       |          |         |        |      |
| ATOM 3417 | O   | O     | . GLU GLU GLU B B 9 9 | . 76.409 | 111.855 | 20.981 | 1.00 |
| 5.74      | 1   | . . . |                       |          |         |        |      |









|           |       |     |                           |        |         |        |      |
|-----------|-------|-----|---------------------------|--------|---------|--------|------|
| ATOM 3526 | CB    | CB  | . TYR TYR TYR B B 24 24 . | 60.724 | 103.490 | 18.122 | 1.00 |
| 11.26     | 1 . . |     |                           |        |         |        |      |
| ATOM 3527 | CG    | CG  | . TYR TYR TYR B B 24 24 . | 61.890 | 103.593 | 19.054 | 1.00 |
| 14.28     | 1 . . |     |                           |        |         |        |      |
| ATOM 3528 | CD1   | CD1 | . TYR TYR TYR B B 24 24 . | 62.523 | 104.820 | 19.272 | 1.00 |
| 13.57     | 1 . . |     |                           |        |         |        |      |
| ATOM 3529 | CE1   | CE1 | . TYR TYR TYR B B 24 24 . | 63.583 | 104.926 | 20.158 | 1.00 |
| 17.11     | 1 . . |     |                           |        |         |        |      |
| ATOM 3530 | CZ    | CZ  | . TYR TYR TYR B B 24 24 . | 64.001 | 103.810 | 20.839 | 1.00 |
| 17.78     | 1 . . |     |                           |        |         |        |      |
| ATOM 3531 | OH    | OH  | . TYR TYR TYR B B 24 24 . | 65.051 | 103.935 | 21.693 | 1.00 |
| 19.09     | 1 . . |     |                           |        |         |        |      |
| ATOM 3532 | CE2   | CE2 | . TYR TYR TYR B B 24 24 . | 63.411 | 102.586 | 20.629 | 1.00 |
| 17.44     | 1 . . |     |                           |        |         |        |      |
| ATOM 3533 | CD2   | CD2 | . TYR TYR TYR B B 24 24 . | 62.346 | 102.479 | 19.736 | 1.00 |
| 17.09     | 1 . . |     |                           |        |         |        |      |
| ATOM 3534 | C     | C   | . TYR TYR TYR B B 24 24 . | 59.824 | 103.226 | 15.845 | 1.00 |
| 11.72     | 1 . . |     |                           |        |         |        |      |
| ATOM 3535 | O     | O   | . TYR TYR TYR B B 24 24 . | 59.024 | 104.179 | 15.639 | 1.00 |
| 11.77     | 1 . . |     |                           |        |         |        |      |
| ATOM 3536 | N     | N   | . THR THR THR B B 25 25 . | 59.621 | 102.003 | 15.390 | 1.00 |
| 13.15     | 1 . . |     |                           |        |         |        |      |
| ATOM 3537 | CA    | CA  | . THR THR THR B B 25 25 . | 58.315 | 101.634 | 14.879 | 1.00 |
| 13.60     | 1 . . |     |                           |        |         |        |      |
| ATOM 3538 | CB    | CB  | . THR THR THR B B 25 25 . | 58.335 | 101.304 | 13.416 | 1.00 |
| 14.65     | 1 . . |     |                           |        |         |        |      |
| ATOM 3539 | OG1   | OG1 | . THR THR THR B B 25 25 . | 59.103 | 100.115 | 13.259 | 1.00 |
| 9.62      | 1 . . |     |                           |        |         |        |      |
| ATOM 3540 | CG2   | CG2 | . THR THR THR B B 25 25 . | 58.884 | 102.485 | 12.529 | 1.00 |
| 13.98     | 1 . . |     |                           |        |         |        |      |
| ATOM 3541 | C     | C   | . THR THR THR B B 25 25 . | 57.863 | 100.399 | 15.634 | 1.00 |
| 14.56     | 1 . . |     |                           |        |         |        |      |
| ATOM 3542 | O     | O   | . THR THR THR B B 25 25 . | 58.563 | 99.913  | 16.516 | 1.00 |
| 13.60     | 1 . . |     |                           |        |         |        |      |
| ATOM 3543 | N     | N   | . ALA ALA ALA B B 26 26 . | 56.713 | 99.873  | 15.243 | 1.00 |
| 15.07     | 1 . . |     |                           |        |         |        |      |
| ATOM 3544 | CA    | CA  | . ALA ALA ALA B B 26 26 . | 56.233 | 98.613  | 15.769 | 1.00 |
| 17.18     | 1 . . |     |                           |        |         |        |      |
| ATOM 3545 | CB    | CB  | . ALA ALA ALA B B 26 26 . | 54.854 | 98.271  | 15.217 | 1.00 |
| 17.17     | 1 . . |     |                           |        |         |        |      |
| ATOM 3546 | C     | C   | . ALA ALA ALA B B 26 26 . | 57.232 | 97.486  | 15.501 | 1.00 |
| 18.47     | 1 . . |     |                           |        |         |        |      |
| ATOM 3547 | O     | O   | . ALA ALA ALA B B 26 26 . | 57.296 | 96.531  | 16.269 | 1.00 |
| 18.49     | 1 . . |     |                           |        |         |        |      |
| ATOM 3548 | N     | N   | . LYS LYS LYS B B 27 27 . | 58.062 | 97.646  | 14.471 | 1.00 |
| 19.06     | 1 . . |     |                           |        |         |        |      |
| ATOM 3549 | CA    | CA  | . LYS LYS LYS B B 27 27 . | 59.073 | 96.649  | 14.087 | 1.00 |
| 19.42     | 1 . . |     |                           |        |         |        |      |
| ATOM 3550 | CB    | CB  | . LYS LYS LYS B B 27 27 . | 59.393 | 96.740  | 12.606 | 1.00 |
| 20.57     | 1 . . |     |                           |        |         |        |      |
| ATOM 3551 | CG    | CG  | . LYS LYS LYS B B 27 27 . | 58.246 | 96.457  | 11.678 | 1.00 |
| 21.72     | 1 . . |     |                           |        |         |        |      |
| ATOM 3552 | CD    | CD  | . LYS LYS LYS B B 27 27 . | 58.183 | 94.971  | 11.376 | 1.00 |
| 24.03     | 1 . . |     |                           |        |         |        |      |







|           |       |    |                           |        |         |        |      |
|-----------|-------|----|---------------------------|--------|---------|--------|------|
| ATOM 3607 | O     | O  | . VAL VAL VAL B B 34 34 . | 77.666 | 111.932 | 10.439 | 1.00 |
| 3.45      | 1 . . |    |                           |        |         |        |      |
| ATOM 3608 | N     | N  | . PRO PRO PRO B B 35 35 . | 77.588 | 111.568 | 8.246  | 1.00 |
| 2.00      | 1 . . |    |                           |        |         |        |      |
| ATOM 3609 | CA    | CA | . PRO PRO PRO B B 35 35 . | 79.027 | 111.799 | 8.092  | 1.00 |
| 2.23      | 1 . . |    |                           |        |         |        |      |
| ATOM 3610 | CB    | CB | . PRO PRO PRO B B 35 35 . | 79.361 | 111.057 | 6.800  | 1.00 |
| 3.44      | 1 . . |    |                           |        |         |        |      |
| ATOM 3611 | CG    | CG | . PRO PRO PRO B B 35 35 . | 78.124 | 111.199 | 5.993  | 1.00 |
| 2.11      | 1 . . |    |                           |        |         |        |      |
| ATOM 3612 | CD    | CD | . PRO PRO PRO B B 35 35 . | 76.912 | 111.260 | 6.975  | 1.00 |
| 2.43      | 1 . . |    |                           |        |         |        |      |
| ATOM 3613 | C     | C  | . PRO PRO PRO B B 35 35 . | 79.315 | 113.332 | 7.943  | 1.00 |
| 2.15      | 1 . . |    |                           |        |         |        |      |
| ATOM 3614 | O     | O  | . PRO PRO PRO B B 35 35 . | 78.379 | 114.136 | 7.897  | 1.00 |
| 3.59      | 1 . . |    |                           |        |         |        |      |
| ATOM 3615 | N     | N  | . SER SER SER B B 36 36 . | 80.582 | 113.732 | 7.856  | 1.00 |
| 2.94      | 1 . . |    |                           |        |         |        |      |
| ATOM 3616 | CA    | CA | . SER SER SER B B 36 36 . | 80.946 | 115.127 | 7.740  | 1.00 |
| 2.55      | 1 . . |    |                           |        |         |        |      |
| ATOM 3617 | CB    | CB | . SER SER SER B B 36 36 . | 81.176 | 115.733 | 9.139  | 1.00 |
| 3.21      | 1 . . |    |                           |        |         |        |      |
| ATOM 3618 | OG    | OG | . SER SER SER B B 36 36 . | 81.615 | 117.029 | 9.027  | 1.00 |
| 5.51      | 1 . . |    |                           |        |         |        |      |
| ATOM 3619 | C     | C  | . SER SER SER B B 36 36 . | 82.208 | 115.242 | 6.934  | 1.00 |
| 2.96      | 1 . . |    |                           |        |         |        |      |
| ATOM 3620 | O     | O  | . SER SER SER B B 36 36 . | 83.225 | 114.562 | 7.246  | 1.00 |
| 3.76      | 1 . . |    |                           |        |         |        |      |
| ATOM 3621 | N     | N  | . GLY GLY GLY B B 37 37 . | 82.202 | 116.122 | 5.922  | 1.00 |
| 2.83      | 1 . . |    |                           |        |         |        |      |
| ATOM 3622 | CA    | CA | . GLY GLY GLY B B 37 37 . | 83.383 | 116.355 | 5.082  | 1.00 |
| 3.19      | 1 . . |    |                           |        |         |        |      |
| ATOM 3623 | C     | C  | . GLY GLY GLY B B 37 37 . | 84.352 | 117.365 | 5.639  | 1.00 |
| 2.02      | 1 . . |    |                           |        |         |        |      |
| ATOM 3624 | O     | O  | . GLY GLY GLY B B 37 37 . | 83.986 | 118.121 | 6.581  | 1.00 |
| 3.71      | 1 . . |    |                           |        |         |        |      |
| ATOM 3625 | N     | N  | . ALA ALA ALA B B 38 38 . | 85.602 | 117.321 | 5.106  | 1.00 |
| 2.63      | 1 . . |    |                           |        |         |        |      |
| ATOM 3626 | CA    | CA | . ALA ALA ALA B B 38 38 . | 86.613 | 118.302 | 5.328  | 1.00 |
| 2.28      | 1 . . |    |                           |        |         |        |      |
| ATOM 3627 | CB    | CB | . ALA ALA ALA B B 38 38 . | 87.891 | 117.729 | 5.750  | 1.00 |
| 2.34      | 1 . . |    |                           |        |         |        |      |
| ATOM 3628 | C     | C  | . ALA ALA ALA B B 38 38 . | 86.789 | 119.201 | 4.109  | 1.00 |
| 3.28      | 1 . . |    |                           |        |         |        |      |
| ATOM 3629 | O     | O  | . ALA ALA ALA B B 38 38 . | 86.653 | 120.462 | 4.194  | 1.00 |
| 5.89      | 1 . . |    |                           |        |         |        |      |
| ATOM 3630 | N     | N  | . SER SER SER B B 39 39 . | 87.028 | 118.565 | 2.970  | 1.00 |
| 3.16      | 1 . . |    |                           |        |         |        |      |
| ATOM 3631 | CA    | CA | . SER SER SER B B 39 39 . | 87.084 | 119.379 | 1.787  | 1.00 |
| 2.51      | 1 . . |    |                           |        |         |        |      |
| ATOM 3632 | CB    | CB | . SER SER SER B B 39 39 . | 87.973 | 118.782 | 0.726  | 1.00 |
| 3.28      | 1 . . |    |                           |        |         |        |      |
| ATOM 3633 | OG    | OG | . SER SER SER B B 39 39 . | 87.571 | 117.459 | 0.410  | 1.00 |
| 3.78      | 1 . . |    |                           |        |         |        |      |



|           |       |     |                           |        |         |        |      |
|-----------|-------|-----|---------------------------|--------|---------|--------|------|
| ATOM 3661 | CZ    | CZ  | . TYR TYR TYR B B 43 43 . | 78.593 | 127.702 | -6.508 | 1.00 |
| 5.23      | 1 . . |     |                           |        |         |        |      |
| ATOM 3662 | OH    | OH  | . TYR TYR TYR B B 43 43 . | 79.017 | 128.822 | -7.183 | 1.00 |
| 6.51      | 1 . . |     |                           |        |         |        |      |
| ATOM 3663 | CE2   | CE2 | . TYR TYR TYR B B 43 43 . | 77.507 | 127.812 | -5.623 | 1.00 |
| 4.91      | 1 . . |     |                           |        |         |        |      |
| ATOM 3664 | CD2   | CD2 | . TYR TYR TYR B B 43 43 . | 77.043 | 126.713 | -4.909 | 1.00 |
| 4.59      | 1 . . |     |                           |        |         |        |      |
| ATOM 3665 | C     | C   | . TYR TYR TYR B B 43 43 . | 76.710 | 123.355 | -1.957 | 1.00 |
| 2.51      | 1 . . |     |                           |        |         |        |      |
| ATOM 3666 | O     | O   | . TYR TYR TYR B B 43 43 . | 75.519 | 123.082 | -2.211 | 1.00 |
| 3.45      | 1 . . |     |                           |        |         |        |      |
| ATOM 3667 | N     | N   | . GLU GLU GLU B B 44 44 . | 77.409 | 122.717 | -1.021 | 1.00 |
| 3.84      | 1 . . |     |                           |        |         |        |      |
| ATOM 3668 | CA    | CA  | . GLU GLU GLU B B 44 44 . | 76.799 | 121.614 | -0.214 | 1.00 |
| 3.13      | 1 . . |     |                           |        |         |        |      |
| ATOM 3669 | CB    | CB  | . GLU GLU GLU B B 44 44 . | 77.864 | 120.931 | 0.672  | 1.00 |
| 3.43      | 1 . . |     |                           |        |         |        |      |
| ATOM 3670 | CG    | CG  | . GLU GLU GLU B B 44 44 . | 78.876 | 120.169 | -0.162 | 1.00 |
| 3.75      | 1 . . |     |                           |        |         |        |      |
| ATOM 3671 | CD    | CD  | . GLU GLU GLU B B 44 44 . | 79.819 | 119.265 | 0.630  | 1.00 |
| 3.83      | 1 . . |     |                           |        |         |        |      |
| ATOM 3672 | OE1   | OE1 | . GLU GLU GLU B B 44 44 . | 79.498 | 118.881 | 1.789  | 1.00 |
| 2.64      | 1 . . |     |                           |        |         |        |      |
| ATOM 3673 | OE2   | OE2 | . GLU GLU GLU B B 44 44 . | 80.924 | 118.902 | 0.116  | 1.00 |
| 5.31      | 1 . . |     |                           |        |         |        |      |
| ATOM 3674 | C     | C   | . GLU GLU GLU B B 44 44 . | 75.716 | 122.154 | 0.681  | 1.00 |
| 2.45      | 1 . . |     |                           |        |         |        |      |
| ATOM 3675 | O     | O   | . GLU GLU GLU B B 44 44 . | 75.808 | 123.325 | 1.112  | 1.00 |
| 3.84      | 1 . . |     |                           |        |         |        |      |
| ATOM 3676 | N     | N   | . ALA ALA ALA B B 45 45 . | 74.677 | 121.395 | 0.931  | 1.00 |
| 3.91      | 1 . . |     |                           |        |         |        |      |
| ATOM 3677 | CA    | CA  | . ALA ALA ALA B B 45 45 . | 73.723 | 121.814 | 1.893  | 1.00 |
| 3.33      | 1 . . |     |                           |        |         |        |      |
| ATOM 3678 | CB    | CB  | . ALA ALA ALA B B 45 45 . | 72.707 | 120.734 | 2.040  | 1.00 |
| 4.05      | 1 . . |     |                           |        |         |        |      |
| ATOM 3679 | C     | C   | . ALA ALA ALA B B 45 45 . | 74.334 | 122.067 | 3.259  | 1.00 |
| 4.19      | 1 . . |     |                           |        |         |        |      |
| ATOM 3680 | O     | O   | . ALA ALA ALA B B 45 45 . | 75.407 | 121.559 | 3.549  | 1.00 |
| 4.87      | 1 . . |     |                           |        |         |        |      |
| ATOM 3681 | N     | N   | . LEU LEU LEU B B 46 46 . | 73.653 | 122.869 | 4.090  | 1.00 |
| 4.51      | 1 . . |     |                           |        |         |        |      |
| ATOM 3682 | CA    | CA  | . LEU LEU LEU B B 46 46 . | 74.361 | 123.330 | 5.265  | 1.00 |
| 3.42      | 1 . . |     |                           |        |         |        |      |
| ATOM 3683 | CB    | CB  | . LEU LEU LEU B B 46 46 . | 73.652 | 124.554 | 5.871  | 1.00 |
| 6.54      | 1 . . |     |                           |        |         |        |      |
| ATOM 3684 | CG    | CG  | . LEU LEU LEU B B 46 46 . | 74.229 | 125.005 | 7.236  | 1.00 |
| 10.94     | 1 . . |     |                           |        |         |        |      |
| ATOM 3685 | CD1   | CD1 | . LEU LEU LEU B B 46 46 . | 75.650 | 125.479 | 6.955  | 1.00 |
| 14.81     | 1 . . |     |                           |        |         |        |      |
| ATOM 3686 | CD2   | CD2 | . LEU LEU LEU B B 46 46 . | 73.401 | 126.062 | 7.924  | 1.00 |
| 16.98     | 1 . . |     |                           |        |         |        |      |
| ATOM 3687 | C     | C   | . LEU LEU LEU B B 46 46 . | 74.496 | 122.301 | 6.320  | 1.00 |
| 3.64      | 1 . . |     |                           |        |         |        |      |

|           |       |     |                           |        |         |        |      |
|-----------|-------|-----|---------------------------|--------|---------|--------|------|
| ATOM 3688 | O     | O   | . LEU LEU LEU B B 46 46 . | 73.507 | 121.775 | 6.742  | 1.00 |
| 6.21      | 1 . . |     |                           |        |         |        |      |
| ATOM 3689 | N     | N   | . GLU GLU GLU B B 47 47 . | 75.702 | 122.204 | 6.853  | 1.00 |
| 4.41      | 1 . . |     |                           |        |         |        |      |
| ATOM 3690 | CA    | CA  | . GLU GLU GLU B B 47 47 . | 75.956 | 121.328 | 8.019  | 1.00 |
| 4.33      | 1 . . |     |                           |        |         |        |      |
| ATOM 3691 | CB    | CB  | . GLU GLU GLU B B 47 47 . | 77.365 | 120.776 | 7.858  | 1.00 |
| 3.29      | 1 . . |     |                           |        |         |        |      |
| ATOM 3692 | CG    | CG  | . GLU GLU GLU B B 47 47 . | 77.926 | 120.103 | 9.111  | 1.00 |
| 3.55      | 1 . . |     |                           |        |         |        |      |
| ATOM 3693 | CD    | CD  | . GLU GLU GLU B B 47 47 . | 79.348 | 119.562 | 8.918  | 1.00 |
| 3.18      | 1 . . |     |                           |        |         |        |      |
| ATOM 3694 | OE1   | OE1 | . GLU GLU GLU B B 47 47 . | 79.430 | 118.405 | 8.369  | 1.00 |
| 8.70      | 1 . . |     |                           |        |         |        |      |
| ATOM 3695 | OE2   | OE2 | . GLU GLU GLU B B 47 47 . | 80.360 | 120.153 | 9.335  | 1.00 |
| 6.85      | 1 . . |     |                           |        |         |        |      |
| ATOM 3696 | C     | C   | . GLU GLU GLU B B 47 47 . | 75.862 | 122.254 | 9.198  | 1.00 |
| 6.17      | 1 . . |     |                           |        |         |        |      |
| ATOM 3697 | O     | O   | . GLU GLU GLU B B 47 47 . | 76.703 | 123.094 | 9.323  | 1.00 |
| 7.10      | 1 . . |     |                           |        |         |        |      |
| ATOM 3698 | N     | N   | . LEU LEU LEU B B 48 48 . | 74.880 | 122.059 | 10.090 | 1.00 |
| 4.44      | 1 . . |     |                           |        |         |        |      |
| ATOM 3699 | CA    | CA  | . LEU LEU LEU B B 48 48 . | 74.639 | 123.034 | 11.187 | 1.00 |
| 3.34      | 1 . . |     |                           |        |         |        |      |
| ATOM 3700 | CB    | CB  | . LEU LEU LEU B B 48 48 . | 73.163 | 123.049 | 11.620 | 1.00 |
| 4.39      | 1 . . |     |                           |        |         |        |      |
| ATOM 3701 | CG    | CG  | . LEU LEU LEU B B 48 48 . | 72.853 | 123.991 | 12.793 | 1.00 |
| 4.52      | 1 . . |     |                           |        |         |        |      |
| ATOM 3702 | CD1   | CD1 | . LEU LEU LEU B B 48 48 . | 73.221 | 125.446 | 12.329 | 1.00 |
| 4.84      | 1 . . |     |                           |        |         |        |      |
| ATOM 3703 | CD2   | CD2 | . LEU LEU LEU B B 48 48 . | 71.393 | 123.936 | 13.121 | 1.00 |
| 6.73      | 1 . . |     |                           |        |         |        |      |
| ATOM 3704 | C     | C   | . LEU LEU LEU B B 48 48 . | 75.516 | 122.636 | 12.384 | 1.00 |
| 3.47      | 1 . . |     |                           |        |         |        |      |
| ATOM 3705 | O     | O   | . LEU LEU LEU B B 48 48 . | 75.341 | 121.515 | 12.892 | 1.00 |
| 3.37      | 1 . . |     |                           |        |         |        |      |
| ATOM 3706 | N     | N   | . ARG ARG ARG B B 49 49 . | 76.463 | 123.515 | 12.748 | 1.00 |
| 5.47      | 1 . . |     |                           |        |         |        |      |
| ATOM 3707 | CA    | CA  | . ARG ARG ARG B B 49 49 . | 77.296 | 123.364 | 13.910 | 1.00 |
| 7.14      | 1 . . |     |                           |        |         |        |      |
| ATOM 3708 | CB    | CB  | . ARG ARG ARG B B 49 49 . | 78.769 | 123.575 | 13.551 | 1.00 |
| 8.77      | 1 . . |     |                           |        |         |        |      |
| ATOM 3709 | CG    | CG  | . ARG ARG ARG B B 49 49 . | 79.344 | 122.552 | 12.566 | 1.00 |
| 11.83     | 1 . . |     |                           |        |         |        |      |
| ATOM 3710 | CD    | CD  | . ARG ARG ARG B B 49 49 . | 79.850 | 121.322 | 13.250 | 1.00 |
| 9.86      | 1 . . |     |                           |        |         |        |      |
| ATOM 3711 | NE    | NE  | . ARG ARG ARG B B 49 49 . | 80.361 | 120.304 | 12.335 | 1.00 |
| 9.96      | 1 . . |     |                           |        |         |        |      |
| ATOM 3712 | CZ    | CZ  | . ARG ARG ARG B B 49 49 . | 80.594 | 119.031 | 12.668 | 1.00 |
| 6.77      | 1 . . |     |                           |        |         |        |      |
| ATOM 3713 | NH1   | NH1 | . ARG ARG ARG B B 49 49 . | 80.467 | 118.623 | 13.932 | 1.00 |
| 5.76      | 1 . . |     |                           |        |         |        |      |
| ATOM 3714 | NH2   | NH2 | . ARG ARG ARG B B 49 49 . | 80.985 | 118.158 | 11.763 | 1.00 |
| 6.45      | 1 . . |     |                           |        |         |        |      |

|           |       |     |                           |        |         |        |      |
|-----------|-------|-----|---------------------------|--------|---------|--------|------|
| ATOM 3715 | C     | C   | . ARG ARG ARG B B 49 49 . | 76.887 | 124.430 | 14.930 | 1.00 |
| 6.51      | 1 . . |     |                           |        |         |        |      |
| ATOM 3716 | O     | O   | . ARG ARG ARG B B 49 49 . | 76.342 | 125.513 | 14.573 | 1.00 |
| 7.91      | 1 . . |     |                           |        |         |        |      |
| ATOM 3717 | N     | N   | . ASP ASP ASP B B 50 50 . | 77.176 | 124.155 | 16.197 | 1.00 |
| 4.93      | 1 . . |     |                           |        |         |        |      |
| ATOM 3718 | CA    | CA  | . ASP ASP ASP B B 50 50 . | 76.749 | 125.082 | 17.262 | 1.00 |
| 6.95      | 1 . . |     |                           |        |         |        |      |
| ATOM 3719 | CB    | CB  | . ASP ASP ASP B B 50 50 . | 76.836 | 124.362 | 18.595 | 1.00 |
| 5.11      | 1 . . |     |                           |        |         |        |      |
| ATOM 3720 | CG    | CG  | . ASP ASP ASP B B 50 50 . | 75.896 | 123.183 | 18.718 | 1.00 |
| 6.14      | 1 . . |     |                           |        |         |        |      |
| ATOM 3721 | OD1   | OD1 | . ASP ASP ASP B B 50 50 . | 74.906 | 122.963 | 17.924 | 1.00 |
| 4.35      | 1 . . |     |                           |        |         |        |      |
| ATOM 3722 | OD2   | OD2 | . ASP ASP ASP B B 50 50 . | 76.168 | 122.366 | 19.627 | 1.00 |
| 5.22      | 1 . . |     |                           |        |         |        |      |
| ATOM 3723 | C     | C   | . ASP ASP ASP B B 50 50 . | 77.551 | 126.353 | 17.380 | 1.00 |
| 8.18      | 1 . . |     |                           |        |         |        |      |
| ATOM 3724 | O     | O   | . ASP ASP ASP B B 50 50 . | 76.980 | 127.392 | 17.832 | 1.00 |
| 9.65      | 1 . . |     |                           |        |         |        |      |
| ATOM 3725 | N     | N   | . GLY GLY GLY B B 51 51 . | 78.843 | 126.229 | 17.102 | 1.00 |
| 7.80      | 1 . . |     |                           |        |         |        |      |
| ATOM 3726 | CA    | CA  | . GLY GLY GLY B B 51 51 . | 79.839 | 127.328 | 17.141 | 1.00 |
| 9.83      | 1 . . |     |                           |        |         |        |      |
| ATOM 3727 | C     | C   | . GLY GLY GLY B B 51 51 . | 80.077 | 127.845 | 18.551 | 1.00 |
| 12.20     | 1 . . |     |                           |        |         |        |      |
| ATOM 3728 | O     | O   | . GLY GLY GLY B B 51 51 . | 80.369 | 129.015 | 18.757 | 1.00 |
| 12.17     | 1 . . |     |                           |        |         |        |      |
| ATOM 3729 | N     | N   | . ASP ASP ASP B B 52 52 . | 79.948 | 126.984 | 19.550 | 1.00 |
| 11.64     | 1 . . |     |                           |        |         |        |      |
| ATOM 3730 | CA    | CA  | . ASP ASP ASP B B 52 52 . | 80.238 | 127.374 | 20.893 | 1.00 |
| 12.70     | 1 . . |     |                           |        |         |        |      |
| ATOM 3731 | CB    | CB  | . ASP ASP ASP B B 52 52 . | 79.356 | 126.602 | 21.864 | 1.00 |
| 13.01     | 1 . . |     |                           |        |         |        |      |
| ATOM 3732 | CG    | CG  | . ASP ASP ASP B B 52 52 . | 79.769 | 126.784 | 23.312 | 1.00 |
| 13.06     | 1 . . |     |                           |        |         |        |      |
| ATOM 3733 | OD1   | OD1 | . ASP ASP ASP B B 52 52 . | 80.786 | 127.455 | 23.512 | 1.00 |
| 11.45     | 1 . . |     |                           |        |         |        |      |
| ATOM 3734 | OD2   | OD2 | . ASP ASP ASP B B 52 52 . | 79.129 | 126.187 | 24.193 | 1.00 |
| 10.77     | 1 . . |     |                           |        |         |        |      |
| ATOM 3735 | C     | C   | . ASP ASP ASP B B 52 52 . | 81.727 | 127.106 | 21.013 | 1.00 |
| 13.41     | 1 . . |     |                           |        |         |        |      |
| ATOM 3736 | O     | O   | . ASP ASP ASP B B 52 52 . | 82.194 | 125.937 | 21.088 | 1.00 |
| 14.12     | 1 . . |     |                           |        |         |        |      |
| ATOM 3737 | N     | N   | . LYS LYS LYS B B 53 53 . | 82.493 | 128.192 | 21.005 | 1.00 |
| 15.33     | 1 . . |     |                           |        |         |        |      |
| ATOM 3738 | CA    | CA  | . LYS LYS LYS B B 53 53 . | 83.934 | 128.099 | 20.881 | 1.00 |
| 16.69     | 1 . . |     |                           |        |         |        |      |
| ATOM 3739 | CB    | CB  | . LYS LYS LYS B B 53 53 . | 84.538 | 129.510 | 20.947 | 1.00 |
| 17.29     | 1 . . |     |                           |        |         |        |      |
| ATOM 3740 | CG    | CG  | . LYS LYS LYS B B 53 53 . | 84.153 | 130.468 | 19.798 | 1.00 |
| 20.71     | 1 . . |     |                           |        |         |        |      |
| ATOM 3741 | CD    | CD  | . LYS LYS LYS B B 53 53 . | 85.367 | 130.784 | 18.936 | 1.00 |
| 24.48     | 1 . . |     |                           |        |         |        |      |

|           |       |     |                           |        |         |        |      |
|-----------|-------|-----|---------------------------|--------|---------|--------|------|
| ATOM 3742 | CE    | CE  | . LYS LYS LYS B B 53 53 . | 84.961 | 131.450 | 17.609 | 1.00 |
| 27.75     | 1 . . |     |                           |        |         |        |      |
| ATOM 3743 | NZ    | NZ  | . LYS LYS LYS B B 53 53 . | 85.146 | 132.921 | 17.582 | 1.00 |
| 29.74     | 1 . . |     |                           |        |         |        |      |
| ATOM 3744 | C     | C   | . LYS LYS LYS B B 53 53 . | 84.541 | 127.221 | 21.971 | 1.00 |
| 16.01     | 1 . . |     |                           |        |         |        |      |
| ATOM 3745 | O     | O   | . LYS LYS LYS B B 53 53 . | 85.613 | 126.650 | 21.767 | 1.00 |
| 15.93     | 1 . . |     |                           |        |         |        |      |
| ATOM 3746 | N     | N   | . GLN GLN GLN B B 54 54 . | 83.841 | 127.116 | 23.104 | 1.00 |
| 16.01     | 1 . . |     |                           |        |         |        |      |
| ATOM 3747 | CA    | CA  | . GLN GLN GLN B B 54 54 . | 84.375 | 126.493 | 24.316 | 1.00 |
| 15.75     | 1 . . |     |                           |        |         |        |      |
| ATOM 3748 | CB    | CB  | . GLN GLN GLN B B 54 54 . | 83.731 | 127.140 | 25.533 | 1.00 |
| 17.31     | 1 . . |     |                           |        |         |        |      |
| ATOM 3749 | CG    | CG  | . GLN GLN GLN B B 54 54 . | 83.857 | 128.658 | 25.668 | 1.00 |
| 22.26     | 1 . . |     |                           |        |         |        |      |
| ATOM 3750 | CD    | CD  | . GLN GLN GLN B B 54 54 . | 85.240 | 129.167 | 25.347 | 1.00 |
| 25.97     | 1 . . |     |                           |        |         |        |      |
| ATOM 3751 | OE1   | OE1 | . GLN GLN GLN B B 54 54 . | 86.252 | 128.619 | 25.806 | 1.00 |
| 27.97     | 1 . . |     |                           |        |         |        |      |
| ATOM 3752 | NE2   | NE2 | . GLN GLN GLN B B 54 54 . | 85.295 | 130.232 | 24.536 | 1.00 |
| 28.25     | 1 . . |     |                           |        |         |        |      |
| ATOM 3753 | C     | C   | . GLN GLN GLN B B 54 54 . | 84.044 | 124.994 | 24.406 | 1.00 |
| 14.58     | 1 . . |     |                           |        |         |        |      |
| ATOM 3754 | O     | O   | . GLN GLN GLN B B 54 54 . | 84.566 | 124.265 | 25.246 | 1.00 |
| 14.92     | 1 . . |     |                           |        |         |        |      |
| ATOM 3755 | N     | N   | . ARG ARG ARG B B 55 55 . | 83.167 | 124.553 | 23.510 | 1.00 |
| 12.35     | 1 . . |     |                           |        |         |        |      |
| ATOM 3756 | CA    | CA  | . ARG ARG ARG B B 55 55 . | 82.642 | 123.181 | 23.549 | 1.00 |
| 8.99      | 1 . . |     |                           |        |         |        |      |
| ATOM 3757 | CB    | CB  | . ARG ARG ARG B B 55 55 . | 81.143 | 123.169 | 23.748 | 1.00 |
| 9.25      | 1 . . |     |                           |        |         |        |      |
| ATOM 3758 | CG    | CG  | . ARG ARG ARG B B 55 55 . | 80.662 | 121.822 | 24.143 | 1.00 |
| 10.22     | 1 . . |     |                           |        |         |        |      |
| ATOM 3759 | CD    | CD  | . ARG ARG ARG B B 55 55 . | 79.174 | 121.769 | 24.526 | 1.00 |
| 9.26      | 1 . . |     |                           |        |         |        |      |
| ATOM 3760 | NE    | NE  | . ARG ARG ARG B B 55 55 . | 78.822 | 120.342 | 24.655 | 1.00 |
| 8.17      | 1 . . |     |                           |        |         |        |      |
| ATOM 3761 | CZ    | CZ  | . ARG ARG ARG B B 55 55 . | 78.484 | 119.506 | 23.642 | 1.00 |
| 7.73      | 1 . . |     |                           |        |         |        |      |
| ATOM 3762 | NH1   | NH1 | . ARG ARG ARG B B 55 55 . | 78.320 | 119.963 | 22.411 | 1.00 |
| 6.31      | 1 . . |     |                           |        |         |        |      |
| ATOM 3763 | NH2   | NH2 | . ARG ARG ARG B B 55 55 . | 78.237 | 118.217 | 23.890 | 1.00 |
| 9.09      | 1 . . |     |                           |        |         |        |      |
| ATOM 3764 | C     | C   | . ARG ARG ARG B B 55 55 . | 82.937 | 122.431 | 22.263 | 1.00 |
| 6.28      | 1 . . |     |                           |        |         |        |      |
| ATOM 3765 | O     | O   | . ARG ARG ARG B B 55 55 . | 82.316 | 122.730 | 21.217 | 1.00 |
| 7.69      | 1 . . |     |                           |        |         |        |      |
| ATOM 3766 | N     | N   | . TYR TYR TYR B B 56 56 . | 83.853 | 121.448 | 22.338 | 1.00 |
| 6.29      | 1 . . |     |                           |        |         |        |      |
| ATOM 3767 | CA    | CA  | . TYR TYR TYR B B 56 56 . | 84.241 | 120.732 | 21.149 | 1.00 |
| 5.76      | 1 . . |     |                           |        |         |        |      |
| ATOM 3768 | CB    | CB  | . TYR TYR TYR B B 56 56 . | 83.031 | 119.975 | 20.615 | 1.00 |
| 3.82      | 1 . . |     |                           |        |         |        |      |



|           |       |     |                         |          |         |        |      |
|-----------|-------|-----|-------------------------|----------|---------|--------|------|
| ATOM 3769 | CG    | CG  | . TYR TYR TYR B B 56 56 | . 82.825 | 118.632 | 21.302 | 1.00 |
| 3.43      | 1 . . |     |                         |          |         |        |      |
| ATOM 3770 | CD1   | CD1 | . TYR TYR TYR B B 56 56 | . 81.689 | 118.380 | 22.057 | 1.00 |
| 3.00      | 1 . . |     |                         |          |         |        |      |
| ATOM 3771 | CE1   | CE1 | . TYR TYR TYR B B 56 56 | . 81.460 | 117.095 | 22.672 | 1.00 |
| 4.64      | 1 . . |     |                         |          |         |        |      |
| ATOM 3772 | CZ    | CZ  | . TYR TYR TYR B B 56 56 | . 82.427 | 116.084 | 22.538 | 1.00 |
| 2.61      | 1 . . |     |                         |          |         |        |      |
| ATOM 3773 | OH    | OH  | . TYR TYR TYR B B 56 56 | . 82.159 | 114.837 | 23.116 | 1.00 |
| 6.28      | 1 . . |     |                         |          |         |        |      |
| ATOM 3774 | CE2   | CE2 | . TYR TYR TYR B B 56 56 | . 83.553 | 116.280 | 21.738 | 1.00 |
| 3.40      | 1 . . |     |                         |          |         |        |      |
| ATOM 3775 | CD2   | CD2 | . TYR TYR TYR B B 56 56 | . 83.782 | 117.569 | 21.135 | 1.00 |
| 3.10      | 1 . . |     |                         |          |         |        |      |
| ATOM 3776 | C     | C   | . TYR TYR TYR B B 56 56 | . 84.802 | 121.632 | 20.068 | 1.00 |
| 6.89      | 1 . . |     |                         |          |         |        |      |
| ATOM 3777 | O     | O   | . TYR TYR TYR B B 56 56 | . 84.551 | 121.398 | 18.861 | 1.00 |
| 7.07      | 1 . . |     |                         |          |         |        |      |
| ATOM 3778 | N     | N   | . LEU LEU LEU B B 57 57 | . 85.520 | 122.681 | 20.491 | 1.00 |
| 8.56      | 1 . . |     |                         |          |         |        |      |
| ATOM 3779 | CA    | CA  | . LEU LEU LEU B B 57 57 | . 86.115 | 123.639 | 19.541 | 1.00 |
| 8.66      | 1 . . |     |                         |          |         |        |      |
| ATOM 3780 | CB    | CB  | . LEU LEU LEU B B 57 57 | . 87.346 | 123.040 | 18.821 | 1.00 |
| 10.00     | 1 . . |     |                         |          |         |        |      |
| ATOM 3781 | CG    | CG  | . LEU LEU LEU B B 57 57 | . 88.591 | 122.696 | 19.682 | 1.00 |
| 12.26     | 1 . . |     |                         |          |         |        |      |
| ATOM 3782 | CD1   | CD1 | . LEU LEU LEU B B 57 57 | . 88.406 | 121.396 | 20.466 | 1.00 |
| 13.08     | 1 . . |     |                         |          |         |        |      |
| ATOM 3783 | CD2   | CD2 | . LEU LEU LEU B B 57 57 | . 89.811 | 122.484 | 18.825 | 1.00 |
| 13.10     | 1 . . |     |                         |          |         |        |      |
| ATOM 3784 | C     | C   | . LEU LEU LEU B B 57 57 | . 85.078 | 124.198 | 18.541 | 1.00 |
| 9.03      | 1 . . |     |                         |          |         |        |      |
| ATOM 3785 | O     | O   | . LEU LEU LEU B B 57 57 | . 85.385 | 124.392 | 17.342 | 1.00 |
| 10.00     | 1 . . |     |                         |          |         |        |      |
| ATOM 3786 | N     | N   | . GLY GLY GLY B B 58 58 | . 83.840 | 124.417 | 19.004 | 1.00 |
| 8.04      | 1 . . |     |                         |          |         |        |      |
| ATOM 3787 | CA    | CA  | . GLY GLY GLY B B 58 58 | . 82.750 | 125.022 | 18.137 | 1.00 |
| 7.33      | 1 . . |     |                         |          |         |        |      |
| ATOM 3788 | C     | C   | . GLY GLY GLY B B 58 58 | . 82.011 | 124.040 | 17.239 | 1.00 |
| 8.15      | 1 . . |     |                         |          |         |        |      |
| ATOM 3789 | O     | O   | . GLY GLY GLY B B 58 58 | . 81.157 | 124.468 | 16.449 | 1.00 |
| 7.99      | 1 . . |     |                         |          |         |        |      |
| ATOM 3790 | N     | N   | . LYS LYS LYS B B 59 59 | . 82.338 | 122.742 | 17.354 | 1.00 |
| 6.41      | 1 . . |     |                         |          |         |        |      |
| ATOM 3791 | CA    | CA  | . LYS LYS LYS B B 59 59 | . 81.781 | 121.653 | 16.480 | 1.00 |
| 5.67      | 1 . . |     |                         |          |         |        |      |
| ATOM 3792 | CB    | CB  | . LYS LYS LYS B B 59 59 | . 82.958 | 120.806 | 16.003 | 1.00 |
| 7.85      | 1 . . |     |                         |          |         |        |      |
| ATOM 3793 | CG    | CG  | . LYS LYS LYS B B 59 59 | . 84.002 | 121.649 | 15.215 | 1.00 |
| 10.73     | 1 . . |     |                         |          |         |        |      |
| ATOM 3794 | CD    | CD  | . LYS LYS LYS B B 59 59 | . 85.167 | 120.777 | 14.751 | 1.00 |
| 18.63     | 1 . . |     |                         |          |         |        |      |
| ATOM 3795 | CE    | CE  | . LYS LYS LYS B B 59 59 | . 86.053 | 121.534 | 13.820 | 1.00 |
| 19.56     | 1 . . |     |                         |          |         |        |      |

|           |       |     |                                                      |
|-----------|-------|-----|------------------------------------------------------|
| ATOM 3796 | NZ    | NZ  | . LYS LYS LYS B B 59 59 . 87.106 120.684 13.205 1.00 |
| 22.44     | 1 . . |     |                                                      |
| ATOM 3797 | C     | C   | . LYS LYS LYS B B 59 59 . 80.618 120.838 17.013 1.00 |
| 5.21      | 1 . . |     |                                                      |
| ATOM 3798 | O     | O   | . LYS LYS LYS B B 59 59 . 80.177 119.803 16.401 1.00 |
| 4.59      | 1 . . |     |                                                      |
| ATOM 3799 | N     | N   | . GLY GLY GLY B B 60 60 . 80.041 121.245 18.139 1.00 |
| 4.51      | 1 . . |     |                                                      |
| ATOM 3800 | CA    | CA  | . GLY GLY GLY B B 60 60 . 78.916 120.513 18.706 1.00 |
| 3.70      | 1 . . |     |                                                      |
| ATOM 3801 | C     | C   | . GLY GLY GLY B B 60 60 . 77.768 120.531 17.737 1.00 |
| 4.56      | 1 . . |     |                                                      |
| ATOM 3802 | O     | O   | . GLY GLY GLY B B 60 60 . 77.708 121.437 16.816 1.00 |
| 5.34      | 1 . . |     |                                                      |
| ATOM 3803 | N     | N   | . VAL VAL VAL B B 61 61 . 76.881 119.545 17.861 1.00 |
| 3.60      | 1 . . |     |                                                      |
| ATOM 3804 | CA    | CA  | . VAL VAL VAL B B 61 61 . 75.669 119.515 17.052 1.00 |
| 4.46      | 1 . . |     |                                                      |
| ATOM 3805 | CB    | CB  | . VAL VAL VAL B B 61 61 . 75.714 118.429 15.916 1.00 |
| 3.93      | 1 . . |     |                                                      |
| ATOM 3806 | CG1   | CG1 | . VAL VAL VAL B B 61 61 . 76.883 118.725 15.017 1.00 |
| 4.65      | 1 . . |     |                                                      |
| ATOM 3807 | CG2   | CG2 | . VAL VAL VAL B B 61 61 . 75.822 117.008 16.540 1.00 |
| 4.58      | 1 . . |     |                                                      |
| ATOM 3808 | C     | C   | . VAL VAL VAL B B 61 61 . 74.436 119.483 17.905 1.00 |
| 3.11      | 1 . . |     |                                                      |
| ATOM 3809 | O     | O   | . VAL VAL VAL B B 61 61 . 73.434 118.928 17.514 1.00 |
| 3.83      | 1 . . |     |                                                      |
| ATOM 3810 | N     | N   | . LEU LEU LEU B B 62 62 . 74.487 120.197 19.026 1.00 |
| 6.17      | 1 . . |     |                                                      |
| ATOM 3811 | CA    | CA  | . LEU LEU LEU B B 62 62 . 73.348 120.236 19.912 1.00 |
| 6.00      | 1 . . |     |                                                      |
| ATOM 3812 | CB    | CB  | . LEU LEU LEU B B 62 62 . 73.708 120.923 21.244 1.00 |
| 7.11      | 1 . . |     |                                                      |
| ATOM 3813 | CG    | CG  | . LEU LEU LEU B B 62 62 . 74.794 120.234 22.083 1.00 |
| 8.57      | 1 . . |     |                                                      |
| ATOM 3814 | CD1   | CD1 | . LEU LEU LEU B B 62 62 . 74.958 121.086 23.362 1.00 |
| 12.66     | 1 . . |     |                                                      |
| ATOM 3815 | CD2   | CD2 | . LEU LEU LEU B B 62 62 . 74.423 118.806 22.381 1.00 |
| 10.45     | 1 . . |     |                                                      |
| ATOM 3816 | C     | C   | . LEU LEU LEU B B 62 62 . 72.142 120.909 19.277 1.00 |
| 3.92      | 1 . . |     |                                                      |
| ATOM 3817 | O     | O   | . LEU LEU LEU B B 62 62 . 70.992 120.476 19.455 1.00 |
| 4.59      | 1 . . |     |                                                      |
| ATOM 3818 | N     | N   | . LYS LYS LYS B B 63 63 . 72.397 121.900 18.448 1.00 |
| 4.64      | 1 . . |     |                                                      |
| ATOM 3819 | CA    | CA  | . LYS LYS LYS B B 63 63 . 71.270 122.558 17.752 1.00 |
| 4.62      | 1 . . |     |                                                      |
| ATOM 3820 | CB    | CB  | . LYS LYS LYS B B 63 63 . 71.747 123.866 17.124 1.00 |
| 5.87      | 1 . . |     |                                                      |
| ATOM 3821 | CG    | CG  | . LYS LYS LYS B B 63 63 . 72.304 124.808 18.109 1.00 |
| 8.79      | 1 . . |     |                                                      |
| ATOM 3822 | CD    | CD  | . LYS LYS LYS B B 63 63 . 72.611 126.160 17.456 1.00 |
| 11.81     | 1 . . |     |                                                      |







|           |         |     |                           |        |         |        |      |
|-----------|---------|-----|---------------------------|--------|---------|--------|------|
| ATOM 3904 | C       | C   | . PRO PRO PRO B B 74 74 . | 55.822 | 115.740 | 15.388 | 1.00 |
| 9.20      | 1 . . . |     |                           |        |         |        |      |
| ATOM 3905 | O       | O   | . PRO PRO PRO B B 74 74 . | 54.771 | 115.147 | 15.303 | 1.00 |
| 10.04     | 1 . . . |     |                           |        |         |        |      |
| ATOM 3906 | N       | N   | . ALA ALA ALA B B 75 75 . | 56.304 | 116.499 | 14.409 | 1.00 |
| 8.10      | 1 . . . |     |                           |        |         |        |      |
| ATOM 3907 | CA      | CA  | . ALA ALA ALA B B 75 75 . | 55.606 | 116.646 | 13.135 | 1.00 |
| 9.07      | 1 . . . |     |                           |        |         |        |      |
| ATOM 3908 | CB      | CB  | . ALA ALA ALA B B 75 75 . | 56.345 | 117.557 | 12.247 | 1.00 |
| 7.76      | 1 . . . |     |                           |        |         |        |      |
| ATOM 3909 | C       | C   | . ALA ALA ALA B B 75 75 . | 55.449 | 115.300 | 12.417 | 1.00 |
| 8.50      | 1 . . . |     |                           |        |         |        |      |
| ATOM 3910 | O       | O   | . ALA ALA ALA B B 75 75 . | 54.380 | 114.965 | 11.953 | 1.00 |
| 8.22      | 1 . . . |     |                           |        |         |        |      |
| ATOM 3911 | N       | N   | . LEU LEU LEU B B 76 76 . | 56.541 | 114.550 | 12.265 | 1.00 |
| 10.32     | 1 . . . |     |                           |        |         |        |      |
| ATOM 3912 | CA      | CA  | . LEU LEU LEU B B 76 76 . | 56.481 | 113.307 | 11.482 | 1.00 |
| 9.18      | 1 . . . |     |                           |        |         |        |      |
| ATOM 3913 | CB      | CB  | . LEU LEU LEU B B 76 76 . | 57.895 | 112.746 | 11.254 | 1.00 |
| 10.07     | 1 . . . |     |                           |        |         |        |      |
| ATOM 3914 | CG      | CG  | . LEU LEU LEU B B 76 76 . | 58.935 | 113.537 | 10.430 | 1.00 |
| 11.22     | 1 . . . |     |                           |        |         |        |      |
| ATOM 3915 | CD1     | CD1 | . LEU LEU LEU B B 76 76 . | 60.138 | 112.684 | 9.942  | 1.00 |
| 11.81     | 1 . . . |     |                           |        |         |        |      |
| ATOM 3916 | CD2     | CD2 | . LEU LEU LEU B B 76 76 . | 58.351 | 114.202 | 9.192  | 1.00 |
| 10.96     | 1 . . . |     |                           |        |         |        |      |
| ATOM 3917 | C       | C   | . LEU LEU LEU B B 76 76 . | 55.593 | 112.294 | 12.172 | 1.00 |
| 9.86      | 1 . . . |     |                           |        |         |        |      |
| ATOM 3918 | O       | O   | . LEU LEU LEU B B 76 76 . | 54.804 | 111.551 | 11.546 | 1.00 |
| 12.13     | 1 . . . |     |                           |        |         |        |      |
| ATOM 3919 | N       | N   | . ILE ILE ILE B B 77 77 . | 55.728 | 112.233 | 13.499 | 1.00 |
| 9.82      | 1 . . . |     |                           |        |         |        |      |
| ATOM 3920 | CA      | CA  | . ILE ILE ILE B B 77 77 . | 54.895 | 111.340 | 14.273 | 1.00 |
| 12.28     | 1 . . . |     |                           |        |         |        |      |
| ATOM 3921 | CB      | CB  | . ILE ILE ILE B B 77 77 . | 55.364 | 111.312 | 15.770 | 1.00 |
| 12.29     | 1 . . . |     |                           |        |         |        |      |
| ATOM 3922 | CG1     | CG1 | . ILE ILE ILE B B 77 77 . | 56.730 | 110.609 | 15.865 | 1.00 |
| 14.98     | 1 . . . |     |                           |        |         |        |      |
| ATOM 3923 | CD1     | CD1 | . ILE ILE ILE B B 77 77 . | 57.487 | 110.877 | 17.185 | 1.00 |
| 14.69     | 1 . . . |     |                           |        |         |        |      |
| ATOM 3924 | CG2     | CG2 | . ILE ILE ILE B B 77 77 . | 54.312 | 110.620 | 16.630 | 1.00 |
| 12.27     | 1 . . . |     |                           |        |         |        |      |
| ATOM 3925 | C       | C   | . ILE ILE ILE B B 77 77 . | 53.398 | 111.744 | 14.080 | 1.00 |
| 11.82     | 1 . . . |     |                           |        |         |        |      |
| ATOM 3926 | O       | O   | . ILE ILE ILE B B 77 77 . | 52.541 | 110.908 | 13.738 | 1.00 |
| 11.21     | 1 . . . |     |                           |        |         |        |      |
| ATOM 3927 | N       | N   | . SER SER SER B B 78 78 . | 53.124 | 113.042 | 14.156 | 1.00 |
| 14.25     | 1 . . . |     |                           |        |         |        |      |
| ATOM 3928 | CA      | CA  | . SER SER SER B B 78 78 . | 51.733 | 113.486 | 14.074 | 1.00 |
| 15.66     | 1 . . . |     |                           |        |         |        |      |
| ATOM 3929 | CB      | CB  | . SER SER SER B B 78 78 . | 51.590 | 114.947 | 14.510 | 1.00 |
| 16.39     | 1 . . . |     |                           |        |         |        |      |
| ATOM 3930 | OG      | OG  | . SER SER SER B B 78 78 . | 51.559 | 115.030 | 15.929 | 1.00 |
| 19.30     | 1 . . . |     |                           |        |         |        |      |

|           |     |       |                         |          |         |        |      |
|-----------|-----|-------|-------------------------|----------|---------|--------|------|
| ATOM 3931 | C   | C     | . SER SER SER B B 78 78 | . 51.145 | 113.207 | 12.685 | 1.00 |
| 15.07     | 1   | . . . |                         |          |         |        |      |
| ATOM 3932 | O   | O     | . SER SER SER B B 78 78 | . 49.925 | 112.951 | 12.562 | 1.00 |
| 14.08     | 1   | . . . |                         |          |         |        |      |
| ATOM 3933 | N   | N     | . SER SER SER B B 79 79 | . 52.012 | 113.213 | 11.649 | 1.00 |
| 15.43     | 1   | . . . |                         |          |         |        |      |
| ATOM 3934 | CA  | CA    | . SER SER SER B B 79 79 | . 51.536 | 112.970 | 10.273 | 1.00 |
| 15.84     | 1   | . . . |                         |          |         |        |      |
| ATOM 3935 | CB  | CB    | . SER SER SER B B 79 79 | . 52.655 | 113.096 | 9.232  | 1.00 |
| 15.54     | 1   | . . . |                         |          |         |        |      |
| ATOM 3936 | OG  | OG    | . SER SER SER B B 79 79 | . 53.531 | 111.969 | 9.216  | 1.00 |
| 11.33     | 1   | . . . |                         |          |         |        |      |
| ATOM 3937 | C   | C     | . SER SER SER B B 79 79 | . 50.899 | 111.617 | 10.128 | 1.00 |
| 17.05     | 1   | . . . |                         |          |         |        |      |
| ATOM 3938 | O   | O     | . SER SER SER B B 79 79 | . 50.054 | 111.442 | 9.278  | 1.00 |
| 18.26     | 1   | . . . |                         |          |         |        |      |
| ATOM 3939 | N   | N     | . GLY GLY GLY B B 80 80 | . 51.332 | 110.649 | 10.945 | 1.00 |
| 16.45     | 1   | . . . |                         |          |         |        |      |
| ATOM 3940 | CA  | CA    | . GLY GLY GLY B B 80 80 | . 50.910 | 109.243 | 10.772 | 1.00 |
| 16.29     | 1   | . . . |                         |          |         |        |      |
| ATOM 3941 | C   | C     | . GLY GLY GLY B B 80 80 | . 51.365 | 108.562 | 9.480  | 1.00 |
| 15.46     | 1   | . . . |                         |          |         |        |      |
| ATOM 3942 | O   | O     | . GLY GLY GLY B B 80 80 | . 50.957 | 107.437 | 9.178  | 1.00 |
| 16.42     | 1   | . . . |                         |          |         |        |      |
| ATOM 3943 | N   | N     | . LEU LEU LEU B B 81 81 | . 52.191 | 109.234 | 8.693  | 1.00 |
| 14.66     | 1   | . . . |                         |          |         |        |      |
| ATOM 3944 | CA  | CA    | . LEU LEU LEU B B 81 81 | . 52.792 | 108.623 | 7.524  | 1.00 |
| 12.76     | 1   | . . . |                         |          |         |        |      |
| ATOM 3945 | CB  | CB    | . LEU LEU LEU B B 81 81 | . 53.678 | 109.622 | 6.804  | 1.00 |
| 12.47     | 1   | . . . |                         |          |         |        |      |
| ATOM 3946 | CG  | CG    | . LEU LEU LEU B B 81 81 | . 52.882 | 110.720 | 6.107  | 1.00 |
| 10.59     | 1   | . . . |                         |          |         |        |      |
| ATOM 3947 | CD1 | CD1   | . LEU LEU LEU B B 81 81 | . 53.891 | 111.830 | 5.854  | 1.00 |
| 9.02      | 1   | . . . |                         |          |         |        |      |
| ATOM 3948 | CD2 | CD2   | . LEU LEU LEU B B 81 81 | . 52.286 | 110.297 | 4.814  | 1.00 |
| 9.22      | 1   | . . . |                         |          |         |        |      |
| ATOM 3949 | C   | C     | . LEU LEU LEU B B 81 81 | . 53.627 | 107.386 | 7.868  | 1.00 |
| 12.56     | 1   | . . . |                         |          |         |        |      |
| ATOM 3950 | O   | O     | . LEU LEU LEU B B 81 81 | . 54.431 | 107.388 | 8.802  | 1.00 |
| 12.37     | 1   | . . . |                         |          |         |        |      |
| ATOM 3951 | N   | N     | . SER SER SER B B 82 82 | . 53.433 | 106.355 | 7.061  | 1.00 |
| 14.38     | 1   | . . . |                         |          |         |        |      |
| ATOM 3952 | CA  | CA    | . SER SER SER B B 82 82 | . 54.156 | 105.101 | 7.180  | 1.00 |
| 13.79     | 1   | . . . |                         |          |         |        |      |
| ATOM 3953 | CB  | CB    | . SER SER SER B B 82 82 | . 53.541 | 104.020 | 6.269  | 1.00 |
| 15.14     | 1   | . . . |                         |          |         |        |      |
| ATOM 3954 | OG  | OG    | . SER SER SER B B 82 82 | . 54.364 | 102.851 | 6.216  | 1.00 |
| 18.58     | 1   | . . . |                         |          |         |        |      |
| ATOM 3955 | C   | C     | . SER SER SER B B 82 82 | . 55.597 | 105.332 | 6.800  | 1.00 |
| 13.23     | 1   | . . . |                         |          |         |        |      |
| ATOM 3956 | O   | O     | . SER SER SER B B 82 82 | . 55.868 | 106.142 | 5.895  | 1.00 |
| 12.32     | 1   | . . . |                         |          |         |        |      |
| ATOM 3957 | N   | N     | . VAL VAL VAL B B 83 83 | . 56.517 | 104.644 | 7.467  | 1.00 |
| 12.26     | 1   | . . . |                         |          |         |        |      |





|           |       |     |                   |       |          |         |        |      |
|-----------|-------|-----|-------------------|-------|----------|---------|--------|------|
| ATOM 3985 | OE1   | OE1 | . GLN GLN GLN B B | 86 86 | . 63.243 | 106.384 | 3.324  | 1.00 |
| 13.73     | 1 . . |     |                   |       |          |         |        |      |
| ATOM 3986 | NE2   | NE2 | . GLN GLN GLN B B | 86 86 | . 63.891 | 108.519 | 3.303  | 1.00 |
| 11.73     | 1 . . |     |                   |       |          |         |        |      |
| ATOM 3987 | C     | C   | . GLN GLN GLN B B | 86 86 | . 60.050 | 109.261 | 1.439  | 1.00 |
| 11.07     | 1 . . |     |                   |       |          |         |        |      |
| ATOM 3988 | O     | O   | . GLN GLN GLN B B | 86 86 | . 60.442 | 110.264 | 2.054  | 1.00 |
| 10.23     | 1 . . |     |                   |       |          |         |        |      |
| ATOM 3989 | N     | N   | . GLU GLU GLU B B | 87 87 | . 59.515 | 109.323 | 0.228  | 1.00 |
| 10.10     | 1 . . |     |                   |       |          |         |        |      |
| ATOM 3990 | CA    | CA  | . GLU GLU GLU B B | 87 87 | . 59.433 | 110.601 | -0.458 | 1.00 |
| 9.32      | 1 . . |     |                   |       |          |         |        |      |
| ATOM 3991 | CB    | CB  | . GLU GLU GLU B B | 87 87 | . 59.071 | 110.425 | -1.936 | 1.00 |
| 10.40     | 1 . . |     |                   |       |          |         |        |      |
| ATOM 3992 | CG    | CG  | . GLU GLU GLU B B | 87 87 | . 58.897 | 111.762 | -2.712 | 1.00 |
| 16.45     | 1 . . |     |                   |       |          |         |        |      |
| ATOM 3993 | CD    | CD  | . GLU GLU GLU B B | 87 87 | . 58.629 | 111.564 | -4.233 | 1.00 |
| 22.85     | 1 . . |     |                   |       |          |         |        |      |
| ATOM 3994 | OE1   | OE1 | . GLU GLU GLU B B | 87 87 | . 58.451 | 112.578 | -4.946 | 1.00 |
| 25.50     | 1 . . |     |                   |       |          |         |        |      |
| ATOM 3995 | OE2   | OE2 | . GLU GLU GLU B B | 87 87 | . 58.598 | 110.408 | -4.712 | 1.00 |
| 22.78     | 1 . . |     |                   |       |          |         |        |      |
| ATOM 3996 | C     | C   | . GLU GLU GLU B B | 87 87 | . 58.483 | 111.565 | 0.272  | 1.00 |
| 9.68      | 1 . . |     |                   |       |          |         |        |      |
| ATOM 3997 | O     | O   | . GLU GLU GLU B B | 87 87 | . 58.830 | 112.742 | 0.446  | 1.00 |
| 7.38      | 1 . . |     |                   |       |          |         |        |      |
| ATOM 3998 | N     | N   | . LYS LYS LYS B B | 88 88 | . 57.307 | 111.080 | 0.705  | 1.00 |
| 8.62      | 1 . . |     |                   |       |          |         |        |      |
| ATOM 3999 | CA    | CA  | . LYS LYS LYS B B | 88 88 | . 56.411 | 111.907 | 1.538  | 1.00 |
| 11.38     | 1 . . |     |                   |       |          |         |        |      |
| ATOM 4000 | CB    | CB  | . LYS LYS LYS B B | 88 88 | . 55.163 | 111.122 | 1.897  | 1.00 |
| 12.23     | 1 . . |     |                   |       |          |         |        |      |
| ATOM 4001 | CG    | CG  | . LYS LYS LYS B B | 88 88 | . 54.399 | 110.652 | 0.698  | 1.00 |
| 14.38     | 1 . . |     |                   |       |          |         |        |      |
| ATOM 4002 | CD    | CD  | . LYS LYS LYS B B | 88 88 | . 53.525 | 111.728 | 0.078  | 1.00 |
| 18.33     | 1 . . |     |                   |       |          |         |        |      |
| ATOM 4003 | CE    | CE  | . LYS LYS LYS B B | 88 88 | . 52.081 | 111.226 | -0.065 | 1.00 |
| 20.31     | 1 . . |     |                   |       |          |         |        |      |
| ATOM 4004 | NZ    | NZ  | . LYS LYS LYS B B | 88 88 | . 51.473 | 111.004 | 1.310  | 1.00 |
| 24.38     | 1 . . |     |                   |       |          |         |        |      |
| ATOM 4005 | C     | C   | . LYS LYS LYS B B | 88 88 | . 57.060 | 112.459 | 2.814  | 1.00 |
| 10.21     | 1 . . |     |                   |       |          |         |        |      |
| ATOM 4006 | O     | O   | . LYS LYS LYS B B | 88 88 | . 56.945 | 113.654 | 3.176  | 1.00 |
| 9.48      | 1 . . |     |                   |       |          |         |        |      |
| ATOM 4007 | N     | N   | . LEU LEU LEU B B | 89 89 | . 57.793 | 111.581 | 3.477  | 1.00 |
| 9.76      | 1 . . |     |                   |       |          |         |        |      |
| ATOM 4008 | CA    | CA  | . LEU LEU LEU B B | 89 89 | . 58.423 | 111.942 | 4.739  | 1.00 |
| 7.81      | 1 . . |     |                   |       |          |         |        |      |
| ATOM 4009 | CB    | CB  | . LEU LEU LEU B B | 89 89 | . 58.817 | 110.714 | 5.546  | 1.00 |
| 8.21      | 1 . . |     |                   |       |          |         |        |      |
| ATOM 4010 | CG    | CG  | . LEU LEU LEU B B | 89 89 | . 57.676 | 110.125 | 6.439  | 1.00 |
| 7.38      | 1 . . |     |                   |       |          |         |        |      |
| ATOM 4011 | CD1   | CD1 | . LEU LEU LEU B B | 89 89 | . 58.079 | 108.785 | 6.962  | 1.00 |
| 8.39      | 1 . . |     |                   |       |          |         |        |      |

|           |       |     |                           |        |         |        |      |
|-----------|-------|-----|---------------------------|--------|---------|--------|------|
| ATOM 4012 | CD2   | CD2 | . LEU LEU LEU B B 89 89 . | 57.287 | 110.959 | 7.626  | 1.00 |
| 8.15      | 1 . . |     |                           |        |         |        |      |
| ATOM 4013 | C     | C   | . LEU LEU LEU B B 89 89 . | 59.601 | 112.923 | 4.552  | 1.00 |
| 7.28      | 1 . . |     |                           |        |         |        |      |
| ATOM 4014 | O     | O   | . LEU LEU LEU B B 89 89 . | 59.671 | 113.948 | 5.231  | 1.00 |
| 7.15      | 1 . . |     |                           |        |         |        |      |
| ATOM 4015 | N     | N   | . ASP ASP ASP B B 90 90 . | 60.436 | 112.678 | 3.549  | 1.00 |
| 6.93      | 1 . . |     |                           |        |         |        |      |
| ATOM 4016 | CA    | CA  | . ASP ASP ASP B B 90 90 . | 61.555 | 113.542 | 3.273  | 1.00 |
| 7.67      | 1 . . |     |                           |        |         |        |      |
| ATOM 4017 | CB    | CB  | . ASP ASP ASP B B 90 90 . | 62.419 | 112.986 | 2.151  | 1.00 |
| 7.06      | 1 . . |     |                           |        |         |        |      |
| ATOM 4018 | CG    | CG  | . ASP ASP ASP B B 90 90 . | 63.410 | 111.974 | 2.635  | 1.00 |
| 7.76      | 1 . . |     |                           |        |         |        |      |
| ATOM 4019 | OD1   | OD1 | . ASP ASP ASP B B 90 90 . | 63.700 | 111.958 | 3.847  | 1.00 |
| 8.23      | 1 . . |     |                           |        |         |        |      |
| ATOM 4020 | OD2   | OD2 | . ASP ASP ASP B B 90 90 . | 63.850 | 111.149 | 1.817  | 1.00 |
| 10.50     | 1 . . |     |                           |        |         |        |      |
| ATOM 4021 | C     | C   | . ASP ASP ASP B B 90 90 . | 61.004 | 114.924 | 2.882  | 1.00 |
| 8.33      | 1 . . |     |                           |        |         |        |      |
| ATOM 4022 | O     | O   | . ASP ASP ASP B B 90 90 . | 61.546 | 115.939 | 3.293  | 1.00 |
| 6.12      | 1 . . |     |                           |        |         |        |      |
| ATOM 4023 | N     | N   | . ASN ASN ASN B B 91 91 . | 59.916 | 114.921 | 2.089  | 1.00 |
| 9.65      | 1 . . |     |                           |        |         |        |      |
| ATOM 4024 | CA    | CA  | . ASN ASN ASN B B 91 91 . | 59.395 | 116.168 | 1.524  | 1.00 |
| 11.10     | 1 . . |     |                           |        |         |        |      |
| ATOM 4025 | CB    | CB  | . ASN ASN ASN B B 91 91 . | 58.370 | 115.930 | 0.404  | 1.00 |
| 12.82     | 1 . . |     |                           |        |         |        |      |
| ATOM 4026 | CG    | CG  | . ASN ASN ASN B B 91 91 . | 58.096 | 117.189 | -0.409 | 1.00 |
| 17.20     | 1 . . |     |                           |        |         |        |      |
| ATOM 4027 | OD1   | OD1 | . ASN ASN ASN B B 91 91 . | 57.031 | 117.797 | -0.291 | 1.00 |
| 23.49     | 1 . . |     |                           |        |         |        |      |
| ATOM 4028 | ND2   | ND2 | . ASN ASN ASN B B 91 91 . | 59.067 | 117.600 | -1.213 | 1.00 |
| 18.09     | 1 . . |     |                           |        |         |        |      |
| ATOM 4029 | C     | C   | . ASN ASN ASN B B 91 91 . | 58.767 | 116.982 | 2.643  | 1.00 |
| 10.17     | 1 . . |     |                           |        |         |        |      |
| ATOM 4030 | O     | O   | . ASN ASN ASN B B 91 91 . | 58.894 | 118.178 | 2.666  | 1.00 |
| 10.31     | 1 . . |     |                           |        |         |        |      |
| ATOM 4031 | N     | N   | . LEU LEU LEU B B 92 92 . | 58.142 | 116.303 | 3.601  | 1.00 |
| 9.80      | 1 . . |     |                           |        |         |        |      |
| ATOM 4032 | CA    | CA  | . LEU LEU LEU B B 92 92 . | 57.533 | 117.016 | 4.725  | 1.00 |
| 8.53      | 1 . . |     |                           |        |         |        |      |
| ATOM 4033 | CB    | CB  | . LEU LEU LEU B B 92 92 . | 56.712 | 116.075 | 5.611  | 1.00 |
| 9.47      | 1 . . |     |                           |        |         |        |      |
| ATOM 4034 | CG    | CG  | . LEU LEU LEU B B 92 92 . | 56.125 | 116.645 | 6.918  | 1.00 |
| 11.03     | 1 . . |     |                           |        |         |        |      |
| ATOM 4035 | CD1   | CD1 | . LEU LEU LEU B B 92 92 . | 55.212 | 117.959 | 6.700  | 1.00 |
| 7.95      | 1 . . |     |                           |        |         |        |      |
| ATOM 4036 | CD2   | CD2 | . LEU LEU LEU B B 92 92 . | 55.248 | 115.578 | 7.614  | 1.00 |
| 9.53      | 1 . . |     |                           |        |         |        |      |
| ATOM 4037 | C     | C   | . LEU LEU LEU B B 92 92 . | 58.618 | 117.732 | 5.502  | 1.00 |
| 8.10      | 1 . . |     |                           |        |         |        |      |
| ATOM 4038 | O     | O   | . LEU LEU LEU B B 92 92 . | 58.499 | 118.903 | 5.862  | 1.00 |
| 8.78      | 1 . . |     |                           |        |         |        |      |

|           |       |     |                           |        |         |        |      |
|-----------|-------|-----|---------------------------|--------|---------|--------|------|
| ATOM 4039 | N     | N   | . MET MET MET B B 93 93 . | 59.720 | 117.025 | 5.719  | 1.00 |
| 5.74      | 1 . . |     |                           |        |         |        |      |
| ATOM 4040 | CA    | CA  | . MET MET MET B B 93 93 . | 60.846 | 117.643 | 6.393  | 1.00 |
| 5.81      | 1 . . |     |                           |        |         |        |      |
| ATOM 4041 | CB    | CB  | . MET MET MET B B 93 93 . | 61.947 | 116.618 | 6.676  | 1.00 |
| 7.24      | 1 . . |     |                           |        |         |        |      |
| ATOM 4042 | CG    | CG  | . MET MET MET B B 93 93 . | 61.634 | 115.507 | 7.683  | 1.00 |
| 4.96      | 1 . . |     |                           |        |         |        |      |
| ATOM 4043 | SD    | SD  | . MET MET MET B B 93 93 . | 63.174 | 114.627 | 8.227  | 1.00 |
| 7.55      | 1 . . |     |                           |        |         |        |      |
| ATOM 4044 | CE    | CE  | . MET MET MET B B 93 93 . | 63.616 | 113.588 | 6.823  | 1.00 |
| 7.51      | 1 . . |     |                           |        |         |        |      |
| ATOM 4045 | C     | C   | . MET MET MET B B 93 93 . | 61.480 | 118.813 | 5.641  | 1.00 |
| 6.63      | 1 . . |     |                           |        |         |        |      |
| ATOM 4046 | O     | O   | . MET MET MET B B 93 93 . | 61.881 | 119.846 | 6.241  | 1.00 |
| 7.07      | 1 . . |     |                           |        |         |        |      |
| ATOM 4047 | N     | N   | . LEU LEU LEU B B 94 94 . | 61.597 | 118.667 | 4.320  | 1.00 |
| 4.88      | 1 . . |     |                           |        |         |        |      |
| ATOM 4048 | CA    | CA  | . LEU LEU LEU B B 94 94 . | 62.059 | 119.831 | 3.552  | 1.00 |
| 5.90      | 1 . . |     |                           |        |         |        |      |
| ATOM 4049 | CB    | CB  | . LEU LEU LEU B B 94 94 . | 62.180 | 119.505 | 2.068  | 1.00 |
| 5.26      | 1 . . |     |                           |        |         |        |      |
| ATOM 4050 | CG    | CG  | . LEU LEU LEU B B 94 94 . | 63.082 | 118.410 | 1.499  | 1.00 |
| 8.52      | 1 . . |     |                           |        |         |        |      |
| ATOM 4051 | CD1   | CD1 | . LEU LEU LEU B B 94 94 . | 63.173 | 118.345 | -0.027 | 1.00 |
| 11.28     | 1 . . |     |                           |        |         |        |      |
| ATOM 4052 | CD2   | CD2 | . LEU LEU LEU B B 94 94 . | 64.396 | 118.531 | 2.030  | 1.00 |
| 8.18      | 1 . . |     |                           |        |         |        |      |
| ATOM 4053 | C     | C   | . LEU LEU LEU B B 94 94 . | 61.158 | 121.067 | 3.696  | 1.00 |
| 7.47      | 1 . . |     |                           |        |         |        |      |
| ATOM 4054 | O     | O   | . LEU LEU LEU B B 94 94 . | 61.654 | 122.160 | 3.786  | 1.00 |
| 8.98      | 1 . . |     |                           |        |         |        |      |
| ATOM 4055 | N     | N   | . GLU GLU GLU B B 95 95 . | 59.847 | 120.866 | 3.693  | 1.00 |
| 7.99      | 1 . . |     |                           |        |         |        |      |
| ATOM 4056 | CA    | CA  | . GLU GLU GLU B B 95 95 . | 58.868 | 121.986 | 3.798  | 1.00 |
| 10.52     | 1 . . |     |                           |        |         |        |      |
| ATOM 4057 | CB    | CB  | . GLU GLU GLU B B 95 95 . | 57.453 | 121.478 | 3.504  | 1.00 |
| 11.15     | 1 . . |     |                           |        |         |        |      |
| ATOM 4058 | CG    | CG  | . GLU GLU GLU B B 95 95 . | 57.351 | 120.847 | 2.151  | 1.00 |
| 16.78     | 1 . . |     |                           |        |         |        |      |
| ATOM 4059 | CD    | CD  | . GLU GLU GLU B B 95 95 . | 57.151 | 121.847 | 1.050  | 1.00 |
| 24.87     | 1 . . |     |                           |        |         |        |      |
| ATOM 4060 | OE1   | OE1 | . GLU GLU GLU B B 95 95 . | 55.989 | 121.928 | 0.582  | 1.00 |
| 29.02     | 1 . . |     |                           |        |         |        |      |
| ATOM 4061 | OE2   | OE2 | . GLU GLU GLU B B 95 95 . | 58.132 | 122.550 | 0.660  | 1.00 |
| 24.08     | 1 . . |     |                           |        |         |        |      |
| ATOM 4062 | C     | C   | . GLU GLU GLU B B 95 95 . | 58.951 | 122.604 | 5.208  | 1.00 |
| 11.01     | 1 . . |     |                           |        |         |        |      |
| ATOM 4063 | O     | O   | . GLU GLU GLU B B 95 95 . | 58.863 | 123.810 | 5.369  | 1.00 |
| 11.88     | 1 . . |     |                           |        |         |        |      |
| ATOM 4064 | N     | N   | . LEU LEU LEU B B 96 96 . | 59.100 | 121.759 | 6.231  | 1.00 |
| 10.09     | 1 . . |     |                           |        |         |        |      |
| ATOM 4065 | CA    | CA  | . LEU LEU LEU B B 96 96 . | 59.237 | 122.263 | 7.586  | 1.00 |
| 9.55      | 1 . . |     |                           |        |         |        |      |

|           |       |     |                             |        |         |        |      |
|-----------|-------|-----|-----------------------------|--------|---------|--------|------|
| ATOM 4066 | CB    | CB  | . LEU LEU LEU B B 96 96 .   | 59.317 | 121.114 | 8.600  | 1.00 |
| 10.31     | 1 . . |     |                             |        |         |        |      |
| ATOM 4067 | CG    | CG  | . LEU LEU LEU B B 96 96 .   | 58.030 | 120.543 | 9.132  | 1.00 |
| 12.04     | 1 . . |     |                             |        |         |        |      |
| ATOM 4068 | CD1   | CD1 | . LEU LEU LEU B B 96 96 .   | 58.288 | 119.157 | 9.771  | 1.00 |
| 15.65     | 1 . . |     |                             |        |         |        |      |
| ATOM 4069 | CD2   | CD2 | . LEU LEU LEU B B 96 96 .   | 57.293 | 121.475 | 10.086 | 1.00 |
| 12.66     | 1 . . |     |                             |        |         |        |      |
| ATOM 4070 | C     | C   | . LEU LEU LEU B B 96 96 .   | 60.473 | 123.156 | 7.745  | 1.00 |
| 10.44     | 1 . . |     |                             |        |         |        |      |
| ATOM 4071 | O     | O   | . LEU LEU LEU B B 96 96 .   | 60.442 | 124.183 | 8.373  | 1.00 |
| 10.09     | 1 . . |     |                             |        |         |        |      |
| ATOM 4072 | N     | N   | . ASP ASP ASP B B 97 97 .   | 61.570 | 122.745 | 7.140  | 1.00 |
| 9.72      | 1 . . |     |                             |        |         |        |      |
| ATOM 4073 | CA    | CA  | . ASP ASP ASP B B 97 97 .   | 62.748 | 123.548 | 7.164  | 1.00 |
| 9.13      | 1 . . |     |                             |        |         |        |      |
| ATOM 4074 | CB    | CB  | . ASP ASP ASP B B 97 97 .   | 63.932 | 122.732 | 6.599  | 1.00 |
| 11.28     | 1 . . |     |                             |        |         |        |      |
| ATOM 4075 | CG    | CG  | . ASP ASP ASP B B 97 97 .   | 65.151 | 123.579 | 6.326  | 1.00 |
| 8.90      | 1 . . |     |                             |        |         |        |      |
| ATOM 4076 | OD1   | OD1 | . ASP ASP ASP B B 97 97 .   | 66.098 | 123.601 | 7.142  | 1.00 |
| 11.49     | 1 . . |     |                             |        |         |        |      |
| ATOM 4077 | OD2   | OD2 | . ASP ASP ASP B B 97 97 .   | 65.197 | 124.225 | 5.257  | 1.00 |
| 11.60     | 1 . . |     |                             |        |         |        |      |
| ATOM 4078 | C     | C   | . ASP ASP ASP B B 97 97 .   | 62.527 | 124.837 | 6.336  | 1.00 |
| 9.20      | 1 . . |     |                             |        |         |        |      |
| ATOM 4079 | O     | O   | . ASP ASP ASP B B 97 97 .   | 63.014 | 125.916 | 6.722  | 1.00 |
| 8.69      | 1 . . |     |                             |        |         |        |      |
| ATOM 4080 | N     | N   | . GLY GLY GLY B B 98 98 .   | 61.805 | 124.726 | 5.211  | 1.00 |
| 9.00      | 1 . . |     |                             |        |         |        |      |
| ATOM 4081 | CA    | CA  | . GLY GLY GLY B B 98 98 .   | 61.443 | 125.916 | 4.405  | 1.00 |
| 10.31     | 1 . . |     |                             |        |         |        |      |
| ATOM 4082 | C     | C   | . GLY GLY GLY B B 98 98 .   | 62.616 | 126.664 | 3.753  | 1.00 |
| 12.04     | 1 . . |     |                             |        |         |        |      |
| ATOM 4083 | O     | O   | . GLY GLY GLY B B 98 98 .   | 62.452 | 127.807 | 3.283  | 1.00 |
| 14.63     | 1 . . |     |                             |        |         |        |      |
| ATOM 4084 | N     | N   | . THR THR THR B B 99 99 .   | 63.805 | 126.081 | 3.669  | 1.00 |
| 13.10     | 1 . . |     |                             |        |         |        |      |
| ATOM 4085 | CA    | CA  | . THR THR THR B B 99 99 .   | 64.948 | 126.788 | 3.025  | 1.00 |
| 11.69     | 1 . . |     |                             |        |         |        |      |
| ATOM 4086 | CB    | CB  | . THR THR THR B B 99 99 .   | 66.002 | 127.261 | 4.035  | 1.00 |
| 11.48     | 1 . . |     |                             |        |         |        |      |
| ATOM 4087 | OG1   | OG1 | . THR THR THR B B 99 99 .   | 66.762 | 126.135 | 4.489  | 1.00 |
| 11.11     | 1 . . |     |                             |        |         |        |      |
| ATOM 4088 | CG2   | CG2 | . THR THR THR B B 99 99 .   | 65.355 | 127.974 | 5.317  | 1.00 |
| 11.61     | 1 . . |     |                             |        |         |        |      |
| ATOM 4089 | C     | C   | . THR THR THR B B 99 99 .   | 65.607 | 125.939 | 1.945  | 1.00 |
| 13.20     | 1 . . |     |                             |        |         |        |      |
| ATOM 4090 | O     | O   | . THR THR THR B B 99 99 .   | 65.588 | 124.723 | 2.034  | 1.00 |
| 13.54     | 1 . . |     |                             |        |         |        |      |
| ATOM 4091 | N     | N   | . GLU GLU GLU B B 100 100 . | 66.139 | 126.564 | 0.901  | 1.00 |
| 13.59     | 1 . . |     |                             |        |         |        |      |
| ATOM 4092 | CA    | CA  | . GLU GLU GLU B B 100 100 . | 66.676 | 125.817 | -0.201 | 1.00 |
| 14.22     | 1 . . |     |                             |        |         |        |      |

|           |       |     |                             |        |         |        |      |
|-----------|-------|-----|-----------------------------|--------|---------|--------|------|
| ATOM 4093 | CB    | CB  | . GLU GLU GLU B B 100 100 . | 67.143 | 126.754 | -1.320 | 1.00 |
| 15.66     | 1 . . |     |                             |        |         |        |      |
| ATOM 4094 | CG    | CG  | . GLU GLU GLU B B 100 100 . | 67.737 | 125.984 | -2.505 | 1.00 |
| 21.14     | 1 . . |     |                             |        |         |        |      |
| ATOM 4095 | CD    | CD  | . GLU GLU GLU B B 100 100 . | 66.747 | 124.970 | -3.066 | 1.00 |
| 26.95     | 1 . . |     |                             |        |         |        |      |
| ATOM 4096 | OE1   | OE1 | . GLU GLU GLU B B 100 100 . | 65.851 | 125.390 | -3.855 | 1.00 |
| 29.93     | 1 . . |     |                             |        |         |        |      |
| ATOM 4097 | OE2   | OE2 | . GLU GLU GLU B B 100 100 . | 66.847 | 123.765 | -2.685 | 1.00 |
| 30.80     | 1 . . |     |                             |        |         |        |      |
| ATOM 4098 | C     | C   | . GLU GLU GLU B B 100 100 . | 67.840 | 124.930 | 0.270  | 1.00 |
| 11.51     | 1 . . |     |                             |        |         |        |      |
| ATOM 4099 | O     | O   | . GLU GLU GLU B B 100 100 . | 67.930 | 123.772 | -0.137 | 1.00 |
| 13.38     | 1 . . |     |                             |        |         |        |      |
| ATOM 4100 | N     | N   | . ASN ASN ASN B B 101 101 . | 68.731 | 125.472 | 1.099  | 1.00 |
| 8.59      | 1 . . |     |                             |        |         |        |      |
| ATOM 4101 | CA    | CA  | . ASN ASN ASN B B 101 101 . | 69.915 | 124.743 | 1.475  | 1.00 |
| 9.29      | 1 . . |     |                             |        |         |        |      |
| ATOM 4102 | CB    | CB  | . ASN ASN ASN B B 101 101 . | 71.182 | 125.602 | 1.383  | 1.00 |
| 9.34      | 1 . . |     |                             |        |         |        |      |
| ATOM 4103 | CG    | CG  | . ASN ASN ASN B B 101 101 . | 71.202 | 126.748 | 2.404  | 1.00 |
| 13.99     | 1 . . |     |                             |        |         |        |      |
| ATOM 4104 | OD1   | OD1 | . ASN ASN ASN B B 101 101 . | 72.278 | 127.123 | 2.917  | 1.00 |
| 18.47     | 1 . . |     |                             |        |         |        |      |
| ATOM 4105 | ND2   | ND2 | . ASN ASN ASN B B 101 101 . | 70.003 | 127.296 | 2.736  | 1.00 |
| 16.05     | 1 . . |     |                             |        |         |        |      |
| ATOM 4106 | C     | C   | . ASN ASN ASN B B 101 101 . | 69.840 | 124.095 | 2.825  | 1.00 |
| 7.15      | 1 . . |     |                             |        |         |        |      |
| ATOM 4107 | O     | O   | . ASN ASN ASN B B 101 101 . | 70.856 | 123.685 | 3.356  | 1.00 |
| 6.64      | 1 . . |     |                             |        |         |        |      |
| ATOM 4108 | N     | N   | . LYS LYS LYS B B 102 102 . | 68.636 | 123.990 | 3.387  | 1.00 |
| 5.26      | 1 . . |     |                             |        |         |        |      |
| ATOM 4109 | CA    | CA  | . LYS LYS LYS B B 102 102 . | 68.474 | 123.262 | 4.698  | 1.00 |
| 5.81      | 1 . . |     |                             |        |         |        |      |
| ATOM 4110 | CB    | CB  | . LYS LYS LYS B B 102 102 . | 68.929 | 121.799 | 4.613  | 1.00 |
| 6.29      | 1 . . |     |                             |        |         |        |      |
| ATOM 4111 | CG    | CG  | . LYS LYS LYS B B 102 102 . | 68.174 | 121.026 | 3.583  | 1.00 |
| 7.29      | 1 . . |     |                             |        |         |        |      |
| ATOM 4112 | CD    | CD  | . LYS LYS LYS B B 102 102 . | 68.626 | 119.565 | 3.358  | 1.00 |
| 7.52      | 1 . . |     |                             |        |         |        |      |
| ATOM 4113 | CE    | CE  | . LYS LYS LYS B B 102 102 . | 67.544 | 118.820 | 2.546  | 1.00 |
| 7.20      | 1 . . |     |                             |        |         |        |      |
| ATOM 4114 | NZ    | NZ  | . LYS LYS LYS B B 102 102 . | 67.576 | 119.329 | 1.196  | 1.00 |
| 7.53      | 1 . . |     |                             |        |         |        |      |
| ATOM 4115 | C     | C   | . LYS LYS LYS B B 102 102 . | 69.184 | 123.966 | 5.839  | 1.00 |
| 5.88      | 1 . . |     |                             |        |         |        |      |
| ATOM 4116 | O     | O   | . LYS LYS LYS B B 102 102 . | 69.690 | 123.331 | 6.761  | 1.00 |
| 6.32      | 1 . . |     |                             |        |         |        |      |
| ATOM 4117 | N     | N   | . SER SER SER B B 103 103 . | 69.186 | 125.288 | 5.814  | 1.00 |
| 6.55      | 1 . . |     |                             |        |         |        |      |
| ATOM 4118 | CA    | CA  | . SER SER SER B B 103 103 . | 69.868 | 126.100 | 6.795  | 1.00 |
| 8.28      | 1 . . |     |                             |        |         |        |      |
| ATOM 4119 | CB    | CB  | . SER SER SER B B 103 103 . | 70.335 | 127.387 | 6.158  | 1.00 |
| 9.65      | 1 . . |     |                             |        |         |        |      |

|           |         |     |                             |        |         |        |      |
|-----------|---------|-----|-----------------------------|--------|---------|--------|------|
| ATOM 4120 | OG      | OG  | . SER SER SER B B 103 103 . | 69.213 | 128.058 | 5.567  | 1.00 |
| 11.17     | 1 . . . |     |                             |        |         |        |      |
| ATOM 4121 | C       | C   | . SER SER SER B B 103 103 . | 69.025 | 126.409 | 8.049  | 1.00 |
| 8.38      | 1 . . . |     |                             |        |         |        |      |
| ATOM 4122 | O       | O   | . SER SER SER B B 103 103 . | 69.546 | 126.924 | 9.035  | 1.00 |
| 9.79      | 1 . . . |     |                             |        |         |        |      |
| ATOM 4123 | N       | N   | . LYS LYS LYS B B 104 104 . | 67.756 | 126.022 | 8.047  | 1.00 |
| 7.75      | 1 . . . |     |                             |        |         |        |      |
| ATOM 4124 | CA      | CA  | . LYS LYS LYS B B 104 104 . | 66.898 | 126.243 | 9.221  | 1.00 |
| 8.56      | 1 . . . |     |                             |        |         |        |      |
| ATOM 4125 | CB      | CB  | . LYS LYS LYS B B 104 104 . | 65.424 | 126.360 | 8.774  | 1.00 |
| 8.60      | 1 . . . |     |                             |        |         |        |      |
| ATOM 4126 | CG      | CG  | . LYS LYS LYS B B 104 104 . | 64.363 | 126.527 | 9.844  | 1.00 |
| 12.56     | 1 . . . |     |                             |        |         |        |      |
| ATOM 4127 | CD      | CD  | . LYS LYS LYS B B 104 104 . | 64.596 | 127.824 | 10.596 | 1.00 |
| 16.37     | 1 . . . |     |                             |        |         |        |      |
| ATOM 4128 | CE      | CE  | . LYS LYS LYS B B 104 104 . | 63.616 | 128.011 | 11.772 | 1.00 |
| 17.40     | 1 . . . |     |                             |        |         |        |      |
| ATOM 4129 | NZ      | NZ  | . LYS LYS LYS B B 104 104 . | 63.865 | 129.251 | 12.528 | 1.00 |
| 16.17     | 1 . . . |     |                             |        |         |        |      |
| ATOM 4130 | C       | C   | . LYS LYS LYS B B 104 104 . | 67.176 | 125.114 | 10.249 | 1.00 |
| 7.73      | 1 . . . |     |                             |        |         |        |      |
| ATOM 4131 | O       | O   | . LYS LYS LYS B B 104 104 . | 67.555 | 125.375 | 11.407 | 1.00 |
| 7.68      | 1 . . . |     |                             |        |         |        |      |
| ATOM 4132 | N       | N   | . PHE PHE PHE B B 105 105 . | 67.101 | 123.888 | 9.795  | 1.00 |
| 7.07      | 1 . . . |     |                             |        |         |        |      |
| ATOM 4133 | CA      | CA  | . PHE PHE PHE B B 105 105 . | 67.393 | 122.717 | 10.664 | 1.00 |
| 6.46      | 1 . . . |     |                             |        |         |        |      |
| ATOM 4134 | CB      | CB  | . PHE PHE PHE B B 105 105 . | 66.422 | 121.545 | 10.456 | 1.00 |
| 5.75      | 1 . . . |     |                             |        |         |        |      |
| ATOM 4135 | CG      | CG  | . PHE PHE PHE B B 105 105 . | 64.988 | 121.910 | 10.658 | 1.00 |
| 7.58      | 1 . . . |     |                             |        |         |        |      |
| ATOM 4136 | CD1     | CD1 | . PHE PHE PHE B B 105 105 . | 63.968 | 121.234 | 9.984  | 1.00 |
| 8.19      | 1 . . . |     |                             |        |         |        |      |
| ATOM 4137 | CE1     | CE1 | . PHE PHE PHE B B 105 105 . | 62.588 | 121.558 | 10.221 | 1.00 |
| 11.37     | 1 . . . |     |                             |        |         |        |      |
| ATOM 4138 | CZ      | CZ  | . PHE PHE PHE B B 105 105 . | 62.282 | 122.612 | 11.129 | 1.00 |
| 11.89     | 1 . . . |     |                             |        |         |        |      |
| ATOM 4139 | CE2     | CE2 | . PHE PHE PHE B B 105 105 . | 63.311 | 123.291 | 11.790 | 1.00 |
| 9.83      | 1 . . . |     |                             |        |         |        |      |
| ATOM 4140 | CD2     | CD2 | . PHE PHE PHE B B 105 105 . | 64.652 | 122.919 | 11.555 | 1.00 |
| 10.24     | 1 . . . |     |                             |        |         |        |      |
| ATOM 4141 | C       | C   | . PHE PHE PHE B B 105 105 . | 68.810 | 122.164 | 10.572 | 1.00 |
| 5.51      | 1 . . . |     |                             |        |         |        |      |
| ATOM 4142 | O       | O   | . PHE PHE PHE B B 105 105 . | 69.299 | 121.561 | 11.508 | 1.00 |
| 5.40      | 1 . . . |     |                             |        |         |        |      |
| ATOM 4143 | N       | N   | . GLY GLY GLY B B 106 106 . | 69.466 | 122.376 | 9.445  | 1.00 |
| 5.05      | 1 . . . |     |                             |        |         |        |      |
| ATOM 4144 | CA      | CA  | . GLY GLY GLY B B 106 106 . | 70.749 | 121.766 | 9.114  | 1.00 |
| 5.88      | 1 . . . |     |                             |        |         |        |      |
| ATOM 4145 | C       | C   | . GLY GLY GLY B B 106 106 . | 70.511 | 120.523 | 8.291  | 1.00 |
| 3.30      | 1 . . . |     |                             |        |         |        |      |
| ATOM 4146 | O       | O   | . GLY GLY GLY B B 106 106 . | 69.558 | 119.737 | 8.554  | 1.00 |
| 3.23      | 1 . . . |     |                             |        |         |        |      |

|           |     |       |                   |         |          |         |        |      |
|-----------|-----|-------|-------------------|---------|----------|---------|--------|------|
| ATOM 4147 | N   | N     | . ALA ALA ALA B B | 107 107 | . 71.342 | 120.314 | 7.289  | 1.00 |
| 5.04      | 1   | . . . |                   |         |          |         |        |      |
| ATOM 4148 | CA  | CA    | . ALA ALA ALA B B | 107 107 | . 71.224 | 119.104 | 6.450  | 1.00 |
| 3.73      | 1   | . . . |                   |         |          |         |        |      |
| ATOM 4149 | CB  | CB    | . ALA ALA ALA B B | 107 107 | . 72.144 | 119.162 | 5.218  | 1.00 |
| 4.10      | 1   | . . . |                   |         |          |         |        |      |
| ATOM 4150 | C   | C     | . ALA ALA ALA B B | 107 107 | . 71.504 | 117.842 | 7.255  | 1.00 |
| 3.09      | 1   | . . . |                   |         |          |         |        |      |
| ATOM 4151 | O   | O     | . ALA ALA ALA B B | 107 107 | . 70.972 | 116.775 | 6.938  | 1.00 |
| 4.18      | 1   | . . . |                   |         |          |         |        |      |
| ATOM 4152 | N   | N     | . ASN ASN ASN B B | 108 108 | . 72.357 | 118.006 | 8.261  | 1.00 |
| 2.75      | 1   | . . . |                   |         |          |         |        |      |
| ATOM 4153 | CA  | CA    | . ASN ASN ASN B B | 108 108 | . 72.693 | 116.951 | 9.188  | 1.00 |
| 2.88      | 1   | . . . |                   |         |          |         |        |      |
| ATOM 4154 | CB  | CB    | . ASN ASN ASN B B | 108 108 | . 73.950 | 117.270 | 9.978  | 1.00 |
| 3.48      | 1   | . . . |                   |         |          |         |        |      |
| ATOM 4155 | CG  | CG    | . ASN ASN ASN B B | 108 108 | . 73.925 | 118.626 | 10.669 | 1.00 |
| 3.87      | 1   | . . . |                   |         |          |         |        |      |
| ATOM 4156 | OD1 | OD1   | . ASN ASN ASN B B | 108 108 | . 73.208 | 119.555 | 10.228 | 1.00 |
| 3.95      | 1   | . . . |                   |         |          |         |        |      |
| ATOM 4157 | ND2 | ND2   | . ASN ASN ASN B B | 108 108 | . 74.852 | 118.813 | 11.647 | 1.00 |
| 4.23      | 1   | . . . |                   |         |          |         |        |      |
| ATOM 4158 | C   | C     | . ASN ASN ASN B B | 108 108 | . 71.509 | 116.515 | 10.012 | 1.00 |
| 3.85      | 1   | . . . |                   |         |          |         |        |      |
| ATOM 4159 | O   | O     | . ASN ASN ASN B B | 108 108 | . 71.412 | 115.335 | 10.326 | 1.00 |
| 6.50      | 1   | . . . |                   |         |          |         |        |      |
| ATOM 4160 | N   | N     | . ALA ALA ALA B B | 109 109 | . 70.607 | 117.431 | 10.396 | 1.00 |
| 3.84      | 1   | . . . |                   |         |          |         |        |      |
| ATOM 4161 | CA  | CA    | . ALA ALA ALA B B | 109 109 | . 69.362 | 117.094 | 11.115 | 1.00 |
| 4.47      | 1   | . . . |                   |         |          |         |        |      |
| ATOM 4162 | CB  | CB    | . ALA ALA ALA B B | 109 109 | . 68.688 | 118.370 | 11.576 | 1.00 |
| 5.43      | 1   | . . . |                   |         |          |         |        |      |
| ATOM 4163 | C   | C     | . ALA ALA ALA B B | 109 109 | . 68.404 | 116.328 | 10.188 | 1.00 |
| 5.10      | 1   | . . . |                   |         |          |         |        |      |
| ATOM 4164 | O   | O     | . ALA ALA ALA B B | 109 109 | . 67.901 | 115.222 | 10.556 | 1.00 |
| 3.13      | 1   | . . . |                   |         |          |         |        |      |
| ATOM 4165 | N   | N     | . ILE ILE ILE B B | 110 110 | . 68.185 | 116.861 | 8.972  | 1.00 |
| 5.16      | 1   | . . . |                   |         |          |         |        |      |
| ATOM 4166 | CA  | CA    | . ILE ILE ILE B B | 110 110 | . 67.208 | 116.223 | 8.161  | 1.00 |
| 5.67      | 1   | . . . |                   |         |          |         |        |      |
| ATOM 4167 | CB  | CB    | . ILE ILE ILE B B | 110 110 | . 66.838 | 117.097 | 6.941  | 1.00 |
| 5.42      | 1   | . . . |                   |         |          |         |        |      |
| ATOM 4168 | CG1 | CG1   | . ILE ILE ILE B B | 110 110 | . 66.230 | 118.431 | 7.399  | 1.00 |
| 7.42      | 1   | . . . |                   |         |          |         |        |      |
| ATOM 4169 | CD1 | CD1   | . ILE ILE ILE B B | 110 110 | . 65.784 | 119.331 | 6.240  | 1.00 |
| 10.52     | 1   | . . . |                   |         |          |         |        |      |
| ATOM 4170 | CG2 | CG2   | . ILE ILE ILE B B | 110 110 | . 65.948 | 116.340 | 5.970  | 1.00 |
| 6.13      | 1   | . . . |                   |         |          |         |        |      |
| ATOM 4171 | C   | C     | . ILE ILE ILE B B | 110 110 | . 67.718 | 114.800 | 7.762  | 1.00 |
| 3.76      | 1   | . . . |                   |         |          |         |        |      |
| ATOM 4172 | O   | O     | . ILE ILE ILE B B | 110 110 | . 66.969 | 113.823 | 7.649  | 1.00 |
| 3.89      | 1   | . . . |                   |         |          |         |        |      |
| ATOM 4173 | N   | N     | . LEU LEU LEU B B | 111 111 | . 68.999 | 114.746 | 7.421  | 1.00 |
| 3.48      | 1   | . . . |                   |         |          |         |        |      |

|           |       |     |                             |        |         |        |      |
|-----------|-------|-----|-----------------------------|--------|---------|--------|------|
| ATOM 4174 | CA    | CA  | . LEU LEU LEU B B 111 111 . | 69.504 | 113.502 | 6.857  | 1.00 |
| 4.19      | 1 . . |     |                             |        |         |        |      |
| ATOM 4175 | CB    | CB  | . LEU LEU LEU B B 111 111 . | 70.958 | 113.705 | 6.304  | 1.00 |
| 2.63      | 1 . . |     |                             |        |         |        |      |
| ATOM 4176 | CG    | CG  | . LEU LEU LEU B B 111 111 . | 71.494 | 112.401 | 5.705  | 1.00 |
| 3.59      | 1 . . |     |                             |        |         |        |      |
| ATOM 4177 | CD1   | CD1 | . LEU LEU LEU B B 111 111 . | 70.484 | 111.908 | 4.591  | 1.00 |
| 5.16      | 1 . . |     |                             |        |         |        |      |
| ATOM 4178 | CD2   | CD2 | . LEU LEU LEU B B 111 111 . | 72.902 | 112.590 | 5.212  | 1.00 |
| 4.14      | 1 . . |     |                             |        |         |        |      |
| ATOM 4179 | C     | C   | . LEU LEU LEU B B 111 111 . | 69.475 | 112.401 | 7.896  | 1.00 |
| 3.55      | 1 . . |     |                             |        |         |        |      |
| ATOM 4180 | O     | O   | . LEU LEU LEU B B 111 111 . | 69.112 | 111.266 | 7.570  | 1.00 |
| 4.19      | 1 . . |     |                             |        |         |        |      |
| ATOM 4181 | N     | N   | . GLY GLY GLY B B 112 112 . | 69.859 | 112.711 | 9.151  | 1.00 |
| 4.17      | 1 . . |     |                             |        |         |        |      |
| ATOM 4182 | CA    | CA  | . GLY GLY GLY B B 112 112 . | 69.846 | 111.642 | 10.150 | 1.00 |
| 3.96      | 1 . . |     |                             |        |         |        |      |
| ATOM 4183 | C     | C   | . GLY GLY GLY B B 112 112 . | 68.434 | 111.044 | 10.221 | 1.00 |
| 3.56      | 1 . . |     |                             |        |         |        |      |
| ATOM 4184 | O     | O   | . GLY GLY GLY B B 112 112 . | 68.214 | 109.818 | 10.343 | 1.00 |
| 3.94      | 1 . . |     |                             |        |         |        |      |
| ATOM 4185 | N     | N   | . VAL VAL VAL B B 113 113 . | 67.410 | 111.887 | 10.199 | 1.00 |
| 3.24      | 1 . . |     |                             |        |         |        |      |
| ATOM 4186 | CA    | CA  | . VAL VAL VAL B B 113 113 . | 66.064 | 111.289 | 10.186 | 1.00 |
| 3.25      | 1 . . |     |                             |        |         |        |      |
| ATOM 4187 | CB    | CB  | . VAL VAL VAL B B 113 113 . | 65.009 | 112.384 | 10.483 | 1.00 |
| 4.32      | 1 . . |     |                             |        |         |        |      |
| ATOM 4188 | CG1   | CG1 | . VAL VAL VAL B B 113 113 . | 63.635 | 111.818 | 10.452 | 1.00 |
| 3.90      | 1 . . |     |                             |        |         |        |      |
| ATOM 4189 | CG2   | CG2 | . VAL VAL VAL B B 113 113 . | 65.311 | 113.021 | 11.845 | 1.00 |
| 4.85      | 1 . . |     |                             |        |         |        |      |
| ATOM 4190 | C     | C   | . VAL VAL VAL B B 113 113 . | 65.712 | 110.485 | 8.891  | 1.00 |
| 3.81      | 1 . . |     |                             |        |         |        |      |
| ATOM 4191 | O     | O   | . VAL VAL VAL B B 113 113 . | 65.109 | 109.426 | 8.928  | 1.00 |
| 5.75      | 1 . . |     |                             |        |         |        |      |
| ATOM 4192 | N     | N   | . SER SER SER B B 114 114 . | 66.103 | 111.036 | 7.740  | 1.00 |
| 4.37      | 1 . . |     |                             |        |         |        |      |
| ATOM 4193 | CA    | CA  | . SER SER SER B B 114 114 . | 65.849 | 110.470 | 6.455  | 1.00 |
| 4.16      | 1 . . |     |                             |        |         |        |      |
| ATOM 4194 | CB    | CB  | . SER SER SER B B 114 114 . | 66.501 | 111.379 | 5.380  | 1.00 |
| 5.62      | 1 . . |     |                             |        |         |        |      |
| ATOM 4195 | OG    | OG  | . SER SER SER B B 114 114 . | 66.026 | 110.996 | 4.121  | 1.00 |
| 6.01      | 1 . . |     |                             |        |         |        |      |
| ATOM 4196 | C     | C   | . SER SER SER B B 114 114 . | 66.428 | 109.028 | 6.391  | 1.00 |
| 3.34      | 1 . . |     |                             |        |         |        |      |
| ATOM 4197 | O     | O   | . SER SER SER B B 114 114 . | 65.758 | 108.086 | 5.936  | 1.00 |
| 4.03      | 1 . . |     |                             |        |         |        |      |
| ATOM 4198 | N     | N   | . LEU LEU LEU B B 115 115 . | 67.648 | 108.899 | 6.899  | 1.00 |
| 4.10      | 1 . . |     |                             |        |         |        |      |
| ATOM 4199 | CA    | CA  | . LEU LEU LEU B B 115 115 . | 68.342 | 107.614 | 6.860  | 1.00 |
| 3.94      | 1 . . |     |                             |        |         |        |      |
| ATOM 4200 | CB    | CB  | . LEU LEU LEU B B 115 115 . | 69.817 | 107.765 | 7.284  | 1.00 |
| 4.79      | 1 . . |     |                             |        |         |        |      |





|           |       |    |                   |         |          |         |        |      |
|-----------|-------|----|-------------------|---------|----------|---------|--------|------|
| ATOM 4228 | CD    | CD | . LYS LYS LYS B B | 119 119 | . 69.488 | 102.374 | 9.073  | 1.00 |
| 9.20      | 1 . . |    |                   |         |          |         |        |      |
| ATOM 4229 | CE    | CE | . LYS LYS LYS B B | 119 119 | . 70.776 | 102.971 | 8.505  | 1.00 |
| 10.27     | 1 . . |    |                   |         |          |         |        |      |
| ATOM 4230 | NZ    | NZ | . LYS LYS LYS B B | 119 119 | . 71.992 | 103.025 | 9.403  | 1.00 |
| 11.11     | 1 . . |    |                   |         |          |         |        |      |
| ATOM 4231 | C     | C  | . LYS LYS LYS B B | 119 119 | . 64.642 | 101.044 | 8.023  | 1.00 |
| 8.31      | 1 . . |    |                   |         |          |         |        |      |
| ATOM 4232 | O     | O  | . LYS LYS LYS B B | 119 119 | . 64.366 | 99.844  | 7.861  | 1.00 |
| 8.43      | 1 . . |    |                   |         |          |         |        |      |
| ATOM 4233 | N     | N  | . ALA ALA ALA B B | 120 120 | . 63.805 | 101.904 | 8.606  | 1.00 |
| 9.86      | 1 . . |    |                   |         |          |         |        |      |
| ATOM 4234 | CA    | CA | . ALA ALA ALA B B | 120 120 | . 62.523 | 101.462 | 9.147  | 1.00 |
| 8.95      | 1 . . |    |                   |         |          |         |        |      |
| ATOM 4235 | CB    | CB | . ALA ALA ALA B B | 120 120 | . 61.912 | 102.589 | 10.042 | 1.00 |
| 9.28      | 1 . . |    |                   |         |          |         |        |      |
| ATOM 4236 | C     | C  | . ALA ALA ALA B B | 120 120 | . 61.590 | 101.048 | 8.025  | 1.00 |
| 10.07     | 1 . . |    |                   |         |          |         |        |      |
| ATOM 4237 | O     | O  | . ALA ALA ALA B B | 120 120 | . 60.743 | 100.123 | 8.186  | 1.00 |
| 12.09     | 1 . . |    |                   |         |          |         |        |      |
| ATOM 4238 | N     | N  | . GLY GLY GLY B B | 121 121 | . 61.710 | 101.728 | 6.863  | 1.00 |
| 8.15      | 1 . . |    |                   |         |          |         |        |      |
| ATOM 4239 | CA    | CA | . GLY GLY GLY B B | 121 121 | . 60.878 | 101.395 | 5.729  | 1.00 |
| 10.33     | 1 . . |    |                   |         |          |         |        |      |
| ATOM 4240 | C     | C  | . GLY GLY GLY B B | 121 121 | . 61.132 | 99.988  | 5.197  | 1.00 |
| 8.43      | 1 . . |    |                   |         |          |         |        |      |
| ATOM 4241 | O     | O  | . GLY GLY GLY B B | 121 121 | . 60.193 | 99.210  | 4.835  | 1.00 |
| 9.75      | 1 . . |    |                   |         |          |         |        |      |
| ATOM 4242 | N     | N  | . ALA ALA ALA B B | 122 122 | . 62.420 | 99.699  | 5.098  | 1.00 |
| 8.78      | 1 . . |    |                   |         |          |         |        |      |
| ATOM 4243 | CA    | CA | . ALA ALA ALA B B | 122 122 | . 62.871 | 98.404  | 4.707  | 1.00 |
| 10.09     | 1 . . |    |                   |         |          |         |        |      |
| ATOM 4244 | CB    | CB | . ALA ALA ALA B B | 122 122 | . 64.385 | 98.341  | 4.780  | 1.00 |
| 7.66      | 1 . . |    |                   |         |          |         |        |      |
| ATOM 4245 | C     | C  | . ALA ALA ALA B B | 122 122 | . 62.233 | 97.329  | 5.608  | 1.00 |
| 10.86     | 1 . . |    |                   |         |          |         |        |      |
| ATOM 4246 | O     | O  | . ALA ALA ALA B B | 122 122 | . 61.633 | 96.389  | 5.113  | 1.00 |
| 8.59      | 1 . . |    |                   |         |          |         |        |      |
| ATOM 4247 | N     | N  | . ALA ALA ALA B B | 123 123 | . 62.353 | 97.502  | 6.914  | 1.00 |
| 11.80     | 1 . . |    |                   |         |          |         |        |      |
| ATOM 4248 | CA    | CA | . ALA ALA ALA B B | 123 123 | . 61.752 | 96.539  | 7.809  | 1.00 |
| 11.62     | 1 . . |    |                   |         |          |         |        |      |
| ATOM 4249 | CB    | CB | . ALA ALA ALA B B | 123 123 | . 62.087 | 96.837  | 9.195  | 1.00 |
| 11.21     | 1 . . |    |                   |         |          |         |        |      |
| ATOM 4250 | C     | C  | . ALA ALA ALA B B | 123 123 | . 60.259 | 96.458  | 7.625  | 1.00 |
| 11.74     | 1 . . |    |                   |         |          |         |        |      |
| ATOM 4251 | O     | O  | . ALA ALA ALA B B | 123 123 | . 59.717 | 95.378  | 7.664  | 1.00 |
| 11.03     | 1 . . |    |                   |         |          |         |        |      |
| ATOM 4252 | N     | N  | . GLU GLU GLU B B | 124 124 | . 59.564 | 97.578  | 7.424  | 1.00 |
| 13.08     | 1 . . |    |                   |         |          |         |        |      |
| ATOM 4253 | CA    | CA | . GLU GLU GLU B B | 124 124 | . 58.136 | 97.486  | 7.304  | 1.00 |
| 15.87     | 1 . . |    |                   |         |          |         |        |      |
| ATOM 4254 | CB    | CB | . GLU GLU GLU B B | 124 124 | . 57.490 | 98.879  | 7.485  | 1.00 |
| 16.89     | 1 . . |    |                   |         |          |         |        |      |

|           |       |     |                   |         |          |         |        |      |
|-----------|-------|-----|-------------------|---------|----------|---------|--------|------|
| ATOM 4255 | CG    | CG  | . GLU GLU GLU B B | 124 124 | . 55.980 | 98.952  | 7.271  | 1.00 |
| 20.08     | 1 . . |     |                   |         |          |         |        |      |
| ATOM 4256 | CD    | CD  | . GLU GLU GLU B B | 124 124 | . 55.141 | 98.067  | 8.192  | 1.00 |
| 25.24     | 1 . . |     |                   |         |          |         |        |      |
| ATOM 4257 | OE1   | OE1 | . GLU GLU GLU B B | 124 124 | . 53.917 | 98.020  | 7.964  | 1.00 |
| 30.77     | 1 . . |     |                   |         |          |         |        |      |
| ATOM 4258 | OE2   | OE2 | . GLU GLU GLU B B | 124 124 | . 55.660 | 97.433  | 9.140  | 1.00 |
| 26.92     | 1 . . |     |                   |         |          |         |        |      |
| ATOM 4259 | C     | C   | . GLU GLU GLU B B | 124 124 | . 57.760 | 96.769  | 5.991  | 1.00 |
| 15.89     | 1 . . |     |                   |         |          |         |        |      |
| ATOM 4260 | O     | O   | . GLU GLU GLU B B | 124 124 | . 56.705 | 96.139  | 5.917  | 1.00 |
| 18.31     | 1 . . |     |                   |         |          |         |        |      |
| ATOM 4261 | N     | N   | . ARG ARG ARG B B | 125 125 | . 58.644 | 96.824  | 4.981  | 1.00 |
| 17.06     | 1 . . |     |                   |         |          |         |        |      |
| ATOM 4262 | CA    | CA  | . ARG ARG ARG B B | 125 125 | . 58.495 | 96.093  | 3.717  | 1.00 |
| 16.32     | 1 . . |     |                   |         |          |         |        |      |
| ATOM 4263 | CB    | CB  | . ARG ARG ARG B B | 125 125 | . 59.284 | 96.793  | 2.574  | 1.00 |
| 16.99     | 1 . . |     |                   |         |          |         |        |      |
| ATOM 4264 | CG    | CG  | . ARG ARG ARG B B | 125 125 | . 58.770 | 98.190  | 2.144  | 1.00 |
| 17.95     | 1 . . |     |                   |         |          |         |        |      |
| ATOM 4265 | CD    | CD  | . ARG ARG ARG B B | 125 125 | . 57.360 | 98.173  | 1.561  | 1.00 |
| 20.25     | 1 . . |     |                   |         |          |         |        |      |
| ATOM 4266 | NE    | NE  | . ARG ARG ARG B B | 125 125 | . 57.069 | 99.377  | 0.789  | 1.00 |
| 22.94     | 1 . . |     |                   |         |          |         |        |      |
| ATOM 4267 | CZ    | CZ  | . ARG ARG ARG B B | 125 125 | . 55.844 | 99.781  | 0.439  | 1.00 |
| 24.76     | 1 . . |     |                   |         |          |         |        |      |
| ATOM 4268 | NH1   | NH1 | . ARG ARG ARG B B | 125 125 | . 54.782 | 99.089  | 0.797  | 1.00 |
| 24.90     | 1 . . |     |                   |         |          |         |        |      |
| ATOM 4269 | NH2   | NH2 | . ARG ARG ARG B B | 125 125 | . 55.669 | 100.902 | -0.274 | 1.00 |
| 26.67     | 1 . . |     |                   |         |          |         |        |      |
| ATOM 4270 | C     | C   | . ARG ARG ARG B B | 125 125 | . 58.947 | 94.618  | 3.842  | 1.00 |
| 17.22     | 1 . . |     |                   |         |          |         |        |      |
| ATOM 4271 | O     | O   | . ARG ARG ARG B B | 125 125 | . 58.729 | 93.808  | 2.910  | 1.00 |
| 18.62     | 1 . . |     |                   |         |          |         |        |      |
| ATOM 4272 | N     | N   | . GLU GLU GLU B B | 126 126 | . 59.553 | 94.264  | 4.976  | 1.00 |
| 16.29     | 1 . . |     |                   |         |          |         |        |      |
| ATOM 4273 | CA    | CA  | . GLU GLU GLU B B | 126 126 | . 60.179 | 92.950  | 5.159  | 1.00 |
| 16.99     | 1 . . |     |                   |         |          |         |        |      |
| ATOM 4274 | CB    | CB  | . GLU GLU GLU B B | 126 126 | . 59.149 | 91.811  | 5.313  | 1.00 |
| 18.62     | 1 . . |     |                   |         |          |         |        |      |
| ATOM 4275 | CG    | CG  | . GLU GLU GLU B B | 126 126 | . 58.350 | 91.792  | 6.603  | 1.00 |
| 21.87     | 1 . . |     |                   |         |          |         |        |      |
| ATOM 4276 | CD    | CD  | . GLU GLU GLU B B | 126 126 | . 57.384 | 90.592  | 6.681  | 1.00 |
| 26.30     | 1 . . |     |                   |         |          |         |        |      |
| ATOM 4277 | OE1   | OE1 | . GLU GLU GLU B B | 126 126 | . 57.642 | 89.651  | 7.467  | 1.00 |
| 29.79     | 1 . . |     |                   |         |          |         |        |      |
| ATOM 4278 | OE2   | OE2 | . GLU GLU GLU B B | 126 126 | . 56.363 | 90.583  | 5.951  | 1.00 |
| 27.74     | 1 . . |     |                   |         |          |         |        |      |
| ATOM 4279 | C     | C   | . GLU GLU GLU B B | 126 126 | . 61.112 | 92.673  | 3.983  | 1.00 |
| 15.50     | 1 . . |     |                   |         |          |         |        |      |
| ATOM 4280 | O     | O   | . GLU GLU GLU B B | 126 126 | . 60.992 | 91.660  | 3.289  | 1.00 |
| 17.33     | 1 . . |     |                   |         |          |         |        |      |
| ATOM 4281 | N     | N   | . LEU LEU LEU B B | 127 127 | . 62.039 | 93.600  | 3.762  | 1.00 |
| 13.48     | 1 . . |     |                   |         |          |         |        |      |

|           |       |     |                   |         |          |         |        |      |
|-----------|-------|-----|-------------------|---------|----------|---------|--------|------|
| ATOM 4282 | CA    | CA  | . LEU LEU LEU B B | 127 127 | . 63.103 | 93.483  | 2.778  | 1.00 |
| 11.43     | 1 . . |     |                   |         |          |         |        |      |
| ATOM 4283 | CB    | CB  | . LEU LEU LEU B B | 127 127 | . 62.875 | 94.444  | 1.582  | 1.00 |
| 12.05     | 1 . . |     |                   |         |          |         |        |      |
| ATOM 4284 | CG    | CG  | . LEU LEU LEU B B | 127 127 | . 61.589 | 94.221  | 0.806  | 1.00 |
| 12.98     | 1 . . |     |                   |         |          |         |        |      |
| ATOM 4285 | CD1   | CD1 | . LEU LEU LEU B B | 127 127 | . 61.407 | 95.429  | -0.077 | 1.00 |
| 10.88     | 1 . . |     |                   |         |          |         |        |      |
| ATOM 4286 | CD2   | CD2 | . LEU LEU LEU B B | 127 127 | . 61.642 | 92.942  | -0.005 | 1.00 |
| 14.25     | 1 . . |     |                   |         |          |         |        |      |
| ATOM 4287 | C     | C   | . LEU LEU LEU B B | 127 127 | . 64.395 | 93.925  | 3.431  | 1.00 |
| 9.42      | 1 . . |     |                   |         |          |         |        |      |
| ATOM 4288 | O     | O   | . LEU LEU LEU B B | 127 127 | . 64.403 | 94.841  | 4.251  | 1.00 |
| 9.34      | 1 . . |     |                   |         |          |         |        |      |
| ATOM 4289 | N     | N   | . PRO PRO PRO B B | 128 128 | . 65.504 | 93.374  | 2.961  | 1.00 |
| 9.02      | 1 . . |     |                   |         |          |         |        |      |
| ATOM 4290 | CA    | CA  | . PRO PRO PRO B B | 128 128 | . 66.751 | 94.022  | 3.324  | 1.00 |
| 8.27      | 1 . . |     |                   |         |          |         |        |      |
| ATOM 4291 | CB    | CB  | . PRO PRO PRO B B | 128 128 | . 67.819 | 93.224  | 2.616  | 1.00 |
| 7.97      | 1 . . |     |                   |         |          |         |        |      |
| ATOM 4292 | CG    | CG  | . PRO PRO PRO B B | 128 128 | . 67.151 | 92.152  | 1.916  | 1.00 |
| 12.37     | 1 . . |     |                   |         |          |         |        |      |
| ATOM 4293 | CD    | CD  | . PRO PRO PRO B B | 128 128 | . 65.682 | 92.268  | 2.009  | 1.00 |
| 10.21     | 1 . . |     |                   |         |          |         |        |      |
| ATOM 4294 | C     | C   | . PRO PRO PRO B B | 128 128 | . 66.851 | 95.450  | 2.799  | 1.00 |
| 7.06      | 1 . . |     |                   |         |          |         |        |      |
| ATOM 4295 | O     | O   | . PRO PRO PRO B B | 128 128 | . 66.186 | 95.814  | 1.801  | 1.00 |
| 7.85      | 1 . . |     |                   |         |          |         |        |      |
| ATOM 4296 | N     | N   | . LEU LEU LEU B B | 129 129 | . 67.692 | 96.242  | 3.446  | 1.00 |
| 7.15      | 1 . . |     |                   |         |          |         |        |      |
| ATOM 4297 | CA    | CA  | . LEU LEU LEU B B | 129 129 | . 67.775 | 97.665  | 3.130  | 1.00 |
| 6.03      | 1 . . |     |                   |         |          |         |        |      |
| ATOM 4298 | CB    | CB  | . LEU LEU LEU B B | 129 129 | . 68.761 | 98.403  | 4.043  | 1.00 |
| 5.46      | 1 . . |     |                   |         |          |         |        |      |
| ATOM 4299 | CG    | CG  | . LEU LEU LEU B B | 129 129 | . 69.001 | 99.866  | 3.777  | 1.00 |
| 6.20      | 1 . . |     |                   |         |          |         |        |      |
| ATOM 4300 | CD1   | CD1 | . LEU LEU LEU B B | 129 129 | . 67.751 | 100.740 | 3.832  | 1.00 |
| 7.10      | 1 . . |     |                   |         |          |         |        |      |
| ATOM 4301 | CD2   | CD2 | . LEU LEU LEU B B | 129 129 | . 70.039 | 100.424 | 4.710  | 1.00 |
| 5.46      | 1 . . |     |                   |         |          |         |        |      |
| ATOM 4302 | C     | C   | . LEU LEU LEU B B | 129 129 | . 68.155 | 97.867  | 1.659  | 1.00 |
| 6.31      | 1 . . |     |                   |         |          |         |        |      |
| ATOM 4303 | O     | O   | . LEU LEU LEU B B | 129 129 | . 67.488 | 98.639  | 0.952  | 1.00 |
| 8.62      | 1 . . |     |                   |         |          |         |        |      |
| ATOM 4304 | N     | N   | . TYR TYR TYR B B | 130 130 | . 69.189 | 97.149  | 1.159  | 1.00 |
| 5.60      | 1 . . |     |                   |         |          |         |        |      |
| ATOM 4305 | CA    | CA  | . TYR TYR TYR B B | 130 130 | . 69.549 | 97.336  | -0.319 | 1.00 |
| 6.28      | 1 . . |     |                   |         |          |         |        |      |
| ATOM 4306 | CB    | CB  | . TYR TYR TYR B B | 130 130 | . 70.775 | 96.509  | -0.731 | 1.00 |
| 6.23      | 1 . . |     |                   |         |          |         |        |      |
| ATOM 4307 | CG    | CG  | . TYR TYR TYR B B | 130 130 | . 70.640 | 95.041  | -0.586 | 1.00 |
| 6.48      | 1 . . |     |                   |         |          |         |        |      |
| ATOM 4308 | CD1   | CD1 | . TYR TYR TYR B B | 130 130 | . 70.152 | 94.264  | -1.661 | 1.00 |
| 6.51      | 1 . . |     |                   |         |          |         |        |      |

|           |       |     |                             |        |         |        |      |
|-----------|-------|-----|-----------------------------|--------|---------|--------|------|
| ATOM 4309 | CE1   | CE1 | . TYR TYR TYR B B 130 130 . | 69.975 | 92.877  | -1.552 | 1.00 |
| 9.33      | 1 . . |     |                             |        |         |        |      |
| ATOM 4310 | CZ    | CZ  | . TYR TYR TYR B B 130 130 . | 70.357 | 92.245  | -0.324 | 1.00 |
| 8.69      | 1 . . |     |                             |        |         |        |      |
| ATOM 4311 | OH    | OH  | . TYR TYR TYR B B 130 130 . | 70.211 | 90.868  | -0.258 | 1.00 |
| 13.01     | 1 . . |     |                             |        |         |        |      |
| ATOM 4312 | CE2   | CE2 | . TYR TYR TYR B B 130 130 . | 70.894 | 92.984  | 0.751  | 1.00 |
| 9.07      | 1 . . |     |                             |        |         |        |      |
| ATOM 4313 | CD2   | CD2 | . TYR TYR TYR B B 130 130 . | 71.023 | 94.417  | 0.603  | 1.00 |
| 8.03      | 1 . . |     |                             |        |         |        |      |
| ATOM 4314 | C     | C   | . TYR TYR TYR B B 130 130 . | 68.363 | 97.064  | -1.295 | 1.00 |
| 6.52      | 1 . . |     |                             |        |         |        |      |
| ATOM 4315 | O     | O   | . TYR TYR TYR B B 130 130 . | 68.223 | 97.711  | -2.391 | 1.00 |
| 9.25      | 1 . . |     |                             |        |         |        |      |
| ATOM 4316 | N     | N   | . ARG ARG ARG B B 131 131 . | 67.471 | 96.137  | -0.915 | 1.00 |
| 7.87      | 1 . . |     |                             |        |         |        |      |
| ATOM 4317 | CA    | CA  | . ARG ARG ARG B B 131 131 . | 66.262 | 95.846  | -1.730 | 1.00 |
| 9.18      | 1 . . |     |                             |        |         |        |      |
| ATOM 4318 | CB    | CB  | . ARG ARG ARG B B 131 131 . | 65.621 | 94.484  | -1.477 | 1.00 |
| 10.01     | 1 . . |     |                             |        |         |        |      |
| ATOM 4319 | CG    | CG  | . ARG ARG ARG B B 131 131 . | 66.548 | 93.327  | -1.822 | 1.00 |
| 16.60     | 1 . . |     |                             |        |         |        |      |
| ATOM 4320 | CD    | CD  | . ARG ARG ARG B B 131 131 . | 65.727 | 92.234  | -2.527 | 1.00 |
| 25.12     | 1 . . |     |                             |        |         |        |      |
| ATOM 4321 | NE    | NE  | . ARG ARG ARG B B 131 131 . | 66.481 | 90.998  | -2.765 | 1.00 |
| 31.36     | 1 . . |     |                             |        |         |        |      |
| ATOM 4322 | CZ    | CZ  | . ARG ARG ARG B B 131 131 . | 67.026 | 90.640  | -3.933 | 1.00 |
| 34.74     | 1 . . |     |                             |        |         |        |      |
| ATOM 4323 | NH1   | NH1 | . ARG ARG ARG B B 131 131 . | 67.667 | 89.485  | -4.026 | 1.00 |
| 34.86     | 1 . . |     |                             |        |         |        |      |
| ATOM 4324 | NH2   | NH2 | . ARG ARG ARG B B 131 131 . | 66.940 | 91.425  | -5.011 | 1.00 |
| 35.64     | 1 . . |     |                             |        |         |        |      |
| ATOM 4325 | C     | C   | . ARG ARG ARG B B 131 131 . | 65.205 | 96.885  | -1.615 | 1.00 |
| 8.01      | 1 . . |     |                             |        |         |        |      |
| ATOM 4326 | O     | O   | . ARG ARG ARG B B 131 131 . | 64.593 | 97.258  | -2.617 | 1.00 |
| 10.45     | 1 . . |     |                             |        |         |        |      |
| ATOM 4327 | N     | N   | . HIS HIS HIS B B 132 132 . | 64.984 | 97.383  | -0.408 | 1.00 |
| 7.10      | 1 . . |     |                             |        |         |        |      |
| ATOM 4328 | CA    | CA  | . HIS HIS HIS B B 132 132 . | 64.090 | 98.508  | -0.254 | 1.00 |
| 8.19      | 1 . . |     |                             |        |         |        |      |
| ATOM 4329 | CB    | CB  | . HIS HIS HIS B B 132 132 . | 63.969 | 98.899  | 1.195  | 1.00 |
| 9.21      | 1 . . |     |                             |        |         |        |      |
| ATOM 4330 | CG    | CG  | . HIS HIS HIS B B 132 132 . | 63.001 | 100.022 | 1.445  | 1.00 |
| 8.62      | 1 . . |     |                             |        |         |        |      |
| ATOM 4331 | ND1   | ND1 | . HIS HIS HIS B B 132 132 . | 61.731 | 100.079 | 0.882  | 1.00 |
| 7.48      | 1 . . |     |                             |        |         |        |      |
| ATOM 4332 | CE1   | CE1 | . HIS HIS HIS B B 132 132 . | 61.110 | 101.150 | 1.335  | 1.00 |
| 8.83      | 1 . . |     |                             |        |         |        |      |
| ATOM 4333 | NE2   | NE2 | . HIS HIS HIS B B 132 132 . | 61.904 | 101.779 | 2.182  | 1.00 |
| 5.55      | 1 . . |     |                             |        |         |        |      |
| ATOM 4334 | CD2   | CD2 | . HIS HIS HIS B B 132 132 . | 63.088 | 101.076 | 2.284  | 1.00 |
| 9.28      | 1 . . |     |                             |        |         |        |      |
| ATOM 4335 | C     | C   | . HIS HIS HIS B B 132 132 . | 64.509 | 99.731  | -1.110 | 1.00 |
| 8.06      | 1 . . |     |                             |        |         |        |      |

|           |       |     |                             |        |         |        |      |
|-----------|-------|-----|-----------------------------|--------|---------|--------|------|
| ATOM 4336 | O     | O   | . HIS HIS HIS B B 132 132 . | 63.674 | 100.359 | -1.725 | 1.00 |
| 10.11     | 1 . . |     |                             |        |         |        |      |
| ATOM 4337 | N     | N   | . ILE ILE ILE B B 133 133 . | 65.783 | 100.107 | -1.050 | 1.00 |
| 8.93      | 1 . . |     |                             |        |         |        |      |
| ATOM 4338 | CA    | CA  | . ILE ILE ILE B B 133 133 . | 66.340 | 101.206 | -1.814 | 1.00 |
| 6.40      | 1 . . |     |                             |        |         |        |      |
| ATOM 4339 | CB    | CB  | . ILE ILE ILE B B 133 133 . | 67.808 | 101.420 | -1.423 | 1.00 |
| 6.33      | 1 . . |     |                             |        |         |        |      |
| ATOM 4340 | CG1   | CG1 | . ILE ILE ILE B B 133 133 . | 67.879 | 102.014 | 0.007  | 1.00 |
| 5.76      | 1 . . |     |                             |        |         |        |      |
| ATOM 4341 | CD1   | CD1 | . ILE ILE ILE B B 133 133 . | 69.356 | 102.155 | 0.614  | 1.00 |
| 5.39      | 1 . . |     |                             |        |         |        |      |
| ATOM 4342 | CG2   | CG2 | . ILE ILE ILE B B 133 133 . | 68.551 | 102.316 | -2.464 | 1.00 |
| 4.54      | 1 . . |     |                             |        |         |        |      |
| ATOM 4343 | C     | C   | . ILE ILE ILE B B 133 133 . | 66.177 | 100.911 | -3.309 | 1.00 |
| 6.78      | 1 . . |     |                             |        |         |        |      |
| ATOM 4344 | O     | O   | . ILE ILE ILE B B 133 133 . | 65.717 | 101.773 | -4.088 | 1.00 |
| 7.07      | 1 . . |     |                             |        |         |        |      |
| ATOM 4345 | N     | N   | . ALA ALA ALA B B 134 134 . | 66.535 | 99.692  | -3.744 | 1.00 |
| 7.01      | 1 . . |     |                             |        |         |        |      |
| ATOM 4346 | CA    | CA  | . ALA ALA ALA B B 134 134 . | 66.304 | 99.319  | -5.135 | 1.00 |
| 9.05      | 1 . . |     |                             |        |         |        |      |
| ATOM 4347 | CB    | CB  | . ALA ALA ALA B B 134 134 . | 66.621 | 97.834  | -5.404 | 1.00 |
| 10.10     | 1 . . |     |                             |        |         |        |      |
| ATOM 4348 | C     | C   | . ALA ALA ALA B B 134 134 . | 64.867 | 99.626  | -5.562 | 1.00 |
| 10.31     | 1 . . |     |                             |        |         |        |      |
| ATOM 4349 | O     | O   | . ALA ALA ALA B B 134 134 . | 64.589 | 100.191 | -6.646 | 1.00 |
| 9.51      | 1 . . |     |                             |        |         |        |      |
| ATOM 4350 | N     | N   | . GLN GLN GLN B B 135 135 . | 63.921 | 99.246  | -4.733 | 1.00 |
| 11.87     | 1 . . |     |                             |        |         |        |      |
| ATOM 4351 | CA    | CA  | . GLN GLN GLN B B 135 135 . | 62.536 | 99.550  | -5.107 | 1.00 |
| 11.80     | 1 . . |     |                             |        |         |        |      |
| ATOM 4352 | CB    | CB  | . GLN GLN GLN B B 135 135 . | 61.550 | 98.717  | -4.294 | 1.00 |
| 12.73     | 1 . . |     |                             |        |         |        |      |
| ATOM 4353 | CG    | CG  | . GLN GLN GLN B B 135 135 . | 61.739 | 97.224  | -4.458 | 1.00 |
| 13.31     | 1 . . |     |                             |        |         |        |      |
| ATOM 4354 | CD    | CD  | . GLN GLN GLN B B 135 135 . | 60.746 | 96.391  | -3.607 | 1.00 |
| 21.03     | 1 . . |     |                             |        |         |        |      |
| ATOM 4355 | OE1   | OE1 | . GLN GLN GLN B B 135 135 . | 59.943 | 96.920  | -2.828 | 1.00 |
| 23.07     | 1 . . |     |                             |        |         |        |      |
| ATOM 4356 | NE2   | NE2 | . GLN GLN GLN B B 135 135 . | 60.782 | 95.090  | -3.795 | 1.00 |
| 23.87     | 1 . . |     |                             |        |         |        |      |
| ATOM 4357 | C     | C   | . GLN GLN GLN B B 135 135 . | 62.183 | 101.054 | -5.058 | 1.00 |
| 11.68     | 1 . . |     |                             |        |         |        |      |
| ATOM 4358 | O     | O   | . GLN GLN GLN B B 135 135 . | 61.398 | 101.547 | -5.907 | 1.00 |
| 12.11     | 1 . . |     |                             |        |         |        |      |
| ATOM 4359 | N     | N   | . LEU LEU LEU B B 136 136 . | 62.720 | 101.795 | -4.094 | 1.00 |
| 11.15     | 1 . . |     |                             |        |         |        |      |
| ATOM 4360 | CA    | CA  | . LEU LEU LEU B B 136 136 . | 62.552 | 103.261 | -4.049 | 1.00 |
| 12.06     | 1 . . |     |                             |        |         |        |      |
| ATOM 4361 | CB    | CB  | . LEU LEU LEU B B 136 136 . | 63.243 | 103.872 | -2.851 | 1.00 |
| 12.75     | 1 . . |     |                             |        |         |        |      |
| ATOM 4362 | CG    | CG  | . LEU LEU LEU B B 136 136 . | 62.536 | 103.677 | -1.501 | 1.00 |
| 13.56     | 1 . . |     |                             |        |         |        |      |

|           |     |       |                   |         |          |         |         |      |
|-----------|-----|-------|-------------------|---------|----------|---------|---------|------|
| ATOM 4363 | CD1 | CD1   | . LEU LEU LEU B B | 136 136 | . 63.449 | 104.183 | -0.392  | 1.00 |
| 13.62     | 1   | . . . |                   |         |          |         |         |      |
| ATOM 4364 | CD2 | CD2   | . LEU LEU LEU B B | 136 136 | . 61.100 | 104.304 | -1.442  | 1.00 |
| 13.43     | 1   | . . . |                   |         |          |         |         |      |
| ATOM 4365 | C   | C     | . LEU LEU LEU B B | 136 136 | . 63.108 | 103.892 | -5.304  | 1.00 |
| 11.32     | 1   | . . . |                   |         |          |         |         |      |
| ATOM 4366 | O   | O     | . LEU LEU LEU B B | 136 136 | . 62.640 | 104.976 | -5.718  | 1.00 |
| 13.89     | 1   | . . . |                   |         |          |         |         |      |
| ATOM 4367 | N   | N     | . ALA ALA ALA B B | 137 137 | . 64.099 | 103.223 | -5.906  | 1.00 |
| 10.95     | 1   | . . . |                   |         |          |         |         |      |
| ATOM 4368 | CA  | CA    | . ALA ALA ALA B B | 137 137 | . 64.780 | 103.741 | -7.110  | 1.00 |
| 11.49     | 1   | . . . |                   |         |          |         |         |      |
| ATOM 4369 | CB  | CB    | . ALA ALA ALA B B | 137 137 | . 66.252 | 103.466 | -7.069  | 1.00 |
| 10.84     | 1   | . . . |                   |         |          |         |         |      |
| ATOM 4370 | C   | C     | . ALA ALA ALA B B | 137 137 | . 64.230 | 103.189 | -8.413  | 1.00 |
| 11.68     | 1   | . . . |                   |         |          |         |         |      |
| ATOM 4371 | O   | O     | . ALA ALA ALA B B | 137 137 | . 64.625 | 103.651 | -9.459  | 1.00 |
| 12.40     | 1   | . . . |                   |         |          |         |         |      |
| ATOM 4372 | N   | N     | . GLY GLY GLY B B | 138 138 | . 63.356 | 102.182 | -8.336  | 1.00 |
| 12.95     | 1   | . . . |                   |         |          |         |         |      |
| ATOM 4373 | CA  | CA    | . GLY GLY GLY B B | 138 138 | . 62.772 | 101.563 | -9.519  | 1.00 |
| 15.22     | 1   | . . . |                   |         |          |         |         |      |
| ATOM 4374 | C   | C     | . GLY GLY GLY B B | 138 138 | . 63.720 | 100.602 | -10.163 | 1.00 |
| 16.68     | 1   | . . . |                   |         |          |         |         |      |
| ATOM 4375 | O   | O     | . GLY GLY GLY B B | 138 138 | . 63.659 | 100.420 | -11.380 | 1.00 |
| 15.91     | 1   | . . . |                   |         |          |         |         |      |
| ATOM 4376 | N   | N     | . ASN ASN ASN B B | 139 139 | . 64.646 | 100.010 | -9.394  | 1.00 |
| 16.91     | 1   | . . . |                   |         |          |         |         |      |
| ATOM 4377 | CA  | CA    | . ASN ASN ASN B B | 139 139 | . 65.579 | 99.064  | -10.000 | 1.00 |
| 19.01     | 1   | . . . |                   |         |          |         |         |      |
| ATOM 4378 | CB  | CB    | . ASN ASN ASN B B | 139 139 | . 67.008 | 99.241  | -9.493  | 1.00 |
| 18.85     | 1   | . . . |                   |         |          |         |         |      |
| ATOM 4379 | CG  | CG    | . ASN ASN ASN B B | 139 139 | . 67.604 | 100.567 | -9.889  | 1.00 |
| 18.88     | 1   | . . . |                   |         |          |         |         |      |
| ATOM 4380 | OD1 | OD1   | . ASN ASN ASN B B | 139 139 | . 67.362 | 101.060 | -11.024 | 1.00 |
| 24.83     | 1   | . . . |                   |         |          |         |         |      |
| ATOM 4381 | ND2 | ND2   | . ASN ASN ASN B B | 139 139 | . 68.355 | 101.200 | -8.954  | 1.00 |
| 14.52     | 1   | . . . |                   |         |          |         |         |      |
| ATOM 4382 | C   | C     | . ASN ASN ASN B B | 139 139 | . 65.142 | 97.656  | -9.716  | 1.00 |
| 20.42     | 1   | . . . |                   |         |          |         |         |      |
| ATOM 4383 | O   | O     | . ASN ASN ASN B B | 139 139 | . 64.588 | 97.383  | -8.664  | 1.00 |
| 20.12     | 1   | . . . |                   |         |          |         |         |      |
| ATOM 4384 | N   | N     | . SER SER SER B B | 140 140 | . 65.441 | 96.759  | -10.650 | 1.00 |
| 23.79     | 1   | . . . |                   |         |          |         |         |      |
| ATOM 4385 | CA  | CA    | . SER SER SER B B | 140 140 | . 64.860 | 95.400  | -10.686 | 1.00 |
| 27.08     | 1   | . . . |                   |         |          |         |         |      |
| ATOM 4386 | CB  | CB    | . SER SER SER B B | 140 140 | . 63.887 | 95.284  | -11.854 | 1.00 |
| 27.47     | 1   | . . . |                   |         |          |         |         |      |
| ATOM 4387 | OG  | OG    | . SER SER SER B B | 140 140 | . 62.621 | 95.822  | -11.526 | 1.00 |
| 28.28     | 1   | . . . |                   |         |          |         |         |      |
| ATOM 4388 | C   | C     | . SER SER SER B B | 140 140 | . 65.982 | 94.430  | -10.922 | 1.00 |
| 28.71     | 1   | . . . |                   |         |          |         |         |      |
| ATOM 4389 | O   | O     | . SER SER SER B B | 140 140 | . 65.786 | 93.374  | -11.533 | 1.00 |
| 29.61     | 1   | . . . |                   |         |          |         |         |      |

|           |       |     |                   |         |          |        |         |      |
|-----------|-------|-----|-------------------|---------|----------|--------|---------|------|
| ATOM 4390 | N     | N   | . ASP ASP ASP B B | 141 141 | . 67.161 | 94.838 | -10.460 | 1.00 |
| 29.26     | 1 . . |     |                   |         |          |        |         |      |
| ATOM 4391 | CA    | CA  | . ASP ASP ASP B B | 141 141 | . 68.395 | 94.092 | -10.537 | 1.00 |
| 29.22     | 1 . . |     |                   |         |          |        |         |      |
| ATOM 4392 | CB    | CB  | . ASP ASP ASP B B | 141 141 | . 69.020 | 94.244 | -11.921 | 1.00 |
| 30.65     | 1 . . |     |                   |         |          |        |         |      |
| ATOM 4393 | CG    | CG  | . ASP ASP ASP B B | 141 141 | . 69.717 | 95.582 | -12.106 | 1.00 |
| 34.14     | 1 . . |     |                   |         |          |        |         |      |
| ATOM 4394 | OD1   | OD1 | . ASP ASP ASP B B | 141 141 | . 70.965 | 95.640 | -11.915 | 1.00 |
| 38.04     | 1 . . |     |                   |         |          |        |         |      |
| ATOM 4395 | OD2   | OD2 | . ASP ASP ASP B B | 141 141 | . 69.014 | 96.579 | -12.429 | 1.00 |
| 36.10     | 1 . . |     |                   |         |          |        |         |      |
| ATOM 4396 | C     | C   | . ASP ASP ASP B B | 141 141 | . 69.303 | 94.731 | -9.481  | 1.00 |
| 27.57     | 1 . . |     |                   |         |          |        |         |      |
| ATOM 4397 | O     | O   | . ASP ASP ASP B B | 141 141 | . 68.967 | 95.796 | -8.927  | 1.00 |
| 28.79     | 1 . . |     |                   |         |          |        |         |      |
| ATOM 4398 | N     | N   | . LEU LEU LEU B B | 142 142 | . 70.439 | 94.099 | -9.199  | 1.00 |
| 24.38     | 1 . . |     |                   |         |          |        |         |      |
| ATOM 4399 | CA    | CA  | . LEU LEU LEU B B | 142 142 | . 71.383 | 94.601 | -8.207  | 1.00 |
| 20.30     | 1 . . |     |                   |         |          |        |         |      |
| ATOM 4400 | CB    | CB  | . LEU LEU LEU B B | 142 142 | . 71.181 | 93.905 | -6.875  | 1.00 |
| 20.42     | 1 . . |     |                   |         |          |        |         |      |
| ATOM 4401 | CG    | CG  | . LEU LEU LEU B B | 142 142 | . 69.822 | 93.908 | -6.242  | 1.00 |
| 18.91     | 1 . . |     |                   |         |          |        |         |      |
| ATOM 4402 | CD1   | CD1 | . LEU LEU LEU B B | 142 142 | . 69.795 | 92.747 | -5.291  | 1.00 |
| 19.75     | 1 . . |     |                   |         |          |        |         |      |
| ATOM 4403 | CD2   | CD2 | . LEU LEU LEU B B | 142 142 | . 69.656 | 95.234 | -5.476  | 1.00 |
| 12.14     | 1 . . |     |                   |         |          |        |         |      |
| ATOM 4404 | C     | C   | . LEU LEU LEU B B | 142 142 | . 72.752 | 94.243 | -8.676  | 1.00 |
| 18.47     | 1 . . |     |                   |         |          |        |         |      |
| ATOM 4405 | O     | O   | . LEU LEU LEU B B | 142 142 | . 72.917 | 93.270 | -9.402  | 1.00 |
| 18.48     | 1 . . |     |                   |         |          |        |         |      |
| ATOM 4406 | N     | N   | . ILE ILE ILE B B | 143 143 | . 73.742 | 95.016 | -8.276  | 1.00 |
| 15.58     | 1 . . |     |                   |         |          |        |         |      |
| ATOM 4407 | CA    | CA  | . ILE ILE ILE B B | 143 143 | . 75.086 | 94.664 | -8.600  | 1.00 |
| 13.24     | 1 . . |     |                   |         |          |        |         |      |
| ATOM 4408 | CB    | CB  | . ILE ILE ILE B B | 143 143 | . 75.429 | 95.138 | -10.047 | 1.00 |
| 14.73     | 1 . . |     |                   |         |          |        |         |      |
| ATOM 4409 | CG1   | CG1 | . ILE ILE ILE B B | 143 143 | . 76.844 | 94.756 | -10.506 | 1.00 |
| 16.69     | 1 . . |     |                   |         |          |        |         |      |
| ATOM 4410 | CD1   | CD1 | . ILE ILE ILE B B | 143 143 | . 77.011 | 94.748 | -12.068 | 1.00 |
| 19.67     | 1 . . |     |                   |         |          |        |         |      |
| ATOM 4411 | CG2   | CG2 | . ILE ILE ILE B B | 143 143 | . 75.142 | 96.543 | -10.202 | 1.00 |
| 13.59     | 1 . . |     |                   |         |          |        |         |      |
| ATOM 4412 | C     | C   | . ILE ILE ILE B B | 143 143 | . 76.025 | 95.180 | -7.523  | 1.00 |
| 10.56     | 1 . . |     |                   |         |          |        |         |      |
| ATOM 4413 | O     | O   | . ILE ILE ILE B B | 143 143 | . 75.810 | 96.259 | -6.951  | 1.00 |
| 7.93      | 1 . . |     |                   |         |          |        |         |      |
| ATOM 4414 | N     | N   | . LEU LEU LEU B B | 144 144 | . 77.032 | 94.377 | -7.205  | 1.00 |
| 8.39      | 1 . . |     |                   |         |          |        |         |      |
| ATOM 4415 | CA    | CA  | . LEU LEU LEU B B | 144 144 | . 78.096 | 94.790 | -6.279  | 1.00 |
| 6.12      | 1 . . |     |                   |         |          |        |         |      |
| ATOM 4416 | CB    | CB  | . LEU LEU LEU B B | 144 144 | . 78.894 | 93.546 | -5.821  | 1.00 |
| 3.71      | 1 . . |     |                   |         |          |        |         |      |



|           |       |     |                   |         |          |         |         |      |
|-----------|-------|-----|-------------------|---------|----------|---------|---------|------|
| ATOM 4417 | CG    | CG  | . LEU LEU LEU B B | 144 144 | . 78.217 | 92.777  | -4.647  | 1.00 |
| 5.62      | 1 . . |     |                   |         |          |         |         |      |
| ATOM 4418 | CD1   | CD1 | . LEU LEU LEU B B | 144 144 | . 78.130 | 93.676  | -3.466  | 1.00 |
| 10.84     | 1 . . |     |                   |         |          |         |         |      |
| ATOM 4419 | CD2   | CD2 | . LEU LEU LEU B B | 144 144 | . 76.859 | 92.217  | -5.032  | 1.00 |
| 7.17      | 1 . . |     |                   |         |          |         |         |      |
| ATOM 4420 | C     | C   | . LEU LEU LEU B B | 144 144 | . 79.062 | 95.716  | -7.022  | 1.00 |
| 4.63      | 1 . . |     |                   |         |          |         |         |      |
| ATOM 4421 | O     | O   | . LEU LEU LEU B B | 144 144 | . 79.483 | 95.428  | -8.110  | 1.00 |
| 5.11      | 1 . . |     |                   |         |          |         |         |      |
| ATOM 4422 | N     | N   | . PRO PRO PRO B B | 145 145 | . 79.456 | 96.827  | -6.401  | 1.00 |
| 4.99      | 1 . . |     |                   |         |          |         |         |      |
| ATOM 4423 | CA    | CA  | . PRO PRO PRO B B | 145 145 | . 80.344 | 97.819  | -7.011  | 1.00 |
| 3.07      | 1 . . |     |                   |         |          |         |         |      |
| ATOM 4424 | CB    | CB  | . PRO PRO PRO B B | 145 145 | . 80.201 | 99.009  | -6.068  | 1.00 |
| 3.94      | 1 . . |     |                   |         |          |         |         |      |
| ATOM 4425 | CG    | CG  | . PRO PRO PRO B B | 145 145 | . 80.029 | 98.284  | -4.764  | 1.00 |
| 4.32      | 1 . . |     |                   |         |          |         |         |      |
| ATOM 4426 | CD    | CD  | . PRO PRO PRO B B | 145 145 | . 79.064 | 97.173  | -5.039  | 1.00 |
| 3.98      | 1 . . |     |                   |         |          |         |         |      |
| ATOM 4427 | C     | C   | . PRO PRO PRO B B | 145 145 | . 81.819 | 97.388  | -7.028  | 1.00 |
| 3.79      | 1 . . |     |                   |         |          |         |         |      |
| ATOM 4428 | O     | O   | . PRO PRO PRO B B | 145 145 | . 82.212 | 96.597  | -6.133  | 1.00 |
| 3.55      | 1 . . |     |                   |         |          |         |         |      |
| ATOM 4429 | N     | N   | . VAL VAL VAL B B | 146 146 | . 82.642 | 97.950  | -7.915  | 1.00 |
| 2.46      | 1 . . |     |                   |         |          |         |         |      |
| ATOM 4430 | CA    | CA  | . VAL VAL VAL B B | 146 146 | . 84.084 | 97.921  | -7.680  | 1.00 |
| 2.89      | 1 . . |     |                   |         |          |         |         |      |
| ATOM 4431 | CB    | CB  | . VAL VAL VAL B B | 146 146 | . 84.857 | 98.299  | -8.962  | 1.00 |
| 3.53      | 1 . . |     |                   |         |          |         |         |      |
| ATOM 4432 | CG1   | CG1 | . VAL VAL VAL B B | 146 146 | . 86.277 | 98.415  | -8.712  | 1.00 |
| 3.54      | 1 . . |     |                   |         |          |         |         |      |
| ATOM 4433 | CG2   | CG2 | . VAL VAL VAL B B | 146 146 | . 84.552 | 97.322  | -10.088 | 1.00 |
| 3.39      | 1 . . |     |                   |         |          |         |         |      |
| ATOM 4434 | C     | C   | . VAL VAL VAL B B | 146 146 | . 84.380 | 98.978  | -6.563  | 1.00 |
| 3.24      | 1 . . |     |                   |         |          |         |         |      |
| ATOM 4435 | O     | O   | . VAL VAL VAL B B | 146 146 | . 83.858 | 100.095 | -6.628  | 1.00 |
| 2.81      | 1 . . |     |                   |         |          |         |         |      |
| ATOM 4436 | N     | N   | . PRO PRO PRO B B | 147 147 | . 85.101 | 98.576  | -5.516  | 1.00 |
| 3.78      | 1 . . |     |                   |         |          |         |         |      |
| ATOM 4437 | CA    | CA  | . PRO PRO PRO B B | 147 147 | . 85.496 | 99.546  | -4.512  | 1.00 |
| 3.78      | 1 . . |     |                   |         |          |         |         |      |
| ATOM 4438 | CB    | CB  | . PRO PRO PRO B B | 147 147 | . 85.855 | 98.652  | -3.342  | 1.00 |
| 3.64      | 1 . . |     |                   |         |          |         |         |      |
| ATOM 4439 | CG    | CG  | . PRO PRO PRO B B | 147 147 | . 86.584 | 97.387  | -4.087  | 1.00 |
| 4.00      | 1 . . |     |                   |         |          |         |         |      |
| ATOM 4440 | CD    | CD  | . PRO PRO PRO B B | 147 147 | . 85.685 | 97.225  | -5.250  | 1.00 |
| 3.13      | 1 . . |     |                   |         |          |         |         |      |
| ATOM 4441 | C     | C   | . PRO PRO PRO B B | 147 147 | . 86.738 | 100.304 | -4.939  | 1.00 |
| 3.24      | 1 . . |     |                   |         |          |         |         |      |
| ATOM 4442 | O     | O   | . PRO PRO PRO B B | 147 147 | . 87.627 | 99.719  | -5.658  | 1.00 |
| 4.45      | 1 . . |     |                   |         |          |         |         |      |
| ATOM 4443 | N     | N   | . ALA ALA ALA B B | 148 148 | . 86.771 | 101.605 | -4.612  | 1.00 |
| 2.80      | 1 . . |     |                   |         |          |         |         |      |



|           |       |     |                   |         |           |         |        |      |
|-----------|-------|-----|-------------------|---------|-----------|---------|--------|------|
| ATOM 4471 | CG2   | CG2 | . VAL VAL VAL B B | 151 151 | . 96.652  | 103.512 | -2.486 | 1.00 |
| 7.95      | 1 . . |     |                   |         |           |         |        |      |
| ATOM 4472 | C     | C   | . VAL VAL VAL B B | 151 151 | . 96.744  | 105.463 | -0.155 | 1.00 |
| 8.98      | 1 . . |     |                   |         |           |         |        |      |
| ATOM 4473 | O     | O   | . VAL VAL VAL B B | 151 151 | . 97.643  | 105.267 | 0.674  | 1.00 |
| 10.92     | 1 . . |     |                   |         |           |         |        |      |
| ATOM 4474 | N     | N   | . ILE ILE ILE B B | 152 152 | . 96.780  | 106.514 | -0.933 | 1.00 |
| 11.74     | 1 . . |     |                   |         |           |         |        |      |
| ATOM 4475 | CA    | CA  | . ILE ILE ILE B B | 152 152 | . 97.733  | 107.576 | -0.680 | 1.00 |
| 11.51     | 1 . . |     |                   |         |           |         |        |      |
| ATOM 4476 | CB    | CB  | . ILE ILE ILE B B | 152 152 | . 98.793  | 107.725 | -1.769 | 1.00 |
| 11.77     | 1 . . |     |                   |         |           |         |        |      |
| ATOM 4477 | CG1   | CG1 | . ILE ILE ILE B B | 152 152 | . 99.639  | 106.436 | -1.786 | 1.00 |
| 8.62      | 1 . . |     |                   |         |           |         |        |      |
| ATOM 4478 | CD1   | CD1 | . ILE ILE ILE B B | 152 152 | . 101.012 | 106.602 | -2.345 | 1.00 |
| 7.60      | 1 . . |     |                   |         |           |         |        |      |
| ATOM 4479 | CG2   | CG2 | . ILE ILE ILE B B | 152 152 | . 99.657  | 108.988 | -1.538 | 1.00 |
| 12.62     | 1 . . |     |                   |         |           |         |        |      |
| ATOM 4480 | C     | C   | . ILE ILE ILE B B | 152 152 | . 96.895  | 108.792 | -0.477 | 1.00 |
| 12.90     | 1 . . |     |                   |         |           |         |        |      |
| ATOM 4481 | O     | O   | . ILE ILE ILE B B | 152 152 | . 96.307  | 109.275 | -1.454 | 1.00 |
| 11.14     | 1 . . |     |                   |         |           |         |        |      |
| ATOM 4482 | N     | N   | . ASN ASN ASN B B | 153 153 | . 96.824  | 109.209 | 0.806  | 1.00 |
| 13.79     | 1 . . |     |                   |         |           |         |        |      |
| ATOM 4483 | CA    | CA  | . ASN ASN ASN B B | 153 153 | . 95.951  | 110.310 | 1.287  | 1.00 |
| 15.46     | 1 . . |     |                   |         |           |         |        |      |
| ATOM 4484 | CB    | CB  | . ASN ASN ASN B B | 153 153 | . 95.567  | 110.078 | 2.753  | 1.00 |
| 16.64     | 1 . . |     |                   |         |           |         |        |      |
| ATOM 4485 | CG    | CG  | . ASN ASN ASN B B | 153 153 | . 94.394  | 109.096 | 2.944  | 1.00 |
| 14.22     | 1 . . |     |                   |         |           |         |        |      |
| ATOM 4486 | OD1   | OD1 | . ASN ASN ASN B B | 153 153 | . 93.818  | 108.577 | 1.992  | 1.00 |
| 16.62     | 1 . . |     |                   |         |           |         |        |      |
| ATOM 4487 | ND2   | ND2 | . ASN ASN ASN B B | 153 153 | . 94.055  | 108.832 | 4.215  | 1.00 |
| 8.58      | 1 . . |     |                   |         |           |         |        |      |
| ATOM 4488 | C     | C   | . ASN ASN ASN B B | 153 153 | . 96.675  | 111.646 | 1.233  | 1.00 |
| 15.42     | 1 . . |     |                   |         |           |         |        |      |
| ATOM 4489 | O     | O   | . ASN ASN ASN B B | 153 153 | . 97.849  | 111.789 | 1.636  | 1.00 |
| 16.30     | 1 . . |     |                   |         |           |         |        |      |
| ATOM 4490 | N     | N   | . GLY GLY GLY B B | 154 154 | . 95.958  | 112.665 | 0.823  | 1.00 |
| 13.93     | 1 . . |     |                   |         |           |         |        |      |
| ATOM 4491 | CA    | CA  | . GLY GLY GLY B B | 154 154 | . 96.635  | 113.889 | 0.477  | 1.00 |
| 11.90     | 1 . . |     |                   |         |           |         |        |      |
| ATOM 4492 | C     | C   | . GLY GLY GLY B B | 154 154 | . 95.678  | 115.001 | 0.824  | 1.00 |
| 11.58     | 1 . . |     |                   |         |           |         |        |      |
| ATOM 4493 | O     | O   | . GLY GLY GLY B B | 154 154 | . 94.622  | 114.781 | 1.411  | 1.00 |
| 12.21     | 1 . . |     |                   |         |           |         |        |      |
| ATOM 4494 | N     | N   | . GLY GLY GLY B B | 155 155 | . 96.001  | 116.173 | 0.356  | 0.50 |
| 9.27      | 1 . . |     |                   |         |           |         |        |      |
| ATOM 4495 | CA    | CA  | . GLY GLY GLY B B | 155 155 | . 95.052  | 117.290 | 0.458  | 0.50 |
| 8.04      | 1 . . |     |                   |         |           |         |        |      |
| ATOM 4496 | C     | C   | . GLY GLY GLY B B | 155 155 | . 94.705  | 117.566 | 1.905  | 0.50 |
| 6.12      | 1 . . |     |                   |         |           |         |        |      |
| ATOM 4497 | O     | O   | . GLY GLY GLY B B | 155 155 | . 95.555  | 117.578 | 2.768  | 0.50 |
| 5.89      | 1 . . |     |                   |         |           |         |        |      |

|           |       |     |                             |         |         |       |      |
|-----------|-------|-----|-----------------------------|---------|---------|-------|------|
| ATOM 4498 | N     | N   | . SER SER SER B B 156 156 . | 93.416  | 117.700 | 2.144 | 0.50 |
| 5.13      | 1 . . |     |                             |         |         |       |      |
| ATOM 4499 | CA    | CA  | . SER SER SER B B 156 156 . | 92.859  | 118.178 | 3.377 | 0.50 |
| 4.33      | 1 . . |     |                             |         |         |       |      |
| ATOM 4500 | CB    | CB  | . SER SER SER B B 156 156 . | 91.442  | 118.500 | 3.037 | 0.50 |
| 5.59      | 1 . . |     |                             |         |         |       |      |
| ATOM 4501 | OG    | OG  | . SER SER SER B B 156 156 . | 91.139  | 117.462 | 2.121 | 0.50 |
| 5.40      | 1 . . |     |                             |         |         |       |      |
| ATOM 4502 | C     | C   | . SER SER SER B B 156 156 . | 92.740  | 117.052 | 4.368 | 0.50 |
| 4.04      | 1 . . |     |                             |         |         |       |      |
| ATOM 4503 | O     | O   | . SER SER SER B B 156 156 . | 92.409  | 117.320 | 5.519 | 0.50 |
| 4.47      | 1 . . |     |                             |         |         |       |      |
| ATOM 4504 | N     | N   | . HIS HIS HIS B B 157 157 . | 92.969  | 115.825 | 3.903 | 0.50 |
| 4.20      | 1 . . |     |                             |         |         |       |      |
| ATOM 4505 | CA    | CA  | . HIS HIS HIS B B 157 157 . | 92.863  | 114.542 | 4.677 | 0.50 |
| 2.65      | 1 . . |     |                             |         |         |       |      |
| ATOM 4506 | CB    | CB  | . HIS HIS HIS B B 157 157 . | 92.268  | 113.421 | 3.798 | 0.50 |
| 3.39      | 1 . . |     |                             |         |         |       |      |
| ATOM 4507 | CG    | CG  | . HIS HIS HIS B B 157 157 . | 90.927  | 113.747 | 3.172 | 0.50 |
| 2.23      | 1 . . |     |                             |         |         |       |      |
| ATOM 4508 | ND1   | ND1 | . HIS HIS HIS B B 157 157 . | 90.341  | 112.904 | 2.243 | 0.50 |
| 2.59      | 1 . . |     |                             |         |         |       |      |
| ATOM 4509 | CE1   | CE1 | . HIS HIS HIS B B 157 157 . | 89.160  | 113.386 | 1.905 | 0.50 |
| 2.15      | 1 . . |     |                             |         |         |       |      |
| ATOM 4510 | NE2   | NE2 | . HIS HIS HIS B B 157 157 . | 89.017  | 114.575 | 2.476 | 0.50 |
| 3.08      | 1 . . |     |                             |         |         |       |      |
| ATOM 4511 | CD2   | CD2 | . HIS HIS HIS B B 157 157 . | 90.093  | 114.814 | 3.289 | 0.50 |
| 2.71      | 1 . . |     |                             |         |         |       |      |
| ATOM 4512 | C     | C   | . HIS HIS HIS B B 157 157 . | 94.140  | 114.036 | 5.362 | 0.50 |
| 3.43      | 1 . . |     |                             |         |         |       |      |
| ATOM 4513 | O     | O   | . HIS HIS HIS B B 157 157 . | 94.145  | 113.057 | 6.177 | 0.50 |
| 2.49      | 1 . . |     |                             |         |         |       |      |
| ATOM 4514 | N     | N   | . ALA ALA ALA B B 158 158 . | 95.234  | 114.745 | 5.141 | 0.50 |
| 3.14      | 1 . . |     |                             |         |         |       |      |
| ATOM 4515 | CA    | CA  | . ALA ALA ALA B B 158 158 . | 96.469  | 114.197 | 5.583 | 0.50 |
| 4.08      | 1 . . |     |                             |         |         |       |      |
| ATOM 4516 | CB    | CB  | . ALA ALA ALA B B 158 158 . | 97.015  | 113.208 | 4.503 | 0.50 |
| 3.69      | 1 . . |     |                             |         |         |       |      |
| ATOM 4517 | C     | C   | . ALA ALA ALA B B 158 158 . | 97.466  | 115.286 | 5.864 | 0.50 |
| 4.19      | 1 . . |     |                             |         |         |       |      |
| ATOM 4518 | O     | O   | . ALA ALA ALA B B 158 158 . | 97.381  | 116.386 | 5.317 | 0.50 |
| 4.68      | 1 . . |     |                             |         |         |       |      |
| ATOM 4519 | N     | N   | . GLY GLY GLY B B 159 159 . | 98.415  | 115.001 | 6.726 | 0.50 |
| 6.71      | 1 . . |     |                             |         |         |       |      |
| ATOM 4520 | CA    | CA  | . GLY GLY GLY B B 159 159 . | 99.462  | 115.990 | 6.932 | 0.50 |
| 9.88      | 1 . . |     |                             |         |         |       |      |
| ATOM 4521 | C     | C   | . GLY GLY GLY B B 159 159 . | 100.686 | 115.634 | 6.109 | 0.50 |
| 12.06     | 1 . . |     |                             |         |         |       |      |
| ATOM 4522 | O     | O   | . GLY GLY GLY B B 159 159 . | 101.406 | 114.723 | 6.476 | 0.50 |
| 10.57     | 1 . . |     |                             |         |         |       |      |
| ATOM 4523 | N     | N   | . ASN ASN ASN B B 160 160 . | 100.874 | 116.341 | 4.983 | 1.00 |
| 15.18     | 1 . . |     |                             |         |         |       |      |
| ATOM 4524 | CA    | CA  | . ASN ASN ASN B B 160 160 . | 102.034 | 116.262 | 4.072 | 1.00 |
| 16.90     | 1 . . |     |                             |         |         |       |      |

|           |       |     |                             |         |         |        |      |
|-----------|-------|-----|-----------------------------|---------|---------|--------|------|
| ATOM 4525 | CB    | CB  | . ASN ASN ASN B B 160 160 . | 102.124 | 114.864 | 3.417  | 1.00 |
| 17.88     | 1 . . |     |                             |         |         |        |      |
| ATOM 4526 | CG    | CG  | . ASN ASN ASN B B 160 160 . | 101.071 | 114.636 | 2.339  | 1.00 |
| 20.90     | 1 . . |     |                             |         |         |        |      |
| ATOM 4527 | OD1   | OD1 | . ASN ASN ASN B B 160 160 . | 99.881  | 114.966 | 2.523  | 1.00 |
| 20.65     | 1 . . |     |                             |         |         |        |      |
| ATOM 4528 | ND2   | ND2 | . ASN ASN ASN B B 160 160 . | 101.494 | 114.025 | 1.216  | 1.00 |
| 16.08     | 1 . . |     |                             |         |         |        |      |
| ATOM 4529 | C     | C   | . ASN ASN ASN B B 160 160 . | 101.837 | 117.327 | 3.019  | 1.00 |
| 17.57     | 1 . . |     |                             |         |         |        |      |
| ATOM 4530 | O     | O   | . ASN ASN ASN B B 160 160 . | 100.754 | 117.911 | 2.978  | 1.00 |
| 18.43     | 1 . . |     |                             |         |         |        |      |
| ATOM 4531 | N     | N   | . LYS LYS LYS B B 161 161 . | 102.845 | 117.590 | 2.169  | 1.00 |
| 18.13     | 1 . . |     |                             |         |         |        |      |
| ATOM 4532 | CA    | CA  | . LYS LYS LYS B B 161 161 . | 102.774 | 118.627 | 1.114  | 1.00 |
| 19.69     | 1 . . |     |                             |         |         |        |      |
| ATOM 4533 | CB    | CB  | . LYS LYS LYS B B 161 161 . | 104.155 | 118.961 | 0.616  | 1.00 |
| 20.23     | 1 . . |     |                             |         |         |        |      |
| ATOM 4534 | CG    | CG  | . LYS LYS LYS B B 161 161 . | 105.005 | 119.864 | 1.482  | 1.00 |
| 20.04     | 1 . . |     |                             |         |         |        |      |
| ATOM 4535 | CD    | CD  | . LYS LYS LYS B B 161 161 . | 104.889 | 121.369 | 1.184  | 1.00 |
| 18.65     | 1 . . |     |                             |         |         |        |      |
| ATOM 4536 | CE    | CE  | . LYS LYS LYS B B 161 161 . | 105.894 | 122.129 | 2.080  | 1.00 |
| 19.41     | 1 . . |     |                             |         |         |        |      |
| ATOM 4537 | NZ    | NZ  | . LYS LYS LYS B B 161 161 . | 105.318 | 122.478 | 3.427  | 1.00 |
| 19.13     | 1 . . |     |                             |         |         |        |      |
| ATOM 4538 | C     | C   | . LYS LYS LYS B B 161 161 . | 102.035 | 118.282 | -0.198 | 1.00 |
| 20.39     | 1 . . |     |                             |         |         |        |      |
| ATOM 4539 | O     | O   | . LYS LYS LYS B B 161 161 . | 101.879 | 119.142 | -1.079 | 1.00 |
| 21.67     | 1 . . |     |                             |         |         |        |      |
| ATOM 4540 | N     | N   | . LEU LEU LEU B B 162 162 . | 101.673 | 117.027 | -0.367 | 1.00 |
| 19.67     | 1 . . |     |                             |         |         |        |      |
| ATOM 4541 | CA    | CA  | . LEU LEU LEU B B 162 162 . | 101.065 | 116.571 | -1.615 | 1.00 |
| 18.63     | 1 . . |     |                             |         |         |        |      |
| ATOM 4542 | CB    | CB  | . LEU LEU LEU B B 162 162 . | 100.800 | 115.101 | -1.501 | 1.00 |
| 18.20     | 1 . . |     |                             |         |         |        |      |
| ATOM 4543 | CG    | CG  | . LEU LEU LEU B B 162 162 . | 100.406 | 114.334 | -2.772 | 1.00 |
| 18.88     | 1 . . |     |                             |         |         |        |      |
| ATOM 4544 | CD1   | CD1 | . LEU LEU LEU B B 162 162 . | 101.580 | 114.170 | -3.667 | 1.00 |
| 20.73     | 1 . . |     |                             |         |         |        |      |
| ATOM 4545 | CD2   | CD2 | . LEU LEU LEU B B 162 162 . | 99.975  | 113.038 | -2.296 | 1.00 |
| 20.00     | 1 . . |     |                             |         |         |        |      |
| ATOM 4546 | C     | C   | . LEU LEU LEU B B 162 162 . | 99.751  | 117.365 | -1.829 | 1.00 |
| 16.86     | 1 . . |     |                             |         |         |        |      |
| ATOM 4547 | O     | O   | . LEU LEU LEU B B 162 162 . | 98.934  | 117.418 | -0.931 | 1.00 |
| 17.68     | 1 . . |     |                             |         |         |        |      |
| ATOM 4548 | N     | N   | . ALA ALA ALA B B 163 163 . | 99.590  | 117.997 | -2.989 | 1.00 |
| 15.74     | 1 . . |     |                             |         |         |        |      |
| ATOM 4549 | CA    | CA  | . ALA ALA ALA B B 163 163 . | 98.414  | 118.887 | -3.250 | 1.00 |
| 13.99     | 1 . . |     |                             |         |         |        |      |
| ATOM 4550 | CB    | CB  | . ALA ALA ALA B B 163 163 . | 98.726  | 119.947 | -4.316 | 1.00 |
| 15.09     | 1 . . |     |                             |         |         |        |      |
| ATOM 4551 | C     | C   | . ALA ALA ALA B B 163 163 . | 97.112  | 118.122 | -3.593 | 1.00 |
| 12.22     | 1 . . |     |                             |         |         |        |      |

|           |       |     |                   |         |          |         |        |      |
|-----------|-------|-----|-------------------|---------|----------|---------|--------|------|
| ATOM 4552 | O     | O   | . ALA ALA ALA B B | 163 163 | . 96.021 | 118.441 | -3.124 | 1.00 |
| 11.59     | 1 . . |     |                   |         |          |         |        |      |
| ATOM 4553 | N     | N   | . MET MET MET B B | 164 164 | . 97.222 | 117.100 | -4.408 | 1.00 |
| 8.38      | 1 . . |     |                   |         |          |         |        |      |
| ATOM 4554 | CA    | CA  | . MET MET MET B B | 164 164 | . 96.017 | 116.396 | -4.804 | 1.00 |
| 7.26      | 1 . . |     |                   |         |          |         |        |      |
| ATOM 4555 | CB    | CB  | . MET MET MET B B | 164 164 | . 96.208 | 115.684 | -6.150 | 1.00 |
| 7.60      | 1 . . |     |                   |         |          |         |        |      |
| ATOM 4556 | CG    | CG  | . MET MET MET B B | 164 164 | . 96.670 | 116.670 | -7.185 | 1.00 |
| 7.47      | 1 . . |     |                   |         |          |         |        |      |
| ATOM 4557 | SD    | SD  | . MET MET MET B B | 164 164 | . 96.900 | 115.870 | -8.787 | 1.00 |
| 7.21      | 1 . . |     |                   |         |          |         |        |      |
| ATOM 4558 | CE    | CE  | . MET MET MET B B | 164 164 | . 97.554 | 117.263 | -9.727 | 1.00 |
| 7.39      | 1 . . |     |                   |         |          |         |        |      |
| ATOM 4559 | C     | C   | . MET MET MET B B | 164 164 | . 95.583 | 115.515 | -3.664 | 1.00 |
| 5.81      | 1 . . |     |                   |         |          |         |        |      |
| ATOM 4560 | O     | O   | . MET MET MET B B | 164 164 | . 96.405 | 114.984 | -2.924 | 1.00 |
| 7.35      | 1 . . |     |                   |         |          |         |        |      |
| ATOM 4561 | N     | N   | . GLN GLN GLN B B | 165 165 | . 94.295 | 115.364 | -3.483 | 1.00 |
| 6.14      | 1 . . |     |                   |         |          |         |        |      |
| ATOM 4562 | CA    | CA  | . GLN GLN GLN B B | 165 165 | . 93.737 | 114.800 | -2.271 | 1.00 |
| 7.91      | 1 . . |     |                   |         |          |         |        |      |
| ATOM 4563 | CB    | CB  | . GLN GLN GLN B B | 165 165 | . 92.271 | 115.234 | -2.167 | 1.00 |
| 8.58      | 1 . . |     |                   |         |          |         |        |      |
| ATOM 4564 | CG    | CG  | . GLN GLN GLN B B | 165 165 | . 91.554 | 114.829 | -0.877 | 1.00 |
| 7.53      | 1 . . |     |                   |         |          |         |        |      |
| ATOM 4565 | CD    | CD  | . GLN GLN GLN B B | 165 165 | . 90.135 | 115.448 | -0.799 | 1.00 |
| 7.22      | 1 . . |     |                   |         |          |         |        |      |
| ATOM 4566 | OE1   | OE1 | . GLN GLN GLN B B | 165 165 | . 89.958 | 116.574 | -0.351 | 1.00 |
| 6.75      | 1 . . |     |                   |         |          |         |        |      |
| ATOM 4567 | NE2   | NE2 | . GLN GLN GLN B B | 165 165 | . 89.152 | 114.708 | -1.274 | 1.00 |
| 7.26      | 1 . . |     |                   |         |          |         |        |      |
| ATOM 4568 | C     | C   | . GLN GLN GLN B B | 165 165 | . 93.816 | 113.266 | -2.179 | 1.00 |
| 7.26      | 1 . . |     |                   |         |          |         |        |      |
| ATOM 4569 | O     | O   | . GLN GLN GLN B B | 165 165 | . 94.151 | 112.728 | -1.124 | 1.00 |
| 9.73      | 1 . . |     |                   |         |          |         |        |      |
| ATOM 4570 | N     | N   | . GLU GLU GLU B B | 166 166 | . 93.411 | 112.533 | -3.232 | 1.00 |
| 7.58      | 1 . . |     |                   |         |          |         |        |      |
| ATOM 4571 | CA    | CA  | . GLU GLU GLU B B | 166 166 | . 93.276 | 111.066 | -3.137 | 1.00 |
| 6.31      | 1 . . |     |                   |         |          |         |        |      |
| ATOM 4572 | CB    | CB  | . GLU GLU GLU B B | 166 166 | . 91.844 | 110.628 | -3.005 | 1.00 |
| 5.86      | 1 . . |     |                   |         |          |         |        |      |
| ATOM 4573 | CG    | CG  | . GLU GLU GLU B B | 166 166 | . 91.034 | 111.496 | -1.985 | 1.00 |
| 5.70      | 1 . . |     |                   |         |          |         |        |      |
| ATOM 4574 | CD    | CD  | . GLU GLU GLU B B | 166 166 | . 89.557 | 111.180 | -1.981 | 1.00 |
| 7.24      | 1 . . |     |                   |         |          |         |        |      |
| ATOM 4575 | OE1   | OE1 | . GLU GLU GLU B B | 166 166 | . 89.125 | 110.211 | -2.682 | 1.00 |
| 7.58      | 1 . . |     |                   |         |          |         |        |      |
| ATOM 4576 | OE2   | OE2 | . GLU GLU GLU B B | 166 166 | . 88.752 | 111.919 | -1.318 | 1.00 |
| 8.33      | 1 . . |     |                   |         |          |         |        |      |
| ATOM 4577 | C     | C   | . GLU GLU GLU B B | 166 166 | . 93.875 | 110.344 | -4.342 | 1.00 |
| 6.36      | 1 . . |     |                   |         |          |         |        |      |
| ATOM 4578 | O     | O   | . GLU GLU GLU B B | 166 166 | . 93.662 | 110.756 | -5.497 | 1.00 |
| 8.26      | 1 . . |     |                   |         |          |         |        |      |

|           |     |       |                   |         |          |         |        |      |
|-----------|-----|-------|-------------------|---------|----------|---------|--------|------|
| ATOM 4579 | N   | N     | . PHE PHE PHE B B | 167 167 | . 94.543 | 109.244 | -4.049 | 1.00 |
| 7.17      | 1   | . . . |                   |         |          |         |        |      |
| ATOM 4580 | CA  | CA    | . PHE PHE PHE B B | 167 167 | . 95.101 | 108.303 | -5.044 | 1.00 |
| 5.15      | 1   | . . . |                   |         |          |         |        |      |
| ATOM 4581 | CB  | CB    | . PHE PHE PHE B B | 167 167 | . 96.674 | 108.339 | -5.068 | 1.00 |
| 4.70      | 1   | . . . |                   |         |          |         |        |      |
| ATOM 4582 | CG  | CG    | . PHE PHE PHE B B | 167 167 | . 97.238 | 109.674 | -5.456 | 1.00 |
| 7.11      | 1   | . . . |                   |         |          |         |        |      |
| ATOM 4583 | CD1 | CD1   | . PHE PHE PHE B B | 167 167 | . 97.288 | 110.694 | -4.535 | 1.00 |
| 10.35     | 1   | . . . |                   |         |          |         |        |      |
| ATOM 4584 | CE1 | CE1   | . PHE PHE PHE B B | 167 167 | . 97.769 | 111.942 | -4.933 | 1.00 |
| 10.16     | 1   | . . . |                   |         |          |         |        |      |
| ATOM 4585 | CZ  | CZ    | . PHE PHE PHE B B | 167 167 | . 98.228 | 112.139 | -6.224 | 1.00 |
| 11.84     | 1   | . . . |                   |         |          |         |        |      |
| ATOM 4586 | CE2 | CE2   | . PHE PHE PHE B B | 167 167 | . 98.186 | 111.120 | -7.125 | 1.00 |
| 9.99      | 1   | . . . |                   |         |          |         |        |      |
| ATOM 4587 | CD2 | CD2   | . PHE PHE PHE B B | 167 167 | . 97.677 | 109.912 | -6.748 | 1.00 |
| 8.85      | 1   | . . . |                   |         |          |         |        |      |
| ATOM 4588 | C   | C     | . PHE PHE PHE B B | 167 167 | . 94.505 | 106.962 | -4.673 | 1.00 |
| 5.00      | 1   | . . . |                   |         |          |         |        |      |
| ATOM 4589 | O   | O     | . PHE PHE PHE B B | 167 167 | . 94.948 | 106.373 | -3.646 | 1.00 |
| 5.85      | 1   | . . . |                   |         |          |         |        |      |
| ATOM 4590 | N   | N     | . MET MET MET B B | 168 168 | . 93.562 | 106.466 | -5.484 | 1.00 |
| 4.06      | 1   | . . . |                   |         |          |         |        |      |
| ATOM 4591 | CA  | CA    | . MET MET MET B B | 168 168 | . 92.766 | 105.289 | -5.195 | 1.00 |
| 3.55      | 1   | . . . |                   |         |          |         |        |      |
| ATOM 4592 | CB  | CB    | . MET MET MET B B | 168 168 | . 91.286 | 105.535 | -5.427 | 1.00 |
| 2.91      | 1   | . . . |                   |         |          |         |        |      |
| ATOM 4593 | CG  | CG    | . MET MET MET B B | 168 168 | . 90.695 | 106.584 | -4.444 | 1.00 |
| 3.57      | 1   | . . . |                   |         |          |         |        |      |
| ATOM 4594 | SD  | SD    | . MET MET MET B B | 168 168 | . 89.050 | 107.063 | -4.911 | 1.00 |
| 5.46      | 1   | . . . |                   |         |          |         |        |      |
| ATOM 4595 | CE  | CE    | . MET MET MET B B | 168 168 | . 89.329 | 108.661 | -5.685 | 1.00 |
| 6.59      | 1   | . . . |                   |         |          |         |        |      |
| ATOM 4596 | C   | C     | . MET MET MET B B | 168 168 | . 93.157 | 104.118 | -6.115 | 1.00 |
| 3.79      | 1   | . . . |                   |         |          |         |        |      |
| ATOM 4597 | O   | O     | . MET MET MET B B | 168 168 | . 93.622 | 104.300 | -7.297 | 1.00 |
| 2.79      | 1   | . . . |                   |         |          |         |        |      |
| ATOM 4598 | N   | N     | . ILE ILE ILE B B | 169 169 | . 93.048 | 102.914 | -5.553 | 1.00 |
| 3.11      | 1   | . . . |                   |         |          |         |        |      |
| ATOM 4599 | CA  | CA    | . ILE ILE ILE B B | 169 169 | . 93.193 | 101.717 | -6.381 | 1.00 |
| 2.09      | 1   | . . . |                   |         |          |         |        |      |
| ATOM 4600 | CB  | CB    | . ILE ILE ILE B B | 169 169 | . 94.257 | 100.714 | -5.785 | 1.00 |
| 2.23      | 1   | . . . |                   |         |          |         |        |      |
| ATOM 4601 | CG1 | CG1   | . ILE ILE ILE B B | 169 169 | . 93.840 | 100.233 | -4.374 | 1.00 |
| 3.47      | 1   | . . . |                   |         |          |         |        |      |
| ATOM 4602 | CD1 | CD1   | . ILE ILE ILE B B | 169 169 | . 94.746 | 99.070  | -3.890 | 1.00 |
| 4.95      | 1   | . . . |                   |         |          |         |        |      |
| ATOM 4603 | CG2 | CG2   | . ILE ILE ILE B B | 169 169 | . 95.639 | 101.283 | -5.925 | 1.00 |
| 3.59      | 1   | . . . |                   |         |          |         |        |      |
| ATOM 4604 | C   | C     | . ILE ILE ILE B B | 169 169 | . 91.772 | 101.075 | -6.552 | 1.00 |
| 3.11      | 1   | . . . |                   |         |          |         |        |      |
| ATOM 4605 | O   | O     | . ILE ILE ILE B B | 169 169 | . 90.979 | 100.953 | -5.571 | 1.00 |
| 3.74      | 1   | . . . |                   |         |          |         |        |      |

|           |       |     |                   |         |          |         |         |      |
|-----------|-------|-----|-------------------|---------|----------|---------|---------|------|
| ATOM 4606 | N     | N   | . LEU LEU LEU B B | 170 170 | . 91.483 | 100.545 | -7.753  | 1.00 |
| 3.38      | 1 . . |     |                   |         |          |         |         |      |
| ATOM 4607 | CA    | CA  | . LEU LEU LEU B B | 170 170 | . 90.206 | 99.918  | -8.110  | 1.00 |
| 3.22      | 1 . . |     |                   |         |          |         |         |      |
| ATOM 4608 | CB    | CB  | . LEU LEU LEU B B | 170 170 | . 89.499 | 100.758 | -9.190  | 1.00 |
| 3.96      | 1 . . |     |                   |         |          |         |         |      |
| ATOM 4609 | CG    | CG  | . LEU LEU LEU B B | 170 170 | . 88.716 | 102.067 | -8.867  | 1.00 |
| 2.69      | 1 . . |     |                   |         |          |         |         |      |
| ATOM 4610 | CD1   | CD1 | . LEU LEU LEU B B | 170 170 | . 89.649 | 103.235 | -8.579  | 1.00 |
| 4.94      | 1 . . |     |                   |         |          |         |         |      |
| ATOM 4611 | CD2   | CD2 | . LEU LEU LEU B B | 170 170 | . 87.701 | 102.370 | -10.039 | 1.00 |
| 6.77      | 1 . . |     |                   |         |          |         |         |      |
| ATOM 4612 | C     | C   | . LEU LEU LEU B B | 170 170 | . 90.407 | 98.505  | -8.702  | 1.00 |
| 4.30      | 1 . . |     |                   |         |          |         |         |      |
| ATOM 4613 | O     | O   | . LEU LEU LEU B B | 170 170 | . 90.852 | 98.390  | -9.869  | 1.00 |
| 5.53      | 1 . . |     |                   |         |          |         |         |      |
| ATOM 4614 | N     | N   | . PRO PRO PRO B B | 171 171 | . 90.033 | 97.424  | -7.966  | 1.00 |
| 3.53      | 1 . . |     |                   |         |          |         |         |      |
| ATOM 4615 | CA    | CA  | . PRO PRO PRO B B | 171 171 | . 90.273 | 96.084  | -8.452  | 1.00 |
| 3.42      | 1 . . |     |                   |         |          |         |         |      |
| ATOM 4616 | CB    | CB  | . PRO PRO PRO B B | 171 171 | . 90.133 | 95.240  | -7.172  | 1.00 |
| 3.69      | 1 . . |     |                   |         |          |         |         |      |
| ATOM 4617 | CG    | CG  | . PRO PRO PRO B B | 171 171 | . 90.401 | 96.272  | -6.001  | 1.00 |
| 4.22      | 1 . . |     |                   |         |          |         |         |      |
| ATOM 4618 | CD    | CD  | . PRO PRO PRO B B | 171 171 | . 89.628 | 97.424  | -6.535  | 1.00 |
| 2.64      | 1 . . |     |                   |         |          |         |         |      |
| ATOM 4619 | C     | C   | . PRO PRO PRO B B | 171 171 | . 89.239 | 95.649  | -9.465  | 1.00 |
| 4.20      | 1 . . |     |                   |         |          |         |         |      |
| ATOM 4620 | O     | O   | . PRO PRO PRO B B | 171 171 | . 88.370 | 94.843  | -9.211  | 1.00 |
| 4.51      | 1 . . |     |                   |         |          |         |         |      |
| ATOM 4621 | N     | N   | . VAL VAL VAL B B | 172 172 | . 89.285 | 96.294  | -10.614 | 1.00 |
| 3.44      | 1 . . |     |                   |         |          |         |         |      |
| ATOM 4622 | CA    | CA  | . VAL VAL VAL B B | 172 172 | . 88.334 | 96.052  | -11.686 | 1.00 |
| 5.43      | 1 . . |     |                   |         |          |         |         |      |
| ATOM 4623 | CB    | CB  | . VAL VAL VAL B B | 172 172 | . 88.517 | 97.064  | -12.884 | 1.00 |
| 5.45      | 1 . . |     |                   |         |          |         |         |      |
| ATOM 4624 | CG1   | CG1 | . VAL VAL VAL B B | 172 172 | . 88.198 | 98.512  | -12.472 | 1.00 |
| 6.50      | 1 . . |     |                   |         |          |         |         |      |
| ATOM 4625 | CG2   | CG2 | . VAL VAL VAL B B | 172 172 | . 89.975 | 96.995  | -13.425 | 1.00 |
| 6.12      | 1 . . |     |                   |         |          |         |         |      |
| ATOM 4626 | C     | C   | . VAL VAL VAL B B | 172 172 | . 88.405 | 94.595  | -12.164 | 1.00 |
| 6.05      | 1 . . |     |                   |         |          |         |         |      |
| ATOM 4627 | O     | O   | . VAL VAL VAL B B | 172 172 | . 87.426 | 94.073  | -12.611 | 1.00 |
| 7.04      | 1 . . |     |                   |         |          |         |         |      |
| ATOM 4628 | N     | N   | . GLY GLY GLY B B | 173 173 | . 89.585 | 94.022  | -12.110 | 1.00 |
| 6.85      | 1 . . |     |                   |         |          |         |         |      |
| ATOM 4629 | CA    | CA  | . GLY GLY GLY B B | 173 173 | . 89.825 | 92.631  | -12.537 | 1.00 |
| 5.98      | 1 . . |     |                   |         |          |         |         |      |
| ATOM 4630 | C     | C   | . GLY GLY GLY B B | 173 173 | . 89.517 | 91.543  | -11.538 | 1.00 |
| 6.62      | 1 . . |     |                   |         |          |         |         |      |
| ATOM 4631 | O     | O   | . GLY GLY GLY B B | 173 173 | . 89.810 | 90.376  | -11.796 | 1.00 |
| 10.51     | 1 . . |     |                   |         |          |         |         |      |
| ATOM 4632 | N     | N   | . ALA ALA ALA B B | 174 174 | . 88.920 | 91.872  | -10.412 | 1.00 |
| 6.28      | 1 . . |     |                   |         |          |         |         |      |



|           |       |     |                   |         |          |        |         |      |
|-----------|-------|-----|-------------------|---------|----------|--------|---------|------|
| ATOM 4633 | CA    | CA  | . ALA ALA ALA B B | 174 174 | . 88.733 | 90.896 | -9.353  | 1.00 |
| 4.60      | 1 . . |     |                   |         |          |        |         |      |
| ATOM 4634 | CB    | CB  | . ALA ALA ALA B B | 174 174 | . 88.486 | 91.618 | -8.040  | 1.00 |
| 4.69      | 1 . . |     |                   |         |          |        |         |      |
| ATOM 4635 | C     | C   | . ALA ALA ALA B B | 174 174 | . 87.578 | 89.999 | -9.709  | 1.00 |
| 5.91      | 1 . . |     |                   |         |          |        |         |      |
| ATOM 4636 | O     | O   | . ALA ALA ALA B B | 174 174 | . 86.733 | 90.339 | -10.537 | 1.00 |
| 6.35      | 1 . . |     |                   |         |          |        |         |      |
| ATOM 4637 | N     | N   | . GLU GLU GLU B B | 175 175 | . 87.518 | 88.816 | -9.099  | 1.00 |
| 6.15      | 1 . . |     |                   |         |          |        |         |      |
| ATOM 4638 | CA    | CA  | . GLU GLU GLU B B | 175 175 | . 86.441 | 87.855 | -9.376  | 1.00 |
| 8.70      | 1 . . |     |                   |         |          |        |         |      |
| ATOM 4639 | CB    | CB  | . GLU GLU GLU B B | 175 175 | . 86.917 | 86.472 | -9.008  | 1.00 |
| 10.15     | 1 . . |     |                   |         |          |        |         |      |
| ATOM 4640 | CG    | CG  | . GLU GLU GLU B B | 175 175 | . 88.288 | 86.086 | -9.620  | 1.00 |
| 17.99     | 1 . . |     |                   |         |          |        |         |      |
| ATOM 4641 | CD    | CD  | . GLU GLU GLU B B | 175 175 | . 88.798 | 84.789 | -9.054  | 1.00 |
| 26.01     | 1 . . |     |                   |         |          |        |         |      |
| ATOM 4642 | OE1   | OE1 | . GLU GLU GLU B B | 175 175 | . 87.951 | 83.896 | -8.843  | 1.00 |
| 30.15     | 1 . . |     |                   |         |          |        |         |      |
| ATOM 4643 | OE2   | OE2 | . GLU GLU GLU B B | 175 175 | . 90.036 | 84.655 | -8.821  | 1.00 |
| 30.21     | 1 . . |     |                   |         |          |        |         |      |
| ATOM 4644 | C     | C   | . GLU GLU GLU B B | 175 175 | . 85.062 | 88.092 | -8.755  | 1.00 |
| 8.00      | 1 . . |     |                   |         |          |        |         |      |
| ATOM 4645 | O     | O   | . GLU GLU GLU B B | 175 175 | . 84.066 | 87.533 | -9.239  | 1.00 |
| 9.01      | 1 . . |     |                   |         |          |        |         |      |
| ATOM 4646 | N     | N   | . SER SER SER B B | 176 176 | . 85.006 | 88.933 | -7.700  | 1.00 |
| 5.71      | 1 . . |     |                   |         |          |        |         |      |
| ATOM 4647 | CA    | CA  | . SER SER SER B B | 176 176 | . 83.787 | 89.144 | -6.953  | 1.00 |
| 4.34      | 1 . . |     |                   |         |          |        |         |      |
| ATOM 4648 | CB    | CB  | . SER SER SER B B | 176 176 | . 83.498 | 87.908 | -6.058  | 1.00 |
| 4.99      | 1 . . |     |                   |         |          |        |         |      |
| ATOM 4649 | OG    | OG  | . SER SER SER B B | 176 176 | . 84.567 | 87.697 | -5.153  | 1.00 |
| 5.58      | 1 . . |     |                   |         |          |        |         |      |
| ATOM 4650 | C     | C   | . SER SER SER B B | 176 176 | . 84.114 | 90.296 | -6.015  | 1.00 |
| 3.46      | 1 . . |     |                   |         |          |        |         |      |
| ATOM 4651 | O     | O   | . SER SER SER B B | 176 176 | . 85.254 | 90.709 | -5.939  | 1.00 |
| 2.73      | 1 . . |     |                   |         |          |        |         |      |
| ATOM 4652 | N     | N   | . PHE PHE PHE B B | 177 177 | . 83.132 | 90.740 | -5.270  | 1.00 |
| 4.58      | 1 . . |     |                   |         |          |        |         |      |
| ATOM 4653 | CA    | CA  | . PHE PHE PHE B B | 177 177 | . 83.412 | 91.811 | -4.321  | 1.00 |
| 3.21      | 1 . . |     |                   |         |          |        |         |      |
| ATOM 4654 | CB    | CB  | . PHE PHE PHE B B | 177 177 | . 82.146 | 92.367 | -3.650  | 1.00 |
| 3.95      | 1 . . |     |                   |         |          |        |         |      |
| ATOM 4655 | CG    | CG  | . PHE PHE PHE B B | 177 177 | . 82.463 | 93.632 | -2.885  | 1.00 |
| 4.12      | 1 . . |     |                   |         |          |        |         |      |
| ATOM 4656 | CD1   | CD1 | . PHE PHE PHE B B | 177 177 | . 82.496 | 94.835 | -3.548  | 1.00 |
| 4.47      | 1 . . |     |                   |         |          |        |         |      |
| ATOM 4657 | CE1   | CE1 | . PHE PHE PHE B B | 177 177 | . 82.873 | 95.979 | -2.893  | 1.00 |
| 4.47      | 1 . . |     |                   |         |          |        |         |      |
| ATOM 4658 | CZ    | CZ  | . PHE PHE PHE B B | 177 177 | . 83.197 | 95.948 | -1.565  | 1.00 |
| 4.94      | 1 . . |     |                   |         |          |        |         |      |
| ATOM 4659 | CE2   | CE2 | . PHE PHE PHE B B | 177 177 | . 83.179 | 94.762 | -0.832  | 1.00 |
| 4.04      | 1 . . |     |                   |         |          |        |         |      |

|           |       |     |                   |         |          |        |        |      |
|-----------|-------|-----|-------------------|---------|----------|--------|--------|------|
| ATOM 4660 | CD2   | CD2 | . PHE PHE PHE B B | 177 177 | . 82.805 | 93.583 | -1.484 | 1.00 |
| 2.53      | 1 . . |     |                   |         |          |        |        |      |
| ATOM 4661 | C     | C   | . PHE PHE PHE B B | 177 177 | . 84.375 | 91.337 | -3.221 | 1.00 |
| 3.59      | 1 . . |     |                   |         |          |        |        |      |
| ATOM 4662 | O     | O   | . PHE PHE PHE B B | 177 177 | . 85.311 | 92.063 | -2.825 | 1.00 |
| 3.68      | 1 . . |     |                   |         |          |        |        |      |
| ATOM 4663 | N     | N   | . ARG ARG ARG B B | 178 178 | . 84.099 | 90.121 | -2.682 | 1.00 |
| 4.17      | 1 . . |     |                   |         |          |        |        |      |
| ATOM 4664 | CA    | CA  | . ARG ARG ARG B B | 178 178 | . 84.985 | 89.639 | -1.642 | 1.00 |
| 5.08      | 1 . . |     |                   |         |          |        |        |      |
| ATOM 4665 | CB    | CB  | . ARG ARG ARG B B | 178 178 | . 84.423 | 88.345 | -1.005 | 1.00 |
| 5.50      | 1 . . |     |                   |         |          |        |        |      |
| ATOM 4666 | CG    | CG  | . ARG ARG ARG B B | 178 178 | . 83.344 | 88.639 | 0.041  | 1.00 |
| 12.90     | 1 . . |     |                   |         |          |        |        |      |
| ATOM 4667 | CD    | CD  | . ARG ARG ARG B B | 178 178 | . 82.358 | 87.454 | 0.289  | 1.00 |
| 21.77     | 1 . . |     |                   |         |          |        |        |      |
| ATOM 4668 | NE    | NE  | . ARG ARG ARG B B | 178 178 | . 82.119 | 86.728 | -0.956 | 1.00 |
| 26.16     | 1 . . |     |                   |         |          |        |        |      |
| ATOM 4669 | CZ    | CZ  | . ARG ARG ARG B B | 178 178 | . 81.150 | 85.841 | -1.193 | 1.00 |
| 26.93     | 1 . . |     |                   |         |          |        |        |      |
| ATOM 4670 | NH1   | NH1 | . ARG ARG ARG B B | 178 178 | . 80.256 | 85.553 | -0.273 | 1.00 |
| 25.85     | 1 . . |     |                   |         |          |        |        |      |
| ATOM 4671 | NH2   | NH2 | . ARG ARG ARG B B | 178 178 | . 81.066 | 85.271 | -2.391 | 1.00 |
| 28.92     | 1 . . |     |                   |         |          |        |        |      |
| ATOM 4672 | C     | C   | . ARG ARG ARG B B | 178 178 | . 86.449 | 89.504 | -2.169 | 1.00 |
| 3.54      | 1 . . |     |                   |         |          |        |        |      |
| ATOM 4673 | O     | O   | . ARG ARG ARG B B | 178 178 | . 87.430 | 89.763 | -1.433 | 1.00 |
| 4.02      | 1 . . |     |                   |         |          |        |        |      |
| ATOM 4674 | N     | N   | . ASP ASP ASP B B | 179 179 | . 86.610 | 89.053 | -3.438 | 1.00 |
| 4.13      | 1 . . |     |                   |         |          |        |        |      |
| ATOM 4675 | CA    | CA  | . ASP ASP ASP B B | 179 179 | . 87.963 | 89.006 | -4.041 | 1.00 |
| 4.49      | 1 . . |     |                   |         |          |        |        |      |
| ATOM 4676 | CB    | CB  | . ASP ASP ASP B B | 179 179 | . 87.877 | 88.293 | -5.397 | 1.00 |
| 5.93      | 1 . . |     |                   |         |          |        |        |      |
| ATOM 4677 | CG    | CG  | . ASP ASP ASP B B | 179 179 | . 89.235 | 87.930 | -5.940 | 1.00 |
| 6.38      | 1 . . |     |                   |         |          |        |        |      |
| ATOM 4678 | OD1   | OD1 | . ASP ASP ASP B B | 179 179 | . 89.573 | 88.338 | -7.098 | 1.00 |
| 10.40     | 1 . . |     |                   |         |          |        |        |      |
| ATOM 4679 | OD2   | OD2 | . ASP ASP ASP B B | 179 179 | . 90.030 | 87.345 | -5.158 | 1.00 |
| 6.91      | 1 . . |     |                   |         |          |        |        |      |
| ATOM 4680 | C     | C   | . ASP ASP ASP B B | 179 179 | . 88.638 | 90.407 | -4.228 | 1.00 |
| 2.63      | 1 . . |     |                   |         |          |        |        |      |
| ATOM 4681 | O     | O   | . ASP ASP ASP B B | 179 179 | . 89.823 | 90.588 | -4.014 | 1.00 |
| 2.57      | 1 . . |     |                   |         |          |        |        |      |
| ATOM 4682 | N     | N   | . ALA ALA ALA B B | 180 180 | . 87.818 | 91.404 | -4.547 | 1.00 |
| 2.67      | 1 . . |     |                   |         |          |        |        |      |
| ATOM 4683 | CA    | CA  | . ALA ALA ALA B B | 180 180 | . 88.303 | 92.775 | -4.694 | 1.00 |
| 2.58      | 1 . . |     |                   |         |          |        |        |      |
| ATOM 4684 | CB    | CB  | . ALA ALA ALA B B | 180 180 | . 87.189 | 93.661 | -5.263 | 1.00 |
| 4.25      | 1 . . |     |                   |         |          |        |        |      |
| ATOM 4685 | C     | C   | . ALA ALA ALA B B | 180 180 | . 88.845 | 93.348 | -3.390 | 1.00 |
| 2.00      | 1 . . |     |                   |         |          |        |        |      |
| ATOM 4686 | O     | O   | . ALA ALA ALA B B | 180 180 | . 89.848 | 94.046 | -3.335 | 1.00 |
| 2.55      | 1 . . |     |                   |         |          |        |        |      |

|           |     |       |                   |         |          |        |        |      |
|-----------|-----|-------|-------------------|---------|----------|--------|--------|------|
| ATOM 4687 | N   | N     | . MET MET MET B B | 181 181 | . 88.208 | 92.914 | -2.291 | 1.00 |
| 2.50      | 1   | . . . |                   |         |          |        |        |      |
| ATOM 4688 | CA  | CA    | . MET MET MET B B | 181 181 | . 88.658 | 93.242 | -0.872 | 1.00 |
| 2.17      | 1   | . . . |                   |         |          |        |        |      |
| ATOM 4689 | CB  | CB    | . MET MET MET B B | 181 181 | . 87.622 | 92.791 | 0.161  | 1.00 |
| 2.42      | 1   | . . . |                   |         |          |        |        |      |
| ATOM 4690 | CG  | CG    | . MET MET MET B B | 181 181 | . 86.275 | 93.563 | 0.118  | 1.00 |
| 2.70      | 1   | . . . |                   |         |          |        |        |      |
| ATOM 4691 | SD  | SD    | . MET MET MET B B | 181 181 | . 86.552 | 95.400 | 0.228  | 1.00 |
| 3.37      | 1   | . . . |                   |         |          |        |        |      |
| ATOM 4692 | CE  | CE    | . MET MET MET B B | 181 181 | . 87.675 | 95.436 | 1.583  | 1.00 |
| 7.07      | 1   | . . . |                   |         |          |        |        |      |
| ATOM 4693 | C   | C     | . MET MET MET B B | 181 181 | . 90.002 | 92.627 | -0.599 | 1.00 |
| 2.00      | 1   | . . . |                   |         |          |        |        |      |
| ATOM 4694 | O   | O     | . MET MET MET B B | 181 181 | . 90.925 | 93.316 | -0.108 | 1.00 |
| 2.04      | 1   | . . . |                   |         |          |        |        |      |
| ATOM 4695 | N   | N     | . ARG ARG ARG B B | 182 182 | . 90.152 | 91.352 | -1.050 | 1.00 |
| 2.25      | 1   | . . . |                   |         |          |        |        |      |
| ATOM 4696 | CA  | CA    | . ARG ARG ARG B B | 182 182 | . 91.480 | 90.735 | -0.923 | 1.00 |
| 2.67      | 1   | . . . |                   |         |          |        |        |      |
| ATOM 4697 | CB  | CB    | . ARG ARG ARG B B | 182 182 | . 91.440 | 89.280 | -1.376 | 1.00 |
| 2.58      | 1   | . . . |                   |         |          |        |        |      |
| ATOM 4698 | CG  | CG    | . ARG ARG ARG B B | 182 182 | . 92.823 | 88.586 | -1.192 | 1.00 |
| 4.96      | 1   | . . . |                   |         |          |        |        |      |
| ATOM 4699 | CD  | CD    | . ARG ARG ARG B B | 182 182 | . 92.689 | 87.171 | -1.511 | 1.00 |
| 8.98      | 1   | . . . |                   |         |          |        |        |      |
| ATOM 4700 | NE  | NE    | . ARG ARG ARG B B | 182 182 | . 92.174 | 86.927 | -2.867 | 1.00 |
| 12.80     | 1   | . . . |                   |         |          |        |        |      |
| ATOM 4701 | CZ  | CZ    | . ARG ARG ARG B B | 182 182 | . 92.932 | 86.807 | -3.961 | 1.00 |
| 17.43     | 1   | . . . |                   |         |          |        |        |      |
| ATOM 4702 | NH1 | NH1   | . ARG ARG ARG B B | 182 182 | . 94.272 | 86.964 | -3.905 | 1.00 |
| 17.07     | 1   | . . . |                   |         |          |        |        |      |
| ATOM 4703 | NH2 | NH2   | . ARG ARG ARG B B | 182 182 | . 92.355 | 86.552 | -5.134 | 1.00 |
| 20.57     | 1   | . . . |                   |         |          |        |        |      |
| ATOM 4704 | C   | C     | . ARG ARG ARG B B | 182 182 | . 92.576 | 91.510 | -1.725 | 1.00 |
| 2.00      | 1   | . . . |                   |         |          |        |        |      |
| ATOM 4705 | O   | O     | . ARG ARG ARG B B | 182 182 | . 93.649 | 91.758 | -1.239 | 1.00 |
| 2.10      | 1   | . . . |                   |         |          |        |        |      |
| ATOM 4706 | N   | N     | . LEU LEU LEU B B | 183 183 | . 92.294 | 91.838 | -2.978 | 1.00 |
| 2.87      | 1   | . . . |                   |         |          |        |        |      |
| ATOM 4707 | CA  | CA    | . LEU LEU LEU B B | 183 183 | . 93.265 | 92.469 | -3.840 | 1.00 |
| 2.92      | 1   | . . . |                   |         |          |        |        |      |
| ATOM 4708 | CB  | CB    | . LEU LEU LEU B B | 183 183 | . 92.701 | 92.711 | -5.201 | 1.00 |
| 3.98      | 1   | . . . |                   |         |          |        |        |      |
| ATOM 4709 | CG  | CG    | . LEU LEU LEU B B | 183 183 | . 92.307 | 91.503 | -6.071 | 1.00 |
| 6.92      | 1   | . . . |                   |         |          |        |        |      |
| ATOM 4710 | CD1 | CD1   | . LEU LEU LEU B B | 183 183 | . 92.402 | 91.770 | -7.629 | 1.00 |
| 6.57      | 1   | . . . |                   |         |          |        |        |      |
| ATOM 4711 | CD2 | CD2   | . LEU LEU LEU B B | 183 183 | . 92.837 | 90.115 | -5.696 | 1.00 |
| 8.15      | 1   | . . . |                   |         |          |        |        |      |
| ATOM 4712 | C   | C     | . LEU LEU LEU B B | 183 183 | . 93.631 | 93.849 | -3.269 | 1.00 |
| 2.26      | 1   | . . . |                   |         |          |        |        |      |
| ATOM 4713 | O   | O     | . LEU LEU LEU B B | 183 183 | . 94.807 | 94.196 | -3.184 | 1.00 |
| 3.18      | 1   | . . . |                   |         |          |        |        |      |

|           |       |     |                             |        |        |        |      |
|-----------|-------|-----|-----------------------------|--------|--------|--------|------|
| ATOM 4714 | N     | N   | . GLY GLY GLY B B 184 184 . | 92.612 | 94.612 | -2.841 | 1.00 |
| 2.39      | 1 . . |     |                             |        |        |        |      |
| ATOM 4715 | CA    | CA  | . GLY GLY GLY B B 184 184 . | 92.884 | 95.913 | -2.234 | 1.00 |
| 2.19      | 1 . . |     |                             |        |        |        |      |
| ATOM 4716 | C     | C   | . GLY GLY GLY B B 184 184 . | 93.721 | 95.851 | -0.960 | 1.00 |
| 2.05      | 1 . . |     |                             |        |        |        |      |
| ATOM 4717 | O     | O   | . GLY GLY GLY B B 184 184 . | 94.639 | 96.577 | -0.779 | 1.00 |
| 2.76      | 1 . . |     |                             |        |        |        |      |
| ATOM 4718 | N     | N   | . ALA ALA ALA B B 185 185 . | 93.373 | 94.908 | -0.083 | 1.00 |
| 2.44      | 1 . . |     |                             |        |        |        |      |
| ATOM 4719 | CA    | CA  | . ALA ALA ALA B B 185 185 . | 94.101 | 94.776 | 1.120  | 1.00 |
| 2.65      | 1 . . |     |                             |        |        |        |      |
| ATOM 4720 | CB    | CB  | . ALA ALA ALA B B 185 185 . | 93.334 | 93.823 | 2.040  | 1.00 |
| 2.60      | 1 . . |     |                             |        |        |        |      |
| ATOM 4721 | C     | C   | . ALA ALA ALA B B 185 185 . | 95.518 | 94.351 | 0.898  | 1.00 |
| 2.22      | 1 . . |     |                             |        |        |        |      |
| ATOM 4722 | O     | O   | . ALA ALA ALA B B 185 185 . | 96.445 | 94.858 | 1.542  | 1.00 |
| 4.46      | 1 . . |     |                             |        |        |        |      |
| ATOM 4723 | N     | N   | . GLU GLU GLU B B 186 186 . | 95.679 | 93.403 | -0.041 | 1.00 |
| 3.06      | 1 . . |     |                             |        |        |        |      |
| ATOM 4724 | CA    | CA  | . GLU GLU GLU B B 186 186 . | 97.038 | 92.992 | -0.341 | 1.00 |
| 2.53      | 1 . . |     |                             |        |        |        |      |
| ATOM 4725 | CB    | CB  | . GLU GLU GLU B B 186 186 . | 97.090 | 91.772 | -1.274 | 1.00 |
| 2.94      | 1 . . |     |                             |        |        |        |      |
| ATOM 4726 | CG    | CG  | . GLU GLU GLU B B 186 186 . | 96.604 | 90.455 | -0.563 | 1.00 |
| 2.97      | 1 . . |     |                             |        |        |        |      |
| ATOM 4727 | CD    | CD  | . GLU GLU GLU B B 186 186 . | 96.617 | 89.218 | -1.425 | 1.00 |
| 6.22      | 1 . . |     |                             |        |        |        |      |
| ATOM 4728 | OE1   | OE1 | . GLU GLU GLU B B 186 186 . | 97.153 | 89.301 | -2.539 | 1.00 |
| 8.94      | 1 . . |     |                             |        |        |        |      |
| ATOM 4729 | OE2   | OE2 | . GLU GLU GLU B B 186 186 . | 96.074 | 88.152 | -1.007 | 1.00 |
| 5.43      | 1 . . |     |                             |        |        |        |      |
| ATOM 4730 | C     | C   | . GLU GLU GLU B B 186 186 . | 97.891 | 94.082 | -0.949 | 1.00 |
| 2.55      | 1 . . |     |                             |        |        |        |      |
| ATOM 4731 | O     | O   | . GLU GLU GLU B B 186 186 . | 99.091 | 94.195 | -0.615 | 1.00 |
| 3.15      | 1 . . |     |                             |        |        |        |      |
| ATOM 4732 | N     | N   | . VAL VAL VAL B B 187 187 . | 97.294 | 94.881 | -1.818 | 1.00 |
| 2.90      | 1 . . |     |                             |        |        |        |      |
| ATOM 4733 | CA    | CA  | . VAL VAL VAL B B 187 187 . | 98.073 | 95.954 | -2.363 | 1.00 |
| 2.79      | 1 . . |     |                             |        |        |        |      |
| ATOM 4734 | CB    | CB  | . VAL VAL VAL B B 187 187 . | 97.352 | 96.618 | -3.572 | 1.00 |
| 3.62      | 1 . . |     |                             |        |        |        |      |
| ATOM 4735 | CG1   | CG1 | . VAL VAL VAL B B 187 187 . | 98.049 | 97.948 | -4.030 | 1.00 |
| 2.78      | 1 . . |     |                             |        |        |        |      |
| ATOM 4736 | CG2   | CG2 | . VAL VAL VAL B B 187 187 . | 97.240 | 95.621 | -4.755 | 1.00 |
| 3.58      | 1 . . |     |                             |        |        |        |      |
| ATOM 4737 | C     | C   | . VAL VAL VAL B B 187 187 . | 98.353 | 96.999 | -1.268 | 1.00 |
| 2.36      | 1 . . |     |                             |        |        |        |      |
| ATOM 4738 | O     | O   | . VAL VAL VAL B B 187 187 . | 99.441 | 97.574 | -1.238 | 1.00 |
| 3.07      | 1 . . |     |                             |        |        |        |      |
| ATOM 4739 | N     | N   | . TYR TYR TYR B B 188 188 . | 97.368 | 97.309 | -0.428 | 1.00 |
| 2.91      | 1 . . |     |                             |        |        |        |      |
| ATOM 4740 | CA    | CA  | . TYR TYR TYR B B 188 188 . | 97.577 | 98.210 | 0.718  | 1.00 |
| 3.27      | 1 . . |     |                             |        |        |        |      |

|           |       |     |                             |         |         |        |      |
|-----------|-------|-----|-----------------------------|---------|---------|--------|------|
| ATOM 4741 | CB    | CB  | . TYR TYR TYR B B 188 188 . | 96.259  | 98.322  | 1.555  | 1.00 |
| 3.31      | 1 . . |     |                             |         |         |        |      |
| ATOM 4742 | CG    | CG  | . TYR TYR TYR B B 188 188 . | 96.409  | 99.260  | 2.705  | 1.00 |
| 4.86      | 1 . . |     |                             |         |         |        |      |
| ATOM 4743 | CD1   | CD1 | . TYR TYR TYR B B 188 188 . | 96.197  | 100.592 | 2.561  | 1.00 |
| 2.88      | 1 . . |     |                             |         |         |        |      |
| ATOM 4744 | CE1   | CE1 | . TYR TYR TYR B B 188 188 . | 96.333  | 101.497 | 3.645  | 1.00 |
| 2.00      | 1 . . |     |                             |         |         |        |      |
| ATOM 4745 | CZ    | CZ  | . TYR TYR TYR B B 188 188 . | 96.602  | 100.979 | 4.882  | 1.00 |
| 3.31      | 1 . . |     |                             |         |         |        |      |
| ATOM 4746 | OH    | OH  | . TYR TYR TYR B B 188 188 . | 96.768  | 101.741 | 5.978  | 1.00 |
| 4.27      | 1 . . |     |                             |         |         |        |      |
| ATOM 4747 | CE2   | CE2 | . TYR TYR TYR B B 188 188 . | 96.770  | 99.655  | 5.042  | 1.00 |
| 2.13      | 1 . . |     |                             |         |         |        |      |
| ATOM 4748 | CD2   | CD2 | . TYR TYR TYR B B 188 188 . | 96.673  | 98.780  | 3.962  | 1.00 |
| 4.45      | 1 . . |     |                             |         |         |        |      |
| ATOM 4749 | C     | C   | . TYR TYR TYR B B 188 188 . | 98.777  | 97.821  | 1.610  | 1.00 |
| 3.90      | 1 . . |     |                             |         |         |        |      |
| ATOM 4750 | O     | O   | . TYR TYR TYR B B 188 188 . | 99.656  | 98.610  | 1.791  | 1.00 |
| 3.83      | 1 . . |     |                             |         |         |        |      |
| ATOM 4751 | N     | N   | . HIS HIS HIS B B 189 189 . | 98.831  | 96.542  | 2.039  | 1.00 |
| 3.10      | 1 . . |     |                             |         |         |        |      |
| ATOM 4752 | CA    | CA  | . HIS HIS HIS B B 189 189 . | 99.932  | 96.110  | 2.852  | 1.00 |
| 4.76      | 1 . . |     |                             |         |         |        |      |
| ATOM 4753 | CB    | CB  | . HIS HIS HIS B B 189 189 . | 99.655  | 94.697  | 3.445  | 1.00 |
| 3.62      | 1 . . |     |                             |         |         |        |      |
| ATOM 4754 | CG    | CG  | . HIS HIS HIS B B 189 189 . | 98.370  | 94.593  | 4.239  | 1.00 |
| 7.98      | 1 . . |     |                             |         |         |        |      |
| ATOM 4755 | ND1   | ND1 | . HIS HIS HIS B B 189 189 . | 98.073  | 95.430  | 5.293  | 1.00 |
| 12.17     | 1 . . |     |                             |         |         |        |      |
| ATOM 4756 | CE1   | CE1 | . HIS HIS HIS B B 189 189 . | 96.880  | 95.141  | 5.770  | 1.00 |
| 10.23     | 1 . . |     |                             |         |         |        |      |
| ATOM 4757 | NE2   | NE2 | . HIS HIS HIS B B 189 189 . | 96.415  | 94.095  | 5.103  | 1.00 |
| 13.00     | 1 . . |     |                             |         |         |        |      |
| ATOM 4758 | CD2   | CD2 | . HIS HIS HIS B B 189 189 . | 97.327  | 93.731  | 4.141  | 1.00 |
| 10.40     | 1 . . |     |                             |         |         |        |      |
| ATOM 4759 | C     | C   | . HIS HIS HIS B B 189 189 . | 101.233 | 96.113  | 2.066  | 1.00 |
| 4.15      | 1 . . |     |                             |         |         |        |      |
| ATOM 4760 | O     | O   | . HIS HIS HIS B B 189 189 . | 102.297 | 96.469  | 2.607  | 1.00 |
| 5.29      | 1 . . |     |                             |         |         |        |      |
| ATOM 4761 | N     | N   | . THR THR THR B B 190 190 . | 101.180 | 95.775  | 0.766  | 1.00 |
| 3.15      | 1 . . |     |                             |         |         |        |      |
| ATOM 4762 | CA    | CA  | . THR THR THR B B 190 190 . | 102.411 | 95.884  | -0.053 | 1.00 |
| 4.32      | 1 . . |     |                             |         |         |        |      |
| ATOM 4763 | CB    | CB  | . THR THR THR B B 190 190 . | 102.125 | 95.373  | -1.484 | 1.00 |
| 3.54      | 1 . . |     |                             |         |         |        |      |
| ATOM 4764 | OG1   | OG1 | . THR THR THR B B 190 190 . | 101.654 | 94.020  | -1.448 | 1.00 |
| 7.40      | 1 . . |     |                             |         |         |        |      |
| ATOM 4765 | CG2   | CG2 | . THR THR THR B B 190 190 . | 103.354 | 95.431  | -2.373 | 1.00 |
| 6.56      | 1 . . |     |                             |         |         |        |      |
| ATOM 4766 | C     | C   | . THR THR THR B B 190 190 . | 102.883 | 97.349  | -0.142 | 1.00 |
| 4.68      | 1 . . |     |                             |         |         |        |      |
| ATOM 4767 | O     | O   | . THR THR THR B B 190 190 . | 104.090 | 97.636  | 0.036  | 1.00 |
| 5.00      | 1 . . |     |                             |         |         |        |      |

|           |       |     |                             |         |         |        |      |
|-----------|-------|-----|-----------------------------|---------|---------|--------|------|
| ATOM 4768 | N     | N   | . LEU LEU LEU B B 191 191 . | 101.934 | 98.279  | -0.281 | 1.00 |
| 3.34      | 1 . . |     |                             |         |         |        |      |
| ATOM 4769 | CA    | CA  | . LEU LEU LEU B B 191 191 . | 102.301 | 99.713  | -0.402 | 1.00 |
| 2.66      | 1 . . |     |                             |         |         |        |      |
| ATOM 4770 | CB    | CB  | . LEU LEU LEU B B 191 191 . | 101.027 | 100.469 | -0.734 | 1.00 |
| 3.68      | 1 . . |     |                             |         |         |        |      |
| ATOM 4771 | CG    | CG  | . LEU LEU LEU B B 191 191 . | 101.193 | 101.961 | -0.717 | 1.00 |
| 3.77      | 1 . . |     |                             |         |         |        |      |
| ATOM 4772 | CD1   | CD1 | . LEU LEU LEU B B 191 191 . | 102.257 | 102.480 | -1.728 | 1.00 |
| 4.66      | 1 . . |     |                             |         |         |        |      |
| ATOM 4773 | CD2   | CD2 | . LEU LEU LEU B B 191 191 . | 99.793  | 102.460 | -1.006 | 1.00 |
| 4.73      | 1 . . |     |                             |         |         |        |      |
| ATOM 4774 | C     | C   | . LEU LEU LEU B B 191 191 . | 102.984 | 100.196 | 0.881  | 1.00 |
| 2.50      | 1 . . |     |                             |         |         |        |      |
| ATOM 4775 | O     | O   | . LEU LEU LEU B B 191 191 . | 103.925 | 100.937 | 0.878  | 1.00 |
| 4.59      | 1 . . |     |                             |         |         |        |      |
| ATOM 4776 | N     | N   | . LYS LYS LYS B B 192 192 . | 102.515 | 99.687  | 2.038  | 1.00 |
| 2.89      | 1 . . |     |                             |         |         |        |      |
| ATOM 4777 | CA    | CA  | . LYS LYS LYS B B 192 192 . | 103.107 | 100.085 | 3.315  | 1.00 |
| 4.27      | 1 . . |     |                             |         |         |        |      |
| ATOM 4778 | CB    | CB  | . LYS LYS LYS B B 192 192 . | 102.321 | 99.482  | 4.518  | 1.00 |
| 4.73      | 1 . . |     |                             |         |         |        |      |
| ATOM 4779 | CG    | CG  | . LYS LYS LYS B B 192 192 . | 102.826 | 99.986  | 5.873  | 1.00 |
| 5.43      | 1 . . |     |                             |         |         |        |      |
| ATOM 4780 | CD    | CD  | . LYS LYS LYS B B 192 192 . | 101.966 | 99.486  | 6.981  | 1.00 |
| 6.32      | 1 . . |     |                             |         |         |        |      |
| ATOM 4781 | CE    | CE  | . LYS LYS LYS B B 192 192 . | 102.393 | 100.103 | 8.292  | 1.00 |
| 8.64      | 1 . . |     |                             |         |         |        |      |
| ATOM 4782 | NZ    | NZ  | . LYS LYS LYS B B 192 192 . | 101.594 | 99.474  | 9.385  | 1.00 |
| 11.76     | 1 . . |     |                             |         |         |        |      |
| ATOM 4783 | C     | C   | . LYS LYS LYS B B 192 192 . | 104.597 | 99.781  | 3.288  | 1.00 |
| 4.26      | 1 . . |     |                             |         |         |        |      |
| ATOM 4784 | O     | O   | . LYS LYS LYS B B 192 192 . | 105.441 | 100.554 | 3.742  | 1.00 |
| 4.99      | 1 . . |     |                             |         |         |        |      |
| ATOM 4785 | N     | N   | . GLY GLY GLY B B 193 193 . | 104.930 | 98.609  | 2.812  | 1.00 |
| 5.31      | 1 . . |     |                             |         |         |        |      |
| ATOM 4786 | CA    | CA  | . GLY GLY GLY B B 193 193 . | 106.339 | 98.283  | 2.754  | 1.00 |
| 5.80      | 1 . . |     |                             |         |         |        |      |
| ATOM 4787 | C     | C   | . GLY GLY GLY B B 193 193 . | 107.137 | 99.020  | 1.704  | 1.00 |
| 6.58      | 1 . . |     |                             |         |         |        |      |
| ATOM 4788 | O     | O   | . GLY GLY GLY B B 193 193 . | 108.291 | 99.338  | 1.913  | 1.00 |
| 10.26     | 1 . . |     |                             |         |         |        |      |
| ATOM 4789 | N     | N   | . VAL VAL VAL B B 194 194 . | 106.545 | 99.307  | 0.570  | 1.00 |
| 6.32      | 1 . . |     |                             |         |         |        |      |
| ATOM 4790 | CA    | CA  | . VAL VAL VAL B B 194 194 . | 107.231 | 100.135 | -0.430 | 1.00 |
| 6.15      | 1 . . |     |                             |         |         |        |      |
| ATOM 4791 | CB    | CB  | . VAL VAL VAL B B 194 194 . | 106.312 | 100.264 | -1.599 | 1.00 |
| 6.81      | 1 . . |     |                             |         |         |        |      |
| ATOM 4792 | CG1   | CG1 | . VAL VAL VAL B B 194 194 . | 106.856 | 101.319 | -2.626 | 1.00 |
| 8.30      | 1 . . |     |                             |         |         |        |      |
| ATOM 4793 | CG2   | CG2 | . VAL VAL VAL B B 194 194 . | 106.076 | 98.888  | -2.233 | 1.00 |
| 10.00     | 1 . . |     |                             |         |         |        |      |
| ATOM 4794 | C     | C   | . VAL VAL VAL B B 194 194 . | 107.565 | 101.533 | 0.125  | 1.00 |
| 7.47      | 1 . . |     |                             |         |         |        |      |

|           |       |     |                   |         |                          |      |
|-----------|-------|-----|-------------------|---------|--------------------------|------|
| ATOM 4795 | O     | O   | . VAL VAL VAL B B | 194 194 | . 108.683 102.072 -0.036 | 1.00 |
| 9.66      | 1 . . |     |                   |         |                          |      |
| ATOM 4796 | N     | N   | . ILE ILE ILE B B | 195 195 | . 106.614 102.099 0.858  | 1.00 |
| 8.06      | 1 . . |     |                   |         |                          |      |
| ATOM 4797 | CA    | CA  | . ILE ILE ILE B B | 195 195 | . 106.814 103.427 1.494  | 1.00 |
| 7.82      | 1 . . |     |                   |         |                          |      |
| ATOM 4798 | CB    | CB  | . ILE ILE ILE B B | 195 195 | . 105.458 103.987 2.035  | 1.00 |
| 6.40      | 1 . . |     |                   |         |                          |      |
| ATOM 4799 | CG1   | CG1 | . ILE ILE ILE B B | 195 195 | . 104.553 104.393 0.858  | 1.00 |
| 7.94      | 1 . . |     |                   |         |                          |      |
| ATOM 4800 | CD1   | CD1 | . ILE ILE ILE B B | 195 195 | . 103.176 104.763 1.182  | 1.00 |
| 7.09      | 1 . . |     |                   |         |                          |      |
| ATOM 4801 | CG2   | CG2 | . ILE ILE ILE B B | 195 195 | . 105.734 105.184 2.950  | 1.00 |
| 7.69      | 1 . . |     |                   |         |                          |      |
| ATOM 4802 | C     | C   | . ILE ILE ILE B B | 195 195 | . 107.873 103.371 2.593  | 1.00 |
| 9.25      | 1 . . |     |                   |         |                          |      |
| ATOM 4803 | O     | O   | . ILE ILE ILE B B | 195 195 | . 108.800 104.268 2.690  | 1.00 |
| 10.04     | 1 . . |     |                   |         |                          |      |
| ATOM 4804 | N     | N   | . LYS LYS LYS B B | 196 196 | . 107.752 102.331 3.440  | 1.00 |
| 10.11     | 1 . . |     |                   |         |                          |      |
| ATOM 4805 | CA    | CA  | . LYS LYS LYS B B | 196 196 | . 108.717 102.145 4.511  | 1.00 |
| 10.49     | 1 . . |     |                   |         |                          |      |
| ATOM 4806 | CB    | CB  | . LYS LYS LYS B B | 196 196 | . 108.347 100.928 5.402  | 1.00 |
| 11.53     | 1 . . |     |                   |         |                          |      |
| ATOM 4807 | CG    | CG  | . LYS LYS LYS B B | 196 196 | . 109.322 100.626 6.572  | 1.00 |
| 10.61     | 1 . . |     |                   |         |                          |      |
| ATOM 4808 | CD    | CD  | . LYS LYS LYS B B | 196 196 | . 109.033 99.211 7.147   | 1.00 |
| 15.90     | 1 . . |     |                   |         |                          |      |
| ATOM 4809 | CE    | CE  | . LYS LYS LYS B B | 196 196 | . 110.109 98.819 8.230   | 1.00 |
| 21.87     | 1 . . |     |                   |         |                          |      |
| ATOM 4810 | NZ    | NZ  | . LYS LYS LYS B B | 196 196 | . 110.334 97.340 8.376   | 1.00 |
| 21.29     | 1 . . |     |                   |         |                          |      |
| ATOM 4811 | C     | C   | . LYS LYS LYS B B | 196 196 | . 110.115 102.011 3.867  | 1.00 |
| 10.10     | 1 . . |     |                   |         |                          |      |
| ATOM 4812 | O     | O   | . LYS LYS LYS B B | 196 196 | . 111.090 102.617 4.360  | 1.00 |
| 8.96      | 1 . . |     |                   |         |                          |      |
| ATOM 4813 | N     | N   | . ASP ASP ASP B B | 197 197 | . 110.220 101.295 2.737  | 1.00 |
| 11.03     | 1 . . |     |                   |         |                          |      |
| ATOM 4814 | CA    | CA  | . ASP ASP ASP B B | 197 197 | . 111.581 100.973 2.240  | 1.00 |
| 12.03     | 1 . . |     |                   |         |                          |      |
| ATOM 4815 | CB    | CB  | . ASP ASP ASP B B | 197 197 | . 111.570 99.884 1.192   | 1.00 |
| 13.89     | 1 . . |     |                   |         |                          |      |
| ATOM 4816 | CG    | CG  | . ASP ASP ASP B B | 197 197 | . 111.271 98.505 1.745   | 1.00 |
| 14.66     | 1 . . |     |                   |         |                          |      |
| ATOM 4817 | OD1   | OD1 | . ASP ASP ASP B B | 197 197 | . 110.985 97.651 0.896   | 1.00 |
| 16.49     | 1 . . |     |                   |         |                          |      |
| ATOM 4818 | OD2   | OD2 | . ASP ASP ASP B B | 197 197 | . 111.357 98.257 2.981   | 1.00 |
| 17.78     | 1 . . |     |                   |         |                          |      |
| ATOM 4819 | C     | C   | . ASP ASP ASP B B | 197 197 | . 112.168 102.224 1.666  | 1.00 |
| 12.86     | 1 . . |     |                   |         |                          |      |
| ATOM 4820 | O     | O   | . ASP ASP ASP B B | 197 197 | . 113.344 102.429 1.802  | 1.00 |
| 14.09     | 1 . . |     |                   |         |                          |      |
| ATOM 4821 | N     | N   | . LYS LYS LYS B B | 198 198 | . 111.326 103.085 1.104  | 1.00 |
| 9.59      | 1 . . |     |                   |         |                          |      |

|           |       |     |                             |         |         |        |      |
|-----------|-------|-----|-----------------------------|---------|---------|--------|------|
| ATOM 4822 | CA    | CA  | . LYS LYS LYS B B 198 198 . | 111.862 | 104.287 | 0.448  | 1.00 |
| 7.64      | 1 . . |     |                             |         |         |        |      |
| ATOM 4823 | CB    | CB  | . LYS LYS LYS B B 198 198 . | 111.043 | 104.672 | -0.789 | 1.00 |
| 7.85      | 1 . . |     |                             |         |         |        |      |
| ATOM 4824 | CG    | CG  | . LYS LYS LYS B B 198 198 . | 111.702 | 105.769 | -1.609 | 1.00 |
| 10.07     | 1 . . |     |                             |         |         |        |      |
| ATOM 4825 | CD    | CD  | . LYS LYS LYS B B 198 198 . | 110.882 | 106.055 | -2.795 | 1.00 |
| 13.57     | 1 . . |     |                             |         |         |        |      |
| ATOM 4826 | CE    | CE  | . LYS LYS LYS B B 198 198 . | 111.532 | 107.119 | -3.728 | 1.00 |
| 17.37     | 1 . . |     |                             |         |         |        |      |
| ATOM 4827 | NZ    | NZ  | . LYS LYS LYS B B 198 198 . | 110.605 | 107.290 | -4.883 | 1.00 |
| 21.15     | 1 . . |     |                             |         |         |        |      |
| ATOM 4828 | C     | C   | . LYS LYS LYS B B 198 198 . | 111.975 | 105.477 | 1.389  | 1.00 |
| 7.87      | 1 . . |     |                             |         |         |        |      |
| ATOM 4829 | O     | O   | . LYS LYS LYS B B 198 198 . | 112.938 | 106.208 | 1.344  | 1.00 |
| 11.09     | 1 . . |     |                             |         |         |        |      |
| ATOM 4830 | N     | N   | . TYR TYR TYR B B 199 199 . | 110.970 | 105.656 | 2.254  | 1.00 |
| 6.74      | 1 . . |     |                             |         |         |        |      |
| ATOM 4831 | CA    | CA  | . TYR TYR TYR B B 199 199 . | 110.844 | 106.892 | 3.034  | 1.00 |
| 7.76      | 1 . . |     |                             |         |         |        |      |
| ATOM 4832 | CB    | CB  | . TYR TYR TYR B B 199 199 . | 109.474 | 107.542 | 2.851  | 1.00 |
| 9.17      | 1 . . |     |                             |         |         |        |      |
| ATOM 4833 | CG    | CG  | . TYR TYR TYR B B 199 199 . | 109.209 | 107.961 | 1.449  | 1.00 |
| 6.70      | 1 . . |     |                             |         |         |        |      |
| ATOM 4834 | CD1   | CD1 | . TYR TYR TYR B B 199 199 . | 108.427 | 107.186 | 0.575  | 1.00 |
| 8.94      | 1 . . |     |                             |         |         |        |      |
| ATOM 4835 | CE1   | CE1 | . TYR TYR TYR B B 199 199 . | 108.205 | 107.550 | -0.718 | 1.00 |
| 8.29      | 1 . . |     |                             |         |         |        |      |
| ATOM 4836 | CZ    | CZ  | . TYR TYR TYR B B 199 199 . | 108.796 | 108.727 | -1.187 | 1.00 |
| 14.45     | 1 . . |     |                             |         |         |        |      |
| ATOM 4837 | OH    | OH  | . TYR TYR TYR B B 199 199 . | 108.631 | 109.169 | -2.479 | 1.00 |
| 20.17     | 1 . . |     |                             |         |         |        |      |
| ATOM 4838 | CE2   | CE2 | . TYR TYR TYR B B 199 199 . | 109.565 | 109.520 | -0.355 | 1.00 |
| 15.01     | 1 . . |     |                             |         |         |        |      |
| ATOM 4839 | CD2   | CD2 | . TYR TYR TYR B B 199 199 . | 109.775 | 109.126 | 0.964  | 1.00 |
| 10.31     | 1 . . |     |                             |         |         |        |      |
| ATOM 4840 | C     | C   | . TYR TYR TYR B B 199 199 . | 111.119 | 106.660 | 4.515  | 1.00 |
| 8.76      | 1 . . |     |                             |         |         |        |      |
| ATOM 4841 | O     | O   | . TYR TYR TYR B B 199 199 . | 111.250 | 107.600 | 5.267  | 1.00 |
| 9.81      | 1 . . |     |                             |         |         |        |      |
| ATOM 4842 | N     | N   | . GLY GLY GLY B B 200 200 . | 111.220 | 105.408 | 4.936  | 1.00 |
| 9.15      | 1 . . |     |                             |         |         |        |      |
| ATOM 4843 | CA    | CA  | . GLY GLY GLY B B 200 200 . | 111.367 | 105.147 | 6.358  | 1.00 |
| 9.28      | 1 . . |     |                             |         |         |        |      |
| ATOM 4844 | C     | C   | . GLY GLY GLY B B 200 200 . | 110.038 | 104.927 | 7.098  | 1.00 |
| 11.57     | 1 . . |     |                             |         |         |        |      |
| ATOM 4845 | O     | O   | . GLY GLY GLY B B 200 200 . | 108.959 | 105.292 | 6.623  | 1.00 |
| 10.70     | 1 . . |     |                             |         |         |        |      |
| ATOM 4846 | N     | N   | . LYS LYS LYS B B 201 201 . | 110.145 | 104.292 | 8.267  | 1.00 |
| 13.34     | 1 . . |     |                             |         |         |        |      |
| ATOM 4847 | CA    | CA  | . LYS LYS LYS B B 201 201 . | 108.987 | 103.918 | 9.071  | 1.00 |
| 14.53     | 1 . . |     |                             |         |         |        |      |
| ATOM 4848 | CB    | CB  | . LYS LYS LYS B B 201 201 . | 109.425 | 103.121 | 10.338 | 1.00 |
| 16.08     | 1 . . |     |                             |         |         |        |      |







|           |       |     |                             |         |         |       |      |
|-----------|-------|-----|-----------------------------|---------|---------|-------|------|
| ATOM 4903 | CA    | CA  | . GLU GLU GLU B B 209 209 . | 90.711  | 107.835 | 5.391 | 1.00 |
| 2.64      | 1 . . |     |                             |         |         |       |      |
| ATOM 4904 | CB    | CB  | . GLU GLU GLU B B 209 209 . | 90.354  | 108.242 | 3.965 | 1.00 |
| 4.08      | 1 . . |     |                             |         |         |       |      |
| ATOM 4905 | CG    | CG  | . GLU GLU GLU B B 209 209 . | 89.334  | 109.392 | 3.998 | 1.00 |
| 3.98      | 1 . . |     |                             |         |         |       |      |
| ATOM 4906 | CD    | CD  | . GLU GLU GLU B B 209 209 . | 88.738  | 109.724 | 2.634 | 1.00 |
| 7.01      | 1 . . |     |                             |         |         |       |      |
| ATOM 4907 | OE1   | OE1 | . GLU GLU GLU B B 209 209 . | 89.087  | 109.152 | 1.580 | 1.00 |
| 6.61      | 1 . . |     |                             |         |         |       |      |
| ATOM 4908 | OE2   | OE2 | . GLU GLU GLU B B 209 209 . | 87.877  | 110.624 | 2.616 | 1.00 |
| 11.64     | 1 . . |     |                             |         |         |       |      |
| ATOM 4909 | C     | C   | . GLU GLU GLU B B 209 209 . | 91.471  | 106.512 | 5.391 | 1.00 |
| 2.01      | 1 . . |     |                             |         |         |       |      |
| ATOM 4910 | O     | O   | . GLU GLU GLU B B 209 209 . | 91.048  | 105.605 | 4.669 | 1.00 |
| 2.94      | 1 . . |     |                             |         |         |       |      |
| ATOM 4911 | N     | N   | . GLY GLY GLY B B 210 210 . | 92.553  | 106.460 | 6.156 | 1.00 |
| 3.00      | 1 . . |     |                             |         |         |       |      |
| ATOM 4912 | CA    | CA  | . GLY GLY GLY B B 210 210 . | 93.335  | 105.267 | 6.359 | 1.00 |
| 2.32      | 1 . . |     |                             |         |         |       |      |
| ATOM 4913 | C     | C   | . GLY GLY GLY B B 210 210 . | 94.472  | 104.977 | 5.386 | 1.00 |
| 2.73      | 1 . . |     |                             |         |         |       |      |
| ATOM 4914 | O     | O   | . GLY GLY GLY B B 210 210 . | 95.094  | 103.914 | 5.541 | 1.00 |
| 3.93      | 1 . . |     |                             |         |         |       |      |
| ATOM 4915 | N     | N   | . GLY GLY GLY B B 211 211 . | 94.770  | 105.922 | 4.490 | 1.00 |
| 2.69      | 1 . . |     |                             |         |         |       |      |
| ATOM 4916 | CA    | CA  | . GLY GLY GLY B B 211 211 . | 95.868  | 105.751 | 3.554 | 1.00 |
| 4.55      | 1 . . |     |                             |         |         |       |      |
| ATOM 4917 | C     | C   | . GLY GLY GLY B B 211 211 . | 97.094  | 106.428 | 4.094 | 1.00 |
| 5.33      | 1 . . |     |                             |         |         |       |      |
| ATOM 4918 | O     | O   | . GLY GLY GLY B B 211 211 . | 97.053  | 107.010 | 5.129 | 1.00 |
| 4.99      | 1 . . |     |                             |         |         |       |      |
| ATOM 4919 | N     | N   | . PHE PHE PHE B B 212 212 . | 98.227  | 106.311 | 3.404 | 1.00 |
| 9.12      | 1 . . |     |                             |         |         |       |      |
| ATOM 4920 | CA    | CA  | . PHE PHE PHE B B 212 212 . | 99.473  | 106.965 | 3.785 | 1.00 |
| 11.58     | 1 . . |     |                             |         |         |       |      |
| ATOM 4921 | CB    | CB  | . PHE PHE PHE B B 212 212 . | 100.689 | 106.020 | 3.550 | 1.00 |
| 11.04     | 1 . . |     |                             |         |         |       |      |
| ATOM 4922 | CG    | CG  | . PHE PHE PHE B B 212 212 . | 100.436 | 104.597 | 3.955 | 1.00 |
| 11.81     | 1 . . |     |                             |         |         |       |      |
| ATOM 4923 | CD1   | CD1 | . PHE PHE PHE B B 212 212 . | 99.984  | 103.667 | 3.032 | 1.00 |
| 11.12     | 1 . . |     |                             |         |         |       |      |
| ATOM 4924 | CE1   | CE1 | . PHE PHE PHE B B 212 212 . | 99.733  | 102.335 | 3.369 | 1.00 |
| 12.50     | 1 . . |     |                             |         |         |       |      |
| ATOM 4925 | CZ    | CZ  | . PHE PHE PHE B B 212 212 . | 99.927  | 101.932 | 4.696 | 1.00 |
| 13.34     | 1 . . |     |                             |         |         |       |      |
| ATOM 4926 | CE2   | CE2 | . PHE PHE PHE B B 212 212 . | 100.384 | 102.858 | 5.659 | 1.00 |
| 15.45     | 1 . . |     |                             |         |         |       |      |
| ATOM 4927 | CD2   | CD2 | . PHE PHE PHE B B 212 212 . | 100.631 | 104.197 | 5.287 | 1.00 |
| 14.74     | 1 . . |     |                             |         |         |       |      |
| ATOM 4928 | C     | C   | . PHE PHE PHE B B 212 212 . | 99.749  | 108.367 | 3.213 | 1.00 |
| 13.38     | 1 . . |     |                             |         |         |       |      |
| ATOM 4929 | O     | O   | . PHE PHE PHE B B 212 212 . | 99.272  | 108.713 | 2.136 | 1.00 |
| 13.84     | 1 . . |     |                             |         |         |       |      |

|           |       |     |                   |         |                          |      |
|-----------|-------|-----|-------------------|---------|--------------------------|------|
| ATOM 4930 | N     | N   | . ALA ALA ALA B B | 213 213 | . 100.477 109.197 3.975  | 1.00 |
| 15.38     | 1 . . |     |                   |         |                          |      |
| ATOM 4931 | CA    | CA  | . ALA ALA ALA B B | 213 213 | . 100.862 110.546 3.524  | 1.00 |
| 17.53     | 1 . . |     |                   |         |                          |      |
| ATOM 4932 | CB    | CB  | . ALA ALA ALA B B | 213 213 | . 100.224 111.599 4.365  | 1.00 |
| 15.81     | 1 . . |     |                   |         |                          |      |
| ATOM 4933 | C     | C   | . ALA ALA ALA B B | 213 213 | . 102.351 110.698 3.566  | 1.00 |
| 17.53     | 1 . . |     |                   |         |                          |      |
| ATOM 4934 | O     | O   | . ALA ALA ALA B B | 213 213 | . 102.897 111.548 4.293  | 1.00 |
| 17.55     | 1 . . |     |                   |         |                          |      |
| ATOM 4935 | N     | N   | . PRO PRO PRO B B | 214 214 | . 103.050 109.897 2.766  | 1.00 |
| 17.69     | 1 . . |     |                   |         |                          |      |
| ATOM 4936 | CA    | CA  | . PRO PRO PRO B B | 214 214 | . 104.453 110.050 2.819  | 1.00 |
| 18.42     | 1 . . |     |                   |         |                          |      |
| ATOM 4937 | CB    | CB  | . PRO PRO PRO B B | 214 214 | . 104.939 109.081 1.738  | 1.00 |
| 18.21     | 1 . . |     |                   |         |                          |      |
| ATOM 4938 | CG    | CG  | . PRO PRO PRO B B | 214 214 | . 103.850 108.905 0.845  | 1.00 |
| 18.56     | 1 . . |     |                   |         |                          |      |
| ATOM 4939 | CD    | CD  | . PRO PRO PRO B B | 214 214 | . 102.612 109.067 1.635  | 1.00 |
| 17.81     | 1 . . |     |                   |         |                          |      |
| ATOM 4940 | C     | C   | . PRO PRO PRO B B | 214 214 | . 104.767 111.503 2.499  | 1.00 |
| 19.55     | 1 . . |     |                   |         |                          |      |
| ATOM 4941 | O     | O   | . PRO PRO PRO B B | 214 214 | . 103.945 112.216 1.877  | 1.00 |
| 20.73     | 1 . . |     |                   |         |                          |      |
| ATOM 4942 | N     | N   | . ASN ASN ASN B B | 215 215 | . 105.933 111.949 2.954  | 1.00 |
| 20.06     | 1 . . |     |                   |         |                          |      |
| ATOM 4943 | CA    | CA  | . ASN ASN ASN B B | 215 215 | . 106.375 113.310 2.800  | 1.00 |
| 20.66     | 1 . . |     |                   |         |                          |      |
| ATOM 4944 | CB    | CB  | . ASN ASN ASN B B | 215 215 | . 107.427 113.661 3.900  | 1.00 |
| 21.86     | 1 . . |     |                   |         |                          |      |
| ATOM 4945 | CG    | CG  | . ASN ASN ASN B B | 215 215 | . 108.460 112.505 4.199  | 1.00 |
| 24.08     | 1 . . |     |                   |         |                          |      |
| ATOM 4946 | OD1   | OD1 | . ASN ASN ASN B B | 215 215 | . 109.674 112.783 4.331  | 1.00 |
| 28.79     | 1 . . |     |                   |         |                          |      |
| ATOM 4947 | ND2   | ND2 | . ASN ASN ASN B B | 215 215 | . 107.982 111.214 4.315  | 1.00 |
| 19.36     | 1 . . |     |                   |         |                          |      |
| ATOM 4948 | C     | C   | . ASN ASN ASN B B | 215 215 | . 106.842 113.586 1.371  | 1.00 |
| 20.25     | 1 . . |     |                   |         |                          |      |
| ATOM 4949 | O     | O   | . ASN ASN ASN B B | 215 215 | . 108.036 113.672 1.087  | 1.00 |
| 20.36     | 1 . . |     |                   |         |                          |      |
| ATOM 4950 | N     | N   | . ILE ILE ILE B B | 216 216 | . 105.884 113.709 0.445  | 1.00 |
| 19.73     | 1 . . |     |                   |         |                          |      |
| ATOM 4951 | CA    | CA  | . ILE ILE ILE B B | 216 216 | . 106.204 114.036 -0.976 | 1.00 |
| 19.59     | 1 . . |     |                   |         |                          |      |
| ATOM 4952 | CB    | CB  | . ILE ILE ILE B B | 216 216 | . 106.024 112.807 -1.914 | 1.00 |
| 18.82     | 1 . . |     |                   |         |                          |      |
| ATOM 4953 | CG1   | CG1 | . ILE ILE ILE B B | 216 216 | . 104.678 112.115 -1.612 | 1.00 |
| 19.51     | 1 . . |     |                   |         |                          |      |
| ATOM 4954 | CD1   | CD1 | . ILE ILE ILE B B | 216 216 | . 104.074 111.287 -2.754 | 1.00 |
| 10.71     | 1 . . |     |                   |         |                          |      |
| ATOM 4955 | CG2   | CG2 | . ILE ILE ILE B B | 216 216 | . 107.200 111.836 -1.715 | 1.00 |
| 19.75     | 1 . . |     |                   |         |                          |      |
| ATOM 4956 | C     | C   | . ILE ILE ILE B B | 216 216 | . 105.480 115.276 -1.571 | 1.00 |
| 20.11     | 1 . . |     |                   |         |                          |      |

|           |     |       |                             |         |         |        |      |
|-----------|-----|-------|-----------------------------|---------|---------|--------|------|
| ATOM 4957 | O   | O     | . ILE ILE ILE B B 216 216 . | 104.479 | 115.707 | -1.057 | 1.00 |
| 19.82     | 1   | . . . |                             |         |         |        |      |
| ATOM 4958 | N   | N     | . LEU LEU LEU B B 217 217 . | 106.013 | 115.853 | -2.629 | 1.00 |
| 20.95     | 1   | . . . |                             |         |         |        |      |
| ATOM 4959 | CA  | CA    | . LEU LEU LEU B B 217 217 . | 105.335 | 116.998 | -3.218 | 1.00 |
| 22.19     | 1   | . . . |                             |         |         |        |      |
| ATOM 4960 | CB  | CB    | . LEU LEU LEU B B 217 217 . | 106.325 | 118.125 | -3.536 | 1.00 |
| 23.12     | 1   | . . . |                             |         |         |        |      |
| ATOM 4961 | CG  | CG    | . LEU LEU LEU B B 217 217 . | 105.910 | 119.452 | -4.176 | 1.00 |
| 23.39     | 1   | . . . |                             |         |         |        |      |
| ATOM 4962 | CD1 | CD1   | . LEU LEU LEU B B 217 217 . | 104.643 | 120.089 | -3.541 | 1.00 |
| 22.19     | 1   | . . . |                             |         |         |        |      |
| ATOM 4963 | CD2 | CD2   | . LEU LEU LEU B B 217 217 . | 107.117 | 120.381 | -4.062 | 1.00 |
| 23.39     | 1   | . . . |                             |         |         |        |      |
| ATOM 4964 | C   | C     | . LEU LEU LEU B B 217 217 . | 104.655 | 116.507 | -4.465 | 1.00 |
| 22.93     | 1   | . . . |                             |         |         |        |      |
| ATOM 4965 | O   | O     | . LEU LEU LEU B B 217 217 . | 103.417 | 116.511 | -4.528 | 1.00 |
| 23.66     | 1   | . . . |                             |         |         |        |      |
| ATOM 4966 | N   | N     | . GLU GLU GLU B B 218 218 . | 105.480 | 116.011 | -5.394 | 1.00 |
| 21.81     | 1   | . . . |                             |         |         |        |      |
| ATOM 4967 | CA  | CA    | . GLU GLU GLU B B 218 218 . | 105.076 | 115.538 | -6.724 | 1.00 |
| 20.51     | 1   | . . . |                             |         |         |        |      |
| ATOM 4968 | CB  | CB    | . GLU GLU GLU B B 218 218 . | 106.298 | 114.992 | -7.502 | 1.00 |
| 22.51     | 1   | . . . |                             |         |         |        |      |
| ATOM 4969 | CG  | CG    | . GLU GLU GLU B B 218 218 . | 107.503 | 116.015 | -7.743 | 1.00 |
| 26.57     | 1   | . . . |                             |         |         |        |      |
| ATOM 4970 | CD  | CD    | . GLU GLU GLU B B 218 218 . | 107.305 | 116.989 | -8.942 | 1.00 |
| 30.29     | 1   | . . . |                             |         |         |        |      |
| ATOM 4971 | OE1 | OE1   | . GLU GLU GLU B B 218 218 . | 106.577 | 116.656 | -9.913 | 1.00 |
| 31.98     | 1   | . . . |                             |         |         |        |      |
| ATOM 4972 | OE2 | OE2   | . GLU GLU GLU B B 218 218 . | 107.889 | 118.099 | -8.913 | 1.00 |
| 30.13     | 1   | . . . |                             |         |         |        |      |
| ATOM 4973 | C   | C     | . GLU GLU GLU B B 218 218 . | 103.932 | 114.524 | -6.696 | 1.00 |
| 18.31     | 1   | . . . |                             |         |         |        |      |
| ATOM 4974 | O   | O     | . GLU GLU GLU B B 218 218 . | 104.017 | 113.450 | -6.036 | 1.00 |
| 18.12     | 1   | . . . |                             |         |         |        |      |
| ATOM 4975 | N   | N     | . ASN ASN ASN B B 219 219 . | 102.861 | 114.845 | -7.433 | 1.00 |
| 15.41     | 1   | . . . |                             |         |         |        |      |
| ATOM 4976 | CA  | CA    | . ASN ASN ASN B B 219 219 . | 101.694 | 113.932 | -7.507 | 1.00 |
| 12.56     | 1   | . . . |                             |         |         |        |      |
| ATOM 4977 | CB  | CB    | . ASN ASN ASN B B 219 219 . | 100.437 | 114.637 | -8.033 | 1.00 |
| 12.00     | 1   | . . . |                             |         |         |        |      |
| ATOM 4978 | CG  | CG    | . ASN ASN ASN B B 219 219 . | 100.042 | 115.800 | -7.176 | 1.00 |
| 9.93      | 1   | . . . |                             |         |         |        |      |
| ATOM 4979 | OD1 | OD1   | . ASN ASN ASN B B 219 219 . | 99.350  | 115.632 | -6.198 | 1.00 |
| 12.05     | 1   | . . . |                             |         |         |        |      |
| ATOM 4980 | ND2 | ND2   | . ASN ASN ASN B B 219 219 . | 100.414 | 116.986 | -7.588 | 1.00 |
| 13.51     | 1   | . . . |                             |         |         |        |      |
| ATOM 4981 | C   | C     | . ASN ASN ASN B B 219 219 . | 102.000 | 112.716 | -8.394 | 1.00 |
| 12.30     | 1   | . . . |                             |         |         |        |      |
| ATOM 4982 | O   | O     | . ASN ASN ASN B B 219 219 . | 101.383 | 111.635 | -8.242 | 1.00 |
| 11.31     | 1   | . . . |                             |         |         |        |      |
| ATOM 4983 | N   | N     | . SER SER SER B B 220 220 . | 102.967 | 112.901 | -9.285 | 1.00 |
| 11.74     | 1   | . . . |                             |         |         |        |      |

|           |       |     |                             |         |         |         |      |
|-----------|-------|-----|-----------------------------|---------|---------|---------|------|
| ATOM 4984 | CA    | CA  | . SER SER SER B B 220 220 . | 103.491 | 111.839 | -10.117 | 1.00 |
| 12.00     | 1 . . |     |                             |         |         |         |      |
| ATOM 4985 | CB    | CB  | . SER SER SER B B 220 220 . | 104.495 | 112.376 | -11.138 | 1.00 |
| 12.78     | 1 . . |     |                             |         |         |         |      |
| ATOM 4986 | OG    | OG  | . SER SER SER B B 220 220 . | 105.722 | 112.787 | -10.501 | 1.00 |
| 15.03     | 1 . . |     |                             |         |         |         |      |
| ATOM 4987 | C     | C   | . SER SER SER B B 220 220 . | 104.154 | 110.763 | -9.255  | 1.00 |
| 11.03     | 1 . . |     |                             |         |         |         |      |
| ATOM 4988 | O     | O   | . SER SER SER B B 220 220 . | 104.043 | 109.585 | -9.563  | 1.00 |
| 9.19      | 1 . . |     |                             |         |         |         |      |
| ATOM 4989 | N     | N   | . GLU GLU GLU B B 221 221 . | 104.803 | 111.166 | -8.164  | 1.00 |
| 10.32     | 1 . . |     |                             |         |         |         |      |
| ATOM 4990 | CA    | CA  | . GLU GLU GLU B B 221 221 . | 105.432 | 110.228 | -7.240  | 1.00 |
| 11.20     | 1 . . |     |                             |         |         |         |      |
| ATOM 4991 | CB    | CB  | . GLU GLU GLU B B 221 221 . | 106.405 | 110.985 | -6.313  | 1.00 |
| 12.88     | 1 . . |     |                             |         |         |         |      |
| ATOM 4992 | CG    | CG  | . GLU GLU GLU B B 221 221 . | 107.106 | 110.188 | -5.187  | 1.00 |
| 17.79     | 1 . . |     |                             |         |         |         |      |
| ATOM 4993 | CD    | CD  | . GLU GLU GLU B B 221 221 . | 107.916 | 108.966 | -5.652  | 1.00 |
| 24.51     | 1 . . |     |                             |         |         |         |      |
| ATOM 4994 | OE1   | OE1 | . GLU GLU GLU B B 221 221 . | 108.053 | 108.739 | -6.886  | 1.00 |
| 29.05     | 1 . . |     |                             |         |         |         |      |
| ATOM 4995 | OE2   | OE2 | . GLU GLU GLU B B 221 221 . | 108.402 | 108.226 | -4.755  | 1.00 |
| 25.49     | 1 . . |     |                             |         |         |         |      |
| ATOM 4996 | C     | C   | . GLU GLU GLU B B 221 221 . | 104.385 | 109.422 | -6.461  | 1.00 |
| 10.55     | 1 . . |     |                             |         |         |         |      |
| ATOM 4997 | O     | O   | . GLU GLU GLU B B 221 221 . | 104.602 | 108.279 | -6.146  | 1.00 |
| 10.17     | 1 . . |     |                             |         |         |         |      |
| ATOM 4998 | N     | N   | . ALA ALA ALA B B 222 222 . | 103.240 | 110.011 | -6.161  | 1.00 |
| 10.23     | 1 . . |     |                             |         |         |         |      |
| ATOM 4999 | CA    | CA  | . ALA ALA ALA B B 222 222 . | 102.186 | 109.194 | -5.544  | 1.00 |
| 9.90      | 1 . . |     |                             |         |         |         |      |
| ATOM 5000 | CB    | CB  | . ALA ALA ALA B B 222 222 . | 100.983 | 110.063 | -5.086  | 1.00 |
| 9.27      | 1 . . |     |                             |         |         |         |      |
| ATOM 5001 | C     | C   | . ALA ALA ALA B B 222 222 . | 101.708 | 108.095 | -6.505  | 1.00 |
| 9.08      | 1 . . |     |                             |         |         |         |      |
| ATOM 5002 | O     | O   | . ALA ALA ALA B B 222 222 . | 101.503 | 106.946 | -6.127  | 1.00 |
| 8.54      | 1 . . |     |                             |         |         |         |      |
| ATOM 5003 | N     | N   | . LEU LEU LEU B B 223 223 . | 101.528 | 108.488 | -7.760  | 1.00 |
| 8.51      | 1 . . |     |                             |         |         |         |      |
| ATOM 5004 | CA    | CA  | . LEU LEU LEU B B 223 223 . | 101.086 | 107.535 | -8.780  | 1.00 |
| 7.40      | 1 . . |     |                             |         |         |         |      |
| ATOM 5005 | CB    | CB  | . LEU LEU LEU B B 223 223 . | 100.850 | 108.291 | -10.081 | 1.00 |
| 5.06      | 1 . . |     |                             |         |         |         |      |
| ATOM 5006 | CG    | CG  | . LEU LEU LEU B B 223 223 . | 99.600  | 109.206 | -9.971  | 1.00 |
| 5.95      | 1 . . |     |                             |         |         |         |      |
| ATOM 5007 | CD1   | CD1 | . LEU LEU LEU B B 223 223 . | 99.599  | 110.073 | -11.134 | 1.00 |
| 9.31      | 1 . . |     |                             |         |         |         |      |
| ATOM 5008 | CD2   | CD2 | . LEU LEU LEU B B 223 223 . | 98.380  | 108.370 | -10.070 | 1.00 |
| 6.81      | 1 . . |     |                             |         |         |         |      |
| ATOM 5009 | C     | C   | . LEU LEU LEU B B 223 223 . | 102.119 | 106.431 | -8.958  | 1.00 |
| 6.82      | 1 . . |     |                             |         |         |         |      |
| ATOM 5010 | O     | O   | . LEU LEU LEU B B 223 223 . | 101.739 | 105.271 | -9.107  | 1.00 |
| 7.33      | 1 . . |     |                             |         |         |         |      |

|           |     |       |                             |         |         |         |      |
|-----------|-----|-------|-----------------------------|---------|---------|---------|------|
| ATOM 5011 | N   | N     | . GLU GLU GLU B B 224 224 . | 103.409 | 106.805 | -8.947  | 1.00 |
| 6.37      | 1   | . . . |                             |         |         |         |      |
| ATOM 5012 | CA  | CA    | . GLU GLU GLU B B 224 224 . | 104.499 | 105.827 | -9.114  | 1.00 |
| 9.25      | 1   | . . . |                             |         |         |         |      |
| ATOM 5013 | CB  | CB    | . GLU GLU GLU B B 224 224 . | 105.850 | 106.538 | -9.189  | 1.00 |
| 8.25      | 1   | . . . |                             |         |         |         |      |
| ATOM 5014 | CG  | CG    | . GLU GLU GLU B B 224 224 . | 106.992 | 105.544 | -9.439  | 1.00 |
| 15.23     | 1   | . . . |                             |         |         |         |      |
| ATOM 5015 | CD  | CD    | . GLU GLU GLU B B 224 224 . | 107.164 | 105.157 | -10.907 | 1.00 |
| 21.34     | 1   | . . . |                             |         |         |         |      |
| ATOM 5016 | OE1 | OE1   | . GLU GLU GLU B B 224 224 . | 108.130 | 104.419 | -11.167 | 1.00 |
| 22.94     | 1   | . . . |                             |         |         |         |      |
| ATOM 5017 | OE2 | OE2   | . GLU GLU GLU B B 224 224 . | 106.367 | 105.583 | -11.779 | 1.00 |
| 24.04     | 1   | . . . |                             |         |         |         |      |
| ATOM 5018 | C   | C     | . GLU GLU GLU B B 224 224 . | 104.550 | 104.830 | -7.971  | 1.00 |
| 8.21      | 1   | . . . |                             |         |         |         |      |
| ATOM 5019 | O   | O     | . GLU GLU GLU B B 224 224 . | 104.799 | 103.644 | -8.209  | 1.00 |
| 10.14     | 1   | . . . |                             |         |         |         |      |
| ATOM 5020 | N   | N     | . LEU LEU LEU B B 225 225 . | 104.293 | 105.309 | -6.763  | 1.00 |
| 6.76      | 1   | . . . |                             |         |         |         |      |
| ATOM 5021 | CA  | CA    | . LEU LEU LEU B B 225 225 . | 104.217 | 104.429 | -5.570  | 1.00 |
| 6.60      | 1   | . . . |                             |         |         |         |      |
| ATOM 5022 | CB  | CB    | . LEU LEU LEU B B 225 225 . | 104.097 | 105.325 | -4.322  | 1.00 |
| 7.60      | 1   | . . . |                             |         |         |         |      |
| ATOM 5023 | CG  | CG    | . LEU LEU LEU B B 225 225 . | 105.359 | 105.957 | -3.771  | 1.00 |
| 8.19      | 1   | . . . |                             |         |         |         |      |
| ATOM 5024 | CD1 | CD1   | . LEU LEU LEU B B 225 225 . | 104.928 | 106.874 | -2.594  | 1.00 |
| 9.55      | 1   | . . . |                             |         |         |         |      |
| ATOM 5025 | CD2 | CD2   | . LEU LEU LEU B B 225 225 . | 106.355 | 104.907 | -3.240  | 1.00 |
| 8.92      | 1   | . . . |                             |         |         |         |      |
| ATOM 5026 | C   | C     | . LEU LEU LEU B B 225 225 . | 103.016 | 103.454 | -5.625  | 1.00 |
| 6.65      | 1   | . . . |                             |         |         |         |      |
| ATOM 5027 | O   | O     | . LEU LEU LEU B B 225 225 . | 103.097 | 102.247 | -5.310  | 1.00 |
| 6.00      | 1   | . . . |                             |         |         |         |      |
| ATOM 5028 | N   | N     | . VAL VAL VAL B B 226 226 . | 101.884 | 103.975 | -6.030  | 1.00 |
| 5.66      | 1   | . . . |                             |         |         |         |      |
| ATOM 5029 | CA  | CA    | . VAL VAL VAL B B 226 226 . | 100.718 | 103.134 | -6.200  | 1.00 |
| 5.36      | 1   | . . . |                             |         |         |         |      |
| ATOM 5030 | CB  | CB    | . VAL VAL VAL B B 226 226 . | 99.423  | 103.952 | -6.430  | 1.00 |
| 6.27      | 1   | . . . |                             |         |         |         |      |
| ATOM 5031 | CG1 | CG1   | . VAL VAL VAL B B 226 226 . | 98.286  | 103.018 | -6.663  | 1.00 |
| 6.13      | 1   | . . . |                             |         |         |         |      |
| ATOM 5032 | CG2 | CG2   | . VAL VAL VAL B B 226 226 . | 99.089  | 104.716 | -5.242  | 1.00 |
| 8.58      | 1   | . . . |                             |         |         |         |      |
| ATOM 5033 | C   | C     | . VAL VAL VAL B B 226 226 . | 100.980 | 102.085 | -7.312  | 1.00 |
| 4.24      | 1   | . . . |                             |         |         |         |      |
| ATOM 5034 | O   | O     | . VAL VAL VAL B B 226 226 . | 100.783 | 100.932 | -7.095  | 1.00 |
| 7.17      | 1   | . . . |                             |         |         |         |      |
| ATOM 5035 | N   | N     | . LYS LYS LYS B B 227 227 . | 101.446 | 102.513 | -8.481  | 1.00 |
| 7.51      | 1   | . . . |                             |         |         |         |      |
| ATOM 5036 | CA  | CA    | . LYS LYS LYS B B 227 227 . | 101.843 | 101.592 | -9.567  | 1.00 |
| 9.05      | 1   | . . . |                             |         |         |         |      |
| ATOM 5037 | CB  | CB    | . LYS LYS LYS B B 227 227 . | 102.383 | 102.437 | -10.745 | 1.00 |
| 10.23     | 1   | . . . |                             |         |         |         |      |

|           |       |     |                             |         |         |         |      |
|-----------|-------|-----|-----------------------------|---------|---------|---------|------|
| ATOM 5038 | CG    | CG  | . LYS LYS LYS B B 227 227 . | 102.696 | 101.573 | -12.001 | 1.00 |
| 14.28     | 1 . . |     |                             |         |         |         |      |
| ATOM 5039 | CD    | CD  | . LYS LYS LYS B B 227 227 . | 103.431 | 102.402 | -13.068 | 1.00 |
| 17.97     | 1 . . |     |                             |         |         |         |      |
| ATOM 5040 | CE    | CE  | . LYS LYS LYS B B 227 227 . | 103.634 | 101.673 | -14.364 | 1.00 |
| 18.23     | 1 . . |     |                             |         |         |         |      |
| ATOM 5041 | NZ    | NZ  | . LYS LYS LYS B B 227 227 . | 103.343 | 102.714 | -15.382 | 1.00 |
| 20.16     | 1 . . |     |                             |         |         |         |      |
| ATOM 5042 | C     | C   | . LYS LYS LYS B B 227 227 . | 102.889 | 100.530 | -9.143  | 1.00 |
| 7.90      | 1 . . |     |                             |         |         |         |      |
| ATOM 5043 | O     | O   | . LYS LYS LYS B B 227 227 . | 102.779 | 99.343  | -9.486  | 1.00 |
| 9.33      | 1 . . |     |                             |         |         |         |      |
| ATOM 5044 | N     | N   | . GLU GLU GLU B B 228 228 . | 103.892 | 100.918 | -8.402  | 1.00 |
| 7.02      | 1 . . |     |                             |         |         |         |      |
| ATOM 5045 | CA    | CA  | . GLU GLU GLU B B 228 228 . | 104.802 | 99.911  | -7.840  | 1.00 |
| 10.61     | 1 . . |     |                             |         |         |         |      |
| ATOM 5046 | CB    | CB  | . GLU GLU GLU B B 228 228 . | 106.025 | 100.498 | -7.182  | 1.00 |
| 10.63     | 1 . . |     |                             |         |         |         |      |
| ATOM 5047 | CG    | CG  | . GLU GLU GLU B B 228 228 . | 106.992 | 99.432  | -6.767  | 1.00 |
| 15.58     | 1 . . |     |                             |         |         |         |      |
| ATOM 5048 | CD    | CD  | . GLU GLU GLU B B 228 228 . | 107.878 | 99.865  | -5.647  | 1.00 |
| 23.40     | 1 . . |     |                             |         |         |         |      |
| ATOM 5049 | OE1   | OE1 | . GLU GLU GLU B B 228 228 . | 108.184 | 99.000  | -4.795  | 1.00 |
| 27.06     | 1 . . |     |                             |         |         |         |      |
| ATOM 5050 | OE2   | OE2 | . GLU GLU GLU B B 228 228 . | 108.282 | 101.054 | -5.611  | 1.00 |
| 25.66     | 1 . . |     |                             |         |         |         |      |
| ATOM 5051 | C     | C   | . GLU GLU GLU B B 228 228 . | 104.173 | 98.913  | -6.920  | 1.00 |
| 9.43      | 1 . . |     |                             |         |         |         |      |
| ATOM 5052 | O     | O   | . GLU GLU GLU B B 228 228 . | 104.436 | 97.715  | -7.032  | 1.00 |
| 9.09      | 1 . . |     |                             |         |         |         |      |
| ATOM 5053 | N     | N   | . ALA ALA ALA B B 229 229 . | 103.372 | 99.392  | -5.975  | 1.00 |
| 8.98      | 1 . . |     |                             |         |         |         |      |
| ATOM 5054 | CA    | CA  | . ALA ALA ALA B B 229 229 . | 102.709 | 98.433  | -5.057  | 1.00 |
| 7.80      | 1 . . |     |                             |         |         |         |      |
| ATOM 5055 | CB    | CB  | . ALA ALA ALA B B 229 229 . | 101.907 | 99.164  | -4.054  | 1.00 |
| 6.71      | 1 . . |     |                             |         |         |         |      |
| ATOM 5056 | C     | C   | . ALA ALA ALA B B 229 229 . | 101.799 | 97.456  | -5.786  | 1.00 |
| 8.18      | 1 . . |     |                             |         |         |         |      |
| ATOM 5057 | O     | O   | . ALA ALA ALA B B 229 229 . | 101.798 | 96.282  | -5.474  | 1.00 |
| 8.21      | 1 . . |     |                             |         |         |         |      |
| ATOM 5058 | N     | N   | . ILE ILE ILE B B 230 230 . | 101.050 | 97.943  | -6.785  | 1.00 |
| 7.71      | 1 . . |     |                             |         |         |         |      |
| ATOM 5059 | CA    | CA  | . ILE ILE ILE B B 230 230 . | 100.180 | 97.090  | -7.546  | 1.00 |
| 7.52      | 1 . . |     |                             |         |         |         |      |
| ATOM 5060 | CB    | CB  | . ILE ILE ILE B B 230 230 . | 99.374  | 97.900  | -8.625  | 1.00 |
| 6.24      | 1 . . |     |                             |         |         |         |      |
| ATOM 5061 | CG1   | CG1 | . ILE ILE ILE B B 230 230 . | 98.250  | 98.761  | -8.003  | 1.00 |
| 5.95      | 1 . . |     |                             |         |         |         |      |
| ATOM 5062 | CD1   | CD1 | . ILE ILE ILE B B 230 230 . | 97.783  | 99.782  | -8.936  | 1.00 |
| 8.49      | 1 . . |     |                             |         |         |         |      |
| ATOM 5063 | CG2   | CG2 | . ILE ILE ILE B B 230 230 . | 98.768  | 96.937  | -9.669  | 1.00 |
| 9.94      | 1 . . |     |                             |         |         |         |      |
| ATOM 5064 | C     | C   | . ILE ILE ILE B B 230 230 . | 100.984 | 95.969  | -8.227  | 1.00 |
| 9.20      | 1 . . |     |                             |         |         |         |      |



|           |       |     |                             |         |        |         |      |
|-----------|-------|-----|-----------------------------|---------|--------|---------|------|
| ATOM 5065 | O     | O   | . ILE ILE ILE B B 230 230 . | 100.537 | 94.809 | -8.236  | 1.00 |
| 8.97      | 1 . . |     |                             |         |        |         |      |
| ATOM 5066 | N     | N   | . ASP ASP ASP B B 231 231 . | 102.164 | 96.337 | -8.759  | 1.00 |
| 8.98      | 1 . . |     |                             |         |        |         |      |
| ATOM 5067 | CA    | CA  | . ASP ASP ASP B B 231 231 . | 103.008 | 95.395 | -9.510  | 1.00 |
| 12.04     | 1 . . |     |                             |         |        |         |      |
| ATOM 5068 | CB    | CB  | . ASP ASP ASP B B 231 231 . | 104.049 | 96.120 | -10.354 | 1.00 |
| 13.23     | 1 . . |     |                             |         |        |         |      |
| ATOM 5069 | CG    | CG  | . ASP ASP ASP B B 231 231 . | 104.830 | 95.162 | -11.237 | 1.00 |
| 19.68     | 1 . . |     |                             |         |        |         |      |
| ATOM 5070 | OD1   | OD1 | . ASP ASP ASP B B 231 231 . | 106.019 | 94.929 | -10.944 | 1.00 |
| 24.63     | 1 . . |     |                             |         |        |         |      |
| ATOM 5071 | OD2   | OD2 | . ASP ASP ASP B B 231 231 . | 104.237 | 94.600 | -12.193 | 1.00 |
| 25.79     | 1 . . |     |                             |         |        |         |      |
| ATOM 5072 | C     | C   | . ASP ASP ASP B B 231 231 . | 103.705 | 94.452 | -8.532  | 1.00 |
| 11.41     | 1 . . |     |                             |         |        |         |      |
| ATOM 5073 | O     | O   | . ASP ASP ASP B B 231 231 . | 103.749 | 93.276 | -8.757  | 1.00 |
| 11.70     | 1 . . |     |                             |         |        |         |      |
| ATOM 5074 | N     | N   | . LYS LYS LYS B B 232 232 . | 104.244 | 94.990 | -7.436  | 1.00 |
| 10.63     | 1 . . |     |                             |         |        |         |      |
| ATOM 5075 | CA    | CA  | . LYS LYS LYS B B 232 232 . | 104.933 | 94.139 | -6.427  | 1.00 |
| 11.54     | 1 . . |     |                             |         |        |         |      |
| ATOM 5076 | CB    | CB  | . LYS LYS LYS B B 232 232 . | 105.606 | 95.006 | -5.372  | 1.00 |
| 12.20     | 1 . . |     |                             |         |        |         |      |
| ATOM 5077 | CG    | CG  | . LYS LYS LYS B B 232 232 . | 106.420 | 94.211 | -4.350  | 1.00 |
| 18.17     | 1 . . |     |                             |         |        |         |      |
| ATOM 5078 | CD    | CD  | . LYS LYS LYS B B 232 232 . | 107.175 | 95.126 | -3.384  | 1.00 |
| 20.45     | 1 . . |     |                             |         |        |         |      |
| ATOM 5079 | CE    | CE  | . LYS LYS LYS B B 232 232 . | 107.669 | 94.350 | -2.165  | 1.00 |
| 21.83     | 1 . . |     |                             |         |        |         |      |
| ATOM 5080 | NZ    | NZ  | . LYS LYS LYS B B 232 232 . | 108.836 | 93.460 | -2.477  | 1.00 |
| 23.41     | 1 . . |     |                             |         |        |         |      |
| ATOM 5081 | C     | C   | . LYS LYS LYS B B 232 232 . | 103.939 | 93.131 | -5.801  | 1.00 |
| 9.35      | 1 . . |     |                             |         |        |         |      |
| ATOM 5082 | O     | O   | . LYS LYS LYS B B 232 232 . | 104.288 | 91.977 | -5.503  | 1.00 |
| 10.80     | 1 . . |     |                             |         |        |         |      |
| ATOM 5083 | N     | N   | . ALA ALA ALA B B 233 233 . | 102.684 | 93.525 | -5.643  | 1.00 |
| 7.95      | 1 . . |     |                             |         |        |         |      |
| ATOM 5084 | CA    | CA  | . ALA ALA ALA B B 233 233 . | 101.642 | 92.606 | -5.219  | 1.00 |
| 8.33      | 1 . . |     |                             |         |        |         |      |
| ATOM 5085 | CB    | CB  | . ALA ALA ALA B B 233 233 . | 100.394 | 93.407 | -4.731  | 1.00 |
| 9.08      | 1 . . |     |                             |         |        |         |      |
| ATOM 5086 | C     | C   | . ALA ALA ALA B B 233 233 . | 101.242 | 91.577 | -6.303  | 1.00 |
| 7.93      | 1 . . |     |                             |         |        |         |      |
| ATOM 5087 | O     | O   | . ALA ALA ALA B B 233 233 . | 100.526 | 90.673 | -6.033  | 1.00 |
| 9.59      | 1 . . |     |                             |         |        |         |      |
| ATOM 5088 | N     | N   | . GLY GLY GLY B B 234 234 . | 101.707 | 91.760 | -7.534  | 1.00 |
| 7.83      | 1 . . |     |                             |         |        |         |      |
| ATOM 5089 | CA    | CA  | . GLY GLY GLY B B 234 234 . | 101.364 | 90.898 | -8.649  | 1.00 |
| 7.69      | 1 . . |     |                             |         |        |         |      |
| ATOM 5090 | C     | C   | . GLY GLY GLY B B 234 234 . | 100.021 | 91.079 | -9.348  | 1.00 |
| 8.63      | 1 . . |     |                             |         |        |         |      |
| ATOM 5091 | O     | O   | . GLY GLY GLY B B 234 234 . | 99.582  | 90.164 | -10.075 | 1.00 |
| 9.73      | 1 . . |     |                             |         |        |         |      |

|           |       |     |                             |         |        |         |      |
|-----------|-------|-----|-----------------------------|---------|--------|---------|------|
| ATOM 5092 | N     | N   | . TYR TYR TYR B B 235 235 . | 99.419  | 92.270 | -9.237  | 1.00 |
| 6.72      | 1 . . |     |                             |         |        |         |      |
| ATOM 5093 | CA    | CA  | . TYR TYR TYR B B 235 235 . | 98.076  | 92.534 | -9.759  | 1.00 |
| 4.54      | 1 . . |     |                             |         |        |         |      |
| ATOM 5094 | CB    | CB  | . TYR TYR TYR B B 235 235 . | 97.140  | 92.952 | -8.633  | 1.00 |
| 3.53      | 1 . . |     |                             |         |        |         |      |
| ATOM 5095 | CG    | CG  | . TYR TYR TYR B B 235 235 . | 96.862  | 91.832 | -7.670  | 1.00 |
| 5.42      | 1 . . |     |                             |         |        |         |      |
| ATOM 5096 | CD1   | CD1 | . TYR TYR TYR B B 235 235 . | 97.247  | 91.928 | -6.339  | 1.00 |
| 5.02      | 1 . . |     |                             |         |        |         |      |
| ATOM 5097 | CE1   | CE1 | . TYR TYR TYR B B 235 235 . | 97.001  | 90.874 | -5.456  | 1.00 |
| 6.65      | 1 . . |     |                             |         |        |         |      |
| ATOM 5098 | CZ    | CZ  | . TYR TYR TYR B B 235 235 . | 96.415  | 89.729 | -5.898  | 1.00 |
| 6.56      | 1 . . |     |                             |         |        |         |      |
| ATOM 5099 | OH    | OH  | . TYR TYR TYR B B 235 235 . | 96.210  | 88.790 | -4.921  | 1.00 |
| 8.70      | 1 . . |     |                             |         |        |         |      |
| ATOM 5100 | CE2   | CE2 | . TYR TYR TYR B B 235 235 . | 96.031  | 89.574 | -7.235  | 1.00 |
| 8.79      | 1 . . |     |                             |         |        |         |      |
| ATOM 5101 | CD2   | CD2 | . TYR TYR TYR B B 235 235 . | 96.238  | 90.650 | -8.119  | 1.00 |
| 7.23      | 1 . . |     |                             |         |        |         |      |
| ATOM 5102 | C     | C   | . TYR TYR TYR B B 235 235 . | 98.010  | 93.609 | -10.852 | 1.00 |
| 5.25      | 1 . . |     |                             |         |        |         |      |
| ATOM 5103 | O     | O   | . TYR TYR TYR B B 235 235 . | 96.973  | 94.243 | -11.089 | 1.00 |
| 6.01      | 1 . . |     |                             |         |        |         |      |
| ATOM 5104 | N     | N   | . THR THR THR B B 236 236 . | 99.130  | 93.803 | -11.533 | 1.00 |
| 6.13      | 1 . . |     |                             |         |        |         |      |
| ATOM 5105 | CA    | CA  | . THR THR THR B B 236 236 . | 99.170  | 94.733 | -12.673 | 1.00 |
| 8.92      | 1 . . |     |                             |         |        |         |      |
| ATOM 5106 | CB    | CB  | . THR THR THR B B 236 236 . | 100.544 | 94.640 | -13.352 | 1.00 |
| 10.66     | 1 . . |     |                             |         |        |         |      |
| ATOM 5107 | OG1   | OG1 | . THR THR THR B B 236 236 . | 101.533 | 94.987 | -12.398 | 1.00 |
| 13.05     | 1 . . |     |                             |         |        |         |      |
| ATOM 5108 | CG2   | CG2 | . THR THR THR B B 236 236 . | 100.725 | 95.649 | -14.535 | 1.00 |
| 9.89      | 1 . . |     |                             |         |        |         |      |
| ATOM 5109 | C     | C   | . THR THR THR B B 236 236 . | 97.998  | 94.512 | -13.657 | 1.00 |
| 9.68      | 1 . . |     |                             |         |        |         |      |
| ATOM 5110 | O     | O   | . THR THR THR B B 236 236 . | 97.398  | 95.464 | -14.126 | 1.00 |
| 10.22     | 1 . . |     |                             |         |        |         |      |
| ATOM 5111 | N     | N   | . GLU GLU GLU B B 237 237 . | 97.643  | 93.299 | -14.003 | 1.00 |
| 12.27     | 1 . . |     |                             |         |        |         |      |
| ATOM 5112 | CA    | CA  | . GLU GLU GLU B B 237 237 . | 96.495  | 93.155 | -14.928 | 1.00 |
| 15.05     | 1 . . |     |                             |         |        |         |      |
| ATOM 5113 | CB    | CB  | . GLU GLU GLU B B 237 237 . | 96.457  | 91.763 | -15.592 | 1.00 |
| 17.08     | 1 . . |     |                             |         |        |         |      |
| ATOM 5114 | CG    | CG  | . GLU GLU GLU B B 237 237 . | 97.205  | 91.677 | -16.912 | 1.00 |
| 24.29     | 1 . . |     |                             |         |        |         |      |
| ATOM 5115 | CD    | CD  | . GLU GLU GLU B B 237 237 . | 98.660  | 92.017 | -16.758 | 1.00 |
| 30.83     | 1 . . |     |                             |         |        |         |      |
| ATOM 5116 | OE1   | OE1 | . GLU GLU GLU B B 237 237 . | 99.308  | 91.440 | -15.843 | 1.00 |
| 35.39     | 1 . . |     |                             |         |        |         |      |
| ATOM 5117 | OE2   | OE2 | . GLU GLU GLU B B 237 237 . | 99.151  | 92.863 | -17.543 | 1.00 |
| 33.69     | 1 . . |     |                             |         |        |         |      |
| ATOM 5118 | C     | C   | . GLU GLU GLU B B 237 237 . | 95.130  | 93.414 | -14.333 | 1.00 |
| 13.75     | 1 . . |     |                             |         |        |         |      |

|           |         |     |                             |        |         |         |      |
|-----------|---------|-----|-----------------------------|--------|---------|---------|------|
| ATOM 5119 | O       | O   | . GLU GLU GLU B B 237 237 . | 94.114 | 93.414  | -15.060 | 1.00 |
| 15.95     | 1 . . . |     |                             |        |         |         |      |
| ATOM 5120 | N       | N   | . LYS LYS LYS B B 238 238 . | 95.059 | 93.617  | -13.024 | 1.00 |
| 10.88     | 1 . . . |     |                             |        |         |         |      |
| ATOM 5121 | CA      | CA  | . LYS LYS LYS B B 238 238 . | 93.764 | 93.516  | -12.389 | 1.00 |
| 9.87      | 1 . . . |     |                             |        |         |         |      |
| ATOM 5122 | CB      | CB  | . LYS LYS LYS B B 238 238 . | 93.736 | 92.294  | -11.449 | 1.00 |
| 9.69      | 1 . . . |     |                             |        |         |         |      |
| ATOM 5123 | CG      | CG  | . LYS LYS LYS B B 238 238 . | 93.613 | 90.926  | -12.199 | 1.00 |
| 14.20     | 1 . . . |     |                             |        |         |         |      |
| ATOM 5124 | CD      | CD  | . LYS LYS LYS B B 238 238 . | 93.436 | 89.736  | -11.211 | 1.00 |
| 17.55     | 1 . . . |     |                             |        |         |         |      |
| ATOM 5125 | CE      | CE  | . LYS LYS LYS B B 238 238 . | 93.319 | 88.404  | -11.957 | 1.00 |
| 22.85     | 1 . . . |     |                             |        |         |         |      |
| ATOM 5126 | NZ      | NZ  | . LYS LYS LYS B B 238 238 . | 92.238 | 87.522  | -11.448 | 1.00 |
| 24.86     | 1 . . . |     |                             |        |         |         |      |
| ATOM 5127 | C       | C   | . LYS LYS LYS B B 238 238 . | 93.338 | 94.785  | -11.650 | 1.00 |
| 7.13      | 1 . . . |     |                             |        |         |         |      |
| ATOM 5128 | O       | O   | . LYS LYS LYS B B 238 238 . | 92.181 | 94.875  | -11.243 | 1.00 |
| 6.32      | 1 . . . |     |                             |        |         |         |      |
| ATOM 5129 | N       | N   | . ILE ILE ILE B B 239 239 . | 94.265 | 95.694  | -11.383 | 1.00 |
| 5.50      | 1 . . . |     |                             |        |         |         |      |
| ATOM 5130 | CA      | CA  | . ILE ILE ILE B B 239 239 . | 93.986 | 96.920  | -10.574 | 1.00 |
| 4.48      | 1 . . . |     |                             |        |         |         |      |
| ATOM 5131 | CB      | CB  | . ILE ILE ILE B B 239 239 . | 94.741 | 96.859  | -9.253  | 1.00 |
| 5.61      | 1 . . . |     |                             |        |         |         |      |
| ATOM 5132 | CG1     | CG1 | . ILE ILE ILE B B 239 239 . | 94.266 | 95.609  | -8.456  | 1.00 |
| 6.08      | 1 . . . |     |                             |        |         |         |      |
| ATOM 5133 | CD1     | CD1 | . ILE ILE ILE B B 239 239 . | 95.098 | 95.321  | -7.141  | 1.00 |
| 3.60      | 1 . . . |     |                             |        |         |         |      |
| ATOM 5134 | CG2     | CG2 | . ILE ILE ILE B B 239 239 . | 94.398 | 98.021  | -8.372  | 1.00 |
| 6.81      | 1 . . . |     |                             |        |         |         |      |
| ATOM 5135 | C       | C   | . ILE ILE ILE B B 239 239 . | 94.378 | 98.191  | -11.310 | 1.00 |
| 4.51      | 1 . . . |     |                             |        |         |         |      |
| ATOM 5136 | O       | O   | . ILE ILE ILE B B 239 239 . | 95.482 | 98.278  | -11.839 | 1.00 |
| 5.71      | 1 . . . |     |                             |        |         |         |      |
| ATOM 5137 | N       | N   | . VAL VAL VAL B B 240 240 . | 93.504 | 99.178  | -11.290 | 1.00 |
| 3.93      | 1 . . . |     |                             |        |         |         |      |
| ATOM 5138 | CA      | CA  | . VAL VAL VAL B B 240 240 . | 93.765 | 100.456 | -12.017 | 1.00 |
| 3.26      | 1 . . . |     |                             |        |         |         |      |
| ATOM 5139 | CB      | CB  | . VAL VAL VAL B B 240 240 . | 92.762 | 100.666 | -13.162 | 1.00 |
| 3.00      | 1 . . . |     |                             |        |         |         |      |
| ATOM 5140 | CG1     | CG1 | . VAL VAL VAL B B 240 240 . | 92.962 | 99.577  | -14.266 | 1.00 |
| 5.02      | 1 . . . |     |                             |        |         |         |      |
| ATOM 5141 | CG2     | CG2 | . VAL VAL VAL B B 240 240 . | 91.356 | 100.750 | -12.639 | 1.00 |
| 4.20      | 1 . . . |     |                             |        |         |         |      |
| ATOM 5142 | C       | C   | . VAL VAL VAL B B 240 240 . | 93.627 | 101.583 | -10.962 | 1.00 |
| 2.83      | 1 . . . |     |                             |        |         |         |      |
| ATOM 5143 | O       | O   | . VAL VAL VAL B B 240 240 . | 93.316 | 101.323 | -9.767  | 1.00 |
| 3.22      | 1 . . . |     |                             |        |         |         |      |
| ATOM 5144 | N       | N   | . ILE ILE ILE B B 241 241 . | 93.885 | 102.809 | -11.380 | 1.00 |
| 2.86      | 1 . . . |     |                             |        |         |         |      |
| ATOM 5145 | CA      | CA  | . ILE ILE ILE B B 241 241 . | 93.959 | 103.945 | -10.470 | 1.00 |
| 3.25      | 1 . . . |     |                             |        |         |         |      |



|           |       |     |                   |         |          |         |        |      |
|-----------|-------|-----|-------------------|---------|----------|---------|--------|------|
| ATOM 5173 | CA    | CA  | . VAL VAL VAL B B | 245 245 | . 92.209 | 116.088 | -7.126 | 1.00 |
| 2.41      | 1 . . |     |                   |         |          |         |        |      |
| ATOM 5174 | CB    | CB  | . VAL VAL VAL B B | 245 245 | . 92.244 | 116.711 | -8.493 | 1.00 |
| 3.06      | 1 . . |     |                   |         |          |         |        |      |
| ATOM 5175 | CG1   | CG1 | . VAL VAL VAL B B | 245 245 | . 93.065 | 117.993 | -8.502 | 1.00 |
| 2.95      | 1 . . |     |                   |         |          |         |        |      |
| ATOM 5176 | CG2   | CG2 | . VAL VAL VAL B B | 245 245 | . 92.923 | 115.694 | -9.483 | 1.00 |
| 2.05      | 1 . . |     |                   |         |          |         |        |      |
| ATOM 5177 | C     | C   | . VAL VAL VAL B B | 245 245 | . 91.727 | 117.052 | -6.052 | 1.00 |
| 2.55      | 1 . . |     |                   |         |          |         |        |      |
| ATOM 5178 | O     | O   | . VAL VAL VAL B B | 245 245 | . 92.509 | 117.648 | -5.333 | 1.00 |
| 4.86      | 1 . . |     |                   |         |          |         |        |      |
| ATOM 5179 | N     | N   | . ALA ALA ALA B B | 246 246 | . 90.402 | 117.161 | -5.922 | 1.00 |
| 3.34      | 1 . . |     |                   |         |          |         |        |      |
| ATOM 5180 | CA    | CA  | . ALA ALA ALA B B | 246 246 | . 89.778 | 118.229 | -5.062 | 1.00 |
| 3.13      | 1 . . |     |                   |         |          |         |        |      |
| ATOM 5181 | CB    | CB  | . ALA ALA ALA B B | 246 246 | . 89.956 | 117.888 | -3.590 | 1.00 |
| 3.29      | 1 . . |     |                   |         |          |         |        |      |
| ATOM 5182 | C     | C   | . ALA ALA ALA B B | 246 246 | . 90.395 | 119.587 | -5.402 | 1.00 |
| 2.99      | 1 . . |     |                   |         |          |         |        |      |
| ATOM 5183 | O     | O   | . ALA ALA ALA B B | 246 246 | . 90.802 | 120.389 | -4.548 | 1.00 |
| 3.39      | 1 . . |     |                   |         |          |         |        |      |
| ATOM 5184 | N     | N   | . ALA ALA ALA B B | 247 247 | . 90.341 | 119.924 | -6.669 | 1.00 |
| 2.58      | 1 . . |     |                   |         |          |         |        |      |
| ATOM 5185 | CA    | CA  | . ALA ALA ALA B B | 247 247 | . 90.914 | 121.145 | -7.147 | 1.00 |
| 4.08      | 1 . . |     |                   |         |          |         |        |      |
| ATOM 5186 | CB    | CB  | . ALA ALA ALA B B | 247 247 | . 90.761 | 121.178 | -8.621 | 1.00 |
| 3.10      | 1 . . |     |                   |         |          |         |        |      |
| ATOM 5187 | C     | C   | . ALA ALA ALA B B | 247 247 | . 90.304 | 122.464 | -6.520 | 1.00 |
| 3.93      | 1 . . |     |                   |         |          |         |        |      |
| ATOM 5188 | O     | O   | . ALA ALA ALA B B | 247 247 | . 90.967 | 123.494 | -6.459 | 1.00 |
| 5.52      | 1 . . |     |                   |         |          |         |        |      |
| ATOM 5189 | N     | N   | . SER SER SER B B | 248 248 | . 89.068 | 122.413 | -6.017 | 1.00 |
| 5.87      | 1 . . |     |                   |         |          |         |        |      |
| ATOM 5190 | CA    | CA  | . SER SER SER B B | 248 248 | . 88.566 | 123.662 | -5.406 | 1.00 |
| 6.11      | 1 . . |     |                   |         |          |         |        |      |
| ATOM 5191 | CB    | CB  | . SER SER SER B B | 248 248 | . 87.156 | 123.483 | -4.969 | 1.00 |
| 5.73      | 1 . . |     |                   |         |          |         |        |      |
| ATOM 5192 | OG    | OG  | . SER SER SER B B | 248 248 | . 86.390 | 123.204 | -6.076 | 1.00 |
| 4.65      | 1 . . |     |                   |         |          |         |        |      |
| ATOM 5193 | C     | C   | . SER SER SER B B | 248 248 | . 89.400 | 124.044 | -4.180 | 1.00 |
| 7.89      | 1 . . |     |                   |         |          |         |        |      |
| ATOM 5194 | O     | O   | . SER SER SER B B | 248 248 | . 89.340 | 125.181 | -3.732 | 1.00 |
| 7.60      | 1 . . |     |                   |         |          |         |        |      |
| ATOM 5195 | N     | N   | . GLU GLU GLU B B | 249 249 | . 90.160 | 123.118 | -3.622 | 1.00 |
| 8.51      | 1 . . |     |                   |         |          |         |        |      |
| ATOM 5196 | CA    | CA  | . GLU GLU GLU B B | 249 249 | . 90.917 | 123.326 | -2.395 | 1.00 |
| 8.32      | 1 . . |     |                   |         |          |         |        |      |
| ATOM 5197 | CB    | CB  | . GLU GLU GLU B B | 249 249 | . 91.259 | 121.984 | -1.718 | 1.00 |
| 8.64      | 1 . . |     |                   |         |          |         |        |      |
| ATOM 5198 | CG    | CG  | . GLU GLU GLU B B | 249 249 | . 90.001 | 121.299 | -1.250 | 1.00 |
| 9.14      | 1 . . |     |                   |         |          |         |        |      |
| ATOM 5199 | CD    | CD  | . GLU GLU GLU B B | 249 249 | . 89.368 | 122.043 | -0.067 | 1.00 |
| 8.69      | 1 . . |     |                   |         |          |         |        |      |

|           |       |     |                   |         |          |         |         |      |
|-----------|-------|-----|-------------------|---------|----------|---------|---------|------|
| ATOM 5200 | OE1   | OE1 | . GLU GLU GLU B B | 249 249 | . 90.155 | 122.638 | 0.738   | 1.00 |
| 15.34     | 1 . . |     |                   |         |          |         |         |      |
| ATOM 5201 | OE2   | OE2 | . GLU GLU GLU B B | 249 249 | . 88.126 | 122.068 | 0.050   | 1.00 |
| 7.94      | 1 . . |     |                   |         |          |         |         |      |
| ATOM 5202 | C     | C   | . GLU GLU GLU B B | 249 249 | . 92.181 | 124.116 | -2.632  | 1.00 |
| 8.09      | 1 . . |     |                   |         |          |         |         |      |
| ATOM 5203 | O     | O   | . GLU GLU GLU B B | 249 249 | . 92.724 | 124.733 | -1.685  | 1.00 |
| 10.32     | 1 . . |     |                   |         |          |         |         |      |
| ATOM 5204 | N     | N   | . PHE PHE PHE B B | 250 250 | . 92.654 | 124.141 | -3.870  | 1.00 |
| 8.12      | 1 . . |     |                   |         |          |         |         |      |
| ATOM 5205 | CA    | CA  | . PHE PHE PHE B B | 250 250 | . 93.890 | 124.840 | -4.222  | 1.00 |
| 7.98      | 1 . . |     |                   |         |          |         |         |      |
| ATOM 5206 | CB    | CB  | . PHE PHE PHE B B | 250 250 | . 95.100 | 123.886 | -4.486  | 1.00 |
| 8.80      | 1 . . |     |                   |         |          |         |         |      |
| ATOM 5207 | CG    | CG  | . PHE PHE PHE B B | 250 250 | . 94.850 | 122.836 | -5.545  | 1.00 |
| 10.08     | 1 . . |     |                   |         |          |         |         |      |
| ATOM 5208 | CD1   | CD1 | . PHE PHE PHE B B | 250 250 | . 94.611 | 121.516 | -5.178  | 1.00 |
| 11.50     | 1 . . |     |                   |         |          |         |         |      |
| ATOM 5209 | CE1   | CE1 | . PHE PHE PHE B B | 250 250 | . 94.380 | 120.554 | -6.118  | 1.00 |
| 11.26     | 1 . . |     |                   |         |          |         |         |      |
| ATOM 5210 | CZ    | CZ  | . PHE PHE PHE B B | 250 250 | . 94.427 | 120.889 | -7.467  | 1.00 |
| 13.09     | 1 . . |     |                   |         |          |         |         |      |
| ATOM 5211 | CE2   | CE2 | . PHE PHE PHE B B | 250 250 | . 94.604 | 122.209 | -7.855  | 1.00 |
| 10.92     | 1 . . |     |                   |         |          |         |         |      |
| ATOM 5212 | CD2   | CD2 | . PHE PHE PHE B B | 250 250 | . 94.886 | 123.163 | -6.889  | 1.00 |
| 9.77      | 1 . . |     |                   |         |          |         |         |      |
| ATOM 5213 | C     | C   | . PHE PHE PHE B B | 250 250 | . 93.677 | 125.848 | -5.376  | 1.00 |
| 8.11      | 1 . . |     |                   |         |          |         |         |      |
| ATOM 5214 | O     | O   | . PHE PHE PHE B B | 250 250 | . 94.627 | 126.332 | -5.973  | 1.00 |
| 9.00      | 1 . . |     |                   |         |          |         |         |      |
| ATOM 5215 | N     | N   | . TYR TYR TYR B B | 251 251 | . 92.420 | 126.201 | -5.666  | 1.00 |
| 7.54      | 1 . . |     |                   |         |          |         |         |      |
| ATOM 5216 | CA    | CA  | . TYR TYR TYR B B | 251 251 | . 92.098 | 127.297 | -6.551  | 1.00 |
| 8.27      | 1 . . |     |                   |         |          |         |         |      |
| ATOM 5217 | CB    | CB  | . TYR TYR TYR B B | 251 251 | . 90.628 | 127.244 | -6.897  | 1.00 |
| 7.62      | 1 . . |     |                   |         |          |         |         |      |
| ATOM 5218 | CG    | CG  | . TYR TYR TYR B B | 251 251 | . 90.195 | 128.394 | -7.805  | 1.00 |
| 8.95      | 1 . . |     |                   |         |          |         |         |      |
| ATOM 5219 | CD1   | CD1 | . TYR TYR TYR B B | 251 251 | . 90.454 | 128.380 | -9.196  | 1.00 |
| 9.22      | 1 . . |     |                   |         |          |         |         |      |
| ATOM 5220 | CE1   | CE1 | . TYR TYR TYR B B | 251 251 | . 90.031 | 129.439 | -10.020 | 1.00 |
| 11.28     | 1 . . |     |                   |         |          |         |         |      |
| ATOM 5221 | CZ    | CZ  | . TYR TYR TYR B B | 251 251 | . 89.419 | 130.527 | -9.415  | 1.00 |
| 12.08     | 1 . . |     |                   |         |          |         |         |      |
| ATOM 5222 | OH    | OH  | . TYR TYR TYR B B | 251 251 | . 88.989 | 131.589 | -10.167 | 1.00 |
| 14.67     | 1 . . |     |                   |         |          |         |         |      |
| ATOM 5223 | CE2   | CE2 | . TYR TYR TYR B B | 251 251 | . 89.187 | 130.545 | -8.033  | 1.00 |
| 11.68     | 1 . . |     |                   |         |          |         |         |      |
| ATOM 5224 | CD2   | CD2 | . TYR TYR TYR B B | 251 251 | . 89.580 | 129.530 | -7.251  | 1.00 |
| 10.76     | 1 . . |     |                   |         |          |         |         |      |
| ATOM 5225 | C     | C   | . TYR TYR TYR B B | 251 251 | . 92.494 | 128.639 | -5.909  | 1.00 |
| 8.17      | 1 . . |     |                   |         |          |         |         |      |
| ATOM 5226 | O     | O   | . TYR TYR TYR B B | 251 251 | . 92.013 | 128.949 | -4.809  | 1.00 |
| 8.46      | 1 . . |     |                   |         |          |         |         |      |

|           |       |     |                             |        |         |         |      |
|-----------|-------|-----|-----------------------------|--------|---------|---------|------|
| ATOM 5227 | N     | N   | . ARG ARG ARG B B 252 252 . | 93.320 | 129.394 | -6.622  | 1.00 |
| 8.63      | 1 . . |     |                             |        |         |         |      |
| ATOM 5228 | CA    | CA  | . ARG ARG ARG B B 252 252 . | 93.832 | 130.690 | -6.162  | 1.00 |
| 11.02     | 1 . . |     |                             |        |         |         |      |
| ATOM 5229 | CB    | CB  | . ARG ARG ARG B B 252 252 . | 95.320 | 130.588 | -5.808  | 1.00 |
| 10.98     | 1 . . |     |                             |        |         |         |      |
| ATOM 5230 | CG    | CG  | . ARG ARG ARG B B 252 252 . | 95.704 | 129.581 | -4.731  | 1.00 |
| 12.76     | 1 . . |     |                             |        |         |         |      |
| ATOM 5231 | CD    | CD  | . ARG ARG ARG B B 252 252 . | 95.075 | 129.944 | -3.385  | 1.00 |
| 15.65     | 1 . . |     |                             |        |         |         |      |
| ATOM 5232 | NE    | NE  | . ARG ARG ARG B B 252 252 . | 95.389 | 128.991 | -2.320  | 1.00 |
| 16.77     | 1 . . |     |                             |        |         |         |      |
| ATOM 5233 | CZ    | CZ  | . ARG ARG ARG B B 252 252 . | 94.519 | 128.136 | -1.766  | 1.00 |
| 18.08     | 1 . . |     |                             |        |         |         |      |
| ATOM 5234 | NH1   | NH1 | . ARG ARG ARG B B 252 252 . | 93.254 | 128.062 | -2.167  | 1.00 |
| 19.32     | 1 . . |     |                             |        |         |         |      |
| ATOM 5235 | NH2   | NH2 | . ARG ARG ARG B B 252 252 . | 94.927 | 127.305 | -0.826  | 1.00 |
| 20.82     | 1 . . |     |                             |        |         |         |      |
| ATOM 5236 | C     | C   | . ARG ARG ARG B B 252 252 . | 93.709 | 131.719 | -7.254  | 1.00 |
| 10.64     | 1 . . |     |                             |        |         |         |      |
| ATOM 5237 | O     | O   | . ARG ARG ARG B B 252 252 . | 94.438 | 131.643 | -8.225  | 1.00 |
| 11.61     | 1 . . |     |                             |        |         |         |      |
| ATOM 5238 | N     | N   | . ASP ASP ASP B B 253 253 . | 92.772 | 132.668 | -7.112  | 1.00 |
| 12.48     | 1 . . |     |                             |        |         |         |      |
| ATOM 5239 | CA    | CA  | . ASP ASP ASP B B 253 253 . | 92.757 | 133.838 | -8.011  | 1.00 |
| 12.49     | 1 . . |     |                             |        |         |         |      |
| ATOM 5240 | CB    | CB  | . ASP ASP ASP B B 253 253 . | 94.044 | 134.673 | -7.813  | 1.00 |
| 14.68     | 1 . . |     |                             |        |         |         |      |
| ATOM 5241 | CG    | CG  | . ASP ASP ASP B B 253 253 . | 94.133 | 135.289 | -6.465  | 1.00 |
| 17.58     | 1 . . |     |                             |        |         |         |      |
| ATOM 5242 | OD1   | OD1 | . ASP ASP ASP B B 253 253 . | 95.284 | 135.543 | -6.027  | 1.00 |
| 22.05     | 1 . . |     |                             |        |         |         |      |
| ATOM 5243 | OD2   | OD2 | . ASP ASP ASP B B 253 253 . | 93.073 | 135.547 | -5.835  | 1.00 |
| 18.75     | 1 . . |     |                             |        |         |         |      |
| ATOM 5244 | C     | C   | . ASP ASP ASP B B 253 253 . | 92.641 | 133.539 | -9.493  | 1.00 |
| 11.47     | 1 . . |     |                             |        |         |         |      |
| ATOM 5245 | O     | O   | . ASP ASP ASP B B 253 253 . | 93.279 | 134.203 | -10.308 | 1.00 |
| 11.71     | 1 . . |     |                             |        |         |         |      |
| ATOM 5246 | N     | N   | . GLY GLY GLY B B 254 254 . | 91.850 | 132.521 | -9.870  | 1.00 |
| 10.05     | 1 . . |     |                             |        |         |         |      |
| ATOM 5247 | CA    | CA  | . GLY GLY GLY B B 254 254 . | 91.749 | 132.153 | -11.250 | 1.00 |
| 8.86      | 1 . . |     |                             |        |         |         |      |
| ATOM 5248 | C     | C   | . GLY GLY GLY B B 254 254 . | 92.762 | 131.137 | -11.713 | 1.00 |
| 9.47      | 1 . . |     |                             |        |         |         |      |
| ATOM 5249 | O     | O   | . GLY GLY GLY B B 254 254 . | 92.707 | 130.728 | -12.861 | 1.00 |
| 9.27      | 1 . . |     |                             |        |         |         |      |
| ATOM 5250 | N     | N   | . LYS LYS LYS B B 255 255 . | 93.701 | 130.784 | -10.848 | 1.00 |
| 10.36     | 1 . . |     |                             |        |         |         |      |
| ATOM 5251 | CA    | CA  | . LYS LYS LYS B B 255 255 . | 94.690 | 129.773 | -11.217 | 1.00 |
| 10.26     | 1 . . |     |                             |        |         |         |      |
| ATOM 5252 | CB    | CB  | . LYS LYS LYS B B 255 255 . | 96.091 | 130.384 | -11.318 | 1.00 |
| 11.09     | 1 . . |     |                             |        |         |         |      |
| ATOM 5253 | CG    | CG  | . LYS LYS LYS B B 255 255 . | 96.254 | 131.402 | -12.401 | 1.00 |
| 15.35     | 1 . . |     |                             |        |         |         |      |

|           |       |     |                   |         |           |         |         |      |
|-----------|-------|-----|-------------------|---------|-----------|---------|---------|------|
| ATOM 5254 | CD    | CD  | . LYS LYS LYS B B | 255 255 | . 97.556  | 132.092 | -12.318 | 1.00 |
| 17.49     | 1 . . |     |                   |         |           |         |         |      |
| ATOM 5255 | CE    | CE  | . LYS LYS LYS B B | 255 255 | . 97.715  | 132.827 | -13.577 | 1.00 |
| 17.45     | 1 . . |     |                   |         |           |         |         |      |
| ATOM 5256 | NZ    | NZ  | . LYS LYS LYS B B | 255 255 | . 99.059  | 133.391 | -13.714 | 1.00 |
| 19.18     | 1 . . |     |                   |         |           |         |         |      |
| ATOM 5257 | C     | C   | . LYS LYS LYS B B | 255 255 | . 94.708  | 128.687 | -10.174 | 1.00 |
| 7.72      | 1 . . |     |                   |         |           |         |         |      |
| ATOM 5258 | O     | O   | . LYS LYS LYS B B | 255 255 | . 93.818  | 128.597 | -9.330  | 1.00 |
| 7.88      | 1 . . |     |                   |         |           |         |         |      |
| ATOM 5259 | N     | N   | . TYR TYR TYR B B | 256 256 | . 95.763  | 127.881 | -10.170 | 1.00 |
| 9.92      | 1 . . |     |                   |         |           |         |         |      |
| ATOM 5260 | CA    | CA  | . TYR TYR TYR B B | 256 256 | . 95.805  | 126.667 | -9.326  | 1.00 |
| 9.69      | 1 . . |     |                   |         |           |         |         |      |
| ATOM 5261 | CB    | CB  | . TYR TYR TYR B B | 256 256 | . 95.446  | 125.399 | -10.173 | 1.00 |
| 7.74      | 1 . . |     |                   |         |           |         |         |      |
| ATOM 5262 | CG    | CG  | . TYR TYR TYR B B | 256 256 | . 93.969  | 125.371 | -10.582 | 1.00 |
| 7.52      | 1 . . |     |                   |         |           |         |         |      |
| ATOM 5263 | CD1   | CD1 | . TYR TYR TYR B B | 256 256 | . 92.991  | 124.840 | -9.740  | 1.00 |
| 5.54      | 1 . . |     |                   |         |           |         |         |      |
| ATOM 5264 | CE1   | CE1 | . TYR TYR TYR B B | 256 256 | . 91.627  | 124.876 | -10.121 | 1.00 |
| 3.99      | 1 . . |     |                   |         |           |         |         |      |
| ATOM 5265 | CZ    | CZ  | . TYR TYR TYR B B | 256 256 | . 91.254  | 125.421 | -11.329 | 1.00 |
| 3.25      | 1 . . |     |                   |         |           |         |         |      |
| ATOM 5266 | OH    | OH  | . TYR TYR TYR B B | 256 256 | . 89.933  | 125.353 | -11.700 | 1.00 |
| 3.33      | 1 . . |     |                   |         |           |         |         |      |
| ATOM 5267 | CE2   | CE2 | . TYR TYR TYR B B | 256 256 | . 92.243  | 125.892 | -12.217 | 1.00 |
| 3.59      | 1 . . |     |                   |         |           |         |         |      |
| ATOM 5268 | CD2   | CD2 | . TYR TYR TYR B B | 256 256 | . 93.549  | 125.912 | -11.824 | 1.00 |
| 6.31      | 1 . . |     |                   |         |           |         |         |      |
| ATOM 5269 | C     | C   | . TYR TYR TYR B B | 256 256 | . 97.212  | 126.532 | -8.744  | 1.00 |
| 11.35     | 1 . . |     |                   |         |           |         |         |      |
| ATOM 5270 | O     | O   | . TYR TYR TYR B B | 256 256 | . 98.198  | 126.767 | -9.450  | 1.00 |
| 12.40     | 1 . . |     |                   |         |           |         |         |      |
| ATOM 5271 | N     | N   | . ASP ASP ASP B B | 257 257 | . 97.249  | 126.185 | -7.459  | 1.00 |
| 13.50     | 1 . . |     |                   |         |           |         |         |      |
| ATOM 5272 | CA    | CA  | . ASP ASP ASP B B | 257 257 | . 98.492  | 126.171 | -6.701  | 1.00 |
| 15.29     | 1 . . |     |                   |         |           |         |         |      |
| ATOM 5273 | CB    | CB  | . ASP ASP ASP B B | 257 257 | . 98.367  | 126.987 | -5.409  | 1.00 |
| 16.47     | 1 . . |     |                   |         |           |         |         |      |
| ATOM 5274 | CG    | CG  | . ASP ASP ASP B B | 257 257 | . 99.712  | 127.358 | -4.817  | 1.00 |
| 20.36     | 1 . . |     |                   |         |           |         |         |      |
| ATOM 5275 | OD1   | OD1 | . ASP ASP ASP B B | 257 257 | . 100.769 | 127.124 | -5.469  | 1.00 |
| 18.79     | 1 . . |     |                   |         |           |         |         |      |
| ATOM 5276 | OD2   | OD2 | . ASP ASP ASP B B | 257 257 | . 99.690  | 127.908 | -3.700  | 1.00 |
| 23.38     | 1 . . |     |                   |         |           |         |         |      |
| ATOM 5277 | C     | C   | . ASP ASP ASP B B | 257 257 | . 98.821  | 124.753 | -6.297  | 1.00 |
| 15.64     | 1 . . |     |                   |         |           |         |         |      |
| ATOM 5278 | O     | O   | . ASP ASP ASP B B | 257 257 | . 98.237  | 124.230 | -5.355  | 1.00 |
| 14.82     | 1 . . |     |                   |         |           |         |         |      |
| ATOM 5279 | N     | N   | . LEU LEU LEU B B | 258 258 | . 99.753  | 124.143 | -7.010  | 1.00 |
| 16.61     | 1 . . |     |                   |         |           |         |         |      |
| ATOM 5280 | CA    | CA  | . LEU LEU LEU B B | 258 258 | . 100.125 | 122.773 | -6.652  | 1.00 |
| 18.15     | 1 . . |     |                   |         |           |         |         |      |



|           |       |     |                   |         |           |         |        |      |
|-----------|-------|-----|-------------------|---------|-----------|---------|--------|------|
| ATOM 5281 | CB    | CB  | . LEU LEU LEU B B | 258 258 | . 100.637 | 121.989 | -7.874 | 1.00 |
| 15.51     | 1 . . |     |                   |         |           |         |        |      |
| ATOM 5282 | CG    | CG  | . LEU LEU LEU B B | 258 258 | . 99.681  | 121.676 | -9.045 | 1.00 |
| 12.89     | 1 . . |     |                   |         |           |         |        |      |
| ATOM 5283 | CD1   | CD1 | . LEU LEU LEU B B | 258 258 | . 100.322 | 120.618 | -9.966 | 1.00 |
| 13.06     | 1 . . |     |                   |         |           |         |        |      |
| ATOM 5284 | CD2   | CD2 | . LEU LEU LEU B B | 258 258 | . 98.343  | 121.188 | -8.630 | 1.00 |
| 12.76     | 1 . . |     |                   |         |           |         |        |      |
| ATOM 5285 | C     | C   | . LEU LEU LEU B B | 258 258 | . 101.057 | 122.653 | -5.419 | 1.00 |
| 20.38     | 1 . . |     |                   |         |           |         |        |      |
| ATOM 5286 | O     | O   | . LEU LEU LEU B B | 258 258 | . 101.719 | 121.642 | -5.216 | 1.00 |
| 20.55     | 1 . . |     |                   |         |           |         |        |      |
| ATOM 5287 | N     | N   | . ASP ASP ASP B B | 259 259 | . 101.083 | 123.709 | -4.605 | 1.00 |
| 23.10     | 1 . . |     |                   |         |           |         |        |      |
| ATOM 5288 | CA    | CA  | . ASP ASP ASP B B | 259 259 | . 101.677 | 123.680 | -3.264 | 1.00 |
| 24.28     | 1 . . |     |                   |         |           |         |        |      |
| ATOM 5289 | CB    | CB  | . ASP ASP ASP B B | 259 259 | . 103.144 | 124.019 | -3.318 | 1.00 |
| 23.59     | 1 . . |     |                   |         |           |         |        |      |
| ATOM 5290 | CG    | CG  | . ASP ASP ASP B B | 259 259 | . 103.892 | 123.340 | -2.233 | 1.00 |
| 20.85     | 1 . . |     |                   |         |           |         |        |      |
| ATOM 5291 | OD1   | OD1 | . ASP ASP ASP B B | 259 259 | . 103.215 | 122.679 | -1.374 | 1.00 |
| 22.38     | 1 . . |     |                   |         |           |         |        |      |
| ATOM 5292 | OD2   | OD2 | . ASP ASP ASP B B | 259 259 | . 105.123 | 123.459 | -2.237 | 1.00 |
| 13.45     | 1 . . |     |                   |         |           |         |        |      |
| ATOM 5293 | C     | C   | . ASP ASP ASP B B | 259 259 | . 100.993 | 124.518 | -2.161 | 1.00 |
| 25.77     | 1 . . |     |                   |         |           |         |        |      |
| ATOM 5294 | O     | O   | . ASP ASP ASP B B | 259 259 | . 101.476 | 124.609 | -1.008 | 1.00 |
| 24.18     | 1 . . |     |                   |         |           |         |        |      |
| ATOM 5295 | N     | N   | . PHE PHE PHE B B | 260 260 | . 99.877  | 125.127 | -2.499 | 1.00 |
| 27.43     | 1 . . |     |                   |         |           |         |        |      |
| ATOM 5296 | CA    | CA  | . PHE PHE PHE B B | 260 260 | . 98.983  | 125.713 | -1.498 | 1.00 |
| 29.29     | 1 . . |     |                   |         |           |         |        |      |
| ATOM 5297 | CB    | CB  | . PHE PHE PHE B B | 260 260 | . 97.543  | 125.475 | -1.930 | 1.00 |
| 29.25     | 1 . . |     |                   |         |           |         |        |      |
| ATOM 5298 | CG    | CG  | . PHE PHE PHE B B | 260 260 | . 97.011  | 124.180 | -1.471 | 1.00 |
| 26.96     | 1 . . |     |                   |         |           |         |        |      |
| ATOM 5299 | CD1   | CD1 | . PHE PHE PHE B B | 260 260 | . 96.226  | 124.096 | -0.337 | 1.00 |
| 25.28     | 1 . . |     |                   |         |           |         |        |      |
| ATOM 5300 | CE1   | CE1 | . PHE PHE PHE B B | 260 260 | . 95.752  | 122.903 | 0.103  | 1.00 |
| 23.41     | 1 . . |     |                   |         |           |         |        |      |
| ATOM 5301 | CZ    | CZ  | . PHE PHE PHE B B | 260 260 | . 96.077  | 121.734 | -0.601 | 1.00 |
| 24.21     | 1 . . |     |                   |         |           |         |        |      |
| ATOM 5302 | CE2   | CE2 | . PHE PHE PHE B B | 260 260 | . 96.873  | 121.813 | -1.718 | 1.00 |
| 23.26     | 1 . . |     |                   |         |           |         |        |      |
| ATOM 5303 | CD2   | CD2 | . PHE PHE PHE B B | 260 260 | . 97.349  | 123.013 | -2.149 | 1.00 |
| 25.91     | 1 . . |     |                   |         |           |         |        |      |
| ATOM 5304 | C     | C   | . PHE PHE PHE B B | 260 260 | . 99.135  | 125.284 | 0.002  | 1.00 |
| 30.93     | 1 . . |     |                   |         |           |         |        |      |
| ATOM 5305 | O     | O   | . PHE PHE PHE B B | 260 260 | . 98.780  | 126.082 | 0.899  | 1.00 |
| 31.07     | 1 . . |     |                   |         |           |         |        |      |
| ATOM 5306 | N     | N   | . LYS LYS LYS B B | 261 261 | . 99.591  | 124.047 | 0.284  | 1.00 |
| 31.55     | 1 . . |     |                   |         |           |         |        |      |
| ATOM 5307 | CA    | CA  | . LYS LYS LYS B B | 261 261 | . 99.873  | 123.613 | 1.678  | 1.00 |
| 32.22     | 1 . . |     |                   |         |           |         |        |      |

|           |       |                   |         |           |         |        |      |
|-----------|-------|-------------------|---------|-----------|---------|--------|------|
| ATOM 5308 | CB    | . LYS LYS LYS B B | 261 261 | . 99.808  | 122.109 | 1.841  | 1.00 |
| 32.01     | 1 . . |                   |         |           |         |        |      |
| ATOM 5309 | CG    | . LYS LYS LYS B B | 261 261 | . 98.611  | 121.629 | 2.625  | 1.00 |
| 30.55     | 1 . . |                   |         |           |         |        |      |
| ATOM 5310 | CD    | . LYS LYS LYS B B | 261 261 | . 98.632  | 120.122 | 2.819  | 1.00 |
| 26.86     | 1 . . |                   |         |           |         |        |      |
| ATOM 5311 | CE    | . LYS LYS LYS B B | 261 261 | . 98.988  | 119.362 | 1.530  | 1.00 |
| 26.67     | 1 . . |                   |         |           |         |        |      |
| ATOM 5312 | NZ    | . LYS LYS LYS B B | 261 261 | . 98.703  | 117.947 | 1.801  | 1.00 |
| 24.18     | 1 . . |                   |         |           |         |        |      |
| ATOM 5313 | C     | . LYS LYS LYS B B | 261 261 | . 101.192 | 124.106 | 2.289  | 1.00 |
| 33.21     | 1 . . |                   |         |           |         |        |      |
| ATOM 5314 | O     | . LYS LYS LYS B B | 261 261 | . 101.483 | 123.849 | 3.464  | 1.00 |
| 33.29     | 1 . . |                   |         |           |         |        |      |
| ATOM 5315 | N     | . SER SER SER B B | 262 262 | . 101.989 | 124.805 | 1.503  | 1.00 |
| 33.95     | 1 . . |                   |         |           |         |        |      |
| ATOM 5316 | CA    | . SER SER SER B B | 262 262 | . 103.125 | 125.524 | 2.051  | 1.00 |
| 35.09     | 1 . . |                   |         |           |         |        |      |
| ATOM 5317 | CB    | . SER SER SER B B | 262 262 | . 104.234 | 125.537 | 1.018  | 1.00 |
| 35.06     | 1 . . |                   |         |           |         |        |      |
| ATOM 5318 | OG    | . SER SER SER B B | 262 262 | . 104.675 | 124.222 | 0.764  | 1.00 |
| 32.97     | 1 . . |                   |         |           |         |        |      |
| ATOM 5319 | C     | . SER SER SER B B | 262 262 | . 102.695 | 126.964 | 2.413  | 1.00 |
| 36.33     | 1 . . |                   |         |           |         |        |      |
| ATOM 5320 | O     | . SER SER SER B B | 262 262 | . 101.540 | 127.342 | 2.172  | 1.00 |
| 36.45     | 1 . . |                   |         |           |         |        |      |
| ATOM 5321 | N     | . PRO PRO PRO B B | 263 263 | . 103.601 | 127.770 | 3.017  | 1.00 |
| 36.91     | 1 . . |                   |         |           |         |        |      |
| ATOM 5322 | CA    | . PRO PRO PRO B B | 263 263 | . 103.289 | 129.204 | 3.154  | 1.00 |
| 37.34     | 1 . . |                   |         |           |         |        |      |
| ATOM 5323 | CB    | . PRO PRO PRO B B | 263 263 | . 104.515 | 129.752 | 3.882  | 1.00 |
| 37.46     | 1 . . |                   |         |           |         |        |      |
| ATOM 5324 | CG    | . PRO PRO PRO B B | 263 263 | . 105.042 | 128.569 | 4.650  | 1.00 |
| 37.11     | 1 . . |                   |         |           |         |        |      |
| ATOM 5325 | CD    | . PRO PRO PRO B B | 263 263 | . 104.839 | 127.412 | 3.742  | 1.00 |
| 37.13     | 1 . . |                   |         |           |         |        |      |
| ATOM 5326 | C     | . PRO PRO PRO B B | 263 263 | . 103.125 | 129.896 | 1.789  | 1.00 |
| 37.32     | 1 . . |                   |         |           |         |        |      |
| ATOM 5327 | O     | . PRO PRO PRO B B | 263 263 | . 103.933 | 129.644 | 0.877  | 1.00 |
| 37.72     | 1 . . |                   |         |           |         |        |      |
| ATOM 5328 | N     | . THR THR THR B B | 264 264 | . 102.102 | 130.751 | 1.666  | 1.00 |
| 37.06     | 1 . . |                   |         |           |         |        |      |
| ATOM 5329 | CA    | . THR THR THR B B | 264 264 | . 101.691 | 131.376 | 0.384  | 1.00 |
| 36.76     | 1 . . |                   |         |           |         |        |      |
| ATOM 5330 | CB    | . THR THR THR B B | 264 264 | . 100.692 | 132.555 | 0.593  | 1.00 |
| 36.77     | 1 . . |                   |         |           |         |        |      |
| ATOM 5331 | OG1   | . THR THR THR B B | 264 264 | . 99.404  | 132.032 | 0.945  | 1.00 |
| 38.51     | 1 . . |                   |         |           |         |        |      |
| ATOM 5332 | CG2   | . THR THR THR B B | 264 264 | . 100.516 | 133.395 | -0.667 | 1.00 |
| 37.46     | 1 . . |                   |         |           |         |        |      |
| ATOM 5333 | C     | . THR THR THR B B | 264 264 | . 102.858 | 131.746 | -0.553 | 1.00 |
| 36.09     | 1 . . |                   |         |           |         |        |      |
| ATOM 5334 | O     | . THR THR THR B B | 264 264 | . 103.981 | 132.035 | -0.091 | 1.00 |
| 36.13     | 1 . . |                   |         |           |         |        |      |

|           |       |     |                   |         |                               |
|-----------|-------|-----|-------------------|---------|-------------------------------|
| ATOM 5335 | N     | N   | . ASP ASP ASP B B | 265 265 | . 102.572 131.696 -1.861 1.00 |
| 35.12     | 1 . . |     |                   |         |                               |
| ATOM 5336 | CA    | CA  | . ASP ASP ASP B B | 265 265 | . 103.508 132.033 -2.927 1.00 |
| 34.22     | 1 . . |     |                   |         |                               |
| ATOM 5337 | CB    | CB  | . ASP ASP ASP B B | 265 265 | . 104.643 131.005 -2.965 1.00 |
| 33.96     | 1 . . |     |                   |         |                               |
| ATOM 5338 | CG    | CG  | . ASP ASP ASP B B | 265 265 | . 105.693 131.327 -3.994 1.00 |
| 32.95     | 1 . . |     |                   |         |                               |
| ATOM 5339 | OD1   | OD1 | . ASP ASP ASP B B | 265 265 | . 105.626 132.413 -4.608 1.00 |
| 31.73     | 1 . . |     |                   |         |                               |
| ATOM 5340 | OD2   | OD2 | . ASP ASP ASP B B | 265 265 | . 106.579 130.472 -4.197 1.00 |
| 30.82     | 1 . . |     |                   |         |                               |
| ATOM 5341 | C     | C   | . ASP ASP ASP B B | 265 265 | . 102.779 132.077 -4.282 1.00 |
| 34.21     | 1 . . |     |                   |         |                               |
| ATOM 5342 | O     | O   | . ASP ASP ASP B B | 265 265 | . 102.690 131.043 -4.973 1.00 |
| 34.04     | 1 . . |     |                   |         |                               |
| ATOM 5343 | N     | N   | . PRO PRO PRO B B | 266 266 | . 102.252 133.266 -4.672 1.00 |
| 33.94     | 1 . . |     |                   |         |                               |
| ATOM 5344 | CA    | CA  | . PRO PRO PRO B B | 266 266 | . 101.576 133.449 -5.962 1.00 |
| 33.57     | 1 . . |     |                   |         |                               |
| ATOM 5345 | CB    | CB  | . PRO PRO PRO B B | 266 266 | . 101.451 134.972 -6.092 1.00 |
| 33.27     | 1 . . |     |                   |         |                               |
| ATOM 5346 | CG    | CG  | . PRO PRO PRO B B | 266 266 | . 101.315 135.427 -4.727 1.00 |
| 34.61     | 1 . . |     |                   |         |                               |
| ATOM 5347 | CD    | CD  | . PRO PRO PRO B B | 266 266 | . 102.156 134.493 -3.858 1.00 |
| 34.13     | 1 . . |     |                   |         |                               |
| ATOM 5348 | C     | C   | . PRO PRO PRO B B | 266 266 | . 102.360 132.910 -7.133 1.00 |
| 33.10     | 1 . . |     |                   |         |                               |
| ATOM 5349 | O     | O   | . PRO PRO PRO B B | 266 266 | . 101.748 132.514 -8.133 1.00 |
| 32.71     | 1 . . |     |                   |         |                               |
| ATOM 5350 | N     | N   | . SER SER SER B B | 267 267 | . 103.688 132.839 -6.989 1.00 |
| 32.84     | 1 . . |     |                   |         |                               |
| ATOM 5351 | CA    | CA  | . SER SER SER B B | 267 267 | . 104.571 132.527 -8.141 1.00 |
| 32.49     | 1 . . |     |                   |         |                               |
| ATOM 5352 | CB    | CB  | . SER SER SER B B | 267 267 | . 106.022 132.991 -7.907 1.00 |
| 32.26     | 1 . . |     |                   |         |                               |
| ATOM 5353 | OG    | OG  | . SER SER SER B B | 267 267 | . 106.599 132.425 -6.751 1.00 |
| 31.14     | 1 . . |     |                   |         |                               |
| ATOM 5354 | C     | C   | . SER SER SER B B | 267 267 | . 104.518 131.070 -8.605 1.00 |
| 31.96     | 1 . . |     |                   |         |                               |
| ATOM 5355 | O     | O   | . SER SER SER B B | 267 267 | . 104.867 130.746 -9.753 1.00 |
| 31.97     | 1 . . |     |                   |         |                               |
| ATOM 5356 | N     | N   | . ARG ARG ARG B B | 268 268 | . 104.062 130.200 -7.713 1.00 |
| 31.30     | 1 . . |     |                   |         |                               |
| ATOM 5357 | CA    | CA  | . ARG ARG ARG B B | 268 268 | . 103.954 128.786 -8.004 1.00 |
| 29.86     | 1 . . |     |                   |         |                               |
| ATOM 5358 | CB    | CB  | . ARG ARG ARG B B | 268 268 | . 104.195 127.978 -6.725 1.00 |
| 30.09     | 1 . . |     |                   |         |                               |
| ATOM 5359 | CG    | CG  | . ARG ARG ARG B B | 268 268 | . 103.171 128.209 -5.629 1.00 |
| 30.43     | 1 . . |     |                   |         |                               |
| ATOM 5360 | CD    | CD  | . ARG ARG ARG B B | 268 268 | . 103.696 127.737 -4.320 1.00 |
| 32.33     | 1 . . |     |                   |         |                               |
| ATOM 5361 | NE    | NE  | . ARG ARG ARG B B | 268 268 | . 102.824 128.132 -3.225 1.00 |
| 35.64     | 1 . . |     |                   |         |                               |

|               |     |                             |         |         |         |      |
|---------------|-----|-----------------------------|---------|---------|---------|------|
| ATOM 5362 CZ  | CZ  | . ARG ARG ARG B B 268 268 . | 103.139 | 128.013 | -1.936  | 1.00 |
| 38.27 1 . .   |     |                             |         |         |         |      |
| ATOM 5363 NH1 | NH1 | . ARG ARG ARG B B 268 268 . | 104.312 | 127.508 | -1.563  | 1.00 |
| 39.45 1 . .   |     |                             |         |         |         |      |
| ATOM 5364 NH2 | NH2 | . ARG ARG ARG B B 268 268 . | 102.273 | 128.385 | -1.013  | 1.00 |
| 39.76 1 . .   |     |                             |         |         |         |      |
| ATOM 5365 C   | C   | . ARG ARG ARG B B 268 268 . | 102.612 | 128.401 | -8.667  | 1.00 |
| 29.00 1 . .   |     |                             |         |         |         |      |
| ATOM 5366 O   | O   | . ARG ARG ARG B B 268 268 . | 102.370 | 127.222 | -8.923  | 1.00 |
| 29.00 1 . .   |     |                             |         |         |         |      |
| ATOM 5367 N   | N   | . TYR TYR TYR B B 269 269 . | 101.772 | 129.383 | -8.983  | 1.00 |
| 27.14 1 . .   |     |                             |         |         |         |      |
| ATOM 5368 CA  | CA  | . TYR TYR TYR B B 269 269 . | 100.447 | 129.097 | -9.552  | 1.00 |
| 25.22 1 . .   |     |                             |         |         |         |      |
| ATOM 5369 CB  | CB  | . TYR TYR TYR B B 269 269 . | 99.477  | 130.284 | -9.381  | 1.00 |
| 25.12 1 . .   |     |                             |         |         |         |      |
| ATOM 5370 CG  | CG  | . TYR TYR TYR B B 269 269 . | 99.158  | 130.744 | -7.957  | 1.00 |
| 26.67 1 . .   |     |                             |         |         |         |      |
| ATOM 5371 CD1 | CD1 | . TYR TYR TYR B B 269 269 . | 98.460  | 131.950 | -7.749  | 1.00 |
| 27.23 1 . .   |     |                             |         |         |         |      |
| ATOM 5372 CE1 | CE1 | . TYR TYR TYR B B 269 269 . | 98.158  | 132.409 | -6.484  | 1.00 |
| 29.13 1 . .   |     |                             |         |         |         |      |
| ATOM 5373 CZ  | CZ  | . TYR TYR TYR B B 269 269 . | 98.549  | 131.677 | -5.373  | 1.00 |
| 29.86 1 . .   |     |                             |         |         |         |      |
| ATOM 5374 OH  | OH  | . TYR TYR TYR B B 269 269 . | 98.227  | 132.137 | -4.112  | 1.00 |
| 29.19 1 . .   |     |                             |         |         |         |      |
| ATOM 5375 CE2 | CE2 | . TYR TYR TYR B B 269 269 . | 99.216  | 130.472 | -5.534  | 1.00 |
| 29.14 1 . .   |     |                             |         |         |         |      |
| ATOM 5376 CD2 | CD2 | . TYR TYR TYR B B 269 269 . | 99.536  | 130.012 | -6.832  | 1.00 |
| 26.74 1 . .   |     |                             |         |         |         |      |
| ATOM 5377 C   | C   | . TYR TYR TYR B B 269 269 . | 100.481 | 128.662 | -11.029 | 1.00 |
| 23.15 1 . .   |     |                             |         |         |         |      |
| ATOM 5378 O   | O   | . TYR TYR TYR B B 269 269 . | 101.293 | 129.143 | -11.805 | 1.00 |
| 23.74 1 . .   |     |                             |         |         |         |      |
| ATOM 5379 N   | N   | . ILE ILE ILE B B 270 270 . | 99.588  | 127.743 | -11.424 | 1.00 |
| 20.38 1 . .   |     |                             |         |         |         |      |
| ATOM 5380 CA  | CA  | . ILE ILE ILE B B 270 270 . | 99.438  | 127.374 | -12.842 | 1.00 |
| 17.22 1 . .   |     |                             |         |         |         |      |
| ATOM 5381 CB  | CB  | . ILE ILE ILE B B 270 270 . | 99.942  | 125.891 | -13.122 | 1.00 |
| 17.52 1 . .   |     |                             |         |         |         |      |
| ATOM 5382 CG1 | CG1 | . ILE ILE ILE B B 270 270 . | 98.888  | 124.848 | -12.708 | 1.00 |
| 17.50 1 . .   |     |                             |         |         |         |      |
| ATOM 5383 CD1 | CD1 | . ILE ILE ILE B B 270 270 . | 99.335  | 123.419 | -13.006 | 1.00 |
| 16.19 1 . .   |     |                             |         |         |         |      |
| ATOM 5384 CG2 | CG2 | . ILE ILE ILE B B 270 270 . | 101.376 | 125.634 | -12.524 | 1.00 |
| 16.42 1 . .   |     |                             |         |         |         |      |
| ATOM 5385 C   | C   | . ILE ILE ILE B B 270 270 . | 97.990  | 127.561 | -13.369 | 1.00 |
| 15.68 1 . .   |     |                             |         |         |         |      |
| ATOM 5386 O   | O   | . ILE ILE ILE B B 270 270 . | 97.055  | 127.582 | -12.571 | 1.00 |
| 15.83 1 . .   |     |                             |         |         |         |      |
| ATOM 5387 N   | N   | . THR THR THR B B 271 271 . | 97.831  | 127.671 | -14.691 | 1.00 |
| 13.35 1 . .   |     |                             |         |         |         |      |
| ATOM 5388 CA  | CA  | . THR THR THR B B 271 271 . | 96.518  | 127.774 | -15.314 | 1.00 |
| 13.45 1 . .   |     |                             |         |         |         |      |

|           |     |     |                   |     |     |           |         |         |      |
|-----------|-----|-----|-------------------|-----|-----|-----------|---------|---------|------|
| ATOM 5389 | CB  | CB  | . THR THR THR B B | 271 | 271 | . 96.508  | 128.459 | -16.736 | 1.00 |
| 11.78     | 1   | . . |                   |     |     |           |         |         |      |
| ATOM 5390 | OG1 | OG1 | . THR THR THR B B | 271 | 271 | . 96.822  | 127.476 | -17.744 | 1.00 |
| 13.50     | 1   | . . |                   |     |     |           |         |         |      |
| ATOM 5391 | CG2 | CG2 | . THR THR THR B B | 271 | 271 | . 97.405  | 129.797 | -16.846 | 1.00 |
| 12.31     | 1   | . . |                   |     |     |           |         |         |      |
| ATOM 5392 | C   | C   | . THR THR THR B B | 271 | 271 | . 95.803  | 126.426 | -15.427 | 1.00 |
| 12.72     | 1   | . . |                   |     |     |           |         |         |      |
| ATOM 5393 | O   | O   | . THR THR THR B B | 271 | 271 | . 96.432  | 125.389 | -15.316 | 1.00 |
| 12.32     | 1   | . . |                   |     |     |           |         |         |      |
| ATOM 5394 | N   | N   | . GLY GLY GLY B B | 272 | 272 | . 94.494  | 126.479 | -15.677 | 1.00 |
| 11.18     | 1   | . . |                   |     |     |           |         |         |      |
| ATOM 5395 | CA  | CA  | . GLY GLY GLY B B | 272 | 272 | . 93.674  | 125.298 | -15.872 | 1.00 |
| 11.27     | 1   | . . |                   |     |     |           |         |         |      |
| ATOM 5396 | C   | C   | . GLY GLY GLY B B | 272 | 272 | . 94.204  | 124.505 | -17.056 | 1.00 |
| 10.43     | 1   | . . |                   |     |     |           |         |         |      |
| ATOM 5397 | O   | O   | . GLY GLY GLY B B | 272 | 272 | . 94.093  | 123.305 | -17.084 | 1.00 |
| 10.55     | 1   | . . |                   |     |     |           |         |         |      |
| ATOM 5398 | N   | N   | . ASP ASP ASP B B | 273 | 273 | . 94.748  | 125.169 | -18.069 | 1.00 |
| 11.00     | 1   | . . |                   |     |     |           |         |         |      |
| ATOM 5399 | CA  | CA  | . ASP ASP ASP B B | 273 | 273 | . 95.162  | 124.468 | -19.268 | 1.00 |
| 12.66     | 1   | . . |                   |     |     |           |         |         |      |
| ATOM 5400 | CB  | CB  | . ASP ASP ASP B B | 273 | 273 | . 95.368  | 125.436 | -20.448 | 1.00 |
| 14.48     | 1   | . . |                   |     |     |           |         |         |      |
| ATOM 5401 | CG  | CG  | . ASP ASP ASP B B | 273 | 273 | . 94.220  | 125.398 | -21.478 | 1.00 |
| 17.55     | 1   | . . |                   |     |     |           |         |         |      |
| ATOM 5402 | OD1 | OD1 | . ASP ASP ASP B B | 273 | 273 | . 93.001  | 125.417 | -21.140 | 1.00 |
| 19.19     | 1   | . . |                   |     |     |           |         |         |      |
| ATOM 5403 | OD2 | OD2 | . ASP ASP ASP B B | 273 | 273 | . 94.574  | 125.395 | -22.691 | 1.00 |
| 24.52     | 1   | . . |                   |     |     |           |         |         |      |
| ATOM 5404 | C   | C   | . ASP ASP ASP B B | 273 | 273 | . 96.452  | 123.721 | -18.902 | 1.00 |
| 12.51     | 1   | . . |                   |     |     |           |         |         |      |
| ATOM 5405 | O   | O   | . ASP ASP ASP B B | 273 | 273 | . 96.646  | 122.555 | -19.341 | 1.00 |
| 10.29     | 1   | . . |                   |     |     |           |         |         |      |
| ATOM 5406 | N   | N   | . GLN GLN GLN B B | 274 | 274 | . 97.268  | 124.333 | -18.032 | 1.00 |
| 13.32     | 1   | . . |                   |     |     |           |         |         |      |
| ATOM 5407 | CA  | CA  | . GLN GLN GLN B B | 274 | 274 | . 98.500  | 123.645 | -17.580 | 1.00 |
| 13.90     | 1   | . . |                   |     |     |           |         |         |      |
| ATOM 5408 | CB  | CB  | . GLN GLN GLN B B | 274 | 274 | . 99.490  | 124.542 | -16.840 | 1.00 |
| 14.75     | 1   | . . |                   |     |     |           |         |         |      |
| ATOM 5409 | CG  | CG  | . GLN GLN GLN B B | 274 | 274 | . 99.980  | 125.731 | -17.680 | 1.00 |
| 19.36     | 1   | . . |                   |     |     |           |         |         |      |
| ATOM 5410 | CD  | CD  | . GLN GLN GLN B B | 274 | 274 | . 100.742 | 126.744 | -16.847 | 1.00 |
| 20.49     | 1   | . . |                   |     |     |           |         |         |      |
| ATOM 5411 | OE1 | OE1 | . GLN GLN GLN B B | 274 | 274 | . 100.151 | 127.612 | -16.233 | 1.00 |
| 22.16     | 1   | . . |                   |     |     |           |         |         |      |
| ATOM 5412 | NE2 | NE2 | . GLN GLN GLN B B | 274 | 274 | . 102.065 | 126.605 | -16.799 | 1.00 |
| 23.34     | 1   | . . |                   |     |     |           |         |         |      |
| ATOM 5413 | C   | C   | . GLN GLN GLN B B | 274 | 274 | . 98.175  | 122.413 | -16.769 | 1.00 |
| 12.33     | 1   | . . |                   |     |     |           |         |         |      |
| ATOM 5414 | O   | O   | . GLN GLN GLN B B | 274 | 274 | . 98.797  | 121.322 | -16.953 | 1.00 |
| 11.76     | 1   | . . |                   |     |     |           |         |         |      |
| ATOM 5415 | N   | N   | . LEU LEU LEU B B | 275 | 275 | . 97.163  | 122.579 | -15.922 | 1.00 |
| 10.50     | 1   | . . |                   |     |     |           |         |         |      |

|           |       |     |                   |         |           |         |         |      |
|-----------|-------|-----|-------------------|---------|-----------|---------|---------|------|
| ATOM 5416 | CA    | CA  | . LEU LEU LEU B B | 275 275 | . 96.666  | 121.535 | -15.074 | 1.00 |
| 9.37      | 1 . . |     |                   |         |           |         |         |      |
| ATOM 5417 | CB    | CB  | . LEU LEU LEU B B | 275 275 | . 95.675  | 122.110 | -14.028 | 1.00 |
| 9.02      | 1 . . |     |                   |         |           |         |         |      |
| ATOM 5418 | CG    | CG  | . LEU LEU LEU B B | 275 275 | . 95.123  | 121.174 | -12.958 | 1.00 |
| 9.25      | 1 . . |     |                   |         |           |         |         |      |
| ATOM 5419 | CD1   | CD1 | . LEU LEU LEU B B | 275 275 | . 96.236  | 120.536 | -12.127 | 1.00 |
| 10.31     | 1 . . |     |                   |         |           |         |         |      |
| ATOM 5420 | CD2   | CD2 | . LEU LEU LEU B B | 275 275 | . 94.179  | 121.986 | -11.985 | 1.00 |
| 5.64      | 1 . . |     |                   |         |           |         |         |      |
| ATOM 5421 | C     | C   | . LEU LEU LEU B B | 275 275 | . 96.132  | 120.355 | -15.912 | 1.00 |
| 8.15      | 1 . . |     |                   |         |           |         |         |      |
| ATOM 5422 | O     | O   | . LEU LEU LEU B B | 275 275 | . 96.631  | 119.194 | -15.740 | 1.00 |
| 8.31      | 1 . . |     |                   |         |           |         |         |      |
| ATOM 5423 | N     | N   | . GLY GLY GLY B B | 276 276 | . 95.271  | 120.653 | -16.883 | 1.00 |
| 6.51      | 1 . . |     |                   |         |           |         |         |      |
| ATOM 5424 | CA    | CA  | . GLY GLY GLY B B | 276 276 | . 94.785  | 119.698 | -17.858 | 1.00 |
| 7.39      | 1 . . |     |                   |         |           |         |         |      |
| ATOM 5425 | C     | C   | . GLY GLY GLY B B | 276 276 | . 95.900  | 118.945 | -18.559 | 1.00 |
| 7.64      | 1 . . |     |                   |         |           |         |         |      |
| ATOM 5426 | O     | O   | . GLY GLY GLY B B | 276 276 | . 95.829  | 117.707 | -18.699 | 1.00 |
| 9.01      | 1 . . |     |                   |         |           |         |         |      |
| ATOM 5427 | N     | N   | . ALA ALA ALA B B | 277 277 | . 96.913  | 119.666 | -19.039 | 1.00 |
| 7.90      | 1 . . |     |                   |         |           |         |         |      |
| ATOM 5428 | CA    | CA  | . ALA ALA ALA B B | 277 277 | . 98.057  | 118.989 | -19.701 | 1.00 |
| 7.48      | 1 . . |     |                   |         |           |         |         |      |
| ATOM 5429 | CB    | CB  | . ALA ALA ALA B B | 277 277 | . 99.110  | 119.999 | -20.250 | 1.00 |
| 10.18     | 1 . . |     |                   |         |           |         |         |      |
| ATOM 5430 | C     | C   | . ALA ALA ALA B B | 277 277 | . 98.735  | 117.996 | -18.728 | 1.00 |
| 7.68      | 1 . . |     |                   |         |           |         |         |      |
| ATOM 5431 | O     | O   | . ALA ALA ALA B B | 277 277 | . 99.116  | 116.907 | -19.182 | 1.00 |
| 10.26     | 1 . . |     |                   |         |           |         |         |      |
| ATOM 5432 | N     | N   | . LEU LEU LEU B B | 278 278 | . 98.864  | 118.340 | -17.436 | 1.00 |
| 7.84      | 1 . . |     |                   |         |           |         |         |      |
| ATOM 5433 | CA    | CA  | . LEU LEU LEU B B | 278 278 | . 99.464  | 117.437 | -16.446 | 1.00 |
| 7.47      | 1 . . |     |                   |         |           |         |         |      |
| ATOM 5434 | CB    | CB  | . LEU LEU LEU B B | 278 278 | . 99.469  | 118.089 | -15.040 | 1.00 |
| 8.37      | 1 . . |     |                   |         |           |         |         |      |
| ATOM 5435 | CG    | CG  | . LEU LEU LEU B B | 278 278 | . 100.240 | 117.538 | -13.833 | 1.00 |
| 10.67     | 1 . . |     |                   |         |           |         |         |      |
| ATOM 5436 | CD1   | CD1 | . LEU LEU LEU B B | 278 278 | . 101.790 | 117.536 | -14.056 | 1.00 |
| 15.68     | 1 . . |     |                   |         |           |         |         |      |
| ATOM 5437 | CD2   | CD2 | . LEU LEU LEU B B | 278 278 | . 99.880  | 118.379 | -12.605 | 1.00 |
| 12.63     | 1 . . |     |                   |         |           |         |         |      |
| ATOM 5438 | C     | C   | . LEU LEU LEU B B | 278 278 | . 98.629  | 116.169 | -16.358 | 1.00 |
| 5.88      | 1 . . |     |                   |         |           |         |         |      |
| ATOM 5439 | O     | O   | . LEU LEU LEU B B | 278 278 | . 99.234  | 115.047 | -16.394 | 1.00 |
| 6.97      | 1 . . |     |                   |         |           |         |         |      |
| ATOM 5440 | N     | N   | . TYR TYR TYR B B | 279 279 | . 97.282  | 116.305 | -16.272 | 1.00 |
| 6.83      | 1 . . |     |                   |         |           |         |         |      |
| ATOM 5441 | CA    | CA  | . TYR TYR TYR B B | 279 279 | . 96.388  | 115.125 | -16.202 | 1.00 |
| 5.92      | 1 . . |     |                   |         |           |         |         |      |
| ATOM 5442 | CB    | CB  | . TYR TYR TYR B B | 279 279 | . 94.971  | 115.511 | -16.061 | 1.00 |
| 4.87      | 1 . . |     |                   |         |           |         |         |      |

|           |       |     |                             |         |         |         |      |
|-----------|-------|-----|-----------------------------|---------|---------|---------|------|
| ATOM 5443 | CG    | CG  | . TYR TYR TYR B B 279 279 . | 94.633  | 116.340 | -14.855 | 1.00 |
| 2.00      | 1 . . |     |                             |         |         |         |      |
| ATOM 5444 | CD1   | CD1 | . TYR TYR TYR B B 279 279 . | 95.118  | 116.074 | -13.616 | 1.00 |
| 2.53      | 1 . . |     |                             |         |         |         |      |
| ATOM 5445 | CE1   | CE1 | . TYR TYR TYR B B 279 279 . | 94.754  | 116.885 | -12.551 | 1.00 |
| 2.45      | 1 . . |     |                             |         |         |         |      |
| ATOM 5446 | CZ    | CZ  | . TYR TYR TYR B B 279 279 . | 93.792  | 117.862 | -12.653 | 1.00 |
| 3.76      | 1 . . |     |                             |         |         |         |      |
| ATOM 5447 | OH    | OH  | . TYR TYR TYR B B 279 279 . | 93.447  | 118.636 | -11.551 | 1.00 |
| 3.94      | 1 . . |     |                             |         |         |         |      |
| ATOM 5448 | CE2   | CE2 | . TYR TYR TYR B B 279 279 . | 93.251  | 118.139 | -13.905 | 1.00 |
| 2.79      | 1 . . |     |                             |         |         |         |      |
| ATOM 5449 | CD2   | CD2 | . TYR TYR TYR B B 279 279 . | 93.665  | 117.352 | -14.980 | 1.00 |
| 3.88      | 1 . . |     |                             |         |         |         |      |
| ATOM 5450 | C     | C   | . TYR TYR TYR B B 279 279 . | 96.506  | 114.209 | -17.461 | 1.00 |
| 4.60      | 1 . . |     |                             |         |         |         |      |
| ATOM 5451 | O     | O   | . TYR TYR TYR B B 279 279 . | 96.414  | 112.974 | -17.409 | 1.00 |
| 6.17      | 1 . . |     |                             |         |         |         |      |
| ATOM 5452 | N     | N   | . GLN GLN GLN B B 280 280 . | 96.730  | 114.817 | -18.623 | 1.00 |
| 5.59      | 1 . . |     |                             |         |         |         |      |
| ATOM 5453 | CA    | CA  | . GLN GLN GLN B B 280 280 . | 96.885  | 114.008 | -19.823 | 1.00 |
| 5.44      | 1 . . |     |                             |         |         |         |      |
| ATOM 5454 | CB    | CB  | . GLN GLN GLN B B 280 280 . | 96.936  | 114.921 | -21.057 | 1.00 |
| 5.91      | 1 . . |     |                             |         |         |         |      |
| ATOM 5455 | CG    | CG  | . GLN GLN GLN B B 280 280 . | 95.647  | 115.664 | -21.353 | 1.00 |
| 10.74     | 1 . . |     |                             |         |         |         |      |
| ATOM 5456 | CD    | CD  | . GLN GLN GLN B B 280 280 . | 94.583  | 114.857 | -22.093 | 1.00 |
| 14.07     | 1 . . |     |                             |         |         |         |      |
| ATOM 5457 | OE1   | OE1 | . GLN GLN GLN B B 280 280 . | 94.759  | 113.657 | -22.366 | 1.00 |
| 17.33     | 1 . . |     |                             |         |         |         |      |
| ATOM 5458 | NE2   | NE2 | . GLN GLN GLN B B 280 280 . | 93.437  | 115.526 | -22.438 | 1.00 |
| 14.19     | 1 . . |     |                             |         |         |         |      |
| ATOM 5459 | C     | C   | . GLN GLN GLN B B 280 280 . | 98.145  | 113.180 | -19.696 | 1.00 |
| 5.33      | 1 . . |     |                             |         |         |         |      |
| ATOM 5460 | O     | O   | . GLN GLN GLN B B 280 280 . | 98.148  | 112.019 | -20.154 | 1.00 |
| 6.07      | 1 . . |     |                             |         |         |         |      |
| ATOM 5461 | N     | N   | . ASP ASP ASP B B 281 281 . | 99.219  | 113.736 | -19.127 | 1.00 |
| 6.35      | 1 . . |     |                             |         |         |         |      |
| ATOM 5462 | CA    | CA  | . ASP ASP ASP B B 281 281 . | 100.416 | 112.957 | -18.912 | 1.00 |
| 7.81      | 1 . . |     |                             |         |         |         |      |
| ATOM 5463 | CB    | CB  | . ASP ASP ASP B B 281 281 . | 101.607 | 113.791 | -18.398 | 1.00 |
| 9.55      | 1 . . |     |                             |         |         |         |      |
| ATOM 5464 | CG    | CG  | . ASP ASP ASP B B 281 281 . | 102.084 | 114.807 | -19.430 | 1.00 |
| 13.50     | 1 . . |     |                             |         |         |         |      |
| ATOM 5465 | OD1   | OD1 | . ASP ASP ASP B B 281 281 . | 101.735 | 114.693 | -20.657 | 1.00 |
| 17.50     | 1 . . |     |                             |         |         |         |      |
| ATOM 5466 | OD2   | OD2 | . ASP ASP ASP B B 281 281 . | 102.759 | 115.760 | -18.998 | 1.00 |
| 18.74     | 1 . . |     |                             |         |         |         |      |
| ATOM 5467 | C     | C   | . ASP ASP ASP B B 281 281 . | 100.146 | 111.830 | -17.955 | 1.00 |
| 7.49      | 1 . . |     |                             |         |         |         |      |
| ATOM 5468 | O     | O   | . ASP ASP ASP B B 281 281 . | 100.647 | 110.693 | -18.155 | 1.00 |
| 7.71      | 1 . . |     |                             |         |         |         |      |
| ATOM 5469 | N     | N   | . PHE PHE PHE B B 282 282 . | 99.397  | 112.109 | -16.889 | 1.00 |
| 5.64      | 1 . . |     |                             |         |         |         |      |





|           |       |     |                             |         |         |         |      |
|-----------|-------|-----|-----------------------------|---------|---------|---------|------|
| ATOM 5497 | O     | O   | . ARG ARG ARG B B 284 284 . | 100.540 | 106.332 | -20.391 | 1.00 |
| 6.40      | 1 . . |     |                             |         |         |         |      |
| ATOM 5498 | N     | N   | . ASP ASP ASP B B 285 285 . | 100.716 | 107.850 | -18.783 | 1.00 |
| 5.49      | 1 . . |     |                             |         |         |         |      |
| ATOM 5499 | CA    | CA  | . ASP ASP ASP B B 285 285 . | 101.891 | 107.217 | -18.129 | 1.00 |
| 6.52      | 1 . . |     |                             |         |         |         |      |
| ATOM 5500 | CB    | CB  | . ASP ASP ASP B B 285 285 . | 102.832 | 108.298 | -17.563 | 1.00 |
| 8.56      | 1 . . |     |                             |         |         |         |      |
| ATOM 5501 | CG    | CG  | . ASP ASP ASP B B 285 285 . | 103.544 | 109.120 | -18.617 | 1.00 |
| 10.86     | 1 . . |     |                             |         |         |         |      |
| ATOM 5502 | OD1   | OD1 | . ASP ASP ASP B B 285 285 . | 103.574 | 108.735 | -19.822 | 1.00 |
| 16.44     | 1 . . |     |                             |         |         |         |      |
| ATOM 5503 | OD2   | OD2 | . ASP ASP ASP B B 285 285 . | 104.113 | 110.166 | -18.209 | 1.00 |
| 14.59     | 1 . . |     |                             |         |         |         |      |
| ATOM 5504 | C     | C   | . ASP ASP ASP B B 285 285 . | 101.604 | 106.259 | -16.994 | 1.00 |
| 7.19      | 1 . . |     |                             |         |         |         |      |
| ATOM 5505 | O     | O   | . ASP ASP ASP B B 285 285 . | 102.488 | 105.527 | -16.623 | 1.00 |
| 8.15      | 1 . . |     |                             |         |         |         |      |
| ATOM 5506 | N     | N   | . TYR TYR TYR B B 286 286 . | 100.376 | 106.287 | -16.484 | 1.00 |
| 5.37      | 1 . . |     |                             |         |         |         |      |
| ATOM 5507 | CA    | CA  | . TYR TYR TYR B B 286 286 . | 99.836  | 105.481 | -15.351 | 1.00 |
| 4.61      | 1 . . |     |                             |         |         |         |      |
| ATOM 5508 | CB    | CB  | . TYR TYR TYR B B 286 286 . | 99.786  | 106.343 | -14.080 | 1.00 |
| 5.14      | 1 . . |     |                             |         |         |         |      |
| ATOM 5509 | CG    | CG  | . TYR TYR TYR B B 286 286 . | 101.157 | 106.905 | -13.750 | 1.00 |
| 5.88      | 1 . . |     |                             |         |         |         |      |
| ATOM 5510 | CD1   | CD1 | . TYR TYR TYR B B 286 286 . | 102.122 | 106.132 | -13.110 | 1.00 |
| 7.69      | 1 . . |     |                             |         |         |         |      |
| ATOM 5511 | CE1   | CE1 | . TYR TYR TYR B B 286 286 . | 103.385 | 106.682 | -12.851 | 1.00 |
| 10.37     | 1 . . |     |                             |         |         |         |      |
| ATOM 5512 | CZ    | CZ  | . TYR TYR TYR B B 286 286 . | 103.637 | 108.040 | -13.184 | 1.00 |
| 12.12     | 1 . . |     |                             |         |         |         |      |
| ATOM 5513 | OH    | OH  | . TYR TYR TYR B B 286 286 . | 104.855 | 108.672 | -12.936 | 1.00 |
| 16.02     | 1 . . |     |                             |         |         |         |      |
| ATOM 5514 | CE2   | CE2 | . TYR TYR TYR B B 286 286 . | 102.651 | 108.805 | -13.775 | 1.00 |
| 11.16     | 1 . . |     |                             |         |         |         |      |
| ATOM 5515 | CD2   | CD2 | . TYR TYR TYR B B 286 286 . | 101.439 | 108.260 | -14.012 | 1.00 |
| 9.24      | 1 . . |     |                             |         |         |         |      |
| ATOM 5516 | C     | C   | . TYR TYR TYR B B 286 286 . | 98.470  | 104.966 | -15.717 | 1.00 |
| 4.29      | 1 . . |     |                             |         |         |         |      |
| ATOM 5517 | O     | O   | . TYR TYR TYR B B 286 286 . | 97.767  | 105.543 | -16.548 | 1.00 |
| 3.84      | 1 . . |     |                             |         |         |         |      |
| ATOM 5518 | N     | N   | . PRO PRO PRO B B 287 287 . | 98.027  | 103.875 | -15.044 | 1.00 |
| 3.72      | 1 . . |     |                             |         |         |         |      |
| ATOM 5519 | CA    | CA  | . PRO PRO PRO B B 287 287 . | 96.711  | 103.302 | -15.264 | 1.00 |
| 4.10      | 1 . . |     |                             |         |         |         |      |
| ATOM 5520 | CB    | CB  | . PRO PRO PRO B B 287 287 . | 96.826  | 101.898 | -14.651 | 1.00 |
| 5.64      | 1 . . |     |                             |         |         |         |      |
| ATOM 5521 | CG    | CG  | . PRO PRO PRO B B 287 287 . | 97.893  | 102.052 | -13.624 | 1.00 |
| 5.76      | 1 . . |     |                             |         |         |         |      |
| ATOM 5522 | CD    | CD  | . PRO PRO PRO B B 287 287 . | 98.850  | 103.070 | -14.131 | 1.00 |
| 4.69      | 1 . . |     |                             |         |         |         |      |
| ATOM 5523 | C     | C   | . PRO PRO PRO B B 287 287 . | 95.627  | 104.092 | -14.590 | 1.00 |
| 3.23      | 1 . . |     |                             |         |         |         |      |







|           |       |     |                             |        |         |         |      |
|-----------|-------|-----|-----------------------------|--------|---------|---------|------|
| ATOM 5605 | N     | N   | . ASP ASP ASP B B 298 298 . | 83.611 | 126.087 | -9.668  | 1.00 |
| 2.27      | 1 . . |     |                             |        |         |         |      |
| ATOM 5606 | CA    | CA  | . ASP ASP ASP B B 298 298 . | 82.967 | 127.112 | -10.510 | 1.00 |
| 2.53      | 1 . . |     |                             |        |         |         |      |
| ATOM 5607 | CB    | CB  | . ASP ASP ASP B B 298 298 . | 82.977 | 128.478 | -9.800  | 1.00 |
| 2.16      | 1 . . |     |                             |        |         |         |      |
| ATOM 5608 | CG    | CG  | . ASP ASP ASP B B 298 298 . | 81.964 | 128.590 | -8.715  | 1.00 |
| 2.84      | 1 . . |     |                             |        |         |         |      |
| ATOM 5609 | OD1   | OD1 | . ASP ASP ASP B B 298 298 . | 80.801 | 128.366 | -8.985  | 1.00 |
| 4.68      | 1 . . |     |                             |        |         |         |      |
| ATOM 5610 | OD2   | OD2 | . ASP ASP ASP B B 298 298 . | 82.409 | 128.923 | -7.607  | 1.00 |
| 5.84      | 1 . . |     |                             |        |         |         |      |
| ATOM 5611 | C     | C   | . ASP ASP ASP B B 298 298 . | 83.612 | 127.238 | -11.909 | 1.00 |
| 2.29      | 1 . . |     |                             |        |         |         |      |
| ATOM 5612 | O     | O   | . ASP ASP ASP B B 298 298 . | 83.165 | 128.076 | -12.716 | 1.00 |
| 2.11      | 1 . . |     |                             |        |         |         |      |
| ATOM 5613 | N     | N   | . ASP ASP ASP B B 299 299 . | 84.707 | 126.511 | -12.146 | 1.00 |
| 2.10      | 1 . . |     |                             |        |         |         |      |
| ATOM 5614 | CA    | CA  | . ASP ASP ASP B B 299 299 . | 85.500 | 126.682 | -13.416 | 1.00 |
| 2.10      | 1 . . |     |                             |        |         |         |      |
| ATOM 5615 | CB    | CB  | . ASP ASP ASP B B 299 299 . | 86.927 | 126.344 | -13.084 | 1.00 |
| 2.00      | 1 . . |     |                             |        |         |         |      |
| ATOM 5616 | CG    | CG  | . ASP ASP ASP B B 299 299 . | 87.931 | 126.678 | -14.194 | 1.00 |
| 2.00      | 1 . . |     |                             |        |         |         |      |
| ATOM 5617 | OD1   | OD1 | . ASP ASP ASP B B 299 299 . | 87.517 | 127.162 | -15.271 | 1.00 |
| 2.73      | 1 . . |     |                             |        |         |         |      |
| ATOM 5618 | OD2   | OD2 | . ASP ASP ASP B B 299 299 . | 89.169 | 126.453 | -13.921 | 1.00 |
| 4.03      | 1 . . |     |                             |        |         |         |      |
| ATOM 5619 | C     | C   | . ASP ASP ASP B B 299 299 . | 84.924 | 125.771 | -14.505 | 1.00 |
| 2.04      | 1 . . |     |                             |        |         |         |      |
| ATOM 5620 | O     | O   | . ASP ASP ASP B B 299 299 . | 85.619 | 124.830 | -15.021 | 1.00 |
| 2.78      | 1 . . |     |                             |        |         |         |      |
| ATOM 5621 | N     | N   | . TRP TRP TRP B B 300 300 . | 83.650 | 126.038 | -14.816 | 1.00 |
| 2.18      | 1 . . |     |                             |        |         |         |      |
| ATOM 5622 | CA    | CA  | . TRP TRP TRP B B 300 300 . | 82.963 | 125.281 | -15.809 | 1.00 |
| 2.65      | 1 . . |     |                             |        |         |         |      |
| ATOM 5623 | CB    | CB  | . TRP TRP TRP B B 300 300 . | 81.575 | 125.846 | -16.056 | 1.00 |
| 2.48      | 1 . . |     |                             |        |         |         |      |
| ATOM 5624 | CG    | CG  | . TRP TRP TRP B B 300 300 . | 80.658 | 125.737 | -14.884 | 1.00 |
| 2.16      | 1 . . |     |                             |        |         |         |      |
| ATOM 5625 | CD1   | CD1 | . TRP TRP TRP B B 300 300 . | 80.401 | 126.718 | -13.913 | 1.00 |
| 4.39      | 1 . . |     |                             |        |         |         |      |
| ATOM 5626 | NE1   | NE1 | . TRP TRP TRP B B 300 300 . | 79.542 | 126.237 | -13.006 | 1.00 |
| 2.84      | 1 . . |     |                             |        |         |         |      |
| ATOM 5627 | CE2   | CE2 | . TRP TRP TRP B B 300 300 . | 79.130 | 124.993 | -13.391 | 1.00 |
| 3.05      | 1 . . |     |                             |        |         |         |      |
| ATOM 5628 | CD2   | CD2 | . TRP TRP TRP B B 300 300 . | 79.839 | 124.655 | -14.567 | 1.00 |
| 3.43      | 1 . . |     |                             |        |         |         |      |
| ATOM 5629 | CE3   | CE3 | . TRP TRP TRP B B 300 300 . | 79.634 | 123.386 | -15.143 | 1.00 |
| 4.17      | 1 . . |     |                             |        |         |         |      |
| ATOM 5630 | CZ3   | CZ3 | . TRP TRP TRP B B 300 300 . | 78.695 | 122.497 | -14.507 | 1.00 |
| 3.06      | 1 . . |     |                             |        |         |         |      |
| ATOM 5631 | CH2   | CH2 | . TRP TRP TRP B B 300 300 . | 78.031 | 122.867 | -13.334 | 1.00 |
| 4.19      | 1 . . |     |                             |        |         |         |      |

|           |       |     |                             |        |         |         |      |
|-----------|-------|-----|-----------------------------|--------|---------|---------|------|
| ATOM 5632 | CZ2   | CZ2 | . TRP TRP TRP B B 300 300 . | 78.203 | 124.114 | -12.771 | 1.00 |
| 3.83      | 1 . . |     |                             |        |         |         |      |
| ATOM 5633 | C     | C   | . TRP TRP TRP B B 300 300 . | 83.689 | 125.056 | -17.128 | 1.00 |
| 2.03      | 1 . . |     |                             |        |         |         |      |
| ATOM 5634 | O     | O   | . TRP TRP TRP B B 300 300 . | 83.624 | 123.991 | -17.742 | 1.00 |
| 2.97      | 1 . . |     |                             |        |         |         |      |
| ATOM 5635 | N     | N   | . ALA ALA ALA B B 301 301 . | 84.371 | 126.111 | -17.641 | 1.00 |
| 3.67      | 1 . . |     |                             |        |         |         |      |
| ATOM 5636 | CA    | CA  | . ALA ALA ALA B B 301 301 . | 85.063 | 125.992 | -18.889 | 1.00 |
| 2.01      | 1 . . |     |                             |        |         |         |      |
| ATOM 5637 | CB    | CB  | . ALA ALA ALA B B 301 301 . | 85.721 | 127.327 | -19.205 | 1.00 |
| 2.10      | 1 . . |     |                             |        |         |         |      |
| ATOM 5638 | C     | C   | . ALA ALA ALA B B 301 301 . | 86.131 | 124.913 | -18.929 | 1.00 |
| 2.27      | 1 . . |     |                             |        |         |         |      |
| ATOM 5639 | O     | O   | . ALA ALA ALA B B 301 301 . | 86.262 | 124.209 | -19.893 | 1.00 |
| 2.04      | 1 . . |     |                             |        |         |         |      |
| ATOM 5640 | N     | N   | . ALA ALA ALA B B 302 302 . | 86.914 | 124.834 | -17.875 | 1.00 |
| 2.09      | 1 . . |     |                             |        |         |         |      |
| ATOM 5641 | CA    | CA  | . ALA ALA ALA B B 302 302 . | 87.967 | 123.879 | -17.801 | 1.00 |
| 2.11      | 1 . . |     |                             |        |         |         |      |
| ATOM 5642 | CB    | CB  | . ALA ALA ALA B B 302 302 . | 88.795 | 124.095 | -16.583 | 1.00 |
| 3.21      | 1 . . |     |                             |        |         |         |      |
| ATOM 5643 | C     | C   | . ALA ALA ALA B B 302 302 . | 87.388 | 122.495 | -17.788 | 1.00 |
| 2.28      | 1 . . |     |                             |        |         |         |      |
| ATOM 5644 | O     | O   | . ALA ALA ALA B B 302 302 . | 87.988 | 121.616 | -18.448 | 1.00 |
| 3.07      | 1 . . |     |                             |        |         |         |      |
| ATOM 5645 | N     | N   | . TRP TRP TRP B B 303 303 . | 86.280 | 122.262 | -17.077 | 1.00 |
| 2.50      | 1 . . |     |                             |        |         |         |      |
| ATOM 5646 | CA    | CA  | . TRP TRP TRP B B 303 303 . | 85.639 | 120.908 | -16.973 | 1.00 |
| 2.74      | 1 . . |     |                             |        |         |         |      |
| ATOM 5647 | CB    | CB  | . TRP TRP TRP B B 303 303 . | 84.445 | 120.907 | -16.034 | 1.00 |
| 2.10      | 1 . . |     |                             |        |         |         |      |
| ATOM 5648 | CG    | CG  | . TRP TRP TRP B B 303 303 . | 84.756 | 120.923 | -14.546 | 1.00 |
| 3.06      | 1 . . |     |                             |        |         |         |      |
| ATOM 5649 | CD1   | CD1 | . TRP TRP TRP B B 303 303 . | 85.044 | 121.994 | -13.751 | 1.00 |
| 3.71      | 1 . . |     |                             |        |         |         |      |
| ATOM 5650 | NE1   | NE1 | . TRP TRP TRP B B 303 303 . | 85.191 | 121.581 | -12.458 | 1.00 |
| 2.93      | 1 . . |     |                             |        |         |         |      |
| ATOM 5651 | CE2   | CE2 | . TRP TRP TRP B B 303 303 . | 84.952 | 120.241 | -12.367 | 1.00 |
| 3.15      | 1 . . |     |                             |        |         |         |      |
| ATOM 5652 | CD2   | CD2 | . TRP TRP TRP B B 303 303 . | 84.722 | 119.778 | -13.668 | 1.00 |
| 2.31      | 1 . . |     |                             |        |         |         |      |
| ATOM 5653 | CE3   | CE3 | . TRP TRP TRP B B 303 303 . | 84.403 | 118.443 | -13.855 | 1.00 |
| 4.16      | 1 . . |     |                             |        |         |         |      |
| ATOM 5654 | CZ3   | CZ3 | . TRP TRP TRP B B 303 303 . | 84.461 | 117.608 | -12.777 | 1.00 |
| 2.40      | 1 . . |     |                             |        |         |         |      |
| ATOM 5655 | CH2   | CH2 | . TRP TRP TRP B B 303 303 . | 84.743 | 118.084 | -11.494 | 1.00 |
| 4.27      | 1 . . |     |                             |        |         |         |      |
| ATOM 5656 | CZ2   | CZ2 | . TRP TRP TRP B B 303 303 . | 84.984 | 119.389 | -11.259 | 1.00 |
| 2.30      | 1 . . |     |                             |        |         |         |      |
| ATOM 5657 | C     | C   | . TRP TRP TRP B B 303 303 . | 85.197 | 120.413 | -18.343 | 1.00 |
| 2.96      | 1 . . |     |                             |        |         |         |      |
| ATOM 5658 | O     | O   | . TRP TRP TRP B B 303 303 . | 85.516 | 119.309 | -18.742 | 1.00 |
| 3.47      | 1 . . |     |                             |        |         |         |      |

|           |     |       |               |     |         |          |         |         |      |
|-----------|-----|-------|---------------|-----|---------|----------|---------|---------|------|
| ATOM 5659 | N   | N     | . SER SER SER | B B | 304 304 | . 84.485 | 121.271 | -19.059 | 1.00 |
| 2.00      | 1   | . . . |               |     |         |          |         |         |      |
| ATOM 5660 | CA  | CA    | . SER SER SER | B B | 304 304 | . 83.897 | 120.903 | -20.310 | 1.00 |
| 2.57      | 1   | . . . |               |     |         |          |         |         |      |
| ATOM 5661 | CB  | CB    | . SER SER SER | B B | 304 304 | . 82.918 | 122.034 | -20.768 | 1.00 |
| 2.53      | 1   | . . . |               |     |         |          |         |         |      |
| ATOM 5662 | OG  | OG    | . SER SER SER | B B | 304 304 | . 81.785 | 122.069 | -19.921 | 1.00 |
| 2.37      | 1   | . . . |               |     |         |          |         |         |      |
| ATOM 5663 | C   | C     | . SER SER SER | B B | 304 304 | . 84.990 | 120.670 | -21.356 | 1.00 |
| 3.01      | 1   | . . . |               |     |         |          |         |         |      |
| ATOM 5664 | O   | O     | . SER SER SER | B B | 304 304 | . 84.858 | 119.715 | -22.148 | 1.00 |
| 4.01      | 1   | . . . |               |     |         |          |         |         |      |
| ATOM 5665 | N   | N     | . LYS LYS LYS | B B | 305 305 | . 86.045 | 121.489 | -21.349 | 1.00 |
| 2.52      | 1   | . . . |               |     |         |          |         |         |      |
| ATOM 5666 | CA  | CA    | . LYS LYS LYS | B B | 305 305 | . 87.192 | 121.315 | -22.278 | 1.00 |
| 5.91      | 1   | . . . |               |     |         |          |         |         |      |
| ATOM 5667 | CB  | CB    | . LYS LYS LYS | B B | 305 305 | . 88.153 | 122.514 | -22.187 | 1.00 |
| 6.99      | 1   | . . . |               |     |         |          |         |         |      |
| ATOM 5668 | CG  | CG    | . LYS LYS LYS | B B | 305 305 | . 89.297 | 122.584 | -23.164 | 1.00 |
| 11.79     | 1   | . . . |               |     |         |          |         |         |      |
| ATOM 5669 | CD  | CD    | . LYS LYS LYS | B B | 305 305 | . 89.985 | 123.962 | -23.087 | 1.00 |
| 18.63     | 1   | . . . |               |     |         |          |         |         |      |
| ATOM 5670 | CE  | CE    | . LYS LYS LYS | B B | 305 305 | . 90.841 | 124.292 | -24.300 | 1.00 |
| 20.30     | 1   | . . . |               |     |         |          |         |         |      |
| ATOM 5671 | NZ  | NZ    | . LYS LYS LYS | B B | 305 305 | . 91.692 | 125.442 | -23.965 | 1.00 |
| 21.87     | 1   | . . . |               |     |         |          |         |         |      |
| ATOM 5672 | C   | C     | . LYS LYS LYS | B B | 305 305 | . 87.937 | 119.991 | -22.068 | 1.00 |
| 5.30      | 1   | . . . |               |     |         |          |         |         |      |
| ATOM 5673 | O   | O     | . LYS LYS LYS | B B | 305 305 | . 88.193 | 119.234 | -22.981 | 1.00 |
| 5.00      | 1   | . . . |               |     |         |          |         |         |      |
| ATOM 5674 | N   | N     | . PHE PHE PHE | B B | 306 306 | . 88.233 | 119.755 | -20.804 | 1.00 |
| 4.29      | 1   | . . . |               |     |         |          |         |         |      |
| ATOM 5675 | CA  | CA    | . PHE PHE PHE | B B | 306 306 | . 89.006 | 118.573 | -20.409 | 1.00 |
| 3.59      | 1   | . . . |               |     |         |          |         |         |      |
| ATOM 5676 | CB  | CB    | . PHE PHE PHE | B B | 306 306 | . 89.333 | 118.604 | -18.923 | 1.00 |
| 3.66      | 1   | . . . |               |     |         |          |         |         |      |
| ATOM 5677 | CG  | CG    | . PHE PHE PHE | B B | 306 306 | . 90.264 | 117.483 | -18.540 | 1.00 |
| 3.46      | 1   | . . . |               |     |         |          |         |         |      |
| ATOM 5678 | CD1 | CD1   | . PHE PHE PHE | B B | 306 306 | . 91.565 | 117.387 | -19.114 | 1.00 |
| 6.19      | 1   | . . . |               |     |         |          |         |         |      |
| ATOM 5679 | CE1 | CE1   | . PHE PHE PHE | B B | 306 306 | . 92.441 | 116.303 | -18.773 | 1.00 |
| 8.06      | 1   | . . . |               |     |         |          |         |         |      |
| ATOM 5680 | CZ  | CZ    | . PHE PHE PHE | B B | 306 306 | . 92.000 | 115.365 | -17.878 | 1.00 |
| 6.28      | 1   | . . . |               |     |         |          |         |         |      |
| ATOM 5681 | CE2 | CE2   | . PHE PHE PHE | B B | 306 306 | . 90.711 | 115.454 | -17.366 | 1.00 |
| 5.45      | 1   | . . . |               |     |         |          |         |         |      |
| ATOM 5682 | CD2 | CD2   | . PHE PHE PHE | B B | 306 306 | . 89.858 | 116.534 | -17.712 | 1.00 |
| 4.12      | 1   | . . . |               |     |         |          |         |         |      |
| ATOM 5683 | C   | C     | . PHE PHE PHE | B B | 306 306 | . 88.241 | 117.309 | -20.749 | 1.00 |
| 2.93      | 1   | . . . |               |     |         |          |         |         |      |
| ATOM 5684 | O   | O     | . PHE PHE PHE | B B | 306 306 | . 88.759 | 116.396 | -21.429 | 1.00 |
| 4.10      | 1   | . . . |               |     |         |          |         |         |      |
| ATOM 5685 | N   | N     | . THR THR THR | B B | 307 307 | . 86.968 | 117.311 | -20.442 | 1.00 |
| 2.29      | 1   | . . . |               |     |         |          |         |         |      |

|           |       |     |                             |        |         |         |      |
|-----------|-------|-----|-----------------------------|--------|---------|---------|------|
| ATOM 5686 | CA    | CA  | . THR THR THR B B 307 307 . | 86.106 | 116.138 | -20.564 | 1.00 |
| 3.00      | 1 . . |     |                             |        |         |         |      |
| ATOM 5687 | CB    | CB  | . THR THR THR B B 307 307 . | 84.705 | 116.391 | -19.962 | 1.00 |
| 2.66      | 1 . . |     |                             |        |         |         |      |
| ATOM 5688 | OG1   | OG1 | . THR THR THR B B 307 307 . | 84.868 | 116.400 | -18.556 | 1.00 |
| 2.16      | 1 . . |     |                             |        |         |         |      |
| ATOM 5689 | CG2   | CG2 | . THR THR THR B B 307 307 . | 83.787 | 115.239 | -20.237 | 1.00 |
| 3.78      | 1 . . |     |                             |        |         |         |      |
| ATOM 5690 | C     | C   | . THR THR THR B B 307 307 . | 85.996 | 115.794 | -22.023 | 1.00 |
| 3.87      | 1 . . |     |                             |        |         |         |      |
| ATOM 5691 | O     | O   | . THR THR THR B B 307 307 . | 86.021 | 114.616 | -22.375 | 1.00 |
| 4.71      | 1 . . |     |                             |        |         |         |      |
| ATOM 5692 | N     | N   | . ALA ALA ALA B B 308 308 . | 85.929 | 116.828 | -22.876 | 1.00 |
| 3.36      | 1 . . |     |                             |        |         |         |      |
| ATOM 5693 | CA    | CA  | . ALA ALA ALA B B 308 308 . | 85.775 | 116.569 | -24.296 | 1.00 |
| 3.59      | 1 . . |     |                             |        |         |         |      |
| ATOM 5694 | CB    | CB  | . ALA ALA ALA B B 308 308 . | 85.377 | 117.879 | -24.998 | 1.00 |
| 3.17      | 1 . . |     |                             |        |         |         |      |
| ATOM 5695 | C     | C   | . ALA ALA ALA B B 308 308 . | 87.006 | 116.037 | -24.978 | 1.00 |
| 3.76      | 1 . . |     |                             |        |         |         |      |
| ATOM 5696 | O     | O   | . ALA ALA ALA B B 308 308 . | 86.867 | 115.557 | -26.142 | 1.00 |
| 5.62      | 1 . . |     |                             |        |         |         |      |
| ATOM 5697 | N     | N   | . ASN ASN ASN B B 309 309 . | 88.151 | 116.159 | -24.324 | 1.00 |
| 3.40      | 1 . . |     |                             |        |         |         |      |
| ATOM 5698 | CA    | CA  | . ASN ASN ASN B B 309 309 . | 89.504 | 115.769 | -24.819 | 1.00 |
| 4.00      | 1 . . |     |                             |        |         |         |      |
| ATOM 5699 | CB    | CB  | . ASN ASN ASN B B 309 309 . | 90.438 | 116.987 | -24.561 | 1.00 |
| 5.78      | 1 . . |     |                             |        |         |         |      |
| ATOM 5700 | CG    | CG  | . ASN ASN ASN B B 309 309 . | 90.230 | 118.083 | -25.550 | 1.00 |
| 10.63     | 1 . . |     |                             |        |         |         |      |
| ATOM 5701 | OD1   | OD1 | . ASN ASN ASN B B 309 309 . | 89.617 | 117.890 | -26.602 | 1.00 |
| 17.99     | 1 . . |     |                             |        |         |         |      |
| ATOM 5702 | ND2   | ND2 | . ASN ASN ASN B B 309 309 . | 90.688 | 119.303 | -25.182 | 1.00 |
| 18.58     | 1 . . |     |                             |        |         |         |      |
| ATOM 5703 | C     | C   | . ASN ASN ASN B B 309 309 . | 90.106 | 114.492 | -24.203 | 1.00 |
| 3.86      | 1 . . |     |                             |        |         |         |      |
| ATOM 5704 | O     | O   | . ASN ASN ASN B B 309 309 . | 91.310 | 114.230 | -24.320 | 1.00 |
| 5.58      | 1 . . |     |                             |        |         |         |      |
| ATOM 5705 | N     | N   | . VAL VAL VAL B B 310 310 . | 89.284 | 113.723 | -23.500 | 1.00 |
| 3.29      | 1 . . |     |                             |        |         |         |      |
| ATOM 5706 | CA    | CA  | . VAL VAL VAL B B 310 310 . | 89.706 | 112.494 | -22.824 | 1.00 |
| 3.88      | 1 . . |     |                             |        |         |         |      |
| ATOM 5707 | CB    | CB  | . VAL VAL VAL B B 310 310 . | 90.018 | 112.762 | -21.315 | 1.00 |
| 3.34      | 1 . . |     |                             |        |         |         |      |
| ATOM 5708 | CG1   | CG1 | . VAL VAL VAL B B 310 310 . | 91.147 | 113.739 | -21.161 | 1.00 |
| 4.30      | 1 . . |     |                             |        |         |         |      |
| ATOM 5709 | CG2   | CG2 | . VAL VAL VAL B B 310 310 . | 88.753 | 113.072 | -20.453 | 1.00 |
| 3.96      | 1 . . |     |                             |        |         |         |      |
| ATOM 5710 | C     | C   | . VAL VAL VAL B B 310 310 . | 88.655 | 111.428 | -22.924 | 1.00 |
| 2.39      | 1 . . |     |                             |        |         |         |      |
| ATOM 5711 | O     | O   | . VAL VAL VAL B B 310 310 . | 87.432 | 111.711 | -23.115 | 1.00 |
| 2.94      | 1 . . |     |                             |        |         |         |      |
| ATOM 5712 | N     | N   | . GLY GLY GLY B B 311 311 . | 89.071 | 110.207 | -22.677 | 1.00 |
| 2.08      | 1 . . |     |                             |        |         |         |      |





|           |     |       |               |     |         |          |         |         |      |
|-----------|-----|-------|---------------|-----|---------|----------|---------|---------|------|
| ATOM 5740 | O   | O     | . ILE ILE ILE | B B | 314 314 | . 83.270 | 112.731 | -14.382 | 1.00 |
| 2.61      | 1   | . . . |               |     |         |          |         |         |      |
| ATOM 5741 | N   | N     | . VAL VAL VAL | B B | 315 315 | . 84.759 | 112.787 | -12.705 | 1.00 |
| 2.22      | 1   | . . . |               |     |         |          |         |         |      |
| ATOM 5742 | CA  | CA    | . VAL VAL VAL | B B | 315 315 | . 83.748 | 112.723 | -11.662 | 1.00 |
| 2.12      | 1   | . . . |               |     |         |          |         |         |      |
| ATOM 5743 | CB  | CB    | . VAL VAL VAL | B B | 315 315 | . 84.079 | 111.713 | -10.528 | 1.00 |
| 2.48      | 1   | . . . |               |     |         |          |         |         |      |
| ATOM 5744 | CG1 | CG1   | . VAL VAL VAL | B B | 315 315 | . 82.881 | 111.523 | -9.590  | 1.00 |
| 3.06      | 1   | . . . |               |     |         |          |         |         |      |
| ATOM 5745 | CG2 | CG2   | . VAL VAL VAL | B B | 315 315 | . 84.503 | 110.383 | -11.103 | 1.00 |
| 2.00      | 1   | . . . |               |     |         |          |         |         |      |
| ATOM 5746 | C   | C     | . VAL VAL VAL | B B | 315 315 | . 83.524 | 114.097 | -11.039 | 1.00 |
| 2.45      | 1   | . . . |               |     |         |          |         |         |      |
| ATOM 5747 | O   | O     | . VAL VAL VAL | B B | 315 315 | . 84.440 | 114.715 | -10.614 | 1.00 |
| 2.65      | 1   | . . . |               |     |         |          |         |         |      |
| ATOM 5748 | N   | N     | . GLY GLY GLY | B B | 316 316 | . 82.279 | 114.526 | -11.051 | 1.00 |
| 2.07      | 1   | . . . |               |     |         |          |         |         |      |
| ATOM 5749 | CA  | CA    | . GLY GLY GLY | B B | 316 316 | . 81.891 | 115.728 | -10.375 | 1.00 |
| 2.00      | 1   | . . . |               |     |         |          |         |         |      |
| ATOM 5750 | C   | C     | . GLY GLY GLY | B B | 316 316 | . 81.645 | 115.338 | -8.895  | 1.00 |
| 2.25      | 1   | . . . |               |     |         |          |         |         |      |
| ATOM 5751 | O   | O     | . GLY GLY GLY | B B | 316 316 | . 80.852 | 114.402 | -8.569  | 1.00 |
| 2.69      | 1   | . . . |               |     |         |          |         |         |      |
| ATOM 5752 | N   | N     | . ASP ASP ASP | B B | 317 317 | . 82.235 | 116.151 | -8.054  | 1.00 |
| 2.21      | 1   | . . . |               |     |         |          |         |         |      |
| ATOM 5753 | CA  | CA    | . ASP ASP ASP | B B | 317 317 | . 81.998 | 116.068 | -6.603  | 1.00 |
| 2.76      | 1   | . . . |               |     |         |          |         |         |      |
| ATOM 5754 | CB  | CB    | . ASP ASP ASP | B B | 317 317 | . 83.262 | 115.556 | -5.907  | 1.00 |
| 2.34      | 1   | . . . |               |     |         |          |         |         |      |
| ATOM 5755 | CG  | CG    | . ASP ASP ASP | B B | 317 317 | . 83.139 | 115.586 | -4.371  | 1.00 |
| 3.49      | 1   | . . . |               |     |         |          |         |         |      |
| ATOM 5756 | OD1 | OD1   | . ASP ASP ASP | B B | 317 317 | . 84.203 | 115.457 | -3.645  | 1.00 |
| 2.26      | 1   | . . . |               |     |         |          |         |         |      |
| ATOM 5757 | OD2 | OD2   | . ASP ASP ASP | B B | 317 317 | . 81.979 | 115.618 | -3.909  | 1.00 |
| 2.01      | 1   | . . . |               |     |         |          |         |         |      |
| ATOM 5758 | C   | C     | . ASP ASP ASP | B B | 317 317 | . 81.569 | 117.481 | -6.071  | 1.00 |
| 2.00      | 1   | . . . |               |     |         |          |         |         |      |
| ATOM 5759 | O   | O     | . ASP ASP ASP | B B | 317 317 | . 80.400 | 117.765 | -5.873  | 1.00 |
| 3.29      | 1   | . . . |               |     |         |          |         |         |      |
| ATOM 5760 | N   | N     | . ASP ASP ASP | B B | 318 318 | . 82.538 | 118.341 | -5.784  | 1.00 |
| 2.04      | 1   | . . . |               |     |         |          |         |         |      |
| ATOM 5761 | CA  | CA    | . ASP ASP ASP | B B | 318 318 | . 82.217 | 119.712 | -5.453  | 1.00 |
| 2.46      | 1   | . . . |               |     |         |          |         |         |      |
| ATOM 5762 | CB  | CB    | . ASP ASP ASP | B B | 318 318 | . 83.433 | 120.454 | -4.933  | 1.00 |
| 2.68      | 1   | . . . |               |     |         |          |         |         |      |
| ATOM 5763 | CG  | CG    | . ASP ASP ASP | B B | 318 318 | . 83.967 | 119.883 | -3.633  | 1.00 |
| 3.05      | 1   | . . . |               |     |         |          |         |         |      |
| ATOM 5764 | OD1 | OD1   | . ASP ASP ASP | B B | 318 318 | . 83.181 | 119.238 | -2.848  | 1.00 |
| 4.97      | 1   | . . . |               |     |         |          |         |         |      |
| ATOM 5765 | OD2 | OD2   | . ASP ASP ASP | B B | 318 318 | . 85.190 | 120.067 | -3.445  | 1.00 |
| 3.36      | 1   | . . . |               |     |         |          |         |         |      |
| ATOM 5766 | C   | C     | . ASP ASP ASP | B B | 318 318 | . 81.510 | 120.426 | -6.593  | 1.00 |
| 2.53      | 1   | . . . |               |     |         |          |         |         |      |

|           |       |     |                                                         |
|-----------|-------|-----|---------------------------------------------------------|
| ATOM 5767 | O     | O   | . ASP ASP ASP B B 318 318 . 80.695 121.350 -6.325 1.00  |
| 2.46      | 1 . . |     |                                                         |
| ATOM 5768 | N     | N   | . LEU LEU LEU B B 319 319 . 81.776 120.010 -7.844 1.00  |
| 2.58      | 1 . . |     |                                                         |
| ATOM 5769 | CA    | CA  | . LEU LEU LEU B B 319 319 . 80.992 120.622 -8.942 1.00  |
| 2.06      | 1 . . |     |                                                         |
| ATOM 5770 | CB    | CB  | . LEU LEU LEU B B 319 319 . 81.450 119.956 -10.257 1.00 |
| 2.88      | 1 . . |     |                                                         |
| ATOM 5771 | CG    | CG  | . LEU LEU LEU B B 319 319 . 80.833 120.541 -11.526 1.00 |
| 3.11      | 1 . . |     |                                                         |
| ATOM 5772 | CD1   | CD1 | . LEU LEU LEU B B 319 319 . 81.391 121.948 -11.864 1.00 |
| 3.07      | 1 . . |     |                                                         |
| ATOM 5773 | CD2   | CD2 | . LEU LEU LEU B B 319 319 . 81.169 119.605 -12.723 1.00 |
| 2.56      | 1 . . |     |                                                         |
| ATOM 5774 | C     | C   | . LEU LEU LEU B B 319 319 . 79.507 120.444 -8.825 1.00  |
| 2.18      | 1 . . |     |                                                         |
| ATOM 5775 | O     | O   | . LEU LEU LEU B B 319 319 . 78.718 121.354 -9.052 1.00  |
| 2.81      | 1 . . |     |                                                         |
| ATOM 5776 | N     | N   | . THR THR THR B B 320 320 . 79.080 119.229 -8.415 1.00  |
| 2.00      | 1 . . |     |                                                         |
| ATOM 5777 | CA    | CA  | . THR THR THR B B 320 320 . 77.689 118.744 -8.521 1.00  |
| 2.59      | 1 . . |     |                                                         |
| ATOM 5778 | CB    | CB  | . THR THR THR B B 320 320 . 77.631 117.397 -9.240 1.00  |
| 2.44      | 1 . . |     |                                                         |
| ATOM 5779 | OG1   | OG1 | . THR THR THR B B 320 320 . 78.738 116.598 -8.819 1.00  |
| 3.09      | 1 . . |     |                                                         |
| ATOM 5780 | CG2   | CG2 | . THR THR THR B B 320 320 . 77.731 117.681 -10.801 1.00 |
| 4.95      | 1 . . |     |                                                         |
| ATOM 5781 | C     | C   | . THR THR THR B B 320 320 . 76.932 118.688 -7.227 1.00  |
| 2.00      | 1 . . |     |                                                         |
| ATOM 5782 | O     | O   | . THR THR THR B B 320 320 . 75.677 118.822 -7.238 1.00  |
| 2.59      | 1 . . |     |                                                         |
| ATOM 5783 | N     | N   | . VAL VAL VAL B B 321 321 . 77.715 118.572 -6.129 1.00  |
| 3.33      | 1 . . |     |                                                         |
| ATOM 5784 | CA    | CA  | . VAL VAL VAL B B 321 321 . 77.178 118.427 -4.723 1.00  |
| 2.92      | 1 . . |     |                                                         |
| ATOM 5785 | CB    | CB  | . VAL VAL VAL B B 321 321 . 77.120 119.763 -3.991 1.00  |
| 2.62      | 1 . . |     |                                                         |
| ATOM 5786 | CG1   | CG1 | . VAL VAL VAL B B 321 321 . 78.562 120.310 -3.865 1.00  |
| 2.62      | 1 . . |     |                                                         |
| ATOM 5787 | CG2   | CG2 | . VAL VAL VAL B B 321 321 . 76.182 120.698 -4.782 1.00  |
| 5.51      | 1 . . |     |                                                         |
| ATOM 5788 | C     | C   | . VAL VAL VAL B B 321 321 . 75.868 117.643 -4.615 1.00  |
| 2.38      | 1 . . |     |                                                         |
| ATOM 5789 | O     | O   | . VAL VAL VAL B B 321 321 . 74.909 118.018 -3.931 1.00  |
| 4.27      | 1 . . |     |                                                         |
| ATOM 5790 | N     | N   | . THR THR THR B B 322 322 . 75.805 116.515 -5.317 1.00  |
| 2.24      | 1 . . |     |                                                         |
| ATOM 5791 | CA    | CA  | . THR THR THR B B 322 322 . 74.656 115.613 -5.304 1.00  |
| 2.43      | 1 . . |     |                                                         |
| ATOM 5792 | CB    | CB  | . THR THR THR B B 322 322 . 74.702 114.763 -3.976 1.00  |
| 3.47      | 1 . . |     |                                                         |
| ATOM 5793 | OG1   | OG1 | . THR THR THR B B 322 322 . 76.016 114.258 -3.920 1.00  |
| 2.81      | 1 . . |     |                                                         |

|           |       |     |                             |        |         |         |      |
|-----------|-------|-----|-----------------------------|--------|---------|---------|------|
| ATOM 5794 | CG2   | CG2 | . THR THR THR B B 322 322 . | 73.779 | 113.577 | -4.001  | 1.00 |
| 4.13      | 1 . . |     |                             |        |         |         |      |
| ATOM 5795 | C     | C   | . THR THR THR B B 322 322 . | 73.364 | 116.381 | -5.480  | 1.00 |
| 2.95      | 1 . . |     |                             |        |         |         |      |
| ATOM 5796 | O     | O   | . THR THR THR B B 322 322 . | 72.330 | 116.097 | -4.857  | 1.00 |
| 3.23      | 1 . . |     |                             |        |         |         |      |
| ATOM 5797 | N     | N   | . ASN ASN ASN B B 323 323 . | 73.409 | 117.422 | -6.333  | 1.00 |
| 2.59      | 1 . . |     |                             |        |         |         |      |
| ATOM 5798 | CA    | CA  | . ASN ASN ASN B B 323 323 . | 72.264 | 118.340 | -6.334  | 1.00 |
| 4.80      | 1 . . |     |                             |        |         |         |      |
| ATOM 5799 | CB    | CB  | . ASN ASN ASN B B 323 323 . | 72.774 | 119.720 | -5.911  | 1.00 |
| 5.86      | 1 . . |     |                             |        |         |         |      |
| ATOM 5800 | CG    | CG  | . ASN ASN ASN B B 323 323 . | 71.717 | 120.714 | -5.858  | 1.00 |
| 8.22      | 1 . . |     |                             |        |         |         |      |
| ATOM 5801 | OD1   | OD1 | . ASN ASN ASN B B 323 323 . | 70.747 | 120.635 | -6.662  | 1.00 |
| 10.74     | 1 . . |     |                             |        |         |         |      |
| ATOM 5802 | ND2   | ND2 | . ASN ASN ASN B B 323 323 . | 71.841 | 121.669 | -4.934  | 1.00 |
| 8.19      | 1 . . |     |                             |        |         |         |      |
| ATOM 5803 | C     | C   | . ASN ASN ASN B B 323 323 . | 71.682 | 118.425 | -7.730  | 1.00 |
| 4.39      | 1 . . |     |                             |        |         |         |      |
| ATOM 5804 | O     | O   | . ASN ASN ASN B B 323 323 . | 72.389 | 118.803 | -8.646  | 1.00 |
| 6.23      | 1 . . |     |                             |        |         |         |      |
| ATOM 5805 | N     | N   | . PRO PRO PRO B B 324 324 . | 70.465 | 117.980 | -7.916  | 1.00 |
| 4.98      | 1 . . |     |                             |        |         |         |      |
| ATOM 5806 | CA    | CA  | . PRO PRO PRO B B 324 324 . | 69.837 | 117.965 | -9.272  | 1.00 |
| 4.74      | 1 . . |     |                             |        |         |         |      |
| ATOM 5807 | CB    | CB  | . PRO PRO PRO B B 324 324 . | 68.389 | 117.621 | -8.962  | 1.00 |
| 6.02      | 1 . . |     |                             |        |         |         |      |
| ATOM 5808 | CG    | CG  | . PRO PRO PRO B B 324 324 . | 68.499 | 116.731 | -7.714  | 1.00 |
| 4.43      | 1 . . |     |                             |        |         |         |      |
| ATOM 5809 | CD    | CD  | . PRO PRO PRO B B 324 324 . | 69.615 | 117.317 | -6.915  | 1.00 |
| 5.94      | 1 . . |     |                             |        |         |         |      |
| ATOM 5810 | C     | C   | . PRO PRO PRO B B 324 324 . | 69.948 | 119.281 | -10.091 | 1.00 |
| 6.60      | 1 . . |     |                             |        |         |         |      |
| ATOM 5811 | O     | O   | . PRO PRO PRO B B 324 324 . | 70.160 | 119.232 | -11.359 | 1.00 |
| 8.09      | 1 . . |     |                             |        |         |         |      |
| ATOM 5812 | N     | N   | . LYS LYS LYS B B 325 325 . | 69.819 | 120.424 | -9.412  | 1.00 |
| 6.52      | 1 . . |     |                             |        |         |         |      |
| ATOM 5813 | CA    | CA  | . LYS LYS LYS B B 325 325 . | 70.026 | 121.709 | -10.102 | 1.00 |
| 7.23      | 1 . . |     |                             |        |         |         |      |
| ATOM 5814 | CB    | CB  | . LYS LYS LYS B B 325 325 . | 69.735 | 122.884 | -9.183  | 1.00 |
| 8.47      | 1 . . |     |                             |        |         |         |      |
| ATOM 5815 | CG    | CG  | . LYS LYS LYS B B 325 325 . | 68.345 | 122.756 | -8.610  | 1.00 |
| 11.96     | 1 . . |     |                             |        |         |         |      |
| ATOM 5816 | CD    | CD  | . LYS LYS LYS B B 325 325 . | 67.996 | 123.851 | -7.573  | 1.00 |
| 20.31     | 1 . . |     |                             |        |         |         |      |
| ATOM 5817 | CE    | CE  | . LYS LYS LYS B B 325 325 . | 66.510 | 123.712 | -7.155  | 1.00 |
| 23.24     | 1 . . |     |                             |        |         |         |      |
| ATOM 5818 | NZ    | NZ  | . LYS LYS LYS B B 325 325 . | 65.868 | 125.018 | -6.855  | 1.00 |
| 24.41     | 1 . . |     |                             |        |         |         |      |
| ATOM 5819 | C     | C   | . LYS LYS LYS B B 325 325 . | 71.402 | 121.863 | -10.752 | 1.00 |
| 6.80      | 1 . . |     |                             |        |         |         |      |
| ATOM 5820 | O     | O   | . LYS LYS LYS B B 325 325 . | 71.492 | 122.304 | -11.913 | 1.00 |
| 8.98      | 1 . . |     |                             |        |         |         |      |

|           |       |     |                             |        |         |         |      |
|-----------|-------|-----|-----------------------------|--------|---------|---------|------|
| ATOM 5821 | N     | N   | . ARG ARG ARG B B 326 326 . | 72.456 | 121.485 | -10.035 | 1.00 |
| 4.69      | 1 . . |     |                             |        |         |         |      |
| ATOM 5822 | CA    | CA  | . ARG ARG ARG B B 326 326 . | 73.820 | 121.609 | -10.569 | 1.00 |
| 2.94      | 1 . . |     |                             |        |         |         |      |
| ATOM 5823 | CB    | CB  | . ARG ARG ARG B B 326 326 . | 74.888 | 121.504 | -9.459  | 1.00 |
| 4.95      | 1 . . |     |                             |        |         |         |      |
| ATOM 5824 | CG    | CG  | . ARG ARG ARG B B 326 326 . | 74.633 | 122.398 | -8.264  | 1.00 |
| 5.51      | 1 . . |     |                             |        |         |         |      |
| ATOM 5825 | CD    | CD  | . ARG ARG ARG B B 326 326 . | 75.454 | 123.623 | -8.292  | 1.00 |
| 6.89      | 1 . . |     |                             |        |         |         |      |
| ATOM 5826 | NE    | NE  | . ARG ARG ARG B B 326 326 . | 76.879 | 123.431 | -8.581  | 1.00 |
| 6.04      | 1 . . |     |                             |        |         |         |      |
| ATOM 5827 | CZ    | CZ  | . ARG ARG ARG B B 326 326 . | 77.661 | 124.450 | -8.974  | 1.00 |
| 4.85      | 1 . . |     |                             |        |         |         |      |
| ATOM 5828 | NH1   | NH1 | . ARG ARG ARG B B 326 326 . | 77.184 | 125.703 | -9.051  | 1.00 |
| 4.32      | 1 . . |     |                             |        |         |         |      |
| ATOM 5829 | NH2   | NH2 | . ARG ARG ARG B B 326 326 . | 78.919 | 124.227 | -9.293  | 1.00 |
| 2.62      | 1 . . |     |                             |        |         |         |      |
| ATOM 5830 | C     | C   | . ARG ARG ARG B B 326 326 . | 74.125 | 120.499 | -11.567 | 1.00 |
| 4.61      | 1 . . |     |                             |        |         |         |      |
| ATOM 5831 | O     | O   | . ARG ARG ARG B B 326 326 . | 74.887 | 120.691 | -12.492 | 1.00 |
| 4.36      | 1 . . |     |                             |        |         |         |      |
| ATOM 5832 | N     | N   | . ILE ILE ILE B B 327 327 . | 73.667 | 119.297 | -11.259 | 1.00 |
| 3.92      | 1 . . |     |                             |        |         |         |      |
| ATOM 5833 | CA    | CA  | . ILE ILE ILE B B 327 327 . | 73.758 | 118.216 | -12.222 | 1.00 |
| 2.90      | 1 . . |     |                             |        |         |         |      |
| ATOM 5834 | CB    | CB  | . ILE ILE ILE B B 327 327 . | 73.160 | 116.926 | -11.624 | 1.00 |
| 3.93      | 1 . . |     |                             |        |         |         |      |
| ATOM 5835 | CG1   | CG1 | . ILE ILE ILE B B 327 327 . | 73.995 | 116.515 | -10.390 | 1.00 |
| 2.40      | 1 . . |     |                             |        |         |         |      |
| ATOM 5836 | CD1   | CD1 | . ILE ILE ILE B B 327 327 . | 73.224 | 115.527 | -9.413  | 1.00 |
| 4.87      | 1 . . |     |                             |        |         |         |      |
| ATOM 5837 | CG2   | CG2 | . ILE ILE ILE B B 327 327 . | 72.988 | 115.813 | -12.729 | 1.00 |
| 4.67      | 1 . . |     |                             |        |         |         |      |
| ATOM 5838 | C     | C   | . ILE ILE ILE B B 327 327 . | 73.146 | 118.548 | -13.585 | 1.00 |
| 4.36      | 1 . . |     |                             |        |         |         |      |
| ATOM 5839 | O     | O   | . ILE ILE ILE B B 327 327 . | 73.783 | 118.210 | -14.582 | 1.00 |
| 2.48      | 1 . . |     |                             |        |         |         |      |
| ATOM 5840 | N     | N   | . GLU GLU GLU B B 328 328 . | 71.956 | 119.124 | -13.621 | 1.00 |
| 4.82      | 1 . . |     |                             |        |         |         |      |
| ATOM 5841 | CA    | CA  | . GLU GLU GLU B B 328 328 . | 71.365 | 119.631 | -14.886 | 1.00 |
| 5.73      | 1 . . |     |                             |        |         |         |      |
| ATOM 5842 | CB    | CB  | . GLU GLU GLU B B 328 328 . | 70.060 | 120.362 | -14.614 | 1.00 |
| 6.53      | 1 . . |     |                             |        |         |         |      |
| ATOM 5843 | CG    | CG  | . GLU GLU GLU B B 328 328 . | 68.888 | 119.404 | -14.198 | 1.00 |
| 12.02     | 1 . . |     |                             |        |         |         |      |
| ATOM 5844 | CD    | CD  | . GLU GLU GLU B B 328 328 . | 68.235 | 118.659 | -15.381 | 1.00 |
| 20.11     | 1 . . |     |                             |        |         |         |      |
| ATOM 5845 | OE1   | OE1 | . GLU GLU GLU B B 328 328 . | 68.747 | 118.800 | -16.529 | 1.00 |
| 23.16     | 1 . . |     |                             |        |         |         |      |
| ATOM 5846 | OE2   | OE2 | . GLU GLU GLU B B 328 328 . | 67.204 | 117.949 | -15.172 | 1.00 |
| 21.67     | 1 . . |     |                             |        |         |         |      |
| ATOM 5847 | C     | C   | . GLU GLU GLU B B 328 328 . | 72.300 | 120.500 | -15.689 | 1.00 |
| 5.31      | 1 . . |     |                             |        |         |         |      |



|           |       |     |                             |        |         |         |      |
|-----------|-------|-----|-----------------------------|--------|---------|---------|------|
| ATOM 5875 | CG    | CG  | . GLU GLU GLU B B 332 332 . | 72.506 | 122.678 | -21.152 | 1.00 |
| 13.21     | 1 . . |     |                             |        |         |         |      |
| ATOM 5876 | CD    | CD  | . GLU GLU GLU B B 332 332 . | 73.479 | 123.349 | -22.092 | 1.00 |
| 20.00     | 1 . . |     |                             |        |         |         |      |
| ATOM 5877 | OE1   | OE1 | . GLU GLU GLU B B 332 332 . | 74.529 | 123.888 | -21.638 | 1.00 |
| 21.71     | 1 . . |     |                             |        |         |         |      |
| ATOM 5878 | OE2   | OE2 | . GLU GLU GLU B B 332 332 . | 73.147 | 123.382 | -23.294 | 1.00 |
| 24.62     | 1 . . |     |                             |        |         |         |      |
| ATOM 5879 | C     | C   | . GLU GLU GLU B B 332 332 . | 75.278 | 120.969 | -20.952 | 1.00 |
| 4.83      | 1 . . |     |                             |        |         |         |      |
| ATOM 5880 | O     | O   | . GLU GLU GLU B B 332 332 . | 75.506 | 120.952 | -22.173 | 1.00 |
| 7.92      | 1 . . |     |                             |        |         |         |      |
| ATOM 5881 | N     | N   | . GLU GLU GLU B B 333 333 . | 76.237 | 121.339 | -20.080 | 1.00 |
| 3.75      | 1 . . |     |                             |        |         |         |      |
| ATOM 5882 | CA    | CA  | . GLU GLU GLU B B 333 333 . | 77.549 | 121.765 | -20.466 | 1.00 |
| 3.15      | 1 . . |     |                             |        |         |         |      |
| ATOM 5883 | CB    | CB  | . GLU GLU GLU B B 333 333 . | 78.104 | 122.739 | -19.454 | 1.00 |
| 3.11      | 1 . . |     |                             |        |         |         |      |
| ATOM 5884 | CG    | CG  | . GLU GLU GLU B B 333 333 . | 77.111 | 123.926 | -19.304 | 1.00 |
| 6.08      | 1 . . |     |                             |        |         |         |      |
| ATOM 5885 | CD    | CD  | . GLU GLU GLU B B 333 333 . | 77.665 | 125.099 | -18.545 | 1.00 |
| 6.32      | 1 . . |     |                             |        |         |         |      |
| ATOM 5886 | OE1   | OE1 | . GLU GLU GLU B B 333 333 . | 76.780 | 125.831 | -17.998 | 1.00 |
| 5.76      | 1 . . |     |                             |        |         |         |      |
| ATOM 5887 | OE2   | OE2 | . GLU GLU GLU B B 333 333 . | 78.942 | 125.289 | -18.509 | 1.00 |
| 7.31      | 1 . . |     |                             |        |         |         |      |
| ATOM 5888 | C     | C   | . GLU GLU GLU B B 333 333 . | 78.539 | 120.615 | -20.709 | 1.00 |
| 2.88      | 1 . . |     |                             |        |         |         |      |
| ATOM 5889 | O     | O   | . GLU GLU GLU B B 333 333 . | 79.701 | 120.835 | -21.084 | 1.00 |
| 2.85      | 1 . . |     |                             |        |         |         |      |
| ATOM 5890 | N     | N   | . LYS LYS LYS B B 334 334 . | 78.074 | 119.375 | -20.571 | 1.00 |
| 2.99      | 1 . . |     |                             |        |         |         |      |
| ATOM 5891 | CA    | CA  | . LYS LYS LYS B B 334 334 . | 78.996 | 118.227 | -20.698 | 1.00 |
| 3.48      | 1 . . |     |                             |        |         |         |      |
| ATOM 5892 | CB    | CB  | . LYS LYS LYS B B 334 334 . | 79.303 | 117.966 | -22.196 | 1.00 |
| 3.65      | 1 . . |     |                             |        |         |         |      |
| ATOM 5893 | CG    | CG  | . LYS LYS LYS B B 334 334 . | 77.977 | 117.612 | -22.961 | 1.00 |
| 4.00      | 1 . . |     |                             |        |         |         |      |
| ATOM 5894 | CD    | CD  | . LYS LYS LYS B B 334 334 . | 78.325 | 116.934 | -24.273 | 1.00 |
| 10.16     | 1 . . |     |                             |        |         |         |      |
| ATOM 5895 | CE    | CE  | . LYS LYS LYS B B 334 334 . | 77.171 | 117.068 | -25.270 | 1.00 |
| 12.68     | 1 . . |     |                             |        |         |         |      |
| ATOM 5896 | NZ    | NZ  | . LYS LYS LYS B B 334 334 . | 76.003 | 116.512 | -24.664 | 1.00 |
| 15.55     | 1 . . |     |                             |        |         |         |      |
| ATOM 5897 | C     | C   | . LYS LYS LYS B B 334 334 . | 80.278 | 118.421 | -19.877 | 1.00 |
| 2.39      | 1 . . |     |                             |        |         |         |      |
| ATOM 5898 | O     | O   | . LYS LYS LYS B B 334 334 . | 81.414 | 118.217 | -20.366 | 1.00 |
| 3.16      | 1 . . |     |                             |        |         |         |      |
| ATOM 5899 | N     | N   | . ALA ALA ALA B B 335 335 . | 80.094 | 118.902 | -18.632 | 1.00 |
| 2.37      | 1 . . |     |                             |        |         |         |      |
| ATOM 5900 | CA    | CA  | . ALA ALA ALA B B 335 335 . | 81.235 | 119.202 | -17.714 | 1.00 |
| 2.30      | 1 . . |     |                             |        |         |         |      |
| ATOM 5901 | CB    | CB  | . ALA ALA ALA B B 335 335 . | 80.709 | 119.969 | -16.576 | 1.00 |
| 3.37      | 1 . . |     |                             |        |         |         |      |

|           |     |       |                             |        |         |         |      |
|-----------|-----|-------|-----------------------------|--------|---------|---------|------|
| ATOM 5902 | C   | C     | . ALA ALA ALA B B 335 335 . | 81.943 | 117.937 | -17.184 | 1.00 |
| 2.07      | 1   | . . . |                             |        |         |         |      |
| ATOM 5903 | O   | O     | . ALA ALA ALA B B 335 335 . | 83.157 | 117.974 | -16.944 | 1.00 |
| 2.00      | 1   | . . . |                             |        |         |         |      |
| ATOM 5904 | N   | N     | . CYS CYS CYS B B 336 336 . | 81.176 | 116.824 | -17.102 | 1.00 |
| 2.54      | 1   | . . . |                             |        |         |         |      |
| ATOM 5905 | CA  | CA    | . CYS CYS CYS B B 336 336 . | 81.729 | 115.595 | -16.461 | 1.00 |
| 2.68      | 1   | . . . |                             |        |         |         |      |
| ATOM 5906 | CB  | CB    | . CYS CYS CYS B B 336 336 . | 81.759 | 115.708 | -14.887 | 1.00 |
| 2.55      | 1   | . . . |                             |        |         |         |      |
| ATOM 5907 | SG  | SG    | . CYS CYS CYS B B 336 336 . | 80.155 | 115.982 | -14.167 | 1.00 |
| 2.97      | 1   | . . . |                             |        |         |         |      |
| ATOM 5908 | C   | C     | . CYS CYS CYS B B 336 336 . | 80.889 | 114.427 | -16.915 | 1.00 |
| 2.46      | 1   | . . . |                             |        |         |         |      |
| ATOM 5909 | O   | O     | . CYS CYS CYS B B 336 336 . | 79.929 | 114.642 | -17.630 | 1.00 |
| 3.70      | 1   | . . . |                             |        |         |         |      |
| ATOM 5910 | N   | N     | . ASN ASN ASN B B 337 337 . | 81.213 | 113.181 | -16.527 | 1.00 |
| 2.41      | 1   | . . . |                             |        |         |         |      |
| ATOM 5911 | CA  | CA    | . ASN ASN ASN B B 337 337 . | 80.403 | 112.091 | -17.009 | 1.00 |
| 3.17      | 1   | . . . |                             |        |         |         |      |
| ATOM 5912 | CB  | CB    | . ASN ASN ASN B B 337 337 . | 81.073 | 111.394 | -18.236 | 1.00 |
| 2.96      | 1   | . . . |                             |        |         |         |      |
| ATOM 5913 | CG  | CG    | . ASN ASN ASN B B 337 337 . | 82.545 | 110.952 | -17.939 | 1.00 |
| 2.44      | 1   | . . . |                             |        |         |         |      |
| ATOM 5914 | OD1 | OD1   | . ASN ASN ASN B B 337 337 . | 82.902 | 110.510 | -16.830 | 1.00 |
| 2.99      | 1   | . . . |                             |        |         |         |      |
| ATOM 5915 | ND2 | ND2   | . ASN ASN ASN B B 337 337 . | 83.403 | 111.044 | -18.916 | 1.00 |
| 3.43      | 1   | . . . |                             |        |         |         |      |
| ATOM 5916 | C   | C     | . ASN ASN ASN B B 337 337 . | 80.131 | 111.079 | -15.879 | 1.00 |
| 2.14      | 1   | . . . |                             |        |         |         |      |
| ATOM 5917 | O   | O     | . ASN ASN ASN B B 337 337 . | 79.749 | 109.953 | -16.104 | 1.00 |
| 3.37      | 1   | . . . |                             |        |         |         |      |
| ATOM 5918 | N   | N     | . CYS CYS CYS B B 338 338 . | 80.414 | 111.506 | -14.666 | 1.00 |
| 2.50      | 1   | . . . |                             |        |         |         |      |
| ATOM 5919 | CA  | CA    | . CYS CYS CYS B B 338 338 . | 80.139 | 110.650 | -13.482 | 1.00 |
| 2.10      | 1   | . . . |                             |        |         |         |      |
| ATOM 5920 | CB  | CB    | . CYS CYS CYS B B 338 338 . | 81.364 | 109.777 | -13.182 | 1.00 |
| 2.18      | 1   | . . . |                             |        |         |         |      |
| ATOM 5921 | SG  | SG    | . CYS CYS CYS B B 338 338 . | 81.078 | 108.589 | -11.774 | 1.00 |
| 3.53      | 1   | . . . |                             |        |         |         |      |
| ATOM 5922 | C   | C     | . CYS CYS CYS B B 338 338 . | 79.836 | 111.559 | -12.323 | 1.00 |
| 2.60      | 1   | . . . |                             |        |         |         |      |
| ATOM 5923 | O   | O     | . CYS CYS CYS B B 338 338 . | 80.439 | 112.618 | -12.198 | 1.00 |
| 2.00      | 1   | . . . |                             |        |         |         |      |
| ATOM 5924 | N   | N     | . LEU LEU LEU B B 339 339 . | 78.836 | 111.132 | -11.572 | 1.00 |
| 2.26      | 1   | . . . |                             |        |         |         |      |
| ATOM 5925 | CA  | CA    | . LEU LEU LEU B B 339 339 . | 78.432 | 111.882 | -10.339 | 1.00 |
| 2.45      | 1   | . . . |                             |        |         |         |      |
| ATOM 5926 | CB  | CB    | . LEU LEU LEU B B 339 339 . | 76.916 | 111.900 | -10.238 | 1.00 |
| 2.85      | 1   | . . . |                             |        |         |         |      |
| ATOM 5927 | CG  | CG    | . LEU LEU LEU B B 339 339 . | 76.265 | 112.436 | -8.961  | 1.00 |
| 2.17      | 1   | . . . |                             |        |         |         |      |
| ATOM 5928 | CD1 | CD1   | . LEU LEU LEU B B 339 339 . | 76.572 | 113.933 | -8.936  | 1.00 |
| 4.97      | 1   | . . . |                             |        |         |         |      |



|           |       |     |                   |         |          |         |        |      |
|-----------|-------|-----|-------------------|---------|----------|---------|--------|------|
| ATOM 5929 | CD2   | CD2 | . LEU LEU LEU B B | 339 339 | . 74.817 | 112.181 | -8.949 | 1.00 |
| 2.64      | 1 . . |     |                   |         |          |         |        |      |
| ATOM 5930 | C     | C   | . LEU LEU LEU B B | 339 339 | . 79.037 | 111.200 | -9.103 | 1.00 |
| 2.00      | 1 . . |     |                   |         |          |         |        |      |
| ATOM 5931 | O     | O   | . LEU LEU LEU B B | 339 339 | . 78.820 | 109.986 | -8.933 | 1.00 |
| 3.14      | 1 . . |     |                   |         |          |         |        |      |
| ATOM 5932 | N     | N   | . LEU LEU LEU B B | 340 340 | . 79.655 | 111.955 | -8.220 | 1.00 |
| 3.18      | 1 . . |     |                   |         |          |         |        |      |
| ATOM 5933 | CA    | CA  | . LEU LEU LEU B B | 340 340 | . 79.914 | 111.413 | -6.861 | 1.00 |
| 2.55      | 1 . . |     |                   |         |          |         |        |      |
| ATOM 5934 | CB    | CB  | . LEU LEU LEU B B | 340 340 | . 81.140 | 112.099 | -6.263 | 1.00 |
| 2.52      | 1 . . |     |                   |         |          |         |        |      |
| ATOM 5935 | CG    | CG  | . LEU LEU LEU B B | 340 340 | . 81.638 | 111.254 | -5.148 | 1.00 |
| 3.13      | 1 . . |     |                   |         |          |         |        |      |
| ATOM 5936 | CD1   | CD1 | . LEU LEU LEU B B | 340 340 | . 82.371 | 110.102 | -5.769 | 1.00 |
| 4.23      | 1 . . |     |                   |         |          |         |        |      |
| ATOM 5937 | CD2   | CD2 | . LEU LEU LEU B B | 340 340 | . 82.621 | 112.059 | -4.193 | 1.00 |
| 2.37      | 1 . . |     |                   |         |          |         |        |      |
| ATOM 5938 | C     | C   | . LEU LEU LEU B B | 340 340 | . 78.675 | 111.567 | -5.974 | 1.00 |
| 2.69      | 1 . . |     |                   |         |          |         |        |      |
| ATOM 5939 | O     | O   | . LEU LEU LEU B B | 340 340 | . 78.147 | 112.717 | -5.779 | 1.00 |
| 3.64      | 1 . . |     |                   |         |          |         |        |      |
| ATOM 5940 | N     | N   | . LEU LEU LEU B B | 341 341 | . 78.160 | 110.480 | -5.388 | 1.00 |
| 2.62      | 1 . . |     |                   |         |          |         |        |      |
| ATOM 5941 | CA    | CA  | . LEU LEU LEU B B | 341 341 | . 76.872 | 110.534 | -4.741 | 1.00 |
| 2.00      | 1 . . |     |                   |         |          |         |        |      |
| ATOM 5942 | CB    | CB  | . LEU LEU LEU B B | 341 341 | . 75.944 | 109.338 | -5.118 | 1.00 |
| 2.32      | 1 . . |     |                   |         |          |         |        |      |
| ATOM 5943 | CG    | CG  | . LEU LEU LEU B B | 341 341 | . 74.471 | 109.591 | -4.810 | 1.00 |
| 2.29      | 1 . . |     |                   |         |          |         |        |      |
| ATOM 5944 | CD1   | CD1 | . LEU LEU LEU B B | 341 341 | . 73.737 | 110.427 | -5.866 | 1.00 |
| 6.38      | 1 . . |     |                   |         |          |         |        |      |
| ATOM 5945 | CD2   | CD2 | . LEU LEU LEU B B | 341 341 | . 73.743 | 108.271 | -4.712 | 1.00 |
| 7.47      | 1 . . |     |                   |         |          |         |        |      |
| ATOM 5946 | C     | C   | . LEU LEU LEU B B | 341 341 | . 77.111 | 110.611 | -3.173 | 1.00 |
| 2.40      | 1 . . |     |                   |         |          |         |        |      |
| ATOM 5947 | O     | O   | . LEU LEU LEU B B | 341 341 | . 77.486 | 109.587 | -2.566 | 1.00 |
| 2.87      | 1 . . |     |                   |         |          |         |        |      |
| ATOM 5948 | N     | N   | . LYS LYS LYS B B | 342 342 | . 76.827 | 111.787 | -2.588 | 1.00 |
| 3.75      | 1 . . |     |                   |         |          |         |        |      |
| ATOM 5949 | CA    | CA  | . LYS LYS LYS B B | 342 342 | . 77.066 | 112.016 | -1.164 | 1.00 |
| 3.58      | 1 . . |     |                   |         |          |         |        |      |
| ATOM 5950 | CB    | CB  | . LYS LYS LYS B B | 342 342 | . 78.095 | 113.083 | -0.883 | 1.00 |
| 2.73      | 1 . . |     |                   |         |          |         |        |      |
| ATOM 5951 | CG    | CG  | . LYS LYS LYS B B | 342 342 | . 79.541 | 112.598 | -1.110 | 1.00 |
| 5.08      | 1 . . |     |                   |         |          |         |        |      |
| ATOM 5952 | CD    | CD  | . LYS LYS LYS B B | 342 342 | . 80.449 | 113.741 | -1.102 | 1.00 |
| 2.90      | 1 . . |     |                   |         |          |         |        |      |
| ATOM 5953 | CE    | CE  | . LYS LYS LYS B B | 342 342 | . 81.888 | 113.353 | -0.881 | 1.00 |
| 4.21      | 1 . . |     |                   |         |          |         |        |      |
| ATOM 5954 | NZ    | NZ  | . LYS LYS LYS B B | 342 342 | . 82.862 | 114.378 | -1.245 | 1.00 |
| 5.92      | 1 . . |     |                   |         |          |         |        |      |
| ATOM 5955 | C     | C   | . LYS LYS LYS B B | 342 342 | . 75.744 | 112.411 | -0.615 | 1.00 |
| 2.55      | 1 . . |     |                   |         |          |         |        |      |





|           |       |     |                             |        |         |        |      |
|-----------|-------|-----|-----------------------------|--------|---------|--------|------|
| ATOM 6010 | CG2   | CG2 | . THR THR THR B B 350 350 . | 62.681 | 112.236 | -2.327 | 1.00 |
| 8.39      | 1 . . |     |                             |        |         |        |      |
| ATOM 6011 | C     | C   | . THR THR THR B B 350 350 . | 65.650 | 111.860 | -2.680 | 1.00 |
| 5.10      | 1 . . |     |                             |        |         |        |      |
| ATOM 6012 | O     | O   | . THR THR THR B B 350 350 . | 65.621 | 111.544 | -3.884 | 1.00 |
| 5.33      | 1 . . |     |                             |        |         |        |      |
| ATOM 6013 | N     | N   | . GLU GLU GLU B B 351 351 . | 66.320 | 112.918 | -2.236 | 1.00 |
| 5.10      | 1 . . |     |                             |        |         |        |      |
| ATOM 6014 | CA    | CA  | . GLU GLU GLU B B 351 351 . | 66.989 | 113.781 | -3.200 | 1.00 |
| 3.70      | 1 . . |     |                             |        |         |        |      |
| ATOM 6015 | CB    | CB  | . GLU GLU GLU B B 351 351 . | 67.306 | 115.117 | -2.574 | 1.00 |
| 5.77      | 1 . . |     |                             |        |         |        |      |
| ATOM 6016 | CG    | CG  | . GLU GLU GLU B B 351 351 . | 66.022 | 115.954 | -2.241 | 1.00 |
| 4.81      | 1 . . |     |                             |        |         |        |      |
| ATOM 6017 | CD    | CD  | . GLU GLU GLU B B 351 351 . | 66.483 | 117.131 | -1.411 | 1.00 |
| 7.53      | 1 . . |     |                             |        |         |        |      |
| ATOM 6018 | OE1   | OE1 | . GLU GLU GLU B B 351 351 . | 66.872 | 116.948 | -0.239 | 1.00 |
| 8.59      | 1 . . |     |                             |        |         |        |      |
| ATOM 6019 | OE2   | OE2 | . GLU GLU GLU B B 351 351 . | 66.566 | 118.245 | -1.918 | 1.00 |
| 13.87     | 1 . . |     |                             |        |         |        |      |
| ATOM 6020 | C     | C   | . GLU GLU GLU B B 351 351 . | 68.250 | 113.087 | -3.719 | 1.00 |
| 4.36      | 1 . . |     |                             |        |         |        |      |
| ATOM 6021 | O     | O   | . GLU GLU GLU B B 351 351 . | 68.687 | 113.370 | -4.832 | 1.00 |
| 4.59      | 1 . . |     |                             |        |         |        |      |
| ATOM 6022 | N     | N   | . ALA ALA ALA B B 352 352 . | 68.887 | 112.265 | -2.897 | 1.00 |
| 2.94      | 1 . . |     |                             |        |         |        |      |
| ATOM 6023 | CA    | CA  | . ALA ALA ALA B B 352 352 . | 70.086 | 111.641 | -3.417 | 1.00 |
| 4.15      | 1 . . |     |                             |        |         |        |      |
| ATOM 6024 | CB    | CB  | . ALA ALA ALA B B 352 352 . | 70.917 | 111.022 | -2.294 | 1.00 |
| 4.79      | 1 . . |     |                             |        |         |        |      |
| ATOM 6025 | C     | C   | . ALA ALA ALA B B 352 352 . | 69.693 | 110.615 | -4.442 | 1.00 |
| 3.78      | 1 . . |     |                             |        |         |        |      |
| ATOM 6026 | O     | O   | . ALA ALA ALA B B 352 352 . | 70.415 | 110.380 | -5.441 | 1.00 |
| 5.69      | 1 . . |     |                             |        |         |        |      |
| ATOM 6027 | N     | N   | . ILE ILE ILE B B 353 353 . | 68.594 | 109.925 | -4.186 | 1.00 |
| 4.28      | 1 . . |     |                             |        |         |        |      |
| ATOM 6028 | CA    | CA  | . ILE ILE ILE B B 353 353 . | 68.129 | 109.000 | -5.187 | 1.00 |
| 5.40      | 1 . . |     |                             |        |         |        |      |
| ATOM 6029 | CB    | CB  | . ILE ILE ILE B B 353 353 . | 66.962 | 108.126 | -4.663 | 1.00 |
| 5.22      | 1 . . |     |                             |        |         |        |      |
| ATOM 6030 | CG1   | CG1 | . ILE ILE ILE B B 353 353 . | 67.469 | 107.276 | -3.502 | 1.00 |
| 5.90      | 1 . . |     |                             |        |         |        |      |
| ATOM 6031 | CD1   | CD1 | . ILE ILE ILE B B 353 353 . | 66.287 | 106.421 | -2.839 | 1.00 |
| 7.21      | 1 . . |     |                             |        |         |        |      |
| ATOM 6032 | CG2   | CG2 | . ILE ILE ILE B B 353 353 . | 66.395 | 107.261 | -5.816 | 1.00 |
| 6.79      | 1 . . |     |                             |        |         |        |      |
| ATOM 6033 | C     | C   | . ILE ILE ILE B B 353 353 . | 67.742 | 109.682 | -6.515 | 1.00 |
| 5.00      | 1 . . |     |                             |        |         |        |      |
| ATOM 6034 | O     | O   | . ILE ILE ILE B B 353 353 . | 68.105 | 109.187 | -7.596 | 1.00 |
| 7.12      | 1 . . |     |                             |        |         |        |      |
| ATOM 6035 | N     | N   | . GLN GLN GLN B B 354 354 . | 67.020 | 110.798 | -6.392 | 1.00 |
| 5.04      | 1 . . |     |                             |        |         |        |      |
| ATOM 6036 | CA    | CA  | . GLN GLN GLN B B 354 354 . | 66.723 | 111.661 | -7.566 | 1.00 |
| 6.45      | 1 . . |     |                             |        |         |        |      |

|           |     |     |                             |        |         |         |      |
|-----------|-----|-----|-----------------------------|--------|---------|---------|------|
| ATOM 6037 | CB  | CB  | . GLN GLN GLN B B 354 354 . | 65.850 | 112.864 | -7.161  | 1.00 |
| 7.56      | 1   | . . |                             |        |         |         |      |
| ATOM 6038 | CG  | CG  | . GLN GLN GLN B B 354 354 . | 65.937 | 114.068 | -8.098  | 1.00 |
| 12.72     | 1   | . . |                             |        |         |         |      |
| ATOM 6039 | CD  | CD  | . GLN GLN GLN B B 354 354 . | 65.124 | 115.271 | -7.612  | 1.00 |
| 20.02     | 1   | . . |                             |        |         |         |      |
| ATOM 6040 | OE1 | OE1 | . GLN GLN GLN B B 354 354 . | 64.852 | 115.426 | -6.393  | 1.00 |
| 22.61     | 1   | . . |                             |        |         |         |      |
| ATOM 6041 | NE2 | NE2 | . GLN GLN GLN B B 354 354 . | 64.721 | 116.136 | -8.563  | 1.00 |
| 22.87     | 1   | . . |                             |        |         |         |      |
| ATOM 6042 | C   | C   | . GLN GLN GLN B B 354 354 . | 67.959 | 112.090 | -8.293  | 1.00 |
| 6.81      | 1   | . . |                             |        |         |         |      |
| ATOM 6043 | O   | O   | . GLN GLN GLN B B 354 354 . | 67.984 | 112.107 | -9.557  | 1.00 |
| 7.76      | 1   | . . |                             |        |         |         |      |
| ATOM 6044 | N   | N   | . ALA ALA ALA B B 355 355 . | 68.994 | 112.492 | -7.552  | 1.00 |
| 5.35      | 1   | . . |                             |        |         |         |      |
| ATOM 6045 | CA  | CA  | . ALA ALA ALA B B 355 355 . | 70.241 | 112.895 | -8.228  | 1.00 |
| 4.28      | 1   | . . |                             |        |         |         |      |
| ATOM 6046 | CB  | CB  | . ALA ALA ALA B B 355 355 . | 71.240 | 113.464 | -7.236  | 1.00 |
| 4.33      | 1   | . . |                             |        |         |         |      |
| ATOM 6047 | C   | C   | . ALA ALA ALA B B 355 355 . | 70.859 | 111.716 | -8.986  | 1.00 |
| 4.36      | 1   | . . |                             |        |         |         |      |
| ATOM 6048 | O   | O   | . ALA ALA ALA B B 355 355 . | 71.370 | 111.856 | -10.066 | 1.00 |
| 5.43      | 1   | . . |                             |        |         |         |      |
| ATOM 6049 | N   | N   | . CYS CYS CYS B B 356 356 . | 70.818 | 110.536 | -8.351  | 1.00 |
| 4.51      | 1   | . . |                             |        |         |         |      |
| ATOM 6050 | CA  | CA  | . CYS CYS CYS B B 356 356 . | 71.452 | 109.339 | -9.003  | 1.00 |
| 3.53      | 1   | . . |                             |        |         |         |      |
| ATOM 6051 | CB  | CB  | . CYS CYS CYS B B 356 356 . | 71.388 | 108.149 | -8.068  | 1.00 |
| 3.39      | 1   | . . |                             |        |         |         |      |
| ATOM 6052 | SG  | SG  | . CYS CYS CYS B B 356 356 . | 72.134 | 106.612 | -8.709  | 1.00 |
| 5.38      | 1   | . . |                             |        |         |         |      |
| ATOM 6053 | C   | C   | . CYS CYS CYS B B 356 356 . | 70.766 | 108.996 | -10.303 | 1.00 |
| 4.78      | 1   | . . |                             |        |         |         |      |
| ATOM 6054 | O   | O   | . CYS CYS CYS B B 356 356 . | 71.397 | 108.760 | -11.332 | 1.00 |
| 5.61      | 1   | . . |                             |        |         |         |      |
| ATOM 6055 | N   | N   | . LYS LYS LYS B B 357 357 . | 69.458 | 109.025 | -10.243 | 1.00 |
| 4.35      | 1   | . . |                             |        |         |         |      |
| ATOM 6056 | CA  | CA  | . LYS LYS LYS B B 357 357 . | 68.634 | 108.744 | -11.394 | 1.00 |
| 6.10      | 1   | . . |                             |        |         |         |      |
| ATOM 6057 | CB  | CB  | . LYS LYS LYS B B 357 357 . | 67.186 | 108.625 | -10.975 | 1.00 |
| 6.96      | 1   | . . |                             |        |         |         |      |
| ATOM 6058 | CG  | CG  | . LYS LYS LYS B B 357 357 . | 66.911 | 107.272 | -10.234 | 1.00 |
| 10.79     | 1   | . . |                             |        |         |         |      |
| ATOM 6059 | CD  | CD  | . LYS LYS LYS B B 357 357 . | 65.484 | 107.169 | -9.693  | 1.00 |
| 17.40     | 1   | . . |                             |        |         |         |      |
| ATOM 6060 | CE  | CE  | . LYS LYS LYS B B 357 357 . | 64.460 | 106.993 | -10.842 | 1.00 |
| 19.22     | 1   | . . |                             |        |         |         |      |
| ATOM 6061 | NZ  | NZ  | . LYS LYS LYS B B 357 357 . | 64.448 | 105.583 | -11.299 | 1.00 |
| 24.17     | 1   | . . |                             |        |         |         |      |
| ATOM 6062 | C   | C   | . LYS LYS LYS B B 357 357 . | 68.794 | 109.703 | -12.540 | 1.00 |
| 6.44      | 1   | . . |                             |        |         |         |      |
| ATOM 6063 | O   | O   | . LYS LYS LYS B B 357 357 . | 68.910 | 109.297 | -13.711 | 1.00 |
| 6.99      | 1   | . . |                             |        |         |         |      |

|           |       |     |                             |        |         |         |      |
|-----------|-------|-----|-----------------------------|--------|---------|---------|------|
| ATOM 6064 | N     | N   | . LEU LEU LEU B B 358 358 . | 68.861 | 110.993 | -12.191 | 1.00 |
| 5.88      | 1 . . |     |                             |        |         |         |      |
| ATOM 6065 | CA    | CA  | . LEU LEU LEU B B 358 358 . | 69.173 | 112.004 | -13.192 | 1.00 |
| 5.71      | 1 . . |     |                             |        |         |         |      |
| ATOM 6066 | CB    | CB  | . LEU LEU LEU B B 358 358 . | 69.202 | 113.372 | -12.490 | 1.00 |
| 6.37      | 1 . . |     |                             |        |         |         |      |
| ATOM 6067 | CG    | CG  | . LEU LEU LEU B B 358 358 . | 69.357 | 114.564 | -13.430 | 1.00 |
| 7.54      | 1 . . |     |                             |        |         |         |      |
| ATOM 6068 | CD1   | CD1 | . LEU LEU LEU B B 358 358 . | 68.129 | 114.592 | -14.433 | 1.00 |
| 6.55      | 1 . . |     |                             |        |         |         |      |
| ATOM 6069 | CD2   | CD2 | . LEU LEU LEU B B 358 358 . | 69.326 | 115.894 | -12.665 | 1.00 |
| 5.25      | 1 . . |     |                             |        |         |         |      |
| ATOM 6070 | C     | C   | . LEU LEU LEU B B 358 358 . | 70.487 | 111.746 | -13.889 | 1.00 |
| 5.74      | 1 . . |     |                             |        |         |         |      |
| ATOM 6071 | O     | O   | . LEU LEU LEU B B 358 358 . | 70.584 | 111.916 | -15.166 | 1.00 |
| 6.64      | 1 . . |     |                             |        |         |         |      |
| ATOM 6072 | N     | N   | . ALA ALA ALA B B 359 359 . | 71.531 | 111.485 | -13.099 | 1.00 |
| 5.05      | 1 . . |     |                             |        |         |         |      |
| ATOM 6073 | CA    | CA  | . ALA ALA ALA B B 359 359 . | 72.837 | 111.224 | -13.728 | 1.00 |
| 4.28      | 1 . . |     |                             |        |         |         |      |
| ATOM 6074 | CB    | CB  | . ALA ALA ALA B B 359 359 . | 73.917 | 110.894 | -12.736 | 1.00 |
| 5.41      | 1 . . |     |                             |        |         |         |      |
| ATOM 6075 | C     | C   | . ALA ALA ALA B B 359 359 . | 72.693 | 110.044 | -14.698 | 1.00 |
| 4.33      | 1 . . |     |                             |        |         |         |      |
| ATOM 6076 | O     | O   | . ALA ALA ALA B B 359 359 . | 73.095 | 110.097 | -15.850 | 1.00 |
| 5.42      | 1 . . |     |                             |        |         |         |      |
| ATOM 6077 | N     | N   | . GLN GLN GLN B B 360 360 . | 72.139 | 108.958 | -14.189 | 1.00 |
| 3.57      | 1 . . |     |                             |        |         |         |      |
| ATOM 6078 | CA    | CA  | . GLN GLN GLN B B 360 360 . | 72.054 | 107.665 | -14.948 | 1.00 |
| 5.78      | 1 . . |     |                             |        |         |         |      |
| ATOM 6079 | CB    | CB  | . GLN GLN GLN B B 360 360 . | 71.463 | 106.595 | -14.028 | 1.00 |
| 5.08      | 1 . . |     |                             |        |         |         |      |
| ATOM 6080 | CG    | CG  | . GLN GLN GLN B B 360 360 . | 72.476 | 106.129 | -12.911 | 1.00 |
| 4.06      | 1 . . |     |                             |        |         |         |      |
| ATOM 6081 | CD    | CD  | . GLN GLN GLN B B 360 360 . | 71.883 | 105.060 | -12.019 | 1.00 |
| 8.25      | 1 . . |     |                             |        |         |         |      |
| ATOM 6082 | OE1   | OE1 | . GLN GLN GLN B B 360 360 . | 70.661 | 105.062 | -11.710 | 1.00 |
| 9.48      | 1 . . |     |                             |        |         |         |      |
| ATOM 6083 | NE2   | NE2 | . GLN GLN GLN B B 360 360 . | 72.777 | 104.179 | -11.494 | 1.00 |
| 9.90      | 1 . . |     |                             |        |         |         |      |
| ATOM 6084 | C     | C   | . GLN GLN GLN B B 360 360 . | 71.205 | 107.836 | -16.189 | 1.00 |
| 6.02      | 1 . . |     |                             |        |         |         |      |
| ATOM 6085 | O     | O   | . GLN GLN GLN B B 360 360 . | 71.552 | 107.287 | -17.224 | 1.00 |
| 5.07      | 1 . . |     |                             |        |         |         |      |
| ATOM 6086 | N     | N   | . GLU GLU GLU B B 361 361 . | 70.078 | 108.551 | -16.084 | 1.00 |
| 7.79      | 1 . . |     |                             |        |         |         |      |
| ATOM 6087 | CA    | CA  | . GLU GLU GLU B B 361 361 . | 69.194 | 108.877 | -17.263 | 1.00 |
| 9.42      | 1 . . |     |                             |        |         |         |      |
| ATOM 6088 | CB    | CB  | . GLU GLU GLU B B 361 361 . | 68.132 | 109.867 | -16.834 | 1.00 |
| 10.25     | 1 . . |     |                             |        |         |         |      |
| ATOM 6089 | CG    | CG  | . GLU GLU GLU B B 361 361 . | 66.818 | 109.349 | -16.331 | 1.00 |
| 17.20     | 1 . . |     |                             |        |         |         |      |
| ATOM 6090 | CD    | CD  | . GLU GLU GLU B B 361 361 . | 65.791 | 110.504 | -16.216 | 1.00 |
| 25.94     | 1 . . |     |                             |        |         |         |      |

|           |       |     |                             |        |         |         |      |
|-----------|-------|-----|-----------------------------|--------|---------|---------|------|
| ATOM 6091 | OE1   | OE1 | . GLU GLU GLU B B 361 361 . | 66.179 | 111.603 | -15.699 | 1.00 |
| 28.56     | 1 . . |     |                             |        |         |         |      |
| ATOM 6092 | OE2   | OE2 | . GLU GLU GLU B B 361 361 . | 64.605 | 110.327 | -16.654 | 1.00 |
| 27.69     | 1 . . |     |                             |        |         |         |      |
| ATOM 6093 | C     | C   | . GLU GLU GLU B B 361 361 . | 69.976 | 109.554 | -18.362 | 1.00 |
| 7.78      | 1 . . |     |                             |        |         |         |      |
| ATOM 6094 | O     | O   | . GLU GLU GLU B B 361 361 . | 69.644 | 109.401 | -19.555 | 1.00 |
| 9.57      | 1 . . |     |                             |        |         |         |      |
| ATOM 6095 | N     | N   | . ASN ASN ASN B B 362 362 . | 71.012 | 110.299 | -17.957 | 1.00 |
| 5.91      | 1 . . |     |                             |        |         |         |      |
| ATOM 6096 | CA    | CA  | . ASN ASN ASN B B 362 362 . | 71.826 | 111.072 | -18.860 | 1.00 |
| 5.63      | 1 . . |     |                             |        |         |         |      |
| ATOM 6097 | CB    | CB  | . ASN ASN ASN B B 362 362 . | 72.044 | 112.444 | -18.286 | 1.00 |
| 5.71      | 1 . . |     |                             |        |         |         |      |
| ATOM 6098 | CG    | CG  | . ASN ASN ASN B B 362 362 . | 70.843 | 113.326 | -18.519 | 1.00 |
| 5.96      | 1 . . |     |                             |        |         |         |      |
| ATOM 6099 | OD1   | OD1 | . ASN ASN ASN B B 362 362 . | 70.603 | 113.749 | -19.680 | 1.00 |
| 8.57      | 1 . . |     |                             |        |         |         |      |
| ATOM 6100 | ND2   | ND2 | . ASN ASN ASN B B 362 362 . | 70.046 | 113.553 | -17.479 | 1.00 |
| 8.09      | 1 . . |     |                             |        |         |         |      |
| ATOM 6101 | C     | C   | . ASN ASN ASN B B 362 362 . | 73.112 | 110.423 | -19.312 | 1.00 |
| 4.17      | 1 . . |     |                             |        |         |         |      |
| ATOM 6102 | O     | O   | . ASN ASN ASN B B 362 362 . | 74.018 | 111.076 | -19.867 | 1.00 |
| 7.81      | 1 . . |     |                             |        |         |         |      |
| ATOM 6103 | N     | N   | . GLY GLY GLY B B 363 363 . | 73.248 | 109.147 | -18.977 | 1.00 |
| 5.08      | 1 . . |     |                             |        |         |         |      |
| ATOM 6104 | CA    | CA  | . GLY GLY GLY B B 363 363 . | 74.366 | 108.387 | -19.458 | 1.00 |
| 4.73      | 1 . . |     |                             |        |         |         |      |
| ATOM 6105 | C     | C   | . GLY GLY GLY B B 363 363 . | 75.600 | 108.529 | -18.615 | 1.00 |
| 5.03      | 1 . . |     |                             |        |         |         |      |
| ATOM 6106 | O     | O   | . GLY GLY GLY B B 363 363 . | 76.641 | 108.105 | -19.046 | 1.00 |
| 7.18      | 1 . . |     |                             |        |         |         |      |
| ATOM 6107 | N     | N   | . TRP TRP TRP B B 364 364 . | 75.476 | 109.087 | -17.412 | 1.00 |
| 3.27      | 1 . . |     |                             |        |         |         |      |
| ATOM 6108 | CA    | CA  | . TRP TRP TRP B B 364 364 . | 76.600 | 109.161 | -16.496 | 1.00 |
| 3.42      | 1 . . |     |                             |        |         |         |      |
| ATOM 6109 | CB    | CB  | . TRP TRP TRP B B 364 364 . | 76.409 | 110.343 | -15.505 | 1.00 |
| 3.01      | 1 . . |     |                             |        |         |         |      |
| ATOM 6110 | CG    | CG  | . TRP TRP TRP B B 364 364 . | 76.526 | 111.772 | -16.050 | 1.00 |
| 4.86      | 1 . . |     |                             |        |         |         |      |
| ATOM 6111 | CD1   | CD1 | . TRP TRP TRP B B 364 364 . | 76.410 | 112.246 | -17.375 | 1.00 |
| 3.69      | 1 . . |     |                             |        |         |         |      |
| ATOM 6112 | NE1   | NE1 | . TRP TRP TRP B B 364 364 . | 76.501 | 113.628 | -17.392 | 1.00 |
| 4.39      | 1 . . |     |                             |        |         |         |      |
| ATOM 6113 | CE2   | CE2 | . TRP TRP TRP B B 364 364 . | 76.676 | 114.067 | -16.101 | 1.00 |
| 4.77      | 1 . . |     |                             |        |         |         |      |
| ATOM 6114 | CD2   | CD2 | . TRP TRP TRP B B 364 364 . | 76.657 | 112.937 | -15.247 | 1.00 |
| 5.85      | 1 . . |     |                             |        |         |         |      |
| ATOM 6115 | CE3   | CE3 | . TRP TRP TRP B B 364 364 . | 76.754 | 113.131 | -13.855 | 1.00 |
| 3.76      | 1 . . |     |                             |        |         |         |      |
| ATOM 6116 | CZ3   | CZ3 | . TRP TRP TRP B B 364 364 . | 76.957 | 114.370 | -13.392 | 1.00 |
| 6.42      | 1 . . |     |                             |        |         |         |      |
| ATOM 6117 | CH2   | CH2 | . TRP TRP TRP B B 364 364 . | 76.921 | 115.495 | -14.239 | 1.00 |
| 4.25      | 1 . . |     |                             |        |         |         |      |

|           |       |     |                             |        |         |         |      |
|-----------|-------|-----|-----------------------------|--------|---------|---------|------|
| ATOM 6118 | CZ2   | CZ2 | . TRP TRP TRP B B 364 364 . | 76.810 | 115.378 | -15.601 | 1.00 |
| 4.32      | 1 . . |     |                             |        |         |         |      |
| ATOM 6119 | C     | C   | . TRP TRP TRP B B 364 364 . | 76.834 | 107.922 | -15.636 | 1.00 |
| 2.87      | 1 . . |     |                             |        |         |         |      |
| ATOM 6120 | O     | O   | . TRP TRP TRP B B 364 364 . | 75.922 | 107.182 | -15.410 | 1.00 |
| 4.91      | 1 . . |     |                             |        |         |         |      |
| ATOM 6121 | N     | N   | . GLY GLY GLY B B 365 365 . | 78.091 | 107.717 | -15.256 | 1.00 |
| 3.65      | 1 . . |     |                             |        |         |         |      |
| ATOM 6122 | CA    | CA  | . GLY GLY GLY B B 365 365 . | 78.389 | 106.818 | -14.127 | 1.00 |
| 4.02      | 1 . . |     |                             |        |         |         |      |
| ATOM 6123 | C     | C   | . GLY GLY GLY B B 365 365 . | 77.940 | 107.480 | -12.803 | 1.00 |
| 3.78      | 1 . . |     |                             |        |         |         |      |
| ATOM 6124 | O     | O   | . GLY GLY GLY B B 365 365 . | 77.649 | 108.697 | -12.744 | 1.00 |
| 4.31      | 1 . . |     |                             |        |         |         |      |
| ATOM 6125 | N     | N   | . VAL VAL VAL B B 366 366 . | 77.883 | 106.678 | -11.742 | 1.00 |
| 4.00      | 1 . . |     |                             |        |         |         |      |
| ATOM 6126 | CA    | CA  | . VAL VAL VAL B B 366 366 . | 77.694 | 107.272 | -10.394 | 1.00 |
| 2.96      | 1 . . |     |                             |        |         |         |      |
| ATOM 6127 | CB    | CB  | . VAL VAL VAL B B 366 366 . | 76.226 | 107.185 | -9.951  | 1.00 |
| 3.91      | 1 . . |     |                             |        |         |         |      |
| ATOM 6128 | CG1   | CG1 | . VAL VAL VAL B B 366 366 . | 76.040 | 107.687 | -8.495  | 1.00 |
| 4.10      | 1 . . |     |                             |        |         |         |      |
| ATOM 6129 | CG2   | CG2 | . VAL VAL VAL B B 366 366 . | 75.301 | 107.888 | -10.858 | 1.00 |
| 4.28      | 1 . . |     |                             |        |         |         |      |
| ATOM 6130 | C     | C   | . VAL VAL VAL B B 366 366 . | 78.580 | 106.450 | -9.443  | 1.00 |
| 2.34      | 1 . . |     |                             |        |         |         |      |
| ATOM 6131 | O     | O   | . VAL VAL VAL B B 366 366 . | 78.560 | 105.219 | -9.416  | 1.00 |
| 2.60      | 1 . . |     |                             |        |         |         |      |
| ATOM 6132 | N     | N   | . MET MET MET B B 367 367 . | 79.362 | 107.170 | -8.681  | 1.00 |
| 2.81      | 1 . . |     |                             |        |         |         |      |
| ATOM 6133 | CA    | CA  | . MET MET MET B B 367 367 . | 80.194 | 106.545 | -7.641  | 1.00 |
| 2.54      | 1 . . |     |                             |        |         |         |      |
| ATOM 6134 | CB    | CB  | . MET MET MET B B 367 367 . | 81.632 | 106.913 | -7.866  | 1.00 |
| 2.37      | 1 . . |     |                             |        |         |         |      |
| ATOM 6135 | CG    | CG  | . MET MET MET B B 367 367 . | 82.581 | 106.379 | -6.788  | 1.00 |
| 2.41      | 1 . . |     |                             |        |         |         |      |
| ATOM 6136 | SD    | SD  | . MET MET MET B B 367 367 . | 84.284 | 106.822 | -6.786  | 1.00 |
| 4.17      | 1 . . |     |                             |        |         |         |      |
| ATOM 6137 | CE    | CE  | . MET MET MET B B 367 367 . | 85.053 | 105.811 | -8.100  | 1.00 |
| 4.84      | 1 . . |     |                             |        |         |         |      |
| ATOM 6138 | C     | C   | . MET MET MET B B 367 367 . | 79.663 | 107.030 | -6.295  | 1.00 |
| 2.33      | 1 . . |     |                             |        |         |         |      |
| ATOM 6139 | O     | O   | . MET MET MET B B 367 367 . | 79.781 | 108.213 | -5.971  | 1.00 |
| 2.05      | 1 . . |     |                             |        |         |         |      |
| ATOM 6140 | N     | N   | . VAL VAL VAL B B 368 368 . | 79.111 | 106.095 | -5.495  | 1.00 |
| 2.65      | 1 . . |     |                             |        |         |         |      |
| ATOM 6141 | CA    | CA  | . VAL VAL VAL B B 368 368 . | 78.693 | 106.374 | -4.130  | 1.00 |
| 2.15      | 1 . . |     |                             |        |         |         |      |
| ATOM 6142 | CB    | CB  | . VAL VAL VAL B B 368 368 . | 77.839 | 105.207 | -3.603  | 1.00 |
| 3.26      | 1 . . |     |                             |        |         |         |      |
| ATOM 6143 | CG1   | CG1 | . VAL VAL VAL B B 368 368 . | 77.473 | 105.427 | -2.111  | 1.00 |
| 2.60      | 1 . . |     |                             |        |         |         |      |
| ATOM 6144 | CG2   | CG2 | . VAL VAL VAL B B 368 368 . | 76.580 | 105.096 | -4.434  | 1.00 |
| 3.34      | 1 . . |     |                             |        |         |         |      |



|           |       |     |                             |        |         |        |      |
|-----------|-------|-----|-----------------------------|--------|---------|--------|------|
| ATOM 6145 | C     | C   | . VAL VAL VAL B B 368 368 . | 79.911 | 106.681 | -3.275 | 1.00 |
| 2.54      | 1 . . |     |                             |        |         |        |      |
| ATOM 6146 | O     | O   | . VAL VAL VAL B B 368 368 . | 80.987 | 106.087 | -3.452 | 1.00 |
| 2.66      | 1 . . |     |                             |        |         |        |      |
| ATOM 6147 | N     | N   | . SER SER SER B B 369 369 . | 79.742 | 107.625 | -2.327 | 1.00 |
| 2.51      | 1 . . |     |                             |        |         |        |      |
| ATOM 6148 | CA    | CA  | . SER SER SER B B 369 369 . | 80.912 | 108.031 | -1.556 | 1.00 |
| 2.09      | 1 . . |     |                             |        |         |        |      |
| ATOM 6149 | CB    | CB  | . SER SER SER B B 369 369 . | 81.487 | 109.370 | -2.098 | 1.00 |
| 2.00      | 1 . . |     |                             |        |         |        |      |
| ATOM 6150 | OG    | OG  | . SER SER SER B B 369 369 . | 82.691 | 109.726 | -1.456 | 1.00 |
| 2.21      | 1 . . |     |                             |        |         |        |      |
| ATOM 6151 | C     | C   | . SER SER SER B B 369 369 . | 80.606 | 108.245 | -0.042 | 1.00 |
| 2.75      | 1 . . |     |                             |        |         |        |      |
| ATOM 6152 | O     | O   | . SER SER SER B B 369 369 . | 79.529 | 108.702 | 0.331  | 1.00 |
| 2.19      | 1 . . |     |                             |        |         |        |      |
| ATOM 6153 | N     | N   | . HIS HIS HIS B B 370 370 . | 81.615 | 107.937 | 0.740  | 1.00 |
| 2.30      | 1 . . |     |                             |        |         |        |      |
| ATOM 6154 | CA    | CA  | . HIS HIS HIS B B 370 370 . | 81.691 | 108.332 | 2.159  | 1.00 |
| 2.00      | 1 . . |     |                             |        |         |        |      |
| ATOM 6155 | CB    | CB  | . HIS HIS HIS B B 370 370 . | 82.791 | 107.523 | 2.856  | 1.00 |
| 2.34      | 1 . . |     |                             |        |         |        |      |
| ATOM 6156 | CG    | CG  | . HIS HIS HIS B B 370 370 . | 84.186 | 107.733 | 2.283  | 1.00 |
| 2.46      | 1 . . |     |                             |        |         |        |      |
| ATOM 6157 | ND1   | ND1 | . HIS HIS HIS B B 370 370 . | 85.312 | 107.341 | 2.970  | 1.00 |
| 3.10      | 1 . . |     |                             |        |         |        |      |
| ATOM 6158 | CE1   | CE1 | . HIS HIS HIS B B 370 370 . | 86.387 | 107.579 | 2.240  | 1.00 |
| 2.33      | 1 . . |     |                             |        |         |        |      |
| ATOM 6159 | NE2   | NE2 | . HIS HIS HIS B B 370 370 . | 86.013 | 108.170 | 1.123  | 1.00 |
| 3.42      | 1 . . |     |                             |        |         |        |      |
| ATOM 6160 | CD2   | CD2 | . HIS HIS HIS B B 370 370 . | 84.635 | 108.203 | 1.089  | 1.00 |
| 4.36      | 1 . . |     |                             |        |         |        |      |
| ATOM 6161 | C     | C   | . HIS HIS HIS B B 370 370 . | 82.032 | 109.840 | 2.221  | 1.00 |
| 2.82      | 1 . . |     |                             |        |         |        |      |
| ATOM 6162 | O     | O   | . HIS HIS HIS B B 370 370 . | 82.216 | 110.531 | 1.167  | 1.00 |
| 2.03      | 1 . . |     |                             |        |         |        |      |
| ATOM 6163 | N     | N   | . ARG ARG ARG B B 371 371 . | 82.180 | 110.323 | 3.437  | 1.00 |
| 2.94      | 1 . . |     |                             |        |         |        |      |
| ATOM 6164 | CA    | CA  | . ARG ARG ARG B B 371 371 . | 82.922 | 111.556 | 3.729  | 1.00 |
| 2.97      | 1 . . |     |                             |        |         |        |      |
| ATOM 6165 | CB    | CB  | . ARG ARG ARG B B 371 371 . | 82.051 | 112.618 | 4.489  | 1.00 |
| 2.46      | 1 . . |     |                             |        |         |        |      |
| ATOM 6166 | CG    | CG  | . ARG ARG ARG B B 371 371 . | 80.723 | 113.031 | 3.945  | 1.00 |
| 2.51      | 1 . . |     |                             |        |         |        |      |
| ATOM 6167 | CD    | CD  | . ARG ARG ARG B B 371 371 . | 80.841 | 113.486 | 2.528  | 1.00 |
| 3.02      | 1 . . |     |                             |        |         |        |      |
| ATOM 6168 | NE    | NE  | . ARG ARG ARG B B 371 371 . | 81.813 | 114.584 | 2.276  | 1.00 |
| 2.19      | 1 . . |     |                             |        |         |        |      |
| ATOM 6169 | CZ    | CZ  | . ARG ARG ARG B B 371 371 . | 81.424 | 115.820 | 1.974  | 1.00 |
| 2.11      | 1 . . |     |                             |        |         |        |      |
| ATOM 6170 | NH1   | NH1 | . ARG ARG ARG B B 371 371 . | 80.094 | 116.103 | 1.998  | 1.00 |
| 2.91      | 1 . . |     |                             |        |         |        |      |
| ATOM 6171 | NH2   | NH2 | . ARG ARG ARG B B 371 371 . | 82.367 | 116.727 | 1.662  | 1.00 |
| 3.45      | 1 . . |     |                             |        |         |        |      |

|           |       |     |                                                        |
|-----------|-------|-----|--------------------------------------------------------|
| ATOM 6172 | C     | C   | . ARG ARG ARG B B 371 371 . 84.179 111.270 4.486 1.00  |
| 2.99      | 1 . . |     |                                                        |
| ATOM 6173 | O     | O   | . ARG ARG ARG B B 371 371 . 84.304 110.140 5.042 1.00  |
| 2.94      | 1 . . |     |                                                        |
| ATOM 6174 | N     | N   | . SER SER SER B B 372 372 . 85.148 112.177 4.476 1.00  |
| 2.69      | 1 . . |     |                                                        |
| ATOM 6175 | CA    | CA  | . SER SER SER B B 372 372 . 86.363 111.931 5.196 1.00  |
| 2.52      | 1 . . |     |                                                        |
| ATOM 6176 | CB    | CB  | . SER SER SER B B 372 372 . 87.409 112.989 4.915 1.00  |
| 2.91      | 1 . . |     |                                                        |
| ATOM 6177 | OG    | OG  | . SER SER SER B B 372 372 . 86.954 114.296 5.224 1.00  |
| 2.07      | 1 . . |     |                                                        |
| ATOM 6178 | C     | C   | . SER SER SER B B 372 372 . 86.143 111.794 6.705 1.00  |
| 2.74      | 1 . . |     |                                                        |
| ATOM 6179 | O     | O   | . SER SER SER B B 372 372 . 86.961 111.160 7.378 1.00  |
| 2.94      | 1 . . |     |                                                        |
| ATOM 6180 | N     | N   | . GLY GLY GLY B B 373 373 . 85.042 112.326 7.208 1.00  |
| 2.45      | 1 . . |     |                                                        |
| ATOM 6181 | CA    | CA  | . GLY GLY GLY B B 373 373 . 84.673 112.120 8.605 1.00  |
| 2.58      | 1 . . |     |                                                        |
| ATOM 6182 | C     | C   | . GLY GLY GLY B B 373 373 . 83.521 111.164 8.533 1.00  |
| 2.00      | 1 . . |     |                                                        |
| ATOM 6183 | O     | O   | . GLY GLY GLY B B 373 373 . 82.417 111.483 8.076 1.00  |
| 2.32      | 1 . . |     |                                                        |
| ATOM 6184 | N     | N   | . GLU GLU GLU B B 374 374 . 83.771 109.938 8.957 1.00  |
| 2.22      | 1 . . |     |                                                        |
| ATOM 6185 | CA    | CA  | . GLU GLU GLU B B 374 374 . 82.686 108.933 8.853 1.00  |
| 2.47      | 1 . . |     |                                                        |
| ATOM 6186 | CB    | CB  | . GLU GLU GLU B B 374 374 . 83.141 107.716 7.988 1.00  |
| 2.35      | 1 . . |     |                                                        |
| ATOM 6187 | CG    | CG  | . GLU GLU GLU B B 374 374 . 82.622 107.895 6.537 1.00  |
| 2.11      | 1 . . |     |                                                        |
| ATOM 6188 | CD    | CD  | . GLU GLU GLU B B 374 374 . 81.129 107.818 6.398 1.00  |
| 2.66      | 1 . . |     |                                                        |
| ATOM 6189 | OE1   | OE1 | . GLU GLU GLU B B 374 374 . 80.409 107.229 7.246 1.00  |
| 2.89      | 1 . . |     |                                                        |
| ATOM 6190 | OE2   | OE2 | . GLU GLU GLU B B 374 374 . 80.644 108.327 5.318 1.00  |
| 2.50      | 1 . . |     |                                                        |
| ATOM 6191 | C     | C   | . GLU GLU GLU B B 374 374 . 82.259 108.407 10.223 1.00 |
| 2.00      | 1 . . |     |                                                        |
| ATOM 6192 | O     | O   | . GLU GLU GLU B B 374 374 . 82.728 108.880 11.249 1.00 |
| 2.95      | 1 . . |     |                                                        |
| ATOM 6193 | N     | N   | . THR THR THR B B 375 375 . 81.300 107.531 10.198 1.00 |
| 2.17      | 1 . . |     |                                                        |
| ATOM 6194 | CA    | CA  | . THR THR THR B B 375 375 . 80.896 106.831 11.435 1.00 |
| 2.01      | 1 . . |     |                                                        |
| ATOM 6195 | CB    | CB  | . THR THR THR B B 375 375 . 79.510 107.289 11.933 1.00 |
| 2.75      | 1 . . |     |                                                        |
| ATOM 6196 | OG1   | OG1 | . THR THR THR B B 375 375 . 78.494 106.740 11.073 1.00 |
| 2.00      | 1 . . |     |                                                        |
| ATOM 6197 | CG2   | CG2 | . THR THR THR B B 375 375 . 79.417 108.842 11.939 1.00 |
| 2.27      | 1 . . |     |                                                        |
| ATOM 6198 | C     | C   | . THR THR THR B B 375 375 . 80.776 105.335 11.185 1.00 |
| 2.45      | 1 . . |     |                                                        |







|           |     |       |                   |         |          |         |         |      |
|-----------|-----|-------|-------------------|---------|----------|---------|---------|------|
| ATOM 6280 | C   | C     | . GLY GLY GLY B B | 386 386 | . 70.182 | 100.109 | -5.505  | 1.00 |
| 5.75      | 1   | . . . |                   |         |          |         |         |      |
| ATOM 6281 | O   | O     | . GLY GLY GLY B B | 386 386 | . 69.288 | 99.917  | -6.340  | 1.00 |
| 6.46      | 1   | . . . |                   |         |          |         |         |      |
| ATOM 6282 | N   | N     | . LEU LEU LEU B B | 387 387 | . 71.104 | 101.080 | -5.631  | 1.00 |
| 5.41      | 1   | . . . |                   |         |          |         |         |      |
| ATOM 6283 | CA  | CA    | . LEU LEU LEU B B | 387 387 | . 71.139 | 102.016 | -6.791  | 1.00 |
| 5.08      | 1   | . . . |                   |         |          |         |         |      |
| ATOM 6284 | CB  | CB    | . LEU LEU LEU B B | 387 387 | . 71.676 | 103.387 | -6.349  | 1.00 |
| 4.97      | 1   | . . . |                   |         |          |         |         |      |
| ATOM 6285 | CG  | CG    | . LEU LEU LEU B B | 387 387 | . 70.814 | 104.148 | -5.335  | 1.00 |
| 5.99      | 1   | . . . |                   |         |          |         |         |      |
| ATOM 6286 | CD1 | CD1   | . LEU LEU LEU B B | 387 387 | . 71.355 | 105.511 | -4.984  | 1.00 |
| 5.60      | 1   | . . . |                   |         |          |         |         |      |
| ATOM 6287 | CD2 | CD2   | . LEU LEU LEU B B | 387 387 | . 69.423 | 104.274 | -5.859  | 1.00 |
| 5.99      | 1   | . . . |                   |         |          |         |         |      |
| ATOM 6288 | C   | C     | . LEU LEU LEU B B | 387 387 | . 71.914 | 101.442 | -7.995  | 1.00 |
| 5.68      | 1   | . . . |                   |         |          |         |         |      |
| ATOM 6289 | O   | O     | . LEU LEU LEU B B | 387 387 | . 71.956 | 102.053 | -9.122  | 1.00 |
| 7.54      | 1   | . . . |                   |         |          |         |         |      |
| ATOM 6290 | N   | N     | . CYS CYS CYS B B | 388 388 | . 72.549 | 100.266 | -7.796  | 1.00 |
| 6.20      | 1   | . . . |                   |         |          |         |         |      |
| ATOM 6291 | CA  | CA    | . CYS CYS CYS B B | 388 388 | . 73.259 | 99.575  | -8.906  | 1.00 |
| 8.44      | 1   | . . . |                   |         |          |         |         |      |
| ATOM 6292 | CB  | CB    | . CYS CYS CYS B B | 388 388 | . 72.232 | 99.131  | -9.950  | 1.00 |
| 7.72      | 1   | . . . |                   |         |          |         |         |      |
| ATOM 6293 | SG  | SG    | . CYS CYS CYS B B | 388 388 | . 71.069 | 97.914  | -9.412  | 1.00 |
| 18.13     | 1   | . . . |                   |         |          |         |         |      |
| ATOM 6294 | C   | C     | . CYS CYS CYS B B | 388 388 | . 74.262 | 100.447 | -9.652  | 1.00 |
| 8.45      | 1   | . . . |                   |         |          |         |         |      |
| ATOM 6295 | O   | O     | . CYS CYS CYS B B | 388 388 | . 74.356 | 100.406 | -10.915 | 1.00 |
| 10.77     | 1   | . . . |                   |         |          |         |         |      |
| ATOM 6296 | N   | N     | . THR THR THR B B | 389 389 | . 75.014 | 101.236 | -8.925  | 1.00 |
| 5.48      | 1   | . . . |                   |         |          |         |         |      |
| ATOM 6297 | CA  | CA    | . THR THR THR B B | 389 389 | . 75.833 | 102.185 | -9.639  | 1.00 |
| 4.36      | 1   | . . . |                   |         |          |         |         |      |
| ATOM 6298 | CB  | CB    | . THR THR THR B B | 389 389 | . 76.146 | 103.438 | -8.782  | 1.00 |
| 3.85      | 1   | . . . |                   |         |          |         |         |      |
| ATOM 6299 | OG1 | OG1   | . THR THR THR B B | 389 389 | . 77.265 | 103.179 | -7.913  | 1.00 |
| 3.50      | 1   | . . . |                   |         |          |         |         |      |
| ATOM 6300 | CG2 | CG2   | . THR THR THR B B | 389 389 | . 75.020 | 103.916 | -8.023  | 1.00 |
| 3.52      | 1   | . . . |                   |         |          |         |         |      |
| ATOM 6301 | C   | C     | . THR THR THR B B | 389 389 | . 77.170 | 101.591 | -10.034 | 1.00 |
| 4.72      | 1   | . . . |                   |         |          |         |         |      |
| ATOM 6302 | O   | O     | . THR THR THR B B | 389 389 | . 77.841 | 102.119 | -10.886 | 1.00 |
| 5.64      | 1   | . . . |                   |         |          |         |         |      |
| ATOM 6303 | N   | N     | . GLY GLY GLY B B | 390 390 | . 77.558 | 100.463 | -9.482  | 1.00 |
| 2.39      | 1   | . . . |                   |         |          |         |         |      |
| ATOM 6304 | CA  | CA    | . GLY GLY GLY B B | 390 390 | . 78.852 | 99.877  | -9.877  | 1.00 |
| 3.26      | 1   | . . . |                   |         |          |         |         |      |
| ATOM 6305 | C   | C     | . GLY GLY GLY B B | 390 390 | . 80.175 | 100.310 | -9.326  | 1.00 |
| 2.51      | 1   | . . . |                   |         |          |         |         |      |
| ATOM 6306 | O   | O     | . GLY GLY GLY B B | 390 390 | . 81.204 | 99.710  | -9.624  | 1.00 |
| 2.66      | 1   | . . . |                   |         |          |         |         |      |

|           |       |     |                                                         |
|-----------|-------|-----|---------------------------------------------------------|
| ATOM 6307 | N     | N   | . GLN GLN GLN B B 391 391 . 80.144 101.360 -8.526 1.00  |
| 2.55      | 1 . . |     |                                                         |
| ATOM 6308 | CA    | CA  | . GLN GLN GLN B B 391 391 . 81.404 101.916 -7.952 1.00  |
| 3.11      | 1 . . |     |                                                         |
| ATOM 6309 | CB    | CB  | . GLN GLN GLN B B 391 391 . 82.154 102.864 -8.921 1.00  |
| 3.80      | 1 . . |     |                                                         |
| ATOM 6310 | CG    | CG  | . GLN GLN GLN B B 391 391 . 81.370 103.434 -10.030 1.00 |
| 4.04      | 1 . . |     |                                                         |
| ATOM 6311 | CD    | CD  | . GLN GLN GLN B B 391 391 . 82.095 104.463 -10.863 1.00 |
| 3.58      | 1 . . |     |                                                         |
| ATOM 6312 | OE1   | OE1 | . GLN GLN GLN B B 391 391 . 83.233 104.809 -10.613 1.00 |
| 4.19      | 1 . . |     |                                                         |
| ATOM 6313 | NE2   | NE2 | . GLN GLN GLN B B 391 391 . 81.396 104.958 -11.871 1.00 |
| 5.89      | 1 . . |     |                                                         |
| ATOM 6314 | C     | C   | . GLN GLN GLN B B 391 391 . 81.095 102.637 -6.671 1.00  |
| 2.66      | 1 . . |     |                                                         |
| ATOM 6315 | O     | O   | . GLN GLN GLN B B 391 391 . 80.105 103.338 -6.533 1.00  |
| 3.56      | 1 . . |     |                                                         |
| ATOM 6316 | N     | N   | . ILE ILE ILE B B 392 392 . 81.985 102.396 -5.706 1.00  |
| 2.95      | 1 . . |     |                                                         |
| ATOM 6317 | CA    | CA  | . ILE ILE ILE B B 392 392 . 81.867 103.058 -4.415 1.00  |
| 2.55      | 1 . . |     |                                                         |
| ATOM 6318 | CB    | CB  | . ILE ILE ILE B B 392 392 . 81.125 102.209 -3.329 1.00  |
| 3.01      | 1 . . |     |                                                         |
| ATOM 6319 | CG1   | CG1 | . ILE ILE ILE B B 392 392 . 81.089 103.005 -2.005 1.00  |
| 2.49      | 1 . . |     |                                                         |
| ATOM 6320 | CD1   | CD1 | . ILE ILE ILE B B 392 392 . 80.214 102.463 -0.965 1.00  |
| 2.37      | 1 . . |     |                                                         |
| ATOM 6321 | CG2   | CG2 | . ILE ILE ILE B B 392 392 . 81.867 100.865 -3.125 1.00  |
| 4.87      | 1 . . |     |                                                         |
| ATOM 6322 | C     | C   | . ILE ILE ILE B B 392 392 . 83.284 103.396 -3.985 1.00  |
| 2.39      | 1 . . |     |                                                         |
| ATOM 6323 | O     | O   | . ILE ILE ILE B B 392 392 . 84.241 102.609 -4.186 1.00  |
| 2.68      | 1 . . |     |                                                         |
| ATOM 6324 | N     | N   | . LYS LYS LYS B B 393 393 . 83.474 104.591 -3.399 1.00  |
| 2.73      | 1 . . |     |                                                         |
| ATOM 6325 | CA    | CA  | . LYS LYS LYS B B 393 393 . 84.639 104.877 -2.640 1.00  |
| 2.00      | 1 . . |     |                                                         |
| ATOM 6326 | CB    | CB  | . LYS LYS LYS B B 393 393 . 85.483 106.054 -3.208 1.00  |
| 2.88      | 1 . . |     |                                                         |
| ATOM 6327 | CG    | CG  | . LYS LYS LYS B B 393 393 . 84.866 107.449 -3.019 1.00  |
| 2.74      | 1 . . |     |                                                         |
| ATOM 6328 | CD    | CD  | . LYS LYS LYS B B 393 393 . 85.865 108.502 -3.570 1.00  |
| 3.60      | 1 . . |     |                                                         |
| ATOM 6329 | CE    | CE  | . LYS LYS LYS B B 393 393 . 85.577 109.882 -2.943 1.00  |
| 3.60      | 1 . . |     |                                                         |
| ATOM 6330 | NZ    | NZ  | . LYS LYS LYS B B 393 393 . 86.535 110.905 -3.445 1.00  |
| 3.49      | 1 . . |     |                                                         |
| ATOM 6331 | C     | C   | . LYS LYS LYS B B 393 393 . 84.283 105.100 -1.168 1.00  |
| 3.04      | 1 . . |     |                                                         |
| ATOM 6332 | O     | O   | . LYS LYS LYS B B 393 393 . 83.423 105.900 -0.860 1.00  |
| 2.06      | 1 . . |     |                                                         |
| ATOM 6333 | N     | N   | . THR THR THR B B 394 394 . 84.933 104.350 -0.279 1.00  |
| 2.75      | 1 . . |     |                                                         |

|           |       |     |                             |        |         |       |      |
|-----------|-------|-----|-----------------------------|--------|---------|-------|------|
| ATOM 6334 | CA    | CA  | . THR THR THR B B 394 394 . | 84.685 | 104.528 | 1.154 | 1.00 |
| 2.00      | 1 . . |     |                             |        |         |       |      |
| ATOM 6335 | CB    | CB  | . THR THR THR B B 394 394 . | 83.399 | 103.781 | 1.532 | 1.00 |
| 2.33      | 1 . . |     |                             |        |         |       |      |
| ATOM 6336 | OG1   | OG1 | . THR THR THR B B 394 394 . | 83.058 | 104.068 | 2.907 | 1.00 |
| 2.33      | 1 . . |     |                             |        |         |       |      |
| ATOM 6337 | CG2   | CG2 | . THR THR THR B B 394 394 . | 83.483 | 102.237 | 1.335 | 1.00 |
| 2.89      | 1 . . |     |                             |        |         |       |      |
| ATOM 6338 | C     | C   | . THR THR THR B B 394 394 . | 85.907 | 104.223 | 2.004 | 1.00 |
| 2.05      | 1 . . |     |                             |        |         |       |      |
| ATOM 6339 | O     | O   | . THR THR THR B B 394 394 . | 85.758 | 103.736 | 3.105 | 1.00 |
| 2.06      | 1 . . |     |                             |        |         |       |      |
| ATOM 6340 | N     | N   | . GLY GLY GLY B B 395 395 . | 87.056 | 104.593 | 1.499 | 1.00 |
| 2.01      | 1 . . |     |                             |        |         |       |      |
| ATOM 6341 | CA    | CA  | . GLY GLY GLY B B 395 395 . | 88.298 | 104.565 | 2.262 | 1.00 |
| 2.76      | 1 . . |     |                             |        |         |       |      |
| ATOM 6342 | C     | C   | . GLY GLY GLY B B 395 395 . | 89.352 | 103.555 | 1.836 | 1.00 |
| 2.54      | 1 . . |     |                             |        |         |       |      |
| ATOM 6343 | O     | O   | . GLY GLY GLY B B 395 395 . | 89.094 | 102.658 | 1.026 | 1.00 |
| 2.87      | 1 . . |     |                             |        |         |       |      |
| ATOM 6344 | N     | N   | . ALA ALA ALA B B 396 396 . | 90.586 | 103.751 | 2.337 | 1.00 |
| 2.12      | 1 . . |     |                             |        |         |       |      |
| ATOM 6345 | CA    | CA  | . ALA ALA ALA B B 396 396 . | 91.556 | 102.637 | 2.390 | 1.00 |
| 2.60      | 1 . . |     |                             |        |         |       |      |
| ATOM 6346 | CB    | CB  | . ALA ALA ALA B B 396 396 . | 92.851 | 103.027 | 3.095 | 1.00 |
| 2.93      | 1 . . |     |                             |        |         |       |      |
| ATOM 6347 | C     | C   | . ALA ALA ALA B B 396 396 . | 90.930 | 101.457 | 3.110 | 1.00 |
| 2.44      | 1 . . |     |                             |        |         |       |      |
| ATOM 6348 | O     | O   | . ALA ALA ALA B B 396 396 . | 89.934 | 101.629 | 3.814 | 1.00 |
| 2.03      | 1 . . |     |                             |        |         |       |      |
| ATOM 6349 | N     | N   | . PRO PRO PRO B B 397 397 . | 91.497 | 100.217 | 2.936 | 1.00 |
| 2.44      | 1 . . |     |                             |        |         |       |      |
| ATOM 6350 | CA    | CA  | . PRO PRO PRO B B 397 397 . | 91.001 | 99.094  | 3.737 | 1.00 |
| 2.03      | 1 . . |     |                             |        |         |       |      |
| ATOM 6351 | CB    | CB  | . PRO PRO PRO B B 397 397 . | 91.541 | 97.896  | 2.959 | 1.00 |
| 4.05      | 1 . . |     |                             |        |         |       |      |
| ATOM 6352 | CG    | CG  | . PRO PRO PRO B B 397 397 . | 92.757 | 98.354  | 2.282 | 1.00 |
| 2.00      | 1 . . |     |                             |        |         |       |      |
| ATOM 6353 | CD    | CD  | . PRO PRO PRO B B 397 397 . | 92.532 | 99.803  | 1.963 | 1.00 |
| 2.61      | 1 . . |     |                             |        |         |       |      |
| ATOM 6354 | C     | C   | . PRO PRO PRO B B 397 397 . | 91.662 | 99.155  | 5.141 | 1.00 |
| 2.95      | 1 . . |     |                             |        |         |       |      |
| ATOM 6355 | O     | O   | . PRO PRO PRO B B 397 397 . | 92.357 | 98.208  | 5.581 | 1.00 |
| 3.03      | 1 . . |     |                             |        |         |       |      |
| ATOM 6356 | N     | N   | . CYS CYS CYS B B 398 398 . | 91.399 | 100.282 | 5.824 | 1.00 |
| 2.10      | 1 . . |     |                             |        |         |       |      |
| ATOM 6357 | CA    | CA  | . CYS CYS CYS B B 398 398 . | 92.021 | 100.565 | 7.088 | 1.00 |
| 2.35      | 1 . . |     |                             |        |         |       |      |
| ATOM 6358 | CB    | CB  | . CYS CYS CYS B B 398 398 . | 93.429 | 101.088 | 6.851 | 1.00 |
| 2.51      | 1 . . |     |                             |        |         |       |      |
| ATOM 6359 | SG    | SG  | . CYS CYS CYS B B 398 398 . | 94.274 | 101.655 | 8.354 | 1.00 |
| 2.58      | 1 . . |     |                             |        |         |       |      |
| ATOM 6360 | C     | C   | . CYS CYS CYS B B 398 398 . | 91.172 | 101.620 | 7.779 | 1.00 |
| 3.91      | 1 . . |     |                             |        |         |       |      |



|           |       |     |                             |        |         |        |      |
|-----------|-------|-----|-----------------------------|--------|---------|--------|------|
| ATOM 6361 | O     | O   | . CYS CYS CYS B B 398 398 . | 90.692 | 102.550 | 7.129  | 1.00 |
| 2.52      | 1 . . |     |                             |        |         |        |      |
| ATOM 6362 | N     | N   | . ARG ARG ARG B B 399 399 . | 90.974 | 101.400 | 9.051  | 1.00 |
| 2.00      | 1 . . |     |                             |        |         |        |      |
| ATOM 6363 | CA    | CA  | . ARG ARG ARG B B 399 399 . | 90.035 | 102.191 | 9.945  | 1.00 |
| 2.27      | 1 . . |     |                             |        |         |        |      |
| ATOM 6364 | CB    | CB  | . ARG ARG ARG B B 399 399 . | 90.139 | 103.708 | 9.701  | 1.00 |
| 2.00      | 1 . . |     |                             |        |         |        |      |
| ATOM 6365 | CG    | CG  | . ARG ARG ARG B B 399 399 . | 91.604 | 104.223 | 9.856  | 1.00 |
| 2.80      | 1 . . |     |                             |        |         |        |      |
| ATOM 6366 | CD    | CD  | . ARG ARG ARG B B 399 399 . | 91.789 | 105.741 | 9.462  | 1.00 |
| 3.39      | 1 . . |     |                             |        |         |        |      |
| ATOM 6367 | NE    | NE  | . ARG ARG ARG B B 399 399 . | 90.783 | 106.560 | 10.148 | 1.00 |
| 2.99      | 1 . . |     |                             |        |         |        |      |
| ATOM 6368 | CZ    | CZ  | . ARG ARG ARG B B 399 399 . | 91.079 | 107.720 | 10.759 | 1.00 |
| 3.52      | 1 . . |     |                             |        |         |        |      |
| ATOM 6369 | NH1   | NH1 | . ARG ARG ARG B B 399 399 . | 92.363 | 108.169 | 10.727 | 1.00 |
| 4.04      | 1 . . |     |                             |        |         |        |      |
| ATOM 6370 | NH2   | NH2 | . ARG ARG ARG B B 399 399 . | 90.081 | 108.433 | 11.359 | 1.00 |
| 3.11      | 1 . . |     |                             |        |         |        |      |
| ATOM 6371 | C     | C   | . ARG ARG ARG B B 399 399 . | 88.583 | 101.700 | 9.748  | 1.00 |
| 2.00      | 1 . . |     |                             |        |         |        |      |
| ATOM 6372 | O     | O   | . ARG ARG ARG B B 399 399 . | 88.055 | 101.666 | 8.675  | 1.00 |
| 2.00      | 1 . . |     |                             |        |         |        |      |
| ATOM 6373 | N     | N   | . SER SER SER B B 400 400 . | 87.901 | 101.315 | 10.836 | 1.00 |
| 2.00      | 1 . . |     |                             |        |         |        |      |
| ATOM 6374 | CA    | CA  | . SER SER SER B B 400 400 . | 86.675 | 100.578 | 10.636 | 1.00 |
| 2.00      | 1 . . |     |                             |        |         |        |      |
| ATOM 6375 | CB    | CB  | . SER SER SER B B 400 400 . | 86.344 | 99.682  | 11.845 | 1.00 |
| 2.00      | 1 . . |     |                             |        |         |        |      |
| ATOM 6376 | OG    | OG  | . SER SER SER B B 400 400 . | 87.329 | 98.665  | 12.106 | 1.00 |
| 2.50      | 1 . . |     |                             |        |         |        |      |
| ATOM 6377 | C     | C   | . SER SER SER B B 400 400 . | 85.478 | 101.450 | 10.305 | 1.00 |
| 2.00      | 1 . . |     |                             |        |         |        |      |
| ATOM 6378 | O     | O   | . SER SER SER B B 400 400 . | 84.462 | 100.951 | 9.930  | 1.00 |
| 2.00      | 1 . . |     |                             |        |         |        |      |
| ATOM 6379 | N     | N   | . GLU GLU GLU B B 401 401 . | 85.639 | 102.769 | 10.309 | 1.00 |
| 2.00      | 1 . . |     |                             |        |         |        |      |
| ATOM 6380 | CA    | CA  | . GLU GLU GLU B B 401 401 . | 84.558 | 103.540 | 9.674  | 1.00 |
| 2.00      | 1 . . |     |                             |        |         |        |      |
| ATOM 6381 | CB    | CB  | . GLU GLU GLU B B 401 401 . | 84.688 | 105.001 | 10.037 | 1.00 |
| 2.35      | 1 . . |     |                             |        |         |        |      |
| ATOM 6382 | CG    | CG  | . GLU GLU GLU B B 401 401 . | 85.763 | 105.732 | 9.361  | 1.00 |
| 3.09      | 1 . . |     |                             |        |         |        |      |
| ATOM 6383 | CD    | CD  | . GLU GLU GLU B B 401 401 . | 87.085 | 105.654 | 10.043 | 1.00 |
| 2.74      | 1 . . |     |                             |        |         |        |      |
| ATOM 6384 | OE1   | OE1 | . GLU GLU GLU B B 401 401 . | 87.206 | 104.917 | 11.026 | 1.00 |
| 2.01      | 1 . . |     |                             |        |         |        |      |
| ATOM 6385 | OE2   | OE2 | . GLU GLU GLU B B 401 401 . | 88.070 | 106.354 | 9.601  | 1.00 |
| 2.00      | 1 . . |     |                             |        |         |        |      |
| ATOM 6386 | C     | C   | . GLU GLU GLU B B 401 401 . | 84.589 | 103.337 | 8.120  | 1.00 |
| 2.24      | 1 . . |     |                             |        |         |        |      |
| ATOM 6387 | O     | O   | . GLU GLU GLU B B 401 401 . | 83.585 | 103.651 | 7.451  | 1.00 |
| 2.00      | 1 . . |     |                             |        |         |        |      |

|           |       |     |                             |        |         |       |      |
|-----------|-------|-----|-----------------------------|--------|---------|-------|------|
| ATOM 6388 | N     | N   | . ARG ARG ARG B B 402 402 . | 85.688 | 102.768 | 7.673 | 1.00 |
| 2.00      | 1 . . |     |                             |        |         |       |      |
| ATOM 6389 | CA    | CA  | . ARG ARG ARG B B 402 402 . | 85.816 | 102.369 | 6.246 | 1.00 |
| 2.19      | 1 . . |     |                             |        |         |       |      |
| ATOM 6390 | CB    | CB  | . ARG ARG ARG B B 402 402 . | 87.198 | 102.635 | 5.703 | 1.00 |
| 2.70      | 1 . . |     |                             |        |         |       |      |
| ATOM 6391 | CG    | CG  | . ARG ARG ARG B B 402 402 . | 87.867 | 103.990 | 6.048 | 1.00 |
| 2.64      | 1 . . |     |                             |        |         |       |      |
| ATOM 6392 | CD    | CD  | . ARG ARG ARG B B 402 402 . | 87.053 | 105.239 | 5.663 | 1.00 |
| 2.12      | 1 . . |     |                             |        |         |       |      |
| ATOM 6393 | NE    | NE  | . ARG ARG ARG B B 402 402 . | 87.387 | 106.324 | 6.557 | 1.00 |
| 2.00      | 1 . . |     |                             |        |         |       |      |
| ATOM 6394 | CZ    | CZ  | . ARG ARG ARG B B 402 402 . | 86.853 | 107.546 | 6.549 | 1.00 |
| 2.00      | 1 . . |     |                             |        |         |       |      |
| ATOM 6395 | NH1   | NH1 | . ARG ARG ARG B B 402 402 . | 85.974 | 107.924 | 5.628 | 1.00 |
| 3.09      | 1 . . |     |                             |        |         |       |      |
| ATOM 6396 | NH2   | NH2 | . ARG ARG ARG B B 402 402 . | 87.180 | 108.347 | 7.554 | 1.00 |
| 2.33      | 1 . . |     |                             |        |         |       |      |
| ATOM 6397 | C     | C   | . ARG ARG ARG B B 402 402 . | 85.441 | 100.900 | 6.050 | 1.00 |
| 2.02      | 1 . . |     |                             |        |         |       |      |
| ATOM 6398 | O     | O   | . ARG ARG ARG B B 402 402 . | 84.538 | 100.553 | 5.282 | 1.00 |
| 2.00      | 1 . . |     |                             |        |         |       |      |
| ATOM 6399 | N     | N   | . LEU LEU LEU B B 403 403 . | 86.117 | 100.037 | 6.816 | 1.00 |
| 2.55      | 1 . . |     |                             |        |         |       |      |
| ATOM 6400 | CA    | CA  | . LEU LEU LEU B B 403 403 . | 85.823 | 98.603  | 6.756 | 1.00 |
| 2.03      | 1 . . |     |                             |        |         |       |      |
| ATOM 6401 | CB    | CB  | . LEU LEU LEU B B 403 403 . | 86.741 | 97.756  | 7.650 | 1.00 |
| 2.00      | 1 . . |     |                             |        |         |       |      |
| ATOM 6402 | CG    | CG  | . LEU LEU LEU B B 403 403 . | 88.163 | 97.462  | 7.242 | 1.00 |
| 2.43      | 1 . . |     |                             |        |         |       |      |
| ATOM 6403 | CD1   | CD1 | . LEU LEU LEU B B 403 403 . | 88.308 | 97.223  | 5.702 | 1.00 |
| 2.00      | 1 . . |     |                             |        |         |       |      |
| ATOM 6404 | CD2   | CD2 | . LEU LEU LEU B B 403 403 . | 89.088 | 98.581  | 7.744 | 1.00 |
| 2.44      | 1 . . |     |                             |        |         |       |      |
| ATOM 6405 | C     | C   | . LEU LEU LEU B B 403 403 . | 84.438 | 98.255  | 7.111 | 1.00 |
| 2.11      | 1 . . |     |                             |        |         |       |      |
| ATOM 6406 | O     | O   | . LEU LEU LEU B B 403 403 . | 83.921 | 97.274  | 6.541 | 1.00 |
| 2.00      | 1 . . |     |                             |        |         |       |      |
| ATOM 6407 | N     | N   | . ALA ALA ALA B B 404 404 . | 83.800 | 99.029  | 7.993 | 1.00 |
| 2.00      | 1 . . |     |                             |        |         |       |      |
| ATOM 6408 | CA    | CA  | . ALA ALA ALA B B 404 404 . | 82.358 | 98.688  | 8.219 | 1.00 |
| 2.18      | 1 . . |     |                             |        |         |       |      |
| ATOM 6409 | CB    | CB  | . ALA ALA ALA B B 404 404 . | 81.746 | 99.551  | 9.253 | 1.00 |
| 2.96      | 1 . . |     |                             |        |         |       |      |
| ATOM 6410 | C     | C   | . ALA ALA ALA B B 404 404 . | 81.532 | 98.678  | 6.949 | 1.00 |
| 3.01      | 1 . . |     |                             |        |         |       |      |
| ATOM 6411 | O     | O   | . ALA ALA ALA B B 404 404 . | 80.676 | 97.810  | 6.768 | 1.00 |
| 2.22      | 1 . . |     |                             |        |         |       |      |
| ATOM 6412 | N     | N   | . LYS LYS LYS B B 405 405 . | 81.819 | 99.600  | 6.038 | 1.00 |
| 2.00      | 1 . . |     |                             |        |         |       |      |
| ATOM 6413 | CA    | CA  | . LYS LYS LYS B B 405 405 . | 81.094 | 99.547  | 4.732 | 1.00 |
| 2.00      | 1 . . |     |                             |        |         |       |      |
| ATOM 6414 | CB    | CB  | . LYS LYS LYS B B 405 405 . | 81.206 | 100.859 | 3.907 | 1.00 |
| 2.31      | 1 . . |     |                             |        |         |       |      |





|           |       |     |                   |         |          |        |        |      |
|-----------|-------|-----|-------------------|---------|----------|--------|--------|------|
| ATOM 6469 | CG    | CG  | . ARG ARG ARG B B | 411 411 | . 78.208 | 90.893 | 6.043  | 1.00 |
| 3.16      | 1 . . |     |                   |         |          |        |        |      |
| ATOM 6470 | CD    | CD  | . ARG ARG ARG B B | 411 411 | . 77.526 | 91.381 | 7.422  | 1.00 |
| 2.26      | 1 . . |     |                   |         |          |        |        |      |
| ATOM 6471 | NE    | NE  | . ARG ARG ARG B B | 411 411 | . 78.637 | 91.689 | 8.314  | 1.00 |
| 2.73      | 1 . . |     |                   |         |          |        |        |      |
| ATOM 6472 | CZ    | CZ  | . ARG ARG ARG B B | 411 411 | . 79.101 | 92.923 | 8.569  | 1.00 |
| 3.45      | 1 . . |     |                   |         |          |        |        |      |
| ATOM 6473 | NH1   | NH1 | . ARG ARG ARG B B | 411 411 | . 78.489 | 93.995 | 8.042  | 1.00 |
| 2.50      | 1 . . |     |                   |         |          |        |        |      |
| ATOM 6474 | NH2   | NH2 | . ARG ARG ARG B B | 411 411 | . 80.191 | 93.110 | 9.368  | 1.00 |
| 3.05      | 1 . . |     |                   |         |          |        |        |      |
| ATOM 6475 | C     | C   | . ARG ARG ARG B B | 411 411 | . 76.561 | 90.437 | 2.529  | 1.00 |
| 3.13      | 1 . . |     |                   |         |          |        |        |      |
| ATOM 6476 | O     | O   | . ARG ARG ARG B B | 411 411 | . 75.823 | 89.472 | 2.361  | 1.00 |
| 3.97      | 1 . . |     |                   |         |          |        |        |      |
| ATOM 6477 | N     | N   | . ILE ILE ILE B B | 412 412 | . 76.430 | 91.577 | 1.831  | 1.00 |
| 2.99      | 1 . . |     |                   |         |          |        |        |      |
| ATOM 6478 | CA    | CA  | . ILE ILE ILE B B | 412 412 | . 75.362 | 91.695 | 0.906  | 1.00 |
| 3.63      | 1 . . |     |                   |         |          |        |        |      |
| ATOM 6479 | CB    | CB  | . ILE ILE ILE B B | 412 412 | . 75.251 | 93.183 | 0.385  | 1.00 |
| 3.00      | 1 . . |     |                   |         |          |        |        |      |
| ATOM 6480 | CG1   | CG1 | . ILE ILE ILE B B | 412 412 | . 74.694 | 94.050 | 1.476  | 1.00 |
| 2.70      | 1 . . |     |                   |         |          |        |        |      |
| ATOM 6481 | CD1   | CD1 | . ILE ILE ILE B B | 412 412 | . 74.830 | 95.598 | 1.137  | 1.00 |
| 2.00      | 1 . . |     |                   |         |          |        |        |      |
| ATOM 6482 | CG2   | CG2 | . ILE ILE ILE B B | 412 412 | . 74.350 | 93.238 | -0.879 | 1.00 |
| 5.83      | 1 . . |     |                   |         |          |        |        |      |
| ATOM 6483 | C     | C   | . ILE ILE ILE B B | 412 412 | . 75.654 | 90.729 | -0.254 | 1.00 |
| 3.94      | 1 . . |     |                   |         |          |        |        |      |
| ATOM 6484 | O     | O   | . ILE ILE ILE B B | 412 412 | . 74.715 | 90.034 | -0.684 | 1.00 |
| 5.03      | 1 . . |     |                   |         |          |        |        |      |
| ATOM 6485 | N     | N   | . GLU GLU GLU B B | 413 413 | . 76.913 | 90.655 | -0.704 | 1.00 |
| 3.20      | 1 . . |     |                   |         |          |        |        |      |
| ATOM 6486 | CA    | CA  | . GLU GLU GLU B B | 413 413 | . 77.298 | 89.702 | -1.737 | 1.00 |
| 3.92      | 1 . . |     |                   |         |          |        |        |      |
| ATOM 6487 | CB    | CB  | . GLU GLU GLU B B | 413 413 | . 78.825 | 89.836 | -2.047 | 1.00 |
| 3.67      | 1 . . |     |                   |         |          |        |        |      |
| ATOM 6488 | CG    | CG  | . GLU GLU GLU B B | 413 413 | . 79.187 | 88.936 | -3.318 | 1.00 |
| 5.20      | 1 . . |     |                   |         |          |        |        |      |
| ATOM 6489 | CD    | CD  | . GLU GLU GLU B B | 413 413 | . 80.562 | 89.116 | -3.820 | 1.00 |
| 6.97      | 1 . . |     |                   |         |          |        |        |      |
| ATOM 6490 | OE1   | OE1 | . GLU GLU GLU B B | 413 413 | . 81.532 | 88.781 | -3.128 | 1.00 |
| 8.80      | 1 . . |     |                   |         |          |        |        |      |
| ATOM 6491 | OE2   | OE2 | . GLU GLU GLU B B | 413 413 | . 80.672 | 89.619 | -4.954 | 1.00 |
| 8.72      | 1 . . |     |                   |         |          |        |        |      |
| ATOM 6492 | C     | C   | . GLU GLU GLU B B | 413 413 | . 76.990 | 88.232 | -1.341 | 1.00 |
| 5.33      | 1 . . |     |                   |         |          |        |        |      |
| ATOM 6493 | O     | O   | . GLU GLU GLU B B | 413 413 | . 76.462 | 87.442 | -2.131 | 1.00 |
| 5.39      | 1 . . |     |                   |         |          |        |        |      |
| ATOM 6494 | N     | N   | . GLU GLU GLU B B | 414 414 | . 77.336 | 87.882 | -0.114 | 1.00 |
| 5.85      | 1 . . |     |                   |         |          |        |        |      |
| ATOM 6495 | CA    | CA  | . GLU GLU GLU B B | 414 414 | . 77.063 | 86.544 | 0.355  | 1.00 |
| 5.89      | 1 . . |     |                   |         |          |        |        |      |

|           |       |     |                   |         |          |        |        |      |
|-----------|-------|-----|-------------------|---------|----------|--------|--------|------|
| ATOM 6496 | CB    | CB  | . GLU GLU GLU B B | 414 414 | . 77.576 | 86.433 | 1.793  | 1.00 |
| 5.96      | 1 . . |     |                   |         |          |        |        |      |
| ATOM 6497 | CG    | CG  | . GLU GLU GLU B B | 414 414 | . 77.412 | 85.144 | 2.526  | 1.00 |
| 9.04      | 1 . . |     |                   |         |          |        |        |      |
| ATOM 6498 | CD    | CD  | . GLU GLU GLU B B | 414 414 | . 77.893 | 85.302 | 3.954  | 1.00 |
| 10.29     | 1 . . |     |                   |         |          |        |        |      |
| ATOM 6499 | OE1   | OE1 | . GLU GLU GLU B B | 414 414 | . 79.087 | 85.738 | 4.123  | 1.00 |
| 13.48     | 1 . . |     |                   |         |          |        |        |      |
| ATOM 6500 | OE2   | OE2 | . GLU GLU GLU B B | 414 414 | . 77.103 | 84.978 | 4.895  | 1.00 |
| 10.90     | 1 . . |     |                   |         |          |        |        |      |
| ATOM 6501 | C     | C   | . GLU GLU GLU B B | 414 414 | . 75.568 | 86.318 | 0.362  | 1.00 |
| 7.33      | 1 . . |     |                   |         |          |        |        |      |
| ATOM 6502 | O     | O   | . GLU GLU GLU B B | 414 414 | . 75.107 | 85.246 | 0.029  | 1.00 |
| 9.14      | 1 . . |     |                   |         |          |        |        |      |
| ATOM 6503 | N     | N   | . GLU GLU GLU B B | 415 415 | . 74.813 | 87.364 | 0.715  | 1.00 |
| 10.10     | 1 . . |     |                   |         |          |        |        |      |
| ATOM 6504 | CA    | CA  | . GLU GLU GLU B B | 415 415 | . 73.386 | 87.270 | 0.875  | 1.00 |
| 10.63     | 1 . . |     |                   |         |          |        |        |      |
| ATOM 6505 | CB    | CB  | . GLU GLU GLU B B | 415 415 | . 72.901 | 88.568 | 1.497  | 1.00 |
| 11.81     | 1 . . |     |                   |         |          |        |        |      |
| ATOM 6506 | CG    | CG  | . GLU GLU GLU B B | 415 415 | . 71.383 | 88.692 | 1.633  | 1.00 |
| 16.90     | 1 . . |     |                   |         |          |        |        |      |
| ATOM 6507 | CD    | CD  | . GLU GLU GLU B B | 415 415 | . 70.925 | 88.199 | 2.946  | 1.00 |
| 23.12     | 1 . . |     |                   |         |          |        |        |      |
| ATOM 6508 | OE1   | OE1 | . GLU GLU GLU B B | 415 415 | . 71.363 | 88.801 | 3.966  | 1.00 |
| 26.42     | 1 . . |     |                   |         |          |        |        |      |
| ATOM 6509 | OE2   | OE2 | . GLU GLU GLU B B | 415 415 | . 70.116 | 87.245 | 2.959  | 1.00 |
| 26.22     | 1 . . |     |                   |         |          |        |        |      |
| ATOM 6510 | C     | C   | . GLU GLU GLU B B | 415 415 | . 72.706 | 87.023 | -0.462 | 1.00 |
| 12.77     | 1 . . |     |                   |         |          |        |        |      |
| ATOM 6511 | O     | O   | . GLU GLU GLU B B | 415 415 | . 71.718 | 86.227 | -0.574 | 1.00 |
| 13.57     | 1 . . |     |                   |         |          |        |        |      |
| ATOM 6512 | N     | N   | . LEU LEU LEU B B | 416 416 | . 73.221 | 87.675 | -1.504 | 1.00 |
| 14.36     | 1 . . |     |                   |         |          |        |        |      |
| ATOM 6513 | CA    | CA  | . LEU LEU LEU B B | 416 416 | . 72.583 | 87.557 | -2.832 | 1.00 |
| 16.82     | 1 . . |     |                   |         |          |        |        |      |
| ATOM 6514 | CB    | CB  | . LEU LEU LEU B B | 416 416 | . 73.105 | 88.635 | -3.772 | 1.00 |
| 15.53     | 1 . . |     |                   |         |          |        |        |      |
| ATOM 6515 | CG    | CG  | . LEU LEU LEU B B | 416 416 | . 72.483 | 89.989 | -3.497 | 1.00 |
| 15.21     | 1 . . |     |                   |         |          |        |        |      |
| ATOM 6516 | CD1   | CD1 | . LEU LEU LEU B B | 416 416 | . 73.341 | 91.133 | -4.057 | 1.00 |
| 14.37     | 1 . . |     |                   |         |          |        |        |      |
| ATOM 6517 | CD2   | CD2 | . LEU LEU LEU B B | 416 416 | . 71.036 | 90.005 | -4.016 | 1.00 |
| 16.49     | 1 . . |     |                   |         |          |        |        |      |
| ATOM 6518 | C     | C   | . LEU LEU LEU B B | 416 416 | . 72.840 | 86.169 | -3.399 | 1.00 |
| 19.03     | 1 . . |     |                   |         |          |        |        |      |
| ATOM 6519 | O     | O   | . LEU LEU LEU B B | 416 416 | . 72.216 | 85.761 | -4.386 | 1.00 |
| 20.58     | 1 . . |     |                   |         |          |        |        |      |
| ATOM 6520 | N     | N   | . GLY GLY GLY B B | 417 417 | . 73.741 | 85.432 | -2.752 | 1.00 |
| 21.56     | 1 . . |     |                   |         |          |        |        |      |
| ATOM 6521 | CA    | CA  | . GLY GLY GLY B B | 417 417 | . 74.109 | 84.084 | -3.186 | 1.00 |
| 24.47     | 1 . . |     |                   |         |          |        |        |      |
| ATOM 6522 | C     | C   | . GLY GLY GLY B B | 417 417 | . 74.393 | 83.983 | -4.677 | 1.00 |
| 26.34     | 1 . . |     |                   |         |          |        |        |      |

|           |       |     |                   |         |          |        |         |      |
|-----------|-------|-----|-------------------|---------|----------|--------|---------|------|
| ATOM 6523 | O     | O   | . GLY GLY GLY B B | 417 417 | . 75.243 | 84.696 | -5.201  | 1.00 |
| 25.55     | 1 . . |     |                   |         |          |        |         |      |
| ATOM 6524 | N     | N   | . ASP ASP ASP B B | 418 418 | . 73.688 | 83.050 | -5.320  | 1.00 |
| 29.19     | 1 . . |     |                   |         |          |        |         |      |
| ATOM 6525 | CA    | CA  | . ASP ASP ASP B B | 418 418 | . 73.722 | 82.839 | -6.768  | 1.00 |
| 31.44     | 1 . . |     |                   |         |          |        |         |      |
| ATOM 6526 | CB    | CB  | . ASP ASP ASP B B | 418 418 | . 72.716 | 81.739 | -7.136  | 1.00 |
| 32.21     | 1 . . |     |                   |         |          |        |         |      |
| ATOM 6527 | CG    | CG  | . ASP ASP ASP B B | 418 418 | . 73.373 | 80.366 | -7.253  | 1.00 |
| 34.75     | 1 . . |     |                   |         |          |        |         |      |
| ATOM 6528 | OD1   | OD1 | . ASP ASP ASP B B | 418 418 | . 72.686 | 79.319 | -7.084  | 1.00 |
| 34.95     | 1 . . |     |                   |         |          |        |         |      |
| ATOM 6529 | OD2   | OD2 | . ASP ASP ASP B B | 418 418 | . 74.593 | 80.348 | -7.523  | 1.00 |
| 37.87     | 1 . . |     |                   |         |          |        |         |      |
| ATOM 6530 | C     | C   | . ASP ASP ASP B B | 418 418 | . 73.449 | 84.090 | -7.627  | 1.00 |
| 31.39     | 1 . . |     |                   |         |          |        |         |      |
| ATOM 6531 | O     | O   | . ASP ASP ASP B B | 418 418 | . 74.020 | 84.231 | -8.720  | 1.00 |
| 32.62     | 1 . . |     |                   |         |          |        |         |      |
| ATOM 6532 | N     | N   | . GLU GLU GLU B B | 419 419 | . 72.568 | 84.965 | -7.128  | 1.00 |
| 30.47     | 1 . . |     |                   |         |          |        |         |      |
| ATOM 6533 | CA    | CA  | . GLU GLU GLU B B | 419 419 | . 72.148 | 86.208 | -7.796  | 1.00 |
| 29.04     | 1 . . |     |                   |         |          |        |         |      |
| ATOM 6534 | CB    | CB  | . GLU GLU GLU B B | 419 419 | . 70.929 | 86.799 | -7.082  | 1.00 |
| 30.28     | 1 . . |     |                   |         |          |        |         |      |
| ATOM 6535 | CG    | CG  | . GLU GLU GLU B B | 419 419 | . 69.544 | 86.219 | -7.401  | 1.00 |
| 33.87     | 1 . . |     |                   |         |          |        |         |      |
| ATOM 6536 | CD    | CD  | . GLU GLU GLU B B | 419 419 | . 68.527 | 87.325 | -7.663  | 1.00 |
| 39.55     | 1 . . |     |                   |         |          |        |         |      |
| ATOM 6537 | OE1   | OE1 | . GLU GLU GLU B B | 419 419 | . 68.310 | 88.178 | -6.769  | 1.00 |
| 41.78     | 1 . . |     |                   |         |          |        |         |      |
| ATOM 6538 | OE2   | OE2 | . GLU GLU GLU B B | 419 419 | . 67.959 | 87.372 | -8.781  | 1.00 |
| 41.23     | 1 . . |     |                   |         |          |        |         |      |
| ATOM 6539 | C     | C   | . GLU GLU GLU B B | 419 419 | . 73.228 | 87.320 | -7.880  | 1.00 |
| 26.97     | 1 . . |     |                   |         |          |        |         |      |
| ATOM 6540 | O     | O   | . GLU GLU GLU B B | 419 419 | . 73.041 | 88.318 | -8.612  | 1.00 |
| 26.43     | 1 . . |     |                   |         |          |        |         |      |
| ATOM 6541 | N     | N   | . ALA ALA ALA B B | 420 420 | . 74.317 | 87.191 | -7.117  | 1.00 |
| 23.69     | 1 . . |     |                   |         |          |        |         |      |
| ATOM 6542 | CA    | CA  | . ALA ALA ALA B B | 420 420 | . 75.383 | 88.210 | -7.122  | 1.00 |
| 21.65     | 1 . . |     |                   |         |          |        |         |      |
| ATOM 6543 | CB    | CB  | . ALA ALA ALA B B | 420 420 | . 76.323 | 88.042 | -5.876  | 1.00 |
| 21.61     | 1 . . |     |                   |         |          |        |         |      |
| ATOM 6544 | C     | C   | . ALA ALA ALA B B | 420 420 | . 76.217 | 88.334 | -8.420  | 1.00 |
| 20.65     | 1 . . |     |                   |         |          |        |         |      |
| ATOM 6545 | O     | O   | . ALA ALA ALA B B | 420 420 | . 76.916 | 87.382 | -8.849  | 1.00 |
| 21.73     | 1 . . |     |                   |         |          |        |         |      |
| ATOM 6546 | N     | N   | . ARG ARG ARG B B | 421 421 | . 76.155 | 89.519 | -9.036  | 1.00 |
| 18.78     | 1 . . |     |                   |         |          |        |         |      |
| ATOM 6547 | CA    | CA  | . ARG ARG ARG B B | 421 421 | . 77.116 | 89.907 | -10.087 | 1.00 |
| 17.94     | 1 . . |     |                   |         |          |        |         |      |
| ATOM 6548 | CB    | CB  | . ARG ARG ARG B B | 421 421 | . 76.426 | 90.306 | -11.388 | 1.00 |
| 18.74     | 1 . . |     |                   |         |          |        |         |      |
| ATOM 6549 | CG    | CG  | . ARG ARG ARG B B | 421 421 | . 74.963 | 89.974 | -11.523 | 1.00 |
| 23.29     | 1 . . |     |                   |         |          |        |         |      |

|           |       |     |                   |         |          |        |         |      |
|-----------|-------|-----|-------------------|---------|----------|--------|---------|------|
| ATOM 6550 | CD    | CD  | . ARG ARG ARG B B | 421 421 | . 74.175 | 91.241 | -11.277 | 1.00 |
| 29.38     | 1 . . |     |                   |         |          |        |         |      |
| ATOM 6551 | NE    | NE  | . ARG ARG ARG B B | 421 421 | . 72.728 | 91.057 | -11.370 | 1.00 |
| 32.90     | 1 . . |     |                   |         |          |        |         |      |
| ATOM 6552 | CZ    | CZ  | . ARG ARG ARG B B | 421 421 | . 71.964 | 91.507 | -12.365 | 1.00 |
| 34.91     | 1 . . |     |                   |         |          |        |         |      |
| ATOM 6553 | NH1   | NH1 | . ARG ARG ARG B B | 421 421 | . 70.660 | 91.282 | -12.337 | 1.00 |
| 36.62     | 1 . . |     |                   |         |          |        |         |      |
| ATOM 6554 | NH2   | NH2 | . ARG ARG ARG B B | 421 421 | . 72.488 | 92.171 | -13.391 | 1.00 |
| 33.93     | 1 . . |     |                   |         |          |        |         |      |
| ATOM 6555 | C     | C   | . ARG ARG ARG B B | 421 421 | . 78.004 | 91.051 | -9.557  | 1.00 |
| 14.98     | 1 . . |     |                   |         |          |        |         |      |
| ATOM 6556 | O     | O   | . ARG ARG ARG B B | 421 421 | . 77.604 | 91.762 | -8.645  | 1.00 |
| 16.78     | 1 . . |     |                   |         |          |        |         |      |
| ATOM 6557 | N     | N   | . PHE PHE PHE B B | 422 422 | . 79.208 | 91.179 | -10.107 | 1.00 |
| 12.03     | 1 . . |     |                   |         |          |        |         |      |
| ATOM 6558 | CA    | CA  | . PHE PHE PHE B B | 422 422 | . 80.219 | 92.112 | -9.626  | 1.00 |
| 8.24      | 1 . . |     |                   |         |          |        |         |      |
| ATOM 6559 | CB    | CB  | . PHE PHE PHE B B | 422 422 | . 81.462 | 91.365 | -9.119  | 1.00 |
| 8.12      | 1 . . |     |                   |         |          |        |         |      |
| ATOM 6560 | CG    | CG  | . PHE PHE PHE B B | 422 422 | . 82.660 | 92.244 | -8.883  | 1.00 |
| 6.72      | 1 . . |     |                   |         |          |        |         |      |
| ATOM 6561 | CD1   | CD1 | . PHE PHE PHE B B | 422 422 | . 82.628 | 93.269 | -7.911  | 1.00 |
| 4.39      | 1 . . |     |                   |         |          |        |         |      |
| ATOM 6562 | CE1   | CE1 | . PHE PHE PHE B B | 422 422 | . 83.705 | 94.006 | -7.663  | 1.00 |
| 3.75      | 1 . . |     |                   |         |          |        |         |      |
| ATOM 6563 | CZ    | CZ  | . PHE PHE PHE B B | 422 422 | . 84.876 | 93.889 | -8.457  | 1.00 |
| 3.42      | 1 . . |     |                   |         |          |        |         |      |
| ATOM 6564 | CE2   | CE2 | . PHE PHE PHE B B | 422 422 | . 84.932 | 92.881 | -9.445  | 1.00 |
| 7.05      | 1 . . |     |                   |         |          |        |         |      |
| ATOM 6565 | CD2   | CD2 | . PHE PHE PHE B B | 422 422 | . 83.832 | 92.084 | -9.643  | 1.00 |
| 8.37      | 1 . . |     |                   |         |          |        |         |      |
| ATOM 6566 | C     | C   | . PHE PHE PHE B B | 422 422 | . 80.568 | 92.986 | -10.794 | 1.00 |
| 6.65      | 1 . . |     |                   |         |          |        |         |      |
| ATOM 6567 | O     | O   | . PHE PHE PHE B B | 422 422 | . 80.762 | 92.486 | -11.898 | 1.00 |
| 8.02      | 1 . . |     |                   |         |          |        |         |      |
| ATOM 6568 | N     | N   | . ALA ALA ALA B B | 423 423 | . 80.616 | 94.307 | -10.592 | 1.00 |
| 5.75      | 1 . . |     |                   |         |          |        |         |      |
| ATOM 6569 | CA    | CA  | . ALA ALA ALA B B | 423 423 | . 80.698 | 95.215 | -11.754 | 1.00 |
| 5.40      | 1 . . |     |                   |         |          |        |         |      |
| ATOM 6570 | CB    | CB  | . ALA ALA ALA B B | 423 423 | . 80.596 | 96.718 | -11.331 | 1.00 |
| 5.24      | 1 . . |     |                   |         |          |        |         |      |
| ATOM 6571 | C     | C   | . ALA ALA ALA B B | 423 423 | . 81.914 | 94.995 | -12.585 | 1.00 |
| 5.97      | 1 . . |     |                   |         |          |        |         |      |
| ATOM 6572 | O     | O   | . ALA ALA ALA B B | 423 423 | . 81.814 | 95.115 | -13.804 | 1.00 |
| 7.14      | 1 . . |     |                   |         |          |        |         |      |
| ATOM 6573 | N     | N   | . GLY GLY GLY B B | 424 424 | . 83.031 | 94.739 | -11.931 | 1.00 |
| 6.48      | 1 . . |     |                   |         |          |        |         |      |
| ATOM 6574 | CA    | CA  | . GLY GLY GLY B B | 424 424 | . 84.297 | 94.425 | -12.569 | 1.00 |
| 8.08      | 1 . . |     |                   |         |          |        |         |      |
| ATOM 6575 | C     | C   | . GLY GLY GLY B B | 424 424 | . 84.656 | 95.512 | -13.588 | 1.00 |
| 10.59     | 1 . . |     |                   |         |          |        |         |      |
| ATOM 6576 | O     | O   | . GLY GLY GLY B B | 424 424 | . 84.606 | 96.713 | -13.327 | 1.00 |
| 10.60     | 1 . . |     |                   |         |          |        |         |      |





|           |     |       |               |     |         |          |         |         |      |
|-----------|-----|-------|---------------|-----|---------|----------|---------|---------|------|
| ATOM 6604 | C   | C     | . PHE PHE PHE | B B | 427 427 | . 81.572 | 101.022 | -13.738 | 1.00 |
| 3.40      | 1   | . . . |               |     |         |          |         |         |      |
| ATOM 6605 | O   | O     | . PHE PHE PHE | B B | 427 427 | . 80.652 | 101.559 | -13.088 | 1.00 |
| 3.91      | 1   | . . . |               |     |         |          |         |         |      |
| ATOM 6606 | N   | N     | . ARG ARG ARG | B B | 428 428 | . 82.019 | 101.500 | -14.897 | 1.00 |
| 5.90      | 1   | . . . |               |     |         |          |         |         |      |
| ATOM 6607 | CA  | CA    | . ARG ARG ARG | B B | 428 428 | . 81.540 | 102.779 | -15.432 | 1.00 |
| 7.57      | 1   | . . . |               |     |         |          |         |         |      |
| ATOM 6608 | CB  | CB    | . ARG ARG ARG | B B | 428 428 | . 82.479 | 103.339 | -16.505 | 1.00 |
| 6.87      | 1   | . . . |               |     |         |          |         |         |      |
| ATOM 6609 | CG  | CG    | . ARG ARG ARG | B B | 428 428 | . 83.821 | 103.839 | -15.984 | 1.00 |
| 9.02      | 1   | . . . |               |     |         |          |         |         |      |
| ATOM 6610 | CD  | CD    | . ARG ARG ARG | B B | 428 428 | . 84.783 | 104.347 | -17.110 | 1.00 |
| 6.50      | 1   | . . . |               |     |         |          |         |         |      |
| ATOM 6611 | NE  | NE    | . ARG ARG ARG | B B | 428 428 | . 84.121 | 105.461 | -17.765 | 1.00 |
| 5.37      | 1   | . . . |               |     |         |          |         |         |      |
| ATOM 6612 | CZ  | CZ    | . ARG ARG ARG | B B | 428 428 | . 84.612 | 106.134 | -18.828 | 1.00 |
| 5.50      | 1   | . . . |               |     |         |          |         |         |      |
| ATOM 6613 | NH1 | NH1   | . ARG ARG ARG | B B | 428 428 | . 85.845 | 105.908 | -19.269 | 1.00 |
| 7.24      | 1   | . . . |               |     |         |          |         |         |      |
| ATOM 6614 | NH2 | NH2   | . ARG ARG ARG | B B | 428 428 | . 83.897 | 107.151 | -19.336 | 1.00 |
| 9.62      | 1   | . . . |               |     |         |          |         |         |      |
| ATOM 6615 | C   | C     | . ARG ARG ARG | B B | 428 428 | . 80.127 | 102.594 | -15.931 | 1.00 |
| 9.21      | 1   | . . . |               |     |         |          |         |         |      |
| ATOM 6616 | O   | O     | . ARG ARG ARG | B B | 428 428 | . 79.291 | 103.483 | -15.817 | 1.00 |
| 13.22     | 1   | . . . |               |     |         |          |         |         |      |
| ATOM 6617 | N   | N     | . ASN ASN ASN | B B | 429 429 | . 79.804 | 101.449 | -16.537 | 1.00 |
| 11.78     | 1   | . . . |               |     |         |          |         |         |      |
| ATOM 6618 | CA  | CA    | . ASN ASN ASN | B B | 429 429 | . 78.419 | 101.345 | -16.997 | 1.00 |
| 12.55     | 1   | . . . |               |     |         |          |         |         |      |
| ATOM 6619 | CB  | CB    | . ASN ASN ASN | B B | 429 429 | . 78.298 | 101.742 | -18.457 | 1.00 |
| 13.89     | 1   | . . . |               |     |         |          |         |         |      |
| ATOM 6620 | CG  | CG    | . ASN ASN ASN | B B | 429 429 | . 79.017 | 100.783 | -19.370 | 1.00 |
| 16.45     | 1   | . . . |               |     |         |          |         |         |      |
| ATOM 6621 | OD1 | OD1   | . ASN ASN ASN | B B | 429 429 | . 78.590 | 100.577 | -20.519 | 1.00 |
| 21.33     | 1   | . . . |               |     |         |          |         |         |      |
| ATOM 6622 | ND2 | ND2   | . ASN ASN ASN | B B | 429 429 | . 80.119 | 100.163 | -18.874 | 1.00 |
| 18.21     | 1   | . . . |               |     |         |          |         |         |      |
| ATOM 6623 | C   | C     | . ASN ASN ASN | B B | 429 429 | . 77.910 | 99.930  | -16.790 | 1.00 |
| 13.90     | 1   | . . . |               |     |         |          |         |         |      |
| ATOM 6624 | O   | O     | . ASN ASN ASN | B B | 429 429 | . 77.817 | 99.111  | -17.749 | 1.00 |
| 13.85     | 1   | . . . |               |     |         |          |         |         |      |
| ATOM 6625 | N   | N     | . PRO PRO PRO | B B | 430 430 | . 77.600 | 99.622  | -15.530 | 1.00 |
| 14.40     | 1   | . . . |               |     |         |          |         |         |      |
| ATOM 6626 | CA  | CA    | . PRO PRO PRO | B B | 430 430 | . 77.232 | 98.279  | -15.067 | 1.00 |
| 16.24     | 1   | . . . |               |     |         |          |         |         |      |
| ATOM 6627 | CB  | CB    | . PRO PRO PRO | B B | 430 430 | . 77.161 | 98.479  | -13.556 | 1.00 |
| 15.98     | 1   | . . . |               |     |         |          |         |         |      |
| ATOM 6628 | CG  | CG    | . PRO PRO PRO | B B | 430 430 | . 76.763 | 99.906  | -13.405 | 1.00 |
| 15.71     | 1   | . . . |               |     |         |          |         |         |      |
| ATOM 6629 | CD  | CD    | . PRO PRO PRO | B B | 430 430 | . 77.623 | 100.585 | -14.408 | 1.00 |
| 13.58     | 1   | . . . |               |     |         |          |         |         |      |
| ATOM 6630 | C   | C     | . PRO PRO PRO | B B | 430 430 | . 75.887 | 97.810  | -15.574 | 1.00 |
| 19.05     | 1   | . . . |               |     |         |          |         |         |      |

|           |       |       |               |     |         |          |         |         |      |
|-----------|-------|-------|---------------|-----|---------|----------|---------|---------|------|
| ATOM 6631 | O     | O     | . PRO PRO PRO | B B | 430 430 | . 75.567 | 96.620  | -15.477 | 1.00 |
| 19.26     | 1     | . . . |               |     |         |          |         |         |      |
| ATOM 6632 | N     | N     | . SER SER SER | B B | 431 431 | . 75.107 | 98.752  | -16.099 | 1.00 |
| 21.90     | 1     | . . . |               |     |         |          |         |         |      |
| ATOM 6633 | CA    | CA    | . SER SER SER | B B | 431 431 | . 73.774 | 98.477  | -16.591 | 1.00 |
| 25.53     | 1     | . . . |               |     |         |          |         |         |      |
| ATOM 6634 | CB    | CB    | . SER SER SER | B B | 431 431 | . 73.153 | 99.742  | -17.165 | 1.00 |
| 26.06     | 1     | . . . |               |     |         |          |         |         |      |
| ATOM 6635 | OG    | OG    | . SER SER SER | B B | 431 431 | . 73.648 | 99.998  | -18.464 | 1.00 |
| 27.08     | 1     | . . . |               |     |         |          |         |         |      |
| ATOM 6636 | C     | C     | . SER SER SER | B B | 431 431 | . 73.739 | 97.404  | -17.665 | 1.00 |
| 26.55     | 1     | . . . |               |     |         |          |         |         |      |
| ATOM 6637 | O     | O     | . SER SER SER | B B | 431 431 | . 72.656 | 96.959  | -18.000 | 1.00 |
| 28.18     | 1     | . . . |               |     |         |          |         |         |      |
| ATOM 6638 | N     | N     | . VAL VAL VAL | B B | 432 432 | . 74.900 | 97.008  | -18.196 | 1.00 |
| 27.14     | 1     | . . . |               |     |         |          |         |         |      |
| ATOM 6639 | CA    | CA    | . VAL VAL VAL | B B | 432 432 | . 74.984 | 95.949  | -19.224 | 1.00 |
| 27.67     | 1     | . . . |               |     |         |          |         |         |      |
| ATOM 6640 | CB    | CB    | . VAL VAL VAL | B B | 432 432 | . 76.183 | 96.134  | -20.201 | 1.00 |
| 27.74     | 1     | . . . |               |     |         |          |         |         |      |
| ATOM 6641 | CG1   | CG1   | . VAL VAL VAL | B B | 432 432 | . 76.144 | 97.512  | -20.875 | 1.00 |
| 27.37     | 1     | . . . |               |     |         |          |         |         |      |
| ATOM 6642 | CG2   | CG2   | . VAL VAL VAL | B B | 432 432 | . 77.544 | 95.864  | -19.523 | 1.00 |
| 27.86     | 1     | . . . |               |     |         |          |         |         |      |
| ATOM 6643 | C     | C     | . VAL VAL VAL | B B | 432 432 | . 75.022 | 94.545  | -18.631 | 1.00 |
| 28.26     | 1     | . . . |               |     |         |          |         |         |      |
| ATOM 6644 | O     | O     | . VAL VAL VAL | B B | 432 432 | . 75.119 | 94.372  | -17.410 | 1.00 |
| 27.55     | 1     | . . . |               |     |         |          |         |         |      |
| ATOM 6645 | MG+2  | MG+2  | . MG2 MG2 MG2 | B B | 440 440 | . 86.035 | 114.571 | -3.635  | 1.00 |
| 2.80      | 1     | . . . |               |     |         |          |         |         |      |
| ATOM 6646 | MG+2  | MG+2  | . MG2 MG2 MG2 | B B | 441 441 | . 85.699 | 117.153 | -0.559  | 1.00 |
| 3.39      | 1     | . . . |               |     |         |          |         |         |      |
| ATOM 6647 | O3P   | O3P   | . PEP PEP PEP | B B | 442 442 | . 84.976 | 116.143 | 1.109   | 1.00 |
| 3.00      | 1     | . . . |               |     |         |          |         |         |      |
| ATOM 6648 | P     | P     | . PEP PEP PEP | B B | 442 442 | . 85.584 | 115.103 | 2.039   | 1.00 |
| 2.32      | 1     | . . . |               |     |         |          |         |         |      |
| ATOM 6649 | O1P   | O1P   | . PEP PEP PEP | B B | 442 442 | . 84.479 | 114.272 | 2.611   | 1.00 |
| 3.44      | 1     | . . . |               |     |         |          |         |         |      |
| ATOM 6650 | O2P   | O2P   | . PEP PEP PEP | B B | 442 442 | . 86.607 | 115.717 | 2.959   | 1.00 |
| 2.45      | 1     | . . . |               |     |         |          |         |         |      |
| ATOM 6651 | O2    | O2    | . PEP PEP PEP | B B | 442 442 | . 86.465 | 114.150 | 1.110   | 1.00 |
| 3.40      | 1     | . . . |               |     |         |          |         |         |      |
| ATOM 6652 | C2    | C2    | . PEP PEP PEP | B B | 442 442 | . 85.649 | 113.531 | 0.147   | 1.00 |
| 3.58      | 1     | . . . |               |     |         |          |         |         |      |
| ATOM 6653 | C3    | C3    | . PEP PEP PEP | B B | 442 442 | . 85.578 | 111.995 | 0.279   | 1.00 |
| 10.42     | 1     | . . . |               |     |         |          |         |         |      |
| ATOM 6654 | C1    | C1    | . PEP PEP PEP | B B | 442 442 | . 85.894 | 114.112 | -1.243  | 1.00 |
| 5.40      | 1     | . . . |               |     |         |          |         |         |      |
| ATOM 6655 | O1    | O1    | . PEP PEP PEP | B B | 442 442 | . 86.347 | 115.311 | -1.403  | 1.00 |
| 4.25      | 1     | . . . |               |     |         |          |         |         |      |
| ATOM 6656 | "O2'" | "O2'" | . PEP PEP PEP | B B | 442 442 | . 85.566 | 113.346 | -2.212  | 1.00 |
| 5.89      | 1     | . . . |               |     |         |          |         |         |      |
| ATOM 6657 | O     | O     | . HOH HOH HOH | B B | 446 446 | . 86.791 | 116.405 | -4.476  | 1.00 |
| 2.00      | 1     | . . . |               |     |         |          |         |         |      |

|           |       |     |                                                        |
|-----------|-------|-----|--------------------------------------------------------|
| ATOM 6658 | O     | O   | . HOH HOH HOH B B 447 447 . 86.486 118.137 -2.195 1.00 |
| 3.82      | 1 . . |     |                                                        |
| ATOM 6659 | O     | O   | . HOH HOH HOH B B 448 448 . 83.754 117.064 -1.432 1.00 |
| 5.39      | 1 . . |     |                                                        |
| ATOM 6660 | N     | N   | . GLY GLY GLY B B 555 555 . 96.030 116.495 0.096 0.50  |
| 7.08      | 1 . . |     |                                                        |
| ATOM 6661 | CA    | CA  | . GLY GLY GLY B B 555 555 . 95.572 117.949 -0.127 0.50 |
| 5.20      | 1 . . |     |                                                        |
| ATOM 6662 | C     | C   | . GLY GLY GLY B B 555 555 . 95.539 118.929 1.044 0.50  |
| 4.82      | 1 . . |     |                                                        |
| ATOM 6663 | O     | O   | . GLY GLY GLY B B 555 555 . 96.480 119.004 1.810 0.50  |
| 3.60      | 1 . . |     |                                                        |
| ATOM 6664 | N     | N   | . SER SER SER B B 556 556 . 94.426 119.648 1.174 0.50  |
| 4.98      | 1 . . |     |                                                        |
| ATOM 6665 | CA    | CA  | . SER SER SER B B 556 556 . 94.302 120.776 2.128 0.50  |
| 5.28      | 1 . . |     |                                                        |
| ATOM 6666 | CB    | CB  | . SER SER SER B B 556 556 . 92.908 121.351 2.080 0.50  |
| 5.83      | 1 . . |     |                                                        |
| ATOM 6667 | OG    | OG  | . SER SER SER B B 556 556 . 92.649 121.831 3.394 0.50  |
| 10.88     | 1 . . |     |                                                        |
| ATOM 6668 | C     | C   | . SER SER SER B B 556 556 . 94.510 120.410 3.581 0.50  |
| 5.55      | 1 . . |     |                                                        |
| ATOM 6669 | O     | O   | . SER SER SER B B 556 556 . 94.704 121.317 4.427 0.50  |
| 5.82      | 1 . . |     |                                                        |
| ATOM 6670 | N     | N   | . HIS HIS HIS B B 557 557 . 94.411 119.107 3.887 0.50  |
| 5.82      | 1 . . |     |                                                        |
| ATOM 6671 | CA    | CA  | . HIS HIS HIS B B 557 557 . 94.433 118.669 5.294 0.50  |
| 5.42      | 1 . . |     |                                                        |
| ATOM 6672 | CB    | CB  | . HIS HIS HIS B B 557 557 . 93.031 118.196 5.729 0.50  |
| 4.60      | 1 . . |     |                                                        |
| ATOM 6673 | CG    | CG  | . HIS HIS HIS B B 557 557 . 91.965 119.250 5.666 0.50  |
| 5.50      | 1 . . |     |                                                        |
| ATOM 6674 | ND1   | ND1 | . HIS HIS HIS B B 557 557 . 91.187 119.471 4.548 0.50  |
| 5.38      | 1 . . |     |                                                        |
| ATOM 6675 | CE1   | CE1 | . HIS HIS HIS B B 557 557 . 90.332 120.454 4.791 0.50  |
| 3.49      | 1 . . |     |                                                        |
| ATOM 6676 | NE2   | NE2 | . HIS HIS HIS B B 557 557 . 90.491 120.845 6.043 0.50  |
| 4.98      | 1 . . |     |                                                        |
| ATOM 6677 | CD2   | CD2 | . HIS HIS HIS B B 557 557 . 91.487 120.088 6.619 0.50  |
| 6.03      | 1 . . |     |                                                        |
| ATOM 6678 | C     | C   | . HIS HIS HIS B B 557 557 . 95.407 117.538 5.496 0.50  |
| 7.07      | 1 . . |     |                                                        |
| ATOM 6679 | O     | O   | . HIS HIS HIS B B 557 557 . 95.164 116.601 6.296 0.50  |
| 8.12      | 1 . . |     |                                                        |
| ATOM 6680 | N     | N   | . ALA ALA ALA B B 558 558 . 96.520 117.570 4.784 0.50  |
| 7.48      | 1 . . |     |                                                        |
| ATOM 6681 | CA    | CA  | . ALA ALA ALA B B 558 558 . 97.285 116.337 4.727 0.50  |
| 8.96      | 1 . . |     |                                                        |
| ATOM 6682 | CB    | CB  | . ALA ALA ALA B B 558 558 . 97.610 116.017 3.333 0.50  |
| 8.59      | 1 . . |     |                                                        |
| ATOM 6683 | C     | C   | . ALA ALA ALA B B 558 558 . 98.520 116.230 5.615 0.50  |
| 10.17     | 1 . . |     |                                                        |
| ATOM 6684 | O     | O   | . ALA ALA ALA B B 558 558 . 99.406 117.110 5.588 0.50  |
| 10.40     | 1 . . |     |                                                        |

|           |    |       |                             |         |         |         |      |
|-----------|----|-------|-----------------------------|---------|---------|---------|------|
| ATOM 6685 | N  | N     | . GLY GLY GLY B B 559 559 . | 98.578  | 115.135 | 6.375   | 0.50 |
| 10.81     | 1  | . . . |                             |         |         |         |      |
| ATOM 6686 | CA | CA    | . GLY GLY GLY B B 559 559 . | 99.703  | 114.899 | 7.268   | 0.50 |
| 12.19     | 1  | . . . |                             |         |         |         |      |
| ATOM 6687 | C  | C     | . GLY GLY GLY B B 559 559 . | 100.944 | 114.479 | 6.520   | 0.50 |
| 11.30     | 1  | . . . |                             |         |         |         |      |
| ATOM 6688 | O  | O     | . GLY GLY GLY B B 559 559 . | 102.017 | 115.029 | 6.713   | 0.50 |
| 10.93     | 1  | . . . |                             |         |         |         |      |
| ATOM 6689 | O  | O     | . HOH HOH HOH S . 1 1 .     | 95.217  | 88.492  | 18.858  | 1.00 |
| 2.26      | 1  | . . . |                             |         |         |         |      |
| ATOM 6690 | O  | O     | . HOH HOH HOH S . 2 2 .     | 87.880  | 92.335  | 26.333  | 1.00 |
| 2.08      | 1  | . . . |                             |         |         |         |      |
| ATOM 6691 | O  | O     | . HOH HOH HOH S . 3 3 .     | 90.217  | 90.802  | 23.446  | 1.00 |
| 2.62      | 1  | . . . |                             |         |         |         |      |
| ATOM 6692 | O  | O     | . HOH HOH HOH S . 4 4 .     | 82.262  | 107.009 | 14.678  | 1.00 |
| 2.77      | 1  | . . . |                             |         |         |         |      |
| ATOM 6693 | O  | O     | . HOH HOH HOH S . 5 5 .     | 92.953  | 103.711 | 24.522  | 1.00 |
| 2.20      | 1  | . . . |                             |         |         |         |      |
| ATOM 6694 | O  | O     | . HOH HOH HOH S . 6 6 .     | 88.310  | 110.291 | 9.641   | 1.00 |
| 2.19      | 1  | . . . |                             |         |         |         |      |
| ATOM 6695 | O  | O     | . HOH HOH HOH S . 7 7 .     | 84.098  | 94.886  | 21.337  | 1.00 |
| 2.83      | 1  | . . . |                             |         |         |         |      |
| ATOM 6696 | O  | O     | . HOH HOH HOH S . 8 8 .     | 80.464  | 123.023 | -4.173  | 1.00 |
| 2.76      | 1  | . . . |                             |         |         |         |      |
| ATOM 6697 | O  | O     | . HOH HOH HOH S . 9 9 .     | 92.133  | 80.254  | 10.596  | 1.00 |
| 2.81      | 1  | . . . |                             |         |         |         |      |
| ATOM 6698 | O  | O     | . HOH HOH HOH S . 10 10 .   | 79.941  | 96.405  | 8.979   | 1.00 |
| 2.39      | 1  | . . . |                             |         |         |         |      |
| ATOM 6699 | O  | O     | . HOH HOH HOH S . 11 11 .   | 96.310  | 86.511  | 20.364  | 1.00 |
| 4.98      | 1  | . . . |                             |         |         |         |      |
| ATOM 6700 | O  | O     | . HOH HOH HOH S . 12 12 .   | 92.771  | 90.270  | 12.260  | 1.00 |
| 3.94      | 1  | . . . |                             |         |         |         |      |
| ATOM 6701 | O  | O     | . HOH HOH HOH S . 13 13 .   | 93.611  | 81.789  | 3.755   | 1.00 |
| 4.00      | 1  | . . . |                             |         |         |         |      |
| ATOM 6702 | O  | O     | . HOH HOH HOH S . 14 14 .   | 94.824  | 101.775 | 24.254  | 1.00 |
| 3.22      | 1  | . . . |                             |         |         |         |      |
| ATOM 6703 | O  | O     | . HOH HOH HOH S . 15 15 .   | 86.603  | 96.419  | 10.917  | 1.00 |
| 3.28      | 1  | . . . |                             |         |         |         |      |
| ATOM 6704 | O  | O     | . HOH HOH HOH S . 16 16 .   | 90.771  | 86.293  | 14.414  | 1.00 |
| 4.82      | 1  | . . . |                             |         |         |         |      |
| ATOM 6705 | O  | O     | . HOH HOH HOH S . 17 17 .   | 84.844  | 92.027  | 19.695  | 1.00 |
| 3.12      | 1  | . . . |                             |         |         |         |      |
| ATOM 6706 | O  | O     | . HOH HOH HOH S . 18 18 .   | 84.262  | 108.620 | 46.229  | 1.00 |
| 2.48      | 1  | . . . |                             |         |         |         |      |
| ATOM 6707 | O  | O     | . HOH HOH HOH S . 19 19 .   | 104.664 | 97.892  | 21.209  | 1.00 |
| 4.11      | 1  | . . . |                             |         |         |         |      |
| ATOM 6708 | O  | O     | . HOH HOH HOH S . 20 20 .   | 88.667  | 93.023  | 23.331  | 1.00 |
| 2.59      | 1  | . . . |                             |         |         |         |      |
| ATOM 6709 | O  | O     | . HOH HOH HOH S . 21 21 .   | 87.060  | 120.477 | -5.413  | 1.00 |
| 3.66      | 1  | . . . |                             |         |         |         |      |
| ATOM 6710 | O  | O     | . HOH HOH HOH S . 22 22 .   | 86.778  | 93.887  | 21.203  | 1.00 |
| 2.62      | 1  | . . . |                             |         |         |         |      |
| ATOM 6711 | O  | O     | . HOH HOH HOH S . 23 23 .   | 82.376  | 112.028 | -21.584 | 1.00 |
| 7.75      | 1  | . . . |                             |         |         |         |      |

|           |   |       |                 |      |    |           |         |         |      |
|-----------|---|-------|-----------------|------|----|-----------|---------|---------|------|
| ATOM 6712 | O | O     | . HOH HOH HOH S | . 24 | 24 | . 96.072  | 83.039  | 4.559   | 1.00 |
| 5.85      | 1 | . . . |                 |      |    |           |         |         |      |
| ATOM 6713 | O | O     | . HOH HOH HOH S | . 25 | 25 | . 102.562 | 111.339 | 11.831  | 1.00 |
| 7.74      | 1 | . . . |                 |      |    |           |         |         |      |
| ATOM 6714 | O | O     | . HOH HOH HOH S | . 26 | 26 | . 88.399  | 105.385 | -0.897  | 1.00 |
| 4.06      | 1 | . . . |                 |      |    |           |         |         |      |
| ATOM 6715 | O | O     | . HOH HOH HOH S | . 27 | 27 | . 85.576  | 110.797 | -21.124 | 1.00 |
| 5.32      | 1 | . . . |                 |      |    |           |         |         |      |
| ATOM 6716 | O | O     | . HOH HOH HOH S | . 28 | 28 | . 86.219  | 93.407  | 17.534  | 1.00 |
| 2.72      | 1 | . . . |                 |      |    |           |         |         |      |
| ATOM 6717 | O | O     | . HOH HOH HOH S | . 29 | 29 | . 94.160  | 84.846  | 20.746  | 1.00 |
| 2.89      | 1 | . . . |                 |      |    |           |         |         |      |
| ATOM 6718 | O | O     | . HOH HOH HOH S | . 30 | 30 | . 94.146  | 99.187  | 13.890  | 1.00 |
| 2.00      | 1 | . . . |                 |      |    |           |         |         |      |
| ATOM 6719 | O | O     | . HOH HOH HOH S | . 31 | 31 | . 78.273  | 115.485 | -6.208  | 1.00 |
| 3.98      | 1 | . . . |                 |      |    |           |         |         |      |
| ATOM 6720 | O | O     | . HOH HOH HOH S | . 32 | 32 | . 92.046  | 87.055  | 16.849  | 1.00 |
| 2.70      | 1 | . . . |                 |      |    |           |         |         |      |
| ATOM 6721 | O | O     | . HOH HOH HOH S | . 33 | 33 | . 85.195  | 128.481 | -16.193 | 1.00 |
| 2.00      | 1 | . . . |                 |      |    |           |         |         |      |
| ATOM 6722 | O | O     | . HOH HOH HOH S | . 34 | 34 | . 93.201  | 112.454 | 13.852  | 1.00 |
| 2.60      | 1 | . . . |                 |      |    |           |         |         |      |
| ATOM 6723 | O | O     | . HOH HOH HOH S | . 35 | 35 | . 78.629  | 119.707 | 4.255   | 1.00 |
| 3.95      | 1 | . . . |                 |      |    |           |         |         |      |
| ATOM 6724 | O | O     | . HOH HOH HOH S | . 36 | 36 | . 102.253 | 86.556  | 27.423  | 1.00 |
| 3.32      | 1 | . . . |                 |      |    |           |         |         |      |
| ATOM 6725 | O | O     | . HOH HOH HOH S | . 37 | 37 | . 77.305  | 116.515 | 8.555   | 1.00 |
| 4.72      | 1 | . . . |                 |      |    |           |         |         |      |
| ATOM 6726 | O | O     | . HOH HOH HOH S | . 38 | 38 | . 95.791  | 90.293  | 30.910  | 1.00 |
| 5.79      | 1 | . . . |                 |      |    |           |         |         |      |
| ATOM 6727 | O | O     | . HOH HOH HOH S | . 39 | 39 | . 82.362  | 100.048 | 34.378  | 1.00 |
| 4.93      | 1 | . . . |                 |      |    |           |         |         |      |
| ATOM 6728 | O | O     | . HOH HOH HOH S | . 40 | 40 | . 97.751  | 100.948 | 8.467   | 1.00 |
| 5.44      | 1 | . . . |                 |      |    |           |         |         |      |
| ATOM 6729 | O | O     | . HOH HOH HOH S | . 41 | 41 | . 77.914  | 107.726 | 4.833   | 1.00 |
| 4.83      | 1 | . . . |                 |      |    |           |         |         |      |
| ATOM 6730 | O | O     | . HOH HOH HOH S | . 42 | 42 | . 89.701  | 74.535  | 25.017  | 1.00 |
| 10.33     | 1 | . . . |                 |      |    |           |         |         |      |
| ATOM 6731 | O | O     | . HOH HOH HOH S | . 43 | 43 | . 75.482  | 117.338 | 6.862   | 1.00 |
| 9.20      | 1 | . . . |                 |      |    |           |         |         |      |
| ATOM 6732 | O | O     | . HOH HOH HOH S | . 44 | 44 | . 76.918  | 104.970 | 5.481   | 1.00 |
| 4.18      | 1 | . . . |                 |      |    |           |         |         |      |
| ATOM 6733 | O | O     | . HOH HOH HOH S | . 45 | 45 | . 103.781 | 106.564 | 43.735  | 1.00 |
| 10.69     | 1 | . . . |                 |      |    |           |         |         |      |
| ATOM 6734 | O | O     | . HOH HOH HOH S | . 46 | 46 | . 112.427 | 108.053 | 27.685  | 1.00 |
| 7.92      | 1 | . . . |                 |      |    |           |         |         |      |
| ATOM 6735 | O | O     | . HOH HOH HOH S | . 47 | 47 | . 78.528  | 102.421 | 18.161  | 1.00 |
| 2.24      | 1 | . . . |                 |      |    |           |         |         |      |
| ATOM 6736 | O | O     | . HOH HOH HOH S | . 48 | 48 | . 96.255  | 101.147 | 11.083  | 1.00 |
| 7.31      | 1 | . . . |                 |      |    |           |         |         |      |
| ATOM 6737 | O | O     | . HOH HOH HOH S | . 50 | 50 | . 74.025  | 121.913 | 15.368  | 1.00 |
| 5.25      | 1 | . . . |                 |      |    |           |         |         |      |
| ATOM 6738 | O | O     | . HOH HOH HOH S | . 51 | 51 | . 84.999  | 115.596 | 11.229  | 1.00 |
| 7.15      | 1 | . . . |                 |      |    |           |         |         |      |



|           |   |       |                 |       |     |           |         |         |      |
|-----------|---|-------|-----------------|-------|-----|-----------|---------|---------|------|
| ATOM 6766 | O | O     | . HOH HOH HOH S | . 79  | 79  | . 73.634  | 120.976 | -2.434  | 1.00 |
| 6.91      | 1 | . . . |                 |       |     |           |         |         |      |
| ATOM 6767 | O | O     | . HOH HOH HOH S | . 80  | 80  | . 95.262  | 113.089 | 12.126  | 1.00 |
| 11.72     | 1 | . . . |                 |       |     |           |         |         |      |
| ATOM 6768 | O | O     | . HOH HOH HOH S | . 81  | 81  | . 85.240  | 120.879 | -7.992  | 1.00 |
| 5.11      | 1 | . . . |                 |       |     |           |         |         |      |
| ATOM 6769 | O | O     | . HOH HOH HOH S | . 82  | 82  | . 106.296 | 95.917  | 0.011   | 1.00 |
| 12.04     | 1 | . . . |                 |       |     |           |         |         |      |
| ATOM 6770 | O | O     | . HOH HOH HOH S | . 83  | 83  | . 112.679 | 112.574 | 21.069  | 1.00 |
| 9.09      | 1 | . . . |                 |       |     |           |         |         |      |
| ATOM 6771 | O | O     | . HOH HOH HOH S | . 84  | 84  | . 79.201  | 127.985 | -17.876 | 1.00 |
| 7.23      | 1 | . . . |                 |       |     |           |         |         |      |
| ATOM 6772 | O | O     | . HOH HOH HOH S | . 85  | 85  | . 102.374 | 117.159 | -9.956  | 1.00 |
| 26.60     | 1 | . . . |                 |       |     |           |         |         |      |
| ATOM 6773 | O | O     | . HOH HOH HOH S | . 87  | 87  | . 85.509  | 124.820 | -1.630  | 1.00 |
| 10.31     | 1 | . . . |                 |       |     |           |         |         |      |
| ATOM 6774 | O | O     | . HOH HOH HOH S | . 88  | 88  | . 84.317  | 83.752  | 4.803   | 1.00 |
| 9.58      | 1 | . . . |                 |       |     |           |         |         |      |
| ATOM 6775 | O | O     | . HOH HOH HOH S | . 89  | 89  | . 96.280  | 100.046 | 31.123  | 1.00 |
| 5.21      | 1 | . . . |                 |       |     |           |         |         |      |
| ATOM 6776 | O | O     | . HOH HOH HOH S | . 90  | 90  | . 85.893  | 109.404 | -7.739  | 1.00 |
| 5.01      | 1 | . . . |                 |       |     |           |         |         |      |
| ATOM 6777 | O | O     | . HOH HOH HOH S | . 91  | 91  | . 82.361  | 120.071 | 7.577   | 1.00 |
| 11.73     | 1 | . . . |                 |       |     |           |         |         |      |
| ATOM 6778 | O | O     | . HOH HOH HOH S | . 92  | 92  | . 88.809  | 98.566  | 38.341  | 1.00 |
| 9.99      | 1 | . . . |                 |       |     |           |         |         |      |
| ATOM 6779 | O | O     | . HOH HOH HOH S | . 93  | 93  | . 92.579  | 111.557 | 1.203   | 1.00 |
| 15.29     | 1 | . . . |                 |       |     |           |         |         |      |
| ATOM 6780 | O | O     | . HOH HOH HOH S | . 94  | 94  | . 70.172  | 113.763 | 22.914  | 1.00 |
| 10.60     | 1 | . . . |                 |       |     |           |         |         |      |
| ATOM 6781 | O | O     | . HOH HOH HOH S | . 95  | 95  | . 76.587  | 116.432 | 11.396  | 1.00 |
| 6.58      | 1 | . . . |                 |       |     |           |         |         |      |
| ATOM 6782 | O | O     | . HOH HOH HOH S | . 96  | 96  | . 84.557  | 113.077 | 38.554  | 1.00 |
| 10.03     | 1 | . . . |                 |       |     |           |         |         |      |
| ATOM 6783 | O | O     | . HOH HOH HOH S | . 97  | 97  | . 61.407  | 104.350 | 3.288   | 1.00 |
| 10.03     | 1 | . . . |                 |       |     |           |         |         |      |
| ATOM 6784 | O | O     | . HOH HOH HOH S | . 98  | 98  | . 79.254  | 116.833 | 26.422  | 1.00 |
| 11.85     | 1 | . . . |                 |       |     |           |         |         |      |
| ATOM 6785 | O | O     | . HOH HOH HOH S | . 99  | 99  | . 99.473  | 102.718 | 20.535  | 1.00 |
| 4.26      | 1 | . . . |                 |       |     |           |         |         |      |
| ATOM 6786 | O | O     | . HOH HOH HOH S | . 100 | 100 | . 93.349  | 118.940 | -2.965  | 1.00 |
| 9.83      | 1 | . . . |                 |       |     |           |         |         |      |
| ATOM 6787 | O | O     | . HOH HOH HOH S | . 101 | 101 | . 104.430 | 93.430  | 27.225  | 1.00 |
| 5.94      | 1 | . . . |                 |       |     |           |         |         |      |
| ATOM 6788 | O | O     | . HOH HOH HOH S | . 102 | 102 | . 78.975  | 114.814 | -20.222 | 1.00 |
| 11.86     | 1 | . . . |                 |       |     |           |         |         |      |
| ATOM 6789 | O | O     | . HOH HOH HOH S | . 103 | 103 | . 76.404  | 67.611  | 17.338  | 1.00 |
| 5.90      | 1 | . . . |                 |       |     |           |         |         |      |
| ATOM 6790 | O | O     | . HOH HOH HOH S | . 104 | 104 | . 80.006  | 123.693 | 19.891  | 1.00 |
| 3.73      | 1 | . . . |                 |       |     |           |         |         |      |
| ATOM 6791 | O | O     | . HOH HOH HOH S | . 105 | 105 | . 88.191  | 88.687  | 0.885   | 1.00 |
| 4.88      | 1 | . . . |                 |       |     |           |         |         |      |
| ATOM 6792 | O | O     | . HOH HOH HOH S | . 106 | 106 | . 67.975  | 123.975 | 17.848  | 1.00 |
| 9.63      | 1 | . . . |                 |       |     |           |         |         |      |



|           |   |       |                 |           |           |         |         |      |
|-----------|---|-------|-----------------|-----------|-----------|---------|---------|------|
| ATOM 6793 | O | O     | . HOH HOH HOH S | . 107 107 | . 80.382  | 93.157  | 12.878  | 1.00 |
| 12.60     | 1 | . . . |                 |           |           |         |         |      |
| ATOM 6794 | O | O     | . HOH HOH HOH S | . 108 108 | . 74.422  | 125.565 | -18.724 | 1.00 |
| 12.98     | 1 | . . . |                 |           |           |         |         |      |
| ATOM 6795 | O | O     | . HOH HOH HOH S | . 109 109 | . 78.367  | 103.901 | -12.701 | 1.00 |
| 7.87      | 1 | . . . |                 |           |           |         |         |      |
| ATOM 6796 | O | O     | . HOH HOH HOH S | . 110 110 | . 81.433  | 115.498 | 12.419  | 1.00 |
| 5.27      | 1 | . . . |                 |           |           |         |         |      |
| ATOM 6797 | O | O     | . HOH HOH HOH S | . 111 111 | . 90.597  | 105.094 | 41.789  | 1.00 |
| 4.42      | 1 | . . . |                 |           |           |         |         |      |
| ATOM 6798 | O | O     | . HOH HOH HOH S | . 112 112 | . 74.420  | 76.111  | 11.800  | 1.00 |
| 7.64      | 1 | . . . |                 |           |           |         |         |      |
| ATOM 6799 | O | O     | . HOH HOH HOH S | . 113 113 | . 110.470 | 108.771 | 14.917  | 1.00 |
| 15.44     | 1 | . . . |                 |           |           |         |         |      |
| ATOM 6800 | O | O     | . HOH HOH HOH S | . 114 114 | . 91.937  | 110.983 | 11.735  | 1.00 |
| 4.32      | 1 | . . . |                 |           |           |         |         |      |
| ATOM 6801 | O | O     | . HOH HOH HOH S | . 115 115 | . 77.255  | 124.647 | 23.436  | 1.00 |
| 9.33      | 1 | . . . |                 |           |           |         |         |      |
| ATOM 6802 | O | O     | . HOH HOH HOH S | . 116 116 | . 73.117  | 81.901  | 32.488  | 1.00 |
| 11.09     | 1 | . . . |                 |           |           |         |         |      |
| ATOM 6803 | O | O     | . HOH HOH HOH S | . 117 117 | . 85.267  | 125.240 | -22.272 | 1.00 |
| 8.12      | 1 | . . . |                 |           |           |         |         |      |
| ATOM 6804 | O | O     | . HOH HOH HOH S | . 118 118 | . 72.652  | 69.219  | 14.963  | 1.00 |
| 13.42     | 1 | . . . |                 |           |           |         |         |      |
| ATOM 6805 | O | O     | . HOH HOH HOH S | . 119 119 | . 88.067  | 108.155 | -1.016  | 1.00 |
| 9.71      | 1 | . . . |                 |           |           |         |         |      |
| ATOM 6806 | O | O     | . HOH HOH HOH S | . 120 120 | . 96.535  | 123.360 | 20.151  | 1.00 |
| 7.15      | 1 | . . . |                 |           |           |         |         |      |
| ATOM 6807 | O | O     | . HOH HOH HOH S | . 121 121 | . 73.642  | 91.505  | 16.553  | 1.00 |
| 14.49     | 1 | . . . |                 |           |           |         |         |      |
| ATOM 6808 | O | O     | . HOH HOH HOH S | . 122 122 | . 81.200  | 124.791 | -19.654 | 1.00 |
| 6.77      | 1 | . . . |                 |           |           |         |         |      |
| ATOM 6809 | O | O     | . HOH HOH HOH S | . 123 123 | . 75.048  | 78.282  | 31.604  | 1.00 |
| 12.33     | 1 | . . . |                 |           |           |         |         |      |
| ATOM 6810 | O | O     | . HOH HOH HOH S | . 124 124 | . 111.721 | 105.174 | 23.027  | 1.00 |
| 8.93      | 1 | . . . |                 |           |           |         |         |      |
| ATOM 6811 | O | O     | . HOH HOH HOH S | . 125 125 | . 82.892  | 77.527  | 6.175   | 1.00 |
| 10.13     | 1 | . . . |                 |           |           |         |         |      |
| ATOM 6812 | O | O     | . HOH HOH HOH S | . 126 126 | . 79.114  | 99.219  | 14.992  | 1.00 |
| 6.96      | 1 | . . . |                 |           |           |         |         |      |
| ATOM 6813 | O | O     | . HOH HOH HOH S | . 127 127 | . 104.498 | 91.987  | 30.032  | 1.00 |
| 11.25     | 1 | . . . |                 |           |           |         |         |      |
| ATOM 6814 | O | O     | . HOH HOH HOH S | . 128 128 | . 103.721 | 123.079 | 20.545  | 1.00 |
| 7.93      | 1 | . . . |                 |           |           |         |         |      |
| ATOM 6815 | O | O     | . HOH HOH HOH S | . 129 129 | . 121.625 | 98.981  | 35.899  | 1.00 |
| 12.61     | 1 | . . . |                 |           |           |         |         |      |
| ATOM 6816 | O | O     | . HOH HOH HOH S | . 130 130 | . 75.197  | 127.902 | 15.002  | 1.00 |
| 13.03     | 1 | . . . |                 |           |           |         |         |      |
| ATOM 6817 | O | O     | . HOH HOH HOH S | . 131 131 | . 73.420  | 97.451  | 24.752  | 1.00 |
| 10.86     | 1 | . . . |                 |           |           |         |         |      |
| ATOM 6818 | O | O     | . HOH HOH HOH S | . 132 132 | . 109.725 | 89.371  | 25.138  | 1.00 |
| 10.44     | 1 | . . . |                 |           |           |         |         |      |
| ATOM 6819 | O | O     | . HOH HOH HOH S | . 133 133 | . 70.469  | 119.299 | 21.746  | 1.00 |
| 12.67     | 1 | . . . |                 |           |           |         |         |      |

|           |   |       |                 |           |           |         |         |      |
|-----------|---|-------|-----------------|-----------|-----------|---------|---------|------|
| ATOM 6820 | O | O     | . HOH HOH HOH S | . 134 134 | . 89.224  | 74.084  | 9.566   | 1.00 |
| 8.34      | 1 | . . . |                 |           |           |         |         |      |
| ATOM 6821 | O | O     | . HOH HOH HOH S | . 135 135 | . 92.267  | 118.555 | -0.435  | 1.00 |
| 9.85      | 1 | . . . |                 |           |           |         |         |      |
| ATOM 6822 | O | O     | . HOH HOH HOH S | . 136 136 | . 99.465  | 93.052  | 44.082  | 1.00 |
| 11.76     | 1 | . . . |                 |           |           |         |         |      |
| ATOM 6823 | O | O     | . HOH HOH HOH S | . 137 137 | . 104.233 | 91.170  | 23.737  | 1.00 |
| 8.65      | 1 | . . . |                 |           |           |         |         |      |
| ATOM 6824 | O | O     | . HOH HOH HOH S | . 138 138 | . 91.902  | 85.401  | 19.085  | 1.00 |
| 7.37      | 1 | . . . |                 |           |           |         |         |      |
| ATOM 6825 | O | O     | . HOH HOH HOH S | . 139 139 | . 65.955  | 121.718 | 0.777   | 1.00 |
| 10.55     | 1 | . . . |                 |           |           |         |         |      |
| ATOM 6826 | O | O     | . HOH HOH HOH S | . 140 140 | . 78.292  | 108.095 | 8.649   | 1.00 |
| 5.26      | 1 | . . . |                 |           |           |         |         |      |
| ATOM 6827 | O | O     | . HOH HOH HOH S | . 141 141 | . 98.450  | 82.916  | 18.584  | 1.00 |
| 11.46     | 1 | . . . |                 |           |           |         |         |      |
| ATOM 6828 | O | O     | . HOH HOH HOH S | . 142 142 | . 106.425 | 98.688  | 23.278  | 1.00 |
| 4.21      | 1 | . . . |                 |           |           |         |         |      |
| ATOM 6829 | O | O     | . HOH HOH HOH S | . 143 143 | . 54.636  | 101.401 | 13.808  | 1.00 |
| 19.23     | 1 | . . . |                 |           |           |         |         |      |
| ATOM 6830 | O | O     | . HOH HOH HOH S | . 144 144 | . 98.029  | 88.658  | 15.990  | 1.00 |
| 8.39      | 1 | . . . |                 |           |           |         |         |      |
| ATOM 6831 | O | O     | . HOH HOH HOH S | . 145 145 | . 100.071 | 102.350 | 9.452   | 1.00 |
| 13.19     | 1 | . . . |                 |           |           |         |         |      |
| ATOM 6832 | O | O     | . HOH HOH HOH S | . 146 146 | . 77.071  | 68.725  | 21.799  | 1.00 |
| 10.44     | 1 | . . . |                 |           |           |         |         |      |
| ATOM 6833 | O | O     | . HOH HOH HOH S | . 147 147 | . 76.791  | 76.104  | 9.947   | 1.00 |
| 11.57     | 1 | . . . |                 |           |           |         |         |      |
| ATOM 6834 | O | O     | . HOH HOH HOH S | . 148 148 | . 98.013  | 100.842 | 45.300  | 1.00 |
| 20.56     | 1 | . . . |                 |           |           |         |         |      |
| ATOM 6835 | O | O     | . HOH HOH HOH S | . 149 149 | . 79.325  | 71.002  | 6.956   | 1.00 |
| 21.45     | 1 | . . . |                 |           |           |         |         |      |
| ATOM 6836 | O | O     | . HOH HOH HOH S | . 150 150 | . 79.885  | 88.630  | -11.364 | 1.00 |
| 12.80     | 1 | . . . |                 |           |           |         |         |      |
| ATOM 6837 | O | O     | . HOH HOH HOH S | . 151 151 | . 75.291  | 109.695 | 27.530  | 1.00 |
| 12.22     | 1 | . . . |                 |           |           |         |         |      |
| ATOM 6838 | O | O     | . HOH HOH HOH S | . 152 152 | . 67.890  | 77.157  | 30.311  | 1.00 |
| 8.58      | 1 | . . . |                 |           |           |         |         |      |
| ATOM 6839 | O | O     | . HOH HOH HOH S | . 153 153 | . 70.868  | 86.633  | 32.479  | 1.00 |
| 9.20      | 1 | . . . |                 |           |           |         |         |      |
| ATOM 6840 | O | O     | . HOH HOH HOH S | . 154 154 | . 76.688  | 104.544 | -18.353 | 1.00 |
| 68.41     | 1 | . . . |                 |           |           |         |         |      |
| ATOM 6841 | O | O     | . HOH HOH HOH S | . 155 155 | . 54.058  | 108.536 | 11.067  | 1.00 |
| 15.86     | 1 | . . . |                 |           |           |         |         |      |
| ATOM 6842 | O | O     | . HOH HOH HOH S | . 156 156 | . 69.701  | 126.795 | 14.908  | 1.00 |
| 21.22     | 1 | . . . |                 |           |           |         |         |      |
| ATOM 6843 | O | O     | . HOH HOH HOH S | . 157 157 | . 108.266 | 108.635 | 41.666  | 1.00 |
| 18.27     | 1 | . . . |                 |           |           |         |         |      |
| ATOM 6844 | O | O     | . HOH HOH HOH S | . 158 158 | . 96.442  | 116.688 | 35.053  | 1.00 |
| 13.15     | 1 | . . . |                 |           |           |         |         |      |
| ATOM 6845 | O | O     | . HOH HOH HOH S | . 159 159 | . 86.443  | 123.359 | 23.169  | 1.00 |
| 15.00     | 1 | . . . |                 |           |           |         |         |      |
| ATOM 6846 | O | O     | . HOH HOH HOH S | . 160 160 | . 71.264  | 75.269  | 20.943  | 1.00 |
| 12.80     | 1 | . . . |                 |           |           |         |         |      |

|           |   |       |                 |           |          |         |         |      |
|-----------|---|-------|-----------------|-----------|----------|---------|---------|------|
| ATOM 6847 | O | O     | . HOH HOH HOH S | . 161 161 | . 76.346 | 115.151 | -20.045 | 1.00 |
| 8.97      | 1 | . . . |                 |           |          |         |         |      |
| ATOM 6848 | O | O     | . HOH HOH HOH S | . 162 162 | . 78.730 | 99.272  | 12.417  | 1.00 |
| 6.91      | 1 | . . . |                 |           |          |         |         |      |
| ATOM 6849 | O | O     | . HOH HOH HOH S | . 163 163 | . 88.854 | 86.367  | -0.451  | 1.00 |
| 14.56     | 1 | . . . |                 |           |          |         |         |      |
| ATOM 6850 | O | O     | . HOH HOH HOH S | . 164 164 | . 68.161 | 127.742 | 12.820  | 1.00 |
| 15.35     | 1 | . . . |                 |           |          |         |         |      |
| ATOM 6851 | O | O     | . HOH HOH HOH S | . 165 165 | . 56.278 | 108.376 | -0.427  | 1.00 |
| 14.98     | 1 | . . . |                 |           |          |         |         |      |
| ATOM 6852 | O | O     | . HOH HOH HOH S | . 166 166 | . 64.439 | 122.213 | 3.177   | 1.00 |
| 14.42     | 1 | . . . |                 |           |          |         |         |      |
| ATOM 6853 | O | O     | . HOH HOH HOH S | . 167 167 | . 59.364 | 99.493  | 10.602  | 1.00 |
| 14.19     | 1 | . . . |                 |           |          |         |         |      |
| ATOM 6854 | O | O     | . HOH HOH HOH S | . 168 168 | . 83.785 | 67.395  | 24.049  | 1.00 |
| 11.92     | 1 | . . . |                 |           |          |         |         |      |
| ATOM 6855 | O | O     | . HOH HOH HOH S | . 169 169 | . 89.298 | 85.733  | -3.150  | 1.00 |
| 10.13     | 1 | . . . |                 |           |          |         |         |      |
| ATOM 6856 | O | O     | . HOH HOH HOH S | . 170 170 | . 73.264 | 114.189 | 22.720  | 1.00 |
| 18.35     | 1 | . . . |                 |           |          |         |         |      |
| ATOM 6857 | O | O     | . HOH HOH HOH S | . 171 171 | . 78.316 | 72.245  | 28.960  | 1.00 |
| 15.04     | 1 | . . . |                 |           |          |         |         |      |
| ATOM 6858 | O | O     | . HOH HOH HOH S | . 172 172 | . 93.414 | 72.364  | 14.232  | 1.00 |
| 12.19     | 1 | . . . |                 |           |          |         |         |      |
| ATOM 6859 | O | O     | . HOH HOH HOH S | . 173 173 | . 98.032 | 80.235  | 13.486  | 1.00 |
| 16.19     | 1 | . . . |                 |           |          |         |         |      |
| ATOM 6860 | O | O     | . HOH HOH HOH S | . 174 174 | . 83.495 | 100.479 | -17.088 | 1.00 |
| 14.68     | 1 | . . . |                 |           |          |         |         |      |
| ATOM 6861 | O | O     | . HOH HOH HOH S | . 175 175 | . 84.901 | 114.987 | -27.659 | 1.00 |
| 11.05     | 1 | . . . |                 |           |          |         |         |      |
| ATOM 6862 | O | O     | . HOH HOH HOH S | . 176 176 | . 90.785 | 76.232  | 26.800  | 1.00 |
| 7.09      | 1 | . . . |                 |           |          |         |         |      |
| ATOM 6863 | O | O     | . HOH HOH HOH S | . 177 177 | . 78.414 | 94.992  | 18.182  | 1.00 |
| 8.93      | 1 | . . . |                 |           |          |         |         |      |
| ATOM 6864 | O | O     | . HOH HOH HOH S | . 178 178 | . 58.135 | 125.381 | 3.037   | 1.00 |
| 11.34     | 1 | . . . |                 |           |          |         |         |      |
| ATOM 6865 | O | O     | . HOH HOH HOH S | . 179 179 | . 74.445 | 101.291 | 9.835   | 1.00 |
| 14.76     | 1 | . . . |                 |           |          |         |         |      |
| ATOM 6866 | O | O     | . HOH HOH HOH S | . 180 180 | . 80.001 | 123.916 | 2.303   | 1.00 |
| 20.17     | 1 | . . . |                 |           |          |         |         |      |
| ATOM 6867 | O | O     | . HOH HOH HOH S | . 181 181 | . 85.565 | 118.562 | 18.124  | 1.00 |
| 10.42     | 1 | . . . |                 |           |          |         |         |      |
| ATOM 6868 | O | O     | . HOH HOH HOH S | . 182 182 | . 75.529 | 97.426  | 9.472   | 1.00 |
| 12.94     | 1 | . . . |                 |           |          |         |         |      |
| ATOM 6869 | O | O     | . HOH HOH HOH S | . 183 183 | . 91.117 | 114.262 | 14.095  | 1.00 |
| 11.55     | 1 | . . . |                 |           |          |         |         |      |
| ATOM 6870 | O | O     | . HOH HOH HOH S | . 184 184 | . 96.758 | 111.289 | -22.116 | 1.00 |
| 11.98     | 1 | . . . |                 |           |          |         |         |      |
| ATOM 6871 | O | O     | . HOH HOH HOH S | . 185 185 | . 99.809 | 97.209  | 44.946  | 1.00 |
| 11.61     | 1 | . . . |                 |           |          |         |         |      |
| ATOM 6872 | O | O     | . HOH HOH HOH S | . 186 186 | . 94.409 | 123.323 | 33.346  | 1.00 |
| 24.17     | 1 | . . . |                 |           |          |         |         |      |
| ATOM 6873 | O | O     | . HOH HOH HOH S | . 187 187 | . 82.306 | 91.654  | 37.929  | 1.00 |
| 21.31     | 1 | . . . |                 |           |          |         |         |      |



|           |   |       |                 |           |           |         |         |      |
|-----------|---|-------|-----------------|-----------|-----------|---------|---------|------|
| ATOM 6901 | O | O     | . HOH HOH HOH S | . 216 216 | . 84.643  | 109.224 | 42.234  | 1.00 |
| 15.33     | 1 | . . . |                 |           |           |         |         |      |
| ATOM 6902 | O | O     | . HOH HOH HOH S | . 217 217 | . 69.301  | 100.117 | 12.529  | 1.00 |
| 13.65     | 1 | . . . |                 |           |           |         |         |      |
| ATOM 6903 | O | O     | . HOH HOH HOH S | . 218 218 | . 104.056 | 115.626 | -10.591 | 1.00 |
| 13.74     | 1 | . . . |                 |           |           |         |         |      |
| ATOM 6904 | O | O     | . HOH HOH HOH S | . 219 219 | . 69.089  | 121.272 | -0.139  | 1.00 |
| 17.07     | 1 | . . . |                 |           |           |         |         |      |
| ATOM 6905 | O | O     | . HOH HOH HOH S | . 220 220 | . 75.292  | 101.774 | -17.093 | 1.00 |
| 20.77     | 1 | . . . |                 |           |           |         |         |      |
| ATOM 6906 | O | O     | . HOH HOH HOH S | . 221 221 | . 65.555  | 79.695  | 19.198  | 1.00 |
| 21.46     | 1 | . . . |                 |           |           |         |         |      |
| ATOM 6907 | O | O     | . HOH HOH HOH S | . 222 222 | . 112.342 | 115.896 | 16.298  | 1.00 |
| 43.22     | 1 | . . . |                 |           |           |         |         |      |
| ATOM 6908 | O | O     | . HOH HOH HOH S | . 223 223 | . 78.860  | 130.398 | -13.492 | 1.00 |
| 8.22      | 1 | . . . |                 |           |           |         |         |      |
| ATOM 6909 | O | O     | . HOH HOH HOH S | . 224 224 | . 94.276  | 99.060  | 40.458  | 1.00 |
| 6.88      | 1 | . . . |                 |           |           |         |         |      |
| ATOM 6910 | O | O     | . HOH HOH HOH S | . 225 225 | . 86.136  | 122.226 | -1.826  | 1.00 |
| 9.40      | 1 | . . . |                 |           |           |         |         |      |
| ATOM 6911 | O | O     | . HOH HOH HOH S | . 226 226 | . 89.071  | 117.958 | 12.899  | 1.00 |
| 13.83     | 1 | . . . |                 |           |           |         |         |      |
| ATOM 6912 | O | O     | . HOH HOH HOH S | . 228 228 | . 71.698  | 94.938  | 23.716  | 1.00 |
| 13.09     | 1 | . . . |                 |           |           |         |         |      |
| ATOM 6913 | O | O     | . HOH HOH HOH S | . 229 229 | . 79.025  | 98.287  | 42.102  | 1.00 |
| 51.39     | 1 | . . . |                 |           |           |         |         |      |
| ATOM 6914 | O | O     | . HOH HOH HOH S | . 230 230 | . 69.055  | 95.351  | 6.098   | 1.00 |
| 13.84     | 1 | . . . |                 |           |           |         |         |      |
| ATOM 6915 | O | O     | . HOH HOH HOH S | . 231 231 | . 101.056 | 85.136  | 21.078  | 1.00 |
| 15.01     | 1 | . . . |                 |           |           |         |         |      |
| ATOM 6916 | O | O     | . HOH HOH HOH S | . 232 232 | . 54.880  | 102.539 | 9.631   | 1.00 |
| 22.50     | 1 | . . . |                 |           |           |         |         |      |
| ATOM 6917 | O | O     | . HOH HOH HOH S | . 233 233 | . 86.136  | 78.641  | 5.584   | 1.00 |
| 7.77      | 1 | . . . |                 |           |           |         |         |      |
| ATOM 6918 | O | O     | . HOH HOH HOH S | . 234 234 | . 101.490 | 91.249  | -14.312 | 1.00 |
| 41.04     | 1 | . . . |                 |           |           |         |         |      |
| ATOM 6919 | O | O     | . HOH HOH HOH S | . 235 235 | . 72.814  | 99.913  | 38.134  | 1.00 |
| 20.25     | 1 | . . . |                 |           |           |         |         |      |
| ATOM 6920 | O | O     | . HOH HOH HOH S | . 236 236 | . 102.999 | 86.312  | 19.652  | 1.00 |
| 14.85     | 1 | . . . |                 |           |           |         |         |      |
| ATOM 6921 | O | O     | . HOH HOH HOH S | . 237 237 | . 107.177 | 95.580  | 16.469  | 1.00 |
| 14.34     | 1 | . . . |                 |           |           |         |         |      |
| ATOM 6922 | O | O     | . HOH HOH HOH S | . 238 238 | . 101.355 | 120.942 | -18.049 | 1.00 |
| 36.68     | 1 | . . . |                 |           |           |         |         |      |
| ATOM 6923 | O | O     | . HOH HOH HOH S | . 239 239 | . 100.590 | 95.191  | 45.790  | 1.00 |
| 21.35     | 1 | . . . |                 |           |           |         |         |      |
| ATOM 6924 | O | O     | . HOH HOH HOH S | . 240 240 | . 81.542  | 130.718 | 20.992  | 1.00 |
| 23.84     | 1 | . . . |                 |           |           |         |         |      |
| ATOM 6925 | O | O     | . HOH HOH HOH S | . 241 241 | . 79.502  | 117.371 | 28.876  | 1.00 |
| 16.88     | 1 | . . . |                 |           |           |         |         |      |
| ATOM 6926 | O | O     | . HOH HOH HOH S | . 242 242 | . 100.453 | 100.692 | 43.849  | 1.00 |
| 18.89     | 1 | . . . |                 |           |           |         |         |      |
| ATOM 6927 | O | O     | . HOH HOH HOH S | . 243 243 | . 103.694 | 110.989 | -21.579 | 1.00 |
| 20.42     | 1 | . . . |                 |           |           |         |         |      |

|           |   |       |                 |       |     |           |         |         |      |
|-----------|---|-------|-----------------|-------|-----|-----------|---------|---------|------|
| ATOM 6928 | O | O     | . HOH HOH HOH S | . 244 | 244 | . 87.864  | 67.368  | 26.221  | 1.00 |
| 19.54     | 1 | . . . |                 |       |     |           |         |         |      |
| ATOM 6929 | O | O     | . HOH HOH HOH S | . 245 | 245 | . 97.953  | 90.811  | 44.904  | 1.00 |
| 17.35     | 1 | . . . |                 |       |     |           |         |         |      |
| ATOM 6930 | O | O     | . HOH HOH HOH S | . 246 | 246 | . 103.568 | 89.652  | 18.190  | 1.00 |
| 54.08     | 1 | . . . |                 |       |     |           |         |         |      |
| ATOM 6931 | O | O     | . HOH HOH HOH S | . 247 | 247 | . 77.945  | 114.165 | 23.171  | 1.00 |
| 24.07     | 1 | . . . |                 |       |     |           |         |         |      |
| ATOM 6932 | O | O     | . HOH HOH HOH S | . 248 | 248 | . 89.597  | 66.740  | 22.235  | 1.00 |
| 29.13     | 1 | . . . |                 |       |     |           |         |         |      |
| ATOM 6933 | O | O     | . HOH HOH HOH S | . 249 | 249 | . 118.233 | 94.007  | 33.087  | 1.00 |
| 17.94     | 1 | . . . |                 |       |     |           |         |         |      |
| ATOM 6934 | O | O     | . HOH HOH HOH S | . 250 | 250 | . 118.292 | 95.072  | 36.564  | 1.00 |
| 13.48     | 1 | . . . |                 |       |     |           |         |         |      |
| ATOM 6935 | O | O     | . HOH HOH HOH S | . 251 | 251 | . 108.541 | 115.113 | -4.560  | 1.00 |
| 33.58     | 1 | . . . |                 |       |     |           |         |         |      |
| ATOM 6936 | O | O     | . HOH HOH HOH S | . 252 | 252 | . 76.592  | 95.165  | 41.926  | 1.00 |
| 24.35     | 1 | . . . |                 |       |     |           |         |         |      |
| ATOM 6937 | O | O     | . HOH HOH HOH S | . 253 | 253 | . 67.723  | 84.798  | 21.446  | 1.00 |
| 8.90      | 1 | . . . |                 |       |     |           |         |         |      |
| ATOM 6938 | O | O     | . HOH HOH HOH S | . 254 | 254 | . 101.822 | 97.507  | -12.018 | 1.00 |
| 19.46     | 1 | . . . |                 |       |     |           |         |         |      |
| ATOM 6939 | O | O     | . HOH HOH HOH S | . 255 | 255 | . 98.666  | 115.175 | 0.226   | 1.00 |
| 71.40     | 1 | . . . |                 |       |     |           |         |         |      |
| ATOM 6940 | O | O     | . HOH HOH HOH S | . 256 | 256 | . 67.493  | 80.015  | 23.131  | 1.00 |
| 12.23     | 1 | . . . |                 |       |     |           |         |         |      |
| ATOM 6941 | O | O     | . HOH HOH HOH S | . 257 | 257 | . 112.379 | 109.581 | 40.610  | 1.00 |
| 27.89     | 1 | . . . |                 |       |     |           |         |         |      |
| ATOM 6942 | O | O     | . HOH HOH HOH S | . 258 | 258 | . 78.799  | 73.029  | 31.843  | 1.00 |
| 26.30     | 1 | . . . |                 |       |     |           |         |         |      |
| ATOM 6943 | O | O     | . HOH HOH HOH S | . 259 | 259 | . 85.856  | 98.218  | 44.025  | 1.00 |
| 16.80     | 1 | . . . |                 |       |     |           |         |         |      |
| ATOM 6944 | O | O     | . HOH HOH HOH S | . 260 | 260 | . 121.882 | 104.082 | 35.929  | 1.00 |
| 17.30     | 1 | . . . |                 |       |     |           |         |         |      |
| ATOM 6945 | O | O     | . HOH HOH HOH S | . 261 | 261 | . 105.013 | 92.471  | 17.967  | 1.00 |
| 19.11     | 1 | . . . |                 |       |     |           |         |         |      |
| ATOM 6946 | O | O     | . HOH HOH HOH S | . 262 | 262 | . 101.843 | 92.321  | -11.447 | 1.00 |
| 18.89     | 1 | . . . |                 |       |     |           |         |         |      |
| ATOM 6947 | O | O     | . HOH HOH HOH S | . 263 | 263 | . 65.869  | 97.508  | 8.151   | 1.00 |
| 19.55     | 1 | . . . |                 |       |     |           |         |         |      |
| ATOM 6948 | O | O     | . HOH HOH HOH S | . 264 | 264 | . 93.897  | 79.800  | 1.997   | 1.00 |
| 11.40     | 1 | . . . |                 |       |     |           |         |         |      |
| ATOM 6949 | O | O     | . HOH HOH HOH S | . 265 | 265 | . 94.927  | 105.785 | -18.469 | 1.00 |
| 12.92     | 1 | . . . |                 |       |     |           |         |         |      |
| ATOM 6950 | O | O     | . HOH HOH HOH S | . 266 | 266 | . 76.439  | 108.889 | 34.618  | 1.00 |
| 37.83     | 1 | . . . |                 |       |     |           |         |         |      |
| ATOM 6951 | O | O     | . HOH HOH HOH S | . 268 | 268 | . 75.154  | 101.984 | 40.552  | 1.00 |
| 21.33     | 1 | . . . |                 |       |     |           |         |         |      |
| ATOM 6952 | O | O     | . HOH HOH HOH S | . 270 | 270 | . 91.573  | 87.870  | -8.544  | 1.00 |
| 26.60     | 1 | . . . |                 |       |     |           |         |         |      |
| ATOM 6953 | O | O     | . HOH HOH HOH S | . 271 | 271 | . 82.281  | 109.042 | 40.892  | 1.00 |
| 14.91     | 1 | . . . |                 |       |     |           |         |         |      |
| ATOM 6954 | O | O     | . HOH HOH HOH S | . 272 | 272 | . 71.616  | 84.413  | 33.883  | 1.00 |
| 26.60     | 1 | . . . |                 |       |     |           |         |         |      |



|           |   |       |                 |           |           |         |         |      |
|-----------|---|-------|-----------------|-----------|-----------|---------|---------|------|
| ATOM 6982 | O | O     | . HOH HOH HOH S | . 301 301 | . 88.175  | 96.492  | 41.349  | 1.00 |
| 36.98     | 1 | . . . |                 |           |           |         |         |      |
| ATOM 6983 | O | O     | . HOH HOH HOH S | . 302 302 | . 64.891  | 95.198  | 6.803   | 1.00 |
| 13.83     | 1 | . . . |                 |           |           |         |         |      |
| ATOM 6984 | O | O     | . HOH HOH HOH S | . 303 303 | . 70.918  | 91.277  | 22.066  | 1.00 |
| 12.50     | 1 | . . . |                 |           |           |         |         |      |
| ATOM 6985 | O | O     | . HOH HOH HOH S | . 304 304 | . 69.395  | 103.737 | -9.554  | 1.00 |
| 24.50     | 1 | . . . |                 |           |           |         |         |      |
| ATOM 6986 | O | O     | . HOH HOH HOH S | . 305 305 | . 74.472  | 102.054 | -21.574 | 1.00 |
| 37.56     | 1 | . . . |                 |           |           |         |         |      |
| ATOM 6987 | O | O     | . HOH HOH HOH S | . 306 306 | . 94.104  | 97.791  | 42.953  | 1.00 |
| 21.39     | 1 | . . . |                 |           |           |         |         |      |
| ATOM 6988 | O | O     | . HOH HOH HOH S | . 307 307 | . 58.531  | 106.978 | -1.111  | 1.00 |
| 20.34     | 1 | . . . |                 |           |           |         |         |      |
| ATOM 6989 | O | O     | . HOH HOH HOH S | . 308 308 | . 99.321  | 94.367  | 9.856   | 1.00 |
| 15.33     | 1 | . . . |                 |           |           |         |         |      |
| ATOM 6990 | O | O     | . HOH HOH HOH S | . 309 309 | . 77.412  | 100.317 | 16.804  | 1.00 |
| 3.69      | 1 | . . . |                 |           |           |         |         |      |
| ATOM 6991 | O | O     | . HOH HOH HOH S | . 310 310 | . 78.022  | 97.031  | 10.829  | 1.00 |
| 4.39      | 1 | . . . |                 |           |           |         |         |      |
| ATOM 6992 | O | O     | . HOH HOH HOH S | . 311 311 | . 80.627  | 114.130 | -22.362 | 1.00 |
| 7.56      | 1 | . . . |                 |           |           |         |         |      |
| ATOM 6993 | O | O     | . HOH HOH HOH S | . 312 312 | . 76.512  | 66.437  | 19.853  | 1.00 |
| 6.93      | 1 | . . . |                 |           |           |         |         |      |
| ATOM 6994 | O | O     | . HOH HOH HOH S | . 313 313 | . 81.757  | 109.597 | 45.485  | 1.00 |
| 9.09      | 1 | . . . |                 |           |           |         |         |      |
| ATOM 6995 | O | O     | . HOH HOH HOH S | . 314 314 | . 82.283  | 115.911 | -23.894 | 1.00 |
| 6.88      | 1 | . . . |                 |           |           |         |         |      |
| ATOM 6996 | O | O     | . HOH HOH HOH S | . 315 315 | . 95.161  | 80.254  | 26.926  | 1.00 |
| 6.83      | 1 | . . . |                 |           |           |         |         |      |
| ATOM 6997 | O | O     | . HOH HOH HOH S | . 317 317 | . 117.321 | 101.778 | 25.325  | 1.00 |
| 15.84     | 1 | . . . |                 |           |           |         |         |      |
| ATOM 6998 | O | O     | . HOH HOH HOH S | . 318 318 | . 91.601  | 72.849  | 9.739   | 1.00 |
| 13.33     | 1 | . . . |                 |           |           |         |         |      |
| ATOM 6999 | O | O     | . HOH HOH HOH S | . 319 319 | . 69.094  | 115.866 | 23.978  | 1.00 |
| 12.49     | 1 | . . . |                 |           |           |         |         |      |
| ATOM 7000 | O | O     | . HOH HOH HOH S | . 320 320 | . 70.021  | 99.704  | 16.486  | 1.00 |
| 21.97     | 1 | . . . |                 |           |           |         |         |      |
| ATOM 7001 | O | O     | . HOH HOH HOH S | . 321 321 | . 89.196  | 116.223 | -28.666 | 1.00 |
| 13.60     | 1 | . . . |                 |           |           |         |         |      |
| ATOM 7002 | O | O     | . HOH HOH HOH S | . 322 322 | . 71.715  | 122.315 | -0.915  | 1.00 |
| 12.07     | 1 | . . . |                 |           |           |         |         |      |
| ATOM 7003 | O | O     | . HOH HOH HOH S | . 323 323 | . 87.976  | 104.983 | -17.834 | 1.00 |
| 11.05     | 1 | . . . |                 |           |           |         |         |      |
| ATOM 7004 | O | O     | . HOH HOH HOH S | . 324 324 | . 109.536 | 86.529  | 27.400  | 1.00 |
| 10.33     | 1 | . . . |                 |           |           |         |         |      |
| ATOM 7005 | O | O     | . HOH HOH HOH S | . 325 325 | . 93.713  | 111.476 | -22.441 | 1.00 |
| 19.97     | 1 | . . . |                 |           |           |         |         |      |
| ATOM 7006 | O | O     | . HOH HOH HOH S | . 326 326 | . 92.903  | 106.236 | 42.277  | 1.00 |
| 18.69     | 1 | . . . |                 |           |           |         |         |      |
| ATOM 7007 | O | O     | . HOH HOH HOH S | . 327 327 | . 74.148  | 103.865 | 12.375  | 1.00 |
| 16.39     | 1 | . . . |                 |           |           |         |         |      |
| ATOM 7008 | O | O     | . HOH HOH HOH S | . 328 328 | . 103.914 | 109.320 | 43.797  | 1.00 |
| 13.74     | 1 | . . . |                 |           |           |         |         |      |





|           |   |       |                 |           |           |         |         |      |
|-----------|---|-------|-----------------|-----------|-----------|---------|---------|------|
| ATOM 7036 | O | O     | . HOH HOH HOH S | . 356 356 | . 90.646  | 106.179 | 46.223  | 1.00 |
| 22.38     | 1 | . . . |                 |           |           |         |         |      |
| ATOM 7037 | O | O     | . HOH HOH HOH S | . 357 357 | . 75.483  | 104.463 | 14.603  | 1.00 |
| 26.46     | 1 | . . . |                 |           |           |         |         |      |
| ATOM 7038 | O | O     | . HOH HOH HOH S | . 358 358 | . 107.262 | 106.352 | 43.907  | 1.00 |
| 24.23     | 1 | . . . |                 |           |           |         |         |      |
| ATOM 7039 | O | O     | . HOH HOH HOH S | . 359 359 | . 106.495 | 110.485 | 43.220  | 1.00 |
| 21.73     | 1 | . . . |                 |           |           |         |         |      |
| ATOM 7040 | O | O     | . HOH HOH HOH S | . 360 360 | . 72.747  | 100.290 | 12.750  | 1.00 |
| 33.32     | 1 | . . . |                 |           |           |         |         |      |
| ATOM 7041 | O | O     | . HOH HOH HOH S | . 361 361 | . 79.456  | 68.167  | 22.694  | 1.00 |
| 13.42     | 1 | . . . |                 |           |           |         |         |      |
| ATOM 7042 | O | O     | . HOH HOH HOH S | . 362 362 | . 81.068  | 68.535  | 26.874  | 1.00 |
| 12.03     | 1 | . . . |                 |           |           |         |         |      |
| ATOM 7043 | O | O     | . HOH HOH HOH S | . 363 363 | . 80.820  | 70.904  | 28.790  | 1.00 |
| 18.03     | 1 | . . . |                 |           |           |         |         |      |
| ATOM 7044 | O | O     | . HOH HOH HOH S | . 364 364 | . 83.570  | 65.234  | 22.269  | 1.00 |
| 9.72      | 1 | . . . |                 |           |           |         |         |      |
| ATOM 7045 | O | O     | . HOH HOH HOH S | . 365 365 | . 77.874  | 67.265  | 24.867  | 1.00 |
| 123.61    | 1 | . . . |                 |           |           |         |         |      |
| ATOM 7046 | O | O     | . HOH HOH HOH S | . 366 366 | . 75.581  | 68.264  | 24.197  | 1.00 |
| 15.50     | 1 | . . . |                 |           |           |         |         |      |
| ATOM 7047 | O | O     | . HOH HOH HOH S | . 367 367 | . 96.603  | 77.238  | 4.547   | 1.00 |
| 48.10     | 1 | . . . |                 |           |           |         |         |      |
| ATOM 7048 | O | O     | . HOH HOH HOH S | . 368 368 | . 97.140  | 74.535  | 5.018   | 1.00 |
| 44.00     | 1 | . . . |                 |           |           |         |         |      |
| ATOM 7049 | O | O     | . HOH HOH HOH S | . 369 369 | . 92.231  | 79.612  | -0.085  | 1.00 |
| 19.81     | 1 | . . . |                 |           |           |         |         |      |
| ATOM 7050 | O | O     | . HOH HOH HOH S | . 370 370 | . 66.795  | 118.541 | -4.557  | 1.00 |
| 14.05     | 1 | . . . |                 |           |           |         |         |      |
| ATOM 7051 | O | O     | . HOH HOH HOH S | . 371 371 | . 113.186 | 101.424 | -2.182  | 1.00 |
| 27.71     | 1 | . . . |                 |           |           |         |         |      |
| ATOM 7052 | O | O     | . HOH HOH HOH S | . 372 372 | . 86.241  | 84.522  | 2.715   | 1.00 |
| 20.54     | 1 | . . . |                 |           |           |         |         |      |
| ATOM 7053 | O | O     | . HOH HOH HOH S | . 373 373 | . 72.669  | 92.064  | 8.366   | 1.00 |
| 32.40     | 1 | . . . |                 |           |           |         |         |      |
| ATOM 7054 | O | O     | . HOH HOH HOH S | . 374 374 | . 77.347  | 121.088 | -24.702 | 1.00 |
| 37.93     | 1 | . . . |                 |           |           |         |         |      |
| ATOM 7055 | O | O     | . HOH HOH HOH S | . 375 375 | . 86.146  | 122.110 | -25.885 | 1.00 |
| 53.20     | 1 | . . . |                 |           |           |         |         |      |
| ATOM 7056 | O | O     | . HOH HOH HOH S | . 376 376 | . 88.071  | 120.165 | -25.414 | 1.00 |
| 25.08     | 1 | . . . |                 |           |           |         |         |      |
| ATOM 7057 | O | O     | . HOH HOH HOH S | . 377 377 | . 119.441 | 105.235 | 19.931  | 1.00 |
| 44.95     | 1 | . . . |                 |           |           |         |         |      |
| ATOM 7058 | O | O     | . HOH HOH HOH S | . 378 378 | . 89.058  | 99.174  | -16.297 | 1.00 |
| 27.32     | 1 | . . . |                 |           |           |         |         |      |
| ATOM 7059 | O | O     | . HOH HOH HOH S | . 379 379 | . 92.702  | 96.523  | -16.488 | 1.00 |
| 29.14     | 1 | . . . |                 |           |           |         |         |      |
| ATOM 7060 | O | O     | . HOH HOH HOH S | . 380 380 | . 113.467 | 86.199  | 33.817  | 1.00 |
| 40.09     | 1 | . . . |                 |           |           |         |         |      |
| ATOM 7061 | O | O     | . HOH HOH HOH S | . 381 381 | . 109.244 | 82.209  | 26.984  | 1.00 |
| 39.28     | 1 | . . . |                 |           |           |         |         |      |
| ATOM 7062 | O | O     | . HOH HOH HOH S | . 382 382 | . 96.495  | 108.865 | -26.133 | 1.00 |
| 23.04     | 1 | . . . |                 |           |           |         |         |      |

|           |   |       |                 |       |     |           |         |         |      |
|-----------|---|-------|-----------------|-------|-----|-----------|---------|---------|------|
| ATOM 7063 | O | O     | . HOH HOH HOH S | . 383 | 383 | . 96.151  | 106.363 | -22.313 | 1.00 |
| 32.28     | 1 | . . . |                 |       |     |           |         |         |      |
| ATOM 7064 | O | O     | . HOH HOH HOH S | . 384 | 384 | . 100.052 | 116.632 | -21.910 | 1.00 |
| 18.37     | 1 | . . . |                 |       |     |           |         |         |      |
| ATOM 7065 | O | O     | . HOH HOH HOH S | . 385 | 385 | . 92.146  | 102.541 | 45.230  | 1.00 |
| 26.48     | 1 | . . . |                 |       |     |           |         |         |      |
| ATOM 7066 | O | O     | . HOH HOH HOH S | . 386 | 386 | . 99.803  | 87.048  | 17.334  | 1.00 |
| 17.21     | 1 | . . . |                 |       |     |           |         |         |      |
| ATOM 7067 | O | O     | . HOH HOH HOH S | . 387 | 387 | . 98.480  | 85.531  | 19.108  | 1.00 |
| 16.32     | 1 | . . . |                 |       |     |           |         |         |      |
| ATOM 7068 | O | O     | . HOH HOH HOH S | . 388 | 388 | . 98.754  | 85.397  | 14.691  | 1.00 |
| 21.93     | 1 | . . . |                 |       |     |           |         |         |      |
| ATOM 7069 | O | O     | . HOH HOH HOH S | . 389 | 389 | . 90.638  | 83.896  | -2.123  | 1.00 |
| 13.93     | 1 | . . . |                 |       |     |           |         |         |      |
| ATOM 7070 | O | O     | . HOH HOH HOH S | . 390 | 390 | . 92.280  | 116.475 | 16.085  | 1.00 |
| 15.28     | 1 | . . . |                 |       |     |           |         |         |      |
| ATOM 7071 | O | O     | . HOH HOH HOH S | . 391 | 391 | . 94.671  | 114.774 | 9.536   | 1.00 |
| 21.53     | 1 | . . . |                 |       |     |           |         |         |      |
| ATOM 7072 | O | O     | . HOH HOH HOH S | . 392 | 392 | . 96.834  | 115.910 | 9.835   | 1.00 |
| 16.16     | 1 | . . . |                 |       |     |           |         |         |      |
| ATOM 7073 | O | O     | . HOH HOH HOH S | . 394 | 394 | . 79.373  | 122.102 | 4.703   | 1.00 |
| 15.73     | 1 | . . . |                 |       |     |           |         |         |      |
| ATOM 7074 | O | O     | . HOH HOH HOH S | . 395 | 395 | . 77.855  | 123.832 | 5.549   | 1.00 |
| 31.18     | 1 | . . . |                 |       |     |           |         |         |      |
| ATOM 7075 | O | O     | . HOH HOH HOH S | . 396 | 396 | . 82.731  | 124.455 | 2.828   | 1.00 |
| 39.86     | 1 | . . . |                 |       |     |           |         |         |      |
| ATOM 7076 | O | O     | . HOH HOH HOH S | . 397 | 397 | . 77.139  | 124.448 | 3.137   | 1.00 |
| 16.64     | 1 | . . . |                 |       |     |           |         |         |      |
| ATOM 7077 | O | O     | . HOH HOH HOH S | . 414 | 414 | . 73.935  | 125.561 | -11.402 | 1.00 |
| 26.45     | 1 | . . . |                 |       |     |           |         |         |      |
| ATOM 7078 | O | O     | . HOH HOH HOH S | . 415 | 415 | . 93.354  | 79.117  | 32.168  | 1.00 |
| 17.57     | 1 | . . . |                 |       |     |           |         |         |      |
| ATOM 7079 | O | O     | . HOH HOH HOH S | . 416 | 416 | . 82.922  | 79.541  | 4.510   | 1.00 |
| 14.99     | 1 | . . . |                 |       |     |           |         |         |      |
| ATOM 7080 | O | O     | . HOH HOH HOH S | . 417 | 417 | . 100.379 | 99.631  | -13.343 | 1.00 |
| 28.47     | 1 | . . . |                 |       |     |           |         |         |      |
| ATOM 7081 | O | O     | . HOH HOH HOH S | . 418 | 418 | . 84.034  | 131.133 | -4.979  | 1.00 |
| 28.26     | 1 | . . . |                 |       |     |           |         |         |      |
| ATOM 7082 | O | O     | . HOH HOH HOH S | . 419 | 419 | . 86.841  | 131.289 | -4.449  | 1.00 |
| 22.94     | 1 | . . . |                 |       |     |           |         |         |      |
| ATOM 7083 | O | O     | . HOH HOH HOH S | . 420 | 420 | . 86.297  | 129.529 | -9.252  | 1.00 |
| 16.08     | 1 | . . . |                 |       |     |           |         |         |      |
| ATOM 7084 | O | O     | . HOH HOH HOH S | . 421 | 421 | . 113.699 | 115.581 | 22.697  | 1.00 |
| 28.67     | 1 | . . . |                 |       |     |           |         |         |      |
| ATOM 7085 | O | O     | . HOH HOH HOH S | . 422 | 422 | . 115.270 | 112.564 | 20.356  | 1.00 |
| 22.10     | 1 | . . . |                 |       |     |           |         |         |      |
| ATOM 7086 | O | O     | . HOH HOH HOH S | . 423 | 423 | . 115.143 | 110.938 | 17.319  | 1.00 |
| 41.45     | 1 | . . . |                 |       |     |           |         |         |      |
| ATOM 7087 | O | O     | . HOH HOH HOH S | . 424 | 424 | . 116.060 | 116.737 | 22.873  | 1.00 |
| 13.49     | 1 | . . . |                 |       |     |           |         |         |      |
| ATOM 7088 | O | O     | . HOH HOH HOH S | . 425 | 425 | . 115.618 | 118.951 | 24.104  | 1.00 |
| 21.40     | 1 | . . . |                 |       |     |           |         |         |      |
| ATOM 7089 | O | O     | . HOH HOH HOH S | . 426 | 426 | . 105.175 | 114.684 | -12.797 | 1.00 |
| 73.40     | 1 | . . . |                 |       |     |           |         |         |      |

|           |   |       |                 |           |           |         |        |      |
|-----------|---|-------|-----------------|-----------|-----------|---------|--------|------|
| ATOM 7090 | O | O     | . HOH HOH HOH S | . 427 427 | . 80.089  | 83.164  | 3.620  | 1.00 |
| 18.93     | 1 | . . . |                 |           |           |         |        |      |
| ATOM 7091 | O | O     | . HOH HOH HOH S | . 428 428 | . 86.091  | 119.203 | 8.957  | 1.00 |
| 18.30     | 1 | . . . |                 |           |           |         |        |      |
| ATOM 7092 | O | O     | . HOH HOH HOH S | . 429 429 | . 75.371  | 112.210 | 23.424 | 1.00 |
| 22.36     | 1 | . . . |                 |           |           |         |        |      |
| ATOM 7093 | O | O     | . HOH HOH HOH S | . 430 430 | . 82.335  | 111.575 | 39.542 | 1.00 |
| 16.10     | 1 | . . . |                 |           |           |         |        |      |
| ATOM 7094 | O | O     | . HOH HOH HOH S | . 431 431 | . 78.709  | 110.745 | 38.696 | 1.00 |
| 84.17     | 1 | . . . |                 |           |           |         |        |      |
| ATOM 7095 | O | O     | . HOH HOH HOH S | . 432 432 | . 77.456  | 115.283 | 32.027 | 1.00 |
| 23.47     | 1 | . . . |                 |           |           |         |        |      |
| ATOM 7096 | O | O     | . HOH HOH HOH S | . 433 433 | . 76.084  | 114.660 | 30.543 | 1.00 |
| 27.48     | 1 | . . . |                 |           |           |         |        |      |
| ATOM 7097 | O | O     | . HOH HOH HOH S | . 434 434 | . 101.800 | 124.764 | 21.240 | 1.00 |
| 33.94     | 1 | . . . |                 |           |           |         |        |      |
| ATOM 7098 | O | O     | . HOH HOH HOH S | . 435 435 | . 70.405  | 92.463  | 19.516 | 1.00 |
| 29.03     | 1 | . . . |                 |           |           |         |        |      |
| ATOM 7099 | O | O     | . HOH HOH HOH S | . 436 436 | . 79.274  | 92.728  | 15.526 | 1.00 |
| 19.33     | 1 | . . . |                 |           |           |         |        |      |
| ATOM 7100 | O | O     | . HOH HOH HOH S | . 437 437 | . 121.238 | 100.854 | 38.117 | 1.00 |
| 14.48     | 1 | . . . |                 |           |           |         |        |      |
| ATOM 7101 | O | O     | . HOH HOH HOH S | . 438 438 | . 118.767 | 102.335 | 37.956 | 1.00 |
| 17.67     | 1 | . . . |                 |           |           |         |        |      |
| ATOM 7102 | O | O     | . HOH HOH HOH S | . 439 439 | . 120.599 | 99.043  | 40.526 | 1.00 |
| 23.44     | 1 | . . . |                 |           |           |         |        |      |
| ATOM 7103 | O | O     | . HOH HOH HOH S | . 440 440 | . 120.558 | 100.523 | 43.616 | 1.00 |
| 77.84     | 1 | . . . |                 |           |           |         |        |      |
| ATOM 7104 | O | O     | . HOH HOH HOH S | . 441 441 | . 117.070 | 104.571 | 42.163 | 1.00 |
| 65.16     | 1 | . . . |                 |           |           |         |        |      |
| ATOM 7105 | O | O     | . HOH HOH HOH S | . 442 442 | . 119.138 | 104.823 | 36.348 | 1.00 |
| 21.73     | 1 | . . . |                 |           |           |         |        |      |
| ATOM 7106 | O | O     | . HOH HOH HOH S | . 443 443 | . 120.153 | 93.518  | 34.842 | 1.00 |
| 20.45     | 1 | . . . |                 |           |           |         |        |      |
| ATOM 7107 | O | O     | . HOH HOH HOH S | . 444 444 | . 122.628 | 93.044  | 33.538 | 1.00 |
| 19.16     | 1 | . . . |                 |           |           |         |        |      |
| ATOM 7108 | O | O     | . HOH HOH HOH S | . 445 445 | . 120.359 | 95.344  | 38.609 | 1.00 |
| 17.99     | 1 | . . . |                 |           |           |         |        |      |
| ATOM 7109 | O | O     | . HOH HOH HOH S | . 446 446 | . 76.131  | 128.121 | 10.427 | 1.00 |
| 48.39     | 1 | . . . |                 |           |           |         |        |      |
| ATOM 7110 | O | O     | . HOH HOH HOH S | . 447 447 | . 71.358  | 129.856 | 16.939 | 1.00 |
| 22.67     | 1 | . . . |                 |           |           |         |        |      |
| ATOM 7111 | O | O     | . HOH HOH HOH S | . 448 448 | . 71.373  | 117.069 | 23.061 | 1.00 |
| 24.38     | 1 | . . . |                 |           |           |         |        |      |
| ATOM 7112 | O | O     | . HOH HOH HOH S | . 449 449 | . 96.978  | 97.446  | 45.596 | 1.00 |
| 27.08     | 1 | . . . |                 |           |           |         |        |      |
| ATOM 7113 | O | O     | . HOH HOH HOH S | . 450 450 | . 95.376  | 93.513  | 45.617 | 1.00 |
| 67.76     | 1 | . . . |                 |           |           |         |        |      |
| ATOM 7114 | O | O     | . HOH HOH HOH S | . 451 451 | . 56.341  | 100.386 | 10.767 | 1.00 |
| 24.83     | 1 | . . . |                 |           |           |         |        |      |
| ATOM 7115 | O | O     | . HOH HOH HOH S | . 452 452 | . 99.131  | 92.347  | 13.925 | 1.00 |
| 30.97     | 1 | . . . |                 |           |           |         |        |      |
| ATOM 7116 | O | O     | . HOH HOH HOH S | . 453 453 | . 104.915 | 101.443 | 10.622 | 1.00 |
| 38.48     | 1 | . . . |                 |           |           |         |        |      |

|           |   |       |                 |           |                   |         |      |
|-----------|---|-------|-----------------|-----------|-------------------|---------|------|
| ATOM 7117 | O | O     | . HOH HOH HOH S | . 454 454 | . 104.074 99.615  | 12.902  | 1.00 |
| 31.08     | 1 | . . . |                 |           |                   |         |      |
| ATOM 7118 | O | O     | . HOH HOH HOH S | . 455 455 | . 98.196 106.500  | 12.016  | 1.00 |
| 16.77     | 1 | . . . |                 |           |                   |         |      |
| ATOM 7119 | O | O     | . HOH HOH HOH S | . 456 456 | . 100.501 102.619 | 11.800  | 1.00 |
| 17.12     | 1 | . . . |                 |           |                   |         |      |
| ATOM 7120 | O | O     | . HOH HOH HOH S | . 457 457 | . 81.246 87.180   | -9.099  | 1.00 |
| 22.00     | 1 | . . . |                 |           |                   |         |      |
| ATOM 7121 | O | O     | . HOH HOH HOH S | . 458 458 | . 79.634 85.877   | -5.674  | 1.00 |
| 38.60     | 1 | . . . |                 |           |                   |         |      |
| ATOM 7122 | O | O     | . HOH HOH HOH S | . 459 459 | . 73.565 110.860  | 28.649  | 1.00 |
| 20.16     | 1 | . . . |                 |           |                   |         |      |
| ATOM 7123 | O | O     | . HOH HOH HOH S | . 460 460 | . 72.750 113.172  | 27.064  | 1.00 |
| 72.62     | 1 | . . . |                 |           |                   |         |      |
| ATOM 7124 | O | O     | . HOH HOH HOH S | . 461 461 | . 74.209 112.727  | 30.671  | 1.00 |
| 88.43     | 1 | . . . |                 |           |                   |         |      |
| ATOM 7125 | O | O     | . HOH HOH HOH S | . 462 462 | . 74.161 110.405  | 33.036  | 1.00 |
| 25.74     | 1 | . . . |                 |           |                   |         |      |
| ATOM 7126 | O | O     | . HOH HOH HOH S | . 463 463 | . 72.222 109.182  | 32.289  | 1.00 |
| 21.19     | 1 | . . . |                 |           |                   |         |      |
| ATOM 7127 | O | O     | . HOH HOH HOH S | . 464 464 | . 68.780 80.066   | 32.875  | 1.00 |
| 18.92     | 1 | . . . |                 |           |                   |         |      |
| ATOM 7128 | O | O     | . HOH HOH HOH S | . 465 465 | . 65.784 76.458   | 24.802  | 1.00 |
| 32.61     | 1 | . . . |                 |           |                   |         |      |
| ATOM 7129 | O | O     | . HOH HOH HOH S | . 466 466 | . 67.599 74.904   | 17.740  | 1.00 |
| 77.29     | 1 | . . . |                 |           |                   |         |      |
| ATOM 7130 | O | O     | . HOH HOH HOH S | . 467 467 | . 67.019 70.640   | 20.463  | 1.00 |
| 29.79     | 1 | . . . |                 |           |                   |         |      |
| ATOM 7131 | O | O     | . HOH HOH HOH S | . 468 468 | . 74.659 113.242  | -21.097 | 1.00 |
| 22.20     | 1 | . . . |                 |           |                   |         |      |
| ATOM 7132 | O | O     | . HOH HOH HOH S | . 469 469 | . 74.104 117.544  | -22.994 | 1.00 |
| 24.89     | 1 | . . . |                 |           |                   |         |      |
| ATOM 7133 | O | O     | . HOH HOH HOH S | . 470 470 | . 71.963 113.970  | -22.015 | 1.00 |
| 24.88     | 1 | . . . |                 |           |                   |         |      |
| ATOM 7134 | O | O     | . HOH HOH HOH S | . 471 471 | . 67.702 129.799  | 10.696  | 1.00 |
| 45.30     | 1 | . . . |                 |           |                   |         |      |
| ATOM 7135 | O | O     | . HOH HOH HOH S | . 472 472 | . 55.220 110.160  | -3.325  | 1.00 |
| 34.23     | 1 | . . . |                 |           |                   |         |      |
| ATOM 7136 | O | O     | . HOH HOH HOH S | . 473 473 | . 62.738 108.066  | -1.795  | 1.00 |
| 25.31     | 1 | . . . |                 |           |                   |         |      |
| ATOM 7137 | O | O     | . HOH HOH HOH S | . 474 474 | . 96.433 71.161   | 18.950  | 1.00 |
| 24.43     | 1 | . . . |                 |           |                   |         |      |
| ATOM 7138 | O | O     | . HOH HOH HOH S | . 475 475 | . 94.486 69.977   | 18.744  | 1.00 |
| 34.47     | 1 | . . . |                 |           |                   |         |      |
| ATOM 7139 | O | O     | . HOH HOH HOH S | . 476 476 | . 89.769 76.594   | 29.232  | 1.00 |
| 23.14     | 1 | . . . |                 |           |                   |         |      |
| ATOM 7140 | O | O     | . HOH HOH HOH S | . 477 477 | . 89.074 77.496   | 31.522  | 1.00 |
| 37.93     | 1 | . . . |                 |           |                   |         |      |
| ATOM 7141 | O | O     | . HOH HOH HOH S | . 478 478 | . 90.462 79.796   | 31.960  | 1.00 |
| 13.91     | 1 | . . . |                 |           |                   |         |      |
| ATOM 7142 | O | O     | . HOH HOH HOH S | . 479 479 | . 87.831 119.348  | 15.436  | 1.00 |
| 22.99     | 1 | . . . |                 |           |                   |         |      |
| ATOM 7143 | O | O     | . HOH HOH HOH S | . 480 480 | . 103.457 95.233  | 46.431  | 1.00 |
| 12.96     | 1 | . . . |                 |           |                   |         |      |

|           |   |       |                 |       |     |           |         |         |      |
|-----------|---|-------|-----------------|-------|-----|-----------|---------|---------|------|
| ATOM 7144 | O | O     | . HOH HOH HOH S | . 481 | 481 | . 91.251  | 121.977 | 35.347  | 1.00 |
| 38.63     | 1 | . . . |                 |       |     |           |         |         |      |
| ATOM 7145 | O | O     | . HOH HOH HOH S | . 482 | 482 | . 82.300  | 91.299  | 41.506  | 1.00 |
| 75.96     | 1 | . . . |                 |       |     |           |         |         |      |
| ATOM 7146 | O | O     | . HOH HOH HOH S | . 483 | 483 | . 106.126 | 111.404 | 10.833  | 1.00 |
| 28.37     | 1 | . . . |                 |       |     |           |         |         |      |
| ATOM 7147 | O | O     | . HOH HOH HOH S | . 484 | 484 | . 70.840  | 119.457 | -21.108 | 1.00 |
| 14.51     | 1 | . . . |                 |       |     |           |         |         |      |
| ATOM 7148 | O | O     | . HOH HOH HOH S | . 485 | 485 | . 70.623  | 123.911 | -16.329 | 1.00 |
| 23.33     | 1 | . . . |                 |       |     |           |         |         |      |
| ATOM 7149 | O | O     | . HOH HOH HOH S | . 486 | 486 | . 68.941  | 115.908 | -19.918 | 1.00 |
| 21.76     | 1 | . . . |                 |       |     |           |         |         |      |
| ATOM 7150 | O | O     | . HOH HOH HOH S | . 487 | 487 | . 103.616 | 122.314 | 9.079   | 1.00 |
| 26.91     | 1 | . . . |                 |       |     |           |         |         |      |
| ATOM 7151 | O | O     | . HOH HOH HOH S | . 488 | 488 | . 75.121  | 118.446 | 27.196  | 1.00 |
| 43.25     | 1 | . . . |                 |       |     |           |         |         |      |
| ATOM 7152 | O | O     | . HOH HOH HOH S | . 489 | 489 | . 98.545  | 87.066  | -0.635  | 1.00 |
| 36.73     | 1 | . . . |                 |       |     |           |         |         |      |
| ATOM 7153 | O | O     | . HOH HOH HOH S | . 490 | 490 | . 87.657  | 90.063  | -15.376 | 1.00 |
| 29.53     | 1 | . . . |                 |       |     |           |         |         |      |
| ATOM 7154 | O | O     | . HOH HOH HOH S | . 491 | 491 | . 58.188  | 113.344 | 19.177  | 1.00 |
| 17.43     | 1 | . . . |                 |       |     |           |         |         |      |
| ATOM 7155 | O | O     | . HOH HOH HOH S | . 492 | 492 | . 96.443  | 99.000  | -16.523 | 1.00 |
| 29.53     | 1 | . . . |                 |       |     |           |         |         |      |
| ATOM 7156 | O | O     | . HOH HOH HOH S | . 493 | 493 | . 68.395  | 98.278  | 7.599   | 1.00 |
| 17.09     | 1 | . . . |                 |       |     |           |         |         |      |
| ATOM 7157 | O | O     | . HOH HOH HOH S | . 494 | 494 | . 103.372 | 81.549  | 22.290  | 1.00 |
| 31.85     | 1 | . . . |                 |       |     |           |         |         |      |
| ATOM 7158 | O | O     | . HOH HOH HOH S | . 495 | 495 | . 89.484  | 104.966 | -20.018 | 1.00 |
| 19.97     | 1 | . . . |                 |       |     |           |         |         |      |
| ATOM 7159 | O | O     | . HOH HOH HOH S | . 496 | 496 | . 73.799  | 91.418  | -7.545  | 1.00 |
| 29.79     | 1 | . . . |                 |       |     |           |         |         |      |
| ATOM 7160 | O | O     | . HOH HOH HOH S | . 497 | 497 | . 93.022  | 118.311 | -22.469 | 1.00 |
| 14.86     | 1 | . . . |                 |       |     |           |         |         |      |
| ATOM 7161 | O | O     | . HOH HOH HOH S | . 498 | 498 | . 122.671 | 99.388  | 31.245  | 1.00 |
| 15.81     | 1 | . . . |                 |       |     |           |         |         |      |
| ATOM 7162 | O | O     | . HOH HOH HOH S | . 499 | 499 | . 103.447 | 108.781 | 8.806   | 1.00 |
| 21.71     | 1 | . . . |                 |       |     |           |         |         |      |
| ATOM 7163 | O | O     | . HOH HOH HOH S | . 500 | 500 | . 90.752  | 122.232 | -19.345 | 1.00 |
| 16.70     | 1 | . . . |                 |       |     |           |         |         |      |
| ATOM 7164 | O | O     | . HOH HOH HOH S | . 501 | 501 | . 96.681  | 91.373  | 14.148  | 1.00 |
| 17.22     | 1 | . . . |                 |       |     |           |         |         |      |
| ATOM 7165 | O | O     | . HOH HOH HOH S | . 502 | 502 | . 111.180 | 106.966 | 9.601   | 1.00 |
| 33.32     | 1 | . . . |                 |       |     |           |         |         |      |
| ATOM 7166 | O | O     | . HOH HOH HOH S | . 503 | 503 | . 95.957  | 134.980 | -10.856 | 1.00 |
| 16.46     | 1 | . . . |                 |       |     |           |         |         |      |
| ATOM 7167 | O | O     | . HOH HOH HOH S | . 504 | 504 | . 91.955  | 78.306  | 29.763  | 1.00 |
| 22.09     | 1 | . . . |                 |       |     |           |         |         |      |
| ATOM 7168 | O | O     | . HOH HOH HOH S | . 505 | 505 | . 99.802  | 112.089 | -27.954 | 1.00 |
| 26.10     | 1 | . . . |                 |       |     |           |         |         |      |
| ATOM 7169 | O | O     | . HOH HOH HOH S | . 506 | 506 | . 60.757  | 93.422  | 9.157   | 1.00 |
| 38.95     | 1 | . . . |                 |       |     |           |         |         |      |
| ATOM 7170 | O | O     | . HOH HOH HOH S | . 507 | 507 | . 112.044 | 96.389  | 39.020  | 1.00 |
| 25.07     | 1 | . . . |                 |       |     |           |         |         |      |

|           |   |       |                 |           |           |         |         |      |
|-----------|---|-------|-----------------|-----------|-----------|---------|---------|------|
| ATOM 7171 | O | O     | . HOH HOH HOH S | . 508 508 | . 68.559  | 126.517 | 17.378  | 1.00 |
| 18.74     | 1 | . . . |                 |           |           |         |         |      |
| ATOM 7172 | O | O     | . HOH HOH HOH S | . 509 509 | . 104.049 | 106.342 | -21.154 | 1.00 |
| 15.67     | 1 | . . . |                 |           |           |         |         |      |
| ATOM 7173 | O | O     | . HOH HOH HOH S | . 510 510 | . 105.758 | 97.697  | 6.490   | 1.00 |
| 22.01     | 1 | . . . |                 |           |           |         |         |      |
| ATOM 7174 | O | O     | . HOH HOH HOH S | . 511 511 | . 73.317  | 92.798  | -16.261 | 1.00 |
| 28.02     | 1 | . . . |                 |           |           |         |         |      |
| ATOM 7175 | O | O     | . HOH HOH HOH S | . 512 512 | . 110.547 | 119.840 | 15.259  | 0.50 |
| 42.94     | 1 | . . . |                 |           |           |         |         |      |
| ATOM 7176 | O | O     | . HOH HOH HOH S | . 513 513 | . 77.571  | 110.793 | -21.908 | 1.00 |
| 33.80     | 1 | . . . |                 |           |           |         |         |      |
| ATOM 7177 | O | O     | . HOH HOH HOH S | . 514 514 | . 117.379 | 104.992 | 34.395  | 1.00 |
| 22.90     | 1 | . . . |                 |           |           |         |         |      |
| ATOM 7178 | O | O     | . HOH HOH HOH S | . 515 515 | . 63.223  | 123.546 | 16.038  | 1.00 |
| 13.33     | 1 | . . . |                 |           |           |         |         |      |
| ATOM 7179 | O | O     | . HOH HOH HOH S | . 516 516 | . 75.329  | 125.922 | 21.550  | 1.00 |
| 20.00     | 1 | . . . |                 |           |           |         |         |      |
| ATOM 7180 | O | O     | . HOH HOH HOH S | . 517 517 | . 111.376 | 91.432  | 43.394  | 1.00 |
| 24.15     | 1 | . . . |                 |           |           |         |         |      |
| ATOM 7181 | O | O     | . HOH HOH HOH S | . 518 518 | . 95.797  | 91.112  | 5.266   | 1.00 |
| 32.42     | 1 | . . . |                 |           |           |         |         |      |
| ATOM 7182 | O | O     | . HOH HOH HOH S | . 519 519 | . 101.117 | 118.581 | -4.860  | 1.00 |
| 20.37     | 1 | . . . |                 |           |           |         |         |      |
| ATOM 7183 | O | O     | . HOH HOH HOH S | . 520 520 | . 101.300 | 125.036 | -8.900  | 1.00 |
| 25.73     | 1 | . . . |                 |           |           |         |         |      |
| ATOM 7184 | O | O     | . HOH HOH HOH S | . 521 521 | . 76.156  | 123.784 | 25.621  | 1.00 |
| 27.28     | 1 | . . . |                 |           |           |         |         |      |
| ATOM 7185 | O | O     | . HOH HOH HOH S | . 522 522 | . 84.091  | 118.250 | 35.813  | 1.00 |
| 28.70     | 1 | . . . |                 |           |           |         |         |      |
| ATOM 7186 | O | O     | . HOH HOH HOH S | . 523 523 | . 97.237  | 83.258  | 44.225  | 1.00 |
| 15.63     | 1 | . . . |                 |           |           |         |         |      |
| ATOM 7187 | O | O     | . HOH HOH HOH S | . 524 524 | . 104.042 | 124.741 | 24.435  | 1.00 |
| 27.30     | 1 | . . . |                 |           |           |         |         |      |
| ATOM 7188 | O | O     | . HOH HOH HOH S | . 525 525 | . 62.223  | 86.041  | 28.062  | 1.00 |
| 23.14     | 1 | . . . |                 |           |           |         |         |      |
| ATOM 7189 | O | O     | . HOH HOH HOH S | . 526 526 | . 111.353 | 101.026 | 41.763  | 1.00 |
| 21.45     | 1 | . . . |                 |           |           |         |         |      |
| ATOM 7190 | O | O     | . HOH HOH HOH S | . 527 527 | . 55.264  | 113.201 | 19.271  | 1.00 |
| 38.42     | 1 | . . . |                 |           |           |         |         |      |
| ATOM 7191 | O | O     | . HOH HOH HOH S | . 528 528 | . 71.715  | 99.710  | 25.256  | 1.00 |
| 34.68     | 1 | . . . |                 |           |           |         |         |      |
| ATOM 7192 | O | O     | . HOH HOH HOH S | . 529 529 | . 102.914 | 113.892 | 39.594  | 1.00 |
| 20.19     | 1 | . . . |                 |           |           |         |         |      |
| ATOM 7193 | O | O     | . HOH HOH HOH S | . 530 530 | . 70.507  | 111.687 | 24.749  | 1.00 |
| 34.85     | 1 | . . . |                 |           |           |         |         |      |
| ATOM 7194 | O | O     | . HOH HOH HOH S | . 531 531 | . 100.107 | 87.860  | -6.775  | 1.00 |
| 46.12     | 1 | . . . |                 |           |           |         |         |      |
| ATOM 7195 | O | O     | . HOH HOH HOH S | . 532 532 | . 112.319 | 110.514 | 15.733  | 1.00 |
| 33.36     | 1 | . . . |                 |           |           |         |         |      |
| ATOM 7196 | O | O     | . HOH HOH HOH S | . 533 533 | . 70.151  | 104.798 | 24.228  | 1.00 |
| 23.22     | 1 | . . . |                 |           |           |         |         |      |
| ATOM 7197 | O | O     | . HOH HOH HOH S | . 534 534 | . 109.114 | 93.300  | 19.028  | 1.00 |
| 17.93     | 1 | . . . |                 |           |           |         |         |      |

|           |   |       |                 |           |           |         |         |      |
|-----------|---|-------|-----------------|-----------|-----------|---------|---------|------|
| ATOM 7198 | O | O     | . HOH HOH HOH S | . 537 537 | . 85.882  | 73.466  | 30.454  | 1.00 |
| 30.59     | 1 | . . . |                 |           |           |         |         |      |
| ATOM 7199 | O | O     | . HOH HOH HOH S | . 538 538 | . 95.856  | 103.834 | 31.589  | 1.00 |
| 15.61     | 1 | . . . |                 |           |           |         |         |      |
| ATOM 7200 | O | O     | . HOH HOH HOH S | . 539 539 | . 66.451  | 129.797 | 0.852   | 1.00 |
| 22.70     | 1 | . . . |                 |           |           |         |         |      |
| ATOM 7201 | O | O     | . HOH HOH HOH S | . 540 540 | . 72.160  | 128.366 | 10.044  | 1.00 |
| 56.81     | 1 | . . . |                 |           |           |         |         |      |
| ATOM 7202 | O | O     | . HOH HOH HOH S | . 541 541 | . 109.425 | 117.424 | 12.608  | 1.00 |
| 23.36     | 1 | . . . |                 |           |           |         |         |      |
| ATOM 7203 | O | O     | . HOH HOH HOH S | . 542 542 | . 55.097  | 114.767 | -0.609  | 1.00 |
| 24.26     | 1 | . . . |                 |           |           |         |         |      |
| ATOM 7204 | O | O     | . HOH HOH HOH S | . 543 543 | . 84.281  | 119.884 | 11.414  | 1.00 |
| 36.94     | 1 | . . . |                 |           |           |         |         |      |
| ATOM 7205 | O | O     | . HOH HOH HOH S | . 544 544 | . 88.434  | 118.338 | 8.991   | 1.00 |
| 29.42     | 1 | . . . |                 |           |           |         |         |      |
| ATOM 7206 | O | O     | . HOH HOH HOH S | . 545 545 | . 65.703  | 112.221 | -11.041 | 1.00 |
| 19.13     | 1 | . . . |                 |           |           |         |         |      |
| ATOM 7207 | O | O     | . HOH HOH HOH S | . 546 546 | . 54.838  | 115.410 | 1.951   | 1.00 |
| 28.39     | 1 | . . . |                 |           |           |         |         |      |
| ATOM 7208 | O | O     | . HOH HOH HOH S | . 547 547 | . 117.561 | 112.173 | 21.630  | 1.00 |
| 34.87     | 1 | . . . |                 |           |           |         |         |      |
| ATOM 7209 | O | O     | . HOH HOH HOH S | . 548 548 | . 84.816  | 125.817 | 0.899   | 1.00 |
| 21.56     | 1 | . . . |                 |           |           |         |         |      |
| ATOM 7210 | O | O     | . HOH HOH HOH S | . 549 549 | . 86.193  | 123.445 | 0.996   | 1.00 |
| 38.35     | 1 | . . . |                 |           |           |         |         |      |
| ATOM 7211 | O | O     | . HOH HOH HOH S | . 550 550 | . 99.776  | 77.008  | 3.163   | 1.00 |
| 27.25     | 1 | . . . |                 |           |           |         |         |      |
| ATOM 7212 | O | O     | . HOH HOH HOH S | . 552 552 | . 77.575  | 111.215 | 36.334  | 1.00 |
| 18.15     | 1 | . . . |                 |           |           |         |         |      |
| ATOM 7213 | O | O     | . HOH HOH HOH S | . 553 553 | . 53.032  | 113.915 | 17.850  | 1.00 |
| 30.98     | 1 | . . . |                 |           |           |         |         |      |
| ATOM 7214 | O | O     | . HOH HOH HOH S | . 554 554 | . 48.420  | 111.133 | 7.370   | 1.00 |
| 33.92     | 1 | . . . |                 |           |           |         |         |      |
| ATOM 7215 | O | O     | . HOH HOH HOH S | . 555 555 | . 84.199  | 121.717 | 30.235  | 1.00 |
| 20.50     | 1 | . . . |                 |           |           |         |         |      |
| ATOM 7216 | O | O     | . HOH HOH HOH S | . 556 556 | . 68.941  | 92.378  | 23.916  | 1.00 |
| 14.65     | 1 | . . . |                 |           |           |         |         |      |
| ATOM 7217 | O | O     | . HOH HOH HOH S | . 557 557 | . 74.584  | 69.865  | 26.473  | 1.00 |
| 18.85     | 1 | . . . |                 |           |           |         |         |      |
| ATOM 7218 | O | O     | . HOH HOH HOH S | . 558 558 | . 61.316  | 98.080  | -8.667  | 1.00 |
| 30.17     | 1 | . . . |                 |           |           |         |         |      |
| ATOM 7219 | O | O     | . HOH HOH HOH S | . 559 559 | . 113.947 | 95.109  | 17.083  | 1.00 |
| 30.65     | 1 | . . . |                 |           |           |         |         |      |
| ATOM 7220 | O | O     | . HOH HOH HOH S | . 561 561 | . 112.358 | 89.048  | 23.841  | 1.00 |
| 20.57     | 1 | . . . |                 |           |           |         |         |      |
| ATOM 7221 | O | O     | . HOH HOH HOH S | . 562 562 | . 65.171  | 88.966  | 31.745  | 1.00 |
| 45.74     | 1 | . . . |                 |           |           |         |         |      |
| ATOM 7222 | O | O     | . HOH HOH HOH S | . 563 563 | . 91.771  | 92.032  | -15.414 | 1.00 |
| 21.94     | 1 | . . . |                 |           |           |         |         |      |
| ATOM 7223 | O | O     | . HOH HOH HOH S | . 564 564 | . 105.703 | 133.807 | -0.459  | 1.00 |
| 22.12     | 1 | . . . |                 |           |           |         |         |      |
| ATOM 7224 | O | O     | . HOH HOH HOH S | . 565 565 | . 76.987  | 74.879  | 8.149   | 1.00 |
| 23.71     | 1 | . . . |                 |           |           |         |         |      |



|           |   |       |                 |           |           |         |         |      |
|-----------|---|-------|-----------------|-----------|-----------|---------|---------|------|
| ATOM 7225 | O | O     | . HOH HOH HOH S | . 566 566 | . 91.131  | 98.242  | 43.247  | 1.00 |
| 18.23     | 1 | . . . |                 |           |           |         |         |      |
| ATOM 7226 | O | O     | . HOH HOH HOH S | . 567 567 | . 92.126  | 114.920 | 11.223  | 1.00 |
| 21.95     | 1 | . . . |                 |           |           |         |         |      |
| ATOM 7227 | O | O     | . HOH HOH HOH S | . 568 568 | . 73.353  | 92.854  | 22.239  | 1.00 |
| 19.05     | 1 | . . . |                 |           |           |         |         |      |
| ATOM 7228 | O | O     | . HOH HOH HOH S | . 569 569 | . 82.139  | 97.486  | 41.006  | 1.00 |
| 64.31     | 1 | . . . |                 |           |           |         |         |      |
| ATOM 7229 | O | O     | . HOH HOH HOH S | . 570 570 | . 95.846  | 78.478  | 29.405  | 1.00 |
| 23.83     | 1 | . . . |                 |           |           |         |         |      |
| ATOM 7230 | O | O     | . HOH HOH HOH S | . 572 572 | . 102.482 | 80.095  | 32.360  | 1.00 |
| 24.83     | 1 | . . . |                 |           |           |         |         |      |
| ATOM 7231 | O | O     | . HOH HOH HOH S | . 573 573 | . 89.768  | 72.419  | 28.110  | 1.00 |
| 51.08     | 1 | . . . |                 |           |           |         |         |      |
| ATOM 7232 | O | O     | . HOH HOH HOH S | . 574 574 | . 86.960  | 124.814 | 26.439  | 1.00 |
| 40.90     | 1 | . . . |                 |           |           |         |         |      |
| ATOM 7233 | O | O     | . HOH HOH HOH S | . 575 575 | . 85.899  | 71.742  | 10.735  | 1.00 |
| 48.48     | 1 | . . . |                 |           |           |         |         |      |
| ATOM 7234 | O | O     | . HOH HOH HOH S | . 576 576 | . 98.929  | 117.895 | 33.882  | 1.00 |
| 34.64     | 1 | . . . |                 |           |           |         |         |      |
| ATOM 7235 | O | O     | . HOH HOH HOH S | . 577 577 | . 108.394 | 118.185 | 10.093  | 1.00 |
| 23.17     | 1 | . . . |                 |           |           |         |         |      |
| ATOM 7236 | O | O     | . HOH HOH HOH S | . 578 578 | . 77.523  | 126.988 | 3.439   | 1.00 |
| 22.29     | 1 | . . . |                 |           |           |         |         |      |
| ATOM 7237 | O | O     | . HOH HOH HOH S | . 580 580 | . 83.244  | 76.781  | 33.901  | 1.00 |
| 38.00     | 1 | . . . |                 |           |           |         |         |      |
| ATOM 7238 | O | O     | . HOH HOH HOH S | . 581 581 | . 105.931 | 104.153 | -14.345 | 1.00 |
| 30.66     | 1 | . . . |                 |           |           |         |         |      |
| ATOM 7239 | O | O     | . HOH HOH HOH S | . 583 583 | . 73.334  | 91.862  | 4.657   | 1.00 |
| 30.82     | 1 | . . . |                 |           |           |         |         |      |
| ATOM 7240 | O | O     | . HOH HOH HOH S | . 584 584 | . 82.118  | 126.373 | 14.328  | 1.00 |
| 28.91     | 1 | . . . |                 |           |           |         |         |      |
| ATOM 7241 | O | O     | . HOH HOH HOH S | . 585 585 | . 111.109 | 97.110  | 45.831  | 1.00 |
| 25.78     | 1 | . . . |                 |           |           |         |         |      |
| ATOM 7242 | O | O     | . HOH HOH HOH S | . 586 586 | . 107.317 | 123.265 | 13.035  | 1.00 |
| 36.73     | 1 | . . . |                 |           |           |         |         |      |
| ATOM 7243 | O | O     | . HOH HOH HOH S | . 589 589 | . 76.143  | 100.274 | 45.062  | 1.00 |
| 27.50     | 1 | . . . |                 |           |           |         |         |      |
| ATOM 7244 | O | O     | . HOH HOH HOH S | . 591 591 | . 81.751  | 92.148  | -14.313 | 1.00 |
| 19.46     | 1 | . . . |                 |           |           |         |         |      |
| ATOM 7245 | O | O     | . HOH HOH HOH S | . 592 592 | . 66.800  | 97.159  | -12.967 | 1.00 |
| 39.07     | 1 | . . . |                 |           |           |         |         |      |
| ATOM 7246 | O | O     | . HOH HOH HOH S | . 593 593 | . 107.002 | 92.056  | 46.679  | 1.00 |
| 20.29     | 1 | . . . |                 |           |           |         |         |      |
| ATOM 7247 | O | O     | . HOH HOH HOH S | . 594 594 | . 76.893  | 93.892  | -15.192 | 1.00 |
| 40.51     | 1 | . . . |                 |           |           |         |         |      |
| ATOM 7248 | O | O     | . HOH HOH HOH S | . 596 596 | . 103.036 | 91.577  | -1.079  | 1.00 |
| 27.26     | 1 | . . . |                 |           |           |         |         |      |
| ATOM 7249 | O | O     | . HOH HOH HOH S | . 597 597 | . 114.031 | 105.384 | 41.734  | 1.00 |
| 27.98     | 1 | . . . |                 |           |           |         |         |      |
| ATOM 7250 | O | O     | . HOH HOH HOH S | . 598 598 | . 72.021  | 81.163  | -3.697  | 1.00 |
| 35.70     | 1 | . . . |                 |           |           |         |         |      |
| ATOM 7251 | O | O     | . HOH HOH HOH S | . 599 599 | . 105.706 | 98.723  | 8.857   | 1.00 |
| 20.98     | 1 | . . . |                 |           |           |         |         |      |

|           |   |       |                 |           |                   |         |      |
|-----------|---|-------|-----------------|-----------|-------------------|---------|------|
| ATOM 7252 | O | O     | . HOH HOH HOH S | . 601 601 | . 87.884 81.939   | -0.159  | 1.00 |
| 25.25     | 1 | . . . |                 |           |                   |         |      |
| ATOM 7253 | O | O     | . HOH HOH HOH S | . 602 602 | . 94.043 101.137  | -17.398 | 1.00 |
| 21.38     | 1 | . . . |                 |           |                   |         |      |
| ATOM 7254 | O | O     | . HOH HOH HOH S | . 603 603 | . 106.346 124.141 | -4.116  | 1.00 |
| 29.62     | 1 | . . . |                 |           |                   |         |      |
| ATOM 7255 | O | O     | . HOH HOH HOH S | . 604 604 | . 98.127 90.579   | -12.905 | 1.00 |
| 28.45     | 1 | . . . |                 |           |                   |         |      |
| ATOM 7256 | O | O     | . HOH HOH HOH S | . 605 605 | . 90.610 122.028  | -27.170 | 1.00 |
| 51.40     | 1 | . . . |                 |           |                   |         |      |
| ATOM 7257 | O | O     | . HOH HOH HOH S | . 606 606 | . 80.941 110.249  | 43.226  | 1.00 |
| 21.64     | 1 | . . . |                 |           |                   |         |      |
| ATOM 7258 | O | O     | . HOH HOH HOH S | . 607 607 | . 76.725 93.150   | 16.417  | 1.00 |
| 21.94     | 1 | . . . |                 |           |                   |         |      |
| ATOM 7259 | O | O     | . HOH HOH HOH S | . 608 608 | . 74.086 96.791   | 21.417  | 1.00 |
| 35.32     | 1 | . . . |                 |           |                   |         |      |
| ATOM 7260 | O | O     | . HOH HOH HOH S | . 609 609 | . 71.764 92.895   | 36.994  | 1.00 |
| 15.94     | 1 | . . . |                 |           |                   |         |      |
| ATOM 7261 | O | O     | . HOH HOH HOH S | . 612 612 | . 76.514 83.033   | -0.757  | 1.00 |
| 33.86     | 1 | . . . |                 |           |                   |         |      |
| ATOM 7262 | O | O     | . HOH HOH HOH S | . 613 613 | . 110.224 98.817  | -2.901  | 1.00 |
| 37.21     | 1 | . . . |                 |           |                   |         |      |
| ATOM 7263 | O | O     | . HOH HOH HOH S | . 614 614 | . 93.958 123.661  | 19.810  | 1.00 |
| 41.67     | 1 | . . . |                 |           |                   |         |      |
| ATOM 7264 | O | O     | . HOH HOH HOH S | . 615 615 | . 114.310 101.025 | 39.362  | 1.00 |
| 56.14     | 1 | . . . |                 |           |                   |         |      |
| ATOM 7265 | O | O     | . HOH HOH HOH S | . 616 616 | . 102.740 116.325 | 37.412  | 1.00 |
| 29.73     | 1 | . . . |                 |           |                   |         |      |
| ATOM 7266 | O | O     | . HOH HOH HOH S | . 617 617 | . 114.474 118.072 | 26.255  | 1.00 |
| 28.97     | 1 | . . . |                 |           |                   |         |      |
| ATOM 7267 | O | O     | . HOH HOH HOH S | . 618 618 | . 96.778 120.832  | 13.622  | 1.00 |
| 30.49     | 1 | . . . |                 |           |                   |         |      |
| ATOM 7268 | O | O     | . HOH HOH HOH S | . 620 620 | . 84.049 83.100   | 39.195  | 1.00 |
| 54.88     | 1 | . . . |                 |           |                   |         |      |
| ATOM 7269 | O | O     | . HOH HOH HOH S | . 621 621 | . 96.055 111.246  | -27.057 | 1.00 |
| 27.03     | 1 | . . . |                 |           |                   |         |      |
| ATOM 7270 | O | O     | . HOH HOH HOH S | . 623 623 | . 77.708 107.605  | -21.565 | 1.00 |
| 16.01     | 1 | . . . |                 |           |                   |         |      |
| ATOM 7271 | O | O     | . HOH HOH HOH S | . 626 626 | . 57.235 108.921  | 20.480  | 1.00 |
| 40.26     | 1 | . . . |                 |           |                   |         |      |
| ATOM 7272 | O | O     | . HOH HOH HOH S | . 630 630 | . 86.486 83.524   | 41.720  | 1.00 |
| 24.46     | 1 | . . . |                 |           |                   |         |      |
| ATOM 7273 | O | O     | . HOH HOH HOH S | . 632 632 | . 79.714 88.416   | -7.070  | 1.00 |
| 53.33     | 1 | . . . |                 |           |                   |         |      |
| ATOM 7274 | O | O     | . HOH HOH HOH S | . 633 633 | . 72.628 89.814   | 38.882  | 1.00 |
| 26.51     | 1 | . . . |                 |           |                   |         |      |
| ATOM 7275 | O | O     | . HOH HOH HOH S | . 634 634 | . 102.678 118.634 | -17.871 | 1.00 |
| 35.37     | 1 | . . . |                 |           |                   |         |      |
| ATOM 7276 | O | O     | . HOH HOH HOH S | . 635 635 | . 71.672 96.815   | 7.681   | 1.00 |
| 27.17     | 1 | . . . |                 |           |                   |         |      |
| ATOM 7277 | O | O     | . HOH HOH HOH S | . 636 636 | . 84.477 92.639   | -15.393 | 1.00 |
| 26.28     | 1 | . . . |                 |           |                   |         |      |

#

loop\_

```

_atom_site_anisotrop.id
_atom_site_anisotrop.pdbx_auth_atom_id
_atom_site_anisotrop.pdbx_label_atom_id
_atom_site_anisotrop.pdbx_label_alt_id
_atom_site_anisotrop.pdbx_auth_comp_id
_atom_site_anisotrop.pdbx_label_comp_id
_atom_site_anisotrop.pdbx_orig_comp_id
_atom_site_anisotrop.pdbx_auth_asym_id
_atom_site_anisotrop.pdbx_label_asym_id
_atom_site_anisotrop.pdbx_auth_seq_id
_atom_site_anisotrop.pdbx_label_seq_id
_atom_site_anisotrop.pdbx_PDB_ins_code
_atom_site_anisotrop.U[1][1]
_atom_site_anisotrop.U[2][2]
_atom_site_anisotrop.U[3][3]
_atom_site_anisotrop.U[1][2]
_atom_site_anisotrop.U[1][3]
_atom_site_anisotrop.U[2][3]
_atom_site_anisotrop.pdbx_PDB_model_num
_atom_site_anisotrop.type_symbol
1  N  N  . SER SER SER A A 1 1 . 0.1941 0.1464 0.1961 -0.0077
0.0076 -0.0099 1 .
2  CA CA . SER SER SER A A 1 1 . 0.2077 0.1588 0.2098 -0.0061
0.0142 -0.0030 1 .
3  CB CB . SER SER SER A A 1 1 . 0.2097 0.1802 0.2318 -0.0163
0.0107 0.0036 1 .
4  OG OG . SER SER SER A A 1 1 . 0.2973 0.1943 0.2270 -0.0501 -
0.0178 0.0184 1 .
5  C  C  . SER SER SER A A 1 1 . 0.1686 0.1478 0.1952 0.0020
0.0120 0.0034 1 .
6  O  O  . SER SER SER A A 1 1 . 0.1863 0.1011 0.1786 0.0172
0.0192 -0.0134 1 .
7  N  N  . ILE ILE ILE A A 2 2 . 0.1811 0.1225 0.1631 0.0040
0.0245 0.0003 1 .
8  CA CA . ILE ILE ILE A A 2 2 . 0.1195 0.0794 0.1222 0.0006
0.0131 -0.0010 1 .
9  CB CB . ILE ILE ILE A A 2 2 . 0.1403 0.0649 0.1211 -0.0055
0.0175 0.0154 1 .
10 CG1 CG1 . ILE ILE ILE A A 2 2 . 0.1124 0.0900 0.0989 -0.0043
0.0241 -0.0243 1 .
11 CD1 CD1 . ILE ILE ILE A A 2 2 . 0.1237 0.0746 0.1566 0.0040
0.0134 -0.0263 1 .
12 CG2 CG2 . ILE ILE ILE A A 2 2 . 0.0933 0.0429 0.1058 0.0066
0.0184 0.0205 1 .
13 C  C  . ILE ILE ILE A A 2 2 . 0.1215 0.0987 0.1354 -0.0038
0.0108 0.0007 1 .
14 O  O  . ILE ILE ILE A A 2 2 . 0.0886 0.0740 0.1220 -0.0225
0.0276 -0.0053 1 .
15 N  N  . GLN GLN GLN A A 3 3 . 0.0945 0.0787 0.1410 0.0007
0.0045 0.0018 1 .
16 CA CA . GLN GLN GLN A A 3 3 . 0.1052 0.0744 0.1401 -0.0016
0.0035 -0.0051 1 .
17 CB CB . GLN GLN GLN A A 3 3 . 0.1231 0.0720 0.1532 0.0068
0.0027 -0.0023 1 .

```



|    |        |         |                         |        |        |        |         |   |
|----|--------|---------|-------------------------|--------|--------|--------|---------|---|
| 45 | CD1    | CD1     | . TRP TRP TRP A A 6 6 . | 0.1479 | 0.1209 | 0.1120 | -0.0339 | - |
|    | 0.0007 | -0.0067 | 1 .                     |        |        |        |         |   |
| 46 | NE1    | NE1     | . TRP TRP TRP A A 6 6 . | 0.0885 | 0.1364 | 0.0674 | -0.0193 | - |
|    | 0.0349 | 0.0030  | 1 .                     |        |        |        |         |   |
| 47 | CE2    | CE2     | . TRP TRP TRP A A 6 6 . | 0.1310 | 0.1170 | 0.1417 | 0.0254  |   |
|    | 0.0109 | -0.0037 | 1 .                     |        |        |        |         |   |
| 48 | CD2    | CD2     | . TRP TRP TRP A A 6 6 . | 0.0952 | 0.0775 | 0.0817 | -0.0345 | - |
|    | 0.0197 | -0.0252 | 1 .                     |        |        |        |         |   |
| 49 | CE3    | CE3     | . TRP TRP TRP A A 6 6 . | 0.1542 | 0.0718 | 0.1064 | 0.0010  | - |
|    | 0.0001 | 0.0218  | 1 .                     |        |        |        |         |   |
| 50 | CZ3    | CZ3     | . TRP TRP TRP A A 6 6 . | 0.0994 | 0.0802 | 0.1678 | -0.0358 | - |
|    | 0.0161 | -0.0147 | 1 .                     |        |        |        |         |   |
| 51 | CH2    | CH2     | . TRP TRP TRP A A 6 6 . | 0.1280 | 0.1100 | 0.1155 | -0.0001 | - |
|    | 0.0221 | -0.0193 | 1 .                     |        |        |        |         |   |
| 52 | CZ2    | CZ2     | . TRP TRP TRP A A 6 6 . | 0.1417 | 0.1060 | 0.0880 | -0.0192 | - |
|    | 0.0094 | -0.0259 | 1 .                     |        |        |        |         |   |
| 53 | C      | C       | . TRP TRP TRP A A 6 6 . | 0.0267 | 0.0253 | 0.0263 | 0.0000  |   |
|    | 0.0012 | 0.0000  | 1 .                     |        |        |        |         |   |
| 54 | O      | O       | . TRP TRP TRP A A 6 6 . | 0.0325 | 0.0273 | 0.0598 | -0.0012 |   |
|    | 0.0099 | -0.0077 | 1 .                     |        |        |        |         |   |
| 55 | N      | N       | . ALA ALA ALA A A 7 7 . | 0.0410 | 0.0404 | 0.0473 | -0.0147 | - |
|    | 0.0032 | 0.0083  | 1 .                     |        |        |        |         |   |
| 56 | CA     | CA      | . ALA ALA ALA A A 7 7 . | 0.0335 | 0.0275 | 0.0309 | -0.0043 | - |
|    | 0.0068 | 0.0035  | 1 .                     |        |        |        |         |   |
| 57 | CB     | CB      | . ALA ALA ALA A A 7 7 . | 0.0575 | 0.0514 | 0.0420 | -0.0126 | - |
|    | 0.0202 | 0.0171  | 1 .                     |        |        |        |         |   |
| 58 | C      | C       | . ALA ALA ALA A A 7 7 . | 0.0353 | 0.0265 | 0.0293 | -0.0035 | - |
|    | 0.0063 | 0.0022  | 1 .                     |        |        |        |         |   |
| 59 | O      | O       | . ALA ALA ALA A A 7 7 . | 0.0423 | 0.0283 | 0.0271 | 0.0066  | - |
|    | 0.0050 | -0.0015 | 1 .                     |        |        |        |         |   |
| 60 | N      | N       | . ARG ARG ARG A A 8 8 . | 0.0290 | 0.0254 | 0.0280 | 0.0000  | - |
|    | 0.0030 | -0.0001 | 1 .                     |        |        |        |         |   |
| 61 | CA     | CA      | . ARG ARG ARG A A 8 8 . | 0.0262 | 0.0254 | 0.0273 | -0.0002 |   |
|    | 0.0013 | -0.0004 | 1 .                     |        |        |        |         |   |
| 62 | CB     | CB      | . ARG ARG ARG A A 8 8 . | 0.0253 | 0.0253 | 0.0253 | 0.0000  |   |
|    | 0.0000 | 0.0000  | 1 .                     |        |        |        |         |   |
| 63 | CG     | CG      | . ARG ARG ARG A A 8 8 . | 0.0722 | 0.0285 | 0.0431 | 0.0048  |   |
|    | 0.0002 | 0.0069  | 1 .                     |        |        |        |         |   |
| 64 | CD     | CD      | . ARG ARG ARG A A 8 8 . | 0.0337 | 0.0264 | 0.0325 | -0.0029 | - |
|    | 0.0078 | 0.0027  | 1 .                     |        |        |        |         |   |
| 65 | NE     | NE      | . ARG ARG ARG A A 8 8 . | 0.0323 | 0.0357 | 0.0255 | -0.0016 | - |
|    | 0.0001 | 0.0015  | 1 .                     |        |        |        |         |   |
| 66 | CZ     | CZ      | . ARG ARG ARG A A 8 8 . | 0.0259 | 0.0336 | 0.0276 | 0.0023  | - |
|    | 0.0005 | -0.0023 | 1 .                     |        |        |        |         |   |
| 67 | NH1    | NH1     | . ARG ARG ARG A A 8 8 . | 0.0416 | 0.0328 | 0.0814 | -0.0005 | - |
|    | 0.0248 | -0.0108 | 1 .                     |        |        |        |         |   |
| 68 | NH2    | NH2     | . ARG ARG ARG A A 8 8 . | 0.0414 | 0.0541 | 0.0493 | 0.0058  |   |
|    | 0.0021 | 0.0070  | 1 .                     |        |        |        |         |   |
| 69 | C      | C       | . ARG ARG ARG A A 8 8 . | 0.0272 | 0.0392 | 0.0309 | 0.0050  |   |
|    | 0.0013 | 0.0046  | 1 .                     |        |        |        |         |   |
| 70 | O      | O       | . ARG ARG ARG A A 8 8 . | 0.0293 | 0.0269 | 0.0259 | -0.0025 |   |
|    | 0.0015 | -0.0009 | 1 .                     |        |        |        |         |   |
| 71 | N      | N       | . GLU GLU GLU A A 9 9 . | 0.0302 | 0.0341 | 0.0341 | 0.0050  |   |
|    | 0.0001 | 0.0057  | 1 .                     |        |        |        |         |   |



























|     |     |     |                           |        |        |        |         |   |
|-----|-----|-----|---------------------------|--------|--------|--------|---------|---|
| 369 | CA  | CA  | . ARG ARG ARG A A 49 49 . | 0.0649 | 0.0530 | 0.0443 | -0.0015 |   |
|     |     |     | 0.0117 -0.0052 1 .        |        |        |        |         |   |
| 370 | CB  | CB  | . ARG ARG ARG A A 49 49 . | 0.0816 | 0.0325 | 0.0620 | 0.0137  |   |
|     |     |     | 0.0022 -0.0056 1 .        |        |        |        |         |   |
| 371 | CG  | CG  | . ARG ARG ARG A A 49 49 . | 0.1384 | 0.0385 | 0.1078 | -0.0148 |   |
|     |     |     | 0.0216 -0.0325 1 .        |        |        |        |         |   |
| 372 | CD  | CD  | . ARG ARG ARG A A 49 49 . | 0.1255 | 0.1220 | 0.1517 | 0.0560  |   |
|     |     |     | 0.0065 -0.0492 1 .        |        |        |        |         |   |
| 373 | NE  | NE  | . ARG ARG ARG A A 49 49 . | 0.0858 | 0.0685 | 0.0808 | 0.0286  | - |
|     |     |     | 0.0012 -0.0305 1 .        |        |        |        |         |   |
| 374 | CZ  | CZ  | . ARG ARG ARG A A 49 49 . | 0.0661 | 0.0708 | 0.0619 | 0.0260  | - |
|     |     |     | 0.0006 -0.0329 1 .        |        |        |        |         |   |
| 375 | NH1 | NH1 | . ARG ARG ARG A A 49 49 . | 0.0594 | 0.0482 | 0.1027 | -0.0094 |   |
|     |     |     | 0.0000 -0.0103 1 .        |        |        |        |         |   |
| 376 | NH2 | NH2 | . ARG ARG ARG A A 49 49 . | 0.0703 | 0.0591 | 0.0799 | 0.0109  | - |
|     |     |     | 0.0041 -0.0421 1 .        |        |        |        |         |   |
| 377 | C   | C   | . ARG ARG ARG A A 49 49 . | 0.0580 | 0.0437 | 0.0472 | 0.0177  |   |
|     |     |     | 0.0050 0.0014 1 .         |        |        |        |         |   |
| 378 | O   | O   | . ARG ARG ARG A A 49 49 . | 0.0904 | 0.0609 | 0.0548 | 0.0337  | - |
|     |     |     | 0.0067 -0.0083 1 .        |        |        |        |         |   |
| 379 | N   | N   | . ASP ASP ASP A A 50 50 . | 0.0569 | 0.0310 | 0.0397 | 0.0044  |   |
|     |     |     | 0.0106 -0.0059 1 .        |        |        |        |         |   |
| 380 | CA  | CA  | . ASP ASP ASP A A 50 50 . | 0.0608 | 0.0570 | 0.0539 | 0.0108  | - |
|     |     |     | 0.0046 -0.0150 1 .        |        |        |        |         |   |
| 381 | CB  | CB  | . ASP ASP ASP A A 50 50 . | 0.0426 | 0.0269 | 0.0289 | -0.0041 |   |
|     |     |     | 0.0007 -0.0017 1 .        |        |        |        |         |   |
| 382 | CG  | CG  | . ASP ASP ASP A A 50 50 . | 0.0255 | 0.0356 | 0.0314 | -0.0015 |   |
|     |     |     | 0.0012 -0.0079 1 .        |        |        |        |         |   |
| 383 | OD1 | OD1 | . ASP ASP ASP A A 50 50 . | 0.0345 | 0.0258 | 0.0264 | -0.0021 |   |
|     |     |     | 0.0032 -0.0007 1 .        |        |        |        |         |   |
| 384 | OD2 | OD2 | . ASP ASP ASP A A 50 50 . | 0.0782 | 0.0483 | 0.0305 | -0.0029 |   |
|     |     |     | 0.0109 -0.0087 1 .        |        |        |        |         |   |
| 385 | C   | C   | . ASP ASP ASP A A 50 50 . | 0.0766 | 0.0428 | 0.0818 | 0.0126  |   |
|     |     |     | 0.0100 -0.0055 1 .        |        |        |        |         |   |
| 386 | O   | O   | . ASP ASP ASP A A 50 50 . | 0.1081 | 0.0314 | 0.0715 | 0.0181  |   |
|     |     |     | 0.0281 0.0066 1 .         |        |        |        |         |   |
| 387 | N   | N   | . GLY GLY GLY A A 51 51 . | 0.0952 | 0.0913 | 0.1122 | -0.0025 | - |
|     |     |     | 0.0036 0.0000 1 .         |        |        |        |         |   |
| 388 | CA  | CA  | . GLY GLY GLY A A 51 51 . | 0.0990 | 0.0961 | 0.1058 | 0.0080  |   |
|     |     |     | 0.0127 -0.0062 1 .        |        |        |        |         |   |
| 389 | C   | C   | . GLY GLY GLY A A 51 51 . | 0.1121 | 0.1114 | 0.1199 | 0.0220  |   |
|     |     |     | 0.0142 0.0108 1 .         |        |        |        |         |   |
| 390 | O   | O   | . GLY GLY GLY A A 51 51 . | 0.1685 | 0.1567 | 0.1569 | 0.0266  |   |
|     |     |     | 0.0447 0.0147 1 .         |        |        |        |         |   |
| 391 | N   | N   | . ASP ASP ASP A A 52 52 . | 0.1236 | 0.0975 | 0.1008 | 0.0222  | - |
|     |     |     | 0.0026 0.0100 1 .         |        |        |        |         |   |
| 392 | CA  | CA  | . ASP ASP ASP A A 52 52 . | 0.1291 | 0.1263 | 0.1391 | 0.0148  |   |
|     |     |     | 0.0137 0.0034 1 .         |        |        |        |         |   |
| 393 | CB  | CB  | . ASP ASP ASP A A 52 52 . | 0.1387 | 0.1215 | 0.1320 | 0.0208  | - |
|     |     |     | 0.0042 -0.0029 1 .        |        |        |        |         |   |
| 394 | CG  | CG  | . ASP ASP ASP A A 52 52 . | 0.1596 | 0.1596 | 0.1442 | 0.0163  |   |
|     |     |     | 0.0183 0.0046 1 .         |        |        |        |         |   |
| 395 | OD1 | OD1 | . ASP ASP ASP A A 52 52 . | 0.2286 | 0.2472 | 0.0450 | 0.0026  |   |
|     |     |     | 0.0189 -0.0497 1 .        |        |        |        |         |   |































|     |     |     |   |     |     |     |   |   |     |     |   |        |         |        |         |   |
|-----|-----|-----|---|-----|-----|-----|---|---|-----|-----|---|--------|---------|--------|---------|---|
| 774 | CD  | CD  | . | LYS | LYS | LYS | A | A | 102 | 102 | . | 0.0354 | 0.0426  | 0.0254 | 0.0132  | - |
|     |     |     |   |     |     |     |   |   |     |     |   | 0.0011 | -0.0014 | 1      | .       |   |
| 775 | CE  | CE  | . | LYS | LYS | LYS | A | A | 102 | 102 | . | 0.0299 | 0.0585  | 0.0460 | 0.0102  |   |
|     |     |     |   |     |     |     |   |   |     |     |   | 0.0096 | 0.0239  | 1      | .       |   |
| 776 | NZ  | NZ  | . | LYS | LYS | LYS | A | A | 102 | 102 | . | 0.0284 | 0.0346  | 0.0476 | 0.0035  |   |
|     |     |     |   |     |     |     |   |   |     |     |   | 0.0047 | -0.0034 | 1      | .       |   |
| 777 | C   | C   | . | LYS | LYS | LYS | A | A | 102 | 102 | . | 0.0364 | 0.0254  | 0.0360 | -0.0001 |   |
|     |     |     |   |     |     |     |   |   |     |     |   | 0.0074 | -0.0008 | 1      | .       |   |
| 778 | O   | O   | . | LYS | LYS | LYS | A | A | 102 | 102 | . | 0.0297 | 0.0331  | 0.0324 | 0.0058  | - |
|     |     |     |   |     |     |     |   |   |     |     |   | 0.0056 | -0.0074 | 1      | .       |   |
| 779 | N   | N   | . | SER | SER | SER | A | A | 103 | 103 | . | 0.0444 | 0.0394  | 0.0263 | 0.0164  | - |
|     |     |     |   |     |     |     |   |   |     |     |   | 0.0043 | -0.0037 | 1      | .       |   |
| 780 | CA  | CA  | . | SER | SER | SER | A | A | 103 | 103 | . | 0.0377 | 0.0334  | 0.0580 | 0.0081  |   |
|     |     |     |   |     |     |     |   |   |     |     |   | 0.0087 | -0.0028 | 1      | .       |   |
| 781 | CB  | CB  | . | SER | SER | SER | A | A | 103 | 103 | . | 0.0634 | 0.0644  | 0.0513 | 0.0223  |   |
|     |     |     |   |     |     |     |   |   |     |     |   | 0.0062 | -0.0217 | 1      | .       |   |
| 782 | OG  | OG  | . | SER | SER | SER | A | A | 103 | 103 | . | 0.0695 | 0.1533  | 0.1612 | 0.0354  |   |
|     |     |     |   |     |     |     |   |   |     |     |   | 0.0670 | -0.0047 | 1      | .       |   |
| 783 | C   | C   | . | SER | SER | SER | A | A | 103 | 103 | . | 0.0587 | 0.0608  | 0.0428 | -0.0076 |   |
|     |     |     |   |     |     |     |   |   |     |     |   | 0.0057 | -0.0076 | 1      | .       |   |
| 784 | O   | O   | . | SER | SER | SER | A | A | 103 | 103 | . | 0.0557 | 0.0593  | 0.0758 | -0.0031 |   |
|     |     |     |   |     |     |     |   |   |     |     |   | 0.0128 | -0.0402 | 1      | .       |   |
| 785 | N   | N   | . | LYS | LYS | LYS | A | A | 104 | 104 | . | 0.0567 | 0.0264  | 0.0466 | -0.0057 |   |
|     |     |     |   |     |     |     |   |   |     |     |   | 0.0062 | 0.0000  | 1      | .       |   |
| 786 | CA  | CA  | . | LYS | LYS | LYS | A | A | 104 | 104 | . | 0.0776 | 0.0538  | 0.0588 | 0.0069  |   |
|     |     |     |   |     |     |     |   |   |     |     |   | 0.0069 | -0.0056 | 1      | .       |   |
| 787 | CB  | CB  | . | LYS | LYS | LYS | A | A | 104 | 104 | . | 0.0808 | 0.0335  | 0.0300 | 0.0200  | - |
|     |     |     |   |     |     |     |   |   |     |     |   | 0.0039 | 0.0005  | 1      | .       |   |
| 788 | CG  | CG  | . | LYS | LYS | LYS | A | A | 104 | 104 | . | 0.0433 | 0.0515  | 0.0943 | -0.0207 |   |
|     |     |     |   |     |     |     |   |   |     |     |   | 0.0018 | 0.0083  | 1      | .       |   |
| 789 | CD  | CD  | . | LYS | LYS | LYS | A | A | 104 | 104 | . | 0.0988 | 0.1121  | 0.1599 | -0.0400 | - |
|     |     |     |   |     |     |     |   |   |     |     |   | 0.0533 | 0.0201  | 1      | .       |   |
| 790 | CE  | CE  | . | LYS | LYS | LYS | A | A | 104 | 104 | . | 0.1589 | 0.1039  | 0.1619 | -0.0321 |   |
|     |     |     |   |     |     |     |   |   |     |     |   | 0.0063 | 0.0356  | 1      | .       |   |
| 791 | NZ  | NZ  | . | LYS | LYS | LYS | A | A | 104 | 104 | . | 0.1512 | 0.0874  | 0.0555 | -0.0200 |   |
|     |     |     |   |     |     |     |   |   |     |     |   | 0.0270 | -0.0422 | 1      | .       |   |
| 792 | C   | C   | . | LYS | LYS | LYS | A | A | 104 | 104 | . | 0.0393 | 0.0678  | 0.0315 | 0.0018  | - |
|     |     |     |   |     |     |     |   |   |     |     |   | 0.0043 | -0.0135 | 1      | .       |   |
| 793 | O   | O   | . | LYS | LYS | LYS | A | A | 104 | 104 | . | 0.0724 | 0.0747  | 0.0544 | 0.0140  |   |
|     |     |     |   |     |     |     |   |   |     |     |   | 0.0039 | 0.0088  | 1      | .       |   |
| 794 | N   | N   | . | PHE | PHE | PHE | A | A | 105 | 105 | . | 0.0258 | 0.0266  | 0.0361 | 0.0008  | - |
|     |     |     |   |     |     |     |   |   |     |     |   | 0.0023 | -0.0037 | 1      | .       |   |
| 795 | CA  | CA  | . | PHE | PHE | PHE | A | A | 105 | 105 | . | 0.0429 | 0.0277  | 0.0262 | -0.0064 | - |
|     |     |     |   |     |     |     |   |   |     |     |   | 0.0039 | 0.0014  | 1      | .       |   |
| 796 | CB  | CB  | . | PHE | PHE | PHE | A | A | 105 | 105 | . | 0.0595 | 0.0327  | 0.0529 | 0.0087  | - |
|     |     |     |   |     |     |     |   |   |     |     |   | 0.0037 | 0.0108  | 1      | .       |   |
| 797 | CG  | CG  | . | PHE | PHE | PHE | A | A | 105 | 105 | . | 0.0814 | 0.0326  | 0.0579 | -0.0009 | - |
|     |     |     |   |     |     |     |   |   |     |     |   | 0.0107 | -0.0148 | 1      | .       |   |
| 798 | CD1 | CD1 | . | PHE | PHE | PHE | A | A | 105 | 105 | . | 0.1065 | 0.0293  | 0.0843 | -0.0159 | - |
|     |     |     |   |     |     |     |   |   |     |     |   | 0.0221 | 0.0113  | 1      | .       |   |
| 799 | CE1 | CE1 | . | PHE | PHE | PHE | A | A | 105 | 105 | . | 0.0401 | 0.0873  | 0.0726 | -0.0303 | - |
|     |     |     |   |     |     |     |   |   |     |     |   | 0.0018 | 0.0037  | 1      | .       |   |
| 800 | CZ  | CZ  | . | PHE | PHE | PHE | A | A | 105 | 105 | . | 0.0328 | 0.0754  | 0.1033 | 0.0161  |   |
|     |     |     |   |     |     |     |   |   |     |     |   | 0.0085 | -0.0143 | 1      | .       |   |











|     |     |     |                             |        |        |        |         |   |
|-----|-----|-----|-----------------------------|--------|--------|--------|---------|---|
| 909 | N   | N   | . ALA ALA ALA A A 123 123 . | 0.0621 | 0.0423 | 0.0771 | -0.0064 | - |
|     |     |     | 0.0099 0.0106 1 .           |        |        |        |         |   |
| 910 | CA  | CA  | . ALA ALA ALA A A 123 123 . | 0.0959 | 0.0647 | 0.1061 | 0.0111  | - |
|     |     |     | 0.0004 -0.0023 1 .          |        |        |        |         |   |
| 911 | CB  | CB  | . ALA ALA ALA A A 123 123 . | 0.1143 | 0.0598 | 0.1017 | -0.0084 |   |
|     |     |     | 0.0223 -0.0056 1 .          |        |        |        |         |   |
| 912 | C   | C   | . ALA ALA ALA A A 123 123 . | 0.0867 | 0.1013 | 0.1068 | 0.0058  |   |
|     |     |     | 0.0027 0.0078 1 .           |        |        |        |         |   |
| 913 | O   | O   | . ALA ALA ALA A A 123 123 . | 0.0988 | 0.0936 | 0.1274 | 0.0011  |   |
|     |     |     | 0.0217 0.0278 1 .           |        |        |        |         |   |
| 914 | N   | N   | . GLU GLU GLU A A 124 124 . | 0.0967 | 0.0903 | 0.1456 | -0.0113 |   |
|     |     |     | 0.0249 0.0009 1 .           |        |        |        |         |   |
| 915 | CA  | CA  | . GLU GLU GLU A A 124 124 . | 0.1140 | 0.1116 | 0.1344 | -0.0095 |   |
|     |     |     | 0.0146 -0.0007 1 .          |        |        |        |         |   |
| 916 | CB  | CB  | . GLU GLU GLU A A 124 124 . | 0.1178 | 0.1153 | 0.1595 | -0.0080 |   |
|     |     |     | 0.0119 -0.0234 1 .          |        |        |        |         |   |
| 917 | CG  | CG  | . GLU GLU GLU A A 124 124 . | 0.1976 | 0.1695 | 0.1832 | -0.0464 |   |
|     |     |     | 0.0000 -0.0108 1 .          |        |        |        |         |   |
| 918 | CD  | CD  | . GLU GLU GLU A A 124 124 . | 0.2119 | 0.2625 | 0.2372 | -0.0133 | - |
|     |     |     | 0.0265 -0.0129 1 .          |        |        |        |         |   |
| 919 | OE1 | OE1 | . GLU GLU GLU A A 124 124 . | 0.1788 | 0.2504 | 0.2259 | -0.0656 | - |
|     |     |     | 0.0345 -0.0284 1 .          |        |        |        |         |   |
| 920 | OE2 | OE2 | . GLU GLU GLU A A 124 124 . | 0.2523 | 0.3800 | 0.3117 | 0.0092  |   |
|     |     |     | 0.0320 -0.0401 1 .          |        |        |        |         |   |
| 921 | C   | C   | . GLU GLU GLU A A 124 124 . | 0.1099 | 0.1190 | 0.1381 | -0.0005 |   |
|     |     |     | 0.0100 -0.0222 1 .          |        |        |        |         |   |
| 922 | O   | O   | . GLU GLU GLU A A 124 124 . | 0.1029 | 0.1399 | 0.1458 | -0.0170 |   |
|     |     |     | 0.0035 -0.0297 1 .          |        |        |        |         |   |
| 923 | N   | N   | . ARG ARG ARG A A 125 125 . | 0.1050 | 0.1213 | 0.1141 | 0.0171  | - |
|     |     |     | 0.0116 -0.0194 1 .          |        |        |        |         |   |
| 924 | CA  | CA  | . ARG ARG ARG A A 125 125 . | 0.1111 | 0.1375 | 0.1125 | 0.0058  |   |
|     |     |     | 0.0136 -0.0076 1 .          |        |        |        |         |   |
| 925 | CB  | CB  | . ARG ARG ARG A A 125 125 . | 0.0984 | 0.1215 | 0.1043 | 0.0099  |   |
|     |     |     | 0.0011 -0.0018 1 .          |        |        |        |         |   |
| 926 | CG  | CG  | . ARG ARG ARG A A 125 125 . | 0.1146 | 0.1567 | 0.1405 | -0.0009 |   |
|     |     |     | 0.0291 0.0131 1 .           |        |        |        |         |   |
| 927 | CD  | CD  | . ARG ARG ARG A A 125 125 . | 0.1251 | 0.0461 | 0.0873 | -0.0441 |   |
|     |     |     | 0.0259 -0.0027 1 .          |        |        |        |         |   |
| 928 | NE  | NE  | . ARG ARG ARG A A 125 125 . | 0.1840 | 0.1279 | 0.0968 | -0.0304 |   |
|     |     |     | 0.0078 0.0243 1 .           |        |        |        |         |   |
| 929 | CZ  | CZ  | . ARG ARG ARG A A 125 125 . | 0.1488 | 0.0803 | 0.1008 | -0.0284 | - |
|     |     |     | 0.0072 -0.0159 1 .          |        |        |        |         |   |
| 930 | NH1 | NH1 | . ARG ARG ARG A A 125 125 . | 0.2159 | 0.1435 | 0.1575 | -0.0230 | - |
|     |     |     | 0.0075 -0.0212 1 .          |        |        |        |         |   |
| 931 | NH2 | NH2 | . ARG ARG ARG A A 125 125 . | 0.1415 | 0.1392 | 0.0899 | 0.0361  | - |
|     |     |     | 0.0027 -0.0098 1 .          |        |        |        |         |   |
| 932 | C   | C   | . ARG ARG ARG A A 125 125 . | 0.1077 | 0.1259 | 0.1113 | -0.0009 |   |
|     |     |     | 0.0002 -0.0174 1 .          |        |        |        |         |   |
| 933 | O   | O   | . ARG ARG ARG A A 125 125 . | 0.1336 | 0.1498 | 0.1466 | -0.0099 |   |
|     |     |     | 0.0202 -0.0152 1 .          |        |        |        |         |   |
| 934 | N   | N   | . GLU GLU GLU A A 126 126 . | 0.1306 | 0.1169 | 0.1349 | 0.0074  |   |
|     |     |     | 0.0031 -0.0131 1 .          |        |        |        |         |   |
| 935 | CA  | CA  | . GLU GLU GLU A A 126 126 . | 0.1482 | 0.1403 | 0.1679 | 0.0053  |   |
|     |     |     | 0.0035 -0.0098 1 .          |        |        |        |         |   |















|        |         |     |                             |        |        |        |         |   |
|--------|---------|-----|-----------------------------|--------|--------|--------|---------|---|
| 1098   | N       | N   | . PRO PRO PRO A A 147 147 . | 0.0253 | 0.0253 | 0.0253 | 0.0000  |   |
| 0.0000 | 0.0000  | 1 . |                             |        |        |        |         |   |
| 1099   | CA      | CA  | . PRO PRO PRO A A 147 147 . | 0.0271 | 0.0253 | 0.0260 | 0.0000  |   |
| 0.0011 | 0.0000  | 1 . |                             |        |        |        |         |   |
| 1100   | CB      | CB  | . PRO PRO PRO A A 147 147 . | 0.0357 | 0.0269 | 0.0256 | 0.0041  | - |
| 0.0019 | -0.0007 | 1 . |                             |        |        |        |         |   |
| 1101   | CG      | CG  | . PRO PRO PRO A A 147 147 . | 0.0750 | 0.0255 | 0.0546 | -0.0030 |   |
| 0.0011 | 0.0005  | 1 . |                             |        |        |        |         |   |
| 1102   | CD      | CD  | . PRO PRO PRO A A 147 147 . | 0.0330 | 0.0318 | 0.0281 | 0.0070  | - |
| 0.0046 | -0.0043 | 1 . |                             |        |        |        |         |   |
| 1103   | C       | C   | . PRO PRO PRO A A 147 147 . | 0.0445 | 0.0279 | 0.0327 | -0.0006 |   |
| 0.0115 | 0.0008  | 1 . |                             |        |        |        |         |   |
| 1104   | O       | O   | . PRO PRO PRO A A 147 147 . | 0.0382 | 0.0266 | 0.0277 | -0.0041 | - |
| 0.0055 | 0.0017  | 1 . |                             |        |        |        |         |   |
| 1105   | N       | N   | . ALA ALA ALA A A 148 148 . | 0.0297 | 0.0263 | 0.0289 | 0.0021  |   |
| 0.0039 | 0.0019  | 1 . |                             |        |        |        |         |   |
| 1106   | CA      | CA  | . ALA ALA ALA A A 148 148 . | 0.0548 | 0.0368 | 0.0295 | -0.0104 | - |
| 0.0107 | 0.0023  | 1 . |                             |        |        |        |         |   |
| 1107   | CB      | CB  | . ALA ALA ALA A A 148 148 . | 0.0311 | 0.0271 | 0.0255 | -0.0032 | - |
| 0.0009 | 0.0005  | 1 . |                             |        |        |        |         |   |
| 1108   | C       | C   | . ALA ALA ALA A A 148 148 . | 0.0430 | 0.0298 | 0.0292 | -0.0056 |   |
| 0.0083 | -0.0028 | 1 . |                             |        |        |        |         |   |
| 1109   | O       | O   | . ALA ALA ALA A A 148 148 . | 0.0343 | 0.0256 | 0.0261 | 0.0016  | - |
| 0.0026 | -0.0005 | 1 . |                             |        |        |        |         |   |
| 1110   | N       | N   | . PHE PHE PHE A A 149 149 . | 0.0495 | 0.0287 | 0.0255 | 0.0090  | - |
| 0.0021 | -0.0008 | 1 . |                             |        |        |        |         |   |
| 1111   | CA      | CA  | . PHE PHE PHE A A 149 149 . | 0.0283 | 0.0254 | 0.0302 | 0.0006  | - |
| 0.0038 | -0.0008 | 1 . |                             |        |        |        |         |   |
| 1112   | CB      | CB  | . PHE PHE PHE A A 149 149 . | 0.0307 | 0.0255 | 0.0304 | -0.0010 | - |
| 0.0052 | 0.0009  | 1 . |                             |        |        |        |         |   |
| 1113   | CG      | CG  | . PHE PHE PHE A A 149 149 . | 0.0270 | 0.0278 | 0.0270 | 0.0011  |   |
| 0.0017 | 0.0013  | 1 . |                             |        |        |        |         |   |
| 1114   | CD1     | CD1 | . PHE PHE PHE A A 149 149 . | 0.0426 | 0.0253 | 0.0302 | 0.0007  | - |
| 0.0092 | -0.0004 | 1 . |                             |        |        |        |         |   |
| 1115   | CE1     | CE1 | . PHE PHE PHE A A 149 149 . | 0.0387 | 0.0270 | 0.0302 | -0.0048 |   |
| 0.0080 | -0.0029 | 1 . |                             |        |        |        |         |   |
| 1116   | CZ      | CZ  | . PHE PHE PHE A A 149 149 . | 0.0476 | 0.0339 | 0.0543 | 0.0138  | - |
| 0.0254 | -0.0158 | 1 . |                             |        |        |        |         |   |
| 1117   | CE2     | CE2 | . PHE PHE PHE A A 149 149 . | 0.0253 | 0.0253 | 0.0253 | 0.0000  |   |
| 0.0000 | 0.0000  | 1 . |                             |        |        |        |         |   |
| 1118   | CD2     | CD2 | . PHE PHE PHE A A 149 149 . | 0.0253 | 0.0253 | 0.0253 | 0.0000  |   |
| 0.0000 | 0.0000  | 1 . |                             |        |        |        |         |   |
| 1119   | C       | C   | . PHE PHE PHE A A 149 149 . | 0.0275 | 0.0257 | 0.0256 | -0.0009 |   |
| 0.0008 | -0.0003 | 1 . |                             |        |        |        |         |   |
| 1120   | O       | O   | . PHE PHE PHE A A 149 149 . | 0.0309 | 0.0260 | 0.0274 | -0.0019 |   |
| 0.0034 | -0.0012 | 1 . |                             |        |        |        |         |   |
| 1121   | N       | N   | . ASN ASN ASN A A 150 150 . | 0.0253 | 0.0253 | 0.0253 | 0.0000  |   |
| 0.0000 | 0.0000  | 1 . |                             |        |        |        |         |   |
| 1122   | CA      | CA  | . ASN ASN ASN A A 150 150 . | 0.0268 | 0.0254 | 0.0264 | -0.0004 |   |
| 0.0013 | -0.0003 | 1 . |                             |        |        |        |         |   |
| 1123   | CB      | CB  | . ASN ASN ASN A A 150 150 . | 0.0253 | 0.0253 | 0.0253 | 0.0000  |   |
| 0.0000 | 0.0000  | 1 . |                             |        |        |        |         |   |
| 1124   | CG      | CG  | . ASN ASN ASN A A 150 150 . | 0.0303 | 0.0316 | 0.0318 | 0.0055  | - |
| 0.0056 | -0.0063 | 1 . |                             |        |        |        |         |   |





|        |         |     |                             |        |        |        |           |
|--------|---------|-----|-----------------------------|--------|--------|--------|-----------|
| 1179   | C       | C   | . ALA ALA ALA A A 158 158 . | 0.0703 | 0.0714 | 0.0848 | -0.0039   |
| 0.0138 | -0.0184 | 1 . |                             |        |        |        |           |
| 1180   | O       | O   | . ALA ALA ALA A A 158 158 . | 0.0941 | 0.0935 | 0.1309 | -0.0115   |
| 0.0116 | -0.0296 | 1 . |                             |        |        |        |           |
| 1181   | N       | N   | . GLY GLY GLY A A 159 159 . | 0.0929 | 0.0842 | 0.0917 | -0.0271   |
| 0.0309 | -0.0089 | 1 . |                             |        |        |        |           |
| 1182   | CA      | CA  | . GLY GLY GLY A A 159 159 . | 0.0709 | 0.0917 | 0.1056 | -0.0081   |
| 0.0351 | -0.0077 | 1 . |                             |        |        |        |           |
| 1183   | C       | C   | . GLY GLY GLY A A 159 159 . | 0.0992 | 0.1056 | 0.1166 | -0.0166   |
| 0.0116 | 0.0014  | 1 . |                             |        |        |        |           |
| 1184   | O       | O   | . GLY GLY GLY A A 159 159 . | 0.1428 | 0.0765 | 0.1083 | -0.0114   |
| 0.0227 | -0.0133 | 1 . |                             |        |        |        |           |
| 1185   | N       | N   | . ASN ASN ASN A A 160 160 . | 0.0536 | 0.0944 | 0.1078 | -0.0165   |
| 0.0039 | 0.0041  | 1 . |                             |        |        |        |           |
| 1186   | CA      | CA  | . ASN ASN ASN A A 160 160 . | 0.0730 | 0.0675 | 0.0939 | -0.0053   |
| 0.0121 | -0.0272 | 1 . |                             |        |        |        |           |
| 1187   | CB      | CB  | . ASN ASN ASN A A 160 160 . | 0.0528 | 0.0912 | 0.0944 | -0.0176   |
| 0.0230 | -0.0141 | 1 . |                             |        |        |        |           |
| 1188   | CG      | CG  | . ASN ASN ASN A A 160 160 . | 0.0416 | 0.0458 | 0.0505 | -0.0014   |
| 0.0021 | -0.0033 | 1 . |                             |        |        |        |           |
| 1189   | OD1     | OD1 | . ASN ASN ASN A A 160 160 . | 0.0420 | 0.0474 | 0.0797 | 0.0029    |
| 0.0132 | -0.0284 | 1 . |                             |        |        |        |           |
| 1190   | ND2     | ND2 | . ASN ASN ASN A A 160 160 . | 0.0456 | 0.0497 | 0.0671 | -0.0155   |
| 0.0079 | -0.0280 | 1 . |                             |        |        |        |           |
| 1191   | C       | C   | . ASN ASN ASN A A 160 160 . | 0.0837 | 0.0916 | 0.0967 | -0.0047   |
| 0.0140 | -0.0079 | 1 . |                             |        |        |        |           |
| 1192   | O       | O   | . ASN ASN ASN A A 160 160 . | 0.0851 | 0.0585 | 0.0702 | 0.0028    |
| 0.0181 | -0.0243 | 1 . |                             |        |        |        |           |
| 1193   | N       | N   | . LYS LYS LYS A A 161 161 . | 0.1080 | 0.0963 | 0.1102 | 0.0004    |
| 0.0118 | -0.0254 | 1 . |                             |        |        |        |           |
| 1194   | CA      | CA  | . LYS LYS LYS A A 161 161 . | 0.0889 | 0.1074 | 0.1070 | -0.0078   |
| 0.0108 | -0.0081 | 1 . |                             |        |        |        |           |
| 1195   | CB      | CB  | . LYS LYS LYS A A 161 161 . | 0.1070 | 0.1378 | 0.1396 | -0.0265   |
| 0.0425 | -0.0055 | 1 . |                             |        |        |        |           |
| 1196   | CG      | CG  | . LYS LYS LYS A A 161 161 . | 0.0925 | 0.1664 | 0.1106 | -0.0223   |
| 0.0094 | -0.0272 | 1 . |                             |        |        |        |           |
| 1197   | CD      | CD  | . LYS LYS LYS A A 161 161 . | 0.1248 | 0.2447 | 0.2302 | -0.0575   |
| 0.0165 | -0.0133 | 1 . |                             |        |        |        |           |
| 1198   | CE      | CE  | . LYS LYS LYS A A 161 161 . | 0.1706 | 0.2668 | 0.1964 | -0.0866 - |
| 0.0245 | -0.0354 | 1 . |                             |        |        |        |           |
| 1199   | NZ      | NZ  | . LYS LYS LYS A A 161 161 . | 0.1939 | 0.3240 | 0.3435 | -0.1126 - |
| 0.0373 | -0.0242 | 1 . |                             |        |        |        |           |
| 1200   | C       | C   | . LYS LYS LYS A A 161 161 . | 0.0882 | 0.0818 | 0.1065 | 0.0076    |
| 0.0149 | -0.0058 | 1 . |                             |        |        |        |           |
| 1201   | O       | O   | . LYS LYS LYS A A 161 161 . | 0.1089 | 0.1076 | 0.1082 | -0.0004   |
| 0.0040 | 0.0068  | 1 . |                             |        |        |        |           |
| 1202   | N       | N   | . LEU LEU LEU A A 162 162 . | 0.0749 | 0.0770 | 0.1004 | -0.0013   |
| 0.0214 | -0.0027 | 1 . |                             |        |        |        |           |
| 1203   | CA      | CA  | . LEU LEU LEU A A 162 162 . | 0.0473 | 0.0582 | 0.0714 | 0.0137 -  |
| 0.0055 | 0.0087  | 1 . |                             |        |        |        |           |
| 1204   | CB      | CB  | . LEU LEU LEU A A 162 162 . | 0.0400 | 0.0794 | 0.0722 | 0.0223    |
| 0.0019 | 0.0093  | 1 . |                             |        |        |        |           |
| 1205   | CG      | CG  | . LEU LEU LEU A A 162 162 . | 0.0254 | 0.0411 | 0.0413 | 0.0014 -  |
| 0.0014 | -0.0158 | 1 . |                             |        |        |        |           |

|      |        |         |                             |        |        |        |         |   |
|------|--------|---------|-----------------------------|--------|--------|--------|---------|---|
| 1206 | CD1    | CD1     | . LEU LEU LEU A A 162 162 . | 0.0267 | 0.0835 | 0.0390 | 0.0089  | - |
|      | 0.0043 | -0.0282 | 1 .                         |        |        |        |         |   |
| 1207 | CD2    | CD2     | . LEU LEU LEU A A 162 162 . | 0.0600 | 0.0411 | 0.0768 | 0.0231  | - |
|      | 0.0178 | -0.0075 | 1 .                         |        |        |        |         |   |
| 1208 | C      | C       | . LEU LEU LEU A A 162 162 . | 0.0531 | 0.0483 | 0.0690 | -0.0069 | - |
|      | 0.0095 | -0.0146 | 1 .                         |        |        |        |         |   |
| 1209 | O      | O       | . LEU LEU LEU A A 162 162 . | 0.0502 | 0.0585 | 0.0785 | -0.0050 | - |
|      | 0.0178 | -0.0190 | 1 .                         |        |        |        |         |   |
| 1210 | N      | N       | . ALA ALA ALA A A 163 163 . | 0.0338 | 0.0378 | 0.0637 | 0.0096  | - |
|      | 0.0039 | -0.0121 | 1 .                         |        |        |        |         |   |
| 1211 | CA     | CA      | . ALA ALA ALA A A 163 163 . | 0.0345 | 0.0470 | 0.0468 | 0.0073  | - |
|      | 0.0131 | -0.0037 | 1 .                         |        |        |        |         |   |
| 1212 | CB     | CB      | . ALA ALA ALA A A 163 163 . | 0.0390 | 0.0405 | 0.0592 | 0.0009  | - |
|      | 0.0214 | -0.0039 | 1 .                         |        |        |        |         |   |
| 1213 | C      | C       | . ALA ALA ALA A A 163 163 . | 0.0255 | 0.0393 | 0.0368 | 0.0019  | - |
|      | 0.0017 | -0.0127 | 1 .                         |        |        |        |         |   |
| 1214 | O      | O       | . ALA ALA ALA A A 163 163 . | 0.0518 | 0.0696 | 0.0734 | 0.0052  |   |
|      | 0.0151 | -0.0035 | 1 .                         |        |        |        |         |   |
| 1215 | N      | N       | . MET MET MET A A 164 164 . | 0.0342 | 0.0443 | 0.0445 | -0.0090 |   |
|      | 0.0014 | -0.0150 | 1 .                         |        |        |        |         |   |
| 1216 | CA     | CA      | . MET MET MET A A 164 164 . | 0.0323 | 0.0514 | 0.0441 | 0.0058  | - |
|      | 0.0088 | -0.0201 | 1 .                         |        |        |        |         |   |
| 1217 | CB     | CB      | . MET MET MET A A 164 164 . | 0.0310 | 0.0441 | 0.0405 | -0.0045 | - |
|      | 0.0046 | -0.0094 | 1 .                         |        |        |        |         |   |
| 1218 | CG     | CG      | . MET MET MET A A 164 164 . | 0.0752 | 0.0412 | 0.0373 | 0.0212  | - |
|      | 0.0174 | -0.0010 | 1 .                         |        |        |        |         |   |
| 1219 | SD     | SD      | . MET MET MET A A 164 164 . | 0.0895 | 0.0767 | 0.0978 | -0.0029 | - |
|      | 0.0172 | -0.0294 | 1 .                         |        |        |        |         |   |
| 1220 | CE     | CE      | . MET MET MET A A 164 164 . | 0.0850 | 0.0399 | 0.1021 | -0.0009 | - |
|      | 0.0394 | -0.0265 | 1 .                         |        |        |        |         |   |
| 1221 | C      | C       | . MET MET MET A A 164 164 . | 0.0330 | 0.0451 | 0.0526 | -0.0076 | - |
|      | 0.0051 | 0.0139  | 1 .                         |        |        |        |         |   |
| 1222 | O      | O       | . MET MET MET A A 164 164 . | 0.0432 | 0.0516 | 0.0623 | -0.0150 | - |
|      | 0.0044 | 0.0097  | 1 .                         |        |        |        |         |   |
| 1223 | N      | N       | . GLN GLN GLN A A 165 165 . | 0.0269 | 0.0338 | 0.0638 | -0.0037 |   |
|      | 0.0050 | -0.0103 | 1 .                         |        |        |        |         |   |
| 1224 | CA     | CA      | . GLN GLN GLN A A 165 165 . | 0.0334 | 0.0311 | 0.0382 | 0.0050  | - |
|      | 0.0043 | -0.0080 | 1 .                         |        |        |        |         |   |
| 1225 | CB     | CB      | . GLN GLN GLN A A 165 165 . | 0.0257 | 0.0273 | 0.0324 | 0.0008  | - |
|      | 0.0016 | -0.0037 | 1 .                         |        |        |        |         |   |
| 1226 | CG     | CG      | . GLN GLN GLN A A 165 165 . | 0.0374 | 0.0452 | 0.0288 | -0.0155 |   |
|      | 0.0065 | -0.0083 | 1 .                         |        |        |        |         |   |
| 1227 | CD     | CD      | . GLN GLN GLN A A 165 165 . | 0.0260 | 0.0365 | 0.0450 | 0.0014  |   |
|      | 0.0001 | -0.0124 | 1 .                         |        |        |        |         |   |
| 1228 | OE1    | OE1     | . GLN GLN GLN A A 165 165 . | 0.0391 | 0.0413 | 0.0703 | -0.0116 | - |
|      | 0.0028 | -0.0141 | 1 .                         |        |        |        |         |   |
| 1229 | NE2    | NE2     | . GLN GLN GLN A A 165 165 . | 0.0253 | 0.0353 | 0.0371 | 0.0000  |   |
|      | 0.0000 | -0.0109 | 1 .                         |        |        |        |         |   |
| 1230 | C      | C       | . GLN GLN GLN A A 165 165 . | 0.0254 | 0.0253 | 0.0258 | 0.0000  | - |
|      | 0.0002 | 0.0000  | 1 .                         |        |        |        |         |   |
| 1231 | O      | O       | . GLN GLN GLN A A 165 165 . | 0.0542 | 0.0457 | 0.0372 | -0.0024 |   |
|      | 0.0185 | -0.0023 | 1 .                         |        |        |        |         |   |
| 1232 | N      | N       | . GLU GLU GLU A A 166 166 . | 0.0522 | 0.0281 | 0.0418 | 0.0047  | - |
|      | 0.0068 | -0.0066 | 1 .                         |        |        |        |         |   |





|        |         |     |                             |        |        |        |         |   |
|--------|---------|-----|-----------------------------|--------|--------|--------|---------|---|
| 1260   | N       | N   | . ILE ILE ILE A A 169 169 . | 0.0332 | 0.0286 | 0.0310 | 0.0012  |   |
| 0.0003 | 0.0042  | 1 . |                             |        |        |        |         |   |
| 1261   | CA      | CA  | . ILE ILE ILE A A 169 169 . | 0.0436 | 0.0285 | 0.0256 | 0.0066  |   |
| 0.0018 | 0.0003  | 1 . |                             |        |        |        |         |   |
| 1262   | CB      | CB  | . ILE ILE ILE A A 169 169 . | 0.0273 | 0.0303 | 0.0311 | -0.0031 | - |
| 0.0034 | 0.0054  | 1 . |                             |        |        |        |         |   |
| 1263   | CG1     | CG1 | . ILE ILE ILE A A 169 169 . | 0.0257 | 0.0305 | 0.0281 | -0.0015 | - |
| 0.0011 | 0.0038  | 1 . |                             |        |        |        |         |   |
| 1264   | CD1     | CD1 | . ILE ILE ILE A A 169 169 . | 0.0312 | 0.0261 | 0.0382 | 0.0022  | - |
| 0.0087 | -0.0033 | 1 . |                             |        |        |        |         |   |
| 1265   | CG2     | CG2 | . ILE ILE ILE A A 169 169 . | 0.0642 | 0.0536 | 0.0420 | -0.0298 |   |
| 0.0006 | 0.0090  | 1 . |                             |        |        |        |         |   |
| 1266   | C       | C   | . ILE ILE ILE A A 169 169 . | 0.0289 | 0.0270 | 0.0391 | 0.0025  | - |
| 0.0070 | -0.0049 | 1 . |                             |        |        |        |         |   |
| 1267   | O       | O   | . ILE ILE ILE A A 169 169 . | 0.0318 | 0.0306 | 0.0384 | 0.0057  | - |
| 0.0083 | -0.0065 | 1 . |                             |        |        |        |         |   |
| 1268   | N       | N   | . LEU LEU LEU A A 170 170 . | 0.0258 | 0.0271 | 0.0274 | 0.0009  | - |
| 0.0010 | -0.0019 | 1 . |                             |        |        |        |         |   |
| 1269   | CA      | CA  | . LEU LEU LEU A A 170 170 . | 0.0519 | 0.0416 | 0.0268 | -0.0001 | - |
| 0.0020 | -0.0048 | 1 . |                             |        |        |        |         |   |
| 1270   | CB      | CB  | . LEU LEU LEU A A 170 170 . | 0.0424 | 0.0253 | 0.0332 | -0.0001 | - |
| 0.0116 | 0.0001  | 1 . |                             |        |        |        |         |   |
| 1271   | CG      | CG  | . LEU LEU LEU A A 170 170 . | 0.0418 | 0.0300 | 0.0662 | 0.0042  |   |
| 0.0253 | 0.0091  | 1 . |                             |        |        |        |         |   |
| 1272   | CD1     | CD1 | . LEU LEU LEU A A 170 170 . | 0.0422 | 0.0434 | 0.0668 | 0.0175  |   |
| 0.0265 | 0.0274  | 1 . |                             |        |        |        |         |   |
| 1273   | CD2     | CD2 | . LEU LEU LEU A A 170 170 . | 0.1222 | 0.0795 | 0.0585 | 0.0160  |   |
| 0.0038 | 0.0407  | 1 . |                             |        |        |        |         |   |
| 1274   | C       | C   | . LEU LEU LEU A A 170 170 . | 0.0311 | 0.0261 | 0.0258 | 0.0021  | - |
| 0.0017 | -0.0006 | 1 . |                             |        |        |        |         |   |
| 1275   | O       | O   | . LEU LEU LEU A A 170 170 . | 0.0404 | 0.0253 | 0.0307 | -0.0005 | - |
| 0.0090 | 0.0003  | 1 . |                             |        |        |        |         |   |
| 1276   | N       | N   | . PRO PRO PRO A A 171 171 . | 0.0254 | 0.0419 | 0.0300 | -0.0014 |   |
| 0.0007 | -0.0088 | 1 . |                             |        |        |        |         |   |
| 1277   | CA      | CA  | . PRO PRO PRO A A 171 171 . | 0.0314 | 0.0390 | 0.0310 | 0.0013  | - |
| 0.0051 | -0.0054 | 1 . |                             |        |        |        |         |   |
| 1278   | CB      | CB  | . PRO PRO PRO A A 171 171 . | 0.0253 | 0.0253 | 0.0253 | 0.0000  |   |
| 0.0000 | 0.0000  | 1 . |                             |        |        |        |         |   |
| 1279   | CG      | CG  | . PRO PRO PRO A A 171 171 . | 0.0732 | 0.0430 | 0.0457 | 0.0180  |   |
| 0.0027 | -0.0138 | 1 . |                             |        |        |        |         |   |
| 1280   | CD      | CD  | . PRO PRO PRO A A 171 171 . | 0.0260 | 0.0255 | 0.0265 | 0.0004  | - |
| 0.0009 | -0.0005 | 1 . |                             |        |        |        |         |   |
| 1281   | C       | C   | . PRO PRO PRO A A 171 171 . | 0.0253 | 0.0253 | 0.0253 | 0.0000  |   |
| 0.0000 | 0.0000  | 1 . |                             |        |        |        |         |   |
| 1282   | O       | O   | . PRO PRO PRO A A 171 171 . | 0.0299 | 0.0356 | 0.0373 | -0.0068 |   |
| 0.0074 | -0.0111 | 1 . |                             |        |        |        |         |   |
| 1283   | N       | N   | . VAL VAL VAL A A 172 172 . | 0.0283 | 0.0262 | 0.0327 | -0.0013 |   |
| 0.0041 | -0.0011 | 1 . |                             |        |        |        |         |   |
| 1284   | CA      | CA  | . VAL VAL VAL A A 172 172 . | 0.0371 | 0.0282 | 0.0287 | -0.0058 | - |
| 0.0063 | 0.0031  | 1 . |                             |        |        |        |         |   |
| 1285   | CB      | CB  | . VAL VAL VAL A A 172 172 . | 0.0729 | 0.0368 | 0.0503 | 0.0197  | - |
| 0.0057 | 0.0019  | 1 . |                             |        |        |        |         |   |
| 1286   | CG1     | CG1 | . VAL VAL VAL A A 172 172 . | 0.0304 | 0.0348 | 0.0256 | 0.0069  | - |
| 0.0013 | -0.0018 | 1 . |                             |        |        |        |         |   |



|        |         |     |                             |        |        |        |         |   |
|--------|---------|-----|-----------------------------|--------|--------|--------|---------|---|
| 1314   | N       | N   | . PHE PHE PHE A A 177 177 . | 0.0253 | 0.0253 | 0.0253 | 0.0000  |   |
| 0.0000 | 0.0000  | 1 . |                             |        |        |        |         |   |
| 1315   | CA      | CA  | . PHE PHE PHE A A 177 177 . | 0.0364 | 0.0362 | 0.0304 | 0.0043  | - |
| 0.0020 | -0.0073 | 1 . |                             |        |        |        |         |   |
| 1316   | CB      | CB  | . PHE PHE PHE A A 177 177 . | 0.0645 | 0.0332 | 0.0318 | 0.0046  |   |
| 0.0069 | 0.0021  | 1 . |                             |        |        |        |         |   |
| 1317   | CG      | CG  | . PHE PHE PHE A A 177 177 . | 0.0263 | 0.0424 | 0.0288 | 0.0041  | - |
| 0.0018 | -0.0078 | 1 . |                             |        |        |        |         |   |
| 1318   | CD1     | CD1 | . PHE PHE PHE A A 177 177 . | 0.0706 | 0.0447 | 0.0899 | 0.0079  |   |
| 0.0168 | 0.0353  | 1 . |                             |        |        |        |         |   |
| 1319   | CE1     | CE1 | . PHE PHE PHE A A 177 177 . | 0.0472 | 0.0284 | 0.0262 | -0.0081 | - |
| 0.0028 | 0.0012  | 1 . |                             |        |        |        |         |   |
| 1320   | CZ      | CZ  | . PHE PHE PHE A A 177 177 . | 0.0472 | 0.0274 | 0.0453 | -0.0018 |   |
| 0.0009 | -0.0063 | 1 . |                             |        |        |        |         |   |
| 1321   | CE2     | CE2 | . PHE PHE PHE A A 177 177 . | 0.0324 | 0.0270 | 0.0292 | -0.0035 | - |
| 0.0052 | 0.0026  | 1 . |                             |        |        |        |         |   |
| 1322   | CD2     | CD2 | . PHE PHE PHE A A 177 177 . | 0.0259 | 0.0267 | 0.0271 | -0.0009 | - |
| 0.0010 | 0.0016  | 1 . |                             |        |        |        |         |   |
| 1323   | C       | C   | . PHE PHE PHE A A 177 177 . | 0.0253 | 0.0278 | 0.0273 | 0.0000  |   |
| 0.0000 | -0.0022 | 1 . |                             |        |        |        |         |   |
| 1324   | O       | O   | . PHE PHE PHE A A 177 177 . | 0.0467 | 0.0350 | 0.0337 | 0.0070  |   |
| 0.0092 | 0.0087  | 1 . |                             |        |        |        |         |   |
| 1325   | N       | N   | . ARG ARG ARG A A 178 178 . | 0.0323 | 0.0276 | 0.0253 | -0.0040 |   |
| 0.0003 | -0.0002 | 1 . |                             |        |        |        |         |   |
| 1326   | CA      | CA  | . ARG ARG ARG A A 178 178 . | 0.0286 | 0.0342 | 0.0355 | 0.0051  |   |
| 0.0045 | 0.0055  | 1 . |                             |        |        |        |         |   |
| 1327   | CB      | CB  | . ARG ARG ARG A A 178 178 . | 0.0261 | 0.0268 | 0.0283 | 0.0011  |   |
| 0.0015 | 0.0021  | 1 . |                             |        |        |        |         |   |
| 1328   | CG      | CG  | . ARG ARG ARG A A 178 178 . | 0.1445 | 0.0765 | 0.1231 | 0.0130  | - |
| 0.0089 | 0.0264  | 1 . |                             |        |        |        |         |   |
| 1329   | CD      | CD  | . ARG ARG ARG A A 178 178 . | 0.1706 | 0.1953 | 0.2579 | -0.0211 | - |
| 0.0219 | 0.0055  | 1 . |                             |        |        |        |         |   |
| 1330   | NE      | NE  | . ARG ARG ARG A A 178 178 . | 0.3190 | 0.2787 | 0.3114 | -0.0081 | - |
| 0.0163 | 0.0205  | 1 . |                             |        |        |        |         |   |
| 1331   | CZ      | CZ  | . ARG ARG ARG A A 178 178 . | 0.3017 | 0.2673 | 0.3118 | -0.0070 | - |
| 0.0050 | -0.0046 | 1 . |                             |        |        |        |         |   |
| 1332   | NH1     | NH1 | . ARG ARG ARG A A 178 178 . | 0.3048 | 0.2291 | 0.3320 | 0.0133  | - |
| 0.0342 | -0.0157 | 1 . |                             |        |        |        |         |   |
| 1333   | NH2     | NH2 | . ARG ARG ARG A A 178 178 . | 0.1835 | 0.3171 | 0.3241 | -0.0423 | - |
| 0.0131 | -0.0099 | 1 . |                             |        |        |        |         |   |
| 1334   | C       | C   | . ARG ARG ARG A A 178 178 . | 0.0389 | 0.0337 | 0.0349 | 0.0098  |   |
| 0.0056 | 0.0011  | 1 . |                             |        |        |        |         |   |
| 1335   | O       | O   | . ARG ARG ARG A A 178 178 . | 0.0325 | 0.0312 | 0.0332 | 0.0065  |   |
| 0.0075 | 0.0068  | 1 . |                             |        |        |        |         |   |
| 1336   | N       | N   | . ASP ASP ASP A A 179 179 . | 0.0342 | 0.0348 | 0.0412 | 0.0067  |   |
| 0.0011 | -0.0075 | 1 . |                             |        |        |        |         |   |
| 1337   | CA      | CA  | . ASP ASP ASP A A 179 179 . | 0.0280 | 0.0346 | 0.0320 | 0.0025  |   |
| 0.0015 | -0.0049 | 1 . |                             |        |        |        |         |   |
| 1338   | CB      | CB  | . ASP ASP ASP A A 179 179 . | 0.0567 | 0.0261 | 0.0584 | -0.0050 |   |
| 0.0322 | -0.0051 | 1 . |                             |        |        |        |         |   |
| 1339   | CG      | CG  | . ASP ASP ASP A A 179 179 . | 0.0961 | 0.0759 | 0.0558 | 0.0062  |   |
| 0.0095 | -0.0311 | 1 . |                             |        |        |        |         |   |
| 1340   | OD1     | OD1 | . ASP ASP ASP A A 179 179 . | 0.1115 | 0.1268 | 0.0648 | -0.0270 | - |
| 0.0196 | -0.0179 | 1 . |                             |        |        |        |         |   |



|        |         |     |                             |        |        |        |         |   |
|--------|---------|-----|-----------------------------|--------|--------|--------|---------|---|
| 1368   | N       | N   | . LEU LEU LEU A A 183 183 . | 0.0253 | 0.0253 | 0.0253 | 0.0000  |   |
| 0.0000 | 0.0000  | 1 . |                             |        |        |        |         |   |
| 1369   | CA      | CA  | . LEU LEU LEU A A 183 183 . | 0.0268 | 0.0262 | 0.0319 | 0.0011  | - |
| 0.0031 | -0.0025 | 1 . |                             |        |        |        |         |   |
| 1370   | CB      | CB  | . LEU LEU LEU A A 183 183 . | 0.0388 | 0.0297 | 0.0392 | 0.0070  | - |
| 0.0105 | -0.0075 | 1 . |                             |        |        |        |         |   |
| 1371   | CG      | CG  | . LEU LEU LEU A A 183 183 . | 0.0454 | 0.0290 | 0.0258 | 0.0086  |   |
| 0.0031 | 0.0013  | 1 . |                             |        |        |        |         |   |
| 1372   | CD1     | CD1 | . LEU LEU LEU A A 183 183 . | 0.0438 | 0.0577 | 0.0416 | -0.0244 |   |
| 0.0010 | -0.0026 | 1 . |                             |        |        |        |         |   |
| 1373   | CD2     | CD2 | . LEU LEU LEU A A 183 183 . | 0.1108 | 0.0381 | 0.0467 | -0.0285 | - |
| 0.0314 | 0.0048  | 1 . |                             |        |        |        |         |   |
| 1374   | C       | C   | . LEU LEU LEU A A 183 183 . | 0.0487 | 0.0319 | 0.0274 | -0.0124 |   |
| 0.0069 | -0.0037 | 1 . |                             |        |        |        |         |   |
| 1375   | O       | O   | . LEU LEU LEU A A 183 183 . | 0.0334 | 0.0410 | 0.0569 | -0.0070 |   |
| 0.0157 | -0.0170 | 1 . |                             |        |        |        |         |   |
| 1376   | N       | N   | . GLY GLY GLY A A 184 184 . | 0.0351 | 0.0256 | 0.0383 | -0.0016 |   |
| 0.0112 | -0.0019 | 1 . |                             |        |        |        |         |   |
| 1377   | CA      | CA  | . GLY GLY GLY A A 184 184 . | 0.0537 | 0.0295 | 0.0305 | -0.0036 |   |
| 0.0116 | -0.0028 | 1 . |                             |        |        |        |         |   |
| 1378   | C       | C   | . GLY GLY GLY A A 184 184 . | 0.0386 | 0.0308 | 0.0345 | 0.0079  |   |
| 0.0019 | -0.0014 | 1 . |                             |        |        |        |         |   |
| 1379   | O       | O   | . GLY GLY GLY A A 184 184 . | 0.0364 | 0.0253 | 0.0371 | -0.0006 |   |
| 0.0114 | -0.0006 | 1 . |                             |        |        |        |         |   |
| 1380   | N       | N   | . ALA ALA ALA A A 185 185 . | 0.0343 | 0.0331 | 0.0399 | -0.0026 |   |
| 0.0022 | -0.0106 | 1 . |                             |        |        |        |         |   |
| 1381   | CA      | CA  | . ALA ALA ALA A A 185 185 . | 0.0349 | 0.0270 | 0.0486 | -0.0034 |   |
| 0.0109 | -0.0014 | 1 . |                             |        |        |        |         |   |
| 1382   | CB      | CB  | . ALA ALA ALA A A 185 185 . | 0.0524 | 0.0281 | 0.0561 | 0.0087  | - |
| 0.0030 | 0.0001  | 1 . |                             |        |        |        |         |   |
| 1383   | C       | C   | . ALA ALA ALA A A 185 185 . | 0.0396 | 0.0280 | 0.0534 | -0.0014 |   |
| 0.0127 | -0.0078 | 1 . |                             |        |        |        |         |   |
| 1384   | O       | O   | . ALA ALA ALA A A 185 185 . | 0.0754 | 0.0258 | 0.0394 | 0.0048  |   |
| 0.0265 | 0.0025  | 1 . |                             |        |        |        |         |   |
| 1385   | N       | N   | . GLU GLU GLU A A 186 186 . | 0.0323 | 0.0263 | 0.0254 | -0.0026 | - |
| 0.0009 | 0.0003  | 1 . |                             |        |        |        |         |   |
| 1386   | CA      | CA  | . GLU GLU GLU A A 186 186 . | 0.0253 | 0.0253 | 0.0255 | 0.0000  |   |
| 0.0000 | 0.0000  | 1 . |                             |        |        |        |         |   |
| 1387   | CB      | CB  | . GLU GLU GLU A A 186 186 . | 0.0433 | 0.0284 | 0.0306 | 0.0074  |   |
| 0.0098 | 0.0040  | 1 . |                             |        |        |        |         |   |
| 1388   | CG      | CG  | . GLU GLU GLU A A 186 186 . | 0.0263 | 0.0391 | 0.0488 | 0.0037  | - |
| 0.0048 | -0.0180 | 1 . |                             |        |        |        |         |   |
| 1389   | CD      | CD  | . GLU GLU GLU A A 186 186 . | 0.0438 | 0.0537 | 0.0556 | 0.0197  |   |
| 0.0106 | -0.0020 | 1 . |                             |        |        |        |         |   |
| 1390   | OE1     | OE1 | . GLU GLU GLU A A 186 186 . | 0.0864 | 0.0650 | 0.0690 | -0.0007 | - |
| 0.0099 | -0.0074 | 1 . |                             |        |        |        |         |   |
| 1391   | OE2     | OE2 | . GLU GLU GLU A A 186 186 . | 0.0489 | 0.0574 | 0.0651 | 0.0048  | - |
| 0.0247 | -0.0202 | 1 . |                             |        |        |        |         |   |
| 1392   | C       | C   | . GLU GLU GLU A A 186 186 . | 0.0304 | 0.0290 | 0.0266 | -0.0043 |   |
| 0.0025 | -0.0021 | 1 . |                             |        |        |        |         |   |
| 1393   | O       | O   | . GLU GLU GLU A A 186 186 . | 0.0512 | 0.0331 | 0.0466 | -0.0034 |   |
| 0.0143 | -0.0118 | 1 . |                             |        |        |        |         |   |
| 1394   | N       | N   | . VAL VAL VAL A A 187 187 . | 0.0308 | 0.0274 | 0.0316 | -0.0033 |   |
| 0.0058 | -0.0036 | 1 . |                             |        |        |        |         |   |





















































































































|      |        |         |                             |        |        |        |         |   |
|------|--------|---------|-----------------------------|--------|--------|--------|---------|---|
| 2772 | CG     | CG      | . TRP TRP TRP A A 364 364 . | 0.0987 | 0.0702 | 0.0609 | 0.0080  | - |
|      | 0.0173 | -0.0327 | 1 .                         |        |        |        |         |   |
| 2773 | CD1    | CD1     | . TRP TRP TRP A A 364 364 . | 0.0975 | 0.0747 | 0.0691 | 0.0208  | - |
|      | 0.0345 | -0.0442 | 1 .                         |        |        |        |         |   |
| 2774 | NE1    | NE1     | . TRP TRP TRP A A 364 364 . | 0.1067 | 0.1120 | 0.0532 | 0.0088  | - |
|      | 0.0075 | -0.0386 | 1 .                         |        |        |        |         |   |
| 2775 | CE2    | CE2     | . TRP TRP TRP A A 364 364 . | 0.1126 | 0.0934 | 0.0627 | 0.0484  | - |
|      | 0.0079 | -0.0320 | 1 .                         |        |        |        |         |   |
| 2776 | CD2    | CD2     | . TRP TRP TRP A A 364 364 . | 0.0674 | 0.0338 | 0.0394 | -0.0073 |   |
|      | 0.0182 | 0.0035  | 1 .                         |        |        |        |         |   |
| 2777 | CE3    | CE3     | . TRP TRP TRP A A 364 364 . | 0.0655 | 0.0767 | 0.0487 | 0.0068  | - |
|      | 0.0289 | -0.0164 | 1 .                         |        |        |        |         |   |
| 2778 | CZ3    | CZ3     | . TRP TRP TRP A A 364 364 . | 0.0679 | 0.0432 | 0.0878 | 0.0020  | - |
|      | 0.0449 | 0.0142  | 1 .                         |        |        |        |         |   |
| 2779 | CH2    | CH2     | . TRP TRP TRP A A 364 364 . | 0.0807 | 0.0554 | 0.0946 | -0.0044 | - |
|      | 0.0558 | -0.0152 | 1 .                         |        |        |        |         |   |
| 2780 | CZ2    | CZ2     | . TRP TRP TRP A A 364 364 . | 0.1093 | 0.0797 | 0.0395 | 0.0158  |   |
|      | 0.0259 | 0.0226  | 1 .                         |        |        |        |         |   |
| 2781 | C      | C       | . TRP TRP TRP A A 364 364 . | 0.0653 | 0.0573 | 0.0490 | -0.0004 |   |
|      | 0.0185 | -0.0222 | 1 .                         |        |        |        |         |   |
| 2782 | O      | O       | . TRP TRP TRP A A 364 364 . | 0.0743 | 0.0667 | 0.0478 | 0.0021  |   |
|      | 0.0042 | -0.0255 | 1 .                         |        |        |        |         |   |
| 2783 | N      | N       | . GLY GLY GLY A A 365 365 . | 0.0938 | 0.0508 | 0.0544 | 0.0385  | - |
|      | 0.0037 | 0.0037  | 1 .                         |        |        |        |         |   |
| 2784 | CA     | CA      | . GLY GLY GLY A A 365 365 . | 0.0450 | 0.0616 | 0.0371 | 0.0228  | - |
|      | 0.0071 | -0.0016 | 1 .                         |        |        |        |         |   |
| 2785 | C      | C       | . GLY GLY GLY A A 365 365 . | 0.0443 | 0.0410 | 0.0648 | -0.0008 | - |
|      | 0.0130 | -0.0037 | 1 .                         |        |        |        |         |   |
| 2786 | O      | O       | . GLY GLY GLY A A 365 365 . | 0.0386 | 0.0356 | 0.0484 | 0.0117  | - |
|      | 0.0175 | -0.0154 | 1 .                         |        |        |        |         |   |
| 2787 | N      | N       | . VAL VAL VAL A A 366 366 . | 0.0498 | 0.0521 | 0.0350 | -0.0136 |   |
|      | 0.0003 | -0.0138 | 1 .                         |        |        |        |         |   |
| 2788 | CA     | CA      | . VAL VAL VAL A A 366 366 . | 0.0322 | 0.0515 | 0.0261 | -0.0127 |   |
|      | 0.0020 | -0.0044 | 1 .                         |        |        |        |         |   |
| 2789 | CB     | CB      | . VAL VAL VAL A A 366 366 . | 0.0387 | 0.0495 | 0.0378 | -0.0053 | - |
|      | 0.0062 | -0.0120 | 1 .                         |        |        |        |         |   |
| 2790 | CG1    | CG1     | . VAL VAL VAL A A 366 366 . | 0.0341 | 0.0773 | 0.0503 | 0.0129  | - |
|      | 0.0143 | -0.0137 | 1 .                         |        |        |        |         |   |
| 2791 | CG2    | CG2     | . VAL VAL VAL A A 366 366 . | 0.0297 | 0.0300 | 0.0270 | -0.0045 |   |
|      | 0.0027 | -0.0028 | 1 .                         |        |        |        |         |   |
| 2792 | C      | C       | . VAL VAL VAL A A 366 366 . | 0.0380 | 0.0394 | 0.0381 | 0.0033  |   |
|      | 0.0030 | -0.0022 | 1 .                         |        |        |        |         |   |
| 2793 | O      | O       | . VAL VAL VAL A A 366 366 . | 0.0262 | 0.0264 | 0.0253 | 0.0009  | - |
|      | 0.0001 | -0.0001 | 1 .                         |        |        |        |         |   |
| 2794 | N      | N       | . MET MET MET A A 367 367 . | 0.0316 | 0.0299 | 0.0286 | 0.0054  |   |
|      | 0.0046 | 0.0039  | 1 .                         |        |        |        |         |   |
| 2795 | CA     | CA      | . MET MET MET A A 367 367 . | 0.0483 | 0.0306 | 0.0308 | -0.0099 | - |
|      | 0.0106 | 0.0038  | 1 .                         |        |        |        |         |   |
| 2796 | CB     | CB      | . MET MET MET A A 367 367 . | 0.0376 | 0.0304 | 0.0292 | 0.0079  |   |
|      | 0.0069 | 0.0045  | 1 .                         |        |        |        |         |   |
| 2797 | CG     | CG      | . MET MET MET A A 367 367 . | 0.0401 | 0.0426 | 0.0344 | 0.0160  | - |
|      | 0.0116 | -0.0125 | 1 .                         |        |        |        |         |   |
| 2798 | SD     | SD      | . MET MET MET A A 367 367 . | 0.0721 | 0.0501 | 0.0339 | -0.0012 | - |
|      | 0.0088 | -0.0084 | 1 .                         |        |        |        |         |   |



|      |        |         |                   |         |                                  |
|------|--------|---------|-------------------|---------|----------------------------------|
| 2826 | CA     | CA      | . ARG ARG ARG A A | 371 371 | . 0.0305 0.0256 0.0334 -0.0013 - |
|      | 0.0065 | 0.0016  | 1 .               |         |                                  |
| 2827 | CB     | CB      | . ARG ARG ARG A A | 371 371 | . 0.0256 0.0271 0.0265 -0.0007   |
|      | 0.0006 | -0.0014 | 1 .               |         |                                  |
| 2828 | CG     | CG      | . ARG ARG ARG A A | 371 371 | . 0.0253 0.0253 0.0253 0.0000    |
|      | 0.0000 | 0.0000  | 1 .               |         |                                  |
| 2829 | CD     | CD      | . ARG ARG ARG A A | 371 371 | . 0.0253 0.0253 0.0253 0.0000    |
|      | 0.0000 | 0.0000  | 1 .               |         |                                  |
| 2830 | NE     | NE      | . ARG ARG ARG A A | 371 371 | . 0.0289 0.0396 0.0303 0.0069 -  |
|      | 0.0041 | -0.0084 | 1 .               |         |                                  |
| 2831 | CZ     | CZ      | . ARG ARG ARG A A | 371 371 | . 0.0253 0.0253 0.0253 0.0000    |
|      | 0.0000 | 0.0000  | 1 .               |         |                                  |
| 2832 | NH1    | NH1     | . ARG ARG ARG A A | 371 371 | . 0.0253 0.0253 0.0253 0.0000    |
|      | 0.0000 | 0.0000  | 1 .               |         |                                  |
| 2833 | NH2    | NH2     | . ARG ARG ARG A A | 371 371 | . 0.0329 0.0253 0.0259 -0.0006 - |
|      | 0.0022 | 0.0001  | 1 .               |         |                                  |
| 2834 | C      | C       | . ARG ARG ARG A A | 371 371 | . 0.0290 0.0308 0.0271 -0.0045 - |
|      | 0.0026 | 0.0031  | 1 .               |         |                                  |
| 2835 | O      | O       | . ARG ARG ARG A A | 371 371 | . 0.0256 0.0253 0.0253 0.0000    |
|      | 0.0001 | 0.0000  | 1 .               |         |                                  |
| 2836 | N      | N       | . SER SER SER A A | 372 372 | . 0.0253 0.0374 0.0254 -0.0005   |
|      | 0.0000 | 0.0013  | 1 .               |         |                                  |
| 2837 | CA     | CA      | . SER SER SER A A | 372 372 | . 0.0869 0.0332 0.0536 0.0040 -  |
|      | 0.0060 | 0.0113  | 1 .               |         |                                  |
| 2838 | CB     | CB      | . SER SER SER A A | 372 372 | . 0.0632 0.0936 0.0373 -0.0376 - |
|      | 0.0015 | 0.0207  | 1 .               |         |                                  |
| 2839 | OG     | OG      | . SER SER SER A A | 372 372 | . 0.2631 0.2267 0.1281 -0.0630 - |
|      | 0.0385 | 0.0292  | 1 .               |         |                                  |
| 2840 | C      | C       | . SER SER SER A A | 372 372 | . 0.0536 0.0354 0.0255 -0.0024   |
|      | 0.0021 | -0.0010 | 1 .               |         |                                  |
| 2841 | O      | O       | . SER SER SER A A | 372 372 | . 0.0253 0.0253 0.0253 0.0000    |
|      | 0.0000 | 0.0000  | 1 .               |         |                                  |
| 2842 | N      | N       | . GLY GLY GLY A A | 373 373 | . 0.0433 0.0451 0.0276 -0.0157   |
|      | 0.0047 | -0.0015 | 1 .               |         |                                  |
| 2843 | CA     | CA      | . GLY GLY GLY A A | 373 373 | . 0.0259 0.0253 0.0256 0.0000 -  |
|      | 0.0004 | 0.0000  | 1 .               |         |                                  |
| 2844 | C      | C       | . GLY GLY GLY A A | 373 373 | . 0.0264 0.0288 0.0255 -0.0019   |
|      | 0.0005 | -0.0009 | 1 .               |         |                                  |
| 2845 | O      | O       | . GLY GLY GLY A A | 373 373 | . 0.0447 0.0320 0.0410 0.0114    |
|      | 0.0174 | 0.0102  | 1 .               |         |                                  |
| 2846 | N      | N       | . GLU GLU GLU A A | 374 374 | . 0.0332 0.0270 0.0256 -0.0037   |
|      | 0.0016 | -0.0007 | 1 .               |         |                                  |
| 2847 | CA     | CA      | . GLU GLU GLU A A | 374 374 | . 0.0451 0.0253 0.0253 -0.0008   |
|      | 0.0000 | 0.0000  | 1 .               |         |                                  |
| 2848 | CB     | CB      | . GLU GLU GLU A A | 374 374 | . 0.0461 0.0259 0.0262 -0.0034   |
|      | 0.0043 | -0.0007 | 1 .               |         |                                  |
| 2849 | CG     | CG      | . GLU GLU GLU A A | 374 374 | . 0.0253 0.0253 0.0253 0.0000    |
|      | 0.0000 | 0.0000  | 1 .               |         |                                  |
| 2850 | CD     | CD      | . GLU GLU GLU A A | 374 374 | . 0.0256 0.0296 0.0307 -0.0012   |
|      | 0.0013 | -0.0048 | 1 .               |         |                                  |
| 2851 | OE1    | OE1     | . GLU GLU GLU A A | 374 374 | . 0.0253 0.0253 0.0253 0.0000    |
|      | 0.0000 | 0.0000  | 1 .               |         |                                  |
| 2852 | OE2    | OE2     | . GLU GLU GLU A A | 374 374 | . 0.0253 0.0253 0.0253 0.0000    |
|      | 0.0000 | 0.0000  | 1 .               |         |                                  |





























|        |         |     |                             |        |        |        |         |   |
|--------|---------|-----|-----------------------------|--------|--------|--------|---------|---|
| 3177   | CG      | CG  | . LEU LEU LEU A A 416 416 . | 0.1217 | 0.1590 | 0.0470 | 0.0029  |   |
| 0.0287 | 0.0428  | 1 . |                             |        |        |        |         |   |
| 3178   | CD1     | CD1 | . LEU LEU LEU A A 416 416 . | 0.1184 | 0.2153 | 0.1575 | 0.0649  |   |
| 0.0182 | 0.0018  | 1 . |                             |        |        |        |         |   |
| 3179   | CD2     | CD2 | . LEU LEU LEU A A 416 416 . | 0.1875 | 0.1266 | 0.2152 | -0.0325 |   |
| 0.0217 | 0.0455  | 1 . |                             |        |        |        |         |   |
| 3180   | C       | C   | . LEU LEU LEU A A 416 416 . | 0.1914 | 0.1765 | 0.1541 | -0.0102 |   |
| 0.0378 | 0.0041  | 1 . |                             |        |        |        |         |   |
| 3181   | O       | O   | . LEU LEU LEU A A 416 416 . | 0.2044 | 0.2066 | 0.1374 | -0.0288 |   |
| 0.0464 | 0.0002  | 1 . |                             |        |        |        |         |   |
| 3182   | N       | N   | . GLY GLY GLY A A 417 417 . | 0.2252 | 0.2142 | 0.1818 | -0.0009 |   |
| 0.0399 | 0.0216  | 1 . |                             |        |        |        |         |   |
| 3183   | CA      | CA  | . GLY GLY GLY A A 417 417 . | 0.2872 | 0.2723 | 0.2681 | -0.0017 |   |
| 0.0337 | -0.0035 | 1 . |                             |        |        |        |         |   |
| 3184   | C       | C   | . GLY GLY GLY A A 417 417 . | 0.3087 | 0.3210 | 0.3097 | -0.0093 |   |
| 0.0157 | -0.0046 | 1 . |                             |        |        |        |         |   |
| 3185   | O       | O   | . GLY GLY GLY A A 417 417 . | 0.3182 | 0.3505 | 0.3274 | -0.0153 |   |
| 0.0358 | -0.0194 | 1 . |                             |        |        |        |         |   |
| 3186   | N       | N   | . ASP ASP ASP A A 418 418 . | 0.3498 | 0.3627 | 0.3440 | -0.0077 |   |
| 0.0160 | -0.0149 | 1 . |                             |        |        |        |         |   |
| 3187   | CA      | CA  | . ASP ASP ASP A A 418 418 . | 0.3704 | 0.3941 | 0.3771 | -0.0099 |   |
| 0.0011 | -0.0085 | 1 . |                             |        |        |        |         |   |
| 3188   | CB      | CB  | . ASP ASP ASP A A 418 418 . | 0.3879 | 0.4022 | 0.3776 | -0.0095 |   |
| 0.0046 | -0.0095 | 1 . |                             |        |        |        |         |   |
| 3189   | CG      | CG  | . ASP ASP ASP A A 418 418 . | 0.4300 | 0.4274 | 0.4327 | -0.0211 | - |
| 0.0065 | 0.0059  | 1 . |                             |        |        |        |         |   |
| 3190   | OD1     | OD1 | . ASP ASP ASP A A 418 418 . | 0.4497 | 0.4404 | 0.4473 | -0.0134 | - |
| 0.0269 | 0.0041  | 1 . |                             |        |        |        |         |   |
| 3191   | OD2     | OD2 | . ASP ASP ASP A A 418 418 . | 0.5007 | 0.4922 | 0.4387 | -0.0434 | - |
| 0.0053 | 0.0369  | 1 . |                             |        |        |        |         |   |
| 3192   | C       | C   | . ASP ASP ASP A A 418 418 . | 0.3698 | 0.3894 | 0.3785 | -0.0100 |   |
| 0.0042 | -0.0066 | 1 . |                             |        |        |        |         |   |
| 3193   | O       | O   | . ASP ASP ASP A A 418 418 . | 0.3892 | 0.4102 | 0.4017 | -0.0070 |   |
| 0.0065 | -0.0063 | 1 . |                             |        |        |        |         |   |
| 3194   | N       | N   | . GLU GLU GLU A A 419 419 . | 0.3647 | 0.3902 | 0.3755 | -0.0086 |   |
| 0.0068 | -0.0056 | 1 . |                             |        |        |        |         |   |
| 3195   | CA      | CA  | . GLU GLU GLU A A 419 419 . | 0.3637 | 0.3785 | 0.3667 | -0.0050 |   |
| 0.0071 | -0.0042 | 1 . |                             |        |        |        |         |   |
| 3196   | CB      | CB  | . GLU GLU GLU A A 419 419 . | 0.3652 | 0.3944 | 0.3742 | -0.0073 |   |
| 0.0113 | -0.0043 | 1 . |                             |        |        |        |         |   |
| 3197   | CG      | CG  | . GLU GLU GLU A A 419 419 . | 0.4342 | 0.4299 | 0.4266 | 0.0125  |   |
| 0.0273 | 0.0066  | 1 . |                             |        |        |        |         |   |
| 3198   | CD      | CD  | . GLU GLU GLU A A 419 419 . | 0.5191 | 0.4893 | 0.5013 | -0.0102 |   |
| 0.0333 | 0.0002  | 1 . |                             |        |        |        |         |   |
| 3199   | OE1     | OE1 | . GLU GLU GLU A A 419 419 . | 0.5432 | 0.5099 | 0.5287 | 0.0093  |   |
| 0.0621 | 0.0088  | 1 . |                             |        |        |        |         |   |
| 3200   | OE2     | OE2 | . GLU GLU GLU A A 419 419 . | 0.5323 | 0.4884 | 0.5125 | 0.0200  |   |
| 0.0421 | -0.0119 | 1 . |                             |        |        |        |         |   |
| 3201   | C       | C   | . GLU GLU GLU A A 419 419 . | 0.3426 | 0.3461 | 0.3417 | -0.0117 |   |
| 0.0039 | -0.0087 | 1 . |                             |        |        |        |         |   |
| 3202   | O       | O   | . GLU GLU GLU A A 419 419 . | 0.3374 | 0.3266 | 0.3205 | -0.0212 | - |
| 0.0084 | 0.0066  | 1 . |                             |        |        |        |         |   |
| 3203   | N       | N   | . ALA ALA ALA A A 420 420 . | 0.3175 | 0.3167 | 0.3097 | -0.0021 | - |
| 0.0036 | -0.0133 | 1 . |                             |        |        |        |         |   |









|        |         |      |                             |        |        |        |           |
|--------|---------|------|-----------------------------|--------|--------|--------|-----------|
| 3312   | CD2     | CD2  | . LEU LEU LEU A A 433 433 . | 0.2306 | 0.1939 | 0.1021 | -0.0202   |
| 0.0770 | -0.0375 | 1 .  |                             |        |        |        |           |
| 3313   | C       | C    | . LEU LEU LEU A A 433 433 . | 0.2253 | 0.2232 | 0.1649 | -0.0179 - |
| 0.0118 | 0.0059  | 1 .  |                             |        |        |        |           |
| 3314   | O       | O    | . LEU LEU LEU A A 433 433 . | 0.2510 | 0.2593 | 0.1943 | -0.0197 - |
| 0.0326 | -0.0140 | 1 .  |                             |        |        |        |           |
| 3315   | MG+2    | MG+2 | . MG2 MG2 MG2 A . 600 600 . | 0.0260 | 0.0266 | 0.0361 | 0.0009 -  |
| 0.0028 | -0.0037 | 1 .  |                             |        |        |        |           |
| 3316   | MG+2    | MG+2 | . MG2 MG2 MG2 A . 601 601 . | 0.0254 | 0.0303 | 0.0440 | 0.0007 -  |
| 0.0013 | -0.0096 | 1 .  |                             |        |        |        |           |
| 3317   | O4P     | O4P  | . 2PG 2PG 2PG A . 602 602 . | 0.0330 | 0.0325 | 0.0446 | -0.0074 - |
| 0.0121 | 0.0117  | 1 .  |                             |        |        |        |           |
| 3318   | P       | P    | . 2PG 2PG 2PG A . 602 602 . | 0.0253 | 0.0253 | 0.0253 | 0.0000    |
| 0.0000 | 0.0000  | 1 .  |                             |        |        |        |           |
| 3319   | O2P     | O2P  | . 2PG 2PG 2PG A . 602 602 . | 0.0283 | 0.0270 | 0.0463 | -0.0005   |
| 0.0028 | -0.0058 | 1 .  |                             |        |        |        |           |
| 3320   | O3P     | O3P  | . 2PG 2PG 2PG A . 602 602 . | 0.0258 | 0.0276 | 0.0260 | 0.0010    |
| 0.0005 | 0.0012  | 1 .  |                             |        |        |        |           |
| 3321   | O1P     | O1P  | . 2PG 2PG 2PG A . 602 602 . | 0.0353 | 0.0337 | 0.0336 | -0.0023   |
| 0.0038 | -0.0082 | 1 .  |                             |        |        |        |           |
| 3322   | C2      | C2   | . 2PG 2PG 2PG A . 602 602 . | 0.0700 | 0.0734 | 0.0746 | 0.0022    |
| 0.0320 | -0.0085 | 1 .  |                             |        |        |        |           |
| 3323   | C1      | C1   | . 2PG 2PG 2PG A . 602 602 . | 0.0527 | 0.1013 | 0.0902 | 0.0018    |
| 0.0274 | -0.0098 | 1 .  |                             |        |        |        |           |
| 3324   | O2      | O2   | . 2PG 2PG 2PG A . 602 602 . | 0.0499 | 0.0513 | 0.0733 | 0.0027    |
| 0.0238 | -0.0225 | 1 .  |                             |        |        |        |           |
| 3325   | O1      | O1   | . 2PG 2PG 2PG A . 602 602 . | 0.0330 | 0.0280 | 0.0737 | 0.0030 -  |
| 0.0079 | -0.0108 | 1 .  |                             |        |        |        |           |
| 3326   | C3      | C3   | . 2PG 2PG 2PG A . 602 602 . | 0.0535 | 0.1264 | 0.1576 | -0.0094 - |
| 0.0155 | -0.0085 | 1 .  |                             |        |        |        |           |
| 3327   | O3      | O3   | . 2PG 2PG 2PG A . 602 602 . | 0.0965 | 0.1145 | 0.0880 | 0.0224 -  |
| 0.0161 | 0.0238  | 1 .  |                             |        |        |        |           |
| 3328   | O       | O    | . HOH HOH HOH A . 603 603 . | 0.0259 | 0.0351 | 0.0312 | 0.0024 -  |
| 0.0019 | -0.0076 | 1 .  |                             |        |        |        |           |
| 3329   | O       | O    | . HOH HOH HOH A . 604 604 . | 0.0285 | 0.0362 | 0.0439 | 0.0059 -  |
| 0.0077 | -0.0142 | 1 .  |                             |        |        |        |           |
| 3330   | O       | O    | . HOH HOH HOH A . 605 605 . | 0.0281 | 0.0274 | 0.0483 | -0.0017 - |
| 0.0026 | -0.0029 | 1 .  |                             |        |        |        |           |
| 3331   | O3      | O3   | . TRS TRS TRS A . 606 606 . | 0.3116 | 0.2822 | 0.3373 | -0.0471   |
| 0.0208 | -0.0055 | 1 .  |                             |        |        |        |           |
| 3332   | C3      | C3   | . TRS TRS TRS A . 606 606 . | 0.2979 | 0.2807 | 0.3250 | -0.0137   |
| 0.0112 | -0.0137 | 1 .  |                             |        |        |        |           |
| 3333   | C       | C    | . TRS TRS TRS A . 606 606 . | 0.2823 | 0.2634 | 0.2975 | -0.0221   |
| 0.0088 | -0.0189 | 1 .  |                             |        |        |        |           |
| 3334   | N       | N    | . TRS TRS TRS A . 606 606 . | 0.2921 | 0.2533 | 0.2860 | -0.0145   |
| 0.0079 | -0.0154 | 1 .  |                             |        |        |        |           |
| 3335   | C2      | C2   | . TRS TRS TRS A . 606 606 . | 0.2977 | 0.2816 | 0.3009 | -0.0114   |
| 0.0083 | -0.0206 | 1 .  |                             |        |        |        |           |
| 3336   | O2      | O2   | . TRS TRS TRS A . 606 606 . | 0.2286 | 0.2754 | 0.3276 | -0.0673   |
| 0.0187 | -0.0217 | 1 .  |                             |        |        |        |           |
| 3337   | C1      | C1   | . TRS TRS TRS A . 606 606 . | 0.2792 | 0.2581 | 0.2843 | -0.0163   |
| 0.0009 | -0.0205 | 1 .  |                             |        |        |        |           |
| 3338   | O1      | O1   | . TRS TRS TRS A . 606 606 . | 0.2289 | 0.1798 | 0.2329 | -0.0175 - |
| 0.0189 | -0.0796 | 1 .  |                             |        |        |        |           |

|        |         |     |                     |   |                                  |
|--------|---------|-----|---------------------|---|----------------------------------|
| 3339   | N       | N   | . SER SER SER B B 1 | 1 | . 0.2658 0.2741 0.2524 0.0007    |
| 0.0014 | -0.0015 | 1 . |                     |   |                                  |
| 3340   | CA      | CA  | . SER SER SER B B 1 | 1 | . 0.2535 0.2637 0.2546 -0.0041   |
| 0.0058 | 0.0048  | 1 . |                     |   |                                  |
| 3341   | CB      | CB  | . SER SER SER B B 1 | 1 | . 0.2629 0.2696 0.2597 -0.0136   |
| 0.0159 | 0.0055  | 1 . |                     |   |                                  |
| 3342   | OG      | OG  | . SER SER SER B B 1 | 1 | . 0.3120 0.3270 0.2485 -0.0461   |
| 0.0207 | 0.0248  | 1 . |                     |   |                                  |
| 3343   | C       | C   | . SER SER SER B B 1 | 1 | . 0.2426 0.2419 0.2396 0.0071    |
| 0.0055 | 0.0070  | 1 . |                     |   |                                  |
| 3344   | O       | O   | . SER SER SER B B 1 | 1 | . 0.2568 0.2559 0.2320 0.0132    |
| 0.0040 | 0.0096  | 1 . |                     |   |                                  |
| 3345   | N       | N   | . ILE ILE ILE B B 2 | 2 | . 0.2046 0.1969 0.2025 0.0202    |
| 0.0080 | 0.0009  | 1 . |                     |   |                                  |
| 3346   | CA      | CA  | . ILE ILE ILE B B 2 | 2 | . 0.1772 0.1613 0.1742 0.0220    |
| 0.0116 | 0.0008  | 1 . |                     |   |                                  |
| 3347   | CB      | CB  | . ILE ILE ILE B B 2 | 2 | . 0.1711 0.1584 0.1628 0.0137    |
| 0.0275 | -0.0051 | 1 . |                     |   |                                  |
| 3348   | CG1     | CG1 | . ILE ILE ILE B B 2 | 2 | . 0.1654 0.1344 0.1420 0.0082    |
| 0.0352 | 0.0275  | 1 . |                     |   |                                  |
| 3349   | CD1     | CD1 | . ILE ILE ILE B B 2 | 2 | . 0.1614 0.1042 0.1891 0.0096 -  |
| 0.0392 | 0.0129  | 1 . |                     |   |                                  |
| 3350   | CG2     | CG2 | . ILE ILE ILE B B 2 | 2 | . 0.1550 0.1771 0.1666 0.0501 -  |
| 0.0021 | -0.0375 | 1 . |                     |   |                                  |
| 3351   | C       | C   | . ILE ILE ILE B B 2 | 2 | . 0.1670 0.1656 0.1798 0.0188    |
| 0.0139 | 0.0007  | 1 . |                     |   |                                  |
| 3352   | O       | O   | . ILE ILE ILE B B 2 | 2 | . 0.1194 0.1615 0.1761 0.0196 -  |
| 0.0006 | 0.0088  | 1 . |                     |   |                                  |
| 3353   | N       | N   | . GLN GLN GLN B B 3 | 3 | . 0.1514 0.1395 0.1597 0.0204    |
| 0.0106 | 0.0107  | 1 . |                     |   |                                  |
| 3354   | CA      | CA  | . GLN GLN GLN B B 3 | 3 | . 0.1836 0.1857 0.1860 0.0124    |
| 0.0128 | 0.0150  | 1 . |                     |   |                                  |
| 3355   | CB      | CB  | . GLN GLN GLN B B 3 | 3 | . 0.1767 0.1827 0.2029 0.0189    |
| 0.0052 | 0.0074  | 1 . |                     |   |                                  |
| 3356   | CG      | CG  | . GLN GLN GLN B B 3 | 3 | . 0.2098 0.2113 0.2342 0.0024    |
| 0.0065 | 0.0037  | 1 . |                     |   |                                  |
| 3357   | CD      | CD  | . GLN GLN GLN B B 3 | 3 | . 0.2489 0.2302 0.2869 0.0204 -  |
| 0.0239 | -0.0015 | 1 . |                     |   |                                  |
| 3358   | OE1     | OE1 | . GLN GLN GLN B B 3 | 3 | . 0.2510 0.2357 0.2832 0.0492 -  |
| 0.0408 | -0.0062 | 1 . |                     |   |                                  |
| 3359   | NE2     | NE2 | . GLN GLN GLN B B 3 | 3 | . 0.2729 0.2945 0.3512 -0.0007 - |
| 0.0109 | 0.0007  | 1 . |                     |   |                                  |
| 3360   | C       | C   | . GLN GLN GLN B B 3 | 3 | . 0.1640 0.1805 0.1668 0.0184    |
| 0.0139 | 0.0130  | 1 . |                     |   |                                  |
| 3361   | O       | O   | . GLN GLN GLN B B 3 | 3 | . 0.1737 0.2086 0.1695 0.0353    |
| 0.0284 | 0.0132  | 1 . |                     |   |                                  |
| 3362   | N       | N   | . LYS LYS LYS B B 4 | 4 | . 0.1356 0.1654 0.1407 0.0232    |
| 0.0218 | 0.0109  | 1 . |                     |   |                                  |
| 3363   | CA      | CA  | . LYS LYS LYS B B 4 | 4 | . 0.1320 0.1431 0.1089 0.0166    |
| 0.0244 | 0.0160  | 1 . |                     |   |                                  |
| 3364   | CB      | CB  | . LYS LYS LYS B B 4 | 4 | . 0.1071 0.1382 0.1098 0.0180    |
| 0.0398 | 0.0422  | 1 . |                     |   |                                  |
| 3365   | CG      | CG  | . LYS LYS LYS B B 4 | 4 | . 0.1787 0.2178 0.1287 0.0115    |
| 0.0329 | 0.0335  | 1 . |                     |   |                                  |































|        |         |     |                           |        |        |        |         |   |
|--------|---------|-----|---------------------------|--------|--------|--------|---------|---|
| 3717   | N       | N   | . ASP ASP ASP B B 50 50 . | 0.0947 | 0.0580 | 0.0347 | 0.0285  |   |
| 0.0023 | -0.0129 | 1 . |                           |        |        |        |         |   |
| 3718   | CA      | CA  | . ASP ASP ASP B B 50 50 . | 0.1133 | 0.0603 | 0.0905 | 0.0176  |   |
| 0.0034 | -0.0248 | 1 . |                           |        |        |        |         |   |
| 3719   | CB      | CB  | . ASP ASP ASP B B 50 50 . | 0.0833 | 0.0636 | 0.0472 | 0.0250  | - |
| 0.0083 | -0.0013 | 1 . |                           |        |        |        |         |   |
| 3720   | CG      | CG  | . ASP ASP ASP B B 50 50 . | 0.0863 | 0.0716 | 0.0752 | 0.0348  | - |
| 0.0033 | -0.0381 | 1 . |                           |        |        |        |         |   |
| 3721   | OD1     | OD1 | . ASP ASP ASP B B 50 50 . | 0.0478 | 0.0700 | 0.0472 | 0.0316  |   |
| 0.0195 | 0.0262  | 1 . |                           |        |        |        |         |   |
| 3722   | OD2     | OD2 | . ASP ASP ASP B B 50 50 . | 0.0999 | 0.0704 | 0.0281 | 0.0388  | - |
| 0.0044 | -0.0102 | 1 . |                           |        |        |        |         |   |
| 3723   | C       | C   | . ASP ASP ASP B B 50 50 . | 0.1236 | 0.0865 | 0.1007 | 0.0127  | - |
| 0.0100 | -0.0069 | 1 . |                           |        |        |        |         |   |
| 3724   | O       | O   | . ASP ASP ASP B B 50 50 . | 0.1640 | 0.0962 | 0.1065 | 0.0332  | - |
| 0.0128 | -0.0158 | 1 . |                           |        |        |        |         |   |
| 3725   | N       | N   | . GLY GLY GLY B B 51 51 . | 0.1256 | 0.0786 | 0.0921 | 0.0161  |   |
| 0.0091 | -0.0089 | 1 . |                           |        |        |        |         |   |
| 3726   | CA      | CA  | . GLY GLY GLY B B 51 51 . | 0.1306 | 0.1032 | 0.1395 | 0.0095  | - |
| 0.0115 | 0.0071  | 1 . |                           |        |        |        |         |   |
| 3727   | C       | C   | . GLY GLY GLY B B 51 51 . | 0.1784 | 0.1179 | 0.1670 | -0.0001 |   |
| 0.0005 | -0.0065 | 1 . |                           |        |        |        |         |   |
| 3728   | O       | O   | . GLY GLY GLY B B 51 51 . | 0.2007 | 0.1029 | 0.1587 | -0.0262 | - |
| 0.0194 | -0.0196 | 1 . |                           |        |        |        |         |   |
| 3729   | N       | N   | . ASP ASP ASP B B 52 52 . | 0.1630 | 0.1282 | 0.1508 | 0.0026  |   |
| 0.0041 | -0.0042 | 1 . |                           |        |        |        |         |   |
| 3730   | CA      | CA  | . ASP ASP ASP B B 52 52 . | 0.1840 | 0.1392 | 0.1592 | 0.0040  |   |
| 0.0041 | -0.0171 | 1 . |                           |        |        |        |         |   |
| 3731   | CB      | CB  | . ASP ASP ASP B B 52 52 . | 0.1799 | 0.1574 | 0.1567 | 0.0059  | - |
| 0.0028 | -0.0231 | 1 . |                           |        |        |        |         |   |
| 3732   | CG      | CG  | . ASP ASP ASP B B 52 52 . | 0.2006 | 0.1559 | 0.1396 | 0.0038  |   |
| 0.0093 | -0.0357 | 1 . |                           |        |        |        |         |   |
| 3733   | OD1     | OD1 | . ASP ASP ASP B B 52 52 . | 0.1510 | 0.1409 | 0.1429 | 0.0224  | - |
| 0.0674 | -0.0247 | 1 . |                           |        |        |        |         |   |
| 3734   | OD2     | OD2 | . ASP ASP ASP B B 52 52 . | 0.1400 | 0.1478 | 0.1212 | 0.0378  |   |
| 0.0558 | -0.0597 | 1 . |                           |        |        |        |         |   |
| 3735   | C       | C   | . ASP ASP ASP B B 52 52 . | 0.1909 | 0.1464 | 0.1721 | 0.0017  |   |
| 0.0068 | -0.0073 | 1 . |                           |        |        |        |         |   |
| 3736   | O       | O   | . ASP ASP ASP B B 52 52 . | 0.2091 | 0.1418 | 0.1854 | 0.0252  |   |
| 0.0253 | -0.0336 | 1 . |                           |        |        |        |         |   |
| 3737   | N       | N   | . LYS LYS LYS B B 53 53 . | 0.2118 | 0.1736 | 0.1971 | -0.0072 |   |
| 0.0018 | -0.0174 | 1 . |                           |        |        |        |         |   |
| 3738   | CA      | CA  | . LYS LYS LYS B B 53 53 . | 0.2282 | 0.1942 | 0.2117 | -0.0161 | - |
| 0.0072 | 0.0021  | 1 . |                           |        |        |        |         |   |
| 3739   | CB      | CB  | . LYS LYS LYS B B 53 53 . | 0.2322 | 0.1918 | 0.2329 | -0.0322 | - |
| 0.0109 | 0.0038  | 1 . |                           |        |        |        |         |   |
| 3740   | CG      | CG  | . LYS LYS LYS B B 53 53 . | 0.2768 | 0.2619 | 0.2481 | -0.0318 | - |
| 0.0296 | -0.0030 | 1 . |                           |        |        |        |         |   |
| 3741   | CD      | CD  | . LYS LYS LYS B B 53 53 . | 0.3234 | 0.3088 | 0.2979 | -0.0489 |   |
| 0.0005 | 0.0068  | 1 . |                           |        |        |        |         |   |
| 3742   | CE      | CE  | . LYS LYS LYS B B 53 53 . | 0.3626 | 0.3446 | 0.3471 | -0.0466 | - |
| 0.0270 | 0.0121  | 1 . |                           |        |        |        |         |   |
| 3743   | NZ      | NZ  | . LYS LYS LYS B B 53 53 . | 0.3939 | 0.3398 | 0.3960 | -0.0444 | - |
| 0.0373 | 0.0211  | 1 . |                           |        |        |        |         |   |

















































































|        |         |     |                             |        |        |        |         |   |
|--------|---------|-----|-----------------------------|--------|--------|--------|---------|---|
| 4689   | CB      | CB  | . MET MET MET B B 181 181 . | 0.0323 | 0.0274 | 0.0320 | 0.0038  |   |
| 0.0068 | 0.0037  | 1 . |                             |        |        |        |         |   |
| 4690   | CG      | CG  | . MET MET MET B B 181 181 . | 0.0253 | 0.0380 | 0.0393 | -0.0006 |   |
| 0.0007 | -0.0133 | 1 . |                             |        |        |        |         |   |
| 4691   | SD      | SD  | . MET MET MET B B 181 181 . | 0.0529 | 0.0350 | 0.0401 | 0.0135  |   |
| 0.0021 | 0.0053  | 1 . |                             |        |        |        |         |   |
| 4692   | CE      | CE  | . MET MET MET B B 181 181 . | 0.1214 | 0.0690 | 0.0781 | -0.0055 | - |
| 0.0096 | -0.0339 | 1 . |                             |        |        |        |         |   |
| 4693   | C       | C   | . MET MET MET B B 181 181 . | 0.0253 | 0.0253 | 0.0253 | 0.0000  |   |
| 0.0000 | 0.0000  | 1 . |                             |        |        |        |         |   |
| 4694   | O       | O   | . MET MET MET B B 181 181 . | 0.0259 | 0.0254 | 0.0260 | 0.0003  |   |
| 0.0006 | 0.0003  | 1 . |                             |        |        |        |         |   |
| 4695   | N       | N   | . ARG ARG ARG B B 182 182 . | 0.0313 | 0.0280 | 0.0262 | 0.0040  |   |
| 0.0023 | 0.0015  | 1 . |                             |        |        |        |         |   |
| 4696   | CA      | CA  | . ARG ARG ARG B B 182 182 . | 0.0316 | 0.0309 | 0.0390 | 0.0015  |   |
| 0.0064 | -0.0045 | 1 . |                             |        |        |        |         |   |
| 4697   | CB      | CB  | . ARG ARG ARG B B 182 182 . | 0.0382 | 0.0344 | 0.0253 | 0.0108  | - |
| 0.0005 | -0.0004 | 1 . |                             |        |        |        |         |   |
| 4698   | CG      | CG  | . ARG ARG ARG B B 182 182 . | 0.0556 | 0.0649 | 0.0679 | 0.0235  |   |
| 0.0053 | 0.0252  | 1 . |                             |        |        |        |         |   |
| 4699   | CD      | CD  | . ARG ARG ARG B B 182 182 . | 0.1399 | 0.0786 | 0.1227 | 0.0065  | - |
| 0.0130 | 0.0331  | 1 . |                             |        |        |        |         |   |
| 4700   | NE      | NE  | . ARG ARG ARG B B 182 182 . | 0.1763 | 0.1265 | 0.1834 | 0.0307  | - |
| 0.0019 | -0.0205 | 1 . |                             |        |        |        |         |   |
| 4701   | CZ      | CZ  | . ARG ARG ARG B B 182 182 . | 0.2238 | 0.2109 | 0.2273 | 0.0283  |   |
| 0.0154 | 0.0349  | 1 . |                             |        |        |        |         |   |
| 4702   | NH1     | NH1 | . ARG ARG ARG B B 182 182 . | 0.1954 | 0.2011 | 0.2518 | 0.0179  |   |
| 0.1111 | -0.0025 | 1 . |                             |        |        |        |         |   |
| 4703   | NH2     | NH2 | . ARG ARG ARG B B 182 182 . | 0.2194 | 0.2966 | 0.2656 | 0.0331  |   |
| 0.0427 | -0.0343 | 1 . |                             |        |        |        |         |   |
| 4704   | C       | C   | . ARG ARG ARG B B 182 182 . | 0.0253 | 0.0253 | 0.0253 | 0.0000  |   |
| 0.0000 | 0.0000  | 1 . |                             |        |        |        |         |   |
| 4705   | O       | O   | . ARG ARG ARG B B 182 182 . | 0.0276 | 0.0256 | 0.0264 | 0.0009  |   |
| 0.0015 | 0.0006  | 1 . |                             |        |        |        |         |   |
| 4706   | N       | N   | . LEU LEU LEU B B 183 183 . | 0.0352 | 0.0273 | 0.0462 | 0.0032  |   |
| 0.0051 | -0.0026 | 1 . |                             |        |        |        |         |   |
| 4707   | CA      | CA  | . LEU LEU LEU B B 183 183 . | 0.0485 | 0.0345 | 0.0277 | 0.0123  | - |
| 0.0025 | -0.0038 | 1 . |                             |        |        |        |         |   |
| 4708   | CB      | CB  | . LEU LEU LEU B B 183 183 . | 0.0709 | 0.0425 | 0.0376 | 0.0249  | - |
| 0.0142 | -0.0024 | 1 . |                             |        |        |        |         |   |
| 4709   | CG      | CG  | . LEU LEU LEU B B 183 183 . | 0.1471 | 0.0604 | 0.0554 | -0.0057 | - |
| 0.0249 | 0.0025  | 1 . |                             |        |        |        |         |   |
| 4710   | CD1     | CD1 | . LEU LEU LEU B B 183 183 . | 0.1128 | 0.0742 | 0.0625 | 0.0214  |   |
| 0.0224 | -0.0315 | 1 . |                             |        |        |        |         |   |
| 4711   | CD2     | CD2 | . LEU LEU LEU B B 183 183 . | 0.1580 | 0.0999 | 0.0518 | 0.0174  |   |
| 0.0177 | 0.0074  | 1 . |                             |        |        |        |         |   |
| 4712   | C       | C   | . LEU LEU LEU B B 183 183 . | 0.0308 | 0.0296 | 0.0253 | -0.0048 | - |
| 0.0004 | 0.0003  | 1 . |                             |        |        |        |         |   |
| 4713   | O       | O   | . LEU LEU LEU B B 183 183 . | 0.0375 | 0.0552 | 0.0279 | 0.0191  | - |
| 0.0056 | -0.0089 | 1 . |                             |        |        |        |         |   |
| 4714   | N       | N   | . GLY GLY GLY B B 184 184 . | 0.0359 | 0.0275 | 0.0275 | 0.0047  |   |
| 0.0048 | 0.0022  | 1 . |                             |        |        |        |         |   |
| 4715   | CA      | CA  | . GLY GLY GLY B B 184 184 . | 0.0267 | 0.0288 | 0.0276 | 0.0022  |   |
| 0.0017 | 0.0028  | 1 . |                             |        |        |        |         |   |

|        |         |     |                             |        |        |        |         |   |
|--------|---------|-----|-----------------------------|--------|--------|--------|---------|---|
| 4716   | C       | C   | . GLY GLY GLY B B 184 184 . | 0.0256 | 0.0254 | 0.0266 | 0.0001  |   |
| 0.0006 | 0.0003  | 1 . |                             |        |        |        |         |   |
| 4717   | O       | O   | . GLY GLY GLY B B 184 184 . | 0.0311 | 0.0305 | 0.0429 | 0.0053  |   |
| 0.0045 | 0.0062  | 1 . |                             |        |        |        |         |   |
| 4718   | N       | N   | . ALA ALA ALA B B 185 185 . | 0.0358 | 0.0280 | 0.0289 | 0.0052  | - |
| 0.0002 | 0.0006  | 1 . |                             |        |        |        |         |   |
| 4719   | CA      | CA  | . ALA ALA ALA B B 185 185 . | 0.0403 | 0.0337 | 0.0265 | 0.0112  |   |
| 0.0042 | 0.0031  | 1 . |                             |        |        |        |         |   |
| 4720   | CB      | CB  | . ALA ALA ALA B B 185 185 . | 0.0376 | 0.0329 | 0.0281 | 0.0096  |   |
| 0.0058 | 0.0045  | 1 . |                             |        |        |        |         |   |
| 4721   | C       | C   | . ALA ALA ALA B B 185 185 . | 0.0310 | 0.0279 | 0.0253 | 0.0037  | - |
| 0.0001 | -0.0001 | 1 . |                             |        |        |        |         |   |
| 4722   | O       | O   | . ALA ALA ALA B B 185 185 . | 0.0663 | 0.0503 | 0.0527 | 0.0043  |   |
| 0.0237 | -0.0157 | 1 . |                             |        |        |        |         |   |
| 4723   | N       | N   | . GLU GLU GLU B B 186 186 . | 0.0537 | 0.0338 | 0.0288 | 0.0123  | - |
| 0.0041 | -0.0048 | 1 . |                             |        |        |        |         |   |
| 4724   | CA      | CA  | . GLU GLU GLU B B 186 186 . | 0.0320 | 0.0349 | 0.0290 | 0.0074  |   |
| 0.0035 | 0.0024  | 1 . |                             |        |        |        |         |   |
| 4725   | CB      | CB  | . GLU GLU GLU B B 186 186 . | 0.0448 | 0.0366 | 0.0300 | 0.0101  |   |
| 0.0081 | 0.0013  | 1 . |                             |        |        |        |         |   |
| 4726   | CG      | CG  | . GLU GLU GLU B B 186 186 . | 0.0536 | 0.0260 | 0.0329 | 0.0046  |   |
| 0.0146 | 0.0023  | 1 . |                             |        |        |        |         |   |
| 4727   | CD      | CD  | . GLU GLU GLU B B 186 186 . | 0.1269 | 0.0531 | 0.0560 | 0.0073  |   |
| 0.0338 | 0.0126  | 1 . |                             |        |        |        |         |   |
| 4728   | OE1     | OE1 | . GLU GLU GLU B B 186 186 . | 0.1368 | 0.0912 | 0.1116 | 0.0279  |   |
| 0.0771 | 0.0204  | 1 . |                             |        |        |        |         |   |
| 4729   | OE2     | OE2 | . GLU GLU GLU B B 186 186 . | 0.0986 | 0.0362 | 0.0713 | -0.0110 |   |
| 0.0316 | 0.0020  | 1 . |                             |        |        |        |         |   |
| 4730   | C       | C   | . GLU GLU GLU B B 186 186 . | 0.0373 | 0.0330 | 0.0265 | 0.0096  | - |
| 0.0022 | -0.0016 | 1 . |                             |        |        |        |         |   |
| 4731   | O       | O   | . GLU GLU GLU B B 186 186 . | 0.0414 | 0.0450 | 0.0329 | -0.0085 |   |
| 0.0070 | -0.0058 | 1 . |                             |        |        |        |         |   |
| 4732   | N       | N   | . VAL VAL VAL B B 187 187 . | 0.0360 | 0.0333 | 0.0407 | -0.0023 |   |
| 0.0125 | -0.0050 | 1 . |                             |        |        |        |         |   |
| 4733   | CA      | CA  | . VAL VAL VAL B B 187 187 . | 0.0413 | 0.0348 | 0.0299 | -0.0060 | - |
| 0.0015 | 0.0062  | 1 . |                             |        |        |        |         |   |
| 4734   | CB      | CB  | . VAL VAL VAL B B 187 187 . | 0.0622 | 0.0414 | 0.0339 | 0.0045  | - |
| 0.0168 | 0.0018  | 1 . |                             |        |        |        |         |   |
| 4735   | CG1     | CG1 | . VAL VAL VAL B B 187 187 . | 0.0352 | 0.0400 | 0.0302 | -0.0002 |   |
| 0.0030 | -0.0077 | 1 . |                             |        |        |        |         |   |
| 4736   | CG2     | CG2 | . VAL VAL VAL B B 187 187 . | 0.0595 | 0.0488 | 0.0276 | 0.0248  |   |
| 0.0063 | 0.0021  | 1 . |                             |        |        |        |         |   |
| 4737   | C       | C   | . VAL VAL VAL B B 187 187 . | 0.0253 | 0.0254 | 0.0388 | 0.0000  |   |
| 0.0003 | -0.0011 | 1 . |                             |        |        |        |         |   |
| 4738   | O       | O   | . VAL VAL VAL B B 187 187 . | 0.0362 | 0.0295 | 0.0509 | 0.0022  |   |
| 0.0139 | -0.0024 | 1 . |                             |        |        |        |         |   |
| 4739   | N       | N   | . TYR TYR TYR B B 188 188 . | 0.0554 | 0.0295 | 0.0255 | 0.0009  |   |
| 0.0019 | 0.0006  | 1 . |                             |        |        |        |         |   |
| 4740   | CA      | CA  | . TYR TYR TYR B B 188 188 . | 0.0322 | 0.0538 | 0.0379 | -0.0027 |   |
| 0.0057 | -0.0115 | 1 . |                             |        |        |        |         |   |
| 4741   | CB      | CB  | . TYR TYR TYR B B 188 188 . | 0.0432 | 0.0351 | 0.0474 | 0.0073  |   |
| 0.0041 | -0.0102 | 1 . |                             |        |        |        |         |   |
| 4742   | CG      | CG  | . TYR TYR TYR B B 188 188 . | 0.0904 | 0.0592 | 0.0350 | -0.0005 |   |
| 0.0250 | 0.0011  | 1 . |                             |        |        |        |         |   |



































|        |         |     |                             |        |        |        |         |   |
|--------|---------|-----|-----------------------------|--------|--------|--------|---------|---|
| 5148   | CD1     | CD1 | . ILE ILE ILE B B 241 241 . | 0.0844 | 0.0566 | 0.0944 | 0.0266  | - |
| 0.0415 | -0.0091 | 1 . |                             |        |        |        |         |   |
| 5149   | CG2     | CG2 | . ILE ILE ILE B B 241 241 . | 0.0415 | 0.0351 | 0.0431 | -0.0041 |   |
| 0.0153 | -0.0091 | 1 . |                             |        |        |        |         |   |
| 5150   | C       | C   | . ILE ILE ILE B B 241 241 . | 0.0542 | 0.0551 | 0.0276 | 0.0121  | - |
| 0.0064 | -0.0075 | 1 . |                             |        |        |        |         |   |
| 5151   | O       | O   | . ILE ILE ILE B B 241 241 . | 0.0855 | 0.0423 | 0.0380 | 0.0298  |   |
| 0.0275 | 0.0131  | 1 . |                             |        |        |        |         |   |
| 5152   | N       | N   | . GLY GLY GLY B B 242 242 . | 0.0486 | 0.0652 | 0.0368 | 0.0275  |   |
| 0.0088 | 0.0026  | 1 . |                             |        |        |        |         |   |
| 5153   | CA      | CA  | . GLY GLY GLY B B 242 242 . | 0.0253 | 0.0253 | 0.0253 | 0.0000  |   |
| 0.0000 | 0.0000  | 1 . |                             |        |        |        |         |   |
| 5154   | C       | C   | . GLY GLY GLY B B 242 242 . | 0.0375 | 0.0367 | 0.0277 | -0.0043 |   |
| 0.0053 | -0.0020 | 1 . |                             |        |        |        |         |   |
| 5155   | O       | O   | . GLY GLY GLY B B 242 242 . | 0.0400 | 0.0261 | 0.0275 | 0.0033  | - |
| 0.0057 | -0.0013 | 1 . |                             |        |        |        |         |   |
| 5156   | N       | N   | . MET MET MET B B 243 243 . | 0.0259 | 0.0303 | 0.0314 | 0.0017  |   |
| 0.0018 | 0.0055  | 1 . |                             |        |        |        |         |   |
| 5157   | CA      | CA  | . MET MET MET B B 243 243 . | 0.0708 | 0.0581 | 0.0500 | 0.0176  |   |
| 0.0105 | -0.0017 | 1 . |                             |        |        |        |         |   |
| 5158   | CB      | CB  | . MET MET MET B B 243 243 . | 0.0627 | 0.0586 | 0.0853 | 0.0170  | - |
| 0.0036 | 0.0085  | 1 . |                             |        |        |        |         |   |
| 5159   | CG      | CG  | . MET MET MET B B 243 243 . | 0.0690 | 0.0937 | 0.0433 | -0.0035 |   |
| 0.0243 | -0.0193 | 1 . |                             |        |        |        |         |   |
| 5160   | SD      | SD  | . MET MET MET B B 243 243 . | 0.0817 | 0.0641 | 0.0654 | -0.0121 |   |
| 0.0121 | -0.0178 | 1 . |                             |        |        |        |         |   |
| 5161   | CE      | CE  | . MET MET MET B B 243 243 . | 0.0902 | 0.1225 | 0.0989 | -0.0397 | - |
| 0.0257 | -0.0522 | 1 . |                             |        |        |        |         |   |
| 5162   | C       | C   | . MET MET MET B B 243 243 . | 0.0467 | 0.0353 | 0.0362 | 0.0146  | - |
| 0.0127 | -0.0085 | 1 . |                             |        |        |        |         |   |
| 5163   | O       | O   | . MET MET MET B B 243 243 . | 0.0513 | 0.0690 | 0.0361 | 0.0073  | - |
| 0.0066 | -0.0213 | 1 . |                             |        |        |        |         |   |
| 5164   | N       | N   | . ASP ASP ASP B B 244 244 . | 0.0645 | 0.0623 | 0.0286 | 0.0194  |   |
| 0.0092 | -0.0009 | 1 . |                             |        |        |        |         |   |
| 5165   | CA      | CA  | . ASP ASP ASP B B 244 244 . | 0.0412 | 0.0290 | 0.0254 | 0.0074  |   |
| 0.0010 | 0.0006  | 1 . |                             |        |        |        |         |   |
| 5166   | CB      | CB  | . ASP ASP ASP B B 244 244 . | 0.0559 | 0.0422 | 0.0460 | 0.0221  |   |
| 0.0194 | 0.0113  | 1 . |                             |        |        |        |         |   |
| 5167   | CG      | CG  | . ASP ASP ASP B B 244 244 . | 0.0577 | 0.0306 | 0.0273 | 0.0131  |   |
| 0.0080 | 0.0032  | 1 . |                             |        |        |        |         |   |
| 5168   | OD1     | OD1 | . ASP ASP ASP B B 244 244 . | 0.0288 | 0.0396 | 0.0301 | 0.0064  |   |
| 0.0030 | 0.0031  | 1 . |                             |        |        |        |         |   |
| 5169   | OD2     | OD2 | . ASP ASP ASP B B 244 244 . | 0.0277 | 0.0265 | 0.0361 | -0.0017 |   |
| 0.0051 | -0.0035 | 1 . |                             |        |        |        |         |   |
| 5170   | C       | C   | . ASP ASP ASP B B 244 244 . | 0.0474 | 0.0294 | 0.0269 | 0.0030  | - |
| 0.0025 | -0.0025 | 1 . |                             |        |        |        |         |   |
| 5171   | O       | O   | . ASP ASP ASP B B 244 244 . | 0.0423 | 0.0292 | 0.0489 | 0.0058  | - |
| 0.0200 | -0.0063 | 1 . |                             |        |        |        |         |   |
| 5172   | N       | N   | . VAL VAL VAL B B 245 245 . | 0.0258 | 0.0393 | 0.0293 | 0.0026  |   |
| 0.0014 | 0.0075  | 1 . |                             |        |        |        |         |   |
| 5173   | CA      | CA  | . VAL VAL VAL B B 245 245 . | 0.0357 | 0.0273 | 0.0284 | 0.0027  | - |
| 0.0056 | -0.0014 | 1 . |                             |        |        |        |         |   |
| 5174   | CB      | CB  | . VAL VAL VAL B B 245 245 . | 0.0384 | 0.0318 | 0.0460 | 0.0029  |   |
| 0.0016 | 0.0112  | 1 . |                             |        |        |        |         |   |





















|      |        |         |                             |        |        |        |         |   |
|------|--------|---------|-----------------------------|--------|--------|--------|---------|---|
| 5418 | CG     | CG      | . LEU LEU LEU B B 275 275 . | 0.1291 | 0.1039 | 0.1183 | 0.0136  |   |
|      | 0.0174 | -0.0113 | 1 .                         |        |        |        |         |   |
| 5419 | CD1    | CD1     | . LEU LEU LEU B B 275 275 . | 0.1422 | 0.0597 | 0.1897 | -0.0095 | - |
|      | 0.0029 | 0.0061  | 1 .                         |        |        |        |         |   |
| 5420 | CD2    | CD2     | . LEU LEU LEU B B 275 275 . | 0.0874 | 0.0621 | 0.0648 | 0.0098  |   |
|      | 0.0492 | 0.0038  | 1 .                         |        |        |        |         |   |
| 5421 | C      | C       | . LEU LEU LEU B B 275 275 . | 0.1062 | 0.0878 | 0.1155 | 0.0075  | - |
|      | 0.0023 | -0.0027 | 1 .                         |        |        |        |         |   |
| 5422 | O      | O       | . LEU LEU LEU B B 275 275 . | 0.1149 | 0.0863 | 0.1145 | 0.0122  | - |
|      | 0.0108 | 0.0113  | 1 .                         |        |        |        |         |   |
| 5423 | N      | N       | . GLY GLY GLY B B 276 276 . | 0.0605 | 0.0673 | 0.1193 | -0.0018 |   |
|      | 0.0046 | 0.0026  | 1 .                         |        |        |        |         |   |
| 5424 | CA     | CA      | . GLY GLY GLY B B 276 276 . | 0.1016 | 0.0858 | 0.0934 | 0.0077  |   |
|      | 0.0063 | 0.0061  | 1 .                         |        |        |        |         |   |
| 5425 | C      | C       | . GLY GLY GLY B B 276 276 . | 0.1085 | 0.0727 | 0.1089 | 0.0074  |   |
|      | 0.0068 | 0.0059  | 1 .                         |        |        |        |         |   |
| 5426 | O      | O       | . GLY GLY GLY B B 276 276 . | 0.1343 | 0.0754 | 0.1324 | 0.0186  | - |
|      | 0.0030 | 0.0473  | 1 .                         |        |        |        |         |   |
| 5427 | N      | N       | . ALA ALA ALA B B 277 277 . | 0.0938 | 0.0871 | 0.1192 | 0.0039  |   |
|      | 0.0221 | 0.0200  | 1 .                         |        |        |        |         |   |
| 5428 | CA     | CA      | . ALA ALA ALA B B 277 277 . | 0.0910 | 0.0759 | 0.1172 | -0.0067 |   |
|      | 0.0271 | 0.0324  | 1 .                         |        |        |        |         |   |
| 5429 | CB     | CB      | . ALA ALA ALA B B 277 277 . | 0.1157 | 0.1032 | 0.1677 | -0.0059 |   |
|      | 0.0212 | 0.0322  | 1 .                         |        |        |        |         |   |
| 5430 | C      | C       | . ALA ALA ALA B B 277 277 . | 0.0995 | 0.0852 | 0.1070 | 0.0035  |   |
|      | 0.0065 | 0.0118  | 1 .                         |        |        |        |         |   |
| 5431 | O      | O       | . ALA ALA ALA B B 277 277 . | 0.1076 | 0.1255 | 0.1567 | 0.0030  |   |
|      | 0.0068 | 0.0137  | 1 .                         |        |        |        |         |   |
| 5432 | N      | N       | . LEU LEU LEU B B 278 278 . | 0.0896 | 0.0797 | 0.1285 | -0.0069 | - |
|      | 0.0113 | 0.0029  | 1 .                         |        |        |        |         |   |
| 5433 | CA     | CA      | . LEU LEU LEU B B 278 278 . | 0.0900 | 0.0903 | 0.1033 | -0.0022 | - |
|      | 0.0048 | 0.0040  | 1 .                         |        |        |        |         |   |
| 5434 | CB     | CB      | . LEU LEU LEU B B 278 278 . | 0.1087 | 0.1069 | 0.1023 | 0.0061  | - |
|      | 0.0034 | 0.0009  | 1 .                         |        |        |        |         |   |
| 5435 | CG     | CG      | . LEU LEU LEU B B 278 278 . | 0.0745 | 0.1823 | 0.1486 | 0.0041  | - |
|      | 0.0215 | -0.0107 | 1 .                         |        |        |        |         |   |
| 5436 | CD1    | CD1     | . LEU LEU LEU B B 278 278 . | 0.1224 | 0.2435 | 0.2297 | 0.0342  |   |
|      | 0.0093 | -0.0511 | 1 .                         |        |        |        |         |   |
| 5437 | CD2    | CD2     | . LEU LEU LEU B B 278 278 . | 0.0845 | 0.2242 | 0.1710 | 0.0087  | - |
|      | 0.0901 | -0.0168 | 1 .                         |        |        |        |         |   |
| 5438 | C      | C       | . LEU LEU LEU B B 278 278 . | 0.0728 | 0.0591 | 0.0912 | 0.0023  | - |
|      | 0.0064 | -0.0032 | 1 .                         |        |        |        |         |   |
| 5439 | O      | O       | . LEU LEU LEU B B 278 278 . | 0.0870 | 0.0616 | 0.1160 | 0.0016  | - |
|      | 0.0136 | -0.0187 | 1 .                         |        |        |        |         |   |
| 5440 | N      | N       | . TYR TYR TYR B B 279 279 . | 0.0974 | 0.0842 | 0.0778 | 0.0079  | - |
|      | 0.0001 | 0.0024  | 1 .                         |        |        |        |         |   |
| 5441 | CA     | CA      | . TYR TYR TYR B B 279 279 . | 0.0894 | 0.0731 | 0.0625 | 0.0097  | - |
|      | 0.0008 | 0.0001  | 1 .                         |        |        |        |         |   |
| 5442 | CB     | CB      | . TYR TYR TYR B B 279 279 . | 0.0840 | 0.0549 | 0.0460 | 0.0014  | - |
|      | 0.0027 | 0.0014  | 1 .                         |        |        |        |         |   |
| 5443 | CG     | CG      | . TYR TYR TYR B B 279 279 . | 0.0253 | 0.0253 | 0.0253 | 0.0000  |   |
|      | 0.0000 | 0.0000  | 1 .                         |        |        |        |         |   |
| 5444 | CD1    | CD1     | . TYR TYR TYR B B 279 279 . | 0.0254 | 0.0256 | 0.0450 | 0.0002  | - |
|      | 0.0013 | -0.0018 | 1 .                         |        |        |        |         |   |

|      |        |         |                             |        |        |        |         |   |
|------|--------|---------|-----------------------------|--------|--------|--------|---------|---|
| 5445 | CE1    | CE1     | . TYR TYR TYR B B 279 279 . | 0.0359 | 0.0265 | 0.0305 | 0.0035  |   |
|      | 0.0074 | 0.0024  | 1 .                         |        |        |        |         |   |
| 5446 | CZ     | CZ      | . TYR TYR TYR B B 279 279 . | 0.0588 | 0.0414 | 0.0425 | 0.0067  | - |
|      | 0.0233 | -0.0084 | 1 .                         |        |        |        |         |   |
| 5447 | OH     | OH      | . TYR TYR TYR B B 279 279 . | 0.0484 | 0.0566 | 0.0444 | 0.0184  | - |
|      | 0.0078 | -0.0004 | 1 .                         |        |        |        |         |   |
| 5448 | CE2    | CE2     | . TYR TYR TYR B B 279 279 . | 0.0439 | 0.0361 | 0.0259 | 0.0131  | - |
|      | 0.0023 | -0.0009 | 1 .                         |        |        |        |         |   |
| 5449 | CD2    | CD2     | . TYR TYR TYR B B 279 279 . | 0.0618 | 0.0530 | 0.0326 | 0.0318  | - |
|      | 0.0163 | -0.0142 | 1 .                         |        |        |        |         |   |
| 5450 | C      | C       | . TYR TYR TYR B B 279 279 . | 0.0763 | 0.0544 | 0.0439 | 0.0050  | - |
|      | 0.0066 | 0.0051  | 1 .                         |        |        |        |         |   |
| 5451 | O      | O       | . TYR TYR TYR B B 279 279 . | 0.1030 | 0.0738 | 0.0575 | 0.0126  |   |
|      | 0.0044 | -0.0203 | 1 .                         |        |        |        |         |   |
| 5452 | N      | N       | . GLN GLN GLN B B 280 280 . | 0.0808 | 0.1015 | 0.0301 | 0.0090  |   |
|      | 0.0131 | -0.0073 | 1 .                         |        |        |        |         |   |
| 5453 | CA     | CA      | . GLN GLN GLN B B 280 280 . | 0.0801 | 0.0589 | 0.0674 | 0.0118  |   |
|      | 0.0124 | -0.0156 | 1 .                         |        |        |        |         |   |
| 5454 | CB     | CB      | . GLN GLN GLN B B 280 280 . | 0.1024 | 0.0631 | 0.0589 | 0.0013  | - |
|      | 0.0003 | -0.0113 | 1 .                         |        |        |        |         |   |
| 5455 | CG     | CG      | . GLN GLN GLN B B 280 280 . | 0.1265 | 0.1307 | 0.1507 | 0.0400  |   |
|      | 0.0008 | -0.0253 | 1 .                         |        |        |        |         |   |
| 5456 | CD     | CD      | . GLN GLN GLN B B 280 280 . | 0.1922 | 0.1461 | 0.1963 | 0.0379  | - |
|      | 0.0104 | -0.0063 | 1 .                         |        |        |        |         |   |
| 5457 | OE1    | OE1     | . GLN GLN GLN B B 280 280 . | 0.2974 | 0.1840 | 0.1768 | 0.0399  |   |
|      | 0.0366 | -0.0003 | 1 .                         |        |        |        |         |   |
| 5458 | NE2    | NE2     | . GLN GLN GLN B B 280 280 . | 0.1355 | 0.1801 | 0.2233 | 0.0325  | - |
|      | 0.0436 | -0.0316 | 1 .                         |        |        |        |         |   |
| 5459 | C      | C       | . GLN GLN GLN B B 280 280 . | 0.0795 | 0.0524 | 0.0705 | 0.0030  |   |
|      | 0.0106 | -0.0061 | 1 .                         |        |        |        |         |   |
| 5460 | O      | O       | . GLN GLN GLN B B 280 280 . | 0.0799 | 0.0637 | 0.0867 | 0.0086  |   |
|      | 0.0196 | -0.0336 | 1 .                         |        |        |        |         |   |
| 5461 | N      | N       | . ASP ASP ASP B B 281 281 . | 0.1099 | 0.0808 | 0.0502 | 0.0069  |   |
|      | 0.0009 | -0.0004 | 1 .                         |        |        |        |         |   |
| 5462 | CA     | CA      | . ASP ASP ASP B B 281 281 . | 0.1026 | 0.0952 | 0.0987 | -0.0016 |   |
|      | 0.0052 | -0.0062 | 1 .                         |        |        |        |         |   |
| 5463 | CB     | CB      | . ASP ASP ASP B B 281 281 . | 0.1153 | 0.1145 | 0.1328 | -0.0146 |   |
|      | 0.0105 | 0.0059  | 1 .                         |        |        |        |         |   |
| 5464 | CG     | CG      | . ASP ASP ASP B B 281 281 . | 0.1739 | 0.1833 | 0.1557 | -0.0285 |   |
|      | 0.0037 | 0.0272  | 1 .                         |        |        |        |         |   |
| 5465 | OD1    | OD1     | . ASP ASP ASP B B 281 281 . | 0.2945 | 0.2256 | 0.1448 | -0.0569 |   |
|      | 0.0263 | 0.1427  | 1 .                         |        |        |        |         |   |
| 5466 | OD2    | OD2     | . ASP ASP ASP B B 281 281 . | 0.1544 | 0.2313 | 0.3263 | -0.0711 |   |
|      | 0.0315 | 0.0132  | 1 .                         |        |        |        |         |   |
| 5467 | C      | C       | . ASP ASP ASP B B 281 281 . | 0.0923 | 0.1002 | 0.0919 | -0.0052 | - |
|      | 0.0015 | -0.0081 | 1 .                         |        |        |        |         |   |
| 5468 | O      | O       | . ASP ASP ASP B B 281 281 . | 0.1163 | 0.0883 | 0.0880 | 0.0176  | - |
|      | 0.0105 | -0.0044 | 1 .                         |        |        |        |         |   |
| 5469 | N      | N       | . PHE PHE PHE B B 282 282 . | 0.0787 | 0.0695 | 0.0658 | 0.0012  |   |
|      | 0.0075 | -0.0186 | 1 .                         |        |        |        |         |   |
| 5470 | CA     | CA      | . PHE PHE PHE B B 282 282 . | 0.0825 | 0.0645 | 0.0824 | -0.0072 |   |
|      | 0.0058 | -0.0098 | 1 .                         |        |        |        |         |   |
| 5471 | CB     | CB      | . PHE PHE PHE B B 282 282 . | 0.0886 | 0.0740 | 0.0609 | -0.0174 |   |
|      | 0.0077 | -0.0162 | 1 .                         |        |        |        |         |   |































|      |        |         |                             |        |        |        |         |   |
|------|--------|---------|-----------------------------|--------|--------|--------|---------|---|
| 5823 | CB     | CB      | . ARG ARG ARG B B 326 326 . | 0.0539 | 0.0649 | 0.0690 | -0.0050 | - |
|      | 0.0178 | -0.0323 | 1 .                         |        |        |        |         |   |
| 5824 | CG     | CG      | . ARG ARG ARG B B 326 326 . | 0.0489 | 0.0748 | 0.0854 | -0.0010 |   |
|      | 0.0112 | -0.0475 | 1 .                         |        |        |        |         |   |
| 5825 | CD     | CD      | . ARG ARG ARG B B 326 326 . | 0.0655 | 0.0676 | 0.1286 | -0.0202 |   |
|      | 0.0570 | -0.0017 | 1 .                         |        |        |        |         |   |
| 5826 | NE     | NE      | . ARG ARG ARG B B 326 326 . | 0.0528 | 0.0645 | 0.1121 | 0.0219  |   |
|      | 0.0142 | -0.0133 | 1 .                         |        |        |        |         |   |
| 5827 | CZ     | CZ      | . ARG ARG ARG B B 326 326 . | 0.0801 | 0.0505 | 0.0536 | 0.0149  |   |
|      | 0.0137 | 0.0266  | 1 .                         |        |        |        |         |   |
| 5828 | NH1    | NH1     | . ARG ARG ARG B B 326 326 . | 0.0479 | 0.0465 | 0.0696 | 0.0188  |   |
|      | 0.0016 | -0.0140 | 1 .                         |        |        |        |         |   |
| 5829 | NH2    | NH2     | . ARG ARG ARG B B 326 326 . | 0.0310 | 0.0369 | 0.0316 | 0.0082  |   |
|      | 0.0060 | 0.0085  | 1 .                         |        |        |        |         |   |
| 5830 | C      | C       | . ARG ARG ARG B B 326 326 . | 0.0690 | 0.0507 | 0.0555 | -0.0095 | - |
|      | 0.0091 | 0.0031  | 1 .                         |        |        |        |         |   |
| 5831 | O      | O       | . ARG ARG ARG B B 326 326 . | 0.0760 | 0.0583 | 0.0312 | -0.0095 |   |
|      | 0.0000 | 0.0135  | 1 .                         |        |        |        |         |   |
| 5832 | N      | N       | . ILE ILE ILE B B 327 327 . | 0.0712 | 0.0256 | 0.0521 | -0.0010 | - |
|      | 0.0188 | 0.0017  | 1 .                         |        |        |        |         |   |
| 5833 | CA     | CA      | . ILE ILE ILE B B 327 327 . | 0.0500 | 0.0328 | 0.0271 | -0.0039 | - |
|      | 0.0066 | 0.0008  | 1 .                         |        |        |        |         |   |
| 5834 | CB     | CB      | . ILE ILE ILE B B 327 327 . | 0.0645 | 0.0451 | 0.0394 | -0.0087 | - |
|      | 0.0225 | 0.0049  | 1 .                         |        |        |        |         |   |
| 5835 | CG1    | CG1     | . ILE ILE ILE B B 327 327 . | 0.0399 | 0.0259 | 0.0253 | 0.0031  |   |
|      | 0.0004 | 0.0000  | 1 .                         |        |        |        |         |   |
| 5836 | CD1    | CD1     | . ILE ILE ILE B B 327 327 . | 0.0932 | 0.0380 | 0.0536 | -0.0170 |   |
|      | 0.0172 | 0.0099  | 1 .                         |        |        |        |         |   |
| 5837 | CG2    | CG2     | . ILE ILE ILE B B 327 327 . | 0.0859 | 0.0340 | 0.0573 | 0.0084  |   |
|      | 0.0083 | -0.0137 | 1 .                         |        |        |        |         |   |
| 5838 | C      | C       | . ILE ILE ILE B B 327 327 . | 0.0562 | 0.0735 | 0.0359 | 0.0111  | - |
|      | 0.0154 | 0.0006  | 1 .                         |        |        |        |         |   |
| 5839 | O      | O       | . ILE ILE ILE B B 327 327 . | 0.0393 | 0.0292 | 0.0258 | 0.0073  | - |
|      | 0.0026 | -0.0013 | 1 .                         |        |        |        |         |   |
| 5840 | N      | N       | . GLU GLU GLU B B 328 328 . | 0.0724 | 0.0614 | 0.0493 | 0.0011  | - |
|      | 0.0170 | 0.0094  | 1 .                         |        |        |        |         |   |
| 5841 | CA     | CA      | . GLU GLU GLU B B 328 328 . | 0.0715 | 0.0819 | 0.0642 | 0.0103  | - |
|      | 0.0005 | 0.0019  | 1 .                         |        |        |        |         |   |
| 5842 | CB     | CB      | . GLU GLU GLU B B 328 328 . | 0.0710 | 0.0672 | 0.1096 | 0.0332  | - |
|      | 0.0056 | 0.0190  | 1 .                         |        |        |        |         |   |
| 5843 | CG     | CG      | . GLU GLU GLU B B 328 328 . | 0.1466 | 0.1590 | 0.1508 | -0.0001 |   |
|      | 0.0078 | 0.0327  | 1 .                         |        |        |        |         |   |
| 5844 | CD     | CD      | . GLU GLU GLU B B 328 328 . | 0.2621 | 0.2540 | 0.2477 | -0.0339 |   |
|      | 0.0277 | -0.0280 | 1 .                         |        |        |        |         |   |
| 5845 | OE1    | OE1     | . GLU GLU GLU B B 328 328 . | 0.3330 | 0.3388 | 0.2081 | -0.0333 |   |
|      | 0.0230 | -0.0413 | 1 .                         |        |        |        |         |   |
| 5846 | OE2    | OE2     | . GLU GLU GLU B B 328 328 . | 0.2622 | 0.2812 | 0.2797 | -0.0217 |   |
|      | 0.0385 | -0.0026 | 1 .                         |        |        |        |         |   |
| 5847 | C      | C       | . GLU GLU GLU B B 328 328 . | 0.0456 | 0.0815 | 0.0745 | 0.0105  | - |
|      | 0.0065 | 0.0010  | 1 .                         |        |        |        |         |   |
| 5848 | O      | O       | . GLU GLU GLU B B 328 328 . | 0.0581 | 0.0668 | 0.0464 | -0.0028 |   |
|      | 0.0226 | -0.0170 | 1 .                         |        |        |        |         |   |
| 5849 | N      | N       | . ARG ARG ARG B B 329 329 . | 0.0400 | 0.0702 | 0.0491 | 0.0208  | - |
|      | 0.0068 | -0.0077 | 1 .                         |        |        |        |         |   |













|      |        |         |                             |        |        |        |         |   |
|------|--------|---------|-----------------------------|--------|--------|--------|---------|---|
| 5985 | CD1    | CD1     | . ILE ILE ILE B B 346 346 . | 0.0936 | 0.0516 | 0.0934 | -0.0157 | - |
|      | 0.0324 | -0.0021 | 1 .                         |        |        |        |         |   |
| 5986 | CG2    | CG2     | . ILE ILE ILE B B 346 346 . | 0.0528 | 0.0353 | 0.0532 | 0.0144  | - |
|      | 0.0129 | -0.0140 | 1 .                         |        |        |        |         |   |
| 5987 | C      | C       | . ILE ILE ILE B B 346 346 . | 0.0709 | 0.0417 | 0.0518 | 0.0267  |   |
|      | 0.0121 | 0.0048  | 1 .                         |        |        |        |         |   |
| 5988 | O      | O       | . ILE ILE ILE B B 346 346 . | 0.0667 | 0.0516 | 0.0600 | 0.0321  |   |
|      | 0.0062 | -0.0021 | 1 .                         |        |        |        |         |   |
| 5989 | N      | N       | . GLY GLY GLY B B 347 347 . | 0.0841 | 0.0435 | 0.0479 | 0.0034  |   |
|      | 0.0224 | 0.0099  | 1 .                         |        |        |        |         |   |
| 5990 | CA     | CA      | . GLY GLY GLY B B 347 347 . | 0.0448 | 0.0343 | 0.0406 | 0.0124  |   |
|      | 0.0097 | 0.0095  | 1 .                         |        |        |        |         |   |
| 5991 | C      | C       | . GLY GLY GLY B B 347 347 . | 0.0407 | 0.0338 | 0.0260 | 0.0055  | - |
|      | 0.0031 | -0.0018 | 1 .                         |        |        |        |         |   |
| 5992 | O      | O       | . GLY GLY GLY B B 347 347 . | 0.0814 | 0.0797 | 0.0562 | 0.0007  |   |
|      | 0.0229 | -0.0039 | 1 .                         |        |        |        |         |   |
| 5993 | N      | N       | . SER SER SER B B 348 348 . | 0.0590 | 0.0259 | 0.0291 | -0.0044 | - |
|      | 0.0113 | 0.0015  | 1 .                         |        |        |        |         |   |
| 5994 | CA     | CA      | . SER SER SER B B 348 348 . | 0.0429 | 0.0322 | 0.0370 | 0.0104  | - |
|      | 0.0106 | -0.0044 | 1 .                         |        |        |        |         |   |
| 5995 | CB     | CB      | . SER SER SER B B 348 348 . | 0.0565 | 0.0456 | 0.0433 | 0.0142  | - |
|      | 0.0074 | 0.0115  | 1 .                         |        |        |        |         |   |
| 5996 | OG     | OG      | . SER SER SER B B 348 348 . | 0.0680 | 0.0351 | 0.0607 | 0.0187  |   |
|      | 0.0091 | 0.0074  | 1 .                         |        |        |        |         |   |
| 5997 | C      | C       | . SER SER SER B B 348 348 . | 0.0517 | 0.0546 | 0.0309 | 0.0075  | - |
|      | 0.0119 | -0.0014 | 1 .                         |        |        |        |         |   |
| 5998 | O      | O       | . SER SER SER B B 348 348 . | 0.0450 | 0.0524 | 0.0354 | 0.0188  | - |
|      | 0.0095 | -0.0020 | 1 .                         |        |        |        |         |   |
| 5999 | N      | N       | . VAL VAL VAL B B 349 349 . | 0.0841 | 0.0644 | 0.0261 | -0.0062 | - |
|      | 0.0013 | 0.0056  | 1 .                         |        |        |        |         |   |
| 6000 | CA     | CA      | . VAL VAL VAL B B 349 349 . | 0.0803 | 0.0563 | 0.0450 | -0.0086 |   |
|      | 0.0030 | 0.0178  | 1 .                         |        |        |        |         |   |
| 6001 | CB     | CB      | . VAL VAL VAL B B 349 349 . | 0.0638 | 0.0357 | 0.0407 | 0.0034  |   |
|      | 0.0115 | 0.0120  | 1 .                         |        |        |        |         |   |
| 6002 | CG1    | CG1     | . VAL VAL VAL B B 349 349 . | 0.0896 | 0.0507 | 0.0907 | -0.0250 | - |
|      | 0.0127 | 0.0363  | 1 .                         |        |        |        |         |   |
| 6003 | CG2    | CG2     | . VAL VAL VAL B B 349 349 . | 0.1003 | 0.0839 | 0.0525 | -0.0099 | - |
|      | 0.0053 | 0.0228  | 1 .                         |        |        |        |         |   |
| 6004 | C      | C       | . VAL VAL VAL B B 349 349 . | 0.0643 | 0.0571 | 0.0386 | 0.0193  |   |
|      | 0.0028 | 0.0025  | 1 .                         |        |        |        |         |   |
| 6005 | O      | O       | . VAL VAL VAL B B 349 349 . | 0.0751 | 0.0693 | 0.0386 | 0.0010  |   |
|      | 0.0062 | 0.0236  | 1 .                         |        |        |        |         |   |
| 6006 | N      | N       | . THR THR THR B B 350 350 . | 0.0588 | 0.0763 | 0.0302 | -0.0072 |   |
|      | 0.0007 | 0.0078  | 1 .                         |        |        |        |         |   |
| 6007 | CA     | CA      | . THR THR THR B B 350 350 . | 0.0650 | 0.0827 | 0.0702 | 0.0073  | - |
|      | 0.0014 | 0.0148  | 1 .                         |        |        |        |         |   |
| 6008 | CB     | CB      | . THR THR THR B B 350 350 . | 0.0658 | 0.0865 | 0.0463 | -0.0094 |   |
|      | 0.0150 | 0.0073  | 1 .                         |        |        |        |         |   |
| 6009 | OG1    | OG1     | . THR THR THR B B 350 350 . | 0.0919 | 0.0470 | 0.0823 | 0.0299  | - |
|      | 0.0053 | -0.0143 | 1 .                         |        |        |        |         |   |
| 6010 | CG2    | CG2     | . THR THR THR B B 350 350 . | 0.0255 | 0.1625 | 0.1305 | -0.0056 |   |
|      | 0.0016 | 0.0042  | 1 .                         |        |        |        |         |   |
| 6011 | C      | C       | . THR THR THR B B 350 350 . | 0.0588 | 0.0747 | 0.0600 | 0.0049  | - |
|      | 0.0120 | 0.0058  | 1 .                         |        |        |        |         |   |



















|        |         |     |                             |        |        |        |         |   |
|--------|---------|-----|-----------------------------|--------|--------|--------|---------|---|
| 6228   | CD1     | CD1 | . PHE PHE PHE B B 379 379 . | 0.0545 | 0.0439 | 0.0498 | 0.0231  |   |
| 0.0018 | 0.0038  | 1 . |                             |        |        |        |         |   |
| 6229   | CE1     | CE1 | . PHE PHE PHE B B 379 379 . | 0.0424 | 0.0367 | 0.0508 | 0.0125  | - |
| 0.0052 | -0.0111 | 1 . |                             |        |        |        |         |   |
| 6230   | CZ      | CZ  | . PHE PHE PHE B B 379 379 . | 0.0762 | 0.0303 | 0.0549 | -0.0045 |   |
| 0.0150 | -0.0120 | 1 . |                             |        |        |        |         |   |
| 6231   | CE2     | CE2 | . PHE PHE PHE B B 379 379 . | 0.0829 | 0.0312 | 0.0872 | -0.0152 |   |
| 0.0001 | -0.0106 | 1 . |                             |        |        |        |         |   |
| 6232   | CD2     | CD2 | . PHE PHE PHE B B 379 379 . | 0.0737 | 0.0757 | 0.0657 | 0.0384  | - |
| 0.0106 | 0.0190  | 1 . |                             |        |        |        |         |   |
| 6233   | C       | C   | . PHE PHE PHE B B 379 379 . | 0.0284 | 0.0258 | 0.0335 | 0.0012  | - |
| 0.0050 | -0.0020 | 1 . |                             |        |        |        |         |   |
| 6234   | O       | O   | . PHE PHE PHE B B 379 379 . | 0.0368 | 0.0468 | 0.0317 | 0.0015  |   |
| 0.0059 | 0.0092  | 1 . |                             |        |        |        |         |   |
| 6235   | N       | N   | . ILE ILE ILE B B 380 380 . | 0.0271 | 0.0302 | 0.0289 | 0.0030  |   |
| 0.0025 | 0.0042  | 1 . |                             |        |        |        |         |   |
| 6236   | CA      | CA  | . ILE ILE ILE B B 380 380 . | 0.0446 | 0.0375 | 0.0260 | 0.0153  | - |
| 0.0037 | -0.0029 | 1 . |                             |        |        |        |         |   |
| 6237   | CB      | CB  | . ILE ILE ILE B B 380 380 . | 0.0315 | 0.0314 | 0.0254 | 0.0061  | - |
| 0.0009 | -0.0009 | 1 . |                             |        |        |        |         |   |
| 6238   | CG1     | CG1 | . ILE ILE ILE B B 380 380 . | 0.0274 | 0.0432 | 0.0270 | 0.0061  | - |
| 0.0019 | -0.0056 | 1 . |                             |        |        |        |         |   |
| 6239   | CD1     | CD1 | . ILE ILE ILE B B 380 380 . | 0.0354 | 0.0254 | 0.0283 | -0.0011 |   |
| 0.0055 | -0.0006 | 1 . |                             |        |        |        |         |   |
| 6240   | CG2     | CG2 | . ILE ILE ILE B B 380 380 . | 0.0752 | 0.0541 | 0.0515 | 0.0187  | - |
| 0.0171 | 0.0145  | 1 . |                             |        |        |        |         |   |
| 6241   | C       | C   | . ILE ILE ILE B B 380 380 . | 0.0628 | 0.0283 | 0.0558 | 0.0105  |   |
| 0.0004 | 0.0008  | 1 . |                             |        |        |        |         |   |
| 6242   | O       | O   | . ILE ILE ILE B B 380 380 . | 0.0507 | 0.0471 | 0.0275 | 0.0234  |   |
| 0.0008 | 0.0013  | 1 . |                             |        |        |        |         |   |
| 6243   | N       | N   | . ALA ALA ALA B B 381 381 . | 0.0362 | 0.0293 | 0.0286 | 0.0065  |   |
| 0.0023 | 0.0009  | 1 . |                             |        |        |        |         |   |
| 6244   | CA      | CA  | . ALA ALA ALA B B 381 381 . | 0.0466 | 0.0337 | 0.0288 | 0.0111  |   |
| 0.0024 | -0.0016 | 1 . |                             |        |        |        |         |   |
| 6245   | CB      | CB  | . ALA ALA ALA B B 381 381 . | 0.0295 | 0.0289 | 0.0253 | 0.0038  | - |
| 0.0004 | -0.0004 | 1 . |                             |        |        |        |         |   |
| 6246   | C       | C   | . ALA ALA ALA B B 381 381 . | 0.0259 | 0.0253 | 0.0255 | -0.0001 |   |
| 0.0003 | 0.0000  | 1 . |                             |        |        |        |         |   |
| 6247   | O       | O   | . ALA ALA ALA B B 381 381 . | 0.0991 | 0.0302 | 0.0721 | 0.0148  |   |
| 0.0163 | 0.0123  | 1 . |                             |        |        |        |         |   |
| 6248   | N       | N   | . ASP ASP ASP B B 382 382 . | 0.0706 | 0.0309 | 0.0343 | 0.0088  | - |
| 0.0052 | 0.0047  | 1 . |                             |        |        |        |         |   |
| 6249   | CA      | CA  | . ASP ASP ASP B B 382 382 . | 0.0457 | 0.0300 | 0.0292 | 0.0095  |   |
| 0.0044 | 0.0029  | 1 . |                             |        |        |        |         |   |
| 6250   | CB      | CB  | . ASP ASP ASP B B 382 382 . | 0.0564 | 0.0529 | 0.0578 | 0.0040  |   |
| 0.0113 | 0.0292  | 1 . |                             |        |        |        |         |   |
| 6251   | CG      | CG  | . ASP ASP ASP B B 382 382 . | 0.0470 | 0.0412 | 0.0854 | -0.0129 |   |
| 0.0031 | 0.0202  | 1 . |                             |        |        |        |         |   |
| 6252   | OD1     | OD1 | . ASP ASP ASP B B 382 382 . | 0.1140 | 0.0806 | 0.0498 | 0.0343  | - |
| 0.0405 | 0.0001  | 1 . |                             |        |        |        |         |   |
| 6253   | OD2     | OD2 | . ASP ASP ASP B B 382 382 . | 0.0829 | 0.0486 | 0.0863 | 0.0151  | - |
| 0.0022 | 0.0037  | 1 . |                             |        |        |        |         |   |
| 6254   | C       | C   | . ASP ASP ASP B B 382 382 . | 0.0672 | 0.0309 | 0.0281 | -0.0007 | - |
| 0.0062 | 0.0033  | 1 . |                             |        |        |        |         |   |



|      |        |         |                             |        |        |        |         |   |
|------|--------|---------|-----------------------------|--------|--------|--------|---------|---|
| 6282 | N      | N       | . LEU LEU LEU B B 387 387 . | 0.0970 | 0.0512 | 0.0570 | 0.0118  | - |
|      | 0.0045 | 0.0037  | 1 .                         |        |        |        |         |   |
| 6283 | CA     | CA      | . LEU LEU LEU B B 387 387 . | 0.0912 | 0.0404 | 0.0613 | 0.0135  | - |
|      | 0.0036 | 0.0147  | 1 .                         |        |        |        |         |   |
| 6284 | CB     | CB      | . LEU LEU LEU B B 387 387 . | 0.0596 | 0.0548 | 0.0742 | 0.0314  | - |
|      | 0.0085 | -0.0022 | 1 .                         |        |        |        |         |   |
| 6285 | CG     | CG      | . LEU LEU LEU B B 387 387 . | 0.0775 | 0.1048 | 0.0452 | -0.0226 | - |
|      | 0.0192 | -0.0214 | 1 .                         |        |        |        |         |   |
| 6286 | CD1    | CD1     | . LEU LEU LEU B B 387 387 . | 0.0982 | 0.0406 | 0.0737 | 0.0092  | - |
|      | 0.0091 | -0.0031 | 1 .                         |        |        |        |         |   |
| 6287 | CD2    | CD2     | . LEU LEU LEU B B 387 387 . | 0.0662 | 0.0982 | 0.0630 | 0.0484  |   |
|      | 0.0157 | -0.0036 | 1 .                         |        |        |        |         |   |
| 6288 | C      | C       | . LEU LEU LEU B B 387 387 . | 0.0986 | 0.0552 | 0.0619 | 0.0180  | - |
|      | 0.0099 | 0.0123  | 1 .                         |        |        |        |         |   |
| 6289 | O      | O       | . LEU LEU LEU B B 387 387 . | 0.1325 | 0.0855 | 0.0682 | 0.0286  | - |
|      | 0.0114 | -0.0003 | 1 .                         |        |        |        |         |   |
| 6290 | N      | N       | . CYS CYS CYS B B 388 388 . | 0.1019 | 0.0742 | 0.0593 | 0.0137  | - |
|      | 0.0099 | 0.0123  | 1 .                         |        |        |        |         |   |
| 6291 | CA     | CA      | . CYS CYS CYS B B 388 388 . | 0.1335 | 0.0978 | 0.0893 | 0.0010  | - |
|      | 0.0019 | 0.0101  | 1 .                         |        |        |        |         |   |
| 6292 | CB     | CB      | . CYS CYS CYS B B 388 388 . | 0.1328 | 0.0806 | 0.0800 | 0.0059  | - |
|      | 0.0114 | -0.0037 | 1 .                         |        |        |        |         |   |
| 6293 | SG     | SG      | . CYS CYS CYS B B 388 388 . | 0.3006 | 0.2336 | 0.1545 | -0.0161 | - |
|      | 0.0393 | 0.0105  | 1 .                         |        |        |        |         |   |
| 6294 | C      | C       | . CYS CYS CYS B B 388 388 . | 0.1303 | 0.0939 | 0.0968 | -0.0032 | - |
|      | 0.0017 | 0.0031  | 1 .                         |        |        |        |         |   |
| 6295 | O      | O       | . CYS CYS CYS B B 388 388 . | 0.1808 | 0.1310 | 0.0974 | 0.0020  | - |
|      | 0.0018 | 0.0119  | 1 .                         |        |        |        |         |   |
| 6296 | N      | N       | . THR THR THR B B 389 389 . | 0.0889 | 0.0595 | 0.0595 | -0.0055 | - |
|      | 0.0018 | 0.0057  | 1 .                         |        |        |        |         |   |
| 6297 | CA     | CA      | . THR THR THR B B 389 389 . | 0.0582 | 0.0491 | 0.0581 | -0.0006 | - |
|      | 0.0019 | 0.0208  | 1 .                         |        |        |        |         |   |
| 6298 | CB     | CB      | . THR THR THR B B 389 389 . | 0.0485 | 0.0664 | 0.0312 | -0.0087 | - |
|      | 0.0090 | -0.0023 | 1 .                         |        |        |        |         |   |
| 6299 | OG1    | OG1     | . THR THR THR B B 389 389 . | 0.0433 | 0.0519 | 0.0378 | 0.0128  |   |
|      | 0.0018 | 0.0159  | 1 .                         |        |        |        |         |   |
| 6300 | CG2    | CG2     | . THR THR THR B B 389 389 . | 0.0359 | 0.0559 | 0.0420 | 0.0033  |   |
|      | 0.0047 | 0.0222  | 1 .                         |        |        |        |         |   |
| 6301 | C      | C       | . THR THR THR B B 389 389 . | 0.0721 | 0.0692 | 0.0380 | 0.0001  |   |
|      | 0.0014 | 0.0033  | 1 .                         |        |        |        |         |   |
| 6302 | O      | O       | . THR THR THR B B 389 389 . | 0.0891 | 0.0613 | 0.0636 | -0.0246 |   |
|      | 0.0028 | 0.0178  | 1 .                         |        |        |        |         |   |
| 6303 | N      | N       | . GLY GLY GLY B B 390 390 . | 0.0366 | 0.0262 | 0.0277 | -0.0032 | - |
|      | 0.0052 | 0.0015  | 1 .                         |        |        |        |         |   |
| 6304 | CA     | CA      | . GLY GLY GLY B B 390 390 . | 0.0538 | 0.0262 | 0.0438 | -0.0040 | - |
|      | 0.0110 | -0.0005 | 1 .                         |        |        |        |         |   |
| 6305 | C      | C       | . GLY GLY GLY B B 390 390 . | 0.0318 | 0.0369 | 0.0265 | 0.0087  |   |
|      | 0.0028 | 0.0038  | 1 .                         |        |        |        |         |   |
| 6306 | O      | O       | . GLY GLY GLY B B 390 390 . | 0.0455 | 0.0295 | 0.0257 | -0.0081 | - |
|      | 0.0014 | 0.0011  | 1 .                         |        |        |        |         |   |
| 6307 | N      | N       | . GLN GLN GLN B B 391 391 . | 0.0388 | 0.0286 | 0.0295 | -0.0066 | - |
|      | 0.0074 | 0.0036  | 1 .                         |        |        |        |         |   |
| 6308 | CA     | CA      | . GLN GLN GLN B B 391 391 . | 0.0353 | 0.0528 | 0.0298 | -0.0045 |   |
|      | 0.0028 | 0.0084  | 1 .                         |        |        |        |         |   |







|      |        |         |                             |        |        |        |         |   |
|------|--------|---------|-----------------------------|--------|--------|--------|---------|---|
| 6390 | CB     | CB      | . ARG ARG ARG B B 402 402 . | 0.0405 | 0.0317 | 0.0301 | -0.0053 | - |
|      | 0.0040 | -0.0026 | 1 .                         |        |        |        |         |   |
| 6391 | CG     | CG      | . ARG ARG ARG B B 402 402 . | 0.0488 | 0.0254 | 0.0260 | -0.0016 | - |
|      | 0.0041 | 0.0002  | 1 .                         |        |        |        |         |   |
| 6392 | CD     | CD      | . ARG ARG ARG B B 402 402 . | 0.0256 | 0.0274 | 0.0273 | 0.0008  | - |
|      | 0.0007 | -0.0020 | 1 .                         |        |        |        |         |   |
| 6393 | NE     | NE      | . ARG ARG ARG B B 402 402 . | 0.0253 | 0.0253 | 0.0253 | 0.0000  |   |
|      | 0.0000 | 0.0000  | 1 .                         |        |        |        |         |   |
| 6394 | CZ     | CZ      | . ARG ARG ARG B B 402 402 . | 0.0253 | 0.0253 | 0.0253 | 0.0000  |   |
|      | 0.0000 | 0.0000  | 1 .                         |        |        |        |         |   |
| 6395 | NH1    | NH1     | . ARG ARG ARG B B 402 402 . | 0.0333 | 0.0484 | 0.0358 | -0.0136 |   |
|      | 0.0091 | -0.0155 | 1 .                         |        |        |        |         |   |
| 6396 | NH2    | NH2     | . ARG ARG ARG B B 402 402 . | 0.0350 | 0.0253 | 0.0280 | 0.0000  | - |
|      | 0.0051 | 0.0000  | 1 .                         |        |        |        |         |   |
| 6397 | C      | C       | . ARG ARG ARG B B 402 402 . | 0.0253 | 0.0253 | 0.0259 | 0.0000  |   |
|      | 0.0000 | 0.0001  | 1 .                         |        |        |        |         |   |
| 6398 | O      | O       | . ARG ARG ARG B B 402 402 . | 0.0253 | 0.0253 | 0.0253 | 0.0000  |   |
|      | 0.0000 | 0.0000  | 1 .                         |        |        |        |         |   |
| 6399 | N      | N       | . LEU LEU LEU B B 403 403 . | 0.0384 | 0.0309 | 0.0273 | 0.0085  |   |
|      | 0.0051 | 0.0033  | 1 .                         |        |        |        |         |   |
| 6400 | CA     | CA      | . LEU LEU LEU B B 403 403 . | 0.0257 | 0.0257 | 0.0255 | -0.0004 |   |
|      | 0.0003 | -0.0003 | 1 .                         |        |        |        |         |   |
| 6401 | CB     | CB      | . LEU LEU LEU B B 403 403 . | 0.0253 | 0.0253 | 0.0253 | 0.0000  |   |
|      | 0.0000 | 0.0000  | 1 .                         |        |        |        |         |   |
| 6402 | CG     | CG      | . LEU LEU LEU B B 403 403 . | 0.0304 | 0.0323 | 0.0295 | -0.0060 | - |
|      | 0.0046 | 0.0054  | 1 .                         |        |        |        |         |   |
| 6403 | CD1    | CD1     | . LEU LEU LEU B B 403 403 . | 0.0253 | 0.0253 | 0.0253 | 0.0000  |   |
|      | 0.0000 | 0.0000  | 1 .                         |        |        |        |         |   |
| 6404 | CD2    | CD2     | . LEU LEU LEU B B 403 403 . | 0.0323 | 0.0254 | 0.0348 | -0.0007 | - |
|      | 0.0081 | 0.0009  | 1 .                         |        |        |        |         |   |
| 6405 | C      | C       | . LEU LEU LEU B B 403 403 . | 0.0253 | 0.0284 | 0.0262 | 0.0000  |   |
|      | 0.0000 | -0.0017 | 1 .                         |        |        |        |         |   |
| 6406 | O      | O       | . LEU LEU LEU B B 403 403 . | 0.0254 | 0.0253 | 0.0253 | 0.0000  |   |
|      | 0.0000 | 0.0000  | 1 .                         |        |        |        |         |   |
| 6407 | N      | N       | . ALA ALA ALA B B 404 404 . | 0.0253 | 0.0253 | 0.0253 | 0.0000  |   |
|      | 0.0000 | 0.0000  | 1 .                         |        |        |        |         |   |
| 6408 | CA     | CA      | . ALA ALA ALA B B 404 404 . | 0.0256 | 0.0315 | 0.0256 | -0.0013 |   |
|      | 0.0002 | -0.0013 | 1 .                         |        |        |        |         |   |
| 6409 | CB     | CB      | . ALA ALA ALA B B 404 404 . | 0.0253 | 0.0517 | 0.0354 | 0.0012  | - |
|      | 0.0007 | -0.0163 | 1 .                         |        |        |        |         |   |
| 6410 | C      | C       | . ALA ALA ALA B B 404 404 . | 0.0268 | 0.0354 | 0.0520 | 0.0037  | - |
|      | 0.0046 | -0.0142 | 1 .                         |        |        |        |         |   |
| 6411 | O      | O       | . ALA ALA ALA B B 404 404 . | 0.0280 | 0.0309 | 0.0253 | -0.0038 |   |
|      | 0.0000 | 0.0000  | 1 .                         |        |        |        |         |   |
| 6412 | N      | N       | . LYS LYS LYS B B 405 405 . | 0.0253 | 0.0253 | 0.0253 | 0.0000  |   |
|      | 0.0000 | 0.0000  | 1 .                         |        |        |        |         |   |
| 6413 | CA     | CA      | . LYS LYS LYS B B 405 405 . | 0.0253 | 0.0253 | 0.0253 | 0.0000  |   |
|      | 0.0000 | 0.0000  | 1 .                         |        |        |        |         |   |
| 6414 | CB     | CB      | . LYS LYS LYS B B 405 405 . | 0.0294 | 0.0290 | 0.0294 | 0.0039  |   |
|      | 0.0040 | 0.0039  | 1 .                         |        |        |        |         |   |
| 6415 | CG     | CG      | . LYS LYS LYS B B 405 405 . | 0.0262 | 0.0262 | 0.0350 | 0.0009  | - |
|      | 0.0029 | -0.0029 | 1 .                         |        |        |        |         |   |
| 6416 | CD     | CD      | . LYS LYS LYS B B 405 405 . | 0.0341 | 0.0262 | 0.0258 | -0.0028 | - |
|      | 0.0022 | 0.0007  | 1 .                         |        |        |        |         |   |













|        |         |     |                             |        |        |        |         |   |
|--------|---------|-----|-----------------------------|--------|--------|--------|---------|---|
| 6552   | CZ      | CZ  | . ARG ARG ARG B B 421 421 . | 0.4536 | 0.4226 | 0.4500 | 0.0242  |   |
| 0.0153 | -0.0174 | 1 . |                             |        |        |        |         |   |
| 6553   | NH1     | NH1 | . ARG ARG ARG B B 421 421 . | 0.4636 | 0.4512 | 0.4764 | 0.0293  |   |
| 0.0285 | -0.0247 | 1 . |                             |        |        |        |         |   |
| 6554   | NH2     | NH2 | . ARG ARG ARG B B 421 421 . | 0.4297 | 0.4067 | 0.4527 | 0.0277  |   |
| 0.0292 | -0.0271 | 1 . |                             |        |        |        |         |   |
| 6555   | C       | C   | . ARG ARG ARG B B 421 421 . | 0.1907 | 0.1718 | 0.2064 | -0.0018 |   |
| 0.0023 | -0.0089 | 1 . |                             |        |        |        |         |   |
| 6556   | O       | O   | . ARG ARG ARG B B 421 421 . | 0.2127 | 0.1969 | 0.2279 | -0.0116 | - |
| 0.0046 | -0.0281 | 1 . |                             |        |        |        |         |   |
| 6557   | N       | N   | . PHE PHE PHE B B 422 422 . | 0.1686 | 0.1277 | 0.1606 | -0.0133 | - |
| 0.0114 | -0.0019 | 1 . |                             |        |        |        |         |   |
| 6558   | CA      | CA  | . PHE PHE PHE B B 422 422 . | 0.1264 | 0.0810 | 0.1056 | 0.0051  | - |
| 0.0121 | -0.0125 | 1 . |                             |        |        |        |         |   |
| 6559   | CB      | CB  | . PHE PHE PHE B B 422 422 . | 0.1067 | 0.1008 | 0.1010 | 0.0059  | - |
| 0.0246 | -0.0066 | 1 . |                             |        |        |        |         |   |
| 6560   | CG      | CG  | . PHE PHE PHE B B 422 422 . | 0.1201 | 0.0650 | 0.0700 | 0.0002  | - |
| 0.0027 | -0.0175 | 1 . |                             |        |        |        |         |   |
| 6561   | CD1     | CD1 | . PHE PHE PHE B B 422 422 . | 0.1033 | 0.0363 | 0.0269 | 0.0253  |   |
| 0.0000 | 0.0021  | 1 . |                             |        |        |        |         |   |
| 6562   | CE1     | CE1 | . PHE PHE PHE B B 422 422 . | 0.0495 | 0.0660 | 0.0270 | 0.0314  |   |
| 0.0063 | 0.0082  | 1 . |                             |        |        |        |         |   |
| 6563   | CZ      | CZ  | . PHE PHE PHE B B 422 422 . | 0.0320 | 0.0631 | 0.0348 | 0.0085  | - |
| 0.0046 | -0.0189 | 1 . |                             |        |        |        |         |   |
| 6564   | CE2     | CE2 | . PHE PHE PHE B B 422 422 . | 0.1286 | 0.0712 | 0.0680 | 0.0096  | - |
| 0.0247 | -0.0289 | 1 . |                             |        |        |        |         |   |
| 6565   | CD2     | CD2 | . PHE PHE PHE B B 422 422 . | 0.0968 | 0.1516 | 0.0694 | 0.0022  | - |
| 0.0201 | -0.0158 | 1 . |                             |        |        |        |         |   |
| 6566   | C       | C   | . PHE PHE PHE B B 422 422 . | 0.1113 | 0.0650 | 0.0762 | 0.0002  | - |
| 0.0013 | -0.0038 | 1 . |                             |        |        |        |         |   |
| 6567   | O       | O   | . PHE PHE PHE B B 422 422 . | 0.1404 | 0.0660 | 0.0981 | 0.0010  |   |
| 0.0000 | -0.0032 | 1 . |                             |        |        |        |         |   |
| 6568   | N       | N   | . ALA ALA ALA B B 423 423 . | 0.1108 | 0.0416 | 0.0659 | -0.0213 |   |
| 0.0057 | 0.0026  | 1 . |                             |        |        |        |         |   |
| 6569   | CA      | CA  | . ALA ALA ALA B B 423 423 . | 0.0989 | 0.0576 | 0.0485 | -0.0092 | - |
| 0.0002 | 0.0080  | 1 . |                             |        |        |        |         |   |
| 6570   | CB      | CB  | . ALA ALA ALA B B 423 423 . | 0.0877 | 0.0484 | 0.0629 | -0.0183 |   |
| 0.0011 | 0.0255  | 1 . |                             |        |        |        |         |   |
| 6571   | C       | C   | . ALA ALA ALA B B 423 423 . | 0.1190 | 0.0289 | 0.0789 | -0.0070 |   |
| 0.0045 | 0.0124  | 1 . |                             |        |        |        |         |   |
| 6572   | O       | O   | . ALA ALA ALA B B 423 423 . | 0.1548 | 0.0561 | 0.0604 | -0.0023 |   |
| 0.0091 | 0.0013  | 1 . |                             |        |        |        |         |   |
| 6573   | N       | N   | . GLY GLY GLY B B 424 424 . | 0.1060 | 0.0530 | 0.0872 | -0.0244 |   |
| 0.0079 | 0.0328  | 1 . |                             |        |        |        |         |   |
| 6574   | CA      | CA  | . GLY GLY GLY B B 424 424 . | 0.1523 | 0.0651 | 0.0896 | 0.0103  |   |
| 0.0167 | 0.0218  | 1 . |                             |        |        |        |         |   |
| 6575   | C       | C   | . GLY GLY GLY B B 424 424 . | 0.1889 | 0.1087 | 0.1046 | -0.0005 |   |
| 0.0284 | 0.0156  | 1 . |                             |        |        |        |         |   |
| 6576   | O       | O   | . GLY GLY GLY B B 424 424 . | 0.2152 | 0.0863 | 0.1010 | -0.0031 |   |
| 0.0324 | -0.0034 | 1 . |                             |        |        |        |         |   |
| 6577   | N       | N   | . HIS HIS HIS B B 425 425 . | 0.1761 | 0.0984 | 0.0941 | 0.0047  |   |
| 0.0238 | -0.0098 | 1 . |                             |        |        |        |         |   |
| 6578   | CA      | CA  | . HIS HIS HIS B B 425 425 . | 0.1851 | 0.1399 | 0.1079 | 0.0111  |   |
| 0.0260 | -0.0119 | 1 . |                             |        |        |        |         |   |



|      |        |         |                             |        |        |        |         |   |
|------|--------|---------|-----------------------------|--------|--------|--------|---------|---|
| 6606 | N      | N       | . ARG ARG ARG B B 428 428 . | 0.0801 | 0.0737 | 0.0701 | 0.0104  | - |
|      | 0.0154 | 0.0104  | 1 .                         |        |        |        |         |   |
| 6607 | CA     | CA      | . ARG ARG ARG B B 428 428 . | 0.1243 | 0.0754 | 0.0877 | -0.0059 | - |
|      | 0.0143 | 0.0121  | 1 .                         |        |        |        |         |   |
| 6608 | CB     | CB      | . ARG ARG ARG B B 428 428 . | 0.0863 | 0.0838 | 0.0909 | 0.0099  |   |
|      | 0.0050 | -0.0002 | 1 .                         |        |        |        |         |   |
| 6609 | CG     | CG      | . ARG ARG ARG B B 428 428 . | 0.1341 | 0.1236 | 0.0847 | -0.0218 |   |
|      | 0.0221 | 0.0201  | 1 .                         |        |        |        |         |   |
| 6610 | CD     | CD      | . ARG ARG ARG B B 428 428 . | 0.1002 | 0.0832 | 0.0636 | -0.0163 |   |
|      | 0.0361 | -0.0038 | 1 .                         |        |        |        |         |   |
| 6611 | NE     | NE      | . ARG ARG ARG B B 428 428 . | 0.1026 | 0.0696 | 0.0316 | -0.0105 |   |
|      | 0.0141 | -0.0146 | 1 .                         |        |        |        |         |   |
| 6612 | CZ     | CZ      | . ARG ARG ARG B B 428 428 . | 0.0858 | 0.0748 | 0.0481 | -0.0302 | - |
|      | 0.0075 | -0.0237 | 1 .                         |        |        |        |         |   |
| 6613 | NH1    | NH1     | . ARG ARG ARG B B 428 428 . | 0.1168 | 0.0867 | 0.0714 | -0.0477 | - |
|      | 0.0062 | -0.0376 | 1 .                         |        |        |        |         |   |
| 6614 | NH2    | NH2     | . ARG ARG ARG B B 428 428 . | 0.1513 | 0.1324 | 0.0816 | -0.0213 |   |
|      | 0.0118 | 0.0161  | 1 .                         |        |        |        |         |   |
| 6615 | C      | C       | . ARG ARG ARG B B 428 428 . | 0.1353 | 0.0928 | 0.1219 | -0.0055 | - |
|      | 0.0188 | -0.0082 | 1 .                         |        |        |        |         |   |
| 6616 | O      | O       | . ARG ARG ARG B B 428 428 . | 0.1969 | 0.1367 | 0.1686 | -0.0052 | - |
|      | 0.0204 | -0.0028 | 1 .                         |        |        |        |         |   |
| 6617 | N      | N       | . ASN ASN ASN B B 429 429 . | 0.1887 | 0.1138 | 0.1450 | -0.0071 | - |
|      | 0.0212 | 0.0157  | 1 .                         |        |        |        |         |   |
| 6618 | CA     | CA      | . ASN ASN ASN B B 429 429 . | 0.1907 | 0.1331 | 0.1527 | -0.0203 | - |
|      | 0.0142 | 0.0130  | 1 .                         |        |        |        |         |   |
| 6619 | CB     | CB      | . ASN ASN ASN B B 429 429 . | 0.2165 | 0.1492 | 0.1621 | -0.0245 | - |
|      | 0.0231 | 0.0327  | 1 .                         |        |        |        |         |   |
| 6620 | CG     | CG      | . ASN ASN ASN B B 429 429 . | 0.2539 | 0.1683 | 0.2028 | -0.0320 | - |
|      | 0.0314 | 0.0216  | 1 .                         |        |        |        |         |   |
| 6621 | OD1    | OD1     | . ASN ASN ASN B B 429 429 . | 0.3595 | 0.2344 | 0.2162 | -0.1034 | - |
|      | 0.0609 | 0.0337  | 1 .                         |        |        |        |         |   |
| 6622 | ND2    | ND2     | . ASN ASN ASN B B 429 429 . | 0.2966 | 0.1303 | 0.2648 | -0.0453 | - |
|      | 0.0609 | 0.0636  | 1 .                         |        |        |        |         |   |
| 6623 | C      | C       | . ASN ASN ASN B B 429 429 . | 0.2056 | 0.1562 | 0.1663 | -0.0165 | - |
|      | 0.0185 | 0.0057  | 1 .                         |        |        |        |         |   |
| 6624 | O      | O       | . ASN ASN ASN B B 429 429 . | 0.2328 | 0.1364 | 0.1569 | 0.0020  | - |
|      | 0.0374 | -0.0020 | 1 .                         |        |        |        |         |   |
| 6625 | N      | N       | . PRO PRO PRO B B 430 430 . | 0.2106 | 0.1845 | 0.1520 | -0.0159 | - |
|      | 0.0069 | -0.0014 | 1 .                         |        |        |        |         |   |
| 6626 | CA     | CA      | . PRO PRO PRO B B 430 430 . | 0.2300 | 0.2101 | 0.1767 | -0.0146 | - |
|      | 0.0103 | 0.0059  | 1 .                         |        |        |        |         |   |
| 6627 | CB     | CB      | . PRO PRO PRO B B 430 430 . | 0.2317 | 0.2083 | 0.1671 | -0.0169 |   |
|      | 0.0078 | 0.0005  | 1 .                         |        |        |        |         |   |
| 6628 | CG     | CG      | . PRO PRO PRO B B 430 430 . | 0.2406 | 0.2234 | 0.1327 | -0.0258 | - |
|      | 0.0246 | 0.0184  | 1 .                         |        |        |        |         |   |
| 6629 | CD     | CD      | . PRO PRO PRO B B 430 430 . | 0.1926 | 0.1798 | 0.1434 | -0.0214 | - |
|      | 0.0133 | 0.0004  | 1 .                         |        |        |        |         |   |
| 6630 | C      | C       | . PRO PRO PRO B B 430 430 . | 0.2585 | 0.2403 | 0.2250 | -0.0198 | - |
|      | 0.0038 | 0.0021  | 1 .                         |        |        |        |         |   |
| 6631 | O      | O       | . PRO PRO PRO B B 430 430 . | 0.2535 | 0.2539 | 0.2241 | -0.0337 | - |
|      | 0.0057 | 0.0104  | 1 .                         |        |        |        |         |   |
| 6632 | N      | N       | . SER SER SER B B 431 431 . | 0.2850 | 0.2777 | 0.2691 | -0.0101 | - |
|      | 0.0082 | -0.0040 | 1 .                         |        |        |        |         |   |







|        |         |     |                             |        |        |        |         |   |
|--------|---------|-----|-----------------------------|--------|--------|--------|---------|---|
| 6687   | C       | C   | . GLY GLY GLY B B 559 559 . | 0.1569 | 0.1432 | 0.1291 | -0.0030 |   |
| 0.0019 | -0.0096 | 1 . |                             |        |        |        |         |   |
| 6688   | O       | O   | . GLY GLY GLY B B 559 559 . | 0.1648 | 0.1467 | 0.1037 | 0.0140  |   |
| 0.0085 | -0.0002 | 1 . |                             |        |        |        |         |   |
| 6689   | O       | O   | . HOH HOH HOH S . 1 1 .     | 0.0258 | 0.0345 | 0.0254 | -0.0021 |   |
| 0.0002 | -0.0008 | 1 . |                             |        |        |        |         |   |
| 6690   | O       | O   | . HOH HOH HOH S . 2 2 .     | 0.0262 | 0.0253 | 0.0273 | -0.0002 |   |
| 0.0013 | -0.0003 | 1 . |                             |        |        |        |         |   |
| 6691   | O       | O   | . HOH HOH HOH S . 3 3 .     | 0.0277 | 0.0413 | 0.0302 | 0.0023  |   |
| 0.0033 | 0.0050  | 1 . |                             |        |        |        |         |   |
| 6692   | O       | O   | . HOH HOH HOH S . 4 4 .     | 0.0402 | 0.0296 | 0.0352 | 0.0080  | - |
| 0.0121 | -0.0065 | 1 . |                             |        |        |        |         |   |
| 6693   | O       | O   | . HOH HOH HOH S . 5 5 .     | 0.0293 | 0.0287 | 0.0256 | -0.0036 |   |
| 0.0010 | -0.0009 | 1 . |                             |        |        |        |         |   |
| 6694   | O       | O   | . HOH HOH HOH S . 6 6 .     | 0.0271 | 0.0306 | 0.0255 | -0.0030 | - |
| 0.0006 | 0.0011  | 1 . |                             |        |        |        |         |   |
| 6695   | O       | O   | . HOH HOH HOH S . 7 7 .     | 0.0406 | 0.0302 | 0.0365 | 0.0074  |   |
| 0.0076 | 0.0007  | 1 . |                             |        |        |        |         |   |
| 6696   | O       | O   | . HOH HOH HOH S . 8 8 .     | 0.0350 | 0.0379 | 0.0318 | 0.0110  | - |
| 0.0078 | -0.0090 | 1 . |                             |        |        |        |         |   |
| 6697   | O       | O   | . HOH HOH HOH S . 9 9 .     | 0.0380 | 0.0302 | 0.0384 | 0.0079  | - |
| 0.0129 | -0.0080 | 1 . |                             |        |        |        |         |   |
| 6698   | O       | O   | . HOH HOH HOH S . 10 10 .   | 0.0281 | 0.0369 | 0.0255 | 0.0024  | - |
| 0.0002 | 0.0009  | 1 . |                             |        |        |        |         |   |
| 6699   | O       | O   | . HOH HOH HOH S . 11 11 .   | 0.0790 | 0.0519 | 0.0582 | -0.0121 | - |
| 0.0108 | -0.0246 | 1 . |                             |        |        |        |         |   |
| 6700   | O       | O   | . HOH HOH HOH S . 12 12 .   | 0.0561 | 0.0295 | 0.0638 | -0.0004 | - |
| 0.0042 | -0.0125 | 1 . |                             |        |        |        |         |   |
| 6701   | O       | O   | . HOH HOH HOH S . 13 13 .   | 0.0406 | 0.0603 | 0.0508 | 0.0187  |   |
| 0.0013 | -0.0157 | 1 . |                             |        |        |        |         |   |
| 6702   | O       | O   | . HOH HOH HOH S . 14 14 .   | 0.0388 | 0.0296 | 0.0537 | -0.0061 | - |
| 0.0108 | -0.0004 | 1 . |                             |        |        |        |         |   |
| 6703   | O       | O   | . HOH HOH HOH S . 15 15 .   | 0.0543 | 0.0275 | 0.0425 | -0.0080 |   |
| 0.0223 | -0.0061 | 1 . |                             |        |        |        |         |   |
| 6704   | O       | O   | . HOH HOH HOH S . 16 16 .   | 0.0889 | 0.0481 | 0.0460 | -0.0005 |   |
| 0.0120 | 0.0204  | 1 . |                             |        |        |        |         |   |
| 6705   | O       | O   | . HOH HOH HOH S . 17 17 .   | 0.0483 | 0.0296 | 0.0404 | 0.0099  | - |
| 0.0186 | -0.0080 | 1 . |                             |        |        |        |         |   |
| 6706   | O       | O   | . HOH HOH HOH S . 18 18 .   | 0.0316 | 0.0372 | 0.0253 | 0.0086  | - |
| 0.0006 | -0.0008 | 1 . |                             |        |        |        |         |   |
| 6707   | O       | O   | . HOH HOH HOH S . 19 19 .   | 0.0422 | 0.0436 | 0.0704 | -0.0163 |   |
| 0.0235 | -0.0170 | 1 . |                             |        |        |        |         |   |
| 6708   | O       | O   | . HOH HOH HOH S . 20 20 .   | 0.0375 | 0.0283 | 0.0324 | -0.0060 | - |
| 0.0092 | 0.0046  | 1 . |                             |        |        |        |         |   |
| 6709   | O       | O   | . HOH HOH HOH S . 21 21 .   | 0.0426 | 0.0592 | 0.0372 | -0.0178 |   |
| 0.0118 | -0.0198 | 1 . |                             |        |        |        |         |   |
| 6710   | O       | O   | . HOH HOH HOH S . 22 22 .   | 0.0477 | 0.0259 | 0.0257 | 0.0022  | - |
| 0.0029 | -0.0003 | 1 . |                             |        |        |        |         |   |
| 6711   | O       | O   | . HOH HOH HOH S . 23 23 .   | 0.1113 | 0.1226 | 0.0606 | 0.0054  |   |
| 0.0054 | -0.0081 | 1 . |                             |        |        |        |         |   |
| 6712   | O       | O   | . HOH HOH HOH S . 24 24 .   | 0.0788 | 0.0390 | 0.1043 | 0.0253  |   |
| 0.0062 | 0.0144  | 1 . |                             |        |        |        |         |   |
| 6713   | O       | O   | . HOH HOH HOH S . 25 25 .   | 0.1063 | 0.1177 | 0.0700 | 0.0232  |   |
| 0.0309 | -0.0326 | 1 . |                             |        |        |        |         |   |













































```

7254 O      O      . HOH HOH HOH S . 603 603 . 0.3548 0.1643 0.6062 -0.0756 -
0.1588 0.0790 1 .
7255 O      O      . HOH HOH HOH S . 604 604 . 0.5580 0.1770 0.3457 0.1062
0.1640 0.1305 1 .
7256 O      O      . HOH HOH HOH S . 605 605 . 0.6646 0.3213 0.9668 0.3971 -
0.1281 -0.2920 1 .
7257 O      O      . HOH HOH HOH S . 606 606 . 0.1986 0.2911 0.3323 0.0715 -
0.0883 0.1089 1 .
7258 O      O      . HOH HOH HOH S . 607 607 . 0.4670 0.0658 0.3008 0.0754
0.0807 0.0642 1 .
7259 O      O      . HOH HOH HOH S . 608 608 . 0.3150 0.5952 0.4318 -0.2350
0.0518 -0.4302 1 .
7260 O      O      . HOH HOH HOH S . 609 609 . 0.1760 0.2238 0.2056 -0.0135
0.0717 0.0227 1 .
7261 O      O      . HOH HOH HOH S . 612 612 . 0.4742 0.4642 0.3479 0.1390 -
0.3484 0.0107 1 .
7262 O      O      . HOH HOH HOH S . 613 613 . 0.3298 0.4159 0.6680 0.2267
0.1430 0.0663 1 .
7263 O      O      . HOH HOH HOH S . 614 614 . 0.5864 0.2894 0.7072 0.1136
0.1080 -0.1047 1 .
7264 O      O      . HOH HOH HOH S . 615 615 . 0.6686 0.8497 0.6147 -0.2584
0.3138 -0.4359 1 .
7265 O      O      . HOH HOH HOH S . 616 616 . 0.3092 0.2064 0.6139 -0.0784 -
0.1832 -0.2231 1 .
7266 O      O      . HOH HOH HOH S . 617 617 . 0.4392 0.2245 0.4369 -0.0948
0.1902 -0.1291 1 .
7267 O      O      . HOH HOH HOH S . 618 618 . 0.6926 0.1350 0.3307 0.0671 -
0.2738 0.0191 1 .
7268 O      O      . HOH HOH HOH S . 620 620 . 0.9974 0.8164 0.2713 -0.1267
0.1425 0.3047 1 .
7269 O      O      . HOH HOH HOH S . 621 621 . 0.4903 0.2002 0.3364 -0.1037
0.2087 -0.1121 1 .
7270 O      O      . HOH HOH HOH S . 623 623 . 0.1997 0.2911 0.1174 -0.1442
0.0353 0.0209 1 .
7271 O      O      . HOH HOH HOH S . 626 626 . 0.4173 0.6067 0.5057 -0.0824 -
0.0169 0.2753 1 .
7272 O      O      . HOH HOH HOH S . 630 630 . 0.4411 0.2889 0.1995 -0.1854
0.0918 -0.0653 1 .
7273 O      O      . HOH HOH HOH S . 632 632 . 0.7251 0.9997 0.3012 -0.0186
0.0157 0.0857 1 .
7274 O      O      . HOH HOH HOH S . 633 633 . 0.3053 0.4627 0.2391 -0.0193 -
0.0336 0.0786 1 .
7275 O      O      . HOH HOH HOH S . 634 634 . 0.3259 0.4306 0.5874 -0.2582
0.2576 -0.0137 1 .
7276 O      O      . HOH HOH HOH S . 635 635 . 0.0713 0.4508 0.5102 -0.1399
0.0366 -0.0993 1 .
7277 O      O      . HOH HOH HOH S . 636 636 . 0.4635 0.4074 0.1276 -0.0123
0.0437 0.0477 1 .

```

```

#
_atom_sites.entry_id          UNNAMED
_atom_sites.fract_transf_matrix[1][1]  0.009045
_atom_sites.fract_transf_matrix[1][2]  0.000000
_atom_sites.fract_transf_matrix[1][3]  0.000000
_atom_sites.fract_transf_matrix[2][1]  0.000000

```



```

_atom_sites.fract_transf_matrix[2][2]    0.008346
_atom_sites.fract_transf_matrix[2][3]    0.000000
_atom_sites.fract_transf_matrix[3][1]    0.000000
_atom_sites.fract_transf_matrix[3][2]    0.000000
_atom_sites.fract_transf_matrix[3][3]    0.014676
_atom_sites.fract_transf_vector[1]       0.000000
_atom_sites.fract_transf_vector[2]       0.000000
_atom_sites.fract_transf_vector[3]       0.000000
#
_cell.length_a      110.557
_cell.length_b      119.819
_cell.length_c       68.140
_cell.angle_alpha   90.000
_cell.angle_beta    90.000
_cell.angle_gamma   90.000
_cell.entry_id      UNNAMED
#
_computing.entry_id          UNNAMED
_computing.structure_refinement  'REFMAC 5.5.0109'
_computing.structure_solution   ?
_computing.pdbx_data_reduction_ds  HKL
_computing.pdbx_data_reduction_ii  HKL
_computing.cell_refinement        HKL
#
_data_extraction.software      pdb_extract
_data_extraction.extraction_date 'Fri Oct 21 12:38:13 2011'
_data_extraction.version       3.10
_data_extraction.release_date  'June 10, 2010'
_data_extraction.location      http://sw-tools.rcsb.org/apps/PDB_EXTRACT/
#
loop_
_database_2.database_id
_database_2.database_code
PDB  UNNAMED
RCSB UNNAMED
#
_database_PDB_remark.id      3
_database_PDB_remark.text
;
REMARK 3
REMARK 3 REFINEMENT.
REMARK 3   PROGRAM      : REFMAC 5.5.0109
REMARK 3   AUTHORS     : MURSHUDOV,VAGIN,DODSON
REMARK 3
REMARK 3   REFINEMENT TARGET : MAXIMUM LIKELIHOOD
REMARK 3
REMARK 3 DATA USED IN REFINEMENT.
REMARK 3   RESOLUTION RANGE HIGH (ANGSTROMS) : 1.40
REMARK 3   RESOLUTION RANGE LOW  (ANGSTROMS) : 81.25
REMARK 3   DATA CUTOFF          (SIGMA(F)) : NONE
REMARK 3   COMPLETENESS FOR RANGE (%)      : 77.74
REMARK 3   NUMBER OF REFLECTIONS          : 131411
REMARK 3
REMARK 3 FIT TO DATA USED IN REFINEMENT.

```

REMARK 3 CROSS-VALIDATION METHOD : THROUGHOUT  
REMARK 3 FREE R VALUE TEST SET SELECTION : RANDOM  
REMARK 3 R VALUE (WORKING + TEST SET) : 0.21821  
REMARK 3 R VALUE (WORKING SET) : 0.21630  
REMARK 3 FREE R VALUE : 0.25467  
REMARK 3 FREE R VALUE TEST SET SIZE (%) : 5.0  
REMARK 3 FREE R VALUE TEST SET COUNT : 6887  
REMARK 3  
REMARK 3 FIT IN THE HIGHEST RESOLUTION BIN.  
REMARK 3 TOTAL NUMBER OF BINS USED : 20  
REMARK 3 BIN RESOLUTION RANGE HIGH : 1.400  
REMARK 3 BIN RESOLUTION RANGE LOW : 1.437  
REMARK 3 REFLECTION IN BIN (WORKING SET) : 4829  
REMARK 3 BIN COMPLETENESS (WORKING+TEST) (%) : 38.83  
REMARK 3 BIN R VALUE (WORKING SET) : 0.275  
REMARK 3 BIN FREE R VALUE SET COUNT : 238  
REMARK 3 BIN FREE R VALUE : 0.342  
REMARK 3  
REMARK 3 NUMBER OF NON-HYDROGEN ATOMS USED IN REFINEMENT.  
REMARK 3 ALL ATOMS : 7277  
REMARK 3  
REMARK 3 B VALUES.  
REMARK 3 FROM WILSON PLOT (A\*\*2) : NULL  
REMARK 3 MEAN B VALUE (OVERALL, A\*\*2) : 9.170  
REMARK 3 OVERALL ANISOTROPIC B VALUE.  
REMARK 3 B11 (A\*\*2) : 1.17  
REMARK 3 B22 (A\*\*2) : -0.68  
REMARK 3 B33 (A\*\*2) : -0.50  
REMARK 3 B12 (A\*\*2) : 0.00  
REMARK 3 B13 (A\*\*2) : 0.00  
REMARK 3 B23 (A\*\*2) : 0.00  
REMARK 3  
REMARK 3 ESTIMATED OVERALL COORDINATE ERROR.  
REMARK 3 ESU BASED ON R VALUE (A) : 0.111  
REMARK 3 ESU BASED ON FREE R VALUE (A) : 0.093  
REMARK 3 ESU BASED ON MAXIMUM LIKELIHOOD (A) : 0.057  
REMARK 3 ESU FOR B VALUES BASED ON MAXIMUM LIKELIHOOD (A\*\*2) : 3.136  
REMARK 3  
REMARK 3 CORRELATION COEFFICIENTS.  
REMARK 3 CORRELATION COEFFICIENT FO-FC : 0.889  
REMARK 3 CORRELATION COEFFICIENT FO-FC FREE : 0.862  
REMARK 3  
REMARK 3 RMS DEVIATIONS FROM IDEAL VALUES COUNT RMS WEIGHT  
REMARK 3 BOND LENGTHS REFINED ATOMS (A) : 6785 ; 0.023 ; 0.022  
REMARK 3 BOND ANGLES REFINED ATOMS (DEGREES) : 9178 ; 1.987 ; 1.971  
REMARK 3 TORSION ANGLES, PERIOD 1 (DEGREES) : 867 ; 6.114 ; 5.000  
REMARK 3 TORSION ANGLES, PERIOD 2 (DEGREES) : 309 ; 39.979 ; 24.984  
REMARK 3 TORSION ANGLES, PERIOD 3 (DEGREES) : 1164 ; 14.912 ; 15.000  
REMARK 3 TORSION ANGLES, PERIOD 4 (DEGREES) : 40 ; 20.098 ; 15.000  
REMARK 3 CHIRAL-CENTER RESTRAINTS (A\*\*3) : 1027 ; 0.138 ; 0.200  
REMARK 3 GENERAL PLANES REFINED ATOMS (A) : 5134 ; 0.012 ; 0.021  
REMARK 3  
REMARK 3 ISOTROPIC THERMAL FACTOR RESTRAINTS. COUNT RMS WEIGHT  
REMARK 3 MAIN-CHAIN BOND REFINED ATOMS (A\*\*2) : 4301 ; 1.813 ; 1.500

```

REMARK 3 MAIN-CHAIN ANGLE REFINED ATOMS (A**2): 6872 ; 2.509 ; 2.000
REMARK 3 SIDE-CHAIN BOND REFINED ATOMS (A**2): 2484 ; 4.111 ; 3.000
REMARK 3 SIDE-CHAIN ANGLE REFINED ATOMS (A**2): 2306 ; 5.716 ; 4.500
REMARK 3
REMARK 3 ANISOTROPIC THERMAL FACTOR RESTRAINTS. COUNT RMS WEIGHT
REMARK 3 RIGID-BOND RESTRAINTS (A**2): 6785 ; 2.244 ; 3.000
REMARK 3
REMARK 3 NCS RESTRAINTS STATISTICS
REMARK 3 NUMBER OF NCS GROUPS : NULL
REMARK 3
REMARK 3 TWIN DETAILS
REMARK 3 NUMBER OF TWIN DOMAINS : NULL
REMARK 3
REMARK 3
REMARK 3 TLS DETAILS
REMARK 3 NUMBER OF TLS GROUPS : NULL
REMARK 3
REMARK 3
REMARK 3 BULK SOLVENT MODELLING.
REMARK 3 METHOD USED : MASK
REMARK 3 PARAMETERS FOR MASK CALCULATION
REMARK 3 VDW PROBE RADIUS : 1.40
REMARK 3 ION PROBE RADIUS : 0.80
REMARK 3 SHRINKAGE RADIUS : 0.80
REMARK 3
REMARK 3 OTHER REFINEMENT REMARKS:
REMARK 3 HYDROGENS HAVE BEEN ADDED IN THE RIDING POSITIONS
REMARK 3 U VALUES : REFINED INDIVIDUALLY
REMARK 3

```

```

;
#
_entity_poly.entity_id 1
_entity_poly.pdbx_seq_one_letter_code
;SIQKIWAREILDSRGNPTVEVDLYTAKGLFRAAVPSGASTGIYEALELRDGDQRYLKGK
VLKAVDHINSTIAPALISSGLSVVEQEKLDNLMLELDGTENKSKFGANAILGVSLAVCKA
GAAERELPLYRHIAQLAGNSDLILPVPFAFNVINGGSHAGNKLAMQEFMILPVGAEFRDA
MRLGAEVYHTLKGVIKDKYKDATNVGDEGGFAPNILENSEALELVKEAIDKAGYTEKIV
IGMDVAASEFYRDGKYDLDFKSPTDPSRYITGDQLGALYQDFVRDYPVVSIEDPFDQDDW
AAWSKFTANVGIQIVGDDLTVTNPKRIERAVEEKACNCLLLKVNQIGSVTEAIQACKLAQ
ENGGWVMVSHRSGETEDTFIADLVVGLCTGQIKTGAPCRSERLAKYNQLMRIEELGDEA
RFAGHNFRNPSVL

```

```

;
_entity_poly.pdbx_strand_id A,B
_entity_poly.type 'polypeptide(L)'
_entity_poly.pdbx_target_identifier ?
#

```

```

_entry.id UNNAMED
#

```

```

_exptl.crystals_number 1
_exptl.entry_id UNNAMED
_exptl.method 'X-RAY DIFFRACTION'
#

```

```

_exptl_crystal.id 1
_exptl_crystal.pdbx_mosaicity 0.503

```

|                                                              |                     |
|--------------------------------------------------------------|---------------------|
| _exptl_crystal.pdbx_mosaicity_esd                            | ?                   |
| _exptl_crystal.density_Matthews                              | ?                   |
| _exptl_crystal.density_diffrn                                | ?                   |
| _exptl_crystal.density_meas                                  | ?                   |
| _exptl_crystal.density_meas_temp                             | ?                   |
| _exptl_crystal.density_percent_sol                           | ?                   |
| _exptl_crystal.size_max                                      | ?                   |
| _exptl_crystal.size_mid                                      | ?                   |
| _exptl_crystal.size_min                                      | ?                   |
| _exptl_crystal.size_rad                                      | ?                   |
| #                                                            |                     |
| _refine.entry_id                                             | UNNAMED             |
| _refine.pdbx_refine_id                                       | 'X-RAY DIFFRACTION' |
| _refine.ls_d_res_high                                        | 1.4000              |
| _refine.ls_d_res_low                                         | 81.2500             |
| _refine.pdbx_ls_sigma_F                                      | 0.000               |
| _refine.pdbx_data_cutoff_high_absF                           | ?                   |
| _refine.pdbx_data_cutoff_low_absF                            | ?                   |
| _refine.ls_percent_reflns_obs                                | 77.7400             |
| _refine.ls_number_reflns_obs                                 | 138298              |
| _refine.ls_number_reflns_all                                 | ?                   |
| _refine.pdbx_ls_cross_valid_method                           | THROUGHOUT          |
| _refine.ls_matrix_type                                       | ?                   |
| _refine.pdbx_R_Free_selection_details                        | RANDOM              |
| _refine.details                                              |                     |
| ' HYDROGENS HAVE BEEN ADDED IN THE RIDING POSITIONS U VALUES | : REFINED           |
| INDIVIDUALLY '                                               |                     |
| _refine.ls_R_factor_all                                      | ?                   |
| _refine.ls_R_factor_obs                                      | 0.2182              |
| _refine.ls_R_factor_R_work                                   | 0.2163              |
| _refine.ls_wR_factor_R_work                                  | 0.1951              |
| _refine.ls_R_factor_R_free                                   | 0.2547              |
| _refine.ls_wR_factor_R_free                                  | 0.2254              |
| _refine.ls_percent_reflns_R_free                             | 5.0000              |
| _refine.ls_number_reflns_R_free                              | 6887                |
| _refine.ls_number_reflns_R_work                              | 131411              |
| _refine.ls_R_factor_R_free_error                             | ?                   |
| _refine.B_iso_mean                                           | 9.1705              |
| _refine.solvent_model_param_bsol                             | ?                   |
| _refine.solvent_model_param_ksol                             | ?                   |
| _refine.pdbx_isotropic_thermal_model                         | ?                   |
| _refine.aniso_B[1][1]                                        | 1.1700              |
| _refine.aniso_B[2][2]                                        | -0.6800             |
| _refine.aniso_B[3][3]                                        | -0.5000             |
| _refine.aniso_B[1][2]                                        | 0.0000              |
| _refine.aniso_B[1][3]                                        | 0.0000              |
| _refine.aniso_B[2][3]                                        | 0.0000              |
| _refine.correlation_coeff_Fo_to_Fc                           | 0.8890              |
| _refine.correlation_coeff_Fo_to_Fc_free                      | 0.8620              |
| _refine.overall_SU_R_Cruickshank_DPI                         | 0.1113              |
| _refine.pdbx_overall_SU_R_free_Cruickshank_DPI               | ?                   |
| _refine.pdbx_overall_SU_R_Blow_DPI                           | ?                   |
| _refine.pdbx_overall_SU_R_free_Blow_DPI                      | ?                   |
| _refine.overall_SU_R_free                                    | 0.0928              |

```

_refine.pdbx_overall_ESU_R          0.1110
_refine.pdbx_overall_ESU_R_Free     0.0930
_refine.overall_SU_ML               0.0570
_refine.overall_SU_B                3.1360
_refine.solvent_model_details       MASK
_refine.pdbx_solvent_vdw_probe_radii 1.4000
_refine.pdbx_solvent_ion_probe_radii 0.8000
_refine.pdbx_solvent_shrinkage_radii 0.8000
_refine.ls_number_parameters        ?
_refine.ls_number_restraints        ?
_refine.pdbx_starting_model         ?
_refine.pdbx_method_to_determine_struct ?
_refine.pdbx_stereochemistry_target_values 'MAXIMUM LIKELIHOOD'
_refine.pdbx_stereochem_target_val_spec_case ?
_refine.overall_FOM_work_R_set      0.8861
_refine.B_iso_max                   123.610
_refine.B_iso_min                   2.000
_refine.pdbx_overall_phase_error    ?
_refine.occupancy_max               1.000
_refine.occupancy_min               0.500
#
loop_
_refine_ls_restr.pdbx_refine_id
_refine_ls_restr.type
_refine_ls_restr.number
_refine_ls_restr.dev_ideal
_refine_ls_restr.dev_ideal_target
_refine_ls_restr.weight
_refine_ls_restr.pdbx_restraint_function
'X-RAY DIFFRACTION' r_bond_refined_d      6785 0.023 0.022 ? ?
'X-RAY DIFFRACTION' r_angle_refined_deg   9178 1.987 1.971 ? ?
'X-RAY DIFFRACTION' r_dihedral_angle_1_deg 867 6.114 5.000 ? ?
'X-RAY DIFFRACTION' r_dihedral_angle_2_deg 309 39.979 24.984 ? ?
'X-RAY DIFFRACTION' r_dihedral_angle_3_deg 1164 14.912 15.000 ? ?
'X-RAY DIFFRACTION' r_dihedral_angle_4_deg 40 20.098 15.000 ? ?
'X-RAY DIFFRACTION' r_chiral_restr        1027 0.138 0.200 ? ?
'X-RAY DIFFRACTION' r_gen_planes_refined  5134 0.012 0.021 ? ?
'X-RAY DIFFRACTION' r_mcbond_it           4301 1.813 1.500 ? ?
'X-RAY DIFFRACTION' r_mcbond_angle_it     6872 2.509 2.000 ? ?
'X-RAY DIFFRACTION' r_scbond_it           2484 4.111 3.000 ? ?
'X-RAY DIFFRACTION' r_scbond_angle_it     2306 5.716 4.500 ? ?
'X-RAY DIFFRACTION' r_rigid_bond_restr    6785 2.244 3.000 ? ?
#
_refine_ls_shell.d_res_high          1.4000
_refine_ls_shell.d_res_low           1.4370
_refine_ls_shell.pdbx_total_number_of_bins_used 20
_refine_ls_shell.percent_reflns_obs     38.8300
_refine_ls_shell.number_reflns_R_work   4829
_refine_ls_shell.R_factor_all          ?
_refine_ls_shell.R_factor_R_work       0.2750
_refine_ls_shell.R_factor_R_free       0.3420
_refine_ls_shell.percent_reflns_R_free  ?
_refine_ls_shell.number_reflns_R_free   238
_refine_ls_shell.R_factor_R_free_error  ?

```

```

_refine_ls_shell.number_reflns_all      5067
_refine_ls_shell.number_reflns_obs      ?
_refine_ls_shell.pdbx_refine_id         'X-RAY DIFFRACTION'
#
_reflns.entry_id                        UNNAMED
_reflns.d_resolution_high                1.400
_reflns.d_resolution_low                 50.000
_reflns.pdbx_number_measured_all         778718
_reflns.number_obs                       150755
_reflns.pdbx_Rmerge_I_obs                0.097
_reflns.pdbx_netI_over_av_sigmaI         22.970
_reflns.pdbx_netI_over_sigmaI            7.700
_reflns.pdbx_chi_squared                  1.697
_reflns.pdbx_redundancy                   5.200
_reflns.percent_possible_obs             84.600
_reflns.pdbx_Rmeas_mean                   0.097
_reflns.pdbx_average_I_obs               1451.700
_reflns.pdbx_average_sigmaI_obs          63.200
#
loop_
_reflns_shell.d_res_high
_reflns_shell.d_res_low
_reflns_shell.number_measured_obs
_reflns_shell.number_measured_all
_reflns_shell.number_unique_obs
_reflns_shell.pdbx_rejects
_reflns_shell.Rmerge_I_obs
_reflns_shell.meanI_over_sigI_obs
_reflns_shell.pdbx_Rsym_value
_reflns_shell.pdbx_chi_squared
_reflns_shell.pdbx_redundancy
_reflns_shell.percent_possible_obs
_reflns_shell.pdbx_Rmeas_mean
_reflns_shell.pdbx_netI_over_sigmaI_obs
_reflns_shell.pdbx_number_centric
_reflns_shell.pdbx_number_anomalous
_reflns_shell.pdbx_Rmerge_I_anomalous
_reflns_shell.pdbx_meanI_over_sigI_anomalous
_reflns_shell.pdbx_PCV_mean
_reflns_shell.number_possible
_reflns_shell.number_unique_all
_reflns_shell.Rmerge_F_all
_reflns_shell.Rmerge_F_obs
_reflns_shell.Rmerge_I_all
_reflns_shell.meanI_over_sigI_all
_reflns_shell.percent_possible_all
_reflns_shell.pdbx_Rrim_I_all
_reflns_shell.pdbx_Rpim_I_all
1.400 1.450  ? ? ? ? 0.791 ? ? 0.724 3.500 ? ? ? ? ? ? ? ? ? 9000 ? ? ? ?
51.000 ? ?
1.450 1.510  ? ? ? ? 0.688 ? ? 0.748 4.300 ? ? ? ? ? ? ? ? ? 11077 ? ? ? ?
62.800 ? ?
1.510 1.580  ? ? ? ? 0.593 ? ? 0.802 4.800 ? ? ? ? ? ? ? ? ? 12536 ? ? ? ?
71.000 ? ?

```

```

1.580 1.660 ? ? ? ? 0.508 ? ? 0.859 5.100 ? ? ? ? ? ? ? ? ? 14089 ? ? ? ?
79.600 ? ?
1.660 1.760 ? ? ? ? 0.382 ? ? 1.004 5.100 ? ? ? ? ? ? ? ? ? 15822 ? ? ? ?
89.500 ? ?
1.760 1.900 ? ? ? ? 0.284 ? ? 1.172 5.200 ? ? ? ? ? ? ? ? ? 17168 ? ? ? ?
96.600 ? ?
1.900 2.090 ? ? ? ? 0.192 ? ? 1.483 5.400 ? ? ? ? ? ? ? ? ? 17528 ? ? ? ?
98.600 ? ?
2.090 2.390 ? ? ? ? 0.130 ? ? 2.012 5.500 ? ? ? ? ? ? ? ? ? 17746 ? ? ? ?
99.400 ? ?
2.390 3.020 ? ? ? ? 0.091 ? ? 2.667 5.600 ? ? ? ? ? ? ? ? ? 17760 ? ? ? ?
98.900 ? ?
3.020 50.000 ? ? ? ? 0.057 ? ? 3.321 5.900 ? ? ? ? ? ? ? ? ? 18029 ? ? ? ?
97.300 ? ?
#
loop_
  _software.pdbx_ordinal
  _software.name
  _software.version
  _software.date
  _software.type
  _software.contact_author
  _software.contact_author_email
  _software.classification
  _software.location
  _software.language
1 HKL ? ? package 'Zbyszek Otwinowski' hkl@hkl-
xray.com
'data reduction' http://www.hkl-xray.com/ ?
2 REFMAC5 ? ? program 'Garib N. Murshudov'
garib@ysbl.york.ac.uk
refinement http://www.ccp4.ac.uk/dist/html/refmac5.html Fortran_77
3 pdb_extract 3.10 'June 10, 2010' package PDB
deposit@deposit.rcsb.org
'data extraction' http://sw-tools.pdb.org/apps/PDB_EXTRACT/ C++
#
_struct_biol.id 1
_struct_biol.details ?
#
_symmetry.space_group_name_H-M 'P 21 21 2'
_symmetry.entry_id UNNAMED
_symmetry.Int_Tables_number 18
#

```





|         |     |     |   |     |     |     |   |   |   |   |   |        |        |        |      |       |   |   |
|---------|-----|-----|---|-----|-----|-----|---|---|---|---|---|--------|--------|--------|------|-------|---|---|
| ATOM 19 | CD  | CD  | . | GLU | GLU | GLU | A | A | 3 | 3 | . | 11.332 | 20.153 | 15.153 | 1.00 | 38.15 | 1 | . |
| ATOM 20 | OE1 | OE1 | . | GLU | GLU | GLU | A | A | 3 | 3 | . | 11.678 | 21.004 | 14.267 | 1.00 | 40.65 | 1 | . |
| ATOM 21 | OE2 | OE2 | . | GLU | GLU | GLU | A | A | 3 | 3 | . | 10.146 | 20.103 | 15.563 | 1.00 | 42.35 | 1 | . |
| ATOM 22 | C   | C   | . | GLU | GLU | GLU | A | A | 3 | 3 | . | 15.784 | 17.983 | 14.288 | 1.00 | 18.73 | 1 | . |
| ATOM 23 | O   | O   | . | GLU | GLU | GLU | A | A | 3 | 3 | . | 15.683 | 17.071 | 13.490 | 1.00 | 20.01 | 1 | . |
| ATOM 24 | N   | N   | . | LYS | LYS | LYS | A | A | 4 | 4 | . | 16.760 | 18.901 | 14.217 | 1.00 | 16.27 | 1 | . |
| ATOM 25 | CA  | CA  | . | LYS | LYS | LYS | A | A | 4 | 4 | . | 17.734 | 18.906 | 13.107 | 1.00 | 15.33 | 1 | . |
| ATOM 26 | CB  | CB  | . | LYS | LYS | LYS | A | A | 4 | 4 | . | 17.101 | 19.469 | 11.832 | 1.00 | 16.13 | 1 | . |
| ATOM 27 | CG  | CG  | . | LYS | LYS | LYS | A | A | 4 | 4 | . | 18.087 | 19.508 | 10.729 | 1.00 | 19.16 | 1 | . |
| ATOM 28 | CD  | CD  | . | LYS | LYS | LYS | A | A | 4 | 4 | . | 17.450 | 20.150 | 9.473  | 1.00 | 24.57 | 1 | . |
| ATOM 29 | CE  | CE  | . | LYS | LYS | LYS | A | A | 4 | 4 | . | 18.483 | 20.110 | 8.290  | 1.00 | 24.45 | 1 | . |
| ATOM 30 | NZ  | NZ  | . | LYS | LYS | LYS | A | A | 4 | 4 | . | 17.781 | 20.625 | 7.059  | 1.00 | 34.71 | 1 | . |
| ATOM 31 | C   | C   | . | LYS | LYS | LYS | A | A | 4 | 4 | . | 18.890 | 19.814 | 13.549 | 1.00 | 14.74 | 1 | . |
| ATOM 32 | O   | O   | . | LYS | LYS | LYS | A | A | 4 | 4 | . | 18.642 | 20.798 | 14.298 | 1.00 | 15.00 | 1 | . |
| ATOM 33 | N   | N   | . | ILE | ILE | ILE | A | A | 5 | 5 | . | 20.102 | 19.416 | 13.187 | 1.00 | 12.32 | 1 | . |
| ATOM 34 | CA  | CA  | . | ILE | ILE | ILE | A | A | 5 | 5 | . | 21.294 | 20.252 | 13.407 | 1.00 | 13.31 | 1 | . |
| ATOM 35 | CB  | CB  | . | ILE | ILE | ILE | A | A | 5 | 5 | . | 22.208 | 19.650 | 14.475 | 1.00 | 11.91 | 1 | . |
| ATOM 36 | CG1 | CG1 | . | ILE | ILE | ILE | A | A | 5 | 5 | . | 21.558 | 19.881 | 15.848 | 1.00 | 11.87 | 1 | . |
| ATOM 37 | CD  | CD  | . | ILE | ILE | ILE | A | A | 5 | 5 | . | 22.266 | 19.051 | 16.970 | 1.00 | 16.19 | 1 | . |
| ATOM 38 | CG2 | CG2 | . | ILE | ILE | ILE | A | A | 5 | 5 | . | 23.646 | 20.226 | 14.392 | 1.00 | 14.15 | 1 | . |
| ATOM 39 | C   | C   | . | ILE | ILE | ILE | A | A | 5 | 5 | . | 22.016 | 20.339 | 12.087 | 1.00 | 14.49 | 1 | . |
| ATOM 40 | O   | O   | . | ILE | ILE | ILE | A | A | 5 | 5 | . | 22.273 | 19.300 | 11.373 | 1.00 | 16.48 | 1 | . |
| ATOM 41 | N   | N   | . | TRP | TRP | TRP | A | A | 6 | 6 | . | 22.367 | 21.581 | 11.705 | 1.00 | 13.62 | 1 | . |
| ATOM 42 | CA  | CA  | . | TRP | TRP | TRP | A | A | 6 | 6 | . | 23.161 | 21.751 | 10.502 | 1.00 | 13.06 | 1 | . |
| ATOM 43 | CB  | CB  | . | TRP | TRP | TRP | A | A | 6 | 6 | . | 22.272 | 22.167 | 9.289  | 1.00 | 11.41 | 1 | . |
| ATOM 44 | CG  | CG  | . | TRP | TRP | TRP | A | A | 6 | 6 | . | 23.092 | 22.196 | 8.014  | 1.00 | 14.43 | 1 | . |
| ATOM 45 | CD1 | CD1 | . | TRP | TRP | TRP | A | A | 6 | 6 | . | 23.518 | 23.312 | 7.320  | 1.00 | 13.23 | 1 | . |
| ATOM 46 | NE1 | NE1 | . | TRP | TRP | TRP | A | A | 6 | 6 | . | 24.254 | 22.947 | 6.241  | 1.00 | 16.64 | 1 | . |
| ATOM 47 | CE2 | CE2 | . | TRP | TRP | TRP | A | A | 6 | 6 | . | 24.333 | 21.579 | 6.167  | 1.00 | 16.97 | 1 | . |
| ATOM 48 | CD2 | CD2 | . | TRP | TRP | TRP | A | A | 6 | 6 | . | 23.647 | 21.057 | 7.293  | 1.00 | 15.22 | 1 | . |

|         |     |     |   |     |     |     |   |   |   |   |   |        |        |        |      |       |   |   |
|---------|-----|-----|---|-----|-----|-----|---|---|---|---|---|--------|--------|--------|------|-------|---|---|
| ATOM 49 | CE3 | CE3 | . | TRP | TRP | TRP | A | A | 6 | 6 | . | 23.579 | 19.645 | 7.460  | 1.00 | 16.36 | 1 | . |
| ATOM 50 | CZ3 | CZ3 | . | TRP | TRP | TRP | A | A | 6 | 6 | . | 24.231 | 18.822 | 6.496  | 1.00 | 16.47 | 1 | . |
| ATOM 51 | CH2 | CH2 | . | TRP | TRP | TRP | A | A | 6 | 6 | . | 24.907 | 19.398 | 5.413  | 1.00 | 19.19 | 1 | . |
| ATOM 52 | CZ2 | CZ2 | . | TRP | TRP | TRP | A | A | 6 | 6 | . | 24.976 | 20.764 | 5.235  | 1.00 | 19.41 | 1 | . |
| ATOM 53 | C   | C   | . | TRP | TRP | TRP | A | A | 6 | 6 | . | 24.215 | 22.819 | 10.704 | 1.00 | 12.88 | 1 | . |
| ATOM 54 | O   | O   | . | TRP | TRP | TRP | A | A | 6 | 6 | . | 23.895 | 23.963 | 11.083 | 1.00 | 14.19 | 1 | . |
| ATOM 55 | N   | N   | . | ALA | ALA | ALA | A | A | 7 | 7 | . | 25.457 | 22.417 | 10.484 | 1.00 | 10.50 | 1 | . |
| ATOM 56 | CA  | CA  | . | ALA | ALA | ALA | A | A | 7 | 7 | . | 26.599 | 23.296 | 10.603 | 1.00 | 11.98 | 1 | . |
| ATOM 57 | CB  | CB  | . | ALA | ALA | ALA | A | A | 7 | 7 | . | 27.739 | 22.598 | 11.352 | 1.00 | 12.95 | 1 | . |
| ATOM 58 | C   | C   | . | ALA | ALA | ALA | A | A | 7 | 7 | . | 27.123 | 23.743 | 9.247  | 1.00 | 11.45 | 1 | . |
| ATOM 59 | O   | O   | . | ALA | ALA | ALA | A | A | 7 | 7 | . | 27.007 | 22.994 | 8.240  | 1.00 | 11.45 | 1 | . |
| ATOM 60 | N   | N   | . | ARG | ARG | ARG | A | A | 8 | 8 | . | 27.837 | 24.882 | 9.248  | 1.00 | 10.88 | 1 | . |
| ATOM 61 | CA  | CA  | . | ARG | ARG | ARG | A | A | 8 | 8 | . | 28.491 | 25.378 | 8.013  | 1.00 | 11.02 | 1 | . |
| ATOM 62 | CB  | CB  | . | ARG | ARG | ARG | A | A | 8 | 8 | . | 27.520 | 26.280 | 7.235  | 1.00 | 10.43 | 1 | . |
| ATOM 63 | CG  | CG  | . | ARG | ARG | ARG | A | A | 8 | 8 | . | 27.236 | 27.636 | 7.940  | 1.00 | 11.70 | 1 | . |
| ATOM 64 | CD  | CD  | . | ARG | ARG | ARG | A | A | 8 | 8 | . | 26.280 | 28.566 | 7.135  | 1.00 | 12.33 | 1 | . |
| ATOM 65 | NE  | NE  | . | ARG | ARG | ARG | A | A | 8 | 8 | . | 24.963 | 27.902 | 6.981  | 1.00 | 12.27 | 1 | . |
| ATOM 66 | CZ  | CZ  | . | ARG | ARG | ARG | A | A | 8 | 8 | . | 24.045 | 27.808 | 7.935  | 1.00 | 12.45 | 1 | . |
| ATOM 67 | NH1 | NH1 | . | ARG | ARG | ARG | A | A | 8 | 8 | . | 24.167 | 28.494 | 9.107  | 1.00 | 12.36 | 1 | . |
| ATOM 68 | NH2 | NH2 | . | ARG | ARG | ARG | A | A | 8 | 8 | . | 22.938 | 27.085 | 7.705  | 1.00 | 14.58 | 1 | . |
| ATOM 69 | C   | C   | . | ARG | ARG | ARG | A | A | 8 | 8 | . | 29.750 | 26.153 | 8.357  | 1.00 | 11.67 | 1 | . |
| ATOM 70 | O   | O   | . | ARG | ARG | ARG | A | A | 8 | 8 | . | 29.944 | 26.524 | 9.522  | 1.00 | 12.43 | 1 | . |
| ATOM 71 | N   | N   | . | GLU | GLU | GLU | A | A | 9 | 9 | . | 30.581 | 26.471 | 7.357  | 1.00 | 10.59 | 1 | . |
| ATOM 72 | CA  | CA  | . | GLU | GLU | GLU | A | A | 9 | 9 | . | 31.753 | 27.309 | 7.535  | 1.00 | 12.62 | 1 | . |
| ATOM 73 | CB  | CB  | . | GLU | GLU | GLU | A | A | 9 | 9 | . | 32.759 | 26.748 | 6.537  | 1.00 | 15.14 | 1 | . |
| ATOM 74 | CG  | CG  | . | GLU | GLU | GLU | A | A | 9 | 9 | . | 34.097 | 27.192 | 6.546  | 1.00 | 20.31 | 1 | . |
| ATOM 75 | CD  | CD  | . | GLU | GLU | GLU | A | A | 9 | 9 | . | 34.919 | 26.468 | 5.457  | 1.00 | 18.44 | 1 | . |
| ATOM 76 | OE1 | OE1 | . | GLU | GLU | GLU | A | A | 9 | 9 | . | 35.975 | 25.865 | 5.797  | 1.00 | 15.33 | 1 | . |
| ATOM 77 | OE2 | OE2 | . | GLU | GLU | GLU | A | A | 9 | 9 | . | 34.509 | 26.557 | 4.244  | 1.00 | 19.38 | 1 | . |
| ATOM 78 | C   | C   | . | GLU | GLU | GLU | A | A | 9 | 9 | . | 31.268 | 28.748 | 7.183  | 1.00 | 12.29 | 1 | . |

|          |     |     |   |     |     |     |   |   |    |    |   |        |        |        |      |       |   |   |
|----------|-----|-----|---|-----|-----|-----|---|---|----|----|---|--------|--------|--------|------|-------|---|---|
| ATOM 79  | O   | O   | . | GLU | GLU | GLU | A | A | 9  | 9  | . | 30.596 | 28.950 | 6.137  | 1.00 | 17.13 | 1 | . |
| ATOM 80  | N   | N   | . | ILE | ILE | ILE | A | A | 10 | 10 | . | 31.564 | 29.680 | 8.085  | 1.00 | 10.79 | 1 | . |
| ATOM 81  | CA  | CA  | . | ILE | ILE | ILE | A | A | 10 | 10 | . | 31.410 | 31.112 | 7.814  | 1.00 | 10.88 | 1 | . |
| ATOM 82  | CB  | CB  | . | ILE | ILE | ILE | A | A | 10 | 10 | . | 30.365 | 31.756 | 8.757  | 1.00 | 10.05 | 1 | . |
| ATOM 83  | CG1 | CG1 | . | ILE | ILE | ILE | A | A | 10 | 10 | . | 30.777 | 31.613 | 10.245 | 1.00 | 11.75 | 1 | . |
| ATOM 84  | CD  | CD  | . | ILE | ILE | ILE | A | A | 10 | 10 | . | 29.967 | 32.567 | 11.133 | 1.00 | 14.23 | 1 | . |
| ATOM 85  | CG2 | CG2 | . | ILE | ILE | ILE | A | A | 10 | 10 | . | 28.919 | 31.209 | 8.472  | 1.00 | 13.45 | 1 | . |
| ATOM 86  | C   | C   | . | ILE | ILE | ILE | A | A | 10 | 10 | . | 32.779 | 31.739 | 7.958  | 1.00 | 11.54 | 1 | . |
| ATOM 87  | O   | O   | . | ILE | ILE | ILE | A | A | 10 | 10 | . | 33.737 | 31.049 | 8.300  | 1.00 | 12.60 | 1 | . |
| ATOM 88  | N   | N   | . | LEU | LEU | LEU | A | A | 11 | 11 | . | 32.897 | 33.045 | 7.675  | 1.00 | 9.67  | 1 | . |
| ATOM 89  | CA  | CA  | . | LEU | LEU | LEU | A | A | 11 | 11 | . | 34.155 | 33.711 | 7.960  | 1.00 | 8.55  | 1 | . |
| ATOM 90  | CB  | CB  | . | LEU | LEU | LEU | A | A | 11 | 11 | . | 34.602 | 34.647 | 6.797  | 1.00 | 9.61  | 1 | . |
| ATOM 91  | CG  | CG  | . | LEU | LEU | LEU | A | A | 11 | 11 | . | 34.814 | 33.844 | 5.467  | 1.00 | 10.79 | 1 | . |
| ATOM 92  | CD1 | CD1 | . | LEU | LEU | LEU | A | A | 11 | 11 | . | 35.417 | 34.879 | 4.465  | 1.00 | 13.38 | 1 | . |
| ATOM 93  | CD2 | CD2 | . | LEU | LEU | LEU | A | A | 11 | 11 | . | 35.848 | 32.683 | 5.696  | 1.00 | 16.13 | 1 | . |
| ATOM 94  | C   | C   | . | LEU | LEU | LEU | A | A | 11 | 11 | . | 34.056 | 34.533 | 9.230  | 1.00 | 8.49  | 1 | . |
| ATOM 95  | O   | O   | . | LEU | LEU | LEU | A | A | 11 | 11 | . | 33.075 | 35.252 | 9.438  | 1.00 | 8.90  | 1 | . |
| ATOM 96  | N   | N   | . | ASP | ASP | ASP | A | A | 12 | 12 | . | 35.140 | 34.485 | 9.979  | 1.00 | 9.54  | 1 | . |
| ATOM 97  | CA  | CA  | . | ASP | ASP | ASP | A | A | 12 | 12 | . | 35.322 | 35.335 | 11.190 | 1.00 | 8.87  | 1 | . |
| ATOM 98  | CB  | CB  | . | ASP | ASP | ASP | A | A | 12 | 12 | . | 36.204 | 34.598 | 12.280 | 1.00 | 8.93  | 1 | . |
| ATOM 99  | CG  | CG  | . | ASP | ASP | ASP | A | A | 12 | 12 | . | 37.719 | 34.613 | 11.987 | 1.00 | 12.39 | 1 | . |
| ATOM 100 | OD1 | OD1 | . | ASP | ASP | ASP | A | A | 12 | 12 | . | 38.176 | 35.325 | 11.074 | 1.00 | 11.93 | 1 | . |
| ATOM 101 | OD2 | OD2 | . | ASP | ASP | ASP | A | A | 12 | 12 | . | 38.482 | 33.964 | 12.778 | 1.00 | 14.43 | 1 | . |
| ATOM 102 | C   | C   | . | ASP | ASP | ASP | A | A | 12 | 12 | . | 35.816 | 36.728 | 10.879 | 1.00 | 10.34 | 1 | . |
| ATOM 103 | O   | O   | . | ASP | ASP | ASP | A | A | 12 | 12 | . | 35.977 | 37.099 | 9.699  | 1.00 | 8.92  | 1 | . |
| ATOM 104 | N   | N   | . | SER | SER | SER | A | A | 13 | 13 | . | 36.107 | 37.514 | 11.950 | 1.00 | 8.76  | 1 | . |
| ATOM 105 | CA  | CA  | . | SER | SER | SER | A | A | 13 | 13 | . | 36.356 | 38.935 | 11.739 | 1.00 | 9.20  | 1 | . |
| ATOM 106 | CB  | CB  | . | SER | SER | SER | A | A | 13 | 13 | . | 36.252 | 39.672 | 13.061 | 1.00 | 9.68  | 1 | . |
| ATOM 107 | OG  | OG  | . | SER | SER | SER | A | A | 13 | 13 | . | 37.167 | 39.133 | 14.013 | 1.00 | 11.48 | 1 | . |
| ATOM 108 | C   | C   | . | SER | SER | SER | A | A | 13 | 13 | . | 37.726 | 39.203 | 11.092 | 1.00 | 8.68  | 1 | . |



































































ATOM 979 O O . HIS HIS HIS A A 132 132 . 20.082 29.604 32.388 1.00 15.17 1 .  
.  
ATOM 980 N N . ILE ILE ILE A A 133 133 . 20.925 31.321 31.218 1.00 13.81 1 .  
.  
ATOM 981 CA CA . ILE ILE ILE A A 133 133 . 22.272 31.081 31.701 1.00 13.71 1 .  
.  
ATOM 982 CB CB . ILE ILE ILE A A 133 133 . 23.236 32.049 30.976 1.00 13.80 1 .  
.  
ATOM 983 CG1 CG1 . ILE ILE ILE A A 133 133 . 23.335 31.529 29.499 1.00 13.50 1 .  
.  
ATOM 984 CD CD . ILE ILE ILE A A 133 133 . 24.170 32.569 28.599 1.00 15.35 1 .  
.  
ATOM 985 CG2 CG2 . ILE ILE ILE A A 133 133 . 24.630 32.090 31.692 1.00 15.54 1 .  
.  
ATOM 986 C C . ILE ILE ILE A A 133 133 . 22.336 31.293 33.240 1.00 14.53 1 .  
.  
ATOM 987 O O . ILE ILE ILE A A 133 133 . 22.988 30.513 33.895 1.00 17.28 1 .  
.  
ATOM 988 N N . ALA ALA ALA A A 134 134 . 21.733 32.362 33.760 1.00 16.81 1 .  
.  
ATOM 989 CA CA . ALA ALA ALA A A 134 134 . 21.633 32.578 35.228 1.00 17.30 1 .  
.  
ATOM 990 CB CB . ALA ALA ALA A A 134 134 . 20.813 33.808 35.532 1.00 17.72 1 .  
.  
ATOM 991 C C . ALA ALA ALA A A 134 134 . 21.064 31.316 35.897 1.00 18.35 1 .  
.  
ATOM 992 O O . ALA ALA ALA A A 134 134 . 21.615 30.800 36.888 1.00 19.30 1 .  
.  
ATOM 993 N N . GLN GLN GLN A A 135 135 . 20.017 30.762 35.327 1.00 19.36 1 .  
.  
ATOM 994 CA CA . GLN GLN GLN A A 135 135 . 19.427 29.550 35.943 1.00 19.38 1 .  
.  
ATOM 995 CB CB . GLN GLN GLN A A 135 135 . 18.082 29.212 35.314 1.00 18.68 1 .  
.  
ATOM 996 CG CG . GLN GLN GLN A A 135 135 . 17.114 30.269 35.726 1.00 22.15 1 .  
.  
ATOM 997 CD CD . GLN GLN GLN A A 135 135 . 15.657 30.006 35.282 1.00 23.64 1 .  
.  
ATOM 998 OE1 OE1 . GLN GLN GLN A A 135 135 . 15.336 28.979 34.622 1.00 29.04 1 .  
.  
ATOM 999 NE2 NE2 . GLN GLN GLN A A 135 135 . 14.767 30.937 35.663 1.00 26.12 1 .  
.  
ATOM 1000 C C . GLN GLN GLN A A 135 135 . 20.371 28.351 35.903 1.00 20.06 1 .  
.  
ATOM 1001 O O . GLN GLN GLN A A 135 135 . 20.488 27.620 36.896 1.00 22.19 1 .  
.  
ATOM 1002 N N . LEU LEU LEU A A 136 136 . 21.052 28.148 34.763 1.00 18.55 1 .  
.  
ATOM 1003 CA CA . LEU LEU LEU A A 136 136 . 22.017 27.078 34.636 1.00 20.00 1 .  
.  
ATOM 1004 CB CB . LEU LEU LEU A A 136 136 . 22.695 27.060 33.254 1.00 18.55 1 .  
.  
ATOM 1005 CG CG . LEU LEU LEU A A 136 136 . 21.782 26.650 32.102 1.00 15.40 1 .  
.  
ATOM 1006 CD1 CD1 . LEU LEU LEU A A 136 136 . 22.521 26.817 30.767 1.00 16.65 1 .  
.  
ATOM 1007 CD2 CD2 . LEU LEU LEU A A 136 136 . 21.321 25.162 32.258 1.00 19.35 1 .  
.  
ATOM 1008 C C . LEU LEU LEU A A 136 136 . 23.121 27.222 35.686 1.00 20.86 1 .  
.  
.







ATOM 1099 O O . PHE PHE PHE A A 149 149 . 39.889 49.283 26.057 1.00 15.39 1 .  
.ATOM 1100 N N . ASN ASN ASN A A 150 150 . 39.595 47.553 24.614 1.00 15.21 1 .  
.ATOM 1101 CA CA . ASN ASN ASN A A 150 150 . 41.008 47.489 24.187 1.00 16.22 1 .  
.ATOM 1102 CB CB . ASN ASN ASN A A 150 150 . 41.221 46.050 23.613 1.00 17.50 1 .  
.ATOM 1103 CG CG . ASN ASN ASN A A 150 150 . 42.607 45.782 23.030 1.00 21.42 1 .  
.ATOM 1104 OD1 OD1 . ASN ASN ASN A A 150 150 . 42.816 44.716 22.386 1.00 24.81 1 .  
.ATOM 1105 ND2 ND2 . ASN ASN ASN A A 150 150 . 43.589 46.691 23.278 1.00 18.54 1 .  
.ATOM 1106 C C . ASN ASN ASN A A 150 150 . 41.257 48.552 23.140 1.00 18.34 1 .  
.ATOM 1107 O O . ASN ASN ASN A A 150 150 . 41.095 48.272 21.936 1.00 19.60 1 .  
.ATOM 1108 N N . VAL VAL VAL A A 151 151 . 41.746 49.735 23.561 1.00 16.78 1 .  
.ATOM 1109 CA CA . VAL VAL VAL A A 151 151 . 41.785 50.882 22.682 1.00 18.11 1 .  
.ATOM 1110 CB CB . VAL VAL VAL A A 151 151 . 41.256 52.124 23.393 1.00 19.63 1 .  
.ATOM 1111 CG1 CG1 . VAL VAL VAL A A 151 151 . 39.776 51.915 23.805 1.00 21.15 1 .  
.ATOM 1112 CG2 CG2 . VAL VAL VAL A A 151 151 . 42.191 52.532 24.587 1.00 19.06 1 .  
.ATOM 1113 C C . VAL VAL VAL A A 151 151 . 43.125 51.119 22.007 1.00 17.75 1 .  
.ATOM 1114 O O . VAL VAL VAL A A 151 151 . 43.132 51.964 21.078 1.00 18.41 1 .  
.ATOM 1115 N N . ILE ILE ILE A A 152 152 . 44.204 50.445 22.447 1.00 16.52 1 .  
.ATOM 1116 CA CA . ILE ILE ILE A A 152 152 . 45.442 50.414 21.737 1.00 20.02 1 .  
.ATOM 1117 CB CB . ILE ILE ILE A A 152 152 . 46.620 51.256 22.401 1.00 19.56 1 .  
.ATOM 1118 CG1 CG1 . ILE ILE ILE A A 152 152 . 46.180 52.729 22.394 1.00 21.74 1 .  
.ATOM 1119 CD CD . ILE ILE ILE A A 152 152 . 47.145 53.713 22.957 1.00 21.46 1 .  
.ATOM 1120 CG2 CG2 . ILE ILE ILE A A 152 152 . 47.952 50.987 21.608 1.00 21.48 1 .  
.ATOM 1121 C C . ILE ILE ILE A A 152 152 . 45.807 48.951 21.652 1.00 20.40 1 .  
.ATOM 1122 O O . ILE ILE ILE A A 152 152 . 45.872 48.247 22.673 1.00 21.19 1 .  
.ATOM 1123 N N . ASN ASN ASN A A 153 153 . 45.992 48.473 20.394 1.00 20.42 1 .  
.ATOM 1124 CA CA . ASN ASN ASN A A 153 153 . 46.286 47.089 20.174 1.00 20.35 1 .  
.ATOM 1125 CB CB . ASN ASN ASN A A 153 153 . 45.531 46.585 18.924 1.00 19.34 1 .  
.ATOM 1126 CG CG . ASN ASN ASN A A 153 153 . 44.004 46.443 19.147 1.00 23.02 1 .  
.ATOM 1127 OD1 OD1 . ASN ASN ASN A A 153 153 . 43.261 46.076 18.204 1.00 20.12 1 .  
.ATOM 1128 ND2 ND2 . ASN ASN ASN A A 153 153 . 43.525 46.758 20.374 1.00 25.45 1 .  
.

ATOM 1129 C C . ASN ASN ASN A A 153 153 . 47.744 46.948 19.890 1.00 20.99 1 .  
.ATOM 1130 O O . ASN ASN ASN A A 153 153 . 48.312 47.778 19.125 1.00 21.93 1 .  
.ATOM 1131 N N . GLY GLY GLY A A 154 154 . 48.357 45.955 20.487 1.00 23.12 1 .  
.ATOM 1132 CA CA . GLY GLY GLY A A 154 154 . 49.757 45.609 20.193 1.00 22.65 1 .  
.ATOM 1133 C C . GLY GLY GLY A A 154 154 . 49.933 44.094 20.064 1.00 21.06 1 .  
.ATOM 1134 O O . GLY GLY GLY A A 154 154 . 48.983 43.380 19.722 1.00 20.81 1 .  
.ATOM 1135 N N . GLY GLY GLY A A 155 155 . 51.116 43.582 20.384 1.00 19.67 1 .  
.ATOM 1136 CA CA . GLY GLY GLY A A 155 155 . 51.394 42.166 20.335 1.00 21.63 1 .  
.ATOM 1137 C C . GLY GLY GLY A A 155 155 . 51.028 41.506 19.012 1.00 23.48 1 .  
.ATOM 1138 O O . GLY GLY GLY A A 155 155 . 51.220 42.083 17.908 1.00 22.67 1 .  
.ATOM 1139 N N . SER SER SER A A 156 156 . 50.422 40.319 19.116 1.00 23.09 1 .  
.ATOM 1140 CA CA . SER SER SER A A 156 156 . 50.100 39.548 17.936 1.00 25.03 1 .  
.ATOM 1141 CB CB . SER SER SER A A 156 156 . 49.913 38.078 18.364 1.00 25.22 1 .  
.ATOM 1142 OG OG . SER SER SER A A 156 156 . 51.183 37.508 18.765 1.00 27.17 1 .  
.ATOM 1143 C C . SER SER SER A A 156 156 . 48.835 40.047 17.229 1.00 23.13 1 .  
.ATOM 1144 O O . SER SER SER A A 156 156 . 48.406 39.422 16.239 1.00 24.90 1 .  
.ATOM 1145 N N . HIS HIS HIS A A 157 157 . 48.251 41.158 17.718 1.00 21.27 1 .  
.ATOM 1146 CA CA . HIS HIS HIS A A 157 157 . 47.037 41.689 17.101 1.00 20.21 1 .  
.ATOM 1147 CB CB . HIS HIS HIS A A 157 157 . 46.036 42.125 18.189 1.00 21.05 1 .  
.ATOM 1148 CG CG . HIS HIS HIS A A 157 157 . 45.529 40.990 19.022 1.00 19.58 1 .  
.ATOM 1149 ND1 ND1 . HIS HIS HIS A A 157 157 . 44.778 41.182 20.173 1.00 20.97 1 .  
.ATOM 1150 CE1 CE1 . HIS HIS HIS A A 157 157 . 44.496 40.000 20.707 1.00 23.20 1 .  
.ATOM 1151 NE2 NE2 . HIS HIS HIS A A 157 157 . 45.048 39.052 19.950 1.00 20.86 1 .  
.ATOM 1152 CD2 CD2 . HIS HIS HIS A A 157 157 . 45.707 39.650 18.894 1.00 22.16 1 .  
.ATOM 1153 C C . HIS HIS HIS A A 157 157 . 47.245 42.906 16.276 1.00 20.42 1 .  
.ATOM 1154 O O . HIS HIS HIS A A 157 157 . 46.245 43.438 15.737 1.00 18.43 1 .  
.ATOM 1155 N N . ALA ALA ALA A A 158 158 . 48.509 43.380 16.122 1.00 20.71 1 .  
.ATOM 1156 CA CA . ALA ALA ALA A A 158 158 . 48.685 44.618 15.348 1.00 21.20 1 .  
.ATOM 1157 CB CB . ALA ALA ALA A A 158 158 . 48.418 45.878 16.208 1.00 21.98 1 .  
.ATOM 1158 C C . ALA ALA ALA A A 158 158 . 50.081 44.653 14.689 1.00 21.28 1 .  
.

ATOM 1159 O O . ALA ALA ALA A A 158 158 . 51.000 43.969 15.162 1.00 23.06 1 .  
.  
ATOM 1160 N N . GLY GLY GLY A A 159 159 . 50.140 45.388 13.596 1.00 22.84 1 .  
.  
ATOM 1161 CA CA . GLY GLY GLY A A 159 159 . 51.372 45.667 12.858 1.00 25.69 1 .  
.  
ATOM 1162 C C . GLY GLY GLY A A 159 159 . 51.997 46.912 13.508 1.00 26.51 1 .  
.  
ATOM 1163 O O . GLY GLY GLY A A 159 159 . 51.732 48.054 13.115 1.00 30.37 1 .  
.  
ATOM 1164 N N . ASN ASN ASN A A 160 160 . 52.768 46.695 14.552 1.00 27.41 1 .  
.  
ATOM 1165 CA CA . ASN ASN ASN A A 160 160 . 53.532 47.786 15.193 1.00 25.66 1 .  
.  
ATOM 1166 CB CB . ASN ASN ASN A A 160 160 . 52.636 48.795 15.970 1.00 24.31 1 .  
.  
ATOM 1167 CG CG . ASN ASN ASN A A 160 160 . 51.687 48.126 17.020 1.00 25.70 1 .  
.  
ATOM 1168 OD1 OD1 . ASN ASN ASN A A 160 160 . 51.781 46.915 17.330 1.00 21.24 1 .  
.  
ATOM 1169 ND2 ND2 . ASN ASN ASN A A 160 160 . 50.791 48.976 17.624 1.00 24.16 1 .  
.  
ATOM 1170 C C . ASN ASN ASN A A 160 160 . 54.571 47.067 16.025 1.00 23.79 1 .  
.  
ATOM 1171 O O . ASN ASN ASN A A 160 160 . 54.570 45.843 16.010 1.00 24.11 1 .  
.  
ATOM 1172 N N . LYS LYS LYS A A 161 161 . 55.508 47.769 16.682 1.00 23.28 1 .  
.  
ATOM 1173 CA CA . LYS LYS LYS A A 161 161 . 56.495 47.062 17.513 1.00 23.98 1 .  
.  
ATOM 1174 CB CB . LYS LYS LYS A A 161 161 . 57.764 47.901 17.671 1.00 24.15 1 .  
.  
ATOM 1175 CG CG . LYS LYS LYS A A 161 161 . 58.362 48.384 16.265 1.00 30.08 1 .  
.  
ATOM 1176 CD CD . LYS LYS LYS A A 161 161 . 59.847 48.828 16.446 1.00 35.48 1 .  
.  
ATOM 1177 CE CE . LYS LYS LYS A A 161 161 . 60.430 49.328 15.155 1.00 38.10 1 .  
.  
ATOM 1178 NZ NZ . LYS LYS LYS A A 161 161 . 61.689 50.121 15.472 1.00 40.34 1 .  
.  
ATOM 1179 C C . LYS LYS LYS A A 161 161 . 55.967 46.782 18.904 1.00 23.96 1 .  
.  
ATOM 1180 O O . LYS LYS LYS A A 161 161 . 56.466 45.892 19.560 1.00 25.33 1 .  
.  
ATOM 1181 N N . LEU LEU LEU A A 162 162 . 54.963 47.572 19.329 1.00 25.16 1 .  
.  
ATOM 1182 CA CA . LEU LEU LEU A A 162 162 . 54.359 47.495 20.688 1.00 23.88 1 .  
.  
ATOM 1183 CB CB . LEU LEU LEU A A 162 162 . 53.070 48.290 20.646 1.00 23.39 1 .  
.  
ATOM 1184 CG CG . LEU LEU LEU A A 162 162 . 52.315 48.495 21.996 1.00 23.40 1 .  
.  
ATOM 1185 CD1 CD1 . LEU LEU LEU A A 162 162 . 53.125 49.409 22.919 1.00 27.59 1 .  
.  
ATOM 1186 CD2 CD2 . LEU LEU LEU A A 162 162 . 51.013 49.210 21.651 1.00 24.56 1 .  
.  
ATOM 1187 C C . LEU LEU LEU A A 162 162 . 54.139 45.999 21.069 1.00 23.26 1 .  
.  
ATOM 1188 O O . LEU LEU LEU A A 162 162 . 53.370 45.300 20.363 1.00 24.18 1 .  
.  
.

















ATOM 1399 O O . HIS HIS HIS A A 189 189 . 39.189 60.694 19.120 1.00 18.68 1 .  
.  
ATOM 1400 N N . THR THR THR A A 190 190 . 38.559 60.486 21.302 1.00 16.39 1 .  
.  
ATOM 1401 CA CA . THR THR THR A A 190 190 . 39.519 61.506 21.756 1.00 17.88 1 .  
.  
ATOM 1402 CB CB . THR THR THR A A 190 190 . 39.263 61.828 23.270 1.00 17.39 1 .  
.  
ATOM 1403 OG1 OG1 . THR THR THR A A 190 190 . 37.962 62.330 23.391 1.00 20.46 1 .  
.  
ATOM 1404 CG2 CG2 . THR THR THR A A 190 190 . 40.299 62.921 23.743 1.00 20.75 1 .  
.  
ATOM 1405 C C . THR THR THR A A 190 190 . 40.941 60.981 21.536 1.00 17.25 1 .  
.  
ATOM 1406 O O . THR THR THR A A 190 190 . 41.842 61.670 21.022 1.00 19.10 1 .  
.  
ATOM 1407 N N . LEU LEU LEU A A 191 191 . 41.151 59.706 21.855 1.00 18.43 1 .  
.  
ATOM 1408 CA CA . LEU LEU LEU A A 191 191 . 42.408 59.002 21.673 1.00 17.41 1 .  
.  
ATOM 1409 CB CB . LEU LEU LEU A A 191 191 . 42.311 57.556 22.152 1.00 17.69 1 .  
.  
ATOM 1410 CG CG . LEU LEU LEU A A 191 191 . 43.571 56.695 22.003 1.00 16.50 1 .  
.  
ATOM 1411 CD1 CD1 . LEU LEU LEU A A 191 191 . 44.906 57.311 22.679 1.00 17.35 1 .  
.  
ATOM 1412 CD2 CD2 . LEU LEU LEU A A 191 191 . 43.324 55.209 22.516 1.00 19.25 1 .  
.  
ATOM 1413 C C . LEU LEU LEU A A 191 191 . 42.842 59.030 20.211 1.00 17.16 1 .  
.  
ATOM 1414 O O . LEU LEU LEU A A 191 191 . 44.029 59.185 19.899 1.00 17.81 1 .  
.  
ATOM 1415 N N . LYS LYS LYS A A 192 192 . 41.897 58.869 19.311 1.00 17.11 1 .  
.  
ATOM 1416 CA CA . LYS LYS LYS A A 192 192 . 42.263 58.938 17.848 1.00 17.99 1 .  
.  
ATOM 1417 CB CB . LYS LYS LYS A A 192 192 . 41.028 58.753 16.931 1.00 18.26 1 .  
.  
ATOM 1418 CG CG . LYS LYS LYS A A 192 192 . 41.484 58.398 15.497 1.00 20.27 1 .  
.  
ATOM 1419 CD CD . LYS LYS LYS A A 192 192 . 40.238 58.095 14.635 1.00 23.42 1 .  
.  
ATOM 1420 CE CE . LYS LYS LYS A A 192 192 . 40.613 57.519 13.267 1.00 26.78 1 .  
.  
ATOM 1421 NZ NZ . LYS LYS LYS A A 192 192 . 39.362 57.504 12.349 1.00 23.95 1 .  
.  
ATOM 1422 C C . LYS LYS LYS A A 192 192 . 42.954 60.278 17.547 1.00 19.06 1 .  
.  
ATOM 1423 O O . LYS LYS LYS A A 192 192 . 43.906 60.333 16.752 1.00 19.35 1 .  
.  
ATOM 1424 N N . GLY GLY GLY A A 193 193 . 42.395 61.354 18.124 1.00 18.82 1 .  
.  
ATOM 1425 CA CA . GLY GLY GLY A A 193 193 . 42.889 62.719 17.824 1.00 20.04 1 .  
.  
ATOM 1426 C C . GLY GLY GLY A A 193 193 . 44.208 62.948 18.547 1.00 19.55 1 .  
.  
ATOM 1427 O O . GLY GLY GLY A A 193 193 . 45.139 63.544 17.976 1.00 21.22 1 .  
.  
ATOM 1428 N N . VAL VAL VAL A A 194 194 . 44.343 62.382 19.746 1.00 18.91 1 .  
.  
.





ATOM 1459 O O . ASP ASP ASP A A 197 197 . 50.604 65.382 16.407 1.00 29.49 1 .  
.  
ATOM 1460 N N . LYS LYS LYS A A 198 198 . 49.939 63.569 17.503 1.00 27.97 1 .  
.  
ATOM 1461 CA CA . LYS LYS LYS A A 198 198 . 51.277 63.239 17.844 1.00 28.83 1 .  
.  
ATOM 1462 CB CB . LYS LYS LYS A A 198 198 . 51.271 62.428 19.118 1.00 29.09 1 .  
.  
ATOM 1463 CG CG . LYS LYS LYS A A 198 198 . 52.596 62.280 19.712 1.00 31.35 1 .  
.  
ATOM 1464 CD CD . LYS LYS LYS A A 198 198 . 52.474 62.006 21.156 1.00 34.50 1 .  
.  
ATOM 1465 CE CE . LYS LYS LYS A A 198 198 . 53.879 62.086 21.771 1.00 35.68 1 .  
.  
ATOM 1466 NZ NZ . LYS LYS LYS A A 198 198 . 53.969 61.240 23.006 1.00 35.89 1 .  
.  
ATOM 1467 C C . LYS LYS LYS A A 198 198 . 52.061 62.486 16.777 1.00 30.10 1 .  
.  
ATOM 1468 O O . LYS LYS LYS A A 198 198 . 53.301 62.705 16.594 1.00 30.93 1 .  
.  
ATOM 1469 N N . TYR TYR TYR A A 199 199 . 51.405 61.547 16.107 1.00 27.75 1 .  
.  
ATOM 1470 CA CA . TYR TYR TYR A A 199 199 . 52.136 60.572 15.323 1.00 28.66 1 .  
.  
ATOM 1471 CB CB . TYR TYR TYR A A 199 199 . 51.901 59.118 15.811 1.00 26.74 1 .  
.  
ATOM 1472 CG CG . TYR TYR TYR A A 199 199 . 52.485 58.830 17.126 1.00 29.18 1 .  
.  
ATOM 1473 CD1 CD1 . TYR TYR TYR A A 199 199 . 51.696 58.749 18.267 1.00 25.93 1 .  
.  
ATOM 1474 CE1 CE1 . TYR TYR TYR A A 199 199 . 52.271 58.465 19.509 1.00 29.39 1 .  
.  
ATOM 1475 CZ CZ . TYR TYR TYR A A 199 199 . 53.636 58.353 19.613 1.00 30.06 1 .  
.  
ATOM 1476 OH OH . TYR TYR TYR A A 199 199 . 54.228 58.128 20.831 1.00 33.43 1 .  
.  
ATOM 1477 CE2 CE2 . TYR TYR TYR A A 199 199 . 54.448 58.455 18.507 1.00 32.88 1 .  
.  
ATOM 1478 CD2 CD2 . TYR TYR TYR A A 199 199 . 53.883 58.686 17.269 1.00 31.23 1 .  
.  
ATOM 1479 C C . TYR TYR TYR A A 199 199 . 51.687 60.670 13.859 1.00 29.55 1 .  
.  
ATOM 1480 O O . TYR TYR TYR A A 199 199 . 52.289 60.000 13.014 1.00 32.92 1 .  
.  
ATOM 1481 N N . GLY GLY GLY A A 200 200 . 50.683 61.486 13.548 1.00 29.70 1 .  
.  
ATOM 1482 CA CA . GLY GLY GLY A A 200 200 . 50.209 61.664 12.152 1.00 28.13 1 .  
.  
ATOM 1483 C C . GLY GLY GLY A A 200 200 . 48.922 60.818 11.868 1.00 27.70 1 .  
.  
ATOM 1484 O O . GLY GLY GLY A A 200 200 . 48.658 59.840 12.603 1.00 25.85 1 .  
.  
ATOM 1485 N N . LYS LYS LYS A A 201 201 . 48.166 61.152 10.802 1.00 27.71 1 .  
.  
ATOM 1486 CA CA . LYS LYS LYS A A 201 201 . 46.957 60.368 10.489 1.00 28.23 1 .  
.  
ATOM 1487 CB CB . LYS LYS LYS A A 201 201 . 46.112 60.996 9.353 1.00 31.11 1 .  
.  
ATOM 1488 CG CG . LYS LYS LYS A A 201 201 . 44.541 60.667 9.436 1.00 35.28 1 .  
.





ATOM 1549 O O . GLU GLU GLU A A 209 209 . 38.992 45.886 18.948 1.00 13.12 1 .  
.ATOM 1550 N N . GLY GLY GLY A A 210 210 . 40.149 46.311 17.046 1.00 11.84 1 .  
.ATOM 1551 CA CA . GLY GLY GLY A A 210 210 . 39.574 47.651 16.838 1.00 12.96 1 .  
.ATOM 1552 C C . GLY GLY GLY A A 210 210 . 40.372 48.774 17.522 1.00 12.17 1 .  
.ATOM 1553 O O . GLY GLY GLY A A 210 210 . 39.976 49.929 17.423 1.00 15.02 1 .  
.ATOM 1554 N N . GLY GLY GLY A A 211 211 . 41.383 48.421 18.294 1.00 14.00 1 .  
.ATOM 1555 CA CA . GLY GLY GLY A A 211 211 . 42.174 49.454 19.002 1.00 13.30 1 .  
.ATOM 1556 C C . GLY GLY GLY A A 211 211 . 43.178 50.051 18.050 1.00 15.68 1 .  
.ATOM 1557 O O . GLY GLY GLY A A 211 211 . 43.632 49.373 17.052 1.00 16.29 1 .  
.ATOM 1558 N N . PHE PHE PHE A A 212 212 . 43.541 51.323 18.284 1.00 17.09 1 .  
.ATOM 1559 CA CA . PHE PHE PHE A A 212 212 . 44.465 51.930 17.332 1.00 17.41 1 .  
.ATOM 1560 CB CB . PHE PHE PHE A A 212 212 . 44.635 53.376 17.682 1.00 16.62 1 .  
.ATOM 1561 CG CG . PHE PHE PHE A A 212 212 . 43.361 54.104 17.619 1.00 20.06 1 .  
.ATOM 1562 CD1 CD1 . PHE PHE PHE A A 212 212 . 42.725 54.506 18.795 1.00 17.47 1 .  
.ATOM 1563 CE1 CE1 . PHE PHE PHE A A 212 212 . 41.530 55.198 18.729 1.00 19.90 1 .  
.ATOM 1564 CZ CZ . PHE PHE PHE A A 212 212 . 40.893 55.427 17.460 1.00 20.18 1 .  
.ATOM 1565 CE2 CE2 . PHE PHE PHE A A 212 212 . 41.517 55.004 16.260 1.00 20.40 1 .  
.ATOM 1566 CD2 CD2 . PHE PHE PHE A A 212 212 . 42.718 54.299 16.357 1.00 15.69 1 .  
.ATOM 1567 C C . PHE PHE PHE A A 212 212 . 45.796 51.242 17.430 1.00 18.09 1 .  
.ATOM 1568 O O . PHE PHE PHE A A 212 212 . 46.207 50.671 18.458 1.00 20.23 1 .  
.ATOM 1569 N N . ALA ALA ALA A A 213 213 . 46.500 51.261 16.288 1.00 20.58 1 .  
.ATOM 1570 CA CA . ALA ALA ALA A A 213 213 . 47.756 50.538 16.203 1.00 21.54 1 .  
.ATOM 1571 CB CB . ALA ALA ALA A A 213 213 . 47.569 49.429 15.175 1.00 23.43 1 .  
.ATOM 1572 C C . ALA ALA ALA A A 213 213 . 48.917 51.472 15.782 1.00 24.08 1 .  
.ATOM 1573 O O . ALA ALA ALA A A 213 213 . 49.636 51.155 14.857 1.00 23.67 1 .  
.ATOM 1574 N N . PRO PRO PRO A A 214 214 . 49.140 52.556 16.531 1.00 22.38 1 .  
.ATOM 1575 CA CA . PRO PRO PRO A A 214 214 . 50.290 53.475 16.240 1.00 24.78 1 .  
.ATOM 1576 CB CB . PRO PRO PRO A A 214 214 . 50.220 54.501 17.381 1.00 24.80 1 .  
.ATOM 1577 CG CG . PRO PRO PRO A A 214 214 . 49.627 53.604 18.568 1.00 23.01 1 .  
.ATOM 1578 CD CD . PRO PRO PRO A A 214 214 . 48.567 52.779 17.899 1.00 23.90 1 .  
.







ATOM 1669 CA CA . LYS LYS LYS A A 227 227 . 45.837 58.439 30.274 1.00 22.06 1 .  
.  
ATOM 1670 CB CB . LYS LYS LYS A A 227 227 . 47.049 58.430 31.240 1.00 23.13 1 .  
.  
ATOM 1671 CG CG . LYS LYS LYS A A 227 227 . 46.829 59.201 32.565 1.00 27.21 1 .  
.  
ATOM 1672 CD CD . LYS LYS LYS A A 227 227 . 45.303 59.045 32.999 1.00 36.75 1 .  
.  
ATOM 1673 CE CE . LYS LYS LYS A A 227 227 . 44.915 59.739 34.334 1.00 42.09 1 .  
.  
ATOM 1674 NZ NZ . LYS LYS LYS A A 227 227 . 46.109 59.998 35.201 1.00 45.50 1 .  
.  
ATOM 1675 C C . LYS LYS LYS A A 227 227 . 45.518 59.812 29.754 1.00 21.05 1 .  
.  
ATOM 1676 O O . LYS LYS LYS A A 227 227 . 44.567 60.431 30.185 1.00 20.14 1 .  
.  
ATOM 1677 N N . GLU GLU GLU A A 228 228 . 46.294 60.277 28.741 1.00 22.42 1 .  
.  
ATOM 1678 CA CA . GLU GLU GLU A A 228 228 . 45.990 61.570 28.028 1.00 21.26 1 .  
.  
ATOM 1679 CB CB . GLU GLU GLU A A 228 228 . 47.085 61.960 26.950 1.00 23.18 1 .  
.  
ATOM 1680 C C . GLU GLU GLU A A 228 228 . 44.587 61.673 27.459 1.00 21.79 1 .  
.  
ATOM 1681 O O . GLU GLU GLU A A 228 228 . 43.888 62.682 27.652 1.00 22.25 1 .  
.  
ATOM 1682 N N . ALA ALA ALA A A 229 229 . 44.138 60.613 26.734 1.00 21.43 1 .  
.  
ATOM 1683 CA CA . ALA ALA ALA A A 229 229 . 42.813 60.668 26.134 1.00 20.78 1 .  
.  
ATOM 1684 CB CB . ALA ALA ALA A A 229 229 . 42.631 59.474 25.215 1.00 20.58 1 .  
.  
ATOM 1685 C C . ALA ALA ALA A A 229 229 . 41.696 60.655 27.237 1.00 18.60 1 .  
.  
ATOM 1686 O O . ALA ALA ALA A A 229 229 . 40.705 61.335 27.094 1.00 19.64 1 .  
.  
ATOM 1687 N N . ILE ILE ILE A A 230 230 . 41.894 59.879 28.302 1.00 18.74 1 .  
.  
ATOM 1688 CA CA . ILE ILE ILE A A 230 230 . 40.922 59.845 29.438 1.00 18.47 1 .  
.  
ATOM 1689 CB CB . ILE ILE ILE A A 230 230 . 41.348 58.907 30.559 1.00 16.41 1 .  
.  
ATOM 1690 CG1 CG1 . ILE ILE ILE A A 230 230 . 41.261 57.443 30.104 1.00 16.25 1 .  
.  
ATOM 1691 CD CD . ILE ILE ILE A A 230 230 . 41.850 56.421 31.045 1.00 20.09 1 .  
.  
ATOM 1692 CG2 CG2 . ILE ILE ILE A A 230 230 . 40.491 59.195 31.849 1.00 20.54 1 .  
.  
ATOM 1693 C C . ILE ILE ILE A A 230 230 . 40.750 61.273 30.034 1.00 18.91 1 .  
.  
ATOM 1694 O O . ILE ILE ILE A A 230 230 . 39.614 61.796 30.164 1.00 18.81 1 .  
.  
ATOM 1695 N N . ASP ASP ASP A A 231 231 . 41.908 61.919 30.290 1.00 21.36 1 .  
.  
ATOM 1696 CA CA . ASP ASP ASP A A 231 231 . 41.939 63.287 30.851 1.00 23.36 1 .  
.  
ATOM 1697 CB CB . ASP ASP ASP A A 231 231 . 43.353 63.631 31.250 1.00 24.75 1 .  
.  
ATOM 1698 CG CG . ASP ASP ASP A A 231 231 . 43.945 62.671 32.321 1.00 31.87 1 .  
.  
.

















































ATOM 2329 O O . VAL VAL VAL A A 310 310 . 48.567 42.830 45.511 1.00 28.00 1 .  
.  
ATOM 2330 N N . GLY GLY GLY A A 311 311 . 48.277 44.969 44.890 1.00 25.48 1 .  
.  
ATOM 2331 CA CA . GLY GLY GLY A A 311 311 . 46.916 45.057 45.443 1.00 25.42 1 .  
.  
ATOM 2332 C C . GLY GLY GLY A A 311 311 . 45.912 45.166 44.307 1.00 24.93 1 .  
.  
ATOM 2333 O O . GLY GLY GLY A A 311 311 . 44.740 45.520 44.531 1.00 25.62 1 .  
.  
ATOM 2334 N N . ILE ILE ILE A A 312 312 . 46.361 44.842 43.095 1.00 22.99 1 .  
.  
ATOM 2335 CA CA . ILE ILE ILE A A 312 312 . 45.447 44.925 41.910 1.00 20.56 1 .  
.  
ATOM 2336 CB CB . ILE ILE ILE A A 312 312 . 46.095 45.682 40.750 1.00 19.24 1 .  
.  
ATOM 2337 CG1 CG1 . ILE ILE ILE A A 312 312 . 47.293 44.898 40.167 1.00 20.70 1 .  
.  
ATOM 2338 CD CD . ILE ILE ILE A A 312 312 . 47.670 45.461 38.726 1.00 21.88 1 .  
.  
ATOM 2339 CG2 CG2 . ILE ILE ILE A A 312 312 . 46.413 47.131 41.181 1.00 20.38 1 .  
.  
ATOM 2340 C C . ILE ILE ILE A A 312 312 . 44.960 43.581 41.423 1.00 19.16 1 .  
.  
ATOM 2341 O O . ILE ILE ILE A A 312 312 . 45.314 42.511 41.962 1.00 18.61 1 .  
.  
ATOM 2342 N N . GLN GLN GLN A A 313 313 . 44.048 43.634 40.430 1.00 18.18 1 .  
.  
ATOM 2343 CA CA . GLN GLN GLN A A 313 313 . 43.530 42.370 39.859 1.00 16.95 1 .  
.  
ATOM 2344 CB CB . GLN GLN GLN A A 313 313 . 42.253 42.665 39.037 1.00 15.83 1 .  
.  
ATOM 2345 CG CG . GLN GLN GLN A A 313 313 . 41.789 41.451 38.223 1.00 16.29 1 .  
.  
ATOM 2346 CD CD . GLN GLN GLN A A 313 313 . 40.331 41.640 37.797 1.00 17.60 1 .  
.  
ATOM 2347 OE1 OE1 . GLN GLN GLN A A 313 313 . 39.424 41.273 38.561 1.00 16.69 1 .  
.  
ATOM 2348 NE2 NE2 . GLN GLN GLN A A 313 313 . 40.103 42.237 36.617 1.00 15.61 1 .  
.  
ATOM 2349 C C . GLN GLN GLN A A 313 313 . 44.616 41.810 38.929 1.00 16.90 1 .  
.  
ATOM 2350 O O . GLN GLN GLN A A 313 313 . 45.193 42.579 38.148 1.00 18.50 1 .  
.  
ATOM 2351 N N . ILE ILE ILE A A 314 314 . 44.847 40.514 39.023 1.00 17.55 1 .  
.  
ATOM 2352 CA CA . ILE ILE ILE A A 314 314 . 45.860 39.787 38.197 1.00 16.37 1 .  
.  
ATOM 2353 CB CB . ILE ILE ILE A A 314 314 . 46.988 39.185 39.043 1.00 19.38 1 .  
.  
ATOM 2354 CG1 CG1 . ILE ILE ILE A A 314 314 . 47.766 40.352 39.743 1.00 20.00 1 .  
.  
ATOM 2355 CD CD . ILE ILE ILE A A 314 314 . 48.393 41.507 38.734 1.00 18.47 1 .  
.  
ATOM 2356 CG2 CG2 . ILE ILE ILE A A 314 314 . 47.887 38.244 38.178 1.00 18.66 1 .  
.  
ATOM 2357 C C . ILE ILE ILE A A 314 314 . 45.042 38.678 37.551 1.00 15.96 1 .  
.  
ATOM 2358 O O . ILE ILE ILE A A 314 314 . 44.459 37.834 38.207 1.00 15.57 1 .  
.  
.













ATOM 2509 C C . LYS LYS LYS A A 334 334 . 48.342 32.528 43.406 1.00 27.18 1 .  
.  
ATOM 2510 O O . LYS LYS LYS A A 334 334 . 48.968 33.588 43.585 1.00 27.07 1 .  
.  
ATOM 2511 N N . ALA ALA ALA A A 335 335 . 48.193 31.951 42.202 1.00 24.92 1 .  
.  
ATOM 2512 CA CA . ALA ALA ALA A A 335 335 . 48.890 32.506 41.044 1.00 24.94 1 .  
.  
ATOM 2513 CB CB . ALA ALA ALA A A 335 335 . 48.945 31.537 39.941 1.00 25.00 1 .  
.  
ATOM 2514 C C . ALA ALA ALA A A 335 335 . 48.300 33.800 40.562 1.00 24.54 1 .  
.  
ATOM 2515 O O . ALA ALA ALA A A 335 335 . 49.016 34.634 39.975 1.00 24.90 1 .  
.  
ATOM 2516 N N . CYS CYS CYS A A 336 336 . 47.001 33.994 40.790 1.00 22.77 1 .  
.  
ATOM 2517 CA CA . CYS CYS CYS A A 336 336 . 46.325 35.172 40.229 1.00 22.13 1 .  
.  
ATOM 2518 CB CB . CYS CYS CYS A A 336 336 . 45.979 34.966 38.697 1.00 20.70 1 .  
.  
ATOM 2519 SG SG . CYS CYS CYS A A 336 336 . 45.044 33.359 38.342 1.00 24.23 1 .  
.  
ATOM 2520 C C . CYS CYS CYS A A 336 336 . 45.040 35.221 41.007 1.00 20.95 1 .  
.  
ATOM 2521 O O . CYS CYS CYS A A 336 336 . 44.805 34.346 41.891 1.00 23.51 1 .  
.  
ATOM 2522 N N . ASN ASN ASN A A 337 337 . 44.204 36.220 40.723 1.00 19.41 1 .  
.  
ATOM 2523 CA CA . ASN ASN ASN A A 337 337 . 42.980 36.366 41.509 1.00 17.88 1 .  
.  
ATOM 2524 CB CB . ASN ASN ASN A A 337 337 . 43.158 37.494 42.559 1.00 19.29 1 .  
.  
ATOM 2525 CG CG . ASN ASN ASN A A 337 337 . 43.653 38.832 41.964 1.00 20.47 1 .  
.  
ATOM 2526 OD1 OD1 . ASN ASN ASN A A 337 337 . 44.555 39.526 42.528 1.00 26.37 1 .  
.  
ATOM 2527 ND2 ND2 . ASN ASN ASN A A 337 337 . 43.079 39.230 40.888 1.00 15.20 1 .  
.  
ATOM 2528 C C . ASN ASN ASN A A 337 337 . 41.755 36.633 40.631 1.00 18.10 1 .  
.  
ATOM 2529 O O . ASN ASN ASN A A 337 337 . 40.719 37.111 41.121 1.00 17.40 1 .  
.  
ATOM 2530 N N . CYS CYS CYS A A 338 338 . 41.881 36.364 39.326 1.00 17.05 1 .  
.  
ATOM 2531 CA CA . CYS CYS CYS A A 338 338 . 40.726 36.532 38.456 1.00 16.19 1 .  
.  
ATOM 2532 CB CB . CYS CYS CYS A A 338 338 . 40.727 37.984 37.939 1.00 15.78 1 .  
.  
ATOM 2533 SG SG . CYS CYS CYS A A 338 338 . 39.348 38.410 36.785 1.00 17.59 1 .  
.  
ATOM 2534 C C . CYS CYS CYS A A 338 338 . 40.918 35.571 37.289 1.00 15.43 1 .  
.  
ATOM 2535 O O . CYS CYS CYS A A 338 338 . 42.038 35.371 36.858 1.00 15.12 1 .  
.  
ATOM 2536 N N . LEU LEU LEU A A 339 339 . 39.834 35.014 36.783 1.00 14.44 1 .  
.  
ATOM 2537 CA CA . LEU LEU LEU A A 339 339 . 39.839 34.098 35.643 1.00 13.49 1 .  
.  
ATOM 2538 CB CB . LEU LEU LEU A A 339 339 . 38.860 32.932 35.980 1.00 13.96 1 .  
.





ATOM 2599 C C . ILE ILE ILE A A 346 346 . 36.575 23.815 26.283 1.00 15.24 1 .  
.  
ATOM 2600 O O . ILE ILE ILE A A 346 346 . 36.704 22.591 26.227 1.00 16.04 1 .  
.  
ATOM 2601 N N . GLY GLY GLY A A 347 347 . 35.693 24.485 25.524 1.00 14.80 1 .  
.  
ATOM 2602 CA CA . GLY GLY GLY A A 347 347 . 34.958 23.865 24.429 1.00 12.68 1 .  
.  
ATOM 2603 C C . GLY GLY GLY A A 347 347 . 33.509 23.524 24.706 1.00 13.23 1 .  
.  
ATOM 2604 O O . GLY GLY GLY A A 347 347 . 32.858 22.875 23.882 1.00 15.08 1 .  
.  
ATOM 2605 N N . SER SER SER A A 348 348 . 32.974 23.914 25.838 1.00 12.99 1 .  
.  
ATOM 2606 CA CA . SER SER SER A A 348 348 . 31.535 23.752 26.079 1.00 13.60 1 .  
.  
ATOM 2607 CB CB . SER SER SER A A 348 348 . 31.194 22.317 26.535 1.00 15.78 1 .  
.  
ATOM 2608 OG OG . SER SER SER A A 348 348 . 31.588 22.081 27.931 1.00 18.38 1 .  
.  
ATOM 2609 C C . SER SER SER A A 348 348 . 30.992 24.782 27.051 1.00 12.95 1 .  
.  
ATOM 2610 O O . SER SER SER A A 348 348 . 31.729 25.306 27.907 1.00 15.67 1 .  
.  
ATOM 2611 N N . VAL VAL VAL A A 349 349 . 29.716 25.065 26.936 1.00 12.58 1 .  
.  
ATOM 2612 CA CA . VAL VAL VAL A A 349 349 . 29.046 26.040 27.811 1.00 12.87 1 .  
.  
ATOM 2613 CB CB . VAL VAL VAL A A 349 349 . 27.617 26.289 27.358 1.00 16.14 1 .  
.  
ATOM 2614 CG1 CG1 . VAL VAL VAL A A 349 349 . 26.884 27.125 28.401 1.00 15.54 1 .  
.  
ATOM 2615 CG2 CG2 . VAL VAL VAL A A 349 349 . 27.585 27.061 26.067 1.00 13.50 1 .  
.  
ATOM 2616 C C . VAL VAL VAL A A 349 349 . 29.050 25.501 29.269 1.00 15.35 1 .  
.  
ATOM 2617 O O . VAL VAL VAL A A 349 349 . 29.425 26.218 30.219 1.00 13.74 1 .  
.  
ATOM 2618 N N . THR THR THR A A 350 350 . 28.747 24.224 29.440 1.00 14.20 1 .  
.  
ATOM 2619 CA CA . THR THR THR A A 350 350 . 28.712 23.634 30.788 1.00 15.16 1 .  
.  
ATOM 2620 CB CB . THR THR THR A A 350 350 . 28.366 22.129 30.725 1.00 15.64 1 .  
.  
ATOM 2621 OG1 OG1 . THR THR THR A A 350 350 . 27.014 22.004 30.305 1.00 17.29 1 .  
.  
ATOM 2622 CG2 CG2 . THR THR THR A A 350 350 . 28.434 21.547 32.133 1.00 18.89 1 .  
.  
ATOM 2623 C C . THR THR THR A A 350 350 . 30.081 23.726 31.454 1.00 15.58 1 .  
.  
ATOM 2624 O O . THR THR THR A A 350 350 . 30.182 24.167 32.626 1.00 16.20 1 .  
.  
ATOM 2625 N N . GLU GLU GLU A A 351 351 . 31.137 23.357 30.736 1.00 15.48 1 .  
.  
ATOM 2626 CA CA . GLU GLU GLU A A 351 351 . 32.484 23.443 31.360 1.00 15.57 1 .  
.  
ATOM 2627 CB CB . GLU GLU GLU A A 351 351 . 33.550 22.812 30.463 1.00 16.98 1 .  
.  
ATOM 2628 CG CG . GLU GLU GLU A A 351 351 . 33.415 21.280 30.418 1.00 17.99 1 .  
.





ATOM 2659 C C . ALA ALA ALA A A 355 355 . 34.808 28.415 36.204 1.00 16.40 1 .  
.ATOM 2660 O O . ALA ALA ALA A A 355 355 . 35.500 28.759 37.184 1.00 16.79 1 .  
.ATOM 2661 N N . CYS CYS CYS A A 356 356 . 33.781 29.151 35.749 1.00 15.44 1 .  
.ATOM 2662 CA CA . CYS CYS CYS A A 356 356 . 33.350 30.404 36.386 1.00 14.87 1 .  
.ATOM 2663 CB CB . CYS CYS CYS A A 356 356 . 32.137 30.961 35.625 1.00 14.64 1 .  
.ATOM 2664 SG SG . CYS CYS CYS A A 356 356 . 31.630 32.532 36.282 1.00 17.64 1 .  
.ATOM 2665 C C . CYS CYS CYS A A 356 356 . 32.987 30.169 37.869 1.00 17.37 1 .  
.ATOM 2666 O O . CYS CYS CYS A A 356 356 . 33.523 30.866 38.784 1.00 17.15 1 .  
.ATOM 2667 N N . LYS LYS LYS A A 357 357 . 32.195 29.148 38.129 1.00 16.66 1 .  
.ATOM 2668 CA CA . LYS LYS LYS A A 357 357 . 31.693 28.957 39.535 1.00 19.11 1 .  
.ATOM 2669 CB CB . LYS LYS LYS A A 357 357 . 30.608 27.939 39.555 1.00 20.31 1 .  
.ATOM 2670 CG CG . LYS LYS LYS A A 357 357 . 29.314 28.471 38.829 1.00 24.64 1 .  
.ATOM 2671 CD CD . LYS LYS LYS A A 357 357 . 28.186 27.455 38.820 1.00 30.17 1 .  
.ATOM 2672 CE CE . LYS LYS LYS A A 357 357 . 27.755 27.202 40.245 1.00 35.14 1 .  
.ATOM 2673 NZ NZ . LYS LYS LYS A A 357 357 . 26.591 26.298 40.346 1.00 37.34 1 .  
.ATOM 2674 C C . LYS LYS LYS A A 357 357 . 32.865 28.526 40.445 1.00 19.18 1 .  
.ATOM 2675 O O . LYS LYS LYS A A 357 357 . 32.968 28.997 41.606 1.00 19.38 1 .  
.ATOM 2676 N N . LEU LEU LEU A A 358 358 . 33.774 27.707 39.908 1.00 19.06 1 .  
.ATOM 2677 CA CA . LEU LEU LEU A A 358 358 . 35.006 27.342 40.635 1.00 19.63 1 .  
.ATOM 2678 CB CB . LEU LEU LEU A A 358 358 . 35.849 26.307 39.845 1.00 20.67 1 .  
.ATOM 2679 CG CG . LEU LEU LEU A A 358 358 . 37.224 25.910 40.421 1.00 21.89 1 .  
.ATOM 2680 CD1 CD1 . LEU LEU LEU A A 358 358 . 36.972 25.268 41.803 1.00 25.25 1 .  
.ATOM 2681 CD2 CD2 . LEU LEU LEU A A 358 358 . 37.973 24.973 39.492 1.00 25.24 1 .  
.ATOM 2682 C C . LEU LEU LEU A A 358 358 . 35.838 28.572 40.980 1.00 19.98 1 .  
.ATOM 2683 O O . LEU LEU LEU A A 358 358 . 36.232 28.756 42.166 1.00 21.46 1 .  
.ATOM 2684 N N . ALA ALA ALA A A 359 359 . 36.056 29.487 40.025 1.00 17.87 1 .  
.ATOM 2685 CA CA . ALA ALA ALA A A 359 359 . 36.744 30.734 40.375 1.00 17.34 1 .  
.ATOM 2686 CB CB . ALA ALA ALA A A 359 359 . 36.953 31.586 39.098 1.00 15.38 1 .  
.ATOM 2687 C C . ALA ALA ALA A A 359 359 . 35.962 31.544 41.463 1.00 18.37 1 .  
.ATOM 2688 O O . ALA ALA ALA A A 359 359 . 36.565 32.017 42.446 1.00 17.70 1 .  
.



ATOM 2719 N N . TRP TRP TRP A A 364 364 . 37.830 34.546 43.499 1.00 19.82 1 .  
.  
ATOM 2720 CA CA . TRP TRP TRP A A 364 364 . 38.379 35.260 42.348 1.00 18.81 1 .  
.  
ATOM 2721 CB CB . TRP TRP TRP A A 364 364 . 38.899 34.258 41.340 1.00 18.06 1 .  
.  
ATOM 2722 CG CG . TRP TRP TRP A A 364 364 . 40.148 33.519 41.675 1.00 20.72 1 .  
.  
ATOM 2723 CD1 CD1 . TRP TRP TRP A A 364 364 . 40.818 33.405 42.897 1.00 22.06 1 .  
.  
ATOM 2724 NE1 NE1 . TRP TRP TRP A A 364 364 . 41.924 32.567 42.733 1.00 22.02 1 .  
.  
ATOM 2725 CE2 CE2 . TRP TRP TRP A A 364 364 . 42.018 32.224 41.393 1.00 21.30 1 .  
.  
ATOM 2726 CD2 CD2 . TRP TRP TRP A A 364 364 . 40.898 32.795 40.725 1.00 21.67 1 .  
.  
ATOM 2727 CE3 CE3 . TRP TRP TRP A A 364 364 . 40.722 32.570 39.339 1.00 20.80 1 .  
.  
ATOM 2728 CZ3 CZ3 . TRP TRP TRP A A 364 364 . 41.595 31.836 38.693 1.00 19.40 1 .  
.  
ATOM 2729 CH2 CH2 . TRP TRP TRP A A 364 364 . 42.719 31.259 39.364 1.00 23.01 1 .  
.  
ATOM 2730 CZ2 CZ2 . TRP TRP TRP A A 364 364 . 42.946 31.450 40.719 1.00 23.85 1 .  
.  
ATOM 2731 C C . TRP TRP TRP A A 364 364 . 37.331 36.032 41.587 1.00 17.90 1 .  
.  
ATOM 2732 O O . TRP TRP TRP A A 364 364 . 36.153 35.736 41.693 1.00 18.55 1 .  
.  
ATOM 2733 N N . GLY GLY GLY A A 365 365 . 37.774 37.077 40.897 1.00 16.87 1 .  
.  
ATOM 2734 CA CA . GLY GLY GLY A A 365 365 . 36.947 37.739 39.861 1.00 15.80 1 .  
.  
ATOM 2735 C C . GLY GLY GLY A A 365 365 . 36.882 36.871 38.647 1.00 14.17 1 .  
.  
ATOM 2736 O O . GLY GLY GLY A A 365 365 . 37.648 35.894 38.509 1.00 14.58 1 .  
.  
ATOM 2737 N N . VAL VAL VAL A A 366 366 . 35.956 37.191 37.749 1.00 13.29 1 .  
.  
ATOM 2738 CA CA . VAL VAL VAL A A 366 366 . 35.915 36.457 36.475 1.00 14.00 1 .  
.  
ATOM 2739 CB CB . VAL VAL VAL A A 366 366 . 34.736 35.414 36.429 1.00 12.65 1 .  
.  
ATOM 2740 CG1 CG1 . VAL VAL VAL A A 366 366 . 34.633 34.725 34.997 1.00 15.37 1 .  
.  
ATOM 2741 CG2 CG2 . VAL VAL VAL A A 366 366 . 34.946 34.258 37.489 1.00 13.23 1 .  
.  
ATOM 2742 C C . VAL VAL VAL A A 366 366 . 35.628 37.532 35.448 1.00 13.91 1 .  
.  
ATOM 2743 O O . VAL VAL VAL A A 366 366 . 34.731 38.364 35.646 1.00 14.18 1 .  
.  
ATOM 2744 N N . MET MET MET A A 367 367 . 36.463 37.587 34.389 1.00 13.03 1 .  
.  
ATOM 2745 CA CA . MET MET MET A A 367 367 . 36.206 38.545 33.309 1.00 12.41 1 .  
.  
ATOM 2746 CB CB . MET MET MET A A 367 367 . 37.416 39.438 33.086 1.00 13.76 1 .  
.  
ATOM 2747 CG CG . MET MET MET A A 367 367 . 37.226 40.325 31.868 1.00 12.34 1 .  
.  
ATOM 2748 SD SD . MET MET MET A A 367 367 . 38.637 41.382 31.494 1.00 17.32 1 .  
.



ATOM 2779 CD CD . ARG ARG ARG A A 371 371 . 39.133 33.434 22.491 1.00 13.57 1 .  
.  
ATOM 2780 NE NE . ARG ARG ARG A A 371 371 . 40.598 33.364 22.363 1.00 13.50 1 .  
.  
ATOM 2781 CZ CZ . ARG ARG ARG A A 371 371 . 41.357 32.295 22.588 1.00 14.05 1 .  
.  
ATOM 2782 NH1 NH1 . ARG ARG ARG A A 371 371 . 40.779 31.085 22.831 1.00 12.75 1 .  
.  
ATOM 2783 NH2 NH2 . ARG ARG ARG A A 371 371 . 42.722 32.451 22.576 1.00 13.52 1 .  
.  
ATOM 2784 C C . ARG ARG ARG A A 371 371 . 39.047 37.112 20.061 1.00 9.80 1 .  
.  
ATOM 2785 O O . ARG ARG ARG A A 371 371 . 38.179 37.869 19.652 1.00 10.02 1 .  
.  
ATOM 2786 N N . SER SER SER A A 372 372 . 40.317 37.185 19.677 1.00 10.14 1 .  
.  
ATOM 2787 CA CA . SER SER SER A A 372 372 . 40.654 38.162 18.644 1.00 11.02 1 .  
.  
ATOM 2788 CB CB . SER SER SER A A 372 372 . 42.193 38.308 18.526 1.00 11.99 1 .  
.  
ATOM 2789 OG OG . SER SER SER A A 372 372 . 42.764 37.068 18.147 1.00 13.67 1 .  
.  
ATOM 2790 C C . SER SER SER A A 372 372 . 40.044 37.884 17.287 1.00 12.43 1 .  
.  
ATOM 2791 O O . SER SER SER A A 372 372 . 39.869 38.811 16.506 1.00 11.79 1 .  
.  
ATOM 2792 N N . GLY GLY GLY A A 373 373 . 39.691 36.623 17.012 1.00 11.04 1 .  
.  
ATOM 2793 CA CA . GLY GLY GLY A A 373 373 . 38.903 36.309 15.755 1.00 10.82 1 .  
.  
ATOM 2794 C C . GLY GLY GLY A A 373 373 . 37.476 36.101 16.242 1.00 11.28 1 .  
.  
ATOM 2795 O O . GLY GLY GLY A A 373 373 . 37.182 35.129 16.959 1.00 13.82 1 .  
.  
ATOM 2796 N N . GLU GLU GLU A A 374 374 . 36.625 37.078 16.034 1.00 11.34 1 .  
.  
ATOM 2797 CA CA . GLU GLU GLU A A 374 374 . 35.276 37.015 16.543 1.00 10.88 1 .  
.  
ATOM 2798 CB CB . GLU GLU GLU A A 374 374 . 34.920 38.267 17.425 1.00 11.17 1 .  
.  
ATOM 2799 CG CG . GLU GLU GLU A A 374 374 . 35.107 37.983 18.919 1.00 11.60 1 .  
.  
ATOM 2800 CD CD . GLU GLU GLU A A 374 374 . 34.183 36.881 19.467 1.00 11.35 1 .  
.  
ATOM 2801 OE1 OE1 . GLU GLU GLU A A 374 374 . 33.083 36.600 18.908 1.00 13.47 1 .  
.  
ATOM 2802 OE2 OE2 . GLU GLU GLU A A 374 374 . 34.571 36.308 20.505 1.00 14.17 1 .  
.  
ATOM 2803 C C . GLU GLU GLU A A 374 374 . 34.284 36.904 15.386 1.00 9.96 1 .  
.  
ATOM 2804 O O . GLU GLU GLU A A 374 374 . 34.640 36.856 14.205 1.00 10.37 1 .  
.  
ATOM 2805 N N . THR THR THR A A 375 375 . 33.044 36.753 15.739 1.00 9.30 1 .  
.  
ATOM 2806 CA CA . THR THR THR A A 375 375 . 31.986 36.774 14.726 1.00 9.62 1 .  
.  
ATOM 2807 CB CB . THR THR THR A A 375 375 . 31.337 35.368 14.520 1.00 9.67 1 .  
.  
ATOM 2808 OG1 OG1 . THR THR THR A A 375 375 . 30.568 34.989 15.732 1.00 12.57 1 .  
.  
.

ATOM 2809 CG2 CG2 . THR THR THR A A 375 375 . 32.459 34.310 14.243 1.00 14.46 1 .  
.  
ATOM 2810 C C . THR THR THR A A 375 375 . 30.886 37.746 15.170 1.00 10.65 1 .  
.  
ATOM 2811 O O . THR THR THR A A 375 375 . 30.954 38.378 16.262 1.00 10.52 1 .  
.  
ATOM 2812 N N . GLU GLU GLU A A 376 376 . 29.813 37.771 14.368 1.00 12.99 1 .  
.  
ATOM 2813 CA CA . GLU GLU GLU A A 376 376 . 28.609 38.557 14.712 1.00 13.73 1 .  
.  
ATOM 2814 CB CB . GLU GLU GLU A A 376 376 . 27.757 38.795 13.400 1.00 14.72 1 .  
.  
ATOM 2815 CG CG . GLU GLU GLU A A 376 376 . 27.332 37.461 12.624 1.00 15.34 1 .  
.  
ATOM 2816 CD CD . GLU GLU GLU A A 376 376 . 28.313 37.019 11.557 1.00 16.38 1 .  
.  
ATOM 2817 OE1 OE1 . GLU GLU GLU A A 376 376 . 29.544 37.044 11.783 1.00 19.18 1 .  
.  
ATOM 2818 OE2 OE2 . GLU GLU GLU A A 376 376 . 27.890 36.529 10.497 1.00 12.82 1 .  
.  
ATOM 2819 C C . GLU GLU GLU A A 376 376 . 27.788 37.908 15.843 1.00 12.87 1 .  
.  
ATOM 2820 O O . GLU GLU GLU A A 376 376 . 26.774 38.515 16.288 1.00 13.76 1 .  
.  
ATOM 2821 N N . ASP ASP ASP A A 377 377 . 28.229 36.742 16.372 1.00 10.11 1 .  
.  
ATOM 2822 CA CA . ASP ASP ASP A A 377 377 . 27.499 36.095 17.502 1.00 11.39 1 .  
.  
ATOM 2823 CB CB . ASP ASP ASP A A 377 377 . 28.182 34.761 17.719 1.00 12.78 1 .  
.  
ATOM 2824 CG CG . ASP ASP ASP A A 377 377 . 27.574 33.970 18.818 1.00 17.11 1 .  
.  
ATOM 2825 OD1 OD1 . ASP ASP ASP A A 377 377 . 27.958 34.192 19.984 1.00 22.74 1 .  
.  
ATOM 2826 OD2 OD2 . ASP ASP ASP A A 377 377 . 26.901 32.980 18.518 1.00 18.57 1 .  
.  
ATOM 2827 C C . ASP ASP ASP A A 377 377 . 27.568 36.983 18.788 1.00 13.79 1 .  
.  
ATOM 2828 O O . ASP ASP ASP A A 377 377 . 28.631 37.607 19.049 1.00 14.70 1 .  
.  
ATOM 2829 N N . THR THR THR A A 378 378 . 26.525 37.046 19.583 1.00 11.71 1 .  
.  
ATOM 2830 CA CA . THR THR THR A A 378 378 . 26.583 37.906 20.748 1.00 11.06 1 .  
.  
ATOM 2831 CB CB . THR THR THR A A 378 378 . 25.501 39.005 20.718 1.00 11.41 1 .  
.  
ATOM 2832 OG1 OG1 . THR THR THR A A 378 378 . 24.218 38.399 20.691 1.00 13.20 1 .  
.  
ATOM 2833 CG2 CG2 . THR THR THR A A 378 378 . 25.669 39.893 19.453 1.00 13.25 1 .  
.  
ATOM 2834 C C . THR THR THR A A 378 378 . 26.417 37.105 22.026 1.00 10.18 1 .  
.  
ATOM 2835 O O . THR THR THR A A 378 378 . 26.146 37.708 23.114 1.00 11.91 1 .  
.  
ATOM 2836 N N . PHE PHE PHE A A 379 379 . 26.582 35.770 21.925 1.00 9.88 1 .  
.  
ATOM 2837 CA CA . PHE PHE PHE A A 379 379 . 26.381 34.915 23.131 1.00 10.94 1 .  
.  
ATOM 2838 CB CB . PHE PHE PHE A A 379 379 . 26.924 33.519 22.824 1.00 11.27 1 .  
.  
.















ATOM 3019 N N . ALA ALA ALA A A 404 404 . 28.732 44.355 18.353 1.00 9.79 1 .  
.  
ATOM 3020 CA CA . ALA ALA ALA A A 404 404 . 27.521 43.531 18.442 1.00 8.58 1 .  
.  
ATOM 3021 CB CB . ALA ALA ALA A A 404 404 . 27.632 42.341 17.466 1.00 9.77 1 .  
.  
ATOM 3022 C C . ALA ALA ALA A A 404 404 . 27.302 43.100 19.918 1.00 9.85 1 .  
.  
ATOM 3023 O O . ALA ALA ALA A A 404 404 . 26.166 43.096 20.389 1.00 9.82 1 .  
.  
ATOM 3024 N N . LYS LYS LYS A A 405 405 . 28.400 42.812 20.620 1.00 9.23 1 .  
.  
ATOM 3025 CA CA . LYS LYS LYS A A 405 405 . 28.263 42.383 22.047 1.00 9.26 1 .  
.  
ATOM 3026 CB CB . LYS LYS LYS A A 405 405 . 29.603 41.840 22.590 1.00 9.27 1 .  
.  
ATOM 3027 CG CG . LYS LYS LYS A A 405 405 . 29.913 40.370 22.201 1.00 10.45 1 .  
.  
ATOM 3028 CD CD . LYS LYS LYS A A 405 405 . 30.221 40.272 20.706 1.00 9.56 1 .  
.  
ATOM 3029 CE CE . LYS LYS LYS A A 405 405 . 31.029 38.956 20.446 1.00 10.94 1 .  
.  
ATOM 3030 NZ NZ . LYS LYS LYS A A 405 405 . 31.223 38.690 19.002 1.00 9.99 1 .  
.  
ATOM 3031 C C . LYS LYS LYS A A 405 405 . 27.871 43.613 22.881 1.00 9.78 1 .  
.  
ATOM 3032 O O . LYS LYS LYS A A 405 405 . 27.004 43.521 23.739 1.00 9.57 1 .  
.  
ATOM 3033 N N . TYR TYR TYR A A 406 406 . 28.572 44.738 22.712 1.00 11.21 1 .  
.  
ATOM 3034 CA CA . TYR TYR TYR A A 406 406 . 28.289 45.932 23.527 1.00 10.78 1 .  
.  
ATOM 3035 CB CB . TYR TYR TYR A A 406 406 . 29.271 47.056 23.216 1.00 10.27 1 .  
.  
ATOM 3036 CG CG . TYR TYR TYR A A 406 406 . 30.656 46.732 23.681 1.00 9.19 1 .  
.  
ATOM 3037 CD1 CD1 . TYR TYR TYR A A 406 406 . 30.905 46.306 24.978 1.00 9.64 1 .  
.  
ATOM 3038 CE1 CE1 . TYR TYR TYR A A 406 406 . 32.196 46.010 25.401 1.00 8.73 1 .  
.  
ATOM 3039 CZ CZ . TYR TYR TYR A A 406 406 . 33.303 46.110 24.507 1.00 9.60 1 .  
.  
ATOM 3040 OH OH . TYR TYR TYR A A 406 406 . 34.559 45.770 24.916 1.00 13.33 1 .  
.  
ATOM 3041 CE2 CE2 . TYR TYR TYR A A 406 406 . 33.069 46.496 23.178 1.00 9.30 1 .  
.  
ATOM 3042 CD2 CD2 . TYR TYR TYR A A 406 406 . 31.763 46.796 22.760 1.00 12.23 1 .  
.  
ATOM 3043 C C . TYR TYR TYR A A 406 406 . 26.861 46.407 23.282 1.00 11.58 1 .  
.  
ATOM 3044 O O . TYR TYR TYR A A 406 406 . 26.190 46.808 24.208 1.00 9.82 1 .  
.  
ATOM 3045 N N . ASN ASN ASN A A 407 407 . 26.424 46.374 22.028 1.00 8.82 1 .  
.  
ATOM 3046 CA CA . ASN ASN ASN A A 407 407 . 25.052 46.754 21.734 1.00 10.09 1 .  
.  
ATOM 3047 CB CB . ASN ASN ASN A A 407 407 . 24.791 46.773 20.206 1.00 9.98 1 .  
.  
ATOM 3048 CG CG . ASN ASN ASN A A 407 407 . 25.473 47.951 19.519 1.00 10.83 1 .  
.  
.









ATOM 3139 O O . ASP ASP ASP A A 418 418 . 15.881 48.551 38.966 1.00 38.96 1 .  
.  
ATOM 3140 N N . GLU GLU GLU A A 419 419 . 15.311 47.060 37.438 1.00 34.31 1 .  
.  
ATOM 3141 CA CA . GLU GLU GLU A A 419 419 . 16.057 45.952 37.999 1.00 32.89 1 .  
.  
ATOM 3142 CB CB . GLU GLU GLU A A 419 419 . 15.388 44.586 37.732 1.00 32.10 1 .  
.  
ATOM 3143 C C . GLU GLU GLU A A 419 419 . 17.538 45.891 37.476 1.00 32.50 1 .  
.  
ATOM 3144 O O . GLU GLU GLU A A 419 419 . 18.326 44.989 37.916 1.00 32.34 1 .  
.  
ATOM 3145 N N . ALA ALA ALA A A 420 420 . 17.905 46.765 36.502 1.00 33.24 1 .  
.  
ATOM 3146 CA CA . ALA ALA ALA A A 420 420 . 19.329 46.729 36.025 1.00 31.59 1 .  
.  
ATOM 3147 CB CB . ALA ALA ALA A A 420 420 . 19.483 47.541 34.627 1.00 31.25 1 .  
.  
ATOM 3148 C C . ALA ALA ALA A A 420 420 . 20.253 47.246 37.176 1.00 32.03 1 .  
.  
ATOM 3149 O O . ALA ALA ALA A A 420 420 . 19.882 48.229 37.812 1.00 34.84 1 .  
.  
ATOM 3150 N N . ARG ARG ARG A A 421 421 . 21.358 46.551 37.505 1.00 30.77 1 .  
.  
ATOM 3151 CA CA . ARG ARG ARG A A 421 421 . 22.417 47.105 38.410 1.00 25.74 1 .  
.  
ATOM 3152 CB CB . ARG ARG ARG A A 421 421 . 22.547 46.402 39.737 1.00 26.62 1 .  
.  
ATOM 3153 CG CG . ARG ARG ARG A A 421 421 . 21.348 46.698 40.743 1.00 30.01 1 .  
.  
ATOM 3154 C C . ARG ARG ARG A A 421 421 . 23.750 46.995 37.698 1.00 23.17 1 .  
.  
ATOM 3155 O O . ARG ARG ARG A A 421 421 . 24.159 45.888 37.218 1.00 23.79 1 .  
.  
ATOM 3156 N N . PHE PHE PHE A A 422 422 . 24.441 48.117 37.655 1.00 18.75 1 .  
.  
ATOM 3157 CA CA . PHE PHE PHE A A 422 422 . 25.723 48.141 36.967 1.00 16.03 1 .  
.  
ATOM 3158 CB CB . PHE PHE PHE A A 422 422 . 25.830 49.504 36.294 1.00 15.89 1 .  
.  
ATOM 3159 CG CG . PHE PHE PHE A A 422 422 . 27.161 49.792 35.655 1.00 13.89 1 .  
.  
ATOM 3160 CD1 CD1 . PHE PHE PHE A A 422 422 . 27.557 49.115 34.510 1.00 14.36 1 .  
.  
ATOM 3161 CE1 CE1 . PHE PHE PHE A A 422 422 . 28.734 49.433 33.892 1.00 14.44 1 .  
.  
ATOM 3162 CZ CZ . PHE PHE PHE A A 422 422 . 29.602 50.378 34.373 1.00 15.35 1 .  
.  
ATOM 3163 CE2 CE2 . PHE PHE PHE A A 422 422 . 29.222 51.132 35.514 1.00 17.27 1 .  
.  
ATOM 3164 CD2 CD2 . PHE PHE PHE A A 422 422 . 27.977 50.827 36.141 1.00 16.43 1 .  
.  
ATOM 3165 C C . PHE PHE PHE A A 422 422 . 26.844 47.920 37.958 1.00 16.10 1 .  
.  
ATOM 3166 O O . PHE PHE PHE A A 422 422 . 26.796 48.484 39.089 1.00 16.18 1 .  
.  
ATOM 3167 N N . ALA ALA ALA A A 423 423 . 27.833 47.075 37.607 1.00 14.55 1 .  
.  
ATOM 3168 CA CA . ALA ALA ALA A A 423 423 . 28.883 46.654 38.557 1.00 14.87 1 .  
.













ATOM 3349 OE2 OE2 . GLU GLU GLU B B 9 9 . 22.715 57.403 22.472 1.00 22.51 1 .  
.  
ATOM 3350 C C . GLU GLU GLU B B 9 9 . 21.723 53.187 20.191 1.00 14.69 1 .  
.  
ATOM 3351 O O . GLU GLU GLU B B 9 9 . 21.745 52.682 21.322 1.00 18.57 1 .  
.  
ATOM 3352 N N . ILE ILE ILE B B 10 10 . 22.387 52.692 19.199 1.00 12.61 1 .  
.  
ATOM 3353 CA CA . ILE ILE ILE B B 10 10 . 23.435 51.645 19.367 1.00 11.36 1 .  
.  
ATOM 3354 CB CB . ILE ILE ILE B B 10 10 . 23.074 50.340 18.566 1.00 12.57 1 .  
.  
ATOM 3355 CG1 CG1 . ILE ILE ILE B B 10 10 . 22.882 50.664 17.027 1.00 12.25 1 .  
.  
ATOM 3356 CD CD . ILE ILE ILE B B 10 10 . 22.810 49.384 16.131 1.00 15.62 1 .  
.  
ATOM 3357 CG2 CG2 . ILE ILE ILE B B 10 10 . 21.856 49.609 19.239 1.00 15.24 1 .  
.  
ATOM 3358 C C . ILE ILE ILE B B 10 10 . 24.690 52.265 18.733 1.00 13.13 1 .  
.  
ATOM 3359 O O . ILE ILE ILE B B 10 10 . 24.612 53.375 18.187 1.00 13.64 1 .  
.  
ATOM 3360 N N . LEU LEU LEU B B 11 11 . 25.806 51.598 18.834 1.00 10.60 1 .  
.  
ATOM 3361 CA CA . LEU LEU LEU B B 11 11 . 27.059 52.056 18.171 1.00 10.29 1 .  
.  
ATOM 3362 CB CB . LEU LEU LEU B B 11 11 . 28.243 51.865 19.121 1.00 12.23 1 .  
.  
ATOM 3363 CG CG . LEU LEU LEU B B 11 11 . 28.119 52.724 20.391 1.00 13.39 1 .  
.  
ATOM 3364 CD1 CD1 . LEU LEU LEU B B 11 11 . 29.511 52.704 21.071 1.00 15.23 1 .  
.  
ATOM 3365 CD2 CD2 . LEU LEU LEU B B 11 11 . 27.681 54.168 20.065 1.00 15.80 1 .  
.  
ATOM 3366 C C . LEU LEU LEU B B 11 11 . 27.274 51.345 16.867 1.00 9.99 1 .  
.  
ATOM 3367 O O . LEU LEU LEU B B 11 11 . 27.135 50.109 16.768 1.00 10.22 1 .  
.  
ATOM 3368 N N . ASP ASP ASP B B 12 12 . 27.623 52.108 15.854 1.00 10.33 1 .  
.  
ATOM 3369 CA CA . ASP ASP ASP B B 12 12 . 28.091 51.507 14.579 1.00 9.74 1 .  
.  
ATOM 3370 CB CB . ASP ASP ASP B B 12 12 . 27.775 52.512 13.428 1.00 11.46 1 .  
.  
ATOM 3371 CG CG . ASP ASP ASP B B 12 12 . 28.819 53.734 13.301 1.00 12.13 1 .  
.  
ATOM 3372 OD1 OD1 . ASP ASP ASP B B 12 12 . 29.862 53.756 13.946 1.00 11.61 1 .  
.  
ATOM 3373 OD2 OD2 . ASP ASP ASP B B 12 12 . 28.570 54.631 12.412 1.00 14.93 1 .  
.  
ATOM 3374 C C . ASP ASP ASP B B 12 12 . 29.505 51.073 14.579 1.00 9.89 1 .  
.  
ATOM 3375 O O . ASP ASP ASP B B 12 12 . 30.235 51.170 15.609 1.00 9.66 1 .  
.  
ATOM 3376 N N . SER SER SER B B 13 13 . 29.995 50.602 13.409 1.00 8.49 1 .  
.  
ATOM 3377 CA CA . SER SER SER B B 13 13 . 31.292 49.998 13.359 1.00 9.33 1 .  
.  
ATOM 3378 CB CB . SER SER SER B B 13 13 . 31.427 49.236 12.015 1.00 10.24 1 .  
.  
.









ATOM 3469 O O . TYR TYR TYR B B 24 24 . 4.612 44.655 15.977 1.00 19.27 1 .  
.  
ATOM 3470 N N . THR THR THR B B 25 25 . 5.164 42.484 15.702 1.00 18.82 1 .  
.  
ATOM 3471 CA CA . THR THR THR B B 25 25 . 3.812 42.087 15.204 1.00 20.63 1 .  
.  
ATOM 3472 CB CB . THR THR THR B B 25 25 . 3.800 41.830 13.680 1.00 19.36 1 .  
.  
ATOM 3473 OG1 OG1 . THR THR THR B B 25 25 . 4.576 40.643 13.442 1.00 21.48 1 .  
.  
ATOM 3474 CG2 CG2 . THR THR THR B B 25 25 . 4.414 42.987 12.885 1.00 21.18 1 .  
.  
ATOM 3475 C C . THR THR THR B B 25 25 . 3.437 40.776 15.905 1.00 20.81 1 .  
.  
ATOM 3476 O O . THR THR THR B B 25 25 . 4.182 40.264 16.781 1.00 21.55 1 .  
.  
ATOM 3477 N N . ALA ALA ALA B B 26 26 . 2.293 40.200 15.531 1.00 22.43 1 .  
.  
ATOM 3478 CA CA . ALA ALA ALA B B 26 26 . 1.891 38.942 16.073 1.00 24.77 1 .  
.  
ATOM 3479 CB CB . ALA ALA ALA B B 26 26 . 0.476 38.612 15.624 1.00 26.57 1 .  
.  
ATOM 3480 C C . ALA ALA ALA B B 26 26 . 2.887 37.831 15.684 1.00 25.67 1 .  
.  
ATOM 3481 O O . ALA ALA ALA B B 26 26 . 2.932 36.764 16.332 1.00 27.59 1 .  
.  
ATOM 3482 N N . LYS LYS LYS B B 27 27 . 3.709 38.056 14.667 1.00 24.14 1 .  
.  
ATOM 3483 CA CA . LYS LYS LYS B B 27 27 . 4.750 37.064 14.341 1.00 23.61 1 .  
.  
ATOM 3484 CB CB . LYS LYS LYS B B 27 27 . 5.119 37.076 12.836 1.00 24.77 1 .  
.  
ATOM 3485 CG CG . LYS LYS LYS B B 27 27 . 3.959 36.938 11.846 1.00 26.84 1 .  
.  
ATOM 3486 CD CD . LYS LYS LYS B B 27 27 . 3.560 35.598 11.713 1.00 30.57 1 .  
.  
ATOM 3487 CE CE . LYS LYS LYS B B 27 27 . 2.972 35.317 10.337 1.00 34.64 1 .  
.  
ATOM 3488 NZ NZ . LYS LYS LYS B B 27 27 . 2.364 33.962 10.570 1.00 40.27 1 .  
.  
ATOM 3489 C C . LYS LYS LYS B B 27 27 . 6.040 37.225 15.150 1.00 22.37 1 .  
.  
ATOM 3490 O O . LYS LYS LYS B B 27 27 . 6.930 36.369 15.024 1.00 24.35 1 .  
.  
ATOM 3491 N N . GLY GLY GLY B B 28 28 . 6.144 38.271 15.974 1.00 20.88 1 .  
.  
ATOM 3492 CA CA . GLY GLY GLY B B 28 28 . 7.321 38.454 16.836 1.00 20.49 1 .  
.  
ATOM 3493 C C . GLY GLY GLY B B 28 28 . 8.076 39.747 16.603 1.00 19.77 1 .  
.  
ATOM 3494 O O . GLY GLY GLY B B 28 28 . 7.473 40.759 16.253 1.00 18.67 1 .  
.  
ATOM 3495 N N . LEU LEU LEU B B 29 29 . 9.378 39.736 16.889 1.00 18.00 1 .  
.  
ATOM 3496 CA CA . LEU LEU LEU B B 29 29 . 10.200 40.969 16.914 1.00 18.96 1 .  
.  
ATOM 3497 CB CB . LEU LEU LEU B B 29 29 . 11.129 40.918 18.169 1.00 17.85 1 .  
.  
ATOM 3498 CG CG . LEU LEU LEU B B 29 29 . 12.365 41.784 18.214 1.00 21.45 1 .  
.  
.











































ATOM 4069 O O . PHE PHE PHE B B 105 105 . 14.716 62.230 11.903 1.00 17.37 1 .  
.ATOM 4070 N N . GLY GLY GLY B B 106 106 . 14.786 63.070 9.805 1.00 17.02 1 .  
.ATOM 4071 CA CA . GLY GLY GLY B B 106 106 . 16.066 62.449 9.486 1.00 16.02 1 .  
.ATOM 4072 C C . GLY GLY GLY B B 106 106 . 15.795 61.230 8.635 1.00 15.05 1 .  
.ATOM 4073 O O . GLY GLY GLY B B 106 106 . 14.879 60.427 8.922 1.00 17.12 1 .  
.ATOM 4074 N N . ALA ALA ALA B B 107 107 . 16.604 61.076 7.609 1.00 14.24 1 .  
.ATOM 4075 CA CA . ALA ALA ALA B B 107 107 . 16.527 59.865 6.764 1.00 14.85 1 .  
.ATOM 4076 CB CB . ALA ALA ALA B B 107 107 . 17.479 59.976 5.576 1.00 14.67 1 .  
.ATOM 4077 C C . ALA ALA ALA B B 107 107 . 16.843 58.639 7.641 1.00 15.25 1 .  
.ATOM 4078 O O . ALA ALA ALA B B 107 107 . 16.370 57.522 7.340 1.00 15.30 1 .  
.ATOM 4079 N N . ASN ASN ASN B B 108 108 . 17.662 58.856 8.672 1.00 14.14 1 .  
.ATOM 4080 CA CA . ASN ASN ASN B B 108 108 . 18.052 57.746 9.608 1.00 14.08 1 .  
.ATOM 4081 CB CB . ASN ASN ASN B B 108 108 . 19.318 58.038 10.433 1.00 14.93 1 .  
.ATOM 4082 CG CG . ASN ASN ASN B B 108 108 . 19.324 59.399 11.110 1.00 15.60 1 .  
.ATOM 4083 OD1 OD1 . ASN ASN ASN B B 108 108 . 18.635 60.342 10.660 1.00 18.18 1 .  
.ATOM 4084 ND2 ND2 . ASN ASN ASN B B 108 108 . 20.200 59.529 12.132 1.00 14.82 1 .  
.ATOM 4085 C C . ASN ASN ASN B B 108 108 . 16.868 57.270 10.433 1.00 15.98 1 .  
.ATOM 4086 O O . ASN ASN ASN B B 108 108 . 16.738 56.062 10.678 1.00 18.30 1 .  
.ATOM 4087 N N . ALA ALA ALA B B 109 109 . 15.962 58.191 10.780 1.00 13.48 1 .  
.ATOM 4088 CA CA . ALA ALA ALA B B 109 109 . 14.755 57.783 11.508 1.00 13.83 1 .  
.ATOM 4089 CB CB . ALA ALA ALA B B 109 109 . 13.971 59.002 12.072 1.00 13.83 1 .  
.ATOM 4090 C C . ALA ALA ALA B B 109 109 . 13.854 56.997 10.557 1.00 14.65 1 .  
.ATOM 4091 O O . ALA ALA ALA B B 109 109 . 13.360 55.900 10.882 1.00 17.17 1 .  
.ATOM 4092 N N . ILE ILE ILE B B 110 110 . 13.553 57.581 9.396 1.00 14.23 1 .  
.ATOM 4093 CA CA . ILE ILE ILE B B 110 110 . 12.593 56.943 8.532 1.00 13.82 1 .  
.ATOM 4094 CB CB . ILE ILE ILE B B 110 110 . 12.253 57.869 7.332 1.00 14.20 1 .  
.ATOM 4095 CG1 CG1 . ILE ILE ILE B B 110 110 . 11.581 59.148 7.860 1.00 14.16 1 .  
.ATOM 4096 CD CD . ILE ILE ILE B B 110 110 . 11.480 60.250 6.776 1.00 18.84 1 .  
.ATOM 4097 CG2 CG2 . ILE ILE ILE B B 110 110 . 11.461 57.144 6.274 1.00 15.06 1 .  
.ATOM 4098 C C . ILE ILE ILE B B 110 110 . 13.124 55.572 8.060 1.00 12.39 1 .  
.



ATOM 4099 O O . ILE ILE ILE B B 110 110 . 12.372 54.621 8.003 1.00 13.56 1 .  
.  
ATOM 4100 N N . LEU LEU LEU B B 111 111 . 14.403 55.517 7.694 1.00 11.22 1 .  
.  
ATOM 4101 CA CA . LEU LEU LEU B B 111 111 . 14.911 54.258 7.130 1.00 11.00 1 .  
.  
ATOM 4102 CB CB . LEU LEU LEU B B 111 111 . 16.336 54.409 6.618 1.00 10.96 1 .  
.  
ATOM 4103 CG CG . LEU LEU LEU B B 111 111 . 16.936 53.112 6.038 1.00 13.50 1 .  
.  
ATOM 4104 CD1 CD1 . LEU LEU LEU B B 111 111 . 16.060 52.576 4.807 1.00 12.71 1 .  
.  
ATOM 4105 CD2 CD2 . LEU LEU LEU B B 111 111 . 18.401 53.398 5.615 1.00 12.10 1 .  
.  
ATOM 4106 C C . LEU LEU LEU B B 111 111 . 14.881 53.115 8.191 1.00 12.07 1 .  
.  
ATOM 4107 O O . LEU LEU LEU B B 111 111 . 14.562 51.954 7.832 1.00 14.13 1 .  
.  
ATOM 4108 N N . GLY GLY GLY B B 112 112 . 15.234 53.464 9.419 1.00 12.11 1 .  
.  
ATOM 4109 CA CA . GLY GLY GLY B B 112 112 . 15.245 52.456 10.502 1.00 12.83 1 .  
.  
ATOM 4110 C C . GLY GLY GLY B B 112 112 . 13.870 51.716 10.565 1.00 13.87 1 .  
.  
ATOM 4111 O O . GLY GLY GLY B B 112 112 . 13.772 50.447 10.660 1.00 12.83 1 .  
.  
ATOM 4112 N N . VAL VAL VAL B B 113 113 . 12.796 52.492 10.506 1.00 14.42 1 .  
.  
ATOM 4113 CA CA . VAL VAL VAL B B 113 113 . 11.491 51.914 10.544 1.00 13.08 1 .  
.  
ATOM 4114 CB CB . VAL VAL VAL B B 113 113 . 10.416 53.021 10.793 1.00 13.82 1 .  
.  
ATOM 4115 CG1 CG1 . VAL VAL VAL B B 113 113 . 8.999 52.378 10.756 1.00 13.23 1 .  
.  
ATOM 4116 CG2 CG2 . VAL VAL VAL B B 113 113 . 10.633 53.632 12.134 1.00 15.54 1 .  
.  
ATOM 4117 C C . VAL VAL VAL B B 113 113 . 11.194 51.172 9.240 1.00 13.49 1 .  
.  
ATOM 4118 O O . VAL VAL VAL B B 113 113 . 10.612 50.088 9.253 1.00 13.09 1 .  
.  
ATOM 4119 N N . SER SER SER B B 114 114 . 11.533 51.779 8.108 1.00 12.32 1 .  
.  
ATOM 4120 CA CA . SER SER SER B B 114 114 . 11.266 51.166 6.794 1.00 13.00 1 .  
.  
ATOM 4121 CB CB . SER SER SER B B 114 114 . 11.823 52.096 5.684 1.00 12.58 1 .  
.  
ATOM 4122 OG OG . SER SER SER B B 114 114 . 11.436 51.584 4.428 1.00 14.95 1 .  
.  
ATOM 4123 C C . SER SER SER B B 114 114 . 11.877 49.728 6.728 1.00 12.80 1 .  
.  
ATOM 4124 O O . SER SER SER B B 114 114 . 11.241 48.806 6.207 1.00 13.94 1 .  
.  
ATOM 4125 N N . LEU LEU LEU B B 115 115 . 13.135 49.593 7.203 1.00 12.33 1 .  
.  
ATOM 4126 CA CA . LEU LEU LEU B B 115 115 . 13.823 48.287 7.124 1.00 12.10 1 .  
.  
ATOM 4127 CB CB . LEU LEU LEU B B 115 115 . 15.285 48.460 7.609 1.00 12.04 1 .  
.  
ATOM 4128 CG CG . LEU LEU LEU B B 115 115 . 16.206 49.378 6.761 1.00 11.19 1 .  
.  
.













ATOM 4309 CB CB . SER SER SER B B 140 140 . 9.575 35.516 -10.553 1.00 35.43 1 .  
.ATOM 4310 OG OG . SER SER SER B B 140 140 . 9.800 35.776 -11.917 1.00 39.81 1 .  
.ATOM 4311 C C . SER SER SER B B 140 140 . 11.991 35.273 -9.964 1.00 36.51 1 .  
.ATOM 4312 O O . SER SER SER B B 140 140 . 11.945 34.054 -9.837 1.00 40.05 1 .  
.ATOM 4313 N N . ASP ASP ASP B B 141 141 . 13.104 35.907 -10.302 1.00 36.38 1 .  
.ATOM 4314 CA CA . ASP ASP ASP B B 141 141 . 14.356 35.186 -10.342 1.00 34.51 1 .  
.ATOM 4315 CB CB . ASP ASP ASP B B 141 141 . 15.119 35.454 -11.651 1.00 36.03 1 .  
.ATOM 4316 CG CG . ASP ASP ASP B B 141 141 . 14.445 34.799 -12.892 1.00 37.04 1 .  
.ATOM 4317 C C . ASP ASP ASP B B 141 141 . 15.129 35.697 -9.091 1.00 32.73 1 .  
.ATOM 4318 O O . ASP ASP ASP B B 141 141 . 14.701 36.719 -8.432 1.00 34.04 1 .  
.ATOM 4319 N N . LEU LEU LEU B B 142 142 . 16.194 34.976 -8.729 1.00 28.68 1 .  
.ATOM 4320 CA CA . LEU LEU LEU B B 142 142 . 17.068 35.363 -7.616 1.00 24.78 1 .  
.ATOM 4321 CB CB . LEU LEU LEU B B 142 142 . 16.707 34.554 -6.386 1.00 22.42 1 .  
.ATOM 4322 CG CG . LEU LEU LEU B B 142 142 . 15.279 34.650 -5.784 1.00 22.68 1 .  
.ATOM 4323 CD1 CD1 . LEU LEU LEU B B 142 142 . 15.098 33.542 -4.745 1.00 27.99 1 .  
.ATOM 4324 CD2 CD2 . LEU LEU LEU B B 142 142 . 15.041 35.977 -5.073 1.00 25.46 1 .  
.ATOM 4325 C C . LEU LEU LEU B B 142 142 . 18.451 35.015 -8.128 1.00 23.61 1 .  
.ATOM 4326 O O . LEU LEU LEU B B 142 142 . 18.613 34.034 -8.873 1.00 26.60 1 .  
.ATOM 4327 N N . ILE ILE ILE B B 143 143 . 19.426 35.862 -7.863 1.00 20.97 1 .  
.ATOM 4328 CA CA . ILE ILE ILE B B 143 143 . 20.744 35.626 -8.337 1.00 19.84 1 .  
.ATOM 4329 CB CB . ILE ILE ILE B B 143 143 . 21.082 36.611 -9.514 1.00 22.04 1 .  
.ATOM 4330 CG1 CG1 . ILE ILE ILE B B 143 143 . 19.988 36.538 -10.585 1.00 26.61 1 .  
.ATOM 4331 CD CD . ILE ILE ILE B B 143 143 . 20.241 35.465 -11.645 1.00 31.96 1 .  
.ATOM 4332 CG2 CG2 . ILE ILE ILE B B 143 143 . 22.416 36.221 -10.130 1.00 28.41 1 .  
.ATOM 4333 C C . ILE ILE ILE B B 143 143 . 21.692 35.982 -7.211 1.00 17.32 1 .  
.ATOM 4334 O O . ILE ILE ILE B B 143 143 . 21.472 36.981 -6.520 1.00 17.21 1 .  
.ATOM 4335 N N . LEU LEU LEU B B 144 144 . 22.703 35.149 -6.981 1.00 14.57 1 .  
.ATOM 4336 CA CA . LEU LEU LEU B B 144 144 . 23.778 35.542 -6.027 1.00 13.19 1 .  
.ATOM 4337 CB CB . LEU LEU LEU B B 144 144 . 24.558 34.290 -5.501 1.00 14.79 1 .  
.ATOM 4338 CG CG . LEU LEU LEU B B 144 144 . 23.935 33.537 -4.304 1.00 15.42 1 .  
.













ATOM 4489 C C . GLN GLN GLN B B 165 165 . 39.292 54.435 -1.978 1.00 16.46 1 .  
.ATOM 4490 O O . GLN GLN GLN B B 165 165 . 39.686 53.953 -0.897 1.00 18.28 1 .  
.ATOM 4491 N N . GLU GLU GLU B B 166 166 . 38.911 53.655 -2.991 1.00 15.25 1 .  
.ATOM 4492 CA CA . GLU GLU GLU B B 166 166 . 38.843 52.215 -2.753 1.00 15.03 1 .  
.ATOM 4493 CB CB . GLU GLU GLU B B 166 166 . 37.382 51.745 -2.619 1.00 16.76 1 .  
.ATOM 4494 CG CG . GLU GLU GLU B B 166 166 . 36.575 52.486 -1.585 1.00 20.88 1 .  
.ATOM 4495 CD CD . GLU GLU GLU B B 166 166 . 35.053 52.201 -1.601 1.00 21.41 1 .  
.ATOM 4496 OE1 OE1 . GLU GLU GLU B B 166 166 . 34.558 51.266 -2.280 1.00 19.61 1 .  
.ATOM 4497 OE2 OE2 . GLU GLU GLU B B 166 166 . 34.320 52.938 -0.845 1.00 27.79 1 .  
.ATOM 4498 C C . GLU GLU GLU B B 166 166 . 39.346 51.477 -3.991 1.00 13.94 1 .  
.ATOM 4499 O O . GLU GLU GLU B B 166 166 . 39.012 51.831 -5.127 1.00 13.54 1 .  
.ATOM 4500 N N . PHE PHE PHE B B 167 167 . 40.131 50.445 -3.729 1.00 12.20 1 .  
.ATOM 4501 CA CA . PHE PHE PHE B B 167 167 . 40.570 49.463 -4.772 1.00 11.90 1 .  
.ATOM 4502 CB CB . PHE PHE PHE B B 167 167 . 42.101 49.468 -4.841 1.00 13.00 1 .  
.ATOM 4503 CG CG . PHE PHE PHE B B 167 167 . 42.642 50.796 -5.266 1.00 14.52 1 .  
.ATOM 4504 CD1 CD1 . PHE PHE PHE B B 167 167 . 42.806 51.869 -4.322 1.00 15.71 1 .  
.ATOM 4505 CE1 CE1 . PHE PHE PHE B B 167 167 . 43.272 53.153 -4.758 1.00 15.50 1 .  
.ATOM 4506 CZ CZ . PHE PHE PHE B B 167 167 . 43.585 53.357 -6.112 1.00 16.66 1 .  
.ATOM 4507 CE2 CE2 . PHE PHE PHE B B 167 167 . 43.386 52.288 -7.041 1.00 15.39 1 .  
.ATOM 4508 CD2 CD2 . PHE PHE PHE B B 167 167 . 42.945 50.988 -6.567 1.00 16.13 1 .  
.ATOM 4509 C C . PHE PHE PHE B B 167 167 . 40.015 48.121 -4.387 1.00 12.27 1 .  
.ATOM 4510 O O . PHE PHE PHE B B 167 167 . 40.351 47.641 -3.282 1.00 15.20 1 .  
.ATOM 4511 N N . MET MET MET B B 168 168 . 39.142 47.511 -5.224 1.00 12.31 1 .  
.ATOM 4512 CA CA . MET MET MET B B 168 168 . 38.351 46.332 -4.887 1.00 12.29 1 .  
.ATOM 4513 CB CB . MET MET MET B B 168 168 . 36.846 46.630 -5.178 1.00 14.28 1 .  
.ATOM 4514 CG CG . MET MET MET B B 168 168 . 36.308 47.715 -4.113 1.00 13.69 1 .  
.ATOM 4515 SD SD . MET MET MET B B 168 168 . 34.579 48.089 -4.544 1.00 21.08 1 .  
.ATOM 4516 CE CE . MET MET MET B B 168 168 . 34.845 49.557 -5.601 1.00 18.74 1 .  
.ATOM 4517 C C . MET MET MET B B 168 168 . 38.728 45.177 -5.773 1.00 12.84 1 .  
.ATOM 4518 O O . MET MET MET B B 168 168 . 39.136 45.373 -6.920 1.00 12.80 1 .  
.



ATOM 4549 N N . GLY GLY GLY B B 173 173 . 35.325 34.947 -11.687 1.00 15.41 1 .  
.  
ATOM 4550 CA CA . GLY GLY GLY B B 173 173 . 35.579 33.559 -12.231 1.00 16.19 1 .  
.  
ATOM 4551 C C . GLY GLY GLY B B 173 173 . 35.285 32.494 -11.199 1.00 17.47 1 .  
.  
ATOM 4552 O O . GLY GLY GLY B B 173 173 . 35.547 31.273 -11.445 1.00 18.66 1 .  
.  
ATOM 4553 N N . ALA ALA ALA B B 174 174 . 34.753 32.897 -10.029 1.00 15.63 1 .  
.  
ATOM 4554 CA CA . ALA ALA ALA B B 174 174 . 34.425 31.866 -9.010 1.00 15.71 1 .  
.  
ATOM 4555 CB CB . ALA ALA ALA B B 174 174 . 34.002 32.615 -7.694 1.00 14.61 1 .  
.  
ATOM 4556 C C . ALA ALA ALA B B 174 174 . 33.313 30.894 -9.424 1.00 16.10 1 .  
.  
ATOM 4557 O O . ALA ALA ALA B B 174 174 . 32.451 31.209 -10.214 1.00 17.12 1 .  
.  
ATOM 4558 N N . GLU GLU GLU B B 175 175 . 33.282 29.703 -8.808 1.00 16.80 1 .  
.  
ATOM 4559 CA CA . GLU GLU GLU B B 175 175 . 32.227 28.756 -9.115 1.00 18.62 1 .  
.  
ATOM 4560 CB CB . GLU GLU GLU B B 175 175 . 32.696 27.305 -8.726 1.00 18.85 1 .  
.  
ATOM 4561 CG CG . GLU GLU GLU B B 175 175 . 34.043 27.001 -9.383 1.00 24.72 1 .  
.  
ATOM 4562 CD CD . GLU GLU GLU B B 175 175 . 33.888 26.624 -10.845 1.00 33.14 1 .  
.  
ATOM 4563 C C . GLU GLU GLU B B 175 175 . 30.883 29.014 -8.496 1.00 17.67 1 .  
.  
ATOM 4564 O O . GLU GLU GLU B B 175 175 . 29.860 28.475 -8.968 1.00 20.36 1 .  
.  
ATOM 4565 N N . SER SER SER B B 176 176 . 30.866 29.821 -7.412 1.00 14.57 1 .  
.  
ATOM 4566 CA CA . SER SER SER B B 176 176 . 29.633 29.953 -6.621 1.00 13.84 1 .  
.  
ATOM 4567 CB CB . SER SER SER B B 176 176 . 29.412 28.721 -5.697 1.00 13.24 1 .  
.  
ATOM 4568 OG OG . SER SER SER B B 176 176 . 30.491 28.560 -4.832 1.00 14.10 1 .  
.  
ATOM 4569 C C . SER SER SER B B 176 176 . 29.924 31.213 -5.760 1.00 12.99 1 .  
.  
ATOM 4570 O O . SER SER SER B B 176 176 . 31.078 31.681 -5.730 1.00 12.65 1 .  
.  
ATOM 4571 N N . PHE PHE PHE B B 177 177 . 28.915 31.652 -4.992 1.00 13.22 1 .  
.  
ATOM 4572 CA CA . PHE PHE PHE B B 177 177 . 29.147 32.723 -4.021 1.00 12.08 1 .  
.  
ATOM 4573 CB CB . PHE PHE PHE B B 177 177 . 27.831 33.238 -3.399 1.00 10.59 1 .  
.  
ATOM 4574 CG CG . PHE PHE PHE B B 177 177 . 28.080 34.481 -2.642 1.00 9.80 1 .  
.  
ATOM 4575 CD1 CD1 . PHE PHE PHE B B 177 177 . 28.239 35.683 -3.307 1.00 12.20 1 .  
.  
ATOM 4576 CE1 CE1 . PHE PHE PHE B B 177 177 . 28.628 36.832 -2.621 1.00 12.79 1 .  
.  
ATOM 4577 CZ CZ . PHE PHE PHE B B 177 177 . 28.989 36.764 -1.308 1.00 14.11 1 .  
.  
ATOM 4578 CE2 CE2 . PHE PHE PHE B B 177 177 . 28.907 35.532 -0.605 1.00 10.31 1 .  
.  
.









ATOM 4669 O O . TYR TYR TYR B B 188 188 . 45.266 39.880 2.121 1.00 11.28 1 .  
.ATOM 4670 N N . HIS HIS HIS B B 189 189 . 44.401 37.816 2.266 1.00 12.17 1 .  
.ATOM 4671 CA CA . HIS HIS HIS B B 189 189 . 45.534 37.340 3.127 1.00 14.93 1 .  
.ATOM 4672 CB CB . HIS HIS HIS B B 189 189 . 45.239 35.921 3.586 1.00 14.76 1 .  
.ATOM 4673 CG CG . HIS HIS HIS B B 189 189 . 44.039 35.830 4.489 1.00 17.81 1 .  
.ATOM 4674 ND1 ND1 . HIS HIS HIS B B 189 189 . 43.017 34.907 4.349 1.00 23.75 1 .  
.ATOM 4675 CE1 CE1 . HIS HIS HIS B B 189 189 . 42.108 35.131 5.297 1.00 23.86 1 .  
.ATOM 4676 NE2 NE2 . HIS HIS HIS B B 189 189 . 42.482 36.205 5.985 1.00 25.52 1 .  
.ATOM 4677 CD2 CD2 . HIS HIS HIS B B 189 189 . 43.678 36.644 5.494 1.00 22.31 1 .  
.ATOM 4678 C C . HIS HIS HIS B B 189 189 . 46.860 37.413 2.352 1.00 13.96 1 .  
.ATOM 4679 O O . HIS HIS HIS B B 189 189 . 47.910 37.783 2.892 1.00 15.56 1 .  
.ATOM 4680 N N . THR THR THR B B 190 190 . 46.825 37.085 1.062 1.00 12.87 1 .  
.ATOM 4681 CA CA . THR THR THR B B 190 190 . 48.052 37.191 0.230 1.00 13.41 1 .  
.ATOM 4682 CB CB . THR THR THR B B 190 190 . 47.777 36.655 -1.167 1.00 12.05 1 .  
.ATOM 4683 OG1 OG1 . THR THR THR B B 190 190 . 47.410 35.295 -1.040 1.00 15.83 1 .  
.ATOM 4684 CG2 CG2 . THR THR THR B B 190 190 . 49.067 36.757 -2.020 1.00 14.95 1 .  
.ATOM 4685 C C . THR THR THR B B 190 190 . 48.515 38.615 0.116 1.00 12.62 1 .  
.ATOM 4686 O O . THR THR THR B B 190 190 . 49.720 38.924 0.302 1.00 13.94 1 .  
.ATOM 4687 N N . LEU LEU LEU B B 191 191 . 47.563 39.536 -0.028 1.00 12.71 1 .  
.ATOM 4688 CA CA . LEU LEU LEU B B 191 191 . 47.922 40.960 -0.130 1.00 11.91 1 .  
.ATOM 4689 CB CB . LEU LEU LEU B B 191 191 . 46.623 41.747 -0.448 1.00 11.78 1 .  
.ATOM 4690 CG CG . LEU LEU LEU B B 191 191 . 46.843 43.273 -0.462 1.00 13.32 1 .  
.ATOM 4691 CD1 CD1 . LEU LEU LEU B B 191 191 . 45.399 43.981 -0.620 1.00 14.93 1 .  
.ATOM 4692 CD2 CD2 . LEU LEU LEU B B 191 191 . 47.802 43.804 -1.601 1.00 16.79 1 .  
.ATOM 4693 C C . LEU LEU LEU B B 191 191 . 48.545 41.485 1.154 1.00 12.69 1 .  
.ATOM 4694 O O . LEU LEU LEU B B 191 191 . 49.427 42.312 1.096 1.00 14.06 1 .  
.ATOM 4695 N N . LYS LYS LYS B B 192 192 . 48.041 41.033 2.322 1.00 12.48 1 .  
.ATOM 4696 CA CA . LYS LYS LYS B B 192 192 . 48.651 41.432 3.577 1.00 12.07 1 .  
.ATOM 4697 CB CB . LYS LYS LYS B B 192 192 . 47.974 40.738 4.791 1.00 14.26 1 .  
.ATOM 4698 CG CG . LYS LYS LYS B B 192 192 . 48.275 41.443 6.085 1.00 13.24 1 .  
.





ATOM 4759 N N . GLY GLY GLY B B 200 200 . 56.510 46.861 5.234 1.00 20.02 1 .  
.  
ATOM 4760 CA CA . GLY GLY GLY B B 200 200 . 56.767 46.580 6.662 1.00 20.98 1 .  
.  
ATOM 4761 C C . GLY GLY GLY B B 200 200 . 55.466 46.171 7.336 1.00 23.62 1 .  
.  
ATOM 4762 O O . GLY GLY GLY B B 200 200 . 54.361 46.453 6.845 1.00 21.87 1 .  
.  
ATOM 4763 N N . LYS LYS LYS B B 201 201 . 55.620 45.448 8.436 1.00 27.02 1 .  
.  
ATOM 4764 CA CA . LYS LYS LYS B B 201 201 . 54.450 45.049 9.296 1.00 28.89 1 .  
.  
ATOM 4765 CB CB . LYS LYS LYS B B 201 201 . 55.001 44.482 10.572 1.00 29.76 1 .  
.  
ATOM 4766 C C . LYS LYS LYS B B 201 201 . 53.595 46.244 9.665 1.00 29.29 1 .  
.  
ATOM 4767 O O . LYS LYS LYS B B 201 201 . 52.328 46.164 9.720 1.00 30.00 1 .  
.  
ATOM 4768 N N . ASP ASP ASP B B 202 202 . 54.266 47.345 10.004 1.00 28.73 1 .  
.  
ATOM 4769 CA CA . ASP ASP ASP B B 202 202 . 53.576 48.543 10.391 1.00 30.53 1 .  
.  
ATOM 4770 CB CB . ASP ASP ASP B B 202 202 . 54.578 49.706 10.821 1.00 34.01 1 .  
.  
ATOM 4771 CG CG . ASP ASP ASP B B 202 202 . 55.300 49.413 12.197 1.00 41.60 1 .  
.  
ATOM 4772 OD1 OD1 . ASP ASP ASP B B 202 202 . 55.789 48.240 12.366 1.00 47.10 1 .  
.  
ATOM 4773 OD2 OD2 . ASP ASP ASP B B 202 202 . 55.399 50.318 13.137 1.00 53.23 1 .  
.  
ATOM 4774 C C . ASP ASP ASP B B 202 202 . 52.540 49.019 9.395 1.00 27.41 1 .  
.  
ATOM 4775 O O . ASP ASP ASP B B 202 202 . 51.728 49.840 9.790 1.00 28.74 1 .  
.  
ATOM 4776 N N . ALA ALA ALA B B 203 203 . 52.524 48.517 8.130 1.00 23.83 1 .  
.  
ATOM 4777 CA CA . ALA ALA ALA B B 203 203 . 51.632 49.015 7.044 1.00 21.03 1 .  
.  
ATOM 4778 CB CB . ALA ALA ALA B B 203 203 . 52.330 49.005 5.697 1.00 21.71 1 .  
.  
ATOM 4779 C C . ALA ALA ALA B B 203 203 . 50.393 48.078 6.909 1.00 19.45 1 .  
.  
ATOM 4780 O O . ALA ALA ALA B B 203 203 . 49.602 48.206 5.956 1.00 19.27 1 .  
.  
ATOM 4781 N N . THR THR THR B B 204 204 . 50.257 47.125 7.824 1.00 17.52 1 .  
.  
ATOM 4782 CA CA . THR THR THR B B 204 204 . 49.223 46.113 7.619 1.00 17.76 1 .  
.  
ATOM 4783 CB CB . THR THR THR B B 204 204 . 49.789 44.673 7.701 1.00 18.71 1 .  
.  
ATOM 4784 OG1 OG1 . THR THR THR B B 204 204 . 50.330 44.440 9.034 1.00 22.63 1 .  
.  
ATOM 4785 CG2 CG2 . THR THR THR B B 204 204 . 50.904 44.508 6.627 1.00 22.23 1 .  
.  
ATOM 4786 C C . THR THR THR B B 204 204 . 48.054 46.166 8.594 1.00 15.25 1 .  
.  
ATOM 4787 O O . THR THR THR B B 204 204 . 47.271 45.209 8.663 1.00 16.54 1 .  
.  
ATOM 4788 N N . ASN ASN ASN B B 205 205 . 47.872 47.266 9.264 1.00 16.28 1 .  
.  
.









ATOM 4879 N N . GLU GLU GLU B B 218 218 . 50.812 57.191 -5.286 1.00 22.81 1 .  
.  
ATOM 4880 CA CA . GLU GLU GLU B B 218 218 . 50.461 56.878 -6.685 1.00 20.19 1 .  
.  
ATOM 4881 CB CB . GLU GLU GLU B B 218 218 . 51.689 56.338 -7.482 1.00 22.26 1 .  
.  
ATOM 4882 CG CG . GLU GLU GLU B B 218 218 . 52.821 57.381 -7.523 1.00 27.94 1 .  
.  
ATOM 4883 CD CD . GLU GLU GLU B B 218 218 . 52.564 58.461 -8.570 1.00 38.71 1 .  
.  
ATOM 4884 OE1 OE1 . GLU GLU GLU B B 218 218 . 53.242 59.529 -8.508 1.00 45.75 1 .  
.  
ATOM 4885 OE2 OE2 . GLU GLU GLU B B 218 218 . 51.665 58.275 -9.456 1.00 42.62 1 .  
.  
ATOM 4886 C C . GLU GLU GLU B B 218 218 . 49.330 55.868 -6.718 1.00 20.87 1 .  
.  
ATOM 4887 O O . GLU GLU GLU B B 218 218 . 49.427 54.761 -6.141 1.00 20.05 1 .  
.  
ATOM 4888 N N . ASN ASN ASN B B 219 219 . 48.246 56.229 -7.409 1.00 19.11 1 .  
.  
ATOM 4889 CA CA . ASN ASN ASN B B 219 219 . 47.156 55.287 -7.516 1.00 19.27 1 .  
.  
ATOM 4890 CB CB . ASN ASN ASN B B 219 219 . 45.913 55.988 -8.085 1.00 19.40 1 .  
.  
ATOM 4891 CG CG . ASN ASN ASN B B 219 219 . 45.465 57.107 -7.183 1.00 19.53 1 .  
.  
ATOM 4892 OD1 OD1 . ASN ASN ASN B B 219 219 . 45.771 58.280 -7.482 1.00 24.60 1 .  
.  
ATOM 4893 ND2 ND2 . ASN ASN ASN B B 219 219 . 44.884 56.790 -6.040 1.00 14.24 1 .  
.  
ATOM 4894 C C . ASN ASN ASN B B 219 219 . 47.551 54.031 -8.274 1.00 17.83 1 .  
.  
ATOM 4895 O O . ASN ASN ASN B B 219 219 . 47.003 52.928 -8.000 1.00 18.44 1 .  
.  
ATOM 4896 N N . SER SER SER B B 220 220 . 48.468 54.186 -9.219 1.00 19.01 1 .  
.  
ATOM 4897 CA CA . SER SER SER B B 220 220 . 48.969 53.032 -9.965 1.00 19.65 1 .  
.  
ATOM 4898 CB CB . SER SER SER B B 220 220 . 49.885 53.451 -11.120 1.00 20.79 1 .  
.  
ATOM 4899 OG OG . SER SER SER B B 220 220 . 51.029 54.098 -10.625 1.00 24.62 1 .  
.  
ATOM 4900 C C . SER SER SER B B 220 220 . 49.695 52.042 -9.045 1.00 18.30 1 .  
.  
ATOM 4901 O O . SER SER SER B B 220 220 . 49.641 50.838 -9.279 1.00 18.80 1 .  
.  
ATOM 4902 N N . GLU GLU GLU B B 221 221 . 50.332 52.508 -7.985 1.00 17.71 1 .  
.  
ATOM 4903 CA CA . GLU GLU GLU B B 221 221 . 50.951 51.582 -7.011 1.00 18.16 1 .  
.  
ATOM 4904 CB CB . GLU GLU GLU B B 221 221 . 51.897 52.405 -6.076 1.00 19.14 1 .  
.  
ATOM 4905 CG CG . GLU GLU GLU B B 221 221 . 52.501 51.551 -4.967 1.00 24.72 1 .  
.  
ATOM 4906 CD CD . GLU GLU GLU B B 221 221 . 53.364 50.364 -5.430 1.00 32.42 1 .  
.  
ATOM 4907 OE1 OE1 . GLU GLU GLU B B 221 221 . 53.783 49.599 -4.526 1.00 38.60 1 .  
.  
ATOM 4908 OE2 OE2 . GLU GLU GLU B B 221 221 . 53.634 50.154 -6.647 1.00 35.58 1 .  
.  
.

ATOM 4909 C C . GLU GLU GLU B B 221 221 . 49.898 50.731 -6.246 1.00 17.51 1 .  
.ATOM 4910 O O . GLU GLU GLU B B 221 221 . 50.122 49.522 -5.973 1.00 16.37 1 .  
.ATOM 4911 N N . ALA ALA ALA B B 222 222 . 48.741 51.331 -5.891 1.00 16.21 1 .  
.ATOM 4912 CA CA . ALA ALA ALA B B 222 222 . 47.648 50.529 -5.369 1.00 16.22 1 .  
.ATOM 4913 CB CB . ALA ALA ALA B B 222 222 . 46.441 51.389 -4.949 1.00 16.56 1 .  
.ATOM 4914 C C . ALA ALA ALA B B 222 222 . 47.237 49.405 -6.305 1.00 15.10 1 .  
.ATOM 4915 O O . ALA ALA ALA B B 222 222 . 46.995 48.256 -5.893 1.00 15.12 1 .  
.ATOM 4916 N N . LEU LEU LEU B B 223 223 . 47.063 49.754 -7.564 1.00 14.12 1 .  
.ATOM 4917 CA CA . LEU LEU LEU B B 223 223 . 46.682 48.773 -8.567 1.00 14.30 1 .  
.ATOM 4918 CB CB . LEU LEU LEU B B 223 223 . 46.410 49.436 -9.922 1.00 14.81 1 .  
.ATOM 4919 CG CG . LEU LEU LEU B B 223 223 . 45.106 50.290 -9.848 1.00 13.45 1 .  
.ATOM 4920 CD1 CD1 . LEU LEU LEU B B 223 223 . 45.000 51.227 -11.104 1.00 16.08 1 .  
.ATOM 4921 CD2 CD2 . LEU LEU LEU B B 223 223 . 43.893 49.347 -9.799 1.00 16.61 1 .  
.ATOM 4922 C C . LEU LEU LEU B B 223 223 . 47.764 47.665 -8.710 1.00 15.21 1 .  
.ATOM 4923 O O . LEU LEU LEU B B 223 223 . 47.441 46.466 -8.811 1.00 16.20 1 .  
.ATOM 4924 N N . GLU GLU GLU B B 224 224 . 49.019 48.100 -8.712 1.00 15.25 1 .  
.ATOM 4925 CA CA . GLU GLU GLU B B 224 224 . 50.100 47.138 -8.816 1.00 17.14 1 .  
.ATOM 4926 CB CB . GLU GLU GLU B B 224 224 . 51.424 47.857 -8.811 1.00 19.63 1 .  
.ATOM 4927 CG CG . GLU GLU GLU B B 224 224 . 52.484 46.931 -9.361 1.00 27.83 1 .  
.ATOM 4928 CD CD . GLU GLU GLU B B 224 224 . 52.374 46.942 -10.922 1.00 37.96 1 .  
.ATOM 4929 OE1 OE1 . GLU GLU GLU B B 224 224 . 52.120 45.923 -11.525 1.00 43.22 1 .  
.ATOM 4930 OE2 OE2 . GLU GLU GLU B B 224 224 . 52.491 48.025 -11.550 1.00 46.13 1 .  
.ATOM 4931 C C . GLU GLU GLU B B 224 224 . 50.081 46.134 -7.630 1.00 18.03 1 .  
.ATOM 4932 O O . GLU GLU GLU B B 224 224 . 50.322 44.928 -7.818 1.00 17.59 1 .  
.ATOM 4933 N N . LEU LEU LEU B B 225 225 . 49.896 46.643 -6.406 1.00 17.01 1 .  
.ATOM 4934 CA CA . LEU LEU LEU B B 225 225 . 49.823 45.724 -5.251 1.00 15.01 1 .  
.ATOM 4935 CB CB . LEU LEU LEU B B 225 225 . 49.575 46.581 -3.963 1.00 16.63 1 .  
.ATOM 4936 CG CG . LEU LEU LEU B B 225 225 . 50.775 47.429 -3.540 1.00 17.26 1 .  
.ATOM 4937 CD1 CD1 . LEU LEU LEU B B 225 225 . 50.383 48.401 -2.451 1.00 18.20 1 .  
.ATOM 4938 CD2 CD2 . LEU LEU LEU B B 225 225 . 51.912 46.457 -3.001 1.00 19.58 1 .  
.

ATOM 4939 C C . LEU LEU LEU B B 225 225 . 48.704 44.746 -5.350 1.00 13.92 1 .  
.ATOM 4940 O O . LEU LEU LEU B B 225 225 . 48.834 43.569 -5.005 1.00 15.81 1 .  
.ATOM 4941 N N . VAL VAL VAL B B 226 226 . 47.514 45.238 -5.724 1.00 13.73 1 .  
.ATOM 4942 CA CA . VAL VAL VAL B B 226 226 . 46.376 44.334 -5.902 1.00 12.16 1 .  
.ATOM 4943 CB CB . VAL VAL VAL B B 226 226 . 45.097 45.141 -6.160 1.00 14.50 1 .  
.ATOM 4944 CG1 CG1 . VAL VAL VAL B B 226 226 . 43.955 44.229 -6.488 1.00 14.51 1 .  
.ATOM 4945 CG2 CG2 . VAL VAL VAL B B 226 226 . 44.761 46.015 -4.914 1.00 15.96 1 .  
.ATOM 4946 C C . VAL VAL VAL B B 226 226 . 46.621 43.284 -6.991 1.00 12.79 1 .  
.ATOM 4947 O O . VAL VAL VAL B B 226 226 . 46.304 42.123 -6.791 1.00 14.23 1 .  
.ATOM 4948 N N . LYS LYS LYS B B 227 227 . 47.092 43.714 -8.156 1.00 14.54 1 .  
.ATOM 4949 CA CA . LYS LYS LYS B B 227 227 . 47.415 42.804 -9.215 1.00 16.72 1 .  
.ATOM 4950 CB CB . LYS LYS LYS B B 227 227 . 47.858 43.581 -10.465 1.00 17.44 1 .  
.ATOM 4951 CG CG . LYS LYS LYS B B 227 227 . 48.128 42.607 -11.666 1.00 21.64 1 .  
.ATOM 4952 C C . LYS LYS LYS B B 227 227 . 48.485 41.766 -8.753 1.00 16.14 1 .  
.ATOM 4953 O O . LYS LYS LYS B B 227 227 . 48.308 40.602 -9.057 1.00 17.54 1 .  
.ATOM 4954 N N . GLU GLU GLU B B 228 228 . 49.506 42.172 -8.001 1.00 18.68 1 .  
.ATOM 4955 CA CA . GLU GLU GLU B B 228 228 . 50.553 41.234 -7.458 1.00 17.18 1 .  
.ATOM 4956 CB CB . GLU GLU GLU B B 228 228 . 51.700 41.953 -6.723 1.00 18.11 1 .  
.ATOM 4957 CG CG . GLU GLU GLU B B 228 228 . 52.791 41.032 -6.139 1.00 20.04 1 .  
.ATOM 4958 CD CD . GLU GLU GLU B B 228 228 . 54.133 41.798 -5.801 1.00 29.59 1 .  
.ATOM 4959 C C . GLU GLU GLU B B 228 228 . 49.867 40.190 -6.548 1.00 18.01 1 .  
.ATOM 4960 O O . GLU GLU GLU B B 228 228 . 50.127 38.958 -6.645 1.00 18.83 1 .  
.ATOM 4961 N N . ALA ALA ALA B B 229 229 . 48.948 40.672 -5.692 1.00 14.84 1 .  
.ATOM 4962 CA CA . ALA ALA ALA B B 229 229 . 48.298 39.735 -4.804 1.00 14.97 1 .  
.ATOM 4963 CB CB . ALA ALA ALA B B 229 229 . 47.464 40.472 -3.761 1.00 14.07 1 .  
.ATOM 4964 C C . ALA ALA ALA B B 229 229 . 47.423 38.698 -5.547 1.00 15.12 1 .  
.ATOM 4965 O O . ALA ALA ALA B B 229 229 . 47.388 37.519 -5.194 1.00 15.29 1 .  
.ATOM 4966 N N . ILE ILE ILE B B 230 230 . 46.653 39.159 -6.536 1.00 13.66 1 .  
.ATOM 4967 CA CA . ILE ILE ILE B B 230 230 . 45.800 38.271 -7.287 1.00 14.79 1 .  
.ATOM 4968 CB CB . ILE ILE ILE B B 230 230 . 45.072 39.047 -8.368 1.00 13.80 1 .  
.

ATOM 4969 CG1 CG1 . ILE ILE ILE B B 230 230 . 43.935 39.916 -7.735 1.00 13.66 1 .  
.  
ATOM 4970 CD CD . ILE ILE ILE B B 230 230 . 43.331 41.041 -8.642 1.00 15.03 1 .  
.  
ATOM 4971 CG2 CG2 . ILE ILE ILE B B 230 230 . 44.450 38.031 -9.403 1.00 16.24 1 .  
.  
ATOM 4972 C C . ILE ILE ILE B B 230 230 . 46.701 37.191 -7.934 1.00 18.09 1 .  
.  
ATOM 4973 O O . ILE ILE ILE B B 230 230 . 46.432 35.956 -7.890 1.00 17.51 1 .  
.  
ATOM 4974 N N . ASP ASP ASP B B 231 231 . 47.803 37.678 -8.483 1.00 17.61 1 .  
.  
ATOM 4975 CA CA . ASP ASP ASP B B 231 231 . 48.726 36.760 -9.216 1.00 21.03 1 .  
.  
ATOM 4976 CB CB . ASP ASP ASP B B 231 231 . 49.734 37.559 -10.043 1.00 22.29 1 .  
.  
ATOM 4977 CG CG . ASP ASP ASP B B 231 231 . 49.026 38.457 -11.215 1.00 29.62 1 .  
.  
ATOM 4978 OD1 OD1 . ASP ASP ASP B B 231 231 . 49.804 39.242 -11.898 1.00 38.55 1 .  
.  
ATOM 4979 OD2 OD2 . ASP ASP ASP B B 231 231 . 47.722 38.401 -11.489 1.00 32.13 1 .  
.  
ATOM 4980 C C . ASP ASP ASP B B 231 231 . 49.382 35.735 -8.276 1.00 21.24 1 .  
.  
ATOM 4981 O O . ASP ASP ASP B B 231 231 . 49.409 34.506 -8.579 1.00 22.21 1 .  
.  
ATOM 4982 N N . LYS LYS LYS B B 232 232 . 49.910 36.232 -7.155 1.00 21.78 1 .  
.  
ATOM 4983 CA CA . LYS LYS LYS B B 232 232 . 50.564 35.409 -6.135 1.00 22.62 1 .  
.  
ATOM 4984 CB CB . LYS LYS LYS B B 232 232 . 51.266 36.303 -5.097 1.00 23.83 1 .  
.  
ATOM 4985 CG CG . LYS LYS LYS B B 232 232 . 52.069 35.639 -4.117 1.00 27.86 1 .  
.  
ATOM 4986 CD CD . LYS LYS LYS B B 232 232 . 52.861 36.694 -3.295 1.00 35.89 1 .  
.  
ATOM 4987 CE CE . LYS LYS LYS B B 232 232 . 53.564 36.039 -2.067 1.00 38.45 1 .  
.  
ATOM 4988 NZ NZ . LYS LYS LYS B B 232 232 . 54.222 37.065 -1.152 1.00 43.30 1 .  
.  
ATOM 4989 C C . LYS LYS LYS B B 232 232 . 49.597 34.359 -5.536 1.00 22.72 1 .  
.  
ATOM 4990 O O . LYS LYS LYS B B 232 232 . 50.014 33.210 -5.234 1.00 23.98 1 .  
.  
ATOM 4991 N N . ALA ALA ALA B B 233 233 . 48.316 34.699 -5.426 1.00 19.73 1 .  
.  
ATOM 4992 CA CA . ALA ALA ALA B B 233 233 . 47.278 33.762 -4.922 1.00 18.70 1 .  
.  
ATOM 4993 CB CB . ALA ALA ALA B B 233 233 . 45.974 34.565 -4.465 1.00 18.47 1 .  
.  
ATOM 4994 C C . ALA ALA ALA B B 233 233 . 46.878 32.709 -5.934 1.00 18.85 1 .  
.  
ATOM 4995 O O . ALA ALA ALA B B 233 233 . 46.194 31.733 -5.577 1.00 22.15 1 .  
.  
ATOM 4996 N N . GLY GLY GLY B B 234 234 . 47.306 32.888 -7.183 1.00 19.27 1 .  
.  
ATOM 4997 CA CA . GLY GLY GLY B B 234 234 . 46.937 31.976 -8.276 1.00 20.76 1 .  
.  
ATOM 4998 C C . GLY GLY GLY B B 234 234 . 45.663 32.242 -9.031 1.00 20.67 1 .  
.



ATOM 5029 CA CA . LYS LYS LYS B B 238 238 . 39.314 34.629 -12.088 1.00 18.42 1 .  
.ATOM 5030 CB CB . LYS LYS LYS B B 238 238 . 39.278 33.419 -11.154 1.00 19.85 1 .  
.ATOM 5031 CG CG . LYS LYS LYS B B 238 238 . 39.287 32.024 -11.920 1.00 21.04 1 .  
.ATOM 5032 CD CD . LYS LYS LYS B B 238 238 . 39.382 30.887 -10.898 1.00 29.90 1 .  
.ATOM 5033 CE CE . LYS LYS LYS B B 238 238 . 39.353 29.571 -11.696 1.00 34.12 1 .  
.ATOM 5034 NZ NZ . LYS LYS LYS B B 238 238 . 38.458 28.609 -10.954 1.00 44.05 1 .  
.ATOM 5035 C C . LYS LYS LYS B B 238 238 . 38.943 35.873 -11.307 1.00 16.11 1 .  
.ATOM 5036 O O . LYS LYS LYS B B 238 238 . 37.802 35.941 -10.849 1.00 16.44 1 .  
.ATOM 5037 N N . ILE ILE ILE B B 239 239 . 39.883 36.828 -11.169 1.00 15.05 1 .  
.ATOM 5038 CA CA . ILE ILE ILE B B 239 239 . 39.585 38.032 -10.341 1.00 14.82 1 .  
.ATOM 5039 CB CB . ILE ILE ILE B B 239 239 . 40.389 37.978 -9.058 1.00 15.24 1 .  
.ATOM 5040 CG1 CG1 . ILE ILE ILE B B 239 239 . 39.920 36.659 -8.298 1.00 17.07 1 .  
.ATOM 5041 CD CD . ILE ILE ILE B B 239 239 . 40.577 36.493 -7.002 1.00 16.66 1 .  
.ATOM 5042 CG2 CG2 . ILE ILE ILE B B 239 239 . 40.124 39.251 -8.159 1.00 13.14 1 .  
.ATOM 5043 C C . ILE ILE ILE B B 239 239 . 39.915 39.260 -11.102 1.00 14.78 1 .  
.ATOM 5044 O O . ILE ILE ILE B B 239 239 . 41.017 39.357 -11.683 1.00 15.88 1 .  
.ATOM 5045 N N . VAL VAL VAL B B 240 240 . 38.984 40.211 -11.103 1.00 12.10 1 .  
.ATOM 5046 CA CA . VAL VAL VAL B B 240 240 . 39.233 41.470 -11.766 1.00 12.81 1 .  
.ATOM 5047 CB CB . VAL VAL VAL B B 240 240 . 38.257 41.728 -12.857 1.00 12.06 1 .  
.ATOM 5048 CG1 CG1 . VAL VAL VAL B B 240 240 . 38.548 40.727 -14.058 1.00 14.97 1 .  
.ATOM 5049 CG2 CG2 . VAL VAL VAL B B 240 240 . 36.781 41.719 -12.360 1.00 12.42 1 .  
.ATOM 5050 C C . VAL VAL VAL B B 240 240 . 39.149 42.615 -10.686 1.00 13.11 1 .  
.ATOM 5051 O O . VAL VAL VAL B B 240 240 . 38.843 42.338 -9.502 1.00 13.25 1 .  
.ATOM 5052 N N . ILE ILE ILE B B 241 241 . 39.399 43.854 -11.099 1.00 12.32 1 .  
.ATOM 5053 CA CA . ILE ILE ILE B B 241 241 . 39.515 44.982 -10.140 1.00 12.58 1 .  
.ATOM 5054 CB CB . ILE ILE ILE B B 241 241 . 40.901 45.645 -10.247 1.00 11.48 1 .  
.ATOM 5055 CG1 CG1 . ILE ILE ILE B B 241 241 . 41.945 44.607 -9.873 1.00 15.23 1 .  
.ATOM 5056 CD CD . ILE ILE ILE B B 241 241 . 43.395 45.063 -10.210 1.00 16.95 1 .  
.ATOM 5057 CG2 CG2 . ILE ILE ILE B B 241 241 . 41.052 46.976 -9.445 1.00 12.21 1 .  
.ATOM 5058 C C . ILE ILE ILE B B 241 241 . 38.413 45.992 -10.387 1.00 12.23 1 .  
.



ATOM 5059 O O . ILE ILE ILE B B 241 241 . 38.034 46.283 -11.497 1.00 12.50 1 .  
.  
ATOM 5060 N N . GLY GLY GLY B B 242 242 . 37.899 46.574 -9.309 1.00 11.10 1 .  
.  
ATOM 5061 CA CA . GLY GLY GLY B B 242 242 . 36.975 47.711 -9.426 1.00 12.31 1 .  
.  
ATOM 5062 C C . GLY GLY GLY B B 242 242 . 37.567 48.834 -8.605 1.00 11.08 1 .  
.  
ATOM 5063 O O . GLY GLY GLY B B 242 242 . 38.375 48.627 -7.703 1.00 13.22 1 .  
.  
ATOM 5064 N N . MET MET MET B B 243 243 . 37.182 50.078 -8.908 1.00 10.76 1 .  
.  
ATOM 5065 CA CA . MET MET MET B B 243 243 . 37.711 51.201 -8.149 1.00 12.60 1 .  
.  
ATOM 5066 CB CB . MET MET MET B B 243 243 . 38.647 52.054 -9.035 1.00 12.74 1 .  
.  
ATOM 5067 CG CG . MET MET MET B B 243 243 . 39.928 51.287 -9.395 1.00 16.99 1 .  
.  
ATOM 5068 SD SD . MET MET MET B B 243 243 . 40.822 52.300 -10.666 1.00 17.62 1 .  
.  
ATOM 5069 CE CE . MET MET MET B B 243 243 . 41.223 53.702 -9.612 1.00 21.51 1 .  
.  
ATOM 5070 C C . MET MET MET B B 243 243 . 36.542 52.082 -7.696 1.00 12.87 1 .  
.  
ATOM 5071 O O . MET MET MET B B 243 243 . 35.526 52.234 -8.450 1.00 11.87 1 .  
.  
ATOM 5072 N N . ASP ASP ASP B B 244 244 . 36.660 52.711 -6.487 1.00 11.00 1 .  
.  
ATOM 5073 CA CA . ASP ASP ASP B B 244 244 . 35.754 53.825 -6.177 1.00 11.57 1 .  
.  
ATOM 5074 CB CB . ASP ASP ASP B B 244 244 . 34.969 53.587 -4.924 1.00 11.82 1 .  
.  
ATOM 5075 CG CG . ASP ASP ASP B B 244 244 . 34.068 54.777 -4.547 1.00 12.06 1 .  
.  
ATOM 5076 OD1 OD1 . ASP ASP ASP B B 244 244 . 34.044 55.780 -5.298 1.00 13.13 1 .  
.  
ATOM 5077 OD2 OD2 . ASP ASP ASP B B 244 244 . 33.245 54.656 -3.593 1.00 13.94 1 .  
.  
ATOM 5078 C C . ASP ASP ASP B B 244 244 . 36.680 55.024 -5.971 1.00 12.74 1 .  
.  
ATOM 5079 O O . ASP ASP ASP B B 244 244 . 37.459 55.110 -5.009 1.00 14.12 1 .  
.  
ATOM 5080 N N . VAL VAL VAL B B 245 245 . 36.659 55.943 -6.929 1.00 11.01 1 .  
.  
ATOM 5081 CA CA . VAL VAL VAL B B 245 245 . 37.577 57.038 -6.894 1.00 11.26 1 .  
.  
ATOM 5082 CB CB . VAL VAL VAL B B 245 245 . 37.592 57.711 -8.284 1.00 11.41 1 .  
.  
ATOM 5083 CG1 CG1 . VAL VAL VAL B B 245 245 . 38.436 59.053 -8.270 1.00 12.20 1 .  
.  
ATOM 5084 CG2 CG2 . VAL VAL VAL B B 245 245 . 38.232 56.706 -9.286 1.00 12.15 1 .  
.  
ATOM 5085 C C . VAL VAL VAL B B 245 245 . 37.060 58.051 -5.815 1.00 11.85 1 .  
.  
ATOM 5086 O O . VAL VAL VAL B B 245 245 . 37.912 58.738 -5.182 1.00 13.52 1 .  
.  
ATOM 5087 N N . ALA ALA ALA B B 246 246 . 35.726 58.161 -5.740 1.00 11.27 1 .  
.  
ATOM 5088 CA CA . ALA ALA ALA B B 246 246 . 35.062 59.213 -4.891 1.00 10.87 1 .  
.

ATOM 5089 CB CB . ALA ALA ALA B B 246 246 . 35.214 58.887 -3.348 1.00 14.03 1 .  
.ATOM 5090 C C . ALA ALA ALA B B 246 246 . 35.655 60.590 -5.240 1.00 12.84 1 .  
.ATOM 5091 O O . ALA ALA ALA B B 246 246 . 36.063 61.391 -4.360 1.00 13.96 1 .  
.ATOM 5092 N N . ALA ALA ALA B B 247 247 . 35.573 60.965 -6.520 1.00 12.56 1 .  
.ATOM 5093 CA CA . ALA ALA ALA B B 247 247 . 36.302 62.156 -7.045 1.00 12.65 1 .  
.ATOM 5094 CB CB . ALA ALA ALA B B 247 247 . 36.202 62.228 -8.585 1.00 11.71 1 .  
.ATOM 5095 C C . ALA ALA ALA B B 247 247 . 35.708 63.462 -6.422 1.00 13.60 1 .  
.ATOM 5096 O O . ALA ALA ALA B B 247 247 . 36.392 64.469 -6.476 1.00 14.44 1 .  
.ATOM 5097 N N . SER SER SER B B 248 248 . 34.463 63.413 -5.895 1.00 12.87 1 .  
.ATOM 5098 CA CA . SER SER SER B B 248 248 . 33.877 64.655 -5.283 1.00 15.34 1 .  
.ATOM 5099 CB CB . SER SER SER B B 248 248 . 32.439 64.432 -4.828 1.00 15.37 1 .  
.ATOM 5100 OG OG . SER SER SER B B 248 248 . 31.583 64.069 -5.924 1.00 14.38 1 .  
.ATOM 5101 C C . SER SER SER B B 248 248 . 34.681 65.086 -4.089 1.00 16.95 1 .  
.ATOM 5102 O O . SER SER SER B B 248 248 . 34.626 66.286 -3.719 1.00 18.05 1 .  
.ATOM 5103 N N . GLU GLU GLU B B 249 249 . 35.395 64.154 -3.465 1.00 15.88 1 .  
.ATOM 5104 CA CA . GLU GLU GLU B B 249 249 . 36.276 64.473 -2.303 1.00 16.13 1 .  
.ATOM 5105 CB CB . GLU GLU GLU B B 249 249 . 36.651 63.165 -1.540 1.00 14.48 1 .  
.ATOM 5106 CG CG . GLU GLU GLU B B 249 249 . 35.409 62.389 -0.970 1.00 16.46 1 .  
.ATOM 5107 CD CD . GLU GLU GLU B B 249 249 . 34.691 63.107 0.115 1.00 23.16 1 .  
.ATOM 5108 OE1 OE1 . GLU GLU GLU B B 249 249 . 35.426 63.686 0.927 1.00 29.70 1 .  
.ATOM 5109 OE2 OE2 . GLU GLU GLU B B 249 249 . 33.409 63.072 0.221 1.00 25.10 1 .  
.ATOM 5110 C C . GLU GLU GLU B B 249 249 . 37.549 65.271 -2.689 1.00 16.71 1 .  
.ATOM 5111 O O . GLU GLU GLU B B 249 249 . 38.195 65.931 -1.808 1.00 20.83 1 .  
.ATOM 5112 N N . PHE PHE PHE B B 250 250 . 37.944 65.265 -3.943 1.00 17.12 1 .  
.ATOM 5113 CA CA . PHE PHE PHE B B 250 250 . 39.185 65.954 -4.341 1.00 16.49 1 .  
.ATOM 5114 CB CB . PHE PHE PHE B B 250 250 . 40.409 65.042 -4.576 1.00 18.21 1 .  
.ATOM 5115 CG CG . PHE PHE PHE B B 250 250 . 40.212 63.930 -5.577 1.00 15.08 1 .  
.ATOM 5116 CD1 CD1 . PHE PHE PHE B B 250 250 . 40.013 62.594 -5.127 1.00 19.37 1 .  
.ATOM 5117 CE1 CE1 . PHE PHE PHE B B 250 250 . 39.874 61.585 -6.021 1.00 18.68 1 .  
.ATOM 5118 CZ CZ . PHE PHE PHE B B 250 250 . 39.964 61.854 -7.422 1.00 17.89 1 .  
.

ATOM 5119 CE2 CE2 . PHE PHE PHE B B 250 250 . 40.171 63.174 -7.904 1.00 17.79 1 .  
.  
ATOM 5120 CD2 CD2 . PHE PHE PHE B B 250 250 . 40.318 64.204 -6.948 1.00 17.18 1 .  
.  
ATOM 5121 C C . PHE PHE PHE B B 250 250 . 38.967 66.976 -5.474 1.00 16.04 1 .  
.  
ATOM 5122 O O . PHE PHE PHE B B 250 250 . 39.917 67.416 -6.102 1.00 17.77 1 .  
.  
ATOM 5123 N N . TYR TYR TYR B B 251 251 . 37.704 67.277 -5.739 1.00 16.94 1 .  
.  
ATOM 5124 CA CA . TYR TYR TYR B B 251 251 . 37.405 68.316 -6.746 1.00 17.37 1 .  
.  
ATOM 5125 CB CB . TYR TYR TYR B B 251 251 . 35.919 68.283 -6.991 1.00 17.72 1 .  
.  
ATOM 5126 CG CG . TYR TYR TYR B B 251 251 . 35.421 69.363 -7.935 1.00 18.50 1 .  
.  
ATOM 5127 CD1 CD1 . TYR TYR TYR B B 251 251 . 35.509 69.218 -9.329 1.00 19.09 1 .  
.  
ATOM 5128 CE1 CE1 . TYR TYR TYR B B 251 251 . 35.027 70.189 -10.163 1.00 22.21 1 .  
.  
ATOM 5129 CZ CZ . TYR TYR TYR B B 251 251 . 34.438 71.333 -9.598 1.00 26.75 1 .  
.  
ATOM 5130 OH OH . TYR TYR TYR B B 251 251 . 33.936 72.400 -10.369 1.00 30.08 1 .  
.  
ATOM 5131 CE2 CE2 . TYR TYR TYR B B 251 251 . 34.374 71.511 -8.245 1.00 28.00 1 .  
.  
ATOM 5132 CD2 CD2 . TYR TYR TYR B B 251 251 . 34.840 70.524 -7.415 1.00 24.71 1 .  
.  
ATOM 5133 C C . TYR TYR TYR B B 251 251 . 37.768 69.684 -6.103 1.00 17.73 1 .  
.  
ATOM 5134 O O . TYR TYR TYR B B 251 251 . 37.290 69.943 -4.977 1.00 20.49 1 .  
.  
ATOM 5135 N N . ARG ARG ARG B B 252 252 . 38.486 70.527 -6.834 1.00 16.83 1 .  
.  
ATOM 5136 CA CA . ARG ARG ARG B B 252 252 . 38.981 71.863 -6.324 1.00 18.63 1 .  
.  
ATOM 5137 CB CB . ARG ARG ARG B B 252 252 . 40.492 71.728 -5.897 1.00 19.42 1 .  
.  
ATOM 5138 CG CG . ARG ARG ARG B B 252 252 . 40.707 70.763 -4.752 1.00 23.22 1 .  
.  
ATOM 5139 CD CD . ARG ARG ARG B B 252 252 . 39.941 71.107 -3.498 1.00 26.22 1 .  
.  
ATOM 5140 NE NE . ARG ARG ARG B B 252 252 . 40.367 70.233 -2.387 1.00 30.30 1 .  
.  
ATOM 5141 CZ CZ . ARG ARG ARG B B 252 252 . 39.580 69.312 -1.835 1.00 26.96 1 .  
.  
ATOM 5142 NH1 NH1 . ARG ARG ARG B B 252 252 . 38.319 69.066 -2.309 1.00 29.35 1 .  
.  
ATOM 5143 NH2 NH2 . ARG ARG ARG B B 252 252 . 40.064 68.553 -0.878 1.00 28.82 1 .  
.  
ATOM 5144 C C . ARG ARG ARG B B 252 252 . 38.897 72.844 -7.426 1.00 18.63 1 .  
.  
ATOM 5145 O O . ARG ARG ARG B B 252 252 . 39.643 72.662 -8.447 1.00 17.96 1 .  
.  
ATOM 5146 N N . ASP ASP ASP B B 253 253 . 38.045 73.906 -7.294 1.00 20.60 1 .  
.  
ATOM 5147 CA CA . ASP ASP ASP B B 253 253 . 38.086 74.982 -8.284 1.00 21.82 1 .  
.  
ATOM 5148 CB CB . ASP ASP ASP B B 253 253 . 39.468 75.775 -8.221 1.00 23.96 1 .  
.  
.

ATOM 5149 CG CG . ASP ASP ASP B B 253 253 . 39.745 76.437 -6.850 1.00 30.59 1 .  
.ATOM 5150 OD1 OD1 . ASP ASP ASP B B 253 253 . 40.981 76.741 -6.599 1.00 38.69 1 .  
.ATOM 5151 OD2 OD2 . ASP ASP ASP B B 253 253 . 38.791 76.660 -6.044 1.00 32.72 1 .  
.ATOM 5152 C C . ASP ASP ASP B B 253 253 . 37.930 74.528 -9.716 1.00 20.80 1 .  
.ATOM 5153 O O . ASP ASP ASP B B 253 253 . 38.616 75.053 -10.590 1.00 20.17 1 .  
.ATOM 5154 N N . GLY GLY GLY B B 254 254 . 37.087 73.512 -9.941 1.00 17.70 1 .  
.ATOM 5155 CA CA . GLY GLY GLY B B 254 254 . 36.808 73.077 -11.321 1.00 18.58 1 .  
.ATOM 5156 C C . GLY GLY GLY B B 254 254 . 37.814 72.053 -11.867 1.00 18.21 1 .  
.ATOM 5157 O O . GLY GLY GLY B B 254 254 . 37.709 71.653 -13.008 1.00 19.94 1 .  
.ATOM 5158 N N . LYS LYS LYS B B 255 255 . 38.810 71.687 -11.031 1.00 17.59 1 .  
.ATOM 5159 CA CA . LYS LYS LYS B B 255 255 . 39.865 70.743 -11.400 1.00 18.48 1 .  
.ATOM 5160 CB CB . LYS LYS LYS B B 255 255 . 41.244 71.451 -11.575 1.00 19.67 1 .  
.ATOM 5161 CG CG . LYS LYS LYS B B 255 255 . 41.300 72.405 -12.756 1.00 21.53 1 .  
.ATOM 5162 CD CD . LYS LYS LYS B B 255 255 . 42.653 73.080 -12.782 1.00 27.54 1 .  
.ATOM 5163 CE CE . LYS LYS LYS B B 255 255 . 42.901 73.858 -14.074 1.00 33.94 1 .  
.ATOM 5164 NZ NZ . LYS LYS LYS B B 255 255 . 44.408 74.211 -14.201 1.00 39.95 1 .  
.ATOM 5165 C C . LYS LYS LYS B B 255 255 . 39.897 69.655 -10.325 1.00 18.39 1 .  
.ATOM 5166 O O . LYS LYS LYS B B 255 255 . 39.042 69.591 -9.421 1.00 18.81 1 .  
.ATOM 5167 N N . TYR TYR TYR B B 256 256 . 40.936 68.823 -10.370 1.00 18.11 1 .  
.ATOM 5168 CA CA . TYR TYR TYR B B 256 256 . 41.036 67.701 -9.463 1.00 17.73 1 .  
.ATOM 5169 CB CB . TYR TYR TYR B B 256 256 . 40.679 66.379 -10.205 1.00 16.92 1 .  
.ATOM 5170 CG CG . TYR TYR TYR B B 256 256 . 39.197 66.352 -10.631 1.00 13.82 1 .  
.ATOM 5171 CD1 CD1 . TYR TYR TYR B B 256 256 . 38.224 65.892 -9.753 1.00 14.32 1 .  
.ATOM 5172 CE1 CE1 . TYR TYR TYR B B 256 256 . 36.878 65.885 -10.073 1.00 12.71 1 .  
.ATOM 5173 CZ CZ . TYR TYR TYR B B 256 256 . 36.482 66.344 -11.357 1.00 13.15 1 .  
.ATOM 5174 OH OH . TYR TYR TYR B B 256 256 . 35.157 66.314 -11.663 1.00 11.57 1 .  
.ATOM 5175 CE2 CE2 . TYR TYR TYR B B 256 256 . 37.428 66.821 -12.263 1.00 13.48 1 .  
.ATOM 5176 CD2 CD2 . TYR TYR TYR B B 256 256 . 38.787 66.808 -11.893 1.00 14.78 1 .  
.ATOM 5177 C C . TYR TYR TYR B B 256 256 . 42.456 67.641 -8.901 1.00 18.36 1 .  
.ATOM 5178 O O . TYR TYR TYR B B 256 256 . 43.479 67.753 -9.626 1.00 19.26 1 .  
.











ATOM 5299 CG2 CG2 . THR THR THR B B 271 271 . 42.473 70.634 -17.133 1.00 22.80 1 .  
.ATOM 5300 C C . THR THR THR B B 271 271 . 40.985 67.436 -15.456 1.00 20.89 1 .  
.ATOM 5301 O O . THR THR THR B B 271 271 . 41.597 66.339 -15.287 1.00 20.42 1 .  
.ATOM 5302 N N . GLY GLY GLY B B 272 272 . 39.671 67.496 -15.640 1.00 19.66 1 .  
.ATOM 5303 CA CA . GLY GLY GLY B B 272 272 . 38.917 66.254 -15.766 1.00 18.77 1 .  
.ATOM 5304 C C . GLY GLY GLY B B 272 272 . 39.418 65.421 -16.951 1.00 19.24 1 .  
.ATOM 5305 O O . GLY GLY GLY B B 272 272 . 39.338 64.195 -16.896 1.00 17.46 1 .  
.ATOM 5306 N N . ASP ASP ASP B B 273 273 . 39.887 66.079 -18.023 1.00 17.71 1 .  
.ATOM 5307 CA CA . ASP ASP ASP B B 273 273 . 40.398 65.388 -19.190 1.00 21.69 1 .  
.ATOM 5308 CB CB . ASP ASP ASP B B 273 273 . 40.689 66.446 -20.255 1.00 23.81 1 .  
.ATOM 5309 CG CG . ASP ASP ASP B B 273 273 . 41.160 65.835 -21.593 1.00 33.66 1 .  
.ATOM 5310 OD1 OD1 . ASP ASP ASP B B 273 273 . 40.328 65.192 -22.270 1.00 41.63 1 .  
.ATOM 5311 OD2 OD2 . ASP ASP ASP B B 273 273 . 42.326 66.084 -22.041 1.00 46.75 1 .  
.ATOM 5312 C C . ASP ASP ASP B B 273 273 . 41.659 64.604 -18.869 1.00 21.07 1 .  
.ATOM 5313 O O . ASP ASP ASP B B 273 273 . 41.849 63.426 -19.304 1.00 20.16 1 .  
.ATOM 5314 N N . GLN GLN GLN B B 274 274 . 42.506 65.234 -18.075 1.00 20.55 1 .  
.ATOM 5315 CA CA . GLN GLN GLN B B 274 274 . 43.770 64.618 -17.607 1.00 20.63 1 .  
.ATOM 5316 CB CB . GLN GLN GLN B B 274 274 . 44.644 65.623 -16.858 1.00 21.57 1 .  
.ATOM 5317 CG CG . GLN GLN GLN B B 274 274 . 45.214 66.620 -17.807 1.00 24.27 1 .  
.ATOM 5318 CD CD . GLN GLN GLN B B 274 274 . 45.951 67.708 -17.148 1.00 26.58 1 .  
.ATOM 5319 OE1 OE1 . GLN GLN GLN B B 274 274 . 45.421 68.448 -16.321 1.00 24.46 1 .  
.ATOM 5320 NE2 NE2 . GLN GLN GLN B B 274 274 . 47.220 67.861 -17.549 1.00 31.30 1 .  
.ATOM 5321 C C . GLN GLN GLN B B 274 274 . 43.441 63.390 -16.696 1.00 19.30 1 .  
.ATOM 5322 O O . GLN GLN GLN B B 274 274 . 44.032 62.322 -16.885 1.00 18.93 1 .  
.ATOM 5323 N N . LEU LEU LEU B B 275 275 . 42.454 63.552 -15.809 1.00 16.63 1 .  
.ATOM 5324 CA CA . LEU LEU LEU B B 275 275 . 42.049 62.499 -14.905 1.00 16.25 1 .  
.ATOM 5325 CB CB . LEU LEU LEU B B 275 275 . 41.031 63.024 -13.950 1.00 15.49 1 .  
.ATOM 5326 CG CG . LEU LEU LEU B B 275 275 . 40.546 62.135 -12.856 1.00 14.57 1 .  
.ATOM 5327 CD1 CD1 . LEU LEU LEU B B 275 275 . 41.663 61.461 -12.024 1.00 16.80 1 .  
.ATOM 5328 CD2 CD2 . LEU LEU LEU B B 275 275 . 39.497 62.933 -11.976 1.00 12.93 1 .  
.



ATOM 5359 O O . TYR TYR TYR B B 279 279 . 41.949 53.986 -17.079 1.00 13.24 1 .  
.ATOM 5360 N N . GLN GLN GLN B B 280 280 . 42.022 55.852 -18.409 1.00 12.96 1 .  
.ATOM 5361 CA CA . GLN GLN GLN B B 280 280 . 42.309 55.031 -19.594 1.00 15.72 1 .  
.ATOM 5362 CB CB . GLN GLN GLN B B 280 280 . 42.291 55.885 -20.870 1.00 14.83 1 .  
.ATOM 5363 CG CG . GLN GLN GLN B B 280 280 . 40.771 56.241 -21.089 1.00 20.52 1 .  
.ATOM 5364 CD CD . GLN GLN GLN B B 280 280 . 40.520 56.952 -22.313 1.00 33.50 1 .  
.ATOM 5365 OE1 OE1 . GLN GLN GLN B B 280 280 . 39.615 56.571 -23.118 1.00 38.74 1 .  
.ATOM 5366 NE2 NE2 . GLN GLN GLN B B 280 280 . 41.268 58.034 -22.505 1.00 38.41 1 .  
.ATOM 5367 C C . GLN GLN GLN B B 280 280 . 43.588 54.248 -19.468 1.00 15.93 1 .  
.ATOM 5368 O O . GLN GLN GLN B B 280 280 . 43.617 53.073 -19.872 1.00 17.48 1 .  
.ATOM 5369 N N . ASP ASP ASP B B 281 281 . 44.598 54.824 -18.856 1.00 15.58 1 .  
.ATOM 5370 CA CA . ASP ASP ASP B B 281 281 . 45.859 54.068 -18.625 1.00 17.33 1 .  
.ATOM 5371 CB CB . ASP ASP ASP B B 281 281 . 46.987 54.974 -18.134 1.00 19.05 1 .  
.ATOM 5372 CG CG . ASP ASP ASP B B 281 281 . 47.469 56.003 -19.215 1.00 25.11 1 .  
.ATOM 5373 OD1 OD1 . ASP ASP ASP B B 281 281 . 47.256 55.855 -20.443 1.00 27.66 1 .  
.ATOM 5374 OD2 OD2 . ASP ASP ASP B B 281 281 . 48.075 57.004 -18.776 1.00 31.04 1 .  
.ATOM 5375 C C . ASP ASP ASP B B 281 281 . 45.670 52.911 -17.663 1.00 17.68 1 .  
.ATOM 5376 O O . ASP ASP ASP B B 281 281 . 46.133 51.767 -17.919 1.00 17.49 1 .  
.ATOM 5377 N N . PHE PHE PHE B B 282 282 . 44.882 53.151 -16.619 1.00 15.35 1 .  
.ATOM 5378 CA CA . PHE PHE PHE B B 282 282 . 44.614 52.075 -15.664 1.00 15.21 1 .  
.ATOM 5379 CB CB . PHE PHE PHE B B 282 282 . 43.716 52.579 -14.524 1.00 16.49 1 .  
.ATOM 5380 CG CG . PHE PHE PHE B B 282 282 . 44.390 53.588 -13.608 1.00 18.41 1 .  
.ATOM 5381 CD1 CD1 . PHE PHE PHE B B 282 282 . 43.600 54.264 -12.671 1.00 17.17 1 .  
.ATOM 5382 CE1 CE1 . PHE PHE PHE B B 282 282 . 44.231 55.190 -11.772 1.00 22.32 1 .  
.ATOM 5383 CZ CZ . PHE PHE PHE B B 282 282 . 45.621 55.426 -11.846 1.00 22.40 1 .  
.ATOM 5384 CE2 CE2 . PHE PHE PHE B B 282 282 . 46.415 54.771 -12.820 1.00 23.79 1 .  
.ATOM 5385 CD2 CD2 . PHE PHE PHE B B 282 282 . 45.798 53.869 -13.673 1.00 19.09 1 .  
.ATOM 5386 C C . PHE PHE PHE B B 282 282 . 43.905 50.913 -16.321 1.00 15.06 1 .  
.ATOM 5387 O O . PHE PHE PHE B B 282 282 . 44.207 49.744 -16.011 1.00 16.32 1 .  
.ATOM 5388 N N . VAL VAL VAL B B 283 283 . 42.946 51.203 -17.215 1.00 13.06 1 .  
.

ATOM 5389 CA CA . VAL VAL VAL B B 283 283 . 42.123 50.168 -17.805 1.00 14.50 1 .  
.ATOM 5390 CB CB . VAL VAL VAL B B 283 283 . 40.894 50.750 -18.459 1.00 13.98 1 .  
.ATOM 5391 CG1 CG1 . VAL VAL VAL B B 283 283 . 40.092 49.675 -19.371 1.00 16.25 1 .  
.ATOM 5392 CG2 CG2 . VAL VAL VAL B B 283 283 . 39.937 51.288 -17.368 1.00 12.08 1 .  
.ATOM 5393 C C . VAL VAL VAL B B 283 283 . 42.987 49.368 -18.798 1.00 14.75 1 .  
.ATOM 5394 O O . VAL VAL VAL B B 283 283 . 42.764 48.172 -18.960 1.00 15.74 1 .  
.ATOM 5395 N N . ARG ARG ARG B B 284 284 . 43.922 50.050 -19.449 1.00 15.54 1 .  
.ATOM 5396 CA CA . ARG ARG ARG B B 284 284 . 44.798 49.364 -20.385 1.00 16.63 1 .  
.ATOM 5397 CB CB . ARG ARG ARG B B 284 284 . 45.572 50.419 -21.231 1.00 17.37 1 .  
.ATOM 5398 CG CG . ARG ARG ARG B B 284 284 . 46.628 49.833 -22.115 1.00 17.15 1 .  
.ATOM 5399 CD CD . ARG ARG ARG B B 284 284 . 46.079 48.909 -23.305 1.00 23.77 1 .  
.ATOM 5400 NE NE . ARG ARG ARG B B 284 284 . 45.077 49.524 -24.215 1.00 26.76 1 .  
.ATOM 5401 CZ CZ . ARG ARG ARG B B 284 284 . 45.384 50.282 -25.288 1.00 28.77 1 .  
.ATOM 5402 NH1 NH1 . ARG ARG ARG B B 284 284 . 46.681 50.489 -25.612 1.00 30.26 1 .  
.ATOM 5403 NH2 NH2 . ARG ARG ARG B B 284 284 . 44.403 50.800 -26.061 1.00 30.21 1 .  
.ATOM 5404 C C . ARG ARG ARG B B 284 284 . 45.808 48.459 -19.645 1.00 16.53 1 .  
.ATOM 5405 O O . ARG ARG ARG B B 284 284 . 46.107 47.340 -20.074 1.00 18.25 1 .  
.ATOM 5406 N N . ASP ASP ASP B B 285 285 . 46.288 48.916 -18.504 1.00 17.08 1 .  
.ATOM 5407 CA CA . ASP ASP ASP B B 285 285 . 47.407 48.283 -17.802 1.00 16.73 1 .  
.ATOM 5408 CB CB . ASP ASP ASP B B 285 285 . 48.257 49.355 -17.184 1.00 16.45 1 .  
.ATOM 5409 CG CG . ASP ASP ASP B B 285 285 . 49.036 50.167 -18.185 1.00 20.94 1 .  
.ATOM 5410 OD1 OD1 . ASP ASP ASP B B 285 285 . 49.109 49.780 -19.387 1.00 24.04 1 .  
.ATOM 5411 OD2 OD2 . ASP ASP ASP B B 285 285 . 49.615 51.210 -17.758 1.00 25.37 1 .  
.ATOM 5412 C C . ASP ASP ASP B B 285 285 . 47.017 47.249 -16.719 1.00 17.46 1 .  
.ATOM 5413 O O . ASP ASP ASP B B 285 285 . 47.896 46.471 -16.259 1.00 17.73 1 .  
.ATOM 5414 N N . TYR TYR TYR B B 286 286 . 45.778 47.289 -16.266 1.00 17.04 1 .  
.ATOM 5415 CA CA . TYR TYR TYR B B 286 286 . 45.308 46.483 -15.138 1.00 15.43 1 .  
.ATOM 5416 CB CB . TYR TYR TYR B B 286 286 . 45.210 47.348 -13.848 1.00 15.78 1 .  
.ATOM 5417 CG CG . TYR TYR TYR B B 286 286 . 46.554 47.853 -13.415 1.00 18.48 1 .  
.ATOM 5418 CD1 CD1 . TYR TYR TYR B B 286 286 . 47.451 46.989 -12.781 1.00 20.31 1 .  
.

ATOM 5419 CE1 CE1 . TYR TYR TYR B B 286 286 . 48.728 47.423 -12.434 1.00 22.26 1 .  
.ATOM 5420 CZ CZ . TYR TYR TYR B B 286 286 . 49.106 48.745 -12.746 1.00 25.51 1 .  
.ATOM 5421 OH OH . TYR TYR TYR B B 286 286 . 50.342 49.185 -12.418 1.00 34.04 1 .  
.ATOM 5422 CE2 CE2 . TYR TYR TYR B B 286 286 . 48.237 49.637 -13.400 1.00 23.84 1 .  
.ATOM 5423 CD2 CD2 . TYR TYR TYR B B 286 286 . 46.957 49.167 -13.730 1.00 18.95 1 .  
.ATOM 5424 C C . TYR TYR TYR B B 286 286 . 43.907 46.029 -15.467 1.00 15.95 1 .  
.ATOM 5425 O O . TYR TYR TYR B B 286 286 . 43.206 46.627 -16.314 1.00 15.83 1 .  
.ATOM 5426 N N . PRO PRO PRO B B 287 287 . 43.460 44.929 -14.839 1.00 14.94 1 .  
.ATOM 5427 CA CA . PRO PRO PRO B B 287 287 . 42.156 44.413 -15.162 1.00 14.27 1 .  
.ATOM 5428 CB CB . PRO PRO PRO B B 287 287 . 42.224 42.904 -14.641 1.00 15.59 1 .  
.ATOM 5429 CG CG . PRO PRO PRO B B 287 287 . 43.198 43.020 -13.483 1.00 16.54 1 .  
.ATOM 5430 CD CD . PRO PRO PRO B B 287 287 . 44.212 44.055 -13.907 1.00 16.91 1 .  
.ATOM 5431 C C . PRO PRO PRO B B 287 287 . 41.033 45.182 -14.444 1.00 13.79 1 .  
.ATOM 5432 O O . PRO PRO PRO B B 287 287 . 40.197 44.597 -13.773 1.00 13.97 1 .  
.ATOM 5433 N N . VAL VAL VAL B B 288 288 . 40.972 46.496 -14.689 1.00 13.63 1 .  
.ATOM 5434 CA CA . VAL VAL VAL B B 288 288 . 39.961 47.334 -14.054 1.00 12.23 1 .  
.ATOM 5435 CB CB . VAL VAL VAL B B 288 288 . 40.460 48.805 -13.996 1.00 11.49 1 .  
.ATOM 5436 CG1 CG1 . VAL VAL VAL B B 288 288 . 39.326 49.746 -13.585 1.00 13.53 1 .  
.ATOM 5437 CG2 CG2 . VAL VAL VAL B B 288 288 . 41.682 48.910 -13.042 1.00 12.36 1 .  
.ATOM 5438 C C . VAL VAL VAL B B 288 288 . 38.728 47.226 -14.916 1.00 12.35 1 .  
.ATOM 5439 O O . VAL VAL VAL B B 288 288 . 38.785 47.579 -16.096 1.00 15.17 1 .  
.ATOM 5440 N N . VAL VAL VAL B B 289 289 . 37.616 46.801 -14.365 1.00 11.25 1 .  
.ATOM 5441 CA CA . VAL VAL VAL B B 289 289 . 36.362 46.577 -15.112 1.00 9.99 1 .  
.ATOM 5442 CB CB . VAL VAL VAL B B 289 289 . 35.859 45.126 -14.961 1.00 11.92 1 .  
.ATOM 5443 CG1 CG1 . VAL VAL VAL B B 289 289 . 36.962 44.133 -15.456 1.00 14.87 1 .  
.ATOM 5444 CG2 CG2 . VAL VAL VAL B B 289 289 . 35.451 44.789 -13.437 1.00 11.88 1 .  
.ATOM 5445 C C . VAL VAL VAL B B 289 289 . 35.271 47.559 -14.704 1.00 11.39 1 .  
.ATOM 5446 O O . VAL VAL VAL B B 289 289 . 34.201 47.564 -15.294 1.00 11.54 1 .  
.ATOM 5447 N N . SER SER SER B B 290 290 . 35.551 48.359 -13.637 1.00 12.13 1 .  
.ATOM 5448 CA CA . SER SER SER B B 290 290 . 34.469 49.211 -13.109 1.00 10.19 1 .  
.

ATOM 5449 CB CB . SER SER SER B B 290 290 . 33.606 48.343 -12.081 1.00 10.73 1 .  
.ATOM 5450 OG OG . SER SER SER B B 290 290 . 32.575 49.174 -11.520 1.00 12.48 1 .  
.ATOM 5451 C C . SER SER SER B B 290 290 . 35.127 50.339 -12.379 1.00 9.47 1 .  
.ATOM 5452 O O . SER SER SER B B 290 290 . 36.087 50.082 -11.589 1.00 10.73 1 .  
.ATOM 5453 N N . ILE ILE ILE B B 291 291 . 34.640 51.557 -12.627 1.00 8.41 1 .  
.ATOM 5454 CA CA . ILE ILE ILE B B 291 291 . 35.147 52.749 -11.874 1.00 9.44 1 .  
.ATOM 5455 CB CB . ILE ILE ILE B B 291 291 . 36.093 53.701 -12.735 1.00 9.65 1 .  
.ATOM 5456 CG1 CG1 . ILE ILE ILE B B 291 291 . 37.331 52.916 -13.235 1.00 9.98 1 .  
.ATOM 5457 CD CD . ILE ILE ILE B B 291 291 . 38.204 53.719 -14.204 1.00 12.05 1 .  
.ATOM 5458 CG2 CG2 . ILE ILE ILE B B 291 291 . 36.484 54.938 -11.931 1.00 9.56 1 .  
.ATOM 5459 C C . ILE ILE ILE B B 291 291 . 33.894 53.496 -11.409 1.00 9.63 1 .  
.ATOM 5460 O O . ILE ILE ILE B B 291 291 . 33.037 53.876 -12.194 1.00 10.78 1 .  
.ATOM 5461 N N . GLU GLU GLU B B 292 292 . 33.847 53.749 -10.100 1.00 9.11 1 .  
.ATOM 5462 CA CA . GLU GLU GLU B B 292 292 . 32.728 54.464 -9.478 1.00 8.26 1 .  
.ATOM 5463 CB CB . GLU GLU GLU B B 292 292 . 32.365 53.694 -8.162 1.00 8.05 1 .  
.ATOM 5464 CG CG . GLU GLU GLU B B 292 292 . 31.318 54.431 -7.291 1.00 8.79 1 .  
.ATOM 5465 CD CD . GLU GLU GLU B B 292 292 . 31.234 53.764 -5.943 1.00 13.70 1 .  
.ATOM 5466 OE1 OE1 . GLU GLU GLU B B 292 292 . 31.573 52.530 -5.808 1.00 13.50 1 .  
.ATOM 5467 OE2 OE2 . GLU GLU GLU B B 292 292 . 30.837 54.469 -4.985 1.00 12.83 1 .  
.ATOM 5468 C C . GLU GLU GLU B B 292 292 . 33.208 55.903 -9.124 1.00 8.72 1 .  
.ATOM 5469 O O . GLU GLU GLU B B 292 292 . 34.348 56.144 -8.705 1.00 10.78 1 .  
.ATOM 5470 N N . ASP ASP ASP B B 293 293 . 32.277 56.830 -9.299 1.00 9.73 1 .  
.ATOM 5471 CA CA . ASP ASP ASP B B 293 293 . 32.525 58.278 -9.051 1.00 10.24 1 .  
.ATOM 5472 CB CB . ASP ASP ASP B B 293 293 . 32.415 58.588 -7.541 1.00 12.41 1 .  
.ATOM 5473 CG CG . ASP ASP ASP B B 293 293 . 30.963 58.801 -7.112 1.00 12.73 1 .  
.ATOM 5474 OD1 OD1 . ASP ASP ASP B B 293 293 . 30.009 58.891 -7.928 1.00 12.39 1 .  
.ATOM 5475 OD2 OD2 . ASP ASP ASP B B 293 293 . 30.723 58.780 -5.890 1.00 13.39 1 .  
.ATOM 5476 C C . ASP ASP ASP B B 293 293 . 33.841 58.743 -9.615 1.00 11.33 1 .  
.ATOM 5477 O O . ASP ASP ASP B B 293 293 . 34.662 59.337 -8.951 1.00 10.85 1 .  
.ATOM 5478 N N . PRO PRO PRO B B 294 294 . 34.023 58.567 -10.920 1.00 10.29 1 .  
.



ATOM 5509 OE1 OE1 . GLN GLN GLN B B 297 297 . 28.193 65.144 -4.135 1.00 15.03 1 .  
.  
ATOM 5510 NE2 NE2 . GLN GLN GLN B B 297 297 . 29.615 66.850 -4.181 1.00 16.23 1 .  
.  
ATOM 5511 C C . GLN GLN GLN B B 297 297 . 28.113 65.829 -9.303 1.00 11.41 1 .  
.  
ATOM 5512 O O . GLN GLN GLN B B 297 297 . 26.951 65.612 -9.658 1.00 12.20 1 .  
.  
ATOM 5513 N N . ASP ASP ASP B B 298 298 . 28.777 66.979 -9.622 1.00 11.82 1 .  
.  
ATOM 5514 CA CA . ASP ASP ASP B B 298 298 . 28.157 67.996 -10.463 1.00 12.23 1 .  
.  
ATOM 5515 CB CB . ASP ASP ASP B B 298 298 . 28.202 69.389 -9.727 1.00 13.20 1 .  
.  
ATOM 5516 CG CG . ASP ASP ASP B B 298 298 . 27.233 69.484 -8.528 1.00 13.56 1 .  
.  
ATOM 5517 OD1 OD1 . ASP ASP ASP B B 298 298 . 26.025 69.174 -8.669 1.00 16.28 1 .  
.  
ATOM 5518 OD2 OD2 . ASP ASP ASP B B 298 298 . 27.687 69.966 -7.451 1.00 18.95 1 .  
.  
ATOM 5519 C C . ASP ASP ASP B B 298 298 . 28.846 68.114 -11.819 1.00 10.32 1 .  
.  
ATOM 5520 O O . ASP ASP ASP B B 298 298 . 28.412 68.954 -12.664 1.00 11.13 1 .  
.  
ATOM 5521 N N . ASP ASP ASP B B 299 299 . 29.918 67.347 -12.068 1.00 13.00 1 .  
.  
ATOM 5522 CA CA . ASP ASP ASP B B 299 299 . 30.710 67.520 -13.293 1.00 10.77 1 .  
.  
ATOM 5523 CB CB . ASP ASP ASP B B 299 299 . 32.156 67.201 -13.000 1.00 11.30 1 .  
.  
ATOM 5524 CG CG . ASP ASP ASP B B 299 299 . 33.124 67.522 -14.153 1.00 10.56 1 .  
.  
ATOM 5525 OD1 OD1 . ASP ASP ASP B B 299 299 . 32.768 67.994 -15.235 1.00 13.41 1 .  
.  
ATOM 5526 OD2 OD2 . ASP ASP ASP B B 299 299 . 34.312 67.287 -13.919 1.00 13.86 1 .  
.  
ATOM 5527 C C . ASP ASP ASP B B 299 299 . 30.121 66.633 -14.421 1.00 12.31 1 .  
.  
ATOM 5528 O O . ASP ASP ASP B B 299 299 . 30.791 65.734 -14.949 1.00 10.82 1 .  
.  
ATOM 5529 N N . TRP TRP TRP B B 300 300 . 28.865 66.919 -14.765 1.00 11.35 1 .  
.  
ATOM 5530 CA CA . TRP TRP TRP B B 300 300 . 28.102 66.087 -15.683 1.00 10.87 1 .  
.  
ATOM 5531 CB CB . TRP TRP TRP B B 300 300 . 26.737 66.714 -15.935 1.00 11.04 1 .  
.  
ATOM 5532 CG CG . TRP TRP TRP B B 300 300 . 25.858 66.597 -14.738 1.00 10.57 1 .  
.  
ATOM 5533 CD1 CD1 . TRP TRP TRP B B 300 300 . 25.677 67.571 -13.717 1.00 11.30 1 .  
.  
ATOM 5534 NE1 NE1 . TRP TRP TRP B B 300 300 . 24.800 67.093 -12.791 1.00 14.08 1 .  
.  
ATOM 5535 CE2 CE2 . TRP TRP TRP B B 300 300 . 24.410 65.810 -13.165 1.00 11.10 1 .  
.  
ATOM 5536 CD2 CD2 . TRP TRP TRP B B 300 300 . 25.080 65.488 -14.384 1.00 12.45 1 .  
.  
ATOM 5537 CE3 CE3 . TRP TRP TRP B B 300 300 . 24.831 64.244 -14.999 1.00 13.00 1 .  
.  
ATOM 5538 CZ3 CZ3 . TRP TRP TRP B B 300 300 . 23.961 63.296 -14.318 1.00 12.11 1 .  
.  
.



ATOM 5539 CH2 CH2 . TRP TRP TRP B B 300 300 . 23.304 63.642 -13.138 1.00 15.32 1 .  
.  
ATOM 5540 CZ2 CZ2 . TRP TRP TRP B B 300 300 . 23.497 64.922 -12.541 1.00 14.66 1 .  
.  
ATOM 5541 C C . TRP TRP TRP B B 300 300 . 28.843 65.881 -17.020 1.00 12.76 1 .  
.  
ATOM 5542 O O . TRP TRP TRP B B 300 300 . 28.778 64.769 -17.621 1.00 11.41 1 .  
.  
ATOM 5543 N N . ALA ALA ALA B B 301 301 . 29.464 66.941 -17.523 1.00 11.68 1 .  
.  
ATOM 5544 CA CA . ALA ALA ALA B B 301 301 . 30.147 66.846 -18.834 1.00 12.56 1 .  
.  
ATOM 5545 CB CB . ALA ALA ALA B B 301 301 . 30.771 68.241 -19.262 1.00 12.89 1 .  
.  
ATOM 5546 C C . ALA ALA ALA B B 301 301 . 31.209 65.774 -18.842 1.00 12.97 1 .  
.  
ATOM 5547 O O . ALA ALA ALA B B 301 301 . 31.354 65.015 -19.859 1.00 12.84 1 .  
.  
ATOM 5548 N N . ALA ALA ALA B B 302 302 . 31.983 65.684 -17.738 1.00 10.54 1 .  
.  
ATOM 5549 CA CA . ALA ALA ALA B B 302 302 . 33.051 64.686 -17.699 1.00 11.08 1 .  
.  
ATOM 5550 CB CB . ALA ALA ALA B B 302 302 . 34.002 64.930 -16.477 1.00 11.49 1 .  
.  
ATOM 5551 C C . ALA ALA ALA B B 302 302 . 32.503 63.256 -17.649 1.00 11.12 1 .  
.  
ATOM 5552 O O . ALA ALA ALA B B 302 302 . 33.041 62.363 -18.302 1.00 12.09 1 .  
.  
ATOM 5553 N N . TRP TRP TRP B B 303 303 . 31.460 63.044 -16.867 1.00 11.36 1 .  
.  
ATOM 5554 CA CA . TRP TRP TRP B B 303 303 . 30.805 61.740 -16.757 1.00 10.89 1 .  
.  
ATOM 5555 CB CB . TRP TRP TRP B B 303 303 . 29.572 61.815 -15.853 1.00 12.15 1 .  
.  
ATOM 5556 CG CG . TRP TRP TRP B B 303 303 . 29.943 61.822 -14.376 1.00 10.36 1 .  
.  
ATOM 5557 CD1 CD1 . TRP TRP TRP B B 303 303 . 30.163 62.948 -13.535 1.00 9.20 1 .  
.  
ATOM 5558 NE1 NE1 . TRP TRP TRP B B 303 303 . 30.408 62.515 -12.251 1.00 10.94 1 .  
.  
ATOM 5559 CE2 CE2 . TRP TRP TRP B B 303 303 . 30.198 61.153 -12.200 1.00 10.40 1 .  
.  
ATOM 5560 CD2 CD2 . TRP TRP TRP B B 303 303 . 29.983 60.681 -13.527 1.00 8.08 1 .  
.  
ATOM 5561 CE3 CE3 . TRP TRP TRP B B 303 303 . 29.709 59.308 -13.737 1.00 9.41 1 .  
.  
ATOM 5562 CZ3 CZ3 . TRP TRP TRP B B 303 303 . 29.721 58.415 -12.612 1.00 9.94 1 .  
.  
ATOM 5563 CH2 CH2 . TRP TRP TRP B B 303 303 . 29.994 58.916 -11.291 1.00 11.51 1 .  
.  
ATOM 5564 CZ2 CZ2 . TRP TRP TRP B B 303 303 . 30.259 60.290 -11.079 1.00 9.03 1 .  
.  
ATOM 5565 C C . TRP TRP TRP B B 303 303 . 30.313 61.276 -18.125 1.00 11.34 1 .  
.  
ATOM 5566 O O . TRP TRP TRP B B 303 303 . 30.652 60.171 -18.550 1.00 11.43 1 .  
.  
ATOM 5567 N N . SER SER SER B B 304 304 . 29.581 62.160 -18.841 1.00 10.29 1 .  
.  
ATOM 5568 CA CA . SER SER SER B B 304 304 . 28.977 61.725 -20.138 1.00 11.50 1 .  
.

ATOM 5569 CB CB . SER SER SER B B 304 304 . 28.013 62.839 -20.603 1.00 12.89 1 .  
.ATOM 5570 OG OG . SER SER SER B B 304 304 . 26.864 62.930 -19.705 1.00 14.55 1 .  
.ATOM 5571 C C . SER SER SER B B 304 304 . 30.093 61.483 -21.133 1.00 12.55 1 .  
.ATOM 5572 O O . SER SER SER B B 304 304 . 30.038 60.498 -21.925 1.00 11.84 1 .  
.ATOM 5573 N N . LYS LYS LYS B B 305 305 . 31.120 62.322 -21.146 1.00 11.97 1 .  
.ATOM 5574 CA CA . LYS LYS LYS B B 305 305 . 32.189 62.173 -22.162 1.00 14.07 1 .  
.ATOM 5575 CB CB . LYS LYS LYS B B 305 305 . 33.134 63.358 -22.121 1.00 15.21 1 .  
.ATOM 5576 CG CG . LYS LYS LYS B B 305 305 . 34.250 63.290 -23.259 1.00 19.04 1 .  
.ATOM 5577 CD CD . LYS LYS LYS B B 305 305 . 34.888 64.686 -23.454 1.00 27.88 1 .  
.ATOM 5578 CE CE . LYS LYS LYS B B 305 305 . 35.870 64.713 -24.639 1.00 34.53 1 .  
.ATOM 5579 NZ NZ . LYS LYS LYS B B 305 305 . 37.019 63.896 -24.217 1.00 42.79 1 .  
.ATOM 5580 C C . LYS LYS LYS B B 305 305 . 32.952 60.878 -21.890 1.00 13.61 1 .  
.ATOM 5581 O O . LYS LYS LYS B B 305 305 . 33.239 60.062 -22.802 1.00 14.20 1 .  
.ATOM 5582 N N . PHE PHE PHE B B 306 306 . 33.270 60.666 -20.624 1.00 10.87 1 .  
.ATOM 5583 CA CA . PHE PHE PHE B B 306 306 . 34.035 59.453 -20.285 1.00 11.74 1 .  
.ATOM 5584 CB CB . PHE PHE PHE B B 306 306 . 34.445 59.521 -18.800 1.00 13.40 1 .  
.ATOM 5585 CG CG . PHE PHE PHE B B 306 306 . 35.415 58.429 -18.400 1.00 12.11 1 .  
.ATOM 5586 CD1 CD1 . PHE PHE PHE B B 306 306 . 36.707 58.417 -18.905 1.00 15.91 1 .  
.ATOM 5587 CE1 CE1 . PHE PHE PHE B B 306 306 . 37.674 57.432 -18.519 1.00 13.69 1 .  
.ATOM 5588 CZ CZ . PHE PHE PHE B B 306 306 . 37.274 56.451 -17.661 1.00 14.25 1 .  
.ATOM 5589 CE2 CE2 . PHE PHE PHE B B 306 306 . 36.006 56.478 -17.144 1.00 14.85 1 .  
.ATOM 5590 CD2 CD2 . PHE PHE PHE B B 306 306 . 35.054 57.478 -17.489 1.00 12.54 1 .  
.ATOM 5591 C C . PHE PHE PHE B B 306 306 . 33.241 58.192 -20.583 1.00 12.52 1 .  
.ATOM 5592 O O . PHE PHE PHE B B 306 306 . 33.808 57.271 -21.193 1.00 12.87 1 .  
.ATOM 5593 N N . THR THR THR B B 307 307 . 31.948 58.158 -20.222 1.00 11.60 1 .  
.ATOM 5594 CA CA . THR THR THR B B 307 307 . 31.158 56.945 -20.344 1.00 13.23 1 .  
.ATOM 5595 CB CB . THR THR THR B B 307 307 . 29.786 57.187 -19.706 1.00 13.00 1 .  
.ATOM 5596 OG1 OG1 . THR THR THR B B 307 307 . 30.007 57.251 -18.290 1.00 12.38 1 .  
.ATOM 5597 CG2 CG2 . THR THR THR B B 307 307 . 28.795 56.093 -19.964 1.00 14.70 1 .  
.ATOM 5598 C C . THR THR THR B B 307 307 . 31.054 56.649 -21.850 1.00 12.66 1 .  
.

ATOM 5599 O O . THR THR THR B B 307 307 . 31.100 55.466 -22.251 1.00 12.68 1 .  
.  
ATOM 5600 N N . ALA ALA ALA B B 308 308 . 30.931 57.711 -22.664 1.00 13.07 1 .  
.  
ATOM 5601 CA CA . ALA ALA ALA B B 308 308 . 30.894 57.502 -24.133 1.00 14.55 1 .  
.  
ATOM 5602 CB CB . ALA ALA ALA B B 308 308 . 30.472 58.752 -24.843 1.00 14.97 1 .  
.  
ATOM 5603 C C . ALA ALA ALA B B 308 308 . 32.186 57.009 -24.759 1.00 13.79 1 .  
.  
ATOM 5604 O O . ALA ALA ALA B B 308 308 . 32.121 56.559 -25.938 1.00 17.48 1 .  
.  
ATOM 5605 N N . ASN ASN ASN B B 309 309 . 33.311 57.089 -24.063 1.00 12.53 1 .  
.  
ATOM 5606 CA CA . ASN ASN ASN B B 309 309 . 34.588 56.775 -24.637 1.00 13.72 1 .  
.  
ATOM 5607 CB CB . ASN ASN ASN B B 309 309 . 35.476 57.983 -24.404 1.00 16.86 1 .  
.  
ATOM 5608 CG CG . ASN ASN ASN B B 309 309 . 35.173 59.145 -25.368 1.00 24.70 1 .  
.  
ATOM 5609 OD1 OD1 . ASN ASN ASN B B 309 309 . 34.718 58.953 -26.488 1.00 32.88 1 .  
.  
ATOM 5610 ND2 ND2 . ASN ASN ASN B B 309 309 . 35.505 60.345 -24.942 1.00 32.53 1 .  
.  
ATOM 5611 C C . ASN ASN ASN B B 309 309 . 35.259 55.521 -24.044 1.00 13.06 1 .  
.  
ATOM 5612 O O . ASN ASN ASN B B 309 309 . 36.438 55.261 -24.317 1.00 16.04 1 .  
.  
ATOM 5613 N N . VAL VAL VAL B B 310 310 . 34.553 54.785 -23.186 1.00 12.29 1 .  
.  
ATOM 5614 CA CA . VAL VAL VAL B B 310 310 . 35.059 53.508 -22.613 1.00 12.86 1 .  
.  
ATOM 5615 CB CB . VAL VAL VAL B B 310 310 . 35.469 53.748 -21.106 1.00 13.80 1 .  
.  
ATOM 5616 CG1 CG1 . VAL VAL VAL B B 310 310 . 36.421 54.899 -21.017 1.00 17.43 1 .  
.  
ATOM 5617 CG2 CG2 . VAL VAL VAL B B 310 310 . 34.242 54.054 -20.258 1.00 13.10 1 .  
.  
ATOM 5618 C C . VAL VAL VAL B B 310 310 . 34.032 52.431 -22.653 1.00 11.70 1 .  
.  
ATOM 5619 O O . VAL VAL VAL B B 310 310 . 32.839 52.658 -22.913 1.00 12.18 1 .  
.  
ATOM 5620 N N . GLY GLY GLY B B 311 311 . 34.495 51.172 -22.413 1.00 12.79 1 .  
.  
ATOM 5621 CA CA . GLY GLY GLY B B 311 311 . 33.530 50.076 -22.351 1.00 11.16 1 .  
.  
ATOM 5622 C C . GLY GLY GLY B B 311 311 . 33.328 49.518 -20.957 1.00 12.74 1 .  
.  
ATOM 5623 O O . GLY GLY GLY B B 311 311 . 32.545 48.595 -20.751 1.00 13.03 1 .  
.  
ATOM 5624 N N . ILE ILE ILE B B 312 312 . 34.032 50.093 -20.005 1.00 11.30 1 .  
.  
ATOM 5625 CA CA . ILE ILE ILE B B 312 312 . 33.895 49.530 -18.629 1.00 10.60 1 .  
.  
ATOM 5626 CB CB . ILE ILE ILE B B 312 312 . 35.134 49.903 -17.738 1.00 8.62 1 .  
.  
ATOM 5627 CG1 CG1 . ILE ILE ILE B B 312 312 . 35.281 51.453 -17.697 1.00 11.15 1 .  
.  
ATOM 5628 CD CD . ILE ILE ILE B B 312 312 . 36.163 51.929 -16.461 1.00 15.41 1 .  
.

ATOM 5629 CG2 CG2 . ILE ILE ILE B B 312 312 . 36.452 49.372 -18.285 1.00 12.18 1 .  
.  
ATOM 5630 C C . ILE ILE ILE B B 312 312 . 32.619 49.998 -17.970 1.00 10.18 1 .  
.  
ATOM 5631 O O . ILE ILE ILE B B 312 312 . 31.945 50.939 -18.432 1.00 12.11 1 .  
.  
ATOM 5632 N N . GLN GLN GLN B B 313 313 . 32.326 49.359 -16.822 1.00 9.61 1 .  
.  
ATOM 5633 CA CA . GLN GLN GLN B B 313 313 . 31.224 49.816 -15.979 1.00 9.10 1 .  
.  
ATOM 5634 CB CB . GLN GLN GLN B B 313 313 . 30.942 48.728 -14.930 1.00 9.86 1 .  
.  
ATOM 5635 CG CG . GLN GLN GLN B B 313 313 . 29.898 49.225 -13.915 1.00 10.98 1 .  
.  
ATOM 5636 CD CD . GLN GLN GLN B B 313 313 . 29.331 48.093 -13.124 1.00 11.84 1 .  
.  
ATOM 5637 OE1 OE1 . GLN GLN GLN B B 313 313 . 28.312 47.476 -13.517 1.00 15.11 1 .  
.  
ATOM 5638 NE2 NE2 . GLN GLN GLN B B 313 313 . 30.012 47.775 -12.023 1.00 12.39 1 .  
.  
ATOM 5639 C C . GLN GLN GLN B B 313 313 . 31.629 51.149 -15.285 1.00 8.62 1 .  
.  
ATOM 5640 O O . GLN GLN GLN B B 313 313 . 32.737 51.275 -14.799 1.00 10.31 1 .  
.  
ATOM 5641 N N . ILE ILE ILE B B 314 314 . 30.674 52.106 -15.305 1.00 8.90 1 .  
.  
ATOM 5642 CA CA . ILE ILE ILE B B 314 314 . 30.893 53.439 -14.718 1.00 9.23 1 .  
.  
ATOM 5643 CB CB . ILE ILE ILE B B 314 314 . 30.800 54.540 -15.798 1.00 9.77 1 .  
.  
ATOM 5644 CG1 CG1 . ILE ILE ILE B B 314 314 . 31.942 54.379 -16.807 1.00 10.43 1 .  
.  
ATOM 5645 CD CD . ILE ILE ILE B B 314 314 . 33.342 54.435 -16.259 1.00 13.47 1 .  
.  
ATOM 5646 CG2 CG2 . ILE ILE ILE B B 314 314 . 30.805 55.976 -15.128 1.00 12.94 1 .  
.  
ATOM 5647 C C . ILE ILE ILE B B 314 314 . 29.767 53.639 -13.748 1.00 9.56 1 .  
.  
ATOM 5648 O O . ILE ILE ILE B B 314 314 . 28.572 53.670 -14.133 1.00 8.86 1 .  
.  
ATOM 5649 N N . VAL VAL VAL B B 315 315 . 30.152 53.743 -12.445 1.00 9.90 1 .  
.  
ATOM 5650 CA CA . VAL VAL VAL B B 315 315 . 29.136 53.675 -11.382 1.00 9.65 1 .  
.  
ATOM 5651 CB CB . VAL VAL VAL B B 315 315 . 29.621 52.705 -10.239 1.00 9.59 1 .  
.  
ATOM 5652 CG1 CG1 . VAL VAL VAL B B 315 315 . 28.474 52.532 -9.220 1.00 10.69 1 .  
.  
ATOM 5653 CG2 CG2 . VAL VAL VAL B B 315 315 . 30.032 51.335 -10.874 1.00 10.46 1 .  
.  
ATOM 5654 C C . VAL VAL VAL B B 315 315 . 28.841 55.024 -10.774 1.00 8.62 1 .  
.  
ATOM 5655 O O . VAL VAL VAL B B 315 315 . 29.780 55.672 -10.298 1.00 10.08 1 .  
.  
ATOM 5656 N N . GLY GLY GLY B B 316 316 . 27.557 55.427 -10.752 1.00 9.60 1 .  
.  
ATOM 5657 CA CA . GLY GLY GLY B B 316 316 . 27.130 56.636 -10.044 1.00 10.12 1 .  
.  
ATOM 5658 C C . GLY GLY GLY B B 316 316 . 26.938 56.288 -8.554 1.00 10.65 1 .  
.  
.

ATOM 5659 O O . GLY GLY GLY B B 316 316 . 26.204 55.368 -8.237 1.00 12.11 1 .  
.  
ATOM 5660 N N . ASP ASP ASP B B 317 317 . 27.545 57.104 -7.674 1.00 10.58 1 .  
.  
ATOM 5661 CA CA . ASP ASP ASP B B 317 317 . 27.293 56.926 -6.225 1.00 11.41 1 .  
.  
ATOM 5662 CB CB . ASP ASP ASP B B 317 317 . 28.574 56.433 -5.576 1.00 12.83 1 .  
.  
ATOM 5663 CG CG . ASP ASP ASP B B 317 317 . 28.467 56.411 -4.049 1.00 9.21 1 .  
.  
ATOM 5664 OD1 OD1 . ASP ASP ASP B B 317 317 . 27.313 56.518 -3.604 1.00 13.45 1 .  
.  
ATOM 5665 OD2 OD2 . ASP ASP ASP B B 317 317 . 29.545 56.374 -3.408 1.00 10.85 1 .  
.  
ATOM 5666 C C . ASP ASP ASP B B 317 317 . 26.886 58.325 -5.771 1.00 11.18 1 .  
.  
ATOM 5667 O O . ASP ASP ASP B B 317 317 . 25.708 58.559 -5.663 1.00 12.34 1 .  
.  
ATOM 5668 N N . ASP ASP ASP B B 318 318 . 27.848 59.216 -5.535 1.00 12.72 1 .  
.  
ATOM 5669 CA CA . ASP ASP ASP B B 318 318 . 27.511 60.626 -5.141 1.00 12.79 1 .  
.  
ATOM 5670 CB CB . ASP ASP ASP B B 318 318 . 28.762 61.366 -4.682 1.00 11.91 1 .  
.  
ATOM 5671 CG CG . ASP ASP ASP B B 318 318 . 29.284 60.797 -3.308 1.00 11.69 1 .  
.  
ATOM 5672 OD1 OD1 . ASP ASP ASP B B 318 318 . 28.459 60.139 -2.599 1.00 15.47 1 .  
.  
ATOM 5673 OD2 OD2 . ASP ASP ASP B B 318 318 . 30.478 60.955 -3.063 1.00 17.50 1 .  
.  
ATOM 5674 C C . ASP ASP ASP B B 318 318 . 26.856 61.390 -6.328 1.00 12.45 1 .  
.  
ATOM 5675 O O . ASP ASP ASP B B 318 318 . 26.037 62.235 -6.137 1.00 12.54 1 .  
.  
ATOM 5676 N N . LEU LEU LEU B B 319 319 . 27.081 60.892 -7.561 1.00 11.70 1 .  
.  
ATOM 5677 CA CA . LEU LEU LEU B B 319 319 . 26.365 61.529 -8.703 1.00 10.52 1 .  
.  
ATOM 5678 CB CB . LEU LEU LEU B B 319 319 . 26.819 60.792 -9.991 1.00 11.48 1 .  
.  
ATOM 5679 CG CG . LEU LEU LEU B B 319 319 . 26.100 61.337 -11.254 1.00 11.22 1 .  
.  
ATOM 5680 CD1 CD1 . LEU LEU LEU B B 319 319 . 26.617 62.732 -11.635 1.00 11.69 1 .  
.  
ATOM 5681 CD2 CD2 . LEU LEU LEU B B 319 319 . 26.365 60.355 -12.458 1.00 13.69 1 .  
.  
ATOM 5682 C C . LEU LEU LEU B B 319 319 . 24.834 61.298 -8.562 1.00 11.64 1 .  
.  
ATOM 5683 O O . LEU LEU LEU B B 319 319 . 24.011 62.216 -8.812 1.00 13.14 1 .  
.  
ATOM 5684 N N . THR THR THR B B 320 320 . 24.416 60.074 -8.217 1.00 11.74 1 .  
.  
ATOM 5685 CA CA . THR THR THR B B 320 320 . 23.017 59.672 -8.347 1.00 11.54 1 .  
.  
ATOM 5686 CB CB . THR THR THR B B 320 320 . 22.939 58.241 -9.004 1.00 12.38 1 .  
.  
ATOM 5687 OG1 OG1 . THR THR THR B B 320 320 . 24.034 57.477 -8.508 1.00 12.82 1 .  
.  
ATOM 5688 CG2 CG2 . THR THR THR B B 320 320 . 23.210 58.423 -10.515 1.00 13.19 1 .  
.



ATOM 5719 O O . PRO PRO PRO B B 324 324 . 15.450 59.946 -10.983 1.00 18.99 1 .  
.  
ATOM 5720 N N . LYS LYS LYS B B 325 325 . 15.203 61.144 -9.082 1.00 19.93 1 .  
.  
ATOM 5721 CA CA . LYS LYS LYS B B 325 325 . 15.333 62.438 -9.815 1.00 19.10 1 .  
.  
ATOM 5722 CB CB . LYS LYS LYS B B 325 325 . 14.961 63.606 -8.894 1.00 21.28 1 .  
.  
ATOM 5723 CG CG . LYS LYS LYS B B 325 325 . 13.455 63.611 -8.622 1.00 24.79 1 .  
.  
ATOM 5724 C C . LYS LYS LYS B B 325 325 . 16.728 62.651 -10.497 1.00 18.44 1 .  
.  
ATOM 5725 O O . LYS LYS LYS B B 325 325 . 16.893 63.081 -11.694 1.00 18.81 1 .  
.  
ATOM 5726 N N . ARG ARG ARG B B 326 326 . 17.757 62.294 -9.752 1.00 17.23 1 .  
.  
ATOM 5727 CA CA . ARG ARG ARG B B 326 326 . 19.125 62.391 -10.266 1.00 14.58 1 .  
.  
ATOM 5728 CB CB . ARG ARG ARG B B 326 326 . 20.184 62.290 -9.160 1.00 15.57 1 .  
.  
ATOM 5729 CG CG . ARG ARG ARG B B 326 326 . 19.964 63.266 -7.957 1.00 21.84 1 .  
.  
ATOM 5730 CD CD . ARG ARG ARG B B 326 326 . 20.782 64.482 -7.969 1.00 24.29 1 .  
.  
ATOM 5731 NE NE . ARG ARG ARG B B 326 326 . 22.202 64.277 -8.262 1.00 19.46 1 .  
.  
ATOM 5732 CZ CZ . ARG ARG ARG B B 326 326 . 22.930 65.274 -8.781 1.00 17.98 1 .  
.  
ATOM 5733 NH1 NH1 . ARG ARG ARG B B 326 326 . 24.197 65.081 -9.082 1.00 13.89 1 .  
.  
ATOM 5734 NH2 NH2 . ARG ARG ARG B B 326 326 . 22.328 66.497 -8.981 1.00 19.59 1 .  
.  
ATOM 5735 C C . ARG ARG ARG B B 326 326 . 19.354 61.270 -11.256 1.00 13.04 1 .  
.  
ATOM 5736 O O . ARG ARG ARG B B 326 326 . 20.047 61.487 -12.242 1.00 13.58 1 .  
.  
ATOM 5737 N N . ILE ILE ILE B B 327 327 . 18.803 60.066 -11.008 1.00 14.16 1 .  
.  
ATOM 5738 CA CA . ILE ILE ILE B B 327 327 . 19.027 58.945 -11.870 1.00 12.64 1 .  
.  
ATOM 5739 CB CB . ILE ILE ILE B B 327 327 . 18.426 57.650 -11.295 1.00 13.30 1 .  
.  
ATOM 5740 CG1 CG1 . ILE ILE ILE B B 327 327 . 19.248 57.220 -10.058 1.00 14.42 1 .  
.  
ATOM 5741 CD CD . ILE ILE ILE B B 327 327 . 18.420 56.191 -9.123 1.00 14.09 1 .  
.  
ATOM 5742 CG2 CG2 . ILE ILE ILE B B 327 327 . 18.350 56.552 -12.373 1.00 14.31 1 .  
.  
ATOM 5743 C C . ILE ILE ILE B B 327 327 . 18.365 59.301 -13.243 1.00 14.33 1 .  
.  
ATOM 5744 O O . ILE ILE ILE B B 327 327 . 18.982 59.040 -14.297 1.00 13.77 1 .  
.  
ATOM 5745 N N . GLU GLU GLU B B 328 328 . 17.161 59.901 -13.226 1.00 15.01 1 .  
.  
ATOM 5746 CA CA . GLU GLU GLU B B 328 328 . 16.532 60.340 -14.529 1.00 17.47 1 .  
.  
ATOM 5747 CB CB . GLU GLU GLU B B 328 328 . 15.185 61.054 -14.294 1.00 20.37 1 .  
.  
ATOM 5748 CG CG . GLU GLU GLU B B 328 328 . 14.099 60.039 -13.969 1.00 28.78 1 .  
.

ATOM 5749 CD CD . GLU GLU GLU B B 328 328 . 13.394 59.286 -15.197 1.00 41.03 1 .  
.ATOM 5750 OE1 OE1 . GLU GLU GLU B B 328 328 . 14.023 58.901 -16.262 1.00 41.95 1 .  
.ATOM 5751 OE2 OE2 . GLU GLU GLU B B 328 328 . 12.154 59.035 -15.033 1.00 47.47 1 .  
.ATOM 5752 C C . GLU GLU GLU B B 328 328 . 17.465 61.236 -15.350 1.00 16.93 1 .  
.ATOM 5753 O O . GLU GLU GLU B B 328 328 . 17.581 61.033 -16.557 1.00 18.50 1 .  
.ATOM 5754 N N . ARG ARG ARG B B 329 329 . 18.104 62.216 -14.720 1.00 15.70 1 .  
.ATOM 5755 CA CA . ARG ARG ARG B B 329 329 . 19.069 63.053 -15.391 1.00 14.19 1 .  
.ATOM 5756 CB CB . ARG ARG ARG B B 329 329 . 19.534 64.157 -14.484 1.00 15.17 1 .  
.ATOM 5757 CG CG . ARG ARG ARG B B 329 329 . 20.578 65.138 -15.173 1.00 14.74 1 .  
.ATOM 5758 CD CD . ARG ARG ARG B B 329 329 . 20.724 66.434 -14.377 1.00 17.00 1 .  
.ATOM 5759 NE NE . ARG ARG ARG B B 329 329 . 21.701 67.333 -15.026 1.00 18.55 1 .  
.ATOM 5760 CZ CZ . ARG ARG ARG B B 329 329 . 22.185 68.456 -14.452 1.00 19.56 1 .  
.ATOM 5761 NH1 NH1 . ARG ARG ARG B B 329 329 . 21.803 68.808 -13.197 1.00 19.45 1 .  
.ATOM 5762 NH2 NH2 . ARG ARG ARG B B 329 329 . 23.079 69.199 -15.104 1.00 19.92 1 .  
.ATOM 5763 C C . ARG ARG ARG B B 329 329 . 20.232 62.251 -15.965 1.00 14.95 1 .  
.ATOM 5764 O O . ARG ARG ARG B B 329 329 . 20.705 62.527 -17.118 1.00 15.31 1 .  
.ATOM 5765 N N . ALA ALA ALA B B 330 330 . 20.809 61.340 -15.127 1.00 13.40 1 .  
.ATOM 5766 CA CA . ALA ALA ALA B B 330 330 . 21.962 60.593 -15.526 1.00 12.29 1 .  
.ATOM 5767 CB CB . ALA ALA ALA B B 330 330 . 22.545 59.830 -14.274 1.00 12.73 1 .  
.ATOM 5768 C C . ALA ALA ALA B B 330 330 . 21.596 59.671 -16.675 1.00 13.10 1 .  
.ATOM 5769 O O . ALA ALA ALA B B 330 330 . 22.401 59.445 -17.546 1.00 14.51 1 .  
.ATOM 5770 N N . VAL VAL VAL B B 331 331 . 20.358 59.184 -16.711 1.00 13.36 1 .  
.ATOM 5771 CA CA . VAL VAL VAL B B 331 331 . 19.953 58.304 -17.828 1.00 15.38 1 .  
.ATOM 5772 CB CB . VAL VAL VAL B B 331 331 . 18.540 57.644 -17.580 1.00 15.66 1 .  
.ATOM 5773 CG1 CG1 . VAL VAL VAL B B 331 331 . 17.983 57.074 -18.907 1.00 16.44 1 .  
.ATOM 5774 CG2 CG2 . VAL VAL VAL B B 331 331 . 18.620 56.495 -16.492 1.00 15.79 1 .  
.ATOM 5775 C C . VAL VAL VAL B B 331 331 . 19.890 59.139 -19.082 1.00 16.17 1 .  
.ATOM 5776 O O . VAL VAL VAL B B 331 331 . 20.431 58.732 -20.137 1.00 17.75 1 .  
.ATOM 5777 N N . GLU GLU GLU B B 332 332 . 19.186 60.280 -19.010 1.00 17.15 1 .  
.ATOM 5778 CA CA . GLU GLU GLU B B 332 332 . 19.028 61.209 -20.166 1.00 18.92 1 .  
.



ATOM 5779 CB CB . GLU GLU GLU B B 332 332 . 18.126 62.408 -19.794 1.00 18.69 1 .  
.ATOM 5780 CG CG . GLU GLU GLU B B 332 332 . 17.842 63.410 -20.999 1.00 26.37 1 .  
.ATOM 5781 C C . GLU GLU GLU B B 332 332 . 20.378 61.692 -20.729 1.00 16.21 1 .  
.ATOM 5782 O O . GLU GLU GLU B B 332 332 . 20.593 61.722 -21.977 1.00 19.73 1 .  
.ATOM 5783 N N . GLU GLU GLU B B 333 333 . 21.339 61.997 -19.855 1.00 15.38 1 .  
.ATOM 5784 CA CA . GLU GLU GLU B B 333 333 . 22.666 62.469 -20.286 1.00 13.93 1 .  
.ATOM 5785 CB CB . GLU GLU GLU B B 333 333 . 23.210 63.488 -19.269 1.00 14.57 1 .  
.ATOM 5786 CG CG . GLU GLU GLU B B 333 333 . 22.142 64.656 -19.085 1.00 17.58 1 .  
.ATOM 5787 CD CD . GLU GLU GLU B B 333 333 . 22.731 65.910 -18.383 1.00 19.56 1 .  
.ATOM 5788 OE1 OE1 . GLU GLU GLU B B 333 333 . 21.894 66.690 -17.855 1.00 19.86 1 .  
.ATOM 5789 OE2 OE2 . GLU GLU GLU B B 333 333 . 23.995 66.111 -18.369 1.00 20.14 1 .  
.ATOM 5790 C C . GLU GLU GLU B B 333 333 . 23.660 61.361 -20.538 1.00 12.66 1 .  
.ATOM 5791 O O . GLU GLU GLU B B 333 333 . 24.785 61.610 -20.915 1.00 14.66 1 .  
.ATOM 5792 N N . LYS LYS LYS B B 334 334 . 23.237 60.112 -20.289 1.00 13.24 1 .  
.ATOM 5793 CA CA . LYS LYS LYS B B 334 334 . 24.178 58.985 -20.442 1.00 13.81 1 .  
.ATOM 5794 CB CB . LYS LYS LYS B B 334 334 . 24.515 58.606 -21.890 1.00 14.36 1 .  
.ATOM 5795 CG CG . LYS LYS LYS B B 334 334 . 23.285 58.228 -22.705 1.00 17.89 1 .  
.ATOM 5796 CD CD . LYS LYS LYS B B 334 334 . 23.718 57.681 -24.145 1.00 22.61 1 .  
.ATOM 5797 CE CE . LYS LYS LYS B B 334 334 . 22.634 57.908 -25.187 1.00 36.51 1 .  
.ATOM 5798 NZ NZ . LYS LYS LYS B B 334 334 . 21.448 57.048 -24.902 1.00 39.86 1 .  
.ATOM 5799 C C . LYS LYS LYS B B 334 334 . 25.438 59.179 -19.632 1.00 11.74 1 .  
.ATOM 5800 O O . LYS LYS LYS B B 334 334 . 26.552 58.970 -20.080 1.00 12.42 1 .  
.ATOM 5801 N N . ALA ALA ALA B B 335 335 . 25.219 59.636 -18.403 1.00 11.07 1 .  
.ATOM 5802 CA CA . ALA ALA ALA B B 335 335 . 26.354 60.006 -17.532 1.00 11.40 1 .  
.ATOM 5803 CB CB . ALA ALA ALA B B 335 335 . 25.816 60.845 -16.359 1.00 13.73 1 .  
.ATOM 5804 C C . ALA ALA ALA B B 335 335 . 27.094 58.796 -16.998 1.00 11.12 1 .  
.ATOM 5805 O O . ALA ALA ALA B B 335 335 . 28.289 58.881 -16.691 1.00 11.58 1 .  
.ATOM 5806 N N . CYS CYS CYS B B 336 336 . 26.394 57.694 -16.838 1.00 12.08 1 .  
.ATOM 5807 CA CA . CYS CYS CYS B B 336 336 . 27.029 56.487 -16.260 1.00 11.58 1 .  
.ATOM 5808 CB CB . CYS CYS CYS B B 336 336 . 27.122 56.558 -14.696 1.00 11.68 1 .  
.

ATOM 5809 SG SG . CYS CYS CYS B B 336 336 . 25.490 56.830 -13.880 1.00 14.48 1 .  
.ATOM 5810 C C . CYS CYS CYS B B 336 336 . 26.198 55.297 -16.719 1.00 12.70 1 .  
.ATOM 5811 O O . CYS CYS CYS B B 336 336 . 25.216 55.475 -17.441 1.00 15.13 1 .  
.ATOM 5812 N N . ASN ASN ASN B B 337 337 . 26.564 54.088 -16.299 1.00 11.18 1 .  
.ATOM 5813 CA CA . ASN ASN ASN B B 337 337 . 25.797 52.921 -16.722 1.00 11.95 1 .  
.ATOM 5814 CB CB . ASN ASN ASN B B 337 337 . 26.491 52.261 -17.953 1.00 11.01 1 .  
.ATOM 5815 CG CG . ASN ASN ASN B B 337 337 . 27.917 51.903 -17.702 1.00 12.95 1 .  
.ATOM 5816 OD1 OD1 . ASN ASN ASN B B 337 337 . 28.791 51.962 -18.626 1.00 16.52 1 .  
.ATOM 5817 ND2 ND2 . ASN ASN ASN B B 337 337 . 28.192 51.491 -16.494 1.00 8.10 1 .  
.ATOM 5818 C C . ASN ASN ASN B B 337 337 . 25.537 51.942 -15.580 1.00 10.61 1 .  
.ATOM 5819 O O . ASN ASN ASN B B 337 337 . 25.143 50.766 -15.834 1.00 10.72 1 .  
.ATOM 5820 N N . CYS CYS CYS B B 338 338 . 25.832 52.363 -14.339 1.00 10.47 1 .  
.ATOM 5821 CA CA . CYS CYS CYS B B 338 338 . 25.505 51.478 -13.213 1.00 10.87 1 .  
.ATOM 5822 CB CB . CYS CYS CYS B B 338 338 . 26.770 50.661 -12.905 1.00 10.41 1 .  
.ATOM 5823 SG SG . CYS CYS CYS B B 338 338 . 26.508 49.469 -11.529 1.00 15.16 1 .  
.ATOM 5824 C C . CYS CYS CYS B B 338 338 . 25.155 52.401 -12.053 1.00 11.33 1 .  
.ATOM 5825 O O . CYS CYS CYS B B 338 338 . 25.812 53.440 -11.911 1.00 10.92 1 .  
.ATOM 5826 N N . LEU LEU LEU B B 339 339 . 24.183 51.980 -11.256 1.00 9.90 1 .  
.ATOM 5827 CA CA . LEU LEU LEU B B 339 339 . 23.807 52.731 -10.038 1.00 10.74 1 .  
.ATOM 5828 CB CB . LEU LEU LEU B B 339 339 . 22.291 52.675 -9.909 1.00 10.46 1 .  
.ATOM 5829 CG CG . LEU LEU LEU B B 339 339 . 21.728 53.195 -8.588 1.00 10.04 1 .  
.ATOM 5830 CD1 CD1 . LEU LEU LEU B B 339 339 . 21.939 54.743 -8.502 1.00 11.55 1 .  
.ATOM 5831 CD2 CD2 . LEU LEU LEU B B 339 339 . 20.203 52.907 -8.626 1.00 14.70 1 .  
.ATOM 5832 C C . LEU LEU LEU B B 339 339 . 24.389 52.040 -8.795 1.00 10.58 1 .  
.ATOM 5833 O O . LEU LEU LEU B B 339 339 . 24.147 50.844 -8.636 1.00 13.05 1 .  
.ATOM 5834 N N . LEU LEU LEU B B 340 340 . 25.016 52.805 -7.899 1.00 9.29 1 .  
.ATOM 5835 CA CA . LEU LEU LEU B B 340 340 . 25.375 52.225 -6.594 1.00 9.53 1 .  
.ATOM 5836 CB CB . LEU LEU LEU B B 340 340 . 26.560 52.952 -5.990 1.00 11.23 1 .  
.ATOM 5837 CG CG . LEU LEU LEU B B 340 340 . 27.136 52.214 -4.802 1.00 9.11 1 .  
.ATOM 5838 CD1 CD1 . LEU LEU LEU B B 340 340 . 28.077 51.095 -5.346 1.00 11.41 1 .  
.







ATOM 5929 N N . ILE ILE ILE B B 353 353 . 14.056 50.667 -3.851 1.00 14.33 1 .  
.ATOM 5930 CA CA . ILE ILE ILE B B 353 353 . 13.567 49.668 -4.870 1.00 13.39 1 .  
.ATOM 5931 CB CB . ILE ILE ILE B B 353 353 . 12.391 48.795 -4.328 1.00 14.12 1 .  
.ATOM 5932 CG1 CG1 . ILE ILE ILE B B 353 353 . 12.982 47.923 -3.200 1.00 15.52 1 .  
.ATOM 5933 CD CD . ILE ILE ILE B B 353 353 . 11.948 46.935 -2.578 1.00 18.08 1 .  
.ATOM 5934 CG2 CG2 . ILE ILE ILE B B 353 353 . 11.746 47.936 -5.419 1.00 15.08 1 .  
.ATOM 5935 C C . ILE ILE ILE B B 353 353 . 13.183 50.429 -6.126 1.00 11.96 1 .  
.ATOM 5936 O O . ILE ILE ILE B B 353 353 . 13.559 49.981 -7.244 1.00 13.49 1 .  
.ATOM 5937 N N . GLN GLN GLN B B 354 354 . 12.498 51.589 -5.987 1.00 13.33 1 .  
.ATOM 5938 CA CA . GLN GLN GLN B B 354 354 . 12.112 52.364 -7.207 1.00 15.01 1 .  
.ATOM 5939 CB CB . GLN GLN GLN B B 354 354 . 11.311 53.586 -6.835 1.00 15.54 1 .  
.ATOM 5940 CG CG . GLN GLN GLN B B 354 354 . 9.996 53.137 -6.302 1.00 24.45 1 .  
.ATOM 5941 CD CD . GLN GLN GLN B B 354 354 . 9.163 54.310 -5.744 1.00 30.69 1 .  
.ATOM 5942 OE1 OE1 . GLN GLN GLN B B 354 354 . 9.701 55.370 -5.285 1.00 33.88 1 .  
.ATOM 5943 NE2 NE2 . GLN GLN GLN B B 354 354 . 7.830 54.134 -5.798 1.00 35.61 1 .  
.ATOM 5944 C C . GLN GLN GLN B B 354 354 . 13.375 52.838 -7.960 1.00 15.32 1 .  
.ATOM 5945 O O . GLN GLN GLN B B 354 354 . 13.394 52.787 -9.212 1.00 15.67 1 .  
.ATOM 5946 N N . ALA ALA ALA B B 355 355 . 14.407 53.298 -7.227 1.00 14.71 1 .  
.ATOM 5947 CA CA . ALA ALA ALA B B 355 355 . 15.665 53.710 -7.820 1.00 13.74 1 .  
.ATOM 5948 CB CB . ALA ALA ALA B B 355 355 . 16.650 54.251 -6.725 1.00 13.41 1 .  
.ATOM 5949 C C . ALA ALA ALA B B 355 355 . 16.316 52.532 -8.603 1.00 14.29 1 .  
.ATOM 5950 O O . ALA ALA ALA B B 355 355 . 16.804 52.705 -9.756 1.00 13.20 1 .  
.ATOM 5951 N N . CYS CYS CYS B B 356 356 . 16.358 51.323 -8.019 1.00 13.33 1 .  
.ATOM 5952 CA CA . CYS CYS CYS B B 356 356 . 16.967 50.158 -8.664 1.00 14.15 1 .  
.ATOM 5953 CB CB . CYS CYS CYS B B 356 356 . 16.789 48.973 -7.691 1.00 15.07 1 .  
.ATOM 5954 SG SG . CYS CYS CYS B B 356 356 . 17.578 47.461 -8.363 1.00 16.29 1 .  
.ATOM 5955 C C . CYS CYS CYS B B 356 356 . 16.182 49.841 -9.948 1.00 14.08 1 .  
.ATOM 5956 O O . CYS CYS CYS B B 356 356 . 16.803 49.633 -11.044 1.00 16.84 1 .  
.ATOM 5957 N N . LYS LYS LYS B B 357 357 . 14.858 49.831 -9.822 1.00 14.55 1 .  
.ATOM 5958 CA CA . LYS LYS LYS B B 357 357 . 14.016 49.464 -11.007 1.00 16.86 1 .  
.

ATOM 5959 CB CB . LYS LYS LYS B B 357 357 . 12.580 49.255 -10.657 1.00 17.75 1 .  
.  
ATOM 5960 CG CG . LYS LYS LYS B B 357 357 . 12.313 48.065 -9.721 1.00 19.48 1 .  
.  
ATOM 5961 CD CD . LYS LYS LYS B B 357 357 . 10.826 47.982 -9.210 1.00 26.83 1 .  
.  
ATOM 5962 CE CE . LYS LYS LYS B B 357 357 . 10.336 49.265 -8.341 1.00 35.19 1 .  
.  
ATOM 5963 NZ NZ . LYS LYS LYS B B 357 357 . 8.974 49.529 -7.526 1.00 40.07 1 .  
.  
ATOM 5964 C C . LYS LYS LYS B B 357 357 . 14.185 50.487 -12.096 1.00 17.01 1 .  
.  
ATOM 5965 O O . LYS LYS LYS B B 357 357 . 14.230 50.120 -13.280 1.00 17.89 1 .  
.  
ATOM 5966 N N . LEU LEU LEU B B 358 358 . 14.312 51.761 -11.736 1.00 14.48 1 .  
.  
ATOM 5967 CA CA . LEU LEU LEU B B 358 358 . 14.537 52.792 -12.773 1.00 15.86 1 .  
.  
ATOM 5968 CB CB . LEU LEU LEU B B 358 358 . 14.430 54.175 -12.134 1.00 16.50 1 .  
.  
ATOM 5969 CG CG . LEU LEU LEU B B 358 358 . 14.716 55.358 -13.033 1.00 18.69 1 .  
.  
ATOM 5970 CD1 CD1 . LEU LEU LEU B B 358 358 . 13.593 55.336 -14.115 1.00 20.91 1 .  
.  
ATOM 5971 CD2 CD2 . LEU LEU LEU B B 358 358 . 14.770 56.627 -12.197 1.00 17.76 1 .  
.  
ATOM 5972 C C . LEU LEU LEU B B 358 358 . 15.848 52.606 -13.527 1.00 14.91 1 .  
.  
ATOM 5973 O O . LEU LEU LEU B B 358 358 . 15.901 52.690 -14.786 1.00 15.30 1 .  
.  
ATOM 5974 N N . ALA ALA ALA B B 359 359 . 16.918 52.265 -12.790 1.00 14.22 1 .  
.  
ATOM 5975 CA CA . ALA ALA ALA B B 359 359 . 18.213 51.986 -13.413 1.00 13.99 1 .  
.  
ATOM 5976 CB CB . ALA ALA ALA B B 359 359 . 19.234 51.733 -12.324 1.00 15.00 1 .  
.  
ATOM 5977 C C . ALA ALA ALA B B 359 359 . 18.063 50.746 -14.306 1.00 15.60 1 .  
.  
ATOM 5978 O O . ALA ALA ALA B B 359 359 . 18.492 50.771 -15.472 1.00 14.50 1 .  
.  
ATOM 5979 N N . GLN GLN GLN B B 360 360 . 17.497 49.653 -13.777 1.00 16.32 1 .  
.  
ATOM 5980 CA CA . GLN GLN GLN B B 360 360 . 17.506 48.375 -14.534 1.00 15.62 1 .  
.  
ATOM 5981 CB CB . GLN GLN GLN B B 360 360 . 16.912 47.246 -13.663 1.00 16.31 1 .  
.  
ATOM 5982 CG CG . GLN GLN GLN B B 360 360 . 17.958 46.863 -12.577 1.00 17.58 1 .  
.  
ATOM 5983 CD CD . GLN GLN GLN B B 360 360 . 17.436 45.844 -11.545 1.00 18.24 1 .  
.  
ATOM 5984 OE1 OE1 . GLN GLN GLN B B 360 360 . 18.239 45.009 -10.949 1.00 24.34 1 .  
.  
ATOM 5985 NE2 NE2 . GLN GLN GLN B B 360 360 . 16.161 45.904 -11.294 1.00 17.75 1 .  
.  
ATOM 5986 C C . GLN GLN GLN B B 360 360 . 16.634 48.544 -15.793 1.00 16.93 1 .  
.  
ATOM 5987 O O . GLN GLN GLN B B 360 360 . 17.009 48.034 -16.889 1.00 17.75 1 .  
.  
ATOM 5988 N N . GLU GLU GLU B B 361 361 . 15.479 49.226 -15.640 1.00 16.10 1 .  
.  
.

ATOM 5989 CA CA . GLU GLU GLU B B 361 361 . 14.616 49.549 -16.838 1.00 18.44 1 .  
.  
ATOM 5990 CB CB . GLU GLU GLU B B 361 361 . 13.333 50.284 -16.475 1.00 19.67 1 .  
.  
ATOM 5991 CG CG . GLU GLU GLU B B 361 361 . 12.462 49.325 -15.681 1.00 27.48 1 .  
.  
ATOM 5992 CD CD . GLU GLU GLU B B 361 361 . 11.254 50.037 -15.051 1.00 39.54 1 .  
.  
ATOM 5993 OE1 OE1 . GLU GLU GLU B B 361 361 . 11.059 51.281 -15.311 1.00 42.39 1 .  
.  
ATOM 5994 OE2 OE2 . GLU GLU GLU B B 361 361 . 10.518 49.317 -14.298 1.00 46.50 1 .  
.  
ATOM 5995 C C . GLU GLU GLU B B 361 361 . 15.301 50.312 -17.936 1.00 17.07 1 .  
.  
ATOM 5996 O O . GLU GLU GLU B B 361 361 . 14.893 50.151 -19.092 1.00 18.55 1 .  
.  
ATOM 5997 N N . ASN ASN ASN B B 362 362 . 16.360 51.037 -17.622 1.00 15.67 1 .  
.  
ATOM 5998 CA CA . ASN ASN ASN B B 362 362 . 17.082 51.845 -18.583 1.00 16.46 1 .  
.  
ATOM 5999 CB CB . ASN ASN ASN B B 362 362 . 17.271 53.250 -18.019 1.00 17.62 1 .  
.  
ATOM 6000 CG CG . ASN ASN ASN B B 362 362 . 16.018 54.046 -18.149 1.00 17.33 1 .  
.  
ATOM 6001 OD1 OD1 . ASN ASN ASN B B 362 362 . 15.658 54.455 -19.286 1.00 22.19 1 .  
.  
ATOM 6002 ND2 ND2 . ASN ASN ASN B B 362 362 . 15.294 54.258 -17.044 1.00 20.06 1 .  
.  
ATOM 6003 C C . ASN ASN ASN B B 362 362 . 18.393 51.175 -18.962 1.00 16.88 1 .  
.  
ATOM 6004 O O . ASN ASN ASN B B 362 362 . 19.295 51.801 -19.521 1.00 19.48 1 .  
.  
ATOM 6005 N N . GLY GLY GLY B B 363 363 . 18.529 49.898 -18.662 1.00 16.74 1 .  
.  
ATOM 6006 CA CA . GLY GLY GLY B B 363 363 . 19.701 49.205 -19.122 1.00 16.33 1 .  
.  
ATOM 6007 C C . GLY GLY GLY B B 363 363 . 20.960 49.329 -18.293 1.00 16.04 1 .  
.  
ATOM 6008 O O . GLY GLY GLY B B 363 363 . 22.037 48.910 -18.709 1.00 18.13 1 .  
.  
ATOM 6009 N N . TRP TRP TRP B B 364 364 . 20.823 49.880 -17.089 1.00 13.30 1 .  
.  
ATOM 6010 CA CA . TRP TRP TRP B B 364 364 . 22.029 50.000 -16.223 1.00 12.13 1 .  
.  
ATOM 6011 CB CB . TRP TRP TRP B B 364 364 . 21.796 51.144 -15.255 1.00 11.76 1 .  
.  
ATOM 6012 CG CG . TRP TRP TRP B B 364 364 . 21.834 52.554 -15.799 1.00 12.93 1 .  
.  
ATOM 6013 CD1 CD1 . TRP TRP TRP B B 364 364 . 21.716 53.025 -17.108 1.00 15.79 1 .  
.  
ATOM 6014 NE1 NE1 . TRP TRP TRP B B 364 364 . 21.793 54.442 -17.112 1.00 13.75 1 .  
.  
ATOM 6015 CE2 CE2 . TRP TRP TRP B B 364 364 . 21.959 54.855 -15.806 1.00 14.68 1 .  
.  
ATOM 6016 CD2 CD2 . TRP TRP TRP B B 364 364 . 22.022 53.682 -14.980 1.00 12.00 1 .  
.  
ATOM 6017 CE3 CE3 . TRP TRP TRP B B 364 364 . 22.121 53.827 -13.582 1.00 10.94 1 .  
.  
ATOM 6018 CZ3 CZ3 . TRP TRP TRP B B 364 364 . 22.251 55.107 -13.042 1.00 11.73 1 .  
.  
.



ATOM 6019 CH2 CH2 . TRP TRP TRP B B 364 364 . 22.220 56.253 -13.868 1.00 12.23 1 .  
.ATOM 6020 CZ2 CZ2 . TRP TRP TRP B B 364 364 . 22.108 56.150 -15.274 1.00 14.17 1 .  
.ATOM 6021 C C . TRP TRP TRP B B 364 364 . 22.223 48.780 -15.358 1.00 11.88 1 .  
.ATOM 6022 O O . TRP TRP TRP B B 364 364 . 21.203 48.120 -15.012 1.00 14.45 1 .  
.ATOM 6023 N N . GLY GLY GLY B B 365 365 . 23.460 48.589 -14.881 1.00 12.79 1 .  
.ATOM 6024 CA CA . GLY GLY GLY B B 365 365 . 23.726 47.587 -13.818 1.00 10.97 1 .  
.ATOM 6025 C C . GLY GLY GLY B B 365 365 . 23.366 48.328 -12.502 1.00 11.62 1 .  
.ATOM 6026 O O . GLY GLY GLY B B 365 365 . 23.107 49.542 -12.454 1.00 11.78 1 .  
.ATOM 6027 N N . VAL VAL VAL B B 366 366 . 23.347 47.561 -11.412 1.00 11.20 1 .  
.ATOM 6028 CA CA . VAL VAL VAL B B 366 366 . 23.160 48.128 -10.084 1.00 11.11 1 .  
.ATOM 6029 CB CB . VAL VAL VAL B B 366 366 . 21.639 47.945 -9.604 1.00 10.06 1 .  
.ATOM 6030 CG1 CG1 . VAL VAL VAL B B 366 366 . 21.512 48.428 -8.145 1.00 13.56 1 .  
.ATOM 6031 CG2 CG2 . VAL VAL VAL B B 366 366 . 20.632 48.629 -10.524 1.00 12.62 1 .  
.ATOM 6032 C C . VAL VAL VAL B B 366 366 . 24.066 47.311 -9.134 1.00 11.37 1 .  
.ATOM 6033 O O . VAL VAL VAL B B 366 366 . 24.087 46.053 -9.179 1.00 13.22 1 .  
.ATOM 6034 N N . MET MET MET B B 367 367 . 24.823 48.029 -8.333 1.00 10.21 1 .  
.ATOM 6035 CA CA . MET MET MET B B 367 367 . 25.693 47.452 -7.342 1.00 10.99 1 .  
.ATOM 6036 CB CB . MET MET MET B B 367 367 . 27.165 47.828 -7.589 1.00 10.52 1 .  
.ATOM 6037 CG CG . MET MET MET B B 367 367 . 28.003 47.337 -6.424 1.00 11.07 1 .  
.ATOM 6038 SD SD . MET MET MET B B 367 367 . 29.756 47.792 -6.558 1.00 15.35 1 .  
.ATOM 6039 CE CE . MET MET MET B B 367 367 . 30.415 46.750 -7.883 1.00 20.57 1 .  
.ATOM 6040 C C . MET MET MET B B 367 367 . 25.208 47.884 -5.966 1.00 11.96 1 .  
.ATOM 6041 O O . MET MET MET B B 367 367 . 25.234 49.093 -5.648 1.00 12.49 1 .  
.ATOM 6042 N N . VAL VAL VAL B B 368 368 . 24.692 46.920 -5.182 1.00 11.68 1 .  
.ATOM 6043 CA CA . VAL VAL VAL B B 368 368 . 24.228 47.256 -3.847 1.00 10.78 1 .  
.ATOM 6044 CB CB . VAL VAL VAL B B 368 368 . 23.343 46.118 -3.279 1.00 9.93 1 .  
.ATOM 6045 CG1 CG1 . VAL VAL VAL B B 368 368 . 23.089 46.344 -1.738 1.00 11.88 1 .  
.ATOM 6046 CG2 CG2 . VAL VAL VAL B B 368 368 . 22.042 46.028 -4.015 1.00 11.25 1 .  
.ATOM 6047 C C . VAL VAL VAL B B 368 368 . 25.436 47.549 -2.963 1.00 11.06 1 .  
.ATOM 6048 O O . VAL VAL VAL B B 368 368 . 26.492 46.973 -3.177 1.00 10.96 1 .  
.









ATOM 6169 CG1 CG1 . VAL VAL VAL B B 384 384 . 23.014 41.159 -2.515 1.00 11.50 1 .  
.ATOM 6170 CG2 CG2 . VAL VAL VAL B B 384 384 . 23.100 42.470 -4.730 1.00 10.89 1 .  
.ATOM 6171 C C . VAL VAL VAL B B 384 384 . 20.422 41.078 -4.156 1.00 11.91 1 .  
.ATOM 6172 O O . VAL VAL VAL B B 384 384 . 20.299 41.050 -5.377 1.00 12.53 1 .  
.ATOM 6173 N N . VAL VAL VAL B B 385 385 . 20.082 40.046 -3.380 1.00 10.94 1 .  
.ATOM 6174 CA CA . VAL VAL VAL B B 385 385 . 19.577 38.820 -3.986 1.00 11.63 1 .  
.ATOM 6175 CB CB . VAL VAL VAL B B 385 385 . 19.579 37.630 -2.949 1.00 10.46 1 .  
.ATOM 6176 CG1 CG1 . VAL VAL VAL B B 385 385 . 18.938 36.411 -3.599 1.00 12.89 1 .  
.ATOM 6177 CG2 CG2 . VAL VAL VAL B B 385 385 . 21.076 37.354 -2.652 1.00 12.86 1 .  
.ATOM 6178 C C . VAL VAL VAL B B 385 385 . 18.144 39.059 -4.510 1.00 12.19 1 .  
.ATOM 6179 O O . VAL VAL VAL B B 385 385 . 17.827 38.655 -5.664 1.00 14.76 1 .  
.ATOM 6180 N N . GLY GLY GLY B B 386 386 . 17.295 39.668 -3.677 1.00 12.33 1 .  
.ATOM 6181 CA CA . GLY GLY GLY B B 386 386 . 15.892 39.944 -4.116 1.00 13.77 1 .  
.ATOM 6182 C C . GLY GLY GLY B B 386 386 . 15.807 40.884 -5.328 1.00 14.35 1 .  
.ATOM 6183 O O . GLY GLY GLY B B 386 386 . 14.890 40.745 -6.159 1.00 15.99 1 .  
.ATOM 6184 N N . LEU LEU LEU B B 387 387 . 16.716 41.854 -5.415 1.00 14.43 1 .  
.ATOM 6185 CA CA . LEU LEU LEU B B 387 387 . 16.718 42.822 -6.542 1.00 13.32 1 .  
.ATOM 6186 CB CB . LEU LEU LEU B B 387 387 . 17.338 44.138 -6.075 1.00 13.34 1 .  
.ATOM 6187 CG CG . LEU LEU LEU B B 387 387 . 16.405 44.825 -5.026 1.00 14.41 1 .  
.ATOM 6188 CD1 CD1 . LEU LEU LEU B B 387 387 . 17.030 46.177 -4.722 1.00 17.23 1 .  
.ATOM 6189 CD2 CD2 . LEU LEU LEU B B 387 387 . 14.946 44.969 -5.465 1.00 17.20 1 .  
.ATOM 6190 C C . LEU LEU LEU B B 387 387 . 17.484 42.242 -7.767 1.00 14.53 1 .  
.ATOM 6191 O O . LEU LEU LEU B B 387 387 . 17.579 42.891 -8.874 1.00 16.18 1 .  
.ATOM 6192 N N . CYS CYS CYS B B 388 388 . 18.065 41.042 -7.584 1.00 15.62 1 .  
.ATOM 6193 CA CA . CYS CYS CYS B B 388 388 . 18.768 40.299 -8.629 1.00 17.33 1 .  
.ATOM 6194 CB CB . CYS CYS CYS B B 388 388 . 17.813 39.801 -9.707 1.00 19.21 1 .  
.ATOM 6195 SG SG . CYS CYS CYS B B 388 388 . 16.623 38.732 -9.060 1.00 29.12 1 .  
.ATOM 6196 C C . CYS CYS CYS B B 388 388 . 19.806 41.208 -9.324 1.00 17.34 1 .  
.ATOM 6197 O O . CYS CYS CYS B B 388 388 . 19.916 41.149 -10.570 1.00 18.95 1 .  
.ATOM 6198 N N . THR THR THR B B 389 389 . 20.563 42.009 -8.573 1.00 15.36 1 .  
.





















ATOM 6469 CG CG . HIS HIS HIS B B 425 425 . 33.032 35.346 -16.258 1.00 22.60 1 .  
.  
ATOM 6470 ND1 ND1 . HIS HIS HIS B B 425 425 . 34.122 36.150 -15.998 1.00 26.06 1 .  
.  
ATOM 6471 CE1 CE1 . HIS HIS HIS B B 425 425 . 35.169 35.400 -15.712 1.00 25.44 1 .  
.  
ATOM 6472 NE2 NE2 . HIS HIS HIS B B 425 425 . 34.788 34.136 -15.742 1.00 27.17 1 .  
.  
ATOM 6473 CD2 CD2 . HIS HIS HIS B B 425 425 . 33.445 34.072 -16.059 1.00 24.69 1 .  
.  
ATOM 6474 C C . HIS HIS HIS B B 425 425 . 30.011 37.705 -16.007 1.00 19.98 1 .  
.  
ATOM 6475 O O . HIS HIS HIS B B 425 425 . 30.327 38.717 -16.667 1.00 21.62 1 .  
.  
ATOM 6476 N N . ASN ASN ASN B B 426 426 . 28.758 37.374 -15.675 1.00 19.59 1 .  
.  
ATOM 6477 CA CA . ASN ASN ASN B B 426 426 . 27.554 38.208 -16.060 1.00 21.25 1 .  
.  
ATOM 6478 CB CB . ASN ASN ASN B B 426 426 . 26.394 37.259 -16.415 1.00 22.56 1 .  
.  
ATOM 6479 CG CG . ASN ASN ASN B B 426 426 . 26.737 36.369 -17.606 1.00 28.58 1 .  
.  
ATOM 6480 OD1 OD1 . ASN ASN ASN B B 426 426 . 26.982 36.872 -18.706 1.00 36.13 1 .  
.  
ATOM 6481 ND2 ND2 . ASN ASN ASN B B 426 426 . 26.856 35.051 -17.375 1.00 35.17 1 .  
.  
ATOM 6482 C C . ASN ASN ASN B B 426 426 . 27.109 39.261 -15.023 1.00 17.88 1 .  
.  
ATOM 6483 O O . ASN ASN ASN B B 426 426 . 25.949 39.702 -14.979 1.00 19.22 1 .  
.  
ATOM 6484 N N . PHE PHE PHE B B 427 427 . 28.026 39.594 -14.112 1.00 16.48 1 .  
.  
ATOM 6485 CA CA . PHE PHE PHE B B 427 427 . 27.712 40.538 -13.028 1.00 15.72 1 .  
.  
ATOM 6486 CB CB . PHE PHE PHE B B 427 427 . 28.909 40.723 -12.109 1.00 16.70 1 .  
.  
ATOM 6487 CG CG . PHE PHE PHE B B 427 427 . 29.997 41.615 -12.674 1.00 17.18 1 .  
.  
ATOM 6488 CD1 CD1 . PHE PHE PHE B B 427 427 . 30.951 41.106 -13.548 1.00 19.15 1 .  
.  
ATOM 6489 CE1 CE1 . PHE PHE PHE B B 427 427 . 31.973 41.941 -14.052 1.00 21.75 1 .  
.  
ATOM 6490 CZ CZ . PHE PHE PHE B B 427 427 . 32.023 43.297 -13.641 1.00 18.81 1 .  
.  
ATOM 6491 CE2 CE2 . PHE PHE PHE B B 427 427 . 31.084 43.800 -12.744 1.00 19.80 1 .  
.  
ATOM 6492 CD2 CD2 . PHE PHE PHE B B 427 427 . 30.072 42.959 -12.257 1.00 16.99 1 .  
.  
ATOM 6493 C C . PHE PHE PHE B B 427 427 . 27.150 41.878 -13.537 1.00 16.54 1 .  
.  
ATOM 6494 O O . PHE PHE PHE B B 427 427 . 26.297 42.440 -12.860 1.00 17.15 1 .  
.  
ATOM 6495 N N . ARG ARG ARG B B 428 428 . 27.581 42.332 -14.729 1.00 16.75 1 .  
.  
ATOM 6496 CA CA . ARG ARG ARG B B 428 428 . 27.058 43.602 -15.264 1.00 18.71 1 .  
.  
ATOM 6497 CB CB . ARG ARG ARG B B 428 428 . 27.998 44.132 -16.351 1.00 17.61 1 .  
.  
ATOM 6498 CG CG . ARG ARG ARG B B 428 428 . 29.356 44.585 -15.723 1.00 16.27 1 .  
.  
.









ATOM 6589 O O . HOH HOH HOH S . 36 36 . 38.622 60.189 -2.792 1.00 17.77 1 .  
.  
ATOM 6590 O O . HOH HOH HOH S . 37 37 . 37.844 28.031 17.069 1.00 19.10 1 .  
.  
ATOM 6591 O O . HOH HOH HOH S . 38 38 . 29.508 49.451 46.640 1.00 17.82 1 .  
.  
ATOM 6592 O O . HOH HOH HOH S . 39 39 . 0.867 43.290 10.084 1.00 23.21 1 .  
.  
ATOM 6593 O O . HOH HOH HOH S . 40 40 . 20.349 24.662 27.590 1.00 17.94 1 .  
.  
ATOM 6594 O O . HOH HOH HOH S . 41 41 . 46.727 36.906 27.384 1.00 15.61 1 .  
.  
ATOM 6595 O O . HOH HOH HOH S . 42 42 . 27.634 47.636 -16.099 1.00 21.58 1 .  
.  
ATOM 6596 O O . HOH HOH HOH S . 43 43 . 34.518 39.473 38.787 1.00 17.23 1 .  
.  
ATOM 6597 O O . HOH HOH HOH S . 44 44 . 25.368 64.607 20.256 1.00 17.74 1 .  
.  
ATOM 6598 O O . HOH HOH HOH S . 45 45 . 31.432 50.415 -7.414 1.00 14.62 1 .  
.  
ATOM 6599 O O . HOH HOH HOH S . 46 46 . 38.550 31.357 12.582 1.00 17.50 1 .  
.  
ATOM 6600 O O . HOH HOH HOH S . 47 47 . 39.898 25.902 21.049 1.00 16.49 1 .  
.  
ATOM 6601 O O . HOH HOH HOH S . 48 48 . 43.364 42.133 8.682 1.00 20.76 1 .  
.  
ATOM 6602 O O . HOH HOH HOH S . 49 49 . 23.122 36.648 22.481 1.00 21.29 1 .  
.  
ATOM 6603 O O . HOH HOH HOH S . 50 50 . 23.569 48.681 5.058 1.00 16.94 1 .  
.  
ATOM 6604 O O . HOH HOH HOH S . 51 51 . 30.043 69.355 -6.281 1.00 17.15 1 .  
.  
ATOM 6605 O O . HOH HOH HOH S . 52 52 . 27.740 22.976 5.602 1.00 16.67 1 .  
.  
ATOM 6606 O O . HOH HOH HOH S . 53 53 . 18.933 61.647 -2.200 1.00 19.24 1 .  
.  
ATOM 6607 O O . HOH HOH HOH S . 54 54 . 39.553 22.928 3.918 1.00 16.12 1 .  
.  
ATOM 6608 O O . HOH HOH HOH S . 55 55 . 30.685 61.824 -7.730 1.00 15.17 1 .  
.  
ATOM 6609 O O . HOH HOH HOH S . 56 56 . 26.615 56.446 12.840 1.00 19.95 1 .  
.  
ATOM 6610 O O . HOH HOH HOH S . 57 57 . 34.464 33.937 23.690 1.00 16.76 1 .  
.  
ATOM 6611 O O . HOH HOH HOH S . 58 58 . 37.183 52.053 12.157 1.00 17.00 1 .  
.  
ATOM 6612 O O . HOH HOH HOH S . 59 59 . 30.256 56.442 11.614 1.00 19.45 1 .  
.  
ATOM 6613 O O . HOH HOH HOH S . 60 60 . 41.043 34.092 13.024 1.00 20.93 1 .  
.  
ATOM 6614 O O . HOH HOH HOH S . 61 61 . 28.719 18.389 6.254 1.00 24.14 1 .  
.  
ATOM 6615 O O . HOH HOH HOH S . 62 62 . 15.556 54.488 23.257 1.00 21.40 1 .  
.  
ATOM 6616 O O . HOH HOH HOH S . 63 63 . 32.680 34.779 21.688 1.00 17.29 1 .  
.  
ATOM 6617 O O . HOH HOH HOH S . 64 64 . 24.119 68.318 -10.267 1.00 18.00 1 .  
.  
ATOM 6618 O O . HOH HOH HOH S . 65 65 . 26.313 65.610 -19.546 1.00 19.54 1 .  
.  
.



ATOM 6649 O O . HOH HOH HOH S . 96 96 . 30.238 65.829 -22.282 1.00 21.11 1 .  
.  
ATOM 6650 O O . HOH HOH HOH S . 97 97 . 47.951 27.681 27.848 1.00 18.89 1 .  
.  
ATOM 6651 O O . HOH HOH HOH S . 98 98 . 35.260 15.202 9.563 1.00 20.17 1 .  
.  
ATOM 6652 O O . HOH HOH HOH S . 99 99 . 24.768 40.038 15.383 1.00 20.27 1 .  
.  
ATOM 6653 O O . HOH HOH HOH S . 100 100 . 30.015 50.162 42.569 1.00 24.17 1 .  
.  
ATOM 6654 O O . HOH HOH HOH S . 101 101 . 19.489 32.321 16.934 1.00 22.89 1 .  
.  
ATOM 6655 O O . HOH HOH HOH S . 102 102 . 45.452 43.589 9.998 1.00 22.01 1 .  
.  
ATOM 6656 O O . HOH HOH HOH S . 103 103 . 21.848 21.396 32.770 1.00 22.83 1 .  
.  
ATOM 6657 O O . HOH HOH HOH S . 104 104 . 3.897 47.749 -1.142 1.00 26.51 1 .  
.  
ATOM 6658 O O . HOH HOH HOH S . 105 105 . -0.015 49.013 11.486 1.00 23.18 1 .  
.  
ATOM 6659 O O . HOH HOH HOH S . 106 106 . 38.333 70.053 -15.202 1.00 20.80 1 .  
.  
ATOM 6660 O O . HOH HOH HOH S . 107 107 . 30.632 65.685 -1.515 1.00 22.48 1 .  
.  
ATOM 6661 O O . HOH HOH HOH S . 108 108 . 1.713 49.154 0.046 1.00 21.98 1 .  
.  
ATOM 6662 O O . HOH HOH HOH S . 109 109 . 36.833 76.756 -12.008 1.00 18.24 1 .  
.  
ATOM 6663 O O . HOH HOH HOH S . 110 110 . 21.944 57.135 11.916 1.00 16.60 1 .  
.  
ATOM 6664 O O . HOH HOH HOH S . 111 111 . 26.768 47.963 -18.416 1.00 32.73 1 .  
.  
ATOM 6665 O O . HOH HOH HOH S . 112 112 . 40.361 46.418 -18.159 1.00 24.36 1 .  
.  
ATOM 6666 O O . HOH HOH HOH S . 113 113 . 34.211 57.104 -28.410 1.00 24.86 1 .  
.  
ATOM 6667 O O . HOH HOH HOH S . 114 114 . 23.298 63.552 21.781 1.00 19.57 1 .  
.  
ATOM 6668 O O . HOH HOH HOH S . 115 115 . 14.526 36.107 6.239 1.00 24.36 1 .  
.  
ATOM 6669 O O . HOH HOH HOH S . 116 116 . 39.654 53.945 6.455 1.00 22.06 1 .  
.  
ATOM 6670 O O . HOH HOH HOH S . 117 117 . 19.782 54.229 -20.940 1.00 29.10 1 .  
.  
ATOM 6671 O O . HOH HOH HOH S . 118 118 . 41.980 52.152 -21.973 1.00 20.75 1 .  
.  
ATOM 6672 O O . HOH HOH HOH S . 119 119 . 50.083 34.724 27.530 1.00 21.47 1 .  
.  
ATOM 6673 O O . HOH HOH HOH S . 120 120 . -0.131 64.087 2.604 1.00 25.80 1 .  
.  
ATOM 6674 O O . HOH HOH HOH S . 121 121 . 50.264 33.384 30.398 1.00 20.87 1 .  
.  
ATOM 6675 O O . HOH HOH HOH S . 122 122 . 46.925 60.060 -5.377 1.00 22.82 1 .  
.  
ATOM 6676 O O . HOH HOH HOH S . 123 123 . 31.710 64.230 23.374 1.00 31.03 1 .  
.  
ATOM 6677 O O . HOH HOH HOH S . 124 124 . 38.854 53.935 -24.039 1.00 35.60 1 .  
.  
ATOM 6678 O O . HOH HOH HOH S . 125 125 . 40.663 54.126 12.409 1.00 23.21 1 .  
.

ATOM 6679 O O . HOH HOH HOH S . 126 126 . 19.762 25.379 8.381 1.00 24.46 1 .  
.  
ATOM 6680 O O . HOH HOH HOH S . 127 127 . 30.493 32.910 20.085 1.00 20.79 1 .  
.  
ATOM 6681 O O . HOH HOH HOH S . 128 128 . 30.660 59.531 18.524 1.00 24.73 1 .  
.  
ATOM 6682 O O . HOH HOH HOH S . 129 129 . 22.831 16.866 10.389 1.00 21.67 1 .  
.  
ATOM 6683 O O . HOH HOH HOH S . 130 130 . 9.791 63.211 3.465 1.00 23.18 1 .  
.  
ATOM 6684 O O . HOH HOH HOH S . 131 131 . 43.887 21.351 13.701 1.00 27.71 1 .  
.  
ATOM 6685 O O . HOH HOH HOH S . 132 132 . 22.457 70.667 -10.760 1.00 27.50 1 .  
.  
ATOM 6686 O O . HOH HOH HOH S . 133 133 . 47.250 49.556 6.303 1.00 22.03 1 .  
.  
ATOM 6687 O O . HOH HOH HOH S . 134 134 . 4.960 40.134 10.815 1.00 21.72 1 .  
.  
ATOM 6688 O O . HOH HOH HOH S . 135 135 . 13.542 25.374 21.858 1.00 19.10 1 .  
.  
ATOM 6689 O O . HOH HOH HOH S . 136 136 . 20.004 41.840 10.098 1.00 27.20 1 .  
.  
ATOM 6690 O O . HOH HOH HOH S . 137 137 . 16.878 31.773 22.514 1.00 26.06 1 .  
.  
ATOM 6691 O O . HOH HOH HOH S . 138 138 . 26.008 23.977 3.933 1.00 26.70 1 .  
.  
ATOM 6692 O O . HOH HOH HOH S . 139 139 . 23.632 48.862 8.998 1.00 18.31 1 .  
.  
ATOM 6693 O O . HOH HOH HOH S . 140 140 . 47.185 51.631 39.985 1.00 25.84 1 .  
.  
ATOM 6694 O O . HOH HOH HOH S . 141 141 . 53.556 56.138 -4.291 1.00 27.41 1 .  
.  
ATOM 6695 O O . HOH HOH HOH S . 142 142 . 39.288 49.955 4.455 1.00 25.77 1 .  
.  
ATOM 6696 O O . HOH HOH HOH S . 143 143 . 25.418 55.318 25.198 1.00 19.86 1 .  
.  
ATOM 6697 O O . HOH HOH HOH S . 144 144 . 31.456 63.055 -1.681 1.00 23.24 1 .  
.  
ATOM 6698 O O . HOH HOH HOH S . 145 145 . 33.740 49.411 -0.589 1.00 19.09 1 .  
.  
ATOM 6699 O O . HOH HOH HOH S . 146 146 . 27.727 50.133 41.008 1.00 23.28 1 .  
.  
ATOM 6700 O O . HOH HOH HOH S . 147 147 . 32.708 28.310 3.322 1.00 27.89 1 .  
.  
ATOM 6701 O O . HOH HOH HOH S . 148 148 . 16.981 35.784 4.905 1.00 29.66 1 .  
.  
ATOM 6702 O O . HOH HOH HOH S . 149 149 . 18.580 54.806 23.172 1.00 23.95 1 .  
.  
ATOM 6703 O O . HOH HOH HOH S . 150 150 . 25.854 33.775 13.433 1.00 32.01 1 .  
.  
ATOM 6704 O O . HOH HOH HOH S . 151 151 . 15.983 16.072 11.100 1.00 23.92 1 .  
.  
ATOM 6705 O O . HOH HOH HOH S . 152 152 . 29.650 58.356 10.092 1.00 27.21 1 .  
.  
ATOM 6706 O O . HOH HOH HOH S . 153 153 . 26.718 72.233 -6.181 1.00 31.70 1 .  
.  
ATOM 6707 O O . HOH HOH HOH S . 154 154 . 5.606 39.724 -0.674 1.00 24.82 1 .  
.  
ATOM 6708 O O . HOH HOH HOH S . 155 155 . 45.418 31.107 -3.041 1.00 27.41 1 .  
.

ATOM 6709 O O . HOH HOH HOH S . 156 156 . 37.227 50.546 -21.872 1.00 23.03 1 .  
.  
ATOM 6710 O O . HOH HOH HOH S . 157 157 . 15.043 40.884 12.973 1.00 22.87 1 .  
.  
ATOM 6711 O O . HOH HOH HOH S . 158 158 . 32.977 11.474 13.428 1.00 24.19 1 .  
.  
ATOM 6712 O O . HOH HOH HOH S . 159 159 . 46.508 56.099 6.969 1.00 24.54 1 .  
.  
ATOM 6713 O O . HOH HOH HOH S . 160 160 . 30.146 52.892 -24.706 1.00 28.85 1 .  
.  
ATOM 6714 O O . HOH HOH HOH S . 161 161 . -4.369 52.887 7.006 1.00 25.44 1 .  
.  
ATOM 6715 O O . HOH HOH HOH S . 162 162 . 48.779 27.379 20.382 1.00 33.64 1 .  
.  
ATOM 6716 O O . HOH HOH HOH S . 163 163 . 32.441 37.313 39.624 1.00 26.05 1 .  
.  
ATOM 6717 O O . HOH HOH HOH S . 164 164 . 2.173 60.999 15.223 1.00 24.64 1 .  
.  
ATOM 6718 O O . HOH HOH HOH S . 165 165 . 7.916 48.938 -1.707 1.00 28.09 1 .  
.  
ATOM 6719 O O . HOH HOH HOH S . 166 166 . 57.074 46.803 23.580 1.00 29.24 1 .  
.  
ATOM 6720 O O . HOH HOH HOH S . 167 167 . 13.148 64.672 18.072 1.00 29.00 1 .  
.  
ATOM 6721 O O . HOH HOH HOH S . 168 168 . 28.012 32.255 38.357 1.00 27.36 1 .  
.  
ATOM 6722 O O . HOH HOH HOH S . 169 169 . 23.659 50.218 39.415 1.00 30.87 1 .  
.  
ATOM 6723 O O . HOH HOH HOH S . 170 170 . 51.521 58.359 1.870 1.00 27.12 1 .  
.  
ATOM 6724 O O . HOH HOH HOH S . 171 171 . 39.764 20.929 2.114 1.00 25.21 1 .  
.  
ATOM 6725 O O . HOH HOH HOH S . 172 172 . 23.135 9.120 21.750 1.00 30.28 1 .  
.  
ATOM 6726 O O . HOH HOH HOH S . 173 173 . 34.583 27.403 -0.351 1.00 24.87 1 .  
.  
ATOM 6727 O O . HOH HOH HOH S . 174 174 . 51.942 40.036 23.537 1.00 23.20 1 .  
.  
ATOM 6728 O O . HOH HOH HOH S . 175 175 . -1.022 54.664 18.029 1.00 30.54 1 .  
.  
ATOM 6729 O O . HOH HOH HOH S . 176 176 . 51.809 37.079 0.526 1.00 25.45 1 .  
.  
ATOM 6730 O O . HOH HOH HOH S . 177 177 . 47.642 63.653 -0.974 1.00 28.80 1 .  
.  
ATOM 6731 O O . HOH HOH HOH S . 178 178 . 47.794 58.566 -9.490 1.00 33.22 1 .  
.  
ATOM 6732 O O . HOH HOH HOH S . 179 179 . 34.230 58.953 13.380 1.00 30.69 1 .  
.  
ATOM 6733 O O . HOH HOH HOH S . 180 180 . 11.713 38.438 8.455 1.00 25.27 1 .  
.  
ATOM 6734 O O . HOH HOH HOH S . 181 181 . 53.227 52.251 4.475 1.00 25.39 1 .  
.  
ATOM 6735 O O . HOH HOH HOH S . 182 182 . 14.890 32.975 24.197 1.00 27.41 1 .  
.  
ATOM 6736 O O . HOH HOH HOH S . 183 183 . 50.190 39.142 21.678 1.00 22.30 1 .  
.  
ATOM 6737 O O . HOH HOH HOH S . 184 184 . 32.763 68.438 -4.675 1.00 38.71 1 .  
.  
ATOM 6738 O O . HOH HOH HOH S . 185 185 . 22.425 65.365 23.720 1.00 27.41 1 .  
.



ATOM 6739 O O . HOH HOH HOH S . 186 186 . 50.724 34.861 45.435 1.00 32.92 1 .  
.  
ATOM 6740 O O . HOH HOH HOH S . 187 187 . 14.446 68.266 12.899 1.00 40.38 1 .  
.  
ATOM 6741 O O . HOH HOH HOH S . 188 188 . 24.488 57.526 26.771 1.00 28.32 1 .  
.  
ATOM 6742 O O . HOH HOH HOH S . 189 189 . 50.026 32.515 24.124 1.00 27.16 1 .  
.  
ATOM 6743 O O . HOH HOH HOH S . 190 190 . 21.500 55.807 -19.772 1.00 20.01 1 .  
.  
ATOM 6744 O O . HOH HOH HOH S . 191 191 . 30.790 58.091 39.373 1.00 36.21 1 .  
.  
ATOM 6745 O O . HOH HOH HOH S . 192 192 . 24.978 58.443 29.295 1.00 27.17 1 .  
.  
ATOM 6746 O O . HOH HOH HOH S . 193 193 . 45.003 43.938 20.799 1.00 24.30 1 .  
.  
ATOM 6747 O O . HOH HOH HOH S . 194 194 . 19.787 67.559 -7.996 1.00 31.50 1 .  
.  
ATOM 6748 O O . HOH HOH HOH S . 195 195 . 11.255 62.441 1.177 1.00 25.63 1 .  
.  
ATOM 6749 O O . HOH HOH HOH S . 196 196 . 45.930 41.762 44.473 1.00 30.87 1 .  
.  
ATOM 6750 O O . HOH HOH HOH S . 197 197 . 41.625 64.450 20.616 1.00 35.40 1 .  
.  
ATOM 6751 O O . HOH HOH HOH S . 198 198 . 23.302 54.974 23.611 1.00 28.80 1 .  
.  
ATOM 6752 O O . HOH HOH HOH S . 199 199 . 33.496 44.122 45.087 1.00 29.09 1 .  
.  
ATOM 6753 O O . HOH HOH HOH S . 200 200 . 48.502 55.070 5.807 1.00 34.21 1 .  
.  
ATOM 6754 O O . HOH HOH HOH S . 201 201 . 31.498 26.152 -4.706 1.00 34.95 1 .  
.  
ATOM 6755 O O . HOH HOH HOH S . 202 202 . 20.320 35.801 9.108 1.00 31.49 1 .  
.  
ATOM 6756 O O . HOH HOH HOH S . 203 203 . 41.874 57.861 35.566 1.00 25.92 1 .  
.  
ATOM 6757 O O . HOH HOH HOH S . 204 204 . 25.480 64.891 2.479 1.00 31.04 1 .  
.  
ATOM 6758 O O . HOH HOH HOH S . 205 205 . 20.850 45.216 14.836 1.00 40.79 1 .  
.  
ATOM 6759 O O . HOH HOH HOH S . 206 206 . 27.697 52.798 -21.328 1.00 22.05 1 .  
.  
ATOM 6760 O O . HOH HOH HOH S . 207 207 . 19.696 42.719 47.330 1.00 37.86 1 .  
.  
ATOM 6761 O O . HOH HOH HOH S . 208 208 . 49.296 50.398 -23.993 1.00 27.76 1 .  
.  
ATOM 6762 O O . HOH HOH HOH S . 209 209 . 25.545 29.145 -6.845 1.00 35.15 1 .  
.  
ATOM 6763 O O . HOH HOH HOH S . 210 210 . 48.769 64.600 20.907 1.00 26.08 1 .  
.  
ATOM 6764 O O . HOH HOH HOH S . 211 211 . 27.116 26.845 3.252 1.00 34.09 1 .  
.  
ATOM 6765 O O . HOH HOH HOH S . 212 212 . 22.160 66.628 11.454 1.00 31.88 1 .  
.  
ATOM 6766 O O . HOH HOH HOH S . 213 213 . 24.061 68.762 1.435 1.00 33.07 1 .  
.  
ATOM 6767 O O . HOH HOH HOH S . 214 214 . 42.070 31.666 5.689 1.00 32.97 1 .  
.  
ATOM 6768 O O . HOH HOH HOH S . 215 215 . 14.866 67.364 15.144 1.00 35.34 1 .  
.

ATOM 6769 O O . HOH HOH HOH S . 216 216 . 39.957 14.359 14.092 1.00 33.44 1 .  
.  
ATOM 6770 O O . HOH HOH HOH S . 217 217 . 45.200 38.391 45.372 1.00 28.24 1 .  
.  
ATOM 6771 O O . HOH HOH HOH S . 218 218 . 33.402 60.599 15.764 1.00 37.22 1 .  
.  
ATOM 6772 O O . HOH HOH HOH S . 219 219 . 15.140 64.529 -13.183 1.00 33.41 1 .  
.  
ATOM 6773 O O . HOH HOH HOH S . 220 220 . 29.307 41.141 -16.944 1.00 30.01 1 .  
.  
ATOM 6774 O O . HOH HOH HOH S . 221 221 . 55.304 28.012 27.858 1.00 37.72 1 .  
.  
ATOM 6775 O O . HOH HOH HOH S . 222 222 . 35.116 26.906 -2.713 1.00 27.18 1 .  
.  
ATOM 6776 O O . HOH HOH HOH S . 223 223 . 17.192 15.793 21.523 1.00 27.54 1 .  
.  
ATOM 6777 O O . HOH HOH HOH S . 224 224 . 43.799 29.478 16.455 1.00 26.07 1 .  
.  
ATOM 6778 O O . HOH HOH HOH S . 225 225 . 17.821 40.664 38.220 1.00 38.37 1 .  
.  
ATOM 6779 O O . HOH HOH HOH S . 226 226 . 13.110 30.588 14.020 1.00 33.40 1 .  
.  
ATOM 6780 O O . HOH HOH HOH S . 227 227 . 25.332 23.728 32.206 1.00 29.91 1 .  
.  
ATOM 6781 O O . HOH HOH HOH S . 228 228 . 26.008 12.084 6.636 1.00 27.83 1 .  
.  
ATOM 6782 O O . HOH HOH HOH S . 229 229 . -3.288 46.613 5.526 1.00 27.28 1 .  
.  
ATOM 6783 O O . HOH HOH HOH S . 230 230 . 12.294 59.010 -4.193 1.00 32.02 1 .  
.  
ATOM 6784 O O . HOH HOH HOH S . 231 231 . 58.411 44.256 18.288 1.00 27.65 1 .  
.  
ATOM 6785 O O . HOH HOH HOH S . 232 232 . 19.024 37.852 24.965 1.00 30.78 1 .  
.  
ATOM 6786 O O . HOH HOH HOH S . 233 233 . 44.219 31.950 -12.516 1.00 35.69 1 .  
.  
ATOM 6787 O O . HOH HOH HOH S . 234 234 . 36.773 17.101 26.883 1.00 26.12 1 .  
.  
ATOM 6788 O O . HOH HOH HOH S . 235 235 . 22.275 23.690 -0.266 1.00 37.59 1 .  
.  
ATOM 6789 O O . HOH HOH HOH S . 236 236 . 56.889 42.476 42.365 1.00 43.72 1 .  
.  
ATOM 6790 O O . HOH HOH HOH S . 237 237 . 45.219 23.601 21.413 1.00 28.41 1 .  
.  
ATOM 6791 O O . HOH HOH HOH S . 238 238 . 11.978 46.319 22.103 1.00 27.62 1 .  
.  
ATOM 6792 O O . HOH HOH HOH S . 239 239 . 20.337 68.577 15.217 1.00 31.39 1 .  
.  
ATOM 6793 O O . HOH HOH HOH S . 240 240 . 49.401 56.960 -10.441 1.00 29.86 1 .  
.  
ATOM 6794 O O . HOH HOH HOH S . 241 241 . 4.887 64.056 18.090 1.00 36.31 1 .  
.  
ATOM 6795 O O . HOH HOH HOH S . 242 242 . 42.499 53.960 6.668 1.00 31.00 1 .  
.  
ATOM 6796 O O . HOH HOH HOH S . 243 243 . 24.376 60.498 27.957 1.00 26.48 1 .  
.  
ATOM 6797 O O . HOH HOH HOH S . 244 244 . 46.811 62.270 -17.357 1.00 32.27 1 .  
.  
ATOM 6798 O O . HOH HOH HOH S . 245 245 . 0.288 41.882 14.220 1.00 30.40 1 .  
.

ATOM 6799 O O . HOH HOH HOH S . 246 246 . 44.236 24.330 18.946 1.00 28.38 1 .  
.  
ATOM 6800 O O . HOH HOH HOH S . 247 247 . 24.770 12.880 29.253 1.00 31.18 1 .  
.  
ATOM 6801 O O . HOH HOH HOH S . 248 248 . 42.349 49.625 -23.124 1.00 29.48 1 .  
.  
ATOM 6802 O O . HOH HOH HOH S . 249 249 . 35.893 15.367 25.133 1.00 24.57 1 .  
.  
ATOM 6803 O O . HOH HOH HOH S . 250 250 . 19.417 67.285 -11.344 1.00 35.84 1 .  
.  
ATOM 6804 O O . HOH HOH HOH S . 251 251 . 19.962 39.980 20.047 1.00 31.79 1 .  
.  
ATOM 6805 O O . HOH HOH HOH S . 252 252 . 49.283 51.903 -21.284 1.00 36.76 1 .  
.  
ATOM 6806 O O . HOH HOH HOH S . 253 253 . 25.781 29.814 -11.339 1.00 34.71 1 .  
.  
ATOM 6807 O O . HOH HOH HOH S . 254 254 . 39.815 40.240 40.989 1.00 30.91 1 .  
.  
ATOM 6808 O O . HOH HOH HOH S . 255 255 . 17.462 35.820 24.251 1.00 25.35 1 .  
.  
ATOM 6809 O O . HOH HOH HOH S . 256 256 . 57.779 54.364 21.510 1.00 34.71 1 .  
.  
ATOM 6810 O O . HOH HOH HOH S . 257 257 . 36.690 74.058 -4.755 1.00 34.76 1 .  
.  
ATOM 6811 O O . HOH HOH HOH S . 258 258 . 37.396 28.729 -8.429 1.00 33.11 1 .  
.  
ATOM 6812 O O . HOH HOH HOH S . 259 259 . 42.399 32.398 14.300 1.00 30.70 1 .  
.  
ATOM 6813 O O . HOH HOH HOH S . 260 260 . 15.570 59.791 22.186 1.00 30.78 1 .  
.  
ATOM 6814 O O . HOH HOH HOH S . 261 261 . 2.607 50.146 21.185 1.00 37.56 1 .  
.  
ATOM 6815 O O . HOH HOH HOH S . 262 262 . 18.534 48.005 41.151 1.00 60.42 1 .  
.  
ATOM 6816 O O . HOH HOH HOH S . 263 263 . 48.070 43.879 -15.427 1.00 42.51 1 .  
.  
ATOM 6817 O O . HOH HOH HOH S . 264 264 . 19.209 66.499 -18.398 1.00 23.62 1 .  
.  
ATOM 6818 O O . HOH HOH HOH S . 265 265 . 44.595 64.484 -21.626 1.00 39.99 1 .  
.  
ATOM 6819 O O . HOH HOH HOH S . 266 266 . 14.820 15.683 28.542 1.00 31.27 1 .  
.  
ATOM 6820 O O . HOH HOH HOH S . 267 267 . 62.950 43.262 26.029 1.00 38.72 1 .  
.  
ATOM 6821 O O . HOH HOH HOH S . 268 268 . 46.166 71.141 -15.928 1.00 34.84 1 .  
.  
ATOM 6822 O O . HOH HOH HOH S . 269 269 . 55.468 30.616 25.611 1.00 28.54 1 .  
.  
ATOM 6823 O O . HOH HOH HOH S . 270 270 . 19.229 22.340 32.811 1.00 33.31 1 .  
.  
ATOM 6824 O O . HOH HOH HOH S . 271 271 . 50.040 53.443 -19.827 1.00 39.54 1 .  
.  
ATOM 6825 O O . HOH HOH HOH S . 272 272 . 23.246 26.151 -3.402 1.00 33.26 1 .  
.  
ATOM 6826 O O . HOH HOH HOH S . 273 273 . 18.495 30.541 39.472 1.00 35.80 1 .  
.  
ATOM 6827 O O . HOH HOH HOH S . 274 274 . 55.956 53.055 -2.869 1.00 63.31 1 .  
.  
ATOM 6828 O O . HOH HOH HOH S . 275 275 . 48.472 33.539 -11.461 1.00 36.35 1 .  
.





















ATOM 7099 O O . HOH HOH HOH S . 546 546 . 47.241 73.217 2.792 1.00 50.02 1 .  
.  
ATOM 7100 O O . HOH HOH HOH S . 547 547 . 49.035 70.426 -12.935 1.00 51.24 1 .  
.  
ATOM 7101 O O . HOH HOH HOH S . 548 548 . 48.088 64.062 -15.988 1.00 48.98 1 .  
.  
ATOM 7102 O O . HOH HOH HOH S . 549 549 . 34.271 67.187 -19.911 1.00 25.34 1 .  
.  
ATOM 7103 O O . HOH HOH HOH S . 550 550 . 45.432 57.694 -21.785 1.00 33.86 1 .  
.  
ATOM 7104 O O . HOH HOH HOH S . 551 551 . 45.491 54.211 -23.068 1.00 40.58 1 .  
.  
ATOM 7105 O O . HOH HOH HOH S . 552 552 . 48.173 59.760 -18.004 1.00 59.13 1 .  
.  
ATOM 7106 O O . HOH HOH HOH S . 553 553 . 38.557 59.760 -21.786 1.00 40.37 1 .  
.  
ATOM 7107 O O . HOH HOH HOH S . 554 554 . 42.625 45.903 -18.620 1.00 32.97 1 .  
.  
ATOM 7108 O O . HOH HOH HOH S . 555 555 . 27.532 56.630 -23.576 1.00 17.10 1 .  
.  
ATOM 7109 O O . HOH HOH HOH S . 556 556 . 26.708 60.676 -24.493 1.00 32.51 1 .  
.  
ATOM 7110 O O . HOH HOH HOH S . 557 557 . 25.881 54.805 -22.170 1.00 25.45 1 .  
.  
ATOM 7111 O O . HOH HOH HOH S . 558 558 . 27.152 56.751 -26.245 1.00 39.79 1 .  
.  
ATOM 7112 O O . HOH HOH HOH S . 559 559 . 35.992 47.429 -21.766 1.00 34.13 1 .  
.  
ATOM 7113 O O . HOH HOH HOH S . 560 560 . 34.559 46.078 -20.082 1.00 31.04 1 .  
.  
ATOM 7114 O O . HOH HOH HOH S . 561 561 . 33.598 44.196 -18.081 1.00 40.20 1 .  
.  
ATOM 7115 O O . HOH HOH HOH S . 562 562 . 15.612 60.188 -18.187 1.00 35.10 1 .  
.  
ATOM 7116 O O . HOH HOH HOH S . 563 563 . 19.377 58.086 -22.883 1.00 34.24 1 .  
.  
ATOM 7117 O O . HOH HOH HOH S . 564 564 . 25.322 63.679 -22.964 1.00 40.12 1 .  
.  
ATOM 7118 O O . HOH HOH HOH S . 565 565 . 23.485 65.887 -22.390 1.00 40.21 1 .  
.  
ATOM 7119 O O . HOH HOH HOH S . 566 566 . 10.510 61.787 -1.021 1.00 39.19 1 .  
.  
ATOM 7120 O O . HOH HOH HOH S . 567 567 . 13.216 61.437 -5.409 1.00 33.84 1 .  
.  
ATOM 7121 O O . HOH HOH HOH S . 568 568 . 7.826 47.067 -7.807 1.00 44.82 1 .  
.  
ATOM 7122 O O . HOH HOH HOH S . 569 569 . 11.020 52.852 -10.737 1.00 39.15 1 .  
.  
ATOM 7123 O O . HOH HOH HOH S . 570 570 . 12.475 54.923 -17.463 1.00 40.39 1 .  
.  
ATOM 7124 O O . HOH HOH HOH S . 571 571 . 17.327 54.387 -21.703 1.00 31.52 1 .  
.  
ATOM 7125 O O . HOH HOH HOH S . 572 572 . 22.563 51.721 -21.720 1.00 46.61 1 .  
.  
ATOM 7126 O O . HOH HOH HOH S . 573 573 . 20.954 44.778 -12.210 1.00 28.88 1 .  
.  
ATOM 7127 O O . HOH HOH HOH S . 574 574 . 20.868 45.240 -14.310 1.00 41.23 1 .  
.  
ATOM 7128 O O . HOH HOH HOH S . 575 575 . 20.728 42.302 -16.731 1.00 29.05 1 .  
.

ATOM 7129 O O . HOH HOH HOH S . 576 576 . 16.451 33.418 -17.457 1.00 43.54 1 .  
.  
ATOM 7130 O O . HOH HOH HOH S . 577 577 . 23.983 35.999 18.469 1.00 31.69 1 .  
.  
ATOM 7131 O O . HOH HOH HOH S . 578 578 . 38.889 58.071 2.657 1.00 35.93 1 .  
.  
ATOM 7132 O O . HOH HOH HOH S . 579 579 . 17.898 41.101 25.054 1.00 37.42 1 .  
.  
ATOM 7133 O O . HOH HOH HOH S . 580 580 . 36.442 64.655 -19.519 1.00 37.90 1 .  
.  
ATOM 7134 O O . HOH HOH HOH S . 581 581 . 25.242 33.924 15.267 1.00 38.21 1 .  
.  
ATOM 7135 O O . HOH HOH HOH S . 582 582 . 45.006 33.860 44.572 1.00 31.89 1 .  
.  
ATOM 7136 O O . HOH HOH HOH S . 583 583 . 37.780 20.634 0.077 1.00 38.53 1 .  
.  
ATOM 7137 O O . HOH HOH HOH S . 584 584 . 26.743 30.736 40.712 1.00 35.24 1 .  
.  
ATOM 7138 O O . HOH HOH HOH S . 585 585 . 21.308 34.686 11.390 1.00 27.05 1 .  
.  
ATOM 7139 O O . HOH HOH HOH S . 586 586 . 51.525 50.902 13.139 1.00 36.44 1 .  
.  
ATOM 7140 O O . HOH HOH HOH S . 587 587 . 38.774 47.173 42.896 1.00 32.69 1 .  
.  
ATOM 7141 O O . HOH HOH HOH S . 588 588 . 20.113 66.326 22.057 1.00 39.61 1 .  
.  
ATOM 7142 O O . HOH HOH HOH S . 589 589 . 10.577 35.080 -5.647 1.00 45.79 1 .  
.  
ATOM 7143 O O . HOH HOH HOH S . 590 590 . 17.894 65.692 -5.991 1.00 39.90 1 .  
.  
ATOM 7144 O O . HOH HOH HOH S . 591 591 . 51.457 46.821 -15.088 1.00 50.59 1 .  
.  
ATOM 7145 O O . HOH HOH HOH S . 592 592 . 17.159 51.179 -22.624 1.00 45.53 1 .  
.  
ATOM 7146 O O . HOH HOH HOH S . 593 593 . 39.268 14.801 12.144 1.00 32.21 1 .  
.  
ATOM 7147 O O . HOH HOH HOH S . 594 594 . 18.567 32.544 4.497 1.00 37.01 1 .  
.  
ATOM 7148 O O . HOH HOH HOH S . 595 595 . 28.878 59.666 33.728 1.00 39.10 1 .  
.  
ATOM 7149 O O . HOH HOH HOH S . 596 596 . 21.610 38.028 9.419 1.00 40.13 1 .  
.  
ATOM 7150 O O . HOH HOH HOH S . 597 597 . 24.260 67.156 6.776 1.00 53.55 1 .  
.  
ATOM 7151 O O . HOH HOH HOH S . 598 598 . 20.340 59.593 27.228 1.00 44.07 1 .  
.  
ATOM 7152 O O . HOH HOH HOH S . 599 599 . 19.167 33.519 22.225 1.00 28.53 1 .  
.  
ATOM 7153 O O . HOH HOH HOH S . 600 600 . 19.170 41.437 17.759 1.00 36.53 1 .  
.  
ATOM 7154 O O . HOH HOH HOH S . 601 601 . 18.871 51.755 25.270 1.00 35.77 1 .  
.  
ATOM 7155 O O . HOH HOH HOH S . 602 602 . 6.582 33.723 9.190 1.00 34.82 1 .  
.  
ATOM 7156 O O . HOH HOH HOH S . 603 603 . 16.756 42.581 -12.909 1.00 54.99 1 .  
.  
ATOM 7157 O O . HOH HOH HOH S . 604 604 . 17.705 32.543 8.930 1.00 42.45 1 .  
.  
ATOM 7158 O O . HOH HOH HOH S . 605 605 . 12.699 37.587 10.957 1.00 39.82 1 .  
.



ATOM 7189 O O . HOH HOH HOH S . 636 636 . 27.845 60.752 30.653 1.00 45.34 1 .  
.  
ATOM 7190 O O . HOH HOH HOH S . 637 637 . 47.532 63.481 30.865 1.00 45.36 1 .  
.  
ATOM 7191 O O . HOH HOH HOH S . 638 638 . 32.916 65.382 30.190 1.00 47.40 1 .  
.  
ATOM 7192 O O . HOH HOH HOH S . 639 639 . 32.149 65.837 27.215 1.00 43.62 1 .  
.  
ATOM 7193 O O . HOH HOH HOH S . 640 640 . 69.982 31.996 34.070 1.00 40.15 1 .  
.  
ATOM 7194 O O . HOH HOH HOH S . 641 641 . 49.394 52.769 42.533 1.00 50.95 1 .  
.  
ATOM 7195 O O . HOH HOH HOH S . 642 642 . 56.870 51.224 42.409 1.00 49.47 1 .  
.  
ATOM 7196 O O . HOH HOH HOH S . 643 643 . 29.846 23.689 39.132 1.00 46.89 1 .  
.  
ATOM 7197 O O . HOH HOH HOH S . 644 644 . 26.378 71.450 16.920 1.00 56.90 1 .  
.  
ATOM 7198 O O . HOH HOH HOH S . 645 645 . 25.198 67.349 27.144 1.00 45.56 1 .  
.  
ATOM 7199 O O . HOH HOH HOH S . 646 646 . 8.399 32.043 -3.445 1.00 47.26 1 .  
.  
ATOM 7200 O O . HOH HOH HOH S . 647 647 . 52.114 41.300 -10.660 1.00 48.74 1 .  
.  
ATOM 7201 O O . HOH HOH HOH S . 648 648 . 39.693 58.697 -25.463 1.00 43.74 1 .  
.  
ATOM 7202 O O . HOH HOH HOH S . 649 649 . 12.708 62.496 -13.596 1.00 54.52 1 .  
.  
ATOM 7203 O O . HOH HOH HOH S . 650 650 . 12.142 44.299 -11.006 1.00 46.88 1 .  
.  
ATOM 7204 O O . HOH HOH HOH S . 651 651 . 18.447 45.889 -17.729 1.00 37.94 1 .  
.  
ATOM 7205 O O . HOH HOH HOH S . 652 652 . 50.848 33.637 18.353 1.00 39.53 1 .  
.  
ATOM 7206 O O . HOH HOH HOH S . 653 653 . 53.204 32.542 17.629 1.00 60.65 1 .  
.  
ATOM 7207 O O . HOH HOH HOH S . 654 654 . 40.766 54.530 10.321 1.00 38.40 1 .  
.  
ATOM 7208 O O . HOH HOH HOH S . 655 655 . 45.624 27.791 -3.596 1.00 42.88 1 .  
.  
ATOM 7209 O O . HOH HOH HOH S . 656 656 . 35.855 40.726 47.237 1.00 42.10 1 .  
.  
ATOM 7210 O O . HOH HOH HOH S . 657 657 . 7.111 56.536 -2.658 1.00 50.73 1 .  
.  
ATOM 7211 O O . HOH HOH HOH S . 658 658 . 49.931 62.015 25.412 1.00 56.18 1 .  
.  
ATOM 7212 O O . HOH HOH HOH S . 659 659 . 17.271 34.043 37.011 1.00 35.31 1 .  
.  
ATOM 7213 O O . HOH HOH HOH S . 660 660 . 48.903 51.444 7.579 1.00 55.15 1 .  
.  
ATOM 7214 O O . HOH HOH HOH S . 661 661 . 29.343 15.403 6.838 1.00 46.73 1 .  
.  
ATOM 7215 O O . HOH HOH HOH S . 662 662 . 46.416 43.519 11.895 1.00 41.31 1 .  
.  
ATOM 7216 O O . HOH HOH HOH S . 663 663 . 28.269 40.378 -19.307 1.00 33.27 1 .  
.  
ATOM 7217 O O . HOH HOH HOH S . 664 664 . 48.131 63.733 9.720 1.00 52.14 1 .  
.  
ATOM 7218 O O . HOH HOH HOH S . 665 665 . 38.693 56.728 8.473 1.00 53.20 1 .  
.  
.



ATOM 7219 O O . HOH HOH HOH S . 666 666 . 29.534 62.872 -24.757 1.00 45.84 1 .  
.  
ATOM 7220 O O . HOH HOH HOH S . 667 667 . 53.249 55.451 14.149 1.00 42.48 1 .  
.  
ATOM 7221 O O . HOH HOH HOH S . 668 668 . 30.046 66.810 1.217 1.00 40.11 1 .  
.  
ATOM 7222 O O . HOH HOH HOH S . 669 669 . 20.072 67.349 -21.274 1.00 41.89 1 .  
.  
ATOM 7223 O O . HOH HOH HOH S . 670 670 . 30.433 60.518 11.357 1.00 45.59 1 .  
.  
ATOM 7224 O O . HOH HOH HOH S . 671 671 . 50.060 42.674 -14.044 1.00 39.10 1 .  
.  
ATOM 7225 O O . HOH HOH HOH S . 672 672 . 48.777 65.485 12.692 1.00 47.92 1 .  
.  
ATOM 7226 O O . HOH HOH HOH S . 673 673 . 26.003 23.285 1.229 1.00 55.56 1 .  
.  
ATOM 7227 O O . HOH HOH HOH S . 674 674 . 17.208 69.153 10.268 1.00 39.48 1 .  
.  
ATOM 7228 O O . HOH HOH HOH S . 675 675 . 38.928 14.031 7.289 1.00 50.09 1 .  
.  
ATOM 7229 O O . HOH HOH HOH S . 676 676 . 16.783 65.764 -16.007 1.00 55.51 1 .  
.  
ATOM 7230 O O . HOH HOH HOH S . 677 677 . 69.604 37.970 26.872 1.00 50.95 1 .  
.  
ATOM 7231 O O . HOH HOH HOH S . 678 678 . 18.852 9.779 26.770 1.00 49.15 1 .  
.  
ATOM 7232 O O . HOH HOH HOH S . 679 679 . 29.280 62.681 30.749 1.00 42.83 1 .  
.  
ATOM 7233 O O . HOH HOH HOH S . 680 680 . 51.258 38.885 6.570 1.00 44.30 1 .  
.  
ATOM 7234 O O . HOH HOH HOH S . 681 681 . 18.906 71.371 -13.338 1.00 45.66 1 .  
.  
ATOM 7235 O O . HOH HOH HOH S . 682 682 . 20.713 17.729 8.872 1.00 67.69 1 .  
.  
ATOM 7236 O O . HOH HOH HOH S . 683 683 . 21.629 69.169 20.663 1.00 52.94 1 .  
.  
ATOM 7237 O O . HOH HOH HOH S . 684 684 . 3.392 66.389 17.745 1.00 43.33 1 .  
.  
ATOM 7238 O O . HOH HOH HOH S . 685 685 . 53.352 64.461 -1.805 1.00 55.61 1 .  
.  
ATOM 7239 O O . HOH HOH HOH S . 686 686 . 12.056 16.706 24.440 1.00 48.64 1 .  
.  
ATOM 7240 O O . HOH HOH HOH S . 687 687 . 32.364 18.491 32.804 1.00 47.31 1 .  
.  
ATOM 7241 O O . HOH HOH HOH S . 688 688 . 40.298 29.812 -15.499 1.00 58.23 1 .  
.  
ATOM 7242 O O . HOH HOH HOH S . 689 689 . 16.998 13.380 31.138 1.00 42.56 1 .  
.  
ATOM 7243 O O . HOH HOH HOH S . 690 690 . 40.532 74.537 -1.129 1.00 69.25 1 .  
.  
ATOM 7244 O O . HOH HOH HOH S . 691 691 . 45.472 20.935 31.433 1.00 45.78 1 .  
.  
ATOM 7245 O O . HOH HOH HOH S . 692 692 . 42.204 69.145 0.629 1.00 57.83 1 .  
.  
ATOM 7246 O O . HOH HOH HOH S . 693 693 . 31.562 13.668 30.872 1.00 51.57 1 .  
.  
ATOM 7247 O O . HOH HOH HOH S . 694 694 . 1.157 40.044 12.242 1.00 60.76 1 .  
.  
ATOM 7248 O O . HOH HOH HOH S . 695 695 . 4.007 56.439 21.733 1.00 54.96 1 .  
.

ATOM 7249 O O . HOH HOH HOH S . 696 696 . 18.080 48.740 -22.140 1.00 41.44 1 .  
.  
ATOM 7250 O O . HOH HOH HOH S . 697 697 . 28.913 29.706 -11.900 1.00 53.65 1 .  
.  
ATOM 7251 O O . HOH HOH HOH S . 698 698 . 29.848 37.984 41.528 1.00 51.45 1 .  
.  
ATOM 7252 O O . HOH HOH HOH S . 699 699 . 5.514 29.261 8.117 1.00 46.50 1 .  
.  
ATOM 7253 O O . HOH HOH HOH S . 700 700 . 0.129 37.484 3.947 1.00 52.19 1 .  
.  
ATOM 7254 O O . HOH HOH HOH S . 701 701 . 3.052 37.117 -1.093 1.00 48.42 1 .  
.  
ATOM 7255 O O . HOH HOH HOH S . 702 702 . 10.639 43.234 -12.797 1.00 55.65 1 .  
.  
ATOM 7256 O O . HOH HOH HOH S . 703 703 . 8.036 57.122 23.874 1.00 54.13 1 .  
.  
ATOM 7257 O O . HOH HOH HOH S . 704 704 . 31.680 64.266 4.162 1.00 45.13 1 .  
.  
ATOM 7258 O O . HOH HOH HOH S . 705 705 . 47.925 21.453 35.974 1.00 44.26 1 .  
.  
ATOM 7259 O O . HOH HOH HOH S . 706 706 . 17.900 21.956 -3.837 1.00 43.93 1 .  
.  
ATOM 7260 O O . HOH HOH HOH S . 707 707 . 15.996 51.994 36.150 1.00 86.62 1 .  
.  
ATOM 7261 O O . HOH HOH HOH S . 708 708 . 55.898 42.499 -1.761 1.00 35.33 1 .  
.  
ATOM 7262 O O . HOH HOH HOH S . 709 709 . 37.583 65.726 -21.084 1.00 75.79 1 .  
.  
ATOM 7263 O O . HOH HOH HOH S . 710 710 . 50.636 66.862 19.651 1.00 52.53 1 .  
.  
ATOM 7264 O O . HOH HOH HOH S . 711 711 . 56.630 53.898 34.217 1.00 59.78 1 .  
.  
ATOM 7265 O O . HOH HOH HOH S . 712 712 . 16.791 32.021 17.444 1.00 47.53 1 .  
.  
ATOM 7266 O O . HOH HOH HOH S . 713 713 . 11.921 60.461 -11.490 1.00 51.65 1 .  
.  
ATOM 7267 O O . HOH HOH HOH S . 714 714 . 45.212 70.472 0.074 1.00 50.26 1 .  
.  
ATOM 7268 O O . HOH HOH HOH S . 715 715 . 12.588 52.245 -20.925 1.00 53.36 1 .  
.  
ATOM 7269 O O . HOH HOH HOH S . 716 716 . 20.796 45.972 44.535 1.00 48.86 1 .  
.  
ATOM 7270 O O . HOH HOH HOH S . 717 717 . 38.516 37.021 -15.611 1.00 52.76 1 .  
.  
ATOM 7271 O O . HOH HOH HOH S . 718 718 . 37.695 56.887 -26.972 1.00 51.47 1 .  
.  
ATOM 7272 O O . HOH HOH HOH S . 719 719 . 46.705 73.237 -12.425 1.00 48.48 1 .  
.  
ATOM 7273 O O . HOH HOH HOH S . 720 720 . -0.627 61.096 2.318 1.00 48.33 1 .  
.  
ATOM 7274 O O . HOH HOH HOH S . 721 721 . 8.606 49.309 -4.168 1.00 59.50 1 .  
.  
ATOM 7275 O O . HOH HOH HOH S . 722 722 . 15.939 19.332 5.811 1.00 45.51 1 .  
.  
ATOM 7276 O O . HOH HOH HOH S . 723 723 . 8.088 34.530 11.646 1.00 45.75 1 .  
.  
ATOM 7277 O O . HOH HOH HOH S . 724 724 . 55.316 58.338 -5.040 1.00 44.14 1 .  
.  
ATOM 7278 O O . HOH HOH HOH S . 725 725 . 60.664 54.029 21.284 1.00 48.93 1 .  
.  
.

ATOM 7279 O O . HOH HOH HOH S . 726 726 . 24.048 51.309 47.679 1.00 48.39 1 .  
.ATOM 7280 O O . HOH HOH HOH S . 727 727 . 40.223 62.142 -20.878 1.00 44.55 1 .  
.ATOM 7281 O O . HOH HOH HOH S . 728 728 . 13.587 70.805 7.575 1.00 49.54 1 .  
.ATOM 7282 O O . HOH HOH HOH S . 729 729 . 8.968 64.655 19.131 1.00 45.51 1 .  
.ATOM 7283 O O . HOH HOH HOH S . 730 730 . 49.564 31.100 18.895 1.00 58.65 1 .  
.ATOM 7284 O O . HOH HOH HOH S . 731 731 . 15.618 23.273 7.022 1.00 72.12 1 .  
.ATOM 7285 O O . HOH HOH HOH S . 732 732 . 37.587 60.592 16.003 1.00 45.65 1 .  
.ATOM 7286 O O . HOH HOH HOH S . 733 733 . 51.621 33.023 47.518 1.00 40.65 1 .  
.ATOM 7287 O O . HOH HOH HOH S . 734 734 . 61.518 29.537 26.686 1.00 55.65 1 .  
.ATOM 7288 O O . HOH HOH HOH S . 735 735 . 53.585 21.728 27.614 1.00 55.89 1 .  
.ATOM 7289 O O . HOH HOH HOH S . 736 736 . 8.039 44.749 24.497 1.00 53.93 1 .  
.ATOM 7290 O O . HOH HOH HOH S . 737 737 . 47.970 57.903 -21.828 1.00 69.07 1 .  
.ATOM 7291 O O . HOH HOH HOH S . 738 738 . 54.878 28.565 23.882 1.00 46.08 1 .  
.ATOM 7292 O O . HOH HOH HOH S . 739 739 . 44.594 43.972 -18.010 1.00 68.15 1 .  
.ATOM 7293 O O . HOH HOH HOH S . 740 740 . 7.935 38.772 20.548 1.00 44.36 1 .  
.ATOM 7294 O O . HOH HOH HOH S . 741 741 . 43.686 45.644 -20.925 1.00 56.27 1 .  
.ATOM 7295 O O . HOH HOH HOH S . 742 742 . 23.096 21.651 35.108 1.00 54.95 1 .  
.ATOM 7296 O O . HOH HOH HOH S . 743 743 . 60.647 34.747 34.841 1.00 36.10 1 .  
.ATOM 7297 O O . HOH HOH HOH S . 744 744 . 20.653 69.903 -8.602 1.00 43.33 1 .  
.ATOM 7298 O O . HOH HOH HOH S . 745 745 . 55.568 23.941 27.968 1.00 48.03 1 .  
.ATOM 7299 O O . HOH HOH HOH S . 746 746 . 57.007 32.310 43.753 1.00 44.48 1 .  
.ATOM 7300 O O . HOH HOH HOH S . 747 747 . 44.122 80.500 -11.325 1.00 55.73 1 .  
.ATOM 7301 O O . HOH HOH HOH S . 748 748 . 49.693 35.256 15.986 1.00 49.75 1 .  
.ATOM 7302 O O . HOH HOH HOH S . 749 749 . 15.718 39.496 21.478 1.00 48.67 1 .  
.ATOM 7303 O O . HOH HOH HOH S . 750 750 . 3.685 41.907 -3.904 1.00 52.52 1 .  
.ATOM 7304 O O . HOH HOH HOH S . 751 751 . 17.255 38.018 7.444 1.00 42.94 1 .  
.ATOM 7305 O O . HOH HOH HOH S . 752 752 . 7.811 26.555 25.650 1.00 60.23 1 .  
.ATOM 7306 O O . HOH HOH HOH S . 753 753 . 1.785 61.707 19.032 1.00 50.61 1 .  
.ATOM 7307 O O . HOH HOH HOH S . 754 754 . 44.526 34.642 48.914 1.00 64.15 1 .  
.ATOM 7308 O O . HOH HOH HOH S . 755 755 . 49.488 68.932 -14.943 1.00 50.71 1 .  
.



ATOM 7339 O O . HOH HOH HOH S . 786 786 . 49.980 66.780 -10.899 1.00 54.60 1 .  
.  
ATOM 7340 O O . HOH HOH HOH S . 787 787 . 23.607 64.659 28.290 1.00 58.55 1 .  
.  
ATOM 7341 O O . HOH HOH HOH S . 788 788 . 56.170 55.979 32.816 1.00 53.54 1 .  
.  
ATOM 7342 O O . HOH HOH HOH S . 789 789 . 57.552 27.840 38.118 1.00 42.88 1 .  
.  
ATOM 7343 O O . HOH HOH HOH S . 790 790 . 18.252 70.719 7.425 1.00 56.02 1 .  
.  
ATOM 7344 O O . HOH HOH HOH S . 791 791 . 28.722 31.618 -13.153 1.00 60.76 1 .  
.  
ATOM 7345 O O . HOH HOH HOH S . 792 792 . 35.674 36.823 48.652 1.00 56.46 1 .  
.  
ATOM 7346 O O . HOH HOH HOH S . 793 793 . 9.777 64.382 23.026 1.00 59.45 1 .  
.  
ATOM 7347 O O . HOH HOH HOH S . 794 794 . 22.030 23.766 36.482 1.00 45.66 1 .  
.  
ATOM 7348 O O . HOH HOH HOH S . 795 795 . 16.955 70.717 17.020 1.00 45.81 1 .  
.  
ATOM 7349 O O . HOH HOH HOH S . 796 796 . 15.051 8.515 23.256 1.00 90.28 1 .  
.  
ATOM 7350 O O . HOH HOH HOH S . 797 797 . 8.544 31.900 7.129 1.00 41.69 1 .  
.  
ATOM 7351 O O . HOH HOH HOH S . 798 798 . -1.613 48.025 -1.684 1.00 58.06 1 .  
.  
ATOM 7352 O O . HOH HOH HOH S . 799 799 . 31.248 38.681 48.239 1.00 53.25 1 .  
.  
ATOM 7353 O O . HOH HOH HOH S . 800 800 . 32.575 66.196 1.013 1.00 61.54 1 .  
.  
ATOM 7354 O O . HOH HOH HOH S . 801 801 . 47.889 29.437 6.991 1.00 72.91 1 .  
.  
ATOM 7355 O O . HOH HOH HOH S . 802 802 . 23.084 48.976 42.790 1.00 61.50 1 .  
.  
ATOM 7356 O O . HOH HOH HOH S . 803 803 . 54.315 58.084 40.021 1.00 76.44 1 .  
.  
ATOM 7357 O O . HOH HOH HOH S . 804 804 . 36.472 12.205 5.699 1.00 50.84 1 .  
.  
ATOM 7358 O O . HOH HOH HOH S . 805 805 . 10.102 34.388 34.970 1.00 50.11 1 .  
.  
ATOM 7359 O O . HOH HOH HOH S . 806 806 . 22.918 24.720 -7.993 1.00 49.35 1 .

.  
#  
loop\_  
\_atom\_site\_anisotrop.id  
\_atom\_site\_anisotrop.pdbx\_auth\_atom\_id  
\_atom\_site\_anisotrop.pdbx\_label\_atom\_id  
\_atom\_site\_anisotrop.pdbx\_label\_alt\_id  
\_atom\_site\_anisotrop.pdbx\_auth\_comp\_id  
\_atom\_site\_anisotrop.pdbx\_label\_comp\_id  
\_atom\_site\_anisotrop.pdbx\_orig\_comp\_id  
\_atom\_site\_anisotrop.pdbx\_auth\_asym\_id  
\_atom\_site\_anisotrop.pdbx\_label\_asym\_id  
\_atom\_site\_anisotrop.pdbx\_auth\_seq\_id  
\_atom\_site\_anisotrop.pdbx\_label\_seq\_id  
\_atom\_site\_anisotrop.pdbx\_PDB\_ins\_code  
\_atom\_site\_anisotrop.U[1][1]  
\_atom\_site\_anisotrop.U[2][2]  
\_atom\_site\_anisotrop.U[3][3]  
\_atom\_site\_anisotrop.U[1][2]

```

_atom_site_anisotrop.U[1][3]
_atom_site_anisotrop.U[2][3]
_atom_site_anisotrop.pdbx_PDB_model_num
_atom_site_anisotrop.type_symbol
1  N  N  . SER SER SER A A 1 1 . 0.3812 0.4235 0.4041 0.0061 -0.0013
0.0232 1 .
2  CA CA . SER SER SER A A 1 1 . 0.3672 0.3608 0.3771 -0.0229 -0.0129
0.0153 1 .
3  CB CB . SER SER SER A A 1 1 . 0.3689 0.4227 0.4138 -0.0265 -0.0182
0.0026 1 .
4  OG OG . SER SER SER A A 1 1 . 0.3016 0.3202 0.4240 -0.0874 -0.0655 -
0.0180 1 .
5  C  C  . SER SER SER A A 1 1 . 0.3150 0.3446 0.3620 -0.0047 0.0133
0.0127 1 .
6  O  O  . SER SER SER A A 1 1 . 0.2987 0.3874 0.3813 -0.0016 0.0410
0.0303 1 .
7  N  N  . ILE ILE ILE A A 2 2 . 0.3101 0.2865 0.3076 -0.0155 0.0137
0.0169 1 .
8  CA CA . ILE ILE ILE A A 2 2 . 0.2513 0.2345 0.2821 -0.0065 0.0090
0.0051 1 .
9  CB CB . ILE ILE ILE A A 2 2 . 0.2385 0.2225 0.2389 0.0007 -0.0004
0.0129 1 .
10 CG1 CG1 . ILE ILE ILE A A 2 2 . 0.2050 0.2234 0.2863 -0.0015 -0.0278
0.0071 1 .
11 CD CD . ILE ILE ILE A A 2 2 . 0.2180 0.2488 0.2399 0.0236 -0.0871
0.0593 1 .
12 CG2 CG2 . ILE ILE ILE A A 2 2 . 0.2395 0.1958 0.2471 -0.0062 0.0155
0.0269 1 .
13 C  C  . ILE ILE ILE A A 2 2 . 0.2349 0.2349 0.2755 -0.0088 0.0093
0.0214 1 .
14 O  O  . ILE ILE ILE A A 2 2 . 0.2639 0.2425 0.3241 -0.0132 0.0100
0.0161 1 .
15 N  N  . GLU GLU GLU A A 3 3 . 0.2250 0.2214 0.2622 -0.0112 -0.0226
0.0168 1 .
16 CA CA . GLU GLU GLU A A 3 3 . 0.2298 0.2261 0.2646 -0.0170 -0.0016
0.0101 1 .
17 CB CB . GLU GLU GLU A A 3 3 . 0.2406 0.2412 0.2981 0.0001 -0.0013
0.0053 1 .
18 CG CG . GLU GLU GLU A A 3 3 . 0.2113 0.3360 0.4158 -0.0187 0.0033
0.0128 1 .
19 CD CD . GLU GLU GLU A A 3 3 . 0.4105 0.4734 0.5655 0.0365 0.0236
0.0227 1 .
20 OE1 OE1 . GLU GLU GLU A A 3 3 . 0.4574 0.5176 0.5694 0.0576 0.0655
0.0412 1 .
21 OE2 OE2 . GLU GLU GLU A A 3 3 . 0.4053 0.5728 0.6309 0.0258 0.0481 -
0.0247 1 .
22 C  C  . GLU GLU GLU A A 3 3 . 0.2335 0.2124 0.2659 -0.0156 -0.0100 -
0.0079 1 .
23 O  O  . GLU GLU GLU A A 3 3 . 0.2486 0.2156 0.2961 -0.0109 -0.0154 -
0.0189 1 .
24 N  N  . LYS LYS LYS A A 4 4 . 0.2005 0.1765 0.2412 -0.0377 -0.0011
0.0120 1 .
25 CA CA . LYS LYS LYS A A 4 4 . 0.1965 0.1809 0.2050 -0.0264 -0.0250 -
0.0006 1 .
26 CB CB . LYS LYS LYS A A 4 4 . 0.2147 0.1948 0.2031 -0.0109 -0.0173
0.0227 1 .
27 CG CG . LYS LYS LYS A A 4 4 . 0.2728 0.2536 0.2013 -0.0478 -0.0163
0.0421 1 .
28 CD CD . LYS LYS LYS A A 4 4 . 0.3327 0.3818 0.2190 -0.0419 -0.0679
0.0366 1 .

```















































































|        |     |     |                             |        |        |        |         |         |   |
|--------|-----|-----|-----------------------------|--------|--------|--------|---------|---------|---|
| 1049   | CB  | CB  | . ILE ILE ILE A A 143 143 . | 0.2559 | 0.2907 | 0.1895 | -0.0238 | -0.0183 |   |
| 0.0075 | 1   | .   |                             |        |        |        |         |         |   |
| 1050   | CG1 | CG1 | . ILE ILE ILE A A 143 143 . | 0.3515 | 0.2295 | 0.2706 | -0.0171 | 0.0011  |   |
| 0.0637 | 1   | .   |                             |        |        |        |         |         |   |
| 1051   | CD  | CD  | . ILE ILE ILE A A 143 143 . | 0.3937 | 0.3544 | 0.3450 | 0.0271  | 0.0039  | - |
| 0.0392 | 1   | .   |                             |        |        |        |         |         |   |
| 1052   | CG2 | CG2 | . ILE ILE ILE A A 143 143 . | 0.2830 | 0.3032 | 0.2217 | -0.0276 | -0.0036 |   |
| 0.0111 | 1   | .   |                             |        |        |        |         |         |   |
| 1053   | C   | C   | . ILE ILE ILE A A 143 143 . | 0.2210 | 0.1953 | 0.1720 | -0.0023 | 0.0142  |   |
| 0.0189 | 1   | .   |                             |        |        |        |         |         |   |
| 1054   | O   | O   | . ILE ILE ILE A A 143 143 . | 0.2019 | 0.2055 | 0.1763 | 0.0027  | -0.0002 |   |
| 0.0451 | 1   | .   |                             |        |        |        |         |         |   |
| 1055   | N   | N   | . LEU LEU LEU A A 144 144 . | 0.1732 | 0.1722 | 0.1218 | -0.0234 | 0.0177  |   |
| 0.0200 | 1   | .   |                             |        |        |        |         |         |   |
| 1056   | CA  | CA  | . LEU LEU LEU A A 144 144 . | 0.1436 | 0.1613 | 0.1191 | -0.0107 | 0.0134  | - |
| 0.0001 | 1   | .   |                             |        |        |        |         |         |   |
| 1057   | CB  | CB  | . LEU LEU LEU A A 144 144 . | 0.1613 | 0.1301 | 0.1393 | 0.0002  | -0.0239 |   |
| 0.0069 | 1   | .   |                             |        |        |        |         |         |   |
| 1058   | CG  | CG  | . LEU LEU LEU A A 144 144 . | 0.1526 | 0.2391 | 0.1250 | -0.0019 | 0.0086  | - |
| 0.0125 | 1   | .   |                             |        |        |        |         |         |   |
| 1059   | CD1 | CD1 | . LEU LEU LEU A A 144 144 . | 0.2364 | 0.2152 | 0.1453 | 0.0522  | 0.0035  |   |
| 0.0065 | 1   | .   |                             |        |        |        |         |         |   |
| 1060   | CD2 | CD2 | . LEU LEU LEU A A 144 144 . | 0.2148 | 0.2602 | 0.1759 | -0.0631 | -0.0417 |   |
| 0.0221 | 1   | .   |                             |        |        |        |         |         |   |
| 1061   | C   | C   | . LEU LEU LEU A A 144 144 . | 0.1604 | 0.1646 | 0.1399 | -0.0141 | 0.0117  | - |
| 0.0123 | 1   | .   |                             |        |        |        |         |         |   |
| 1062   | O   | O   | . LEU LEU LEU A A 144 144 . | 0.1676 | 0.1890 | 0.1367 | -0.0258 | 0.0289  | - |
| 0.0401 | 1   | .   |                             |        |        |        |         |         |   |
| 1063   | N   | N   | . PRO PRO PRO A A 145 145 . | 0.1701 | 0.1663 | 0.1169 | -0.0056 | 0.0063  | - |
| 0.0194 | 1   | .   |                             |        |        |        |         |         |   |
| 1064   | CA  | CA  | . PRO PRO PRO A A 145 145 . | 0.1721 | 0.1579 | 0.1196 | -0.0124 | 0.0022  | - |
| 0.0298 | 1   | .   |                             |        |        |        |         |         |   |
| 1065   | CB  | CB  | . PRO PRO PRO A A 145 145 . | 0.2017 | 0.1510 | 0.0727 | 0.0028  | -0.0268 | - |
| 0.0597 | 1   | .   |                             |        |        |        |         |         |   |
| 1066   | CG  | CG  | . PRO PRO PRO A A 145 145 . | 0.1220 | 0.1560 | 0.1133 | -0.0265 | -0.0220 | - |
| 0.0135 | 1   | .   |                             |        |        |        |         |         |   |
| 1067   | CD  | CD  | . PRO PRO PRO A A 145 145 . | 0.1495 | 0.1698 | 0.1040 | -0.0280 | 0.0063  | - |
| 0.0309 | 1   | .   |                             |        |        |        |         |         |   |
| 1068   | C   | C   | . PRO PRO PRO A A 145 145 . | 0.1735 | 0.1602 | 0.1058 | -0.0140 | 0.0073  | - |
| 0.0252 | 1   | .   |                             |        |        |        |         |         |   |
| 1069   | O   | O   | . PRO PRO PRO A A 145 145 . | 0.1733 | 0.1435 | 0.1126 | -0.0196 | -0.0021 | - |
| 0.0285 | 1   | .   |                             |        |        |        |         |         |   |
| 1070   | N   | N   | . VAL VAL VAL A A 146 146 . | 0.1741 | 0.1643 | 0.0861 | -0.0542 | 0.0080  | - |
| 0.0274 | 1   | .   |                             |        |        |        |         |         |   |
| 1071   | CA  | CA  | . VAL VAL VAL A A 146 146 . | 0.1768 | 0.1739 | 0.1172 | -0.0319 | 0.0139  | - |
| 0.0239 | 1   | .   |                             |        |        |        |         |         |   |
| 1072   | CB  | CB  | . VAL VAL VAL A A 146 146 . | 0.1860 | 0.2046 | 0.1075 | -0.0358 | 0.0077  | - |
| 0.0140 | 1   | .   |                             |        |        |        |         |         |   |
| 1073   | CG1 | CG1 | . VAL VAL VAL A A 146 146 . | 0.1796 | 0.1950 | 0.1916 | -0.0646 | -0.0131 | - |
| 0.0461 | 1   | .   |                             |        |        |        |         |         |   |
| 1074   | CG2 | CG2 | . VAL VAL VAL A A 146 146 . | 0.2194 | 0.1893 | 0.1268 | -0.0063 | 0.0283  | - |
| 0.0640 | 1   | .   |                             |        |        |        |         |         |   |
| 1075   | C   | C   | . VAL VAL VAL A A 146 146 . | 0.1881 | 0.1579 | 0.1128 | -0.0065 | 0.0054  | - |
| 0.0179 | 1   | .   |                             |        |        |        |         |         |   |
| 1076   | O   | O   | . VAL VAL VAL A A 146 146 . | 0.2243 | 0.1912 | 0.0912 | -0.0109 | 0.0086  | - |
| 0.0438 | 1   | .   |                             |        |        |        |         |         |   |
| 1077   | N   | N   | . PRO PRO PRO A A 147 147 . | 0.1929 | 0.1537 | 0.1228 | -0.0050 | 0.0183  | - |
| 0.0205 | 1   | .   |                             |        |        |        |         |         |   |
| 1078   | CA  | CA  | . PRO PRO PRO A A 147 147 . | 0.1637 | 0.1765 | 0.1398 | -0.0165 | 0.0354  | - |
| 0.0137 | 1   | .   |                             |        |        |        |         |         |   |





|        |     |     |                             |        |        |        |         |         |   |
|--------|-----|-----|-----------------------------|--------|--------|--------|---------|---------|---|
| 1139   | N   | N   | . SER SER SER A A 156 156 . | 0.2837 | 0.2979 | 0.2956 | -0.0188 | 0.0113  | - |
| 0.0221 | 1   | .   |                             |        |        |        |         |         |   |
| 1140   | CA  | CA  | . SER SER SER A A 156 156 . | 0.3027 | 0.3222 | 0.3261 | 0.0094  | -0.0016 | - |
| 0.0300 | 1   | .   |                             |        |        |        |         |         |   |
| 1141   | CB  | CB  | . SER SER SER A A 156 156 . | 0.2948 | 0.3056 | 0.3576 | 0.0266  | 0.0025  | - |
| 0.0112 | 1   | .   |                             |        |        |        |         |         |   |
| 1142   | OG  | OG  | . SER SER SER A A 156 156 . | 0.2323 | 0.4296 | 0.3704 | -0.0082 | -0.0199 | - |
| 0.0324 | 1   | .   |                             |        |        |        |         |         |   |
| 1143   | C   | C   | . SER SER SER A A 156 156 . | 0.2838 | 0.2978 | 0.2971 | 0.0045  | 0.0059  | - |
| 0.0341 | 1   | .   |                             |        |        |        |         |         |   |
| 1144   | O   | O   | . SER SER SER A A 156 156 . | 0.3164 | 0.3393 | 0.2901 | -0.0017 | -0.0163 | - |
| 0.0649 | 1   | .   |                             |        |        |        |         |         |   |
| 1145   | N   | N   | . HIS HIS HIS A A 157 157 . | 0.2554 | 0.2764 | 0.2763 | 0.0033  | 0.0308  | - |
| 0.0205 | 1   | .   |                             |        |        |        |         |         |   |
| 1146   | CA  | CA  | . HIS HIS HIS A A 157 157 . | 0.2473 | 0.2636 | 0.2569 | -0.0033 | 0.0253  | - |
| 0.0178 | 1   | .   |                             |        |        |        |         |         |   |
| 1147   | CB  | CB  | . HIS HIS HIS A A 157 157 . | 0.2563 | 0.2755 | 0.2680 | -0.0061 | 0.0432  | - |
| 0.0173 | 1   | .   |                             |        |        |        |         |         |   |
| 1148   | CG  | CG  | . HIS HIS HIS A A 157 157 . | 0.2037 | 0.2651 | 0.2749 | -0.0448 | 0.0234  | - |
| 0.0170 | 1   | .   |                             |        |        |        |         |         |   |
| 1149   | ND1 | ND1 | . HIS HIS HIS A A 157 157 . | 0.2681 | 0.2687 | 0.2599 | -0.0472 | 0.0252  | - |
| 0.0106 | 1   | .   |                             |        |        |        |         |         |   |
| 1150   | CE1 | CE1 | . HIS HIS HIS A A 157 157 . | 0.2688 | 0.2640 | 0.3486 | -0.0668 | 0.0340  | - |
| 0.0033 | 1   | .   |                             |        |        |        |         |         |   |
| 1151   | NE2 | NE2 | . HIS HIS HIS A A 157 157 . | 0.2257 | 0.2661 | 0.3008 | -0.0828 | 0.0068  | - |
| 0.0254 | 1   | .   |                             |        |        |        |         |         |   |
| 1152   | CD2 | CD2 | . HIS HIS HIS A A 157 157 . | 0.2028 | 0.2889 | 0.3501 | -0.0722 | 0.0235  | - |
| 0.0059 | 1   | .   |                             |        |        |        |         |         |   |
| 1153   | C   | C   | . HIS HIS HIS A A 157 157 . | 0.2394 | 0.2949 | 0.2413 | -0.0133 | 0.0319  | - |
| 0.0032 | 1   | .   |                             |        |        |        |         |         |   |
| 1154   | O   | O   | . HIS HIS HIS A A 157 157 . | 0.1994 | 0.2586 | 0.2421 | -0.0151 | 0.0276  | - |
| 0.0055 | 1   | .   |                             |        |        |        |         |         |   |
| 1155   | N   | N   | . ALA ALA ALA A A 158 158 . | 0.2448 | 0.2864 | 0.2556 | -0.0325 | -0.0044 | - |
| 0.0079 | 1   | .   |                             |        |        |        |         |         |   |
| 1156   | CA  | CA  | . ALA ALA ALA A A 158 158 . | 0.2470 | 0.2904 | 0.2678 | -0.0361 | 0.0339  | - |
| 0.0203 | 1   | .   |                             |        |        |        |         |         |   |
| 1157   | CB  | CB  | . ALA ALA ALA A A 158 158 . | 0.2703 | 0.2681 | 0.2965 | -0.0122 | 0.0232  | - |
| 0.0010 | 1   | .   |                             |        |        |        |         |         |   |
| 1158   | C   | C   | . ALA ALA ALA A A 158 158 . | 0.2393 | 0.2946 | 0.2745 | -0.0212 | 0.0308  | - |
| 0.0299 | 1   | .   |                             |        |        |        |         |         |   |
| 1159   | O   | O   | . ALA ALA ALA A A 158 158 . | 0.2400 | 0.3407 | 0.2953 | -0.0244 | 0.0552  | - |
| 0.0472 | 1   | .   |                             |        |        |        |         |         |   |
| 1160   | N   | N   | . GLY GLY GLY A A 159 159 . | 0.2559 | 0.3132 | 0.2985 | -0.0394 | 0.0454  | - |
| 0.0402 | 1   | .   |                             |        |        |        |         |         |   |
| 1161   | CA  | CA  | . GLY GLY GLY A A 159 159 . | 0.2987 | 0.3565 | 0.3207 | -0.0601 | 0.0471  | - |
| 0.0303 | 1   | .   |                             |        |        |        |         |         |   |
| 1162   | C   | C   | . GLY GLY GLY A A 159 159 . | 0.3267 | 0.3496 | 0.3310 | -0.0519 | 0.0304  | - |
| 0.0169 | 1   | .   |                             |        |        |        |         |         |   |
| 1163   | O   | O   | . GLY GLY GLY A A 159 159 . | 0.3497 | 0.4119 | 0.3920 | -0.0357 | 0.0321  | - |
| 0.0261 | 1   | .   |                             |        |        |        |         |         |   |
| 1164   | N   | N   | . ASN ASN ASN A A 160 160 . | 0.3074 | 0.3728 | 0.3610 | -0.0658 | 0.0294  | - |
| 0.0315 | 1   | .   |                             |        |        |        |         |         |   |
| 1165   | CA  | CA  | . ASN ASN ASN A A 160 160 . | 0.2967 | 0.3460 | 0.3321 | -0.0564 | 0.0271  | - |
| 0.0392 | 1   | .   |                             |        |        |        |         |         |   |
| 1166   | CB  | CB  | . ASN ASN ASN A A 160 160 . | 0.2767 | 0.3325 | 0.3143 | -0.0441 | 0.0326  | - |
| 0.0537 | 1   | .   |                             |        |        |        |         |         |   |
| 1167   | CG  | CG  | . ASN ASN ASN A A 160 160 . | 0.3017 | 0.3045 | 0.3701 | -0.0477 | 0.0320  | - |
| 0.0482 | 1   | .   |                             |        |        |        |         |         |   |
| 1168   | OD1 | OD1 | . ASN ASN ASN A A 160 160 . | 0.2195 | 0.3064 | 0.2808 | -0.0460 | 0.0228  | - |
| 0.0355 | 1   | .   |                             |        |        |        |         |         |   |











|        |     |     |                             |        |        |        |         |         |   |
|--------|-----|-----|-----------------------------|--------|--------|--------|---------|---------|---|
| 1289   | C   | C   | . SER SER SER A A 176 176 . | 0.1971 | 0.2120 | 0.1782 | -0.0039 | 0.0316  | - |
| 0.0287 | 1   | .   |                             |        |        |        |         |         |   |
| 1290   | O   | O   | . SER SER SER A A 176 176 . | 0.2136 | 0.1996 | 0.1442 | -0.0101 | 0.0255  | - |
| 0.0092 | 1   | .   |                             |        |        |        |         |         |   |
| 1291   | N   | N   | . PHE PHE PHE A A 177 177 . | 0.1997 | 0.1791 | 0.1643 | 0.0005  | 0.0574  | - |
| 0.0128 | 1   | .   |                             |        |        |        |         |         |   |
| 1292   | CA  | CA  | . PHE PHE PHE A A 177 177 . | 0.2049 | 0.1286 | 0.1310 | 0.0099  | 0.0246  | - |
| 0.0116 | 1   | .   |                             |        |        |        |         |         |   |
| 1293   | CB  | CB  | . PHE PHE PHE A A 177 177 . | 0.1905 | 0.1418 | 0.1407 | -0.0024 | 0.0290  | - |
| 0.0236 | 1   | .   |                             |        |        |        |         |         |   |
| 1294   | CG  | CG  | . PHE PHE PHE A A 177 177 . | 0.1385 | 0.1302 | 0.1192 | -0.0072 | 0.0334  | - |
| 0.0077 | 1   | .   |                             |        |        |        |         |         |   |
| 1295   | CD1 | CD1 | . PHE PHE PHE A A 177 177 . | 0.1167 | 0.1232 | 0.1300 | 0.0006  | 0.0261  | - |
| 0.0092 | 1   | .   |                             |        |        |        |         |         |   |
| 1296   | CE1 | CE1 | . PHE PHE PHE A A 177 177 . | 0.2040 | 0.0953 | 0.1349 | -0.0121 | 0.0251  | - |
| 0.0335 | 1   | .   |                             |        |        |        |         |         |   |
| 1297   | CZ  | CZ  | . PHE PHE PHE A A 177 177 . | 0.2205 | 0.1753 | 0.1304 | -0.0220 | 0.0150  | - |
| 0.0334 | 1   | .   |                             |        |        |        |         |         |   |
| 1298   | CE2 | CE2 | . PHE PHE PHE A A 177 177 . | 0.2159 | 0.1573 | 0.1786 | -0.0191 | 0.0432  | - |
| 0.0256 | 1   | .   |                             |        |        |        |         |         |   |
| 1299   | CD2 | CD2 | . PHE PHE PHE A A 177 177 . | 0.1758 | 0.1019 | 0.1420 | -0.0181 | 0.0119  | - |
| 0.0131 | 1   | .   |                             |        |        |        |         |         |   |
| 1300   | C   | C   | . PHE PHE PHE A A 177 177 . | 0.1785 | 0.1685 | 0.1443 | 0.0023  | 0.0030  | - |
| 0.0175 | 1   | .   |                             |        |        |        |         |         |   |
| 1301   | O   | O   | . PHE PHE PHE A A 177 177 . | 0.2008 | 0.1660 | 0.1444 | -0.0198 | 0.0080  | - |
| 0.0046 | 1   | .   |                             |        |        |        |         |         |   |
| 1302   | N   | N   | . ARG ARG ARG A A 178 178 . | 0.2060 | 0.1794 | 0.1645 | -0.0063 | -0.0066 | - |
| 0.0199 | 1   | .   |                             |        |        |        |         |         |   |
| 1303   | CA  | CA  | . ARG ARG ARG A A 178 178 . | 0.2106 | 0.1837 | 0.1561 | -0.0095 | 0.0009  | - |
| 0.0154 | 1   | .   |                             |        |        |        |         |         |   |
| 1304   | CB  | CB  | . ARG ARG ARG A A 178 178 . | 0.2125 | 0.2097 | 0.1829 | -0.0236 | -0.0196 | - |
| 0.0617 | 1   | .   |                             |        |        |        |         |         |   |
| 1305   | CG  | CG  | . ARG ARG ARG A A 178 178 . | 0.3406 | 0.3296 | 0.2954 | -0.0338 | 0.0045  | - |
| 0.0639 | 1   | .   |                             |        |        |        |         |         |   |
| 1306   | CD  | CD  | . ARG ARG ARG A A 178 178 . | 0.4637 | 0.3985 | 0.2899 | 0.0426  | 0.0365  | - |
| 0.0627 | 1   | .   |                             |        |        |        |         |         |   |
| 1307   | NE  | NE  | . ARG ARG ARG A A 178 178 . | 0.4042 | 0.5294 | 0.4854 | 0.0630  | 0.0133  | - |
| 0.0490 | 1   | .   |                             |        |        |        |         |         |   |
| 1308   | CZ  | CZ  | . ARG ARG ARG A A 178 178 . | 0.5077 | 0.5574 | 0.5002 | 0.0872  | 0.0063  | - |
| 0.0649 | 1   | .   |                             |        |        |        |         |         |   |
| 1309   | NH1 | NH1 | . ARG ARG ARG A A 178 178 . | 0.6421 | 0.5765 | 0.5539 | 0.0908  | -0.0463 | - |
| 0.0559 | 1   | .   |                             |        |        |        |         |         |   |
| 1310   | NH2 | NH2 | . ARG ARG ARG A A 178 178 . | 0.3338 | 0.5382 | 0.4953 | 0.0848  | 0.0921  | - |
| 0.1083 | 1   | .   |                             |        |        |        |         |         |   |
| 1311   | C   | C   | . ARG ARG ARG A A 178 178 . | 0.1968 | 0.1872 | 0.1437 | -0.0117 | 0.0099  | - |
| 0.0317 | 1   | .   |                             |        |        |        |         |         |   |
| 1312   | O   | O   | . ARG ARG ARG A A 178 178 . | 0.2204 | 0.1740 | 0.1339 | -0.0082 | 0.0201  | - |
| 0.0297 | 1   | .   |                             |        |        |        |         |         |   |
| 1313   | N   | N   | . ASP ASP ASP A A 179 179 . | 0.2070 | 0.1868 | 0.1526 | -0.0017 | 0.0148  | - |
| 0.0497 | 1   | .   |                             |        |        |        |         |         |   |
| 1314   | CA  | CA  | . ASP ASP ASP A A 179 179 . | 0.2254 | 0.2064 | 0.1616 | -0.0062 | 0.0197  | - |
| 0.0597 | 1   | .   |                             |        |        |        |         |         |   |
| 1315   | CB  | CB  | . ASP ASP ASP A A 179 179 . | 0.2589 | 0.2035 | 0.1725 | -0.0193 | 0.0081  | - |
| 0.0887 | 1   | .   |                             |        |        |        |         |         |   |
| 1316   | CG  | CG  | . ASP ASP ASP A A 179 179 . | 0.2822 | 0.2152 | 0.2309 | -0.0035 | 0.0181  | - |
| 0.0474 | 1   | .   |                             |        |        |        |         |         |   |
| 1317   | OD1 | OD1 | . ASP ASP ASP A A 179 179 . | 0.3555 | 0.2449 | 0.2775 | 0.0120  | -0.0093 | - |
| 0.0370 | 1   | .   |                             |        |        |        |         |         |   |
| 1318   | OD2 | OD2 | . ASP ASP ASP A A 179 179 . | 0.3389 | 0.2390 | 0.2399 | 0.0107  | 0.0627  | - |
| 0.0600 | 1   | .   |                             |        |        |        |         |         |   |

|        |     |     |                             |        |        |        |         |         |   |
|--------|-----|-----|-----------------------------|--------|--------|--------|---------|---------|---|
| 1319   | C   | C   | . ASP ASP ASP A A 179 179 . | 0.2250 | 0.1944 | 0.1532 | -0.0101 | 0.0109  | - |
| 0.0457 | 1   | .   |                             |        |        |        |         |         |   |
| 1320   | O   | O   | . ASP ASP ASP A A 179 179 . | 0.2153 | 0.1618 | 0.1449 | -0.0142 | 0.0151  | - |
| 0.0368 | 1   | .   |                             |        |        |        |         |         |   |
| 1321   | N   | N   | . ALA ALA ALA A A 180 180 . | 0.2084 | 0.1600 | 0.1324 | -0.0113 | 0.0097  | - |
| 0.0459 | 1   | .   |                             |        |        |        |         |         |   |
| 1322   | CA  | CA  | . ALA ALA ALA A A 180 180 . | 0.1951 | 0.1820 | 0.1014 | -0.0101 | 0.0089  | - |
| 0.0365 | 1   | .   |                             |        |        |        |         |         |   |
| 1323   | CB  | CB  | . ALA ALA ALA A A 180 180 . | 0.1944 | 0.1868 | 0.1339 | -0.0148 | 0.0164  | - |
| 0.0303 | 1   | .   |                             |        |        |        |         |         |   |
| 1324   | C   | C   | . ALA ALA ALA A A 180 180 . | 0.1832 | 0.1761 | 0.1261 | -0.0078 | 0.0169  | - |
| 0.0092 | 1   | .   |                             |        |        |        |         |         |   |
| 1325   | O   | O   | . ALA ALA ALA A A 180 180 . | 0.2090 | 0.1758 | 0.1325 | -0.0148 | 0.0315  | - |
| 0.0464 | 1   | .   |                             |        |        |        |         |         |   |
| 1326   | N   | N   | . MET MET MET A A 181 181 . | 0.1852 | 0.1524 | 0.1271 | -0.0199 | 0.0107  | - |
| 0.0188 | 1   | .   |                             |        |        |        |         |         |   |
| 1327   | CA  | CA  | . MET MET MET A A 181 181 . | 0.1959 | 0.1543 | 0.1195 | -0.0283 | -0.0073 | - |
| 0.0185 | 1   | .   |                             |        |        |        |         |         |   |
| 1328   | CB  | CB  | . MET MET MET A A 181 181 . | 0.1667 | 0.1459 | 0.1380 | -0.0389 | -0.0174 | - |
| 0.0137 | 1   | .   |                             |        |        |        |         |         |   |
| 1329   | CG  | CG  | . MET MET MET A A 181 181 . | 0.1922 | 0.1323 | 0.1678 | -0.0175 | 0.0282  | - |
| 0.0253 | 1   | .   |                             |        |        |        |         |         |   |
| 1330   | SD  | SD  | . MET MET MET A A 181 181 . | 0.2164 | 0.1758 | 0.1760 | -0.0292 | 0.0038  | - |
| 0.0371 | 1   | .   |                             |        |        |        |         |         |   |
| 1331   | CE  | CE  | . MET MET MET A A 181 181 . | 0.2566 | 0.1616 | 0.1337 | 0.0058  | -0.0298 | - |
| 0.0029 | 1   | .   |                             |        |        |        |         |         |   |
| 1332   | C   | C   | . MET MET MET A A 181 181 . | 0.1819 | 0.1675 | 0.1402 | -0.0156 | 0.0005  | - |
| 0.0124 | 1   | .   |                             |        |        |        |         |         |   |
| 1333   | O   | O   | . MET MET MET A A 181 181 . | 0.1948 | 0.1843 | 0.1407 | -0.0429 | 0.0353  | - |
| 0.0268 | 1   | .   |                             |        |        |        |         |         |   |
| 1334   | N   | N   | . ARG ARG ARG A A 182 182 . | 0.2061 | 0.1379 | 0.1222 | -0.0077 | 0.0016  | - |
| 0.0003 | 1   | .   |                             |        |        |        |         |         |   |
| 1335   | CA  | CA  | . ARG ARG ARG A A 182 182 . | 0.1957 | 0.1532 | 0.1600 | -0.0146 | 0.0130  | - |
| 0.0158 | 1   | .   |                             |        |        |        |         |         |   |
| 1336   | CB  | CB  | . ARG ARG ARG A A 182 182 . | 0.2171 | 0.1521 | 0.1858 | -0.0032 | 0.0204  | - |
| 0.0078 | 1   | .   |                             |        |        |        |         |         |   |
| 1337   | CG  | CG  | . ARG ARG ARG A A 182 182 . | 0.2711 | 0.1329 | 0.1807 | -0.0046 | 0.0399  | - |
| 0.0161 | 1   | .   |                             |        |        |        |         |         |   |
| 1338   | CD  | CD  | . ARG ARG ARG A A 182 182 . | 0.3499 | 0.1052 | 0.3362 | 0.0244  | 0.0675  | - |
| 0.0415 | 1   | .   |                             |        |        |        |         |         |   |
| 1339   | NE  | NE  | . ARG ARG ARG A A 182 182 . | 0.4003 | 0.2579 | 0.4178 | -0.0229 | 0.0305  | - |
| 0.0562 | 1   | .   |                             |        |        |        |         |         |   |
| 1340   | CZ  | CZ  | . ARG ARG ARG A A 182 182 . | 0.3883 | 0.3273 | 0.3924 | -0.0072 | 0.0127  | - |
| 0.0591 | 1   | .   |                             |        |        |        |         |         |   |
| 1341   | NH1 | NH1 | . ARG ARG ARG A A 182 182 . | 0.4815 | 0.2757 | 0.3166 | -0.0115 | -0.0101 | - |
| 0.1151 | 1   | .   |                             |        |        |        |         |         |   |
| 1342   | NH2 | NH2 | . ARG ARG ARG A A 182 182 . | 0.3673 | 0.3479 | 0.3147 | 0.0453  | 0.0254  | - |
| 0.0552 | 1   | .   |                             |        |        |        |         |         |   |
| 1343   | C   | C   | . ARG ARG ARG A A 182 182 . | 0.2033 | 0.1745 | 0.1442 | -0.0085 | 0.0309  | - |
| 0.0106 | 1   | .   |                             |        |        |        |         |         |   |
| 1344   | O   | O   | . ARG ARG ARG A A 182 182 . | 0.1963 | 0.1990 | 0.1770 | -0.0393 | 0.0105  | - |
| 0.0427 | 1   | .   |                             |        |        |        |         |         |   |
| 1345   | N   | N   | . LEU LEU LEU A A 183 183 . | 0.2060 | 0.1919 | 0.1634 | -0.0094 | -0.0083 | - |
| 0.0223 | 1   | .   |                             |        |        |        |         |         |   |
| 1346   | CA  | CA  | . LEU LEU LEU A A 183 183 . | 0.2265 | 0.1994 | 0.1725 | -0.0151 | 0.0020  | - |
| 0.0141 | 1   | .   |                             |        |        |        |         |         |   |
| 1347   | CB  | CB  | . LEU LEU LEU A A 183 183 . | 0.2693 | 0.2045 | 0.1389 | -0.0297 | -0.0080 | - |
| 0.0517 | 1   | .   |                             |        |        |        |         |         |   |
| 1348   | CG  | CG  | . LEU LEU LEU A A 183 183 . | 0.2564 | 0.1725 | 0.1961 | 0.0320  | 0.0041  | - |
| 0.0347 | 1   | .   |                             |        |        |        |         |         |   |

|        |     |     |                             |        |        |        |         |         |   |
|--------|-----|-----|-----------------------------|--------|--------|--------|---------|---------|---|
| 1349   | CD1 | CD1 | . LEU LEU LEU A A 183 183 . | 0.2446 | 0.2407 | 0.2240 | 0.0308  | -0.0033 | - |
| 0.0763 | 1   | .   |                             |        |        |        |         |         |   |
| 1350   | CD2 | CD2 | . LEU LEU LEU A A 183 183 . | 0.3017 | 0.1980 | 0.1642 | -0.0077 | -0.0150 | - |
| 0.0746 | 1   | .   |                             |        |        |        |         |         |   |
| 1351   | C   | C   | . LEU LEU LEU A A 183 183 . | 0.2160 | 0.1915 | 0.2103 | -0.0225 | 0.0061  | - |
| 0.0135 | 1   | .   |                             |        |        |        |         |         |   |
| 1352   | O   | O   | . LEU LEU LEU A A 183 183 . | 0.2251 | 0.2006 | 0.1941 | -0.0573 | 0.0130  | - |
| 0.0253 | 1   | .   |                             |        |        |        |         |         |   |
| 1353   | N   | N   | . GLY GLY GLY A A 184 184 . | 0.2002 | 0.1544 | 0.2023 | -0.0143 | 0.0183  | - |
| 0.0284 | 1   | .   |                             |        |        |        |         |         |   |
| 1354   | CA  | CA  | . GLY GLY GLY A A 184 184 . | 0.2113 | 0.1516 | 0.1961 | -0.0138 | 0.0217  | - |
| 0.0113 | 1   | .   |                             |        |        |        |         |         |   |
| 1355   | C   | C   | . GLY GLY GLY A A 184 184 . | 0.2048 | 0.1332 | 0.1920 | -0.0174 | 0.0091  | - |
| 0.0250 | 1   | .   |                             |        |        |        |         |         |   |
| 1356   | O   | O   | . GLY GLY GLY A A 184 184 . | 0.2227 | 0.1736 | 0.1495 | -0.0409 | 0.0174  | - |
| 0.0316 | 1   | .   |                             |        |        |        |         |         |   |
| 1357   | N   | N   | . ALA ALA ALA A A 185 185 . | 0.2143 | 0.1313 | 0.1629 | -0.0363 | 0.0067  | - |
| 0.0271 | 1   | .   |                             |        |        |        |         |         |   |
| 1358   | CA  | CA  | . ALA ALA ALA A A 185 185 . | 0.2311 | 0.1624 | 0.1764 | -0.0491 | 0.0087  | - |
| 0.0089 | 1   | .   |                             |        |        |        |         |         |   |
| 1359   | CB  | CB  | . ALA ALA ALA A A 185 185 . | 0.1952 | 0.1760 | 0.1606 | -0.0138 | 0.0077  | - |
| 0.0370 | 1   | .   |                             |        |        |        |         |         |   |
| 1360   | C   | C   | . ALA ALA ALA A A 185 185 . | 0.2355 | 0.1557 | 0.1845 | -0.0401 | 0.0158  | - |
| 0.0343 | 1   | .   |                             |        |        |        |         |         |   |
| 1361   | O   | O   | . ALA ALA ALA A A 185 185 . | 0.2891 | 0.1605 | 0.1929 | -0.0548 | 0.0299  | - |
| 0.0405 | 1   | .   |                             |        |        |        |         |         |   |
| 1362   | N   | N   | . GLU GLU GLU A A 186 186 . | 0.2470 | 0.1441 | 0.1666 | -0.0406 | 0.0111  | - |
| 0.0275 | 1   | .   |                             |        |        |        |         |         |   |
| 1363   | CA  | CA  | . GLU GLU GLU A A 186 186 . | 0.2560 | 0.1655 | 0.2181 | -0.0273 | 0.0205  | - |
| 0.0393 | 1   | .   |                             |        |        |        |         |         |   |
| 1364   | CB  | CB  | . GLU GLU GLU A A 186 186 . | 0.2541 | 0.1997 | 0.2191 | -0.0297 | 0.0225  | - |
| 0.0482 | 1   | .   |                             |        |        |        |         |         |   |
| 1365   | CG  | CG  | . GLU GLU GLU A A 186 186 . | 0.2647 | 0.1805 | 0.2631 | -0.0175 | 0.0100  | - |
| 0.0618 | 1   | .   |                             |        |        |        |         |         |   |
| 1366   | CD  | CD  | . GLU GLU GLU A A 186 186 . | 0.2304 | 0.2115 | 0.2838 | -0.0164 | 0.0060  | - |
| 0.0497 | 1   | .   |                             |        |        |        |         |         |   |
| 1367   | OE1 | OE1 | . GLU GLU GLU A A 186 186 . | 0.3075 | 0.2778 | 0.2699 | 0.0327  | -0.0221 | - |
| 0.0548 | 1   | .   |                             |        |        |        |         |         |   |
| 1368   | OE2 | OE2 | . GLU GLU GLU A A 186 186 . | 0.2966 | 0.2026 | 0.2028 | 0.0129  | -0.0248 | - |
| 0.0697 | 1   | .   |                             |        |        |        |         |         |   |
| 1369   | C   | C   | . GLU GLU GLU A A 186 186 . | 0.2726 | 0.1784 | 0.1934 | -0.0132 | 0.0147  | - |
| 0.0418 | 1   | .   |                             |        |        |        |         |         |   |
| 1370   | O   | O   | . GLU GLU GLU A A 186 186 . | 0.2796 | 0.1694 | 0.1974 | -0.0357 | 0.0245  | - |
| 0.0593 | 1   | .   |                             |        |        |        |         |         |   |
| 1371   | N   | N   | . VAL VAL VAL A A 187 187 . | 0.2779 | 0.1736 | 0.1996 | -0.0103 | 0.0018  | - |
| 0.0526 | 1   | .   |                             |        |        |        |         |         |   |
| 1372   | CA  | CA  | . VAL VAL VAL A A 187 187 . | 0.2235 | 0.1722 | 0.1435 | -0.0133 | 0.0223  | - |
| 0.0528 | 1   | .   |                             |        |        |        |         |         |   |
| 1373   | CB  | CB  | . VAL VAL VAL A A 187 187 . | 0.2340 | 0.1454 | 0.1758 | -0.0097 | 0.0152  | - |
| 0.0441 | 1   | .   |                             |        |        |        |         |         |   |
| 1374   | CG1 | CG1 | . VAL VAL VAL A A 187 187 . | 0.2175 | 0.1672 | 0.1406 | -0.0390 | 0.0030  | - |
| 0.0345 | 1   | .   |                             |        |        |        |         |         |   |
| 1375   | CG2 | CG2 | . VAL VAL VAL A A 187 187 . | 0.2587 | 0.1205 | 0.1356 | -0.0247 | 0.0280  | - |
| 0.0624 | 1   | .   |                             |        |        |        |         |         |   |
| 1376   | C   | C   | . VAL VAL VAL A A 187 187 . | 0.2331 | 0.1932 | 0.1894 | -0.0330 | 0.0238  | - |
| 0.0559 | 1   | .   |                             |        |        |        |         |         |   |
| 1377   | O   | O   | . VAL VAL VAL A A 187 187 . | 0.2389 | 0.1928 | 0.1871 | -0.0444 | 0.0035  | - |
| 0.0444 | 1   | .   |                             |        |        |        |         |         |   |
| 1378   | N   | N   | . TYR TYR TYR A A 188 188 . | 0.2224 | 0.1660 | 0.1550 | -0.0391 | 0.0290  | - |
| 0.0573 | 1   | .   |                             |        |        |        |         |         |   |

|        |     |     |                             |        |        |        |         |         |   |
|--------|-----|-----|-----------------------------|--------|--------|--------|---------|---------|---|
| 1379   | CA  | CA  | . TYR TYR TYR A A 188 188 . | 0.2142 | 0.1604 | 0.1621 | -0.0572 | 0.0239  | - |
| 0.0572 | 1   | .   |                             |        |        |        |         |         |   |
| 1380   | CB  | CB  | . TYR TYR TYR A A 188 188 . | 0.1885 | 0.1395 | 0.1618 | -0.0696 | 0.0532  | - |
| 0.0785 | 1   | .   |                             |        |        |        |         |         |   |
| 1381   | CG  | CG  | . TYR TYR TYR A A 188 188 . | 0.2363 | 0.1527 | 0.1611 | -0.0511 | -0.0005 | - |
| 0.0647 | 1   | .   |                             |        |        |        |         |         |   |
| 1382   | CD1 | CD1 | . TYR TYR TYR A A 188 188 . | 0.1878 | 0.2112 | 0.1556 | -0.0520 | 0.0717  | - |
| 0.0595 | 1   | .   |                             |        |        |        |         |         |   |
| 1383   | CE1 | CE1 | . TYR TYR TYR A A 188 188 . | 0.1936 | 0.1631 | 0.1970 | -0.0903 | 0.0400  | - |
| 0.0595 | 1   | .   |                             |        |        |        |         |         |   |
| 1384   | CZ  | CZ  | . TYR TYR TYR A A 188 188 . | 0.1529 | 0.1625 | 0.1509 | -0.0060 | 0.0166  | - |
| 0.0279 | 1   | .   |                             |        |        |        |         |         |   |
| 1385   | OH  | OH  | . TYR TYR TYR A A 188 188 . | 0.2162 | 0.1604 | 0.1923 | -0.0679 | 0.0827  | - |
| 0.0581 | 1   | .   |                             |        |        |        |         |         |   |
| 1386   | CE2 | CE2 | . TYR TYR TYR A A 188 188 . | 0.2181 | 0.1676 | 0.2333 | -0.0153 | 0.0240  | - |
| 0.0539 | 1   | .   |                             |        |        |        |         |         |   |
| 1387   | CD2 | CD2 | . TYR TYR TYR A A 188 188 . | 0.2337 | 0.1756 | 0.1655 | -0.0355 | 0.0238  | - |
| 0.0480 | 1   | .   |                             |        |        |        |         |         |   |
| 1388   | C   | C   | . TYR TYR TYR A A 188 188 . | 0.2028 | 0.1762 | 0.1651 | -0.0541 | 0.0053  | - |
| 0.0586 | 1   | .   |                             |        |        |        |         |         |   |
| 1389   | O   | O   | . TYR TYR TYR A A 188 188 . | 0.2321 | 0.2079 | 0.1758 | -0.0802 | 0.0084  | - |
| 0.0576 | 1   | .   |                             |        |        |        |         |         |   |
| 1390   | N   | N   | . HIS HIS HIS A A 189 189 . | 0.2641 | 0.1659 | 0.1721 | -0.0569 | 0.0078  | - |
| 0.0593 | 1   | .   |                             |        |        |        |         |         |   |
| 1391   | CA  | CA  | . HIS HIS HIS A A 189 189 . | 0.2631 | 0.1764 | 0.1927 | -0.0701 | 0.0000  | - |
| 0.0385 | 1   | .   |                             |        |        |        |         |         |   |
| 1392   | CB  | CB  | . HIS HIS HIS A A 189 189 . | 0.2383 | 0.1917 | 0.2249 | -0.0823 | -0.0018 | - |
| 0.0404 | 1   | .   |                             |        |        |        |         |         |   |
| 1393   | CG  | CG  | . HIS HIS HIS A A 189 189 . | 0.2556 | 0.2291 | 0.2239 | -0.0583 | 0.0208  | - |
| 0.0809 | 1   | .   |                             |        |        |        |         |         |   |
| 1394   | ND1 | ND1 | . HIS HIS HIS A A 189 189 . | 0.3262 | 0.2647 | 0.3491 | -0.0212 | -0.0218 | - |
| 0.1286 | 1   | .   |                             |        |        |        |         |         |   |
| 1395   | CE1 | CE1 | . HIS HIS HIS A A 189 189 . | 0.2445 | 0.1792 | 0.3098 | -0.0125 | 0.0232  | - |
| 0.0606 | 1   | .   |                             |        |        |        |         |         |   |
| 1396   | NE2 | NE2 | . HIS HIS HIS A A 189 189 . | 0.3269 | 0.3161 | 0.2911 | -0.0757 | 0.0453  | - |
| 0.0532 | 1   | .   |                             |        |        |        |         |         |   |
| 1397   | CD2 | CD2 | . HIS HIS HIS A A 189 189 . | 0.2396 | 0.2559 | 0.2527 | -0.0499 | 0.0146  | - |
| 0.0273 | 1   | .   |                             |        |        |        |         |         |   |
| 1398   | C   | C   | . HIS HIS HIS A A 189 189 . | 0.2514 | 0.1662 | 0.1783 | -0.0796 | 0.0041  | - |
| 0.0477 | 1   | .   |                             |        |        |        |         |         |   |
| 1399   | O   | O   | . HIS HIS HIS A A 189 189 . | 0.3088 | 0.1970 | 0.2037 | -0.0682 | -0.0037 | - |
| 0.0468 | 1   | .   |                             |        |        |        |         |         |   |
| 1400   | N   | N   | . THR THR THR A A 190 190 . | 0.2618 | 0.1737 | 0.1871 | -0.0882 | 0.0000  | - |
| 0.0377 | 1   | .   |                             |        |        |        |         |         |   |
| 1401   | CA  | CA  | . THR THR THR A A 190 190 . | 0.2850 | 0.1978 | 0.1965 | -0.0862 | -0.0048 | - |
| 0.0626 | 1   | .   |                             |        |        |        |         |         |   |
| 1402   | CB  | CB  | . THR THR THR A A 190 190 . | 0.2626 | 0.2065 | 0.1914 | -0.0897 | -0.0261 | - |
| 0.0958 | 1   | .   |                             |        |        |        |         |         |   |
| 1403   | OG1 | OG1 | . THR THR THR A A 190 190 . | 0.3213 | 0.2078 | 0.2483 | -0.0636 | 0.0034  | - |
| 0.0916 | 1   | .   |                             |        |        |        |         |         |   |
| 1404   | CG2 | CG2 | . THR THR THR A A 190 190 . | 0.3354 | 0.2042 | 0.2485 | -0.1490 | -0.0106 | - |
| 0.1000 | 1   | .   |                             |        |        |        |         |         |   |
| 1405   | C   | C   | . THR THR THR A A 190 190 . | 0.2725 | 0.2022 | 0.1807 | -0.0836 | -0.0145 | - |
| 0.0608 | 1   | .   |                             |        |        |        |         |         |   |
| 1406   | O   | O   | . THR THR THR A A 190 190 . | 0.3127 | 0.2005 | 0.2125 | -0.0997 | 0.0062  | - |
| 0.0732 | 1   | .   |                             |        |        |        |         |         |   |
| 1407   | N   | N   | . LEU LEU LEU A A 191 191 . | 0.2849 | 0.2162 | 0.1989 | -0.0682 | -0.0200 | - |
| 0.0270 | 1   | .   |                             |        |        |        |         |         |   |
| 1408   | CA  | CA  | . LEU LEU LEU A A 191 191 . | 0.2563 | 0.2222 | 0.1827 | -0.0730 | 0.0019  | - |
| 0.0428 | 1   | .   |                             |        |        |        |         |         |   |

|        |     |     |                             |        |        |        |         |         |   |
|--------|-----|-----|-----------------------------|--------|--------|--------|---------|---------|---|
| 1409   | CB  | CB  | . LEU LEU LEU A A 191 191 . | 0.2655 | 0.2155 | 0.1909 | -0.0554 | 0.0026  | - |
| 0.0240 | 1   | .   |                             |        |        |        |         |         |   |
| 1410   | CG  | CG  | . LEU LEU LEU A A 191 191 . | 0.2281 | 0.2145 | 0.1844 | -0.0743 | -0.0240 | - |
| 0.0303 | 1   | .   |                             |        |        |        |         |         |   |
| 1411   | CD1 | CD1 | . LEU LEU LEU A A 191 191 . | 0.2483 | 0.2526 | 0.1583 | -0.0939 | -0.0157 | - |
| 0.0077 | 1   | .   |                             |        |        |        |         |         |   |
| 1412   | CD2 | CD2 | . LEU LEU LEU A A 191 191 . | 0.2678 | 0.2245 | 0.2390 | -0.0922 | -0.0006 | - |
| 0.0075 | 1   | .   |                             |        |        |        |         |         |   |
| 1413   | C   | C   | . LEU LEU LEU A A 191 191 . | 0.2447 | 0.2217 | 0.1853 | -0.0639 | 0.0214  | - |
| 0.0278 | 1   | .   |                             |        |        |        |         |         |   |
| 1414   | O   | O   | . LEU LEU LEU A A 191 191 . | 0.2410 | 0.2136 | 0.2222 | -0.0644 | -0.0176 | - |
| 0.0696 | 1   | .   |                             |        |        |        |         |         |   |
| 1415   | N   | N   | . LYS LYS LYS A A 192 192 . | 0.2532 | 0.2217 | 0.1748 | -0.0612 | 0.0429  | - |
| 0.0281 | 1   | .   |                             |        |        |        |         |         |   |
| 1416   | CA  | CA  | . LYS LYS LYS A A 192 192 . | 0.2784 | 0.2283 | 0.1766 | -0.0732 | 0.0286  | - |
| 0.0198 | 1   | .   |                             |        |        |        |         |         |   |
| 1417   | CB  | CB  | . LYS LYS LYS A A 192 192 . | 0.2524 | 0.2511 | 0.1903 | -0.0674 | 0.0393  | - |
| 0.0308 | 1   | .   |                             |        |        |        |         |         |   |
| 1418   | CG  | CG  | . LYS LYS LYS A A 192 192 . | 0.2860 | 0.3048 | 0.1794 | -0.0945 | 0.0224  | - |
| 0.0503 | 1   | .   |                             |        |        |        |         |         |   |
| 1419   | CD  | CD  | . LYS LYS LYS A A 192 192 . | 0.2928 | 0.3644 | 0.2326 | -0.0409 | -0.0329 | - |
| 0.0587 | 1   | .   |                             |        |        |        |         |         |   |
| 1420   | CE  | CE  | . LYS LYS LYS A A 192 192 . | 0.3124 | 0.4366 | 0.2685 | -0.0556 | -0.0410 | - |
| 0.0663 | 1   | .   |                             |        |        |        |         |         |   |
| 1421   | NZ  | NZ  | . LYS LYS LYS A A 192 192 . | 0.2591 | 0.3770 | 0.2738 | -0.0860 | -0.0129 | - |
| 0.0617 | 1   | .   |                             |        |        |        |         |         |   |
| 1422   | C   | C   | . LYS LYS LYS A A 192 192 . | 0.2590 | 0.2412 | 0.2237 | -0.0729 | 0.0324  | - |
| 0.0281 | 1   | .   |                             |        |        |        |         |         |   |
| 1423   | O   | O   | . LYS LYS LYS A A 192 192 . | 0.2574 | 0.2611 | 0.2166 | -0.0899 | 0.0223  | - |
| 0.0440 | 1   | .   |                             |        |        |        |         |         |   |
| 1424   | N   | N   | . GLY GLY GLY A A 193 193 . | 0.2974 | 0.2297 | 0.1877 | -0.0730 | 0.0138  | - |
| 0.0247 | 1   | .   |                             |        |        |        |         |         |   |
| 1425   | CA  | CA  | . GLY GLY GLY A A 193 193 . | 0.2865 | 0.2388 | 0.2361 | -0.0844 | 0.0017  | - |
| 0.0240 | 1   | .   |                             |        |        |        |         |         |   |
| 1426   | C   | C   | . GLY GLY GLY A A 193 193 . | 0.2608 | 0.2657 | 0.2160 | -0.0809 | 0.0081  | - |
| 0.0304 | 1   | .   |                             |        |        |        |         |         |   |
| 1427   | O   | O   | . GLY GLY GLY A A 193 193 . | 0.2824 | 0.2730 | 0.2507 | -0.1193 | -0.0027 | - |
| 0.0433 | 1   | .   |                             |        |        |        |         |         |   |
| 1428   | N   | N   | . VAL VAL VAL A A 194 194 . | 0.2601 | 0.2335 | 0.2247 | -0.0816 | 0.0008  | - |
| 0.0140 | 1   | .   |                             |        |        |        |         |         |   |
| 1429   | CA  | CA  | . VAL VAL VAL A A 194 194 . | 0.2719 | 0.2336 | 0.2300 | -0.0716 | 0.0014  | - |
| 0.0133 | 1   | .   |                             |        |        |        |         |         |   |
| 1430   | CB  | CB  | . VAL VAL VAL A A 194 194 . | 0.2779 | 0.2397 | 0.2555 | -0.0579 | 0.0031  | - |
| 0.0216 | 1   | .   |                             |        |        |        |         |         |   |
| 1431   | CG1 | CG1 | . VAL VAL VAL A A 194 194 . | 0.3310 | 0.2561 | 0.1830 | -0.0638 | -0.0230 | - |
| 0.0745 | 1   | .   |                             |        |        |        |         |         |   |
| 1432   | CG2 | CG2 | . VAL VAL VAL A A 194 194 . | 0.2864 | 0.2367 | 0.2487 | -0.0840 | -0.0028 | - |
| 0.0821 | 1   | .   |                             |        |        |        |         |         |   |
| 1433   | C   | C   | . VAL VAL VAL A A 194 194 . | 0.2932 | 0.2553 | 0.2671 | -0.0733 | -0.0010 | - |
| 0.0238 | 1   | .   |                             |        |        |        |         |         |   |
| 1434   | O   | O   | . VAL VAL VAL A A 194 194 . | 0.3178 | 0.2986 | 0.2759 | -0.1063 | -0.0222 | - |
| 0.0394 | 1   | .   |                             |        |        |        |         |         |   |
| 1435   | N   | N   | . ILE ILE ILE A A 195 195 . | 0.2891 | 0.2145 | 0.2220 | -0.0824 | 0.0089  | - |
| 0.0203 | 1   | .   |                             |        |        |        |         |         |   |
| 1436   | CA  | CA  | . ILE ILE ILE A A 195 195 . | 0.2812 | 0.2342 | 0.2666 | -0.0875 | 0.0038  | - |
| 0.0302 | 1   | .   |                             |        |        |        |         |         |   |
| 1437   | CB  | CB  | . ILE ILE ILE A A 195 195 . | 0.3267 | 0.1859 | 0.2585 | -0.0619 | 0.0126  | - |
| 0.0430 | 1   | .   |                             |        |        |        |         |         |   |
| 1438   | CG1 | CG1 | . ILE ILE ILE A A 195 195 . | 0.2056 | 0.1791 | 0.2349 | -0.0857 | 0.0227  | - |
| 0.0302 | 1   | .   |                             |        |        |        |         |         |   |

|        |     |     |                             |        |        |        |         |         |   |
|--------|-----|-----|-----------------------------|--------|--------|--------|---------|---------|---|
| 1439   | CD  | CD  | . ILE ILE ILE A A 195 195 . | 0.2774 | 0.1974 | 0.3138 | -0.1031 | 0.0429  | - |
| 0.0379 | 1   | .   |                             |        |        |        |         |         |   |
| 1440   | CG2 | CG2 | . ILE ILE ILE A A 195 195 . | 0.2701 | 0.2800 | 0.2634 | -0.1177 | 0.0344  | - |
| 0.0462 | 1   | .   |                             |        |        |        |         |         |   |
| 1441   | C   | C   | . ILE ILE ILE A A 195 195 . | 0.2897 | 0.2446 | 0.2576 | -0.0806 | 0.0029  | - |
| 0.0321 | 1   | .   |                             |        |        |        |         |         |   |
| 1442   | O   | O   | . ILE ILE ILE A A 195 195 . | 0.2775 | 0.2874 | 0.2544 | -0.1170 | -0.0280 | - |
| 0.0469 | 1   | .   |                             |        |        |        |         |         |   |
| 1443   | N   | N   | . LYS LYS LYS A A 196 196 . | 0.2841 | 0.2370 | 0.2798 | -0.0959 | 0.0072  | - |
| 0.0309 | 1   | .   |                             |        |        |        |         |         |   |
| 1444   | CA  | CA  | . LYS LYS LYS A A 196 196 . | 0.3052 | 0.2481 | 0.2811 | -0.1022 | 0.0097  | - |
| 0.0234 | 1   | .   |                             |        |        |        |         |         |   |
| 1445   | CB  | CB  | . LYS LYS LYS A A 196 196 . | 0.2957 | 0.2568 | 0.2661 | -0.0834 | 0.0140  | - |
| 0.0208 | 1   | .   |                             |        |        |        |         |         |   |
| 1446   | CG  | CG  | . LYS LYS LYS A A 196 196 . | 0.3351 | 0.3067 | 0.3461 | -0.0621 | -0.0106 | - |
| 0.0131 | 1   | .   |                             |        |        |        |         |         |   |
| 1447   | CD  | CD  | . LYS LYS LYS A A 196 196 . | 0.4502 | 0.4709 | 0.4778 | -0.0178 | -0.0701 | - |
| 0.0133 | 1   | .   |                             |        |        |        |         |         |   |
| 1448   | CE  | CE  | . LYS LYS LYS A A 196 196 . | 0.5157 | 0.5211 | 0.5489 | 0.0209  | -0.0754 | - |
| 0.0428 | 1   | .   |                             |        |        |        |         |         |   |
| 1449   | NZ  | NZ  | . LYS LYS LYS A A 196 196 . | 0.5357 | 0.5915 | 0.6075 | 0.0420  | -0.0689 | - |
| 0.0438 | 1   | .   |                             |        |        |        |         |         |   |
| 1450   | C   | C   | . LYS LYS LYS A A 196 196 . | 0.3345 | 0.2950 | 0.3229 | -0.1084 | 0.0239  | - |
| 0.0292 | 1   | .   |                             |        |        |        |         |         |   |
| 1451   | O   | O   | . LYS LYS LYS A A 196 196 . | 0.3149 | 0.3257 | 0.2824 | -0.1381 | 0.0260  | - |
| 0.0298 | 1   | .   |                             |        |        |        |         |         |   |
| 1452   | N   | N   | . ASP ASP ASP A A 197 197 . | 0.3407 | 0.2675 | 0.3189 | -0.1123 | 0.0311  | - |
| 0.0282 | 1   | .   |                             |        |        |        |         |         |   |
| 1453   | CA  | CA  | . ASP ASP ASP A A 197 197 . | 0.3574 | 0.3152 | 0.3697 | -0.1153 | 0.0261  | - |
| 0.0249 | 1   | .   |                             |        |        |        |         |         |   |
| 1454   | CB  | CB  | . ASP ASP ASP A A 197 197 . | 0.3876 | 0.2939 | 0.3919 | -0.1173 | 0.0103  | - |
| 0.0492 | 1   | .   |                             |        |        |        |         |         |   |
| 1455   | CG  | CG  | . ASP ASP ASP A A 197 197 . | 0.4400 | 0.3625 | 0.4312 | -0.1168 | 0.0033  | - |
| 0.0322 | 1   | .   |                             |        |        |        |         |         |   |
| 1456   | OD1 | OD1 | . ASP ASP ASP A A 197 197 . | 0.5056 | 0.4099 | 0.4819 | -0.1195 | 0.0435  | - |
| 0.0749 | 1   | .   |                             |        |        |        |         |         |   |
| 1457   | OD2 | OD2 | . ASP ASP ASP A A 197 197 . | 0.5750 | 0.4234 | 0.4708 | -0.1668 | -0.0206 | - |
| 0.0338 | 1   | .   |                             |        |        |        |         |         |   |
| 1458   | C   | C   | . ASP ASP ASP A A 197 197 . | 0.3712 | 0.3310 | 0.3701 | -0.1109 | 0.0182  | - |
| 0.0201 | 1   | .   |                             |        |        |        |         |         |   |
| 1459   | O   | O   | . ASP ASP ASP A A 197 197 . | 0.3701 | 0.3690 | 0.3810 | -0.1563 | 0.0557  | - |
| 0.0065 | 1   | .   |                             |        |        |        |         |         |   |
| 1460   | N   | N   | . LYS LYS LYS A A 198 198 . | 0.3641 | 0.3406 | 0.3577 | -0.1007 | 0.0129  | - |
| 0.0244 | 1   | .   |                             |        |        |        |         |         |   |
| 1461   | CA  | CA  | . LYS LYS LYS A A 198 198 . | 0.3344 | 0.3746 | 0.3861 | -0.0798 | 0.0062  | - |
| 0.0342 | 1   | .   |                             |        |        |        |         |         |   |
| 1462   | CB  | CB  | . LYS LYS LYS A A 198 198 . | 0.3348 | 0.3707 | 0.3996 | -0.0726 | 0.0003  | - |
| 0.0168 | 1   | .   |                             |        |        |        |         |         |   |
| 1463   | CG  | CG  | . LYS LYS LYS A A 198 198 . | 0.3781 | 0.4121 | 0.4008 | -0.0602 | -0.0244 | - |
| 0.0071 | 1   | .   |                             |        |        |        |         |         |   |
| 1464   | CD  | CD  | . LYS LYS LYS A A 198 198 . | 0.4619 | 0.4263 | 0.4225 | -0.0542 | -0.0569 | - |
| 0.0385 | 1   | .   |                             |        |        |        |         |         |   |
| 1465   | CE  | CE  | . LYS LYS LYS A A 198 198 . | 0.4692 | 0.4459 | 0.4402 | -0.0787 | -0.0890 | - |
| 0.0010 | 1   | .   |                             |        |        |        |         |         |   |
| 1466   | NZ  | NZ  | . LYS LYS LYS A A 198 198 . | 0.4962 | 0.5054 | 0.3618 | -0.1004 | -0.0673 | - |
| 0.0184 | 1   | .   |                             |        |        |        |         |         |   |
| 1467   | C   | C   | . LYS LYS LYS A A 198 198 . | 0.3353 | 0.4018 | 0.4065 | -0.0851 | 0.0029  | - |
| 0.0402 | 1   | .   |                             |        |        |        |         |         |   |
| 1468   | O   | O   | . LYS LYS LYS A A 198 198 . | 0.3163 | 0.4301 | 0.4287 | -0.1140 | 0.0028  | - |
| 0.0490 | 1   | .   |                             |        |        |        |         |         |   |

|        |     |     |                             |        |        |        |         |         |   |
|--------|-----|-----|-----------------------------|--------|--------|--------|---------|---------|---|
| 1469   | N   | N   | . TYR TYR TYR A A 199 199 . | 0.3003 | 0.3874 | 0.3667 | -0.0894 | -0.0157 | - |
| 0.0424 | 1   | .   |                             |        |        |        |         |         |   |
| 1470   | CA  | CA  | . TYR TYR TYR A A 199 199 . | 0.3024 | 0.4038 | 0.3827 | -0.0639 | -0.0033 | - |
| 0.0297 | 1   | .   |                             |        |        |        |         |         |   |
| 1471   | CB  | CB  | . TYR TYR TYR A A 199 199 . | 0.2582 | 0.4032 | 0.3544 | -0.0286 | -0.0068 | - |
| 0.0168 | 1   | .   |                             |        |        |        |         |         |   |
| 1472   | CG  | CG  | . TYR TYR TYR A A 199 199 . | 0.2935 | 0.4502 | 0.3647 | -0.0303 | 0.0047  | - |
| 0.0337 | 1   | .   |                             |        |        |        |         |         |   |
| 1473   | CD1 | CD1 | . TYR TYR TYR A A 199 199 . | 0.3057 | 0.3632 | 0.3162 | -0.0368 | -0.0120 | - |
| 0.0709 | 1   | .   |                             |        |        |        |         |         |   |
| 1474   | CE1 | CE1 | . TYR TYR TYR A A 199 199 . | 0.3847 | 0.3738 | 0.3580 | -0.0031 | -0.0244 | - |
| 0.0701 | 1   | .   |                             |        |        |        |         |         |   |
| 1475   | CZ  | CZ  | . TYR TYR TYR A A 199 199 . | 0.3917 | 0.3832 | 0.3672 | 0.0119  | -0.0342 | - |
| 0.0597 | 1   | .   |                             |        |        |        |         |         |   |
| 1476   | OH  | OH  | . TYR TYR TYR A A 199 199 . | 0.5171 | 0.4121 | 0.3406 | -0.0246 | -0.0245 | - |
| 0.0433 | 1   | .   |                             |        |        |        |         |         |   |
| 1477   | CE2 | CE2 | . TYR TYR TYR A A 199 199 . | 0.3784 | 0.4973 | 0.3735 | -0.0115 | -0.0435 | - |
| 0.0326 | 1   | .   |                             |        |        |        |         |         |   |
| 1478   | CD2 | CD2 | . TYR TYR TYR A A 199 199 . | 0.3130 | 0.4956 | 0.3779 | -0.0059 | -0.0299 | - |
| 0.0361 | 1   | .   |                             |        |        |        |         |         |   |
| 1479   | C   | C   | . TYR TYR TYR A A 199 199 . | 0.3394 | 0.4063 | 0.3769 | -0.0570 | 0.0053  | - |
| 0.0271 | 1   | .   |                             |        |        |        |         |         |   |
| 1480   | O   | O   | . TYR TYR TYR A A 199 199 . | 0.3833 | 0.4389 | 0.4287 | -0.0778 | 0.0185  | - |
| 0.0624 | 1   | .   |                             |        |        |        |         |         |   |
| 1481   | N   | N   | . GLY GLY GLY A A 200 200 . | 0.3460 | 0.4000 | 0.3822 | -0.0666 | 0.0052  | - |
| 0.0190 | 1   | .   |                             |        |        |        |         |         |   |
| 1482   | CA  | CA  | . GLY GLY GLY A A 200 200 . | 0.3306 | 0.3796 | 0.3584 | -0.0677 | -0.0103 | - |
| 0.0240 | 1   | .   |                             |        |        |        |         |         |   |
| 1483   | C   | C   | . GLY GLY GLY A A 200 200 . | 0.3263 | 0.3725 | 0.3536 | -0.0601 | -0.0057 | - |
| 0.0195 | 1   | .   |                             |        |        |        |         |         |   |
| 1484   | O   | O   | . GLY GLY GLY A A 200 200 . | 0.3038 | 0.3779 | 0.3004 | -0.0782 | 0.0169  | - |
| 0.0394 | 1   | .   |                             |        |        |        |         |         |   |
| 1485   | N   | N   | . LYS LYS LYS A A 201 201 . | 0.3306 | 0.3663 | 0.3557 | -0.0468 | -0.0025 | - |
| 0.0128 | 1   | .   |                             |        |        |        |         |         |   |
| 1486   | CA  | CA  | . LYS LYS LYS A A 201 201 . | 0.3300 | 0.3762 | 0.3662 | -0.0316 | -0.0154 | - |
| 0.0183 | 1   | .   |                             |        |        |        |         |         |   |
| 1487   | CB  | CB  | . LYS LYS LYS A A 201 201 . | 0.3657 | 0.4066 | 0.4096 | -0.0153 | -0.0200 | - |
| 0.0017 | 1   | .   |                             |        |        |        |         |         |   |
| 1488   | CG  | CG  | . LYS LYS LYS A A 201 201 . | 0.4149 | 0.4349 | 0.4907 | -0.0287 | -0.0197 | - |
| 0.0317 | 1   | .   |                             |        |        |        |         |         |   |
| 1489   | CD  | CD  | . LYS LYS LYS A A 201 201 . | 0.5181 | 0.5269 | 0.5494 | 0.0039  | -0.0458 | - |
| 0.0150 | 1   | .   |                             |        |        |        |         |         |   |
| 1490   | CE  | CE  | . LYS LYS LYS A A 201 201 . | 0.5260 | 0.5755 | 0.6182 | -0.0024 | -0.0154 | - |
| 0.0066 | 1   | .   |                             |        |        |        |         |         |   |
| 1491   | NZ  | NZ  | . LYS LYS LYS A A 201 201 . | 0.6112 | 0.5929 | 0.6853 | -0.0394 | 0.0011  | - |
| 0.0260 | 1   | .   |                             |        |        |        |         |         |   |
| 1492   | C   | C   | . LYS LYS LYS A A 201 201 . | 0.3121 | 0.3648 | 0.3332 | -0.0377 | -0.0114 | - |
| 0.0156 | 1   | .   |                             |        |        |        |         |         |   |
| 1493   | O   | O   | . LYS LYS LYS A A 201 201 . | 0.2842 | 0.3468 | 0.3206 | -0.0580 | -0.0086 | - |
| 0.0335 | 1   | .   |                             |        |        |        |         |         |   |
| 1494   | N   | N   | . ASP ASP ASP A A 202 202 . | 0.2773 | 0.3491 | 0.2706 | -0.0519 | -0.0077 | - |
| 0.0230 | 1   | .   |                             |        |        |        |         |         |   |
| 1495   | CA  | CA  | . ASP ASP ASP A A 202 202 . | 0.2730 | 0.3613 | 0.2970 | -0.0484 | -0.0072 | - |
| 0.0226 | 1   | .   |                             |        |        |        |         |         |   |
| 1496   | CB  | CB  | . ASP ASP ASP A A 202 202 . | 0.2837 | 0.3870 | 0.2903 | -0.0621 | 0.0093  | - |
| 0.0356 | 1   | .   |                             |        |        |        |         |         |   |
| 1497   | CG  | CG  | . ASP ASP ASP A A 202 202 . | 0.3472 | 0.4913 | 0.3980 | -0.0363 | 0.0271  | - |
| 0.0751 | 1   | .   |                             |        |        |        |         |         |   |
| 1498   | OD1 | OD1 | . ASP ASP ASP A A 202 202 . | 0.3763 | 0.6327 | 0.5888 | -0.0468 | 0.0781  | - |
| 0.1073 | 1   | .   |                             |        |        |        |         |         |   |





|        |     |     |                             |        |        |        |         |         |   |
|--------|-----|-----|-----------------------------|--------|--------|--------|---------|---------|---|
| 1529   | N   | N   | . GLY GLY GLY A A 207 207 . | 0.1792 | 0.2224 | 0.1912 | -0.0197 | 0.0429  | - |
| 0.0087 | 1   | .   |                             |        |        |        |         |         |   |
| 1530   | CA  | CA  | . GLY GLY GLY A A 207 207 . | 0.1660 | 0.1840 | 0.1899 | -0.0328 | 0.0280  | - |
| 0.0193 | 1   | .   |                             |        |        |        |         |         |   |
| 1531   | C   | C   | . GLY GLY GLY A A 207 207 . | 0.1829 | 0.1950 | 0.1921 | -0.0196 | 0.0169  | - |
| 0.0285 | 1   | .   |                             |        |        |        |         |         |   |
| 1532   | O   | O   | . GLY GLY GLY A A 207 207 . | 0.1831 | 0.1842 | 0.1957 | -0.0348 | 0.0039  | - |
| 0.0248 | 1   | .   |                             |        |        |        |         |         |   |
| 1533   | N   | N   | . ASP ASP ASP A A 208 208 . | 0.1934 | 0.2000 | 0.1697 | -0.0380 | 0.0213  | - |
| 0.0067 | 1   | .   |                             |        |        |        |         |         |   |
| 1534   | CA  | CA  | . ASP ASP ASP A A 208 208 . | 0.1705 | 0.1982 | 0.1818 | -0.0241 | 0.0232  | - |
| 0.0238 | 1   | .   |                             |        |        |        |         |         |   |
| 1535   | CB  | CB  | . ASP ASP ASP A A 208 208 . | 0.1736 | 0.2072 | 0.1782 | 0.0003  | 0.0211  | - |
| 0.0275 | 1   | .   |                             |        |        |        |         |         |   |
| 1536   | CG  | CG  | . ASP ASP ASP A A 208 208 . | 0.1982 | 0.2258 | 0.2382 | -0.0128 | 0.0208  | - |
| 0.0147 | 1   | .   |                             |        |        |        |         |         |   |
| 1537   | OD1 | OD1 | . ASP ASP ASP A A 208 208 . | 0.1883 | 0.2551 | 0.2618 | -0.0040 | 0.0052  | - |
| 0.0249 | 1   | .   |                             |        |        |        |         |         |   |
| 1538   | OD2 | OD2 | . ASP ASP ASP A A 208 208 . | 0.2468 | 0.2492 | 0.3258 | 0.0284  | -0.0057 | - |
| 0.0120 | 1   | .   |                             |        |        |        |         |         |   |
| 1539   | C   | C   | . ASP ASP ASP A A 208 208 . | 0.1762 | 0.2081 | 0.1672 | -0.0116 | 0.0232  | - |
| 0.0255 | 1   | .   |                             |        |        |        |         |         |   |
| 1540   | O   | O   | . ASP ASP ASP A A 208 208 . | 0.1808 | 0.1767 | 0.1733 | -0.0095 | 0.0213  | - |
| 0.0240 | 1   | .   |                             |        |        |        |         |         |   |
| 1541   | N   | N   | . GLU GLU GLU A A 209 209 . | 0.1696 | 0.1942 | 0.1715 | -0.0131 | 0.0061  | - |
| 0.0181 | 1   | .   |                             |        |        |        |         |         |   |
| 1542   | CA  | CA  | . GLU GLU GLU A A 209 209 . | 0.1713 | 0.1702 | 0.1587 | -0.0126 | 0.0033  | - |
| 0.0041 | 1   | .   |                             |        |        |        |         |         |   |
| 1543   | CB  | CB  | . GLU GLU GLU A A 209 209 . | 0.1882 | 0.2034 | 0.1804 | 0.0025  | -0.0173 | - |
| 0.0028 | 1   | .   |                             |        |        |        |         |         |   |
| 1544   | CG  | CG  | . GLU GLU GLU A A 209 209 . | 0.2051 | 0.1732 | 0.2317 | -0.0281 | 0.0097  | - |
| 0.0021 | 1   | .   |                             |        |        |        |         |         |   |
| 1545   | CD  | CD  | . GLU GLU GLU A A 209 209 . | 0.2909 | 0.3077 | 0.3081 | -0.0157 | 0.0388  | - |
| 0.0263 | 1   | .   |                             |        |        |        |         |         |   |
| 1546   | OE1 | OE1 | . GLU GLU GLU A A 209 209 . | 0.2283 | 0.3511 | 0.3482 | -0.0635 | -0.0136 | - |
| 0.0412 | 1   | .   |                             |        |        |        |         |         |   |
| 1547   | OE2 | OE2 | . GLU GLU GLU A A 209 209 . | 0.2650 | 0.3633 | 0.3775 | -0.0038 | 0.0582  | - |
| 0.0531 | 1   | .   |                             |        |        |        |         |         |   |
| 1548   | C   | C   | . GLU GLU GLU A A 209 209 . | 0.1740 | 0.1640 | 0.1630 | -0.0351 | -0.0041 | - |
| 0.0238 | 1   | .   |                             |        |        |        |         |         |   |
| 1549   | O   | O   | . GLU GLU GLU A A 209 209 . | 0.1903 | 0.1607 | 0.1475 | -0.0110 | 0.0111  | - |
| 0.0159 | 1   | .   |                             |        |        |        |         |         |   |
| 1550   | N   | N   | . GLY GLY GLY A A 210 210 . | 0.1627 | 0.1401 | 0.1471 | -0.0426 | -0.0061 | - |
| 0.0150 | 1   | .   |                             |        |        |        |         |         |   |
| 1551   | CA  | CA  | . GLY GLY GLY A A 210 210 . | 0.1533 | 0.1542 | 0.1846 | -0.0394 | 0.0078  | - |
| 0.0230 | 1   | .   |                             |        |        |        |         |         |   |
| 1552   | C   | C   | . GLY GLY GLY A A 210 210 . | 0.1592 | 0.1535 | 0.1495 | -0.0216 | 0.0144  | - |
| 0.0213 | 1   | .   |                             |        |        |        |         |         |   |
| 1553   | O   | O   | . GLY GLY GLY A A 210 210 . | 0.1938 | 0.1733 | 0.2035 | -0.0608 | 0.0338  | - |
| 0.0341 | 1   | .   |                             |        |        |        |         |         |   |
| 1554   | N   | N   | . GLY GLY GLY A A 211 211 . | 0.1825 | 0.1851 | 0.1641 | -0.0607 | 0.0165  | - |
| 0.0243 | 1   | .   |                             |        |        |        |         |         |   |
| 1555   | CA  | CA  | . GLY GLY GLY A A 211 211 . | 0.1694 | 0.1935 | 0.1423 | -0.0752 | 0.0345  | - |
| 0.0522 | 1   | .   |                             |        |        |        |         |         |   |
| 1556   | C   | C   | . GLY GLY GLY A A 211 211 . | 0.2265 | 0.1854 | 0.1838 | -0.0754 | 0.0315  | - |
| 0.0411 | 1   | .   |                             |        |        |        |         |         |   |
| 1557   | O   | O   | . GLY GLY GLY A A 211 211 . | 0.2035 | 0.2057 | 0.2095 | -0.0861 | 0.0469  | - |
| 0.0546 | 1   | .   |                             |        |        |        |         |         |   |
| 1558   | N   | N   | . PHE PHE PHE A A 212 212 . | 0.2219 | 0.2245 | 0.2028 | -0.0991 | 0.0512  | - |
| 0.0207 | 1   | .   |                             |        |        |        |         |         |   |



|        |     |     |                             |        |        |        |         |         |   |
|--------|-----|-----|-----------------------------|--------|--------|--------|---------|---------|---|
| 1589   | CG1 | CG1 | . ILE ILE ILE A A 216 216 . | 0.2797 | 0.3711 | 0.3412 | -0.0364 | 0.0709  | - |
| 0.0311 | 1   | .   |                             |        |        |        |         |         |   |
| 1590   | CD  | CD  | . ILE ILE ILE A A 216 216 . | 0.3455 | 0.4058 | 0.2988 | 0.0163  | 0.0618  | - |
| 0.0511 | 1   | .   |                             |        |        |        |         |         |   |
| 1591   | CG2 | CG2 | . ILE ILE ILE A A 216 216 . | 0.3175 | 0.3549 | 0.3619 | -0.0404 | 0.0088  | - |
| 0.0146 | 1   | .   |                             |        |        |        |         |         |   |
| 1592   | C   | C   | . ILE ILE ILE A A 216 216 . | 0.2817 | 0.3570 | 0.3296 | -0.0489 | 0.0240  | - |
| 0.0236 | 1   | .   |                             |        |        |        |         |         |   |
| 1593   | O   | O   | . ILE ILE ILE A A 216 216 . | 0.2578 | 0.3693 | 0.3914 | -0.0591 | 0.0384  | - |
| 0.0408 | 1   | .   |                             |        |        |        |         |         |   |
| 1594   | N   | N   | . LEU LEU LEU A A 217 217 . | 0.2481 | 0.3580 | 0.3225 | -0.0556 | 0.0176  | - |
| 0.0156 | 1   | .   |                             |        |        |        |         |         |   |
| 1595   | CA  | CA  | . LEU LEU LEU A A 217 217 . | 0.2745 | 0.3454 | 0.3420 | -0.0329 | 0.0334  | - |
| 0.0064 | 1   | .   |                             |        |        |        |         |         |   |
| 1596   | CB  | CB  | . LEU LEU LEU A A 217 217 . | 0.2785 | 0.3572 | 0.3685 | -0.0396 | 0.0244  | - |
| 0.0162 | 1   | .   |                             |        |        |        |         |         |   |
| 1597   | CG  | CG  | . LEU LEU LEU A A 217 217 . | 0.3129 | 0.3988 | 0.3904 | -0.0426 | 0.0239  | - |
| 0.0128 | 1   | .   |                             |        |        |        |         |         |   |
| 1598   | CD1 | CD1 | . LEU LEU LEU A A 217 217 . | 0.3699 | 0.3937 | 0.4004 | -0.0542 | 0.0660  | - |
| 0.0411 | 1   | .   |                             |        |        |        |         |         |   |
| 1599   | CD2 | CD2 | . LEU LEU LEU A A 217 217 . | 0.3186 | 0.4248 | 0.3750 | -0.0735 | 0.0081  | - |
| 0.0573 | 1   | .   |                             |        |        |        |         |         |   |
| 1600   | C   | C   | . LEU LEU LEU A A 217 217 . | 0.3131 | 0.3515 | 0.3582 | -0.0361 | 0.0274  | - |
| 0.0123 | 1   | .   |                             |        |        |        |         |         |   |
| 1601   | O   | O   | . LEU LEU LEU A A 217 217 . | 0.3637 | 0.3590 | 0.3757 | -0.0343 | 0.0242  | - |
| 0.0039 | 1   | .   |                             |        |        |        |         |         |   |
| 1602   | N   | N   | . GLU GLU GLU A A 218 218 . | 0.2853 | 0.3532 | 0.3569 | -0.0601 | 0.0279  | - |
| 0.0038 | 1   | .   |                             |        |        |        |         |         |   |
| 1603   | CA  | CA  | . GLU GLU GLU A A 218 218 . | 0.2845 | 0.3539 | 0.3648 | -0.0606 | 0.0509  | - |
| 0.0157 | 1   | .   |                             |        |        |        |         |         |   |
| 1604   | CB  | CB  | . GLU GLU GLU A A 218 218 . | 0.2555 | 0.3527 | 0.3818 | -0.0866 | 0.0278  | - |
| 0.0200 | 1   | .   |                             |        |        |        |         |         |   |
| 1605   | CG  | CG  | . GLU GLU GLU A A 218 218 . | 0.2433 | 0.3930 | 0.4536 | -0.0422 | 0.0685  | - |
| 0.0030 | 1   | .   |                             |        |        |        |         |         |   |
| 1606   | C   | C   | . GLU GLU GLU A A 218 218 . | 0.2574 | 0.3304 | 0.3488 | -0.0546 | 0.0435  | - |
| 0.0126 | 1   | .   |                             |        |        |        |         |         |   |
| 1607   | O   | O   | . GLU GLU GLU A A 218 218 . | 0.2729 | 0.3506 | 0.3371 | -0.0625 | 0.0699  | - |
| 0.0123 | 1   | .   |                             |        |        |        |         |         |   |
| 1608   | N   | N   | . ASN ASN ASN A A 219 219 . | 0.2492 | 0.3378 | 0.3285 | -0.0637 | 0.0649  | - |
| 0.0260 | 1   | .   |                             |        |        |        |         |         |   |
| 1609   | CA  | CA  | . ASN ASN ASN A A 219 219 . | 0.2818 | 0.3568 | 0.3434 | -0.0403 | 0.0432  | - |
| 0.0361 | 1   | .   |                             |        |        |        |         |         |   |
| 1610   | CB  | CB  | . ASN ASN ASN A A 219 219 . | 0.2847 | 0.3571 | 0.3276 | -0.0443 | 0.0668  | - |
| 0.0341 | 1   | .   |                             |        |        |        |         |         |   |
| 1611   | CG  | CG  | . ASN ASN ASN A A 219 219 . | 0.3154 | 0.4304 | 0.3834 | -0.0115 | 0.0270  | - |
| 0.0514 | 1   | .   |                             |        |        |        |         |         |   |
| 1612   | OD1 | OD1 | . ASN ASN ASN A A 219 219 . | 0.3440 | 0.4783 | 0.4626 | 0.0054  | 0.0225  | - |
| 0.0391 | 1   | .   |                             |        |        |        |         |         |   |
| 1613   | ND2 | ND2 | . ASN ASN ASN A A 219 219 . | 0.2007 | 0.3367 | 0.2373 | -0.0418 | 0.0677  | - |
| 0.0224 | 1   | .   |                             |        |        |        |         |         |   |
| 1614   | C   | C   | . ASN ASN ASN A A 219 219 . | 0.2849 | 0.3534 | 0.3460 | -0.0471 | 0.0328  | - |
| 0.0360 | 1   | .   |                             |        |        |        |         |         |   |
| 1615   | O   | O   | . ASN ASN ASN A A 219 219 . | 0.2496 | 0.3296 | 0.3301 | -0.0623 | -0.0170 | - |
| 0.0420 | 1   | .   |                             |        |        |        |         |         |   |
| 1616   | N   | N   | . SER SER SER A A 220 220 . | 0.2723 | 0.3848 | 0.3352 | -0.0570 | 0.0134  | - |
| 0.0414 | 1   | .   |                             |        |        |        |         |         |   |
| 1617   | CA  | CA  | . SER SER SER A A 220 220 . | 0.3115 | 0.3686 | 0.3596 | -0.0735 | 0.0104  | - |
| 0.0434 | 1   | .   |                             |        |        |        |         |         |   |
| 1618   | CB  | CB  | . SER SER SER A A 220 220 . | 0.3177 | 0.3960 | 0.3604 | -0.0814 | 0.0258  | - |
| 0.0431 | 1   | .   |                             |        |        |        |         |         |   |









|        |     |     |                             |        |        |        |         |         |   |
|--------|-----|-----|-----------------------------|--------|--------|--------|---------|---------|---|
| 1739   | O   | O   | . THR THR THR A A 236 236 . | 0.3372 | 0.2867 | 0.2355 | -0.0545 | -0.0389 | - |
| 0.0716 | 1   | .   |                             |        |        |        |         |         |   |
| 1740   | N   | N   | . GLU GLU GLU A A 237 237 . | 0.3351 | 0.2712 | 0.2715 | -0.0749 | -0.0099 | - |
| 0.0574 | 1   | .   |                             |        |        |        |         |         |   |
| 1741   | CA  | CA  | . GLU GLU GLU A A 237 237 . | 0.3587 | 0.2994 | 0.2880 | -0.0805 | 0.0015  | - |
| 0.0644 | 1   | .   |                             |        |        |        |         |         |   |
| 1742   | CB  | CB  | . GLU GLU GLU A A 237 237 . | 0.4069 | 0.3215 | 0.3051 | -0.0710 | 0.0199  | - |
| 0.0709 | 1   | .   |                             |        |        |        |         |         |   |
| 1743   | C   | C   | . GLU GLU GLU A A 237 237 . | 0.3614 | 0.3024 | 0.2698 | -0.0713 | 0.0135  | - |
| 0.0474 | 1   | .   |                             |        |        |        |         |         |   |
| 1744   | O   | O   | . GLU GLU GLU A A 237 237 . | 0.3901 | 0.3562 | 0.2623 | -0.0865 | -0.0008 | - |
| 0.0606 | 1   | .   |                             |        |        |        |         |         |   |
| 1745   | N   | N   | . LYS LYS LYS A A 238 238 . | 0.3195 | 0.2449 | 0.2131 | -0.0587 | 0.0071  | - |
| 0.0794 | 1   | .   |                             |        |        |        |         |         |   |
| 1746   | CA  | CA  | . LYS LYS LYS A A 238 238 . | 0.2694 | 0.2404 | 0.2136 | -0.0421 | 0.0307  | - |
| 0.0509 | 1   | .   |                             |        |        |        |         |         |   |
| 1747   | CB  | CB  | . LYS LYS LYS A A 238 238 . | 0.2969 | 0.2364 | 0.2409 | -0.0144 | 0.0470  | - |
| 0.0425 | 1   | .   |                             |        |        |        |         |         |   |
| 1748   | CG  | CG  | . LYS LYS LYS A A 238 238 . | 0.3250 | 0.2828 | 0.3147 | 0.0274  | 0.0422  | - |
| 0.0505 | 1   | .   |                             |        |        |        |         |         |   |
| 1749   | CD  | CD  | . LYS LYS LYS A A 238 238 . | 0.3927 | 0.3365 | 0.3133 | 0.0058  | 0.0402  | - |
| 0.0131 | 1   | .   |                             |        |        |        |         |         |   |
| 1750   | CE  | CE  | . LYS LYS LYS A A 238 238 . | 0.5227 | 0.2952 | 0.4116 | 0.0633  | 0.0876  | - |
| 0.0284 | 1   | .   |                             |        |        |        |         |         |   |
| 1751   | C   | C   | . LYS LYS LYS A A 238 238 . | 0.2445 | 0.2285 | 0.1749 | -0.0471 | 0.0260  | - |
| 0.0490 | 1   | .   |                             |        |        |        |         |         |   |
| 1752   | O   | O   | . LYS LYS LYS A A 238 238 . | 0.2900 | 0.2044 | 0.1397 | -0.0547 | 0.0267  | - |
| 0.0457 | 1   | .   |                             |        |        |        |         |         |   |
| 1753   | N   | N   | . ILE ILE ILE A A 239 239 . | 0.2371 | 0.2158 | 0.1568 | -0.0362 | 0.0004  | - |
| 0.0653 | 1   | .   |                             |        |        |        |         |         |   |
| 1754   | CA  | CA  | . ILE ILE ILE A A 239 239 . | 0.2494 | 0.2098 | 0.1782 | -0.0248 | 0.0169  | - |
| 0.0438 | 1   | .   |                             |        |        |        |         |         |   |
| 1755   | CB  | CB  | . ILE ILE ILE A A 239 239 . | 0.2639 | 0.1830 | 0.1638 | -0.0200 | 0.0129  | - |
| 0.0632 | 1   | .   |                             |        |        |        |         |         |   |
| 1756   | CG1 | CG1 | . ILE ILE ILE A A 239 239 . | 0.3074 | 0.1977 | 0.1738 | 0.0041  | 0.0237  | - |
| 0.0249 | 1   | .   |                             |        |        |        |         |         |   |
| 1757   | CD  | CD  | . ILE ILE ILE A A 239 239 . | 0.2910 | 0.1942 | 0.1392 | -0.0133 | -0.0017 | - |
| 0.0217 | 1   | .   |                             |        |        |        |         |         |   |
| 1758   | CG2 | CG2 | . ILE ILE ILE A A 239 239 . | 0.3283 | 0.2029 | 0.2203 | -0.0093 | 0.0085  | - |
| 0.0974 | 1   | .   |                             |        |        |        |         |         |   |
| 1759   | C   | C   | . ILE ILE ILE A A 239 239 . | 0.2421 | 0.2208 | 0.1849 | -0.0305 | 0.0119  | - |
| 0.0411 | 1   | .   |                             |        |        |        |         |         |   |
| 1760   | O   | O   | . ILE ILE ILE A A 239 239 . | 0.2671 | 0.2664 | 0.2480 | -0.0691 | 0.0019  | - |
| 0.0506 | 1   | .   |                             |        |        |        |         |         |   |
| 1761   | N   | N   | . VAL VAL VAL A A 240 240 . | 0.2280 | 0.2007 | 0.1659 | -0.0391 | 0.0022  | - |
| 0.0496 | 1   | .   |                             |        |        |        |         |         |   |
| 1762   | CA  | CA  | . VAL VAL VAL A A 240 240 . | 0.2295 | 0.2205 | 0.1667 | -0.0036 | 0.0025  | - |
| 0.0672 | 1   | .   |                             |        |        |        |         |         |   |
| 1763   | CB  | CB  | . VAL VAL VAL A A 240 240 . | 0.2490 | 0.2262 | 0.1791 | -0.0162 | 0.0051  | - |
| 0.0624 | 1   | .   |                             |        |        |        |         |         |   |
| 1764   | CG1 | CG1 | . VAL VAL VAL A A 240 240 . | 0.2941 | 0.3144 | 0.1689 | 0.0292  | 0.0039  | - |
| 0.0729 | 1   | .   |                             |        |        |        |         |         |   |
| 1765   | CG2 | CG2 | . VAL VAL VAL A A 240 240 . | 0.2653 | 0.2334 | 0.1997 | -0.0575 | -0.0261 | - |
| 0.0657 | 1   | .   |                             |        |        |        |         |         |   |
| 1766   | C   | C   | . VAL VAL VAL A A 240 240 . | 0.2252 | 0.2295 | 0.1794 | -0.0087 | 0.0039  | - |
| 0.0491 | 1   | .   |                             |        |        |        |         |         |   |
| 1767   | O   | O   | . VAL VAL VAL A A 240 240 . | 0.2166 | 0.2308 | 0.1643 | -0.0220 | -0.0211 | - |
| 0.0688 | 1   | .   |                             |        |        |        |         |         |   |
| 1768   | N   | N   | . ILE ILE ILE A A 241 241 . | 0.2136 | 0.2225 | 0.2057 | -0.0306 | 0.0022  | - |
| 0.0635 | 1   | .   |                             |        |        |        |         |         |   |



|        |     |     |                             |        |        |        |         |         |   |
|--------|-----|-----|-----------------------------|--------|--------|--------|---------|---------|---|
| 1769   | CA  | CA  | . ILE ILE ILE A A 241 241 . | 0.1993 | 0.2361 | 0.2143 | -0.0448 | 0.0215  | - |
| 0.0394 | 1   | .   |                             |        |        |        |         |         |   |
| 1770   | CB  | CB  | . ILE ILE ILE A A 241 241 . | 0.1877 | 0.2525 | 0.2078 | -0.0642 | 0.0125  | - |
| 0.0447 | 1   | .   |                             |        |        |        |         |         |   |
| 1771   | CG1 | CG1 | . ILE ILE ILE A A 241 241 . | 0.1962 | 0.2645 | 0.2309 | -0.0698 | 0.0440  | - |
| 0.0358 | 1   | .   |                             |        |        |        |         |         |   |
| 1772   | CD  | CD  | . ILE ILE ILE A A 241 241 . | 0.1978 | 0.2072 | 0.2301 | -0.0961 | -0.0121 | - |
| 0.0242 | 1   | .   |                             |        |        |        |         |         |   |
| 1773   | CG2 | CG2 | . ILE ILE ILE A A 241 241 . | 0.2095 | 0.2784 | 0.2817 | -0.0396 | 0.0374  | - |
| 0.0297 | 1   | .   |                             |        |        |        |         |         |   |
| 1774   | C   | C   | . ILE ILE ILE A A 241 241 . | 0.1981 | 0.2425 | 0.1989 | -0.0331 | 0.0096  | - |
| 0.0230 | 1   | .   |                             |        |        |        |         |         |   |
| 1775   | O   | O   | . ILE ILE ILE A A 241 241 . | 0.2132 | 0.2386 | 0.2008 | -0.0536 | -0.0114 | - |
| 0.0516 | 1   | .   |                             |        |        |        |         |         |   |
| 1776   | N   | N   | . GLY GLY GLY A A 242 242 . | 0.2022 | 0.2074 | 0.1792 | -0.0421 | 0.0038  | - |
| 0.0425 | 1   | .   |                             |        |        |        |         |         |   |
| 1777   | CA  | CA  | . GLY GLY GLY A A 242 242 . | 0.2132 | 0.2469 | 0.1928 | -0.0121 | -0.0057 | - |
| 0.0337 | 1   | .   |                             |        |        |        |         |         |   |
| 1778   | C   | C   | . GLY GLY GLY A A 242 242 . | 0.2239 | 0.2440 | 0.1932 | -0.0234 | -0.0174 | - |
| 0.0422 | 1   | .   |                             |        |        |        |         |         |   |
| 1779   | O   | O   | . GLY GLY GLY A A 242 242 . | 0.2473 | 0.2678 | 0.1940 | -0.0247 | -0.0118 | - |
| 0.0460 | 1   | .   |                             |        |        |        |         |         |   |
| 1780   | N   | N   | . MET MET MET A A 243 243 . | 0.2001 | 0.2494 | 0.2196 | -0.0169 | -0.0126 | - |
| 0.0683 | 1   | .   |                             |        |        |        |         |         |   |
| 1781   | CA  | CA  | . MET MET MET A A 243 243 . | 0.2032 | 0.2731 | 0.2440 | -0.0328 | -0.0045 | - |
| 0.0511 | 1   | .   |                             |        |        |        |         |         |   |
| 1782   | CB  | CB  | . MET MET MET A A 243 243 . | 0.2137 | 0.2997 | 0.2989 | -0.0383 | 0.0084  | - |
| 0.0433 | 1   | .   |                             |        |        |        |         |         |   |
| 1783   | CG  | CG  | . MET MET MET A A 243 243 . | 0.1765 | 0.3257 | 0.3705 | -0.0895 | 0.0195  | - |
| 0.0493 | 1   | .   |                             |        |        |        |         |         |   |
| 1784   | SD  | SD  | . MET MET MET A A 243 243 . | 0.2154 | 0.4198 | 0.3904 | -0.0983 | 0.0247  | - |
| 0.0981 | 1   | .   |                             |        |        |        |         |         |   |
| 1785   | CE  | CE  | . MET MET MET A A 243 243 . | 0.2259 | 0.4660 | 0.3558 | -0.0817 | 0.0595  | - |
| 0.0889 | 1   | .   |                             |        |        |        |         |         |   |
| 1786   | C   | C   | . MET MET MET A A 243 243 . | 0.2126 | 0.2664 | 0.2440 | -0.0379 | 0.0044  | - |
| 0.0304 | 1   | .   |                             |        |        |        |         |         |   |
| 1787   | O   | O   | . MET MET MET A A 243 243 . | 0.1965 | 0.2769 | 0.2415 | -0.0268 | -0.0163 | - |
| 0.0184 | 1   | .   |                             |        |        |        |         |         |   |
| 1788   | N   | N   | . ASP ASP ASP A A 244 244 . | 0.2039 | 0.2422 | 0.2342 | -0.0342 | -0.0100 | - |
| 0.0424 | 1   | .   |                             |        |        |        |         |         |   |
| 1789   | CA  | CA  | . ASP ASP ASP A A 244 244 . | 0.1789 | 0.2532 | 0.2189 | -0.0440 | 0.0125  | - |
| 0.0505 | 1   | .   |                             |        |        |        |         |         |   |
| 1790   | CB  | CB  | . ASP ASP ASP A A 244 244 . | 0.1831 | 0.2404 | 0.2248 | -0.0450 | -0.0034 | - |
| 0.0487 | 1   | .   |                             |        |        |        |         |         |   |
| 1791   | CG  | CG  | . ASP ASP ASP A A 244 244 . | 0.1966 | 0.2598 | 0.2161 | -0.0056 | 0.0057  | - |
| 0.0433 | 1   | .   |                             |        |        |        |         |         |   |
| 1792   | OD1 | OD1 | . ASP ASP ASP A A 244 244 . | 0.1902 | 0.3010 | 0.2103 | -0.0240 | 0.0159  | - |
| 0.0095 | 1   | .   |                             |        |        |        |         |         |   |
| 1793   | OD2 | OD2 | . ASP ASP ASP A A 244 244 . | 0.2029 | 0.3003 | 0.2834 | -0.0473 | -0.0495 | - |
| 0.0574 | 1   | .   |                             |        |        |        |         |         |   |
| 1794   | C   | C   | . ASP ASP ASP A A 244 244 . | 0.2097 | 0.2509 | 0.2263 | -0.0358 | 0.0138  | - |
| 0.0520 | 1   | .   |                             |        |        |        |         |         |   |
| 1795   | O   | O   | . ASP ASP ASP A A 244 244 . | 0.2174 | 0.2668 | 0.2235 | -0.0589 | 0.0108  | - |
| 0.0407 | 1   | .   |                             |        |        |        |         |         |   |
| 1796   | N   | N   | . VAL VAL VAL A A 245 245 . | 0.1825 | 0.2729 | 0.2346 | -0.0270 | 0.0317  | - |
| 0.0708 | 1   | .   |                             |        |        |        |         |         |   |
| 1797   | CA  | CA  | . VAL VAL VAL A A 245 245 . | 0.2084 | 0.3168 | 0.2665 | -0.0316 | 0.0370  | - |
| 0.0743 | 1   | .   |                             |        |        |        |         |         |   |
| 1798   | CB  | CB  | . VAL VAL VAL A A 245 245 . | 0.1921 | 0.3114 | 0.2662 | -0.0036 | 0.0297  | - |
| 0.0657 | 1   | .   |                             |        |        |        |         |         |   |







|        |     |     |                             |        |        |        |         |         |   |
|--------|-----|-----|-----------------------------|--------|--------|--------|---------|---------|---|
| 1889   | N   | N   | . ASP ASP ASP A A 257 257 . | 0.3542 | 0.4278 | 0.3744 | -0.0246 | -0.0004 | - |
| 0.0222 | 1   | .   |                             |        |        |        |         |         |   |
| 1890   | CA  | CA  | . ASP ASP ASP A A 257 257 . | 0.3505 | 0.4164 | 0.3694 | -0.0246 | 0.0025  | - |
| 0.0207 | 1   | .   |                             |        |        |        |         |         |   |
| 1891   | CB  | CB  | . ASP ASP ASP A A 257 257 . | 0.3309 | 0.4345 | 0.3780 | -0.0118 | 0.0055  | - |
| 0.0295 | 1   | .   |                             |        |        |        |         |         |   |
| 1892   | CG  | CG  | . ASP ASP ASP A A 257 257 . | 0.3424 | 0.4181 | 0.3945 | -0.0043 | 0.0160  | - |
| 0.0332 | 1   | .   |                             |        |        |        |         |         |   |
| 1893   | OD1 | OD1 | . ASP ASP ASP A A 257 257 . | 0.3386 | 0.4321 | 0.4400 | 0.0302  | 0.1012  | - |
| 0.0391 | 1   | .   |                             |        |        |        |         |         |   |
| 1894   | OD2 | OD2 | . ASP ASP ASP A A 257 257 . | 0.2735 | 0.4915 | 0.3601 | -0.0212 | 0.0175  | - |
| 0.0087 | 1   | .   |                             |        |        |        |         |         |   |
| 1895   | C   | C   | . ASP ASP ASP A A 257 257 . | 0.3515 | 0.4161 | 0.3709 | -0.0293 | 0.0244  | - |
| 0.0258 | 1   | .   |                             |        |        |        |         |         |   |
| 1896   | O   | O   | . ASP ASP ASP A A 257 257 . | 0.3802 | 0.4057 | 0.3654 | -0.0544 | 0.0089  | - |
| 0.0348 | 1   | .   |                             |        |        |        |         |         |   |
| 1897   | N   | N   | . LEU LEU LEU A A 258 258 . | 0.3446 | 0.3995 | 0.3770 | -0.0354 | 0.0156  | - |
| 0.0224 | 1   | .   |                             |        |        |        |         |         |   |
| 1898   | CA  | CA  | . LEU LEU LEU A A 258 258 . | 0.3486 | 0.3797 | 0.3794 | -0.0308 | 0.0179  | - |
| 0.0325 | 1   | .   |                             |        |        |        |         |         |   |
| 1899   | CB  | CB  | . LEU LEU LEU A A 258 258 . | 0.3399 | 0.3794 | 0.3778 | -0.0466 | 0.0103  | - |
| 0.0381 | 1   | .   |                             |        |        |        |         |         |   |
| 1900   | CG  | CG  | . LEU LEU LEU A A 258 258 . | 0.3276 | 0.3924 | 0.3973 | -0.0609 | -0.0010 | - |
| 0.0434 | 1   | .   |                             |        |        |        |         |         |   |
| 1901   | CD1 | CD1 | . LEU LEU LEU A A 258 258 . | 0.2453 | 0.3928 | 0.4571 | -0.0605 | 0.0325  | - |
| 0.0847 | 1   | .   |                             |        |        |        |         |         |   |
| 1902   | CD2 | CD2 | . LEU LEU LEU A A 258 258 . | 0.3733 | 0.3328 | 0.4327 | -0.1010 | 0.0367  | - |
| 0.0407 | 1   | .   |                             |        |        |        |         |         |   |
| 1903   | C   | C   | . LEU LEU LEU A A 258 258 . | 0.3297 | 0.3642 | 0.3793 | -0.0387 | 0.0273  | - |
| 0.0180 | 1   | .   |                             |        |        |        |         |         |   |
| 1904   | O   | O   | . LEU LEU LEU A A 258 258 . | 0.3151 | 0.3886 | 0.3768 | -0.0389 | 0.0477  | - |
| 0.0193 | 1   | .   |                             |        |        |        |         |         |   |
| 1905   | N   | N   | . ASP ASP ASP A A 259 259 . | 0.3441 | 0.3649 | 0.3849 | -0.0534 | 0.0260  | - |
| 0.0272 | 1   | .   |                             |        |        |        |         |         |   |
| 1906   | CA  | CA  | . ASP ASP ASP A A 259 259 . | 0.3478 | 0.3880 | 0.3898 | -0.0437 | 0.0328  | - |
| 0.0080 | 1   | .   |                             |        |        |        |         |         |   |
| 1907   | CB  | CB  | . ASP ASP ASP A A 259 259 . | 0.3463 | 0.3963 | 0.3893 | -0.0401 | 0.0458  | - |
| 0.0019 | 1   | .   |                             |        |        |        |         |         |   |
| 1908   | CG  | CG  | . ASP ASP ASP A A 259 259 . | 0.3671 | 0.4443 | 0.4681 | -0.0593 | 0.0546  | - |
| 0.0223 | 1   | .   |                             |        |        |        |         |         |   |
| 1909   | OD1 | OD1 | . ASP ASP ASP A A 259 259 . | 0.2649 | 0.5320 | 0.5404 | -0.1048 | 0.1200  | - |
| 0.0174 | 1   | .   |                             |        |        |        |         |         |   |
| 1910   | OD2 | OD2 | . ASP ASP ASP A A 259 259 . | 0.4073 | 0.4917 | 0.5288 | -0.0971 | 0.0961  | - |
| 0.0760 | 1   | .   |                             |        |        |        |         |         |   |
| 1911   | C   | C   | . ASP ASP ASP A A 259 259 . | 0.3521 | 0.4070 | 0.3858 | -0.0230 | 0.0278  | - |
| 0.0083 | 1   | .   |                             |        |        |        |         |         |   |
| 1912   | O   | O   | . ASP ASP ASP A A 259 259 . | 0.3283 | 0.4330 | 0.3696 | -0.0098 | 0.0275  | - |
| 0.0102 | 1   | .   |                             |        |        |        |         |         |   |
| 1913   | N   | N   | . PHE PHE PHE A A 260 260 . | 0.3394 | 0.4042 | 0.3871 | -0.0270 | 0.0308  | - |
| 0.0192 | 1   | .   |                             |        |        |        |         |         |   |
| 1914   | CA  | CA  | . PHE PHE PHE A A 260 260 . | 0.3273 | 0.4166 | 0.3779 | -0.0049 | 0.0081  | - |
| 0.0226 | 1   | .   |                             |        |        |        |         |         |   |
| 1915   | CB  | CB  | . PHE PHE PHE A A 260 260 . | 0.2796 | 0.4329 | 0.3655 | 0.0103  | -0.0057 | - |
| 0.0105 | 1   | .   |                             |        |        |        |         |         |   |
| 1916   | CG  | CG  | . PHE PHE PHE A A 260 260 . | 0.2664 | 0.3985 | 0.3128 | 0.0270  | -0.0399 | - |
| 0.0464 | 1   | .   |                             |        |        |        |         |         |   |
| 1917   | CD1 | CD1 | . PHE PHE PHE A A 260 260 . | 0.2108 | 0.4309 | 0.3119 | 0.0199  | -0.0418 | - |
| 0.0664 | 1   | .   |                             |        |        |        |         |         |   |
| 1918   | CE1 | CE1 | . PHE PHE PHE A A 260 260 . | 0.2648 | 0.4660 | 0.2905 | 0.0070  | -0.0449 | - |
| 0.0207 | 1   | .   |                             |        |        |        |         |         |   |

|        |     |     |                             |        |        |        |         |         |   |
|--------|-----|-----|-----------------------------|--------|--------|--------|---------|---------|---|
| 1919   | CZ  | CZ  | . PHE PHE PHE A A 260 260 . | 0.3550 | 0.3801 | 0.3666 | -0.0245 | 0.0063  | - |
| 0.0634 | 1   | .   |                             |        |        |        |         |         |   |
| 1920   | CE2 | CE2 | . PHE PHE PHE A A 260 260 . | 0.2474 | 0.4131 | 0.3565 | 0.0077  | -0.0219 | - |
| 0.0405 | 1   | .   |                             |        |        |        |         |         |   |
| 1921   | CD2 | CD2 | . PHE PHE PHE A A 260 260 . | 0.2491 | 0.3621 | 0.3492 | 0.0521  | 0.0271  | - |
| 0.0849 | 1   | .   |                             |        |        |        |         |         |   |
| 1922   | C   | C   | . PHE PHE PHE A A 260 260 . | 0.3483 | 0.4315 | 0.3778 | -0.0063 | 0.0316  | - |
| 0.0114 | 1   | .   |                             |        |        |        |         |         |   |
| 1923   | O   | O   | . PHE PHE PHE A A 260 260 . | 0.3343 | 0.4341 | 0.3866 | -0.0132 | 0.0297  | - |
| 0.0335 | 1   | .   |                             |        |        |        |         |         |   |
| 1924   | N   | N   | . LYS LYS LYS A A 261 261 . | 0.3296 | 0.4300 | 0.3719 | 0.0048  | 0.0323  | - |
| 0.0077 | 1   | .   |                             |        |        |        |         |         |   |
| 1925   | CA  | CA  | . LYS LYS LYS A A 261 261 . | 0.3655 | 0.4639 | 0.4152 | -0.0032 | 0.0359  | - |
| 0.0076 | 1   | .   |                             |        |        |        |         |         |   |
| 1926   | CB  | CB  | . LYS LYS LYS A A 261 261 . | 0.3528 | 0.4654 | 0.4259 | -0.0054 | 0.0297  | - |
| 0.0193 | 1   | .   |                             |        |        |        |         |         |   |
| 1927   | CG  | CG  | . LYS LYS LYS A A 261 261 . | 0.3425 | 0.4579 | 0.4323 | 0.0108  | 0.0557  | - |
| 0.0121 | 1   | .   |                             |        |        |        |         |         |   |
| 1928   | CD  | CD  | . LYS LYS LYS A A 261 261 . | 0.3112 | 0.3396 | 0.3966 | -0.0280 | 0.1027  | - |
| 0.0351 | 1   | .   |                             |        |        |        |         |         |   |
| 1929   | CE  | CE  | . LYS LYS LYS A A 261 261 . | 0.3017 | 0.3265 | 0.3687 | 0.0381  | 0.1121  | - |
| 0.0138 | 1   | .   |                             |        |        |        |         |         |   |
| 1930   | NZ  | NZ  | . LYS LYS LYS A A 261 261 . | 0.2602 | 0.3120 | 0.2769 | 0.0002  | 0.0766  | - |
| 0.0057 | 1   | .   |                             |        |        |        |         |         |   |
| 1931   | C   | C   | . LYS LYS LYS A A 261 261 . | 0.3933 | 0.4920 | 0.4297 | -0.0071 | 0.0355  | - |
| 0.0106 | 1   | .   |                             |        |        |        |         |         |   |
| 1932   | O   | O   | . LYS LYS LYS A A 261 261 . | 0.3915 | 0.5389 | 0.4328 | -0.0108 | 0.0406  | - |
| 0.0124 | 1   | .   |                             |        |        |        |         |         |   |
| 1933   | N   | N   | . SER SER SER A A 262 262 . | 0.4084 | 0.5047 | 0.4536 | -0.0190 | 0.0352  | - |
| 0.0001 | 1   | .   |                             |        |        |        |         |         |   |
| 1934   | CA  | CA  | . SER SER SER A A 262 262 . | 0.4463 | 0.5127 | 0.4817 | -0.0162 | 0.0431  | - |
| 0.0001 | 1   | .   |                             |        |        |        |         |         |   |
| 1935   | CB  | CB  | . SER SER SER A A 262 262 . | 0.4536 | 0.5045 | 0.5042 | -0.0172 | 0.0424  | - |
| 0.0031 | 1   | .   |                             |        |        |        |         |         |   |
| 1936   | OG  | OG  | . SER SER SER A A 262 262 . | 0.4533 | 0.4735 | 0.4776 | -0.0411 | 0.0683  | - |
| 0.0120 | 1   | .   |                             |        |        |        |         |         |   |
| 1937   | C   | C   | . SER SER SER A A 262 262 . | 0.4649 | 0.5305 | 0.4935 | -0.0073 | 0.0400  | - |
| 0.0061 | 1   | .   |                             |        |        |        |         |         |   |
| 1938   | O   | O   | . SER SER SER A A 262 262 . | 0.4285 | 0.5399 | 0.4723 | -0.0347 | 0.0727  | - |
| 0.0145 | 1   | .   |                             |        |        |        |         |         |   |
| 1939   | N   | N   | . PRO PRO PRO A A 263 263 . | 0.4807 | 0.5518 | 0.5126 | -0.0009 | 0.0467  | - |
| 0.0075 | 1   | .   |                             |        |        |        |         |         |   |
| 1940   | CA  | CA  | . PRO PRO PRO A A 263 263 . | 0.4949 | 0.5498 | 0.5255 | 0.0077  | 0.0432  | - |
| 0.0031 | 1   | .   |                             |        |        |        |         |         |   |
| 1941   | CB  | CB  | . PRO PRO PRO A A 263 263 . | 0.5136 | 0.5515 | 0.5236 | 0.0109  | 0.0503  | - |
| 0.0023 | 1   | .   |                             |        |        |        |         |         |   |
| 1942   | CG  | CG  | . PRO PRO PRO A A 263 263 . | 0.5157 | 0.5712 | 0.5182 | 0.0274  | 0.0522  | - |
| 0.0058 | 1   | .   |                             |        |        |        |         |         |   |
| 1943   | CD  | CD  | . PRO PRO PRO A A 263 263 . | 0.4832 | 0.5596 | 0.5145 | 0.0114  | 0.0390  | - |
| 0.0133 | 1   | .   |                             |        |        |        |         |         |   |
| 1944   | C   | C   | . PRO PRO PRO A A 263 263 . | 0.4861 | 0.5600 | 0.5321 | 0.0053  | 0.0445  | - |
| 0.0010 | 1   | .   |                             |        |        |        |         |         |   |
| 1945   | O   | O   | . PRO PRO PRO A A 263 263 . | 0.4619 | 0.5539 | 0.5480 | 0.0069  | 0.0518  | - |
| 0.0030 | 1   | .   |                             |        |        |        |         |         |   |
| 1946   | N   | N   | . THR THR THR A A 264 264 . | 0.4960 | 0.5768 | 0.5500 | 0.0032  | 0.0442  | - |
| 0.0002 | 1   | .   |                             |        |        |        |         |         |   |
| 1947   | CA  | CA  | . THR THR THR A A 264 264 . | 0.5201 | 0.6057 | 0.5635 | 0.0029  | 0.0253  | - |
| 0.0049 | 1   | .   |                             |        |        |        |         |         |   |
| 1948   | CB  | CB  | . THR THR THR A A 264 264 . | 0.5250 | 0.6026 | 0.5660 | -0.0017 | 0.0273  | - |
| 0.0012 | 1   | .   |                             |        |        |        |         |         |   |



|        |     |     |                             |        |        |        |         |         |   |
|--------|-----|-----|-----------------------------|--------|--------|--------|---------|---------|---|
| 1979   | NE  | NE  | . ARG ARG ARG A A 268 268 . | 0.4203 | 0.6213 | 0.5116 | -0.0668 | 0.0589  | - |
| 0.0324 | 1   | .   |                             |        |        |        |         |         |   |
| 1980   | CZ  | CZ  | . ARG ARG ARG A A 268 268 . | 0.4096 | 0.6084 | 0.4995 | -0.0563 | 0.0277  | - |
| 0.0146 | 1   | .   |                             |        |        |        |         |         |   |
| 1981   | NH1 | NH1 | . ARG ARG ARG A A 268 268 . | 0.4113 | 0.6388 | 0.5117 | -0.0396 | 0.0466  | - |
| 0.0157 | 1   | .   |                             |        |        |        |         |         |   |
| 1982   | NH2 | NH2 | . ARG ARG ARG A A 268 268 . | 0.3062 | 0.5775 | 0.4903 | -0.0408 | 0.0671  | - |
| 0.0160 | 1   | .   |                             |        |        |        |         |         |   |
| 1983   | C   | C   | . ARG ARG ARG A A 268 268 . | 0.4242 | 0.5207 | 0.5069 | -0.0244 | -0.0009 | - |
| 0.0141 | 1   | .   |                             |        |        |        |         |         |   |
| 1984   | O   | O   | . ARG ARG ARG A A 268 268 . | 0.4012 | 0.5316 | 0.5258 | -0.0468 | -0.0040 | - |
| 0.0299 | 1   | .   |                             |        |        |        |         |         |   |
| 1985   | N   | N   | . TYR TYR TYR A A 269 269 . | 0.3792 | 0.5105 | 0.4946 | -0.0316 | 0.0054  | - |
| 0.0085 | 1   | .   |                             |        |        |        |         |         |   |
| 1986   | CA  | CA  | . TYR TYR TYR A A 269 269 . | 0.3805 | 0.5152 | 0.4779 | -0.0158 | 0.0037  | - |
| 0.0095 | 1   | .   |                             |        |        |        |         |         |   |
| 1987   | CB  | CB  | . TYR TYR TYR A A 269 269 . | 0.3569 | 0.5014 | 0.4753 | -0.0344 | 0.0062  | - |
| 0.0191 | 1   | .   |                             |        |        |        |         |         |   |
| 1988   | CG  | CG  | . TYR TYR TYR A A 269 269 . | 0.3609 | 0.4903 | 0.4804 | -0.0418 | 0.0148  | - |
| 0.0019 | 1   | .   |                             |        |        |        |         |         |   |
| 1989   | CD1 | CD1 | . TYR TYR TYR A A 269 269 . | 0.2446 | 0.4470 | 0.4407 | -0.0582 | -0.0063 | - |
| 0.0180 | 1   | .   |                             |        |        |        |         |         |   |
| 1990   | CE1 | CE1 | . TYR TYR TYR A A 269 269 . | 0.3745 | 0.4856 | 0.4626 | -0.0683 | 0.0259  | - |
| 0.0399 | 1   | .   |                             |        |        |        |         |         |   |
| 1991   | CZ  | CZ  | . TYR TYR TYR A A 269 269 . | 0.3441 | 0.5036 | 0.4457 | -0.0512 | 0.0314  | - |
| 0.0446 | 1   | .   |                             |        |        |        |         |         |   |
| 1992   | OH  | OH  | . TYR TYR TYR A A 269 269 . | 0.4132 | 0.5521 | 0.4465 | -0.0332 | 0.0054  | - |
| 0.0932 | 1   | .   |                             |        |        |        |         |         |   |
| 1993   | CE2 | CE2 | . TYR TYR TYR A A 269 269 . | 0.3202 | 0.5119 | 0.4600 | -0.0494 | 0.0306  | - |
| 0.0269 | 1   | .   |                             |        |        |        |         |         |   |
| 1994   | CD2 | CD2 | . TYR TYR TYR A A 269 269 . | 0.3035 | 0.4950 | 0.4832 | -0.0649 | 0.0467  | - |
| 0.0364 | 1   | .   |                             |        |        |        |         |         |   |
| 1995   | C   | C   | . TYR TYR TYR A A 269 269 . | 0.3734 | 0.5219 | 0.4711 | -0.0196 | 0.0031  | - |
| 0.0169 | 1   | .   |                             |        |        |        |         |         |   |
| 1996   | O   | O   | . TYR TYR TYR A A 269 269 . | 0.2572 | 0.5231 | 0.4475 | -0.0233 | -0.0121 | - |
| 0.0241 | 1   | .   |                             |        |        |        |         |         |   |
| 1997   | N   | N   | . ILE ILE ILE A A 270 270 . | 0.3481 | 0.4986 | 0.4657 | -0.0003 | 0.0088  | - |
| 0.0199 | 1   | .   |                             |        |        |        |         |         |   |
| 1998   | CA  | CA  | . ILE ILE ILE A A 270 270 . | 0.3607 | 0.4846 | 0.4650 | -0.0067 | -0.0091 | - |
| 0.0189 | 1   | .   |                             |        |        |        |         |         |   |
| 1999   | CB  | CB  | . ILE ILE ILE A A 270 270 . | 0.3625 | 0.4845 | 0.4731 | -0.0096 | -0.0082 | - |
| 0.0178 | 1   | .   |                             |        |        |        |         |         |   |
| 2000   | CG1 | CG1 | . ILE ILE ILE A A 270 270 . | 0.3061 | 0.4375 | 0.4805 | -0.0174 | -0.0023 | - |
| 0.0368 | 1   | .   |                             |        |        |        |         |         |   |
| 2001   | CD  | CD  | . ILE ILE ILE A A 270 270 . | 0.2464 | 0.4512 | 0.4344 | -0.0218 | 0.0022  | - |
| 0.0843 | 1   | .   |                             |        |        |        |         |         |   |
| 2002   | CG2 | CG2 | . ILE ILE ILE A A 270 270 . | 0.3644 | 0.4647 | 0.4938 | -0.0100 | -0.0137 | - |
| 0.0201 | 1   | .   |                             |        |        |        |         |         |   |
| 2003   | C   | C   | . ILE ILE ILE A A 270 270 . | 0.3868 | 0.4943 | 0.4582 | -0.0035 | -0.0062 | - |
| 0.0213 | 1   | .   |                             |        |        |        |         |         |   |
| 2004   | O   | O   | . ILE ILE ILE A A 270 270 . | 0.3942 | 0.5187 | 0.4682 | -0.0087 | -0.0009 | - |
| 0.0213 | 1   | .   |                             |        |        |        |         |         |   |
| 2005   | N   | N   | . THR THR THR A A 271 271 . | 0.3349 | 0.4922 | 0.4478 | -0.0014 | -0.0208 | - |
| 0.0159 | 1   | .   |                             |        |        |        |         |         |   |
| 2006   | CA  | CA  | . THR THR THR A A 271 271 . | 0.3398 | 0.4824 | 0.4398 | 0.0040  | -0.0147 | - |
| 0.0175 | 1   | .   |                             |        |        |        |         |         |   |
| 2007   | CB  | CB  | . THR THR THR A A 271 271 . | 0.3382 | 0.4775 | 0.4430 | 0.0008  | -0.0151 | - |
| 0.0355 | 1   | .   |                             |        |        |        |         |         |   |
| 2008   | OG1 | OG1 | . THR THR THR A A 271 271 . | 0.3344 | 0.4966 | 0.4623 | 0.0018  | -0.0258 | - |
| 0.0275 | 1   | .   |                             |        |        |        |         |         |   |





|        |     |     |                             |        |        |        |         |         |   |
|--------|-----|-----|-----------------------------|--------|--------|--------|---------|---------|---|
| 2039   | C   | C   | . LEU LEU LEU A A 275 275 . | 0.2862 | 0.3682 | 0.3672 | -0.0473 | -0.0320 | - |
| 0.0677 | 1   | .   |                             |        |        |        |         |         |   |
| 2040   | O   | O   | . LEU LEU LEU A A 275 275 . | 0.2819 | 0.3928 | 0.3502 | -0.0450 | -0.0257 | - |
| 0.0893 | 1   | .   |                             |        |        |        |         |         |   |
| 2041   | N   | N   | . GLY GLY GLY A A 276 276 . | 0.2568 | 0.3921 | 0.3528 | -0.0612 | -0.0393 | - |
| 0.0694 | 1   | .   |                             |        |        |        |         |         |   |
| 2042   | CA  | CA  | . GLY GLY GLY A A 276 276 . | 0.2588 | 0.3853 | 0.3653 | -0.0547 | -0.0410 | - |
| 0.0581 | 1   | .   |                             |        |        |        |         |         |   |
| 2043   | C   | C   | . GLY GLY GLY A A 276 276 . | 0.2619 | 0.3945 | 0.3937 | -0.0513 | -0.0373 | - |
| 0.0479 | 1   | .   |                             |        |        |        |         |         |   |
| 2044   | O   | O   | . GLY GLY GLY A A 276 276 . | 0.2690 | 0.4028 | 0.3844 | -0.0729 | -0.0584 | - |
| 0.0515 | 1   | .   |                             |        |        |        |         |         |   |
| 2045   | N   | N   | . ALA ALA ALA A A 277 277 . | 0.2552 | 0.4108 | 0.3909 | -0.0573 | -0.0319 | - |
| 0.0462 | 1   | .   |                             |        |        |        |         |         |   |
| 2046   | CA  | CA  | . ALA ALA ALA A A 277 277 . | 0.2478 | 0.4038 | 0.3880 | -0.0417 | -0.0298 | - |
| 0.0352 | 1   | .   |                             |        |        |        |         |         |   |
| 2047   | CB  | CB  | . ALA ALA ALA A A 277 277 . | 0.2362 | 0.4286 | 0.3857 | -0.0545 | -0.0366 | - |
| 0.0499 | 1   | .   |                             |        |        |        |         |         |   |
| 2048   | C   | C   | . ALA ALA ALA A A 277 277 . | 0.2680 | 0.3959 | 0.3760 | -0.0319 | -0.0264 | - |
| 0.0515 | 1   | .   |                             |        |        |        |         |         |   |
| 2049   | O   | O   | . ALA ALA ALA A A 277 277 . | 0.2735 | 0.4487 | 0.3887 | -0.0289 | -0.0479 | - |
| 0.0594 | 1   | .   |                             |        |        |        |         |         |   |
| 2050   | N   | N   | . LEU LEU LEU A A 278 278 . | 0.2849 | 0.4046 | 0.3691 | -0.0144 | -0.0003 | - |
| 0.0333 | 1   | .   |                             |        |        |        |         |         |   |
| 2051   | CA  | CA  | . LEU LEU LEU A A 278 278 . | 0.2927 | 0.3977 | 0.3528 | -0.0262 | 0.0089  | - |
| 0.0397 | 1   | .   |                             |        |        |        |         |         |   |
| 2052   | CB  | CB  | . LEU LEU LEU A A 278 278 . | 0.3028 | 0.4029 | 0.3530 | -0.0290 | 0.0130  | - |
| 0.0486 | 1   | .   |                             |        |        |        |         |         |   |
| 2053   | CG  | CG  | . LEU LEU LEU A A 278 278 . | 0.3887 | 0.3911 | 0.3977 | -0.0526 | 0.0141  | - |
| 0.0377 | 1   | .   |                             |        |        |        |         |         |   |
| 2054   | CD1 | CD1 | . LEU LEU LEU A A 278 278 . | 0.4639 | 0.4138 | 0.4065 | -0.0731 | 0.0410  | - |
| 0.0446 | 1   | .   |                             |        |        |        |         |         |   |
| 2055   | CD2 | CD2 | . LEU LEU LEU A A 278 278 . | 0.3997 | 0.4284 | 0.4221 | -0.1099 | 0.0202  | - |
| 0.0785 | 1   | .   |                             |        |        |        |         |         |   |
| 2056   | C   | C   | . LEU LEU LEU A A 278 278 . | 0.2764 | 0.3632 | 0.3451 | -0.0207 | 0.0154  | - |
| 0.0358 | 1   | .   |                             |        |        |        |         |         |   |
| 2057   | O   | O   | . LEU LEU LEU A A 278 278 . | 0.2671 | 0.3590 | 0.3089 | -0.0538 | -0.0085 | - |
| 0.0313 | 1   | .   |                             |        |        |        |         |         |   |
| 2058   | N   | N   | . TYR TYR TYR A A 279 279 . | 0.2991 | 0.3717 | 0.3318 | -0.0116 | 0.0165  | - |
| 0.0228 | 1   | .   |                             |        |        |        |         |         |   |
| 2059   | CA  | CA  | . TYR TYR TYR A A 279 279 . | 0.2770 | 0.3499 | 0.3268 | -0.0071 | -0.0071 | - |
| 0.0375 | 1   | .   |                             |        |        |        |         |         |   |
| 2060   | CB  | CB  | . TYR TYR TYR A A 279 279 . | 0.2709 | 0.3576 | 0.3328 | -0.0155 | 0.0045  | - |
| 0.0323 | 1   | .   |                             |        |        |        |         |         |   |
| 2061   | CG  | CG  | . TYR TYR TYR A A 279 279 . | 0.2089 | 0.3292 | 0.3245 | -0.0340 | -0.0159 | - |
| 0.0411 | 1   | .   |                             |        |        |        |         |         |   |
| 2062   | CD1 | CD1 | . TYR TYR TYR A A 279 279 . | 0.2322 | 0.3134 | 0.3323 | -0.0552 | -0.0035 | - |
| 0.0567 | 1   | .   |                             |        |        |        |         |         |   |
| 2063   | CE1 | CE1 | . TYR TYR TYR A A 279 279 . | 0.2465 | 0.3177 | 0.3003 | -0.0241 | -0.0064 | - |
| 0.0536 | 1   | .   |                             |        |        |        |         |         |   |
| 2064   | CZ  | CZ  | . TYR TYR TYR A A 279 279 . | 0.1993 | 0.2784 | 0.2847 | 0.0008  | -0.0058 | - |
| 0.0475 | 1   | .   |                             |        |        |        |         |         |   |
| 2065   | OH  | OH  | . TYR TYR TYR A A 279 279 . | 0.2376 | 0.3524 | 0.3175 | -0.0771 | -0.0056 | - |
| 0.0964 | 1   | .   |                             |        |        |        |         |         |   |
| 2066   | CE2 | CE2 | . TYR TYR TYR A A 279 279 . | 0.2023 | 0.3822 | 0.2904 | -0.0226 | 0.0208  | - |
| 0.0377 | 1   | .   |                             |        |        |        |         |         |   |
| 2067   | CD2 | CD2 | . TYR TYR TYR A A 279 279 . | 0.2311 | 0.2985 | 0.3245 | -0.0284 | -0.0217 | - |
| 0.0441 | 1   | .   |                             |        |        |        |         |         |   |
| 2068   | C   | C   | . TYR TYR TYR A A 279 279 . | 0.3018 | 0.3633 | 0.3083 | -0.0021 | -0.0187 | - |
| 0.0435 | 1   | .   |                             |        |        |        |         |         |   |

|        |     |     |                             |        |        |        |         |         |   |
|--------|-----|-----|-----------------------------|--------|--------|--------|---------|---------|---|
| 2069   | O   | O   | . TYR TYR TYR A A 279 279 . | 0.2708 | 0.3370 | 0.3088 | -0.0272 | -0.0457 | - |
| 0.0582 | 1   | .   |                             |        |        |        |         |         |   |
| 2070   | N   | N   | . GLN GLN GLN A A 280 280 . | 0.2913 | 0.3774 | 0.3426 | -0.0092 | -0.0265 | - |
| 0.0465 | 1   | .   |                             |        |        |        |         |         |   |
| 2071   | CA  | CA  | . GLN GLN GLN A A 280 280 . | 0.3287 | 0.3916 | 0.3321 | -0.0101 | -0.0335 | - |
| 0.0474 | 1   | .   |                             |        |        |        |         |         |   |
| 2072   | CB  | CB  | . GLN GLN GLN A A 280 280 . | 0.3525 | 0.4159 | 0.3427 | -0.0039 | -0.0269 | - |
| 0.0441 | 1   | .   |                             |        |        |        |         |         |   |
| 2073   | CG  | CG  | . GLN GLN GLN A A 280 280 . | 0.3792 | 0.3995 | 0.3510 | -0.0094 | -0.0394 | - |
| 0.0535 | 1   | .   |                             |        |        |        |         |         |   |
| 2074   | CD  | CD  | . GLN GLN GLN A A 280 280 . | 0.4523 | 0.4658 | 0.4491 | -0.0264 | -0.0222 | - |
| 0.0487 | 1   | .   |                             |        |        |        |         |         |   |
| 2075   | OE1 | OE1 | . GLN GLN GLN A A 280 280 . | 0.4487 | 0.5086 | 0.5082 | -0.0238 | -0.0258 | - |
| 0.0736 | 1   | .   |                             |        |        |        |         |         |   |
| 2076   | NE2 | NE2 | . GLN GLN GLN A A 280 280 . | 0.4412 | 0.4796 | 0.4268 | -0.0499 | -0.0961 | - |
| 0.0411 | 1   | .   |                             |        |        |        |         |         |   |
| 2077   | C   | C   | . GLN GLN GLN A A 280 280 . | 0.3384 | 0.3984 | 0.3626 | -0.0225 | -0.0282 | - |
| 0.0667 | 1   | .   |                             |        |        |        |         |         |   |
| 2078   | O   | O   | . GLN GLN GLN A A 280 280 . | 0.3062 | 0.4137 | 0.3656 | -0.0340 | -0.0526 | - |
| 0.0942 | 1   | .   |                             |        |        |        |         |         |   |
| 2079   | N   | N   | . ASP ASP ASP A A 281 281 . | 0.3362 | 0.3913 | 0.3489 | -0.0405 | -0.0252 | - |
| 0.0611 | 1   | .   |                             |        |        |        |         |         |   |
| 2080   | CA  | CA  | . ASP ASP ASP A A 281 281 . | 0.3510 | 0.4064 | 0.3742 | -0.0372 | -0.0132 | - |
| 0.0496 | 1   | .   |                             |        |        |        |         |         |   |
| 2081   | CB  | CB  | . ASP ASP ASP A A 281 281 . | 0.3522 | 0.4352 | 0.3987 | -0.0373 | -0.0001 | - |
| 0.0487 | 1   | .   |                             |        |        |        |         |         |   |
| 2082   | CG  | CG  | . ASP ASP ASP A A 281 281 . | 0.4011 | 0.5313 | 0.4654 | -0.0480 | -0.0018 | - |
| 0.0184 | 1   | .   |                             |        |        |        |         |         |   |
| 2083   | OD1 | OD1 | . ASP ASP ASP A A 281 281 . | 0.3280 | 0.6137 | 0.5073 | -0.0897 | -0.0823 | - |
| 0.0099 | 1   | .   |                             |        |        |        |         |         |   |
| 2084   | OD2 | OD2 | . ASP ASP ASP A A 281 281 . | 0.3288 | 0.6423 | 0.6126 | -0.0831 | 0.0502  | - |
| 0.0178 | 1   | .   |                             |        |        |        |         |         |   |
| 2085   | C   | C   | . ASP ASP ASP A A 281 281 . | 0.3230 | 0.3709 | 0.3563 | -0.0370 | 0.0010  | - |
| 0.0593 | 1   | .   |                             |        |        |        |         |         |   |
| 2086   | O   | O   | . ASP ASP ASP A A 281 281 . | 0.3007 | 0.3651 | 0.3554 | -0.0617 | -0.0095 | - |
| 0.0648 | 1   | .   |                             |        |        |        |         |         |   |
| 2087   | N   | N   | . PHE PHE PHE A A 282 282 . | 0.2984 | 0.3729 | 0.3427 | -0.0460 | -0.0114 | - |
| 0.0667 | 1   | .   |                             |        |        |        |         |         |   |
| 2088   | CA  | CA  | . PHE PHE PHE A A 282 282 . | 0.3065 | 0.3633 | 0.3288 | -0.0343 | 0.0045  | - |
| 0.0724 | 1   | .   |                             |        |        |        |         |         |   |
| 2089   | CB  | CB  | . PHE PHE PHE A A 282 282 . | 0.3112 | 0.3763 | 0.3168 | -0.0493 | 0.0177  | - |
| 0.0755 | 1   | .   |                             |        |        |        |         |         |   |
| 2090   | CG  | CG  | . PHE PHE PHE A A 282 282 . | 0.3446 | 0.4306 | 0.3497 | -0.0193 | 0.0422  | - |
| 0.0604 | 1   | .   |                             |        |        |        |         |         |   |
| 2091   | CD1 | CD1 | . PHE PHE PHE A A 282 282 . | 0.3362 | 0.4633 | 0.3398 | -0.0475 | 0.0509  | - |
| 0.0763 | 1   | .   |                             |        |        |        |         |         |   |
| 2092   | CE1 | CE1 | . PHE PHE PHE A A 282 282 . | 0.4198 | 0.5509 | 0.3708 | -0.0439 | 0.0754  | - |
| 0.0711 | 1   | .   |                             |        |        |        |         |         |   |
| 2093   | CZ  | CZ  | . PHE PHE PHE A A 282 282 . | 0.4426 | 0.5211 | 0.3858 | -0.0269 | 0.0670  | - |
| 0.0515 | 1   | .   |                             |        |        |        |         |         |   |
| 2094   | CE2 | CE2 | . PHE PHE PHE A A 282 282 . | 0.3529 | 0.4882 | 0.3543 | -0.0242 | 0.0675  | - |
| 0.0401 | 1   | .   |                             |        |        |        |         |         |   |
| 2095   | CD2 | CD2 | . PHE PHE PHE A A 282 282 . | 0.3658 | 0.5036 | 0.3181 | -0.0191 | 0.0794  | - |
| 0.0189 | 1   | .   |                             |        |        |        |         |         |   |
| 2096   | C   | C   | . PHE PHE PHE A A 282 282 . | 0.2759 | 0.3360 | 0.2975 | -0.0470 | -0.0039 | - |
| 0.0738 | 1   | .   |                             |        |        |        |         |         |   |
| 2097   | O   | O   | . PHE PHE PHE A A 282 282 . | 0.2965 | 0.3091 | 0.3120 | -0.0726 | 0.0147  | - |
| 0.0993 | 1   | .   |                             |        |        |        |         |         |   |
| 2098   | N   | N   | . VAL VAL VAL A A 283 283 . | 0.2795 | 0.3329 | 0.2886 | -0.0659 | -0.0195 | - |
| 0.0879 | 1   | .   |                             |        |        |        |         |         |   |

















|        |     |     |                             |        |        |        |         |         |   |
|--------|-----|-----|-----------------------------|--------|--------|--------|---------|---------|---|
| 2309   | O   | O   | . THR THR THR A A 307 307 . | 0.3563 | 0.4266 | 0.2888 | 0.0301  | -0.0843 | - |
| 0.0487 | 1   | .   |                             |        |        |        |         |         |   |
| 2310   | N   | N   | . ALA ALA ALA A A 308 308 . | 0.3698 | 0.4359 | 0.3188 | 0.0222  | -0.0678 | - |
| 0.0329 | 1   | .   |                             |        |        |        |         |         |   |
| 2311   | CA  | CA  | . ALA ALA ALA A A 308 308 . | 0.3972 | 0.4297 | 0.3148 | 0.0242  | -0.0526 | - |
| 0.0414 | 1   | .   |                             |        |        |        |         |         |   |
| 2312   | CB  | CB  | . ALA ALA ALA A A 308 308 . | 0.3599 | 0.4542 | 0.3083 | 0.0156  | -0.0906 | - |
| 0.0311 | 1   | .   |                             |        |        |        |         |         |   |
| 2313   | C   | C   | . ALA ALA ALA A A 308 308 . | 0.3876 | 0.4401 | 0.3439 | 0.0099  | -0.0437 | - |
| 0.0272 | 1   | .   |                             |        |        |        |         |         |   |
| 2314   | O   | O   | . ALA ALA ALA A A 308 308 . | 0.4093 | 0.4503 | 0.3231 | 0.0097  | -0.0441 | - |
| 0.0520 | 1   | .   |                             |        |        |        |         |         |   |
| 2315   | N   | N   | . ASN ASN ASN A A 309 309 . | 0.3994 | 0.4415 | 0.3538 | -0.0032 | -0.0403 | - |
| 0.0306 | 1   | .   |                             |        |        |        |         |         |   |
| 2316   | CA  | CA  | . ASN ASN ASN A A 309 309 . | 0.3924 | 0.4300 | 0.3738 | -0.0141 | -0.0464 | - |
| 0.0361 | 1   | .   |                             |        |        |        |         |         |   |
| 2317   | CB  | CB  | . ASN ASN ASN A A 309 309 . | 0.3995 | 0.4422 | 0.3817 | -0.0151 | -0.0547 | - |
| 0.0440 | 1   | .   |                             |        |        |        |         |         |   |
| 2318   | CG  | CG  | . ASN ASN ASN A A 309 309 . | 0.4470 | 0.4728 | 0.4504 | 0.0170  | -0.0663 | - |
| 0.0521 | 1   | .   |                             |        |        |        |         |         |   |
| 2319   | OD1 | OD1 | . ASN ASN ASN A A 309 309 . | 0.4803 | 0.4924 | 0.5179 | 0.0282  | -0.0857 | - |
| 0.1121 | 1   | .   |                             |        |        |        |         |         |   |
| 2320   | ND2 | ND2 | . ASN ASN ASN A A 309 309 . | 0.4021 | 0.5287 | 0.4470 | 0.0635  | -0.1331 | - |
| 0.0724 | 1   | .   |                             |        |        |        |         |         |   |
| 2321   | C   | C   | . ASN ASN ASN A A 309 309 . | 0.3883 | 0.4356 | 0.3938 | -0.0180 | -0.0399 | - |
| 0.0304 | 1   | .   |                             |        |        |        |         |         |   |
| 2322   | O   | O   | . ASN ASN ASN A A 309 309 . | 0.3817 | 0.4500 | 0.3945 | -0.0161 | -0.0637 | - |
| 0.0340 | 1   | .   |                             |        |        |        |         |         |   |
| 2323   | N   | N   | . VAL VAL VAL A A 310 310 . | 0.3648 | 0.4351 | 0.3460 | -0.0123 | -0.0401 | - |
| 0.0328 | 1   | .   |                             |        |        |        |         |         |   |
| 2324   | CA  | CA  | . VAL VAL VAL A A 310 310 . | 0.3692 | 0.4164 | 0.3161 | -0.0092 | -0.0316 | - |
| 0.0411 | 1   | .   |                             |        |        |        |         |         |   |
| 2325   | CB  | CB  | . VAL VAL VAL A A 310 310 . | 0.3798 | 0.4221 | 0.3017 | -0.0197 | -0.0305 | - |
| 0.0312 | 1   | .   |                             |        |        |        |         |         |   |
| 2326   | CG1 | CG1 | . VAL VAL VAL A A 310 310 . | 0.3704 | 0.4504 | 0.3681 | -0.0055 | -0.0329 | - |
| 0.0503 | 1   | .   |                             |        |        |        |         |         |   |
| 2327   | CG2 | CG2 | . VAL VAL VAL A A 310 310 . | 0.3719 | 0.3926 | 0.2870 | -0.0166 | -0.0850 | - |
| 0.0654 | 1   | .   |                             |        |        |        |         |         |   |
| 2328   | C   | C   | . VAL VAL VAL A A 310 310 . | 0.3424 | 0.3887 | 0.2885 | -0.0162 | -0.0434 | - |
| 0.0423 | 1   | .   |                             |        |        |        |         |         |   |
| 2329   | O   | O   | . VAL VAL VAL A A 310 310 . | 0.3619 | 0.4017 | 0.3002 | -0.0174 | -0.0360 | - |
| 0.0471 | 1   | .   |                             |        |        |        |         |         |   |
| 2330   | N   | N   | . GLY GLY GLY A A 311 311 . | 0.3188 | 0.3805 | 0.2688 | -0.0008 | -0.0534 | - |
| 0.0448 | 1   | .   |                             |        |        |        |         |         |   |
| 2331   | CA  | CA  | . GLY GLY GLY A A 311 311 . | 0.3107 | 0.3862 | 0.2690 | -0.0005 | -0.0652 | - |
| 0.0336 | 1   | .   |                             |        |        |        |         |         |   |
| 2332   | C   | C   | . GLY GLY GLY A A 311 311 . | 0.3028 | 0.3750 | 0.2691 | 0.0035  | -0.0579 | - |
| 0.0268 | 1   | .   |                             |        |        |        |         |         |   |
| 2333   | O   | O   | . GLY GLY GLY A A 311 311 . | 0.3057 | 0.3931 | 0.2744 | -0.0198 | -0.0671 | - |
| 0.0397 | 1   | .   |                             |        |        |        |         |         |   |
| 2334   | N   | N   | . ILE ILE ILE A A 312 312 . | 0.2762 | 0.3546 | 0.2424 | -0.0198 | -0.0583 | - |
| 0.0221 | 1   | .   |                             |        |        |        |         |         |   |
| 2335   | CA  | CA  | . ILE ILE ILE A A 312 312 . | 0.2573 | 0.3152 | 0.2087 | -0.0228 | -0.0457 | - |
| 0.0146 | 1   | .   |                             |        |        |        |         |         |   |
| 2336   | CB  | CB  | . ILE ILE ILE A A 312 312 . | 0.2495 | 0.2755 | 0.2059 | -0.0295 | -0.0381 | - |
| 0.0298 | 1   | .   |                             |        |        |        |         |         |   |
| 2337   | CG1 | CG1 | . ILE ILE ILE A A 312 312 . | 0.2135 | 0.3605 | 0.2124 | -0.0253 | -0.0533 | - |
| 0.0075 | 1   | .   |                             |        |        |        |         |         |   |
| 2338   | CD  | CD  | . ILE ILE ILE A A 312 312 . | 0.2792 | 0.3332 | 0.2188 | -0.0997 | -0.0127 | - |
| 0.0052 | 1   | .   |                             |        |        |        |         |         |   |

|        |     |     |                             |        |        |        |         |         |   |
|--------|-----|-----|-----------------------------|--------|--------|--------|---------|---------|---|
| 2339   | CG2 | CG2 | . ILE ILE ILE A A 312 312 . | 0.2433 | 0.2874 | 0.2437 | -0.0339 | -0.0108 | - |
| 0.0593 | 1   | .   |                             |        |        |        |         |         |   |
| 2340   | C   | C   | . ILE ILE ILE A A 312 312 . | 0.2252 | 0.2930 | 0.2096 | -0.0046 | -0.0243 | - |
| 0.0175 | 1   | .   |                             |        |        |        |         |         |   |
| 2341   | O   | O   | . ILE ILE ILE A A 312 312 . | 0.2283 | 0.2918 | 0.1870 | -0.0211 | -0.0323 | - |
| 0.0168 | 1   | .   |                             |        |        |        |         |         |   |
| 2342   | N   | N   | . GLN GLN GLN A A 313 313 . | 0.2273 | 0.2828 | 0.1806 | -0.0190 | -0.0209 | - |
| 0.0509 | 1   | .   |                             |        |        |        |         |         |   |
| 2343   | CA  | CA  | . GLN GLN GLN A A 313 313 . | 0.1794 | 0.2620 | 0.2026 | -0.0165 | -0.0133 | - |
| 0.0506 | 1   | .   |                             |        |        |        |         |         |   |
| 2344   | CB  | CB  | . GLN GLN GLN A A 313 313 . | 0.1941 | 0.2137 | 0.1935 | -0.0218 | -0.0302 | - |
| 0.0377 | 1   | .   |                             |        |        |        |         |         |   |
| 2345   | CG  | CG  | . GLN GLN GLN A A 313 313 . | 0.1822 | 0.2343 | 0.2024 | 0.0073  | -0.0034 | - |
| 0.0699 | 1   | .   |                             |        |        |        |         |         |   |
| 2346   | CD  | CD  | . GLN GLN GLN A A 313 313 . | 0.2059 | 0.2567 | 0.2059 | -0.0270 | -0.0468 | - |
| 0.0232 | 1   | .   |                             |        |        |        |         |         |   |
| 2347   | OE1 | OE1 | . GLN GLN GLN A A 313 313 . | 0.2031 | 0.2702 | 0.1608 | -0.0089 | -0.0448 | - |
| 0.0367 | 1   | .   |                             |        |        |        |         |         |   |
| 2348   | NE2 | NE2 | . GLN GLN GLN A A 313 313 . | 0.2237 | 0.1907 | 0.1785 | -0.0301 | -0.0547 | - |
| 0.0327 | 1   | .   |                             |        |        |        |         |         |   |
| 2349   | C   | C   | . GLN GLN GLN A A 313 313 . | 0.1955 | 0.2548 | 0.1918 | -0.0164 | -0.0432 | - |
| 0.0455 | 1   | .   |                             |        |        |        |         |         |   |
| 2350   | O   | O   | . GLN GLN GLN A A 313 313 . | 0.2196 | 0.3040 | 0.1793 | -0.0397 | -0.0469 | - |
| 0.0524 | 1   | .   |                             |        |        |        |         |         |   |
| 2351   | N   | N   | . ILE ILE ILE A A 314 314 . | 0.2114 | 0.2641 | 0.1912 | -0.0045 | -0.0511 | - |
| 0.0380 | 1   | .   |                             |        |        |        |         |         |   |
| 2352   | CA  | CA  | . ILE ILE ILE A A 314 314 . | 0.1932 | 0.2382 | 0.1905 | 0.0014  | -0.0330 | - |
| 0.0358 | 1   | .   |                             |        |        |        |         |         |   |
| 2353   | CB  | CB  | . ILE ILE ILE A A 314 314 . | 0.2382 | 0.2620 | 0.2360 | -0.0101 | -0.0275 | - |
| 0.0329 | 1   | .   |                             |        |        |        |         |         |   |
| 2354   | CG1 | CG1 | . ILE ILE ILE A A 314 314 . | 0.2636 | 0.2264 | 0.2700 | -0.0298 | -0.0172 | - |
| 0.0194 | 1   | .   |                             |        |        |        |         |         |   |
| 2355   | CD  | CD  | . ILE ILE ILE A A 314 314 . | 0.1841 | 0.2664 | 0.2510 | -0.0402 | 0.0109  | - |
| 0.0186 | 1   | .   |                             |        |        |        |         |         |   |
| 2356   | CG2 | CG2 | . ILE ILE ILE A A 314 314 . | 0.1810 | 0.2968 | 0.2311 | 0.0008  | 0.0081  |   |
| 0.0005 | 1   | .   |                             |        |        |        |         |         |   |
| 2357   | C   | C   | . ILE ILE ILE A A 314 314 . | 0.2011 | 0.2207 | 0.1846 | -0.0125 | -0.0293 | - |
| 0.0144 | 1   | .   |                             |        |        |        |         |         |   |
| 2358   | O   | O   | . ILE ILE ILE A A 314 314 . | 0.2162 | 0.2426 | 0.1326 | -0.0125 | -0.0295 | - |
| 0.0340 | 1   | .   |                             |        |        |        |         |         |   |
| 2359   | N   | N   | . VAL VAL VAL A A 315 315 . | 0.2021 | 0.2396 | 0.1760 | -0.0185 | -0.0288 | - |
| 0.0263 | 1   | .   |                             |        |        |        |         |         |   |
| 2360   | CA  | CA  | . VAL VAL VAL A A 315 315 . | 0.1885 | 0.2391 | 0.1888 | -0.0095 | -0.0339 | - |
| 0.0182 | 1   | .   |                             |        |        |        |         |         |   |
| 2361   | CB  | CB  | . VAL VAL VAL A A 315 315 . | 0.1814 | 0.1986 | 0.1502 | -0.0092 | -0.0303 | - |
| 0.0191 | 1   | .   |                             |        |        |        |         |         |   |
| 2362   | CG1 | CG1 | . VAL VAL VAL A A 315 315 . | 0.1880 | 0.2763 | 0.2024 | -0.0337 | -0.0334 | - |
| 0.0299 | 1   | .   |                             |        |        |        |         |         |   |
| 2363   | CG2 | CG2 | . VAL VAL VAL A A 315 315 . | 0.1836 | 0.2027 | 0.1648 | 0.0129  | -0.0290 | - |
| 0.0366 | 1   | .   |                             |        |        |        |         |         |   |
| 2364   | C   | C   | . VAL VAL VAL A A 315 315 . | 0.1894 | 0.2190 | 0.1530 | -0.0173 | -0.0453 | - |
| 0.0193 | 1   | .   |                             |        |        |        |         |         |   |
| 2365   | O   | O   | . VAL VAL VAL A A 315 315 . | 0.2031 | 0.2358 | 0.1953 | -0.0197 | -0.0276 | - |
| 0.0215 | 1   | .   |                             |        |        |        |         |         |   |
| 2366   | N   | N   | . GLY GLY GLY A A 316 316 . | 0.2049 | 0.2242 | 0.1619 | 0.0106  | -0.0704 | - |
| 0.0339 | 1   | .   |                             |        |        |        |         |         |   |
| 2367   | CA  | CA  | . GLY GLY GLY A A 316 316 . | 0.1661 | 0.2268 | 0.1602 | 0.0224  | -0.0383 | - |
| 0.0111 | 1   | .   |                             |        |        |        |         |         |   |
| 2368   | C   | C   | . GLY GLY GLY A A 316 316 . | 0.2007 | 0.2364 | 0.1787 | 0.0062  | -0.0175 | - |
| 0.0331 | 1   | .   |                             |        |        |        |         |         |   |



































|        |     |     |                             |        |        |        |         |         |   |
|--------|-----|-----|-----------------------------|--------|--------|--------|---------|---------|---|
| 2819   | C   | C   | . GLU GLU GLU A A 376 376 . | 0.1535 | 0.1643 | 0.1709 | -0.0102 | -0.0106 |   |
| 0.0107 | 1   | .   |                             |        |        |        |         |         |   |
| 2820   | O   | O   | . GLU GLU GLU A A 376 376 . | 0.1689 | 0.1809 | 0.1730 | -0.0058 | 0.0253  |   |
| 0.0000 | 1   | .   |                             |        |        |        |         |         |   |
| 2821   | N   | N   | . ASP ASP ASP A A 377 377 . | 0.1289 | 0.1096 | 0.1456 | -0.0117 | -0.0084 |   |
| 0.0038 | 1   | .   |                             |        |        |        |         |         |   |
| 2822   | CA  | CA  | . ASP ASP ASP A A 377 377 . | 0.1640 | 0.1435 | 0.1251 | 0.0006  | -0.0097 | - |
| 0.0094 | 1   | .   |                             |        |        |        |         |         |   |
| 2823   | CB  | CB  | . ASP ASP ASP A A 377 377 . | 0.1819 | 0.1358 | 0.1677 | -0.0149 | 0.0038  |   |
| 0.0150 | 1   | .   |                             |        |        |        |         |         |   |
| 2824   | CG  | CG  | . ASP ASP ASP A A 377 377 . | 0.2727 | 0.1881 | 0.1893 | -0.0435 | -0.0052 |   |
| 0.0048 | 1   | .   |                             |        |        |        |         |         |   |
| 2825   | OD1 | OD1 | . ASP ASP ASP A A 377 377 . | 0.3049 | 0.2955 | 0.2637 | -0.0466 | 0.0304  | - |
| 0.0178 | 1   | .   |                             |        |        |        |         |         |   |
| 2826   | OD2 | OD2 | . ASP ASP ASP A A 377 377 . | 0.2160 | 0.2492 | 0.2403 | -0.0667 | 0.0136  | - |
| 0.0344 | 1   | .   |                             |        |        |        |         |         |   |
| 2827   | C   | C   | . ASP ASP ASP A A 377 377 . | 0.1816 | 0.1700 | 0.1721 | -0.0106 | -0.0093 | - |
| 0.0077 | 1   | .   |                             |        |        |        |         |         |   |
| 2828   | O   | O   | . ASP ASP ASP A A 377 377 . | 0.1637 | 0.2070 | 0.1877 | -0.0346 | 0.0071  | - |
| 0.0104 | 1   | .   |                             |        |        |        |         |         |   |
| 2829   | N   | N   | . THR THR THR A A 378 378 . | 0.1831 | 0.1467 | 0.1148 | -0.0052 | 0.0020  | - |
| 0.0109 | 1   | .   |                             |        |        |        |         |         |   |
| 2830   | CA  | CA  | . THR THR THR A A 378 378 . | 0.1691 | 0.1248 | 0.1263 | -0.0135 | -0.0094 | - |
| 0.0019 | 1   | .   |                             |        |        |        |         |         |   |
| 2831   | CB  | CB  | . THR THR THR A A 378 378 . | 0.1634 | 0.1318 | 0.1380 | -0.0001 | 0.0071  |   |
| 0.0011 | 1   | .   |                             |        |        |        |         |         |   |
| 2832   | OG1 | OG1 | . THR THR THR A A 378 378 . | 0.1811 | 0.1581 | 0.1620 | 0.0223  | -0.0025 |   |
| 0.0280 | 1   | .   |                             |        |        |        |         |         |   |
| 2833   | CG2 | CG2 | . THR THR THR A A 378 378 . | 0.1881 | 0.1671 | 0.1482 | 0.0030  | -0.0169 |   |
| 0.0308 | 1   | .   |                             |        |        |        |         |         |   |
| 2834   | C   | C   | . THR THR THR A A 378 378 . | 0.1506 | 0.1190 | 0.1171 | -0.0021 | -0.0027 | - |
| 0.0010 | 1   | .   |                             |        |        |        |         |         |   |
| 2835   | O   | O   | . THR THR THR A A 378 378 . | 0.1852 | 0.1417 | 0.1256 | 0.0110  | -0.0049 |   |
| 0.0060 | 1   | .   |                             |        |        |        |         |         |   |
| 2836   | N   | N   | . PHE PHE PHE A A 379 379 . | 0.1371 | 0.1179 | 0.1203 | -0.0345 | -0.0014 |   |
| 0.0046 | 1   | .   |                             |        |        |        |         |         |   |
| 2837   | CA  | CA  | . PHE PHE PHE A A 379 379 . | 0.1621 | 0.1192 | 0.1342 | -0.0183 | -0.0117 | - |
| 0.0001 | 1   | .   |                             |        |        |        |         |         |   |
| 2838   | CB  | CB  | . PHE PHE PHE A A 379 379 . | 0.1711 | 0.1179 | 0.1389 | -0.0091 | -0.0069 | - |
| 0.0077 | 1   | .   |                             |        |        |        |         |         |   |
| 2839   | CG  | CG  | . PHE PHE PHE A A 379 379 . | 0.1719 | 0.1356 | 0.1483 | -0.0270 | -0.0006 |   |
| 0.0049 | 1   | .   |                             |        |        |        |         |         |   |
| 2840   | CD1 | CD1 | . PHE PHE PHE A A 379 379 . | 0.2422 | 0.1601 | 0.1107 | 0.0049  | 0.0068  |   |
| 0.0146 | 1   | .   |                             |        |        |        |         |         |   |
| 2841   | CE1 | CE1 | . PHE PHE PHE A A 379 379 . | 0.2685 | 0.1278 | 0.1827 | -0.0144 | 0.0243  |   |
| 0.0171 | 1   | .   |                             |        |        |        |         |         |   |
| 2842   | CZ  | CZ  | . PHE PHE PHE A A 379 379 . | 0.1678 | 0.1664 | 0.2004 | 0.0265  | 0.0177  |   |
| 0.0199 | 1   | .   |                             |        |        |        |         |         |   |
| 2843   | CE2 | CE2 | . PHE PHE PHE A A 379 379 . | 0.1553 | 0.1675 | 0.2016 | 0.0014  | 0.0113  |   |
| 0.0310 | 1   | .   |                             |        |        |        |         |         |   |
| 2844   | CD2 | CD2 | . PHE PHE PHE A A 379 379 . | 0.1561 | 0.2000 | 0.2014 | 0.0072  | -0.0046 |   |
| 0.0738 | 1   | .   |                             |        |        |        |         |         |   |
| 2845   | C   | C   | . PHE PHE PHE A A 379 379 . | 0.1438 | 0.1495 | 0.1333 | -0.0091 | -0.0044 | - |
| 0.0095 | 1   | .   |                             |        |        |        |         |         |   |
| 2846   | O   | O   | . PHE PHE PHE A A 379 379 . | 0.1615 | 0.1249 | 0.1112 | -0.0159 | -0.0132 | - |
| 0.0124 | 1   | .   |                             |        |        |        |         |         |   |
| 2847   | N   | N   | . ILE ILE ILE A A 380 380 . | 0.1346 | 0.1195 | 0.1277 | -0.0166 | -0.0175 | - |
| 0.0252 | 1   | .   |                             |        |        |        |         |         |   |
| 2848   | CA  | CA  | . ILE ILE ILE A A 380 380 . | 0.1314 | 0.1619 | 0.1049 | -0.0091 | -0.0009 | - |
| 0.0103 | 1   | .   |                             |        |        |        |         |         |   |













|        |     |     |                             |        |        |        |         |         |   |
|--------|-----|-----|-----------------------------|--------|--------|--------|---------|---------|---|
| 2999   | O   | O   | . GLU GLU GLU A A 401 401 . | 0.1642 | 0.1314 | 0.1003 | -0.0025 | -0.0191 | - |
| 0.0206 | 1   | .   |                             |        |        |        |         |         |   |
| 3000   | N   | N   | . ARG ARG ARG A A 402 402 . | 0.1107 | 0.0964 | 0.0752 | -0.0086 | -0.0105 | - |
| 0.0273 | 1   | .   |                             |        |        |        |         |         |   |
| 3001   | CA  | CA  | . ARG ARG ARG A A 402 402 . | 0.1263 | 0.1186 | 0.0759 | -0.0171 | -0.0071 | - |
| 0.0145 | 1   | .   |                             |        |        |        |         |         |   |
| 3002   | CB  | CB  | . ARG ARG ARG A A 402 402 . | 0.1149 | 0.1293 | 0.0766 | -0.0070 | 0.0025  | - |
| 0.0240 | 1   | .   |                             |        |        |        |         |         |   |
| 3003   | CG  | CG  | . ARG ARG ARG A A 402 402 . | 0.0996 | 0.1045 | 0.0985 | 0.0012  | 0.0224  |   |
| 0.0035 | 1   | .   |                             |        |        |        |         |         |   |
| 3004   | CD  | CD  | . ARG ARG ARG A A 402 402 . | 0.1160 | 0.0813 | 0.0745 | 0.0300  | -0.0055 | - |
| 0.0172 | 1   | .   |                             |        |        |        |         |         |   |
| 3005   | NE  | NE  | . ARG ARG ARG A A 402 402 . | 0.1249 | 0.1295 | 0.1134 | -0.0147 | -0.0173 | - |
| 0.0284 | 1   | .   |                             |        |        |        |         |         |   |
| 3006   | CZ  | CZ  | . ARG ARG ARG A A 402 402 . | 0.0797 | 0.1302 | 0.1181 | -0.0044 | 0.0068  | - |
| 0.0200 | 1   | .   |                             |        |        |        |         |         |   |
| 3007   | NH1 | NH1 | . ARG ARG ARG A A 402 402 . | 0.1434 | 0.1440 | 0.1345 | -0.0211 | 0.0006  | - |
| 0.0209 | 1   | .   |                             |        |        |        |         |         |   |
| 3008   | NH2 | NH2 | . ARG ARG ARG A A 402 402 . | 0.1634 | 0.1428 | 0.1558 | 0.0094  | 0.0353  | - |
| 0.0379 | 1   | .   |                             |        |        |        |         |         |   |
| 3009   | C   | C   | . ARG ARG ARG A A 402 402 . | 0.1340 | 0.1180 | 0.0991 | -0.0226 | -0.0055 | - |
| 0.0176 | 1   | .   |                             |        |        |        |         |         |   |
| 3010   | O   | O   | . ARG ARG ARG A A 402 402 . | 0.1478 | 0.1085 | 0.1123 | -0.0215 | -0.0014 | - |
| 0.0246 | 1   | .   |                             |        |        |        |         |         |   |
| 3011   | N   | N   | . LEU LEU LEU A A 403 403 . | 0.1170 | 0.1048 | 0.1350 | -0.0137 | -0.0184 |   |
| 0.0006 | 1   | .   |                             |        |        |        |         |         |   |
| 3012   | CA  | CA  | . LEU LEU LEU A A 403 403 . | 0.1451 | 0.1162 | 0.1248 | 0.0098  | -0.0013 |   |
| 0.0059 | 1   | .   |                             |        |        |        |         |         |   |
| 3013   | CB  | CB  | . LEU LEU LEU A A 403 403 . | 0.1476 | 0.0902 | 0.1127 | -0.0072 | 0.0052  |   |
| 0.0370 | 1   | .   |                             |        |        |        |         |         |   |
| 3014   | CG  | CG  | . LEU LEU LEU A A 403 403 . | 0.1155 | 0.1207 | 0.1428 | -0.0053 | 0.0257  | - |
| 0.0414 | 1   | .   |                             |        |        |        |         |         |   |
| 3015   | CD1 | CD1 | . LEU LEU LEU A A 403 403 . | 0.1821 | 0.1192 | 0.1160 | -0.0269 | -0.0046 | - |
| 0.0084 | 1   | .   |                             |        |        |        |         |         |   |
| 3016   | CD2 | CD2 | . LEU LEU LEU A A 403 403 . | 0.1270 | 0.1614 | 0.1601 | -0.0086 | 0.0191  | - |
| 0.0187 | 1   | .   |                             |        |        |        |         |         |   |
| 3017   | C   | C   | . LEU LEU LEU A A 403 403 . | 0.1440 | 0.1144 | 0.1230 | 0.0025  | -0.0005 |   |
| 0.0039 | 1   | .   |                             |        |        |        |         |         |   |
| 3018   | O   | O   | . LEU LEU LEU A A 403 403 . | 0.1423 | 0.1481 | 0.1275 | -0.0092 | 0.0155  |   |
| 0.0141 | 1   | .   |                             |        |        |        |         |         |   |
| 3019   | N   | N   | . ALA ALA ALA A A 404 404 . | 0.1251 | 0.1339 | 0.1127 | -0.0149 | -0.0023 | - |
| 0.0332 | 1   | .   |                             |        |        |        |         |         |   |
| 3020   | CA  | CA  | . ALA ALA ALA A A 404 404 . | 0.1446 | 0.1081 | 0.0733 | -0.0136 | 0.0274  | - |
| 0.0055 | 1   | .   |                             |        |        |        |         |         |   |
| 3021   | CB  | CB  | . ALA ALA ALA A A 404 404 . | 0.1410 | 0.1063 | 0.1239 | -0.0304 | 0.0106  | - |
| 0.0378 | 1   | .   |                             |        |        |        |         |         |   |
| 3022   | C   | C   | . ALA ALA ALA A A 404 404 . | 0.1489 | 0.1118 | 0.1135 | -0.0095 | 0.0058  | - |
| 0.0044 | 1   | .   |                             |        |        |        |         |         |   |
| 3023   | O   | O   | . ALA ALA ALA A A 404 404 . | 0.1423 | 0.1078 | 0.1230 | -0.0098 | -0.0023 |   |
| 0.0033 | 1   | .   |                             |        |        |        |         |         |   |
| 3024   | N   | N   | . LYS LYS LYS A A 405 405 . | 0.1548 | 0.1111 | 0.0847 | 0.0030  | -0.0021 |   |
| 0.0015 | 1   | .   |                             |        |        |        |         |         |   |
| 3025   | CA  | CA  | . LYS LYS LYS A A 405 405 . | 0.1449 | 0.1252 | 0.0814 | -0.0004 | 0.0013  | - |
| 0.0032 | 1   | .   |                             |        |        |        |         |         |   |
| 3026   | CB  | CB  | . LYS LYS LYS A A 405 405 . | 0.1234 | 0.1036 | 0.1250 | -0.0065 | 0.0115  | - |
| 0.0120 | 1   | .   |                             |        |        |        |         |         |   |
| 3027   | CG  | CG  | . LYS LYS LYS A A 405 405 . | 0.1553 | 0.1146 | 0.1269 | -0.0013 | 0.0196  | - |
| 0.0558 | 1   | .   |                             |        |        |        |         |         |   |
| 3028   | CD  | CD  | . LYS LYS LYS A A 405 405 . | 0.1955 | 0.0753 | 0.0921 | 0.0124  | 0.0033  | - |
| 0.0035 | 1   | .   |                             |        |        |        |         |         |   |









|        |     |     |                   |         |                                        |   |
|--------|-----|-----|-------------------|---------|----------------------------------------|---|
| 3149   | O   | O   | . ALA ALA ALA A A | 420 420 | . 0.4235 0.5044 0.3957 0.0065 0.0109   | - |
| 0.0478 | 1   | .   |                   |         |                                        |   |
| 3150   | N   | N   | . ARG ARG ARG A A | 421 421 | . 0.3580 0.4321 0.3790 -0.0054 0.0386  | - |
| 0.0466 | 1   | .   |                   |         |                                        |   |
| 3151   | CA  | CA  | . ARG ARG ARG A A | 421 421 | . 0.2862 0.3698 0.3220 -0.0132 0.0682  | - |
| 0.0372 | 1   | .   |                   |         |                                        |   |
| 3152   | CB  | CB  | . ARG ARG ARG A A | 421 421 | . 0.2875 0.3665 0.3574 0.0136 0.1010   | - |
| 0.0142 | 1   | .   |                   |         |                                        |   |
| 3153   | CG  | CG  | . ARG ARG ARG A A | 421 421 | . 0.3355 0.4362 0.3683 -0.0016 0.1434  | - |
| 0.0484 | 1   | .   |                   |         |                                        |   |
| 3154   | C   | C   | . ARG ARG ARG A A | 421 421 | . 0.2640 0.3018 0.3144 -0.0177 0.0547  | - |
| 0.0318 | 1   | .   |                   |         |                                        |   |
| 3155   | O   | O   | . ARG ARG ARG A A | 421 421 | . 0.3037 0.3050 0.2948 -0.0695 0.1021  | - |
| 0.0620 | 1   | .   |                   |         |                                        |   |
| 3156   | N   | N   | . PHE PHE PHE A A | 422 422 | . 0.2504 0.2316 0.2304 -0.0139 0.0289  | - |
| 0.0166 | 1   | .   |                   |         |                                        |   |
| 3157   | CA  | CA  | . PHE PHE PHE A A | 422 422 | . 0.2270 0.1890 0.1930 -0.0026 0.0166  | - |
| 0.0237 | 1   | .   |                   |         |                                        |   |
| 3158   | CB  | CB  | . PHE PHE PHE A A | 422 422 | . 0.2271 0.1825 0.1940 0.0089 0.0092   | - |
| 0.0116 | 1   | .   |                   |         |                                        |   |
| 3159   | CG  | CG  | . PHE PHE PHE A A | 422 422 | . 0.2115 0.1749 0.1412 -0.0071 0.0142  | - |
| 0.0365 | 1   | .   |                   |         |                                        |   |
| 3160   | CD1 | CD1 | . PHE PHE PHE A A | 422 422 | . 0.2106 0.2172 0.1177 0.0095 0.0204   | - |
| 0.0250 | 1   | .   |                   |         |                                        |   |
| 3161   | CE1 | CE1 | . PHE PHE PHE A A | 422 422 | . 0.1647 0.2151 0.1686 0.0049 -0.0155  | - |
| 0.0269 | 1   | .   |                   |         |                                        |   |
| 3162   | CZ  | CZ  | . PHE PHE PHE A A | 422 422 | . 0.2160 0.2034 0.1637 -0.0070 -0.0164 | - |
| 0.0317 | 1   | .   |                   |         |                                        |   |
| 3163   | CE2 | CE2 | . PHE PHE PHE A A | 422 422 | . 0.2212 0.2745 0.1603 -0.0427 0.0004  | - |
| 0.0494 | 1   | .   |                   |         |                                        |   |
| 3164   | CD2 | CD2 | . PHE PHE PHE A A | 422 422 | . 0.2113 0.2236 0.1894 -0.0475 0.0032  | - |
| 0.0148 | 1   | .   |                   |         |                                        |   |
| 3165   | C   | C   | . PHE PHE PHE A A | 422 422 | . 0.2459 0.1786 0.1869 0.0047 0.0086   | - |
| 0.0144 | 1   | .   |                   |         |                                        |   |
| 3166   | O   | O   | . PHE PHE PHE A A | 422 422 | . 0.2641 0.2103 0.1401 0.0136 0.0221   | - |
| 0.0142 | 1   | .   |                   |         |                                        |   |
| 3167   | N   | N   | . ALA ALA ALA A A | 423 423 | . 0.1872 0.2074 0.1583 0.0118 0.0113   |   |
| 0.0012 | 1   | .   |                   |         |                                        |   |
| 3168   | CA  | CA  | . ALA ALA ALA A A | 423 423 | . 0.2073 0.1934 0.1640 -0.0075 -0.0155 | - |
| 0.0106 | 1   | .   |                   |         |                                        |   |
| 3169   | CB  | CB  | . ALA ALA ALA A A | 423 423 | . 0.2134 0.2283 0.1535 -0.0013 -0.0027 | - |
| 0.0197 | 1   | .   |                   |         |                                        |   |
| 3170   | C   | C   | . ALA ALA ALA A A | 423 423 | . 0.2052 0.1961 0.1556 -0.0151 -0.0118 | - |
| 0.0054 | 1   | .   |                   |         |                                        |   |
| 3171   | O   | O   | . ALA ALA ALA A A | 423 423 | . 0.2235 0.2125 0.1426 -0.0157 0.0034  | - |
| 0.0118 | 1   | .   |                   |         |                                        |   |
| 3172   | N   | N   | . GLY GLY GLY A A | 424 424 | . 0.1802 0.1928 0.1333 -0.0307 -0.0087 | - |
| 0.0102 | 1   | .   |                   |         |                                        |   |
| 3173   | CA  | CA  | . GLY GLY GLY A A | 424 424 | . 0.2109 0.1742 0.1412 -0.0316 -0.0084 |   |
| 0.0032 | 1   | .   |                   |         |                                        |   |
| 3174   | C   | C   | . GLY GLY GLY A A | 424 424 | . 0.2119 0.1777 0.1180 -0.0091 0.0000  | - |
| 0.0068 | 1   | .   |                   |         |                                        |   |
| 3175   | O   | O   | . GLY GLY GLY A A | 424 424 | . 0.2078 0.1941 0.1131 -0.0067 0.0106  | - |
| 0.0211 | 1   | .   |                   |         |                                        |   |
| 3176   | N   | N   | . HIS HIS HIS A A | 425 425 | . 0.2184 0.1869 0.1312 -0.0261 -0.0055 | - |
| 0.0341 | 1   | .   |                   |         |                                        |   |
| 3177   | CA  | CA  | . HIS HIS HIS A A | 425 425 | . 0.2197 0.1645 0.1327 -0.0168 -0.0044 | - |
| 0.0369 | 1   | .   |                   |         |                                        |   |
| 3178   | CB  | CB  | . HIS HIS HIS A A | 425 425 | . 0.2505 0.1633 0.0814 -0.0196 0.0049  | - |
| 0.0532 | 1   | .   |                   |         |                                        |   |















|        |     |     |                           |        |        |        |         |         |   |
|--------|-----|-----|---------------------------|--------|--------|--------|---------|---------|---|
| 3359   | O   | O   | . ILE ILE ILE B B 10 10 . | 0.1947 | 0.1401 | 0.1834 | -0.0078 | 0.0065  | - |
| 0.0018 | 1   | .   |                           |        |        |        |         |         |   |
| 3360   | N   | N   | . LEU LEU LEU B B 11 11 . | 0.1521 | 0.1229 | 0.1277 | -0.0048 | 0.0141  | - |
| 0.0217 | 1   | .   |                           |        |        |        |         |         |   |
| 3361   | CA  | CA  | . LEU LEU LEU B B 11 11 . | 0.1594 | 0.1106 | 0.1208 | 0.0000  | 0.0049  | - |
| 0.0248 | 1   | .   |                           |        |        |        |         |         |   |
| 3362   | CB  | CB  | . LEU LEU LEU B B 11 11 . | 0.2140 | 0.1433 | 0.1072 | 0.0110  | -0.0032 | - |
| 0.0291 | 1   | .   |                           |        |        |        |         |         |   |
| 3363   | CG  | CG  | . LEU LEU LEU B B 11 11 . | 0.2305 | 0.1345 | 0.1435 | 0.0500  | 0.0180  | - |
| 0.0572 | 1   | .   |                           |        |        |        |         |         |   |
| 3364   | CD1 | CD1 | . LEU LEU LEU B B 11 11 . | 0.2445 | 0.1950 | 0.1391 | -0.0095 | -0.0172 | - |
| 0.0564 | 1   | .   |                           |        |        |        |         |         |   |
| 3365   | CD2 | CD2 | . LEU LEU LEU B B 11 11 . | 0.2789 | 0.1283 | 0.1929 | 0.0551  | 0.0206  | - |
| 0.0649 | 1   | .   |                           |        |        |        |         |         |   |
| 3366   | C   | C   | . LEU LEU LEU B B 11 11 . | 0.1509 | 0.1245 | 0.1040 | 0.0019  | 0.0060  | - |
| 0.0003 | 1   | .   |                           |        |        |        |         |         |   |
| 3367   | O   | O   | . LEU LEU LEU B B 11 11 . | 0.1776 | 0.1141 | 0.0966 | -0.0051 | 0.0265  |   |
| 0.0111 | 1   | .   |                           |        |        |        |         |         |   |
| 3368   | N   | N   | . ASP ASP ASP B B 12 12 . | 0.1670 | 0.1342 | 0.0913 | -0.0003 | 0.0121  | - |
| 0.0082 | 1   | .   |                           |        |        |        |         |         |   |
| 3369   | CA  | CA  | . ASP ASP ASP B B 12 12 . | 0.1564 | 0.1031 | 0.1104 | 0.0225  | 0.0059  | - |
| 0.0219 | 1   | .   |                           |        |        |        |         |         |   |
| 3370   | CB  | CB  | . ASP ASP ASP B B 12 12 . | 0.1754 | 0.1155 | 0.1445 | 0.0137  | 0.0332  | - |
| 0.0031 | 1   | .   |                           |        |        |        |         |         |   |
| 3371   | CG  | CG  | . ASP ASP ASP B B 12 12 . | 0.1643 | 0.1247 | 0.1716 | 0.0234  | 0.0059  | - |
| 0.0307 | 1   | .   |                           |        |        |        |         |         |   |
| 3372   | OD1 | OD1 | . ASP ASP ASP B B 12 12 . | 0.1704 | 0.1067 | 0.1638 | -0.0034 | 0.0291  | - |
| 0.0167 | 1   | .   |                           |        |        |        |         |         |   |
| 3373   | OD2 | OD2 | . ASP ASP ASP B B 12 12 . | 0.2090 | 0.1891 | 0.1691 | 0.0165  | 0.0289  |   |
| 0.0314 | 1   | .   |                           |        |        |        |         |         |   |
| 3374   | C   | C   | . ASP ASP ASP B B 12 12 . | 0.1642 | 0.0967 | 0.1146 | -0.0062 | 0.0110  | - |
| 0.0068 | 1   | .   |                           |        |        |        |         |         |   |
| 3375   | O   | O   | . ASP ASP ASP B B 12 12 . | 0.1397 | 0.1151 | 0.1122 | -0.0020 | 0.0074  | - |
| 0.0131 | 1   | .   |                           |        |        |        |         |         |   |
| 3376   | N   | N   | . SER SER SER B B 13 13 . | 0.1571 | 0.0897 | 0.0755 | 0.0022  | 0.0138  | - |
| 0.0200 | 1   | .   |                           |        |        |        |         |         |   |
| 3377   | CA  | CA  | . SER SER SER B B 13 13 . | 0.1475 | 0.1184 | 0.0884 | -0.0115 | -0.0043 | - |
| 0.0289 | 1   | .   |                           |        |        |        |         |         |   |
| 3378   | CB  | CB  | . SER SER SER B B 13 13 . | 0.1798 | 0.1217 | 0.0876 | 0.0036  | 0.0021  | - |
| 0.0190 | 1   | .   |                           |        |        |        |         |         |   |
| 3379   | OG  | OG  | . SER SER SER B B 13 13 . | 0.1749 | 0.1261 | 0.1400 | -0.0119 | -0.0076 | - |
| 0.0203 | 1   | .   |                           |        |        |        |         |         |   |
| 3380   | C   | C   | . SER SER SER B B 13 13 . | 0.1465 | 0.1261 | 0.0995 | -0.0036 | 0.0048  | - |
| 0.0040 | 1   | .   |                           |        |        |        |         |         |   |
| 3381   | O   | O   | . SER SER SER B B 13 13 . | 0.1482 | 0.1351 | 0.1311 | -0.0094 | -0.0058 | - |
| 0.0246 | 1   | .   |                           |        |        |        |         |         |   |
| 3382   | N   | N   | . ARG ARG ARG B B 14 14 . | 0.1739 | 0.1044 | 0.1252 | -0.0073 | 0.0052  | - |
| 0.0326 | 1   | .   |                           |        |        |        |         |         |   |
| 3383   | CA  | CA  | . ARG ARG ARG B B 14 14 . | 0.2008 | 0.1538 | 0.1573 | -0.0151 | 0.0067  | - |
| 0.0191 | 1   | .   |                           |        |        |        |         |         |   |
| 3384   | CB  | CB  | . ARG ARG ARG B B 14 14 . | 0.2047 | 0.1349 | 0.1465 | -0.0705 | 0.0357  |   |
| 0.0124 | 1   | .   |                           |        |        |        |         |         |   |
| 3385   | CG  | CG  | . ARG ARG ARG B B 14 14 . | 0.2437 | 0.2419 | 0.2648 | -0.0154 | 0.0531  | - |
| 0.0301 | 1   | .   |                           |        |        |        |         |         |   |
| 3386   | CD  | CD  | . ARG ARG ARG B B 14 14 . | 0.2561 | 0.3308 | 0.2868 | 0.0071  | 0.0147  |   |
| 0.0540 | 1   | .   |                           |        |        |        |         |         |   |
| 3387   | NE  | NE  | . ARG ARG ARG B B 14 14 . | 0.2860 | 0.2330 | 0.2638 | -0.0302 | -0.0243 |   |
| 0.0580 | 1   | .   |                           |        |        |        |         |         |   |
| 3388   | CZ  | CZ  | . ARG ARG ARG B B 14 14 . | 0.2490 | 0.1505 | 0.2361 | -0.0101 | 0.0041  |   |
| 0.0122 | 1   | .   |                           |        |        |        |         |         |   |





































































|        |     |     |                             |        |        |        |         |         |   |
|--------|-----|-----|-----------------------------|--------|--------|--------|---------|---------|---|
| 4289   | O   | O   | . LEU LEU LEU B B 136 136 . | 0.2646 | 0.2383 | 0.2814 | 0.0439  | -0.0555 |   |
| 0.0281 | 1   | .   |                             |        |        |        |         |         |   |
| 4290   | N   | N   | . ALA ALA ALA B B 137 137 . | 0.2479 | 0.2533 | 0.2222 | 0.0032  | -0.0155 | - |
| 0.0027 | 1   | .   |                             |        |        |        |         |         |   |
| 4291   | CA  | CA  | . ALA ALA ALA B B 137 137 . | 0.2570 | 0.2659 | 0.2466 | -0.0105 | -0.0260 |   |
| 0.0010 | 1   | .   |                             |        |        |        |         |         |   |
| 4292   | CB  | CB  | . ALA ALA ALA B B 137 137 . | 0.2331 | 0.2600 | 0.2242 | 0.0127  | 0.0003  |   |
| 0.0110 | 1   | .   |                             |        |        |        |         |         |   |
| 4293   | C   | C   | . ALA ALA ALA B B 137 137 . | 0.2844 | 0.2961 | 0.2599 | -0.0092 | -0.0312 |   |
| 0.0002 | 1   | .   |                             |        |        |        |         |         |   |
| 4294   | O   | O   | . ALA ALA ALA B B 137 137 . | 0.3304 | 0.3046 | 0.2720 | -0.0158 | -0.0380 |   |
| 0.0088 | 1   | .   |                             |        |        |        |         |         |   |
| 4295   | N   | N   | . GLY GLY GLY B B 138 138 . | 0.2966 | 0.2769 | 0.2871 | -0.0260 | -0.0614 | - |
| 0.0082 | 1   | .   |                             |        |        |        |         |         |   |
| 4296   | CA  | CA  | . GLY GLY GLY B B 138 138 . | 0.3355 | 0.3334 | 0.2665 | 0.0007  | -0.0614 | - |
| 0.0053 | 1   | .   |                             |        |        |        |         |         |   |
| 4297   | C   | C   | . GLY GLY GLY B B 138 138 . | 0.3482 | 0.3368 | 0.2840 | -0.0066 | -0.0546 | - |
| 0.0060 | 1   | .   |                             |        |        |        |         |         |   |
| 4298   | O   | O   | . GLY GLY GLY B B 138 138 . | 0.3663 | 0.3657 | 0.2758 | 0.0228  | -0.0656 | - |
| 0.0239 | 1   | .   |                             |        |        |        |         |         |   |
| 4299   | N   | N   | . ASN ASN ASN B B 139 139 . | 0.3166 | 0.3222 | 0.2834 | -0.0150 | -0.0639 |   |
| 0.0199 | 1   | .   |                             |        |        |        |         |         |   |
| 4300   | CA  | CA  | . ASN ASN ASN B B 139 139 . | 0.3540 | 0.3354 | 0.2834 | -0.0312 | -0.0442 |   |
| 0.0094 | 1   | .   |                             |        |        |        |         |         |   |
| 4301   | CB  | CB  | . ASN ASN ASN B B 139 139 . | 0.3465 | 0.3101 | 0.2822 | -0.0369 | -0.0533 |   |
| 0.0291 | 1   | .   |                             |        |        |        |         |         |   |
| 4302   | CG  | CG  | . ASN ASN ASN B B 139 139 . | 0.3193 | 0.3310 | 0.2813 | -0.0503 | -0.0771 |   |
| 0.0141 | 1   | .   |                             |        |        |        |         |         |   |
| 4303   | OD1 | OD1 | . ASN ASN ASN B B 139 139 . | 0.3998 | 0.4286 | 0.2982 | -0.0583 | -0.1086 |   |
| 0.0332 | 1   | .   |                             |        |        |        |         |         |   |
| 4304   | ND2 | ND2 | . ASN ASN ASN B B 139 139 . | 0.2765 | 0.3142 | 0.2415 | 0.0111  | -0.1048 |   |
| 0.0020 | 1   | .   |                             |        |        |        |         |         |   |
| 4305   | C   | C   | . ASN ASN ASN B B 139 139 . | 0.3740 | 0.3445 | 0.3258 | -0.0363 | -0.0413 | - |
| 0.0055 | 1   | .   |                             |        |        |        |         |         |   |
| 4306   | O   | O   | . ASN ASN ASN B B 139 139 . | 0.3799 | 0.3327 | 0.3023 | -0.0422 | -0.0372 | - |
| 0.0279 | 1   | .   |                             |        |        |        |         |         |   |
| 4307   | N   | N   | . SER SER SER B B 140 140 . | 0.4287 | 0.3860 | 0.3765 | -0.0182 | -0.0215 | - |
| 0.0112 | 1   | .   |                             |        |        |        |         |         |   |
| 4308   | CA  | CA  | . SER SER SER B B 140 140 . | 0.4728 | 0.4300 | 0.4300 | -0.0349 | -0.0176 | - |
| 0.0009 | 1   | .   |                             |        |        |        |         |         |   |
| 4309   | CB  | CB  | . SER SER SER B B 140 140 . | 0.4846 | 0.4270 | 0.4345 | -0.0455 | -0.0207 | - |
| 0.0121 | 1   | .   |                             |        |        |        |         |         |   |
| 4310   | OG  | OG  | . SER SER SER B B 140 140 . | 0.5518 | 0.4964 | 0.4644 | -0.0743 | -0.0513 | - |
| 0.0303 | 1   | .   |                             |        |        |        |         |         |   |
| 4311   | C   | C   | . SER SER SER B B 140 140 . | 0.4838 | 0.4429 | 0.4604 | -0.0240 | -0.0026 |   |
| 0.0022 | 1   | .   |                             |        |        |        |         |         |   |
| 4312   | O   | O   | . SER SER SER B B 140 140 . | 0.5451 | 0.4497 | 0.5270 | -0.0266 | 0.0132  |   |
| 0.0213 | 1   | .   |                             |        |        |        |         |         |   |
| 4313   | N   | N   | . ASP ASP ASP B B 141 141 . | 0.4685 | 0.4645 | 0.4492 | -0.0239 | -0.0170 | - |
| 0.0002 | 1   | .   |                             |        |        |        |         |         |   |
| 4314   | CA  | CA  | . ASP ASP ASP B B 141 141 . | 0.4451 | 0.4538 | 0.4122 | -0.0044 | -0.0201 | - |
| 0.0097 | 1   | .   |                             |        |        |        |         |         |   |
| 4315   | CB  | CB  | . ASP ASP ASP B B 141 141 . | 0.4641 | 0.4705 | 0.4341 | -0.0017 | -0.0059 | - |
| 0.0028 | 1   | .   |                             |        |        |        |         |         |   |
| 4316   | CG  | CG  | . ASP ASP ASP B B 141 141 . | 0.5014 | 0.4947 | 0.4112 | -0.0287 | -0.0006 | - |
| 0.0232 | 1   | .   |                             |        |        |        |         |         |   |
| 4317   | C   | C   | . ASP ASP ASP B B 141 141 . | 0.4101 | 0.4223 | 0.4109 | -0.0014 | -0.0259 | - |
| 0.0182 | 1   | .   |                             |        |        |        |         |         |   |
| 4318   | O   | O   | . ASP ASP ASP B B 141 141 . | 0.4266 | 0.4386 | 0.4281 | -0.0043 | -0.0522 | - |
| 0.0352 | 1   | .   |                             |        |        |        |         |         |   |

|        |     |     |                             |        |        |        |         |         |   |
|--------|-----|-----|-----------------------------|--------|--------|--------|---------|---------|---|
| 4319   | N   | N   | . LEU LEU LEU B B 142 142 . | 0.3595 | 0.3876 | 0.3424 | -0.0021 | -0.0351 | - |
| 0.0194 | 1   | .   |                             |        |        |        |         |         |   |
| 4320   | CA  | CA  | . LEU LEU LEU B B 142 142 . | 0.3073 | 0.3247 | 0.3093 | 0.0061  | -0.0271 | - |
| 0.0252 | 1   | .   |                             |        |        |        |         |         |   |
| 4321   | CB  | CB  | . LEU LEU LEU B B 142 142 . | 0.2934 | 0.2959 | 0.2625 | 0.0088  | -0.0181 | - |
| 0.0394 | 1   | .   |                             |        |        |        |         |         |   |
| 4322   | CG  | CG  | . LEU LEU LEU B B 142 142 . | 0.2882 | 0.2502 | 0.3231 | 0.0292  | -0.0169 | - |
| 0.0270 | 1   | .   |                             |        |        |        |         |         |   |
| 4323   | CD1 | CD1 | . LEU LEU LEU B B 142 142 . | 0.4029 | 0.3482 | 0.3122 | 0.0029  | -0.0551 | - |
| 0.0016 | 1   | .   |                             |        |        |        |         |         |   |
| 4324   | CD2 | CD2 | . LEU LEU LEU B B 142 142 . | 0.3691 | 0.2917 | 0.3063 | 0.0444  | -0.0231 | - |
| 0.0558 | 1   | .   |                             |        |        |        |         |         |   |
| 4325   | C   | C   | . LEU LEU LEU B B 142 142 . | 0.3028 | 0.3146 | 0.2797 | -0.0003 | -0.0341 | - |
| 0.0162 | 1   | .   |                             |        |        |        |         |         |   |
| 4326   | O   | O   | . LEU LEU LEU B B 142 142 . | 0.3268 | 0.3434 | 0.3403 | -0.0014 | -0.0543 | - |
| 0.0323 | 1   | .   |                             |        |        |        |         |         |   |
| 4327   | N   | N   | . ILE ILE ILE B B 143 143 . | 0.2941 | 0.2986 | 0.2038 | -0.0066 | -0.0430 | - |
| 0.0118 | 1   | .   |                             |        |        |        |         |         |   |
| 4328   | CA  | CA  | . ILE ILE ILE B B 143 143 . | 0.2524 | 0.2881 | 0.2130 | -0.0006 | -0.0480 | - |
| 0.0074 | 1   | .   |                             |        |        |        |         |         |   |
| 4329   | CB  | CB  | . ILE ILE ILE B B 143 143 . | 0.2742 | 0.3564 | 0.2066 | 0.0059  | -0.0440 | - |
| 0.0110 | 1   | .   |                             |        |        |        |         |         |   |
| 4330   | CG1 | CG1 | . ILE ILE ILE B B 143 143 . | 0.3447 | 0.3804 | 0.2859 | 0.0063  | -0.0430 | - |
| 0.0264 | 1   | .   |                             |        |        |        |         |         |   |
| 4331   | CD  | CD  | . ILE ILE ILE B B 143 143 . | 0.4445 | 0.3618 | 0.4081 | 0.0002  | -0.0349 | - |
| 0.0940 | 1   | .   |                             |        |        |        |         |         |   |
| 4332   | CG2 | CG2 | . ILE ILE ILE B B 143 143 . | 0.3204 | 0.4938 | 0.2653 | 0.0261  | -0.0529 | - |
| 0.0633 | 1   | .   |                             |        |        |        |         |         |   |
| 4333   | C   | C   | . ILE ILE ILE B B 143 143 . | 0.2403 | 0.2375 | 0.1803 | 0.0122  | -0.0397 | - |
| 0.0028 | 1   | .   |                             |        |        |        |         |         |   |
| 4334   | O   | O   | . ILE ILE ILE B B 143 143 . | 0.2469 | 0.1872 | 0.2199 | -0.0160 | -0.0538 | - |
| 0.0127 | 1   | .   |                             |        |        |        |         |         |   |
| 4335   | N   | N   | . LEU LEU LEU B B 144 144 . | 0.2040 | 0.1894 | 0.1600 | 0.0074  | -0.0384 | - |
| 0.0113 | 1   | .   |                             |        |        |        |         |         |   |
| 4336   | CA  | CA  | . LEU LEU LEU B B 144 144 . | 0.1941 | 0.1537 | 0.1533 | 0.0057  | -0.0265 | - |
| 0.0033 | 1   | .   |                             |        |        |        |         |         |   |
| 4337   | CB  | CB  | . LEU LEU LEU B B 144 144 . | 0.2331 | 0.1559 | 0.1727 | 0.0201  | -0.0151 | - |
| 0.0061 | 1   | .   |                             |        |        |        |         |         |   |
| 4338   | CG  | CG  | . LEU LEU LEU B B 144 144 . | 0.2343 | 0.1782 | 0.1732 | -0.0100 | -0.0264 | - |
| 0.0145 | 1   | .   |                             |        |        |        |         |         |   |
| 4339   | CD1 | CD1 | . LEU LEU LEU B B 144 144 . | 0.3097 | 0.1782 | 0.0765 | 0.0403  | 0.0159  | - |
| 0.0284 | 1   | .   |                             |        |        |        |         |         |   |
| 4340   | CD2 | CD2 | . LEU LEU LEU B B 144 144 . | 0.2273 | 0.2377 | 0.1904 | -0.0453 | -0.0723 | - |
| 0.0264 | 1   | .   |                             |        |        |        |         |         |   |
| 4341   | C   | C   | . LEU LEU LEU B B 144 144 . | 0.2186 | 0.1464 | 0.1264 | 0.0118  | -0.0031 | - |
| 0.0042 | 1   | .   |                             |        |        |        |         |         |   |
| 4342   | O   | O   | . LEU LEU LEU B B 144 144 . | 0.2595 | 0.1550 | 0.1429 | 0.0046  | 0.0057  | - |
| 0.0040 | 1   | .   |                             |        |        |        |         |         |   |
| 4343   | N   | N   | . PRO PRO PRO B B 145 145 . | 0.2377 | 0.1433 | 0.1126 | 0.0038  | 0.0133  | - |
| 0.0069 | 1   | .   |                             |        |        |        |         |         |   |
| 4344   | CA  | CA  | . PRO PRO PRO B B 145 145 . | 0.2065 | 0.1124 | 0.1341 | -0.0074 | 0.0264  | - |
| 0.0258 | 1   | .   |                             |        |        |        |         |         |   |
| 4345   | CB  | CB  | . PRO PRO PRO B B 145 145 . | 0.2521 | 0.1239 | 0.0940 | 0.0039  | 0.0185  | - |
| 0.0285 | 1   | .   |                             |        |        |        |         |         |   |
| 4346   | CG  | CG  | . PRO PRO PRO B B 145 145 . | 0.2370 | 0.1433 | 0.1201 | -0.0159 | 0.0501  | - |
| 0.0272 | 1   | .   |                             |        |        |        |         |         |   |
| 4347   | CD  | CD  | . PRO PRO PRO B B 145 145 . | 0.2300 | 0.1229 | 0.0828 | 0.0026  | 0.0056  | - |
| 0.0201 | 1   | .   |                             |        |        |        |         |         |   |
| 4348   | C   | C   | . PRO PRO PRO B B 145 145 . | 0.2018 | 0.1091 | 0.1307 | 0.0011  | 0.0047  | - |
| 0.0282 | 1   | .   |                             |        |        |        |         |         |   |







|        |     |     |                             |        |        |        |         |         |   |
|--------|-----|-----|-----------------------------|--------|--------|--------|---------|---------|---|
| 4409   | C   | C   | . ASN ASN ASN B B 153 153 . | 0.3022 | 0.3013 | 0.2612 | 0.0363  | -0.0471 | - |
| 0.0538 | 1   | .   |                             |        |        |        |         |         |   |
| 4410   | O   | O   | . ASN ASN ASN B B 153 153 . | 0.2787 | 0.3189 | 0.2457 | 0.0348  | -0.0652 | - |
| 0.0359 | 1   | .   |                             |        |        |        |         |         |   |
| 4411   | N   | N   | . GLY GLY GLY B B 154 154 . | 0.2629 | 0.2538 | 0.2322 | 0.0326  | -0.0816 | - |
| 0.0198 | 1   | .   |                             |        |        |        |         |         |   |
| 4412   | CA  | CA  | . GLY GLY GLY B B 154 154 . | 0.2602 | 0.2687 | 0.2397 | 0.0348  | -0.0574 | - |
| 0.0321 | 1   | .   |                             |        |        |        |         |         |   |
| 4413   | C   | C   | . GLY GLY GLY B B 154 154 . | 0.2686 | 0.2701 | 0.2230 | 0.0303  | -0.0552 | - |
| 0.0481 | 1   | .   |                             |        |        |        |         |         |   |
| 4414   | O   | O   | . GLY GLY GLY B B 154 154 . | 0.2363 | 0.3030 | 0.2164 | 0.0740  | -0.0571 | - |
| 0.0919 | 1   | .   |                             |        |        |        |         |         |   |
| 4415   | N   | N   | . GLY GLY GLY B B 155 155 . | 0.2969 | 0.2783 | 0.2377 | 0.0569  | -0.0710 | - |
| 0.0482 | 1   | .   |                             |        |        |        |         |         |   |
| 4416   | CA  | CA  | . GLY GLY GLY B B 155 155 . | 0.2932 | 0.2923 | 0.2554 | 0.0552  | -0.0367 | - |
| 0.0531 | 1   | .   |                             |        |        |        |         |         |   |
| 4417   | C   | C   | . GLY GLY GLY B B 155 155 . | 0.2889 | 0.2919 | 0.2628 | 0.0298  | -0.0247 | - |
| 0.0290 | 1   | .   |                             |        |        |        |         |         |   |
| 4418   | O   | O   | . GLY GLY GLY B B 155 155 . | 0.2985 | 0.2977 | 0.2095 | -0.0100 | -0.0321 | - |
| 0.0176 | 1   | .   |                             |        |        |        |         |         |   |
| 4419   | N   | N   | . SER SER SER B B 156 156 . | 0.2789 | 0.2659 | 0.2708 | 0.0280  | -0.0046 | - |
| 0.0249 | 1   | .   |                             |        |        |        |         |         |   |
| 4420   | CA  | CA  | . SER SER SER B B 156 156 . | 0.3228 | 0.3020 | 0.3027 | 0.0193  | 0.0034  | - |
| 0.0225 | 1   | .   |                             |        |        |        |         |         |   |
| 4421   | CB  | CB  | . SER SER SER B B 156 156 . | 0.2883 | 0.3015 | 0.3259 | 0.0295  | 0.0231  | - |
| 0.0580 | 1   | .   |                             |        |        |        |         |         |   |
| 4422   | OG  | OG  | . SER SER SER B B 156 156 . | 0.3423 | 0.2981 | 0.3568 | 0.0315  | -0.0101 | - |
| 0.0000 | 1   | .   |                             |        |        |        |         |         |   |
| 4423   | C   | C   | . SER SER SER B B 156 156 . | 0.3459 | 0.3129 | 0.3111 | 0.0010  | 0.0124  | - |
| 0.0263 | 1   | .   |                             |        |        |        |         |         |   |
| 4424   | O   | O   | . SER SER SER B B 156 156 . | 0.3897 | 0.2941 | 0.3633 | -0.0021 | 0.0205  | - |
| 0.0485 | 1   | .   |                             |        |        |        |         |         |   |
| 4425   | N   | N   | . HIS HIS HIS B B 157 157 . | 0.3194 | 0.2910 | 0.2895 | 0.0048  | 0.0258  | - |
| 0.0007 | 1   | .   |                             |        |        |        |         |         |   |
| 4426   | CA  | CA  | . HIS HIS HIS B B 157 157 . | 0.3255 | 0.3276 | 0.3162 | 0.0108  | 0.0139  | - |
| 0.0220 | 1   | .   |                             |        |        |        |         |         |   |
| 4427   | CB  | CB  | . HIS HIS HIS B B 157 157 . | 0.3040 | 0.3436 | 0.2879 | 0.0427  | 0.0437  | - |
| 0.0371 | 1   | .   |                             |        |        |        |         |         |   |
| 4428   | CG  | CG  | . HIS HIS HIS B B 157 157 . | 0.3317 | 0.3337 | 0.3802 | 0.0403  | 0.0042  | - |
| 0.0123 | 1   | .   |                             |        |        |        |         |         |   |
| 4429   | ND1 | ND1 | . HIS HIS HIS B B 157 157 . | 0.3546 | 0.3334 | 0.4115 | 0.0116  | 0.0150  | - |
| 0.0827 | 1   | .   |                             |        |        |        |         |         |   |
| 4430   | CE1 | CE1 | . HIS HIS HIS B B 157 157 . | 0.3890 | 0.3469 | 0.4388 | 0.0310  | -0.0163 | - |
| 0.0115 | 1   | .   |                             |        |        |        |         |         |   |
| 4431   | NE2 | NE2 | . HIS HIS HIS B B 157 157 . | 0.4433 | 0.3138 | 0.4303 | 0.0284  | 0.0100  | - |
| 0.0035 | 1   | .   |                             |        |        |        |         |         |   |
| 4432   | CD2 | CD2 | . HIS HIS HIS B B 157 157 . | 0.3859 | 0.3693 | 0.3678 | 0.0365  | -0.0027 | - |
| 0.0311 | 1   | .   |                             |        |        |        |         |         |   |
| 4433   | C   | C   | . HIS HIS HIS B B 157 157 . | 0.3166 | 0.3754 | 0.3236 | 0.0137  | 0.0234  | - |
| 0.0303 | 1   | .   |                             |        |        |        |         |         |   |
| 4434   | O   | O   | . HIS HIS HIS B B 157 157 . | 0.3578 | 0.4434 | 0.3512 | 0.0347  | 0.0195  | - |
| 0.0507 | 1   | .   |                             |        |        |        |         |         |   |
| 4435   | N   | N   | . ALA ALA ALA B B 158 158 . | 0.3326 | 0.3800 | 0.2960 | -0.0162 | 0.0080  | - |
| 0.0159 | 1   | .   |                             |        |        |        |         |         |   |
| 4436   | CA  | CA  | . ALA ALA ALA B B 158 158 . | 0.2419 | 0.2862 | 0.2824 | -0.0328 | -0.0203 | - |
| 0.0023 | 1   | .   |                             |        |        |        |         |         |   |
| 4437   | CB  | CB  | . ALA ALA ALA B B 158 158 . | 0.3070 | 0.3372 | 0.3041 | -0.0320 | 0.0116  | - |
| 0.0307 | 1   | .   |                             |        |        |        |         |         |   |
| 4438   | C   | C   | . ALA ALA ALA B B 158 158 . | 0.2870 | 0.3150 | 0.3126 | -0.0395 | -0.0074 | - |
| 0.0257 | 1   | .   |                             |        |        |        |         |         |   |



|        |     |     |                             |        |        |        |         |         |   |
|--------|-----|-----|-----------------------------|--------|--------|--------|---------|---------|---|
| 4469   | N   | N   | . ALA ALA ALA B B 163 163 . | 0.2421 | 0.2431 | 0.2673 | 0.0194  | -0.0801 | - |
| 0.0455 | 1   | .   |                             |        |        |        |         |         |   |
| 4470   | CA  | CA  | . ALA ALA ALA B B 163 163 . | 0.2305 | 0.2260 | 0.2444 | 0.0263  | -0.0468 | - |
| 0.0232 | 1   | .   |                             |        |        |        |         |         |   |
| 4471   | CB  | CB  | . ALA ALA ALA B B 163 163 . | 0.2340 | 0.2456 | 0.2932 | -0.0039 | -0.0617 | - |
| 0.0099 | 1   | .   |                             |        |        |        |         |         |   |
| 4472   | C   | C   | . ALA ALA ALA B B 163 163 . | 0.2129 | 0.2280 | 0.2317 | 0.0213  | -0.0417 | - |
| 0.0363 | 1   | .   |                             |        |        |        |         |         |   |
| 4473   | O   | O   | . ALA ALA ALA B B 163 163 . | 0.2680 | 0.2592 | 0.2382 | 0.0143  | -0.0410 | - |
| 0.0587 | 1   | .   |                             |        |        |        |         |         |   |
| 4474   | N   | N   | . MET MET MET B B 164 164 . | 0.2240 | 0.2248 | 0.2154 | 0.0221  | -0.0466 | - |
| 0.0227 | 1   | .   |                             |        |        |        |         |         |   |
| 4475   | CA  | CA  | . MET MET MET B B 164 164 . | 0.2124 | 0.1965 | 0.2112 | 0.0344  | -0.0124 | - |
| 0.0409 | 1   | .   |                             |        |        |        |         |         |   |
| 4476   | CB  | CB  | . MET MET MET B B 164 164 . | 0.2330 | 0.2273 | 0.1852 | 0.0225  | -0.0275 | - |
| 0.0332 | 1   | .   |                             |        |        |        |         |         |   |
| 4477   | CG  | CG  | . MET MET MET B B 164 164 . | 0.2200 | 0.2183 | 0.1696 | 0.0330  | -0.0046 | - |
| 0.0587 | 1   | .   |                             |        |        |        |         |         |   |
| 4478   | SD  | SD  | . MET MET MET B B 164 164 . | 0.2274 | 0.2253 | 0.2267 | 0.0143  | -0.0480 | - |
| 0.0555 | 1   | .   |                             |        |        |        |         |         |   |
| 4479   | CE  | CE  | . MET MET MET B B 164 164 . | 0.2273 | 0.2504 | 0.2217 | -0.0145 | -0.0822 | - |
| 0.0018 | 1   | .   |                             |        |        |        |         |         |   |
| 4480   | C   | C   | . MET MET MET B B 164 164 . | 0.2484 | 0.2017 | 0.2208 | 0.0441  | -0.0192 | - |
| 0.0447 | 1   | .   |                             |        |        |        |         |         |   |
| 4481   | O   | O   | . MET MET MET B B 164 164 . | 0.2473 | 0.2103 | 0.2306 | 0.0563  | -0.0493 | - |
| 0.0358 | 1   | .   |                             |        |        |        |         |         |   |
| 4482   | N   | N   | . GLN GLN GLN B B 165 165 . | 0.2169 | 0.1808 | 0.1825 | 0.0350  | -0.0037 | - |
| 0.0456 | 1   | .   |                             |        |        |        |         |         |   |
| 4483   | CA  | CA  | . GLN GLN GLN B B 165 165 . | 0.2295 | 0.1897 | 0.2126 | 0.0435  | -0.0066 | - |
| 0.0271 | 1   | .   |                             |        |        |        |         |         |   |
| 4484   | CB  | CB  | . GLN GLN GLN B B 165 165 . | 0.2321 | 0.2301 | 0.2102 | 0.0630  | 0.0190  | - |
| 0.0304 | 1   | .   |                             |        |        |        |         |         |   |
| 4485   | CG  | CG  | . GLN GLN GLN B B 165 165 . | 0.2054 | 0.1826 | 0.2142 | 0.0460  | 0.0288  | - |
| 0.0159 | 1   | .   |                             |        |        |        |         |         |   |
| 4486   | CD  | CD  | . GLN GLN GLN B B 165 165 . | 0.2229 | 0.2337 | 0.1935 | 0.0529  | 0.0227  | - |
| 0.0302 | 1   | .   |                             |        |        |        |         |         |   |
| 4487   | OE1 | OE1 | . GLN GLN GLN B B 165 165 . | 0.2805 | 0.2151 | 0.2196 | 0.1250  | -0.0142 | - |
| 0.0210 | 1   | .   |                             |        |        |        |         |         |   |
| 4488   | NE2 | NE2 | . GLN GLN GLN B B 165 165 . | 0.2479 | 0.2109 | 0.2695 | 0.0423  | 0.0293  | - |
| 0.0108 | 1   | .   |                             |        |        |        |         |         |   |
| 4489   | C   | C   | . GLN GLN GLN B B 165 165 . | 0.2476 | 0.1937 | 0.1840 | 0.0494  | -0.0229 | - |
| 0.0252 | 1   | .   |                             |        |        |        |         |         |   |
| 4490   | O   | O   | . GLN GLN GLN B B 165 165 . | 0.2821 | 0.2169 | 0.1952 | 0.0990  | -0.0345 | - |
| 0.0330 | 1   | .   |                             |        |        |        |         |         |   |
| 4491   | N   | N   | . GLU GLU GLU B B 166 166 . | 0.2549 | 0.1587 | 0.1658 | 0.0412  | -0.0244 | - |
| 0.0363 | 1   | .   |                             |        |        |        |         |         |   |
| 4492   | CA  | CA  | . GLU GLU GLU B B 166 166 . | 0.2339 | 0.1772 | 0.1600 | 0.0399  | -0.0146 | - |
| 0.0376 | 1   | .   |                             |        |        |        |         |         |   |
| 4493   | CB  | CB  | . GLU GLU GLU B B 166 166 . | 0.2308 | 0.2258 | 0.1802 | 0.0405  | 0.0192  | - |
| 0.0271 | 1   | .   |                             |        |        |        |         |         |   |
| 4494   | CG  | CG  | . GLU GLU GLU B B 166 166 . | 0.2509 | 0.2630 | 0.2794 | 0.0476  | 0.0000  | - |
| 0.0805 | 1   | .   |                             |        |        |        |         |         |   |
| 4495   | CD  | CD  | . GLU GLU GLU B B 166 166 . | 0.2569 | 0.2561 | 0.3002 | 0.0296  | -0.0011 | - |
| 0.0427 | 1   | .   |                             |        |        |        |         |         |   |
| 4496   | OE1 | OE1 | . GLU GLU GLU B B 166 166 . | 0.2991 | 0.1970 | 0.2489 | 0.0513  | 0.0346  | - |
| 0.0073 | 1   | .   |                             |        |        |        |         |         |   |
| 4497   | OE2 | OE2 | . GLU GLU GLU B B 166 166 . | 0.3454 | 0.3415 | 0.3688 | 0.1129  | 0.0303  | - |
| 0.0450 | 1   | .   |                             |        |        |        |         |         |   |
| 4498   | C   | C   | . GLU GLU GLU B B 166 166 . | 0.2251 | 0.1761 | 0.1282 | 0.0477  | -0.0034 | - |
| 0.0311 | 1   | .   |                             |        |        |        |         |         |   |

|        |     |     |                             |        |        |        |         |         |   |
|--------|-----|-----|-----------------------------|--------|--------|--------|---------|---------|---|
| 4499   | O   | O   | . GLU GLU GLU B B 166 166 . | 0.2003 | 0.1769 | 0.1371 | 0.0531  | -0.0211 | - |
| 0.0084 | 1   | .   |                             |        |        |        |         |         |   |
| 4500   | N   | N   | . PHE PHE PHE B B 167 167 . | 0.2079 | 0.1602 | 0.0954 | 0.0530  | -0.0045 | - |
| 0.0363 | 1   | .   |                             |        |        |        |         |         |   |
| 4501   | CA  | CA  | . PHE PHE PHE B B 167 167 . | 0.1839 | 0.1491 | 0.1189 | 0.0351  | 0.0149  | - |
| 0.0473 | 1   | .   |                             |        |        |        |         |         |   |
| 4502   | CB  | CB  | . PHE PHE PHE B B 167 167 . | 0.1900 | 0.1703 | 0.1334 | 0.0182  | -0.0056 | - |
| 0.0169 | 1   | .   |                             |        |        |        |         |         |   |
| 4503   | CG  | CG  | . PHE PHE PHE B B 167 167 . | 0.1997 | 0.1841 | 0.1679 | -0.0081 | 0.0035  | - |
| 0.0078 | 1   | .   |                             |        |        |        |         |         |   |
| 4504   | CD1 | CD1 | . PHE PHE PHE B B 167 167 . | 0.1480 | 0.1761 | 0.2728 | -0.0156 | -0.0348 | - |
| 0.0157 | 1   | .   |                             |        |        |        |         |         |   |
| 4505   | CE1 | CE1 | . PHE PHE PHE B B 167 167 . | 0.1869 | 0.1735 | 0.2282 | -0.0005 | -0.0290 | - |
| 0.0163 | 1   | .   |                             |        |        |        |         |         |   |
| 4506   | CZ  | CZ  | . PHE PHE PHE B B 167 167 . | 0.1686 | 0.2306 | 0.2338 | -0.0081 | -0.0506 | - |
| 0.0091 | 1   | .   |                             |        |        |        |         |         |   |
| 4507   | CE2 | CE2 | . PHE PHE PHE B B 167 167 . | 0.1659 | 0.1749 | 0.2438 | 0.0322  | 0.0241  | - |
| 0.0108 | 1   | .   |                             |        |        |        |         |         |   |
| 4508   | CD2 | CD2 | . PHE PHE PHE B B 167 167 . | 0.1870 | 0.2125 | 0.2132 | 0.0451  | 0.0069  | - |
| 0.0392 | 1   | .   |                             |        |        |        |         |         |   |
| 4509   | C   | C   | . PHE PHE PHE B B 167 167 . | 0.1859 | 0.1565 | 0.1238 | 0.0188  | -0.0049 | - |
| 0.0157 | 1   | .   |                             |        |        |        |         |         |   |
| 4510   | O   | O   | . PHE PHE PHE B B 167 167 . | 0.2519 | 0.1625 | 0.1629 | 0.0299  | -0.0015 | - |
| 0.0078 | 1   | .   |                             |        |        |        |         |         |   |
| 4511   | N   | N   | . MET MET MET B B 168 168 . | 0.1841 | 0.1583 | 0.1249 | 0.0333  | -0.0054 | - |
| 0.0058 | 1   | .   |                             |        |        |        |         |         |   |
| 4512   | CA  | CA  | . MET MET MET B B 168 168 . | 0.1888 | 0.1591 | 0.1190 | 0.0290  | 0.0014  | - |
| 0.0363 | 1   | .   |                             |        |        |        |         |         |   |
| 4513   | CB  | CB  | . MET MET MET B B 168 168 . | 0.1922 | 0.1714 | 0.1788 | 0.0423  | 0.0172  | - |
| 0.0261 | 1   | .   |                             |        |        |        |         |         |   |
| 4514   | CG  | CG  | . MET MET MET B B 168 168 . | 0.1928 | 0.2139 | 0.1134 | 0.0524  | -0.0077 | - |
| 0.0294 | 1   | .   |                             |        |        |        |         |         |   |
| 4515   | SD  | SD  | . MET MET MET B B 168 168 . | 0.2461 | 0.2235 | 0.3312 | 0.0609  | 0.0294  | - |
| 0.0130 | 1   | .   |                             |        |        |        |         |         |   |
| 4516   | CE  | CE  | . MET MET MET B B 168 168 . | 0.2407 | 0.2428 | 0.2282 | 0.0280  | 0.0751  | - |
| 0.0772 | 1   | .   |                             |        |        |        |         |         |   |
| 4517   | C   | C   | . MET MET MET B B 168 168 . | 0.1978 | 0.1365 | 0.1532 | 0.0316  | 0.0295  | - |
| 0.0098 | 1   | .   |                             |        |        |        |         |         |   |
| 4518   | O   | O   | . MET MET MET B B 168 168 . | 0.2163 | 0.1320 | 0.1377 | 0.0188  | 0.0270  | - |
| 0.0165 | 1   | .   |                             |        |        |        |         |         |   |
| 4519   | N   | N   | . ILE ILE ILE B B 169 169 . | 0.1978 | 0.1249 | 0.1339 | 0.0304  | 0.0195  | - |
| 0.0136 | 1   | .   |                             |        |        |        |         |         |   |
| 4520   | CA  | CA  | . ILE ILE ILE B B 169 169 . | 0.2131 | 0.1711 | 0.1593 | 0.0405  | 0.0116  | - |
| 0.0150 | 1   | .   |                             |        |        |        |         |         |   |
| 4521   | CB  | CB  | . ILE ILE ILE B B 169 169 . | 0.1827 | 0.1691 | 0.1357 | 0.0392  | 0.0231  | - |
| 0.0284 | 1   | .   |                             |        |        |        |         |         |   |
| 4522   | CG1 | CG1 | . ILE ILE ILE B B 169 169 . | 0.1944 | 0.1770 | 0.0971 | 0.0624  | 0.0062  | - |
| 0.0252 | 1   | .   |                             |        |        |        |         |         |   |
| 4523   | CD  | CD  | . ILE ILE ILE B B 169 169 . | 0.1893 | 0.1758 | 0.1990 | 0.0609  | 0.0059  | - |
| 0.0219 | 1   | .   |                             |        |        |        |         |         |   |
| 4524   | CG2 | CG2 | . ILE ILE ILE B B 169 169 . | 0.2010 | 0.1826 | 0.1570 | 0.0001  | -0.0107 | - |
| 0.0211 | 1   | .   |                             |        |        |        |         |         |   |
| 4525   | C   | C   | . ILE ILE ILE B B 169 169 . | 0.1983 | 0.1747 | 0.1486 | 0.0241  | 0.0071  | - |
| 0.0075 | 1   | .   |                             |        |        |        |         |         |   |
| 4526   | O   | O   | . ILE ILE ILE B B 169 169 . | 0.1921 | 0.1779 | 0.1282 | 0.0481  | 0.0244  | - |
| 0.0009 | 1   | .   |                             |        |        |        |         |         |   |
| 4527   | N   | N   | . LEU LEU LEU B B 170 170 . | 0.2197 | 0.1749 | 0.1347 | 0.0482  | 0.0077  | - |
| 0.0170 | 1   | .   |                             |        |        |        |         |         |   |
| 4528   | CA  | CA  | . LEU LEU LEU B B 170 170 . | 0.1920 | 0.1381 | 0.1069 | 0.0538  | 0.0133  | - |
| 0.0159 | 1   | .   |                             |        |        |        |         |         |   |





|        |     |     |                             |        |        |        |         |         |   |
|--------|-----|-----|-----------------------------|--------|--------|--------|---------|---------|---|
| 4589   | NH1 | NH1 | . ARG ARG ARG B B 178 178 . | 0.4980 | 0.2219 | 0.4640 | 0.0127  | -0.0813 | - |
| 0.0341 | 1   | .   |                             |        |        |        |         |         |   |
| 4590   | NH2 | NH2 | . ARG ARG ARG B B 178 178 . | 0.3996 | 0.1811 | 0.3858 | 0.0076  | 0.0573  |   |
| 0.0225 | 1   | .   |                             |        |        |        |         |         |   |
| 4591   | C   | C   | . ARG ARG ARG B B 178 178 . | 0.1740 | 0.1144 | 0.1206 | 0.0077  | -0.0016 | - |
| 0.0141 | 1   | .   |                             |        |        |        |         |         |   |
| 4592   | O   | O   | . ARG ARG ARG B B 178 178 . | 0.1882 | 0.0974 | 0.1558 | 0.0125  | 0.0050  | - |
| 0.0158 | 1   | .   |                             |        |        |        |         |         |   |
| 4593   | N   | N   | . ASP ASP ASP B B 179 179 . | 0.1928 | 0.1026 | 0.1216 | 0.0229  | 0.0051  | - |
| 0.0149 | 1   | .   |                             |        |        |        |         |         |   |
| 4594   | CA  | CA  | . ASP ASP ASP B B 179 179 . | 0.1740 | 0.1281 | 0.1152 | -0.0078 | 0.0012  | - |
| 0.0266 | 1   | .   |                             |        |        |        |         |         |   |
| 4595   | CB  | CB  | . ASP ASP ASP B B 179 179 . | 0.1834 | 0.1820 | 0.0985 | 0.0058  | -0.0073 | - |
| 0.0462 | 1   | .   |                             |        |        |        |         |         |   |
| 4596   | CG  | CG  | . ASP ASP ASP B B 179 179 . | 0.1762 | 0.1922 | 0.1688 | -0.0108 | 0.0187  | - |
| 0.0116 | 1   | .   |                             |        |        |        |         |         |   |
| 4597   | OD1 | OD1 | . ASP ASP ASP B B 179 179 . | 0.3791 | 0.2223 | 0.1953 | 0.0263  | 0.0118  | - |
| 0.0155 | 1   | .   |                             |        |        |        |         |         |   |
| 4598   | OD2 | OD2 | . ASP ASP ASP B B 179 179 . | 0.3044 | 0.2590 | 0.2438 | 0.1123  | 0.0274  | - |
| 0.0074 | 1   | .   |                             |        |        |        |         |         |   |
| 4599   | C   | C   | . ASP ASP ASP B B 179 179 . | 0.1746 | 0.1390 | 0.1386 | 0.0123  | 0.0002  | - |
| 0.0050 | 1   | .   |                             |        |        |        |         |         |   |
| 4600   | O   | O   | . ASP ASP ASP B B 179 179 . | 0.1877 | 0.1381 | 0.1461 | 0.0163  | -0.0003 | - |
| 0.0027 | 1   | .   |                             |        |        |        |         |         |   |
| 4601   | N   | N   | . ALA ALA ALA B B 180 180 . | 0.2059 | 0.1474 | 0.1123 | 0.0277  | -0.0198 |   |
| 0.0121 | 1   | .   |                             |        |        |        |         |         |   |
| 4602   | CA  | CA  | . ALA ALA ALA B B 180 180 . | 0.1714 | 0.1407 | 0.1217 | 0.0134  | -0.0141 |   |
| 0.0025 | 1   | .   |                             |        |        |        |         |         |   |
| 4603   | CB  | CB  | . ALA ALA ALA B B 180 180 . | 0.1753 | 0.1188 | 0.1164 | 0.0641  | -0.0199 |   |
| 0.0028 | 1   | .   |                             |        |        |        |         |         |   |
| 4604   | C   | C   | . ALA ALA ALA B B 180 180 . | 0.1725 | 0.1400 | 0.1338 | 0.0120  | 0.0020  | - |
| 0.0070 | 1   | .   |                             |        |        |        |         |         |   |
| 4605   | O   | O   | . ALA ALA ALA B B 180 180 . | 0.1814 | 0.1578 | 0.1230 | 0.0138  | 0.0039  | - |
| 0.0119 | 1   | .   |                             |        |        |        |         |         |   |
| 4606   | N   | N   | . MET MET MET B B 181 181 . | 0.1895 | 0.1224 | 0.1244 | 0.0109  | 0.0026  | - |
| 0.0036 | 1   | .   |                             |        |        |        |         |         |   |
| 4607   | CA  | CA  | . MET MET MET B B 181 181 . | 0.1765 | 0.1359 | 0.1316 | 0.0113  | 0.0061  | - |
| 0.0242 | 1   | .   |                             |        |        |        |         |         |   |
| 4608   | CB  | CB  | . MET MET MET B B 181 181 . | 0.1799 | 0.1493 | 0.1235 | 0.0106  | 0.0249  | - |
| 0.0100 | 1   | .   |                             |        |        |        |         |         |   |
| 4609   | CG  | CG  | . MET MET MET B B 181 181 . | 0.1674 | 0.1088 | 0.1678 | 0.0005  | -0.0118 | - |
| 0.0117 | 1   | .   |                             |        |        |        |         |         |   |
| 4610   | SD  | SD  | . MET MET MET B B 181 181 . | 0.2145 | 0.1600 | 0.1617 | 0.0309  | 0.0092  | - |
| 0.0195 | 1   | .   |                             |        |        |        |         |         |   |
| 4611   | CE  | CE  | . MET MET MET B B 181 181 . | 0.2567 | 0.1114 | 0.1402 | 0.0400  | -0.0379 | - |
| 0.0194 | 1   | .   |                             |        |        |        |         |         |   |
| 4612   | C   | C   | . MET MET MET B B 181 181 . | 0.1846 | 0.1334 | 0.1399 | 0.0043  | 0.0112  | - |
| 0.0135 | 1   | .   |                             |        |        |        |         |         |   |
| 4613   | O   | O   | . MET MET MET B B 181 181 . | 0.1885 | 0.1507 | 0.1620 | 0.0212  | 0.0195  | - |
| 0.0063 | 1   | .   |                             |        |        |        |         |         |   |
| 4614   | N   | N   | . ARG ARG ARG B B 182 182 . | 0.1953 | 0.1104 | 0.1281 | 0.0140  | 0.0187  | - |
| 0.0017 | 1   | .   |                             |        |        |        |         |         |   |
| 4615   | CA  | CA  | . ARG ARG ARG B B 182 182 . | 0.1816 | 0.1297 | 0.1446 | 0.0164  | 0.0118  | - |
| 0.0084 | 1   | .   |                             |        |        |        |         |         |   |
| 4616   | CB  | CB  | . ARG ARG ARG B B 182 182 . | 0.2054 | 0.1198 | 0.1713 | 0.0418  | 0.0075  | - |
| 0.0078 | 1   | .   |                             |        |        |        |         |         |   |
| 4617   | CG  | CG  | . ARG ARG ARG B B 182 182 . | 0.1972 | 0.1595 | 0.1613 | 0.0381  | -0.0033 | - |
| 0.0123 | 1   | .   |                             |        |        |        |         |         |   |
| 4618   | CD  | CD  | . ARG ARG ARG B B 182 182 . | 0.2475 | 0.1222 | 0.3712 | 0.0466  | 0.0583  | - |
| 0.0277 | 1   | .   |                             |        |        |        |         |         |   |

|        |     |     |                             |        |        |        |         |         |   |
|--------|-----|-----|-----------------------------|--------|--------|--------|---------|---------|---|
| 4619   | NE  | NE  | . ARG ARG ARG B B 182 182 . | 0.3137 | 0.3396 | 0.4282 | 0.0545  | 0.0260  | - |
| 0.0879 | 1   | .   |                             |        |        |        |         |         |   |
| 4620   | CZ  | CZ  | . ARG ARG ARG B B 182 182 . | 0.3849 | 0.3804 | 0.4095 | 0.0128  | 0.0295  | - |
| 0.0829 | 1   | .   |                             |        |        |        |         |         |   |
| 4621   | NH1 | NH1 | . ARG ARG ARG B B 182 182 . | 0.4245 | 0.4320 | 0.2940 | -0.0134 | 0.1429  | - |
| 0.1397 | 1   | .   |                             |        |        |        |         |         |   |
| 4622   | NH2 | NH2 | . ARG ARG ARG B B 182 182 . | 0.3842 | 0.4085 | 0.4495 | -0.0146 | -0.0506 | - |
| 0.0474 | 1   | .   |                             |        |        |        |         |         |   |
| 4623   | C   | C   | . ARG ARG ARG B B 182 182 . | 0.1536 | 0.1243 | 0.1544 | 0.0205  | -0.0007 | - |
| 0.0129 | 1   | .   |                             |        |        |        |         |         |   |
| 4624   | O   | O   | . ARG ARG ARG B B 182 182 . | 0.1831 | 0.1374 | 0.1406 | 0.0373  | 0.0023  | - |
| 0.0139 | 1   | .   |                             |        |        |        |         |         |   |
| 4625   | N   | N   | . LEU LEU LEU B B 183 183 . | 0.1636 | 0.1244 | 0.1228 | 0.0243  | 0.0156  | - |
| 0.0141 | 1   | .   |                             |        |        |        |         |         |   |
| 4626   | CA  | CA  | . LEU LEU LEU B B 183 183 . | 0.1768 | 0.1397 | 0.1299 | 0.0347  | 0.0054  | - |
| 0.0072 | 1   | .   |                             |        |        |        |         |         |   |
| 4627   | CB  | CB  | . LEU LEU LEU B B 183 183 . | 0.2132 | 0.1499 | 0.1185 | 0.0231  | 0.0064  | - |
| 0.0142 | 1   | .   |                             |        |        |        |         |         |   |
| 4628   | CG  | CG  | . LEU LEU LEU B B 183 183 . | 0.2333 | 0.1686 | 0.1791 | 0.0238  | 0.0016  | - |
| 0.0119 | 1   | .   |                             |        |        |        |         |         |   |
| 4629   | CD1 | CD1 | . LEU LEU LEU B B 183 183 . | 0.2772 | 0.1580 | 0.1999 | 0.0164  | 0.0381  | - |
| 0.0107 | 1   | .   |                             |        |        |        |         |         |   |
| 4630   | CD2 | CD2 | . LEU LEU LEU B B 183 183 . | 0.3319 | 0.2083 | 0.1623 | 0.0422  | -0.0329 | - |
| 0.0574 | 1   | .   |                             |        |        |        |         |         |   |
| 4631   | C   | C   | . LEU LEU LEU B B 183 183 . | 0.1532 | 0.1668 | 0.1394 | 0.0105  | 0.0101  | - |
| 0.0040 | 1   | .   |                             |        |        |        |         |         |   |
| 4632   | O   | O   | . LEU LEU LEU B B 183 183 . | 0.1657 | 0.1875 | 0.1398 | 0.0185  | 0.0004  | - |
| 0.0152 | 1   | .   |                             |        |        |        |         |         |   |
| 4633   | N   | N   | . GLY GLY GLY B B 184 184 . | 0.1759 | 0.1845 | 0.1216 | 0.0341  | 0.0174  | - |
| 0.0205 | 1   | .   |                             |        |        |        |         |         |   |
| 4634   | CA  | CA  | . GLY GLY GLY B B 184 184 . | 0.1792 | 0.1805 | 0.1733 | 0.0293  | 0.0085  | - |
| 0.0068 | 1   | .   |                             |        |        |        |         |         |   |
| 4635   | C   | C   | . GLY GLY GLY B B 184 184 . | 0.1657 | 0.1572 | 0.1596 | 0.0190  | 0.0126  | - |
| 0.0183 | 1   | .   |                             |        |        |        |         |         |   |
| 4636   | O   | O   | . GLY GLY GLY B B 184 184 . | 0.1837 | 0.1494 | 0.1596 | 0.0331  | -0.0023 | - |
| 0.0073 | 1   | .   |                             |        |        |        |         |         |   |
| 4637   | N   | N   | . ALA ALA ALA B B 185 185 . | 0.1559 | 0.1330 | 0.1331 | 0.0363  | 0.0115  | - |
| 0.0230 | 1   | .   |                             |        |        |        |         |         |   |
| 4638   | CA  | CA  | . ALA ALA ALA B B 185 185 . | 0.1703 | 0.1619 | 0.1574 | 0.0144  | 0.0133  | - |
| 0.0040 | 1   | .   |                             |        |        |        |         |         |   |
| 4639   | CB  | CB  | . ALA ALA ALA B B 185 185 . | 0.1975 | 0.1071 | 0.1514 | -0.0294 | 0.0048  | - |
| 0.0095 | 1   | .   |                             |        |        |        |         |         |   |
| 4640   | C   | C   | . ALA ALA ALA B B 185 185 . | 0.1562 | 0.1294 | 0.1505 | 0.0117  | 0.0048  | - |
| 0.0087 | 1   | .   |                             |        |        |        |         |         |   |
| 4641   | O   | O   | . ALA ALA ALA B B 185 185 . | 0.1672 | 0.1448 | 0.1531 | 0.0022  | 0.0070  | - |
| 0.0097 | 1   | .   |                             |        |        |        |         |         |   |
| 4642   | N   | N   | . GLU GLU GLU B B 186 186 . | 0.1683 | 0.1724 | 0.1235 | 0.0147  | 0.0289  | - |
| 0.0159 | 1   | .   |                             |        |        |        |         |         |   |
| 4643   | CA  | CA  | . GLU GLU GLU B B 186 186 . | 0.1793 | 0.1506 | 0.1566 | 0.0320  | 0.0049  | - |
| 0.0229 | 1   | .   |                             |        |        |        |         |         |   |
| 4644   | CB  | CB  | . GLU GLU GLU B B 186 186 . | 0.1986 | 0.1012 | 0.1568 | 0.0309  | 0.0126  | - |
| 0.0178 | 1   | .   |                             |        |        |        |         |         |   |
| 4645   | CG  | CG  | . GLU GLU GLU B B 186 186 . | 0.1869 | 0.1563 | 0.1619 | 0.0303  | 0.0383  | - |
| 0.0192 | 1   | .   |                             |        |        |        |         |         |   |
| 4646   | CD  | CD  | . GLU GLU GLU B B 186 186 . | 0.2394 | 0.2102 | 0.1977 | 0.0443  | 0.0723  | - |
| 0.0014 | 1   | .   |                             |        |        |        |         |         |   |
| 4647   | OE1 | OE1 | . GLU GLU GLU B B 186 186 . | 0.3259 | 0.2528 | 0.2098 | 0.0738  | 0.0819  | - |
| 0.0340 | 1   | .   |                             |        |        |        |         |         |   |
| 4648   | OE2 | OE2 | . GLU GLU GLU B B 186 186 . | 0.2880 | 0.1736 | 0.2241 | 0.0573  | 0.0617  | - |
| 0.0142 | 1   | .   |                             |        |        |        |         |         |   |











|        |     |     |                             |        |        |        |         |         |   |
|--------|-----|-----|-----------------------------|--------|--------|--------|---------|---------|---|
| 4769   | CA  | CA  | . ASP ASP ASP B B 202 202 . | 0.3648 | 0.4006 | 0.3945 | -0.0584 | 0.0465  | - |
| 0.0065 | 1   | .   |                             |        |        |        |         |         |   |
| 4770   | CB  | CB  | . ASP ASP ASP B B 202 202 . | 0.4199 | 0.4146 | 0.4576 | -0.0589 | 0.0165  | - |
| 0.0289 | 1   | .   |                             |        |        |        |         |         |   |
| 4771   | CG  | CG  | . ASP ASP ASP B B 202 202 . | 0.5069 | 0.5156 | 0.5579 | -0.0089 | 0.0051  | - |
| 0.0089 | 1   | .   |                             |        |        |        |         |         |   |
| 4772   | OD1 | OD1 | . ASP ASP ASP B B 202 202 . | 0.5328 | 0.5622 | 0.6944 | 0.0257  | 0.0489  | - |
| 0.0582 | 1   | .   |                             |        |        |        |         |         |   |
| 4773   | OD2 | OD2 | . ASP ASP ASP B B 202 202 . | 0.6833 | 0.5491 | 0.7899 | 0.0029  | -0.0080 | - |
| 0.0327 | 1   | .   |                             |        |        |        |         |         |   |
| 4774   | C   | C   | . ASP ASP ASP B B 202 202 . | 0.3167 | 0.3626 | 0.3618 | -0.0675 | 0.0510  | - |
| 0.0267 | 1   | .   |                             |        |        |        |         |         |   |
| 4775   | O   | O   | . ASP ASP ASP B B 202 202 . | 0.3460 | 0.3653 | 0.3805 | -0.0698 | 0.0495  | - |
| 0.0547 | 1   | .   |                             |        |        |        |         |         |   |
| 4776   | N   | N   | . ALA ALA ALA B B 203 203 . | 0.2496 | 0.3377 | 0.3179 | -0.0760 | 0.0675  | - |
| 0.0408 | 1   | .   |                             |        |        |        |         |         |   |
| 4777   | CA  | CA  | . ALA ALA ALA B B 203 203 . | 0.2361 | 0.2716 | 0.2910 | -0.0498 | 0.0691  | - |
| 0.0387 | 1   | .   |                             |        |        |        |         |         |   |
| 4778   | CB  | CB  | . ALA ALA ALA B B 203 203 . | 0.2291 | 0.2957 | 0.2999 | -0.0680 | 0.0642  | - |
| 0.0263 | 1   | .   |                             |        |        |        |         |         |   |
| 4779   | C   | C   | . ALA ALA ALA B B 203 203 . | 0.2132 | 0.2613 | 0.2644 | -0.0363 | 0.0550  | - |
| 0.0438 | 1   | .   |                             |        |        |        |         |         |   |
| 4780   | O   | O   | . ALA ALA ALA B B 203 203 . | 0.2440 | 0.2070 | 0.2811 | -0.0044 | 0.0590  | - |
| 0.0398 | 1   | .   |                             |        |        |        |         |         |   |
| 4781   | N   | N   | . THR THR THR B B 204 204 . | 0.1764 | 0.2291 | 0.2600 | -0.0113 | 0.0439  | - |
| 0.0396 | 1   | .   |                             |        |        |        |         |         |   |
| 4782   | CA  | CA  | . THR THR THR B B 204 204 . | 0.1971 | 0.2318 | 0.2455 | -0.0283 | 0.0728  | - |
| 0.0411 | 1   | .   |                             |        |        |        |         |         |   |
| 4783   | CB  | CB  | . THR THR THR B B 204 204 . | 0.2174 | 0.2636 | 0.2298 | -0.0017 | 0.0775  | - |
| 0.0133 | 1   | .   |                             |        |        |        |         |         |   |
| 4784   | OG1 | OG1 | . THR THR THR B B 204 204 . | 0.2523 | 0.2824 | 0.3251 | -0.0128 | 0.0237  | - |
| 0.0039 | 1   | .   |                             |        |        |        |         |         |   |
| 4785   | CG2 | CG2 | . THR THR THR B B 204 204 . | 0.2087 | 0.3038 | 0.3320 | -0.0200 | 0.1316  | - |
| 0.0681 | 1   | .   |                             |        |        |        |         |         |   |
| 4786   | C   | C   | . THR THR THR B B 204 204 . | 0.1742 | 0.2069 | 0.1982 | -0.0144 | 0.0530  | - |
| 0.0353 | 1   | .   |                             |        |        |        |         |         |   |
| 4787   | O   | O   | . THR THR THR B B 204 204 . | 0.2219 | 0.2413 | 0.1649 | -0.0211 | 0.0574  | - |
| 0.0345 | 1   | .   |                             |        |        |        |         |         |   |
| 4788   | N   | N   | . ASN ASN ASN B B 205 205 . | 0.1814 | 0.2227 | 0.2145 | -0.0375 | 0.0438  | - |
| 0.0529 | 1   | .   |                             |        |        |        |         |         |   |
| 4789   | CA  | CA  | . ASN ASN ASN B B 205 205 . | 0.1813 | 0.2191 | 0.2135 | -0.0263 | 0.0337  | - |
| 0.0559 | 1   | .   |                             |        |        |        |         |         |   |
| 4790   | CB  | CB  | . ASN ASN ASN B B 205 205 . | 0.2099 | 0.2363 | 0.2277 | -0.0258 | 0.0161  | - |
| 0.0592 | 1   | .   |                             |        |        |        |         |         |   |
| 4791   | CG  | CG  | . ASN ASN ASN B B 205 205 . | 0.2267 | 0.2838 | 0.2720 | -0.0451 | 0.0251  | - |
| 0.0407 | 1   | .   |                             |        |        |        |         |         |   |
| 4792   | OD1 | OD1 | . ASN ASN ASN B B 205 205 . | 0.3041 | 0.3005 | 0.2585 | -0.0223 | -0.0422 | - |
| 0.0405 | 1   | .   |                             |        |        |        |         |         |   |
| 4793   | ND2 | ND2 | . ASN ASN ASN B B 205 205 . | 0.2405 | 0.3178 | 0.3642 | -0.0491 | 0.0605  | - |
| 0.1425 | 1   | .   |                             |        |        |        |         |         |   |
| 4794   | C   | C   | . ASN ASN ASN B B 205 205 . | 0.2025 | 0.1996 | 0.2095 | -0.0416 | 0.0265  | - |
| 0.0584 | 1   | .   |                             |        |        |        |         |         |   |
| 4795   | O   | O   | . ASN ASN ASN B B 205 205 . | 0.2057 | 0.2100 | 0.2138 | -0.0661 | 0.0416  | - |
| 0.0210 | 1   | .   |                             |        |        |        |         |         |   |
| 4796   | N   | N   | . VAL VAL VAL B B 206 206 . | 0.1839 | 0.1946 | 0.2020 | -0.0423 | 0.0525  | - |
| 0.0507 | 1   | .   |                             |        |        |        |         |         |   |
| 4797   | CA  | CA  | . VAL VAL VAL B B 206 206 . | 0.1871 | 0.1666 | 0.2054 | -0.0381 | 0.0377  | - |
| 0.0346 | 1   | .   |                             |        |        |        |         |         |   |
| 4798   | CB  | CB  | . VAL VAL VAL B B 206 206 . | 0.2025 | 0.1589 | 0.2015 | -0.0342 | 0.0751  | - |
| 0.0235 | 1   | .   |                             |        |        |        |         |         |   |











|        |     |     |                             |        |        |        |         |         |   |
|--------|-----|-----|-----------------------------|--------|--------|--------|---------|---------|---|
| 4919   | CG  | CG  | . LEU LEU LEU B B 223 223 . | 0.1959 | 0.1520 | 0.1632 | 0.0384  | -0.0080 |   |
| 0.0113 | 1   | .   |                             |        |        |        |         |         |   |
| 4920   | CD1 | CD1 | . LEU LEU LEU B B 223 223 . | 0.2189 | 0.1778 | 0.2143 | -0.0051 | -0.0488 |   |
| 0.0497 | 1   | .   |                             |        |        |        |         |         |   |
| 4921   | CD2 | CD2 | . LEU LEU LEU B B 223 223 . | 0.1728 | 0.2396 | 0.2186 | 0.0427  | -0.0144 |   |
| 0.0127 | 1   | .   |                             |        |        |        |         |         |   |
| 4922   | C   | C   | . LEU LEU LEU B B 223 223 . | 0.2078 | 0.2009 | 0.1689 | 0.0364  | -0.0164 | - |
| 0.0072 | 1   | .   |                             |        |        |        |         |         |   |
| 4923   | O   | O   | . LEU LEU LEU B B 223 223 . | 0.2287 | 0.2258 | 0.1609 | 0.0153  | -0.0045 | - |
| 0.0152 | 1   | .   |                             |        |        |        |         |         |   |
| 4924   | N   | N   | . GLU GLU GLU B B 224 224 . | 0.2122 | 0.2114 | 0.1555 | 0.0297  | 0.0145  | - |
| 0.0171 | 1   | .   |                             |        |        |        |         |         |   |
| 4925   | CA  | CA  | . GLU GLU GLU B B 224 224 . | 0.2258 | 0.2199 | 0.2054 | 0.0349  | 0.0135  | - |
| 0.0046 | 1   | .   |                             |        |        |        |         |         |   |
| 4926   | CB  | CB  | . GLU GLU GLU B B 224 224 . | 0.2441 | 0.2465 | 0.2549 | 0.0284  | 0.0294  | - |
| 0.0058 | 1   | .   |                             |        |        |        |         |         |   |
| 4927   | CG  | CG  | . GLU GLU GLU B B 224 224 . | 0.3376 | 0.3549 | 0.3648 | 0.0286  | 0.0824  | - |
| 0.0158 | 1   | .   |                             |        |        |        |         |         |   |
| 4928   | CD  | CD  | . GLU GLU GLU B B 224 224 . | 0.5203 | 0.4814 | 0.4405 | -0.0078 | 0.1291  | - |
| 0.0206 | 1   | .   |                             |        |        |        |         |         |   |
| 4929   | OE1 | OE1 | . GLU GLU GLU B B 224 224 . | 0.5564 | 0.5089 | 0.5766 | -0.0943 | 0.1445  | - |
| 0.0488 | 1   | .   |                             |        |        |        |         |         |   |
| 4930   | OE2 | OE2 | . GLU GLU GLU B B 224 224 . | 0.6052 | 0.5773 | 0.5700 | 0.0606  | 0.1300  |   |
| 0.0510 | 1   | .   |                             |        |        |        |         |         |   |
| 4931   | C   | C   | . GLU GLU GLU B B 224 224 . | 0.2534 | 0.2262 | 0.2051 | 0.0209  | 0.0184  | - |
| 0.0018 | 1   | .   |                             |        |        |        |         |         |   |
| 4932   | O   | O   | . GLU GLU GLU B B 224 224 . | 0.2387 | 0.2275 | 0.2018 | 0.0306  | 0.0376  | - |
| 0.0007 | 1   | .   |                             |        |        |        |         |         |   |
| 4933   | N   | N   | . LEU LEU LEU B B 225 225 . | 0.2204 | 0.2303 | 0.1955 | 0.0294  | 0.0097  |   |
| 0.0114 | 1   | .   |                             |        |        |        |         |         |   |
| 4934   | CA  | CA  | . LEU LEU LEU B B 225 225 . | 0.1873 | 0.2165 | 0.1662 | 0.0276  | 0.0123  | - |
| 0.0058 | 1   | .   |                             |        |        |        |         |         |   |
| 4935   | CB  | CB  | . LEU LEU LEU B B 225 225 . | 0.2293 | 0.2247 | 0.1776 | 0.0172  | -0.0038 | - |
| 0.0421 | 1   | .   |                             |        |        |        |         |         |   |
| 4936   | CG  | CG  | . LEU LEU LEU B B 225 225 . | 0.1902 | 0.2327 | 0.2326 | 0.0370  | -0.0096 | - |
| 0.0043 | 1   | .   |                             |        |        |        |         |         |   |
| 4937   | CD1 | CD1 | . LEU LEU LEU B B 225 225 . | 0.3022 | 0.2274 | 0.1616 | 0.0507  | -0.0094 | - |
| 0.0010 | 1   | .   |                             |        |        |        |         |         |   |
| 4938   | CD2 | CD2 | . LEU LEU LEU B B 225 225 . | 0.1874 | 0.3159 | 0.2406 | 0.0825  | -0.0045 |   |
| 0.0134 | 1   | .   |                             |        |        |        |         |         |   |
| 4939   | C   | C   | . LEU LEU LEU B B 225 225 . | 0.2023 | 0.1759 | 0.1504 | 0.0313  | 0.0010  | - |
| 0.0121 | 1   | .   |                             |        |        |        |         |         |   |
| 4940   | O   | O   | . LEU LEU LEU B B 225 225 . | 0.2024 | 0.2051 | 0.1929 | 0.0090  | 0.0035  |   |
| 0.0107 | 1   | .   |                             |        |        |        |         |         |   |
| 4941   | N   | N   | . VAL VAL VAL B B 226 226 . | 0.1804 | 0.1883 | 0.1527 | 0.0155  | 0.0073  | - |
| 0.0050 | 1   | .   |                             |        |        |        |         |         |   |
| 4942   | CA  | CA  | . VAL VAL VAL B B 226 226 . | 0.1773 | 0.1576 | 0.1270 | 0.0203  | 0.0058  | - |
| 0.0242 | 1   | .   |                             |        |        |        |         |         |   |
| 4943   | CB  | CB  | . VAL VAL VAL B B 226 226 . | 0.1912 | 0.2004 | 0.1594 | 0.0348  | -0.0003 | - |
| 0.0388 | 1   | .   |                             |        |        |        |         |         |   |
| 4944   | CG1 | CG1 | . VAL VAL VAL B B 226 226 . | 0.1786 | 0.2073 | 0.1655 | 0.0353  | 0.0055  | - |
| 0.0367 | 1   | .   |                             |        |        |        |         |         |   |
| 4945   | CG2 | CG2 | . VAL VAL VAL B B 226 226 . | 0.2014 | 0.2184 | 0.1865 | 0.0455  | -0.0004 | - |
| 0.0553 | 1   | .   |                             |        |        |        |         |         |   |
| 4946   | C   | C   | . VAL VAL VAL B B 226 226 . | 0.1829 | 0.1570 | 0.1459 | 0.0095  | 0.0187  | - |
| 0.0083 | 1   | .   |                             |        |        |        |         |         |   |
| 4947   | O   | O   | . VAL VAL VAL B B 226 226 . | 0.2266 | 0.1743 | 0.1396 | 0.0191  | 0.0243  | - |
| 0.0258 | 1   | .   |                             |        |        |        |         |         |   |
| 4948   | N   | N   | . LYS LYS LYS B B 227 227 . | 0.2101 | 0.1839 | 0.1584 | 0.0380  | 0.0270  | - |
| 0.0060 | 1   | .   |                             |        |        |        |         |         |   |















|        |     |     |                             |        |        |        |         |         |   |
|--------|-----|-----|-----------------------------|--------|--------|--------|---------|---------|---|
| 5129   | CZ  | CZ  | . TYR TYR TYR B B 251 251 . | 0.3818 | 0.3272 | 0.3073 | 0.1191  | 0.0207  |   |
| 0.0572 | 1   | .   |                             |        |        |        |         |         |   |
| 5130   | OH  | OH  | . TYR TYR TYR B B 251 251 . | 0.4360 | 0.3935 | 0.3133 | 0.1660  | 0.0034  |   |
| 0.1024 | 1   | .   |                             |        |        |        |         |         |   |
| 5131   | CE2 | CE2 | . TYR TYR TYR B B 251 251 . | 0.4046 | 0.3460 | 0.3131 | 0.1435  | 0.0074  |   |
| 0.0843 | 1   | .   |                             |        |        |        |         |         |   |
| 5132   | CD2 | CD2 | . TYR TYR TYR B B 251 251 . | 0.4027 | 0.2569 | 0.2792 | 0.1571  | -0.0143 |   |
| 0.0490 | 1   | .   |                             |        |        |        |         |         |   |
| 5133   | C   | C   | . TYR TYR TYR B B 251 251 . | 0.2688 | 0.1820 | 0.2226 | -0.0073 | -0.0466 | - |
| 0.0433 | 1   | .   |                             |        |        |        |         |         |   |
| 5134   | O   | O   | . TYR TYR TYR B B 251 251 . | 0.3073 | 0.2228 | 0.2482 | 0.0074  | -0.0450 | - |
| 0.0549 | 1   | .   |                             |        |        |        |         |         |   |
| 5135   | N   | N   | . ARG ARG ARG B B 252 252 . | 0.2546 | 0.1637 | 0.2211 | -0.0055 | -0.0606 | - |
| 0.0483 | 1   | .   |                             |        |        |        |         |         |   |
| 5136   | CA  | CA  | . ARG ARG ARG B B 252 252 . | 0.2566 | 0.1873 | 0.2638 | -0.0192 | -0.0621 | - |
| 0.0347 | 1   | .   |                             |        |        |        |         |         |   |
| 5137   | CB  | CB  | . ARG ARG ARG B B 252 252 . | 0.2580 | 0.2070 | 0.2729 | -0.0017 | -0.0748 | - |
| 0.0198 | 1   | .   |                             |        |        |        |         |         |   |
| 5138   | CG  | CG  | . ARG ARG ARG B B 252 252 . | 0.3807 | 0.1909 | 0.3104 | -0.0031 | -0.0436 | - |
| 0.0390 | 1   | .   |                             |        |        |        |         |         |   |
| 5139   | CD  | CD  | . ARG ARG ARG B B 252 252 . | 0.3798 | 0.2706 | 0.3457 | 0.0155  | -0.0112 |   |
| 0.0069 | 1   | .   |                             |        |        |        |         |         |   |
| 5140   | NE  | NE  | . ARG ARG ARG B B 252 252 . | 0.4600 | 0.3002 | 0.3909 | 0.0028  | -0.0383 | - |
| 0.0039 | 1   | .   |                             |        |        |        |         |         |   |
| 5141   | CZ  | CZ  | . ARG ARG ARG B B 252 252 . | 0.4262 | 0.2785 | 0.3195 | 0.0078  | -0.0242 |   |
| 0.0066 | 1   | .   |                             |        |        |        |         |         |   |
| 5142   | NH1 | NH1 | . ARG ARG ARG B B 252 252 . | 0.4677 | 0.2200 | 0.4275 | 0.0174  | -0.0255 | - |
| 0.0341 | 1   | .   |                             |        |        |        |         |         |   |
| 5143   | NH2 | NH2 | . ARG ARG ARG B B 252 252 . | 0.4355 | 0.3399 | 0.3197 | 0.0315  | -0.0996 | - |
| 0.0639 | 1   | .   |                             |        |        |        |         |         |   |
| 5144   | C   | C   | . ARG ARG ARG B B 252 252 . | 0.2480 | 0.2074 | 0.2524 | -0.0016 | -0.0505 | - |
| 0.0419 | 1   | .   |                             |        |        |        |         |         |   |
| 5145   | O   | O   | . ARG ARG ARG B B 252 252 . | 0.2226 | 0.1923 | 0.2676 | -0.0026 | -0.0494 | - |
| 0.0158 | 1   | .   |                             |        |        |        |         |         |   |
| 5146   | N   | N   | . ASP ASP ASP B B 253 253 . | 0.2676 | 0.2293 | 0.2857 | -0.0087 | -0.0359 | - |
| 0.0214 | 1   | .   |                             |        |        |        |         |         |   |
| 5147   | CA  | CA  | . ASP ASP ASP B B 253 253 . | 0.2939 | 0.2475 | 0.2875 | 0.0018  | -0.0453 | - |
| 0.0257 | 1   | .   |                             |        |        |        |         |         |   |
| 5148   | CB  | CB  | . ASP ASP ASP B B 253 253 . | 0.3004 | 0.2845 | 0.3253 | -0.0104 | -0.0502 | - |
| 0.0120 | 1   | .   |                             |        |        |        |         |         |   |
| 5149   | CG  | CG  | . ASP ASP ASP B B 253 253 . | 0.4029 | 0.3650 | 0.3942 | -0.0205 | -0.0594 | - |
| 0.0506 | 1   | .   |                             |        |        |        |         |         |   |
| 5150   | OD1 | OD1 | . ASP ASP ASP B B 253 253 . | 0.5237 | 0.4162 | 0.5299 | -0.0491 | -0.1373 | - |
| 0.1165 | 1   | .   |                             |        |        |        |         |         |   |
| 5151   | OD2 | OD2 | . ASP ASP ASP B B 253 253 . | 0.4399 | 0.3705 | 0.4326 | -0.0098 | -0.0736 | - |
| 0.1014 | 1   | .   |                             |        |        |        |         |         |   |
| 5152   | C   | C   | . ASP ASP ASP B B 253 253 . | 0.2705 | 0.2324 | 0.2871 | 0.0182  | -0.0362 | - |
| 0.0140 | 1   | .   |                             |        |        |        |         |         |   |
| 5153   | O   | O   | . ASP ASP ASP B B 253 253 . | 0.2447 | 0.2233 | 0.2984 | 0.0053  | -0.0332 | - |
| 0.0186 | 1   | .   |                             |        |        |        |         |         |   |
| 5154   | N   | N   | . GLY GLY GLY B B 254 254 . | 0.2387 | 0.1770 | 0.2568 | 0.0194  | -0.0483 | - |
| 0.0240 | 1   | .   |                             |        |        |        |         |         |   |
| 5155   | CA  | CA  | . GLY GLY GLY B B 254 254 . | 0.2563 | 0.2056 | 0.2438 | 0.0455  | -0.0331 | - |
| 0.0125 | 1   | .   |                             |        |        |        |         |         |   |
| 5156   | C   | C   | . GLY GLY GLY B B 254 254 . | 0.2375 | 0.2118 | 0.2424 | 0.0259  | -0.0262 | - |
| 0.0156 | 1   | .   |                             |        |        |        |         |         |   |
| 5157   | O   | O   | . GLY GLY GLY B B 254 254 . | 0.2690 | 0.1973 | 0.2912 | 0.0264  | -0.0231 | - |
| 0.0087 | 1   | .   |                             |        |        |        |         |         |   |
| 5158   | N   | N   | . LYS LYS LYS B B 255 255 . | 0.2465 | 0.1922 | 0.2296 | 0.0275  | -0.0428 | - |
| 0.0221 | 1   | .   |                             |        |        |        |         |         |   |



|        |     |     |                             |        |        |        |         |         |   |
|--------|-----|-----|-----------------------------|--------|--------|--------|---------|---------|---|
| 5189   | CB  | CB  | . LEU LEU LEU B B 258 258 . | 0.2726 | 0.2565 | 0.3060 | 0.0431  | -0.0572 | - |
| 0.0343 | 1   | .   |                             |        |        |        |         |         |   |
| 5190   | CG  | CG  | . LEU LEU LEU B B 258 258 . | 0.2781 | 0.2424 | 0.2760 | 0.0253  | -0.0172 | - |
| 0.0295 | 1   | .   |                             |        |        |        |         |         |   |
| 5191   | CD1 | CD1 | . LEU LEU LEU B B 258 258 . | 0.2451 | 0.3130 | 0.3346 | 0.0540  | -0.0265 | - |
| 0.0273 | 1   | .   |                             |        |        |        |         |         |   |
| 5192   | CD2 | CD2 | . LEU LEU LEU B B 258 258 . | 0.2352 | 0.2373 | 0.3115 | 0.0163  | -0.0509 | - |
| 0.0175 | 1   | .   |                             |        |        |        |         |         |   |
| 5193   | C   | C   | . LEU LEU LEU B B 258 258 . | 0.2851 | 0.2657 | 0.3283 | 0.0136  | -0.0777 | - |
| 0.0297 | 1   | .   |                             |        |        |        |         |         |   |
| 5194   | O   | O   | . LEU LEU LEU B B 258 258 . | 0.2978 | 0.2310 | 0.3134 | 0.0077  | -0.1423 | - |
| 0.0266 | 1   | .   |                             |        |        |        |         |         |   |
| 5195   | N   | N   | . ASP ASP ASP B B 259 259 . | 0.2595 | 0.2604 | 0.3164 | -0.0237 | -0.0678 | - |
| 0.0199 | 1   | .   |                             |        |        |        |         |         |   |
| 5196   | CA  | CA  | . ASP ASP ASP B B 259 259 . | 0.3057 | 0.3153 | 0.3442 | -0.0194 | -0.0487 | - |
| 0.0290 | 1   | .   |                             |        |        |        |         |         |   |
| 5197   | CB  | CB  | . ASP ASP ASP B B 259 259 . | 0.2718 | 0.3147 | 0.3548 | -0.0147 | -0.0523 | - |
| 0.0219 | 1   | .   |                             |        |        |        |         |         |   |
| 5198   | CG  | CG  | . ASP ASP ASP B B 259 259 . | 0.3128 | 0.3758 | 0.3715 | -0.0174 | -0.0526 | - |
| 0.0110 | 1   | .   |                             |        |        |        |         |         |   |
| 5199   | OD1 | OD1 | . ASP ASP ASP B B 259 259 . | 0.3008 | 0.3207 | 0.3846 | -0.0314 | -0.0973 | - |
| 0.0137 | 1   | .   |                             |        |        |        |         |         |   |
| 5200   | OD2 | OD2 | . ASP ASP ASP B B 259 259 . | 0.3012 | 0.3914 | 0.4902 | -0.0521 | -0.0412 | - |
| 0.0464 | 1   | .   |                             |        |        |        |         |         |   |
| 5201   | C   | C   | . ASP ASP ASP B B 259 259 . | 0.3110 | 0.3340 | 0.3424 | -0.0181 | -0.0400 | - |
| 0.0263 | 1   | .   |                             |        |        |        |         |         |   |
| 5202   | O   | O   | . ASP ASP ASP B B 259 259 . | 0.3129 | 0.3059 | 0.3372 | -0.0196 | -0.0631 | - |
| 0.0509 | 1   | .   |                             |        |        |        |         |         |   |
| 5203   | N   | N   | . PHE PHE PHE B B 260 260 . | 0.3035 | 0.3320 | 0.3393 | -0.0172 | -0.0529 | - |
| 0.0342 | 1   | .   |                             |        |        |        |         |         |   |
| 5204   | CA  | CA  | . PHE PHE PHE B B 260 260 . | 0.3125 | 0.3197 | 0.3294 | -0.0033 | -0.0414 | - |
| 0.0080 | 1   | .   |                             |        |        |        |         |         |   |
| 5205   | CB  | CB  | . PHE PHE PHE B B 260 260 . | 0.3097 | 0.2853 | 0.3679 | -0.0287 | -0.0148 | - |
| 0.0060 | 1   | .   |                             |        |        |        |         |         |   |
| 5206   | CG  | CG  | . PHE PHE PHE B B 260 260 . | 0.2911 | 0.2261 | 0.2406 | -0.0155 | -0.0088 | - |
| 0.0246 | 1   | .   |                             |        |        |        |         |         |   |
| 5207   | CD1 | CD1 | . PHE PHE PHE B B 260 260 . | 0.3069 | 0.2045 | 0.1934 | 0.0080  | -0.0345 | - |
| 0.0262 | 1   | .   |                             |        |        |        |         |         |   |
| 5208   | CE1 | CE1 | . PHE PHE PHE B B 260 260 . | 0.2539 | 0.1960 | 0.2375 | 0.0292  | -0.0405 | - |
| 0.0104 | 1   | .   |                             |        |        |        |         |         |   |
| 5209   | CZ  | CZ  | . PHE PHE PHE B B 260 260 . | 0.2471 | 0.2570 | 0.1857 | 0.0735  | -0.0212 | - |
| 0.0018 | 1   | .   |                             |        |        |        |         |         |   |
| 5210   | CE2 | CE2 | . PHE PHE PHE B B 260 260 . | 0.2817 | 0.1095 | 0.2492 | -0.0108 | -0.0443 | - |
| 0.0052 | 1   | .   |                             |        |        |        |         |         |   |
| 5211   | CD2 | CD2 | . PHE PHE PHE B B 260 260 . | 0.2422 | 0.2015 | 0.2503 | -0.0019 | -0.0205 | - |
| 0.0277 | 1   | .   |                             |        |        |        |         |         |   |
| 5212   | C   | C   | . PHE PHE PHE B B 260 260 . | 0.3471 | 0.3084 | 0.3232 | -0.0025 | -0.0448 | - |
| 0.0177 | 1   | .   |                             |        |        |        |         |         |   |
| 5213   | O   | O   | . PHE PHE PHE B B 260 260 . | 0.3487 | 0.3285 | 0.3101 | 0.0202  | -0.0465 | - |
| 0.0154 | 1   | .   |                             |        |        |        |         |         |   |
| 5214   | N   | N   | . LYS LYS LYS B B 261 261 . | 0.3327 | 0.2786 | 0.3117 | 0.0000  | -0.0728 | - |
| 0.0233 | 1   | .   |                             |        |        |        |         |         |   |
| 5215   | CA  | CA  | . LYS LYS LYS B B 261 261 . | 0.3244 | 0.2890 | 0.2925 | -0.0161 | -0.0106 | - |
| 0.0189 | 1   | .   |                             |        |        |        |         |         |   |
| 5216   | CB  | CB  | . LYS LYS LYS B B 261 261 . | 0.3366 | 0.3208 | 0.3165 | -0.0147 | -0.0271 | - |
| 0.0344 | 1   | .   |                             |        |        |        |         |         |   |
| 5217   | CG  | CG  | . LYS LYS LYS B B 261 261 . | 0.3089 | 0.3199 | 0.3244 | -0.0320 | 0.0173  | - |
| 0.0222 | 1   | .   |                             |        |        |        |         |         |   |
| 5218   | CD  | CD  | . LYS LYS LYS B B 261 261 . | 0.3748 | 0.2625 | 0.2696 | 0.0350  | -0.0244 | - |
| 0.0312 | 1   | .   |                             |        |        |        |         |         |   |



|        |     |     |                             |        |        |        |         |         |   |
|--------|-----|-----|-----------------------------|--------|--------|--------|---------|---------|---|
| 5249   | C   | C   | . ASP ASP ASP B B 265 265 . | 0.4057 | 0.4297 | 0.4559 | -0.0148 | -0.0109 |   |
| 0.0005 | 1   | .   |                             |        |        |        |         |         |   |
| 5250   | O   | O   | . ASP ASP ASP B B 265 265 . | 0.3911 | 0.4265 | 0.4733 | -0.0141 | -0.0361 |   |
| 0.0085 | 1   | .   |                             |        |        |        |         |         |   |
| 5251   | N   | N   | . PRO PRO PRO B B 266 266 . | 0.4067 | 0.4064 | 0.4512 | -0.0033 | -0.0126 |   |
| 0.0018 | 1   | .   |                             |        |        |        |         |         |   |
| 5252   | CA  | CA  | . PRO PRO PRO B B 266 266 . | 0.4056 | 0.4116 | 0.4423 | -0.0080 | -0.0047 | - |
| 0.0054 | 1   | .   |                             |        |        |        |         |         |   |
| 5253   | CB  | CB  | . PRO PRO PRO B B 266 266 . | 0.4098 | 0.4128 | 0.4392 | 0.0000  | -0.0125 |   |
| 0.0041 | 1   | .   |                             |        |        |        |         |         |   |
| 5254   | CG  | CG  | . PRO PRO PRO B B 266 266 . | 0.4014 | 0.3621 | 0.4572 | 0.0057  | -0.0055 | - |
| 0.0222 | 1   | .   |                             |        |        |        |         |         |   |
| 5255   | CD  | CD  | . PRO PRO PRO B B 266 266 . | 0.4177 | 0.4129 | 0.4573 | -0.0050 | -0.0136 | - |
| 0.0088 | 1   | .   |                             |        |        |        |         |         |   |
| 5256   | C   | C   | . PRO PRO PRO B B 266 266 . | 0.3941 | 0.4148 | 0.4375 | -0.0176 | -0.0075 | - |
| 0.0016 | 1   | .   |                             |        |        |        |         |         |   |
| 5257   | O   | O   | . PRO PRO PRO B B 266 266 . | 0.3798 | 0.3604 | 0.4554 | -0.0617 | 0.0001  | - |
| 0.0021 | 1   | .   |                             |        |        |        |         |         |   |
| 5258   | N   | N   | . SER SER SER B B 267 267 . | 0.3508 | 0.3920 | 0.4304 | -0.0345 | 0.0000  | - |
| 0.0018 | 1   | .   |                             |        |        |        |         |         |   |
| 5259   | CA  | CA  | . SER SER SER B B 267 267 . | 0.3788 | 0.4012 | 0.4316 | -0.0283 | -0.0151 | - |
| 0.0042 | 1   | .   |                             |        |        |        |         |         |   |
| 5260   | CB  | CB  | . SER SER SER B B 267 267 . | 0.3717 | 0.4232 | 0.4411 | -0.0207 | -0.0038 | - |
| 0.0107 | 1   | .   |                             |        |        |        |         |         |   |
| 5261   | OG  | OG  | . SER SER SER B B 267 267 . | 0.4339 | 0.4730 | 0.4604 | -0.0404 | -0.0291 | - |
| 0.0097 | 1   | .   |                             |        |        |        |         |         |   |
| 5262   | C   | C   | . SER SER SER B B 267 267 . | 0.3564 | 0.3845 | 0.4078 | -0.0446 | -0.0168 | - |
| 0.0087 | 1   | .   |                             |        |        |        |         |         |   |
| 5263   | O   | O   | . SER SER SER B B 267 267 . | 0.3747 | 0.3979 | 0.4289 | -0.0569 | -0.0052 |   |
| 0.0044 | 1   | .   |                             |        |        |        |         |         |   |
| 5264   | N   | N   | . ARG ARG ARG B B 268 268 . | 0.3241 | 0.3356 | 0.3841 | -0.0401 | -0.0433 |   |
| 0.0098 | 1   | .   |                             |        |        |        |         |         |   |
| 5265   | CA  | CA  | . ARG ARG ARG B B 268 268 . | 0.3154 | 0.3344 | 0.3751 | -0.0391 | -0.0375 |   |
| 0.0057 | 1   | .   |                             |        |        |        |         |         |   |
| 5266   | CB  | CB  | . ARG ARG ARG B B 268 268 . | 0.3112 | 0.3305 | 0.3604 | -0.0493 | -0.0469 |   |
| 0.0046 | 1   | .   |                             |        |        |        |         |         |   |
| 5267   | CG  | CG  | . ARG ARG ARG B B 268 268 . | 0.2863 | 0.3340 | 0.3369 | -0.0500 | -0.0272 | - |
| 0.0189 | 1   | .   |                             |        |        |        |         |         |   |
| 5268   | CD  | CD  | . ARG ARG ARG B B 268 268 . | 0.3236 | 0.3349 | 0.3426 | -0.0358 | -0.0137 | - |
| 0.0090 | 1   | .   |                             |        |        |        |         |         |   |
| 5269   | NE  | NE  | . ARG ARG ARG B B 268 268 . | 0.2928 | 0.3122 | 0.3557 | -0.0402 | 0.0061  | - |
| 0.0404 | 1   | .   |                             |        |        |        |         |         |   |
| 5270   | CZ  | CZ  | . ARG ARG ARG B B 268 268 . | 0.2731 | 0.3531 | 0.3373 | -0.0481 | -0.0336 | - |
| 0.0174 | 1   | .   |                             |        |        |        |         |         |   |
| 5271   | NH1 | NH1 | . ARG ARG ARG B B 268 268 . | 0.3017 | 0.3374 | 0.3936 | -0.0967 | -0.0302 | - |
| 0.0491 | 1   | .   |                             |        |        |        |         |         |   |
| 5272   | NH2 | NH2 | . ARG ARG ARG B B 268 268 . | 0.2786 | 0.3610 | 0.3972 | -0.0801 | -0.0385 | - |
| 0.0610 | 1   | .   |                             |        |        |        |         |         |   |
| 5273   | C   | C   | . ARG ARG ARG B B 268 268 . | 0.3006 | 0.3190 | 0.3812 | -0.0215 | -0.0330 |   |
| 0.0043 | 1   | .   |                             |        |        |        |         |         |   |
| 5274   | O   | O   | . ARG ARG ARG B B 268 268 . | 0.3102 | 0.3021 | 0.3993 | -0.0398 | -0.0421 |   |
| 0.0017 | 1   | .   |                             |        |        |        |         |         |   |
| 5275   | N   | N   | . TYR TYR TYR B B 269 269 . | 0.3027 | 0.3147 | 0.3796 | -0.0170 | -0.0121 |   |
| 0.0054 | 1   | .   |                             |        |        |        |         |         |   |
| 5276   | CA  | CA  | . TYR TYR TYR B B 269 269 . | 0.2734 | 0.2904 | 0.3750 | -0.0005 | -0.0192 | - |
| 0.0104 | 1   | .   |                             |        |        |        |         |         |   |
| 5277   | CB  | CB  | . TYR TYR TYR B B 269 269 . | 0.2974 | 0.2733 | 0.3787 | 0.0049  | -0.0138 | - |
| 0.0027 | 1   | .   |                             |        |        |        |         |         |   |
| 5278   | CG  | CG  | . TYR TYR TYR B B 269 269 . | 0.2603 | 0.3039 | 0.3935 | -0.0109 | -0.0336 | - |
| 0.0109 | 1   | .   |                             |        |        |        |         |         |   |

|        |     |     |                             |        |        |        |         |         |   |
|--------|-----|-----|-----------------------------|--------|--------|--------|---------|---------|---|
| 5279   | CD1 | CD1 | . TYR TYR TYR B B 269 269 . | 0.2516 | 0.2537 | 0.3648 | -0.0320 | -0.0537 | - |
| 0.0648 | 1   | .   |                             |        |        |        |         |         |   |
| 5280   | CE1 | CE1 | . TYR TYR TYR B B 269 269 . | 0.3203 | 0.2785 | 0.3421 | -0.0366 | -0.0367 | - |
| 0.0392 | 1   | .   |                             |        |        |        |         |         |   |
| 5281   | CZ  | CZ  | . TYR TYR TYR B B 269 269 . | 0.3935 | 0.2824 | 0.4026 | -0.0133 | -0.0144 | - |
| 0.0127 | 1   | .   |                             |        |        |        |         |         |   |
| 5282   | OH  | OH  | . TYR TYR TYR B B 269 269 . | 0.4088 | 0.3852 | 0.3683 | -0.0122 | -0.0138 | - |
| 0.0352 | 1   | .   |                             |        |        |        |         |         |   |
| 5283   | CE2 | CE2 | . TYR TYR TYR B B 269 269 . | 0.3130 | 0.3310 | 0.4141 | 0.0213  | -0.0143 | - |
| 0.0536 | 1   | .   |                             |        |        |        |         |         |   |
| 5284   | CD2 | CD2 | . TYR TYR TYR B B 269 269 . | 0.3559 | 0.2717 | 0.4120 | -0.0358 | -0.0299 | - |
| 0.0150 | 1   | .   |                             |        |        |        |         |         |   |
| 5285   | C   | C   | . TYR TYR TYR B B 269 269 . | 0.2876 | 0.2889 | 0.3848 | -0.0084 | -0.0015 | - |
| 0.0061 | 1   | .   |                             |        |        |        |         |         |   |
| 5286   | O   | O   | . TYR TYR TYR B B 269 269 . | 0.2900 | 0.3000 | 0.3817 | -0.0275 | -0.0063 | - |
| 0.0103 | 1   | .   |                             |        |        |        |         |         |   |
| 5287   | N   | N   | . ILE ILE ILE B B 270 270 . | 0.2825 | 0.2372 | 0.3469 | -0.0017 | -0.0116 | - |
| 0.0085 | 1   | .   |                             |        |        |        |         |         |   |
| 5288   | CA  | CA  | . ILE ILE ILE B B 270 270 . | 0.2766 | 0.2259 | 0.3553 | -0.0057 | -0.0082 | - |
| 0.0033 | 1   | .   |                             |        |        |        |         |         |   |
| 5289   | CB  | CB  | . ILE ILE ILE B B 270 270 . | 0.2470 | 0.1935 | 0.3254 | -0.0065 | -0.0142 | - |
| 0.0080 | 1   | .   |                             |        |        |        |         |         |   |
| 5290   | CG1 | CG1 | . ILE ILE ILE B B 270 270 . | 0.2122 | 0.1974 | 0.3254 | -0.0117 | 0.0078  | - |
| 0.0208 | 1   | .   |                             |        |        |        |         |         |   |
| 5291   | CD  | CD  | . ILE ILE ILE B B 270 270 . | 0.2312 | 0.1836 | 0.3155 | 0.0577  | -0.0070 | - |
| 0.0199 | 1   | .   |                             |        |        |        |         |         |   |
| 5292   | CG2 | CG2 | . ILE ILE ILE B B 270 270 . | 0.2553 | 0.2381 | 0.4090 | -0.0471 | -0.0185 | - |
| 0.0035 | 1   | .   |                             |        |        |        |         |         |   |
| 5293   | C   | C   | . ILE ILE ILE B B 270 270 . | 0.2667 | 0.1916 | 0.3039 | -0.0128 | -0.0053 | - |
| 0.0051 | 1   | .   |                             |        |        |        |         |         |   |
| 5294   | O   | O   | . ILE ILE ILE B B 270 270 . | 0.2792 | 0.2271 | 0.3411 | 0.0097  | -0.0067 | - |
| 0.0128 | 1   | .   |                             |        |        |        |         |         |   |
| 5295   | N   | N   | . THR THR THR B B 271 271 . | 0.2903 | 0.2144 | 0.3451 | -0.0064 | -0.0006 | - |
| 0.0082 | 1   | .   |                             |        |        |        |         |         |   |
| 5296   | CA  | CA  | . THR THR THR B B 271 271 . | 0.2524 | 0.2070 | 0.3082 | -0.0009 | -0.0053 | - |
| 0.0059 | 1   | .   |                             |        |        |        |         |         |   |
| 5297   | CB  | CB  | . THR THR THR B B 271 271 . | 0.2735 | 0.2224 | 0.3142 | -0.0052 | 0.0149  | - |
| 0.0014 | 1   | .   |                             |        |        |        |         |         |   |
| 5298   | OG1 | OG1 | . THR THR THR B B 271 271 . | 0.3123 | 0.2255 | 0.2954 | 0.0165  | 0.0309  | - |
| 0.0187 | 1   | .   |                             |        |        |        |         |         |   |
| 5299   | CG2 | CG2 | . THR THR THR B B 271 271 . | 0.2888 | 0.2036 | 0.3736 | 0.0245  | 0.0157  | - |
| 0.0575 | 1   | .   |                             |        |        |        |         |         |   |
| 5300   | C   | C   | . THR THR THR B B 271 271 . | 0.2525 | 0.2301 | 0.3111 | -0.0007 | 0.0031  | - |
| 0.0102 | 1   | .   |                             |        |        |        |         |         |   |
| 5301   | O   | O   | . THR THR THR B B 271 271 . | 0.1930 | 0.2520 | 0.3307 | 0.0179  | -0.0051 | - |
| 0.0205 | 1   | .   |                             |        |        |        |         |         |   |
| 5302   | N   | N   | . GLY GLY GLY B B 272 272 . | 0.2438 | 0.2214 | 0.2817 | -0.0110 | 0.0170  | - |
| 0.0033 | 1   | .   |                             |        |        |        |         |         |   |
| 5303   | CA  | CA  | . GLY GLY GLY B B 272 272 . | 0.2505 | 0.2066 | 0.2561 | -0.0032 | 0.0225  | - |
| 0.0026 | 1   | .   |                             |        |        |        |         |         |   |
| 5304   | C   | C   | . GLY GLY GLY B B 272 272 . | 0.2598 | 0.2087 | 0.2624 | 0.0022  | 0.0221  | - |
| 0.0000 | 1   | .   |                             |        |        |        |         |         |   |
| 5305   | O   | O   | . GLY GLY GLY B B 272 272 . | 0.2441 | 0.1667 | 0.2525 | 0.0103  | 0.0091  | - |
| 0.0163 | 1   | .   |                             |        |        |        |         |         |   |
| 5306   | N   | N   | . ASP ASP ASP B B 273 273 . | 0.2246 | 0.2186 | 0.2295 | -0.0003 | 0.0136  | - |
| 0.0115 | 1   | .   |                             |        |        |        |         |         |   |
| 5307   | CA  | CA  | . ASP ASP ASP B B 273 273 . | 0.2784 | 0.2674 | 0.2784 | -0.0036 | 0.0294  | - |
| 0.0104 | 1   | .   |                             |        |        |        |         |         |   |
| 5308   | CB  | CB  | . ASP ASP ASP B B 273 273 . | 0.3073 | 0.3045 | 0.2926 | 0.0075  | 0.0246  | - |
| 0.0404 | 1   | .   |                             |        |        |        |         |         |   |



|        |     |     |                             |        |        |        |         |         |   |
|--------|-----|-----|-----------------------------|--------|--------|--------|---------|---------|---|
| 5339   | O   | O   | . ALA ALA ALA B B 277 277 . | 0.2333 | 0.1634 | 0.2321 | 0.0106  | 0.0435  |   |
| 0.0152 | 1   | .   |                             |        |        |        |         |         |   |
| 5340   | N   | N   | . LEU LEU LEU B B 278 278 . | 0.2234 | 0.1665 | 0.2246 | 0.0009  | 0.0173  |   |
| 0.0152 | 1   | .   |                             |        |        |        |         |         |   |
| 5341   | CA  | CA  | . LEU LEU LEU B B 278 278 . | 0.2153 | 0.2014 | 0.2156 | -0.0014 | -0.0036 |   |
| 0.0053 | 1   | .   |                             |        |        |        |         |         |   |
| 5342   | CB  | CB  | . LEU LEU LEU B B 278 278 . | 0.2292 | 0.1718 | 0.2394 | 0.0285  | 0.0077  | - |
| 0.0002 | 1   | .   |                             |        |        |        |         |         |   |
| 5343   | CG  | CG  | . LEU LEU LEU B B 278 278 . | 0.2744 | 0.2672 | 0.2692 | 0.0591  | -0.0151 | - |
| 0.0198 | 1   | .   |                             |        |        |        |         |         |   |
| 5344   | CD1 | CD1 | . LEU LEU LEU B B 278 278 . | 0.3325 | 0.2245 | 0.3408 | 0.0320  | 0.0423  |   |
| 0.0227 | 1   | .   |                             |        |        |        |         |         |   |
| 5345   | CD2 | CD2 | . LEU LEU LEU B B 278 278 . | 0.3459 | 0.3810 | 0.2974 | 0.0297  | -0.0118 | - |
| 0.0843 | 1   | .   |                             |        |        |        |         |         |   |
| 5346   | C   | C   | . LEU LEU LEU B B 278 278 . | 0.2086 | 0.1814 | 0.1885 | 0.0050  | 0.0017  | - |
| 0.0013 | 1   | .   |                             |        |        |        |         |         |   |
| 5347   | O   | O   | . LEU LEU LEU B B 278 278 . | 0.2120 | 0.2111 | 0.1860 | 0.0091  | -0.0178 | - |
| 0.0187 | 1   | .   |                             |        |        |        |         |         |   |
| 5348   | N   | N   | . TYR TYR TYR B B 279 279 . | 0.1711 | 0.1609 | 0.1736 | -0.0083 | -0.0026 |   |
| 0.0030 | 1   | .   |                             |        |        |        |         |         |   |
| 5349   | CA  | CA  | . TYR TYR TYR B B 279 279 . | 0.1703 | 0.1348 | 0.1574 | 0.0000  | -0.0055 | - |
| 0.0165 | 1   | .   |                             |        |        |        |         |         |   |
| 5350   | CB  | CB  | . TYR TYR TYR B B 279 279 . | 0.1652 | 0.1401 | 0.1313 | 0.0239  | 0.0174  | - |
| 0.0323 | 1   | .   |                             |        |        |        |         |         |   |
| 5351   | CG  | CG  | . TYR TYR TYR B B 279 279 . | 0.1916 | 0.1162 | 0.1071 | 0.0282  | -0.0054 | - |
| 0.0246 | 1   | .   |                             |        |        |        |         |         |   |
| 5352   | CD1 | CD1 | . TYR TYR TYR B B 279 279 . | 0.1742 | 0.1475 | 0.1567 | -0.0150 | 0.0190  | - |
| 0.0207 | 1   | .   |                             |        |        |        |         |         |   |
| 5353   | CE1 | CE1 | . TYR TYR TYR B B 279 279 . | 0.1918 | 0.1621 | 0.1203 | 0.0031  | 0.0121  | - |
| 0.0125 | 1   | .   |                             |        |        |        |         |         |   |
| 5354   | CZ  | CZ  | . TYR TYR TYR B B 279 279 . | 0.1847 | 0.1389 | 0.1307 | 0.0149  | 0.0059  | - |
| 0.0129 | 1   | .   |                             |        |        |        |         |         |   |
| 5355   | OH  | OH  | . TYR TYR TYR B B 279 279 . | 0.2222 | 0.1323 | 0.1404 | 0.0221  | -0.0065 |   |
| 0.0041 | 1   | .   |                             |        |        |        |         |         |   |
| 5356   | CE2 | CE2 | . TYR TYR TYR B B 279 279 . | 0.2079 | 0.0995 | 0.1037 | 0.0193  | 0.0220  | - |
| 0.0101 | 1   | .   |                             |        |        |        |         |         |   |
| 5357   | CD2 | CD2 | . TYR TYR TYR B B 279 279 . | 0.1465 | 0.1205 | 0.1545 | -0.0048 | 0.0369  | - |
| 0.0346 | 1   | .   |                             |        |        |        |         |         |   |
| 5358   | C   | C   | . TYR TYR TYR B B 279 279 . | 0.1885 | 0.1552 | 0.1383 | 0.0082  | 0.0079  | - |
| 0.0005 | 1   | .   |                             |        |        |        |         |         |   |
| 5359   | O   | O   | . TYR TYR TYR B B 279 279 . | 0.2012 | 0.1541 | 0.1477 | -0.0005 | 0.0150  | - |
| 0.0009 | 1   | .   |                             |        |        |        |         |         |   |
| 5360   | N   | N   | . GLN GLN GLN B B 280 280 . | 0.1838 | 0.1813 | 0.1273 | 0.0099  | 0.0253  |   |
| 0.0025 | 1   | .   |                             |        |        |        |         |         |   |
| 5361   | CA  | CA  | . GLN GLN GLN B B 280 280 . | 0.2300 | 0.2095 | 0.1578 | 0.0143  | 0.0177  |   |
| 0.0111 | 1   | .   |                             |        |        |        |         |         |   |
| 5362   | CB  | CB  | . GLN GLN GLN B B 280 280 . | 0.2222 | 0.2067 | 0.1344 | 0.0098  | 0.0096  |   |
| 0.0364 | 1   | .   |                             |        |        |        |         |         |   |
| 5363   | CG  | CG  | . GLN GLN GLN B B 280 280 . | 0.3031 | 0.2585 | 0.2179 | 0.0464  | -0.0200 |   |
| 0.0580 | 1   | .   |                             |        |        |        |         |         |   |
| 5364   | CD  | CD  | . GLN GLN GLN B B 280 280 . | 0.4768 | 0.4339 | 0.3619 | 0.0008  | -0.1197 |   |
| 0.0484 | 1   | .   |                             |        |        |        |         |         |   |
| 5365   | OE1 | OE1 | . GLN GLN GLN B B 280 280 . | 0.5313 | 0.4575 | 0.4828 | -0.0265 | -0.1782 | - |
| 0.0358 | 1   | .   |                             |        |        |        |         |         |   |
| 5366   | NE2 | NE2 | . GLN GLN GLN B B 280 280 . | 0.5774 | 0.4324 | 0.4495 | -0.0062 | -0.0916 |   |
| 0.0664 | 1   | .   |                             |        |        |        |         |         |   |
| 5367   | C   | C   | . GLN GLN GLN B B 280 280 . | 0.2432 | 0.1993 | 0.1625 | 0.0171  | 0.0142  |   |
| 0.0198 | 1   | .   |                             |        |        |        |         |         |   |
| 5368   | O   | O   | . GLN GLN GLN B B 280 280 . | 0.2658 | 0.2171 | 0.1811 | 0.0225  | 0.0211  | - |
| 0.0172 | 1   | .   |                             |        |        |        |         |         |   |



|        |     |     |                             |        |        |        |         |         |   |
|--------|-----|-----|-----------------------------|--------|--------|--------|---------|---------|---|
| 5369   | N   | N   | . ASP ASP ASP B B 281 281 . | 0.1973 | 0.2100 | 0.1847 | 0.0123  | 0.0231  | - |
| 0.0034 | 1   | .   |                             |        |        |        |         |         |   |
| 5370   | CA  | CA  | . ASP ASP ASP B B 281 281 . | 0.2131 | 0.2250 | 0.2201 | 0.0206  | 0.0160  |   |
| 0.0114 | 1   | .   |                             |        |        |        |         |         |   |
| 5371   | CB  | CB  | . ASP ASP ASP B B 281 281 . | 0.2366 | 0.2314 | 0.2556 | 0.0092  | 0.0255  |   |
| 0.0125 | 1   | .   |                             |        |        |        |         |         |   |
| 5372   | CG  | CG  | . ASP ASP ASP B B 281 281 . | 0.3108 | 0.3214 | 0.3218 | -0.0033 | 0.0110  |   |
| 0.0248 | 1   | .   |                             |        |        |        |         |         |   |
| 5373   | OD1 | OD1 | . ASP ASP ASP B B 281 281 . | 0.3057 | 0.3979 | 0.3471 | -0.0002 | 0.0853  |   |
| 0.0100 | 1   | .   |                             |        |        |        |         |         |   |
| 5374   | OD2 | OD2 | . ASP ASP ASP B B 281 281 . | 0.3487 | 0.3320 | 0.4986 | -0.0579 | 0.0307  |   |
| 0.0235 | 1   | .   |                             |        |        |        |         |         |   |
| 5375   | C   | C   | . ASP ASP ASP B B 281 281 . | 0.2199 | 0.2356 | 0.2161 | 0.0269  | 0.0173  |   |
| 0.0041 | 1   | .   |                             |        |        |        |         |         |   |
| 5376   | O   | O   | . ASP ASP ASP B B 281 281 . | 0.2244 | 0.2339 | 0.2061 | 0.0369  | 0.0346  | - |
| 0.0070 | 1   | .   |                             |        |        |        |         |         |   |
| 5377   | N   | N   | . PHE PHE PHE B B 282 282 . | 0.2076 | 0.2207 | 0.1550 | 0.0284  | 0.0184  |   |
| 0.0214 | 1   | .   |                             |        |        |        |         |         |   |
| 5378   | CA  | CA  | . PHE PHE PHE B B 282 282 . | 0.2047 | 0.1814 | 0.1916 | 0.0217  | 0.0218  |   |
| 0.0114 | 1   | .   |                             |        |        |        |         |         |   |
| 5379   | CB  | CB  | . PHE PHE PHE B B 282 282 . | 0.2394 | 0.1999 | 0.1871 | 0.0056  | 0.0144  |   |
| 0.0056 | 1   | .   |                             |        |        |        |         |         |   |
| 5380   | CG  | CG  | . PHE PHE PHE B B 282 282 . | 0.2956 | 0.2121 | 0.1915 | 0.0418  | -0.0039 |   |
| 0.0242 | 1   | .   |                             |        |        |        |         |         |   |
| 5381   | CD1 | CD1 | . PHE PHE PHE B B 282 282 . | 0.2787 | 0.1732 | 0.2003 | 0.0399  | 0.0177  | - |
| 0.0123 | 1   | .   |                             |        |        |        |         |         |   |
| 5382   | CE1 | CE1 | . PHE PHE PHE B B 282 282 . | 0.3578 | 0.2729 | 0.2171 | 0.0071  | -0.0226 |   |
| 0.0015 | 1   | .   |                             |        |        |        |         |         |   |
| 5383   | CZ  | CZ  | . PHE PHE PHE B B 282 282 . | 0.3409 | 0.2493 | 0.2608 | 0.0217  | -0.0194 |   |
| 0.0061 | 1   | .   |                             |        |        |        |         |         |   |
| 5384   | CE2 | CE2 | . PHE PHE PHE B B 282 282 . | 0.3633 | 0.2564 | 0.2841 | 0.0088  | -0.0278 |   |
| 0.0242 | 1   | .   |                             |        |        |        |         |         |   |
| 5385   | CD2 | CD2 | . PHE PHE PHE B B 282 282 . | 0.3250 | 0.2168 | 0.1837 | 0.0492  | -0.0248 |   |
| 0.0076 | 1   | .   |                             |        |        |        |         |         |   |
| 5386   | C   | C   | . PHE PHE PHE B B 282 282 . | 0.2250 | 0.1856 | 0.1613 | 0.0217  | 0.0018  |   |
| 0.0056 | 1   | .   |                             |        |        |        |         |         |   |
| 5387   | O   | O   | . PHE PHE PHE B B 282 282 . | 0.2713 | 0.1874 | 0.1611 | 0.0430  | 0.0022  | - |
| 0.0201 | 1   | .   |                             |        |        |        |         |         |   |
| 5388   | N   | N   | . VAL VAL VAL B B 283 283 . | 0.1745 | 0.1726 | 0.1488 | 0.0013  | 0.0027  | - |
| 0.0100 | 1   | .   |                             |        |        |        |         |         |   |
| 5389   | CA  | CA  | . VAL VAL VAL B B 283 283 . | 0.1990 | 0.1871 | 0.1646 | 0.0068  | 0.0165  | - |
| 0.0152 | 1   | .   |                             |        |        |        |         |         |   |
| 5390   | CB  | CB  | . VAL VAL VAL B B 283 283 . | 0.1851 | 0.1970 | 0.1491 | -0.0023 | 0.0232  | - |
| 0.0165 | 1   | .   |                             |        |        |        |         |         |   |
| 5391   | CG1 | CG1 | . VAL VAL VAL B B 283 283 . | 0.1945 | 0.2383 | 0.1843 | 0.0394  | -0.0239 | - |
| 0.0219 | 1   | .   |                             |        |        |        |         |         |   |
| 5392   | CG2 | CG2 | . VAL VAL VAL B B 283 283 . | 0.1582 | 0.1703 | 0.1305 | 0.0051  | 0.0267  | - |
| 0.0251 | 1   | .   |                             |        |        |        |         |         |   |
| 5393   | C   | C   | . VAL VAL VAL B B 283 283 . | 0.2159 | 0.1892 | 0.1553 | 0.0094  | 0.0262  | - |
| 0.0100 | 1   | .   |                             |        |        |        |         |         |   |
| 5394   | O   | O   | . VAL VAL VAL B B 283 283 . | 0.2611 | 0.1796 | 0.1574 | 0.0167  | 0.0392  |   |
| 0.0022 | 1   | .   |                             |        |        |        |         |         |   |
| 5395   | N   | N   | . ARG ARG ARG B B 284 284 . | 0.2173 | 0.2073 | 0.1657 | 0.0317  | 0.0307  | - |
| 0.0150 | 1   | .   |                             |        |        |        |         |         |   |
| 5396   | CA  | CA  | . ARG ARG ARG B B 284 284 . | 0.2424 | 0.2094 | 0.1797 | 0.0373  | 0.0547  |   |
| 0.0013 | 1   | .   |                             |        |        |        |         |         |   |
| 5397   | CB  | CB  | . ARG ARG ARG B B 284 284 . | 0.2562 | 0.1844 | 0.2192 | 0.0165  | 0.0837  | - |
| 0.0081 | 1   | .   |                             |        |        |        |         |         |   |
| 5398   | CG  | CG  | . ARG ARG ARG B B 284 284 . | 0.2146 | 0.1974 | 0.2394 | -0.0004 | 0.0495  | - |
| 0.0136 | 1   | .   |                             |        |        |        |         |         |   |

|        |     |     |                             |        |        |        |         |         |   |
|--------|-----|-----|-----------------------------|--------|--------|--------|---------|---------|---|
| 5399   | CD  | CD  | . ARG ARG ARG B B 284 284 . | 0.3138 | 0.3449 | 0.2443 | 0.0028  | 0.0328  | - |
| 0.0103 | 1   | .   |                             |        |        |        |         |         |   |
| 5400   | NE  | NE  | . ARG ARG ARG B B 284 284 . | 0.3295 | 0.4218 | 0.2652 | -0.0367 | -0.0174 | - |
| 0.0039 | 1   | .   |                             |        |        |        |         |         |   |
| 5401   | CZ  | CZ  | . ARG ARG ARG B B 284 284 . | 0.3840 | 0.4066 | 0.3025 | -0.0118 | -0.0273 | - |
| 0.0229 | 1   | .   |                             |        |        |        |         |         |   |
| 5402   | NH1 | NH1 | . ARG ARG ARG B B 284 284 . | 0.4149 | 0.4377 | 0.2971 | -0.0385 | -0.0114 | - |
| 0.0234 | 1   | .   |                             |        |        |        |         |         |   |
| 5403   | NH2 | NH2 | . ARG ARG ARG B B 284 284 . | 0.4474 | 0.4457 | 0.2548 | 0.0242  | -0.0577 | - |
| 0.0256 | 1   | .   |                             |        |        |        |         |         |   |
| 5404   | C   | C   | . ARG ARG ARG B B 284 284 . | 0.2383 | 0.2026 | 0.1870 | 0.0296  | 0.0445  | - |
| 0.0006 | 1   | .   |                             |        |        |        |         |         |   |
| 5405   | O   | O   | . ARG ARG ARG B B 284 284 . | 0.2969 | 0.2191 | 0.1772 | 0.0441  | 0.0355  | - |
| 0.0124 | 1   | .   |                             |        |        |        |         |         |   |
| 5406   | N   | N   | . ASP ASP ASP B B 285 285 . | 0.2197 | 0.2304 | 0.1989 | 0.0255  | 0.0276  | - |
| 0.0204 | 1   | .   |                             |        |        |        |         |         |   |
| 5407   | CA  | CA  | . ASP ASP ASP B B 285 285 . | 0.2322 | 0.2211 | 0.1823 | 0.0287  | 0.0401  | - |
| 0.0314 | 1   | .   |                             |        |        |        |         |         |   |
| 5408   | CB  | CB  | . ASP ASP ASP B B 285 285 . | 0.2372 | 0.2131 | 0.1747 | 0.0194  | 0.0360  | - |
| 0.0384 | 1   | .   |                             |        |        |        |         |         |   |
| 5409   | CG  | CG  | . ASP ASP ASP B B 285 285 . | 0.2884 | 0.2537 | 0.2534 | -0.0095 | 0.0540  | - |
| 0.0023 | 1   | .   |                             |        |        |        |         |         |   |
| 5410   | OD1 | OD1 | . ASP ASP ASP B B 285 285 . | 0.3266 | 0.3239 | 0.2627 | -0.0537 | 0.0463  | - |
| 0.0308 | 1   | .   |                             |        |        |        |         |         |   |
| 5411   | OD2 | OD2 | . ASP ASP ASP B B 285 285 . | 0.3141 | 0.3195 | 0.3303 | -0.0734 | 0.0462  | - |
| 0.0193 | 1   | .   |                             |        |        |        |         |         |   |
| 5412   | C   | C   | . ASP ASP ASP B B 285 285 . | 0.2297 | 0.2309 | 0.2028 | 0.0374  | 0.0343  | - |
| 0.0278 | 1   | .   |                             |        |        |        |         |         |   |
| 5413   | O   | O   | . ASP ASP ASP B B 285 285 . | 0.2202 | 0.2334 | 0.2199 | 0.0511  | 0.0477  | - |
| 0.0229 | 1   | .   |                             |        |        |        |         |         |   |
| 5414   | N   | N   | . TYR TYR TYR B B 286 286 . | 0.2413 | 0.2180 | 0.1880 | 0.0240  | 0.0256  | - |
| 0.0008 | 1   | .   |                             |        |        |        |         |         |   |
| 5415   | CA  | CA  | . TYR TYR TYR B B 286 286 . | 0.2299 | 0.2010 | 0.1553 | 0.0169  | 0.0351  | - |
| 0.0058 | 1   | .   |                             |        |        |        |         |         |   |
| 5416   | CB  | CB  | . TYR TYR TYR B B 286 286 . | 0.2424 | 0.1755 | 0.1816 | 0.0245  | 0.0186  | - |
| 0.0243 | 1   | .   |                             |        |        |        |         |         |   |
| 5417   | CG  | CG  | . TYR TYR TYR B B 286 286 . | 0.2455 | 0.2566 | 0.1998 | 0.0283  | 0.0507  | - |
| 0.0384 | 1   | .   |                             |        |        |        |         |         |   |
| 5418   | CD1 | CD1 | . TYR TYR TYR B B 286 286 . | 0.2911 | 0.3231 | 0.1574 | 0.0165  | 0.0211  | - |
| 0.0100 | 1   | .   |                             |        |        |        |         |         |   |
| 5419   | CE1 | CE1 | . TYR TYR TYR B B 286 286 . | 0.2753 | 0.3572 | 0.2131 | 0.0401  | 0.0465  | - |
| 0.0333 | 1   | .   |                             |        |        |        |         |         |   |
| 5420   | CZ  | CZ  | . TYR TYR TYR B B 286 286 . | 0.2915 | 0.3948 | 0.2827 | -0.0277 | 0.0332  | - |
| 0.0493 | 1   | .   |                             |        |        |        |         |         |   |
| 5421   | OH  | OH  | . TYR TYR TYR B B 286 286 . | 0.3202 | 0.5792 | 0.3937 | -0.0208 | 0.0038  | - |
| 0.0620 | 1   | .   |                             |        |        |        |         |         |   |
| 5422   | CE2 | CE2 | . TYR TYR TYR B B 286 286 . | 0.3048 | 0.3694 | 0.2314 | -0.0408 | 0.0204  | - |
| 0.0380 | 1   | .   |                             |        |        |        |         |         |   |
| 5423   | CD2 | CD2 | . TYR TYR TYR B B 286 286 . | 0.2361 | 0.2928 | 0.1912 | 0.0007  | 0.0308  | - |
| 0.0346 | 1   | .   |                             |        |        |        |         |         |   |
| 5424   | C   | C   | . TYR TYR TYR B B 286 286 . | 0.2249 | 0.1971 | 0.1838 | 0.0341  | 0.0324  | - |
| 0.0077 | 1   | .   |                             |        |        |        |         |         |   |
| 5425   | O   | O   | . TYR TYR TYR B B 286 286 . | 0.2273 | 0.2042 | 0.1697 | 0.0201  | 0.0179  | - |
| 0.0087 | 1   | .   |                             |        |        |        |         |         |   |
| 5426   | N   | N   | . PRO PRO PRO B B 287 287 . | 0.2117 | 0.1885 | 0.1674 | 0.0369  | 0.0376  | - |
| 0.0155 | 1   | .   |                             |        |        |        |         |         |   |
| 5427   | CA  | CA  | . PRO PRO PRO B B 287 287 . | 0.2139 | 0.1438 | 0.1843 | 0.0282  | 0.0281  | - |
| 0.0081 | 1   | .   |                             |        |        |        |         |         |   |
| 5428   | CB  | CB  | . PRO PRO PRO B B 287 287 . | 0.2536 | 0.1580 | 0.1805 | 0.0587  | 0.0105  | - |
| 0.0033 | 1   | .   |                             |        |        |        |         |         |   |



|        |     |     |                             |        |        |        |         |         |   |
|--------|-----|-----|-----------------------------|--------|--------|--------|---------|---------|---|
| 5459   | C   | C   | . ILE ILE ILE B B 291 291 . | 0.1311 | 0.1409 | 0.0939 | 0.0266  | 0.0014  | - |
| 0.0099 | 1   | .   |                             |        |        |        |         |         |   |
| 5460   | O   | O   | . ILE ILE ILE B B 291 291 . | 0.1624 | 0.1453 | 0.1016 | 0.0279  | 0.0090  | - |
| 0.0181 | 1   | .   |                             |        |        |        |         |         |   |
| 5461   | N   | N   | . GLU GLU GLU B B 292 292 . | 0.1485 | 0.1239 | 0.0734 | 0.0335  | -0.0066 | - |
| 0.0143 | 1   | .   |                             |        |        |        |         |         |   |
| 5462   | CA  | CA  | . GLU GLU GLU B B 292 292 . | 0.1366 | 0.1165 | 0.0607 | 0.0155  | 0.0189  |   |
| 0.0092 | 1   | .   |                             |        |        |        |         |         |   |
| 5463   | CB  | CB  | . GLU GLU GLU B B 292 292 . | 0.1509 | 0.0872 | 0.0677 | 0.0174  | 0.0148  |   |
| 0.0180 | 1   | .   |                             |        |        |        |         |         |   |
| 5464   | CG  | CG  | . GLU GLU GLU B B 292 292 . | 0.1556 | 0.1181 | 0.0600 | 0.0127  | 0.0189  |   |
| 0.0103 | 1   | .   |                             |        |        |        |         |         |   |
| 5465   | CD  | CD  | . GLU GLU GLU B B 292 292 . | 0.2344 | 0.1497 | 0.1363 | 0.0113  | 0.0257  | - |
| 0.0135 | 1   | .   |                             |        |        |        |         |         |   |
| 5466   | OE1 | OE1 | . GLU GLU GLU B B 292 292 . | 0.2143 | 0.1676 | 0.1307 | 0.0221  | 0.0335  | - |
| 0.0199 | 1   | .   |                             |        |        |        |         |         |   |
| 5467   | OE2 | OE2 | . GLU GLU GLU B B 292 292 . | 0.2069 | 0.1385 | 0.1420 | 0.0122  | 0.0484  | - |
| 0.0195 | 1   | .   |                             |        |        |        |         |         |   |
| 5468   | C   | C   | . GLU GLU GLU B B 292 292 . | 0.1200 | 0.1223 | 0.0889 | 0.0072  | 0.0010  | - |
| 0.0040 | 1   | .   |                             |        |        |        |         |         |   |
| 5469   | O   | O   | . GLU GLU GLU B B 292 292 . | 0.1612 | 0.1200 | 0.1283 | 0.0094  | -0.0124 | - |
| 0.0126 | 1   | .   |                             |        |        |        |         |         |   |
| 5470   | N   | N   | . ASP ASP ASP B B 293 293 . | 0.1755 | 0.1012 | 0.0928 | 0.0110  | -0.0015 | - |
| 0.0052 | 1   | .   |                             |        |        |        |         |         |   |
| 5471   | CA  | CA  | . ASP ASP ASP B B 293 293 . | 0.1679 | 0.1193 | 0.1017 | 0.0066  | 0.0088  | - |
| 0.0215 | 1   | .   |                             |        |        |        |         |         |   |
| 5472   | CB  | CB  | . ASP ASP ASP B B 293 293 . | 0.1928 | 0.1875 | 0.0910 | 0.0228  | 0.0279  | - |
| 0.0149 | 1   | .   |                             |        |        |        |         |         |   |
| 5473   | CG  | CG  | . ASP ASP ASP B B 293 293 . | 0.1610 | 0.1765 | 0.1460 | 0.0090  | -0.0128 |   |
| 0.0009 | 1   | .   |                             |        |        |        |         |         |   |
| 5474   | OD1 | OD1 | . ASP ASP ASP B B 293 293 . | 0.1657 | 0.1700 | 0.1350 | 0.0349  | -0.0092 |   |
| 0.0067 | 1   | .   |                             |        |        |        |         |         |   |
| 5475   | OD2 | OD2 | . ASP ASP ASP B B 293 293 . | 0.2132 | 0.1842 | 0.1111 | 0.0249  | 0.0159  | - |
| 0.0062 | 1   | .   |                             |        |        |        |         |         |   |
| 5476   | C   | C   | . ASP ASP ASP B B 293 293 . | 0.1650 | 0.1337 | 0.1318 | 0.0129  | -0.0074 | - |
| 0.0088 | 1   | .   |                             |        |        |        |         |         |   |
| 5477   | O   | O   | . ASP ASP ASP B B 293 293 . | 0.1644 | 0.1290 | 0.1187 | 0.0011  | -0.0022 | - |
| 0.0146 | 1   | .   |                             |        |        |        |         |         |   |
| 5478   | N   | N   | . PRO PRO PRO B B 294 294 . | 0.1627 | 0.1355 | 0.0928 | -0.0074 | -0.0112 | - |
| 0.0010 | 1   | .   |                             |        |        |        |         |         |   |
| 5479   | CA  | CA  | . PRO PRO PRO B B 294 294 . | 0.1721 | 0.1366 | 0.1073 | -0.0044 | -0.0097 | - |
| 0.0262 | 1   | .   |                             |        |        |        |         |         |   |
| 5480   | CB  | CB  | . PRO PRO PRO B B 294 294 . | 0.1698 | 0.1645 | 0.0879 | -0.0075 | -0.0358 | - |
| 0.0212 | 1   | .   |                             |        |        |        |         |         |   |
| 5481   | CG  | CG  | . PRO PRO PRO B B 294 294 . | 0.1497 | 0.1670 | 0.0897 | -0.0184 | 0.0227  | - |
| 0.0134 | 1   | .   |                             |        |        |        |         |         |   |
| 5482   | CD  | CD  | . PRO PRO PRO B B 294 294 . | 0.1924 | 0.1338 | 0.0957 | -0.0181 | -0.0020 | - |
| 0.0241 | 1   | .   |                             |        |        |        |         |         |   |
| 5483   | C   | C   | . PRO PRO PRO B B 294 294 . | 0.1572 | 0.1444 | 0.0911 | -0.0014 | -0.0259 | - |
| 0.0062 | 1   | .   |                             |        |        |        |         |         |   |
| 5484   | O   | O   | . PRO PRO PRO B B 294 294 . | 0.1771 | 0.1271 | 0.1220 | -0.0223 | -0.0080 | - |
| 0.0175 | 1   | .   |                             |        |        |        |         |         |   |
| 5485   | N   | N   | . PHE PHE PHE B B 295 295 . | 0.1873 | 0.1331 | 0.0930 | 0.0117  | -0.0132 | - |
| 0.0133 | 1   | .   |                             |        |        |        |         |         |   |
| 5486   | CA  | CA  | . PHE PHE PHE B B 295 295 . | 0.1760 | 0.1215 | 0.0945 | 0.0177  | -0.0081 | - |
| 0.0024 | 1   | .   |                             |        |        |        |         |         |   |
| 5487   | CB  | CB  | . PHE PHE PHE B B 295 295 . | 0.1762 | 0.1343 | 0.0766 | 0.0111  | -0.0063 |   |
| 0.0155 | 1   | .   |                             |        |        |        |         |         |   |
| 5488   | CG  | CG  | . PHE PHE PHE B B 295 295 . | 0.1299 | 0.1192 | 0.1151 | 0.0088  | -0.0111 |   |
| 0.0084 | 1   | .   |                             |        |        |        |         |         |   |



|        |     |     |                             |        |        |        |         |         |   |
|--------|-----|-----|-----------------------------|--------|--------|--------|---------|---------|---|
| 5519   | C   | C   | . ASP ASP ASP B B 298 298 . | 0.1484 | 0.1218 | 0.1217 | 0.0107  | -0.0055 | - |
| 0.0121 | 1   | .   |                             |        |        |        |         |         |   |
| 5520   | O   | O   | . ASP ASP ASP B B 298 298 . | 0.1858 | 0.0986 | 0.1384 | 0.0029  | -0.0192 |   |
| 0.0057 | 1   | .   |                             |        |        |        |         |         |   |
| 5521   | N   | N   | . ASP ASP ASP B B 299 299 . | 0.1997 | 0.1462 | 0.1481 | 0.0135  | -0.0119 | - |
| 0.0038 | 1   | .   |                             |        |        |        |         |         |   |
| 5522   | CA  | CA  | . ASP ASP ASP B B 299 299 . | 0.1648 | 0.1081 | 0.1362 | -0.0104 | -0.0058 | - |
| 0.0012 | 1   | .   |                             |        |        |        |         |         |   |
| 5523   | CB  | CB  | . ASP ASP ASP B B 299 299 . | 0.1588 | 0.1289 | 0.1416 | -0.0141 | 0.0129  | - |
| 0.0048 | 1   | .   |                             |        |        |        |         |         |   |
| 5524   | CG  | CG  | . ASP ASP ASP B B 299 299 . | 0.1551 | 0.1145 | 0.1317 | -0.0270 | -0.0063 | - |
| 0.0093 | 1   | .   |                             |        |        |        |         |         |   |
| 5525   | OD1 | OD1 | . ASP ASP ASP B B 299 299 . | 0.2135 | 0.1372 | 0.1589 | 0.0039  | -0.0260 | - |
| 0.0064 | 1   | .   |                             |        |        |        |         |         |   |
| 5526   | OD2 | OD2 | . ASP ASP ASP B B 299 299 . | 0.1926 | 0.1420 | 0.1918 | 0.0049  | -0.0271 | - |
| 0.0080 | 1   | .   |                             |        |        |        |         |         |   |
| 5527   | C   | C   | . ASP ASP ASP B B 299 299 . | 0.1689 | 0.1475 | 0.1509 | 0.0061  | -0.0143 | - |
| 0.0046 | 1   | .   |                             |        |        |        |         |         |   |
| 5528   | O   | O   | . ASP ASP ASP B B 299 299 . | 0.1725 | 0.1217 | 0.1168 | -0.0072 | -0.0028 |   |
| 0.0118 | 1   | .   |                             |        |        |        |         |         |   |
| 5529   | N   | N   | . TRP TRP TRP B B 300 300 . | 0.1604 | 0.1443 | 0.1263 | -0.0129 | -0.0129 | - |
| 0.0090 | 1   | .   |                             |        |        |        |         |         |   |
| 5530   | CA  | CA  | . TRP TRP TRP B B 300 300 . | 0.1544 | 0.1533 | 0.1052 | -0.0069 | -0.0078 | - |
| 0.0283 | 1   | .   |                             |        |        |        |         |         |   |
| 5531   | CB  | CB  | . TRP TRP TRP B B 300 300 . | 0.1491 | 0.1678 | 0.1025 | -0.0015 | 0.0233  | - |
| 0.0237 | 1   | .   |                             |        |        |        |         |         |   |
| 5532   | CG  | CG  | . TRP TRP TRP B B 300 300 . | 0.1670 | 0.1258 | 0.1087 | 0.0267  | 0.0011  | - |
| 0.0065 | 1   | .   |                             |        |        |        |         |         |   |
| 5533   | CD1 | CD1 | . TRP TRP TRP B B 300 300 . | 0.1886 | 0.1398 | 0.1008 | 0.0306  | -0.0218 | - |
| 0.0422 | 1   | .   |                             |        |        |        |         |         |   |
| 5534   | NE1 | NE1 | . TRP TRP TRP B B 300 300 . | 0.1941 | 0.1455 | 0.1950 | -0.0072 | -0.0042 | - |
| 0.0107 | 1   | .   |                             |        |        |        |         |         |   |
| 5535   | CE2 | CE2 | . TRP TRP TRP B B 300 300 . | 0.1892 | 0.1040 | 0.1284 | 0.0076  | -0.0131 |   |
| 0.0080 | 1   | .   |                             |        |        |        |         |         |   |
| 5536   | CD2 | CD2 | . TRP TRP TRP B B 300 300 . | 0.2192 | 0.1311 | 0.1226 | -0.0032 | 0.0077  | - |
| 0.0045 | 1   | .   |                             |        |        |        |         |         |   |
| 5537   | CE3 | CE3 | . TRP TRP TRP B B 300 300 . | 0.1936 | 0.1120 | 0.1882 | 0.0038  | 0.0225  |   |
| 0.0006 | 1   | .   |                             |        |        |        |         |         |   |
| 5538   | CZ3 | CZ3 | . TRP TRP TRP B B 300 300 . | 0.1861 | 0.1420 | 0.1317 | -0.0057 | 0.0341  |   |
| 0.0174 | 1   | .   |                             |        |        |        |         |         |   |
| 5539   | CH2 | CH2 | . TRP TRP TRP B B 300 300 . | 0.2064 | 0.1935 | 0.1820 | 0.0528  | 0.0127  | - |
| 0.0063 | 1   | .   |                             |        |        |        |         |         |   |
| 5540   | CZ2 | CZ2 | . TRP TRP TRP B B 300 300 . | 0.2092 | 0.1908 | 0.1569 | -0.0021 | -0.0295 |   |
| 0.0246 | 1   | .   |                             |        |        |        |         |         |   |
| 5541   | C   | C   | . TRP TRP TRP B B 300 300 . | 0.1804 | 0.1606 | 0.1438 | -0.0108 | 0.0132  | - |
| 0.0087 | 1   | .   |                             |        |        |        |         |         |   |
| 5542   | O   | O   | . TRP TRP TRP B B 300 300 . | 0.1771 | 0.1380 | 0.1183 | -0.0181 | -0.0150 | - |
| 0.0108 | 1   | .   |                             |        |        |        |         |         |   |
| 5543   | N   | N   | . ALA ALA ALA B B 301 301 . | 0.1851 | 0.1390 | 0.1196 | -0.0114 | 0.0107  | - |
| 0.0021 | 1   | .   |                             |        |        |        |         |         |   |
| 5544   | CA  | CA  | . ALA ALA ALA B B 301 301 . | 0.2067 | 0.1438 | 0.1266 | 0.0029  | 0.0028  |   |
| 0.0041 | 1   | .   |                             |        |        |        |         |         |   |
| 5545   | CB  | CB  | . ALA ALA ALA B B 301 301 . | 0.2177 | 0.1304 | 0.1415 | -0.0251 | -0.0189 |   |
| 0.0172 | 1   | .   |                             |        |        |        |         |         |   |
| 5546   | C   | C   | . ALA ALA ALA B B 301 301 . | 0.2015 | 0.1565 | 0.1346 | 0.0014  | -0.0007 |   |
| 0.0054 | 1   | .   |                             |        |        |        |         |         |   |
| 5547   | O   | O   | . ALA ALA ALA B B 301 301 . | 0.2421 | 0.1226 | 0.1231 | 0.0168  | 0.0190  | - |
| 0.0043 | 1   | .   |                             |        |        |        |         |         |   |
| 5548   | N   | N   | . ALA ALA ALA B B 302 302 . | 0.1436 | 0.1519 | 0.1049 | 0.0038  | -0.0203 |   |
| 0.0048 | 1   | .   |                             |        |        |        |         |         |   |

























|        |     |     |                             |        |        |        |         |         |   |
|--------|-----|-----|-----------------------------|--------|--------|--------|---------|---------|---|
| 5849   | O   | O   | . LEU LEU LEU B B 341 341 . | 0.1891 | 0.1351 | 0.1504 | 0.0506  | 0.0098  |   |
| 0.0120 | 1   | .   |                             |        |        |        |         |         |   |
| 5850   | N   | N   | . LYS LYS LYS B B 342 342 . | 0.2056 | 0.1390 | 0.1270 | 0.0080  | 0.0189  |   |
| 0.0000 | 1   | .   |                             |        |        |        |         |         |   |
| 5851   | CA  | CA  | . LYS LYS LYS B B 342 342 . | 0.1882 | 0.1684 | 0.1283 | 0.0122  | 0.0081  |   |
| 0.0233 | 1   | .   |                             |        |        |        |         |         |   |
| 5852   | CB  | CB  | . LYS LYS LYS B B 342 342 . | 0.1940 | 0.1872 | 0.1670 | 0.0197  | 0.0065  | - |
| 0.0139 | 1   | .   |                             |        |        |        |         |         |   |
| 5853   | CG  | CG  | . LYS LYS LYS B B 342 342 . | 0.1828 | 0.1968 | 0.1456 | 0.0283  | 0.0132  |   |
| 0.0143 | 1   | .   |                             |        |        |        |         |         |   |
| 5854   | CD  | CD  | . LYS LYS LYS B B 342 342 . | 0.1519 | 0.1791 | 0.2078 | 0.0202  | 0.0142  |   |
| 0.0475 | 1   | .   |                             |        |        |        |         |         |   |
| 5855   | CE  | CE  | . LYS LYS LYS B B 342 342 . | 0.1671 | 0.2176 | 0.1553 | 0.0050  | 0.0301  |   |
| 0.0623 | 1   | .   |                             |        |        |        |         |         |   |
| 5856   | NZ  | NZ  | . LYS LYS LYS B B 342 342 . | 0.2125 | 0.2333 | 0.2516 | 0.0122  | 0.0231  |   |
| 0.0334 | 1   | .   |                             |        |        |        |         |         |   |
| 5857   | C   | C   | . LYS LYS LYS B B 342 342 . | 0.1913 | 0.1580 | 0.1572 | 0.0258  | 0.0051  |   |
| 0.0076 | 1   | .   |                             |        |        |        |         |         |   |
| 5858   | O   | O   | . LYS LYS LYS B B 342 342 . | 0.2068 | 0.1293 | 0.1435 | 0.0393  | 0.0078  |   |
| 0.0268 | 1   | .   |                             |        |        |        |         |         |   |
| 5859   | N   | N   | . VAL VAL VAL B B 343 343 . | 0.1864 | 0.1326 | 0.1474 | 0.0180  | 0.0181  |   |
| 0.0042 | 1   | .   |                             |        |        |        |         |         |   |
| 5860   | CA  | CA  | . VAL VAL VAL B B 343 343 . | 0.1693 | 0.1273 | 0.1790 | -0.0074 | 0.0208  | - |
| 0.0069 | 1   | .   |                             |        |        |        |         |         |   |
| 5861   | CB  | CB  | . VAL VAL VAL B B 343 343 . | 0.2240 | 0.1317 | 0.1764 | -0.0220 | 0.0011  | - |
| 0.0152 | 1   | .   |                             |        |        |        |         |         |   |
| 5862   | CG1 | CG1 | . VAL VAL VAL B B 343 343 . | 0.2183 | 0.1351 | 0.2466 | -0.0360 | -0.0026 | - |
| 0.0146 | 1   | .   |                             |        |        |        |         |         |   |
| 5863   | CG2 | CG2 | . VAL VAL VAL B B 343 343 . | 0.1862 | 0.2060 | 0.1863 | -0.0189 | 0.0151  |   |
| 0.0189 | 1   | .   |                             |        |        |        |         |         |   |
| 5864   | C   | C   | . VAL VAL VAL B B 343 343 . | 0.1829 | 0.1517 | 0.1531 | 0.0059  | 0.0143  | - |
| 0.0086 | 1   | .   |                             |        |        |        |         |         |   |
| 5865   | O   | O   | . VAL VAL VAL B B 343 343 . | 0.1555 | 0.1867 | 0.2016 | 0.0106  | -0.0066 | - |
| 0.0017 | 1   | .   |                             |        |        |        |         |         |   |
| 5866   | N   | N   | . ASN ASN ASN B B 344 344 . | 0.1780 | 0.1200 | 0.1592 | 0.0126  | 0.0070  | - |
| 0.0026 | 1   | .   |                             |        |        |        |         |         |   |
| 5867   | CA  | CA  | . ASN ASN ASN B B 344 344 . | 0.2102 | 0.1373 | 0.1408 | 0.0200  | 0.0062  | - |
| 0.0014 | 1   | .   |                             |        |        |        |         |         |   |
| 5868   | CB  | CB  | . ASN ASN ASN B B 344 344 . | 0.1777 | 0.1709 | 0.1345 | 0.0173  | 0.0124  | - |
| 0.0188 | 1   | .   |                             |        |        |        |         |         |   |
| 5869   | CG  | CG  | . ASN ASN ASN B B 344 344 . | 0.1782 | 0.1482 | 0.1558 | 0.0309  | 0.0209  |   |
| 0.0031 | 1   | .   |                             |        |        |        |         |         |   |
| 5870   | OD1 | OD1 | . ASN ASN ASN B B 344 344 . | 0.2038 | 0.1837 | 0.1724 | 0.0333  | 0.0393  | - |
| 0.0011 | 1   | .   |                             |        |        |        |         |         |   |
| 5871   | ND2 | ND2 | . ASN ASN ASN B B 344 344 . | 0.2135 | 0.1703 | 0.2230 | -0.0003 | -0.0014 | - |
| 0.0222 | 1   | .   |                             |        |        |        |         |         |   |
| 5872   | C   | C   | . ASN ASN ASN B B 344 344 . | 0.2089 | 0.1224 | 0.1423 | 0.0091  | 0.0146  |   |
| 0.0017 | 1   | .   |                             |        |        |        |         |         |   |
| 5873   | O   | O   | . ASN ASN ASN B B 344 344 . | 0.2623 | 0.1569 | 0.1737 | 0.0172  | 0.0182  | - |
| 0.0004 | 1   | .   |                             |        |        |        |         |         |   |
| 5874   | N   | N   | . GLN GLN GLN B B 345 345 . | 0.2074 | 0.0960 | 0.1260 | 0.0218  | 0.0202  |   |
| 0.0330 | 1   | .   |                             |        |        |        |         |         |   |
| 5875   | CA  | CA  | . GLN GLN GLN B B 345 345 . | 0.1873 | 0.1148 | 0.1349 | 0.0219  | 0.0215  |   |
| 0.0279 | 1   | .   |                             |        |        |        |         |         |   |
| 5876   | CB  | CB  | . GLN GLN GLN B B 345 345 . | 0.1454 | 0.1135 | 0.1032 | 0.0173  | 0.0237  |   |
| 0.0425 | 1   | .   |                             |        |        |        |         |         |   |
| 5877   | CG  | CG  | . GLN GLN GLN B B 345 345 . | 0.1607 | 0.1434 | 0.1372 | 0.0206  | 0.0327  | - |
| 0.0109 | 1   | .   |                             |        |        |        |         |         |   |
| 5878   | CD  | CD  | . GLN GLN GLN B B 345 345 . | 0.1288 | 0.1234 | 0.1376 | -0.0097 | 0.0148  |   |
| 0.0378 | 1   | .   |                             |        |        |        |         |         |   |







|        |     |     |                             |        |        |        |         |           |
|--------|-----|-----|-----------------------------|--------|--------|--------|---------|-----------|
| 5969   | CG  | CG  | . LEU LEU LEU B B 358 358 . | 0.2473 | 0.2296 | 0.2331 | -0.0078 | -0.0167   |
| 0.0211 | 1   | .   |                             |        |        |        |         |           |
| 5970   | CD1 | CD1 | . LEU LEU LEU B B 358 358 . | 0.2753 | 0.2970 | 0.2221 | 0.0006  | -0.0731   |
| 0.0457 | 1   | .   |                             |        |        |        |         |           |
| 5971   | CD2 | CD2 | . LEU LEU LEU B B 358 358 . | 0.2628 | 0.1517 | 0.2600 | 0.0180  | 0.0150    |
| 0.0209 | 1   | .   |                             |        |        |        |         |           |
| 5972   | C   | C   | . LEU LEU LEU B B 358 358 . | 0.2056 | 0.1863 | 0.1742 | 0.0038  | -0.0272   |
| 0.0118 | 1   | .   |                             |        |        |        |         |           |
| 5973   | O   | O   | . LEU LEU LEU B B 358 358 . | 0.2341 | 0.1912 | 0.1558 | 0.0118  | -0.0291   |
| 0.0071 | 1   | .   |                             |        |        |        |         |           |
| 5974   | N   | N   | . ALA ALA ALA B B 359 359 . | 0.1857 | 0.1916 | 0.1630 | 0.0063  | -0.0127   |
| 0.0076 | 1   | .   |                             |        |        |        |         |           |
| 5975   | CA  | CA  | . ALA ALA ALA B B 359 359 . | 0.1698 | 0.1940 | 0.1676 | 0.0159  | -0.0254 - |
| 0.0054 | 1   | .   |                             |        |        |        |         |           |
| 5976   | CB  | CB  | . ALA ALA ALA B B 359 359 . | 0.2069 | 0.2073 | 0.1557 | 0.0135  | -0.0326   |
| 0.0146 | 1   | .   |                             |        |        |        |         |           |
| 5977   | C   | C   | . ALA ALA ALA B B 359 359 . | 0.2031 | 0.2031 | 0.1862 | -0.0102 | -0.0173   |
| 0.0031 | 1   | .   |                             |        |        |        |         |           |
| 5978   | O   | O   | . ALA ALA ALA B B 359 359 . | 0.2155 | 0.1882 | 0.1471 | -0.0036 | -0.0106 - |
| 0.0218 | 1   | .   |                             |        |        |        |         |           |
| 5979   | N   | N   | . GLN GLN GLN B B 360 360 . | 0.2279 | 0.2075 | 0.1844 | -0.0070 | -0.0252   |
| 0.0127 | 1   | .   |                             |        |        |        |         |           |
| 5980   | CA  | CA  | . GLN GLN GLN B B 360 360 . | 0.2333 | 0.1859 | 0.1741 | -0.0105 | -0.0297   |
| 0.0175 | 1   | .   |                             |        |        |        |         |           |
| 5981   | CB  | CB  | . GLN GLN GLN B B 360 360 . | 0.2574 | 0.1794 | 0.1826 | -0.0111 | -0.0293   |
| 0.0321 | 1   | .   |                             |        |        |        |         |           |
| 5982   | CG  | CG  | . GLN GLN GLN B B 360 360 . | 0.2667 | 0.2568 | 0.1444 | -0.0079 | -0.0440   |
| 0.0717 | 1   | .   |                             |        |        |        |         |           |
| 5983   | CD  | CD  | . GLN GLN GLN B B 360 360 . | 0.2694 | 0.2112 | 0.2122 | 0.0001  | -0.0186   |
| 0.0056 | 1   | .   |                             |        |        |        |         |           |
| 5984   | OE1 | OE1 | . GLN GLN GLN B B 360 360 . | 0.3950 | 0.2608 | 0.2689 | 0.0225  | -0.0888 - |
| 0.0167 | 1   | .   |                             |        |        |        |         |           |
| 5985   | NE2 | NE2 | . GLN GLN GLN B B 360 360 . | 0.2610 | 0.2161 | 0.1971 | -0.0211 | -0.0335   |
| 0.0655 | 1   | .   |                             |        |        |        |         |           |
| 5986   | C   | C   | . GLN GLN GLN B B 360 360 . | 0.2360 | 0.2106 | 0.1967 | -0.0128 | -0.0207   |
| 0.0003 | 1   | .   |                             |        |        |        |         |           |
| 5987   | O   | O   | . GLN GLN GLN B B 360 360 . | 0.2211 | 0.2675 | 0.1856 | -0.0143 | -0.0083   |
| 0.0010 | 1   | .   |                             |        |        |        |         |           |
| 5988   | N   | N   | . GLU GLU GLU B B 361 361 . | 0.1990 | 0.2240 | 0.1888 | -0.0042 | -0.0188   |
| 0.0081 | 1   | .   |                             |        |        |        |         |           |
| 5989   | CA  | CA  | . GLU GLU GLU B B 361 361 . | 0.2428 | 0.2549 | 0.2028 | -0.0082 | -0.0127   |
| 0.0242 | 1   | .   |                             |        |        |        |         |           |
| 5990   | CB  | CB  | . GLU GLU GLU B B 361 361 . | 0.2347 | 0.3014 | 0.2112 | -0.0227 | -0.0053   |
| 0.0245 | 1   | .   |                             |        |        |        |         |           |
| 5991   | CG  | CG  | . GLU GLU GLU B B 361 361 . | 0.3296 | 0.3630 | 0.3514 | 0.0032  | 0.0342    |
| 0.0167 | 1   | .   |                             |        |        |        |         |           |
| 5992   | CD  | CD  | . GLU GLU GLU B B 361 361 . | 0.4212 | 0.5438 | 0.5370 | 0.0462  | 0.0514    |
| 0.0088 | 1   | .   |                             |        |        |        |         |           |
| 5993   | OE1 | OE1 | . GLU GLU GLU B B 361 361 . | 0.4523 | 0.5725 | 0.5856 | 0.1329  | -0.0031   |
| 0.0423 | 1   | .   |                             |        |        |        |         |           |
| 5994   | OE2 | OE2 | . GLU GLU GLU B B 361 361 . | 0.5025 | 0.6599 | 0.6041 | -0.0071 | 0.0556    |
| 0.0310 | 1   | .   |                             |        |        |        |         |           |
| 5995   | C   | C   | . GLU GLU GLU B B 361 361 . | 0.2316 | 0.2365 | 0.1803 | -0.0053 | -0.0254   |
| 0.0165 | 1   | .   |                             |        |        |        |         |           |
| 5996   | O   | O   | . GLU GLU GLU B B 361 361 . | 0.2675 | 0.2736 | 0.1635 | -0.0118 | -0.0536   |
| 0.0353 | 1   | .   |                             |        |        |        |         |           |
| 5997   | N   | N   | . ASN ASN ASN B B 362 362 . | 0.2198 | 0.2055 | 0.1701 | -0.0029 | -0.0205   |
| 0.0093 | 1   | .   |                             |        |        |        |         |           |
| 5998   | CA  | CA  | . ASN ASN ASN B B 362 362 . | 0.2207 | 0.2303 | 0.1742 | 0.0075  | -0.0276   |
| 0.0036 | 1   | .   |                             |        |        |        |         |           |























|        |     |     |                             |        |        |        |         |         |   |
|--------|-----|-----|-----------------------------|--------|--------|--------|---------|---------|---|
| 6299   | C   | C   | . ARG ARG ARG B B 402 402 . | 0.1214 | 0.1104 | 0.0839 | 0.0000  | 0.0046  | - |
| 0.0231 | 1   | .   |                             |        |        |        |         |         |   |
| 6300   | O   | O   | . ARG ARG ARG B B 402 402 . | 0.1356 | 0.1229 | 0.0985 | -0.0093 | 0.0066  | - |
| 0.0163 | 1   | .   |                             |        |        |        |         |         |   |
| 6301   | N   | N   | . LEU LEU LEU B B 403 403 . | 0.1487 | 0.0910 | 0.1027 | 0.0145  | 0.0139  | - |
| 0.0108 | 1   | .   |                             |        |        |        |         |         |   |
| 6302   | CA  | CA  | . LEU LEU LEU B B 403 403 . | 0.1279 | 0.0978 | 0.1219 | 0.0027  | -0.0096 | - |
| 0.0022 | 1   | .   |                             |        |        |        |         |         |   |
| 6303   | CB  | CB  | . LEU LEU LEU B B 403 403 . | 0.1309 | 0.1212 | 0.1628 | 0.0193  | -0.0072 | - |
| 0.0104 | 1   | .   |                             |        |        |        |         |         |   |
| 6304   | CG  | CG  | . LEU LEU LEU B B 403 403 . | 0.1107 | 0.1093 | 0.1275 | -0.0063 | 0.0182  | - |
| 0.0244 | 1   | .   |                             |        |        |        |         |         |   |
| 6305   | CD1 | CD1 | . LEU LEU LEU B B 403 403 . | 0.2237 | 0.1404 | 0.1146 | -0.0164 | 0.0208  | - |
| 0.0237 | 1   | .   |                             |        |        |        |         |         |   |
| 6306   | CD2 | CD2 | . LEU LEU LEU B B 403 403 . | 0.1552 | 0.1382 | 0.1592 | -0.0338 | -0.0113 | - |
| 0.0208 | 1   | .   |                             |        |        |        |         |         |   |
| 6307   | C   | C   | . LEU LEU LEU B B 403 403 . | 0.1273 | 0.1107 | 0.1257 | 0.0071  | -0.0051 | - |
| 0.0033 | 1   | .   |                             |        |        |        |         |         |   |
| 6308   | O   | O   | . LEU LEU LEU B B 403 403 . | 0.1456 | 0.1153 | 0.1233 | 0.0083  | -0.0011 | - |
| 0.0217 | 1   | .   |                             |        |        |        |         |         |   |
| 6309   | N   | N   | . ALA ALA ALA B B 404 404 . | 0.1185 | 0.1254 | 0.0735 | -0.0063 | -0.0042 | - |
| 0.0007 | 1   | .   |                             |        |        |        |         |         |   |
| 6310   | CA  | CA  | . ALA ALA ALA B B 404 404 . | 0.1243 | 0.1351 | 0.0848 | -0.0004 | -0.0261 | - |
| 0.0085 | 1   | .   |                             |        |        |        |         |         |   |
| 6311   | CB  | CB  | . ALA ALA ALA B B 404 404 . | 0.1279 | 0.1532 | 0.1294 | -0.0023 | 0.0025  | - |
| 0.0243 | 1   | .   |                             |        |        |        |         |         |   |
| 6312   | C   | C   | . ALA ALA ALA B B 404 404 . | 0.1361 | 0.1174 | 0.0921 | -0.0130 | -0.0124 | - |
| 0.0006 | 1   | .   |                             |        |        |        |         |         |   |
| 6313   | O   | O   | . ALA ALA ALA B B 404 404 . | 0.1507 | 0.1476 | 0.1275 | -0.0129 | -0.0167 | - |
| 0.0100 | 1   | .   |                             |        |        |        |         |         |   |
| 6314   | N   | N   | . LYS LYS LYS B B 405 405 . | 0.1420 | 0.1100 | 0.0973 | 0.0033  | -0.0058 | - |
| 0.0077 | 1   | .   |                             |        |        |        |         |         |   |
| 6315   | CA  | CA  | . LYS LYS LYS B B 405 405 . | 0.1482 | 0.0831 | 0.0610 | 0.0051  | -0.0142 | - |
| 0.0069 | 1   | .   |                             |        |        |        |         |         |   |
| 6316   | CB  | CB  | . LYS LYS LYS B B 405 405 . | 0.1533 | 0.0507 | 0.0866 | 0.0061  | -0.0018 | - |
| 0.0010 | 1   | .   |                             |        |        |        |         |         |   |
| 6317   | CG  | CG  | . LYS LYS LYS B B 405 405 . | 0.1521 | 0.1165 | 0.1110 | 0.0141  | -0.0185 | - |
| 0.0191 | 1   | .   |                             |        |        |        |         |         |   |
| 6318   | CD  | CD  | . LYS LYS LYS B B 405 405 . | 0.1624 | 0.0813 | 0.0662 | 0.0130  | -0.0242 | - |
| 0.0114 | 1   | .   |                             |        |        |        |         |         |   |
| 6319   | CE  | CE  | . LYS LYS LYS B B 405 405 . | 0.1835 | 0.0884 | 0.1117 | 0.0066  | -0.0328 | - |
| 0.0070 | 1   | .   |                             |        |        |        |         |         |   |
| 6320   | NZ  | NZ  | . LYS LYS LYS B B 405 405 . | 0.1371 | 0.1141 | 0.1054 | 0.0064  | 0.0083  | - |
| 0.0011 | 1   | .   |                             |        |        |        |         |         |   |
| 6321   | C   | C   | . LYS LYS LYS B B 405 405 . | 0.1375 | 0.1044 | 0.1001 | 0.0086  | -0.0091 | - |
| 0.0068 | 1   | .   |                             |        |        |        |         |         |   |
| 6322   | O   | O   | . LYS LYS LYS B B 405 405 . | 0.1477 | 0.1034 | 0.0907 | -0.0074 | -0.0111 | - |
| 0.0032 | 1   | .   |                             |        |        |        |         |         |   |
| 6323   | N   | N   | . TYR TYR TYR B B 406 406 . | 0.1380 | 0.1052 | 0.0842 | 0.0008  | 0.0128  | - |
| 0.0001 | 1   | .   |                             |        |        |        |         |         |   |
| 6324   | CA  | CA  | . TYR TYR TYR B B 406 406 . | 0.1358 | 0.1027 | 0.1137 | 0.0071  | 0.0142  | - |
| 0.0047 | 1   | .   |                             |        |        |        |         |         |   |
| 6325   | CB  | CB  | . TYR TYR TYR B B 406 406 . | 0.1213 | 0.0938 | 0.1233 | 0.0193  | 0.0192  | - |
| 0.0143 | 1   | .   |                             |        |        |        |         |         |   |
| 6326   | CG  | CG  | . TYR TYR TYR B B 406 406 . | 0.1085 | 0.1086 | 0.1118 | 0.0056  | 0.0144  | - |
| 0.0057 | 1   | .   |                             |        |        |        |         |         |   |
| 6327   | CD1 | CD1 | . TYR TYR TYR B B 406 406 . | 0.1490 | 0.1083 | 0.1100 | 0.0330  | 0.0195  | - |
| 0.0092 | 1   | .   |                             |        |        |        |         |         |   |
| 6328   | CE1 | CE1 | . TYR TYR TYR B B 406 406 . | 0.1638 | 0.1015 | 0.1168 | -0.0297 | -0.0024 | - |
| 0.0068 | 1   | .   |                             |        |        |        |         |         |   |



|        |     |     |                             |        |        |        |         |         |   |
|--------|-----|-----|-----------------------------|--------|--------|--------|---------|---------|---|
| 6329   | CZ  | CZ  | . TYR TYR TYR B B 406 406 . | 0.1299 | 0.1153 | 0.1003 | 0.0209  | 0.0035  |   |
| 0.0052 | 1   | .   |                             |        |        |        |         |         |   |
| 6330   | OH  | OH  | . TYR TYR TYR B B 406 406 . | 0.1912 | 0.1298 | 0.1371 | 0.0190  | 0.0294  |   |
| 0.0291 | 1   | .   |                             |        |        |        |         |         |   |
| 6331   | CE2 | CE2 | . TYR TYR TYR B B 406 406 . | 0.1479 | 0.0931 | 0.1278 | 0.0345  | -0.0001 | - |
| 0.0231 | 1   | .   |                             |        |        |        |         |         |   |
| 6332   | CD2 | CD2 | . TYR TYR TYR B B 406 406 . | 0.1755 | 0.1204 | 0.1190 | 0.0027  | 0.0167  | - |
| 0.0108 | 1   | .   |                             |        |        |        |         |         |   |
| 6333   | C   | C   | . TYR TYR TYR B B 406 406 . | 0.1646 | 0.0918 | 0.0991 | 0.0001  | -0.0073 |   |
| 0.0086 | 1   | .   |                             |        |        |        |         |         |   |
| 6334   | O   | O   | . TYR TYR TYR B B 406 406 . | 0.1791 | 0.1067 | 0.0870 | -0.0023 | -0.0096 |   |
| 0.0033 | 1   | .   |                             |        |        |        |         |         |   |
| 6335   | N   | N   | . ASN ASN ASN B B 407 407 . | 0.1562 | 0.0852 | 0.0899 | 0.0169  | 0.0085  |   |
| 0.0174 | 1   | .   |                             |        |        |        |         |         |   |
| 6336   | CA  | CA  | . ASN ASN ASN B B 407 407 . | 0.1248 | 0.1073 | 0.0647 | -0.0170 | -0.0030 | - |
| 0.0033 | 1   | .   |                             |        |        |        |         |         |   |
| 6337   | CB  | CB  | . ASN ASN ASN B B 407 407 . | 0.1026 | 0.1117 | 0.0634 | -0.0126 | -0.0058 | - |
| 0.0127 | 1   | .   |                             |        |        |        |         |         |   |
| 6338   | CG  | CG  | . ASN ASN ASN B B 407 407 . | 0.0863 | 0.1075 | 0.0834 | 0.0004  | -0.0022 |   |
| 0.0054 | 1   | .   |                             |        |        |        |         |         |   |
| 6339   | OD1 | OD1 | . ASN ASN ASN B B 407 407 . | 0.1543 | 0.1305 | 0.1019 | 0.0428  | -0.0103 |   |
| 0.0007 | 1   | .   |                             |        |        |        |         |         |   |
| 6340   | ND2 | ND2 | . ASN ASN ASN B B 407 407 . | 0.1371 | 0.0876 | 0.0884 | 0.0181  | -0.0276 | - |
| 0.0058 | 1   | .   |                             |        |        |        |         |         |   |
| 6341   | C   | C   | . ASN ASN ASN B B 407 407 . | 0.1352 | 0.1146 | 0.1010 | 0.0069  | -0.0126 | - |
| 0.0078 | 1   | .   |                             |        |        |        |         |         |   |
| 6342   | O   | O   | . ASN ASN ASN B B 407 407 . | 0.1573 | 0.1011 | 0.1223 | 0.0192  | -0.0323 |   |
| 0.0175 | 1   | .   |                             |        |        |        |         |         |   |
| 6343   | N   | N   | . GLN GLN GLN B B 408 408 . | 0.1253 | 0.1169 | 0.1083 | 0.0173  | 0.0093  | - |
| 0.0071 | 1   | .   |                             |        |        |        |         |         |   |
| 6344   | CA  | CA  | . GLN GLN GLN B B 408 408 . | 0.1352 | 0.1278 | 0.0952 | 0.0099  | 0.0085  | - |
| 0.0278 | 1   | .   |                             |        |        |        |         |         |   |
| 6345   | CB  | CB  | . GLN GLN GLN B B 408 408 . | 0.1250 | 0.1022 | 0.1215 | 0.0186  | -0.0112 | - |
| 0.0073 | 1   | .   |                             |        |        |        |         |         |   |
| 6346   | CG  | CG  | . GLN GLN GLN B B 408 408 . | 0.1256 | 0.1331 | 0.1295 | 0.0099  | 0.0139  | - |
| 0.0084 | 1   | .   |                             |        |        |        |         |         |   |
| 6347   | CD  | CD  | . GLN GLN GLN B B 408 408 . | 0.1762 | 0.2106 | 0.2035 | -0.0150 | -0.0048 |   |
| 0.0338 | 1   | .   |                             |        |        |        |         |         |   |
| 6348   | OE1 | OE1 | . GLN GLN GLN B B 408 408 . | 0.2257 | 0.1538 | 0.2055 | 0.0629  | 0.0113  |   |
| 0.0511 | 1   | .   |                             |        |        |        |         |         |   |
| 6349   | NE2 | NE2 | . GLN GLN GLN B B 408 408 . | 0.1795 | 0.2431 | 0.2242 | 0.0273  | 0.0068  | - |
| 0.0077 | 1   | .   |                             |        |        |        |         |         |   |
| 6350   | C   | C   | . GLN GLN GLN B B 408 408 . | 0.1491 | 0.1225 | 0.1169 | -0.0012 | -0.0103 | - |
| 0.0059 | 1   | .   |                             |        |        |        |         |         |   |
| 6351   | O   | O   | . GLN GLN GLN B B 408 408 . | 0.1346 | 0.1323 | 0.1163 | -0.0102 | -0.0179 |   |
| 0.0000 | 1   | .   |                             |        |        |        |         |         |   |
| 6352   | N   | N   | . LEU LEU LEU B B 409 409 . | 0.1319 | 0.1133 | 0.0916 | 0.0088  | -0.0014 | - |
| 0.0076 | 1   | .   |                             |        |        |        |         |         |   |
| 6353   | CA  | CA  | . LEU LEU LEU B B 409 409 . | 0.1572 | 0.0752 | 0.1084 | 0.0014  | 0.0011  | - |
| 0.0121 | 1   | .   |                             |        |        |        |         |         |   |
| 6354   | CB  | CB  | . LEU LEU LEU B B 409 409 . | 0.1291 | 0.0762 | 0.0859 | 0.0313  | 0.0216  |   |
| 0.0068 | 1   | .   |                             |        |        |        |         |         |   |
| 6355   | CG  | CG  | . LEU LEU LEU B B 409 409 . | 0.1461 | 0.1111 | 0.1565 | 0.0026  | -0.0217 |   |
| 0.0123 | 1   | .   |                             |        |        |        |         |         |   |
| 6356   | CD1 | CD1 | . LEU LEU LEU B B 409 409 . | 0.1763 | 0.1390 | 0.1375 | -0.0060 | 0.0194  |   |
| 0.0443 | 1   | .   |                             |        |        |        |         |         |   |
| 6357   | CD2 | CD2 | . LEU LEU LEU B B 409 409 . | 0.1214 | 0.1205 | 0.1266 | 0.0313  | -0.0149 | - |
| 0.0027 | 1   | .   |                             |        |        |        |         |         |   |
| 6358   | C   | C   | . LEU LEU LEU B B 409 409 . | 0.1447 | 0.0922 | 0.1358 | 0.0071  | -0.0282 |   |
| 0.0097 | 1   | .   |                             |        |        |        |         |         |   |





|        |    |    |                             |        |        |        |         |         |   |
|--------|----|----|-----------------------------|--------|--------|--------|---------|---------|---|
| 6419   | O  | O  | . LEU LEU LEU B B 416 416 . | 0.3342 | 0.2777 | 0.2631 | -0.0023 | -0.0958 | - |
| 0.0245 | 1  | .  |                             |        |        |        |         |         |   |
| 6420   | N  | N  | . GLY GLY GLY B B 417 417 . | 0.3360 | 0.2857 | 0.2727 | -0.0073 | -0.0584 | - |
| 0.0247 | 1  | .  |                             |        |        |        |         |         |   |
| 6421   | CA | CA | . GLY GLY GLY B B 417 417 . | 0.3877 | 0.3387 | 0.3146 | -0.0065 | -0.0376 | - |
| 0.0317 | 1  | .  |                             |        |        |        |         |         |   |
| 6422   | C  | C  | . GLY GLY GLY B B 417 417 . | 0.4234 | 0.3523 | 0.3344 | -0.0250 | -0.0270 | - |
| 0.0492 | 1  | .  |                             |        |        |        |         |         |   |
| 6423   | O  | O  | . GLY GLY GLY B B 417 417 . | 0.4278 | 0.3329 | 0.2849 | -0.0319 | -0.0191 | - |
| 0.0620 | 1  | .  |                             |        |        |        |         |         |   |
| 6424   | N  | N  | . ASP ASP ASP B B 418 418 . | 0.4687 | 0.3703 | 0.3766 | -0.0254 | -0.0333 | - |
| 0.0401 | 1  | .  |                             |        |        |        |         |         |   |
| 6425   | CA | CA | . ASP ASP ASP B B 418 418 . | 0.4935 | 0.4029 | 0.3954 | -0.0253 | -0.0334 | - |
| 0.0316 | 1  | .  |                             |        |        |        |         |         |   |
| 6426   | CB | CB | . ASP ASP ASP B B 418 418 . | 0.5102 | 0.3884 | 0.4123 | -0.0372 | -0.0397 | - |
| 0.0258 | 1  | .  |                             |        |        |        |         |         |   |
| 6427   | C  | C  | . ASP ASP ASP B B 418 418 . | 0.4877 | 0.4160 | 0.4037 | -0.0389 | -0.0138 | - |
| 0.0213 | 1  | .  |                             |        |        |        |         |         |   |
| 6428   | O  | O  | . ASP ASP ASP B B 418 418 . | 0.5380 | 0.4562 | 0.4075 | -0.0585 | -0.0137 | - |
| 0.0278 | 1  | .  |                             |        |        |        |         |         |   |
| 6429   | N  | N  | . GLU GLU GLU B B 419 419 . | 0.4532 | 0.3974 | 0.3914 | -0.0432 | -0.0361 | - |
| 0.0182 | 1  | .  |                             |        |        |        |         |         |   |
| 6430   | CA | CA | . GLU GLU GLU B B 419 419 . | 0.4162 | 0.3817 | 0.3852 | -0.0451 | -0.0325 | - |
| 0.0029 | 1  | .  |                             |        |        |        |         |         |   |
| 6431   | CB | CB | . GLU GLU GLU B B 419 419 . | 0.3988 | 0.3950 | 0.4015 | -0.0497 | -0.0368 | - |
| 0.0129 | 1  | .  |                             |        |        |        |         |         |   |
| 6432   | CG | CG | . GLU GLU GLU B B 419 419 . | 0.4357 | 0.4362 | 0.4504 | -0.0587 | -0.0438 | - |
| 0.0085 | 1  | .  |                             |        |        |        |         |         |   |
| 6433   | C  | C  | . GLU GLU GLU B B 419 419 . | 0.3850 | 0.3661 | 0.3665 | -0.0337 | -0.0277 | - |
| 0.0073 | 1  | .  |                             |        |        |        |         |         |   |
| 6434   | O  | O  | . GLU GLU GLU B B 419 419 . | 0.3969 | 0.3645 | 0.3798 | -0.0501 | -0.0377 | - |
| 0.0262 | 1  | .  |                             |        |        |        |         |         |   |
| 6435   | N  | N  | . ALA ALA ALA B B 420 420 . | 0.3700 | 0.3425 | 0.3562 | -0.0321 | -0.0236 | - |
| 0.0022 | 1  | .  |                             |        |        |        |         |         |   |
| 6436   | CA | CA | . ALA ALA ALA B B 420 420 . | 0.3512 | 0.3424 | 0.3264 | -0.0227 | -0.0318 | - |
| 0.0043 | 1  | .  |                             |        |        |        |         |         |   |
| 6437   | CB | CB | . ALA ALA ALA B B 420 420 . | 0.3312 | 0.3580 | 0.3408 | -0.0147 | -0.0354 | - |
| 0.0043 | 1  | .  |                             |        |        |        |         |         |   |
| 6438   | C  | C  | . ALA ALA ALA B B 420 420 . | 0.3470 | 0.3166 | 0.3240 | -0.0191 | -0.0146 | - |
| 0.0141 | 1  | .  |                             |        |        |        |         |         |   |
| 6439   | O  | O  | . ALA ALA ALA B B 420 420 . | 0.4131 | 0.3601 | 0.3223 | -0.0224 | 0.0069  | - |
| 0.0060 | 1  | .  |                             |        |        |        |         |         |   |
| 6440   | N  | N  | . ARG ARG ARG B B 421 421 . | 0.3407 | 0.2873 | 0.2888 | -0.0230 | -0.0287 | - |
| 0.0311 | 1  | .  |                             |        |        |        |         |         |   |
| 6441   | CA | CA | . ARG ARG ARG B B 421 421 . | 0.3137 | 0.2714 | 0.3295 | -0.0354 | -0.0284 | - |
| 0.0431 | 1  | .  |                             |        |        |        |         |         |   |
| 6442   | CB | CB | . ARG ARG ARG B B 421 421 . | 0.3385 | 0.2635 | 0.3247 | -0.0429 | -0.0538 | - |
| 0.0572 | 1  | .  |                             |        |        |        |         |         |   |
| 6443   | CG | CG | . ARG ARG ARG B B 421 421 . | 0.3518 | 0.2963 | 0.4013 | -0.1003 | -0.0624 | - |
| 0.0377 | 1  | .  |                             |        |        |        |         |         |   |
| 6444   | C  | C  | . ARG ARG ARG B B 421 421 . | 0.2942 | 0.2501 | 0.2990 | -0.0201 | -0.0164 | - |
| 0.0396 | 1  | .  |                             |        |        |        |         |         |   |
| 6445   | O  | O  | . ARG ARG ARG B B 421 421 . | 0.3247 | 0.2974 | 0.3810 | -0.0400 | -0.0289 | - |
| 0.0900 | 1  | .  |                             |        |        |        |         |         |   |
| 6446   | N  | N  | . PHE PHE PHE B B 422 422 . | 0.2699 | 0.1899 | 0.2286 | -0.0040 | -0.0331 | - |
| 0.0045 | 1  | .  |                             |        |        |        |         |         |   |
| 6447   | CA | CA | . PHE PHE PHE B B 422 422 . | 0.2649 | 0.1808 | 0.1996 | 0.0045  | -0.0209 | - |
| 0.0089 | 1  | .  |                             |        |        |        |         |         |   |
| 6448   | CB | CB | . PHE PHE PHE B B 422 422 . | 0.2543 | 0.2002 | 0.2234 | 0.0331  | -0.0251 | - |
| 0.0139 | 1  | .  |                             |        |        |        |         |         |   |







|        |      |      |                             |        |        |        |         |         |   |
|--------|------|------|-----------------------------|--------|--------|--------|---------|---------|---|
| 6539   | CD2  | CD2  | . LEU LEU LEU B B 433 433 . | 0.6699 | 0.6889 | 0.6679 | 0.0288  | -0.0381 | - |
| 0.0091 | 1    | .    |                             |        |        |        |         |         |   |
| 6540   | C    | C    | . LEU LEU LEU B B 433 433 . | 0.6497 | 0.6603 | 0.6339 | -0.0291 | -0.0181 |   |
| 0.0111 | 1    | .    |                             |        |        |        |         |         |   |
| 6541   | O    | O    | . LEU LEU LEU B B 433 433 . | 0.6522 | 0.6645 | 0.6486 | -0.0506 | -0.0313 |   |
| 0.0062 | 1    | .    |                             |        |        |        |         |         |   |
| 6542   | MG+2 | MG+2 | . MG2 MG2 MG2 B . 600 600 . | 0.2120 | 0.1657 | 0.0999 | 0.0179  | 0.0203  |   |
| 0.0004 | 1    | .    |                             |        |        |        |         |         |   |
| 6543   | MG+2 | MG+2 | . MG2 MG2 MG2 B . 601 601 . | 0.2096 | 0.1522 | 0.1306 | 0.0141  | 0.0282  | - |
| 0.0068 | 1    | .    |                             |        |        |        |         |         |   |
| 6544   | O3P  | O3P  | . YAP YAP YAP B . 602 602 . | 0.2693 | 0.1639 | 0.1415 | 0.0101  | -0.0112 |   |
| 0.0076 | 1    | .    |                             |        |        |        |         |         |   |
| 6545   | P    | P    | . YAP YAP YAP B . 602 602 . | 0.1875 | 0.1556 | 0.1550 | 0.0155  | -0.0131 | - |
| 0.0057 | 1    | .    |                             |        |        |        |         |         |   |
| 6546   | O1P  | O1P  | . YAP YAP YAP B . 602 602 . | 0.1888 | 0.1532 | 0.1680 | -0.0062 | -0.0293 |   |
| 0.0225 | 1    | .    |                             |        |        |        |         |         |   |
| 6547   | O2P  | O2P  | . YAP YAP YAP B . 602 602 . | 0.1811 | 0.1499 | 0.1641 | -0.0105 | -0.0059 | - |
| 0.0640 | 1    | .    |                             |        |        |        |         |         |   |
| 6548   | O3   | O3   | . YAP YAP YAP B . 602 602 . | 0.1927 | 0.1783 | 0.1773 | -0.0002 | -0.0193 | - |
| 0.0082 | 1    | .    |                             |        |        |        |         |         |   |
| 6549   | C2   | C2   | . YAP YAP YAP B . 602 602 . | 0.2741 | 0.1801 | 0.1903 | 0.0017  | -0.0025 |   |
| 0.0145 | 1    | .    |                             |        |        |        |         |         |   |
| 6550   | C3   | C3   | . YAP YAP YAP B . 602 602 . | 0.3343 | 0.2283 | 0.2649 | 0.0483  | 0.0014  |   |
| 0.0878 | 1    | .    |                             |        |        |        |         |         |   |
| 6551   | C1   | C1   | . YAP YAP YAP B . 602 602 . | 0.2517 | 0.1943 | 0.2174 | -0.0052 | 0.0090  | - |
| 0.0061 | 1    | .    |                             |        |        |        |         |         |   |
| 6552   | O1   | O1   | . YAP YAP YAP B . 602 602 . | 0.2520 | 0.1563 | 0.1626 | 0.0035  | 0.0180  |   |
| 0.0262 | 1    | .    |                             |        |        |        |         |         |   |
| 6553   | O2   | O2   | . YAP YAP YAP B . 602 602 . | 0.2323 | 0.1419 | 0.1736 | 0.0382  | 0.0067  |   |
| 0.0074 | 1    | .    |                             |        |        |        |         |         |   |
| 6554   | O    | O    | . HOH HOH HOH S . 1 1 .     | 0.2315 | 0.0993 | 0.1539 | 0.0409  | 0.0161  | - |
| 0.0204 | 1    | .    |                             |        |        |        |         |         |   |
| 6555   | O    | O    | . HOH HOH HOH S . 2 2 .     | 0.1761 | 0.1054 | 0.1059 | -0.0088 | -0.0064 | - |
| 0.0136 | 1    | .    |                             |        |        |        |         |         |   |
| 6556   | O    | O    | . HOH HOH HOH S . 3 3 .     | 0.1604 | 0.1572 | 0.0958 | 0.0059  | 0.0240  | - |
| 0.0044 | 1    | .    |                             |        |        |        |         |         |   |
| 6557   | O    | O    | . HOH HOH HOH S . 4 4 .     | 0.2010 | 0.1050 | 0.1110 | 0.0042  | -0.0080 |   |
| 0.0017 | 1    | .    |                             |        |        |        |         |         |   |
| 6558   | O    | O    | . HOH HOH HOH S . 5 5 .     | 0.1582 | 0.1560 | 0.1556 | 0.0098  | -0.0010 | - |
| 0.0056 | 1    | .    |                             |        |        |        |         |         |   |
| 6559   | O    | O    | . HOH HOH HOH S . 6 6 .     | 0.1657 | 0.1164 | 0.1313 | -0.0311 | 0.0221  | - |
| 0.0240 | 1    | .    |                             |        |        |        |         |         |   |
| 6560   | O    | O    | . HOH HOH HOH S . 7 7 .     | 0.1635 | 0.1810 | 0.1580 | -0.0143 | 0.0267  | - |
| 0.0102 | 1    | .    |                             |        |        |        |         |         |   |
| 6561   | O    | O    | . HOH HOH HOH S . 8 8 .     | 0.2531 | 0.1826 | 0.1092 | -0.0046 | -0.0096 | - |
| 0.0112 | 1    | .    |                             |        |        |        |         |         |   |
| 6562   | O    | O    | . HOH HOH HOH S . 9 9 .     | 0.1975 | 0.1977 | 0.1431 | 0.0181  | 0.0031  | - |
| 0.0218 | 1    | .    |                             |        |        |        |         |         |   |
| 6563   | O    | O    | . HOH HOH HOH S . 10 10 .   | 0.2310 | 0.1020 | 0.1569 | 0.0147  | 0.0082  | - |
| 0.0001 | 1    | .    |                             |        |        |        |         |         |   |
| 6564   | O    | O    | . HOH HOH HOH S . 11 11 .   | 0.2479 | 0.1336 | 0.2131 | 0.0221  | 0.0042  | - |
| 0.0007 | 1    | .    |                             |        |        |        |         |         |   |
| 6565   | O    | O    | . HOH HOH HOH S . 12 12 .   | 0.1186 | 0.1963 | 0.1516 | 0.0012  | -0.0069 | - |
| 0.0049 | 1    | .    |                             |        |        |        |         |         |   |
| 6566   | O    | O    | . HOH HOH HOH S . 13 13 .   | 0.1913 | 0.1308 | 0.1650 | 0.0356  | -0.0181 |   |
| 0.0010 | 1    | .    |                             |        |        |        |         |         |   |
| 6567   | O    | O    | . HOH HOH HOH S . 14 14 .   | 0.1631 | 0.1799 | 0.1229 | 0.0497  | 0.0326  |   |
| 0.0233 | 1    | .    |                             |        |        |        |         |         |   |
| 6568   | O    | O    | . HOH HOH HOH S . 15 15 .   | 0.2007 | 0.2122 | 0.1978 | 0.0042  | -0.0173 | - |
| 0.0217 | 1    | .    |                             |        |        |        |         |         |   |





























































7349 O O . HOH HOH HOH S . 796 796 . 0.9482 0.8772 1.6048 -0.1040 0.1139 -  
0.0433 1 .  
7350 O O . HOH HOH HOH S . 797 797 . 0.6661 0.3781 0.5398 0.0285 -0.1006 -  
0.0611 1 .  
7351 O O . HOH HOH HOH S . 798 798 . 0.6243 0.8642 0.7174 0.1269 -0.0660  
0.1751 1 .  
7352 O O . HOH HOH HOH S . 799 799 . 0.7762 0.8581 0.3888 0.0309 0.1368  
0.0657 1 .  
7353 O O . HOH HOH HOH S . 800 800 . 0.8879 0.4076 1.0426 0.1515 0.1981 -  
0.0588 1 .  
7354 O O . HOH HOH HOH S . 801 801 . 0.5966 0.8634 1.3101 -0.4847 0.1384 -  
0.6786 1 .  
7355 O O . HOH HOH HOH S . 802 802 . 0.7982 0.6897 0.8487 0.3093 0.2999  
0.2405 1 .  
7356 O O . HOH HOH HOH S . 803 803 . 0.5225 1.3266 1.0551 -0.1005 0.2225 -  
0.1122 1 .  
7357 O O . HOH HOH HOH S . 804 804 . 0.6573 0.6009 0.6733 -0.2230 0.1168  
0.0617 1 .  
7358 O O . HOH HOH HOH S . 805 805 . 0.3535 0.8771 0.6731 -0.3144 -0.0323  
0.0482 1 .  
7359 O O . HOH HOH HOH S . 806 806 . 0.4537 0.7439 0.6774 -0.0866 0.1261  
0.1943 1 .

```

#
_atom_sites.entry_id          UNNAMED
_atom_sites.fract_transf_matrix[1][1]  0.008737
_atom_sites.fract_transf_matrix[1][2]  0.000000
_atom_sites.fract_transf_matrix[1][3]  0.000000
_atom_sites.fract_transf_matrix[2][1]  0.000000
_atom_sites.fract_transf_matrix[2][2]  0.008346
_atom_sites.fract_transf_matrix[2][3]  0.000000
_atom_sites.fract_transf_matrix[3][1]  0.000000
_atom_sites.fract_transf_matrix[3][2]  0.000000
_atom_sites.fract_transf_matrix[3][3]  0.014660
_atom_sites.fract_transf_vector[1]    0.000000
_atom_sites.fract_transf_vector[2]    0.000000
_atom_sites.fract_transf_vector[3]    0.000000

```

```

#
_cell.length_a      114.453
_cell.length_b      119.816
_cell.length_c       68.213
_cell.angle_alpha   90.000
_cell.angle_beta    90.000
_cell.angle_gamma   90.000
_cell.entry_id      UNNAMED

```

```

#
_computing.entry_id          UNNAMED
_computing.structure_refinement  'REFMAC 5.5.0109'
_computing.structure_solution  ?
_computing.pdbx_data_reduction_ds  HKL
_computing.pdbx_data_reduction_ii  HKL
_computing.cell_refinement      HKL

```

```

#
_data_extraction.software      pdb_extract
_data_extraction.extraction_date  'Fri Oct 21 14:37:30 2011'
_data_extraction.version        3.10
_data_extraction.release_date    'June 10, 2010'
_data_extraction.location        http://sw-tools.rcsb.org/apps/PDB\_EXTRACT/

```

```

#
loop_
_database_2.database_id

```

\_database\_2.database\_code

PDB UNNAMED

RCSB UNNAMED

#

\_database\_PDB\_remark.id 3

\_database\_PDB\_remark.text

;

REMARK 3

REMARK 3 REFINEMENT.

REMARK 3 PROGRAM : REFMAC 5.5.0109

REMARK 3 AUTHORS : MURSHUDOV,VAGIN,DODSON

REMARK 3

REMARK 3 REFINEMENT TARGET : MAXIMUM LIKELIHOOD

REMARK 3

REMARK 3 DATA USED IN REFINEMENT.

REMARK 3 RESOLUTION RANGE HIGH (ANGSTROMS) : 1.65

REMARK 3 RESOLUTION RANGE LOW (ANGSTROMS) : 82.76

REMARK 3 DATA CUTOFF (SIGMA(F)) : NONE

REMARK 3 COMPLETENESS FOR RANGE (%) : 99.33

REMARK 3 NUMBER OF REFLECTIONS : 106788

REMARK 3

REMARK 3 FIT TO DATA USED IN REFINEMENT.

REMARK 3 CROSS-VALIDATION METHOD : THROUGHOUT

REMARK 3 FREE R VALUE TEST SET SELECTION : RANDOM

REMARK 3 R VALUE (WORKING + TEST SET) : 0.13662

REMARK 3 R VALUE (WORKING SET) : 0.13410

REMARK 3 FREE R VALUE : 0.18280

REMARK 3 FREE R VALUE TEST SET SIZE (%) : 5.1

REMARK 3 FREE R VALUE TEST SET COUNT : 5744

REMARK 3

REMARK 3 FIT IN THE HIGHEST RESOLUTION BIN.

REMARK 3 TOTAL NUMBER OF BINS USED : 20

REMARK 3 BIN RESOLUTION RANGE HIGH : 1.650

REMARK 3 BIN RESOLUTION RANGE LOW : 1.693

REMARK 3 REFLECTION IN BIN (WORKING SET) : 7625

REMARK 3 BIN COMPLETENESS (WORKING+TEST) (%) : 97.53

REMARK 3 BIN R VALUE (WORKING SET) : 0.197

REMARK 3 BIN FREE R VALUE SET COUNT : 445

REMARK 3 BIN FREE R VALUE : 0.260

REMARK 3

REMARK 3 NUMBER OF NON-HYDROGEN ATOMS USED IN REFINEMENT.

REMARK 3 ALL ATOMS : 7359

REMARK 3

REMARK 3 B VALUES.

REMARK 3 FROM WILSON PLOT (A\*\*2) : NULL

REMARK 3 MEAN B VALUE (OVERALL, A\*\*2) : 20.908

REMARK 3 OVERALL ANISOTROPIC B VALUE.

REMARK 3 B11 (A\*\*2) : 1.48

REMARK 3 B22 (A\*\*2) : -0.53

REMARK 3 B33 (A\*\*2) : -0.95

REMARK 3 B12 (A\*\*2) : 0.00

REMARK 3 B13 (A\*\*2) : 0.00

REMARK 3 B23 (A\*\*2) : 0.00

REMARK 3

REMARK 3 ESTIMATED OVERALL COORDINATE ERROR.

REMARK 3 ESU BASED ON R VALUE (A) : 0.096

REMARK 3 ESU BASED ON FREE R VALUE (A) : 0.081

REMARK 3 ESU BASED ON MAXIMUM LIKELIHOOD (A) : 0.050

REMARK 3 ESU FOR B VALUES BASED ON MAXIMUM LIKELIHOOD (A\*\*2) : 3.244

REMARK 3

REMARK 3 CORRELATION COEFFICIENTS.  
REMARK 3 CORRELATION COEFFICIENT FO-FC : 0.974  
REMARK 3 CORRELATION COEFFICIENT FO-FC FREE : 0.959  
REMARK 3  
REMARK 3 RMS DEVIATIONS FROM IDEAL VALUES COUNT RMS WEIGHT  
REMARK 3 BOND LENGTHS REFINED ATOMS (A) : 6656 ; 0.028 ; 0.022  
REMARK 3 BOND ANGLES REFINED ATOMS (DEGREES) : 9016 ; 2.077 ; 1.969  
REMARK 3 TORSION ANGLES, PERIOD 1 (DEGREES) : 864 ; 6.216 ; 5.000  
REMARK 3 TORSION ANGLES, PERIOD 2 (DEGREES) : 282 ; 37.381 ; 24.752  
REMARK 3 TORSION ANGLES, PERIOD 3 (DEGREES) : 1112 ; 12.816 ; 15.000  
REMARK 3 TORSION ANGLES, PERIOD 4 (DEGREES) : 37 ; 21.210 ; 15.000  
REMARK 3 CHIRAL-CENTER RESTRAINTS (A\*\*3) : 1025 ; 0.165 ; 0.200  
REMARK 3 GENERAL PLANES REFINED ATOMS (A) : 5005 ; 0.013 ; 0.021  
REMARK 3  
REMARK 3 ISOTROPIC THERMAL FACTOR RESTRAINTS. COUNT RMS WEIGHT  
REMARK 3 MAIN-CHAIN BOND REFINED ATOMS (A\*\*2) : 4284 ; 2.410 ; 1.500  
REMARK 3 MAIN-CHAIN ANGLE REFINED ATOMS (A\*\*2) : 6838 ; 3.388 ; 2.000  
REMARK 3 SIDE-CHAIN BOND REFINED ATOMS (A\*\*2) : 2372 ; 5.297 ; 3.000  
REMARK 3 SIDE-CHAIN ANGLE REFINED ATOMS (A\*\*2) : 2178 ; 7.516 ; 4.500  
REMARK 3  
REMARK 3 ANISOTROPIC THERMAL FACTOR RESTRAINTS. COUNT RMS WEIGHT  
REMARK 3 RIGID-BOND RESTRAINTS (A\*\*2) : 6656 ; 2.875 ; 3.000  
REMARK 3  
REMARK 3 NCS RESTRAINTS STATISTICS  
REMARK 3 NUMBER OF NCS GROUPS : NULL  
REMARK 3  
REMARK 3 TWIN DETAILS  
REMARK 3 NUMBER OF TWIN DOMAINS : NULL  
REMARK 3  
REMARK 3  
REMARK 3 TLS DETAILS  
REMARK 3 NUMBER OF TLS GROUPS : NULL  
REMARK 3  
REMARK 3  
REMARK 3 BULK SOLVENT MODELLING.  
REMARK 3 METHOD USED : MASK  
REMARK 3 PARAMETERS FOR MASK CALCULATION  
REMARK 3 VDW PROBE RADIUS : 1.40  
REMARK 3 ION PROBE RADIUS : 0.80  
REMARK 3 SHRINKAGE RADIUS : 0.80  
REMARK 3  
REMARK 3 OTHER REFINEMENT REMARKS:  
REMARK 3 HYDROGENS HAVE BEEN ADDED IN THE RIDING POSITIONS  
REMARK 3 U VALUES : REFINED INDIVIDUALLY  
REMARK 3

```

;
#
_entity_poly.entity_id 1
_entity_poly.pdbx_seq_one_letter_code
;SIEKIWAREILDSRGNPTVEVDLYTAKGLFRAAVPSGASTGIYEALRLDGDQRYLGKG
VLKAVDHNSTIAPALISSGLSVVEQEKLDNLMLELDGTENKSKFGANAILGVSLAVCKA
GAAERELPLYRHIAQLAGNSDLILPVPFVINGGSHAGNKLAMQEFMILPVGAESFRDA
MRLGAEVYHTLKGVIKDKYGKDATNVGDEGGFAPNILENSEALELVKEAIDKAGYTEKIV
IGMDVAASEFYRDGKYDLDFKSPTDPSRYITGDQLGALYQDFVRDYPVVSIEDPFDQDDW
AAWSKFTANVGIQIVGDDLTVTNPKRIERAVEEKACNCLLLKVNQIGSVTEAIQACKLAQ
ENGWGVMSHRSGETEDTFIADLVVGLCTGQIKTGAPCRSERLAKYNQLMRIEELGDEA
RFAGHNFRNPSVL
;
_entity_poly.pdbx_strand_id A,B
_entity_poly.type 'polypeptide(L)'

```

```

_entity_poly.pdbx_target_identifier      ?
#
_entry.id      UNNAMED
#
_exptl.crystals_number      1
_exptl.entry_id      UNNAMED
_exptl.method      'X-RAY DIFFRACTION'
#
_exptl_crystal.id      1
_exptl_crystal.pdbx_mosaicity      0.614
_exptl_crystal.pdbx_mosaicity_esd      ?
_exptl_crystal.density_Matthews      ?
_exptl_crystal.density_diffn      ?
_exptl_crystal.density_meas      ?
_exptl_crystal.density_meas_temp      ?
_exptl_crystal.density_percent_sol      ?
_exptl_crystal.size_max      ?
_exptl_crystal.size_mid      ?
_exptl_crystal.size_min      ?
_exptl_crystal.size_rad      ?
#
_refine.entry_id      UNNAMED
_refine.pdbx_refine_id      'X-RAY DIFFRACTION'
_refine.ls_d_res_high      1.6500
_refine.ls_d_res_low      82.7600
_refine.pdbx_ls_sigma_F      0.000
_refine.pdbx_data_cutoff_high_absF      ?
_refine.pdbx_data_cutoff_low_absF      ?
_refine.ls_percent_reflns_obs      99.3300
_refine.ls_number_reflns_obs      112532
_refine.ls_number_reflns_all      ?
_refine.pdbx_ls_cross_valid_method      THROUGHOUT
_refine.ls_matrix_type      ?
_refine.pdbx_R_Free_selection_details      RANDOM
_refine.details
' HYDROGENS HAVE BEEN ADDED IN THE RIDING POSITIONS U VALUES      : REFINED
INDIVIDUALLY '
_refine.ls_R_factor_all      ?
_refine.ls_R_factor_obs      0.1366
_refine.ls_R_factor_R_work      0.1341
_refine.ls_wR_factor_R_work      0.1365
_refine.ls_R_factor_R_free      0.1828
_refine.ls_wR_factor_R_free      0.1845
_refine.ls_percent_reflns_R_free      5.1000
_refine.ls_number_reflns_R_free      5744
_refine.ls_number_reflns_R_work      106788
_refine.ls_R_factor_R_free_error      ?
_refine.B_iso_mean      21.2151
_refine.solvent_model_param_bsol      ?
_refine.solvent_model_param_ksol      ?
_refine.pdbx_isotropic_thermal_model      ?
_refine.aniso_B[1][1]      1.4800
_refine.aniso_B[2][2]      -0.5300
_refine.aniso_B[3][3]      -0.9500
_refine.aniso_B[1][2]      0.0000
_refine.aniso_B[1][3]      0.0000
_refine.aniso_B[2][3]      0.0000
_refine.correlation_coeff_Fo_to_Fc      0.9740
_refine.correlation_coeff_Fo_to_Fc_free      0.9590
_refine.overall_SU_R_Cruickshank_DPI      0.0961

```

|                                                 |                        |
|-------------------------------------------------|------------------------|
| _refine.pdbx_overall_SU_R_free_Cruickshank_DPI  | ?                      |
| _refine.pdbx_overall_SU_R_Blow_DPI              | ?                      |
| _refine.pdbx_overall_SU_R_free_Blow_DPI         | ?                      |
| _refine.overall_SU_R_free                       | 0.0808                 |
| _refine.pdbx_overall_ESU_R                      | 0.0960                 |
| _refine.pdbx_overall_ESU_R_Free                 | 0.0810                 |
| _refine.overall_SU_ML                           | 0.0500                 |
| _refine.overall_SU_B                            | 3.2440                 |
| _refine.solvent_model_details                   | MASK                   |
| _refine.pdbx_solvent_vdw_probe_radii            | 1.4000                 |
| _refine.pdbx_solvent_ion_probe_radii            | 0.8000                 |
| _refine.pdbx_solvent_shrinkage_radii            | 0.8000                 |
| _refine.ls_number_parameters                    | ?                      |
| _refine.ls_number_restraints                    | ?                      |
| _refine.pdbx_starting_model                     | ?                      |
| _refine.pdbx_method_to_determine_struct         | ?                      |
| _refine.pdbx_stereochemistry_target_values      | 'MAXIMUM LIKELIHOOD'   |
| _refine.pdbx_stereochem_target_val_spec_case    | ?                      |
| _refine.overall_FOM_work_R_set                  | 0.9082                 |
| _refine.B_iso_max                               | 101.080                |
| _refine.B_iso_min                               | 6.470                  |
| _refine.pdbx_overall_phase_error                | ?                      |
| _refine.occupancy_max                           | 1.000                  |
| _refine.occupancy_min                           | 0.500                  |
| #                                               |                        |
| loop_                                           |                        |
| _refine_ls_restr.pdbx_refine_id                 |                        |
| _refine_ls_restr.type                           |                        |
| _refine_ls_restr.number                         |                        |
| _refine_ls_restr.dev_ideal                      |                        |
| _refine_ls_restr.dev_ideal_target               |                        |
| _refine_ls_restr.weight                         |                        |
| _refine_ls_restr.pdbx_restraint_function        |                        |
| 'X-RAY DIFFRACTION' r_bond_refined_d            | 6656 0.028 0.022 ? ?   |
| 'X-RAY DIFFRACTION' r_angle_refined_deg         | 9016 2.077 1.969 ? ?   |
| 'X-RAY DIFFRACTION' r_dihedral_angle_1_deg      | 864 6.216 5.000 ? ?    |
| 'X-RAY DIFFRACTION' r_dihedral_angle_2_deg      | 282 37.381 24.752 ? ?  |
| 'X-RAY DIFFRACTION' r_dihedral_angle_3_deg      | 1112 12.816 15.000 ? ? |
| 'X-RAY DIFFRACTION' r_dihedral_angle_4_deg      | 37 21.210 15.000 ? ?   |
| 'X-RAY DIFFRACTION' r_chiral_restr              | 1025 0.165 0.200 ? ?   |
| 'X-RAY DIFFRACTION' r_gen_planes_refined        | 5005 0.013 0.021 ? ?   |
| 'X-RAY DIFFRACTION' r_mcbond_it                 | 4284 2.410 1.500 ? ?   |
| 'X-RAY DIFFRACTION' r_mcbond_angle_it           | 6838 3.388 2.000 ? ?   |
| 'X-RAY DIFFRACTION' r_scbond_it                 | 2372 5.297 3.000 ? ?   |
| 'X-RAY DIFFRACTION' r_scbond_angle_it           | 2178 7.516 4.500 ? ?   |
| 'X-RAY DIFFRACTION' r_rigid_bond_restr          | 6656 2.875 3.000 ? ?   |
| #                                               |                        |
| _refine_ls_shell.d_res_high                     | 1.6500                 |
| _refine_ls_shell.d_res_low                      | 1.6930                 |
| _refine_ls_shell.pdbx_total_number_of_bins_used | 20                     |
| _refine_ls_shell.percent_reflns_obs             | 97.5300                |
| _refine_ls_shell.number_reflns_R_work           | 7625                   |
| _refine_ls_shell.R_factor_all                   | ?                      |
| _refine_ls_shell.R_factor_R_work                | 0.1970                 |
| _refine_ls_shell.R_factor_R_free                | 0.2600                 |
| _refine_ls_shell.percent_reflns_R_free          | ?                      |
| _refine_ls_shell.number_reflns_R_free           | 445                    |
| _refine_ls_shell.R_factor_R_free_error          | ?                      |
| _refine_ls_shell.number_reflns_all              | 8070                   |
| _refine_ls_shell.number_reflns_obs              | ?                      |





```

2.120 2.430  ? ? ? ? 0.073 ? ? 1.632 6.100 ? ? ? ? ? ? ? ? ? ? 17802 ? ? ? ? 100.000 ?
?
2.430 3.060  ? ? ? ? 0.053 ? ? 2.090 6.100 ? ? ? ? ? ? ? ? ? ? 17892 ? ? ? ? 100.000 ?
?
3.060 50.000 ? ? ? ? 0.034 ? ? 2.125 5.900 ? ? ? ? ? ? ? ? ? ? 18407 ? ? ? ? 99.600 ?
?
#
loop_
_software.pdbx_ordinal
_software.name
_software.version
_software.date
_software.type
_software.contact_author
_software.contact_author_email
_software.classification
_software.location
_software.language
1 HKL      ?      ?      package 'Zbyszek Otwinowski' hkl@hkl-xray.com
'data reduction' http://www.hkl-xray.com/      ?
2 REFMAC5  ?      ?      program 'Garib N. Murshudov' garib@ysbl.york.ac.uk
refinement      http://www.ccp4.ac.uk/dist/html/refmac5.html Fortran_77
3 pdb_extract 3.10 'June 10, 2010' package PDB
deposit@deposit.rcsb.org
'data extraction' http://sw-tools.pdb.org/apps/PDB_EXTRACT/      C++
#
_struct_biol.id      1
_struct_biol.details ?
#
_symmetry.space_group_name_H-M 'P 21 21 2'
_symmetry.entry_id    UNNAMED
_symmetry.Int_Tables_number 18
#

```

## CIF File(s) (REQUIRED if paper describes X-ray crystal structures)

data\_UNNAMED

#

loop\_

\_atom\_site.group\_PDB

\_atom\_site.id

\_atom\_site.auth\_atom\_id

\_atom\_site.label\_atom\_id

\_atom\_site.label\_alt\_id

\_atom\_site.auth\_comp\_id

\_atom\_site.label\_comp\_id

\_atom\_site.pdbx\_auth\_comp\_id

\_atom\_site.auth\_asym\_id

\_atom\_site.label\_asym\_id

\_atom\_site.auth\_seq\_id

\_atom\_site.label\_seq\_id

\_atom\_site.pdbx\_PDB\_ins\_code

\_atom\_site.Cartn\_x

\_atom\_site.Cartn\_y

\_atom\_site.Cartn\_z

\_atom\_site.occupancy

\_atom\_site.B\_iso\_or\_equiv

\_atom\_site.pdbx\_PDB\_model\_num

\_atom\_site.label\_entity\_id

\_atom\_site.type\_symbol

|        |   |   |   |     |     |     |   |   |   |   |   |        |        |        |      |       |
|--------|---|---|---|-----|-----|-----|---|---|---|---|---|--------|--------|--------|------|-------|
| ATOM 1 | N | N | . | SER | SER | SER | A | A | 1 | 1 | . | 65.976 | 77.019 | 22.059 | 1.00 | 44.42 |
|--------|---|---|---|-----|-----|-----|---|---|---|---|---|--------|--------|--------|------|-------|

1 . .

|        |    |    |   |     |     |     |   |   |   |   |   |        |        |        |      |       |
|--------|----|----|---|-----|-----|-----|---|---|---|---|---|--------|--------|--------|------|-------|
| ATOM 2 | CA | CA | . | SER | SER | SER | A | A | 1 | 1 | . | 67.187 | 76.340 | 21.492 | 1.00 | 44.16 |
|--------|----|----|---|-----|-----|-----|---|---|---|---|---|--------|--------|--------|------|-------|

1 . .

|        |    |    |   |     |     |     |   |   |   |   |   |        |        |        |      |       |
|--------|----|----|---|-----|-----|-----|---|---|---|---|---|--------|--------|--------|------|-------|
| ATOM 3 | CB | CB | . | SER | SER | SER | A | A | 1 | 1 | . | 66.962 | 74.824 | 21.282 | 1.00 | 44.78 |
|--------|----|----|---|-----|-----|-----|---|---|---|---|---|--------|--------|--------|------|-------|

1 . .

|        |    |    |   |     |     |     |   |   |   |   |   |        |        |        |      |       |
|--------|----|----|---|-----|-----|-----|---|---|---|---|---|--------|--------|--------|------|-------|
| ATOM 4 | OG | OG | . | SER | SER | SER | A | A | 1 | 1 | . | 66.114 | 74.534 | 20.151 | 1.00 | 47.88 |
|--------|----|----|---|-----|-----|-----|---|---|---|---|---|--------|--------|--------|------|-------|

1 . .

|        |   |   |   |     |     |     |   |   |   |   |   |        |        |        |      |       |
|--------|---|---|---|-----|-----|-----|---|---|---|---|---|--------|--------|--------|------|-------|
| ATOM 5 | C | C | . | SER | SER | SER | A | A | 1 | 1 | . | 67.653 | 77.039 | 20.205 | 1.00 | 42.89 |
|--------|---|---|---|-----|-----|-----|---|---|---|---|---|--------|--------|--------|------|-------|

1 . .

|        |   |   |   |     |     |     |   |   |   |   |   |        |        |        |      |       |
|--------|---|---|---|-----|-----|-----|---|---|---|---|---|--------|--------|--------|------|-------|
| ATOM 6 | O | O | . | SER | SER | SER | A | A | 1 | 1 | . | 66.900 | 77.817 | 19.583 | 1.00 | 43.05 |
|--------|---|---|---|-----|-----|-----|---|---|---|---|---|--------|--------|--------|------|-------|

1 . .

|        |   |   |   |     |     |     |   |   |   |   |   |        |        |        |      |       |
|--------|---|---|---|-----|-----|-----|---|---|---|---|---|--------|--------|--------|------|-------|
| ATOM 7 | N | N | . | ILE | ILE | ILE | A | A | 2 | 2 | . | 68.906 | 76.751 | 19.846 | 1.00 | 40.87 |
|--------|---|---|---|-----|-----|-----|---|---|---|---|---|--------|--------|--------|------|-------|

1 . .

|        |    |    |   |     |     |     |   |   |   |   |   |        |        |        |      |       |
|--------|----|----|---|-----|-----|-----|---|---|---|---|---|--------|--------|--------|------|-------|
| ATOM 8 | CA | CA | . | ILE | ILE | ILE | A | A | 2 | 2 | . | 69.595 | 77.336 | 18.722 | 1.00 | 38.87 |
|--------|----|----|---|-----|-----|-----|---|---|---|---|---|--------|--------|--------|------|-------|

1 . .

|        |    |    |   |     |     |     |   |   |   |   |   |        |        |        |      |       |
|--------|----|----|---|-----|-----|-----|---|---|---|---|---|--------|--------|--------|------|-------|
| ATOM 9 | CB | CB | . | ILE | ILE | ILE | A | A | 2 | 2 | . | 71.099 | 77.023 | 18.869 | 1.00 | 37.82 |
|--------|----|----|---|-----|-----|-----|---|---|---|---|---|--------|--------|--------|------|-------|

1 . .

|         |     |     |   |     |     |     |   |   |   |   |   |        |        |        |      |       |
|---------|-----|-----|---|-----|-----|-----|---|---|---|---|---|--------|--------|--------|------|-------|
| ATOM 10 | CG1 | CG1 | . | ILE | ILE | ILE | A | A | 2 | 2 | . | 71.623 | 77.778 | 20.047 | 1.00 | 35.48 |
|---------|-----|-----|---|-----|-----|-----|---|---|---|---|---|--------|--------|--------|------|-------|

1 . .

|         |     |     |   |     |     |     |   |   |   |   |   |        |        |        |      |       |
|---------|-----|-----|---|-----|-----|-----|---|---|---|---|---|--------|--------|--------|------|-------|
| ATOM 11 | CD1 | CD1 | . | ILE | ILE | ILE | A | A | 2 | 2 | . | 72.956 | 77.307 | 20.551 | 1.00 | 34.77 |
|---------|-----|-----|---|-----|-----|-----|---|---|---|---|---|--------|--------|--------|------|-------|

1 . .

|         |     |     |   |     |     |     |   |   |   |   |   |        |        |        |      |       |
|---------|-----|-----|---|-----|-----|-----|---|---|---|---|---|--------|--------|--------|------|-------|
| ATOM 12 | CG2 | CG2 | . | ILE | ILE | ILE | A | A | 2 | 2 | . | 71.875 | 77.369 | 17.602 | 1.00 | 36.33 |
|---------|-----|-----|---|-----|-----|-----|---|---|---|---|---|--------|--------|--------|------|-------|

1 . .

|         |   |   |   |     |     |     |   |   |   |   |   |        |        |        |      |       |
|---------|---|---|---|-----|-----|-----|---|---|---|---|---|--------|--------|--------|------|-------|
| ATOM 13 | C | C | . | ILE | ILE | ILE | A | A | 2 | 2 | . | 69.065 | 76.708 | 17.459 | 1.00 | 38.82 |
|---------|---|---|---|-----|-----|-----|---|---|---|---|---|--------|--------|--------|------|-------|

1 . .

|         |   |   |   |     |     |     |   |   |   |   |   |        |        |        |      |       |
|---------|---|---|---|-----|-----|-----|---|---|---|---|---|--------|--------|--------|------|-------|
| ATOM 14 | O | O | . | ILE | ILE | ILE | A | A | 2 | 2 | . | 69.031 | 75.493 | 17.373 | 1.00 | 38.91 |
|---------|---|---|---|-----|-----|-----|---|---|---|---|---|--------|--------|--------|------|-------|

1 . .

|         |   |   |   |     |     |     |   |   |   |   |   |        |        |        |      |       |
|---------|---|---|---|-----|-----|-----|---|---|---|---|---|--------|--------|--------|------|-------|
| ATOM 15 | N | N | . | GLN | GLN | GLN | A | A | 3 | 3 | . | 68.676 | 77.507 | 16.466 | 1.00 | 39.22 |
|---------|---|---|---|-----|-----|-----|---|---|---|---|---|--------|--------|--------|------|-------|

1 . .

|         |    |    |   |     |     |     |   |   |   |   |   |        |        |        |      |       |
|---------|----|----|---|-----|-----|-----|---|---|---|---|---|--------|--------|--------|------|-------|
| ATOM 16 | CA | CA | . | GLN | GLN | GLN | A | A | 3 | 3 | . | 68.149 | 76.913 | 15.209 | 1.00 | 40.06 |
|---------|----|----|---|-----|-----|-----|---|---|---|---|---|--------|--------|--------|------|-------|

1 . .

|         |    |    |   |     |     |     |   |   |   |   |   |        |        |        |      |       |
|---------|----|----|---|-----|-----|-----|---|---|---|---|---|--------|--------|--------|------|-------|
| ATOM 17 | CB | CB | . | GLN | GLN | GLN | A | A | 3 | 3 | . | 66.936 | 77.670 | 14.615 | 1.00 | 39.86 |
|---------|----|----|---|-----|-----|-----|---|---|---|---|---|--------|--------|--------|------|-------|

1 . .

|         |    |    |   |     |     |     |   |   |   |   |   |        |        |        |      |       |
|---------|----|----|---|-----|-----|-----|---|---|---|---|---|--------|--------|--------|------|-------|
| ATOM 18 | CG | CG | . | GLN | GLN | GLN | A | A | 3 | 3 | . | 65.789 | 77.963 | 15.582 | 1.00 | 42.25 |
|---------|----|----|---|-----|-----|-----|---|---|---|---|---|--------|--------|--------|------|-------|

1 . .



























|          |     |     |                                                           |
|----------|-----|-----|-----------------------------------------------------------|
| ATOM 379 | N   | N   | . ASP ASP ASP A A 50 50 . 94.809 80.481 8.985 1.00 34.48  |
| 1 . .    |     |     |                                                           |
| ATOM 380 | CA  | CA  | . ASP ASP ASP A A 50 50 . 95.002 79.519 7.883 1.00 34.20  |
| 1 . .    |     |     |                                                           |
| ATOM 381 | CB  | CB  | . ASP ASP ASP A A 50 50 . 94.198 79.933 6.684 1.00 31.98  |
| 1 . .    |     |     |                                                           |
| ATOM 382 | CG  | CG  | . ASP ASP ASP A A 50 50 . 92.683 79.929 6.970 1.00 31.30  |
| 1 . .    |     |     |                                                           |
| ATOM 383 | OD1 | OD1 | . ASP ASP ASP A A 50 50 . 92.234 79.396 8.006 1.00 25.39  |
| 1 . .    |     |     |                                                           |
| ATOM 384 | OD2 | OD2 | . ASP ASP ASP A A 50 50 . 91.927 80.454 6.137 1.00 28.57  |
| 1 . .    |     |     |                                                           |
| ATOM 385 | C   | C   | . ASP ASP ASP A A 50 50 . 96.453 79.231 7.493 1.00 35.74  |
| 1 . .    |     |     |                                                           |
| ATOM 386 | O   | O   | . ASP ASP ASP A A 50 50 . 96.785 78.062 7.242 1.00 36.36  |
| 1 . .    |     |     |                                                           |
| ATOM 387 | N   | N   | . GLY GLY GLY A A 51 51 . 97.312 80.253 7.438 1.00 36.77  |
| 1 . .    |     |     |                                                           |
| ATOM 388 | CA  | CA  | . GLY GLY GLY A A 51 51 . 98.748 80.044 7.038 1.00 39.10  |
| 1 . .    |     |     |                                                           |
| ATOM 389 | C   | C   | . GLY GLY GLY A A 51 51 . 98.955 79.798 5.534 1.00 40.45  |
| 1 . .    |     |     |                                                           |
| ATOM 390 | O   | O   | . GLY GLY GLY A A 51 51 . 100.025 79.337 5.111 1.00 41.92 |
| 1 . .    |     |     |                                                           |
| ATOM 391 | N   | N   | . ASP ASP ASP A A 52 52 . 97.934 80.102 4.736 1.00 40.57  |
| 1 . .    |     |     |                                                           |
| ATOM 392 | CA  | CA  | . ASP ASP ASP A A 52 52 . 97.954 80.033 3.265 1.00 41.99  |
| 1 . .    |     |     |                                                           |
| ATOM 393 | CB  | CB  | . ASP ASP ASP A A 52 52 . 96.509 79.810 2.715 1.00 41.59  |
| 1 . .    |     |     |                                                           |
| ATOM 394 | CG  | CG  | . ASP ASP ASP A A 52 52 . 96.443 79.831 1.154 1.00 43.74  |
| 1 . .    |     |     |                                                           |
| ATOM 395 | OD1 | OD1 | . ASP ASP ASP A A 52 52 . 95.306 79.708 0.571 1.00 42.86  |
| 1 . .    |     |     |                                                           |
| ATOM 396 | OD2 | OD2 | . ASP ASP ASP A A 52 52 . 97.536 79.968 0.519 1.00 44.60  |
| 1 . .    |     |     |                                                           |
| ATOM 397 | C   | C   | . ASP ASP ASP A A 52 52 . 98.527 81.333 2.680 1.00 43.19  |
| 1 . .    |     |     |                                                           |
| ATOM 398 | O   | O   | . ASP ASP ASP A A 52 52 . 97.791 82.311 2.467 1.00 43.21  |
| 1 . .    |     |     |                                                           |
| ATOM 399 | N   | N   | . LYS LYS LYS A A 53 53 . 99.836 81.343 2.433 1.00 44.59  |
| 1 . .    |     |     |                                                           |
| ATOM 400 | CA  | CA  | . LYS LYS LYS A A 53 53 . 100.527 82.477 1.817 1.00 45.85 |
| 1 . .    |     |     |                                                           |
| ATOM 401 | CB  | CB  | . LYS LYS LYS A A 53 53 . 102.005 82.132 1.569 1.00 46.37 |
| 1 . .    |     |     |                                                           |
| ATOM 402 | CG  | CG  | . LYS LYS LYS A A 53 53 . 102.720 81.393 2.728 1.00 49.11 |
| 1 . .    |     |     |                                                           |
| ATOM 403 | CD  | CD  | . LYS LYS LYS A A 53 53 . 103.332 82.318 3.805 1.00 53.40 |
| 1 . .    |     |     |                                                           |
| ATOM 404 | CE  | CE  | . LYS LYS LYS A A 53 53 . 104.844 81.974 4.066 1.00 56.53 |
| 1 . .    |     |     |                                                           |
| ATOM 405 | NZ  | NZ  | . LYS LYS LYS A A 53 53 . 105.144 80.570 4.592 1.00 58.79 |
| 1 . .    |     |     |                                                           |
| ATOM 406 | C   | C   | . LYS LYS LYS A A 53 53 . 99.867 83.077 0.519 1.00 46.07  |
| 1 . .    |     |     |                                                           |
| ATOM 407 | O   | O   | . LYS LYS LYS A A 53 53 . 100.057 84.255 0.229 1.00 47.22 |
| 1 . .    |     |     |                                                           |
| ATOM 408 | N   | N   | . GLN GLN GLN A A 54 54 . 99.082 82.324 -0.248 1.00 46.14 |
| 1 . .    |     |     |                                                           |

























|          |     |     |                                                           |
|----------|-----|-----|-----------------------------------------------------------|
| ATOM 709 | N   | N   | . LEU LEU LEU A A 94 94 . 84.288 73.930 25.086 1.00 33.85 |
| 1 . .    |     |     |                                                           |
| ATOM 710 | CA  | CA  | . LEU LEU LEU A A 94 94 . 85.649 73.777 25.630 1.00 34.20 |
| 1 . .    |     |     |                                                           |
| ATOM 711 | CB  | CB  | . LEU LEU LEU A A 94 94 . 85.836 74.426 27.026 1.00 35.57 |
| 1 . .    |     |     |                                                           |
| ATOM 712 | CG  | CG  | . LEU LEU LEU A A 94 94 . 85.555 75.919 27.282 1.00 36.94 |
| 1 . .    |     |     |                                                           |
| ATOM 713 | CD1 | CD1 | . LEU LEU LEU A A 94 94 . 85.941 76.325 28.682 1.00 39.26 |
| 1 . .    |     |     |                                                           |
| ATOM 714 | CD2 | CD2 | . LEU LEU LEU A A 94 94 . 86.277 76.796 26.346 1.00 36.16 |
| 1 . .    |     |     |                                                           |
| ATOM 715 | C   | C   | . LEU LEU LEU A A 94 94 . 85.999 72.299 25.692 1.00 33.89 |
| 1 . .    |     |     |                                                           |
| ATOM 716 | O   | O   | . LEU LEU LEU A A 94 94 . 87.152 71.915 25.399 1.00 32.79 |
| 1 . .    |     |     |                                                           |
| ATOM 717 | N   | N   | . GLU GLU GLU A A 95 95 . 85.003 71.473 26.020 1.00 33.95 |
| 1 . .    |     |     |                                                           |
| ATOM 718 | CA  | CA  | . GLU GLU GLU A A 95 95 . 85.189 69.982 26.047 1.00 35.61 |
| 1 . .    |     |     |                                                           |
| ATOM 719 | CB  | CB  | . GLU GLU GLU A A 95 95 . 84.020 69.238 26.714 1.00 37.17 |
| 1 . .    |     |     |                                                           |
| ATOM 720 | CG  | CG  | . GLU GLU GLU A A 95 95 . 83.892 69.404 28.259 1.00 43.98 |
| 1 . .    |     |     |                                                           |
| ATOM 721 | CD  | CD  | . GLU GLU GLU A A 95 95 . 85.249 69.307 28.989 1.00 50.31 |
| 1 . .    |     |     |                                                           |
| ATOM 722 | OE1 | OE1 | . GLU GLU GLU A A 95 95 . 86.124 68.508 28.585 1.00 53.17 |
| 1 . .    |     |     |                                                           |
| ATOM 723 | OE2 | OE2 | . GLU GLU GLU A A 95 95 . 85.457 70.037 29.984 1.00 54.60 |
| 1 . .    |     |     |                                                           |
| ATOM 724 | C   | C   | . GLU GLU GLU A A 95 95 . 85.360 69.427 24.633 1.00 34.75 |
| 1 . .    |     |     |                                                           |
| ATOM 725 | O   | O   | . GLU GLU GLU A A 95 95 . 86.198 68.543 24.413 1.00 33.79 |
| 1 . .    |     |     |                                                           |
| ATOM 726 | N   | N   | . LEU LEU LEU A A 96 96 . 84.589 69.964 23.673 1.00 33.56 |
| 1 . .    |     |     |                                                           |
| ATOM 727 | CA  | CA  | . LEU LEU LEU A A 96 96 . 84.700 69.498 22.275 1.00 32.71 |
| 1 . .    |     |     |                                                           |
| ATOM 728 | CB  | CB  | . LEU LEU LEU A A 96 96 . 83.578 70.082 21.422 1.00 31.68 |
| 1 . .    |     |     |                                                           |
| ATOM 729 | CG  | CG  | . LEU LEU LEU A A 96 96 . 83.409 69.460 20.036 1.00 32.63 |
| 1 . .    |     |     |                                                           |
| ATOM 730 | CD1 | CD1 | . LEU LEU LEU A A 96 96 . 83.377 67.895 20.063 1.00 32.23 |
| 1 . .    |     |     |                                                           |
| ATOM 731 | CD2 | CD2 | . LEU LEU LEU A A 96 96 . 82.133 70.008 19.368 1.00 31.42 |
| 1 . .    |     |     |                                                           |
| ATOM 732 | C   | C   | . LEU LEU LEU A A 96 96 . 86.084 69.829 21.670 1.00 33.13 |
| 1 . .    |     |     |                                                           |
| ATOM 733 | O   | O   | . LEU LEU LEU A A 96 96 . 86.633 69.129 20.784 1.00 31.99 |
| 1 . .    |     |     |                                                           |
| ATOM 734 | N   | N   | . ASP ASP ASP A A 97 97 . 86.617 70.944 22.128 1.00 33.50 |
| 1 . .    |     |     |                                                           |
| ATOM 735 | CA  | CA  | . ASP ASP ASP A A 97 97 . 87.917 71.344 21.696 1.00 34.59 |
| 1 . .    |     |     |                                                           |
| ATOM 736 | CB  | CB  | . ASP ASP ASP A A 97 97 . 88.160 72.831 21.987 1.00 34.47 |
| 1 . .    |     |     |                                                           |
| ATOM 737 | CG  | CG  | . ASP ASP ASP A A 97 97 . 89.593 73.228 21.740 1.00 36.45 |
| 1 . .    |     |     |                                                           |
| ATOM 738 | OD1 | OD1 | . ASP ASP ASP A A 97 97 . 89.864 73.860 20.681 1.00 39.12 |
| 1 . .    |     |     |                                                           |



























































































|           |     |     |                   |         |                          |            |
|-----------|-----|-----|-------------------|---------|--------------------------|------------|
| ATOM 1939 | C   | C   | . ASP ASP ASP A A | 257 257 | . 114.137 99.201 23.800  | 1.00 43.04 |
| 1 . .     |     |     |                   |         |                          |            |
| ATOM 1940 | O   | O   | . ASP ASP ASP A A | 257 257 | . 113.257 98.911 22.961  | 1.00 43.52 |
| 1 . .     |     |     |                   |         |                          |            |
| ATOM 1941 | N   | N   | . LEU LEU LEU A A | 258 258 | . 114.262 100.393 24.368 | 1.00 42.89 |
| 1 . .     |     |     |                   |         |                          |            |
| ATOM 1942 | CA  | CA  | . LEU LEU LEU A A | 258 258 | . 113.439 101.537 24.078 | 1.00 43.35 |
| 1 . .     |     |     |                   |         |                          |            |
| ATOM 1943 | CB  | CB  | . LEU LEU LEU A A | 258 258 | . 113.679 102.604 25.164 | 1.00 43.46 |
| 1 . .     |     |     |                   |         |                          |            |
| ATOM 1944 | CG  | CG  | . LEU LEU LEU A A | 258 258 | . 113.134 102.208 26.541 | 1.00 42.97 |
| 1 . .     |     |     |                   |         |                          |            |
| ATOM 1945 | CD1 | CD1 | . LEU LEU LEU A A | 258 258 | . 113.417 103.336 27.544 | 1.00 42.52 |
| 1 . .     |     |     |                   |         |                          |            |
| ATOM 1946 | CD2 | CD2 | . LEU LEU LEU A A | 258 258 | . 111.597 101.888 26.441 | 1.00 42.55 |
| 1 . .     |     |     |                   |         |                          |            |
| ATOM 1947 | C   | C   | . LEU LEU LEU A A | 258 258 | . 113.626 102.161 22.693 | 1.00 43.74 |
| 1 . .     |     |     |                   |         |                          |            |
| ATOM 1948 | O   | O   | . LEU LEU LEU A A | 258 258 | . 113.072 103.227 22.428 | 1.00 43.76 |
| 1 . .     |     |     |                   |         |                          |            |
| ATOM 1949 | N   | N   | . ASP ASP ASP A A | 259 259 | . 114.389 101.509 21.808 | 1.00 43.88 |
| 1 . .     |     |     |                   |         |                          |            |
| ATOM 1950 | CA  | CA  | . ASP ASP ASP A A | 259 259 | . 114.479 101.942 20.401 | 1.00 43.15 |
| 1 . .     |     |     |                   |         |                          |            |
| ATOM 1951 | CB  | CB  | . ASP ASP ASP A A | 259 259 | . 115.763 102.792 20.193 | 1.00 44.03 |
| 1 . .     |     |     |                   |         |                          |            |
| ATOM 1952 | CG  | CG  | . ASP ASP ASP A A | 259 259 | . 115.756 103.653 18.900 | 1.00 47.62 |
| 1 . .     |     |     |                   |         |                          |            |
| ATOM 1953 | OD1 | OD1 | . ASP ASP ASP A A | 259 259 | . 114.684 103.802 18.211 | 1.00 49.94 |
| 1 . .     |     |     |                   |         |                          |            |
| ATOM 1954 | OD2 | OD2 | . ASP ASP ASP A A | 259 259 | . 116.877 104.204 18.571 | 1.00 51.24 |
| 1 . .     |     |     |                   |         |                          |            |
| ATOM 1955 | C   | C   | . ASP ASP ASP A A | 259 259 | . 114.369 100.690 19.503 | 1.00 41.97 |
| 1 . .     |     |     |                   |         |                          |            |
| ATOM 1956 | O   | O   | . ASP ASP ASP A A | 259 259 | . 114.932 100.611 18.444 | 1.00 41.30 |
| 1 . .     |     |     |                   |         |                          |            |
| ATOM 1957 | N   | N   | . PHE PHE PHE A A | 260 260 | . 113.556 99.726 19.915  | 1.00 42.63 |
| 1 . .     |     |     |                   |         |                          |            |
| ATOM 1958 | CA  | CA  | . PHE PHE PHE A A | 260 260 | . 113.442 98.442 19.226  | 1.00 42.14 |
| 1 . .     |     |     |                   |         |                          |            |
| ATOM 1959 | CB  | CB  | . PHE PHE PHE A A | 260 260 | . 112.545 97.535 20.042  | 1.00 42.01 |
| 1 . .     |     |     |                   |         |                          |            |
| ATOM 1960 | CG  | CG  | . PHE PHE PHE A A | 260 260 | . 111.072 97.831 19.899  | 1.00 40.89 |
| 1 . .     |     |     |                   |         |                          |            |
| ATOM 1961 | CD1 | CD1 | . PHE PHE PHE A A | 260 260 | . 110.457 98.789 20.697  | 1.00 40.32 |
| 1 . .     |     |     |                   |         |                          |            |
| ATOM 1962 | CE1 | CE1 | . PHE PHE PHE A A | 260 260 | . 109.046 99.049 20.571  | 1.00 41.76 |
| 1 . .     |     |     |                   |         |                          |            |
| ATOM 1963 | CZ  | CZ  | . PHE PHE PHE A A | 260 260 | . 108.249 98.309 19.632  | 1.00 41.29 |
| 1 . .     |     |     |                   |         |                          |            |
| ATOM 1964 | CE2 | CE2 | . PHE PHE PHE A A | 260 260 | . 108.872 97.334 18.835  | 1.00 41.90 |
| 1 . .     |     |     |                   |         |                          |            |
| ATOM 1965 | CD2 | CD2 | . PHE PHE PHE A A | 260 260 | . 110.289 97.104 18.984  | 1.00 41.98 |
| 1 . .     |     |     |                   |         |                          |            |
| ATOM 1966 | C   | C   | . PHE PHE PHE A A | 260 260 | . 112.975 98.500 17.755  | 1.00 43.20 |
| 1 . .     |     |     |                   |         |                          |            |
| ATOM 1967 | O   | O   | . PHE PHE PHE A A | 260 260 | . 113.138 97.520 17.000  | 1.00 41.67 |
| 1 . .     |     |     |                   |         |                          |            |
| ATOM 1968 | N   | N   | . LYS LYS LYS A A | 261 261 | . 112.375 99.629 17.340  | 1.00 44.59 |
| 1 . .     |     |     |                   |         |                          |            |









|           |     |     |                   |         |                          |            |
|-----------|-----|-----|-------------------|---------|--------------------------|------------|
| ATOM 2089 | N   | N   | . ALA ALA ALA A A | 277 277 | . 113.043 102.853 37.326 | 1.00 43.12 |
| 1 . .     |     |     |                   |         |                          |            |
| ATOM 2090 | CA  | CA  | . ALA ALA ALA A A | 277 277 | . 113.448 104.182 37.791 | 1.00 42.69 |
| 1 . .     |     |     |                   |         |                          |            |
| ATOM 2091 | CB  | CB  | . ALA ALA ALA A A | 277 277 | . 115.029 104.351 37.772 | 1.00 42.20 |
| 1 . .     |     |     |                   |         |                          |            |
| ATOM 2092 | C   | C   | . ALA ALA ALA A A | 277 277 | . 112.819 105.187 36.879 | 1.00 42.32 |
| 1 . .     |     |     |                   |         |                          |            |
| ATOM 2093 | O   | O   | . ALA ALA ALA A A | 277 277 | . 112.332 106.223 37.311 | 1.00 42.97 |
| 1 . .     |     |     |                   |         |                          |            |
| ATOM 2094 | N   | N   | . LEU LEU LEU A A | 278 278 | . 112.857 104.876 35.593 | 1.00 42.26 |
| 1 . .     |     |     |                   |         |                          |            |
| ATOM 2095 | CA  | CA  | . LEU LEU LEU A A | 278 278 | . 112.171 105.650 34.595 | 1.00 42.09 |
| 1 . .     |     |     |                   |         |                          |            |
| ATOM 2096 | CB  | CB  | . LEU LEU LEU A A | 278 278 | . 112.395 104.995 33.241 | 1.00 42.76 |
| 1 . .     |     |     |                   |         |                          |            |
| ATOM 2097 | CG  | CG  | . LEU LEU LEU A A | 278 278 | . 112.033 105.829 32.024 | 1.00 45.15 |
| 1 . .     |     |     |                   |         |                          |            |
| ATOM 2098 | CD1 | CD1 | . LEU LEU LEU A A | 278 278 | . 112.868 107.149 32.022 | 1.00 48.95 |
| 1 . .     |     |     |                   |         |                          |            |
| ATOM 2099 | CD2 | CD2 | . LEU LEU LEU A A | 278 278 | . 112.319 105.011 30.787 | 1.00 46.02 |
| 1 . .     |     |     |                   |         |                          |            |
| ATOM 2100 | C   | C   | . LEU LEU LEU A A | 278 278 | . 110.645 105.759 34.957 | 1.00 41.13 |
| 1 . .     |     |     |                   |         |                          |            |
| ATOM 2101 | O   | O   | . LEU LEU LEU A A | 278 278 | . 110.062 106.853 34.919 | 1.00 40.15 |
| 1 . .     |     |     |                   |         |                          |            |
| ATOM 2102 | N   | N   | . TYR TYR TYR A A | 279 279 | . 110.025 104.671 35.397 | 1.00 39.97 |
| 1 . .     |     |     |                   |         |                          |            |
| ATOM 2103 | CA  | CA  | . TYR TYR TYR A A | 279 279 | . 108.607 104.789 35.771 | 1.00 39.87 |
| 1 . .     |     |     |                   |         |                          |            |
| ATOM 2104 | CB  | CB  | . TYR TYR TYR A A | 279 279 | . 107.965 103.423 36.005 | 1.00 38.88 |
| 1 . .     |     |     |                   |         |                          |            |
| ATOM 2105 | CG  | CG  | . TYR TYR TYR A A | 279 279 | . 108.032 102.492 34.782 | 1.00 37.61 |
| 1 . .     |     |     |                   |         |                          |            |
| ATOM 2106 | CD1 | CD1 | . TYR TYR TYR A A | 279 279 | . 107.972 103.004 33.476 | 1.00 34.60 |
| 1 . .     |     |     |                   |         |                          |            |
| ATOM 2107 | CE1 | CE1 | . TYR TYR TYR A A | 279 279 | . 108.026 102.153 32.362 | 1.00 34.22 |
| 1 . .     |     |     |                   |         |                          |            |
| ATOM 2108 | CZ  | CZ  | . TYR TYR TYR A A | 279 279 | . 108.147 100.772 32.528 | 1.00 35.95 |
| 1 . .     |     |     |                   |         |                          |            |
| ATOM 2109 | OH  | OH  | . TYR TYR TYR A A | 279 279 | . 108.199 99.914 31.396  | 1.00 33.59 |
| 1 . .     |     |     |                   |         |                          |            |
| ATOM 2110 | CE2 | CE2 | . TYR TYR TYR A A | 279 279 | . 108.231 100.249 33.825 | 1.00 36.03 |
| 1 . .     |     |     |                   |         |                          |            |
| ATOM 2111 | CD2 | CD2 | . TYR TYR TYR A A | 279 279 | . 108.158 101.100 34.932 | 1.00 35.95 |
| 1 . .     |     |     |                   |         |                          |            |
| ATOM 2112 | C   | C   | . TYR TYR TYR A A | 279 279 | . 108.398 105.743 36.963 | 1.00 40.34 |
| 1 . .     |     |     |                   |         |                          |            |
| ATOM 2113 | O   | O   | . TYR TYR TYR A A | 279 279 | . 107.407 106.515 36.991 | 1.00 40.35 |
| 1 . .     |     |     |                   |         |                          |            |
| ATOM 2114 | N   | N   | . GLN GLN GLN A A | 280 280 | . 109.361 105.749 37.892 | 1.00 40.08 |
| 1 . .     |     |     |                   |         |                          |            |
| ATOM 2115 | CA  | CA  | . GLN GLN GLN A A | 280 280 | . 109.277 106.562 39.121 | 1.00 40.72 |
| 1 . .     |     |     |                   |         |                          |            |
| ATOM 2116 | CB  | CB  | . GLN GLN GLN A A | 280 280 | . 110.322 106.169 40.193 | 1.00 40.85 |
| 1 . .     |     |     |                   |         |                          |            |
| ATOM 2117 | CG  | CG  | . GLN GLN GLN A A | 280 280 | . 110.187 104.724 40.778 | 1.00 43.26 |
| 1 . .     |     |     |                   |         |                          |            |
| ATOM 2118 | CD  | CD  | . GLN GLN GLN A A | 280 280 | . 108.996 104.536 41.749 | 1.00 45.97 |
| 1 . .     |     |     |                   |         |                          |            |



































































































































































































































































































































































|      |      |   |   |   |     |     |     |   |   |     |     |   |        |         |        |      |       |
|------|------|---|---|---|-----|-----|-----|---|---|-----|-----|---|--------|---------|--------|------|-------|
| ATOM | 6829 | O | O | . | HOH | HOH | HOH | S | . | 178 | 178 | . | 89.663 | 130.678 | 15.839 | 1.00 | 58.92 |
| 1    | .    | . | . | . | .   | .   | .   | . | . | .   | .   | . | .      | .       | .      | .    | .     |
| ATOM | 6830 | O | O | . | HOH | HOH | HOH | S | . | 179 | 179 | . | 75.287 | 110.914 | 40.859 | 1.00 | 59.36 |
| 1    | .    | . | . | . | .   | .   | .   | . | . | .   | .   | . | .      | .       | .      | .    | .     |
| ATOM | 6831 | O | O | . | HOH | HOH | HOH | S | . | 180 | 180 | . | 75.290 | 80.301  | 32.779 | 1.00 | 39.05 |
| 1    | .    | . | . | . | .   | .   | .   | . | . | .   | .   | . | .      | .       | .      | .    | .     |
| ATOM | 6832 | O | O | . | HOH | HOH | HOH | S | . | 181 | 181 | . | 68.612 | 89.175  | -7.179 | 1.00 | 57.03 |
| 1    | .    | . | . | . | .   | .   | .   | . | . | .   | .   | . | .      | .       | .      | .    | .     |
| ATOM | 6833 | O | O | . | HOH | HOH | HOH | S | . | 182 | 182 | . | 94.301 | 101.198 | 24.400 | 1.00 | 27.62 |
| 1    | .    | . | . | . | .   | .   | .   | . | . | .   | .   | . | .      | .       | .      | .    | .     |
| ATOM | 6834 | O | O | . | HOH | HOH | HOH | S | . | 183 | 183 | . | 81.900 | 119.630 | 7.650  | 1.00 | 35.24 |
| 1    | .    | . | . | . | .   | .   | .   | . | . | .   | .   | . | .      | .       | .      | .    | .     |
| ATOM | 6835 | O | O | . | HOH | HOH | HOH | S | . | 184 | 184 | . | 76.681 | 84.680  | -3.582 | 1.00 | 42.74 |
| 1    | .    | . | . | . | .   | .   | .   | . | . | .   | .   | . | .      | .       | .      | .    | .     |

```

#
loop_
_atom_site_anisotrop.id
_atom_site_anisotrop.pdbx_auth_atom_id
_atom_site_anisotrop.pdbx_label_atom_id
_atom_site_anisotrop.pdbx_label_alt_id
_atom_site_anisotrop.pdbx_auth_comp_id
_atom_site_anisotrop.pdbx_label_comp_id
_atom_site_anisotrop.pdbx_orig_comp_id
_atom_site_anisotrop.pdbx_auth_asym_id
_atom_site_anisotrop.pdbx_label_asym_id
_atom_site_anisotrop.pdbx_auth_seq_id
_atom_site_anisotrop.pdbx_label_seq_id
_atom_site_anisotrop.pdbx_PDB_ins_code
_atom_site_anisotrop.U[1][1]
_atom_site_anisotrop.U[2][2]
_atom_site_anisotrop.U[3][3]
_atom_site_anisotrop.U[1][2]
_atom_site_anisotrop.U[1][3]
_atom_site_anisotrop.U[2][3]
_atom_site_anisotrop.pdbx_PDB_model_num
_atom_site_anisotrop.type_symbol
1  N  N  . SER SER SER A A 1 1 . 0.5592 0.5684 0.5599 0.0072 0.0150
0.0120 1 .
2  CA  CA  . SER SER SER A A 1 1 . 0.5542 0.5687 0.5547 -0.0041 0.0099
0.0049 1 .
3  CB  CB  . SER SER SER A A 1 1 . 0.5704 0.5740 0.5567 0.0027 0.0051
0.0026 1 .
4  OG  OG  . SER SER SER A A 1 1 . 0.5715 0.6586 0.5888 -0.0128 -0.0068
0.0050 1 .
5  C  C  . SER SER SER A A 1 1 . 0.5404 0.5472 0.5418 0.0029 0.0089
0.0020 1 .
6  O  O  . SER SER SER A A 1 1 . 0.5334 0.5526 0.5494 0.0035 0.0098
0.0093 1 .
7  N  N  . ILE ILE ILE A A 2 2 . 0.5133 0.5156 0.5237 -0.0014 0.0091 -
0.0014 1 .
8  CA  CA  . ILE ILE ILE A A 2 2 . 0.4907 0.4807 0.5055 0.0056 0.0183 -
0.0088 1 .
9  CB  CB  . ILE ILE ILE A A 2 2 . 0.4816 0.4629 0.4924 0.0006 0.0105 -
0.0098 1 .
10 CG1  CG1  . ILE ILE ILE A A 2 2 . 0.4643 0.4251 0.4584 0.0201 0.0311 -
0.0224 1 .
11 CD1  CD1  . ILE ILE ILE A A 2 2 . 0.4541 0.3747 0.4921 0.0403 0.0473 -
0.0399 1 .
12 CG2  CG2  . ILE ILE ILE A A 2 2 . 0.4802 0.4033 0.4967 0.0088 0.0412 -
0.0451 1 .

```

|        |     |     |                     |   |                                          |
|--------|-----|-----|---------------------|---|------------------------------------------|
| 13     | C   | C   | . ILE ILE ILE A A 2 | 2 | . 0.4824 0.4875 0.5050 -0.0018 0.0094 -  |
| 0.0060 | 1   | .   |                     |   |                                          |
| 14     | O   | O   | . ILE ILE ILE A A 2 | 2 | . 0.4757 0.4898 0.5129 -0.0050 0.0252 -  |
| 0.0018 | 1   | .   |                     |   |                                          |
| 15     | N   | N   | . GLN GLN GLN A A 3 | 3 | . 0.4843 0.4916 0.5142 0.0030 0.0036 -   |
| 0.0097 | 1   | .   |                     |   |                                          |
| 16     | CA  | CA  | . GLN GLN GLN A A 3 | 3 | . 0.4965 0.5070 0.5185 0.0020 0.0036 -   |
| 0.0101 | 1   | .   |                     |   |                                          |
| 17     | CB  | CB  | . GLN GLN GLN A A 3 | 3 | . 0.4968 0.4976 0.5199 0.0078 -0.0018    |
| 0.0019 | 1   | .   |                     |   |                                          |
| 18     | CG  | CG  | . GLN GLN GLN A A 3 | 3 | . 0.5064 0.5596 0.5392 -0.0018 0.0164 -  |
| 0.0063 | 1   | .   |                     |   |                                          |
| 19     | CD  | CD  | . GLN GLN GLN A A 3 | 3 | . 0.5522 0.6229 0.6081 -0.0081 0.0211    |
| 0.0039 | 1   | .   |                     |   |                                          |
| 20     | OE1 | OE1 | . GLN GLN GLN A A 3 | 3 | . 0.5690 0.6047 0.6519 -0.0089 0.0150 -  |
| 0.0012 | 1   | .   |                     |   |                                          |
| 21     | NE2 | NE2 | . GLN GLN GLN A A 3 | 3 | . 0.5772 0.6906 0.6528 -0.0486 0.0235    |
| 0.0051 | 1   | .   |                     |   |                                          |
| 22     | C   | C   | . GLN GLN GLN A A 3 | 3 | . 0.4941 0.4971 0.5229 -0.0012 0.0021 -  |
| 0.0111 | 1   | .   |                     |   |                                          |
| 23     | O   | O   | . GLN GLN GLN A A 3 | 3 | . 0.5010 0.5089 0.5334 -0.0095 -0.0060 - |
| 0.0254 | 1   | .   |                     |   |                                          |
| 24     | N   | N   | . LYS LYS LYS A A 4 | 4 | . 0.4971 0.4865 0.5263 0.0004 0.0033 -   |
| 0.0116 | 1   | .   |                     |   |                                          |
| 25     | CA  | CA  | . LYS LYS LYS A A 4 | 4 | . 0.4879 0.4883 0.5133 -0.0064 0.0056 -  |
| 0.0065 | 1   | .   |                     |   |                                          |
| 26     | CB  | CB  | . LYS LYS LYS A A 4 | 4 | . 0.4967 0.4976 0.5244 -0.0101 0.0012 -  |
| 0.0075 | 1   | .   |                     |   |                                          |
| 27     | CG  | CG  | . LYS LYS LYS A A 4 | 4 | . 0.5560 0.5344 0.5827 -0.0235 0.0068    |
| 0.0034 | 1   | .   |                     |   |                                          |
| 28     | CD  | CD  | . LYS LYS LYS A A 4 | 4 | . 0.6748 0.6268 0.5892 -0.0599 -0.0140 - |
| 0.0029 | 1   | .   |                     |   |                                          |
| 29     | CE  | CE  | . LYS LYS LYS A A 4 | 4 | . 0.7300 0.6474 0.6348 -0.0688 -0.0240 - |
| 0.0100 | 1   | .   |                     |   |                                          |
| 30     | NZ  | NZ  | . LYS LYS LYS A A 4 | 4 | . 0.7835 0.5672 0.6488 -0.0776 -0.0214   |
| 0.0248 | 1   | .   |                     |   |                                          |
| 31     | C   | C   | . LYS LYS LYS A A 4 | 4 | . 0.4646 0.4724 0.4931 -0.0052 0.0036 -  |
| 0.0077 | 1   | .   |                     |   |                                          |
| 32     | O   | O   | . LYS LYS LYS A A 4 | 4 | . 0.4448 0.4884 0.4938 -0.0109 -0.0001 - |
| 0.0069 | 1   | .   |                     |   |                                          |
| 33     | N   | N   | . ILE ILE ILE A A 5 | 5 | . 0.4534 0.4495 0.4817 -0.0024 -0.0044 - |
| 0.0067 | 1   | .   |                     |   |                                          |
| 34     | CA  | CA  | . ILE ILE ILE A A 5 | 5 | . 0.4429 0.4378 0.4680 -0.0043 0.0001 -  |
| 0.0077 | 1   | .   |                     |   |                                          |
| 35     | CB  | CB  | . ILE ILE ILE A A 5 | 5 | . 0.4358 0.4207 0.4599 -0.0129 0.0005 -  |
| 0.0081 | 1   | .   |                     |   |                                          |
| 36     | CG1 | CG1 | . ILE ILE ILE A A 5 | 5 | . 0.3872 0.3932 0.4383 -0.0311 0.0066 -  |
| 0.0054 | 1   | .   |                     |   |                                          |
| 37     | CD1 | CD1 | . ILE ILE ILE A A 5 | 5 | . 0.2613 0.3607 0.4372 -0.0405 0.0016 -  |
| 0.0316 | 1   | .   |                     |   |                                          |
| 38     | CG2 | CG2 | . ILE ILE ILE A A 5 | 5 | . 0.4393 0.4368 0.4478 -0.0017 0.0191 -  |
| 0.0176 | 1   | .   |                     |   |                                          |
| 39     | C   | C   | . ILE ILE ILE A A 5 | 5 | . 0.4506 0.4471 0.4728 -0.0048 0.0010 -  |
| 0.0051 | 1   | .   |                     |   |                                          |
| 40     | O   | O   | . ILE ILE ILE A A 5 | 5 | . 0.4546 0.4657 0.4813 -0.0101 0.0006 -  |
| 0.0175 | 1   | .   |                     |   |                                          |
| 41     | N   | N   | . TRP TRP TRP A A 6 | 6 | . 0.4539 0.4545 0.4733 -0.0074 -0.0019 - |
| 0.0083 | 1   | .   |                     |   |                                          |
| 42     | CA  | CA  | . TRP TRP TRP A A 6 | 6 | . 0.4626 0.4632 0.4660 -0.0110 0.0105 -  |
| 0.0076 | 1   | .   |                     |   |                                          |

|        |     |     |                       |                                        |
|--------|-----|-----|-----------------------|----------------------------------------|
| 43     | CB  | CB  | . TRP TRP TRP A A 6 6 | . 0.4923 0.4744 0.4950 0.0021 0.0103   |
| 0.0087 | 1   | .   |                       |                                        |
| 44     | CG  | CG  | . TRP TRP TRP A A 6 6 | . 0.6484 0.6093 0.5748 0.0073 0.0232   |
| 0.0048 | 1   | .   |                       |                                        |
| 45     | CD1 | CD1 | . TRP TRP TRP A A 6 6 | . 0.7434 0.5999 0.6534 0.0004 0.0216   |
| 0.0336 | 1   | .   |                       |                                        |
| 46     | NE1 | NE1 | . TRP TRP TRP A A 6 6 | . 0.7828 0.6671 0.7094 0.0212 0.0463   |
| 0.0248 | 1   | .   |                       |                                        |
| 47     | CE2 | CE2 | . TRP TRP TRP A A 6 6 | . 0.8042 0.6925 0.7196 0.0061 0.0360   |
| 0.0065 | 1   | .   |                       | -                                      |
| 48     | CD2 | CD2 | . TRP TRP TRP A A 6 6 | . 0.7847 0.6664 0.6791 0.0238 0.0173   |
| 0.0164 | 1   | .   |                       | -                                      |
| 49     | CE3 | CE3 | . TRP TRP TRP A A 6 6 | . 0.8309 0.7039 0.7143 0.0221 0.0094   |
| 0.0078 | 1   | .   |                       | -                                      |
| 50     | CZ3 | CZ3 | . TRP TRP TRP A A 6 6 | . 0.8339 0.7549 0.7373 0.0456 0.0084   |
| 0.0211 | 1   | .   |                       | -                                      |
| 51     | CH2 | CH2 | . TRP TRP TRP A A 6 6 | . 0.8482 0.7554 0.7674 0.0300 0.0086   |
| 0.0103 | 1   | .   |                       |                                        |
| 52     | CZ2 | CZ2 | . TRP TRP TRP A A 6 6 | . 0.8308 0.7359 0.7548 0.0173 0.0333   |
| 0.0151 | 1   | .   |                       | -                                      |
| 53     | C   | C   | . TRP TRP TRP A A 6 6 | . 0.4329 0.4382 0.4481 -0.0054 0.0150  |
| 0.0014 | 1   | .   |                       | -                                      |
| 54     | O   | O   | . TRP TRP TRP A A 6 6 | . 0.4311 0.4489 0.4719 -0.0326 0.0152  |
| 0.0118 | 1   | .   |                       | -                                      |
| 55     | N   | N   | . ALA ALA ALA A A 7 7 | . 0.3942 0.4030 0.4017 -0.0051 0.0138  |
| 0.0020 | 1   | .   |                       |                                        |
| 56     | CA  | CA  | . ALA ALA ALA A A 7 7 | . 0.3642 0.3758 0.3577 -0.0023 0.0099  |
| 0.0070 | 1   | .   |                       |                                        |
| 57     | CB  | CB  | . ALA ALA ALA A A 7 7 | . 0.3574 0.3758 0.3502 -0.0077 0.0156  |
| 0.0001 | 1   | .   |                       |                                        |
| 58     | C   | C   | . ALA ALA ALA A A 7 7 | . 0.3514 0.3623 0.3549 -0.0070 0.0049  |
| 0.0043 | 1   | .   |                       |                                        |
| 59     | O   | O   | . ALA ALA ALA A A 7 7 | . 0.3408 0.3728 0.3290 -0.0119 0.0080  |
| 0.0163 | 1   | .   |                       |                                        |
| 60     | N   | N   | . ARG ARG ARG A A 8 8 | . 0.3276 0.3614 0.3380 -0.0060 0.0023  |
| 0.0026 | 1   | .   |                       |                                        |
| 61     | CA  | CA  | . ARG ARG ARG A A 8 8 | . 0.3196 0.3447 0.3287 -0.0020 -0.0015 |
| 0.0025 | 1   | .   |                       | -                                      |
| 62     | CB  | CB  | . ARG ARG ARG A A 8 8 | . 0.3080 0.3154 0.3239 0.0036 0.0023   |
| 0.0024 | 1   | .   |                       | -                                      |
| 63     | CG  | CG  | . ARG ARG ARG A A 8 8 | . 0.3518 0.3262 0.3393 0.0060 -0.0065  |
| 0.0154 | 1   | .   |                       | -                                      |
| 64     | CD  | CD  | . ARG ARG ARG A A 8 8 | . 0.2377 0.3173 0.3091 0.0119 -0.0597  |
| 0.0282 | 1   | .   |                       | -                                      |
| 65     | NE  | NE  | . ARG ARG ARG A A 8 8 | . 0.3363 0.3821 0.3735 -0.0216 -0.0181 |
| 0.0273 | 1   | .   |                       | -                                      |
| 66     | CZ  | CZ  | . ARG ARG ARG A A 8 8 | . 0.3398 0.3954 0.3648 -0.0260 -0.0060 |
| 0.0368 | 1   | .   |                       | -                                      |
| 67     | NH1 | NH1 | . ARG ARG ARG A A 8 8 | . 0.2509 0.4038 0.4185 -0.0334 -0.0561 |
| 0.0551 | 1   | .   |                       | -                                      |
| 68     | NH2 | NH2 | . ARG ARG ARG A A 8 8 | . 0.3557 0.3865 0.4384 -0.0255 -0.0213 |
| 0.0366 | 1   | .   |                       | -                                      |
| 69     | C   | C   | . ARG ARG ARG A A 8 8 | . 0.3035 0.3331 0.3222 -0.0014 -0.0102 |
| 0.0097 | 1   | .   |                       | -                                      |
| 70     | O   | O   | . ARG ARG ARG A A 8 8 | . 0.2671 0.3358 0.3248 0.0179 -0.0185  |
| 0.0216 | 1   | .   |                       | -                                      |
| 71     | N   | N   | . GLU GLU GLU A A 9 9 | . 0.2953 0.3179 0.3164 -0.0001 -0.0083 |
| 0.0224 | 1   | .   |                       | -                                      |
| 72     | CA  | CA  | . GLU GLU GLU A A 9 9 | . 0.3376 0.3488 0.3404 0.0049 0.0027   |
| 0.0075 | 1   | .   |                       | -                                      |





|        |     |     |                           |        |        |        |         |         |   |
|--------|-----|-----|---------------------------|--------|--------|--------|---------|---------|---|
| 103    | O   | O   | . ASP ASP ASP A A 12 12 . | 0.1993 | 0.3413 | 0.2845 | 0.0348  | -0.0097 |   |
| 0.0038 | 1   | .   |                           |        |        |        |         |         |   |
| 104    | N   | N   | . SER SER SER A A 13 13 . | 0.2621 | 0.3151 | 0.2929 | 0.0125  | 0.0040  | - |
| 0.0026 | 1   | .   |                           |        |        |        |         |         |   |
| 105    | CA  | CA  | . SER SER SER A A 13 13 . | 0.3028 | 0.3300 | 0.3104 | -0.0052 | 0.0077  | - |
| 0.0081 | 1   | .   |                           |        |        |        |         |         |   |
| 106    | CB  | CB  | . SER SER SER A A 13 13 . | 0.3168 | 0.3250 | 0.3224 | 0.0068  | 0.0044  | - |
| 0.0084 | 1   | .   |                           |        |        |        |         |         |   |
| 107    | OG  | OG  | . SER SER SER A A 13 13 . | 0.3443 | 0.3907 | 0.3041 | 0.0046  | 0.0159  | - |
| 0.0362 | 1   | .   |                           |        |        |        |         |         |   |
| 108    | C   | C   | . SER SER SER A A 13 13 . | 0.3275 | 0.3318 | 0.3080 | -0.0133 | 0.0039  | - |
| 0.0005 | 1   | .   |                           |        |        |        |         |         |   |
| 109    | O   | O   | . SER SER SER A A 13 13 . | 0.3534 | 0.3559 | 0.3307 | -0.0305 | 0.0090  | - |
| 0.0138 | 1   | .   |                           |        |        |        |         |         |   |
| 110    | N   | N   | . ARG ARG ARG A A 14 14 . | 0.3067 | 0.3366 | 0.3005 | -0.0067 | 0.0019  | - |
| 0.0020 | 1   | .   |                           |        |        |        |         |         |   |
| 111    | CA  | CA  | . ARG ARG ARG A A 14 14 . | 0.3346 | 0.3504 | 0.3552 | -0.0182 | -0.0070 |   |
| 0.0047 | 1   | .   |                           |        |        |        |         |         |   |
| 112    | CB  | CB  | . ARG ARG ARG A A 14 14 . | 0.3256 | 0.3545 | 0.3787 | -0.0093 | -0.0147 |   |
| 0.0144 | 1   | .   |                           |        |        |        |         |         |   |
| 113    | CG  | CG  | . ARG ARG ARG A A 14 14 . | 0.4146 | 0.4222 | 0.4223 | -0.0293 | -0.0177 |   |
| 0.0075 | 1   | .   |                           |        |        |        |         |         |   |
| 114    | CD  | CD  | . ARG ARG ARG A A 14 14 . | 0.4656 | 0.4642 | 0.4428 | -0.0282 | -0.0289 |   |
| 0.0036 | 1   | .   |                           |        |        |        |         |         |   |
| 115    | NE  | NE  | . ARG ARG ARG A A 14 14 . | 0.4566 | 0.4551 | 0.4785 | -0.0104 | -0.0167 |   |
| 0.0194 | 1   | .   |                           |        |        |        |         |         |   |
| 116    | CZ  | CZ  | . ARG ARG ARG A A 14 14 . | 0.4436 | 0.4689 | 0.4759 | -0.0110 | -0.0071 |   |
| 0.0129 | 1   | .   |                           |        |        |        |         |         |   |
| 117    | NH1 | NH1 | . ARG ARG ARG A A 14 14 . | 0.5211 | 0.4196 | 0.4688 | -0.0048 | 0.0273  |   |
| 0.0126 | 1   | .   |                           |        |        |        |         |         |   |
| 118    | NH2 | NH2 | . ARG ARG ARG A A 14 14 . | 0.3449 | 0.4936 | 0.5272 | -0.0492 | 0.0222  |   |
| 0.0092 | 1   | .   |                           |        |        |        |         |         |   |
| 119    | C   | C   | . ARG ARG ARG A A 14 14 . | 0.3204 | 0.3479 | 0.3638 | -0.0152 | 0.0107  |   |
| 0.0007 | 1   | .   |                           |        |        |        |         |         |   |
| 120    | O   | O   | . ARG ARG ARG A A 14 14 . | 0.2600 | 0.3357 | 0.4114 | -0.0175 | 0.0130  |   |
| 0.0028 | 1   | .   |                           |        |        |        |         |         |   |
| 121    | N   | N   | . GLY GLY GLY A A 15 15 . | 0.2920 | 0.3534 | 0.3636 | -0.0215 | 0.0069  | - |
| 0.0042 | 1   | .   |                           |        |        |        |         |         |   |
| 122    | CA  | CA  | . GLY GLY GLY A A 15 15 . | 0.2987 | 0.3614 | 0.3766 | -0.0146 | 0.0112  | - |
| 0.0059 | 1   | .   |                           |        |        |        |         |         |   |
| 123    | C   | C   | . GLY GLY GLY A A 15 15 . | 0.3222 | 0.3690 | 0.3774 | -0.0204 | 0.0116  | - |
| 0.0076 | 1   | .   |                           |        |        |        |         |         |   |
| 124    | O   | O   | . GLY GLY GLY A A 15 15 . | 0.3462 | 0.3876 | 0.4066 | -0.0144 | 0.0162  | - |
| 0.0222 | 1   | .   |                           |        |        |        |         |         |   |
| 125    | N   | N   | . ASN ASN ASN A A 16 16 . | 0.3067 | 0.3660 | 0.3691 | -0.0184 | 0.0049  |   |
| 0.0007 | 1   | .   |                           |        |        |        |         |         |   |
| 126    | CA  | CA  | . ASN ASN ASN A A 16 16 . | 0.3120 | 0.3616 | 0.3579 | -0.0114 | -0.0002 | - |
| 0.0046 | 1   | .   |                           |        |        |        |         |         |   |
| 127    | CB  | CB  | . ASN ASN ASN A A 16 16 . | 0.3214 | 0.3785 | 0.3535 | -0.0213 | -0.0068 |   |
| 0.0122 | 1   | .   |                           |        |        |        |         |         |   |
| 128    | CG  | CG  | . ASN ASN ASN A A 16 16 . | 0.3498 | 0.4167 | 0.3926 | -0.0173 | 0.0104  |   |
| 0.0000 | 1   | .   |                           |        |        |        |         |         |   |
| 129    | OD1 | OD1 | . ASN ASN ASN A A 16 16 . | 0.4187 | 0.4233 | 0.3877 | -0.0242 | 0.0698  |   |
| 0.0266 | 1   | .   |                           |        |        |        |         |         |   |
| 130    | ND2 | ND2 | . ASN ASN ASN A A 16 16 . | 0.3498 | 0.4369 | 0.4432 | -0.0346 | 0.0018  | - |
| 0.0363 | 1   | .   |                           |        |        |        |         |         |   |
| 131    | C   | C   | . ASN ASN ASN A A 16 16 . | 0.3084 | 0.3416 | 0.3311 | -0.0150 | -0.0058 | - |
| 0.0103 | 1   | .   |                           |        |        |        |         |         |   |
| 132    | O   | O   | . ASN ASN ASN A A 16 16 . | 0.2816 | 0.3489 | 0.3157 | -0.0040 | -0.0185 | - |
| 0.0328 | 1   | .   |                           |        |        |        |         |         |   |





|        |     |     |                         |                                          |
|--------|-----|-----|-------------------------|------------------------------------------|
| 193    | OH  | OH  | . TYR TYR TYR A A 24 24 | . 0.4315 0.5909 0.5061 -0.0260 -0.0721   |
| 0.0791 | 1   | .   |                         |                                          |
| 194    | CE2 | CE2 | . TYR TYR TYR A A 24 24 | . 0.4473 0.5179 0.5205 -0.0374 -0.0368   |
| 0.0434 | 1   | .   |                         |                                          |
| 195    | CD2 | CD2 | . TYR TYR TYR A A 24 24 | . 0.4371 0.4911 0.5099 -0.0050 -0.0477   |
| 0.0289 | 1   | .   |                         |                                          |
| 196    | C   | C   | . TYR TYR TYR A A 24 24 | . 0.3976 0.4473 0.4537 -0.0037 -0.0086   |
| 0.0034 | 1   | .   |                         |                                          |
| 197    | O   | O   | . TYR TYR TYR A A 24 24 | . 0.4000 0.4666 0.4778 0.0093 -0.0155    |
| 0.0126 | 1   | .   |                         |                                          |
| 198    | N   | N   | . THR THR THR A A 25 25 | . 0.4103 0.4607 0.4685 0.0033 -0.0013    |
| 0.0029 | 1   | .   |                         |                                          |
| 199    | CA  | CA  | . THR THR THR A A 25 25 | . 0.4160 0.4748 0.4815 -0.0046 -0.0038   |
| 0.0107 | 1   | .   |                         |                                          |
| 200    | CB  | CB  | . THR THR THR A A 25 25 | . 0.3978 0.4545 0.4712 -0.0022 -0.0011 - |
| 0.0006 | 1   | .   |                         |                                          |
| 201    | OG1 | OG1 | . THR THR THR A A 25 25 | . 0.2821 0.4657 0.4614 -0.0089 -0.0050   |
| 0.0071 | 1   | .   |                         |                                          |
| 202    | CG2 | CG2 | . THR THR THR A A 25 25 | . 0.4101 0.4251 0.5013 -0.0101 -0.0175   |
| 0.0012 | 1   | .   |                         |                                          |
| 203    | C   | C   | . THR THR THR A A 25 25 | . 0.4373 0.5000 0.5041 -0.0005 0.0020    |
| 0.0132 | 1   | .   |                         |                                          |
| 204    | O   | O   | . THR THR THR A A 25 25 | . 0.4200 0.5166 0.4972 -0.0079 -0.0037   |
| 0.0190 | 1   | .   |                         |                                          |
| 205    | N   | N   | . ALA ALA ALA A A 26 26 | . 0.4791 0.5262 0.5365 -0.0009 0.0036    |
| 0.0165 | 1   | .   |                         |                                          |
| 206    | CA  | CA  | . ALA ALA ALA A A 26 26 | . 0.5015 0.5380 0.5580 0.0006 0.0077     |
| 0.0152 | 1   | .   |                         |                                          |
| 207    | CB  | CB  | . ALA ALA ALA A A 26 26 | . 0.5000 0.5350 0.5628 -0.0069 0.0131    |
| 0.0126 | 1   | .   |                         |                                          |
| 208    | C   | C   | . ALA ALA ALA A A 26 26 | . 0.5187 0.5427 0.5601 0.0009 0.0057     |
| 0.0217 | 1   | .   |                         |                                          |
| 209    | O   | O   | . ALA ALA ALA A A 26 26 | . 0.5076 0.5691 0.5654 -0.0072 0.0013    |
| 0.0363 | 1   | .   |                         |                                          |
| 210    | N   | N   | . LYS LYS LYS A A 27 27 | . 0.5230 0.5488 0.5547 -0.0048 0.0050    |
| 0.0165 | 1   | .   |                         |                                          |
| 211    | CA  | CA  | . LYS LYS LYS A A 27 27 | . 0.5415 0.5472 0.5617 0.0037 0.0072     |
| 0.0090 | 1   | .   |                         |                                          |
| 212    | CB  | CB  | . LYS LYS LYS A A 27 27 | . 0.5609 0.5542 0.5775 0.0051 0.0050     |
| 0.0073 | 1   | .   |                         |                                          |
| 213    | CG  | CG  | . LYS LYS LYS A A 27 27 | . 0.5939 0.6047 0.6107 0.0019 0.0301     |
| 0.0108 | 1   | .   |                         |                                          |
| 214    | CD  | CD  | . LYS LYS LYS A A 27 27 | . 0.6550 0.6978 0.6982 0.0237 0.0575     |
| 0.0203 | 1   | .   |                         |                                          |
| 215    | CE  | CE  | . LYS LYS LYS A A 27 27 | . 0.6966 0.7729 0.6915 0.0369 0.0538     |
| 0.0134 | 1   | .   |                         |                                          |
| 216    | NZ  | NZ  | . LYS LYS LYS A A 27 27 | . 0.6863 0.8149 0.7493 0.0426 0.0616     |
| 0.0086 | 1   | .   |                         |                                          |
| 217    | C   | C   | . LYS LYS LYS A A 27 27 | . 0.5364 0.5357 0.5672 0.0017 0.0077     |
| 0.0090 | 1   | .   |                         |                                          |
| 218    | O   | O   | . LYS LYS LYS A A 27 27 | . 0.5441 0.5557 0.5844 0.0003 0.0078     |
| 0.0150 | 1   | .   |                         |                                          |
| 219    | N   | N   | . GLY GLY GLY A A 28 28 | . 0.5216 0.5387 0.5496 -0.0029 0.0143    |
| 0.0171 | 1   | .   |                         |                                          |
| 220    | CA  | CA  | . GLY GLY GLY A A 28 28 | . 0.4936 0.5181 0.5298 -0.0023 0.0084    |
| 0.0131 | 1   | .   |                         |                                          |
| 221    | C   | C   | . GLY GLY GLY A A 28 28 | . 0.4807 0.5075 0.5094 -0.0031 0.0193    |
| 0.0123 | 1   | .   |                         |                                          |
| 222    | O   | O   | . GLY GLY GLY A A 28 28 | . 0.4435 0.5106 0.4933 -0.0150 0.0223    |
| 0.0199 | 1   | .   |                         |                                          |

|        |     |     |                         |                                         |
|--------|-----|-----|-------------------------|-----------------------------------------|
| 223    | N   | N   | . LEU LEU LEU A A 29 29 | . 0.4708 0.4862 0.5031 0.0015 0.0177    |
| 0.0125 | 1   | .   |                         |                                         |
| 224    | CA  | CA  | . LEU LEU LEU A A 29 29 | . 0.4755 0.4766 0.4836 0.0030 0.0153    |
| 0.0122 | 1   | .   |                         |                                         |
| 225    | CB  | CB  | . LEU LEU LEU A A 29 29 | . 0.4870 0.4835 0.4918 0.0059 0.0198    |
| 0.0220 | 1   | .   |                         |                                         |
| 226    | CG  | CG  | . LEU LEU LEU A A 29 29 | . 0.5179 0.5391 0.4965 -0.0040 0.0186   |
| 0.0385 | 1   | .   |                         |                                         |
| 227    | CD1 | CD1 | . LEU LEU LEU A A 29 29 | . 0.5977 0.5838 0.5566 0.0132 0.0195    |
| 0.0890 | 1   | .   |                         |                                         |
| 228    | CD2 | CD2 | . LEU LEU LEU A A 29 29 | . 0.5151 0.5640 0.4896 0.0078 0.0112    |
| 0.0891 | 1   | .   |                         |                                         |
| 229    | C   | C   | . LEU LEU LEU A A 29 29 | . 0.4420 0.4504 0.4621 0.0073 0.0142    |
| 0.0081 | 1   | .   |                         |                                         |
| 230    | O   | O   | . LEU LEU LEU A A 29 29 | . 0.4531 0.4492 0.4820 0.0141 0.0034    |
| 0.0051 | 1   | .   |                         |                                         |
| 231    | N   | N   | . PHE PHE PHE A A 30 30 | . 0.4176 0.4106 0.4159 0.0149 0.0212    |
| 0.0083 | 1   | .   |                         |                                         |
| 232    | CA  | CA  | . PHE PHE PHE A A 30 30 | . 0.3848 0.3774 0.4040 0.0011 0.0198 -  |
| 0.0026 | 1   | .   |                         |                                         |
| 233    | CB  | CB  | . PHE PHE PHE A A 30 30 | . 0.3709 0.3744 0.3823 0.0106 0.0089 -  |
| 0.0080 | 1   | .   |                         |                                         |
| 234    | CG  | CG  | . PHE PHE PHE A A 30 30 | . 0.4081 0.3947 0.4113 -0.0044 0.0149   |
| 0.0089 | 1   | .   |                         |                                         |
| 235    | CD1 | CD1 | . PHE PHE PHE A A 30 30 | . 0.3978 0.3812 0.4148 0.0051 0.0386    |
| 0.0011 | 1   | .   |                         |                                         |
| 236    | CE1 | CE1 | . PHE PHE PHE A A 30 30 | . 0.4179 0.3894 0.4609 -0.0233 0.0294   |
| 0.0046 | 1   | .   |                         |                                         |
| 237    | CZ  | CZ  | . PHE PHE PHE A A 30 30 | . 0.3620 0.4304 0.4406 -0.0084 0.0083 - |
| 0.0146 | 1   | .   |                         |                                         |
| 238    | CE2 | CE2 | . PHE PHE PHE A A 30 30 | . 0.4015 0.4075 0.4556 -0.0054 0.0151   |
| 0.0204 | 1   | .   |                         |                                         |
| 239    | CD2 | CD2 | . PHE PHE PHE A A 30 30 | . 0.3786 0.3920 0.4123 -0.0101 0.0203   |
| 0.0335 | 1   | .   |                         |                                         |
| 240    | C   | C   | . PHE PHE PHE A A 30 30 | . 0.3841 0.3676 0.3951 0.0013 0.0202 -  |
| 0.0030 | 1   | .   |                         |                                         |
| 241    | O   | O   | . PHE PHE PHE A A 30 30 | . 0.3863 0.3518 0.4168 0.0122 0.0196    |
| 0.0071 | 1   | .   |                         |                                         |
| 242    | N   | N   | . ARG ARG ARG A A 31 31 | . 0.3491 0.3518 0.3587 -0.0087 0.0210   |
| 0.0020 | 1   | .   |                         |                                         |
| 243    | CA  | CA  | . ARG ARG ARG A A 31 31 | . 0.3089 0.3401 0.3390 -0.0021 0.0134 - |
| 0.0007 | 1   | .   |                         |                                         |
| 244    | CB  | CB  | . ARG ARG ARG A A 31 31 | . 0.3193 0.3404 0.3569 0.0071 0.0220    |
| 0.0175 | 1   | .   |                         |                                         |
| 245    | CG  | CG  | . ARG ARG ARG A A 31 31 | . 0.3386 0.3688 0.3735 0.0102 0.0152    |
| 0.0356 | 1   | .   |                         |                                         |
| 246    | CD  | CD  | . ARG ARG ARG A A 31 31 | . 0.3510 0.3519 0.4033 0.0331 0.0037    |
| 0.0289 | 1   | .   |                         |                                         |
| 247    | NE  | NE  | . ARG ARG ARG A A 31 31 | . 0.4464 0.3749 0.4512 0.0207 -0.0081   |
| 0.0358 | 1   | .   |                         |                                         |
| 248    | CZ  | CZ  | . ARG ARG ARG A A 31 31 | . 0.4117 0.4583 0.5090 0.0120 0.0041    |
| 0.0121 | 1   | .   |                         |                                         |
| 249    | NH1 | NH1 | . ARG ARG ARG A A 31 31 | . 0.4060 0.4955 0.5757 0.0633 0.0774    |
| 0.0578 | 1   | .   |                         |                                         |
| 250    | NH2 | NH2 | . ARG ARG ARG A A 31 31 | . 0.3986 0.4852 0.5124 -0.0201 -0.0024  |
| 0.0145 | 1   | .   |                         |                                         |
| 251    | C   | C   | . ARG ARG ARG A A 31 31 | . 0.2967 0.3276 0.3265 0.0007 0.0186 -  |
| 0.0031 | 1   | .   |                         |                                         |
| 252    | O   | O   | . ARG ARG ARG A A 31 31 | . 0.2399 0.3040 0.3259 0.0020 0.0280 -  |
| 0.0118 | 1   | .   |                         |                                         |

|        |     |     |                         |                                          |
|--------|-----|-----|-------------------------|------------------------------------------|
| 253    | N   | N   | . ALA ALA ALA A A 32 32 | . 0.2849 0.2985 0.3139 0.0101 0.0031     |
| 0.0095 | 1   | .   |                         |                                          |
| 254    | CA  | CA  | . ALA ALA ALA A A 32 32 | . 0.2879 0.2850 0.2941 -0.0045 0.0104    |
| 0.0100 | 1   | .   |                         |                                          |
| 255    | CB  | CB  | . ALA ALA ALA A A 32 32 | . 0.3068 0.2924 0.3160 -0.0151 0.0105    |
| 0.0154 | 1   | .   |                         |                                          |
| 256    | C   | C   | . ALA ALA ALA A A 32 32 | . 0.2962 0.2909 0.2883 -0.0047 0.0152    |
| 0.0026 | 1   | .   |                         |                                          |
| 257    | O   | O   | . ALA ALA ALA A A 32 32 | . 0.3213 0.3094 0.3167 -0.0158 0.0409    |
| 0.0080 | 1   | .   |                         |                                          |
| 258    | N   | N   | . ALA ALA ALA A A 33 33 | . 0.2888 0.2852 0.2812 0.0011 0.0220 -   |
| 0.0013 | 1   | .   |                         |                                          |
| 259    | CA  | CA  | . ALA ALA ALA A A 33 33 | . 0.2671 0.2973 0.2846 0.0087 0.0083     |
| 0.0040 | 1   | .   |                         |                                          |
| 260    | CB  | CB  | . ALA ALA ALA A A 33 33 | . 0.2463 0.2988 0.2915 0.0100 0.0120 -   |
| 0.0049 | 1   | .   |                         |                                          |
| 261    | C   | C   | . ALA ALA ALA A A 33 33 | . 0.2984 0.3078 0.2872 0.0179 0.0073 -   |
| 0.0009 | 1   | .   |                         |                                          |
| 262    | O   | O   | . ALA ALA ALA A A 33 33 | . 0.3315 0.3057 0.3002 0.0330 0.0246 -   |
| 0.0118 | 1   | .   |                         |                                          |
| 263    | N   | N   | . VAL VAL VAL A A 34 34 | . 0.2790 0.3206 0.2951 0.0141 0.0018 -   |
| 0.0087 | 1   | .   |                         |                                          |
| 264    | CA  | CA  | . VAL VAL VAL A A 34 34 | . 0.3018 0.3182 0.3135 -0.0023 0.0046 -  |
| 0.0034 | 1   | .   |                         |                                          |
| 265    | CB  | CB  | . VAL VAL VAL A A 34 34 | . 0.3039 0.3094 0.3099 -0.0001 0.0000 -  |
| 0.0059 | 1   | .   |                         |                                          |
| 266    | CG1 | CG1 | . VAL VAL VAL A A 34 34 | . 0.3243 0.3213 0.2989 -0.0059 -0.0051 - |
| 0.0261 | 1   | .   |                         |                                          |
| 267    | CG2 | CG2 | . VAL VAL VAL A A 34 34 | . 0.3115 0.3387 0.2849 -0.0054 0.0114 -  |
| 0.0035 | 1   | .   |                         |                                          |
| 268    | C   | C   | . VAL VAL VAL A A 34 34 | . 0.2743 0.3174 0.3150 -0.0078 0.0091 -  |
| 0.0076 | 1   | .   |                         |                                          |
| 269    | O   | O   | . VAL VAL VAL A A 34 34 | . 0.2589 0.3211 0.3171 -0.0138 0.0102 -  |
| 0.0006 | 1   | .   |                         |                                          |
| 270    | N   | N   | . PRO PRO PRO A A 35 35 | . 0.2705 0.3117 0.3123 -0.0058 0.0073 -  |
| 0.0100 | 1   | .   |                         |                                          |
| 271    | CA  | CA  | . PRO PRO PRO A A 35 35 | . 0.2653 0.3067 0.3176 -0.0116 0.0178 -  |
| 0.0112 | 1   | .   |                         |                                          |
| 272    | CB  | CB  | . PRO PRO PRO A A 35 35 | . 0.2574 0.2925 0.3162 -0.0177 0.0103 -  |
| 0.0176 | 1   | .   |                         |                                          |
| 273    | CG  | CG  | . PRO PRO PRO A A 35 35 | . 0.2329 0.2671 0.3287 0.0070 0.0279 -   |
| 0.0233 | 1   | .   |                         |                                          |
| 274    | CD  | CD  | . PRO PRO PRO A A 35 35 | . 0.2753 0.3103 0.3274 -0.0048 0.0087 -  |
| 0.0101 | 1   | .   |                         |                                          |
| 275    | C   | C   | . PRO PRO PRO A A 35 35 | . 0.2845 0.3090 0.3302 -0.0047 0.0232 -  |
| 0.0137 | 1   | .   |                         |                                          |
| 276    | O   | O   | . PRO PRO PRO A A 35 35 | . 0.2907 0.3461 0.3020 -0.0140 0.0516 -  |
| 0.0191 | 1   | .   |                         |                                          |
| 277    | N   | N   | . SER SER SER A A 36 36 | . 0.2914 0.3297 0.3363 -0.0028 0.0202 -  |
| 0.0148 | 1   | .   |                         |                                          |
| 278    | CA  | CA  | . SER SER SER A A 36 36 | . 0.2936 0.3323 0.3387 0.0005 0.0060 -   |
| 0.0151 | 1   | .   |                         |                                          |
| 279    | CB  | CB  | . SER SER SER A A 36 36 | . 0.2937 0.3359 0.3544 -0.0005 0.0041 -  |
| 0.0050 | 1   | .   |                         |                                          |
| 280    | OG  | OG  | . SER SER SER A A 36 36 | . 0.3436 0.3824 0.4052 0.0276 0.0332 -   |
| 0.0385 | 1   | .   |                         |                                          |
| 281    | C   | C   | . SER SER SER A A 36 36 | . 0.3098 0.3405 0.3359 -0.0049 -0.0054 - |
| 0.0057 | 1   | .   |                         |                                          |
| 282    | O   | O   | . SER SER SER A A 36 36 | . 0.2841 0.3503 0.3201 -0.0170 -0.0060 - |
| 0.0143 | 1   | .   |                         |                                          |

|        |     |     |                           |        |        |        |         |         |   |
|--------|-----|-----|---------------------------|--------|--------|--------|---------|---------|---|
| 283    | N   | N   | . GLY GLY GLY A A 37 37 . | 0.3470 | 0.3727 | 0.3632 | -0.0113 | -0.0086 | - |
| 0.0052 | 1   | .   |                           |        |        |        |         |         |   |
| 284    | CA  | CA  | . GLY GLY GLY A A 37 37 . | 0.3508 | 0.3773 | 0.3595 | -0.0032 | -0.0171 | - |
| 0.0119 | 1   | .   |                           |        |        |        |         |         |   |
| 285    | C   | C   | . GLY GLY GLY A A 37 37 . | 0.3714 | 0.3914 | 0.3766 | 0.0038  | -0.0161 | - |
| 0.0094 | 1   | .   |                           |        |        |        |         |         |   |
| 286    | O   | O   | . GLY GLY GLY A A 37 37 . | 0.3887 | 0.4139 | 0.3536 | 0.0021  | -0.0326 | - |
| 0.0224 | 1   | .   |                           |        |        |        |         |         |   |
| 287    | N   | N   | . ALA ALA ALA A A 38 38 . | 0.3879 | 0.3833 | 0.3946 | 0.0067  | -0.0135 | - |
| 0.0055 | 1   | .   |                           |        |        |        |         |         |   |
| 288    | CA  | CA  | . ALA ALA ALA A A 38 38 . | 0.3836 | 0.3929 | 0.4083 | 0.0138  | -0.0028 | - |
| 0.0026 | 1   | .   |                           |        |        |        |         |         |   |
| 289    | CB  | CB  | . ALA ALA ALA A A 38 38 . | 0.3896 | 0.4122 | 0.4240 | 0.0127  | 0.0046  | - |
| 0.0097 | 1   | .   |                           |        |        |        |         |         |   |
| 290    | C   | C   | . ALA ALA ALA A A 38 38 . | 0.3925 | 0.4104 | 0.4201 | 0.0131  | -0.0020 | - |
| 0.0173 | 1   | .   |                           |        |        |        |         |         |   |
| 291    | O   | O   | . ALA ALA ALA A A 38 38 . | 0.3718 | 0.3975 | 0.4255 | 0.0299  | 0.0123  | - |
| 0.0406 | 1   | .   |                           |        |        |        |         |         |   |
| 292    | N   | N   | . SER SER SER A A 39 39 . | 0.3910 | 0.4142 | 0.4127 | 0.0074  | -0.0032 | - |
| 0.0153 | 1   | .   |                           |        |        |        |         |         |   |
| 293    | CA  | CA  | . SER SER SER A A 39 39 . | 0.3841 | 0.4108 | 0.3942 | 0.0066  | -0.0065 | - |
| 0.0042 | 1   | .   |                           |        |        |        |         |         |   |
| 294    | CB  | CB  | . SER SER SER A A 39 39 . | 0.3709 | 0.4070 | 0.4087 | -0.0014 | -0.0008 | - |
| 0.0066 | 1   | .   |                           |        |        |        |         |         |   |
| 295    | OG  | OG  | . SER SER SER A A 39 39 . | 0.3566 | 0.4078 | 0.3945 | 0.0331  | 0.0128  | - |
| 0.0159 | 1   | .   |                           |        |        |        |         |         |   |
| 296    | C   | C   | . SER SER SER A A 39 39 . | 0.3784 | 0.4150 | 0.4005 | 0.0050  | -0.0210 | - |
| 0.0058 | 1   | .   |                           |        |        |        |         |         |   |
| 297    | O   | O   | . SER SER SER A A 39 39 . | 0.3311 | 0.4132 | 0.3735 | -0.0035 | -0.0240 | - |
| 0.0020 | 1   | .   |                           |        |        |        |         |         |   |
| 298    | N   | N   | . THR THR THR A A 40 40 . | 0.3913 | 0.4175 | 0.4127 | 0.0216  | -0.0238 | - |
| 0.0010 | 1   | .   |                           |        |        |        |         |         |   |
| 299    | CA  | CA  | . THR THR THR A A 40 40 . | 0.4028 | 0.4295 | 0.4224 | 0.0269  | -0.0097 | - |
| 0.0045 | 1   | .   |                           |        |        |        |         |         |   |
| 300    | CB  | CB  | . THR THR THR A A 40 40 . | 0.4054 | 0.4397 | 0.4345 | 0.0252  | -0.0050 | - |
| 0.0080 | 1   | .   |                           |        |        |        |         |         |   |
| 301    | OG1 | OG1 | . THR THR THR A A 40 40 . | 0.4213 | 0.4623 | 0.4551 | 0.0276  | 0.0236  | - |
| 0.0059 | 1   | .   |                           |        |        |        |         |         |   |
| 302    | CG2 | CG2 | . THR THR THR A A 40 40 . | 0.4251 | 0.4103 | 0.3749 | 0.0550  | -0.0079 | - |
| 0.0274 | 1   | .   |                           |        |        |        |         |         |   |
| 303    | C   | C   | . THR THR THR A A 40 40 . | 0.4325 | 0.4377 | 0.4403 | 0.0254  | -0.0034 | - |
| 0.0040 | 1   | .   |                           |        |        |        |         |         |   |
| 304    | O   | O   | . THR THR THR A A 40 40 . | 0.3776 | 0.4292 | 0.4413 | 0.0528  | 0.0034  | - |
| 0.0156 | 1   | .   |                           |        |        |        |         |         |   |
| 305    | N   | N   | . GLY GLY GLY A A 41 41 . | 0.4350 | 0.4354 | 0.4325 | 0.0244  | 0.0048  | - |
| 0.0015 | 1   | .   |                           |        |        |        |         |         |   |
| 306    | CA  | CA  | . GLY GLY GLY A A 41 41 . | 0.4606 | 0.4411 | 0.4491 | 0.0204  | -0.0183 | - |
| 0.0093 | 1   | .   |                           |        |        |        |         |         |   |
| 307    | C   | C   | . GLY GLY GLY A A 41 41 . | 0.4533 | 0.4468 | 0.4601 | 0.0164  | -0.0233 | - |
| 0.0067 | 1   | .   |                           |        |        |        |         |         |   |
| 308    | O   | O   | . GLY GLY GLY A A 41 41 . | 0.4320 | 0.4227 | 0.4594 | 0.0129  | -0.0456 | - |
| 0.0083 | 1   | .   |                           |        |        |        |         |         |   |
| 309    | N   | N   | . ILE ILE ILE A A 42 42 . | 0.4284 | 0.4579 | 0.4588 | 0.0140  | -0.0202 | - |
| 0.0080 | 1   | .   |                           |        |        |        |         |         |   |
| 310    | CA  | CA  | . ILE ILE ILE A A 42 42 . | 0.4261 | 0.4469 | 0.4645 | 0.0081  | -0.0165 | - |
| 0.0016 | 1   | .   |                           |        |        |        |         |         |   |
| 311    | CB  | CB  | . ILE ILE ILE A A 42 42 . | 0.4194 | 0.4608 | 0.4649 | 0.0081  | -0.0245 | - |
| 0.0015 | 1   | .   |                           |        |        |        |         |         |   |
| 312    | CG1 | CG1 | . ILE ILE ILE A A 42 42 . | 0.3985 | 0.4589 | 0.4706 | 0.0253  | -0.0191 | - |
| 0.0149 | 1   | .   |                           |        |        |        |         |         |   |





|        |     |     |                           |        |        |        |         |         |   |
|--------|-----|-----|---------------------------|--------|--------|--------|---------|---------|---|
| 343    | N   | N   | . LEU LEU LEU A A 46 46 . | 0.3298 | 0.3709 | 0.3931 | 0.0027  | -0.0009 | - |
| 0.0021 | 1   | .   |                           |        |        |        |         |         |   |
| 344    | CA  | CA  | . LEU LEU LEU A A 46 46 . | 0.3689 | 0.4084 | 0.4072 | 0.0008  | -0.0091 |   |
| 0.0005 | 1   | .   |                           |        |        |        |         |         |   |
| 345    | CB  | CB  | . LEU LEU LEU A A 46 46 . | 0.3948 | 0.4127 | 0.4292 | -0.0068 | 0.0083  |   |
| 0.0060 | 1   | .   |                           |        |        |        |         |         |   |
| 346    | CG  | CG  | . LEU LEU LEU A A 46 46 . | 0.4143 | 0.4571 | 0.4340 | -0.0356 | -0.0045 |   |
| 0.0158 | 1   | .   |                           |        |        |        |         |         |   |
| 347    | CD1 | CD1 | . LEU LEU LEU A A 46 46 . | 0.3386 | 0.4007 | 0.4638 | -0.0757 | -0.0427 |   |
| 0.0270 | 1   | .   |                           |        |        |        |         |         |   |
| 348    | CD2 | CD2 | . LEU LEU LEU A A 46 46 . | 0.3540 | 0.4894 | 0.5152 | -0.0428 | 0.0242  |   |
| 0.0489 | 1   | .   |                           |        |        |        |         |         |   |
| 349    | C   | C   | . LEU LEU LEU A A 46 46 . | 0.3830 | 0.4137 | 0.4069 | 0.0007  | -0.0109 |   |
| 0.0070 | 1   | .   |                           |        |        |        |         |         |   |
| 350    | O   | O   | . LEU LEU LEU A A 46 46 . | 0.3447 | 0.4369 | 0.3871 | 0.0031  | -0.0416 | - |
| 0.0092 | 1   | .   |                           |        |        |        |         |         |   |
| 351    | N   | N   | . GLU GLU GLU A A 47 47 . | 0.3955 | 0.4009 | 0.4108 | 0.0017  | -0.0138 |   |
| 0.0041 | 1   | .   |                           |        |        |        |         |         |   |
| 352    | CA  | CA  | . GLU GLU GLU A A 47 47 . | 0.4020 | 0.3978 | 0.4005 | -0.0007 | -0.0100 | - |
| 0.0038 | 1   | .   |                           |        |        |        |         |         |   |
| 353    | CB  | CB  | . GLU GLU GLU A A 47 47 . | 0.3988 | 0.3843 | 0.4089 | -0.0032 | -0.0016 |   |
| 0.0118 | 1   | .   |                           |        |        |        |         |         |   |
| 354    | CG  | CG  | . GLU GLU GLU A A 47 47 . | 0.3855 | 0.4012 | 0.4162 | -0.0216 | -0.0091 | - |
| 0.0164 | 1   | .   |                           |        |        |        |         |         |   |
| 355    | CD  | CD  | . GLU GLU GLU A A 47 47 . | 0.4045 | 0.4306 | 0.4702 | -0.0161 | 0.0206  |   |
| 0.0041 | 1   | .   |                           |        |        |        |         |         |   |
| 356    | OE1 | OE1 | . GLU GLU GLU A A 47 47 . | 0.3037 | 0.4439 | 0.4556 | -0.0243 | -0.0324 | - |
| 0.0331 | 1   | .   |                           |        |        |        |         |         |   |
| 357    | OE2 | OE2 | . GLU GLU GLU A A 47 47 . | 0.3566 | 0.4396 | 0.4778 | -0.0412 | 0.0347  |   |
| 0.0097 | 1   | .   |                           |        |        |        |         |         |   |
| 358    | C   | C   | . GLU GLU GLU A A 47 47 . | 0.3963 | 0.3907 | 0.3988 | 0.0050  | -0.0014 | - |
| 0.0003 | 1   | .   |                           |        |        |        |         |         |   |
| 359    | O   | O   | . GLU GLU GLU A A 47 47 . | 0.3742 | 0.3858 | 0.3824 | 0.0109  | 0.0274  |   |
| 0.0000 | 1   | .   |                           |        |        |        |         |         |   |
| 360    | N   | N   | . LEU LEU LEU A A 48 48 . | 0.3857 | 0.3772 | 0.3824 | 0.0058  | -0.0209 | - |
| 0.0109 | 1   | .   |                           |        |        |        |         |         |   |
| 361    | CA  | CA  | . LEU LEU LEU A A 48 48 . | 0.3785 | 0.3726 | 0.3950 | 0.0096  | -0.0038 | - |
| 0.0101 | 1   | .   |                           |        |        |        |         |         |   |
| 362    | CB  | CB  | . LEU LEU LEU A A 48 48 . | 0.3716 | 0.3837 | 0.4158 | -0.0007 | -0.0063 | - |
| 0.0186 | 1   | .   |                           |        |        |        |         |         |   |
| 363    | CG  | CG  | . LEU LEU LEU A A 48 48 . | 0.3715 | 0.4034 | 0.4360 | -0.0038 | 0.0017  | - |
| 0.0329 | 1   | .   |                           |        |        |        |         |         |   |
| 364    | CD1 | CD1 | . LEU LEU LEU A A 48 48 . | 0.4076 | 0.4139 | 0.4734 | 0.0198  | -0.0559 | - |
| 0.0156 | 1   | .   |                           |        |        |        |         |         |   |
| 365    | CD2 | CD2 | . LEU LEU LEU A A 48 48 . | 0.3415 | 0.4144 | 0.3974 | -0.0069 | -0.0083 | - |
| 0.0332 | 1   | .   |                           |        |        |        |         |         |   |
| 366    | C   | C   | . LEU LEU LEU A A 48 48 . | 0.3762 | 0.3684 | 0.3864 | 0.0092  | -0.0005 | - |
| 0.0124 | 1   | .   |                           |        |        |        |         |         |   |
| 367    | O   | O   | . LEU LEU LEU A A 48 48 . | 0.3229 | 0.3153 | 0.3460 | 0.0199  | 0.0075  | - |
| 0.0190 | 1   | .   |                           |        |        |        |         |         |   |
| 368    | N   | N   | . ARG ARG ARG A A 49 49 . | 0.3796 | 0.3752 | 0.4035 | 0.0187  | 0.0060  | - |
| 0.0082 | 1   | .   |                           |        |        |        |         |         |   |
| 369    | CA  | CA  | . ARG ARG ARG A A 49 49 . | 0.4183 | 0.4074 | 0.4216 | 0.0170  | 0.0057  | - |
| 0.0023 | 1   | .   |                           |        |        |        |         |         |   |
| 370    | CB  | CB  | . ARG ARG ARG A A 49 49 . | 0.4350 | 0.4153 | 0.4343 | 0.0092  | 0.0051  | - |
| 0.0115 | 1   | .   |                           |        |        |        |         |         |   |
| 371    | CG  | CG  | . ARG ARG ARG A A 49 49 . | 0.4801 | 0.4220 | 0.4305 | 0.0281  | 0.0236  | - |
| 0.0134 | 1   | .   |                           |        |        |        |         |         |   |
| 372    | CD  | CD  | . ARG ARG ARG A A 49 49 . | 0.4926 | 0.4369 | 0.4302 | 0.0323  | 0.0091  | - |
| 0.0008 | 1   | .   |                           |        |        |        |         |         |   |

|        |     |     |                           |        |        |        |         |         |   |
|--------|-----|-----|---------------------------|--------|--------|--------|---------|---------|---|
| 373    | NE  | NE  | . ARG ARG ARG A A 49 49 . | 0.5296 | 0.4548 | 0.4129 | 0.0536  | 0.0186  |   |
| 0.0115 | 1   | .   |                           |        |        |        |         |         |   |
| 374    | CZ  | CZ  | . ARG ARG ARG A A 49 49 . | 0.4508 | 0.4116 | 0.3736 | 0.0384  | -0.0016 |   |
| 0.0020 | 1   | .   |                           |        |        |        |         |         |   |
| 375    | NH1 | NH1 | . ARG ARG ARG A A 49 49 . | 0.2811 | 0.3834 | 0.3783 | 0.0464  | -0.0676 | - |
| 0.0435 | 1   | .   |                           |        |        |        |         |         |   |
| 376    | NH2 | NH2 | . ARG ARG ARG A A 49 49 . | 0.4328 | 0.4114 | 0.3543 | 0.0145  | 0.0130  | - |
| 0.0029 | 1   | .   |                           |        |        |        |         |         |   |
| 377    | C   | C   | . ARG ARG ARG A A 49 49 . | 0.4337 | 0.4208 | 0.4268 | 0.0135  | -0.0037 |   |
| 0.0002 | 1   | .   |                           |        |        |        |         |         |   |
| 378    | O   | O   | . ARG ARG ARG A A 49 49 . | 0.4332 | 0.4425 | 0.4300 | 0.0276  | -0.0151 |   |
| 0.0035 | 1   | .   |                           |        |        |        |         |         |   |
| 379    | N   | N   | . ASP ASP ASP A A 50 50 . | 0.4399 | 0.4386 | 0.4313 | 0.0116  | 0.0025  |   |
| 0.0103 | 1   | .   |                           |        |        |        |         |         |   |
| 380    | CA  | CA  | . ASP ASP ASP A A 50 50 . | 0.4372 | 0.4396 | 0.4225 | 0.0159  | 0.0043  |   |
| 0.0079 | 1   | .   |                           |        |        |        |         |         |   |
| 381    | CB  | CB  | . ASP ASP ASP A A 50 50 . | 0.3972 | 0.4226 | 0.3951 | 0.0194  | 0.0063  |   |
| 0.0142 | 1   | .   |                           |        |        |        |         |         |   |
| 382    | CG  | CG  | . ASP ASP ASP A A 50 50 . | 0.3891 | 0.4206 | 0.3794 | 0.0275  | -0.0007 |   |
| 0.0442 | 1   | .   |                           |        |        |        |         |         |   |
| 383    | OD1 | OD1 | . ASP ASP ASP A A 50 50 . | 0.2475 | 0.3914 | 0.3259 | 0.0524  | 0.0251  |   |
| 0.0384 | 1   | .   |                           |        |        |        |         |         |   |
| 384    | OD2 | OD2 | . ASP ASP ASP A A 50 50 . | 0.2447 | 0.3955 | 0.4453 | 0.0702  | -0.0278 |   |
| 0.0251 | 1   | .   |                           |        |        |        |         |         |   |
| 385    | C   | C   | . ASP ASP ASP A A 50 50 . | 0.4631 | 0.4591 | 0.4354 | 0.0182  | 0.0065  |   |
| 0.0074 | 1   | .   |                           |        |        |        |         |         |   |
| 386    | O   | O   | . ASP ASP ASP A A 50 50 . | 0.5000 | 0.4564 | 0.4249 | 0.0300  | -0.0006 |   |
| 0.0061 | 1   | .   |                           |        |        |        |         |         |   |
| 387    | N   | N   | . GLY GLY GLY A A 51 51 . | 0.4762 | 0.4656 | 0.4553 | 0.0118  | 0.0072  |   |
| 0.0080 | 1   | .   |                           |        |        |        |         |         |   |
| 388    | CA  | CA  | . GLY GLY GLY A A 51 51 . | 0.5000 | 0.4977 | 0.4877 | 0.0161  | 0.0121  |   |
| 0.0085 | 1   | .   |                           |        |        |        |         |         |   |
| 389    | C   | C   | . GLY GLY GLY A A 51 51 . | 0.5104 | 0.5099 | 0.5164 | 0.0156  | 0.0150  |   |
| 0.0070 | 1   | .   |                           |        |        |        |         |         |   |
| 390    | O   | O   | . GLY GLY GLY A A 51 51 . | 0.5304 | 0.5275 | 0.5347 | 0.0224  | 0.0194  |   |
| 0.0117 | 1   | .   |                           |        |        |        |         |         |   |
| 391    | N   | N   | . ASP ASP ASP A A 52 52 . | 0.5105 | 0.5093 | 0.5215 | 0.0118  | -0.0021 |   |
| 0.0077 | 1   | .   |                           |        |        |        |         |         |   |
| 392    | CA  | CA  | . ASP ASP ASP A A 52 52 . | 0.5260 | 0.5260 | 0.5432 | 0.0117  | 0.0061  |   |
| 0.0071 | 1   | .   |                           |        |        |        |         |         |   |
| 393    | CB  | CB  | . ASP ASP ASP A A 52 52 . | 0.5315 | 0.5197 | 0.5288 | 0.0152  | -0.0131 |   |
| 0.0027 | 1   | .   |                           |        |        |        |         |         |   |
| 394    | CG  | CG  | . ASP ASP ASP A A 52 52 . | 0.5446 | 0.5598 | 0.5573 | 0.0159  | -0.0064 |   |
| 0.0240 | 1   | .   |                           |        |        |        |         |         |   |
| 395    | OD1 | OD1 | . ASP ASP ASP A A 52 52 . | 0.5723 | 0.5119 | 0.5443 | 0.0100  | -0.0662 |   |
| 0.0082 | 1   | .   |                           |        |        |        |         |         |   |
| 396    | OD2 | OD2 | . ASP ASP ASP A A 52 52 . | 0.5511 | 0.5816 | 0.5617 | 0.0597  | 0.0261  |   |
| 0.0535 | 1   | .   |                           |        |        |        |         |         |   |
| 397    | C   | C   | . ASP ASP ASP A A 52 52 . | 0.5339 | 0.5419 | 0.5649 | 0.0127  | 0.0102  |   |
| 0.0131 | 1   | .   |                           |        |        |        |         |         |   |
| 398    | O   | O   | . ASP ASP ASP A A 52 52 . | 0.5315 | 0.5421 | 0.5681 | 0.0212  | 0.0152  |   |
| 0.0137 | 1   | .   |                           |        |        |        |         |         |   |
| 399    | N   | N   | . LYS LYS LYS A A 53 53 . | 0.5471 | 0.5591 | 0.5878 | 0.0219  | 0.0206  |   |
| 0.0153 | 1   | .   |                           |        |        |        |         |         |   |
| 400    | CA  | CA  | . LYS LYS LYS A A 53 53 . | 0.5578 | 0.5758 | 0.6085 | 0.0118  | 0.0186  |   |
| 0.0146 | 1   | .   |                           |        |        |        |         |         |   |
| 401    | CB  | CB  | . LYS LYS LYS A A 53 53 . | 0.5618 | 0.5770 | 0.6228 | 0.0108  | 0.0110  |   |
| 0.0192 | 1   | .   |                           |        |        |        |         |         |   |
| 402    | CG  | CG  | . LYS LYS LYS A A 53 53 . | 0.5900 | 0.6294 | 0.6464 | -0.0014 | -0.0036 |   |
| 0.0262 | 1   | .   |                           |        |        |        |         |         |   |



|        |     |     |                         |                                          |
|--------|-----|-----|-------------------------|------------------------------------------|
| 433    | CE1 | CE1 | . TYR TYR TYR A A 56 56 | . 0.3148 0.3564 0.3305 0.0445 0.0134     |
| 0.0028 | 1   | .   |                         |                                          |
| 434    | CZ  | CZ  | . TYR TYR TYR A A 56 56 | . 0.3000 0.3451 0.3035 0.0385 -0.0007 -  |
| 0.0114 | 1   | .   |                         |                                          |
| 435    | OH  | OH  | . TYR TYR TYR A A 56 56 | . 0.3195 0.3524 0.2784 0.1307 0.0828     |
| 0.0673 | 1   | .   |                         |                                          |
| 436    | CE2 | CE2 | . TYR TYR TYR A A 56 56 | . 0.3059 0.3452 0.3361 0.0221 0.0306 -   |
| 0.0222 | 1   | .   |                         |                                          |
| 437    | CD2 | CD2 | . TYR TYR TYR A A 56 56 | . 0.4030 0.3815 0.3366 0.0194 -0.0173    |
| 0.0200 | 1   | .   |                         |                                          |
| 438    | C   | C   | . TYR TYR TYR A A 56 56 | . 0.4275 0.4505 0.4422 0.0091 0.0065 -   |
| 0.0015 | 1   | .   |                         |                                          |
| 439    | O   | O   | . TYR TYR TYR A A 56 56 | . 0.4145 0.4533 0.4443 0.0164 0.0200 -   |
| 0.0100 | 1   | .   |                         |                                          |
| 440    | N   | N   | . LEU LEU LEU A A 57 57 | . 0.4521 0.4714 0.4603 0.0082 0.0065 -   |
| 0.0020 | 1   | .   |                         |                                          |
| 441    | CA  | CA  | . LEU LEU LEU A A 57 57 | . 0.4620 0.4904 0.4940 0.0060 0.0128 -   |
| 0.0050 | 1   | .   |                         |                                          |
| 442    | CB  | CB  | . LEU LEU LEU A A 57 57 | . 0.4629 0.5076 0.5197 0.0055 0.0129 -   |
| 0.0062 | 1   | .   |                         |                                          |
| 443    | CG  | CG  | . LEU LEU LEU A A 57 57 | . 0.5110 0.5356 0.6107 0.0097 0.0204     |
| 0.0192 | 1   | .   |                         |                                          |
| 444    | CD1 | CD1 | . LEU LEU LEU A A 57 57 | . 0.5231 0.5687 0.7241 0.0385 0.0410     |
| 0.0014 | 1   | .   |                         |                                          |
| 445    | CD2 | CD2 | . LEU LEU LEU A A 57 57 | . 0.5165 0.5833 0.7052 0.0193 0.0411     |
| 0.0046 | 1   | .   |                         |                                          |
| 446    | C   | C   | . LEU LEU LEU A A 57 57 | . 0.4654 0.4941 0.4830 0.0083 0.0057 -   |
| 0.0090 | 1   | .   |                         |                                          |
| 447    | O   | O   | . LEU LEU LEU A A 57 57 | . 0.4753 0.5276 0.5104 0.0086 -0.0044 -  |
| 0.0188 | 1   | .   |                         |                                          |
| 448    | N   | N   | . GLY GLY GLY A A 58 58 | . 0.4680 0.4923 0.4735 0.0027 0.0159 -   |
| 0.0034 | 1   | .   |                         |                                          |
| 449    | CA  | CA  | . GLY GLY GLY A A 58 58 | . 0.4477 0.4704 0.4746 0.0070 0.0147     |
| 0.0058 | 1   | .   |                         |                                          |
| 450    | C   | C   | . GLY GLY GLY A A 58 58 | . 0.4548 0.4609 0.4629 -0.0040 0.0068    |
| 0.0079 | 1   | .   |                         |                                          |
| 451    | O   | O   | . GLY GLY GLY A A 58 58 | . 0.4411 0.4565 0.4786 -0.0125 0.0060    |
| 0.0128 | 1   | .   |                         |                                          |
| 452    | N   | N   | . LYS LYS LYS A A 59 59 | . 0.4178 0.4450 0.4524 0.0029 0.0016     |
| 0.0065 | 1   | .   |                         |                                          |
| 453    | CA  | CA  | . LYS LYS LYS A A 59 59 | . 0.4158 0.4438 0.4515 0.0023 -0.0081    |
| 0.0050 | 1   | .   |                         |                                          |
| 454    | CB  | CB  | . LYS LYS LYS A A 59 59 | . 0.4279 0.4509 0.4545 0.0013 -0.0135    |
| 0.0089 | 1   | .   |                         |                                          |
| 455    | CG  | CG  | . LYS LYS LYS A A 59 59 | . 0.4656 0.5089 0.5095 -0.0034 -0.0066 - |
| 0.0002 | 1   | .   |                         |                                          |
| 456    | CD  | CD  | . LYS LYS LYS A A 59 59 | . 0.5608 0.5820 0.5898 -0.0211 -0.0244 - |
| 0.0385 | 1   | .   |                         |                                          |
| 457    | CE  | CE  | . LYS LYS LYS A A 59 59 | . 0.5855 0.6648 0.7026 -0.0085 -0.0062 - |
| 0.0445 | 1   | .   |                         |                                          |
| 458    | NZ  | NZ  | . LYS LYS LYS A A 59 59 | . 0.5802 0.7021 0.7764 0.0132 0.0011 -   |
| 0.0385 | 1   | .   |                         |                                          |
| 459    | C   | C   | . LYS LYS LYS A A 59 59 | . 0.4037 0.4329 0.4332 0.0020 -0.0079 -  |
| 0.0013 | 1   | .   |                         |                                          |
| 460    | O   | O   | . LYS LYS LYS A A 59 59 | . 0.4187 0.4657 0.4458 0.0036 -0.0186    |
| 0.0001 | 1   | .   |                         |                                          |
| 461    | N   | N   | . GLY GLY GLY A A 60 60 | . 0.3704 0.4070 0.4045 0.0016 -0.0093 -  |
| 0.0054 | 1   | .   |                         |                                          |
| 462    | CA  | CA  | . GLY GLY GLY A A 60 60 | . 0.3482 0.3835 0.3700 0.0030 -0.0120 -  |
| 0.0057 | 1   | .   |                         |                                          |

|        |     |     |                           |        |        |        |         |         |   |
|--------|-----|-----|---------------------------|--------|--------|--------|---------|---------|---|
| 463    | C   | C   | . GLY GLY GLY A A 60 60 . | 0.3192 | 0.3704 | 0.3617 | 0.0034  | -0.0077 | - |
| 0.0125 | 1   | .   |                           |        |        |        |         |         |   |
| 464    | O   | O   | . GLY GLY GLY A A 60 60 . | 0.2992 | 0.3826 | 0.3292 | 0.0104  | -0.0328 | - |
| 0.0265 | 1   | .   |                           |        |        |        |         |         |   |
| 465    | N   | N   | . VAL VAL VAL A A 61 61 . | 0.2993 | 0.3440 | 0.3464 | 0.0064  | -0.0101 | - |
| 0.0210 | 1   | .   |                           |        |        |        |         |         |   |
| 466    | CA  | CA  | . VAL VAL VAL A A 61 61 . | 0.2743 | 0.3366 | 0.3230 | 0.0022  | -0.0041 | - |
| 0.0183 | 1   | .   |                           |        |        |        |         |         |   |
| 467    | CB  | CB  | . VAL VAL VAL A A 61 61 . | 0.2712 | 0.3490 | 0.3129 | 0.0056  | -0.0164 | - |
| 0.0189 | 1   | .   |                           |        |        |        |         |         |   |
| 468    | CG1 | CG1 | . VAL VAL VAL A A 61 61 . | 0.3340 | 0.3108 | 0.3488 | -0.0435 | 0.0225  |   |
| 0.0083 | 1   | .   |                           |        |        |        |         |         |   |
| 469    | CG2 | CG2 | . VAL VAL VAL A A 61 61 . | 0.3258 | 0.2841 | 0.2871 | 0.0353  | 0.0174  | - |
| 0.0303 | 1   | .   |                           |        |        |        |         |         |   |
| 470    | C   | C   | . VAL VAL VAL A A 61 61 . | 0.3128 | 0.3402 | 0.3300 | -0.0085 | 0.0086  | - |
| 0.0197 | 1   | .   |                           |        |        |        |         |         |   |
| 471    | O   | O   | . VAL VAL VAL A A 61 61 . | 0.2812 | 0.3328 | 0.2945 | -0.0299 | 0.0009  | - |
| 0.0432 | 1   | .   |                           |        |        |        |         |         |   |
| 472    | N   | N   | . LEU LEU LEU A A 62 62 . | 0.3119 | 0.3456 | 0.3314 | -0.0126 | 0.0072  | - |
| 0.0194 | 1   | .   |                           |        |        |        |         |         |   |
| 473    | CA  | CA  | . LEU LEU LEU A A 62 62 . | 0.3435 | 0.3656 | 0.3415 | -0.0035 | 0.0048  | - |
| 0.0055 | 1   | .   |                           |        |        |        |         |         |   |
| 474    | CB  | CB  | . LEU LEU LEU A A 62 62 . | 0.3303 | 0.3814 | 0.3449 | 0.0111  | 0.0070  |   |
| 0.0047 | 1   | .   |                           |        |        |        |         |         |   |
| 475    | CG  | CG  | . LEU LEU LEU A A 62 62 . | 0.3596 | 0.3870 | 0.3604 | 0.0131  | 0.0107  |   |
| 0.0132 | 1   | .   |                           |        |        |        |         |         |   |
| 476    | CD1 | CD1 | . LEU LEU LEU A A 62 62 . | 0.4331 | 0.4589 | 0.3854 | -0.0010 | 0.0423  |   |
| 0.0252 | 1   | .   |                           |        |        |        |         |         |   |
| 477    | CD2 | CD2 | . LEU LEU LEU A A 62 62 . | 0.3222 | 0.3214 | 0.4341 | 0.0113  | -0.0152 |   |
| 0.0560 | 1   | .   |                           |        |        |        |         |         |   |
| 478    | C   | C   | . LEU LEU LEU A A 62 62 . | 0.3350 | 0.3539 | 0.3500 | 0.0007  | 0.0066  | - |
| 0.0038 | 1   | .   |                           |        |        |        |         |         |   |
| 479    | O   | O   | . LEU LEU LEU A A 62 62 . | 0.2916 | 0.3426 | 0.3670 | -0.0138 | -0.0085 | - |
| 0.0257 | 1   | .   |                           |        |        |        |         |         |   |
| 480    | N   | N   | . LYS LYS LYS A A 63 63 . | 0.3201 | 0.3499 | 0.3157 | -0.0007 | -0.0083 | - |
| 0.0085 | 1   | .   |                           |        |        |        |         |         |   |
| 481    | CA  | CA  | . LYS LYS LYS A A 63 63 . | 0.3371 | 0.3488 | 0.3418 | 0.0074  | 0.0035  |   |
| 0.0004 | 1   | .   |                           |        |        |        |         |         |   |
| 482    | CB  | CB  | . LYS LYS LYS A A 63 63 . | 0.3227 | 0.3491 | 0.3504 | 0.0107  | 0.0034  | - |
| 0.0024 | 1   | .   |                           |        |        |        |         |         |   |
| 483    | CG  | CG  | . LYS LYS LYS A A 63 63 . | 0.3645 | 0.3668 | 0.3670 | 0.0185  | 0.0135  | - |
| 0.0009 | 1   | .   |                           |        |        |        |         |         |   |
| 484    | CD  | CD  | . LYS LYS LYS A A 63 63 . | 0.3315 | 0.4179 | 0.3778 | 0.0308  | -0.0019 | - |
| 0.0094 | 1   | .   |                           |        |        |        |         |         |   |
| 485    | CE  | CE  | . LYS LYS LYS A A 63 63 . | 0.4021 | 0.4502 | 0.4150 | 0.0450  | -0.0198 | - |
| 0.0412 | 1   | .   |                           |        |        |        |         |         |   |
| 486    | NZ  | NZ  | . LYS LYS LYS A A 63 63 . | 0.4268 | 0.5529 | 0.4766 | 0.0356  | -0.0034 | - |
| 0.0549 | 1   | .   |                           |        |        |        |         |         |   |
| 487    | C   | C   | . LYS LYS LYS A A 63 63 . | 0.3342 | 0.3436 | 0.3345 | 0.0083  | 0.0011  | - |
| 0.0005 | 1   | .   |                           |        |        |        |         |         |   |
| 488    | O   | O   | . LYS LYS LYS A A 63 63 . | 0.3271 | 0.3553 | 0.3314 | 0.0117  | -0.0023 |   |
| 0.0148 | 1   | .   |                           |        |        |        |         |         |   |
| 489    | N   | N   | . ALA ALA ALA A A 64 64 . | 0.3290 | 0.3518 | 0.3226 | 0.0125  | -0.0087 |   |
| 0.0050 | 1   | .   |                           |        |        |        |         |         |   |
| 490    | CA  | CA  | . ALA ALA ALA A A 64 64 . | 0.3094 | 0.3494 | 0.3240 | 0.0283  | -0.0172 |   |
| 0.0036 | 1   | .   |                           |        |        |        |         |         |   |
| 491    | CB  | CB  | . ALA ALA ALA A A 64 64 . | 0.2684 | 0.3340 | 0.2896 | 0.0363  | -0.0352 | - |
| 0.0004 | 1   | .   |                           |        |        |        |         |         |   |
| 492    | C   | C   | . ALA ALA ALA A A 64 64 . | 0.3115 | 0.3577 | 0.3296 | 0.0188  | -0.0227 |   |
| 0.0155 | 1   | .   |                           |        |        |        |         |         |   |



|        |     |     |                         |                                          |
|--------|-----|-----|-------------------------|------------------------------------------|
| 523    | CD1 | CD1 | . ILE ILE ILE A A 68 68 | . 0.2526 0.2959 0.2833 0.0354 -0.0276    |
| 0.0130 | 1   | .   |                         |                                          |
| 524    | CG2 | CG2 | . ILE ILE ILE A A 68 68 | . 0.2202 0.2393 0.2716 0.0077 -0.0032 -  |
| 0.0089 | 1   | .   |                         |                                          |
| 525    | C   | C   | . ILE ILE ILE A A 68 68 | . 0.3158 0.3205 0.3214 -0.0019 -0.0026 - |
| 0.0034 | 1   | .   |                         |                                          |
| 526    | O   | O   | . ILE ILE ILE A A 68 68 | . 0.3617 0.3069 0.3344 -0.0078 -0.0096 - |
| 0.0192 | 1   | .   |                         |                                          |
| 527    | N   | N   | . ASN ASN ASN A A 69 69 | . 0.3175 0.3353 0.3392 -0.0015 -0.0007   |
| 0.0065 | 1   | .   |                         |                                          |
| 528    | CA  | CA  | . ASN ASN ASN A A 69 69 | . 0.3572 0.3465 0.3542 -0.0106 -0.0056   |
| 0.0073 | 1   | .   |                         |                                          |
| 529    | CB  | CB  | . ASN ASN ASN A A 69 69 | . 0.3480 0.3517 0.3637 0.0027 -0.0008    |
| 0.0122 | 1   | .   |                         |                                          |
| 530    | CG  | CG  | . ASN ASN ASN A A 69 69 | . 0.3693 0.3456 0.3861 -0.0024 0.0071 -  |
| 0.0055 | 1   | .   |                         |                                          |
| 531    | OD1 | OD1 | . ASN ASN ASN A A 69 69 | . 0.3810 0.3892 0.4511 -0.0033 0.0157 -  |
| 0.0054 | 1   | .   |                         |                                          |
| 532    | ND2 | ND2 | . ASN ASN ASN A A 69 69 | . 0.2635 0.3909 0.4351 0.0281 0.0188     |
| 0.0000 | 1   | .   |                         |                                          |
| 533    | C   | C   | . ASN ASN ASN A A 69 69 | . 0.3540 0.3621 0.3590 -0.0093 -0.0049   |
| 0.0051 | 1   | .   |                         |                                          |
| 534    | O   | O   | . ASN ASN ASN A A 69 69 | . 0.3203 0.3604 0.3584 -0.0295 -0.0132   |
| 0.0097 | 1   | .   |                         |                                          |
| 535    | N   | N   | . SER SER SER A A 70 70 | . 0.3491 0.3581 0.3627 0.0066 -0.0028    |
| 0.0035 | 1   | .   |                         |                                          |
| 536    | CA  | CA  | . SER SER SER A A 70 70 | . 0.3505 0.3668 0.3858 0.0022 -0.0039 -  |
| 0.0006 | 1   | .   |                         |                                          |
| 537    | CB  | CB  | . SER SER SER A A 70 70 | . 0.3871 0.3735 0.3773 0.0044 0.0048     |
| 0.0007 | 1   | .   |                         |                                          |
| 538    | OG  | OG  | . SER SER SER A A 70 70 | . 0.3212 0.4353 0.4553 0.0261 -0.0405 -  |
| 0.0215 | 1   | .   |                         |                                          |
| 539    | C   | C   | . SER SER SER A A 70 70 | . 0.3530 0.3590 0.3818 -0.0038 -0.0005 - |
| 0.0047 | 1   | .   |                         |                                          |
| 540    | O   | O   | . SER SER SER A A 70 70 | . 0.3754 0.3544 0.4260 0.0010 0.0003 -   |
| 0.0014 | 1   | .   |                         |                                          |
| 541    | N   | N   | . THR THR THR A A 71 71 | . 0.3336 0.3435 0.3711 -0.0049 -0.0073 - |
| 0.0100 | 1   | .   |                         |                                          |
| 542    | CA  | CA  | . THR THR THR A A 71 71 | . 0.3085 0.3386 0.3515 -0.0046 -0.0034 - |
| 0.0014 | 1   | .   |                         |                                          |
| 543    | CB  | CB  | . THR THR THR A A 71 71 | . 0.3085 0.3555 0.3433 -0.0019 -0.0073 - |
| 0.0033 | 1   | .   |                         |                                          |
| 544    | OG1 | OG1 | . THR THR THR A A 71 71 | . 0.1970 0.3623 0.3253 -0.0244 -0.0034   |
| 0.0106 | 1   | .   |                         |                                          |
| 545    | CG2 | CG2 | . THR THR THR A A 71 71 | . 0.2512 0.3345 0.3005 -0.0141 -0.0183 - |
| 0.0066 | 1   | .   |                         |                                          |
| 546    | C   | C   | . THR THR THR A A 71 71 | . 0.3262 0.3411 0.3675 -0.0012 0.0000    |
| 0.0000 | 1   | .   |                         |                                          |
| 547    | O   | O   | . THR THR THR A A 71 71 | . 0.3473 0.3400 0.3838 -0.0113 -0.0063   |
| 0.0031 | 1   | .   |                         |                                          |
| 548    | N   | N   | . ILE ILE ILE A A 72 72 | . 0.3227 0.3585 0.3640 -0.0053 -0.0036 - |
| 0.0054 | 1   | .   |                         |                                          |
| 549    | CA  | CA  | . ILE ILE ILE A A 72 72 | . 0.3195 0.3532 0.3659 -0.0045 0.0038 -  |
| 0.0060 | 1   | .   |                         |                                          |
| 550    | CB  | CB  | . ILE ILE ILE A A 72 72 | . 0.3037 0.3397 0.3681 -0.0036 -0.0040 - |
| 0.0044 | 1   | .   |                         |                                          |
| 551    | CG1 | CG1 | . ILE ILE ILE A A 72 72 | . 0.3140 0.3594 0.4205 -0.0240 -0.0232 - |
| 0.0001 | 1   | .   |                         |                                          |
| 552    | CD1 | CD1 | . ILE ILE ILE A A 72 72 | . 0.2227 0.3869 0.4513 -0.0148 -0.0697   |
| 0.0063 | 1   | .   |                         |                                          |





|        |     |     |                         |                                         |
|--------|-----|-----|-------------------------|-----------------------------------------|
| 583    | CB  | CB  | . ILE ILE ILE A A 77 77 | . 0.4364 0.4413 0.4700 -0.0105 0.0008   |
| 0.0199 | 1   | .   |                         |                                         |
| 584    | CG1 | CG1 | . ILE ILE ILE A A 77 77 | . 0.4026 0.4523 0.4744 -0.0157 0.0151   |
| 0.0303 | 1   | .   |                         |                                         |
| 585    | CD1 | CD1 | . ILE ILE ILE A A 77 77 | . 0.4046 0.4373 0.4389 -0.0917 0.0724   |
| 0.0272 | 1   | .   |                         |                                         |
| 586    | CG2 | CG2 | . ILE ILE ILE A A 77 77 | . 0.4174 0.4007 0.4839 0.0008 -0.0123   |
| 0.0490 | 1   | .   |                         |                                         |
| 587    | C   | C   | . ILE ILE ILE A A 77 77 | . 0.4676 0.4629 0.4813 -0.0041 0.0092   |
| 0.0109 | 1   | .   |                         |                                         |
| 588    | O   | O   | . ILE ILE ILE A A 77 77 | . 0.4675 0.4721 0.4821 0.0029 0.0134    |
| 0.0132 | 1   | .   |                         |                                         |
| 589    | N   | N   | . SER SER SER A A 78 78 | . 0.4812 0.4767 0.4823 0.0026 0.0164    |
| 0.0018 | 1   | .   |                         |                                         |
| 590    | CA  | CA  | . SER SER SER A A 78 78 | . 0.4888 0.4815 0.4817 -0.0042 0.0147   |
| 0.0004 | 1   | .   |                         |                                         |
| 591    | CB  | CB  | . SER SER SER A A 78 78 | . 0.4989 0.4748 0.4844 -0.0036 0.0103   |
| 0.0012 | 1   | .   |                         |                                         |
| 592    | OG  | OG  | . SER SER SER A A 78 78 | . 0.4616 0.4324 0.5137 -0.0053 0.0224   |
| 0.0042 | 1   | .   |                         |                                         |
| 593    | C   | C   | . SER SER SER A A 78 78 | . 0.4978 0.4960 0.4840 -0.0110 0.0106 - |
| 0.0004 | 1   | .   |                         |                                         |
| 594    | O   | O   | . SER SER SER A A 78 78 | . 0.5153 0.5055 0.4914 -0.0270 0.0126   |
| 0.0017 | 1   | .   |                         |                                         |
| 595    | N   | N   | . SER SER SER A A 79 79 | . 0.4985 0.4959 0.4746 -0.0160 0.0027 - |
| 0.0117 | 1   | .   |                         |                                         |
| 596    | CA  | CA  | . SER SER SER A A 79 79 | . 0.4964 0.4977 0.4762 -0.0150 0.0088 - |
| 0.0061 | 1   | .   |                         |                                         |
| 597    | CB  | CB  | . SER SER SER A A 79 79 | . 0.4902 0.4854 0.4673 -0.0132 0.0106 - |
| 0.0107 | 1   | .   |                         |                                         |
| 598    | OG  | OG  | . SER SER SER A A 79 79 | . 0.4866 0.4861 0.4489 -0.0373 0.0503 - |
| 0.0122 | 1   | .   |                         |                                         |
| 599    | C   | C   | . SER SER SER A A 79 79 | . 0.4960 0.5016 0.4734 -0.0109 0.0034 - |
| 0.0052 | 1   | .   |                         |                                         |
| 600    | O   | O   | . SER SER SER A A 79 79 | . 0.5089 0.5129 0.4728 -0.0225 0.0024   |
| 0.0037 | 1   | .   |                         |                                         |
| 601    | N   | N   | . GLY GLY GLY A A 80 80 | . 0.5053 0.4929 0.4695 -0.0048 0.0042 - |
| 0.0040 | 1   | .   |                         |                                         |
| 602    | CA  | CA  | . GLY GLY GLY A A 80 80 | . 0.4907 0.4903 0.4776 -0.0069 0.0075 - |
| 0.0080 | 1   | .   |                         |                                         |
| 603    | C   | C   | . GLY GLY GLY A A 80 80 | . 0.4863 0.5002 0.4870 0.0024 0.0098 -  |
| 0.0027 | 1   | .   |                         |                                         |
| 604    | O   | O   | . GLY GLY GLY A A 80 80 | . 0.4727 0.5146 0.4974 -0.0019 0.0128   |
| 0.0002 | 1   | .   |                         |                                         |
| 605    | N   | N   | . LEU LEU LEU A A 81 81 | . 0.4836 0.4946 0.4849 -0.0001 0.0061 - |
| 0.0032 | 1   | .   |                         |                                         |
| 606    | CA  | CA  | . LEU LEU LEU A A 81 81 | . 0.4817 0.4840 0.4895 0.0068 0.0118 -  |
| 0.0011 | 1   | .   |                         |                                         |
| 607    | CB  | CB  | . LEU LEU LEU A A 81 81 | . 0.4757 0.4860 0.4817 0.0124 0.0137    |
| 0.0052 | 1   | .   |                         |                                         |
| 608    | CG  | CG  | . LEU LEU LEU A A 81 81 | . 0.4918 0.4878 0.4923 -0.0025 0.0234   |
| 0.0209 | 1   | .   |                         |                                         |
| 609    | CD1 | CD1 | . LEU LEU LEU A A 81 81 | . 0.4572 0.4070 0.4772 -0.0257 0.0037   |
| 0.0479 | 1   | .   |                         |                                         |
| 610    | CD2 | CD2 | . LEU LEU LEU A A 81 81 | . 0.5028 0.4760 0.5040 -0.0392 0.0736   |
| 0.0162 | 1   | .   |                         |                                         |
| 611    | C   | C   | . LEU LEU LEU A A 81 81 | . 0.4841 0.4849 0.4880 0.0084 0.0149    |
| 0.0009 | 1   | .   |                         |                                         |
| 612    | O   | O   | . LEU LEU LEU A A 81 81 | . 0.4884 0.4768 0.4952 0.0129 0.0231 -  |
| 0.0073 | 1   | .   |                         |                                         |





|        |     |     |                         |                                          |
|--------|-----|-----|-------------------------|------------------------------------------|
| 673    | CD1 | CD1 | . LEU LEU LEU A A 89 89 | . 0.2896 0.3264 0.3721 -0.0259 -0.0063 - |
| 0.0675 | 1   | .   |                         |                                          |
| 674    | CD2 | CD2 | . LEU LEU LEU A A 89 89 | . 0.3713 0.3350 0.3593 0.0196 0.0208     |
| 0.0042 | 1   | .   |                         |                                          |
| 675    | C   | C   | . LEU LEU LEU A A 89 89 | . 0.4244 0.4144 0.4150 -0.0069 0.0280    |
| 0.0166 | 1   | .   |                         |                                          |
| 676    | O   | O   | . LEU LEU LEU A A 89 89 | . 0.4135 0.4107 0.4399 0.0032 0.0383     |
| 0.0249 | 1   | .   |                         |                                          |
| 677    | N   | N   | . ASP ASP ASP A A 90 90 | . 0.4297 0.4210 0.3928 -0.0127 0.0188    |
| 0.0157 | 1   | .   |                         |                                          |
| 678    | CA  | CA  | . ASP ASP ASP A A 90 90 | . 0.4684 0.4324 0.4122 -0.0095 0.0165    |
| 0.0162 | 1   | .   |                         |                                          |
| 679    | CB  | CB  | . ASP ASP ASP A A 90 90 | . 0.4865 0.4273 0.4073 -0.0192 0.0145    |
| 0.0139 | 1   | .   |                         |                                          |
| 680    | CG  | CG  | . ASP ASP ASP A A 90 90 | . 0.5319 0.4567 0.4325 -0.0249 0.0083    |
| 0.0123 | 1   | .   |                         |                                          |
| 681    | OD1 | OD1 | . ASP ASP ASP A A 90 90 | . 0.5706 0.4670 0.4191 -0.0562 0.0200    |
| 0.0517 | 1   | .   |                         |                                          |
| 682    | OD2 | OD2 | . ASP ASP ASP A A 90 90 | . 0.6269 0.4407 0.4370 -0.0704 0.0138    |
| 0.0067 | 1   | .   |                         |                                          |
| 683    | C   | C   | . ASP ASP ASP A A 90 90 | . 0.4746 0.4184 0.4250 -0.0051 0.0239    |
| 0.0139 | 1   | .   |                         |                                          |
| 684    | O   | O   | . ASP ASP ASP A A 90 90 | . 0.4978 0.4157 0.4342 -0.0118 0.0353    |
| 0.0281 | 1   | .   |                         |                                          |
| 685    | N   | N   | . ASN ASN ASN A A 91 91 | . 0.4896 0.4306 0.4254 0.0034 0.0194     |
| 0.0111 | 1   | .   |                         |                                          |
| 686    | CA  | CA  | . ASN ASN ASN A A 91 91 | . 0.4715 0.4253 0.4376 0.0028 0.0151     |
| 0.0145 | 1   | .   |                         |                                          |
| 687    | CB  | CB  | . ASN ASN ASN A A 91 91 | . 0.4929 0.4361 0.4406 -0.0032 0.0221    |
| 0.0105 | 1   | .   |                         |                                          |
| 688    | CG  | CG  | . ASN ASN ASN A A 91 91 | . 0.5059 0.4679 0.4765 -0.0253 0.0167    |
| 0.0035 | 1   | .   |                         |                                          |
| 689    | OD1 | OD1 | . ASN ASN ASN A A 91 91 | . 0.5484 0.5104 0.5079 -0.0815 -0.0105   |
| 0.0013 | 1   | .   |                         |                                          |
| 690    | ND2 | ND2 | . ASN ASN ASN A A 91 91 | . 0.5750 0.4811 0.5050 -0.0260 0.0647 -  |
| 0.0003 | 1   | .   |                         |                                          |
| 691    | C   | C   | . ASN ASN ASN A A 91 91 | . 0.4530 0.4119 0.4371 0.0039 0.0083     |
| 0.0275 | 1   | .   |                         |                                          |
| 692    | O   | O   | . ASN ASN ASN A A 91 91 | . 0.4279 0.3992 0.4593 0.0078 0.0075     |
| 0.0382 | 1   | .   |                         |                                          |
| 693    | N   | N   | . LEU LEU LEU A A 92 92 | . 0.4219 0.3965 0.4425 -0.0023 0.0029    |
| 0.0302 | 1   | .   |                         |                                          |
| 694    | CA  | CA  | . LEU LEU LEU A A 92 92 | . 0.4298 0.4148 0.4597 0.0053 -0.0031    |
| 0.0227 | 1   | .   |                         |                                          |
| 695    | CB  | CB  | . LEU LEU LEU A A 92 92 | . 0.4238 0.4097 0.4778 0.0091 -0.0135    |
| 0.0250 | 1   | .   |                         |                                          |
| 696    | CG  | CG  | . LEU LEU LEU A A 92 92 | . 0.4289 0.4475 0.4977 0.0158 -0.0361    |
| 0.0269 | 1   | .   |                         |                                          |
| 697    | CD1 | CD1 | . LEU LEU LEU A A 92 92 | . 0.4330 0.4803 0.4873 -0.0109 -0.0369   |
| 0.0494 | 1   | .   |                         |                                          |
| 698    | CD2 | CD2 | . LEU LEU LEU A A 92 92 | . 0.4109 0.4634 0.5016 0.0292 0.0290 -   |
| 0.0035 | 1   | .   |                         |                                          |
| 699    | C   | C   | . LEU LEU LEU A A 92 92 | . 0.4347 0.4144 0.4494 0.0069 0.0024     |
| 0.0163 | 1   | .   |                         |                                          |
| 700    | O   | O   | . LEU LEU LEU A A 92 92 | . 0.4480 0.4195 0.4495 0.0039 0.0011     |
| 0.0170 | 1   | .   |                         |                                          |
| 701    | N   | N   | . MET MET MET A A 93 93 | . 0.4315 0.4136 0.4461 0.0074 0.0034     |
| 0.0083 | 1   | .   |                         |                                          |
| 702    | CA  | CA  | . MET MET MET A A 93 93 | . 0.4229 0.4122 0.4179 0.0055 0.0010     |
| 0.0015 | 1   | .   |                         |                                          |



|        |     |     |                             |        |        |        |         |         |   |
|--------|-----|-----|-----------------------------|--------|--------|--------|---------|---------|---|
| 733    | O   | O   | . LEU LEU LEU A A 96 96 .   | 0.3772 | 0.4223 | 0.4157 | 0.0150  | 0.0044  | - |
| 0.0007 | 1   | .   |                             |        |        |        |         |         |   |
| 734    | N   | N   | . ASP ASP ASP A A 97 97 .   | 0.4088 | 0.4252 | 0.4386 | -0.0015 | -0.0083 |   |
| 0.0001 | 1   | .   |                             |        |        |        |         |         |   |
| 735    | CA  | CA  | . ASP ASP ASP A A 97 97 .   | 0.4253 | 0.4416 | 0.4470 | 0.0068  | -0.0022 |   |
| 0.0066 | 1   | .   |                             |        |        |        |         |         |   |
| 736    | CB  | CB  | . ASP ASP ASP A A 97 97 .   | 0.4168 | 0.4404 | 0.4523 | -0.0063 | -0.0070 |   |
| 0.0037 | 1   | .   |                             |        |        |        |         |         |   |
| 737    | CG  | CG  | . ASP ASP ASP A A 97 97 .   | 0.4416 | 0.4693 | 0.4740 | -0.0164 | -0.0091 |   |
| 0.0126 | 1   | .   |                             |        |        |        |         |         |   |
| 738    | OD1 | OD1 | . ASP ASP ASP A A 97 97 .   | 0.4679 | 0.5079 | 0.5107 | -0.0355 | -0.0224 |   |
| 0.0228 | 1   | .   |                             |        |        |        |         |         |   |
| 739    | OD2 | OD2 | . ASP ASP ASP A A 97 97 .   | 0.4611 | 0.4501 | 0.4482 | -0.0559 | -0.0270 |   |
| 0.0259 | 1   | .   |                             |        |        |        |         |         |   |
| 740    | C   | C   | . ASP ASP ASP A A 97 97 .   | 0.4316 | 0.4437 | 0.4527 | 0.0138  | -0.0030 |   |
| 0.0092 | 1   | .   |                             |        |        |        |         |         |   |
| 741    | O   | O   | . ASP ASP ASP A A 97 97 .   | 0.4631 | 0.4235 | 0.4410 | 0.0305  | -0.0016 |   |
| 0.0092 | 1   | .   |                             |        |        |        |         |         |   |
| 742    | N   | N   | . GLY GLY GLY A A 98 98 .   | 0.4291 | 0.4506 | 0.4455 | 0.0138  | -0.0024 |   |
| 0.0096 | 1   | .   |                             |        |        |        |         |         |   |
| 743    | CA  | CA  | . GLY GLY GLY A A 98 98 .   | 0.4322 | 0.4704 | 0.4699 | 0.0118  | -0.0123 |   |
| 0.0108 | 1   | .   |                             |        |        |        |         |         |   |
| 744    | C   | C   | . GLY GLY GLY A A 98 98 .   | 0.4548 | 0.4793 | 0.4838 | 0.0053  | -0.0217 |   |
| 0.0108 | 1   | .   |                             |        |        |        |         |         |   |
| 745    | O   | O   | . GLY GLY GLY A A 98 98 .   | 0.4430 | 0.4806 | 0.5016 | 0.0004  | -0.0305 |   |
| 0.0078 | 1   | .   |                             |        |        |        |         |         |   |
| 746    | N   | N   | . THR THR THR A A 99 99 .   | 0.4677 | 0.4662 | 0.4804 | 0.0054  | -0.0226 |   |
| 0.0117 | 1   | .   |                             |        |        |        |         |         |   |
| 747    | CA  | CA  | . THR THR THR A A 99 99 .   | 0.4911 | 0.4752 | 0.4858 | 0.0110  | -0.0150 |   |
| 0.0066 | 1   | .   |                             |        |        |        |         |         |   |
| 748    | CB  | CB  | . THR THR THR A A 99 99 .   | 0.5022 | 0.4711 | 0.5025 | 0.0172  | -0.0136 |   |
| 0.0031 | 1   | .   |                             |        |        |        |         |         |   |
| 749    | OG1 | OG1 | . THR THR THR A A 99 99 .   | 0.5155 | 0.4449 | 0.5112 | 0.0435  | -0.0269 | - |
| 0.0004 | 1   | .   |                             |        |        |        |         |         |   |
| 750    | CG2 | CG2 | . THR THR THR A A 99 99 .   | 0.4971 | 0.5042 | 0.4975 | 0.0250  | -0.0320 | - |
| 0.0005 | 1   | .   |                             |        |        |        |         |         |   |
| 751    | C   | C   | . THR THR THR A A 99 99 .   | 0.5012 | 0.4787 | 0.4993 | 0.0025  | -0.0127 |   |
| 0.0077 | 1   | .   |                             |        |        |        |         |         |   |
| 752    | O   | O   | . THR THR THR A A 99 99 .   | 0.4876 | 0.4712 | 0.4907 | 0.0074  | -0.0218 | - |
| 0.0017 | 1   | .   |                             |        |        |        |         |         |   |
| 753    | N   | N   | . GLU GLU GLU A A 100 100 . | 0.5081 | 0.4962 | 0.5116 | 0.0066  | -0.0175 |   |
| 0.0101 | 1   | .   |                             |        |        |        |         |         |   |
| 754    | CA  | CA  | . GLU GLU GLU A A 100 100 . | 0.5389 | 0.5221 | 0.5287 | 0.0058  | -0.0155 |   |
| 0.0127 | 1   | .   |                             |        |        |        |         |         |   |
| 755    | CB  | CB  | . GLU GLU GLU A A 100 100 . | 0.5722 | 0.5563 | 0.5560 | 0.0041  | -0.0216 |   |
| 0.0157 | 1   | .   |                             |        |        |        |         |         |   |
| 756    | CG  | CG  | . GLU GLU GLU A A 100 100 . | 0.6637 | 0.5890 | 0.6063 | 0.0172  | -0.0275 |   |
| 0.0040 | 1   | .   |                             |        |        |        |         |         |   |
| 757    | CD  | CD  | . GLU GLU GLU A A 100 100 . | 0.7276 | 0.7166 | 0.6777 | 0.0399  | -0.0026 |   |
| 0.0344 | 1   | .   |                             |        |        |        |         |         |   |
| 758    | OE1 | OE1 | . GLU GLU GLU A A 100 100 . | 0.8177 | 0.7851 | 0.7537 | 0.0626  | -0.0381 |   |
| 0.0594 | 1   | .   |                             |        |        |        |         |         |   |
| 759    | OE2 | OE2 | . GLU GLU GLU A A 100 100 . | 0.7278 | 0.7585 | 0.7054 | 0.0734  | -0.0218 |   |
| 0.0468 | 1   | .   |                             |        |        |        |         |         |   |
| 760    | C   | C   | . GLU GLU GLU A A 100 100 . | 0.5213 | 0.5194 | 0.5191 | 0.0065  | -0.0083 |   |
| 0.0063 | 1   | .   |                             |        |        |        |         |         |   |
| 761    | O   | O   | . GLU GLU GLU A A 100 100 . | 0.5578 | 0.5243 | 0.5073 | 0.0133  | -0.0074 |   |
| 0.0033 | 1   | .   |                             |        |        |        |         |         |   |
| 762    | N   | N   | . ASN ASN ASN A A 101 101 . | 0.4879 | 0.4999 | 0.4958 | -0.0025 | -0.0108 |   |
| 0.0163 | 1   | .   |                             |        |        |        |         |         |   |

|        |     |     |                             |        |        |        |         |         |   |
|--------|-----|-----|-----------------------------|--------|--------|--------|---------|---------|---|
| 763    | CA  | CA  | . ASN ASN ASN A A 101 101 . | 0.4686 | 0.4922 | 0.4863 | -0.0110 | -0.0074 |   |
| 0.0131 | 1   | .   |                             |        |        |        |         |         |   |
| 764    | CB  | CB  | . ASN ASN ASN A A 101 101 . | 0.4741 | 0.5092 | 0.5227 | -0.0064 | 0.0010  |   |
| 0.0220 | 1   | .   |                             |        |        |        |         |         |   |
| 765    | CG  | CG  | . ASN ASN ASN A A 101 101 . | 0.5477 | 0.5805 | 0.5899 | -0.0159 | 0.0045  |   |
| 0.0099 | 1   | .   |                             |        |        |        |         |         |   |
| 766    | OD1 | OD1 | . ASN ASN ASN A A 101 101 . | 0.6949 | 0.6542 | 0.6806 | -0.0683 | 0.0265  |   |
| 0.0698 | 1   | .   |                             |        |        |        |         |         |   |
| 767    | ND2 | ND2 | . ASN ASN ASN A A 101 101 . | 0.5463 | 0.6569 | 0.6773 | -0.0566 | -0.0198 |   |
| 0.0173 | 1   | .   |                             |        |        |        |         |         |   |
| 768    | C   | C   | . ASN ASN ASN A A 101 101 . | 0.4288 | 0.4562 | 0.4569 | -0.0100 | -0.0079 |   |
| 0.0253 | 1   | .   |                             |        |        |        |         |         |   |
| 769    | O   | O   | . ASN ASN ASN A A 101 101 . | 0.3837 | 0.4490 | 0.4173 | -0.0176 | -0.0146 |   |
| 0.0238 | 1   | .   |                             |        |        |        |         |         |   |
| 770    | N   | N   | . LYS LYS LYS A A 102 102 . | 0.4385 | 0.4409 | 0.4370 | -0.0009 | -0.0196 |   |
| 0.0240 | 1   | .   |                             |        |        |        |         |         |   |
| 771    | CA  | CA  | . LYS LYS LYS A A 102 102 . | 0.4165 | 0.4309 | 0.4229 | -0.0015 | -0.0147 |   |
| 0.0112 | 1   | .   |                             |        |        |        |         |         |   |
| 772    | CB  | CB  | . LYS LYS LYS A A 102 102 . | 0.3999 | 0.4477 | 0.4256 | 0.0003  | -0.0267 | - |
| 0.0019 | 1   | .   |                             |        |        |        |         |         |   |
| 773    | CG  | CG  | . LYS LYS LYS A A 102 102 . | 0.4327 | 0.4799 | 0.4018 | -0.0056 | -0.0035 |   |
| 0.0237 | 1   | .   |                             |        |        |        |         |         |   |
| 774    | CD  | CD  | . LYS LYS LYS A A 102 102 . | 0.5135 | 0.5113 | 0.4241 | 0.0637  | -0.0061 |   |
| 0.0105 | 1   | .   |                             |        |        |        |         |         |   |
| 775    | CE  | CE  | . LYS LYS LYS A A 102 102 . | 0.5932 | 0.5025 | 0.4813 | 0.0848  | -0.0261 | - |
| 0.0144 | 1   | .   |                             |        |        |        |         |         |   |
| 776    | NZ  | NZ  | . LYS LYS LYS A A 102 102 . | 0.6436 | 0.4962 | 0.4238 | 0.0960  | -0.0033 | - |
| 0.0481 | 1   | .   |                             |        |        |        |         |         |   |
| 777    | C   | C   | . LYS LYS LYS A A 102 102 . | 0.4200 | 0.4355 | 0.4223 | 0.0044  | -0.0200 |   |
| 0.0118 | 1   | .   |                             |        |        |        |         |         |   |
| 778    | O   | O   | . LYS LYS LYS A A 102 102 . | 0.4042 | 0.4261 | 0.4122 | 0.0157  | -0.0308 |   |
| 0.0227 | 1   | .   |                             |        |        |        |         |         |   |
| 779    | N   | N   | . SER SER SER A A 103 103 . | 0.4094 | 0.4301 | 0.4148 | 0.0127  | -0.0121 |   |
| 0.0064 | 1   | .   |                             |        |        |        |         |         |   |
| 780    | CA  | CA  | . SER SER SER A A 103 103 . | 0.4064 | 0.4274 | 0.4308 | 0.0011  | -0.0079 |   |
| 0.0115 | 1   | .   |                             |        |        |        |         |         |   |
| 781    | CB  | CB  | . SER SER SER A A 103 103 . | 0.4116 | 0.4201 | 0.4406 | 0.0014  | -0.0060 |   |
| 0.0159 | 1   | .   |                             |        |        |        |         |         |   |
| 782    | OG  | OG  | . SER SER SER A A 103 103 . | 0.4114 | 0.4106 | 0.4938 | 0.0022  | -0.0253 |   |
| 0.0134 | 1   | .   |                             |        |        |        |         |         |   |
| 783    | C   | C   | . SER SER SER A A 103 103 . | 0.4040 | 0.4143 | 0.4207 | -0.0048 | 0.0051  |   |
| 0.0008 | 1   | .   |                             |        |        |        |         |         |   |
| 784    | O   | O   | . SER SER SER A A 103 103 . | 0.4029 | 0.4258 | 0.4438 | -0.0033 | 0.0186  | - |
| 0.0142 | 1   | .   |                             |        |        |        |         |         |   |
| 785    | N   | N   | . LYS LYS LYS A A 104 104 . | 0.4080 | 0.4073 | 0.4060 | -0.0066 | -0.0016 |   |
| 0.0048 | 1   | .   |                             |        |        |        |         |         |   |
| 786    | CA  | CA  | . LYS LYS LYS A A 104 104 . | 0.3926 | 0.3952 | 0.3886 | -0.0002 | -0.0024 | - |
| 0.0041 | 1   | .   |                             |        |        |        |         |         |   |
| 787    | CB  | CB  | . LYS LYS LYS A A 104 104 . | 0.4045 | 0.3865 | 0.3774 | -0.0045 | -0.0093 | - |
| 0.0006 | 1   | .   |                             |        |        |        |         |         |   |
| 788    | CG  | CG  | . LYS LYS LYS A A 104 104 . | 0.4315 | 0.3824 | 0.3753 | 0.0006  | -0.0061 | - |
| 0.0101 | 1   | .   |                             |        |        |        |         |         |   |
| 789    | CD  | CD  | . LYS LYS LYS A A 104 104 . | 0.4924 | 0.4066 | 0.3874 | -0.0107 | -0.0557 |   |
| 0.0087 | 1   | .   |                             |        |        |        |         |         |   |
| 790    | CE  | CE  | . LYS LYS LYS A A 104 104 . | 0.5586 | 0.3412 | 0.4101 | -0.0041 | 0.0008  |   |
| 0.0304 | 1   | .   |                             |        |        |        |         |         |   |
| 791    | NZ  | NZ  | . LYS LYS LYS A A 104 104 . | 0.5153 | 0.3852 | 0.5217 | -0.0544 | -0.0011 |   |
| 0.0357 | 1   | .   |                             |        |        |        |         |         |   |
| 792    | C   | C   | . LYS LYS LYS A A 104 104 . | 0.3761 | 0.3833 | 0.3834 | 0.0068  | -0.0019 |   |
| 0.0009 | 1   | .   |                             |        |        |        |         |         |   |





|        |     |     |                   |         |                                         |
|--------|-----|-----|-------------------|---------|-----------------------------------------|
| 823    | CA  | CA  | . ALA ALA ALA A A | 109 109 | . 0.3671 0.3713 0.3530 -0.0006 -0.0036  |
| 0.0007 | 1   | .   |                   |         |                                         |
| 824    | CB  | CB  | . ALA ALA ALA A A | 109 109 | . 0.3801 0.3784 0.3416 -0.0074 -0.0066  |
| 0.0026 | 1   | .   |                   |         |                                         |
| 825    | C   | C   | . ALA ALA ALA A A | 109 109 | . 0.3674 0.3752 0.3570 0.0089 -0.0063 - |
| 0.0004 | 1   | .   |                   |         |                                         |
| 826    | O   | O   | . ALA ALA ALA A A | 109 109 | . 0.3589 0.3564 0.3685 0.0237 -0.0096 - |
| 0.0030 | 1   | .   |                   |         |                                         |
| 827    | N   | N   | . ILE ILE ILE A A | 110 110 | . 0.3803 0.3800 0.3449 -0.0020 0.0005   |
| 0.0030 | 1   | .   |                   |         |                                         |
| 828    | CA  | CA  | . ILE ILE ILE A A | 110 110 | . 0.3869 0.3729 0.3502 0.0025 -0.0031   |
| 0.0067 | 1   | .   |                   |         |                                         |
| 829    | CB  | CB  | . ILE ILE ILE A A | 110 110 | . 0.3998 0.3809 0.3623 0.0113 -0.0002   |
| 0.0088 | 1   | .   |                   |         |                                         |
| 830    | CG1 | CG1 | . ILE ILE ILE A A | 110 110 | . 0.3774 0.3741 0.3756 0.0061 -0.0031   |
| 0.0135 | 1   | .   |                   |         |                                         |
| 831    | CD1 | CD1 | . ILE ILE ILE A A | 110 110 | . 0.3959 0.3650 0.3948 0.0034 -0.0195   |
| 0.0658 | 1   | .   |                   |         |                                         |
| 832    | CG2 | CG2 | . ILE ILE ILE A A | 110 110 | . 0.4192 0.3510 0.3503 -0.0078 0.0224 - |
| 0.0088 | 1   | .   |                   |         |                                         |
| 833    | C   | C   | . ILE ILE ILE A A | 110 110 | . 0.3562 0.3478 0.3394 0.0033 -0.0040   |
| 0.0144 | 1   | .   |                   |         |                                         |
| 834    | O   | O   | . ILE ILE ILE A A | 110 110 | . 0.3546 0.3697 0.3476 -0.0218 -0.0157  |
| 0.0270 | 1   | .   |                   |         |                                         |
| 835    | N   | N   | . LEU LEU LEU A A | 111 111 | . 0.3550 0.3386 0.3304 0.0022 0.0020    |
| 0.0178 | 1   | .   |                   |         |                                         |
| 836    | CA  | CA  | . LEU LEU LEU A A | 111 111 | . 0.3488 0.3347 0.3278 0.0058 0.0085    |
| 0.0026 | 1   | .   |                   |         |                                         |
| 837    | CB  | CB  | . LEU LEU LEU A A | 111 111 | . 0.3362 0.3090 0.3290 0.0008 0.0226 -  |
| 0.0016 | 1   | .   |                   |         |                                         |
| 838    | CG  | CG  | . LEU LEU LEU A A | 111 111 | . 0.3510 0.3446 0.3337 0.0028 0.0355    |
| 0.0025 | 1   | .   |                   |         |                                         |
| 839    | CD1 | CD1 | . LEU LEU LEU A A | 111 111 | . 0.2824 0.2713 0.3226 -0.0026 0.0164 - |
| 0.0094 | 1   | .   |                   |         |                                         |
| 840    | CD2 | CD2 | . LEU LEU LEU A A | 111 111 | . 0.3363 0.3948 0.3058 0.0128 0.0781 -  |
| 0.0027 | 1   | .   |                   |         |                                         |
| 841    | C   | C   | . LEU LEU LEU A A | 111 111 | . 0.3497 0.3190 0.3325 0.0053 0.0106    |
| 0.0061 | 1   | .   |                   |         |                                         |
| 842    | O   | O   | . LEU LEU LEU A A | 111 111 | . 0.3443 0.3350 0.3396 0.0115 0.0255    |
| 0.0088 | 1   | .   |                   |         |                                         |
| 843    | N   | N   | . GLY GLY GLY A A | 112 112 | . 0.3559 0.3016 0.3204 -0.0162 0.0017   |
| 0.0194 | 1   | .   |                   |         |                                         |
| 844    | CA  | CA  | . GLY GLY GLY A A | 112 112 | . 0.3371 0.3163 0.3203 -0.0117 -0.0027  |
| 0.0183 | 1   | .   |                   |         |                                         |
| 845    | C   | C   | . GLY GLY GLY A A | 112 112 | . 0.3399 0.3263 0.3282 -0.0044 0.0044   |
| 0.0153 | 1   | .   |                   |         |                                         |
| 846    | O   | O   | . GLY GLY GLY A A | 112 112 | . 0.3536 0.3253 0.3529 -0.0008 0.0085   |
| 0.0009 | 1   | .   |                   |         |                                         |
| 847    | N   | N   | . VAL VAL VAL A A | 113 113 | . 0.3389 0.3425 0.3200 -0.0191 -0.0005  |
| 0.0066 | 1   | .   |                   |         |                                         |
| 848    | CA  | CA  | . VAL VAL VAL A A | 113 113 | . 0.3150 0.3333 0.3273 -0.0134 -0.0052  |
| 0.0103 | 1   | .   |                   |         |                                         |
| 849    | CB  | CB  | . VAL VAL VAL A A | 113 113 | . 0.3211 0.3339 0.3313 -0.0064 -0.0024  |
| 0.0062 | 1   | .   |                   |         |                                         |
| 850    | CG1 | CG1 | . VAL VAL VAL A A | 113 113 | . 0.2924 0.3192 0.3390 -0.0089 0.0107 - |
| 0.0012 | 1   | .   |                   |         |                                         |
| 851    | CG2 | CG2 | . VAL VAL VAL A A | 113 113 | . 0.2459 0.2988 0.3195 0.0159 0.0106    |
| 0.0363 | 1   | .   |                   |         |                                         |
| 852    | C   | C   | . VAL VAL VAL A A | 113 113 | . 0.3142 0.3402 0.3335 -0.0044 -0.0013  |
| 0.0052 | 1   | .   |                   |         |                                         |



|        |    |    |                             |        |        |        |         |        |   |
|--------|----|----|-----------------------------|--------|--------|--------|---------|--------|---|
| 883    | SG | SG | . CYS CYS CYS A A 118 118 . | 0.4942 | 0.4014 | 0.4357 | -0.0320 | 0.0666 |   |
| 0.0175 | 1  | .  |                             |        |        |        |         |        |   |
| 884    | C  | C  | . CYS CYS CYS A A 118 118 . | 0.4170 | 0.4091 | 0.4148 | -0.0160 | 0.0219 |   |
| 0.0105 | 1  | .  |                             |        |        |        |         |        |   |
| 885    | O  | O  | . CYS CYS CYS A A 118 118 . | 0.4284 | 0.4135 | 0.4164 | -0.0353 | 0.0386 |   |
| 0.0197 | 1  | .  |                             |        |        |        |         |        |   |
| 886    | N  | N  | . LYS LYS LYS A A 119 119 . | 0.3997 | 0.4089 | 0.4169 | -0.0077 | 0.0216 |   |
| 0.0074 | 1  | .  |                             |        |        |        |         |        |   |
| 887    | CA | CA | . LYS LYS LYS A A 119 119 . | 0.3888 | 0.3988 | 0.4179 | -0.0151 | 0.0145 | - |
| 0.0039 | 1  | .  |                             |        |        |        |         |        |   |
| 888    | CB | CB | . LYS LYS LYS A A 119 119 . | 0.3686 | 0.3692 | 0.4053 | -0.0194 | 0.0228 | - |
| 0.0111 | 1  | .  |                             |        |        |        |         |        |   |
| 889    | CG | CG | . LYS LYS LYS A A 119 119 . | 0.3871 | 0.4130 | 0.4177 | -0.0244 | 0.0318 |   |
| 0.0001 | 1  | .  |                             |        |        |        |         |        |   |
| 890    | CD | CD | . LYS LYS LYS A A 119 119 . | 0.3296 | 0.4466 | 0.4281 | -0.0850 | 0.0961 | - |
| 0.0332 | 1  | .  |                             |        |        |        |         |        |   |
| 891    | CE | CE | . LYS LYS LYS A A 119 119 . | 0.3621 | 0.5310 | 0.4221 | -0.0813 | 0.0931 |   |
| 0.0273 | 1  | .  |                             |        |        |        |         |        |   |
| 892    | NZ | NZ | . LYS LYS LYS A A 119 119 . | 0.2349 | 0.5010 | 0.4538 | -0.0577 | 0.1330 |   |
| 0.0075 | 1  | .  |                             |        |        |        |         |        |   |
| 893    | C  | C  | . LYS LYS LYS A A 119 119 . | 0.3866 | 0.3957 | 0.4291 | -0.0157 | 0.0163 | - |
| 0.0111 | 1  | .  |                             |        |        |        |         |        |   |
| 894    | O  | O  | . LYS LYS LYS A A 119 119 . | 0.4063 | 0.3946 | 0.4459 | -0.0230 | 0.0309 | - |
| 0.0200 | 1  | .  |                             |        |        |        |         |        |   |
| 895    | N  | N  | . ALA ALA ALA A A 120 120 . | 0.3828 | 0.3841 | 0.4172 | -0.0137 | 0.0207 | - |
| 0.0082 | 1  | .  |                             |        |        |        |         |        |   |
| 896    | CA | CA | . ALA ALA ALA A A 120 120 . | 0.3692 | 0.3788 | 0.3991 | -0.0143 | 0.0125 | - |
| 0.0096 | 1  | .  |                             |        |        |        |         |        |   |
| 897    | CB | CB | . ALA ALA ALA A A 120 120 . | 0.3433 | 0.3778 | 0.3792 | -0.0129 | 0.0250 | - |
| 0.0098 | 1  | .  |                             |        |        |        |         |        |   |
| 898    | C  | C  | . ALA ALA ALA A A 120 120 . | 0.3798 | 0.3863 | 0.4143 | -0.0128 | 0.0130 | - |
| 0.0062 | 1  | .  |                             |        |        |        |         |        |   |
| 899    | O  | O  | . ALA ALA ALA A A 120 120 . | 0.3564 | 0.3717 | 0.4304 | -0.0002 | 0.0147 | - |
| 0.0095 | 1  | .  |                             |        |        |        |         |        |   |
| 900    | N  | N  | . GLY GLY GLY A A 121 121 . | 0.3984 | 0.4092 | 0.4155 | -0.0095 | 0.0052 |   |
| 0.0086 | 1  | .  |                             |        |        |        |         |        |   |
| 901    | CA | CA | . GLY GLY GLY A A 121 121 . | 0.4291 | 0.4301 | 0.4476 | -0.0121 | 0.0149 |   |
| 0.0103 | 1  | .  |                             |        |        |        |         |        |   |
| 902    | C  | C  | . GLY GLY GLY A A 121 121 . | 0.4409 | 0.4481 | 0.4683 | -0.0098 | 0.0184 |   |
| 0.0085 | 1  | .  |                             |        |        |        |         |        |   |
| 903    | O  | O  | . GLY GLY GLY A A 121 121 . | 0.4634 | 0.4698 | 0.4647 | -0.0195 | 0.0351 |   |
| 0.0163 | 1  | .  |                             |        |        |        |         |        |   |
| 904    | N  | N  | . ALA ALA ALA A A 122 122 . | 0.4482 | 0.4544 | 0.4837 | -0.0080 | 0.0174 |   |
| 0.0131 | 1  | .  |                             |        |        |        |         |        |   |
| 905    | CA | CA | . ALA ALA ALA A A 122 122 . | 0.4492 | 0.4536 | 0.4799 | 0.0017  | 0.0188 |   |
| 0.0003 | 1  | .  |                             |        |        |        |         |        |   |
| 906    | CB | CB | . ALA ALA ALA A A 122 122 . | 0.4233 | 0.4326 | 0.4749 | 0.0033  | 0.0129 | - |
| 0.0075 | 1  | .  |                             |        |        |        |         |        |   |
| 907    | C  | C  | . ALA ALA ALA A A 122 122 . | 0.4548 | 0.4674 | 0.4917 | 0.0002  | 0.0155 | - |
| 0.0014 | 1  | .  |                             |        |        |        |         |        |   |
| 908    | O  | O  | . ALA ALA ALA A A 122 122 . | 0.4680 | 0.4669 | 0.5068 | -0.0043 | 0.0224 | - |
| 0.0048 | 1  | .  |                             |        |        |        |         |        |   |
| 909    | N  | N  | . ALA ALA ALA A A 123 123 . | 0.4697 | 0.4776 | 0.5029 | 0.0006  | 0.0139 | - |
| 0.0018 | 1  | .  |                             |        |        |        |         |        |   |
| 910    | CA | CA | . ALA ALA ALA A A 123 123 . | 0.4961 | 0.4986 | 0.5168 | -0.0023 | 0.0100 |   |
| 0.0057 | 1  | .  |                             |        |        |        |         |        |   |
| 911    | CB | CB | . ALA ALA ALA A A 123 123 . | 0.4941 | 0.4894 | 0.5156 | 0.0011  | 0.0100 | - |
| 0.0029 | 1  | .  |                             |        |        |        |         |        |   |
| 912    | C  | C  | . ALA ALA ALA A A 123 123 . | 0.5211 | 0.5190 | 0.5396 | -0.0018 | 0.0075 |   |
| 0.0058 | 1  | .  |                             |        |        |        |         |        |   |



|        |     |     |                             |        |        |        |         |         |   |
|--------|-----|-----|-----------------------------|--------|--------|--------|---------|---------|---|
| 943    | N   | N   | . LEU LEU LEU A A 127 127 . | 0.5278 | 0.5403 | 0.5358 | 0.0031  | 0.0102  | - |
| 0.0131 | 1   | .   |                             |        |        |        |         |         |   |
| 944    | CA  | CA  | . LEU LEU LEU A A 127 127 . | 0.5107 | 0.5125 | 0.5184 | 0.0003  | 0.0154  | - |
| 0.0122 | 1   | .   |                             |        |        |        |         |         |   |
| 945    | CB  | CB  | . LEU LEU LEU A A 127 127 . | 0.5043 | 0.5096 | 0.5131 | 0.0079  | 0.0127  | - |
| 0.0245 | 1   | .   |                             |        |        |        |         |         |   |
| 946    | CG  | CG  | . LEU LEU LEU A A 127 127 . | 0.5111 | 0.5162 | 0.5306 | 0.0015  | 0.0133  | - |
| 0.0116 | 1   | .   |                             |        |        |        |         |         |   |
| 947    | CD1 | CD1 | . LEU LEU LEU A A 127 127 . | 0.5826 | 0.5013 | 0.5422 | 0.0311  | 0.0190  | - |
| 0.0051 | 1   | .   |                             |        |        |        |         |         |   |
| 948    | CD2 | CD2 | . LEU LEU LEU A A 127 127 . | 0.5037 | 0.5388 | 0.5393 | 0.0027  | 0.0240  | - |
| 0.0169 | 1   | .   |                             |        |        |        |         |         |   |
| 949    | C   | C   | . LEU LEU LEU A A 127 127 . | 0.4803 | 0.4915 | 0.5144 | -0.0059 | 0.0139  | - |
| 0.0148 | 1   | .   |                             |        |        |        |         |         |   |
| 950    | O   | O   | . LEU LEU LEU A A 127 127 . | 0.4673 | 0.5003 | 0.5325 | -0.0245 | 0.0189  | - |
| 0.0079 | 1   | .   |                             |        |        |        |         |         |   |
| 951    | N   | N   | . PRO PRO PRO A A 128 128 . | 0.4609 | 0.4834 | 0.5000 | -0.0058 | 0.0204  | - |
| 0.0097 | 1   | .   |                             |        |        |        |         |         |   |
| 952    | CA  | CA  | . PRO PRO PRO A A 128 128 . | 0.4518 | 0.4631 | 0.4823 | 0.0029  | 0.0124  | - |
| 0.0053 | 1   | .   |                             |        |        |        |         |         |   |
| 953    | CB  | CB  | . PRO PRO PRO A A 128 128 . | 0.4619 | 0.4625 | 0.4914 | -0.0060 | 0.0059  | - |
| 0.0133 | 1   | .   |                             |        |        |        |         |         |   |
| 954    | CG  | CG  | . PRO PRO PRO A A 128 128 . | 0.4444 | 0.4682 | 0.4840 | -0.0087 | 0.0303  | - |
| 0.0129 | 1   | .   |                             |        |        |        |         |         |   |
| 955    | CD  | CD  | . PRO PRO PRO A A 128 128 . | 0.4729 | 0.4776 | 0.4927 | -0.0027 | 0.0171  | - |
| 0.0163 | 1   | .   |                             |        |        |        |         |         |   |
| 956    | C   | C   | . PRO PRO PRO A A 128 128 . | 0.4172 | 0.4446 | 0.4497 | 0.0081  | 0.0220  | - |
| 0.0020 | 1   | .   |                             |        |        |        |         |         |   |
| 957    | O   | O   | . PRO PRO PRO A A 128 128 . | 0.3860 | 0.4440 | 0.4038 | 0.0249  | 0.0335  | - |
| 0.0003 | 1   | .   |                             |        |        |        |         |         |   |
| 958    | N   | N   | . LEU LEU LEU A A 129 129 . | 0.4099 | 0.4214 | 0.4190 | 0.0102  | 0.0201  | - |
| 0.0117 | 1   | .   |                             |        |        |        |         |         |   |
| 959    | CA  | CA  | . LEU LEU LEU A A 129 129 . | 0.3865 | 0.4099 | 0.4062 | -0.0016 | 0.0218  | - |
| 0.0134 | 1   | .   |                             |        |        |        |         |         |   |
| 960    | CB  | CB  | . LEU LEU LEU A A 129 129 . | 0.3995 | 0.4061 | 0.4026 | 0.0060  | 0.0206  | - |
| 0.0249 | 1   | .   |                             |        |        |        |         |         |   |
| 961    | CG  | CG  | . LEU LEU LEU A A 129 129 . | 0.3792 | 0.3914 | 0.4059 | -0.0270 | 0.0154  | - |
| 0.0198 | 1   | .   |                             |        |        |        |         |         |   |
| 962    | CD1 | CD1 | . LEU LEU LEU A A 129 129 . | 0.4211 | 0.4197 | 0.4071 | -0.0542 | -0.0025 | - |
| 0.0416 | 1   | .   |                             |        |        |        |         |         |   |
| 963    | CD2 | CD2 | . LEU LEU LEU A A 129 129 . | 0.3881 | 0.3413 | 0.3762 | -0.0908 | -0.0114 | - |
| 0.0405 | 1   | .   |                             |        |        |        |         |         |   |
| 964    | C   | C   | . LEU LEU LEU A A 129 129 . | 0.3694 | 0.4024 | 0.3948 | -0.0013 | 0.0255  | - |
| 0.0087 | 1   | .   |                             |        |        |        |         |         |   |
| 965    | O   | O   | . LEU LEU LEU A A 129 129 . | 0.3289 | 0.4160 | 0.3544 | -0.0205 | 0.0498  | - |
| 0.0166 | 1   | .   |                             |        |        |        |         |         |   |
| 966    | N   | N   | . TYR TYR TYR A A 130 130 . | 0.3748 | 0.4160 | 0.4002 | 0.0051  | 0.0257  | - |
| 0.0022 | 1   | .   |                             |        |        |        |         |         |   |
| 967    | CA  | CA  | . TYR TYR TYR A A 130 130 . | 0.3784 | 0.4171 | 0.3854 | 0.0101  | 0.0226  | - |
| 0.0053 | 1   | .   |                             |        |        |        |         |         |   |
| 968    | CB  | CB  | . TYR TYR TYR A A 130 130 . | 0.4013 | 0.4209 | 0.3837 | 0.0106  | 0.0235  | - |
| 0.0006 | 1   | .   |                             |        |        |        |         |         |   |
| 969    | CG  | CG  | . TYR TYR TYR A A 130 130 . | 0.3887 | 0.4473 | 0.4114 | 0.0104  | 0.0235  | - |
| 0.0045 | 1   | .   |                             |        |        |        |         |         |   |
| 970    | CD1 | CD1 | . TYR TYR TYR A A 130 130 . | 0.4491 | 0.4773 | 0.4512 | 0.0323  | 0.0222  | - |
| 0.0100 | 1   | .   |                             |        |        |        |         |         |   |
| 971    | CE1 | CE1 | . TYR TYR TYR A A 130 130 . | 0.4925 | 0.4022 | 0.4641 | 0.0401  | 0.0086  | - |
| 0.0462 | 1   | .   |                             |        |        |        |         |         |   |
| 972    | CZ  | CZ  | . TYR TYR TYR A A 130 130 . | 0.4929 | 0.4344 | 0.5143 | 0.0370  | 0.0001  | - |
| 0.0365 | 1   | .   |                             |        |        |        |         |         |   |



|        |     |     |                             |        |        |        |         |         |   |
|--------|-----|-----|-----------------------------|--------|--------|--------|---------|---------|---|
| 1003   | CD1 | CD1 | . ILE ILE ILE A A 133 133 . | 0.3989 | 0.3005 | 0.3798 | -0.0704 | 0.0024  |   |
| 0.0389 | 1   | .   |                             |        |        |        |         |         |   |
| 1004   | CG2 | CG2 | . ILE ILE ILE A A 133 133 . | 0.2551 | 0.3347 | 0.2947 | -0.0625 | 0.0412  |   |
| 0.0074 | 1   | .   |                             |        |        |        |         |         |   |
| 1005   | C   | C   | . ILE ILE ILE A A 133 133 . | 0.3870 | 0.4013 | 0.3918 | -0.0098 | 0.0334  |   |
| 0.0239 | 1   | .   |                             |        |        |        |         |         |   |
| 1006   | O   | O   | . ILE ILE ILE A A 133 133 . | 0.3688 | 0.4049 | 0.3920 | -0.0085 | 0.0363  |   |
| 0.0405 | 1   | .   |                             |        |        |        |         |         |   |
| 1007   | N   | N   | . ALA ALA ALA A A 134 134 . | 0.4476 | 0.4234 | 0.4242 | -0.0145 | 0.0319  |   |
| 0.0159 | 1   | .   |                             |        |        |        |         |         |   |
| 1008   | CA  | CA  | . ALA ALA ALA A A 134 134 . | 0.4755 | 0.4577 | 0.4486 | -0.0085 | 0.0208  |   |
| 0.0054 | 1   | .   |                             |        |        |        |         |         |   |
| 1009   | CB  | CB  | . ALA ALA ALA A A 134 134 . | 0.4942 | 0.4627 | 0.4527 | -0.0014 | 0.0337  |   |
| 0.0065 | 1   | .   |                             |        |        |        |         |         |   |
| 1010   | C   | C   | . ALA ALA ALA A A 134 134 . | 0.4912 | 0.4885 | 0.4584 | 0.0002  | 0.0141  |   |
| 0.0063 | 1   | .   |                             |        |        |        |         |         |   |
| 1011   | O   | O   | . ALA ALA ALA A A 134 134 . | 0.4943 | 0.5193 | 0.4858 | 0.0190  | 0.0095  |   |
| 0.0064 | 1   | .   |                             |        |        |        |         |         |   |
| 1012   | N   | N   | . GLN GLN GLN A A 135 135 . | 0.4723 | 0.4962 | 0.4726 | -0.0048 | 0.0086  |   |
| 0.0074 | 1   | .   |                             |        |        |        |         |         |   |
| 1013   | CA  | CA  | . GLN GLN GLN A A 135 135 . | 0.4873 | 0.4994 | 0.4663 | 0.0001  | 0.0099  |   |
| 0.0133 | 1   | .   |                             |        |        |        |         |         |   |
| 1014   | CB  | CB  | . GLN GLN GLN A A 135 135 . | 0.4515 | 0.4909 | 0.4633 | -0.0017 | 0.0079  |   |
| 0.0210 | 1   | .   |                             |        |        |        |         |         |   |
| 1015   | CG  | CG  | . GLN GLN GLN A A 135 135 . | 0.4779 | 0.5174 | 0.4558 | -0.0001 | 0.0166  |   |
| 0.0133 | 1   | .   |                             |        |        |        |         |         |   |
| 1016   | CD  | CD  | . GLN GLN GLN A A 135 135 . | 0.4681 | 0.5222 | 0.5063 | 0.0226  | 0.0394  |   |
| 0.0146 | 1   | .   |                             |        |        |        |         |         |   |
| 1017   | OE1 | OE1 | . GLN GLN GLN A A 135 135 . | 0.5061 | 0.5865 | 0.5357 | 0.0480  | 0.1124  | - |
| 0.0165 | 1   | .   |                             |        |        |        |         |         |   |
| 1018   | NE2 | NE2 | . GLN GLN GLN A A 135 135 . | 0.4276 | 0.4610 | 0.5286 | 0.0062  | 0.0102  |   |
| 0.0402 | 1   | .   |                             |        |        |        |         |         |   |
| 1019   | C   | C   | . GLN GLN GLN A A 135 135 . | 0.4886 | 0.5104 | 0.4738 | 0.0042  | 0.0112  |   |
| 0.0148 | 1   | .   |                             |        |        |        |         |         |   |
| 1020   | O   | O   | . GLN GLN GLN A A 135 135 . | 0.5075 | 0.5234 | 0.4530 | -0.0002 | 0.0082  |   |
| 0.0163 | 1   | .   |                             |        |        |        |         |         |   |
| 1021   | N   | N   | . LEU LEU LEU A A 136 136 . | 0.4933 | 0.5128 | 0.4728 | 0.0000  | 0.0177  |   |
| 0.0082 | 1   | .   |                             |        |        |        |         |         |   |
| 1022   | CA  | CA  | . LEU LEU LEU A A 136 136 . | 0.5089 | 0.5048 | 0.4841 | 0.0009  | 0.0099  |   |
| 0.0028 | 1   | .   |                             |        |        |        |         |         |   |
| 1023   | CB  | CB  | . LEU LEU LEU A A 136 136 . | 0.4996 | 0.5003 | 0.4631 | -0.0046 | 0.0135  | - |
| 0.0051 | 1   | .   |                             |        |        |        |         |         |   |
| 1024   | CG  | CG  | . LEU LEU LEU A A 136 136 . | 0.5204 | 0.5125 | 0.4754 | -0.0166 | 0.0205  | - |
| 0.0071 | 1   | .   |                             |        |        |        |         |         |   |
| 1025   | CD1 | CD1 | . LEU LEU LEU A A 136 136 . | 0.4817 | 0.5430 | 0.4229 | -0.0097 | 0.0238  | - |
| 0.0241 | 1   | .   |                             |        |        |        |         |         |   |
| 1026   | CD2 | CD2 | . LEU LEU LEU A A 136 136 . | 0.4566 | 0.5183 | 0.4464 | -0.0647 | 0.0042  | - |
| 0.0112 | 1   | .   |                             |        |        |        |         |         |   |
| 1027   | C   | C   | . LEU LEU LEU A A 136 136 . | 0.5150 | 0.5098 | 0.4810 | -0.0016 | 0.0060  |   |
| 0.0012 | 1   | .   |                             |        |        |        |         |         |   |
| 1028   | O   | O   | . LEU LEU LEU A A 136 136 . | 0.5291 | 0.5123 | 0.4802 | -0.0083 | 0.0160  |   |
| 0.0046 | 1   | .   |                             |        |        |        |         |         |   |
| 1029   | N   | N   | . ALA ALA ALA A A 137 137 . | 0.5143 | 0.5093 | 0.4860 | -0.0038 | 0.0059  |   |
| 0.0035 | 1   | .   |                             |        |        |        |         |         |   |
| 1030   | CA  | CA  | . ALA ALA ALA A A 137 137 . | 0.5368 | 0.5285 | 0.5078 | -0.0066 | 0.0002  |   |
| 0.0039 | 1   | .   |                             |        |        |        |         |         |   |
| 1031   | CB  | CB  | . ALA ALA ALA A A 137 137 . | 0.5190 | 0.5299 | 0.4975 | -0.0102 | -0.0029 |   |
| 0.0006 | 1   | .   |                             |        |        |        |         |         |   |
| 1032   | C   | C   | . ALA ALA ALA A A 137 137 . | 0.5512 | 0.5417 | 0.5260 | -0.0036 | -0.0009 |   |
| 0.0032 | 1   | .   |                             |        |        |        |         |         |   |





|        |     |     |                             |        |        |        |         |         |   |
|--------|-----|-----|-----------------------------|--------|--------|--------|---------|---------|---|
| 1063   | CG  | CG  | . LEU LEU LEU A A 142 142 . | 0.5971 | 0.5706 | 0.5502 | 0.0000  | 0.0037  |   |
| 0.0098 | 1   | .   |                             |        |        |        |         |         |   |
| 1064   | CD1 | CD1 | . LEU LEU LEU A A 142 142 . | 0.5795 | 0.5815 | 0.5562 | -0.0317 | 0.0172  |   |
| 0.0078 | 1   | .   |                             |        |        |        |         |         |   |
| 1065   | CD2 | CD2 | . LEU LEU LEU A A 142 142 . | 0.6268 | 0.5101 | 0.5247 | -0.0090 | 0.0129  |   |
| 0.0226 | 1   | .   |                             |        |        |        |         |         |   |
| 1066   | C   | C   | . LEU LEU LEU A A 142 142 . | 0.5720 | 0.5903 | 0.5652 | -0.0068 | -0.0056 |   |
| 0.0151 | 1   | .   |                             |        |        |        |         |         |   |
| 1067   | O   | O   | . LEU LEU LEU A A 142 142 . | 0.5693 | 0.5971 | 0.5677 | -0.0038 | -0.0228 |   |
| 0.0222 | 1   | .   |                             |        |        |        |         |         |   |
| 1068   | N   | N   | . ILE ILE ILE A A 143 143 . | 0.5327 | 0.5480 | 0.5187 | -0.0082 | 0.0025  |   |
| 0.0146 | 1   | .   |                             |        |        |        |         |         |   |
| 1069   | CA  | CA  | . ILE ILE ILE A A 143 143 . | 0.4824 | 0.5159 | 0.4809 | -0.0058 | 0.0084  |   |
| 0.0162 | 1   | .   |                             |        |        |        |         |         |   |
| 1070   | CB  | CB  | . ILE ILE ILE A A 143 143 . | 0.4986 | 0.5298 | 0.4896 | 0.0102  | 0.0092  |   |
| 0.0257 | 1   | .   |                             |        |        |        |         |         |   |
| 1071   | CG1 | CG1 | . ILE ILE ILE A A 143 143 . | 0.4750 | 0.5361 | 0.4993 | 0.0113  | 0.0265  |   |
| 0.0362 | 1   | .   |                             |        |        |        |         |         |   |
| 1072   | CD1 | CD1 | . ILE ILE ILE A A 143 143 . | 0.4916 | 0.5386 | 0.5580 | -0.0001 | 0.0156  |   |
| 0.0725 | 1   | .   |                             |        |        |        |         |         |   |
| 1073   | CG2 | CG2 | . ILE ILE ILE A A 143 143 . | 0.4844 | 0.5220 | 0.5125 | -0.0024 | 0.0189  |   |
| 0.0328 | 1   | .   |                             |        |        |        |         |         |   |
| 1074   | C   | C   | . ILE ILE ILE A A 143 143 . | 0.4353 | 0.4751 | 0.4574 | -0.0047 | 0.0100  |   |
| 0.0093 | 1   | .   |                             |        |        |        |         |         |   |
| 1075   | O   | O   | . ILE ILE ILE A A 143 143 . | 0.4073 | 0.4604 | 0.4309 | -0.0198 | 0.0264  |   |
| 0.0207 | 1   | .   |                             |        |        |        |         |         |   |
| 1076   | N   | N   | . LEU LEU LEU A A 144 144 . | 0.3817 | 0.4500 | 0.4246 | -0.0084 | 0.0164  |   |
| 0.0034 | 1   | .   |                             |        |        |        |         |         |   |
| 1077   | CA  | CA  | . LEU LEU LEU A A 144 144 . | 0.3547 | 0.4155 | 0.3905 | -0.0079 | 0.0012  | - |
| 0.0095 | 1   | .   |                             |        |        |        |         |         |   |
| 1078   | CB  | CB  | . LEU LEU LEU A A 144 144 . | 0.3328 | 0.4096 | 0.3569 | 0.0004  | 0.0006  | - |
| 0.0126 | 1   | .   |                             |        |        |        |         |         |   |
| 1079   | CG  | CG  | . LEU LEU LEU A A 144 144 . | 0.3910 | 0.4048 | 0.3662 | -0.0332 | 0.0315  | - |
| 0.0187 | 1   | .   |                             |        |        |        |         |         |   |
| 1080   | CD1 | CD1 | . LEU LEU LEU A A 144 144 . | 0.3833 | 0.3794 | 0.3703 | 0.0113  | 0.0264  | - |
| 0.0467 | 1   | .   |                             |        |        |        |         |         |   |
| 1081   | CD2 | CD2 | . LEU LEU LEU A A 144 144 . | 0.3603 | 0.4863 | 0.3185 | -0.0042 | 0.0917  | - |
| 0.0829 | 1   | .   |                             |        |        |        |         |         |   |
| 1082   | C   | C   | . LEU LEU LEU A A 144 144 . | 0.3320 | 0.4131 | 0.3819 | 0.0007  | -0.0086 | - |
| 0.0185 | 1   | .   |                             |        |        |        |         |         |   |
| 1083   | O   | O   | . LEU LEU LEU A A 144 144 . | 0.3022 | 0.4239 | 0.3850 | 0.0110  | -0.0286 | - |
| 0.0246 | 1   | .   |                             |        |        |        |         |         |   |
| 1084   | N   | N   | . PRO PRO PRO A A 145 145 . | 0.3250 | 0.4028 | 0.3450 | 0.0022  | -0.0030 | - |
| 0.0169 | 1   | .   |                             |        |        |        |         |         |   |
| 1085   | CA  | CA  | . PRO PRO PRO A A 145 145 . | 0.3341 | 0.3794 | 0.3414 | 0.0044  | -0.0091 | - |
| 0.0125 | 1   | .   |                             |        |        |        |         |         |   |
| 1086   | CB  | CB  | . PRO PRO PRO A A 145 145 . | 0.3452 | 0.3946 | 0.3489 | 0.0054  | -0.0076 | - |
| 0.0123 | 1   | .   |                             |        |        |        |         |         |   |
| 1087   | CG  | CG  | . PRO PRO PRO A A 145 145 . | 0.3246 | 0.3884 | 0.3352 | 0.0326  | -0.0143 | - |
| 0.0241 | 1   | .   |                             |        |        |        |         |         |   |
| 1088   | CD  | CD  | . PRO PRO PRO A A 145 145 . | 0.3068 | 0.3969 | 0.3671 | -0.0186 | -0.0063 | - |
| 0.0283 | 1   | .   |                             |        |        |        |         |         |   |
| 1089   | C   | C   | . PRO PRO PRO A A 145 145 . | 0.3446 | 0.3724 | 0.3469 | 0.0089  | -0.0073 | - |
| 0.0110 | 1   | .   |                             |        |        |        |         |         |   |
| 1090   | O   | O   | . PRO PRO PRO A A 145 145 . | 0.3592 | 0.3808 | 0.3392 | 0.0022  | -0.0095 | - |
| 0.0008 | 1   | .   |                             |        |        |        |         |         |   |
| 1091   | N   | N   | . VAL VAL VAL A A 146 146 . | 0.3551 | 0.3559 | 0.3450 | 0.0019  | 0.0041  | - |
| 0.0166 | 1   | .   |                             |        |        |        |         |         |   |
| 1092   | CA  | CA  | . VAL VAL VAL A A 146 146 . | 0.3789 | 0.3558 | 0.3272 | 0.0010  | 0.0184  | - |
| 0.0035 | 1   | .   |                             |        |        |        |         |         |   |







|        |     |     |                             |        |        |        |         |         |   |
|--------|-----|-----|-----------------------------|--------|--------|--------|---------|---------|---|
| 1183   | C   | C   | . GLY GLY GLY A A 159 159 . | 0.4299 | 0.4535 | 0.4625 | -0.0108 | -0.0109 | - |
| 0.0026 | 1   | .   |                             |        |        |        |         |         |   |
| 1184   | O   | O   | . GLY GLY GLY A A 159 159 . | 0.4087 | 0.4454 | 0.4918 | -0.0099 | -0.0148 | - |
| 0.0234 | 1   | .   |                             |        |        |        |         |         |   |
| 1185   | N   | N   | . ASN ASN ASN A A 160 160 . | 0.4240 | 0.4620 | 0.4693 | -0.0021 | -0.0119 | - |
| 0.0078 | 1   | .   |                             |        |        |        |         |         |   |
| 1186   | CA  | CA  | . ASN ASN ASN A A 160 160 . | 0.4172 | 0.4542 | 0.4626 | 0.0050  | -0.0038 | - |
| 0.0052 | 1   | .   |                             |        |        |        |         |         |   |
| 1187   | CB  | CB  | . ASN ASN ASN A A 160 160 . | 0.4135 | 0.4469 | 0.4649 | 0.0077  | -0.0033 | - |
| 0.0079 | 1   | .   |                             |        |        |        |         |         |   |
| 1188   | CG  | CG  | . ASN ASN ASN A A 160 160 . | 0.4043 | 0.4327 | 0.4222 | 0.0165  | -0.0164 | - |
| 0.0030 | 1   | .   |                             |        |        |        |         |         |   |
| 1189   | OD1 | OD1 | . ASN ASN ASN A A 160 160 . | 0.2734 | 0.4404 | 0.4046 | -0.0012 | -0.0515 | - |
| 0.0283 | 1   | .   |                             |        |        |        |         |         |   |
| 1190   | ND2 | ND2 | . ASN ASN ASN A A 160 160 . | 0.3939 | 0.4282 | 0.4266 | 0.0215  | -0.0155 | - |
| 0.0351 | 1   | .   |                             |        |        |        |         |         |   |
| 1191   | C   | C   | . ASN ASN ASN A A 160 160 . | 0.4117 | 0.4535 | 0.4654 | 0.0136  | -0.0019 | - |
| 0.0065 | 1   | .   |                             |        |        |        |         |         |   |
| 1192   | O   | O   | . ASN ASN ASN A A 160 160 . | 0.3881 | 0.4738 | 0.4779 | 0.0376  | 0.0102  | - |
| 0.0172 | 1   | .   |                             |        |        |        |         |         |   |
| 1193   | N   | N   | . LYS LYS LYS A A 161 161 . | 0.4080 | 0.4690 | 0.4804 | 0.0152  | -0.0001 | - |
| 0.0038 | 1   | .   |                             |        |        |        |         |         |   |
| 1194   | CA  | CA  | . LYS LYS LYS A A 161 161 . | 0.4255 | 0.4812 | 0.4794 | 0.0056  | 0.0056  | - |
| 0.0004 | 1   | .   |                             |        |        |        |         |         |   |
| 1195   | CB  | CB  | . LYS LYS LYS A A 161 161 . | 0.4194 | 0.4925 | 0.4840 | -0.0053 | -0.0055 | - |
| 0.0048 | 1   | .   |                             |        |        |        |         |         |   |
| 1196   | CG  | CG  | . LYS LYS LYS A A 161 161 . | 0.4291 | 0.5078 | 0.5260 | 0.0097  | 0.0171  | - |
| 0.0051 | 1   | .   |                             |        |        |        |         |         |   |
| 1197   | CD  | CD  | . LYS LYS LYS A A 161 161 . | 0.4899 | 0.5612 | 0.6017 | -0.0238 | 0.0125  | - |
| 0.0124 | 1   | .   |                             |        |        |        |         |         |   |
| 1198   | CE  | CE  | . LYS LYS LYS A A 161 161 . | 0.5621 | 0.5956 | 0.6620 | -0.0591 | 0.0201  | - |
| 0.0177 | 1   | .   |                             |        |        |        |         |         |   |
| 1199   | NZ  | NZ  | . LYS LYS LYS A A 161 161 . | 0.6040 | 0.6799 | 0.7306 | -0.0380 | -0.0118 | - |
| 0.0332 | 1   | .   |                             |        |        |        |         |         |   |
| 1200   | C   | C   | . LYS LYS LYS A A 161 161 . | 0.4180 | 0.4688 | 0.4789 | 0.0059  | 0.0108  | - |
| 0.0007 | 1   | .   |                             |        |        |        |         |         |   |
| 1201   | O   | O   | . LYS LYS LYS A A 161 161 . | 0.3693 | 0.4529 | 0.4924 | 0.0158  | 0.0179  | - |
| 0.0077 | 1   | .   |                             |        |        |        |         |         |   |
| 1202   | N   | N   | . LEU LEU LEU A A 162 162 . | 0.4235 | 0.4658 | 0.4774 | 0.0051  | 0.0178  | - |
| 0.0084 | 1   | .   |                             |        |        |        |         |         |   |
| 1203   | CA  | CA  | . LEU LEU LEU A A 162 162 . | 0.4225 | 0.4543 | 0.4576 | 0.0119  | 0.0096  | - |
| 0.0076 | 1   | .   |                             |        |        |        |         |         |   |
| 1204   | CB  | CB  | . LEU LEU LEU A A 162 162 . | 0.3989 | 0.4518 | 0.4622 | 0.0106  | 0.0023  | - |
| 0.0114 | 1   | .   |                             |        |        |        |         |         |   |
| 1205   | CG  | CG  | . LEU LEU LEU A A 162 162 . | 0.3610 | 0.4439 | 0.4675 | 0.0058  | -0.0123 | - |
| 0.0121 | 1   | .   |                             |        |        |        |         |         |   |
| 1206   | CD1 | CD1 | . LEU LEU LEU A A 162 162 . | 0.3098 | 0.4974 | 0.4908 | 0.0068  | -0.0299 | - |
| 0.0232 | 1   | .   |                             |        |        |        |         |         |   |
| 1207   | CD2 | CD2 | . LEU LEU LEU A A 162 162 . | 0.2492 | 0.4787 | 0.5213 | -0.0160 | -0.0137 | - |
| 0.0187 | 1   | .   |                             |        |        |        |         |         |   |
| 1208   | C   | C   | . LEU LEU LEU A A 162 162 . | 0.4155 | 0.4402 | 0.4499 | 0.0128  | 0.0089  | - |
| 0.0141 | 1   | .   |                             |        |        |        |         |         |   |
| 1209   | O   | O   | . LEU LEU LEU A A 162 162 . | 0.3814 | 0.4293 | 0.4327 | 0.0199  | 0.0000  | - |
| 0.0324 | 1   | .   |                             |        |        |        |         |         |   |
| 1210   | N   | N   | . ALA ALA ALA A A 163 163 . | 0.4211 | 0.4375 | 0.4491 | 0.0115  | 0.0097  | - |
| 0.0069 | 1   | .   |                             |        |        |        |         |         |   |
| 1211   | CA  | CA  | . ALA ALA ALA A A 163 163 . | 0.4236 | 0.4401 | 0.4428 | 0.0024  | 0.0064  | - |
| 0.0011 | 1   | .   |                             |        |        |        |         |         |   |
| 1212   | CB  | CB  | . ALA ALA ALA A A 163 163 . | 0.4048 | 0.4462 | 0.4492 | 0.0011  | -0.0008 | - |
| 0.0041 | 1   | .   |                             |        |        |        |         |         |   |



|        |     |     |                             |        |        |        |         |         |   |
|--------|-----|-----|-----------------------------|--------|--------|--------|---------|---------|---|
| 1243   | CB  | CB  | . PHE PHE PHE A A 167 167 . | 0.3136 | 0.3596 | 0.3988 | 0.0074  | 0.0021  |   |
| 0.0025 | 1   | .   |                             |        |        |        |         |         |   |
| 1244   | CG  | CG  | . PHE PHE PHE A A 167 167 . | 0.3459 | 0.4145 | 0.4207 | 0.0113  | -0.0046 | - |
| 0.0223 | 1   | .   |                             |        |        |        |         |         |   |
| 1245   | CD1 | CD1 | . PHE PHE PHE A A 167 167 . | 0.3338 | 0.4494 | 0.4169 | 0.0055  | 0.0113  | - |
| 0.0265 | 1   | .   |                             |        |        |        |         |         |   |
| 1246   | CE1 | CE1 | . PHE PHE PHE A A 167 167 . | 0.3912 | 0.4629 | 0.4380 | 0.0313  | -0.0144 | - |
| 0.0454 | 1   | .   |                             |        |        |        |         |         |   |
| 1247   | CZ  | CZ  | . PHE PHE PHE A A 167 167 . | 0.3318 | 0.4632 | 0.3878 | 0.0087  | -0.0017 | - |
| 0.0304 | 1   | .   |                             |        |        |        |         |         |   |
| 1248   | CE2 | CE2 | . PHE PHE PHE A A 167 167 . | 0.3649 | 0.4327 | 0.4386 | 0.0363  | -0.0201 | - |
| 0.0705 | 1   | .   |                             |        |        |        |         |         |   |
| 1249   | CD2 | CD2 | . PHE PHE PHE A A 167 167 . | 0.3250 | 0.4340 | 0.4032 | 0.0016  | -0.0084 | - |
| 0.0586 | 1   | .   |                             |        |        |        |         |         |   |
| 1250   | C   | C   | . PHE PHE PHE A A 167 167 . | 0.3226 | 0.3758 | 0.3849 | -0.0003 | 0.0025  | - |
| 0.0089 | 1   | .   |                             |        |        |        |         |         |   |
| 1251   | O   | O   | . PHE PHE PHE A A 167 167 . | 0.2979 | 0.3826 | 0.3870 | 0.0075  | -0.0023 | - |
| 0.0081 | 1   | .   |                             |        |        |        |         |         |   |
| 1252   | N   | N   | . MET MET MET A A 168 168 . | 0.3443 | 0.3776 | 0.3836 | -0.0096 | 0.0045  | - |
| 0.0162 | 1   | .   |                             |        |        |        |         |         |   |
| 1253   | CA  | CA  | . MET MET MET A A 168 168 . | 0.3618 | 0.3845 | 0.3864 | 0.0004  | 0.0050  | - |
| 0.0189 | 1   | .   |                             |        |        |        |         |         |   |
| 1254   | CB  | CB  | . MET MET MET A A 168 168 . | 0.3527 | 0.3936 | 0.3916 | -0.0120 | 0.0035  | - |
| 0.0214 | 1   | .   |                             |        |        |        |         |         |   |
| 1255   | CG  | CG  | . MET MET MET A A 168 168 . | 0.4189 | 0.4068 | 0.4113 | 0.0219  | 0.0301  | - |
| 0.0223 | 1   | .   |                             |        |        |        |         |         |   |
| 1256   | SD  | SD  | . MET MET MET A A 168 168 . | 0.3942 | 0.4290 | 0.5121 | 0.0073  | -0.0233 | - |
| 0.0298 | 1   | .   |                             |        |        |        |         |         |   |
| 1257   | CE  | CE  | . MET MET MET A A 168 168 . | 0.3619 | 0.3417 | 0.4061 | 0.0121  | -0.0359 | - |
| 0.0281 | 1   | .   |                             |        |        |        |         |         |   |
| 1258   | C   | C   | . MET MET MET A A 168 168 . | 0.3643 | 0.3983 | 0.3894 | 0.0018  | -0.0005 | - |
| 0.0144 | 1   | .   |                             |        |        |        |         |         |   |
| 1259   | O   | O   | . MET MET MET A A 168 168 . | 0.3901 | 0.3999 | 0.3954 | 0.0057  | -0.0007 | - |
| 0.0332 | 1   | .   |                             |        |        |        |         |         |   |
| 1260   | N   | N   | . ILE ILE ILE A A 169 169 . | 0.3726 | 0.4048 | 0.3851 | -0.0030 | -0.0046 | - |
| 0.0115 | 1   | .   |                             |        |        |        |         |         |   |
| 1261   | CA  | CA  | . ILE ILE ILE A A 169 169 . | 0.3508 | 0.3982 | 0.3854 | -0.0042 | -0.0021 | - |
| 0.0104 | 1   | .   |                             |        |        |        |         |         |   |
| 1262   | CB  | CB  | . ILE ILE ILE A A 169 169 . | 0.3556 | 0.4056 | 0.3931 | -0.0150 | -0.0014 | - |
| 0.0115 | 1   | .   |                             |        |        |        |         |         |   |
| 1263   | CG1 | CG1 | . ILE ILE ILE A A 169 169 . | 0.3044 | 0.3937 | 0.4017 | -0.0280 | 0.0033  | - |
| 0.0103 | 1   | .   |                             |        |        |        |         |         |   |
| 1264   | CD1 | CD1 | . ILE ILE ILE A A 169 169 . | 0.1588 | 0.3785 | 0.4701 | -0.1122 | -0.0232 |   |
| 0.0098 | 1   | .   |                             |        |        |        |         |         |   |
| 1265   | CG2 | CG2 | . ILE ILE ILE A A 169 169 . | 0.3279 | 0.4110 | 0.4060 | 0.0086  | 0.0006  | - |
| 0.0215 | 1   | .   |                             |        |        |        |         |         |   |
| 1266   | C   | C   | . ILE ILE ILE A A 169 169 . | 0.3676 | 0.3997 | 0.3786 | -0.0107 | 0.0006  | - |
| 0.0062 | 1   | .   |                             |        |        |        |         |         |   |
| 1267   | O   | O   | . ILE ILE ILE A A 169 169 . | 0.3428 | 0.4018 | 0.3740 | 0.0034  | -0.0034 | - |
| 0.0070 | 1   | .   |                             |        |        |        |         |         |   |
| 1268   | N   | N   | . LEU LEU LEU A A 170 170 . | 0.3623 | 0.3987 | 0.3795 | -0.0133 | -0.0019 | - |
| 0.0004 | 1   | .   |                             |        |        |        |         |         |   |
| 1269   | CA  | CA  | . LEU LEU LEU A A 170 170 . | 0.3414 | 0.3804 | 0.3587 | -0.0194 | 0.0040  |   |
| 0.0081 | 1   | .   |                             |        |        |        |         |         |   |
| 1270   | CB  | CB  | . LEU LEU LEU A A 170 170 . | 0.3197 | 0.3826 | 0.3702 | -0.0168 | 0.0045  |   |
| 0.0070 | 1   | .   |                             |        |        |        |         |         |   |
| 1271   | CG  | CG  | . LEU LEU LEU A A 170 170 . | 0.3295 | 0.3894 | 0.3515 | -0.0331 | 0.0160  | - |
| 0.0029 | 1   | .   |                             |        |        |        |         |         |   |
| 1272   | CD1 | CD1 | . LEU LEU LEU A A 170 170 . | 0.3826 | 0.4164 | 0.3384 | -0.0069 | 0.0593  |   |
| 0.0184 | 1   | .   |                             |        |        |        |         |         |   |





|        |     |     |                   |         |                                        |   |
|--------|-----|-----|-------------------|---------|----------------------------------------|---|
| 1303   | CD  | CD  | . GLU GLU GLU A A | 175 175 | . 0.6684 0.7348 0.6063 -0.0429 0.0112  | - |
| 0.0147 | 1   | .   |                   |         |                                        |   |
| 1304   | OE1 | OE1 | . GLU GLU GLU A A | 175 175 | . 0.7551 0.7910 0.6483 -0.0333 -0.0709 |   |
| 0.0016 | 1   | .   |                   |         |                                        |   |
| 1305   | OE2 | OE2 | . GLU GLU GLU A A | 175 175 | . 0.6653 0.7539 0.6470 -0.0796 0.0095  | - |
| 0.0348 | 1   | .   |                   |         |                                        |   |
| 1306   | C   | C   | . GLU GLU GLU A A | 175 175 | . 0.4469 0.4460 0.4263 0.0183 0.0148   |   |
| 0.0035 | 1   | .   |                   |         |                                        |   |
| 1307   | O   | O   | . GLU GLU GLU A A | 175 175 | . 0.4759 0.4577 0.4172 0.0147 0.0211   | - |
| 0.0033 | 1   | .   |                   |         |                                        |   |
| 1308   | N   | N   | . SER SER SER A A | 176 176 | . 0.4248 0.4080 0.4044 0.0249 0.0123   |   |
| 0.0148 | 1   | .   |                   |         |                                        |   |
| 1309   | CA  | CA  | . SER SER SER A A | 176 176 | . 0.4008 0.3983 0.3952 0.0227 0.0038   |   |
| 0.0115 | 1   | .   |                   |         |                                        |   |
| 1310   | CB  | CB  | . SER SER SER A A | 176 176 | . 0.4273 0.4041 0.4039 0.0345 0.0065   |   |
| 0.0132 | 1   | .   |                   |         |                                        |   |
| 1311   | OG  | OG  | . SER SER SER A A | 176 176 | . 0.4321 0.4012 0.4480 0.0162 0.0293   |   |
| 0.0371 | 1   | .   |                   |         |                                        |   |
| 1312   | C   | C   | . SER SER SER A A | 176 176 | . 0.3835 0.3848 0.3825 0.0195 -0.0029  |   |
| 0.0098 | 1   | .   |                   |         |                                        |   |
| 1313   | O   | O   | . SER SER SER A A | 176 176 | . 0.3500 0.3669 0.3788 0.0223 -0.0229  |   |
| 0.0018 | 1   | .   |                   |         |                                        |   |
| 1314   | N   | N   | . PHE PHE PHE A A | 177 177 | . 0.3740 0.3701 0.3703 0.0235 0.0017   |   |
| 0.0042 | 1   | .   |                   |         |                                        |   |
| 1315   | CA  | CA  | . PHE PHE PHE A A | 177 177 | . 0.3763 0.3751 0.3642 0.0181 -0.0065  |   |
| 0.0075 | 1   | .   |                   |         |                                        |   |
| 1316   | CB  | CB  | . PHE PHE PHE A A | 177 177 | . 0.3699 0.3637 0.3541 0.0221 -0.0019  | - |
| 0.0015 | 1   | .   |                   |         |                                        |   |
| 1317   | CG  | CG  | . PHE PHE PHE A A | 177 177 | . 0.3393 0.3983 0.3488 0.0129 0.0233   |   |
| 0.0250 | 1   | .   |                   |         |                                        |   |
| 1318   | CD1 | CD1 | . PHE PHE PHE A A | 177 177 | . 0.2917 0.3567 0.3119 0.0230 0.0184   |   |
| 0.0077 | 1   | .   |                   |         |                                        |   |
| 1319   | CE1 | CE1 | . PHE PHE PHE A A | 177 177 | . 0.2600 0.3817 0.3220 -0.0073 0.0039  | - |
| 0.0153 | 1   | .   |                   |         |                                        |   |
| 1320   | CZ  | CZ  | . PHE PHE PHE A A | 177 177 | . 0.2607 0.3838 0.2907 0.0194 0.0217   | - |
| 0.0028 | 1   | .   |                   |         |                                        |   |
| 1321   | CE2 | CE2 | . PHE PHE PHE A A | 177 177 | . 0.3629 0.4165 0.3664 0.0522 0.0367   |   |
| 0.0117 | 1   | .   |                   |         |                                        |   |
| 1322   | CD2 | CD2 | . PHE PHE PHE A A | 177 177 | . 0.2965 0.3898 0.3295 0.0166 0.0203   | - |
| 0.0208 | 1   | .   |                   |         |                                        |   |
| 1323   | C   | C   | . PHE PHE PHE A A | 177 177 | . 0.3713 0.3803 0.3667 0.0181 -0.0094  |   |
| 0.0026 | 1   | .   |                   |         |                                        |   |
| 1324   | O   | O   | . PHE PHE PHE A A | 177 177 | . 0.3358 0.3634 0.3601 0.0337 -0.0145  |   |
| 0.0063 | 1   | .   |                   |         |                                        |   |
| 1325   | N   | N   | . ARG ARG ARG A A | 178 178 | . 0.3681 0.3745 0.3839 0.0277 -0.0052  | - |
| 0.0045 | 1   | .   |                   |         |                                        |   |
| 1326   | CA  | CA  | . ARG ARG ARG A A | 178 178 | . 0.3758 0.3902 0.3883 0.0189 -0.0009  |   |
| 0.0017 | 1   | .   |                   |         |                                        |   |
| 1327   | CB  | CB  | . ARG ARG ARG A A | 178 178 | . 0.3759 0.4130 0.4164 0.0161 -0.0144  |   |
| 0.0071 | 1   | .   |                   |         |                                        |   |
| 1328   | CG  | CG  | . ARG ARG ARG A A | 178 178 | . 0.4797 0.4923 0.4588 0.0175 0.0003   |   |
| 0.0346 | 1   | .   |                   |         |                                        |   |
| 1329   | CD  | CD  | . ARG ARG ARG A A | 178 178 | . 0.5479 0.5934 0.6207 0.0614 -0.0102  |   |
| 0.0344 | 1   | .   |                   |         |                                        |   |
| 1330   | NE  | NE  | . ARG ARG ARG A A | 178 178 | . 0.6880 0.6894 0.6447 0.0447 -0.0291  |   |
| 0.0475 | 1   | .   |                   |         |                                        |   |
| 1331   | CZ  | CZ  | . ARG ARG ARG A A | 178 178 | . 0.7952 0.7173 0.7246 0.0194 -0.0376  |   |
| 0.0242 | 1   | .   |                   |         |                                        |   |
| 1332   | NH1 | NH1 | . ARG ARG ARG A A | 178 178 | . 0.7780 0.7277 0.7182 0.0302 -0.0434  |   |
| 0.0290 | 1   | .   |                   |         |                                        |   |

|        |     |     |                             |        |        |        |         |         |   |
|--------|-----|-----|-----------------------------|--------|--------|--------|---------|---------|---|
| 1333   | NH2 | NH2 | . ARG ARG ARG A A 178 178 . | 0.8251 | 0.7592 | 0.6901 | 0.0060  | -0.0467 |   |
| 0.0098 | 1   | .   |                             |        |        |        |         |         |   |
| 1334   | C   | C   | . ARG ARG ARG A A 178 178 . | 0.3566 | 0.3987 | 0.3856 | 0.0159  | 0.0019  |   |
| 0.0013 | 1   | .   |                             |        |        |        |         |         |   |
| 1335   | O   | O   | . ARG ARG ARG A A 178 178 . | 0.3419 | 0.4051 | 0.3822 | 0.0260  | 0.0087  | - |
| 0.0048 | 1   | .   |                             |        |        |        |         |         |   |
| 1336   | N   | N   | . ASP ASP ASP A A 179 179 . | 0.3345 | 0.3785 | 0.3570 | 0.0149  | -0.0028 | - |
| 0.0039 | 1   | .   |                             |        |        |        |         |         |   |
| 1337   | CA  | CA  | . ASP ASP ASP A A 179 179 . | 0.3409 | 0.3755 | 0.3565 | 0.0178  | -0.0038 | - |
| 0.0095 | 1   | .   |                             |        |        |        |         |         |   |
| 1338   | CB  | CB  | . ASP ASP ASP A A 179 179 . | 0.3660 | 0.4004 | 0.3689 | 0.0080  | -0.0031 |   |
| 0.0040 | 1   | .   |                             |        |        |        |         |         |   |
| 1339   | CG  | CG  | . ASP ASP ASP A A 179 179 . | 0.4207 | 0.4270 | 0.4093 | 0.0173  | -0.0118 | - |
| 0.0038 | 1   | .   |                             |        |        |        |         |         |   |
| 1340   | OD1 | OD1 | . ASP ASP ASP A A 179 179 . | 0.4798 | 0.5167 | 0.4205 | 0.0122  | -0.0291 |   |
| 0.0427 | 1   | .   |                             |        |        |        |         |         |   |
| 1341   | OD2 | OD2 | . ASP ASP ASP A A 179 179 . | 0.4746 | 0.4864 | 0.4595 | 0.0684  | -0.0116 |   |
| 0.0109 | 1   | .   |                             |        |        |        |         |         |   |
| 1342   | C   | C   | . ASP ASP ASP A A 179 179 . | 0.3265 | 0.3605 | 0.3359 | 0.0130  | 0.0055  | - |
| 0.0028 | 1   | .   |                             |        |        |        |         |         |   |
| 1343   | O   | O   | . ASP ASP ASP A A 179 179 . | 0.3089 | 0.3700 | 0.3243 | 0.0210  | -0.0075 | - |
| 0.0210 | 1   | .   |                             |        |        |        |         |         |   |
| 1344   | N   | N   | . ALA ALA ALA A A 180 180 . | 0.3183 | 0.3603 | 0.3405 | 0.0283  | 0.0113  | - |
| 0.0161 | 1   | .   |                             |        |        |        |         |         |   |
| 1345   | CA  | CA  | . ALA ALA ALA A A 180 180 . | 0.3388 | 0.3515 | 0.3318 | 0.0225  | 0.0014  |   |
| 0.0011 | 1   | .   |                             |        |        |        |         |         |   |
| 1346   | CB  | CB  | . ALA ALA ALA A A 180 180 . | 0.3181 | 0.3263 | 0.3484 | 0.0160  | 0.0044  |   |
| 0.0043 | 1   | .   |                             |        |        |        |         |         |   |
| 1347   | C   | C   | . ALA ALA ALA A A 180 180 . | 0.3341 | 0.3464 | 0.3299 | 0.0167  | 0.0073  | - |
| 0.0052 | 1   | .   |                             |        |        |        |         |         |   |
| 1348   | O   | O   | . ALA ALA ALA A A 180 180 . | 0.3337 | 0.3226 | 0.3290 | 0.0176  | -0.0028 | - |
| 0.0177 | 1   | .   |                             |        |        |        |         |         |   |
| 1349   | N   | N   | . MET MET MET A A 181 181 . | 0.3433 | 0.3462 | 0.3229 | -0.0044 | 0.0030  | - |
| 0.0182 | 1   | .   |                             |        |        |        |         |         |   |
| 1350   | CA  | CA  | . MET MET MET A A 181 181 . | 0.3457 | 0.3541 | 0.3383 | 0.0039  | 0.0092  | - |
| 0.0076 | 1   | .   |                             |        |        |        |         |         |   |
| 1351   | CB  | CB  | . MET MET MET A A 181 181 . | 0.3588 | 0.3620 | 0.3419 | 0.0033  | 0.0084  | - |
| 0.0044 | 1   | .   |                             |        |        |        |         |         |   |
| 1352   | CG  | CG  | . MET MET MET A A 181 181 . | 0.3752 | 0.3424 | 0.3216 | 0.0128  | 0.0334  | - |
| 0.0097 | 1   | .   |                             |        |        |        |         |         |   |
| 1353   | SD  | SD  | . MET MET MET A A 181 181 . | 0.4095 | 0.3529 | 0.3315 | 0.0041  | -0.0073 |   |
| 0.0285 | 1   | .   |                             |        |        |        |         |         |   |
| 1354   | CE  | CE  | . MET MET MET A A 181 181 . | 0.3859 | 0.3083 | 0.2822 | -0.0003 | 0.0201  |   |
| 0.0182 | 1   | .   |                             |        |        |        |         |         |   |
| 1355   | C   | C   | . MET MET MET A A 181 181 . | 0.3478 | 0.3644 | 0.3451 | 0.0068  | 0.0127  | - |
| 0.0099 | 1   | .   |                             |        |        |        |         |         |   |
| 1356   | O   | O   | . MET MET MET A A 181 181 . | 0.3084 | 0.3808 | 0.3549 | 0.0315  | 0.0293  | - |
| 0.0237 | 1   | .   |                             |        |        |        |         |         |   |
| 1357   | N   | N   | . ARG ARG ARG A A 182 182 . | 0.3093 | 0.3567 | 0.3311 | 0.0235  | 0.0172  | - |
| 0.0083 | 1   | .   |                             |        |        |        |         |         |   |
| 1358   | CA  | CA  | . ARG ARG ARG A A 182 182 . | 0.3276 | 0.3454 | 0.3355 | 0.0018  | 0.0072  | - |
| 0.0138 | 1   | .   |                             |        |        |        |         |         |   |
| 1359   | CB  | CB  | . ARG ARG ARG A A 182 182 . | 0.3465 | 0.3441 | 0.3436 | 0.0109  | -0.0063 | - |
| 0.0024 | 1   | .   |                             |        |        |        |         |         |   |
| 1360   | CG  | CG  | . ARG ARG ARG A A 182 182 . | 0.3545 | 0.3775 | 0.3662 | -0.0408 | -0.0252 | - |
| 0.0198 | 1   | .   |                             |        |        |        |         |         |   |
| 1361   | CD  | CD  | . ARG ARG ARG A A 182 182 . | 0.4160 | 0.4339 | 0.5370 | 0.0644  | -0.0006 | - |
| 0.0164 | 1   | .   |                             |        |        |        |         |         |   |
| 1362   | NE  | NE  | . ARG ARG ARG A A 182 182 . | 0.5332 | 0.4912 | 0.6000 | 0.0506  | 0.0326  | - |
| 0.0215 | 1   | .   |                             |        |        |        |         |         |   |



|        |     |     |                             |        |        |        |         |         |   |
|--------|-----|-----|-----------------------------|--------|--------|--------|---------|---------|---|
| 1393   | O   | O   | . GLU GLU GLU A A 186 186 . | 0.2865 | 0.3593 | 0.3658 | -0.0077 | 0.0297  | - |
| 0.0051 | 1   | .   |                             |        |        |        |         |         |   |
| 1394   | N   | N   | . VAL VAL VAL A A 187 187 . | 0.3220 | 0.3286 | 0.3481 | -0.0017 | 0.0128  | - |
| 0.0159 | 1   | .   |                             |        |        |        |         |         |   |
| 1395   | CA  | CA  | . VAL VAL VAL A A 187 187 . | 0.3211 | 0.3196 | 0.3313 | -0.0068 | 0.0064  | - |
| 0.0254 | 1   | .   |                             |        |        |        |         |         |   |
| 1396   | CB  | CB  | . VAL VAL VAL A A 187 187 . | 0.3132 | 0.3159 | 0.3309 | -0.0018 | 0.0117  | - |
| 0.0227 | 1   | .   |                             |        |        |        |         |         |   |
| 1397   | CG1 | CG1 | . VAL VAL VAL A A 187 187 . | 0.3399 | 0.2940 | 0.3118 | -0.0085 | 0.0060  | - |
| 0.0504 | 1   | .   |                             |        |        |        |         |         |   |
| 1398   | CG2 | CG2 | . VAL VAL VAL A A 187 187 . | 0.3618 | 0.3065 | 0.3265 | 0.0021  | 0.0058  | - |
| 0.0048 | 1   | .   |                             |        |        |        |         |         |   |
| 1399   | C   | C   | . VAL VAL VAL A A 187 187 . | 0.3228 | 0.3413 | 0.3738 | -0.0087 | 0.0155  | - |
| 0.0142 | 1   | .   |                             |        |        |        |         |         |   |
| 1400   | O   | O   | . VAL VAL VAL A A 187 187 . | 0.3163 | 0.3306 | 0.4102 | -0.0106 | 0.0183  | - |
| 0.0188 | 1   | .   |                             |        |        |        |         |         |   |
| 1401   | N   | N   | . TYR TYR TYR A A 188 188 . | 0.3370 | 0.3559 | 0.3674 | -0.0151 | 0.0193  | - |
| 0.0232 | 1   | .   |                             |        |        |        |         |         |   |
| 1402   | CA  | CA  | . TYR TYR TYR A A 188 188 . | 0.3515 | 0.3680 | 0.3584 | -0.0146 | 0.0083  | - |
| 0.0121 | 1   | .   |                             |        |        |        |         |         |   |
| 1403   | CB  | CB  | . TYR TYR TYR A A 188 188 . | 0.3797 | 0.3693 | 0.3510 | -0.0202 | 0.0125  | - |
| 0.0035 | 1   | .   |                             |        |        |        |         |         |   |
| 1404   | CG  | CG  | . TYR TYR TYR A A 188 188 . | 0.3754 | 0.3385 | 0.3424 | -0.0192 | 0.0157  | - |
| 0.0018 | 1   | .   |                             |        |        |        |         |         |   |
| 1405   | CD1 | CD1 | . TYR TYR TYR A A 188 188 . | 0.3160 | 0.3607 | 0.3332 | -0.0277 | -0.0175 | - |
| 0.0133 | 1   | .   |                             |        |        |        |         |         |   |
| 1406   | CE1 | CE1 | . TYR TYR TYR A A 188 188 . | 0.3779 | 0.3987 | 0.3680 | -0.0438 | -0.0002 | - |
| 0.0088 | 1   | .   |                             |        |        |        |         |         |   |
| 1407   | CZ  | CZ  | . TYR TYR TYR A A 188 188 . | 0.3506 | 0.3857 | 0.3972 | -0.0426 | -0.0058 | - |
| 0.0161 | 1   | .   |                             |        |        |        |         |         |   |
| 1408   | OH  | OH  | . TYR TYR TYR A A 188 188 . | 0.3576 | 0.4466 | 0.4366 | -0.0312 | 0.0354  | - |
| 0.0065 | 1   | .   |                             |        |        |        |         |         |   |
| 1409   | CE2 | CE2 | . TYR TYR TYR A A 188 188 . | 0.3984 | 0.3852 | 0.4112 | -0.0138 | 0.0000  | - |
| 0.0285 | 1   | .   |                             |        |        |        |         |         |   |
| 1410   | CD2 | CD2 | . TYR TYR TYR A A 188 188 . | 0.3547 | 0.3620 | 0.3163 | -0.0413 | -0.0124 | - |
| 0.0254 | 1   | .   |                             |        |        |        |         |         |   |
| 1411   | C   | C   | . TYR TYR TYR A A 188 188 . | 0.3656 | 0.3718 | 0.3712 | -0.0094 | 0.0008  | - |
| 0.0154 | 1   | .   |                             |        |        |        |         |         |   |
| 1412   | O   | O   | . TYR TYR TYR A A 188 188 . | 0.3754 | 0.3795 | 0.3610 | -0.0175 | 0.0127  | - |
| 0.0191 | 1   | .   |                             |        |        |        |         |         |   |
| 1413   | N   | N   | . HIS HIS HIS A A 189 189 . | 0.3624 | 0.3759 | 0.3770 | 0.0025  | 0.0038  | - |
| 0.0228 | 1   | .   |                             |        |        |        |         |         |   |
| 1414   | CA  | CA  | . HIS HIS HIS A A 189 189 . | 0.3596 | 0.3816 | 0.3885 | -0.0015 | -0.0055 | - |
| 0.0117 | 1   | .   |                             |        |        |        |         |         |   |
| 1415   | CB  | CB  | . HIS HIS HIS A A 189 189 . | 0.3473 | 0.3955 | 0.3976 | -0.0063 | -0.0069 | - |
| 0.0158 | 1   | .   |                             |        |        |        |         |         |   |
| 1416   | CG  | CG  | . HIS HIS HIS A A 189 189 . | 0.4007 | 0.4135 | 0.4226 | -0.0191 | -0.0116 | - |
| 0.0253 | 1   | .   |                             |        |        |        |         |         |   |
| 1417   | ND1 | ND1 | . HIS HIS HIS A A 189 189 . | 0.4600 | 0.4577 | 0.4211 | -0.0722 | 0.0072  | - |
| 0.0038 | 1   | .   |                             |        |        |        |         |         |   |
| 1418   | CE1 | CE1 | . HIS HIS HIS A A 189 189 . | 0.4552 | 0.4849 | 0.3521 | -0.0533 | -0.0354 | - |
| 0.0360 | 1   | .   |                             |        |        |        |         |         |   |
| 1419   | NE2 | NE2 | . HIS HIS HIS A A 189 189 . | 0.3702 | 0.4427 | 0.4194 | -0.0127 | -0.0775 | - |
| 0.0764 | 1   | .   |                             |        |        |        |         |         |   |
| 1420   | CD2 | CD2 | . HIS HIS HIS A A 189 189 . | 0.4037 | 0.4077 | 0.4347 | -0.0012 | -0.0141 | - |
| 0.0316 | 1   | .   |                             |        |        |        |         |         |   |
| 1421   | C   | C   | . HIS HIS HIS A A 189 189 . | 0.3382 | 0.3843 | 0.3861 | 0.0012  | -0.0044 | - |
| 0.0082 | 1   | .   |                             |        |        |        |         |         |   |
| 1422   | O   | O   | . HIS HIS HIS A A 189 189 . | 0.3401 | 0.3747 | 0.3956 | -0.0015 | -0.0219 | - |
| 0.0042 | 1   | .   |                             |        |        |        |         |         |   |

|        |     |     |                             |        |        |        |         |         |   |
|--------|-----|-----|-----------------------------|--------|--------|--------|---------|---------|---|
| 1423   | N   | N   | . THR THR THR A A 190 190 . | 0.3318 | 0.3945 | 0.3906 | 0.0002  | 0.0033  | - |
| 0.0065 | 1   | .   |                             |        |        |        |         |         |   |
| 1424   | CA  | CA  | . THR THR THR A A 190 190 . | 0.3559 | 0.3902 | 0.3867 | 0.0018  | 0.0075  | - |
| 0.0096 | 1   | .   |                             |        |        |        |         |         |   |
| 1425   | CB  | CB  | . THR THR THR A A 190 190 . | 0.3493 | 0.3935 | 0.3764 | -0.0012 | 0.0090  | - |
| 0.0018 | 1   | .   |                             |        |        |        |         |         |   |
| 1426   | OG1 | OG1 | . THR THR THR A A 190 190 . | 0.3570 | 0.4116 | 0.3941 | -0.0062 | 0.0389  | - |
| 0.0058 | 1   | .   |                             |        |        |        |         |         |   |
| 1427   | CG2 | CG2 | . THR THR THR A A 190 190 . | 0.3518 | 0.3910 | 0.3258 | -0.0098 | 0.0024  | - |
| 0.0253 | 1   | .   |                             |        |        |        |         |         |   |
| 1428   | C   | C   | . THR THR THR A A 190 190 . | 0.3515 | 0.3994 | 0.3974 | -0.0056 | 0.0025  | - |
| 0.0025 | 1   | .   |                             |        |        |        |         |         |   |
| 1429   | O   | O   | . THR THR THR A A 190 190 . | 0.3640 | 0.4012 | 0.4033 | -0.0030 | -0.0028 | - |
| 0.0127 | 1   | .   |                             |        |        |        |         |         |   |
| 1430   | N   | N   | . LEU LEU LEU A A 191 191 . | 0.3585 | 0.3828 | 0.4010 | 0.0003  | 0.0025  | - |
| 0.0149 | 1   | .   |                             |        |        |        |         |         |   |
| 1431   | CA  | CA  | . LEU LEU LEU A A 191 191 . | 0.3706 | 0.3923 | 0.4043 | -0.0139 | -0.0098 | - |
| 0.0133 | 1   | .   |                             |        |        |        |         |         |   |
| 1432   | CB  | CB  | . LEU LEU LEU A A 191 191 . | 0.3631 | 0.3887 | 0.4042 | -0.0163 | -0.0138 | - |
| 0.0073 | 1   | .   |                             |        |        |        |         |         |   |
| 1433   | CG  | CG  | . LEU LEU LEU A A 191 191 . | 0.3304 | 0.3682 | 0.3699 | -0.0324 | -0.0288 | - |
| 0.0067 | 1   | .   |                             |        |        |        |         |         |   |
| 1434   | CD1 | CD1 | . LEU LEU LEU A A 191 191 . | 0.3051 | 0.3936 | 0.3394 | -0.0524 | -0.0002 | - |
| 0.0185 | 1   | .   |                             |        |        |        |         |         |   |
| 1435   | CD2 | CD2 | . LEU LEU LEU A A 191 191 . | 0.2792 | 0.3736 | 0.3345 | -0.0432 | -0.0369 | - |
| 0.0130 | 1   | .   |                             |        |        |        |         |         |   |
| 1436   | C   | C   | . LEU LEU LEU A A 191 191 . | 0.3871 | 0.4029 | 0.4178 | -0.0104 | -0.0052 | - |
| 0.0248 | 1   | .   |                             |        |        |        |         |         |   |
| 1437   | O   | O   | . LEU LEU LEU A A 191 191 . | 0.3933 | 0.4053 | 0.4386 | -0.0303 | 0.0020  | - |
| 0.0498 | 1   | .   |                             |        |        |        |         |         |   |
| 1438   | N   | N   | . LYS LYS LYS A A 192 192 . | 0.3896 | 0.4053 | 0.4107 | -0.0165 | -0.0138 | - |
| 0.0235 | 1   | .   |                             |        |        |        |         |         |   |
| 1439   | CA  | CA  | . LYS LYS LYS A A 192 192 . | 0.3901 | 0.4124 | 0.4108 | -0.0151 | 0.0015  | - |
| 0.0117 | 1   | .   |                             |        |        |        |         |         |   |
| 1440   | CB  | CB  | . LYS LYS LYS A A 192 192 . | 0.3857 | 0.4135 | 0.3914 | -0.0217 | -0.0045 | - |
| 0.0185 | 1   | .   |                             |        |        |        |         |         |   |
| 1441   | CG  | CG  | . LYS LYS LYS A A 192 192 . | 0.3934 | 0.4433 | 0.3676 | -0.0284 | -0.0080 | - |
| 0.0097 | 1   | .   |                             |        |        |        |         |         |   |
| 1442   | CD  | CD  | . LYS LYS LYS A A 192 192 . | 0.3784 | 0.4638 | 0.3090 | 0.0151  | -0.0331 | - |
| 0.0043 | 1   | .   |                             |        |        |        |         |         |   |
| 1443   | CE  | CE  | . LYS LYS LYS A A 192 192 . | 0.4633 | 0.5167 | 0.3936 | 0.0046  | -0.0725 | - |
| 0.0227 | 1   | .   |                             |        |        |        |         |         |   |
| 1444   | NZ  | NZ  | . LYS LYS LYS A A 192 192 . | 0.4059 | 0.5298 | 0.4551 | 0.0054  | -0.0765 | - |
| 0.0198 | 1   | .   |                             |        |        |        |         |         |   |
| 1445   | C   | C   | . LYS LYS LYS A A 192 192 . | 0.3910 | 0.4221 | 0.4335 | -0.0223 | 0.0011  | - |
| 0.0209 | 1   | .   |                             |        |        |        |         |         |   |
| 1446   | O   | O   | . LYS LYS LYS A A 192 192 . | 0.3659 | 0.4325 | 0.4491 | -0.0314 | 0.0071  | - |
| 0.0199 | 1   | .   |                             |        |        |        |         |         |   |
| 1447   | N   | N   | . GLY GLY GLY A A 193 193 . | 0.3889 | 0.4239 | 0.4290 | -0.0141 | -0.0070 | - |
| 0.0191 | 1   | .   |                             |        |        |        |         |         |   |
| 1448   | CA  | CA  | . GLY GLY GLY A A 193 193 . | 0.3896 | 0.4186 | 0.4195 | -0.0210 | -0.0022 | - |
| 0.0042 | 1   | .   |                             |        |        |        |         |         |   |
| 1449   | C   | C   | . GLY GLY GLY A A 193 193 . | 0.4108 | 0.4245 | 0.4243 | -0.0237 | 0.0008  | - |
| 0.0112 | 1   | .   |                             |        |        |        |         |         |   |
| 1450   | O   | O   | . GLY GLY GLY A A 193 193 . | 0.4027 | 0.4474 | 0.4382 | -0.0437 | -0.0077 | - |
| 0.0159 | 1   | .   |                             |        |        |        |         |         |   |
| 1451   | N   | N   | . VAL VAL VAL A A 194 194 . | 0.4105 | 0.4182 | 0.4073 | -0.0085 | -0.0034 | - |
| 0.0204 | 1   | .   |                             |        |        |        |         |         |   |
| 1452   | CA  | CA  | . VAL VAL VAL A A 194 194 . | 0.4034 | 0.4142 | 0.4181 | -0.0067 | 0.0091  | - |
| 0.0174 | 1   | .   |                             |        |        |        |         |         |   |



|        |     |     |                             |        |        |        |         |         |   |
|--------|-----|-----|-----------------------------|--------|--------|--------|---------|---------|---|
| 1483   | N   | N   | . LYS LYS LYS A A 198 198 . | 0.4907 | 0.4881 | 0.5087 | -0.0076 | -0.0094 | - |
| 0.0120 | 1   | .   |                             |        |        |        |         |         |   |
| 1484   | CA  | CA  | . LYS LYS LYS A A 198 198 . | 0.5056 | 0.4902 | 0.5088 | -0.0040 | -0.0104 | - |
| 0.0179 | 1   | .   |                             |        |        |        |         |         |   |
| 1485   | CB  | CB  | . LYS LYS LYS A A 198 198 . | 0.5044 | 0.4743 | 0.4978 | -0.0083 | -0.0116 | - |
| 0.0123 | 1   | .   |                             |        |        |        |         |         |   |
| 1486   | CG  | CG  | . LYS LYS LYS A A 198 198 . | 0.5550 | 0.5255 | 0.5246 | 0.0005  | -0.0308 | - |
| 0.0113 | 1   | .   |                             |        |        |        |         |         |   |
| 1487   | CD  | CD  | . LYS LYS LYS A A 198 198 . | 0.5636 | 0.5416 | 0.5183 | -0.0058 | -0.0574 | - |
| 0.0092 | 1   | .   |                             |        |        |        |         |         |   |
| 1488   | CE  | CE  | . LYS LYS LYS A A 198 198 . | 0.5926 | 0.5719 | 0.5563 | -0.0247 | -0.0736 | - |
| 0.0152 | 1   | .   |                             |        |        |        |         |         |   |
| 1489   | NZ  | NZ  | . LYS LYS LYS A A 198 198 . | 0.6113 | 0.6013 | 0.5240 | -0.0376 | -0.1389 | - |
| 0.0028 | 1   | .   |                             |        |        |        |         |         |   |
| 1490   | C   | C   | . LYS LYS LYS A A 198 198 . | 0.5032 | 0.5123 | 0.5139 | -0.0135 | -0.0054 | - |
| 0.0133 | 1   | .   |                             |        |        |        |         |         |   |
| 1491   | O   | O   | . LYS LYS LYS A A 198 198 . | 0.5202 | 0.5137 | 0.5415 | -0.0327 | 0.0006  | - |
| 0.0169 | 1   | .   |                             |        |        |        |         |         |   |
| 1492   | N   | N   | . TYR TYR TYR A A 199 199 . | 0.4952 | 0.5246 | 0.5037 | -0.0059 | -0.0054 | - |
| 0.0147 | 1   | .   |                             |        |        |        |         |         |   |
| 1493   | CA  | CA  | . TYR TYR TYR A A 199 199 . | 0.4813 | 0.5113 | 0.4951 | 0.0016  | -0.0110 | - |
| 0.0063 | 1   | .   |                             |        |        |        |         |         |   |
| 1494   | CB  | CB  | . TYR TYR TYR A A 199 199 . | 0.4607 | 0.5141 | 0.4991 | -0.0009 | -0.0117 | - |
| 0.0020 | 1   | .   |                             |        |        |        |         |         |   |
| 1495   | CG  | CG  | . TYR TYR TYR A A 199 199 . | 0.4501 | 0.5083 | 0.4879 | -0.0009 | -0.0007 | - |
| 0.0093 | 1   | .   |                             |        |        |        |         |         |   |
| 1496   | CD1 | CD1 | . TYR TYR TYR A A 199 199 . | 0.3434 | 0.4895 | 0.5088 | 0.0113  | 0.0180  | - |
| 0.0003 | 1   | .   |                             |        |        |        |         |         |   |
| 1497   | CE1 | CE1 | . TYR TYR TYR A A 199 199 . | 0.3984 | 0.4941 | 0.5139 | -0.0155 | -0.0086 | - |
| 0.0049 | 1   | .   |                             |        |        |        |         |         |   |
| 1498   | CZ  | CZ  | . TYR TYR TYR A A 199 199 . | 0.4113 | 0.5182 | 0.5032 | 0.0271  | -0.0060 | - |
| 0.0083 | 1   | .   |                             |        |        |        |         |         |   |
| 1499   | OH  | OH  | . TYR TYR TYR A A 199 199 . | 0.4149 | 0.5444 | 0.5467 | 0.0173  | -0.0357 | - |
| 0.0507 | 1   | .   |                             |        |        |        |         |         |   |
| 1500   | CE2 | CE2 | . TYR TYR TYR A A 199 199 . | 0.4096 | 0.5316 | 0.5325 | 0.0044  | -0.0051 | - |
| 0.0094 | 1   | .   |                             |        |        |        |         |         |   |
| 1501   | CD2 | CD2 | . TYR TYR TYR A A 199 199 . | 0.4111 | 0.4662 | 0.4975 | -0.0002 | -0.0168 | - |
| 0.0043 | 1   | .   |                             |        |        |        |         |         |   |
| 1502   | C   | C   | . TYR TYR TYR A A 199 199 . | 0.4824 | 0.5127 | 0.4831 | 0.0066  | -0.0054 | - |
| 0.0018 | 1   | .   |                             |        |        |        |         |         |   |
| 1503   | O   | O   | . TYR TYR TYR A A 199 199 . | 0.4882 | 0.5297 | 0.4711 | 0.0171  | -0.0118 | - |
| 0.0026 | 1   | .   |                             |        |        |        |         |         |   |
| 1504   | N   | N   | . GLY GLY GLY A A 200 200 . | 0.4793 | 0.5050 | 0.4732 | 0.0007  | -0.0058 | - |
| 0.0082 | 1   | .   |                             |        |        |        |         |         |   |
| 1505   | CA  | CA  | . GLY GLY GLY A A 200 200 . | 0.4675 | 0.4866 | 0.4685 | -0.0006 | -0.0124 | - |
| 0.0008 | 1   | .   |                             |        |        |        |         |         |   |
| 1506   | C   | C   | . GLY GLY GLY A A 200 200 . | 0.4590 | 0.4782 | 0.4648 | -0.0037 | -0.0114 | - |
| 0.0022 | 1   | .   |                             |        |        |        |         |         |   |
| 1507   | O   | O   | . GLY GLY GLY A A 200 200 . | 0.4128 | 0.4580 | 0.4219 | -0.0051 | -0.0299 | - |
| 0.0006 | 1   | .   |                             |        |        |        |         |         |   |
| 1508   | N   | N   | . LYS LYS LYS A A 201 201 . | 0.4782 | 0.4868 | 0.4711 | -0.0051 | -0.0107 | - |
| 0.0119 | 1   | .   |                             |        |        |        |         |         |   |
| 1509   | CA  | CA  | . LYS LYS LYS A A 201 201 . | 0.4959 | 0.5211 | 0.4962 | -0.0015 | -0.0098 | - |
| 0.0143 | 1   | .   |                             |        |        |        |         |         |   |
| 1510   | CB  | CB  | . LYS LYS LYS A A 201 201 . | 0.5267 | 0.5503 | 0.4961 | 0.0000  | -0.0097 | - |
| 0.0199 | 1   | .   |                             |        |        |        |         |         |   |
| 1511   | CG  | CG  | . LYS LYS LYS A A 201 201 . | 0.5837 | 0.6335 | 0.5619 | -0.0065 | 0.0107  | - |
| 0.0320 | 1   | .   |                             |        |        |        |         |         |   |
| 1512   | CD  | CD  | . LYS LYS LYS A A 201 201 . | 0.6362 | 0.6939 | 0.6035 | 0.0005  | 0.0126  | - |
| 0.0550 | 1   | .   |                             |        |        |        |         |         |   |





|        |     |     |                             |        |        |        |         |         |   |
|--------|-----|-----|-----------------------------|--------|--------|--------|---------|---------|---|
| 1543   | C   | C   | . ASN ASN ASN A A 205 205 . | 0.3668 | 0.4023 | 0.3997 | -0.0079 | 0.0008  | - |
| 0.0120 | 1   | .   |                             |        |        |        |         |         |   |
| 1544   | O   | O   | . ASN ASN ASN A A 205 205 . | 0.3964 | 0.4197 | 0.4199 | -0.0223 | 0.0052  | - |
| 0.0219 | 1   | .   |                             |        |        |        |         |         |   |
| 1545   | N   | N   | . VAL VAL VAL A A 206 206 . | 0.3680 | 0.3817 | 0.3879 | -0.0082 | 0.0133  | - |
| 0.0108 | 1   | .   |                             |        |        |        |         |         |   |
| 1546   | CA  | CA  | . VAL VAL VAL A A 206 206 . | 0.3389 | 0.3638 | 0.3809 | -0.0088 | 0.0085  | - |
| 0.0096 | 1   | .   |                             |        |        |        |         |         |   |
| 1547   | CB  | CB  | . VAL VAL VAL A A 206 206 . | 0.3412 | 0.3552 | 0.3828 | -0.0132 | 0.0029  | - |
| 0.0060 | 1   | .   |                             |        |        |        |         |         |   |
| 1548   | CG1 | CG1 | . VAL VAL VAL A A 206 206 . | 0.3193 | 0.3732 | 0.3789 | 0.0207  | 0.0019  | - |
| 0.0561 | 1   | .   |                             |        |        |        |         |         |   |
| 1549   | CG2 | CG2 | . VAL VAL VAL A A 206 206 . | 0.2717 | 0.3489 | 0.3646 | -0.0369 | -0.0068 |   |
| 0.0147 | 1   | .   |                             |        |        |        |         |         |   |
| 1550   | C   | C   | . VAL VAL VAL A A 206 206 . | 0.3300 | 0.3737 | 0.3741 | -0.0147 | 0.0106  |   |
| 0.0017 | 1   | .   |                             |        |        |        |         |         |   |
| 1551   | O   | O   | . VAL VAL VAL A A 206 206 . | 0.3163 | 0.3716 | 0.3884 | -0.0224 | 0.0208  | - |
| 0.0012 | 1   | .   |                             |        |        |        |         |         |   |
| 1552   | N   | N   | . GLY GLY GLY A A 207 207 . | 0.3291 | 0.3832 | 0.3652 | -0.0062 | 0.0066  |   |
| 0.0022 | 1   | .   |                             |        |        |        |         |         |   |
| 1553   | CA  | CA  | . GLY GLY GLY A A 207 207 . | 0.3294 | 0.3607 | 0.3385 | -0.0112 | 0.0146  |   |
| 0.0023 | 1   | .   |                             |        |        |        |         |         |   |
| 1554   | C   | C   | . GLY GLY GLY A A 207 207 . | 0.3311 | 0.3671 | 0.3350 | -0.0022 | 0.0043  | - |
| 0.0021 | 1   | .   |                             |        |        |        |         |         |   |
| 1555   | O   | O   | . GLY GLY GLY A A 207 207 . | 0.3281 | 0.3622 | 0.3127 | 0.0124  | 0.0236  |   |
| 0.0029 | 1   | .   |                             |        |        |        |         |         |   |
| 1556   | N   | N   | . ASP ASP ASP A A 208 208 . | 0.3184 | 0.3527 | 0.3228 | -0.0011 | 0.0058  | - |
| 0.0066 | 1   | .   |                             |        |        |        |         |         |   |
| 1557   | CA  | CA  | . ASP ASP ASP A A 208 208 . | 0.3493 | 0.3595 | 0.3446 | 0.0088  | 0.0152  | - |
| 0.0103 | 1   | .   |                             |        |        |        |         |         |   |
| 1558   | CB  | CB  | . ASP ASP ASP A A 208 208 . | 0.3463 | 0.3718 | 0.3505 | 0.0314  | 0.0198  | - |
| 0.0109 | 1   | .   |                             |        |        |        |         |         |   |
| 1559   | CG  | CG  | . ASP ASP ASP A A 208 208 . | 0.3324 | 0.3936 | 0.4037 | 0.0054  | 0.0379  | - |
| 0.0052 | 1   | .   |                             |        |        |        |         |         |   |
| 1560   | OD1 | OD1 | . ASP ASP ASP A A 208 208 . | 0.2567 | 0.4208 | 0.4289 | 0.0161  | 0.0458  | - |
| 0.0129 | 1   | .   |                             |        |        |        |         |         |   |
| 1561   | OD2 | OD2 | . ASP ASP ASP A A 208 208 . | 0.2599 | 0.3979 | 0.4724 | -0.0162 | 0.0701  |   |
| 0.0086 | 1   | .   |                             |        |        |        |         |         |   |
| 1562   | C   | C   | . ASP ASP ASP A A 208 208 . | 0.3299 | 0.3493 | 0.3432 | 0.0110  | 0.0118  | - |
| 0.0161 | 1   | .   |                             |        |        |        |         |         |   |
| 1563   | O   | O   | . ASP ASP ASP A A 208 208 . | 0.3442 | 0.3361 | 0.3361 | 0.0184  | 0.0300  | - |
| 0.0170 | 1   | .   |                             |        |        |        |         |         |   |
| 1564   | N   | N   | . GLU GLU GLU A A 209 209 . | 0.3449 | 0.3661 | 0.3433 | 0.0064  | 0.0067  | - |
| 0.0151 | 1   | .   |                             |        |        |        |         |         |   |
| 1565   | CA  | CA  | . GLU GLU GLU A A 209 209 . | 0.3707 | 0.3738 | 0.3533 | 0.0047  | 0.0002  | - |
| 0.0087 | 1   | .   |                             |        |        |        |         |         |   |
| 1566   | CB  | CB  | . GLU GLU GLU A A 209 209 . | 0.3878 | 0.3721 | 0.3500 | 0.0059  | 0.0005  | - |
| 0.0110 | 1   | .   |                             |        |        |        |         |         |   |
| 1567   | CG  | CG  | . GLU GLU GLU A A 209 209 . | 0.4437 | 0.3600 | 0.3717 | 0.0375  | -0.0087 | - |
| 0.0195 | 1   | .   |                             |        |        |        |         |         |   |
| 1568   | CD  | CD  | . GLU GLU GLU A A 209 209 . | 0.5330 | 0.3875 | 0.4087 | 0.0349  | -0.0149 | - |
| 0.0163 | 1   | .   |                             |        |        |        |         |         |   |
| 1569   | OE1 | OE1 | . GLU GLU GLU A A 209 209 . | 0.5695 | 0.3896 | 0.3866 | 0.0547  | -0.0546 | - |
| 0.0488 | 1   | .   |                             |        |        |        |         |         |   |
| 1570   | OE2 | OE2 | . GLU GLU GLU A A 209 209 . | 0.6010 | 0.3530 | 0.4162 | 0.0065  | -0.0459 | - |
| 0.0212 | 1   | .   |                             |        |        |        |         |         |   |
| 1571   | C   | C   | . GLU GLU GLU A A 209 209 . | 0.3721 | 0.3774 | 0.3532 | 0.0042  | 0.0004  | - |
| 0.0022 | 1   | .   |                             |        |        |        |         |         |   |
| 1572   | O   | O   | . GLU GLU GLU A A 209 209 . | 0.3638 | 0.4104 | 0.3578 | -0.0019 | 0.0110  | - |
| 0.0025 | 1   | .   |                             |        |        |        |         |         |   |

|        |     |     |                             |        |        |        |         |         |   |
|--------|-----|-----|-----------------------------|--------|--------|--------|---------|---------|---|
| 1573   | N   | N   | . GLY GLY GLY A A 210 210 . | 0.3670 | 0.3816 | 0.3494 | -0.0012 | 0.0123  | - |
| 0.0013 | 1   | .   |                             |        |        |        |         |         |   |
| 1574   | CA  | CA  | . GLY GLY GLY A A 210 210 . | 0.3765 | 0.3646 | 0.3375 | -0.0012 | 0.0029  |   |
| 0.0054 | 1   | .   |                             |        |        |        |         |         |   |
| 1575   | C   | C   | . GLY GLY GLY A A 210 210 . | 0.3505 | 0.3632 | 0.3465 | -0.0125 | 0.0160  |   |
| 0.0110 | 1   | .   |                             |        |        |        |         |         |   |
| 1576   | O   | O   | . GLY GLY GLY A A 210 210 . | 0.3277 | 0.3837 | 0.3507 | -0.0035 | 0.0294  | - |
| 0.0089 | 1   | .   |                             |        |        |        |         |         |   |
| 1577   | N   | N   | . GLY GLY GLY A A 211 211 . | 0.3532 | 0.3748 | 0.3520 | -0.0176 | 0.0110  |   |
| 0.0096 | 1   | .   |                             |        |        |        |         |         |   |
| 1578   | CA  | CA  | . GLY GLY GLY A A 211 211 . | 0.3680 | 0.3750 | 0.3635 | -0.0121 | 0.0092  | - |
| 0.0026 | 1   | .   |                             |        |        |        |         |         |   |
| 1579   | C   | C   | . GLY GLY GLY A A 211 211 . | 0.3561 | 0.3861 | 0.3763 | -0.0091 | 0.0033  | - |
| 0.0099 | 1   | .   |                             |        |        |        |         |         |   |
| 1580   | O   | O   | . GLY GLY GLY A A 211 211 . | 0.3668 | 0.4163 | 0.3954 | -0.0014 | -0.0021 | - |
| 0.0141 | 1   | .   |                             |        |        |        |         |         |   |
| 1581   | N   | N   | . PHE PHE PHE A A 212 212 . | 0.3659 | 0.3683 | 0.3749 | -0.0004 | 0.0017  |   |
| 0.0005 | 1   | .   |                             |        |        |        |         |         |   |
| 1582   | CA  | CA  | . PHE PHE PHE A A 212 212 . | 0.3520 | 0.3685 | 0.3844 | -0.0011 | 0.0066  | - |
| 0.0051 | 1   | .   |                             |        |        |        |         |         |   |
| 1583   | CB  | CB  | . PHE PHE PHE A A 212 212 . | 0.3400 | 0.3542 | 0.3705 | -0.0065 | 0.0121  | - |
| 0.0048 | 1   | .   |                             |        |        |        |         |         |   |
| 1584   | CG  | CG  | . PHE PHE PHE A A 212 212 . | 0.3268 | 0.3085 | 0.3654 | -0.0180 | 0.0047  | - |
| 0.0070 | 1   | .   |                             |        |        |        |         |         |   |
| 1585   | CD1 | CD1 | . PHE PHE PHE A A 212 212 . | 0.2851 | 0.2799 | 0.3528 | -0.0342 | 0.0142  |   |
| 0.0044 | 1   | .   |                             |        |        |        |         |         |   |
| 1586   | CE1 | CE1 | . PHE PHE PHE A A 212 212 . | 0.3296 | 0.3431 | 0.3732 | -0.0014 | -0.0170 |   |
| 0.0306 | 1   | .   |                             |        |        |        |         |         |   |
| 1587   | CZ  | CZ  | . PHE PHE PHE A A 212 212 . | 0.2168 | 0.3902 | 0.3544 | -0.0322 | -0.0021 | - |
| 0.0423 | 1   | .   |                             |        |        |        |         |         |   |
| 1588   | CE2 | CE2 | . PHE PHE PHE A A 212 212 . | 0.3435 | 0.3682 | 0.3829 | 0.0103  | -0.0139 | - |
| 0.0497 | 1   | .   |                             |        |        |        |         |         |   |
| 1589   | CD2 | CD2 | . PHE PHE PHE A A 212 212 . | 0.3035 | 0.3068 | 0.3715 | -0.0022 | -0.0010 | - |
| 0.0440 | 1   | .   |                             |        |        |        |         |         |   |
| 1590   | C   | C   | . PHE PHE PHE A A 212 212 . | 0.3621 | 0.3841 | 0.3930 | -0.0007 | -0.0070 | - |
| 0.0010 | 1   | .   |                             |        |        |        |         |         |   |
| 1591   | O   | O   | . PHE PHE PHE A A 212 212 . | 0.3613 | 0.4131 | 0.3961 | 0.0039  | -0.0257 | - |
| 0.0108 | 1   | .   |                             |        |        |        |         |         |   |
| 1592   | N   | N   | . ALA ALA ALA A A 213 213 . | 0.3419 | 0.3889 | 0.4017 | -0.0052 | 0.0014  | - |
| 0.0099 | 1   | .   |                             |        |        |        |         |         |   |
| 1593   | CA  | CA  | . ALA ALA ALA A A 213 213 . | 0.3859 | 0.4094 | 0.4192 | -0.0040 | 0.0028  | - |
| 0.0024 | 1   | .   |                             |        |        |        |         |         |   |
| 1594   | CB  | CB  | . ALA ALA ALA A A 213 213 . | 0.3909 | 0.4265 | 0.4265 | -0.0106 | -0.0065 | - |
| 0.0149 | 1   | .   |                             |        |        |        |         |         |   |
| 1595   | C   | C   | . ALA ALA ALA A A 213 213 . | 0.3598 | 0.4189 | 0.4221 | -0.0032 | -0.0007 | - |
| 0.0008 | 1   | .   |                             |        |        |        |         |         |   |
| 1596   | O   | O   | . ALA ALA ALA A A 213 213 . | 0.3461 | 0.4456 | 0.4259 | 0.0019  | 0.0019  |   |
| 0.0084 | 1   | .   |                             |        |        |        |         |         |   |
| 1597   | N   | N   | . PRO PRO PRO A A 214 214 . | 0.3631 | 0.4115 | 0.4141 | 0.0018  | -0.0005 | - |
| 0.0004 | 1   | .   |                             |        |        |        |         |         |   |
| 1598   | CA  | CA  | . PRO PRO PRO A A 214 214 . | 0.3846 | 0.4273 | 0.4316 | 0.0034  | 0.0032  |   |
| 0.0065 | 1   | .   |                             |        |        |        |         |         |   |
| 1599   | CB  | CB  | . PRO PRO PRO A A 214 214 . | 0.3462 | 0.4075 | 0.4209 | 0.0103  | -0.0043 |   |
| 0.0028 | 1   | .   |                             |        |        |        |         |         |   |
| 1600   | CG  | CG  | . PRO PRO PRO A A 214 214 . | 0.3507 | 0.4252 | 0.4130 | 0.0013  | -0.0032 |   |
| 0.0032 | 1   | .   |                             |        |        |        |         |         |   |
| 1601   | CD  | CD  | . PRO PRO PRO A A 214 214 . | 0.3766 | 0.4065 | 0.4156 | -0.0030 | 0.0116  |   |
| 0.0077 | 1   | .   |                             |        |        |        |         |         |   |
| 1602   | C   | C   | . PRO PRO PRO A A 214 214 . | 0.4041 | 0.4377 | 0.4557 | 0.0061  | 0.0071  |   |
| 0.0096 | 1   | .   |                             |        |        |        |         |         |   |

|        |     |     |                             |        |        |        |         |         |   |
|--------|-----|-----|-----------------------------|--------|--------|--------|---------|---------|---|
| 1603   | O   | O   | . PRO PRO PRO A A 214 214 . | 0.3758 | 0.4299 | 0.4688 | 0.0014  | 0.0162  |   |
| 0.0219 | 1   | .   |                             |        |        |        |         |         |   |
| 1604   | N   | N   | . ASN ASN ASN A A 215 215 . | 0.4603 | 0.4803 | 0.4839 | 0.0007  | 0.0078  |   |
| 0.0122 | 1   | .   |                             |        |        |        |         |         |   |
| 1605   | CA  | CA  | . ASN ASN ASN A A 215 215 . | 0.4961 | 0.5099 | 0.5208 | -0.0004 | 0.0017  |   |
| 0.0075 | 1   | .   |                             |        |        |        |         |         |   |
| 1606   | CB  | CB  | . ASN ASN ASN A A 215 215 . | 0.5226 | 0.5418 | 0.5274 | 0.0002  | -0.0063 |   |
| 0.0134 | 1   | .   |                             |        |        |        |         |         |   |
| 1607   | CG  | CG  | . ASN ASN ASN A A 215 215 . | 0.5970 | 0.5673 | 0.6069 | -0.0112 | -0.0384 |   |
| 0.0213 | 1   | .   |                             |        |        |        |         |         |   |
| 1608   | OD1 | OD1 | . ASN ASN ASN A A 215 215 . | 0.6872 | 0.6457 | 0.6377 | -0.0538 | -0.1119 |   |
| 0.0005 | 1   | .   |                             |        |        |        |         |         |   |
| 1609   | ND2 | ND2 | . ASN ASN ASN A A 215 215 . | 0.6193 | 0.6231 | 0.6510 | 0.0039  | -0.0466 |   |
| 0.0449 | 1   | .   |                             |        |        |        |         |         |   |
| 1610   | C   | C   | . ASN ASN ASN A A 215 215 . | 0.5037 | 0.5184 | 0.5193 | -0.0035 | 0.0070  |   |
| 0.0020 | 1   | .   |                             |        |        |        |         |         |   |
| 1611   | O   | O   | . ASN ASN ASN A A 215 215 . | 0.5131 | 0.5193 | 0.5411 | -0.0053 | 0.0160  | - |
| 0.0035 | 1   | .   |                             |        |        |        |         |         |   |
| 1612   | N   | N   | . ILE ILE ILE A A 216 216 . | 0.5052 | 0.5218 | 0.5203 | -0.0082 | 0.0070  |   |
| 0.0010 | 1   | .   |                             |        |        |        |         |         |   |
| 1613   | CA  | CA  | . ILE ILE ILE A A 216 216 . | 0.4913 | 0.5234 | 0.5267 | -0.0080 | 0.0046  | - |
| 0.0031 | 1   | .   |                             |        |        |        |         |         |   |
| 1614   | CB  | CB  | . ILE ILE ILE A A 216 216 . | 0.4811 | 0.5103 | 0.5119 | -0.0143 | 0.0013  | - |
| 0.0107 | 1   | .   |                             |        |        |        |         |         |   |
| 1615   | CG1 | CG1 | . ILE ILE ILE A A 216 216 . | 0.4930 | 0.5081 | 0.5136 | -0.0092 | 0.0224  | - |
| 0.0079 | 1   | .   |                             |        |        |        |         |         |   |
| 1616   | CD1 | CD1 | . ILE ILE ILE A A 216 216 . | 0.4988 | 0.5149 | 0.5152 | -0.0443 | 0.0006  | - |
| 0.0283 | 1   | .   |                             |        |        |        |         |         |   |
| 1617   | CG2 | CG2 | . ILE ILE ILE A A 216 216 . | 0.4164 | 0.5135 | 0.5210 | -0.0223 | -0.0255 | - |
| 0.0208 | 1   | .   |                             |        |        |        |         |         |   |
| 1618   | C   | C   | . ILE ILE ILE A A 216 216 . | 0.5029 | 0.5313 | 0.5279 | -0.0036 | 0.0082  |   |
| 0.0016 | 1   | .   |                             |        |        |        |         |         |   |
| 1619   | O   | O   | . ILE ILE ILE A A 216 216 . | 0.5036 | 0.5346 | 0.5441 | -0.0009 | 0.0182  |   |
| 0.0046 | 1   | .   |                             |        |        |        |         |         |   |
| 1620   | N   | N   | . LEU LEU LEU A A 217 217 . | 0.5162 | 0.5443 | 0.5306 | -0.0003 | 0.0080  |   |
| 0.0023 | 1   | .   |                             |        |        |        |         |         |   |
| 1621   | CA  | CA  | . LEU LEU LEU A A 217 217 . | 0.5204 | 0.5370 | 0.5348 | 0.0005  | 0.0076  |   |
| 0.0050 | 1   | .   |                             |        |        |        |         |         |   |
| 1622   | CB  | CB  | . LEU LEU LEU A A 217 217 . | 0.5189 | 0.5357 | 0.5364 | -0.0028 | 0.0087  |   |
| 0.0035 | 1   | .   |                             |        |        |        |         |         |   |
| 1623   | CG  | CG  | . LEU LEU LEU A A 217 217 . | 0.5416 | 0.5688 | 0.5736 | 0.0000  | 0.0030  |   |
| 0.0214 | 1   | .   |                             |        |        |        |         |         |   |
| 1624   | CD1 | CD1 | . LEU LEU LEU A A 217 217 . | 0.5932 | 0.5502 | 0.5830 | 0.0113  | 0.0056  |   |
| 0.0474 | 1   | .   |                             |        |        |        |         |         |   |
| 1625   | CD2 | CD2 | . LEU LEU LEU A A 217 217 . | 0.5362 | 0.6350 | 0.6328 | 0.0072  | -0.0044 |   |
| 0.0297 | 1   | .   |                             |        |        |        |         |         |   |
| 1626   | C   | C   | . LEU LEU LEU A A 217 217 . | 0.5130 | 0.5340 | 0.5270 | -0.0042 | 0.0118  |   |
| 0.0012 | 1   | .   |                             |        |        |        |         |         |   |
| 1627   | O   | O   | . LEU LEU LEU A A 217 217 . | 0.5366 | 0.5460 | 0.5349 | -0.0001 | 0.0065  |   |
| 0.0016 | 1   | .   |                             |        |        |        |         |         |   |
| 1628   | N   | N   | . GLU GLU GLU A A 218 218 . | 0.4941 | 0.5312 | 0.5267 | -0.0050 | 0.0158  | - |
| 0.0013 | 1   | .   |                             |        |        |        |         |         |   |
| 1629   | CA  | CA  | . GLU GLU GLU A A 218 218 . | 0.4915 | 0.5335 | 0.5160 | -0.0107 | 0.0151  |   |
| 0.0099 | 1   | .   |                             |        |        |        |         |         |   |
| 1630   | CB  | CB  | . GLU GLU GLU A A 218 218 . | 0.4957 | 0.5437 | 0.5171 | -0.0158 | 0.0135  |   |
| 0.0044 | 1   | .   |                             |        |        |        |         |         |   |
| 1631   | CG  | CG  | . GLU GLU GLU A A 218 218 . | 0.5572 | 0.6346 | 0.5943 | -0.0239 | 0.0160  |   |
| 0.0340 | 1   | .   |                             |        |        |        |         |         |   |
| 1632   | CD  | CD  | . GLU GLU GLU A A 218 218 . | 0.6319 | 0.7233 | 0.6686 | -0.0228 | -0.0052 |   |
| 0.0593 | 1   | .   |                             |        |        |        |         |         |   |



|        |     |     |                             |        |        |        |         |         |   |
|--------|-----|-----|-----------------------------|--------|--------|--------|---------|---------|---|
| 1663   | C   | C   | . ALA ALA ALA A A 222 222 . | 0.4607 | 0.4920 | 0.4747 | -0.0137 | -0.0102 |   |
| 0.0052 | 1   | .   |                             |        |        |        |         |         |   |
| 1664   | O   | O   | . ALA ALA ALA A A 222 222 . | 0.4610 | 0.5007 | 0.4711 | -0.0115 | -0.0246 |   |
| 0.0153 | 1   | .   |                             |        |        |        |         |         |   |
| 1665   | N   | N   | . LEU LEU LEU A A 223 223 . | 0.4765 | 0.4875 | 0.4715 | -0.0087 | -0.0062 |   |
| 0.0042 | 1   | .   |                             |        |        |        |         |         |   |
| 1666   | CA  | CA  | . LEU LEU LEU A A 223 223 . | 0.4806 | 0.4790 | 0.4732 | -0.0035 | 0.0012  | - |
| 0.0050 | 1   | .   |                             |        |        |        |         |         |   |
| 1667   | CB  | CB  | . LEU LEU LEU A A 223 223 . | 0.4831 | 0.4745 | 0.4627 | 0.0000  | 0.0016  | - |
| 0.0034 | 1   | .   |                             |        |        |        |         |         |   |
| 1668   | CG  | CG  | . LEU LEU LEU A A 223 223 . | 0.4785 | 0.4870 | 0.4739 | -0.0122 | -0.0140 |   |
| 0.0048 | 1   | .   |                             |        |        |        |         |         |   |
| 1669   | CD1 | CD1 | . LEU LEU LEU A A 223 223 . | 0.4606 | 0.4755 | 0.5267 | 0.0119  | -0.0022 |   |
| 0.0133 | 1   | .   |                             |        |        |        |         |         |   |
| 1670   | CD2 | CD2 | . LEU LEU LEU A A 223 223 . | 0.4917 | 0.4778 | 0.4838 | 0.0248  | 0.0208  |   |
| 0.0326 | 1   | .   |                             |        |        |        |         |         |   |
| 1671   | C   | C   | . LEU LEU LEU A A 223 223 . | 0.4804 | 0.4774 | 0.4808 | -0.0013 | 0.0053  | - |
| 0.0058 | 1   | .   |                             |        |        |        |         |         |   |
| 1672   | O   | O   | . LEU LEU LEU A A 223 223 . | 0.4971 | 0.4796 | 0.4726 | -0.0090 | 0.0215  | - |
| 0.0204 | 1   | .   |                             |        |        |        |         |         |   |
| 1673   | N   | N   | . GLU GLU GLU A A 224 224 . | 0.4666 | 0.4784 | 0.4875 | -0.0035 | 0.0056  | - |
| 0.0111 | 1   | .   |                             |        |        |        |         |         |   |
| 1674   | CA  | CA  | . GLU GLU GLU A A 224 224 . | 0.4677 | 0.4875 | 0.4953 | 0.0069  | -0.0074 | - |
| 0.0006 | 1   | .   |                             |        |        |        |         |         |   |
| 1675   | CB  | CB  | . GLU GLU GLU A A 224 224 . | 0.4926 | 0.4984 | 0.4931 | 0.0053  | 0.0012  | - |
| 0.0009 | 1   | .   |                             |        |        |        |         |         |   |
| 1676   | CG  | CG  | . GLU GLU GLU A A 224 224 . | 0.5670 | 0.5323 | 0.5607 | 0.0077  | -0.0126 | - |
| 0.0137 | 1   | .   |                             |        |        |        |         |         |   |
| 1677   | CD  | CD  | . GLU GLU GLU A A 224 224 . | 0.6548 | 0.6233 | 0.6152 | 0.0424  | -0.0304 | - |
| 0.0524 | 1   | .   |                             |        |        |        |         |         |   |
| 1678   | OE1 | OE1 | . GLU GLU GLU A A 224 224 . | 0.7212 | 0.5978 | 0.6866 | 0.0831  | -0.0591 | - |
| 0.0510 | 1   | .   |                             |        |        |        |         |         |   |
| 1679   | OE2 | OE2 | . GLU GLU GLU A A 224 224 . | 0.6660 | 0.6908 | 0.6308 | 0.0433  | -0.0677 | - |
| 0.0748 | 1   | .   |                             |        |        |        |         |         |   |
| 1680   | C   | C   | . GLU GLU GLU A A 224 224 . | 0.4543 | 0.4903 | 0.4892 | -0.0002 | -0.0071 | - |
| 0.0036 | 1   | .   |                             |        |        |        |         |         |   |
| 1681   | O   | O   | . GLU GLU GLU A A 224 224 . | 0.4001 | 0.4971 | 0.5094 | 0.0204  | -0.0176 |   |
| 0.0167 | 1   | .   |                             |        |        |        |         |         |   |
| 1682   | N   | N   | . LEU LEU LEU A A 225 225 . | 0.4371 | 0.4874 | 0.4681 | -0.0018 | -0.0013 |   |
| 0.0012 | 1   | .   |                             |        |        |        |         |         |   |
| 1683   | CA  | CA  | . LEU LEU LEU A A 225 225 . | 0.4491 | 0.4709 | 0.4613 | -0.0103 | 0.0044  | - |
| 0.0078 | 1   | .   |                             |        |        |        |         |         |   |
| 1684   | CB  | CB  | . LEU LEU LEU A A 225 225 . | 0.4390 | 0.4694 | 0.4494 | -0.0025 | 0.0171  | - |
| 0.0076 | 1   | .   |                             |        |        |        |         |         |   |
| 1685   | CG  | CG  | . LEU LEU LEU A A 225 225 . | 0.4604 | 0.4571 | 0.4617 | 0.0010  | 0.0271  | - |
| 0.0090 | 1   | .   |                             |        |        |        |         |         |   |
| 1686   | CD1 | CD1 | . LEU LEU LEU A A 225 225 . | 0.4018 | 0.4695 | 0.4467 | 0.0466  | 0.0775  | - |
| 0.0126 | 1   | .   |                             |        |        |        |         |         |   |
| 1687   | CD2 | CD2 | . LEU LEU LEU A A 225 225 . | 0.3964 | 0.4680 | 0.4527 | -0.0224 | 0.0241  |   |
| 0.0102 | 1   | .   |                             |        |        |        |         |         |   |
| 1688   | C   | C   | . LEU LEU LEU A A 225 225 . | 0.4359 | 0.4551 | 0.4498 | -0.0073 | 0.0044  | - |
| 0.0136 | 1   | .   |                             |        |        |        |         |         |   |
| 1689   | O   | O   | . LEU LEU LEU A A 225 225 . | 0.4559 | 0.4450 | 0.4555 | -0.0169 | 0.0041  | - |
| 0.0290 | 1   | .   |                             |        |        |        |         |         |   |
| 1690   | N   | N   | . VAL VAL VAL A A 226 226 . | 0.4336 | 0.4553 | 0.4454 | -0.0101 | 0.0057  | - |
| 0.0131 | 1   | .   |                             |        |        |        |         |         |   |
| 1691   | CA  | CA  | . VAL VAL VAL A A 226 226 . | 0.4335 | 0.4520 | 0.4497 | -0.0123 | 0.0006  | - |
| 0.0150 | 1   | .   |                             |        |        |        |         |         |   |
| 1692   | CB  | CB  | . VAL VAL VAL A A 226 226 . | 0.4335 | 0.4465 | 0.4517 | -0.0111 | 0.0056  | - |
| 0.0168 | 1   | .   |                             |        |        |        |         |         |   |







|        |     |     |                             |        |        |        |         |         |   |
|--------|-----|-----|-----------------------------|--------|--------|--------|---------|---------|---|
| 1753   | O   | O   | . GLY GLY GLY A A 234 234 . | 0.4208 | 0.4217 | 0.4427 | 0.0176  | -0.0089 | - |
| 0.0204 | 1   | .   |                             |        |        |        |         |         |   |
| 1754   | N   | N   | . TYR TYR TYR A A 235 235 . | 0.4229 | 0.4310 | 0.4429 | 0.0021  | -0.0037 | - |
| 0.0092 | 1   | .   |                             |        |        |        |         |         |   |
| 1755   | CA  | CA  | . TYR TYR TYR A A 235 235 . | 0.4284 | 0.4307 | 0.4350 | -0.0008 | -0.0103 | - |
| 0.0080 | 1   | .   |                             |        |        |        |         |         |   |
| 1756   | CB  | CB  | . TYR TYR TYR A A 235 235 . | 0.4427 | 0.4218 | 0.4285 | 0.0040  | -0.0224 | - |
| 0.0059 | 1   | .   |                             |        |        |        |         |         |   |
| 1757   | CG  | CG  | . TYR TYR TYR A A 235 235 . | 0.4163 | 0.4139 | 0.4204 | -0.0202 | -0.0257 | - |
| 0.0102 | 1   | .   |                             |        |        |        |         |         |   |
| 1758   | CD1 | CD1 | . TYR TYR TYR A A 235 235 . | 0.4528 | 0.4393 | 0.4247 | -0.0079 | -0.0376 | - |
| 0.0189 | 1   | .   |                             |        |        |        |         |         |   |
| 1759   | CE1 | CE1 | . TYR TYR TYR A A 235 235 . | 0.4639 | 0.4325 | 0.4032 | 0.0029  | -0.0186 | - |
| 0.0122 | 1   | .   |                             |        |        |        |         |         |   |
| 1760   | CZ  | CZ  | . TYR TYR TYR A A 235 235 . | 0.4596 | 0.3893 | 0.3940 | 0.0104  | -0.0049 | - |
| 0.0106 | 1   | .   |                             |        |        |        |         |         |   |
| 1761   | OH  | OH  | . TYR TYR TYR A A 235 235 . | 0.5098 | 0.4203 | 0.3262 | 0.0059  | 0.0357  |   |
| 0.0330 | 1   | .   |                             |        |        |        |         |         |   |
| 1762   | CE2 | CE2 | . TYR TYR TYR A A 235 235 . | 0.5035 | 0.3600 | 0.3984 | 0.0126  | -0.0434 | - |
| 0.0137 | 1   | .   |                             |        |        |        |         |         |   |
| 1763   | CD2 | CD2 | . TYR TYR TYR A A 235 235 . | 0.4307 | 0.3515 | 0.3826 | 0.0000  | -0.0295 | - |
| 0.0509 | 1   | .   |                             |        |        |        |         |         |   |
| 1764   | C   | C   | . TYR TYR TYR A A 235 235 . | 0.4366 | 0.4496 | 0.4380 | 0.0014  | -0.0015 | - |
| 0.0132 | 1   | .   |                             |        |        |        |         |         |   |
| 1765   | O   | O   | . TYR TYR TYR A A 235 235 . | 0.4030 | 0.4515 | 0.4138 | -0.0013 | 0.0056  | - |
| 0.0193 | 1   | .   |                             |        |        |        |         |         |   |
| 1766   | N   | N   | . THR THR THR A A 236 236 . | 0.4610 | 0.4715 | 0.4711 | -0.0052 | -0.0024 | - |
| 0.0102 | 1   | .   |                             |        |        |        |         |         |   |
| 1767   | CA  | CA  | . THR THR THR A A 236 236 . | 0.4999 | 0.5075 | 0.5108 | -0.0106 | -0.0090 | - |
| 0.0040 | 1   | .   |                             |        |        |        |         |         |   |
| 1768   | CB  | CB  | . THR THR THR A A 236 236 . | 0.5024 | 0.5033 | 0.5166 | -0.0119 | -0.0052 | - |
| 0.0068 | 1   | .   |                             |        |        |        |         |         |   |
| 1769   | OG1 | OG1 | . THR THR THR A A 236 236 . | 0.5484 | 0.5194 | 0.5287 | -0.0303 | 0.0191  |   |
| 0.0229 | 1   | .   |                             |        |        |        |         |         |   |
| 1770   | CG2 | CG2 | . THR THR THR A A 236 236 . | 0.4795 | 0.5304 | 0.5260 | -0.0190 | -0.0198 | - |
| 0.0167 | 1   | .   |                             |        |        |        |         |         |   |
| 1771   | C   | C   | . THR THR THR A A 236 236 . | 0.5161 | 0.5205 | 0.5091 | -0.0086 | -0.0091 | - |
| 0.0005 | 1   | .   |                             |        |        |        |         |         |   |
| 1772   | O   | O   | . THR THR THR A A 236 236 . | 0.5274 | 0.5243 | 0.5268 | -0.0149 | -0.0185 | - |
| 0.0064 | 1   | .   |                             |        |        |        |         |         |   |
| 1773   | N   | N   | . GLU GLU GLU A A 237 237 . | 0.5311 | 0.5464 | 0.5204 | -0.0111 | -0.0058 | - |
| 0.0079 | 1   | .   |                             |        |        |        |         |         |   |
| 1774   | CA  | CA  | . GLU GLU GLU A A 237 237 . | 0.5605 | 0.5573 | 0.5455 | -0.0195 | 0.0030  | - |
| 0.0032 | 1   | .   |                             |        |        |        |         |         |   |
| 1775   | CB  | CB  | . GLU GLU GLU A A 237 237 . | 0.5846 | 0.5846 | 0.5676 | -0.0168 | 0.0090  | - |
| 0.0066 | 1   | .   |                             |        |        |        |         |         |   |
| 1776   | CG  | CG  | . GLU GLU GLU A A 237 237 . | 0.6468 | 0.6441 | 0.6411 | -0.0429 | 0.0219  | - |
| 0.0052 | 1   | .   |                             |        |        |        |         |         |   |
| 1777   | CD  | CD  | . GLU GLU GLU A A 237 237 . | 0.7329 | 0.8087 | 0.6925 | -0.0567 | 0.0156  | - |
| 0.0128 | 1   | .   |                             |        |        |        |         |         |   |
| 1778   | OE1 | OE1 | . GLU GLU GLU A A 237 237 . | 0.7525 | 0.8407 | 0.7308 | -0.0446 | 0.0640  | - |
| 0.0179 | 1   | .   |                             |        |        |        |         |         |   |
| 1779   | OE2 | OE2 | . GLU GLU GLU A A 237 237 . | 0.7992 | 0.8711 | 0.7174 | -0.0923 | 0.0774  | - |
| 0.0078 | 1   | .   |                             |        |        |        |         |         |   |
| 1780   | C   | C   | . GLU GLU GLU A A 237 237 . | 0.5665 | 0.5440 | 0.5265 | -0.0121 | -0.0004 | - |
| 0.0028 | 1   | .   |                             |        |        |        |         |         |   |
| 1781   | O   | O   | . GLU GLU GLU A A 237 237 . | 0.5908 | 0.5609 | 0.5266 | -0.0206 | -0.0025 | - |
| 0.0088 | 1   | .   |                             |        |        |        |         |         |   |
| 1782   | N   | N   | . LYS LYS LYS A A 238 238 . | 0.5323 | 0.5147 | 0.4985 | -0.0095 | 0.0047  | - |
| 0.0092 | 1   | .   |                             |        |        |        |         |         |   |



|        |     |     |                             |        |        |        |         |         |   |
|--------|-----|-----|-----------------------------|--------|--------|--------|---------|---------|---|
| 1813   | O   | O   | . ILE ILE ILE A A 241 241 . | 0.4158 | 0.4182 | 0.4177 | -0.0100 | 0.0070  | - |
| 0.0138 | 1   | .   |                             |        |        |        |         |         |   |
| 1814   | N   | N   | . GLY GLY GLY A A 242 242 . | 0.3991 | 0.4207 | 0.4130 | -0.0002 | 0.0077  | - |
| 0.0089 | 1   | .   |                             |        |        |        |         |         |   |
| 1815   | CA  | CA  | . GLY GLY GLY A A 242 242 . | 0.3858 | 0.3996 | 0.4072 | 0.0020  | 0.0065  | - |
| 0.0048 | 1   | .   |                             |        |        |        |         |         |   |
| 1816   | C   | C   | . GLY GLY GLY A A 242 242 . | 0.3956 | 0.4107 | 0.4183 | -0.0073 | 0.0037  | - |
| 0.0050 | 1   | .   |                             |        |        |        |         |         |   |
| 1817   | O   | O   | . GLY GLY GLY A A 242 242 . | 0.3836 | 0.4015 | 0.4195 | -0.0210 | 0.0200  | - |
| 0.0052 | 1   | .   |                             |        |        |        |         |         |   |
| 1818   | N   | N   | . MET MET MET A A 243 243 . | 0.3662 | 0.4229 | 0.4280 | -0.0055 | -0.0004 | - |
| 0.0142 | 1   | .   |                             |        |        |        |         |         |   |
| 1819   | CA  | CA  | . MET MET MET A A 243 243 . | 0.3734 | 0.4264 | 0.4356 | -0.0097 | -0.0065 | - |
| 0.0157 | 1   | .   |                             |        |        |        |         |         |   |
| 1820   | CB  | CB  | . MET MET MET A A 243 243 . | 0.3525 | 0.4384 | 0.4303 | -0.0147 | -0.0162 | - |
| 0.0188 | 1   | .   |                             |        |        |        |         |         |   |
| 1821   | CG  | CG  | . MET MET MET A A 243 243 . | 0.3288 | 0.4444 | 0.4657 | -0.0395 | -0.0204 | - |
| 0.0435 | 1   | .   |                             |        |        |        |         |         |   |
| 1822   | SD  | SD  | . MET MET MET A A 243 243 . | 0.3918 | 0.5931 | 0.5816 | -0.0826 | -0.0233 | - |
| 0.0944 | 1   | .   |                             |        |        |        |         |         |   |
| 1823   | CE  | CE  | . MET MET MET A A 243 243 . | 0.1819 | 0.5640 | 0.6222 | -0.0803 | -0.0014 | - |
| 0.0652 | 1   | .   |                             |        |        |        |         |         |   |
| 1824   | C   | C   | . MET MET MET A A 243 243 . | 0.3792 | 0.4255 | 0.4335 | -0.0009 | -0.0060 | - |
| 0.0043 | 1   | .   |                             |        |        |        |         |         |   |
| 1825   | O   | O   | . MET MET MET A A 243 243 . | 0.3967 | 0.4279 | 0.4463 | 0.0017  | -0.0041 |   |
| 0.0090 | 1   | .   |                             |        |        |        |         |         |   |
| 1826   | N   | N   | . ASP ASP ASP A A 244 244 . | 0.3661 | 0.4192 | 0.4180 | 0.0015  | -0.0140 | - |
| 0.0111 | 1   | .   |                             |        |        |        |         |         |   |
| 1827   | CA  | CA  | . ASP ASP ASP A A 244 244 . | 0.3784 | 0.4135 | 0.4145 | 0.0059  | -0.0130 | - |
| 0.0019 | 1   | .   |                             |        |        |        |         |         |   |
| 1828   | CB  | CB  | . ASP ASP ASP A A 244 244 . | 0.3590 | 0.4067 | 0.4167 | 0.0070  | -0.0156 | - |
| 0.0016 | 1   | .   |                             |        |        |        |         |         |   |
| 1829   | CG  | CG  | . ASP ASP ASP A A 244 244 . | 0.3811 | 0.4441 | 0.4348 | -0.0008 | -0.0379 |   |
| 0.0078 | 1   | .   |                             |        |        |        |         |         |   |
| 1830   | OD1 | OD1 | . ASP ASP ASP A A 244 244 . | 0.3365 | 0.4653 | 0.4580 | -0.0368 | -0.0405 |   |
| 0.0421 | 1   | .   |                             |        |        |        |         |         |   |
| 1831   | OD2 | OD2 | . ASP ASP ASP A A 244 244 . | 0.3084 | 0.4854 | 0.4452 | -0.0269 | -0.0750 |   |
| 0.0016 | 1   | .   |                             |        |        |        |         |         |   |
| 1832   | C   | C   | . ASP ASP ASP A A 244 244 . | 0.3743 | 0.4060 | 0.4072 | 0.0108  | -0.0052 | - |
| 0.0019 | 1   | .   |                             |        |        |        |         |         |   |
| 1833   | O   | O   | . ASP ASP ASP A A 244 244 . | 0.3709 | 0.4246 | 0.4248 | 0.0231  | 0.0030  | - |
| 0.0175 | 1   | .   |                             |        |        |        |         |         |   |
| 1834   | N   | N   | . VAL VAL VAL A A 245 245 . | 0.3641 | 0.4067 | 0.4100 | -0.0006 | -0.0011 | - |
| 0.0021 | 1   | .   |                             |        |        |        |         |         |   |
| 1835   | CA  | CA  | . VAL VAL VAL A A 245 245 . | 0.3732 | 0.4024 | 0.4032 | 0.0052  | -0.0116 |   |
| 0.0000 | 1   | .   |                             |        |        |        |         |         |   |
| 1836   | CB  | CB  | . VAL VAL VAL A A 245 245 . | 0.3625 | 0.3980 | 0.3898 | -0.0048 | -0.0119 | - |
| 0.0042 | 1   | .   |                             |        |        |        |         |         |   |
| 1837   | CG1 | CG1 | . VAL VAL VAL A A 245 245 . | 0.3948 | 0.4113 | 0.3978 | 0.0083  | -0.0101 | - |
| 0.0082 | 1   | .   |                             |        |        |        |         |         |   |
| 1838   | CG2 | CG2 | . VAL VAL VAL A A 245 245 . | 0.3532 | 0.3551 | 0.4071 | 0.0017  | 0.0032  |   |
| 0.0169 | 1   | .   |                             |        |        |        |         |         |   |
| 1839   | C   | C   | . VAL VAL VAL A A 245 245 . | 0.3718 | 0.4156 | 0.3960 | -0.0039 | -0.0196 |   |
| 0.0026 | 1   | .   |                             |        |        |        |         |         |   |
| 1840   | O   | O   | . VAL VAL VAL A A 245 245 . | 0.3519 | 0.4243 | 0.3929 | -0.0215 | -0.0321 |   |
| 0.0160 | 1   | .   |                             |        |        |        |         |         |   |
| 1841   | N   | N   | . ALA ALA ALA A A 246 246 . | 0.3619 | 0.4253 | 0.4015 | -0.0005 | -0.0202 |   |
| 0.0008 | 1   | .   |                             |        |        |        |         |         |   |
| 1842   | CA  | CA  | . ALA ALA ALA A A 246 246 . | 0.3721 | 0.4177 | 0.4148 | 0.0068  | -0.0146 | - |
| 0.0089 | 1   | .   |                             |        |        |        |         |         |   |



|        |     |     |                             |        |        |        |         |         |   |
|--------|-----|-----|-----------------------------|--------|--------|--------|---------|---------|---|
| 1873   | CE2 | CE2 | . PHE PHE PHE A A 250 250 . | 0.4873 | 0.5107 | 0.4875 | 0.0404  | -0.0429 |   |
| 0.0035 | 1   | .   |                             |        |        |        |         |         |   |
| 1874   | CD2 | CD2 | . PHE PHE PHE A A 250 250 . | 0.4292 | 0.5019 | 0.5139 | 0.0623  | -0.0159 |   |
| 0.0058 | 1   | .   |                             |        |        |        |         |         |   |
| 1875   | C   | C   | . PHE PHE PHE A A 250 250 . | 0.5447 | 0.5649 | 0.5643 | 0.0117  | -0.0105 | - |
| 0.0006 | 1   | .   |                             |        |        |        |         |         |   |
| 1876   | O   | O   | . PHE PHE PHE A A 250 250 . | 0.5426 | 0.5542 | 0.5670 | 0.0246  | -0.0272 | - |
| 0.0022 | 1   | .   |                             |        |        |        |         |         |   |
| 1877   | N   | N   | . TYR TYR TYR A A 251 251 . | 0.5858 | 0.5893 | 0.5866 | 0.0080  | -0.0011 |   |
| 0.0020 | 1   | .   |                             |        |        |        |         |         |   |
| 1878   | CA  | CA  | . TYR TYR TYR A A 251 251 . | 0.6120 | 0.6166 | 0.6153 | 0.0047  | -0.0040 | - |
| 0.0012 | 1   | .   |                             |        |        |        |         |         |   |
| 1879   | CB  | CB  | . TYR TYR TYR A A 251 251 . | 0.6252 | 0.6192 | 0.6129 | 0.0009  | -0.0025 |   |
| 0.0014 | 1   | .   |                             |        |        |        |         |         |   |
| 1880   | CG  | CG  | . TYR TYR TYR A A 251 251 . | 0.6672 | 0.6663 | 0.6682 | 0.0124  | -0.0197 | - |
| 0.0027 | 1   | .   |                             |        |        |        |         |         |   |
| 1881   | CD1 | CD1 | . TYR TYR TYR A A 251 251 . | 0.6967 | 0.7030 | 0.6787 | 0.0124  | -0.0247 | - |
| 0.0090 | 1   | .   |                             |        |        |        |         |         |   |
| 1882   | CE1 | CE1 | . TYR TYR TYR A A 251 251 . | 0.6656 | 0.7055 | 0.6873 | 0.0221  | -0.0387 | - |
| 0.0136 | 1   | .   |                             |        |        |        |         |         |   |
| 1883   | CZ  | CZ  | . TYR TYR TYR A A 251 251 . | 0.6860 | 0.7091 | 0.7008 | 0.0087  | -0.0416 |   |
| 0.0069 | 1   | .   |                             |        |        |        |         |         |   |
| 1884   | OH  | OH  | . TYR TYR TYR A A 251 251 . | 0.7280 | 0.7421 | 0.7142 | -0.0176 | -0.0827 |   |
| 0.0134 | 1   | .   |                             |        |        |        |         |         |   |
| 1885   | CE2 | CE2 | . TYR TYR TYR A A 251 251 . | 0.6997 | 0.7110 | 0.6973 | 0.0125  | -0.0365 |   |
| 0.0056 | 1   | .   |                             |        |        |        |         |         |   |
| 1886   | CD2 | CD2 | . TYR TYR TYR A A 251 251 . | 0.7006 | 0.6775 | 0.7016 | 0.0105  | -0.0239 |   |
| 0.0001 | 1   | .   |                             |        |        |        |         |         |   |
| 1887   | C   | C   | . TYR TYR TYR A A 251 251 . | 0.6300 | 0.6298 | 0.6292 | -0.0001 | 0.0004  | - |
| 0.0018 | 1   | .   |                             |        |        |        |         |         |   |
| 1888   | O   | O   | . TYR TYR TYR A A 251 251 . | 0.6312 | 0.6300 | 0.6261 | -0.0097 | -0.0020 |   |
| 0.0034 | 1   | .   |                             |        |        |        |         |         |   |
| 1889   | N   | N   | . ARG ARG ARG A A 252 252 . | 0.6359 | 0.6499 | 0.6489 | -0.0030 | -0.0037 | - |
| 0.0046 | 1   | .   |                             |        |        |        |         |         |   |
| 1890   | CA  | CA  | . ARG ARG ARG A A 252 252 . | 0.6554 | 0.6692 | 0.6631 | 0.0030  | -0.0025 | - |
| 0.0063 | 1   | .   |                             |        |        |        |         |         |   |
| 1891   | CB  | CB  | . ARG ARG ARG A A 252 252 . | 0.6600 | 0.6701 | 0.6599 | 0.0064  | -0.0028 | - |
| 0.0083 | 1   | .   |                             |        |        |        |         |         |   |
| 1892   | CG  | CG  | . ARG ARG ARG A A 252 252 . | 0.6746 | 0.6728 | 0.6655 | 0.0136  | -0.0134 | - |
| 0.0105 | 1   | .   |                             |        |        |        |         |         |   |
| 1893   | CD  | CD  | . ARG ARG ARG A A 252 252 . | 0.6457 | 0.6753 | 0.6884 | 0.0148  | -0.0316 | - |
| 0.0233 | 1   | .   |                             |        |        |        |         |         |   |
| 1894   | NE  | NE  | . ARG ARG ARG A A 252 252 . | 0.6632 | 0.6730 | 0.7079 | 0.0272  | -0.0334 | - |
| 0.0104 | 1   | .   |                             |        |        |        |         |         |   |
| 1895   | CZ  | CZ  | . ARG ARG ARG A A 252 252 . | 0.6459 | 0.6776 | 0.7170 | 0.0298  | -0.0261 |   |
| 0.0051 | 1   | .   |                             |        |        |        |         |         |   |
| 1896   | NH1 | NH1 | . ARG ARG ARG A A 252 252 . | 0.5795 | 0.6612 | 0.7225 | 0.0313  | -0.0216 | - |
| 0.0084 | 1   | .   |                             |        |        |        |         |         |   |
| 1897   | NH2 | NH2 | . ARG ARG ARG A A 252 252 . | 0.6000 | 0.7019 | 0.7422 | 0.0261  | -0.0537 | - |
| 0.0037 | 1   | .   |                             |        |        |        |         |         |   |
| 1898   | C   | C   | . ARG ARG ARG A A 252 252 . | 0.6634 | 0.6850 | 0.6780 | 0.0057  | 0.0000  | - |
| 0.0028 | 1   | .   |                             |        |        |        |         |         |   |
| 1899   | O   | O   | . ARG ARG ARG A A 252 252 . | 0.6426 | 0.6953 | 0.6736 | 0.0121  | 0.0042  | - |
| 0.0044 | 1   | .   |                             |        |        |        |         |         |   |
| 1900   | N   | N   | . ASP ASP ASP A A 253 253 . | 0.6894 | 0.7026 | 0.7015 | 0.0015  | 0.0009  |   |
| 0.0000 | 1   | .   |                             |        |        |        |         |         |   |
| 1901   | CA  | CA  | . ASP ASP ASP A A 253 253 . | 0.7071 | 0.7241 | 0.7183 | -0.0002 | 0.0008  | - |
| 0.0002 | 1   | .   |                             |        |        |        |         |         |   |
| 1902   | CB  | CB  | . ASP ASP ASP A A 253 253 . | 0.7310 | 0.7384 | 0.7303 | -0.0071 | 0.0096  |   |
| 0.0041 | 1   | .   |                             |        |        |        |         |         |   |

|        |     |     |                             |        |        |        |         |         |   |
|--------|-----|-----|-----------------------------|--------|--------|--------|---------|---------|---|
| 1903   | CG  | CG  | . ASP ASP ASP A A 253 253 . | 0.7720 | 0.7471 | 0.7675 | -0.0220 | 0.0050  |   |
| 0.0040 | 1   | .   |                             |        |        |        |         |         |   |
| 1904   | OD1 | OD1 | . ASP ASP ASP A A 253 253 . | 0.8307 | 0.7482 | 0.7772 | -0.0290 | -0.0007 |   |
| 0.0081 | 1   | .   |                             |        |        |        |         |         |   |
| 1905   | OD2 | OD2 | . ASP ASP ASP A A 253 253 . | 0.8024 | 0.7872 | 0.7682 | -0.0242 | -0.0045 |   |
| 0.0008 | 1   | .   |                             |        |        |        |         |         |   |
| 1906   | C   | C   | . ASP ASP ASP A A 253 253 . | 0.6967 | 0.7218 | 0.7117 | -0.0007 | 0.0041  | - |
| 0.0020 | 1   | .   |                             |        |        |        |         |         |   |
| 1907   | O   | O   | . ASP ASP ASP A A 253 253 . | 0.6993 | 0.7380 | 0.7332 | -0.0004 | 0.0073  | - |
| 0.0006 | 1   | .   |                             |        |        |        |         |         |   |
| 1908   | N   | N   | . GLY GLY GLY A A 254 254 . | 0.6620 | 0.7004 | 0.6904 | -0.0011 | 0.0020  | - |
| 0.0011 | 1   | .   |                             |        |        |        |         |         |   |
| 1909   | CA  | CA  | . GLY GLY GLY A A 254 254 . | 0.6290 | 0.6678 | 0.6651 | 0.0036  | 0.0059  | - |
| 0.0005 | 1   | .   |                             |        |        |        |         |         |   |
| 1910   | C   | C   | . GLY GLY GLY A A 254 254 . | 0.6089 | 0.6514 | 0.6451 | 0.0042  | -0.0006 |   |
| 0.0023 | 1   | .   |                             |        |        |        |         |         |   |
| 1911   | O   | O   | . GLY GLY GLY A A 254 254 . | 0.5890 | 0.6496 | 0.6438 | 0.0112  | -0.0042 |   |
| 0.0034 | 1   | .   |                             |        |        |        |         |         |   |
| 1912   | N   | N   | . LYS LYS LYS A A 255 255 . | 0.5982 | 0.6333 | 0.6295 | -0.0011 | 0.0036  | - |
| 0.0045 | 1   | .   |                             |        |        |        |         |         |   |
| 1913   | CA  | CA  | . LYS LYS LYS A A 255 255 . | 0.5925 | 0.6215 | 0.6236 | -0.0012 | 0.0031  | - |
| 0.0009 | 1   | .   |                             |        |        |        |         |         |   |
| 1914   | CB  | CB  | . LYS LYS LYS A A 255 255 . | 0.6000 | 0.6249 | 0.6258 | -0.0018 | 0.0113  |   |
| 0.0063 | 1   | .   |                             |        |        |        |         |         |   |
| 1915   | CG  | CG  | . LYS LYS LYS A A 255 255 . | 0.6174 | 0.6580 | 0.6555 | -0.0219 | 0.0010  | - |
| 0.0090 | 1   | .   |                             |        |        |        |         |         |   |
| 1916   | CD  | CD  | . LYS LYS LYS A A 255 255 . | 0.6391 | 0.7192 | 0.7303 | -0.0472 | -0.0071 |   |
| 0.0117 | 1   | .   |                             |        |        |        |         |         |   |
| 1917   | CE  | CE  | . LYS LYS LYS A A 255 255 . | 0.6840 | 0.7715 | 0.7561 | -0.0604 | -0.0142 |   |
| 0.0099 | 1   | .   |                             |        |        |        |         |         |   |
| 1918   | NZ  | NZ  | . LYS LYS LYS A A 255 255 . | 0.6806 | 0.7987 | 0.7927 | -0.0578 | -0.0099 |   |
| 0.0297 | 1   | .   |                             |        |        |        |         |         |   |
| 1919   | C   | C   | . LYS LYS LYS A A 255 255 . | 0.5833 | 0.6005 | 0.6101 | -0.0009 | 0.0052  | - |
| 0.0009 | 1   | .   |                             |        |        |        |         |         |   |
| 1920   | O   | O   | . LYS LYS LYS A A 255 255 . | 0.5699 | 0.5965 | 0.6227 | 0.0054  | 0.0109  | - |
| 0.0047 | 1   | .   |                             |        |        |        |         |         |   |
| 1921   | N   | N   | . TYR TYR TYR A A 256 256 . | 0.5643 | 0.5899 | 0.5933 | 0.0038  | 0.0018  | - |
| 0.0057 | 1   | .   |                             |        |        |        |         |         |   |
| 1922   | CA  | CA  | . TYR TYR TYR A A 256 256 . | 0.5581 | 0.5762 | 0.5789 | 0.0020  | -0.0018 | - |
| 0.0056 | 1   | .   |                             |        |        |        |         |         |   |
| 1923   | CB  | CB  | . TYR TYR TYR A A 256 256 . | 0.5442 | 0.5728 | 0.5722 | -0.0014 | 0.0009  | - |
| 0.0025 | 1   | .   |                             |        |        |        |         |         |   |
| 1924   | CG  | CG  | . TYR TYR TYR A A 256 256 . | 0.5310 | 0.5644 | 0.5556 | -0.0216 | -0.0156 |   |
| 0.0044 | 1   | .   |                             |        |        |        |         |         |   |
| 1925   | CD1 | CD1 | . TYR TYR TYR A A 256 256 . | 0.5568 | 0.5530 | 0.5414 | -0.0353 | -0.0305 |   |
| 0.0103 | 1   | .   |                             |        |        |        |         |         |   |
| 1926   | CE1 | CE1 | . TYR TYR TYR A A 256 256 . | 0.5433 | 0.5730 | 0.5432 | -0.0506 | -0.0575 |   |
| 0.0160 | 1   | .   |                             |        |        |        |         |         |   |
| 1927   | CZ  | CZ  | . TYR TYR TYR A A 256 256 . | 0.5428 | 0.5704 | 0.5164 | -0.0612 | -0.0307 |   |
| 0.0179 | 1   | .   |                             |        |        |        |         |         |   |
| 1928   | OH  | OH  | . TYR TYR TYR A A 256 256 . | 0.5091 | 0.5767 | 0.4660 | -0.0536 | -0.0289 |   |
| 0.0374 | 1   | .   |                             |        |        |        |         |         |   |
| 1929   | CE2 | CE2 | . TYR TYR TYR A A 256 256 . | 0.5377 | 0.5973 | 0.5131 | -0.0476 | -0.0404 |   |
| 0.0072 | 1   | .   |                             |        |        |        |         |         |   |
| 1930   | CD2 | CD2 | . TYR TYR TYR A A 256 256 . | 0.5092 | 0.5437 | 0.5469 | -0.0593 | -0.0379 | - |
| 0.0025 | 1   | .   |                             |        |        |        |         |         |   |
| 1931   | C   | C   | . TYR TYR TYR A A 256 256 . | 0.5470 | 0.5699 | 0.5740 | 0.0063  | -0.0071 | - |
| 0.0090 | 1   | .   |                             |        |        |        |         |         |   |
| 1932   | O   | O   | . TYR TYR TYR A A 256 256 . | 0.5314 | 0.5749 | 0.5860 | 0.0174  | -0.0158 | - |
| 0.0223 | 1   | .   |                             |        |        |        |         |         |   |

|        |     |     |                             |        |        |        |         |         |   |
|--------|-----|-----|-----------------------------|--------|--------|--------|---------|---------|---|
| 1933   | N   | N   | . ASP ASP ASP A A 257 257 . | 0.5382 | 0.5621 | 0.5682 | 0.0051  | -0.0097 | - |
| 0.0103 | 1   | .   |                             |        |        |        |         |         |   |
| 1934   | CA  | CA  | . ASP ASP ASP A A 257 257 . | 0.5046 | 0.5511 | 0.5528 | 0.0076  | -0.0115 | - |
| 0.0064 | 1   | .   |                             |        |        |        |         |         |   |
| 1935   | CB  | CB  | . ASP ASP ASP A A 257 257 . | 0.4567 | 0.5446 | 0.5584 | 0.0097  | -0.0151 | - |
| 0.0070 | 1   | .   |                             |        |        |        |         |         |   |
| 1936   | CG  | CG  | . ASP ASP ASP A A 257 257 . | 0.3594 | 0.5506 | 0.5767 | 0.0302  | -0.0335 | - |
| 0.0183 | 1   | .   |                             |        |        |        |         |         |   |
| 1937   | OD1 | OD1 | . ASP ASP ASP A A 257 257 . | 0.1279 | 0.5608 | 0.6108 | 0.1273  | -0.0357 | - |
| 0.0823 | 1   | .   |                             |        |        |        |         |         |   |
| 1938   | OD2 | OD2 | . ASP ASP ASP A A 257 257 . | 0.2750 | 0.5506 | 0.6113 | 0.0036  | -0.0969 | - |
| 0.0470 | 1   | .   |                             |        |        |        |         |         |   |
| 1939   | C   | C   | . ASP ASP ASP A A 257 257 . | 0.5127 | 0.5657 | 0.5567 | 0.0033  | -0.0035 | - |
| 0.0099 | 1   | .   |                             |        |        |        |         |         |   |
| 1940   | O   | O   | . ASP ASP ASP A A 257 257 . | 0.5021 | 0.5857 | 0.5655 | 0.0125  | -0.0083 | - |
| 0.0103 | 1   | .   |                             |        |        |        |         |         |   |
| 1941   | N   | N   | . LEU LEU LEU A A 258 258 . | 0.5203 | 0.5549 | 0.5544 | 0.0032  | 0.0011  | - |
| 0.0130 | 1   | .   |                             |        |        |        |         |         |   |
| 1942   | CA  | CA  | . LEU LEU LEU A A 258 258 . | 0.5359 | 0.5626 | 0.5486 | 0.0010  | -0.0005 | - |
| 0.0097 | 1   | .   |                             |        |        |        |         |         |   |
| 1943   | CB  | CB  | . LEU LEU LEU A A 258 258 . | 0.5310 | 0.5683 | 0.5518 | -0.0060 | 0.0025  | - |
| 0.0130 | 1   | .   |                             |        |        |        |         |         |   |
| 1944   | CG  | CG  | . LEU LEU LEU A A 258 258 . | 0.5191 | 0.5721 | 0.5412 | -0.0177 | 0.0031  | - |
| 0.0054 | 1   | .   |                             |        |        |        |         |         |   |
| 1945   | CD1 | CD1 | . LEU LEU LEU A A 258 258 . | 0.4750 | 0.6028 | 0.5375 | -0.0311 | 0.0255  | - |
| 0.0005 | 1   | .   |                             |        |        |        |         |         |   |
| 1946   | CD2 | CD2 | . LEU LEU LEU A A 258 258 . | 0.5124 | 0.5480 | 0.5560 | -0.0534 | 0.0261  | - |
| 0.0032 | 1   | .   |                             |        |        |        |         |         |   |
| 1947   | C   | C   | . LEU LEU LEU A A 258 258 . | 0.5451 | 0.5623 | 0.5542 | 0.0039  | -0.0007 | - |
| 0.0106 | 1   | .   |                             |        |        |        |         |         |   |
| 1948   | O   | O   | . LEU LEU LEU A A 258 258 . | 0.5562 | 0.5518 | 0.5543 | 0.0126  | -0.0097 | - |
| 0.0151 | 1   | .   |                             |        |        |        |         |         |   |
| 1949   | N   | N   | . ASP ASP ASP A A 259 259 . | 0.5367 | 0.5692 | 0.5612 | 0.0024  | 0.0012  | - |
| 0.0045 | 1   | .   |                             |        |        |        |         |         |   |
| 1950   | CA  | CA  | . ASP ASP ASP A A 259 259 . | 0.5226 | 0.5630 | 0.5538 | 0.0038  | 0.0001  | - |
| 0.0044 | 1   | .   |                             |        |        |        |         |         |   |
| 1951   | CB  | CB  | . ASP ASP ASP A A 259 259 . | 0.5359 | 0.5687 | 0.5683 | -0.0013 | 0.0120  | - |
| 0.0023 | 1   | .   |                             |        |        |        |         |         |   |
| 1952   | CG  | CG  | . ASP ASP ASP A A 259 259 . | 0.5820 | 0.6037 | 0.6237 | -0.0047 | 0.0173  | - |
| 0.0053 | 1   | .   |                             |        |        |        |         |         |   |
| 1953   | OD1 | OD1 | . ASP ASP ASP A A 259 259 . | 0.5471 | 0.6638 | 0.6865 | -0.0500 | 0.0430  | - |
| 0.0012 | 1   | .   |                             |        |        |        |         |         |   |
| 1954   | OD2 | OD2 | . ASP ASP ASP A A 259 259 . | 0.5987 | 0.6468 | 0.7012 | -0.0169 | 0.0295  | - |
| 0.0139 | 1   | .   |                             |        |        |        |         |         |   |
| 1955   | C   | C   | . ASP ASP ASP A A 259 259 . | 0.4996 | 0.5511 | 0.5437 | 0.0041  | -0.0023 | - |
| 0.0075 | 1   | .   |                             |        |        |        |         |         |   |
| 1956   | O   | O   | . ASP ASP ASP A A 259 259 . | 0.4565 | 0.5596 | 0.5531 | 0.0043  | -0.0060 | - |
| 0.0089 | 1   | .   |                             |        |        |        |         |         |   |
| 1957   | N   | N   | . PHE PHE PHE A A 260 260 . | 0.5164 | 0.5531 | 0.5501 | 0.0088  | -0.0011 | - |
| 0.0007 | 1   | .   |                             |        |        |        |         |         |   |
| 1958   | CA  | CA  | . PHE PHE PHE A A 260 260 . | 0.5085 | 0.5433 | 0.5492 | 0.0003  | -0.0022 | - |
| 0.0033 | 1   | .   |                             |        |        |        |         |         |   |
| 1959   | CB  | CB  | . PHE PHE PHE A A 260 260 . | 0.5164 | 0.5379 | 0.5418 | 0.0040  | -0.0001 | - |
| 0.0087 | 1   | .   |                             |        |        |        |         |         |   |
| 1960   | CG  | CG  | . PHE PHE PHE A A 260 260 . | 0.4831 | 0.5293 | 0.5409 | 0.0084  | -0.0020 | - |
| 0.0211 | 1   | .   |                             |        |        |        |         |         |   |
| 1961   | CD1 | CD1 | . PHE PHE PHE A A 260 260 . | 0.4829 | 0.4951 | 0.5539 | -0.0130 | -0.0217 | - |
| 0.0342 | 1   | .   |                             |        |        |        |         |         |   |
| 1962   | CE1 | CE1 | . PHE PHE PHE A A 260 260 . | 0.5305 | 0.4968 | 0.5591 | 0.0288  | -0.0297 | - |
| 0.0319 | 1   | .   |                             |        |        |        |         |         |   |







|        |     |     |                             |        |        |        |         |         |   |
|--------|-----|-----|-----------------------------|--------|--------|--------|---------|---------|---|
| 2023   | NE  | NE  | . ARG ARG ARG A A 268 268 . | 0.6826 | 0.6642 | 0.6387 | -0.0132 | 0.0093  |   |
| 0.0090 | 1   | .   |                             |        |        |        |         |         |   |
| 2024   | CZ  | CZ  | . ARG ARG ARG A A 268 268 . | 0.6454 | 0.6258 | 0.6292 | 0.0092  | -0.0046 | - |
| 0.0093 | 1   | .   |                             |        |        |        |         |         |   |
| 2025   | NH1 | NH1 | . ARG ARG ARG A A 268 268 . | 0.6416 | 0.5471 | 0.6088 | 0.0330  | 0.0220  | - |
| 0.0021 | 1   | .   |                             |        |        |        |         |         |   |
| 2026   | NH2 | NH2 | . ARG ARG ARG A A 268 268 . | 0.6250 | 0.6002 | 0.6069 | 0.0428  | -0.0194 |   |
| 0.0001 | 1   | .   |                             |        |        |        |         |         |   |
| 2027   | C   | C   | . ARG ARG ARG A A 268 268 . | 0.6490 | 0.6645 | 0.6639 | -0.0005 | 0.0011  | - |
| 0.0020 | 1   | .   |                             |        |        |        |         |         |   |
| 2028   | O   | O   | . ARG ARG ARG A A 268 268 . | 0.6450 | 0.6735 | 0.6659 | -0.0021 | 0.0055  |   |
| 0.0013 | 1   | .   |                             |        |        |        |         |         |   |
| 2029   | N   | N   | . TYR TYR TYR A A 269 269 . | 0.6243 | 0.6460 | 0.6509 | -0.0011 | 0.0041  | - |
| 0.0022 | 1   | .   |                             |        |        |        |         |         |   |
| 2030   | CA  | CA  | . TYR TYR TYR A A 269 269 . | 0.6120 | 0.6326 | 0.6297 | 0.0029  | 0.0047  | - |
| 0.0063 | 1   | .   |                             |        |        |        |         |         |   |
| 2031   | CB  | CB  | . TYR TYR TYR A A 269 269 . | 0.6187 | 0.6348 | 0.6301 | 0.0026  | 0.0057  | - |
| 0.0047 | 1   | .   |                             |        |        |        |         |         |   |
| 2032   | CG  | CG  | . TYR TYR TYR A A 269 269 . | 0.6063 | 0.6397 | 0.6460 | -0.0018 | 0.0010  | - |
| 0.0179 | 1   | .   |                             |        |        |        |         |         |   |
| 2033   | CD1 | CD1 | . TYR TYR TYR A A 269 269 . | 0.5761 | 0.6641 | 0.6361 | -0.0118 | 0.0056  | - |
| 0.0325 | 1   | .   |                             |        |        |        |         |         |   |
| 2034   | CE1 | CE1 | . TYR TYR TYR A A 269 269 . | 0.5062 | 0.6695 | 0.6470 | -0.0185 | -0.0177 | - |
| 0.0386 | 1   | .   |                             |        |        |        |         |         |   |
| 2035   | CZ  | CZ  | . TYR TYR TYR A A 269 269 . | 0.4824 | 0.6704 | 0.6553 | 0.0029  | -0.0130 | - |
| 0.0216 | 1   | .   |                             |        |        |        |         |         |   |
| 2036   | OH  | OH  | . TYR TYR TYR A A 269 269 . | 0.4185 | 0.6812 | 0.6820 | 0.0461  | -0.0080 | - |
| 0.0407 | 1   | .   |                             |        |        |        |         |         |   |
| 2037   | CE2 | CE2 | . TYR TYR TYR A A 269 269 . | 0.4899 | 0.6619 | 0.6489 | 0.0104  | 0.0035  | - |
| 0.0171 | 1   | .   |                             |        |        |        |         |         |   |
| 2038   | CD2 | CD2 | . TYR TYR TYR A A 269 269 . | 0.5466 | 0.6499 | 0.6603 | -0.0024 | 0.0079  | - |
| 0.0293 | 1   | .   |                             |        |        |        |         |         |   |
| 2039   | C   | C   | . TYR TYR TYR A A 269 269 . | 0.5873 | 0.6205 | 0.6180 | 0.0012  | 0.0015  | - |
| 0.0059 | 1   | .   |                             |        |        |        |         |         |   |
| 2040   | O   | O   | . TYR TYR TYR A A 269 269 . | 0.5482 | 0.6132 | 0.6224 | 0.0091  | 0.0115  | - |
| 0.0040 | 1   | .   |                             |        |        |        |         |         |   |
| 2041   | N   | N   | . ILE ILE ILE A A 270 270 . | 0.5512 | 0.6064 | 0.5980 | 0.0011  | 0.0003  | - |
| 0.0082 | 1   | .   |                             |        |        |        |         |         |   |
| 2042   | CA  | CA  | . ILE ILE ILE A A 270 270 . | 0.5370 | 0.5939 | 0.5956 | -0.0002 | -0.0014 | - |
| 0.0069 | 1   | .   |                             |        |        |        |         |         |   |
| 2043   | CB  | CB  | . ILE ILE ILE A A 270 270 . | 0.5371 | 0.5869 | 0.5915 | -0.0013 | -0.0096 | - |
| 0.0086 | 1   | .   |                             |        |        |        |         |         |   |
| 2044   | CG1 | CG1 | . ILE ILE ILE A A 270 270 . | 0.5165 | 0.5708 | 0.5697 | 0.0141  | -0.0009 | - |
| 0.0130 | 1   | .   |                             |        |        |        |         |         |   |
| 2045   | CD1 | CD1 | . ILE ILE ILE A A 270 270 . | 0.5112 | 0.5394 | 0.4838 | 0.0119  | -0.0496 | - |
| 0.0092 | 1   | .   |                             |        |        |        |         |         |   |
| 2046   | CG2 | CG2 | . ILE ILE ILE A A 270 270 . | 0.4739 | 0.5948 | 0.5835 | 0.0106  | 0.0031  |   |
| 0.0006 | 1   | .   |                             |        |        |        |         |         |   |
| 2047   | C   | C   | . ILE ILE ILE A A 270 270 . | 0.5447 | 0.5937 | 0.5961 | -0.0018 | -0.0040 | - |
| 0.0105 | 1   | .   |                             |        |        |        |         |         |   |
| 2048   | O   | O   | . ILE ILE ILE A A 270 270 . | 0.5811 | 0.6145 | 0.6314 | -0.0098 | 0.0070  | - |
| 0.0157 | 1   | .   |                             |        |        |        |         |         |   |
| 2049   | N   | N   | . THR THR THR A A 271 271 . | 0.5166 | 0.5917 | 0.5860 | 0.0021  | -0.0047 | - |
| 0.0061 | 1   | .   |                             |        |        |        |         |         |   |
| 2050   | CA  | CA  | . THR THR THR A A 271 271 . | 0.4985 | 0.5793 | 0.5766 | 0.0162  | -0.0126 | - |
| 0.0116 | 1   | .   |                             |        |        |        |         |         |   |
| 2051   | CB  | CB  | . THR THR THR A A 271 271 . | 0.4926 | 0.5827 | 0.5791 | 0.0139  | -0.0084 | - |
| 0.0133 | 1   | .   |                             |        |        |        |         |         |   |
| 2052   | OG1 | OG1 | . THR THR THR A A 271 271 . | 0.3208 | 0.6027 | 0.6269 | 0.0857  | -0.0242 | - |
| 0.0339 | 1   | .   |                             |        |        |        |         |         |   |



|        |     |     |                             |        |        |        |         |         |   |
|--------|-----|-----|-----------------------------|--------|--------|--------|---------|---------|---|
| 2083   | C   | C   | . LEU LEU LEU A A 275 275 . | 0.5728 | 0.5777 | 0.5759 | -0.0084 | -0.0119 | - |
| 0.0113 | 1   | .   |                             |        |        |        |         |         |   |
| 2084   | O   | O   | . LEU LEU LEU A A 275 275 . | 0.5861 | 0.5805 | 0.5647 | -0.0037 | -0.0168 | - |
| 0.0205 | 1   | .   |                             |        |        |        |         |         |   |
| 2085   | N   | N   | . GLY GLY GLY A A 276 276 . | 0.5605 | 0.5726 | 0.5680 | -0.0088 | -0.0153 | - |
| 0.0176 | 1   | .   |                             |        |        |        |         |         |   |
| 2086   | CA  | CA  | . GLY GLY GLY A A 276 276 . | 0.5504 | 0.5633 | 0.5689 | -0.0065 | -0.0072 | - |
| 0.0112 | 1   | .   |                             |        |        |        |         |         |   |
| 2087   | C   | C   | . GLY GLY GLY A A 276 276 . | 0.5462 | 0.5666 | 0.5713 | 0.0026  | -0.0073 | - |
| 0.0142 | 1   | .   |                             |        |        |        |         |         |   |
| 2088   | O   | O   | . GLY GLY GLY A A 276 276 . | 0.5274 | 0.5688 | 0.5875 | 0.0144  | -0.0065 | - |
| 0.0146 | 1   | .   |                             |        |        |        |         |         |   |
| 2089   | N   | N   | . ALA ALA ALA A A 277 277 . | 0.5191 | 0.5557 | 0.5633 | 0.0007  | -0.0108 | - |
| 0.0124 | 1   | .   |                             |        |        |        |         |         |   |
| 2090   | CA  | CA  | . ALA ALA ALA A A 277 277 . | 0.5153 | 0.5492 | 0.5575 | 0.0014  | -0.0137 | - |
| 0.0084 | 1   | .   |                             |        |        |        |         |         |   |
| 2091   | CB  | CB  | . ALA ALA ALA A A 277 277 . | 0.5034 | 0.5451 | 0.5546 | 0.0011  | -0.0127 | - |
| 0.0079 | 1   | .   |                             |        |        |        |         |         |   |
| 2092   | C   | C   | . ALA ALA ALA A A 277 277 . | 0.5014 | 0.5559 | 0.5504 | 0.0008  | -0.0168 | - |
| 0.0128 | 1   | .   |                             |        |        |        |         |         |   |
| 2093   | O   | O   | . ALA ALA ALA A A 277 277 . | 0.5001 | 0.5719 | 0.5604 | -0.0052 | -0.0336 | - |
| 0.0188 | 1   | .   |                             |        |        |        |         |         |   |
| 2094   | N   | N   | . LEU LEU LEU A A 278 278 . | 0.4958 | 0.5583 | 0.5513 | 0.0030  | -0.0137 | - |
| 0.0097 | 1   | .   |                             |        |        |        |         |         |   |
| 2095   | CA  | CA  | . LEU LEU LEU A A 278 278 . | 0.5183 | 0.5469 | 0.5340 | -0.0019 | -0.0063 | - |
| 0.0028 | 1   | .   |                             |        |        |        |         |         |   |
| 2096   | CB  | CB  | . LEU LEU LEU A A 278 278 . | 0.5313 | 0.5489 | 0.5443 | -0.0106 | -0.0026 | - |
| 0.0039 | 1   | .   |                             |        |        |        |         |         |   |
| 2097   | CG  | CG  | . LEU LEU LEU A A 278 278 . | 0.6135 | 0.5527 | 0.5493 | -0.0301 | -0.0025 | - |
| 0.0093 | 1   | .   |                             |        |        |        |         |         |   |
| 2098   | CD1 | CD1 | . LEU LEU LEU A A 278 278 . | 0.6808 | 0.5773 | 0.6014 | -0.0597 | -0.0013 | - |
| 0.0096 | 1   | .   |                             |        |        |        |         |         |   |
| 2099   | CD2 | CD2 | . LEU LEU LEU A A 278 278 . | 0.6689 | 0.5190 | 0.5606 | -0.0340 | -0.0025 | - |
| 0.0037 | 1   | .   |                             |        |        |        |         |         |   |
| 2100   | C   | C   | . LEU LEU LEU A A 278 278 . | 0.5003 | 0.5350 | 0.5274 | -0.0040 | -0.0160 | - |
| 0.0032 | 1   | .   |                             |        |        |        |         |         |   |
| 2101   | O   | O   | . LEU LEU LEU A A 278 278 . | 0.4771 | 0.5316 | 0.5166 | -0.0041 | -0.0267 | - |
| 0.0012 | 1   | .   |                             |        |        |        |         |         |   |
| 2102   | N   | N   | . TYR TYR TYR A A 279 279 . | 0.4859 | 0.5176 | 0.5151 | -0.0051 | -0.0116 | - |
| 0.0061 | 1   | .   |                             |        |        |        |         |         |   |
| 2103   | CA  | CA  | . TYR TYR TYR A A 279 279 . | 0.4910 | 0.5126 | 0.5111 | 0.0029  | -0.0102 | - |
| 0.0082 | 1   | .   |                             |        |        |        |         |         |   |
| 2104   | CB  | CB  | . TYR TYR TYR A A 279 279 . | 0.4769 | 0.4986 | 0.5016 | 0.0010  | -0.0083 | - |
| 0.0049 | 1   | .   |                             |        |        |        |         |         |   |
| 2105   | CG  | CG  | . TYR TYR TYR A A 279 279 . | 0.4353 | 0.5073 | 0.4863 | -0.0025 | -0.0216 | - |
| 0.0070 | 1   | .   |                             |        |        |        |         |         |   |
| 2106   | CD1 | CD1 | . TYR TYR TYR A A 279 279 . | 0.3428 | 0.5064 | 0.4651 | -0.0194 | -0.0049 | - |
| 0.0064 | 1   | .   |                             |        |        |        |         |         |   |
| 2107   | CE1 | CE1 | . TYR TYR TYR A A 279 279 . | 0.3191 | 0.4985 | 0.4825 | 0.0001  | 0.0159  | - |
| 0.0122 | 1   | .   |                             |        |        |        |         |         |   |
| 2108   | CZ  | CZ  | . TYR TYR TYR A A 279 279 . | 0.3697 | 0.5055 | 0.4906 | -0.0147 | 0.0092  | - |
| 0.0030 | 1   | .   |                             |        |        |        |         |         |   |
| 2109   | OH  | OH  | . TYR TYR TYR A A 279 279 . | 0.2484 | 0.5443 | 0.4835 | -0.0366 | -0.0048 | - |
| 0.0180 | 1   | .   |                             |        |        |        |         |         |   |
| 2110   | CE2 | CE2 | . TYR TYR TYR A A 279 279 . | 0.3885 | 0.5155 | 0.4648 | -0.0145 | -0.0109 | - |
| 0.0061 | 1   | .   |                             |        |        |        |         |         |   |
| 2111   | CD2 | CD2 | . TYR TYR TYR A A 279 279 . | 0.4028 | 0.4891 | 0.4738 | -0.0212 | -0.0197 | - |
| 0.0189 | 1   | .   |                             |        |        |        |         |         |   |
| 2112   | C   | C   | . TYR TYR TYR A A 279 279 . | 0.4982 | 0.5194 | 0.5149 | 0.0095  | -0.0141 | - |
| 0.0101 | 1   | .   |                             |        |        |        |         |         |   |

|        |     |     |                             |        |        |        |         |         |   |
|--------|-----|-----|-----------------------------|--------|--------|--------|---------|---------|---|
| 2113   | O   | O   | . TYR TYR TYR A A 279 279 . | 0.4769 | 0.5409 | 0.5150 | 0.0076  | -0.0222 | - |
| 0.0123 | 1   | .   |                             |        |        |        |         |         |   |
| 2114   | N   | N   | . GLN GLN GLN A A 280 280 . | 0.4941 | 0.5173 | 0.5114 | 0.0200  | -0.0226 | - |
| 0.0083 | 1   | .   |                             |        |        |        |         |         |   |
| 2115   | CA  | CA  | . GLN GLN GLN A A 280 280 . | 0.5074 | 0.5171 | 0.5227 | 0.0132  | -0.0207 | - |
| 0.0088 | 1   | .   |                             |        |        |        |         |         |   |
| 2116   | CB  | CB  | . GLN GLN GLN A A 280 280 . | 0.5106 | 0.5245 | 0.5168 | 0.0078  | -0.0257 | - |
| 0.0092 | 1   | .   |                             |        |        |        |         |         |   |
| 2117   | CG  | CG  | . GLN GLN GLN A A 280 280 . | 0.5376 | 0.5455 | 0.5603 | 0.0093  | -0.0150 | - |
| 0.0089 | 1   | .   |                             |        |        |        |         |         |   |
| 2118   | CD  | CD  | . GLN GLN GLN A A 280 280 . | 0.5439 | 0.5880 | 0.6147 | 0.0046  | -0.0168 | - |
| 0.0146 | 1   | .   |                             |        |        |        |         |         |   |
| 2119   | OE1 | OE1 | . GLN GLN GLN A A 280 280 . | 0.5790 | 0.5949 | 0.6514 | 0.0064  | -0.0102 | - |
| 0.0497 | 1   | .   |                             |        |        |        |         |         |   |
| 2120   | NE2 | NE2 | . GLN GLN GLN A A 280 280 . | 0.5017 | 0.5779 | 0.6413 | 0.0297  | -0.0540 | - |
| 0.0035 | 1   | .   |                             |        |        |        |         |         |   |
| 2121   | C   | C   | . GLN GLN GLN A A 280 280 . | 0.5013 | 0.5135 | 0.5114 | 0.0038  | -0.0241 | - |
| 0.0093 | 1   | .   |                             |        |        |        |         |         |   |
| 2122   | O   | O   | . GLN GLN GLN A A 280 280 . | 0.4980 | 0.4834 | 0.5081 | 0.0093  | -0.0339 | - |
| 0.0271 | 1   | .   |                             |        |        |        |         |         |   |
| 2123   | N   | N   | . ASP ASP ASP A A 281 281 . | 0.4963 | 0.5281 | 0.5238 | 0.0047  | -0.0269 | - |
| 0.0087 | 1   | .   |                             |        |        |        |         |         |   |
| 2124   | CA  | CA  | . ASP ASP ASP A A 281 281 . | 0.4998 | 0.5250 | 0.5359 | 0.0018  | -0.0185 | - |
| 0.0132 | 1   | .   |                             |        |        |        |         |         |   |
| 2125   | CB  | CB  | . ASP ASP ASP A A 281 281 . | 0.5138 | 0.5335 | 0.5333 | -0.0005 | -0.0071 | - |
| 0.0158 | 1   | .   |                             |        |        |        |         |         |   |
| 2126   | CG  | CG  | . ASP ASP ASP A A 281 281 . | 0.5349 | 0.5745 | 0.5548 | -0.0102 | -0.0001 | - |
| 0.0137 | 1   | .   |                             |        |        |        |         |         |   |
| 2127   | OD1 | OD1 | . ASP ASP ASP A A 281 281 . | 0.6150 | 0.6604 | 0.5785 | -0.0401 | -0.0038 | - |
| 0.0441 | 1   | .   |                             |        |        |        |         |         |   |
| 2128   | OD2 | OD2 | . ASP ASP ASP A A 281 281 . | 0.5194 | 0.5538 | 0.5993 | -0.0272 | 0.0401  | - |
| 0.0311 | 1   | .   |                             |        |        |        |         |         |   |
| 2129   | C   | C   | . ASP ASP ASP A A 281 281 . | 0.5034 | 0.5258 | 0.5398 | 0.0080  | -0.0207 | - |
| 0.0170 | 1   | .   |                             |        |        |        |         |         |   |
| 2130   | O   | O   | . ASP ASP ASP A A 281 281 . | 0.4816 | 0.5273 | 0.5629 | 0.0174  | -0.0245 | - |
| 0.0143 | 1   | .   |                             |        |        |        |         |         |   |
| 2131   | N   | N   | . PHE PHE PHE A A 282 282 . | 0.4903 | 0.5361 | 0.5227 | 0.0046  | -0.0269 | - |
| 0.0217 | 1   | .   |                             |        |        |        |         |         |   |
| 2132   | CA  | CA  | . PHE PHE PHE A A 282 282 . | 0.5054 | 0.5257 | 0.5180 | -0.0020 | -0.0198 | - |
| 0.0194 | 1   | .   |                             |        |        |        |         |         |   |
| 2133   | CB  | CB  | . PHE PHE PHE A A 282 282 . | 0.5118 | 0.5297 | 0.5120 | 0.0010  | -0.0221 | - |
| 0.0181 | 1   | .   |                             |        |        |        |         |         |   |
| 2134   | CG  | CG  | . PHE PHE PHE A A 282 282 . | 0.5213 | 0.5294 | 0.5236 | 0.0005  | -0.0212 | - |
| 0.0020 | 1   | .   |                             |        |        |        |         |         |   |
| 2135   | CD1 | CD1 | . PHE PHE PHE A A 282 282 . | 0.5366 | 0.5181 | 0.5311 | 0.0034  | -0.0189 | - |
| 0.0002 | 1   | .   |                             |        |        |        |         |         |   |
| 2136   | CE1 | CE1 | . PHE PHE PHE A A 282 282 . | 0.5202 | 0.5361 | 0.5450 | -0.0103 | -0.0256 | - |
| 0.0180 | 1   | .   |                             |        |        |        |         |         |   |
| 2137   | CZ  | CZ  | . PHE PHE PHE A A 282 282 . | 0.5972 | 0.5128 | 0.5790 | 0.0001  | 0.0002  | - |
| 0.0110 | 1   | .   |                             |        |        |        |         |         |   |
| 2138   | CE2 | CE2 | . PHE PHE PHE A A 282 282 . | 0.5879 | 0.5210 | 0.5493 | -0.0214 | -0.0030 | - |
| 0.0088 | 1   | .   |                             |        |        |        |         |         |   |
| 2139   | CD2 | CD2 | . PHE PHE PHE A A 282 282 . | 0.5393 | 0.5217 | 0.5502 | -0.0054 | -0.0126 | - |
| 0.0281 | 1   | .   |                             |        |        |        |         |         |   |
| 2140   | C   | C   | . PHE PHE PHE A A 282 282 . | 0.4857 | 0.5092 | 0.5073 | -0.0099 | -0.0219 | - |
| 0.0265 | 1   | .   |                             |        |        |        |         |         |   |
| 2141   | O   | O   | . PHE PHE PHE A A 282 282 . | 0.4795 | 0.5199 | 0.5144 | -0.0233 | -0.0311 | - |
| 0.0303 | 1   | .   |                             |        |        |        |         |         |   |
| 2142   | N   | N   | . VAL VAL VAL A A 283 283 . | 0.4858 | 0.5085 | 0.5030 | -0.0212 | -0.0132 | - |
| 0.0331 | 1   | .   |                             |        |        |        |         |         |   |

|        |     |     |                             |        |        |        |         |         |   |
|--------|-----|-----|-----------------------------|--------|--------|--------|---------|---------|---|
| 2143   | CA  | CA  | . VAL VAL VAL A A 283 283 . | 0.5020 | 0.5209 | 0.5153 | -0.0123 | -0.0017 | - |
| 0.0281 | 1   | .   |                             |        |        |        |         |         |   |
| 2144   | CB  | CB  | . VAL VAL VAL A A 283 283 . | 0.5143 | 0.5272 | 0.5093 | -0.0126 | -0.0007 | - |
| 0.0281 | 1   | .   |                             |        |        |        |         |         |   |
| 2145   | CG1 | CG1 | . VAL VAL VAL A A 283 283 . | 0.5195 | 0.5589 | 0.5435 | -0.0235 | 0.0039  | - |
| 0.0447 | 1   | .   |                             |        |        |        |         |         |   |
| 2146   | CG2 | CG2 | . VAL VAL VAL A A 283 283 . | 0.5250 | 0.5468 | 0.5345 | -0.0277 | 0.0054  | - |
| 0.0261 | 1   | .   |                             |        |        |        |         |         |   |
| 2147   | C   | C   | . VAL VAL VAL A A 283 283 . | 0.4998 | 0.5290 | 0.5088 | -0.0096 | -0.0031 | - |
| 0.0275 | 1   | .   |                             |        |        |        |         |         |   |
| 2148   | O   | O   | . VAL VAL VAL A A 283 283 . | 0.4546 | 0.5213 | 0.4788 | 0.0012  | 0.0003  | - |
| 0.0343 | 1   | .   |                             |        |        |        |         |         |   |
| 2149   | N   | N   | . ARG ARG ARG A A 284 284 . | 0.5109 | 0.5446 | 0.5241 | 0.0020  | -0.0043 | - |
| 0.0186 | 1   | .   |                             |        |        |        |         |         |   |
| 2150   | CA  | CA  | . ARG ARG ARG A A 284 284 . | 0.5283 | 0.5445 | 0.5379 | -0.0057 | -0.0036 | - |
| 0.0103 | 1   | .   |                             |        |        |        |         |         |   |
| 2151   | CB  | CB  | . ARG ARG ARG A A 284 284 . | 0.5321 | 0.5662 | 0.5554 | 0.0022  | -0.0029 | - |
| 0.0050 | 1   | .   |                             |        |        |        |         |         |   |
| 2152   | CG  | CG  | . ARG ARG ARG A A 284 284 . | 0.5551 | 0.6085 | 0.5997 | -0.0172 | 0.0158  |   |
| 0.0013 | 1   | .   |                             |        |        |        |         |         |   |
| 2153   | CD  | CD  | . ARG ARG ARG A A 284 284 . | 0.6028 | 0.6456 | 0.6436 | -0.0418 | -0.0036 | - |
| 0.0147 | 1   | .   |                             |        |        |        |         |         |   |
| 2154   | NE  | NE  | . ARG ARG ARG A A 284 284 . | 0.6359 | 0.6396 | 0.6717 | -0.0143 | 0.0245  |   |
| 0.0162 | 1   | .   |                             |        |        |        |         |         |   |
| 2155   | CZ  | CZ  | . ARG ARG ARG A A 284 284 . | 0.6539 | 0.6479 | 0.6890 | -0.0036 | 0.0441  |   |
| 0.0074 | 1   | .   |                             |        |        |        |         |         |   |
| 2156   | NH1 | NH1 | . ARG ARG ARG A A 284 284 . | 0.6457 | 0.6702 | 0.6981 | 0.0191  | 0.0431  |   |
| 0.0090 | 1   | .   |                             |        |        |        |         |         |   |
| 2157   | NH2 | NH2 | . ARG ARG ARG A A 284 284 . | 0.6841 | 0.6771 | 0.7295 | 0.0249  | 0.0576  |   |
| 0.0034 | 1   | .   |                             |        |        |        |         |         |   |
| 2158   | C   | C   | . ARG ARG ARG A A 284 284 . | 0.5238 | 0.5479 | 0.5355 | 0.0016  | -0.0061 | - |
| 0.0106 | 1   | .   |                             |        |        |        |         |         |   |
| 2159   | O   | O   | . ARG ARG ARG A A 284 284 . | 0.5266 | 0.5495 | 0.5347 | 0.0034  | -0.0038 | - |
| 0.0186 | 1   | .   |                             |        |        |        |         |         |   |
| 2160   | N   | N   | . ASP ASP ASP A A 285 285 . | 0.5060 | 0.5414 | 0.5293 | 0.0011  | -0.0044 | - |
| 0.0063 | 1   | .   |                             |        |        |        |         |         |   |
| 2161   | CA  | CA  | . ASP ASP ASP A A 285 285 . | 0.4900 | 0.5355 | 0.5321 | -0.0012 | -0.0083 | - |
| 0.0022 | 1   | .   |                             |        |        |        |         |         |   |
| 2162   | CB  | CB  | . ASP ASP ASP A A 285 285 . | 0.4950 | 0.5448 | 0.5456 | -0.0023 | -0.0055 | - |
| 0.0023 | 1   | .   |                             |        |        |        |         |         |   |
| 2163   | CG  | CG  | . ASP ASP ASP A A 285 285 . | 0.4921 | 0.5997 | 0.5869 | -0.0019 | -0.0127 | - |
| 0.0199 | 1   | .   |                             |        |        |        |         |         |   |
| 2164   | OD1 | OD1 | . ASP ASP ASP A A 285 285 . | 0.3985 | 0.6244 | 0.5990 | 0.0109  | -0.0363 | - |
| 0.0534 | 1   | .   |                             |        |        |        |         |         |   |
| 2165   | OD2 | OD2 | . ASP ASP ASP A A 285 285 . | 0.5189 | 0.6616 | 0.6657 | -0.0347 | 0.0156  | - |
| 0.0159 | 1   | .   |                             |        |        |        |         |         |   |
| 2166   | C   | C   | . ASP ASP ASP A A 285 285 . | 0.4917 | 0.5124 | 0.5223 | -0.0007 | -0.0077 |   |
| 0.0002 | 1   | .   |                             |        |        |        |         |         |   |
| 2167   | O   | O   | . ASP ASP ASP A A 285 285 . | 0.4891 | 0.5318 | 0.5219 | -0.0014 | -0.0104 |   |
| 0.0090 | 1   | .   |                             |        |        |        |         |         |   |
| 2168   | N   | N   | . TYR TYR TYR A A 286 286 . | 0.4693 | 0.4889 | 0.5014 | 0.0019  | -0.0139 | - |
| 0.0062 | 1   | .   |                             |        |        |        |         |         |   |
| 2169   | CA  | CA  | . TYR TYR TYR A A 286 286 . | 0.4557 | 0.4527 | 0.4646 | -0.0001 | -0.0122 | - |
| 0.0059 | 1   | .   |                             |        |        |        |         |         |   |
| 2170   | CB  | CB  | . TYR TYR TYR A A 286 286 . | 0.4626 | 0.4456 | 0.4618 | 0.0008  | -0.0185 | - |
| 0.0051 | 1   | .   |                             |        |        |        |         |         |   |
| 2171   | CG  | CG  | . TYR TYR TYR A A 286 286 . | 0.4667 | 0.4694 | 0.4745 | -0.0011 | -0.0079 | - |
| 0.0124 | 1   | .   |                             |        |        |        |         |         |   |
| 2172   | CD1 | CD1 | . TYR TYR TYR A A 286 286 . | 0.4904 | 0.4936 | 0.4907 | -0.0253 | 0.0013  | - |
| 0.0089 | 1   | .   |                             |        |        |        |         |         |   |







|        |     |     |                             |        |        |        |         |         |   |
|--------|-----|-----|-----------------------------|--------|--------|--------|---------|---------|---|
| 2233   | CA  | CA  | . PRO PRO PRO A A 294 294 . | 0.3704 | 0.4162 | 0.4138 | 0.0039  | -0.0113 | - |
| 0.0036 | 1   | .   |                             |        |        |        |         |         |   |
| 2234   | CB  | CB  | . PRO PRO PRO A A 294 294 . | 0.3310 | 0.4194 | 0.3860 | 0.0100  | -0.0098 |   |
| 0.0039 | 1   | .   |                             |        |        |        |         |         |   |
| 2235   | CG  | CG  | . PRO PRO PRO A A 294 294 . | 0.3717 | 0.3923 | 0.4129 | -0.0028 | -0.0206 | - |
| 0.0003 | 1   | .   |                             |        |        |        |         |         |   |
| 2236   | CD  | CD  | . PRO PRO PRO A A 294 294 . | 0.3620 | 0.4058 | 0.3956 | 0.0026  | -0.0139 |   |
| 0.0018 | 1   | .   |                             |        |        |        |         |         |   |
| 2237   | C   | C   | . PRO PRO PRO A A 294 294 . | 0.3875 | 0.4288 | 0.4165 | 0.0037  | -0.0102 | - |
| 0.0021 | 1   | .   |                             |        |        |        |         |         |   |
| 2238   | O   | O   | . PRO PRO PRO A A 294 294 . | 0.4103 | 0.4646 | 0.4255 | 0.0243  | -0.0101 |   |
| 0.0042 | 1   | .   |                             |        |        |        |         |         |   |
| 2239   | N   | N   | . PHE PHE PHE A A 295 295 . | 0.4105 | 0.4456 | 0.4358 | 0.0051  | -0.0145 | - |
| 0.0095 | 1   | .   |                             |        |        |        |         |         |   |
| 2240   | CA  | CA  | . PHE PHE PHE A A 295 295 . | 0.4324 | 0.4626 | 0.4546 | 0.0096  | -0.0152 | - |
| 0.0121 | 1   | .   |                             |        |        |        |         |         |   |
| 2241   | CB  | CB  | . PHE PHE PHE A A 295 295 . | 0.4308 | 0.4638 | 0.4655 | 0.0111  | -0.0100 | - |
| 0.0145 | 1   | .   |                             |        |        |        |         |         |   |
| 2242   | CG  | CG  | . PHE PHE PHE A A 295 295 . | 0.4246 | 0.4746 | 0.4609 | 0.0114  | -0.0331 | - |
| 0.0114 | 1   | .   |                             |        |        |        |         |         |   |
| 2243   | CD1 | CD1 | . PHE PHE PHE A A 295 295 . | 0.4333 | 0.4541 | 0.4845 | 0.0196  | -0.0655 |   |
| 0.0014 | 1   | .   |                             |        |        |        |         |         |   |
| 2244   | CE1 | CE1 | . PHE PHE PHE A A 295 295 . | 0.3545 | 0.4690 | 0.4252 | 0.0525  | -0.0945 | - |
| 0.0006 | 1   | .   |                             |        |        |        |         |         |   |
| 2245   | CZ  | CZ  | . PHE PHE PHE A A 295 295 . | 0.4141 | 0.4577 | 0.4205 | 0.0485  | -0.0631 |   |
| 0.0243 | 1   | .   |                             |        |        |        |         |         |   |
| 2246   | CE2 | CE2 | . PHE PHE PHE A A 295 295 . | 0.4466 | 0.4611 | 0.4171 | 0.0255  | -0.0490 |   |
| 0.0026 | 1   | .   |                             |        |        |        |         |         |   |
| 2247   | CD2 | CD2 | . PHE PHE PHE A A 295 295 . | 0.4257 | 0.4703 | 0.3996 | 0.0109  | -0.0606 | - |
| 0.0017 | 1   | .   |                             |        |        |        |         |         |   |
| 2248   | C   | C   | . PHE PHE PHE A A 295 295 . | 0.4591 | 0.4666 | 0.4753 | 0.0150  | -0.0112 | - |
| 0.0150 | 1   | .   |                             |        |        |        |         |         |   |
| 2249   | O   | O   | . PHE PHE PHE A A 295 295 . | 0.4690 | 0.4741 | 0.4924 | 0.0223  | -0.0130 | - |
| 0.0273 | 1   | .   |                             |        |        |        |         |         |   |
| 2250   | N   | N   | . ASP ASP ASP A A 296 296 . | 0.4656 | 0.4855 | 0.4787 | 0.0281  | -0.0115 | - |
| 0.0147 | 1   | .   |                             |        |        |        |         |         |   |
| 2251   | CA  | CA  | . ASP ASP ASP A A 296 296 . | 0.4874 | 0.4907 | 0.5016 | 0.0219  | -0.0085 | - |
| 0.0195 | 1   | .   |                             |        |        |        |         |         |   |
| 2252   | CB  | CB  | . ASP ASP ASP A A 296 296 . | 0.4986 | 0.4996 | 0.5126 | 0.0320  | -0.0119 | - |
| 0.0260 | 1   | .   |                             |        |        |        |         |         |   |
| 2253   | CG  | CG  | . ASP ASP ASP A A 296 296 . | 0.4813 | 0.5062 | 0.5337 | 0.0409  | -0.0075 | - |
| 0.0186 | 1   | .   |                             |        |        |        |         |         |   |
| 2254   | OD1 | OD1 | . ASP ASP ASP A A 296 296 . | 0.3931 | 0.5166 | 0.5332 | 0.0815  | -0.0178 | - |
| 0.0074 | 1   | .   |                             |        |        |        |         |         |   |
| 2255   | OD2 | OD2 | . ASP ASP ASP A A 296 296 . | 0.4424 | 0.5163 | 0.6044 | 0.0487  | -0.0466 |   |
| 0.0214 | 1   | .   |                             |        |        |        |         |         |   |
| 2256   | C   | C   | . ASP ASP ASP A A 296 296 . | 0.5057 | 0.4964 | 0.5004 | 0.0232  | -0.0078 | - |
| 0.0190 | 1   | .   |                             |        |        |        |         |         |   |
| 2257   | O   | O   | . ASP ASP ASP A A 296 296 . | 0.5130 | 0.4945 | 0.5095 | 0.0379  | -0.0265 | - |
| 0.0183 | 1   | .   |                             |        |        |        |         |         |   |
| 2258   | N   | N   | . GLN GLN GLN A A 297 297 . | 0.4985 | 0.5011 | 0.5012 | 0.0143  | -0.0138 | - |
| 0.0163 | 1   | .   |                             |        |        |        |         |         |   |
| 2259   | CA  | CA  | . GLN GLN GLN A A 297 297 . | 0.5256 | 0.4934 | 0.4938 | 0.0113  | -0.0061 | - |
| 0.0145 | 1   | .   |                             |        |        |        |         |         |   |
| 2260   | CB  | CB  | . GLN GLN GLN A A 297 297 . | 0.5170 | 0.4880 | 0.5034 | 0.0090  | -0.0092 | - |
| 0.0137 | 1   | .   |                             |        |        |        |         |         |   |
| 2261   | CG  | CG  | . GLN GLN GLN A A 297 297 . | 0.5498 | 0.4648 | 0.4940 | 0.0005  | 0.0076  | - |
| 0.0179 | 1   | .   |                             |        |        |        |         |         |   |
| 2262   | CD  | CD  | . GLN GLN GLN A A 297 297 . | 0.5264 | 0.4260 | 0.5213 | -0.0287 | 0.0139  | - |
| 0.0538 | 1   | .   |                             |        |        |        |         |         |   |



|        |     |     |                             |        |        |        |         |           |
|--------|-----|-----|-----------------------------|--------|--------|--------|---------|-----------|
| 2293   | CH2 | CH2 | . TRP TRP TRP A A 300 300 . | 0.6424 | 0.5551 | 0.5743 | 0.0250  | -0.0043   |
| 0.0194 | 1 . |     |                             |        |        |        |         |           |
| 2294   | CZ2 | CZ2 | . TRP TRP TRP A A 300 300 . | 0.5867 | 0.5171 | 0.6071 | 0.0319  | -0.0019   |
| 0.0360 | 1 . |     |                             |        |        |        |         |           |
| 2295   | C   | C   | . TRP TRP TRP A A 300 300 . | 0.6017 | 0.6264 | 0.5978 | 0.0024  | -0.0150 - |
| 0.0079 | 1 . |     |                             |        |        |        |         |           |
| 2296   | O   | O   | . TRP TRP TRP A A 300 300 . | 0.6147 | 0.6397 | 0.6029 | 0.0046  | -0.0255 - |
| 0.0055 | 1 . |     |                             |        |        |        |         |           |
| 2297   | N   | N   | . ALA ALA ALA A A 301 301 . | 0.6010 | 0.6312 | 0.5944 | 0.0104  | -0.0191 - |
| 0.0060 | 1 . |     |                             |        |        |        |         |           |
| 2298   | CA  | CA  | . ALA ALA ALA A A 301 301 . | 0.6031 | 0.6195 | 0.6078 | 0.0104  | -0.0100 - |
| 0.0063 | 1 . |     |                             |        |        |        |         |           |
| 2299   | CB  | CB  | . ALA ALA ALA A A 301 301 . | 0.6006 | 0.6218 | 0.6027 | 0.0139  | -0.0172 - |
| 0.0132 | 1 . |     |                             |        |        |        |         |           |
| 2300   | C   | C   | . ALA ALA ALA A A 301 301 . | 0.6009 | 0.6151 | 0.6007 | 0.0171  | -0.0090   |
| 0.0020 | 1 . |     |                             |        |        |        |         |           |
| 2301   | O   | O   | . ALA ALA ALA A A 301 301 . | 0.6186 | 0.6275 | 0.6045 | 0.0298  | -0.0093 - |
| 0.0063 | 1 . |     |                             |        |        |        |         |           |
| 2302   | N   | N   | . ALA ALA ALA A A 302 302 . | 0.5892 | 0.6065 | 0.5991 | 0.0165  | -0.0071   |
| 0.0051 | 1 . |     |                             |        |        |        |         |           |
| 2303   | CA  | CA  | . ALA ALA ALA A A 302 302 . | 0.5727 | 0.5895 | 0.5889 | 0.0101  | -0.0028   |
| 0.0054 | 1 . |     |                             |        |        |        |         |           |
| 2304   | CB  | CB  | . ALA ALA ALA A A 302 302 . | 0.5569 | 0.5803 | 0.5795 | 0.0136  | -0.0010   |
| 0.0081 | 1 . |     |                             |        |        |        |         |           |
| 2305   | C   | C   | . ALA ALA ALA A A 302 302 . | 0.5562 | 0.5766 | 0.5744 | 0.0071  | -0.0031   |
| 0.0017 | 1 . |     |                             |        |        |        |         |           |
| 2306   | O   | O   | . ALA ALA ALA A A 302 302 . | 0.5444 | 0.5845 | 0.5652 | 0.0019  | -0.0061   |
| 0.0084 | 1 . |     |                             |        |        |        |         |           |
| 2307   | N   | N   | . TRP TRP TRP A A 303 303 . | 0.5551 | 0.5785 | 0.5667 | 0.0088  | -0.0067 - |
| 0.0072 | 1 . |     |                             |        |        |        |         |           |
| 2308   | CA  | CA  | . TRP TRP TRP A A 303 303 . | 0.5506 | 0.5737 | 0.5575 | 0.0096  | -0.0124 - |
| 0.0103 | 1 . |     |                             |        |        |        |         |           |
| 2309   | CB  | CB  | . TRP TRP TRP A A 303 303 . | 0.5484 | 0.5745 | 0.5486 | 0.0171  | -0.0155 - |
| 0.0085 | 1 . |     |                             |        |        |        |         |           |
| 2310   | CG  | CG  | . TRP TRP TRP A A 303 303 . | 0.5196 | 0.5638 | 0.5285 | 0.0202  | -0.0106 - |
| 0.0225 | 1 . |     |                             |        |        |        |         |           |
| 2311   | CD1 | CD1 | . TRP TRP TRP A A 303 303 . | 0.4752 | 0.5539 | 0.4976 | 0.0261  | -0.0126 - |
| 0.0252 | 1 . |     |                             |        |        |        |         |           |
| 2312   | NE1 | NE1 | . TRP TRP TRP A A 303 303 . | 0.5146 | 0.5858 | 0.5283 | 0.0390  | -0.0083 - |
| 0.0285 | 1 . |     |                             |        |        |        |         |           |
| 2313   | CE2 | CE2 | . TRP TRP TRP A A 303 303 . | 0.4951 | 0.5436 | 0.5068 | 0.0276  | -0.0203 - |
| 0.0157 | 1 . |     |                             |        |        |        |         |           |
| 2314   | CD2 | CD2 | . TRP TRP TRP A A 303 303 . | 0.4959 | 0.5493 | 0.4938 | 0.0122  | -0.0126 - |
| 0.0151 | 1 . |     |                             |        |        |        |         |           |
| 2315   | CE3 | CE3 | . TRP TRP TRP A A 303 303 . | 0.4939 | 0.5563 | 0.5110 | 0.0065  | -0.0385 - |
| 0.0065 | 1 . |     |                             |        |        |        |         |           |
| 2316   | CZ3 | CZ3 | . TRP TRP TRP A A 303 303 . | 0.4998 | 0.5511 | 0.4929 | -0.0111 | -0.0106   |
| 0.0201 | 1 . |     |                             |        |        |        |         |           |
| 2317   | CH2 | CH2 | . TRP TRP TRP A A 303 303 . | 0.4698 | 0.5345 | 0.4723 | -0.0213 | -0.0359 - |
| 0.0105 | 1 . |     |                             |        |        |        |         |           |
| 2318   | CZ2 | CZ2 | . TRP TRP TRP A A 303 303 . | 0.4998 | 0.5134 | 0.5048 | 0.0122  | -0.0280 - |
| 0.0264 | 1 . |     |                             |        |        |        |         |           |
| 2319   | C   | C   | . TRP TRP TRP A A 303 303 . | 0.5575 | 0.5780 | 0.5564 | 0.0082  | -0.0181 - |
| 0.0057 | 1 . |     |                             |        |        |        |         |           |
| 2320   | O   | O   | . TRP TRP TRP A A 303 303 . | 0.5604 | 0.5817 | 0.5585 | 0.0179  | -0.0369 - |
| 0.0096 | 1 . |     |                             |        |        |        |         |           |
| 2321   | N   | N   | . SER SER SER A A 304 304 . | 0.5510 | 0.5740 | 0.5551 | 0.0051  | -0.0212   |
| 0.0011 | 1 . |     |                             |        |        |        |         |           |
| 2322   | CA  | CA  | . SER SER SER A A 304 304 . | 0.5538 | 0.5752 | 0.5619 | 0.0064  | -0.0107   |
| 0.0057 | 1 . |     |                             |        |        |        |         |           |

|        |     |     |                             |        |        |        |         |         |   |
|--------|-----|-----|-----------------------------|--------|--------|--------|---------|---------|---|
| 2323   | CB  | CB  | . SER SER SER A A 304 304 . | 0.5490 | 0.5743 | 0.5583 | 0.0067  | -0.0095 |   |
| 0.0066 | 1   | .   |                             |        |        |        |         |         |   |
| 2324   | OG  | OG  | . SER SER SER A A 304 304 . | 0.5237 | 0.5572 | 0.6080 | -0.0022 | -0.0218 | - |
| 0.0028 | 1   | .   |                             |        |        |        |         |         |   |
| 2325   | C   | C   | . SER SER SER A A 304 304 . | 0.5598 | 0.5819 | 0.5514 | 0.0101  | -0.0147 |   |
| 0.0050 | 1   | .   |                             |        |        |        |         |         |   |
| 2326   | O   | O   | . SER SER SER A A 304 304 . | 0.5627 | 0.5960 | 0.5497 | 0.0207  | -0.0256 |   |
| 0.0079 | 1   | .   |                             |        |        |        |         |         |   |
| 2327   | N   | N   | . LYS LYS LYS A A 305 305 . | 0.5679 | 0.5865 | 0.5604 | 0.0111  | -0.0172 |   |
| 0.0041 | 1   | .   |                             |        |        |        |         |         |   |
| 2328   | CA  | CA  | . LYS LYS LYS A A 305 305 . | 0.5835 | 0.5882 | 0.5819 | 0.0032  | -0.0114 | - |
| 0.0007 | 1   | .   |                             |        |        |        |         |         |   |
| 2329   | CB  | CB  | . LYS LYS LYS A A 305 305 . | 0.5851 | 0.5936 | 0.5981 | 0.0033  | -0.0049 | - |
| 0.0077 | 1   | .   |                             |        |        |        |         |         |   |
| 2330   | CG  | CG  | . LYS LYS LYS A A 305 305 . | 0.5939 | 0.6063 | 0.6130 | -0.0108 | -0.0105 | - |
| 0.0186 | 1   | .   |                             |        |        |        |         |         |   |
| 2331   | CD  | CD  | . LYS LYS LYS A A 305 305 . | 0.6216 | 0.6315 | 0.6101 | 0.0082  | 0.0095  | - |
| 0.0293 | 1   | .   |                             |        |        |        |         |         |   |
| 2332   | CE  | CE  | . LYS LYS LYS A A 305 305 . | 0.6464 | 0.6823 | 0.6352 | 0.0212  | 0.0068  | - |
| 0.0180 | 1   | .   |                             |        |        |        |         |         |   |
| 2333   | NZ  | NZ  | . LYS LYS LYS A A 305 305 . | 0.7064 | 0.7269 | 0.7139 | -0.0110 | 0.0181  | - |
| 0.0006 | 1   | .   |                             |        |        |        |         |         |   |
| 2334   | C   | C   | . LYS LYS LYS A A 305 305 . | 0.5882 | 0.5970 | 0.5779 | 0.0091  | -0.0138 | - |
| 0.0061 | 1   | .   |                             |        |        |        |         |         |   |
| 2335   | O   | O   | . LYS LYS LYS A A 305 305 . | 0.5988 | 0.6152 | 0.5604 | 0.0224  | -0.0159 | - |
| 0.0087 | 1   | .   |                             |        |        |        |         |         |   |
| 2336   | N   | N   | . PHE PHE PHE A A 306 306 . | 0.5868 | 0.5883 | 0.5756 | 0.0042  | -0.0144 | - |
| 0.0018 | 1   | .   |                             |        |        |        |         |         |   |
| 2337   | CA  | CA  | . PHE PHE PHE A A 306 306 . | 0.5891 | 0.5925 | 0.5712 | 0.0073  | -0.0122 | - |
| 0.0034 | 1   | .   |                             |        |        |        |         |         |   |
| 2338   | CB  | CB  | . PHE PHE PHE A A 306 306 . | 0.5992 | 0.5932 | 0.5746 | 0.0075  | -0.0054 | - |
| 0.0057 | 1   | .   |                             |        |        |        |         |         |   |
| 2339   | CG  | CG  | . PHE PHE PHE A A 306 306 . | 0.6031 | 0.5943 | 0.5778 | 0.0064  | -0.0056 | - |
| 0.0041 | 1   | .   |                             |        |        |        |         |         |   |
| 2340   | CD1 | CD1 | . PHE PHE PHE A A 306 306 . | 0.6099 | 0.5930 | 0.5849 | -0.0045 | -0.0331 | - |
| 0.0152 | 1   | .   |                             |        |        |        |         |         |   |
| 2341   | CE1 | CE1 | . PHE PHE PHE A A 306 306 . | 0.6180 | 0.5910 | 0.6003 | 0.0021  | -0.0361 | - |
| 0.0409 | 1   | .   |                             |        |        |        |         |         |   |
| 2342   | CZ  | CZ  | . PHE PHE PHE A A 306 306 . | 0.5899 | 0.5844 | 0.6063 | 0.0127  | -0.0208 | - |
| 0.0365 | 1   | .   |                             |        |        |        |         |         |   |
| 2343   | CE2 | CE2 | . PHE PHE PHE A A 306 306 . | 0.6003 | 0.6091 | 0.6242 | 0.0116  | -0.0160 | - |
| 0.0026 | 1   | .   |                             |        |        |        |         |         |   |
| 2344   | CD2 | CD2 | . PHE PHE PHE A A 306 306 . | 0.5964 | 0.6085 | 0.5740 | 0.0078  | -0.0190 | - |
| 0.0112 | 1   | .   |                             |        |        |        |         |         |   |
| 2345   | C   | C   | . PHE PHE PHE A A 306 306 . | 0.5846 | 0.5891 | 0.5654 | 0.0067  | -0.0141 | - |
| 0.0046 | 1   | .   |                             |        |        |        |         |         |   |
| 2346   | O   | O   | . PHE PHE PHE A A 306 306 . | 0.5918 | 0.6047 | 0.5683 | 0.0108  | -0.0296 | - |
| 0.0102 | 1   | .   |                             |        |        |        |         |         |   |
| 2347   | N   | N   | . THR THR THR A A 307 307 . | 0.5791 | 0.5765 | 0.5627 | 0.0027  | -0.0118 | - |
| 0.0016 | 1   | .   |                             |        |        |        |         |         |   |
| 2348   | CA  | CA  | . THR THR THR A A 307 307 . | 0.5725 | 0.5834 | 0.5672 | -0.0003 | -0.0166 | - |
| 0.0005 | 1   | .   |                             |        |        |        |         |         |   |
| 2349   | CB  | CB  | . THR THR THR A A 307 307 . | 0.5819 | 0.5878 | 0.5665 | 0.0004  | -0.0138 | - |
| 0.0076 | 1   | .   |                             |        |        |        |         |         |   |
| 2350   | OG1 | OG1 | . THR THR THR A A 307 307 . | 0.5671 | 0.6049 | 0.5575 | 0.0022  | -0.0515 | - |
| 0.0298 | 1   | .   |                             |        |        |        |         |         |   |
| 2351   | CG2 | CG2 | . THR THR THR A A 307 307 . | 0.5525 | 0.5863 | 0.5293 | -0.0073 | -0.0257 | - |
| 0.0131 | 1   | .   |                             |        |        |        |         |         |   |
| 2352   | C   | C   | . THR THR THR A A 307 307 . | 0.5762 | 0.5811 | 0.5700 | 0.0020  | -0.0188 | - |
| 0.0008 | 1   | .   |                             |        |        |        |         |         |   |

|        |     |     |                             |        |        |        |         |         |   |
|--------|-----|-----|-----------------------------|--------|--------|--------|---------|---------|---|
| 2353   | O   | O   | . THR THR THR A A 307 307 . | 0.5802 | 0.5795 | 0.5706 | 0.0062  | -0.0297 |   |
| 0.0012 | 1   | .   |                             |        |        |        |         |         |   |
| 2354   | N   | N   | . ALA ALA ALA A A 308 308 . | 0.5807 | 0.5799 | 0.5772 | 0.0030  | -0.0146 |   |
| 0.0002 | 1   | .   |                             |        |        |        |         |         |   |
| 2355   | CA  | CA  | . ALA ALA ALA A A 308 308 . | 0.5821 | 0.5788 | 0.5799 | 0.0039  | -0.0159 | - |
| 0.0015 | 1   | .   |                             |        |        |        |         |         |   |
| 2356   | CB  | CB  | . ALA ALA ALA A A 308 308 . | 0.5872 | 0.5745 | 0.5789 | 0.0040  | -0.0080 |   |
| 0.0013 | 1   | .   |                             |        |        |        |         |         |   |
| 2357   | C   | C   | . ALA ALA ALA A A 308 308 . | 0.5779 | 0.5762 | 0.5821 | 0.0057  | -0.0130 |   |
| 0.0019 | 1   | .   |                             |        |        |        |         |         |   |
| 2358   | O   | O   | . ALA ALA ALA A A 308 308 . | 0.5588 | 0.5576 | 0.5746 | 0.0152  | -0.0220 | - |
| 0.0029 | 1   | .   |                             |        |        |        |         |         |   |
| 2359   | N   | N   | . ASN ASN ASN A A 309 309 . | 0.5660 | 0.5861 | 0.5841 | -0.0028 | -0.0082 |   |
| 0.0047 | 1   | .   |                             |        |        |        |         |         |   |
| 2360   | CA  | CA  | . ASN ASN ASN A A 309 309 . | 0.5723 | 0.6012 | 0.5881 | -0.0047 | -0.0074 | - |
| 0.0049 | 1   | .   |                             |        |        |        |         |         |   |
| 2361   | CB  | CB  | . ASN ASN ASN A A 309 309 . | 0.5840 | 0.6316 | 0.6021 | -0.0136 | 0.0000  | - |
| 0.0040 | 1   | .   |                             |        |        |        |         |         |   |
| 2362   | CG  | CG  | . ASN ASN ASN A A 309 309 . | 0.6017 | 0.7215 | 0.6294 | -0.0287 | -0.0028 | - |
| 0.0166 | 1   | .   |                             |        |        |        |         |         |   |
| 2363   | OD1 | OD1 | . ASN ASN ASN A A 309 309 . | 0.6411 | 0.8386 | 0.6593 | -0.0234 | 0.0157  | - |
| 0.0360 | 1   | .   |                             |        |        |        |         |         |   |
| 2364   | ND2 | ND2 | . ASN ASN ASN A A 309 309 . | 0.6174 | 0.8222 | 0.6101 | -0.0286 | 0.0185  |   |
| 0.0122 | 1   | .   |                             |        |        |        |         |         |   |
| 2365   | C   | C   | . ASN ASN ASN A A 309 309 . | 0.5577 | 0.5799 | 0.5744 | -0.0031 | -0.0051 | - |
| 0.0081 | 1   | .   |                             |        |        |        |         |         |   |
| 2366   | O   | O   | . ASN ASN ASN A A 309 309 . | 0.5592 | 0.5911 | 0.5785 | -0.0010 | -0.0085 | - |
| 0.0139 | 1   | .   |                             |        |        |        |         |         |   |
| 2367   | N   | N   | . VAL VAL VAL A A 310 310 . | 0.5549 | 0.5587 | 0.5538 | -0.0024 | -0.0132 | - |
| 0.0092 | 1   | .   |                             |        |        |        |         |         |   |
| 2368   | CA  | CA  | . VAL VAL VAL A A 310 310 . | 0.5394 | 0.5510 | 0.5260 | -0.0061 | -0.0104 | - |
| 0.0103 | 1   | .   |                             |        |        |        |         |         |   |
| 2369   | CB  | CB  | . VAL VAL VAL A A 310 310 . | 0.5482 | 0.5555 | 0.5270 | -0.0048 | -0.0109 | - |
| 0.0066 | 1   | .   |                             |        |        |        |         |         |   |
| 2370   | CG1 | CG1 | . VAL VAL VAL A A 310 310 . | 0.5637 | 0.5747 | 0.5418 | 0.0033  | 0.0044  |   |
| 0.0000 | 1   | .   |                             |        |        |        |         |         |   |
| 2371   | CG2 | CG2 | . VAL VAL VAL A A 310 310 . | 0.5740 | 0.5471 | 0.4934 | -0.0156 | -0.0440 | - |
| 0.0125 | 1   | .   |                             |        |        |        |         |         |   |
| 2372   | C   | C   | . VAL VAL VAL A A 310 310 . | 0.5115 | 0.5317 | 0.4977 | -0.0062 | -0.0046 | - |
| 0.0133 | 1   | .   |                             |        |        |        |         |         |   |
| 2373   | O   | O   | . VAL VAL VAL A A 310 310 . | 0.5025 | 0.5290 | 0.4838 | -0.0135 | -0.0042 | - |
| 0.0147 | 1   | .   |                             |        |        |        |         |         |   |
| 2374   | N   | N   | . GLY GLY GLY A A 311 311 . | 0.4856 | 0.5249 | 0.4746 | -0.0075 | -0.0126 | - |
| 0.0153 | 1   | .   |                             |        |        |        |         |         |   |
| 2375   | CA  | CA  | . GLY GLY GLY A A 311 311 . | 0.4926 | 0.5146 | 0.4618 | 0.0023  | -0.0017 | - |
| 0.0142 | 1   | .   |                             |        |        |        |         |         |   |
| 2376   | C   | C   | . GLY GLY GLY A A 311 311 . | 0.4771 | 0.5093 | 0.4715 | 0.0038  | 0.0016  | - |
| 0.0098 | 1   | .   |                             |        |        |        |         |         |   |
| 2377   | O   | O   | . GLY GLY GLY A A 311 311 . | 0.4887 | 0.5072 | 0.4507 | 0.0084  | 0.0360  | - |
| 0.0160 | 1   | .   |                             |        |        |        |         |         |   |
| 2378   | N   | N   | . ILE ILE ILE A A 312 312 . | 0.4671 | 0.4968 | 0.4644 | 0.0069  | -0.0012 | - |
| 0.0089 | 1   | .   |                             |        |        |        |         |         |   |
| 2379   | CA  | CA  | . ILE ILE ILE A A 312 312 . | 0.4745 | 0.4792 | 0.4715 | 0.0061  | -0.0006 | - |
| 0.0018 | 1   | .   |                             |        |        |        |         |         |   |
| 2380   | CB  | CB  | . ILE ILE ILE A A 312 312 . | 0.4642 | 0.4815 | 0.4736 | 0.0085  | 0.0076  | - |
| 0.0014 | 1   | .   |                             |        |        |        |         |         |   |
| 2381   | CG1 | CG1 | . ILE ILE ILE A A 312 312 . | 0.4563 | 0.4899 | 0.5168 | 0.0028  | 0.0006  | - |
| 0.0124 | 1   | .   |                             |        |        |        |         |         |   |
| 2382   | CD1 | CD1 | . ILE ILE ILE A A 312 312 . | 0.4328 | 0.5032 | 0.5429 | 0.0079  | -0.0285 |   |
| 0.0362 | 1   | .   |                             |        |        |        |         |         |   |



|        |     |     |                             |        |        |        |         |         |   |
|--------|-----|-----|-----------------------------|--------|--------|--------|---------|---------|---|
| 2413   | O   | O   | . GLY GLY GLY A A 316 316 . | 0.3765 | 0.4248 | 0.3774 | 0.0089  | -0.0182 | - |
| 0.0335 | 1   | .   |                             |        |        |        |         |         |   |
| 2414   | N   | N   | . ASP ASP ASP A A 317 317 . | 0.3981 | 0.4192 | 0.3906 | 0.0074  | 0.0073  | - |
| 0.0095 | 1   | .   |                             |        |        |        |         |         |   |
| 2415   | CA  | CA  | . ASP ASP ASP A A 317 317 . | 0.3972 | 0.4224 | 0.3935 | 0.0097  | 0.0068  | - |
| 0.0026 | 1   | .   |                             |        |        |        |         |         |   |
| 2416   | CB  | CB  | . ASP ASP ASP A A 317 317 . | 0.3832 | 0.4196 | 0.4066 | 0.0094  | 0.0083  | - |
| 0.0023 | 1   | .   |                             |        |        |        |         |         |   |
| 2417   | CG  | CG  | . ASP ASP ASP A A 317 317 . | 0.3692 | 0.4394 | 0.4119 | 0.0101  | -0.0016 | - |
| 0.0010 | 1   | .   |                             |        |        |        |         |         |   |
| 2418   | OD1 | OD1 | . ASP ASP ASP A A 317 317 . | 0.2635 | 0.4186 | 0.4340 | 0.0425  | -0.0393 | - |
| 0.0170 | 1   | .   |                             |        |        |        |         |         |   |
| 2419   | OD2 | OD2 | . ASP ASP ASP A A 317 317 . | 0.4366 | 0.4806 | 0.4818 | 0.0009  | -0.0313 | - |
| 0.0415 | 1   | .   |                             |        |        |        |         |         |   |
| 2420   | C   | C   | . ASP ASP ASP A A 317 317 . | 0.4076 | 0.4158 | 0.4015 | 0.0038  | 0.0045  | - |
| 0.0032 | 1   | .   |                             |        |        |        |         |         |   |
| 2421   | O   | O   | . ASP ASP ASP A A 317 317 . | 0.4084 | 0.4116 | 0.3698 | -0.0002 | 0.0059  | - |
| 0.0036 | 1   | .   |                             |        |        |        |         |         |   |
| 2422   | N   | N   | . ASP ASP ASP A A 318 318 . | 0.4161 | 0.4303 | 0.4063 | 0.0143  | 0.0060  | - |
| 0.0059 | 1   | .   |                             |        |        |        |         |         |   |
| 2423   | CA  | CA  | . ASP ASP ASP A A 318 318 . | 0.4291 | 0.4331 | 0.4258 | 0.0108  | 0.0013  | - |
| 0.0036 | 1   | .   |                             |        |        |        |         |         |   |
| 2424   | CB  | CB  | . ASP ASP ASP A A 318 318 . | 0.4296 | 0.4476 | 0.4313 | 0.0185  | 0.0070  | - |
| 0.0068 | 1   | .   |                             |        |        |        |         |         |   |
| 2425   | CG  | CG  | . ASP ASP ASP A A 318 318 . | 0.4830 | 0.4860 | 0.4726 | 0.0168  | 0.0124  | - |
| 0.0047 | 1   | .   |                             |        |        |        |         |         |   |
| 2426   | OD1 | OD1 | . ASP ASP ASP A A 318 318 . | 0.5252 | 0.5413 | 0.5148 | 0.0424  | -0.0247 | - |
| 0.0189 | 1   | .   |                             |        |        |        |         |         |   |
| 2427   | OD2 | OD2 | . ASP ASP ASP A A 318 318 . | 0.5144 | 0.5197 | 0.4999 | 0.0189  | 0.0480  | - |
| 0.0219 | 1   | .   |                             |        |        |        |         |         |   |
| 2428   | C   | C   | . ASP ASP ASP A A 318 318 . | 0.4198 | 0.4340 | 0.4210 | 0.0120  | -0.0101 | - |
| 0.0075 | 1   | .   |                             |        |        |        |         |         |   |
| 2429   | O   | O   | . ASP ASP ASP A A 318 318 . | 0.4116 | 0.4416 | 0.4345 | -0.0021 | -0.0246 | - |
| 0.0028 | 1   | .   |                             |        |        |        |         |         |   |
| 2430   | N   | N   | . LEU LEU LEU A A 319 319 . | 0.4068 | 0.4316 | 0.4219 | 0.0170  | -0.0098 | - |
| 0.0041 | 1   | .   |                             |        |        |        |         |         |   |
| 2431   | CA  | CA  | . LEU LEU LEU A A 319 319 . | 0.4012 | 0.4237 | 0.4111 | 0.0072  | -0.0062 | - |
| 0.0022 | 1   | .   |                             |        |        |        |         |         |   |
| 2432   | CB  | CB  | . LEU LEU LEU A A 319 319 . | 0.3749 | 0.4027 | 0.4126 | 0.0091  | -0.0088 | - |
| 0.0063 | 1   | .   |                             |        |        |        |         |         |   |
| 2433   | CG  | CG  | . LEU LEU LEU A A 319 319 . | 0.3157 | 0.3998 | 0.4074 | 0.0059  | -0.0085 | - |
| 0.0010 | 1   | .   |                             |        |        |        |         |         |   |
| 2434   | CD1 | CD1 | . LEU LEU LEU A A 319 319 . | 0.2688 | 0.3656 | 0.4088 | 0.0074  | -0.0014 | - |
| 0.0431 | 1   | .   |                             |        |        |        |         |         |   |
| 2435   | CD2 | CD2 | . LEU LEU LEU A A 319 319 . | 0.1877 | 0.4427 | 0.4281 | 0.0381  | 0.0169  | - |
| 0.0266 | 1   | .   |                             |        |        |        |         |         |   |
| 2436   | C   | C   | . LEU LEU LEU A A 319 319 . | 0.4265 | 0.4247 | 0.4255 | 0.0120  | -0.0136 | - |
| 0.0007 | 1   | .   |                             |        |        |        |         |         |   |
| 2437   | O   | O   | . LEU LEU LEU A A 319 319 . | 0.4484 | 0.4216 | 0.4253 | 0.0343  | -0.0258 | - |
| 0.0169 | 1   | .   |                             |        |        |        |         |         |   |
| 2438   | N   | N   | . THR THR THR A A 320 320 . | 0.4164 | 0.4283 | 0.4200 | 0.0135  | -0.0153 | - |
| 0.0042 | 1   | .   |                             |        |        |        |         |         |   |
| 2439   | CA  | CA  | . THR THR THR A A 320 320 . | 0.4110 | 0.4205 | 0.3995 | 0.0039  | -0.0098 | - |
| 0.0014 | 1   | .   |                             |        |        |        |         |         |   |
| 2440   | CB  | CB  | . THR THR THR A A 320 320 . | 0.4214 | 0.4233 | 0.4006 | 0.0066  | -0.0189 | - |
| 0.0013 | 1   | .   |                             |        |        |        |         |         |   |
| 2441   | OG1 | OG1 | . THR THR THR A A 320 320 . | 0.4214 | 0.4447 | 0.3765 | -0.0072 | -0.0431 | - |
| 0.0062 | 1   | .   |                             |        |        |        |         |         |   |
| 2442   | CG2 | CG2 | . THR THR THR A A 320 320 . | 0.4254 | 0.4182 | 0.3831 | 0.0193  | 0.0079  | - |
| 0.0056 | 1   | .   |                             |        |        |        |         |         |   |

|        |     |     |                             |        |        |        |         |         |   |
|--------|-----|-----|-----------------------------|--------|--------|--------|---------|---------|---|
| 2443   | C   | C   | . THR THR THR A A 320 320 . | 0.4120 | 0.4123 | 0.4051 | 0.0043  | -0.0028 |   |
| 0.0001 | 1   | .   |                             |        |        |        |         |         |   |
| 2444   | O   | O   | . THR THR THR A A 320 320 . | 0.4205 | 0.4311 | 0.4129 | -0.0037 | -0.0012 | - |
| 0.0059 | 1   | .   |                             |        |        |        |         |         |   |
| 2445   | N   | N   | . VAL VAL VAL A A 321 321 . | 0.3964 | 0.4004 | 0.3961 | 0.0020  | 0.0034  | - |
| 0.0009 | 1   | .   |                             |        |        |        |         |         |   |
| 2446   | CA  | CA  | . VAL VAL VAL A A 321 321 . | 0.3905 | 0.3944 | 0.3840 | 0.0029  | -0.0018 |   |
| 0.0063 | 1   | .   |                             |        |        |        |         |         |   |
| 2447   | CB  | CB  | . VAL VAL VAL A A 321 321 . | 0.3950 | 0.3855 | 0.3913 | 0.0014  | -0.0040 |   |
| 0.0071 | 1   | .   |                             |        |        |        |         |         |   |
| 2448   | CG1 | CG1 | . VAL VAL VAL A A 321 321 . | 0.4046 | 0.3755 | 0.3914 | -0.0023 | 0.0066  |   |
| 0.0187 | 1   | .   |                             |        |        |        |         |         |   |
| 2449   | CG2 | CG2 | . VAL VAL VAL A A 321 321 . | 0.4399 | 0.4134 | 0.3784 | -0.0204 | -0.0133 |   |
| 0.0177 | 1   | .   |                             |        |        |        |         |         |   |
| 2450   | C   | C   | . VAL VAL VAL A A 321 321 . | 0.3891 | 0.3904 | 0.3804 | 0.0007  | -0.0047 |   |
| 0.0023 | 1   | .   |                             |        |        |        |         |         |   |
| 2451   | O   | O   | . VAL VAL VAL A A 321 321 . | 0.3848 | 0.4074 | 0.3755 | 0.0047  | -0.0059 |   |
| 0.0004 | 1   | .   |                             |        |        |        |         |         |   |
| 2452   | N   | N   | . THR THR THR A A 322 322 . | 0.3815 | 0.3895 | 0.3854 | 0.0065  | -0.0004 | - |
| 0.0017 | 1   | .   |                             |        |        |        |         |         |   |
| 2453   | CA  | CA  | . THR THR THR A A 322 322 . | 0.3786 | 0.4016 | 0.3840 | 0.0030  | -0.0135 | - |
| 0.0080 | 1   | .   |                             |        |        |        |         |         |   |
| 2454   | CB  | CB  | . THR THR THR A A 322 322 . | 0.3746 | 0.4024 | 0.3777 | 0.0005  | -0.0107 | - |
| 0.0056 | 1   | .   |                             |        |        |        |         |         |   |
| 2455   | OG1 | OG1 | . THR THR THR A A 322 322 . | 0.3388 | 0.4334 | 0.3357 | 0.0055  | -0.0635 | - |
| 0.0241 | 1   | .   |                             |        |        |        |         |         |   |
| 2456   | CG2 | CG2 | . THR THR THR A A 322 322 . | 0.3677 | 0.4062 | 0.3438 | 0.0350  | -0.0169 | - |
| 0.0174 | 1   | .   |                             |        |        |        |         |         |   |
| 2457   | C   | C   | . THR THR THR A A 322 322 . | 0.4059 | 0.4220 | 0.4024 | 0.0016  | -0.0081 | - |
| 0.0076 | 1   | .   |                             |        |        |        |         |         |   |
| 2458   | O   | O   | . THR THR THR A A 322 322 . | 0.4038 | 0.4224 | 0.4096 | -0.0038 | -0.0070 | - |
| 0.0028 | 1   | .   |                             |        |        |        |         |         |   |
| 2459   | N   | N   | . ASN ASN ASN A A 323 323 . | 0.4492 | 0.4537 | 0.4317 | 0.0043  | -0.0147 | - |
| 0.0067 | 1   | .   |                             |        |        |        |         |         |   |
| 2460   | CA  | CA  | . ASN ASN ASN A A 323 323 . | 0.4874 | 0.4663 | 0.4523 | 0.0018  | -0.0109 | - |
| 0.0039 | 1   | .   |                             |        |        |        |         |         |   |
| 2461   | CB  | CB  | . ASN ASN ASN A A 323 323 . | 0.5152 | 0.4796 | 0.4522 | 0.0092  | -0.0075 | - |
| 0.0076 | 1   | .   |                             |        |        |        |         |         |   |
| 2462   | CG  | CG  | . ASN ASN ASN A A 323 323 . | 0.6054 | 0.4936 | 0.4775 | 0.0183  | -0.0038 |   |
| 0.0144 | 1   | .   |                             |        |        |        |         |         |   |
| 2463   | OD1 | OD1 | . ASN ASN ASN A A 323 323 . | 0.6964 | 0.5779 | 0.4724 | -0.0139 | 0.0643  |   |
| 0.0142 | 1   | .   |                             |        |        |        |         |         |   |
| 2464   | ND2 | ND2 | . ASN ASN ASN A A 323 323 . | 0.6437 | 0.4953 | 0.4327 | 0.0305  | -0.0387 |   |
| 0.0403 | 1   | .   |                             |        |        |        |         |         |   |
| 2465   | C   | C   | . ASN ASN ASN A A 323 323 . | 0.4930 | 0.4787 | 0.4685 | 0.0011  | -0.0040 | - |
| 0.0003 | 1   | .   |                             |        |        |        |         |         |   |
| 2466   | O   | O   | . ASN ASN ASN A A 323 323 . | 0.5120 | 0.4654 | 0.4435 | 0.0063  | -0.0056 |   |
| 0.0011 | 1   | .   |                             |        |        |        |         |         |   |
| 2467   | N   | N   | . PRO PRO PRO A A 324 324 . | 0.5140 | 0.4956 | 0.4907 | -0.0020 | -0.0049 |   |
| 0.0015 | 1   | .   |                             |        |        |        |         |         |   |
| 2468   | CA  | CA  | . PRO PRO PRO A A 324 324 . | 0.5291 | 0.5191 | 0.5108 | -0.0039 | -0.0048 |   |
| 0.0013 | 1   | .   |                             |        |        |        |         |         |   |
| 2469   | CB  | CB  | . PRO PRO PRO A A 324 324 . | 0.5300 | 0.5225 | 0.5147 | -0.0050 | -0.0042 | - |
| 0.0004 | 1   | .   |                             |        |        |        |         |         |   |
| 2470   | CG  | CG  | . PRO PRO PRO A A 324 324 . | 0.5357 | 0.5213 | 0.5076 | 0.0055  | -0.0012 |   |
| 0.0021 | 1   | .   |                             |        |        |        |         |         |   |
| 2471   | CD  | CD  | . PRO PRO PRO A A 324 324 . | 0.5013 | 0.4952 | 0.4995 | -0.0006 | -0.0069 |   |
| 0.0093 | 1   | .   |                             |        |        |        |         |         |   |
| 2472   | C   | C   | . PRO PRO PRO A A 324 324 . | 0.5414 | 0.5312 | 0.5274 | 0.0036  | -0.0031 |   |
| 0.0039 | 1   | .   |                             |        |        |        |         |         |   |



|        |     |     |                             |        |        |        |         |           |
|--------|-----|-----|-----------------------------|--------|--------|--------|---------|-----------|
| 2473   | O   | O   | . PRO PRO PRO A A 324 324 . | 0.5584 | 0.5395 | 0.5320 | -0.0079 | -0.0088   |
| 0.0013 | 1   | .   |                             |        |        |        |         |           |
| 2474   | N   | N   | . LYS LYS LYS A A 325 325 . | 0.5568 | 0.5435 | 0.5331 | 0.0090  | 0.0045    |
| 0.0037 | 1   | .   |                             |        |        |        |         |           |
| 2475   | CA  | CA  | . LYS LYS LYS A A 325 325 . | 0.5580 | 0.5609 | 0.5475 | 0.0087  | -0.0017   |
| 0.0124 | 1   | .   |                             |        |        |        |         |           |
| 2476   | CB  | CB  | . LYS LYS LYS A A 325 325 . | 0.5689 | 0.5650 | 0.5626 | 0.0140  | 0.0081    |
| 0.0192 | 1   | .   |                             |        |        |        |         |           |
| 2477   | CG  | CG  | . LYS LYS LYS A A 325 325 . | 0.6101 | 0.6333 | 0.6252 | 0.0067  | -0.0149   |
| 0.0449 | 1   | .   |                             |        |        |        |         |           |
| 2478   | CD  | CD  | . LYS LYS LYS A A 325 325 . | 0.6711 | 0.6896 | 0.6952 | -0.0412 | -0.0158   |
| 0.0666 | 1   | .   |                             |        |        |        |         |           |
| 2479   | CE  | CE  | . LYS LYS LYS A A 325 325 . | 0.7307 | 0.7072 | 0.7085 | -0.0522 | -0.0545   |
| 0.0399 | 1   | .   |                             |        |        |        |         |           |
| 2480   | NZ  | NZ  | . LYS LYS LYS A A 325 325 . | 0.7674 | 0.7410 | 0.6720 | -0.0856 | -0.0958   |
| 0.0203 | 1   | .   |                             |        |        |        |         |           |
| 2481   | C   | C   | . LYS LYS LYS A A 325 325 . | 0.5576 | 0.5546 | 0.5323 | 0.0081  | 0.0004    |
| 0.0111 | 1   | .   |                             |        |        |        |         |           |
| 2482   | O   | O   | . LYS LYS LYS A A 325 325 . | 0.5679 | 0.5683 | 0.5264 | 0.0258  | -0.0016   |
| 0.0210 | 1   | .   |                             |        |        |        |         |           |
| 2483   | N   | N   | . ARG ARG ARG A A 326 326 . | 0.5476 | 0.5441 | 0.5147 | 0.0032  | -0.0024   |
| 0.0104 | 1   | .   |                             |        |        |        |         |           |
| 2484   | CA  | CA  | . ARG ARG ARG A A 326 326 . | 0.5272 | 0.5176 | 0.5043 | -0.0019 | 0.0014    |
| 0.0077 | 1   | .   |                             |        |        |        |         |           |
| 2485   | CB  | CB  | . ARG ARG ARG A A 326 326 . | 0.5318 | 0.5184 | 0.5104 | -0.0096 | 0.0015    |
| 0.0059 | 1   | .   |                             |        |        |        |         |           |
| 2486   | CG  | CG  | . ARG ARG ARG A A 326 326 . | 0.5512 | 0.5265 | 0.5186 | 0.0026  | -0.0049 - |
| 0.0109 | 1   | .   |                             |        |        |        |         |           |
| 2487   | CD  | CD  | . ARG ARG ARG A A 326 326 . | 0.5803 | 0.5886 | 0.5530 | 0.0278  | 0.0066    |
| 0.0024 | 1   | .   |                             |        |        |        |         |           |
| 2488   | NE  | NE  | . ARG ARG ARG A A 326 326 . | 0.6267 | 0.6543 | 0.5980 | 0.0507  | -0.0370 - |
| 0.0063 | 1   | .   |                             |        |        |        |         |           |
| 2489   | CZ  | CZ  | . ARG ARG ARG A A 326 326 . | 0.6371 | 0.6207 | 0.5806 | 0.0365  | -0.0511 - |
| 0.0087 | 1   | .   |                             |        |        |        |         |           |
| 2490   | NH1 | NH1 | . ARG ARG ARG A A 326 326 . | 0.6051 | 0.6026 | 0.4762 | 0.1061  | -0.1000   |
| 0.0176 | 1   | .   |                             |        |        |        |         |           |
| 2491   | NH2 | NH2 | . ARG ARG ARG A A 326 326 . | 0.6957 | 0.6580 | 0.6158 | 0.0836  | -0.0187 - |
| 0.0461 | 1   | .   |                             |        |        |        |         |           |
| 2492   | C   | C   | . ARG ARG ARG A A 326 326 . | 0.5125 | 0.5117 | 0.4983 | -0.0032 | 0.0009    |
| 0.0156 | 1   | .   |                             |        |        |        |         |           |
| 2493   | O   | O   | . ARG ARG ARG A A 326 326 . | 0.4989 | 0.4996 | 0.4740 | -0.0035 | -0.0072   |
| 0.0213 | 1   | .   |                             |        |        |        |         |           |
| 2494   | N   | N   | . ILE ILE ILE A A 327 327 . | 0.4930 | 0.5043 | 0.4974 | 0.0045  | -0.0021   |
| 0.0154 | 1   | .   |                             |        |        |        |         |           |
| 2495   | CA  | CA  | . ILE ILE ILE A A 327 327 . | 0.4927 | 0.5004 | 0.4979 | 0.0062  | -0.0053   |
| 0.0034 | 1   | .   |                             |        |        |        |         |           |
| 2496   | CB  | CB  | . ILE ILE ILE A A 327 327 . | 0.4858 | 0.4933 | 0.4836 | 0.0189  | -0.0175   |
| 0.0015 | 1   | .   |                             |        |        |        |         |           |
| 2497   | CG1 | CG1 | . ILE ILE ILE A A 327 327 . | 0.4601 | 0.4729 | 0.4966 | 0.0256  | -0.0247 - |
| 0.0157 | 1   | .   |                             |        |        |        |         |           |
| 2498   | CD1 | CD1 | . ILE ILE ILE A A 327 327 . | 0.4719 | 0.4193 | 0.4451 | 0.0533  | -0.0892   |
| 0.0088 | 1   | .   |                             |        |        |        |         |           |
| 2499   | CG2 | CG2 | . ILE ILE ILE A A 327 327 . | 0.4453 | 0.4501 | 0.4726 | 0.0117  | -0.0112   |
| 0.0055 | 1   | .   |                             |        |        |        |         |           |
| 2500   | C   | C   | . ILE ILE ILE A A 327 327 . | 0.5133 | 0.5172 | 0.5173 | 0.0068  | -0.0069   |
| 0.0048 | 1   | .   |                             |        |        |        |         |           |
| 2501   | O   | O   | . ILE ILE ILE A A 327 327 . | 0.5219 | 0.5190 | 0.5210 | 0.0005  | 0.0029    |
| 0.0005 | 1   | .   |                             |        |        |        |         |           |
| 2502   | N   | N   | . GLU GLU GLU A A 328 328 . | 0.5318 | 0.5288 | 0.5370 | 0.0029  | -0.0016   |
| 0.0041 | 1   | .   |                             |        |        |        |         |           |

|        |     |     |                             |        |        |        |         |         |   |
|--------|-----|-----|-----------------------------|--------|--------|--------|---------|---------|---|
| 2503   | CA  | CA  | . GLU GLU GLU A A 328 328 . | 0.5531 | 0.5462 | 0.5402 | 0.0047  | -0.0022 |   |
| 0.0086 | 1   | .   |                             |        |        |        |         |         |   |
| 2504   | CB  | CB  | . GLU GLU GLU A A 328 328 . | 0.5644 | 0.5391 | 0.5447 | 0.0072  | -0.0002 |   |
| 0.0003 | 1   | .   |                             |        |        |        |         |         |   |
| 2505   | CG  | CG  | . GLU GLU GLU A A 328 328 . | 0.6085 | 0.6007 | 0.6370 | -0.0040 | -0.0044 |   |
| 0.0117 | 1   | .   |                             |        |        |        |         |         |   |
| 2506   | CD  | CD  | . GLU GLU GLU A A 328 328 . | 0.6770 | 0.6891 | 0.7194 | -0.0085 | 0.0145  |   |
| 0.0090 | 1   | .   |                             |        |        |        |         |         |   |
| 2507   | OE1 | OE1 | . GLU GLU GLU A A 328 328 . | 0.6878 | 0.7135 | 0.7930 | -0.0333 | -0.0074 |   |
| 0.0270 | 1   | .   |                             |        |        |        |         |         |   |
| 2508   | OE2 | OE2 | . GLU GLU GLU A A 328 328 . | 0.7129 | 0.6901 | 0.7716 | -0.0200 | -0.0128 |   |
| 0.0118 | 1   | .   |                             |        |        |        |         |         |   |
| 2509   | C   | C   | . GLU GLU GLU A A 328 328 . | 0.5582 | 0.5464 | 0.5386 | 0.0133  | -0.0053 |   |
| 0.0088 | 1   | .   |                             |        |        |        |         |         |   |
| 2510   | O   | O   | . GLU GLU GLU A A 328 328 . | 0.5915 | 0.5400 | 0.5279 | 0.0211  | -0.0039 |   |
| 0.0165 | 1   | .   |                             |        |        |        |         |         |   |
| 2511   | N   | N   | . ARG ARG ARG A A 329 329 . | 0.5520 | 0.5600 | 0.5384 | 0.0154  | -0.0057 |   |
| 0.0065 | 1   | .   |                             |        |        |        |         |         |   |
| 2512   | CA  | CA  | . ARG ARG ARG A A 329 329 . | 0.5519 | 0.5601 | 0.5505 | 0.0078  | -0.0050 |   |
| 0.0054 | 1   | .   |                             |        |        |        |         |         |   |
| 2513   | CB  | CB  | . ARG ARG ARG A A 329 329 . | 0.5426 | 0.5650 | 0.5581 | 0.0167  | -0.0061 |   |
| 0.0016 | 1   | .   |                             |        |        |        |         |         |   |
| 2514   | CG  | CG  | . ARG ARG ARG A A 329 329 . | 0.5575 | 0.5701 | 0.6093 | 0.0072  | 0.0164  | - |
| 0.0036 | 1   | .   |                             |        |        |        |         |         |   |
| 2515   | CD  | CD  | . ARG ARG ARG A A 329 329 . | 0.5614 | 0.5949 | 0.6493 | 0.0088  | 0.0477  | - |
| 0.0189 | 1   | .   |                             |        |        |        |         |         |   |
| 2516   | NE  | NE  | . ARG ARG ARG A A 329 329 . | 0.5317 | 0.5958 | 0.6438 | 0.0298  | 0.0213  | - |
| 0.0215 | 1   | .   |                             |        |        |        |         |         |   |
| 2517   | CZ  | CZ  | . ARG ARG ARG A A 329 329 . | 0.5115 | 0.5989 | 0.6595 | 0.0424  | 0.0035  | - |
| 0.0331 | 1   | .   |                             |        |        |        |         |         |   |
| 2518   | NH1 | NH1 | . ARG ARG ARG A A 329 329 . | 0.3774 | 0.5529 | 0.6535 | 0.0511  | 0.0274  | - |
| 0.0746 | 1   | .   |                             |        |        |        |         |         |   |
| 2519   | NH2 | NH2 | . ARG ARG ARG A A 329 329 . | 0.5019 | 0.5579 | 0.7183 | 0.0496  | -0.0433 | - |
| 0.0032 | 1   | .   |                             |        |        |        |         |         |   |
| 2520   | C   | C   | . ARG ARG ARG A A 329 329 . | 0.5522 | 0.5635 | 0.5495 | 0.0117  | -0.0110 | - |
| 0.0014 | 1   | .   |                             |        |        |        |         |         |   |
| 2521   | O   | O   | . ARG ARG ARG A A 329 329 . | 0.5589 | 0.5831 | 0.5393 | 0.0148  | -0.0161 | - |
| 0.0064 | 1   | .   |                             |        |        |        |         |         |   |
| 2522   | N   | N   | . ALA ALA ALA A A 330 330 . | 0.5492 | 0.5518 | 0.5415 | 0.0096  | -0.0148 |   |
| 0.0044 | 1   | .   |                             |        |        |        |         |         |   |
| 2523   | CA  | CA  | . ALA ALA ALA A A 330 330 . | 0.5499 | 0.5389 | 0.5335 | 0.0016  | -0.0151 |   |
| 0.0077 | 1   | .   |                             |        |        |        |         |         |   |
| 2524   | CB  | CB  | . ALA ALA ALA A A 330 330 . | 0.5257 | 0.5352 | 0.5275 | 0.0017  | -0.0187 |   |
| 0.0001 | 1   | .   |                             |        |        |        |         |         |   |
| 2525   | C   | C   | . ALA ALA ALA A A 330 330 . | 0.5489 | 0.5362 | 0.5286 | 0.0054  | -0.0146 |   |
| 0.0166 | 1   | .   |                             |        |        |        |         |         |   |
| 2526   | O   | O   | . ALA ALA ALA A A 330 330 . | 0.5671 | 0.5408 | 0.5014 | 0.0152  | -0.0315 |   |
| 0.0293 | 1   | .   |                             |        |        |        |         |         |   |
| 2527   | N   | N   | . VAL VAL VAL A A 331 331 . | 0.5361 | 0.5343 | 0.5315 | 0.0077  | -0.0151 |   |
| 0.0162 | 1   | .   |                             |        |        |        |         |         |   |
| 2528   | CA  | CA  | . VAL VAL VAL A A 331 331 . | 0.5486 | 0.5429 | 0.5398 | 0.0039  | -0.0104 |   |
| 0.0042 | 1   | .   |                             |        |        |        |         |         |   |
| 2529   | CB  | CB  | . VAL VAL VAL A A 331 331 . | 0.5336 | 0.5318 | 0.5325 | 0.0005  | -0.0085 |   |
| 0.0012 | 1   | .   |                             |        |        |        |         |         |   |
| 2530   | CG1 | CG1 | . VAL VAL VAL A A 331 331 . | 0.5454 | 0.5245 | 0.5360 | -0.0043 | 0.0137  | - |
| 0.0025 | 1   | .   |                             |        |        |        |         |         |   |
| 2531   | CG2 | CG2 | . VAL VAL VAL A A 331 331 . | 0.5284 | 0.4843 | 0.5060 | -0.0155 | 0.0149  | - |
| 0.0182 | 1   | .   |                             |        |        |        |         |         |   |
| 2532   | C   | C   | . VAL VAL VAL A A 331 331 . | 0.5605 | 0.5685 | 0.5639 | 0.0035  | -0.0212 |   |
| 0.0019 | 1   | .   |                             |        |        |        |         |         |   |

|        |     |     |                             |        |        |        |         |         |   |
|--------|-----|-----|-----------------------------|--------|--------|--------|---------|---------|---|
| 2533   | O   | O   | . VAL VAL VAL A A 331 331 . | 0.5735 | 0.5807 | 0.5527 | 0.0114  | -0.0414 |   |
| 0.0084 | 1   | .   |                             |        |        |        |         |         |   |
| 2534   | N   | N   | . GLU GLU GLU A A 332 332 . | 0.5810 | 0.5798 | 0.5887 | 0.0031  | -0.0193 |   |
| 0.0081 | 1   | .   |                             |        |        |        |         |         |   |
| 2535   | CA  | CA  | . GLU GLU GLU A A 332 332 . | 0.6113 | 0.6035 | 0.6095 | -0.0019 | -0.0194 |   |
| 0.0077 | 1   | .   |                             |        |        |        |         |         |   |
| 2536   | CB  | CB  | . GLU GLU GLU A A 332 332 . | 0.6418 | 0.6189 | 0.6169 | -0.0058 | -0.0247 |   |
| 0.0094 | 1   | .   |                             |        |        |        |         |         |   |
| 2537   | CG  | CG  | . GLU GLU GLU A A 332 332 . | 0.6877 | 0.6743 | 0.7045 | 0.0226  | -0.0259 |   |
| 0.0196 | 1   | .   |                             |        |        |        |         |         |   |
| 2538   | CD  | CD  | . GLU GLU GLU A A 332 332 . | 0.7992 | 0.7494 | 0.7498 | 0.0169  | -0.0066 |   |
| 0.0235 | 1   | .   |                             |        |        |        |         |         |   |
| 2539   | OE1 | OE1 | . GLU GLU GLU A A 332 332 . | 0.8288 | 0.7399 | 0.8252 | 0.0172  | -0.0222 |   |
| 0.0248 | 1   | .   |                             |        |        |        |         |         |   |
| 2540   | OE2 | OE2 | . GLU GLU GLU A A 332 332 . | 0.8432 | 0.7637 | 0.8001 | 0.0392  | 0.0186  |   |
| 0.0153 | 1   | .   |                             |        |        |        |         |         |   |
| 2541   | C   | C   | . GLU GLU GLU A A 332 332 . | 0.6076 | 0.6004 | 0.6044 | -0.0105 | -0.0123 |   |
| 0.0058 | 1   | .   |                             |        |        |        |         |         |   |
| 2542   | O   | O   | . GLU GLU GLU A A 332 332 . | 0.6113 | 0.5996 | 0.6105 | -0.0236 | -0.0100 |   |
| 0.0100 | 1   | .   |                             |        |        |        |         |         |   |
| 2543   | N   | N   | . GLU GLU GLU A A 333 333 . | 0.5997 | 0.5944 | 0.5978 | -0.0115 | -0.0064 |   |
| 0.0022 | 1   | .   |                             |        |        |        |         |         |   |
| 2544   | CA  | CA  | . GLU GLU GLU A A 333 333 . | 0.5959 | 0.6038 | 0.6054 | -0.0044 | -0.0089 | - |
| 0.0028 | 1   | .   |                             |        |        |        |         |         |   |
| 2545   | CB  | CB  | . GLU GLU GLU A A 333 333 . | 0.5890 | 0.6193 | 0.6170 | -0.0084 | -0.0030 | - |
| 0.0016 | 1   | .   |                             |        |        |        |         |         |   |
| 2546   | CG  | CG  | . GLU GLU GLU A A 333 333 . | 0.6334 | 0.6497 | 0.6879 | -0.0231 | -0.0113 |   |
| 0.0031 | 1   | .   |                             |        |        |        |         |         |   |
| 2547   | CD  | CD  | . GLU GLU GLU A A 333 333 . | 0.6911 | 0.7299 | 0.7287 | -0.0329 | 0.0007  | - |
| 0.0010 | 1   | .   |                             |        |        |        |         |         |   |
| 2548   | OE1 | OE1 | . GLU GLU GLU A A 333 333 . | 0.6933 | 0.7428 | 0.7595 | -0.0492 | -0.0352 | - |
| 0.0041 | 1   | .   |                             |        |        |        |         |         |   |
| 2549   | OE2 | OE2 | . GLU GLU GLU A A 333 333 . | 0.7097 | 0.7543 | 0.8043 | -0.0654 | -0.0263 |   |
| 0.0328 | 1   | .   |                             |        |        |        |         |         |   |
| 2550   | C   | C   | . GLU GLU GLU A A 333 333 . | 0.5910 | 0.6018 | 0.5934 | -0.0024 | -0.0106 | - |
| 0.0010 | 1   | .   |                             |        |        |        |         |         |   |
| 2551   | O   | O   | . GLU GLU GLU A A 333 333 . | 0.5768 | 0.6082 | 0.5901 | -0.0013 | -0.0149 |   |
| 0.0000 | 1   | .   |                             |        |        |        |         |         |   |
| 2552   | N   | N   | . LYS LYS LYS A A 334 334 . | 0.5910 | 0.5850 | 0.5759 | 0.0024  | -0.0070 | - |
| 0.0100 | 1   | .   |                             |        |        |        |         |         |   |
| 2553   | CA  | CA  | . LYS LYS LYS A A 334 334 . | 0.5887 | 0.5860 | 0.5677 | 0.0011  | -0.0066 | - |
| 0.0030 | 1   | .   |                             |        |        |        |         |         |   |
| 2554   | CB  | CB  | . LYS LYS LYS A A 334 334 . | 0.5922 | 0.5910 | 0.5842 | 0.0007  | -0.0062 | - |
| 0.0122 | 1   | .   |                             |        |        |        |         |         |   |
| 2555   | CG  | CG  | . LYS LYS LYS A A 334 334 . | 0.6145 | 0.6311 | 0.6015 | 0.0068  | -0.0114 |   |
| 0.0078 | 1   | .   |                             |        |        |        |         |         |   |
| 2556   | CD  | CD  | . LYS LYS LYS A A 334 334 . | 0.6554 | 0.7161 | 0.6877 | 0.0242  | -0.0647 |   |
| 0.0006 | 1   | .   |                             |        |        |        |         |         |   |
| 2557   | CE  | CE  | . LYS LYS LYS A A 334 334 . | 0.6995 | 0.7648 | 0.7083 | 0.0268  | -0.0939 |   |
| 0.0049 | 1   | .   |                             |        |        |        |         |         |   |
| 2558   | NZ  | NZ  | . LYS LYS LYS A A 334 334 . | 0.6972 | 0.8104 | 0.6161 | 0.0789  | -0.1303 |   |
| 0.0214 | 1   | .   |                             |        |        |        |         |         |   |
| 2559   | C   | C   | . LYS LYS LYS A A 334 334 . | 0.5798 | 0.5661 | 0.5478 | 0.0042  | -0.0165 | - |
| 0.0046 | 1   | .   |                             |        |        |        |         |         |   |
| 2560   | O   | O   | . LYS LYS LYS A A 334 334 . | 0.6047 | 0.5626 | 0.5440 | -0.0084 | -0.0284 | - |
| 0.0043 | 1   | .   |                             |        |        |        |         |         |   |
| 2561   | N   | N   | . ALA ALA ALA A A 335 335 . | 0.5510 | 0.5427 | 0.5250 | 0.0135  | -0.0122 | - |
| 0.0042 | 1   | .   |                             |        |        |        |         |         |   |
| 2562   | CA  | CA  | . ALA ALA ALA A A 335 335 . | 0.5228 | 0.5163 | 0.5008 | 0.0138  | -0.0132 | - |
| 0.0029 | 1   | .   |                             |        |        |        |         |         |   |

|        |     |     |                             |        |        |        |         |         |   |
|--------|-----|-----|-----------------------------|--------|--------|--------|---------|---------|---|
| 2563   | CB  | CB  | . ALA ALA ALA A A 335 335 . | 0.5185 | 0.5205 | 0.4981 | 0.0215  | -0.0117 | - |
| 0.0093 | 1   | .   |                             |        |        |        |         |         |   |
| 2564   | C   | C   | . ALA ALA ALA A A 335 335 . | 0.4957 | 0.5052 | 0.4803 | 0.0080  | -0.0143 | - |
| 0.0019 | 1   | .   |                             |        |        |        |         |         |   |
| 2565   | O   | O   | . ALA ALA ALA A A 335 335 . | 0.4848 | 0.5063 | 0.4853 | 0.0099  | -0.0186 |   |
| 0.0025 | 1   | .   |                             |        |        |        |         |         |   |
| 2566   | N   | N   | . CYS CYS CYS A A 336 336 . | 0.4708 | 0.4811 | 0.4511 | 0.0089  | -0.0172 |   |
| 0.0005 | 1   | .   |                             |        |        |        |         |         |   |
| 2567   | CA  | CA  | . CYS CYS CYS A A 336 336 . | 0.4604 | 0.4747 | 0.4485 | 0.0053  | -0.0174 | - |
| 0.0009 | 1   | .   |                             |        |        |        |         |         |   |
| 2568   | CB  | CB  | . CYS CYS CYS A A 336 336 . | 0.4515 | 0.4739 | 0.4588 | 0.0118  | -0.0235 |   |
| 0.0062 | 1   | .   |                             |        |        |        |         |         |   |
| 2569   | SG  | SG  | . CYS CYS CYS A A 336 336 . | 0.5180 | 0.5099 | 0.4595 | 0.0198  | -0.0986 |   |
| 0.0188 | 1   | .   |                             |        |        |        |         |         |   |
| 2570   | C   | C   | . CYS CYS CYS A A 336 336 . | 0.4633 | 0.4580 | 0.4397 | 0.0045  | -0.0125 | - |
| 0.0037 | 1   | .   |                             |        |        |        |         |         |   |
| 2571   | O   | O   | . CYS CYS CYS A A 336 336 . | 0.4768 | 0.4453 | 0.4141 | -0.0020 | -0.0129 | - |
| 0.0003 | 1   | .   |                             |        |        |        |         |         |   |
| 2572   | N   | N   | . ASN ASN ASN A A 337 337 . | 0.4509 | 0.4361 | 0.4268 | 0.0063  | -0.0131 | - |
| 0.0014 | 1   | .   |                             |        |        |        |         |         |   |
| 2573   | CA  | CA  | . ASN ASN ASN A A 337 337 . | 0.4371 | 0.4307 | 0.4256 | 0.0138  | -0.0180 | - |
| 0.0007 | 1   | .   |                             |        |        |        |         |         |   |
| 2574   | CB  | CB  | . ASN ASN ASN A A 337 337 . | 0.4312 | 0.4355 | 0.4263 | 0.0119  | -0.0219 | - |
| 0.0013 | 1   | .   |                             |        |        |        |         |         |   |
| 2575   | CG  | CG  | . ASN ASN ASN A A 337 337 . | 0.4566 | 0.4595 | 0.4469 | 0.0115  | -0.0550 |   |
| 0.0071 | 1   | .   |                             |        |        |        |         |         |   |
| 2576   | OD1 | OD1 | . ASN ASN ASN A A 337 337 . | 0.4339 | 0.5234 | 0.4590 | 0.0278  | -0.1149 |   |
| 0.0207 | 1   | .   |                             |        |        |        |         |         |   |
| 2577   | ND2 | ND2 | . ASN ASN ASN A A 337 337 . | 0.4522 | 0.5216 | 0.3809 | 0.0334  | -0.0813 | - |
| 0.0001 | 1   | .   |                             |        |        |        |         |         |   |
| 2578   | C   | C   | . ASN ASN ASN A A 337 337 . | 0.4432 | 0.4250 | 0.4095 | 0.0223  | -0.0166 |   |
| 0.0040 | 1   | .   |                             |        |        |        |         |         |   |
| 2579   | O   | O   | . ASN ASN ASN A A 337 337 . | 0.4607 | 0.4087 | 0.3976 | 0.0374  | -0.0213 |   |
| 0.0127 | 1   | .   |                             |        |        |        |         |         |   |
| 2580   | N   | N   | . CYS CYS CYS A A 338 338 . | 0.4404 | 0.4132 | 0.4109 | 0.0243  | -0.0153 |   |
| 0.0117 | 1   | .   |                             |        |        |        |         |         |   |
| 2581   | CA  | CA  | . CYS CYS CYS A A 338 338 . | 0.4242 | 0.4144 | 0.4070 | 0.0237  | -0.0175 |   |
| 0.0011 | 1   | .   |                             |        |        |        |         |         |   |
| 2582   | CB  | CB  | . CYS CYS CYS A A 338 338 . | 0.4305 | 0.4207 | 0.4075 | 0.0339  | -0.0324 |   |
| 0.0055 | 1   | .   |                             |        |        |        |         |         |   |
| 2583   | SG  | SG  | . CYS CYS CYS A A 338 338 . | 0.3983 | 0.4441 | 0.4879 | 0.0905  | -0.0120 |   |
| 0.0068 | 1   | .   |                             |        |        |        |         |         |   |
| 2584   | C   | C   | . CYS CYS CYS A A 338 338 . | 0.4110 | 0.4094 | 0.3952 | 0.0131  | -0.0113 |   |
| 0.0005 | 1   | .   |                             |        |        |        |         |         |   |
| 2585   | O   | O   | . CYS CYS CYS A A 338 338 . | 0.3935 | 0.4198 | 0.4251 | 0.0261  | -0.0208 | - |
| 0.0026 | 1   | .   |                             |        |        |        |         |         |   |
| 2586   | N   | N   | . LEU LEU LEU A A 339 339 . | 0.3921 | 0.4115 | 0.3663 | 0.0142  | -0.0084 | - |
| 0.0032 | 1   | .   |                             |        |        |        |         |         |   |
| 2587   | CA  | CA  | . LEU LEU LEU A A 339 339 . | 0.4009 | 0.4144 | 0.3729 | 0.0119  | -0.0101 |   |
| 0.0029 | 1   | .   |                             |        |        |        |         |         |   |
| 2588   | CB  | CB  | . LEU LEU LEU A A 339 339 . | 0.4156 | 0.4021 | 0.3725 | 0.0155  | -0.0142 |   |
| 0.0030 | 1   | .   |                             |        |        |        |         |         |   |
| 2589   | CG  | CG  | . LEU LEU LEU A A 339 339 . | 0.4160 | 0.4205 | 0.3396 | 0.0260  | -0.0126 | - |
| 0.0030 | 1   | .   |                             |        |        |        |         |         |   |
| 2590   | CD1 | CD1 | . LEU LEU LEU A A 339 339 . | 0.4251 | 0.4050 | 0.2796 | 0.0845  | -0.0687 |   |
| 0.0133 | 1   | .   |                             |        |        |        |         |         |   |
| 2591   | CD2 | CD2 | . LEU LEU LEU A A 339 339 . | 0.3870 | 0.4332 | 0.3475 | 0.0293  | -0.0033 | - |
| 0.0383 | 1   | .   |                             |        |        |        |         |         |   |
| 2592   | C   | C   | . LEU LEU LEU A A 339 339 . | 0.3963 | 0.4160 | 0.3540 | 0.0150  | -0.0112 | - |
| 0.0004 | 1   | .   |                             |        |        |        |         |         |   |

|        |     |     |                             |        |        |        |         |         |   |
|--------|-----|-----|-----------------------------|--------|--------|--------|---------|---------|---|
| 2593   | O   | O   | . LEU LEU LEU A A 339 339 . | 0.3846 | 0.4159 | 0.3164 | 0.0271  | -0.0225 | - |
| 0.0102 | 1   | .   |                             |        |        |        |         |         |   |
| 2594   | N   | N   | . LEU LEU LEU A A 340 340 . | 0.3889 | 0.4136 | 0.3719 | 0.0089  | -0.0072 |   |
| 0.0076 | 1   | .   |                             |        |        |        |         |         |   |
| 2595   | CA  | CA  | . LEU LEU LEU A A 340 340 . | 0.3859 | 0.4055 | 0.3669 | 0.0045  | -0.0039 |   |
| 0.0064 | 1   | .   |                             |        |        |        |         |         |   |
| 2596   | CB  | CB  | . LEU LEU LEU A A 340 340 . | 0.3791 | 0.4190 | 0.3835 | 0.0053  | -0.0033 |   |
| 0.0098 | 1   | .   |                             |        |        |        |         |         |   |
| 2597   | CG  | CG  | . LEU LEU LEU A A 340 340 . | 0.3629 | 0.3984 | 0.4147 | 0.0174  | -0.0063 |   |
| 0.0006 | 1   | .   |                             |        |        |        |         |         |   |
| 2598   | CD1 | CD1 | . LEU LEU LEU A A 340 340 . | 0.3483 | 0.4147 | 0.3919 | 0.0416  | -0.0463 | - |
| 0.0500 | 1   | .   |                             |        |        |        |         |         |   |
| 2599   | CD2 | CD2 | . LEU LEU LEU A A 340 340 . | 0.4427 | 0.3719 | 0.3624 | 0.0034  | -0.0223 | - |
| 0.0753 | 1   | .   |                             |        |        |        |         |         |   |
| 2600   | C   | C   | . LEU LEU LEU A A 340 340 . | 0.3912 | 0.3865 | 0.3662 | 0.0058  | 0.0037  |   |
| 0.0051 | 1   | .   |                             |        |        |        |         |         |   |
| 2601   | O   | O   | . LEU LEU LEU A A 340 340 . | 0.4134 | 0.3696 | 0.3540 | 0.0173  | 0.0178  | - |
| 0.0078 | 1   | .   |                             |        |        |        |         |         |   |
| 2602   | N   | N   | . LEU LEU LEU A A 341 341 . | 0.3616 | 0.3845 | 0.3635 | 0.0028  | 0.0016  |   |
| 0.0056 | 1   | .   |                             |        |        |        |         |         |   |
| 2603   | CA  | CA  | . LEU LEU LEU A A 341 341 . | 0.3684 | 0.3827 | 0.3625 | 0.0050  | 0.0052  | - |
| 0.0044 | 1   | .   |                             |        |        |        |         |         |   |
| 2604   | CB  | CB  | . LEU LEU LEU A A 341 341 . | 0.3593 | 0.3779 | 0.3539 | 0.0007  | 0.0067  |   |
| 0.0089 | 1   | .   |                             |        |        |        |         |         |   |
| 2605   | CG  | CG  | . LEU LEU LEU A A 341 341 . | 0.3795 | 0.4336 | 0.3843 | 0.0146  | 0.0010  |   |
| 0.0077 | 1   | .   |                             |        |        |        |         |         |   |
| 2606   | CD1 | CD1 | . LEU LEU LEU A A 341 341 . | 0.3570 | 0.4001 | 0.4633 | 0.0206  | 0.0120  |   |
| 0.0397 | 1   | .   |                             |        |        |        |         |         |   |
| 2607   | CD2 | CD2 | . LEU LEU LEU A A 341 341 . | 0.3822 | 0.5134 | 0.4262 | 0.0301  | -0.0368 |   |
| 0.0036 | 1   | .   |                             |        |        |        |         |         |   |
| 2608   | C   | C   | . LEU LEU LEU A A 341 341 . | 0.3560 | 0.3782 | 0.3617 | 0.0074  | 0.0044  | - |
| 0.0022 | 1   | .   |                             |        |        |        |         |         |   |
| 2609   | O   | O   | . LEU LEU LEU A A 341 341 . | 0.3482 | 0.3654 | 0.3619 | 0.0193  | 0.0141  | - |
| 0.0076 | 1   | .   |                             |        |        |        |         |         |   |
| 2610   | N   | N   | . LYS LYS LYS A A 342 342 . | 0.3405 | 0.3845 | 0.3569 | 0.0049  | 0.0009  | - |
| 0.0152 | 1   | .   |                             |        |        |        |         |         |   |
| 2611   | CA  | CA  | . LYS LYS LYS A A 342 342 . | 0.3417 | 0.3857 | 0.3489 | -0.0024 | 0.0070  |   |
| 0.0051 | 1   | .   |                             |        |        |        |         |         |   |
| 2612   | CB  | CB  | . LYS LYS LYS A A 342 342 . | 0.3217 | 0.3845 | 0.3391 | -0.0054 | 0.0093  | - |
| 0.0001 | 1   | .   |                             |        |        |        |         |         |   |
| 2613   | CG  | CG  | . LYS LYS LYS A A 342 342 . | 0.3007 | 0.3822 | 0.3163 | -0.0112 | -0.0058 |   |
| 0.0047 | 1   | .   |                             |        |        |        |         |         |   |
| 2614   | CD  | CD  | . LYS LYS LYS A A 342 342 . | 0.2826 | 0.3570 | 0.2744 | -0.0219 | 0.0087  |   |
| 0.0039 | 1   | .   |                             |        |        |        |         |         |   |
| 2615   | CE  | CE  | . LYS LYS LYS A A 342 342 . | 0.2753 | 0.3242 | 0.3439 | -0.0134 | -0.0019 | - |
| 0.0143 | 1   | .   |                             |        |        |        |         |         |   |
| 2616   | NZ  | NZ  | . LYS LYS LYS A A 342 342 . | 0.2652 | 0.3577 | 0.3670 | 0.0422  | -0.0053 | - |
| 0.0550 | 1   | .   |                             |        |        |        |         |         |   |
| 2617   | C   | C   | . LYS LYS LYS A A 342 342 . | 0.3508 | 0.3781 | 0.3522 | 0.0113  | 0.0011  | - |
| 0.0056 | 1   | .   |                             |        |        |        |         |         |   |
| 2618   | O   | O   | . LYS LYS LYS A A 342 342 . | 0.3693 | 0.3905 | 0.3419 | 0.0267  | -0.0020 |   |
| 0.0195 | 1   | .   |                             |        |        |        |         |         |   |
| 2619   | N   | N   | . VAL VAL VAL A A 343 343 . | 0.3677 | 0.3828 | 0.3498 | 0.0047  | -0.0067 |   |
| 0.0023 | 1   | .   |                             |        |        |        |         |         |   |
| 2620   | CA  | CA  | . VAL VAL VAL A A 343 343 . | 0.3646 | 0.3718 | 0.3581 | 0.0066  | -0.0005 |   |
| 0.0089 | 1   | .   |                             |        |        |        |         |         |   |
| 2621   | CB  | CB  | . VAL VAL VAL A A 343 343 . | 0.3687 | 0.3918 | 0.3478 | 0.0004  | -0.0061 |   |
| 0.0081 | 1   | .   |                             |        |        |        |         |         |   |
| 2622   | CG1 | CG1 | . VAL VAL VAL A A 343 343 . | 0.3213 | 0.3670 | 0.3275 | 0.0279  | -0.0108 |   |
| 0.0062 | 1   | .   |                             |        |        |        |         |         |   |



|        |     |     |                             |        |        |        |         |         |   |
|--------|-----|-----|-----------------------------|--------|--------|--------|---------|---------|---|
| 2653   | C   | C   | . GLY GLY GLY A A 347 347 . | 0.3491 | 0.3349 | 0.3499 | 0.0015  | -0.0165 |   |
| 0.0098 | 1   | .   |                             |        |        |        |         |         |   |
| 2654   | O   | O   | . GLY GLY GLY A A 347 347 . | 0.3637 | 0.3172 | 0.3663 | -0.0010 | -0.0190 |   |
| 0.0149 | 1   | .   |                             |        |        |        |         |         |   |
| 2655   | N   | N   | . SER SER SER A A 348 348 . | 0.3538 | 0.3507 | 0.3416 | -0.0032 | -0.0098 |   |
| 0.0090 | 1   | .   |                             |        |        |        |         |         |   |
| 2656   | CA  | CA  | . SER SER SER A A 348 348 . | 0.3750 | 0.3666 | 0.3597 | 0.0080  | -0.0021 |   |
| 0.0088 | 1   | .   |                             |        |        |        |         |         |   |
| 2657   | CB  | CB  | . SER SER SER A A 348 348 . | 0.4023 | 0.3755 | 0.3575 | 0.0136  | 0.0014  |   |
| 0.0150 | 1   | .   |                             |        |        |        |         |         |   |
| 2658   | OG  | OG  | . SER SER SER A A 348 348 . | 0.4372 | 0.4211 | 0.3658 | 0.0379  | -0.0023 |   |
| 0.0068 | 1   | .   |                             |        |        |        |         |         |   |
| 2659   | C   | C   | . SER SER SER A A 348 348 . | 0.3712 | 0.3722 | 0.3613 | 0.0003  | -0.0027 |   |
| 0.0134 | 1   | .   |                             |        |        |        |         |         |   |
| 2660   | O   | O   | . SER SER SER A A 348 348 . | 0.3592 | 0.3790 | 0.3521 | 0.0075  | -0.0187 |   |
| 0.0081 | 1   | .   |                             |        |        |        |         |         |   |
| 2661   | N   | N   | . VAL VAL VAL A A 349 349 . | 0.3479 | 0.3648 | 0.3625 | 0.0104  | 0.0021  |   |
| 0.0288 | 1   | .   |                             |        |        |        |         |         |   |
| 2662   | CA  | CA  | . VAL VAL VAL A A 349 349 . | 0.3659 | 0.3863 | 0.3631 | 0.0061  | 0.0004  |   |
| 0.0070 | 1   | .   |                             |        |        |        |         |         |   |
| 2663   | CB  | CB  | . VAL VAL VAL A A 349 349 . | 0.3729 | 0.3973 | 0.3696 | 0.0131  | 0.0071  |   |
| 0.0070 | 1   | .   |                             |        |        |        |         |         |   |
| 2664   | CG1 | CG1 | . VAL VAL VAL A A 349 349 . | 0.3531 | 0.4195 | 0.3275 | 0.0147  | 0.0299  | - |
| 0.0223 | 1   | .   |                             |        |        |        |         |         |   |
| 2665   | CG2 | CG2 | . VAL VAL VAL A A 349 349 . | 0.3594 | 0.3974 | 0.3505 | 0.0162  | -0.0007 |   |
| 0.0051 | 1   | .   |                             |        |        |        |         |         |   |
| 2666   | C   | C   | . VAL VAL VAL A A 349 349 . | 0.3921 | 0.4051 | 0.3909 | 0.0018  | 0.0001  |   |
| 0.0063 | 1   | .   |                             |        |        |        |         |         |   |
| 2667   | O   | O   | . VAL VAL VAL A A 349 349 . | 0.3948 | 0.4385 | 0.3850 | 0.0109  | 0.0040  |   |
| 0.0019 | 1   | .   |                             |        |        |        |         |         |   |
| 2668   | N   | N   | . THR THR THR A A 350 350 . | 0.4130 | 0.4189 | 0.3968 | -0.0057 | -0.0005 |   |
| 0.0078 | 1   | .   |                             |        |        |        |         |         |   |
| 2669   | CA  | CA  | . THR THR THR A A 350 350 . | 0.4392 | 0.4286 | 0.4108 | -0.0011 | -0.0183 |   |
| 0.0164 | 1   | .   |                             |        |        |        |         |         |   |
| 2670   | CB  | CB  | . THR THR THR A A 350 350 . | 0.4328 | 0.4319 | 0.4055 | -0.0108 | -0.0135 |   |
| 0.0160 | 1   | .   |                             |        |        |        |         |         |   |
| 2671   | OG1 | OG1 | . THR THR THR A A 350 350 . | 0.5005 | 0.4889 | 0.4115 | -0.0066 | -0.0203 |   |
| 0.0113 | 1   | .   |                             |        |        |        |         |         |   |
| 2672   | CG2 | CG2 | . THR THR THR A A 350 350 . | 0.4693 | 0.4576 | 0.4264 | -0.0112 | -0.0233 |   |
| 0.0286 | 1   | .   |                             |        |        |        |         |         |   |
| 2673   | C   | C   | . THR THR THR A A 350 350 . | 0.4220 | 0.4189 | 0.4111 | -0.0065 | -0.0094 |   |
| 0.0081 | 1   | .   |                             |        |        |        |         |         |   |
| 2674   | O   | O   | . THR THR THR A A 350 350 . | 0.4323 | 0.4117 | 0.4120 | 0.0001  | -0.0201 |   |
| 0.0220 | 1   | .   |                             |        |        |        |         |         |   |
| 2675   | N   | N   | . GLU GLU GLU A A 351 351 . | 0.4282 | 0.4184 | 0.4185 | 0.0016  | -0.0099 |   |
| 0.0084 | 1   | .   |                             |        |        |        |         |         |   |
| 2676   | CA  | CA  | . GLU GLU GLU A A 351 351 . | 0.4323 | 0.4193 | 0.4200 | 0.0062  | -0.0088 |   |
| 0.0048 | 1   | .   |                             |        |        |        |         |         |   |
| 2677   | CB  | CB  | . GLU GLU GLU A A 351 351 . | 0.4421 | 0.4297 | 0.4322 | 0.0021  | -0.0133 | - |
| 0.0072 | 1   | .   |                             |        |        |        |         |         |   |
| 2678   | CG  | CG  | . GLU GLU GLU A A 351 351 . | 0.4909 | 0.4388 | 0.4498 | 0.0144  | -0.0209 | - |
| 0.0020 | 1   | .   |                             |        |        |        |         |         |   |
| 2679   | CD  | CD  | . GLU GLU GLU A A 351 351 . | 0.4940 | 0.4523 | 0.4966 | -0.0007 | 0.0013  | - |
| 0.0189 | 1   | .   |                             |        |        |        |         |         |   |
| 2680   | OE1 | OE1 | . GLU GLU GLU A A 351 351 . | 0.5256 | 0.4603 | 0.4694 | -0.0766 | 0.0258  |   |
| 0.0045 | 1   | .   |                             |        |        |        |         |         |   |
| 2681   | OE2 | OE2 | . GLU GLU GLU A A 351 351 . | 0.4969 | 0.4670 | 0.5291 | 0.0075  | -0.0215 |   |
| 0.0028 | 1   | .   |                             |        |        |        |         |         |   |
| 2682   | C   | C   | . GLU GLU GLU A A 351 351 . | 0.4332 | 0.4339 | 0.4155 | 0.0042  | -0.0105 |   |
| 0.0035 | 1   | .   |                             |        |        |        |         |         |   |

|        |     |     |                             |        |        |        |         |         |   |
|--------|-----|-----|-----------------------------|--------|--------|--------|---------|---------|---|
| 2683   | O   | O   | . GLU GLU GLU A A 351 351 . | 0.4315 | 0.4638 | 0.4136 | 0.0169  | -0.0228 |   |
| 0.0224 | 1   | .   |                             |        |        |        |         |         |   |
| 2684   | N   | N   | . ALA ALA ALA A A 352 352 . | 0.4270 | 0.4172 | 0.3999 | 0.0004  | -0.0036 |   |
| 0.0041 | 1   | .   |                             |        |        |        |         |         |   |
| 2685   | CA  | CA  | . ALA ALA ALA A A 352 352 . | 0.4245 | 0.4127 | 0.3929 | -0.0044 | 0.0038  |   |
| 0.0011 | 1   | .   |                             |        |        |        |         |         |   |
| 2686   | CB  | CB  | . ALA ALA ALA A A 352 352 . | 0.4297 | 0.4080 | 0.3746 | -0.0055 | -0.0098 | - |
| 0.0024 | 1   | .   |                             |        |        |        |         |         |   |
| 2687   | C   | C   | . ALA ALA ALA A A 352 352 . | 0.4195 | 0.4130 | 0.3915 | -0.0120 | 0.0044  | - |
| 0.0008 | 1   | .   |                             |        |        |        |         |         |   |
| 2688   | O   | O   | . ALA ALA ALA A A 352 352 . | 0.4325 | 0.4060 | 0.3650 | -0.0234 | 0.0107  | - |
| 0.0127 | 1   | .   |                             |        |        |        |         |         |   |
| 2689   | N   | N   | . ILE ILE ILE A A 353 353 . | 0.4135 | 0.4108 | 0.4041 | -0.0141 | 0.0118  |   |
| 0.0028 | 1   | .   |                             |        |        |        |         |         |   |
| 2690   | CA  | CA  | . ILE ILE ILE A A 353 353 . | 0.4029 | 0.4109 | 0.4141 | -0.0095 | 0.0129  |   |
| 0.0000 | 1   | .   |                             |        |        |        |         |         |   |
| 2691   | CB  | CB  | . ILE ILE ILE A A 353 353 . | 0.4013 | 0.3982 | 0.4151 | -0.0056 | 0.0097  | - |
| 0.0069 | 1   | .   |                             |        |        |        |         |         |   |
| 2692   | CG1 | CG1 | . ILE ILE ILE A A 353 353 . | 0.3998 | 0.4229 | 0.4078 | -0.0241 | -0.0035 | - |
| 0.0210 | 1   | .   |                             |        |        |        |         |         |   |
| 2693   | CD1 | CD1 | . ILE ILE ILE A A 353 353 . | 0.3811 | 0.4172 | 0.4637 | -0.0307 | 0.0178  | - |
| 0.0171 | 1   | .   |                             |        |        |        |         |         |   |
| 2694   | CG2 | CG2 | . ILE ILE ILE A A 353 353 . | 0.3772 | 0.3922 | 0.4010 | -0.0460 | 0.0572  |   |
| 0.0083 | 1   | .   |                             |        |        |        |         |         |   |
| 2695   | C   | C   | . ILE ILE ILE A A 353 353 . | 0.4281 | 0.4393 | 0.4381 | -0.0101 | 0.0034  | - |
| 0.0060 | 1   | .   |                             |        |        |        |         |         |   |
| 2696   | O   | O   | . ILE ILE ILE A A 353 353 . | 0.4134 | 0.4561 | 0.4348 | -0.0111 | 0.0100  |   |
| 0.0003 | 1   | .   |                             |        |        |        |         |         |   |
| 2697   | N   | N   | . GLN GLN GLN A A 354 354 . | 0.4395 | 0.4598 | 0.4616 | 0.0002  | 0.0029  | - |
| 0.0041 | 1   | .   |                             |        |        |        |         |         |   |
| 2698   | CA  | CA  | . GLN GLN GLN A A 354 354 . | 0.4719 | 0.4824 | 0.4586 | -0.0132 | -0.0060 | - |
| 0.0033 | 1   | .   |                             |        |        |        |         |         |   |
| 2699   | CB  | CB  | . GLN GLN GLN A A 354 354 . | 0.4993 | 0.4913 | 0.4666 | -0.0240 | -0.0032 | - |
| 0.0047 | 1   | .   |                             |        |        |        |         |         |   |
| 2700   | CG  | CG  | . GLN GLN GLN A A 354 354 . | 0.5729 | 0.5615 | 0.5384 | -0.0400 | -0.0093 |   |
| 0.0196 | 1   | .   |                             |        |        |        |         |         |   |
| 2701   | CD  | CD  | . GLN GLN GLN A A 354 354 . | 0.6674 | 0.6136 | 0.6138 | -0.0346 | 0.0043  |   |
| 0.0095 | 1   | .   |                             |        |        |        |         |         |   |
| 2702   | OE1 | OE1 | . GLN GLN GLN A A 354 354 . | 0.7180 | 0.6932 | 0.6327 | -0.0859 | -0.0172 |   |
| 0.0235 | 1   | .   |                             |        |        |        |         |         |   |
| 2703   | NE2 | NE2 | . GLN GLN GLN A A 354 354 . | 0.6961 | 0.6605 | 0.6174 | -0.0377 | 0.0422  |   |
| 0.0516 | 1   | .   |                             |        |        |        |         |         |   |
| 2704   | C   | C   | . GLN GLN GLN A A 354 354 . | 0.4615 | 0.4772 | 0.4554 | -0.0187 | -0.0021 | - |
| 0.0116 | 1   | .   |                             |        |        |        |         |         |   |
| 2705   | O   | O   | . GLN GLN GLN A A 354 354 . | 0.4501 | 0.4892 | 0.4638 | -0.0188 | 0.0014  | - |
| 0.0262 | 1   | .   |                             |        |        |        |         |         |   |
| 2706   | N   | N   | . ALA ALA ALA A A 355 355 . | 0.4659 | 0.4694 | 0.4473 | -0.0197 | -0.0070 | - |
| 0.0100 | 1   | .   |                             |        |        |        |         |         |   |
| 2707   | CA  | CA  | . ALA ALA ALA A A 355 355 . | 0.4481 | 0.4673 | 0.4434 | -0.0022 | -0.0109 | - |
| 0.0040 | 1   | .   |                             |        |        |        |         |         |   |
| 2708   | CB  | CB  | . ALA ALA ALA A A 355 355 . | 0.4451 | 0.4612 | 0.4445 | -0.0010 | -0.0108 | - |
| 0.0156 | 1   | .   |                             |        |        |        |         |         |   |
| 2709   | C   | C   | . ALA ALA ALA A A 355 355 . | 0.4547 | 0.4735 | 0.4450 | 0.0029  | -0.0153 | - |
| 0.0019 | 1   | .   |                             |        |        |        |         |         |   |
| 2710   | O   | O   | . ALA ALA ALA A A 355 355 . | 0.4349 | 0.4715 | 0.4334 | -0.0029 | -0.0355 |   |
| 0.0022 | 1   | .   |                             |        |        |        |         |         |   |
| 2711   | N   | N   | . CYS CYS CYS A A 356 356 . | 0.4711 | 0.4814 | 0.4488 | 0.0205  | -0.0114 | - |
| 0.0025 | 1   | .   |                             |        |        |        |         |         |   |
| 2712   | CA  | CA  | . CYS CYS CYS A A 356 356 . | 0.4796 | 0.4733 | 0.4435 | 0.0255  | -0.0068 | - |
| 0.0031 | 1   | .   |                             |        |        |        |         |         |   |



|        |     |     |                             |        |        |        |         |         |   |
|--------|-----|-----|-----------------------------|--------|--------|--------|---------|---------|---|
| 2713   | CB  | CB  | . CYS CYS CYS A A 356 356 . | 0.4760 | 0.4746 | 0.4237 | 0.0344  | -0.0038 | - |
| 0.0005 | 1   | .   |                             |        |        |        |         |         |   |
| 2714   | SG  | SG  | . CYS CYS CYS A A 356 356 . | 0.5657 | 0.5022 | 0.4201 | 0.0565  | -0.0262 | - |
| 0.0054 | 1   | .   |                             |        |        |        |         |         |   |
| 2715   | C   | C   | . CYS CYS CYS A A 356 356 . | 0.4677 | 0.4739 | 0.4514 | 0.0203  | -0.0042 |   |
| 0.0032 | 1   | .   |                             |        |        |        |         |         |   |
| 2716   | O   | O   | . CYS CYS CYS A A 356 356 . | 0.4495 | 0.4610 | 0.4508 | 0.0311  | -0.0075 | - |
| 0.0043 | 1   | .   |                             |        |        |        |         |         |   |
| 2717   | N   | N   | . LYS LYS LYS A A 357 357 . | 0.4861 | 0.4764 | 0.4674 | 0.0069  | 0.0022  |   |
| 0.0096 | 1   | .   |                             |        |        |        |         |         |   |
| 2718   | CA  | CA  | . LYS LYS LYS A A 357 357 . | 0.5041 | 0.5003 | 0.4798 | 0.0001  | 0.0057  |   |
| 0.0056 | 1   | .   |                             |        |        |        |         |         |   |
| 2719   | CB  | CB  | . LYS LYS LYS A A 357 357 . | 0.4941 | 0.5226 | 0.4978 | -0.0076 | 0.0149  |   |
| 0.0160 | 1   | .   |                             |        |        |        |         |         |   |
| 2720   | CG  | CG  | . LYS LYS LYS A A 357 357 . | 0.5756 | 0.5973 | 0.5297 | 0.0033  | -0.0068 |   |
| 0.0224 | 1   | .   |                             |        |        |        |         |         |   |
| 2721   | CD  | CD  | . LYS LYS LYS A A 357 357 . | 0.6232 | 0.6862 | 0.6617 | -0.0376 | -0.0114 |   |
| 0.0406 | 1   | .   |                             |        |        |        |         |         |   |
| 2722   | CE  | CE  | . LYS LYS LYS A A 357 357 . | 0.7350 | 0.7151 | 0.7067 | -0.0369 | -0.0298 |   |
| 0.0353 | 1   | .   |                             |        |        |        |         |         |   |
| 2723   | NZ  | NZ  | . LYS LYS LYS A A 357 357 . | 0.8001 | 0.8011 | 0.7041 | -0.0324 | -0.0167 |   |
| 0.0540 | 1   | .   |                             |        |        |        |         |         |   |
| 2724   | C   | C   | . LYS LYS LYS A A 357 357 . | 0.4919 | 0.4821 | 0.4616 | 0.0031  | 0.0076  |   |
| 0.0067 | 1   | .   |                             |        |        |        |         |         |   |
| 2725   | O   | O   | . LYS LYS LYS A A 357 357 . | 0.5077 | 0.4745 | 0.4645 | 0.0065  | 0.0144  | - |
| 0.0020 | 1   | .   |                             |        |        |        |         |         |   |
| 2726   | N   | N   | . LEU LEU LEU A A 358 358 . | 0.4921 | 0.4768 | 0.4554 | 0.0006  | 0.0011  |   |
| 0.0093 | 1   | .   |                             |        |        |        |         |         |   |
| 2727   | CA  | CA  | . LEU LEU LEU A A 358 358 . | 0.4870 | 0.4888 | 0.4541 | 0.0080  | -0.0031 |   |
| 0.0129 | 1   | .   |                             |        |        |        |         |         |   |
| 2728   | CB  | CB  | . LEU LEU LEU A A 358 358 . | 0.4965 | 0.5029 | 0.4571 | 0.0255  | -0.0102 |   |
| 0.0156 | 1   | .   |                             |        |        |        |         |         |   |
| 2729   | CG  | CG  | . LEU LEU LEU A A 358 358 . | 0.4705 | 0.5545 | 0.4645 | 0.0235  | -0.0063 |   |
| 0.0056 | 1   | .   |                             |        |        |        |         |         |   |
| 2730   | CD1 | CD1 | . LEU LEU LEU A A 358 358 . | 0.4574 | 0.5764 | 0.4660 | 0.0642  | -0.0397 |   |
| 0.0013 | 1   | .   |                             |        |        |        |         |         |   |
| 2731   | CD2 | CD2 | . LEU LEU LEU A A 358 358 . | 0.4675 | 0.5807 | 0.4467 | 0.0290  | -0.0082 |   |
| 0.0163 | 1   | .   |                             |        |        |        |         |         |   |
| 2732   | C   | C   | . LEU LEU LEU A A 358 358 . | 0.4946 | 0.4825 | 0.4514 | 0.0057  | -0.0091 |   |
| 0.0145 | 1   | .   |                             |        |        |        |         |         |   |
| 2733   | O   | O   | . LEU LEU LEU A A 358 358 . | 0.5140 | 0.4923 | 0.4479 | 0.0099  | -0.0127 |   |
| 0.0358 | 1   | .   |                             |        |        |        |         |         |   |
| 2734   | N   | N   | . ALA ALA ALA A A 359 359 . | 0.4754 | 0.4723 | 0.4346 | 0.0017  | -0.0056 |   |
| 0.0115 | 1   | .   |                             |        |        |        |         |         |   |
| 2735   | CA  | CA  | . ALA ALA ALA A A 359 359 . | 0.4684 | 0.4486 | 0.4313 | 0.0095  | -0.0026 |   |
| 0.0080 | 1   | .   |                             |        |        |        |         |         |   |
| 2736   | CB  | CB  | . ALA ALA ALA A A 359 359 . | 0.4629 | 0.4473 | 0.4319 | 0.0151  | 0.0085  |   |
| 0.0019 | 1   | .   |                             |        |        |        |         |         |   |
| 2737   | C   | C   | . ALA ALA ALA A A 359 359 . | 0.4638 | 0.4430 | 0.4340 | 0.0051  | -0.0080 |   |
| 0.0121 | 1   | .   |                             |        |        |        |         |         |   |
| 2738   | O   | O   | . ALA ALA ALA A A 359 359 . | 0.4701 | 0.4388 | 0.4268 | 0.0141  | -0.0235 |   |
| 0.0065 | 1   | .   |                             |        |        |        |         |         |   |
| 2739   | N   | N   | . GLN GLN GLN A A 360 360 . | 0.4483 | 0.4460 | 0.4351 | 0.0087  | -0.0141 |   |
| 0.0178 | 1   | .   |                             |        |        |        |         |         |   |
| 2740   | CA  | CA  | . GLN GLN GLN A A 360 360 . | 0.4581 | 0.4662 | 0.4467 | 0.0032  | -0.0134 |   |
| 0.0136 | 1   | .   |                             |        |        |        |         |         |   |
| 2741   | CB  | CB  | . GLN GLN GLN A A 360 360 . | 0.4671 | 0.4649 | 0.4468 | 0.0212  | -0.0189 |   |
| 0.0210 | 1   | .   |                             |        |        |        |         |         |   |
| 2742   | CG  | CG  | . GLN GLN GLN A A 360 360 . | 0.4970 | 0.4930 | 0.4396 | 0.0223  | 0.0001  |   |
| 0.0189 | 1   | .   |                             |        |        |        |         |         |   |

|        |     |     |                             |        |        |        |         |         |   |
|--------|-----|-----|-----------------------------|--------|--------|--------|---------|---------|---|
| 2743   | CD  | CD  | . GLN GLN GLN A A 360 360 . | 0.5037 | 0.5056 | 0.4534 | -0.0036 | -0.0151 |   |
| 0.0392 | 1   | .   |                             |        |        |        |         |         |   |
| 2744   | OE1 | OE1 | . GLN GLN GLN A A 360 360 . | 0.5166 | 0.5130 | 0.4924 | 0.0118  | 0.0144  |   |
| 0.0089 | 1   | .   |                             |        |        |        |         |         |   |
| 2745   | NE2 | NE2 | . GLN GLN GLN A A 360 360 . | 0.5428 | 0.4777 | 0.5040 | -0.0109 | -0.0676 |   |
| 0.0359 | 1   | .   |                             |        |        |        |         |         |   |
| 2746   | C   | C   | . GLN GLN GLN A A 360 360 . | 0.4628 | 0.4715 | 0.4630 | 0.0023  | -0.0235 |   |
| 0.0143 | 1   | .   |                             |        |        |        |         |         |   |
| 2747   | O   | O   | . GLN GLN GLN A A 360 360 . | 0.4674 | 0.4736 | 0.4681 | 0.0030  | -0.0203 |   |
| 0.0227 | 1   | .   |                             |        |        |        |         |         |   |
| 2748   | N   | N   | . GLU GLU GLU A A 361 361 . | 0.4652 | 0.4933 | 0.4801 | -0.0076 | -0.0280 |   |
| 0.0127 | 1   | .   |                             |        |        |        |         |         |   |
| 2749   | CA  | CA  | . GLU GLU GLU A A 361 361 . | 0.4907 | 0.5149 | 0.4992 | -0.0139 | -0.0140 |   |
| 0.0148 | 1   | .   |                             |        |        |        |         |         |   |
| 2750   | CB  | CB  | . GLU GLU GLU A A 361 361 . | 0.5080 | 0.5237 | 0.5082 | -0.0184 | -0.0211 |   |
| 0.0186 | 1   | .   |                             |        |        |        |         |         |   |
| 2751   | CG  | CG  | . GLU GLU GLU A A 361 361 . | 0.5580 | 0.5875 | 0.5907 | -0.0256 | -0.0083 |   |
| 0.0172 | 1   | .   |                             |        |        |        |         |         |   |
| 2752   | CD  | CD  | . GLU GLU GLU A A 361 361 . | 0.6842 | 0.6281 | 0.6870 | -0.0069 | 0.0032  | - |
| 0.0105 | 1   | .   |                             |        |        |        |         |         |   |
| 2753   | OE1 | OE1 | . GLU GLU GLU A A 361 361 . | 0.7047 | 0.6524 | 0.7295 | 0.0228  | 0.0286  | - |
| 0.0010 | 1   | .   |                             |        |        |        |         |         |   |
| 2754   | OE2 | OE2 | . GLU GLU GLU A A 361 361 . | 0.6862 | 0.6961 | 0.7141 | -0.0178 | 0.0212  |   |
| 0.0092 | 1   | .   |                             |        |        |        |         |         |   |
| 2755   | C   | C   | . GLU GLU GLU A A 361 361 . | 0.4949 | 0.5207 | 0.4843 | -0.0186 | -0.0131 |   |
| 0.0106 | 1   | .   |                             |        |        |        |         |         |   |
| 2756   | O   | O   | . GLU GLU GLU A A 361 361 . | 0.5065 | 0.5376 | 0.4979 | -0.0325 | 0.0019  |   |
| 0.0070 | 1   | .   |                             |        |        |        |         |         |   |
| 2757   | N   | N   | . ASN ASN ASN A A 362 362 . | 0.4916 | 0.5262 | 0.4823 | -0.0136 | -0.0167 |   |
| 0.0048 | 1   | .   |                             |        |        |        |         |         |   |
| 2758   | CA  | CA  | . ASN ASN ASN A A 362 362 . | 0.5052 | 0.5160 | 0.4838 | -0.0043 | -0.0104 |   |
| 0.0083 | 1   | .   |                             |        |        |        |         |         |   |
| 2759   | CB  | CB  | . ASN ASN ASN A A 362 362 . | 0.4951 | 0.5119 | 0.4858 | 0.0049  | -0.0190 |   |
| 0.0109 | 1   | .   |                             |        |        |        |         |         |   |
| 2760   | CG  | CG  | . ASN ASN ASN A A 362 362 . | 0.5353 | 0.5195 | 0.5179 | 0.0042  | -0.0320 |   |
| 0.0162 | 1   | .   |                             |        |        |        |         |         |   |
| 2761   | OD1 | OD1 | . ASN ASN ASN A A 362 362 . | 0.6327 | 0.5151 | 0.5399 | 0.0781  | -0.0546 |   |
| 0.0445 | 1   | .   |                             |        |        |        |         |         |   |
| 2762   | ND2 | ND2 | . ASN ASN ASN A A 362 362 . | 0.4662 | 0.5122 | 0.5410 | 0.0179  | -0.0335 |   |
| 0.0273 | 1   | .   |                             |        |        |        |         |         |   |
| 2763   | C   | C   | . ASN ASN ASN A A 362 362 . | 0.5096 | 0.5150 | 0.4654 | -0.0068 | -0.0031 |   |
| 0.0135 | 1   | .   |                             |        |        |        |         |         |   |
| 2764   | O   | O   | . ASN ASN ASN A A 362 362 . | 0.5308 | 0.5313 | 0.4519 | 0.0031  | -0.0240 |   |
| 0.0179 | 1   | .   |                             |        |        |        |         |         |   |
| 2765   | N   | N   | . GLY GLY GLY A A 363 363 . | 0.5066 | 0.5020 | 0.4513 | -0.0013 | 0.0119  |   |
| 0.0110 | 1   | .   |                             |        |        |        |         |         |   |
| 2766   | CA  | CA  | . GLY GLY GLY A A 363 363 . | 0.5319 | 0.5055 | 0.4675 | -0.0069 | 0.0169  |   |
| 0.0060 | 1   | .   |                             |        |        |        |         |         |   |
| 2767   | C   | C   | . GLY GLY GLY A A 363 363 . | 0.5400 | 0.5044 | 0.4795 | -0.0065 | 0.0123  |   |
| 0.0008 | 1   | .   |                             |        |        |        |         |         |   |
| 2768   | O   | O   | . GLY GLY GLY A A 363 363 . | 0.5441 | 0.4890 | 0.4702 | -0.0152 | 0.0176  | - |
| 0.0043 | 1   | .   |                             |        |        |        |         |         |   |
| 2769   | N   | N   | . TRP TRP TRP A A 364 364 . | 0.5345 | 0.5057 | 0.4699 | -0.0044 | -0.0009 |   |
| 0.0023 | 1   | .   |                             |        |        |        |         |         |   |
| 2770   | CA  | CA  | . TRP TRP TRP A A 364 364 . | 0.5117 | 0.5137 | 0.4715 | -0.0003 | -0.0040 | - |
| 0.0095 | 1   | .   |                             |        |        |        |         |         |   |
| 2771   | CB  | CB  | . TRP TRP TRP A A 364 364 . | 0.5205 | 0.5275 | 0.4801 | 0.0064  | -0.0051 | - |
| 0.0120 | 1   | .   |                             |        |        |        |         |         |   |
| 2772   | CG  | CG  | . TRP TRP TRP A A 364 364 . | 0.5473 | 0.5641 | 0.5303 | 0.0199  | -0.0180 | - |
| 0.0084 | 1   | .   |                             |        |        |        |         |         |   |







|        |     |     |                             |        |        |        |         |         |   |
|--------|-----|-----|-----------------------------|--------|--------|--------|---------|---------|---|
| 2863   | CA  | CA  | . GLU GLU GLU A A 376 376 . | 0.3302 | 0.3450 | 0.3501 | -0.0065 | 0.0069  |   |
| 0.0012 | 1   | .   |                             |        |        |        |         |         |   |
| 2864   | CB  | CB  | . GLU GLU GLU A A 376 376 . | 0.3240 | 0.3701 | 0.3587 | -0.0114 | 0.0155  |   |
| 0.0017 | 1   | .   |                             |        |        |        |         |         |   |
| 2865   | CG  | CG  | . GLU GLU GLU A A 376 376 . | 0.3273 | 0.3589 | 0.3619 | 0.0055  | 0.0088  | - |
| 0.0040 | 1   | .   |                             |        |        |        |         |         |   |
| 2866   | CD  | CD  | . GLU GLU GLU A A 376 376 . | 0.3802 | 0.4436 | 0.3750 | -0.0174 | -0.0091 | - |
| 0.0196 | 1   | .   |                             |        |        |        |         |         |   |
| 2867   | OE1 | OE1 | . GLU GLU GLU A A 376 376 . | 0.3383 | 0.4503 | 0.3913 | -0.0471 | -0.0005 | - |
| 0.0440 | 1   | .   |                             |        |        |        |         |         |   |
| 2868   | OE2 | OE2 | . GLU GLU GLU A A 376 376 . | 0.4133 | 0.4251 | 0.4169 | -0.0282 | -0.0870 |   |
| 0.0159 | 1   | .   |                             |        |        |        |         |         |   |
| 2869   | C   | C   | . GLU GLU GLU A A 376 376 . | 0.3490 | 0.3447 | 0.3387 | 0.0015  | -0.0013 | - |
| 0.0028 | 1   | .   |                             |        |        |        |         |         |   |
| 2870   | O   | O   | . GLU GLU GLU A A 376 376 . | 0.3642 | 0.3509 | 0.3451 | 0.0072  | 0.0122  | - |
| 0.0216 | 1   | .   |                             |        |        |        |         |         |   |
| 2871   | N   | N   | . ASP ASP ASP A A 377 377 . | 0.3542 | 0.3599 | 0.3353 | 0.0025  | -0.0077 | - |
| 0.0053 | 1   | .   |                             |        |        |        |         |         |   |
| 2872   | CA  | CA  | . ASP ASP ASP A A 377 377 . | 0.3338 | 0.3564 | 0.3516 | -0.0152 | -0.0074 |   |
| 0.0079 | 1   | .   |                             |        |        |        |         |         |   |
| 2873   | CB  | CB  | . ASP ASP ASP A A 377 377 . | 0.3479 | 0.3498 | 0.3535 | -0.0234 | 0.0062  |   |
| 0.0034 | 1   | .   |                             |        |        |        |         |         |   |
| 2874   | CG  | CG  | . ASP ASP ASP A A 377 377 . | 0.3678 | 0.3858 | 0.4296 | -0.0540 | -0.0249 |   |
| 0.0293 | 1   | .   |                             |        |        |        |         |         |   |
| 2875   | OD1 | OD1 | . ASP ASP ASP A A 377 377 . | 0.4143 | 0.3856 | 0.4714 | -0.0414 | -0.0504 |   |
| 0.0354 | 1   | .   |                             |        |        |        |         |         |   |
| 2876   | OD2 | OD2 | . ASP ASP ASP A A 377 377 . | 0.1955 | 0.3661 | 0.4831 | -0.0783 | -0.0417 |   |
| 0.0616 | 1   | .   |                             |        |        |        |         |         |   |
| 2877   | C   | C   | . ASP ASP ASP A A 377 377 . | 0.3366 | 0.3481 | 0.3494 | -0.0052 | -0.0026 |   |
| 0.0108 | 1   | .   |                             |        |        |        |         |         |   |
| 2878   | O   | O   | . ASP ASP ASP A A 377 377 . | 0.3651 | 0.3525 | 0.3530 | -0.0113 | -0.0225 |   |
| 0.0106 | 1   | .   |                             |        |        |        |         |         |   |
| 2879   | N   | N   | . THR THR THR A A 378 378 . | 0.3268 | 0.3415 | 0.3353 | -0.0162 | 0.0011  |   |
| 0.0141 | 1   | .   |                             |        |        |        |         |         |   |
| 2880   | CA  | CA  | . THR THR THR A A 378 378 . | 0.3161 | 0.3396 | 0.3274 | -0.0146 | 0.0000  |   |
| 0.0086 | 1   | .   |                             |        |        |        |         |         |   |
| 2881   | CB  | CB  | . THR THR THR A A 378 378 . | 0.3174 | 0.3297 | 0.3298 | -0.0195 | 0.0026  |   |
| 0.0175 | 1   | .   |                             |        |        |        |         |         |   |
| 2882   | OG1 | OG1 | . THR THR THR A A 378 378 . | 0.3466 | 0.3671 | 0.3065 | -0.0401 | 0.0027  |   |
| 0.0158 | 1   | .   |                             |        |        |        |         |         |   |
| 2883   | CG2 | CG2 | . THR THR THR A A 378 378 . | 0.2766 | 0.3571 | 0.3188 | -0.0308 | 0.0266  |   |
| 0.0125 | 1   | .   |                             |        |        |        |         |         |   |
| 2884   | C   | C   | . THR THR THR A A 378 378 . | 0.3342 | 0.3422 | 0.3383 | 0.0019  | 0.0066  |   |
| 0.0022 | 1   | .   |                             |        |        |        |         |         |   |
| 2885   | O   | O   | . THR THR THR A A 378 378 . | 0.3514 | 0.3489 | 0.3645 | 0.0174  | 0.0154  | - |
| 0.0119 | 1   | .   |                             |        |        |        |         |         |   |
| 2886   | N   | N   | . PHE PHE PHE A A 379 379 . | 0.3334 | 0.3188 | 0.3252 | 0.0052  | 0.0138  | - |
| 0.0109 | 1   | .   |                             |        |        |        |         |         |   |
| 2887   | CA  | CA  | . PHE PHE PHE A A 379 379 . | 0.3284 | 0.3329 | 0.3398 | 0.0033  | 0.0066  | - |
| 0.0103 | 1   | .   |                             |        |        |        |         |         |   |
| 2888   | CB  | CB  | . PHE PHE PHE A A 379 379 . | 0.3505 | 0.3280 | 0.3470 | 0.0037  | 0.0024  | - |
| 0.0091 | 1   | .   |                             |        |        |        |         |         |   |
| 2889   | CG  | CG  | . PHE PHE PHE A A 379 379 . | 0.3705 | 0.3487 | 0.3716 | 0.0055  | 0.0179  | - |
| 0.0119 | 1   | .   |                             |        |        |        |         |         |   |
| 2890   | CD1 | CD1 | . PHE PHE PHE A A 379 379 . | 0.3927 | 0.3567 | 0.3931 | 0.0479  | 0.0116  | - |
| 0.0231 | 1   | .   |                             |        |        |        |         |         |   |
| 2891   | CE1 | CE1 | . PHE PHE PHE A A 379 379 . | 0.3581 | 0.3902 | 0.4634 | 0.0560  | 0.0276  |   |
| 0.0073 | 1   | .   |                             |        |        |        |         |         |   |
| 2892   | CZ  | CZ  | . PHE PHE PHE A A 379 379 . | 0.4130 | 0.4320 | 0.4766 | 0.0228  | -0.0018 |   |
| 0.0071 | 1   | .   |                             |        |        |        |         |         |   |

|        |     |     |                   |         |                                        |   |
|--------|-----|-----|-------------------|---------|----------------------------------------|---|
| 2893   | CE2 | CE2 | . PHE PHE PHE A A | 379 379 | . 0.3571 0.4375 0.4286 0.0141 0.0271   | - |
| 0.0006 | 1   | .   |                   |         |                                        |   |
| 2894   | CD2 | CD2 | . PHE PHE PHE A A | 379 379 | . 0.3741 0.3858 0.4329 0.0236 0.0412   | - |
| 0.0123 | 1   | .   |                   |         |                                        |   |
| 2895   | C   | C   | . PHE PHE PHE A A | 379 379 | . 0.3116 0.3425 0.3277 0.0025 0.0139   | - |
| 0.0047 | 1   | .   |                   |         |                                        |   |
| 2896   | O   | O   | . PHE PHE PHE A A | 379 379 | . 0.2377 0.3307 0.3262 0.0111 0.0440   | - |
| 0.0088 | 1   | .   |                   |         |                                        |   |
| 2897   | N   | N   | . ILE ILE ILE A A | 380 380 | . 0.2646 0.3350 0.3263 -0.0068 0.0136  | - |
| 0.0006 | 1   | .   |                   |         |                                        |   |
| 2898   | CA  | CA  | . ILE ILE ILE A A | 380 380 | . 0.2686 0.3377 0.3105 0.0014 0.0002   | - |
| 0.0024 | 1   | .   |                   |         |                                        |   |
| 2899   | CB  | CB  | . ILE ILE ILE A A | 380 380 | . 0.2671 0.3456 0.3222 -0.0059 0.0146  |   |
| 0.0031 | 1   | .   |                   |         |                                        |   |
| 2900   | CG1 | CG1 | . ILE ILE ILE A A | 380 380 | . 0.2150 0.3165 0.3007 -0.0029 -0.0047 |   |
| 0.0099 | 1   | .   |                   |         |                                        |   |
| 2901   | CD1 | CD1 | . ILE ILE ILE A A | 380 380 | . 0.2189 0.3025 0.2597 -0.0173 0.0509  | - |
| 0.0267 | 1   | .   |                   |         |                                        |   |
| 2902   | CG2 | CG2 | . ILE ILE ILE A A | 380 380 | . 0.2564 0.3707 0.3182 0.0192 -0.0263  | - |
| 0.0270 | 1   | .   |                   |         |                                        |   |
| 2903   | C   | C   | . ILE ILE ILE A A | 380 380 | . 0.2865 0.3495 0.3179 -0.0019 0.0044  |   |
| 0.0012 | 1   | .   |                   |         |                                        |   |
| 2904   | O   | O   | . ILE ILE ILE A A | 380 380 | . 0.3005 0.3630 0.3194 -0.0011 -0.0016 | - |
| 0.0252 | 1   | .   |                   |         |                                        |   |
| 2905   | N   | N   | . ALA ALA ALA A A | 381 381 | . 0.2993 0.3451 0.3207 -0.0025 0.0027  |   |
| 0.0063 | 1   | .   |                   |         |                                        |   |
| 2906   | CA  | CA  | . ALA ALA ALA A A | 381 381 | . 0.3266 0.3439 0.3160 -0.0071 0.0082  |   |
| 0.0009 | 1   | .   |                   |         |                                        |   |
| 2907   | CB  | CB  | . ALA ALA ALA A A | 381 381 | . 0.3249 0.3526 0.3275 -0.0095 -0.0028 |   |
| 0.0152 | 1   | .   |                   |         |                                        |   |
| 2908   | C   | C   | . ALA ALA ALA A A | 381 381 | . 0.3213 0.3483 0.3261 -0.0119 0.0167  |   |
| 0.0030 | 1   | .   |                   |         |                                        |   |
| 2909   | O   | O   | . ALA ALA ALA A A | 381 381 | . 0.3143 0.3713 0.3179 -0.0085 0.0357  |   |
| 0.0155 | 1   | .   |                   |         |                                        |   |
| 2910   | N   | N   | . ASP ASP ASP A A | 382 382 | . 0.3160 0.3260 0.3088 -0.0133 0.0102  | - |
| 0.0122 | 1   | .   |                   |         |                                        |   |
| 2911   | CA  | CA  | . ASP ASP ASP A A | 382 382 | . 0.3334 0.3450 0.3319 -0.0059 0.0178  | - |
| 0.0036 | 1   | .   |                   |         |                                        |   |
| 2912   | CB  | CB  | . ASP ASP ASP A A | 382 382 | . 0.3364 0.3516 0.3416 -0.0270 0.0154  | - |
| 0.0035 | 1   | .   |                   |         |                                        |   |
| 2913   | CG  | CG  | . ASP ASP ASP A A | 382 382 | . 0.3914 0.3484 0.4289 0.0034 0.0481   |   |
| 0.0093 | 1   | .   |                   |         |                                        |   |
| 2914   | OD1 | OD1 | . ASP ASP ASP A A | 382 382 | . 0.4129 0.3931 0.4787 -0.0042 0.1020  |   |
| 0.0305 | 1   | .   |                   |         |                                        |   |
| 2915   | OD2 | OD2 | . ASP ASP ASP A A | 382 382 | . 0.4184 0.3800 0.5244 -0.0373 0.1061  | - |
| 0.0475 | 1   | .   |                   |         |                                        |   |
| 2916   | C   | C   | . ASP ASP ASP A A | 382 382 | . 0.3298 0.3525 0.3318 -0.0024 0.0171  | - |
| 0.0035 | 1   | .   |                   |         |                                        |   |
| 2917   | O   | O   | . ASP ASP ASP A A | 382 382 | . 0.3131 0.3593 0.3274 0.0021 0.0280   |   |
| 0.0053 | 1   | .   |                   |         |                                        |   |
| 2918   | N   | N   | . LEU LEU LEU A A | 383 383 | . 0.3352 0.3560 0.3192 0.0043 0.0257   | - |
| 0.0022 | 1   | .   |                   |         |                                        |   |
| 2919   | CA  | CA  | . LEU LEU LEU A A | 383 383 | . 0.3348 0.3490 0.3124 0.0080 0.0133   |   |
| 0.0109 | 1   | .   |                   |         |                                        |   |
| 2920   | CB  | CB  | . LEU LEU LEU A A | 383 383 | . 0.3607 0.3504 0.3198 0.0101 0.0031   |   |
| 0.0221 | 1   | .   |                   |         |                                        |   |
| 2921   | CG  | CG  | . LEU LEU LEU A A | 383 383 | . 0.3496 0.3613 0.3106 0.0223 -0.0087  |   |
| 0.0444 | 1   | .   |                   |         |                                        |   |
| 2922   | CD1 | CD1 | . LEU LEU LEU A A | 383 383 | . 0.3715 0.3247 0.3049 0.0047 -0.0643  |   |
| 0.0684 | 1   | .   |                   |         |                                        |   |

|        |     |     |                             |        |        |        |         |         |   |
|--------|-----|-----|-----------------------------|--------|--------|--------|---------|---------|---|
| 2923   | CD2 | CD2 | . LEU LEU LEU A A 383 383 . | 0.3705 | 0.3841 | 0.2920 | 0.0230  | -0.0163 |   |
| 0.0886 | 1   | .   |                             |        |        |        |         |         |   |
| 2924   | C   | C   | . LEU LEU LEU A A 383 383 . | 0.3454 | 0.3500 | 0.3331 | 0.0007  | 0.0079  |   |
| 0.0061 | 1   | .   |                             |        |        |        |         |         |   |
| 2925   | O   | O   | . LEU LEU LEU A A 383 383 . | 0.3592 | 0.3606 | 0.3296 | 0.0031  | -0.0029 | - |
| 0.0025 | 1   | .   |                             |        |        |        |         |         |   |
| 2926   | N   | N   | . VAL VAL VAL A A 384 384 . | 0.3572 | 0.3483 | 0.3376 | 0.0082  | 0.0030  |   |
| 0.0092 | 1   | .   |                             |        |        |        |         |         |   |
| 2927   | CA  | CA  | . VAL VAL VAL A A 384 384 . | 0.3528 | 0.3497 | 0.3410 | 0.0099  | 0.0021  |   |
| 0.0107 | 1   | .   |                             |        |        |        |         |         |   |
| 2928   | CB  | CB  | . VAL VAL VAL A A 384 384 . | 0.3446 | 0.3525 | 0.3347 | 0.0057  | 0.0017  |   |
| 0.0077 | 1   | .   |                             |        |        |        |         |         |   |
| 2929   | CG1 | CG1 | . VAL VAL VAL A A 384 384 . | 0.3170 | 0.3243 | 0.3254 | 0.0116  | 0.0186  | - |
| 0.0021 | 1   | .   |                             |        |        |        |         |         |   |
| 2930   | CG2 | CG2 | . VAL VAL VAL A A 384 384 . | 0.3619 | 0.3587 | 0.3494 | 0.0241  | -0.0136 |   |
| 0.0113 | 1   | .   |                             |        |        |        |         |         |   |
| 2931   | C   | C   | . VAL VAL VAL A A 384 384 . | 0.3520 | 0.3599 | 0.3399 | 0.0118  | 0.0054  |   |
| 0.0091 | 1   | .   |                             |        |        |        |         |         |   |
| 2932   | O   | O   | . VAL VAL VAL A A 384 384 . | 0.3578 | 0.3648 | 0.3497 | 0.0106  | 0.0175  |   |
| 0.0097 | 1   | .   |                             |        |        |        |         |         |   |
| 2933   | N   | N   | . VAL VAL VAL A A 385 385 . | 0.3464 | 0.3704 | 0.3516 | 0.0082  | 0.0133  |   |
| 0.0056 | 1   | .   |                             |        |        |        |         |         |   |
| 2934   | CA  | CA  | . VAL VAL VAL A A 385 385 . | 0.3552 | 0.3623 | 0.3427 | 0.0128  | 0.0226  |   |
| 0.0049 | 1   | .   |                             |        |        |        |         |         |   |
| 2935   | CB  | CB  | . VAL VAL VAL A A 385 385 . | 0.3389 | 0.3686 | 0.3313 | 0.0047  | 0.0157  |   |
| 0.0058 | 1   | .   |                             |        |        |        |         |         |   |
| 2936   | CG1 | CG1 | . VAL VAL VAL A A 385 385 . | 0.3690 | 0.3794 | 0.3584 | 0.0053  | 0.0536  |   |
| 0.0293 | 1   | .   |                             |        |        |        |         |         |   |
| 2937   | CG2 | CG2 | . VAL VAL VAL A A 385 385 . | 0.3267 | 0.3738 | 0.3413 | 0.0129  | 0.0485  |   |
| 0.0044 | 1   | .   |                             |        |        |        |         |         |   |
| 2938   | C   | C   | . VAL VAL VAL A A 385 385 . | 0.3700 | 0.3638 | 0.3501 | 0.0211  | 0.0108  |   |
| 0.0070 | 1   | .   |                             |        |        |        |         |         |   |
| 2939   | O   | O   | . VAL VAL VAL A A 385 385 . | 0.3943 | 0.3712 | 0.3484 | 0.0269  | 0.0105  |   |
| 0.0172 | 1   | .   |                             |        |        |        |         |         |   |
| 2940   | N   | N   | . GLY GLY GLY A A 386 386 . | 0.3675 | 0.3746 | 0.3498 | 0.0112  | 0.0033  |   |
| 0.0120 | 1   | .   |                             |        |        |        |         |         |   |
| 2941   | CA  | CA  | . GLY GLY GLY A A 386 386 . | 0.3740 | 0.3799 | 0.3597 | 0.0079  | 0.0079  |   |
| 0.0135 | 1   | .   |                             |        |        |        |         |         |   |
| 2942   | C   | C   | . GLY GLY GLY A A 386 386 . | 0.3809 | 0.3915 | 0.3500 | -0.0068 | 0.0064  |   |
| 0.0109 | 1   | .   |                             |        |        |        |         |         |   |
| 2943   | O   | O   | . GLY GLY GLY A A 386 386 . | 0.3730 | 0.3983 | 0.3596 | -0.0329 | 0.0108  |   |
| 0.0191 | 1   | .   |                             |        |        |        |         |         |   |
| 2944   | N   | N   | . LEU LEU LEU A A 387 387 . | 0.3722 | 0.3796 | 0.3480 | -0.0110 | 0.0128  |   |
| 0.0087 | 1   | .   |                             |        |        |        |         |         |   |
| 2945   | CA  | CA  | . LEU LEU LEU A A 387 387 . | 0.3850 | 0.3883 | 0.3708 | 0.0009  | 0.0161  |   |
| 0.0076 | 1   | .   |                             |        |        |        |         |         |   |
| 2946   | CB  | CB  | . LEU LEU LEU A A 387 387 . | 0.4133 | 0.3927 | 0.3794 | 0.0065  | 0.0103  |   |
| 0.0099 | 1   | .   |                             |        |        |        |         |         |   |
| 2947   | CG  | CG  | . LEU LEU LEU A A 387 387 . | 0.4149 | 0.3922 | 0.3884 | 0.0088  | 0.0323  | - |
| 0.0089 | 1   | .   |                             |        |        |        |         |         |   |
| 2948   | CD1 | CD1 | . LEU LEU LEU A A 387 387 . | 0.3520 | 0.4117 | 0.4550 | 0.0324  | -0.0248 | - |
| 0.0287 | 1   | .   |                             |        |        |        |         |         |   |
| 2949   | CD2 | CD2 | . LEU LEU LEU A A 387 387 . | 0.4127 | 0.4096 | 0.4176 | -0.0187 | 0.0779  | - |
| 0.0245 | 1   | .   |                             |        |        |        |         |         |   |
| 2950   | C   | C   | . LEU LEU LEU A A 387 387 . | 0.4056 | 0.4152 | 0.3954 | -0.0027 | 0.0061  |   |
| 0.0157 | 1   | .   |                             |        |        |        |         |         |   |
| 2951   | O   | O   | . LEU LEU LEU A A 387 387 . | 0.4179 | 0.4322 | 0.3843 | -0.0007 | 0.0009  |   |
| 0.0247 | 1   | .   |                             |        |        |        |         |         |   |
| 2952   | N   | N   | . CYS CYS CYS A A 388 388 . | 0.4139 | 0.4148 | 0.4114 | 0.0025  | 0.0167  |   |
| 0.0089 | 1   | .   |                             |        |        |        |         |         |   |



|        |     |     |                             |        |        |        |         |         |   |
|--------|-----|-----|-----------------------------|--------|--------|--------|---------|---------|---|
| 2953   | CA  | CA  | . CYS CYS CYS A A 388 388 . | 0.4473 | 0.4303 | 0.4286 | 0.0106  | 0.0146  |   |
| 0.0027 | 1   | .   |                             |        |        |        |         |         |   |
| 2954   | CB  | CB  | . CYS CYS CYS A A 388 388 . | 0.4786 | 0.4405 | 0.4531 | 0.0111  | 0.0166  | - |
| 0.0022 | 1   | .   |                             |        |        |        |         |         |   |
| 2955   | SG  | SG  | . CYS CYS CYS A A 388 388 . | 0.6087 | 0.5673 | 0.5787 | 0.0890  | 0.0747  | - |
| 0.0387 | 1   | .   |                             |        |        |        |         |         |   |
| 2956   | C   | C   | . CYS CYS CYS A A 388 388 . | 0.4488 | 0.4258 | 0.4139 | 0.0068  | 0.0022  |   |
| 0.0025 | 1   | .   |                             |        |        |        |         |         |   |
| 2957   | O   | O   | . CYS CYS CYS A A 388 388 . | 0.4864 | 0.4143 | 0.4103 | 0.0105  | -0.0075 |   |
| 0.0078 | 1   | .   |                             |        |        |        |         |         |   |
| 2958   | N   | N   | . THR THR THR A A 389 389 . | 0.4220 | 0.4079 | 0.3896 | 0.0054  | 0.0062  |   |
| 0.0087 | 1   | .   |                             |        |        |        |         |         |   |
| 2959   | CA  | CA  | . THR THR THR A A 389 389 . | 0.4102 | 0.3993 | 0.3787 | -0.0095 | 0.0111  | - |
| 0.0020 | 1   | .   |                             |        |        |        |         |         |   |
| 2960   | CB  | CB  | . THR THR THR A A 389 389 . | 0.4155 | 0.3917 | 0.3924 | -0.0036 | 0.0107  | - |
| 0.0063 | 1   | .   |                             |        |        |        |         |         |   |
| 2961   | OG1 | OG1 | . THR THR THR A A 389 389 . | 0.4333 | 0.4176 | 0.3443 | -0.0046 | 0.0205  | - |
| 0.0446 | 1   | .   |                             |        |        |        |         |         |   |
| 2962   | CG2 | CG2 | . THR THR THR A A 389 389 . | 0.4200 | 0.3846 | 0.3670 | -0.0261 | 0.0219  | - |
| 0.0132 | 1   | .   |                             |        |        |        |         |         |   |
| 2963   | C   | C   | . THR THR THR A A 389 389 . | 0.4036 | 0.4054 | 0.3869 | -0.0020 | 0.0086  | - |
| 0.0062 | 1   | .   |                             |        |        |        |         |         |   |
| 2964   | O   | O   | . THR THR THR A A 389 389 . | 0.4009 | 0.4333 | 0.4015 | -0.0181 | 0.0166  | - |
| 0.0101 | 1   | .   |                             |        |        |        |         |         |   |
| 2965   | N   | N   | . GLY GLY GLY A A 390 390 . | 0.3844 | 0.3922 | 0.3867 | -0.0087 | 0.0172  | - |
| 0.0081 | 1   | .   |                             |        |        |        |         |         |   |
| 2966   | CA  | CA  | . GLY GLY GLY A A 390 390 . | 0.3743 | 0.3784 | 0.3664 | -0.0231 | 0.0262  | - |
| 0.0075 | 1   | .   |                             |        |        |        |         |         |   |
| 2967   | C   | C   | . GLY GLY GLY A A 390 390 . | 0.3486 | 0.3618 | 0.3584 | -0.0170 | 0.0185  | - |
| 0.0116 | 1   | .   |                             |        |        |        |         |         |   |
| 2968   | O   | O   | . GLY GLY GLY A A 390 390 . | 0.3360 | 0.3587 | 0.3217 | -0.0126 | 0.0250  | - |
| 0.0140 | 1   | .   |                             |        |        |        |         |         |   |
| 2969   | N   | N   | . GLN GLN GLN A A 391 391 . | 0.3322 | 0.3482 | 0.3404 | -0.0179 | 0.0109  | - |
| 0.0134 | 1   | .   |                             |        |        |        |         |         |   |
| 2970   | CA  | CA  | . GLN GLN GLN A A 391 391 . | 0.3190 | 0.3386 | 0.3317 | -0.0077 | 0.0006  | - |
| 0.0130 | 1   | .   |                             |        |        |        |         |         |   |
| 2971   | CB  | CB  | . GLN GLN GLN A A 391 391 . | 0.3261 | 0.3397 | 0.3328 | -0.0133 | 0.0046  | - |
| 0.0088 | 1   | .   |                             |        |        |        |         |         |   |
| 2972   | CG  | CG  | . GLN GLN GLN A A 391 391 . | 0.2937 | 0.3011 | 0.3460 | 0.0108  | -0.0178 | - |
| 0.0197 | 1   | .   |                             |        |        |        |         |         |   |
| 2973   | CD  | CD  | . GLN GLN GLN A A 391 391 . | 0.3007 | 0.3408 | 0.3727 | -0.0035 | -0.0066 | - |
| 0.0170 | 1   | .   |                             |        |        |        |         |         |   |
| 2974   | OE1 | OE1 | . GLN GLN GLN A A 391 391 . | 0.3007 | 0.3344 | 0.3907 | -0.0019 | 0.0036  | - |
| 0.0376 | 1   | .   |                             |        |        |        |         |         |   |
| 2975   | NE2 | NE2 | . GLN GLN GLN A A 391 391 . | 0.1717 | 0.3514 | 0.3804 | 0.0639  | -0.0435 | - |
| 0.0033 | 1   | .   |                             |        |        |        |         |         |   |
| 2976   | C   | C   | . GLN GLN GLN A A 391 391 . | 0.3095 | 0.3373 | 0.3265 | -0.0053 | -0.0050 | - |
| 0.0063 | 1   | .   |                             |        |        |        |         |         |   |
| 2977   | O   | O   | . GLN GLN GLN A A 391 391 . | 0.3292 | 0.3447 | 0.3301 | -0.0159 | -0.0193 | - |
| 0.0202 | 1   | .   |                             |        |        |        |         |         |   |
| 2978   | N   | N   | . ILE ILE ILE A A 392 392 . | 0.2992 | 0.3547 | 0.3257 | 0.0005  | -0.0101 | - |
| 0.0202 | 1   | .   |                             |        |        |        |         |         |   |
| 2979   | CA  | CA  | . ILE ILE ILE A A 392 392 . | 0.2714 | 0.3349 | 0.2999 | 0.0014  | -0.0170 | - |
| 0.0173 | 1   | .   |                             |        |        |        |         |         |   |
| 2980   | CB  | CB  | . ILE ILE ILE A A 392 392 . | 0.2832 | 0.3244 | 0.2848 | 0.0042  | -0.0160 | - |
| 0.0235 | 1   | .   |                             |        |        |        |         |         |   |
| 2981   | CG1 | CG1 | . ILE ILE ILE A A 392 392 . | 0.2512 | 0.3652 | 0.2938 | -0.0016 | -0.0193 | - |
| 0.0378 | 1   | .   |                             |        |        |        |         |         |   |
| 2982   | CD1 | CD1 | . ILE ILE ILE A A 392 392 . | 0.2368 | 0.2970 | 0.2460 | -0.0310 | 0.0438  | - |
| 0.1345 | 1   | .   |                             |        |        |        |         |         |   |



|        |     |     |                             |        |        |        |         |         |   |
|--------|-----|-----|-----------------------------|--------|--------|--------|---------|---------|---|
| 3013   | CB  | CB  | . PRO PRO PRO A A 397 397 . | 0.2835 | 0.2899 | 0.3025 | 0.0223  | -0.0166 | - |
| 0.0037 | 1   | .   |                             |        |        |        |         |         |   |
| 3014   | CG  | CG  | . PRO PRO PRO A A 397 397 . | 0.2885 | 0.2835 | 0.3143 | 0.0178  | 0.0059  |   |
| 0.0142 | 1   | .   |                             |        |        |        |         |         |   |
| 3015   | CD  | CD  | . PRO PRO PRO A A 397 397 . | 0.2632 | 0.2703 | 0.2949 | 0.0060  | -0.0006 | - |
| 0.0007 | 1   | .   |                             |        |        |        |         |         |   |
| 3016   | C   | C   | . PRO PRO PRO A A 397 397 . | 0.3052 | 0.3160 | 0.3190 | 0.0048  | -0.0007 |   |
| 0.0069 | 1   | .   |                             |        |        |        |         |         |   |
| 3017   | O   | O   | . PRO PRO PRO A A 397 397 . | 0.3070 | 0.3166 | 0.3072 | 0.0138  | -0.0031 |   |
| 0.0127 | 1   | .   |                             |        |        |        |         |         |   |
| 3018   | N   | N   | . CYS CYS CYS A A 398 398 . | 0.3044 | 0.3376 | 0.3276 | 0.0004  | 0.0174  |   |
| 0.0006 | 1   | .   |                             |        |        |        |         |         |   |
| 3019   | CA  | CA  | . CYS CYS CYS A A 398 398 . | 0.3115 | 0.3382 | 0.3320 | -0.0147 | 0.0162  |   |
| 0.0102 | 1   | .   |                             |        |        |        |         |         |   |
| 3020   | CB  | CB  | . CYS CYS CYS A A 398 398 . | 0.3097 | 0.3563 | 0.3470 | -0.0142 | 0.0224  |   |
| 0.0090 | 1   | .   |                             |        |        |        |         |         |   |
| 3021   | SG  | SG  | . CYS CYS CYS A A 398 398 . | 0.3404 | 0.4075 | 0.3704 | -0.0485 | 0.0452  |   |
| 0.0238 | 1   | .   |                             |        |        |        |         |         |   |
| 3022   | C   | C   | . CYS CYS CYS A A 398 398 . | 0.3031 | 0.3330 | 0.3158 | -0.0144 | 0.0047  |   |
| 0.0042 | 1   | .   |                             |        |        |        |         |         |   |
| 3023   | O   | O   | . CYS CYS CYS A A 398 398 . | 0.3343 | 0.3442 | 0.3273 | -0.0171 | -0.0003 |   |
| 0.0062 | 1   | .   |                             |        |        |        |         |         |   |
| 3024   | N   | N   | . ARG ARG ARG A A 399 399 . | 0.2775 | 0.3242 | 0.3044 | -0.0169 | 0.0127  |   |
| 0.0118 | 1   | .   |                             |        |        |        |         |         |   |
| 3025   | CA  | CA  | . ARG ARG ARG A A 399 399 . | 0.2608 | 0.2952 | 0.2804 | -0.0077 | 0.0065  |   |
| 0.0074 | 1   | .   |                             |        |        |        |         |         |   |
| 3026   | CB  | CB  | . ARG ARG ARG A A 399 399 . | 0.2482 | 0.2879 | 0.2839 | -0.0116 | 0.0123  |   |
| 0.0111 | 1   | .   |                             |        |        |        |         |         |   |
| 3027   | CG  | CG  | . ARG ARG ARG A A 399 399 . | 0.2594 | 0.2771 | 0.3004 | -0.0155 | 0.0142  |   |
| 0.0172 | 1   | .   |                             |        |        |        |         |         |   |
| 3028   | CD  | CD  | . ARG ARG ARG A A 399 399 . | 0.2278 | 0.2506 | 0.2976 | -0.0033 | 0.0059  |   |
| 0.0121 | 1   | .   |                             |        |        |        |         |         |   |
| 3029   | NE  | NE  | . ARG ARG ARG A A 399 399 . | 0.2326 | 0.2901 | 0.2627 | -0.0059 | 0.0367  | - |
| 0.0280 | 1   | .   |                             |        |        |        |         |         |   |
| 3030   | CZ  | CZ  | . ARG ARG ARG A A 399 399 . | 0.2684 | 0.2740 | 0.3022 | 0.0022  | 0.0136  | - |
| 0.0175 | 1   | .   |                             |        |        |        |         |         |   |
| 3031   | NH1 | NH1 | . ARG ARG ARG A A 399 399 . | 0.2643 | 0.2733 | 0.2727 | -0.0142 | 0.0254  | - |
| 0.0031 | 1   | .   |                             |        |        |        |         |         |   |
| 3032   | NH2 | NH2 | . ARG ARG ARG A A 399 399 . | 0.2863 | 0.2831 | 0.2605 | -0.0364 | 0.0147  | - |
| 0.0358 | 1   | .   |                             |        |        |        |         |         |   |
| 3033   | C   | C   | . ARG ARG ARG A A 399 399 . | 0.2694 | 0.2941 | 0.2858 | -0.0001 | 0.0075  |   |
| 0.0029 | 1   | .   |                             |        |        |        |         |         |   |
| 3034   | O   | O   | . ARG ARG ARG A A 399 399 . | 0.2617 | 0.3269 | 0.2842 | -0.0057 | 0.0033  | - |
| 0.0018 | 1   | .   |                             |        |        |        |         |         |   |
| 3035   | N   | N   | . SER SER SER A A 400 400 . | 0.2814 | 0.2905 | 0.2795 | -0.0123 | 0.0045  | - |
| 0.0057 | 1   | .   |                             |        |        |        |         |         |   |
| 3036   | CA  | CA  | . SER SER SER A A 400 400 . | 0.2856 | 0.3229 | 0.2942 | 0.0033  | 0.0102  |   |
| 0.0052 | 1   | .   |                             |        |        |        |         |         |   |
| 3037   | CB  | CB  | . SER SER SER A A 400 400 . | 0.3105 | 0.3229 | 0.2957 | 0.0039  | 0.0154  |   |
| 0.0070 | 1   | .   |                             |        |        |        |         |         |   |
| 3038   | OG  | OG  | . SER SER SER A A 400 400 . | 0.3306 | 0.2794 | 0.2850 | 0.0188  | 0.0341  |   |
| 0.0389 | 1   | .   |                             |        |        |        |         |         |   |
| 3039   | C   | C   | . SER SER SER A A 400 400 . | 0.2865 | 0.3346 | 0.3056 | -0.0047 | 0.0115  |   |
| 0.0066 | 1   | .   |                             |        |        |        |         |         |   |
| 3040   | O   | O   | . SER SER SER A A 400 400 . | 0.2797 | 0.3950 | 0.3072 | 0.0017  | 0.0152  |   |
| 0.0066 | 1   | .   |                             |        |        |        |         |         |   |
| 3041   | N   | N   | . GLU GLU GLU A A 401 401 . | 0.2810 | 0.3280 | 0.2876 | 0.0020  | 0.0130  |   |
| 0.0051 | 1   | .   |                             |        |        |        |         |         |   |
| 3042   | CA  | CA  | . GLU GLU GLU A A 401 401 . | 0.2617 | 0.3134 | 0.2861 | -0.0068 | 0.0038  | - |
| 0.0073 | 1   | .   |                             |        |        |        |         |         |   |



|        |     |     |                   |         |                                          |
|--------|-----|-----|-------------------|---------|------------------------------------------|
| 3073   | O   | O   | . ALA ALA ALA A A | 404 404 | . 0.1728 0.2781 0.2687 -0.0027 0.0306 -  |
| 0.0030 | 1   | .   |                   |         |                                          |
| 3074   | N   | N   | . LYS LYS LYS A A | 405 405 | . 0.2317 0.2795 0.2453 0.0039 -0.0162 -  |
| 0.0031 | 1   | .   |                   |         |                                          |
| 3075   | CA  | CA  | . LYS LYS LYS A A | 405 405 | . 0.2637 0.3045 0.2835 0.0018 -0.0018 -  |
| 0.0029 | 1   | .   |                   |         |                                          |
| 3076   | CB  | CB  | . LYS LYS LYS A A | 405 405 | . 0.2579 0.2952 0.2643 0.0186 -0.0083    |
| 0.0106 | 1   | .   |                   |         |                                          |
| 3077   | CG  | CG  | . LYS LYS LYS A A | 405 405 | . 0.3263 0.3080 0.2861 0.0118 -0.0016    |
| 0.0029 | 1   | .   |                   |         |                                          |
| 3078   | CD  | CD  | . LYS LYS LYS A A | 405 405 | . 0.3760 0.3446 0.2921 0.0335 0.0010     |
| 0.0012 | 1   | .   |                   |         |                                          |
| 3079   | CE  | CE  | . LYS LYS LYS A A | 405 405 | . 0.3045 0.3578 0.3120 0.0105 0.0281 -   |
| 0.0368 | 1   | .   |                   |         |                                          |
| 3080   | NZ  | NZ  | . LYS LYS LYS A A | 405 405 | . 0.3662 0.3924 0.2605 0.0443 0.0030 -   |
| 0.0353 | 1   | .   |                   |         |                                          |
| 3081   | C   | C   | . LYS LYS LYS A A | 405 405 | . 0.2581 0.3081 0.2823 0.0004 0.0106 -   |
| 0.0035 | 1   | .   |                   |         |                                          |
| 3082   | O   | O   | . LYS LYS LYS A A | 405 405 | . 0.2162 0.3466 0.2647 -0.0116 0.0171 -  |
| 0.0013 | 1   | .   |                   |         |                                          |
| 3083   | N   | N   | . TYR TYR TYR A A | 406 406 | . 0.2487 0.3049 0.2827 -0.0009 0.0053 -  |
| 0.0118 | 1   | .   |                   |         |                                          |
| 3084   | CA  | CA  | . TYR TYR TYR A A | 406 406 | . 0.2306 0.2966 0.2990 0.0023 0.0015 -   |
| 0.0051 | 1   | .   |                   |         |                                          |
| 3085   | CB  | CB  | . TYR TYR TYR A A | 406 406 | . 0.2230 0.2831 0.2912 -0.0100 -0.0064   |
| 0.0073 | 1   | .   |                   |         |                                          |
| 3086   | CG  | CG  | . TYR TYR TYR A A | 406 406 | . 0.1787 0.2377 0.2693 0.0082 -0.0194 -  |
| 0.0014 | 1   | .   |                   |         |                                          |
| 3087   | CD1 | CD1 | . TYR TYR TYR A A | 406 406 | . 0.1120 0.1545 0.2793 -0.0175 -0.0157   |
| 0.0319 | 1   | .   |                   |         |                                          |
| 3088   | CE1 | CE1 | . TYR TYR TYR A A | 406 406 | . 0.1924 0.1979 0.3201 0.0158 0.0000     |
| 0.0004 | 1   | .   |                   |         |                                          |
| 3089   | CZ  | CZ  | . TYR TYR TYR A A | 406 406 | . 0.1537 0.2278 0.2511 0.0008 -0.0196 -  |
| 0.0154 | 1   | .   |                   |         |                                          |
| 3090   | OH  | OH  | . TYR TYR TYR A A | 406 406 | . 0.2448 0.2891 0.2825 -0.0086 -0.0099 - |
| 0.0109 | 1   | .   |                   |         |                                          |
| 3091   | CE2 | CE2 | . TYR TYR TYR A A | 406 406 | . 0.1671 0.1678 0.2527 0.0206 -0.0224    |
| 0.0101 | 1   | .   |                   |         |                                          |
| 3092   | CD2 | CD2 | . TYR TYR TYR A A | 406 406 | . 0.1449 0.1963 0.2582 0.0015 -0.0419 -  |
| 0.0193 | 1   | .   |                   |         |                                          |
| 3093   | C   | C   | . TYR TYR TYR A A | 406 406 | . 0.2257 0.3149 0.2913 0.0073 0.0073 -   |
| 0.0052 | 1   | .   |                   |         |                                          |
| 3094   | O   | O   | . TYR TYR TYR A A | 406 406 | . 0.1852 0.3365 0.3295 0.0133 0.0133 -   |
| 0.0128 | 1   | .   |                   |         |                                          |
| 3095   | N   | N   | . ASN ASN ASN A A | 407 407 | . 0.2162 0.2928 0.2795 -0.0023 -0.0020 - |
| 0.0105 | 1   | .   |                   |         |                                          |
| 3096   | CA  | CA  | . ASN ASN ASN A A | 407 407 | . 0.2557 0.2908 0.2853 0.0159 0.0145     |
| 0.0014 | 1   | .   |                   |         |                                          |
| 3097   | CB  | CB  | . ASN ASN ASN A A | 407 407 | . 0.2417 0.2848 0.2715 0.0235 0.0239 -   |
| 0.0069 | 1   | .   |                   |         |                                          |
| 3098   | CG  | CG  | . ASN ASN ASN A A | 407 407 | . 0.2764 0.3058 0.2725 0.0174 0.0296 -   |
| 0.0094 | 1   | .   |                   |         |                                          |
| 3099   | OD1 | OD1 | . ASN ASN ASN A A | 407 407 | . 0.2018 0.3262 0.3511 0.0178 0.0681     |
| 0.0014 | 1   | .   |                   |         |                                          |
| 3100   | ND2 | ND2 | . ASN ASN ASN A A | 407 407 | . 0.2636 0.3056 0.2504 0.0347 0.0072 -   |
| 0.0469 | 1   | .   |                   |         |                                          |
| 3101   | C   | C   | . ASN ASN ASN A A | 407 407 | . 0.2565 0.2920 0.2803 0.0176 0.0141     |
| 0.0074 | 1   | .   |                   |         |                                          |
| 3102   | O   | O   | . ASN ASN ASN A A | 407 407 | . 0.3119 0.2792 0.2941 0.0332 0.0567 -   |
| 0.0066 | 1   | .   |                   |         |                                          |

|        |     |     |                             |        |        |        |         |         |   |
|--------|-----|-----|-----------------------------|--------|--------|--------|---------|---------|---|
| 3103   | N   | N   | . GLN GLN GLN A A 408 408 . | 0.2481 | 0.2806 | 0.2948 | 0.0116  | 0.0155  | - |
| 0.0186 | 1   | .   |                             |        |        |        |         |         |   |
| 3104   | CA  | CA  | . GLN GLN GLN A A 408 408 . | 0.2843 | 0.2967 | 0.2827 | 0.0038  | 0.0095  | - |
| 0.0061 | 1   | .   |                             |        |        |        |         |         |   |
| 3105   | CB  | CB  | . GLN GLN GLN A A 408 408 . | 0.2887 | 0.2819 | 0.2395 | 0.0113  | 0.0060  | - |
| 0.0192 | 1   | .   |                             |        |        |        |         |         |   |
| 3106   | CG  | CG  | . GLN GLN GLN A A 408 408 . | 0.2293 | 0.2719 | 0.2635 | -0.0385 | 0.0033  | - |
| 0.0373 | 1   | .   |                             |        |        |        |         |         |   |
| 3107   | CD  | CD  | . GLN GLN GLN A A 408 408 . | 0.3058 | 0.3226 | 0.3270 | -0.0303 | -0.0114 |   |
| 0.0356 | 1   | .   |                             |        |        |        |         |         |   |
| 3108   | OE1 | OE1 | . GLN GLN GLN A A 408 408 . | 0.3792 | 0.3782 | 0.3316 | 0.0026  | -0.0518 |   |
| 0.0557 | 1   | .   |                             |        |        |        |         |         |   |
| 3109   | NE2 | NE2 | . GLN GLN GLN A A 408 408 . | 0.1654 | 0.3387 | 0.3782 | -0.1090 | 0.0574  |   |
| 0.0310 | 1   | .   |                             |        |        |        |         |         |   |
| 3110   | C   | C   | . GLN GLN GLN A A 408 408 . | 0.2903 | 0.3111 | 0.2907 | -0.0006 | 0.0022  | - |
| 0.0143 | 1   | .   |                             |        |        |        |         |         |   |
| 3111   | O   | O   | . GLN GLN GLN A A 408 408 . | 0.2544 | 0.3395 | 0.3092 | 0.0026  | 0.0007  | - |
| 0.0156 | 1   | .   |                             |        |        |        |         |         |   |
| 3112   | N   | N   | . LEU LEU LEU A A 409 409 . | 0.2653 | 0.3152 | 0.3017 | -0.0095 | 0.0099  | - |
| 0.0049 | 1   | .   |                             |        |        |        |         |         |   |
| 3113   | CA  | CA  | . LEU LEU LEU A A 409 409 . | 0.2980 | 0.3326 | 0.3204 | -0.0110 | 0.0073  |   |
| 0.0067 | 1   | .   |                             |        |        |        |         |         |   |
| 3114   | CB  | CB  | . LEU LEU LEU A A 409 409 . | 0.2710 | 0.3281 | 0.2968 | 0.0038  | -0.0064 |   |
| 0.0104 | 1   | .   |                             |        |        |        |         |         |   |
| 3115   | CG  | CG  | . LEU LEU LEU A A 409 409 . | 0.2964 | 0.3149 | 0.3037 | -0.0115 | -0.0065 | - |
| 0.0092 | 1   | .   |                             |        |        |        |         |         |   |
| 3116   | CD1 | CD1 | . LEU LEU LEU A A 409 409 . | 0.2756 | 0.2999 | 0.3461 | 0.0617  | 0.0307  | - |
| 0.0231 | 1   | .   |                             |        |        |        |         |         |   |
| 3117   | CD2 | CD2 | . LEU LEU LEU A A 409 409 . | 0.1388 | 0.3008 | 0.2681 | 0.0062  | -0.0307 |   |
| 0.0106 | 1   | .   |                             |        |        |        |         |         |   |
| 3118   | C   | C   | . LEU LEU LEU A A 409 409 . | 0.3026 | 0.3424 | 0.3334 | 0.0001  | 0.0087  |   |
| 0.0099 | 1   | .   |                             |        |        |        |         |         |   |
| 3119   | O   | O   | . LEU LEU LEU A A 409 409 . | 0.3147 | 0.3530 | 0.3332 | 0.0038  | 0.0108  |   |
| 0.0088 | 1   | .   |                             |        |        |        |         |         |   |
| 3120   | N   | N   | . MET MET MET A A 410 410 . | 0.3021 | 0.3505 | 0.3621 | -0.0133 | 0.0016  |   |
| 0.0103 | 1   | .   |                             |        |        |        |         |         |   |
| 3121   | CA  | CA  | . MET MET MET A A 410 410 . | 0.3220 | 0.3452 | 0.3637 | -0.0120 | 0.0092  |   |
| 0.0003 | 1   | .   |                             |        |        |        |         |         |   |
| 3122   | CB  | CB  | . MET MET MET A A 410 410 . | 0.3472 | 0.3729 | 0.3645 | -0.0232 | 0.0023  | - |
| 0.0099 | 1   | .   |                             |        |        |        |         |         |   |
| 3123   | CG  | CG  | . MET MET MET A A 410 410 . | 0.3323 | 0.3711 | 0.4190 | -0.0053 | 0.0337  |   |
| 0.0187 | 1   | .   |                             |        |        |        |         |         |   |
| 3124   | SD  | SD  | . MET MET MET A A 410 410 . | 0.3856 | 0.3975 | 0.4581 | 0.0350  | 0.0376  |   |
| 0.0477 | 1   | .   |                             |        |        |        |         |         |   |
| 3125   | CE  | CE  | . MET MET MET A A 410 410 . | 0.3766 | 0.3167 | 0.3645 | -0.0077 | 0.0513  |   |
| 0.1067 | 1   | .   |                             |        |        |        |         |         |   |
| 3126   | C   | C   | . MET MET MET A A 410 410 . | 0.3227 | 0.3621 | 0.3658 | -0.0027 | 0.0120  | - |
| 0.0038 | 1   | .   |                             |        |        |        |         |         |   |
| 3127   | O   | O   | . MET MET MET A A 410 410 . | 0.3188 | 0.3722 | 0.3837 | -0.0132 | 0.0115  |   |
| 0.0180 | 1   | .   |                             |        |        |        |         |         |   |
| 3128   | N   | N   | . ARG ARG ARG A A 411 411 . | 0.3190 | 0.3769 | 0.3653 | 0.0010  | 0.0129  | - |
| 0.0012 | 1   | .   |                             |        |        |        |         |         |   |
| 3129   | CA  | CA  | . ARG ARG ARG A A 411 411 . | 0.3173 | 0.3744 | 0.3614 | -0.0010 | 0.0166  |   |
| 0.0067 | 1   | .   |                             |        |        |        |         |         |   |
| 3130   | CB  | CB  | . ARG ARG ARG A A 411 411 . | 0.2999 | 0.3775 | 0.3563 | 0.0020  | 0.0227  |   |
| 0.0063 | 1   | .   |                             |        |        |        |         |         |   |
| 3131   | CG  | CG  | . ARG ARG ARG A A 411 411 . | 0.2891 | 0.3457 | 0.3517 | -0.0046 | 0.0275  |   |
| 0.0384 | 1   | .   |                             |        |        |        |         |         |   |
| 3132   | CD  | CD  | . ARG ARG ARG A A 411 411 . | 0.2192 | 0.3405 | 0.3317 | 0.0227  | 0.0139  |   |
| 0.0418 | 1   | .   |                             |        |        |        |         |         |   |

|        |     |     |                             |        |        |        |         |         |   |
|--------|-----|-----|-----------------------------|--------|--------|--------|---------|---------|---|
| 3133   | NE  | NE  | . ARG ARG ARG A A 411 411 . | 0.3139 | 0.3991 | 0.4159 | 0.0483  | 0.0349  |   |
| 0.0270 | 1   | .   |                             |        |        |        |         |         |   |
| 3134   | CZ  | CZ  | . ARG ARG ARG A A 411 411 . | 0.3492 | 0.4159 | 0.4335 | 0.0706  | 0.0406  |   |
| 0.0091 | 1   | .   |                             |        |        |        |         |         |   |
| 3135   | NH1 | NH1 | . ARG ARG ARG A A 411 411 . | 0.3001 | 0.4458 | 0.4674 | 0.0774  | 0.0223  |   |
| 0.0211 | 1   | .   |                             |        |        |        |         |         |   |
| 3136   | NH2 | NH2 | . ARG ARG ARG A A 411 411 . | 0.3321 | 0.4319 | 0.4870 | 0.0602  | 0.0383  | - |
| 0.0089 | 1   | .   |                             |        |        |        |         |         |   |
| 3137   | C   | C   | . ARG ARG ARG A A 411 411 . | 0.3382 | 0.3897 | 0.3836 | 0.0078  | 0.0125  |   |
| 0.0078 | 1   | .   |                             |        |        |        |         |         |   |
| 3138   | O   | O   | . ARG ARG ARG A A 411 411 . | 0.2895 | 0.3756 | 0.3835 | 0.0198  | 0.0292  | - |
| 0.0035 | 1   | .   |                             |        |        |        |         |         |   |
| 3139   | N   | N   | . ILE ILE ILE A A 412 412 . | 0.3391 | 0.3905 | 0.3875 | 0.0203  | 0.0043  |   |
| 0.0095 | 1   | .   |                             |        |        |        |         |         |   |
| 3140   | CA  | CA  | . ILE ILE ILE A A 412 412 . | 0.3520 | 0.3976 | 0.3860 | 0.0073  | 0.0122  |   |
| 0.0085 | 1   | .   |                             |        |        |        |         |         |   |
| 3141   | CB  | CB  | . ILE ILE ILE A A 412 412 . | 0.3444 | 0.3863 | 0.3716 | 0.0100  | 0.0160  |   |
| 0.0081 | 1   | .   |                             |        |        |        |         |         |   |
| 3142   | CG1 | CG1 | . ILE ILE ILE A A 412 412 . | 0.3299 | 0.3666 | 0.3566 | 0.0200  | 0.0133  |   |
| 0.0151 | 1   | .   |                             |        |        |        |         |         |   |
| 3143   | CD1 | CD1 | . ILE ILE ILE A A 412 412 . | 0.3752 | 0.3741 | 0.3056 | 0.0741  | 0.0775  | - |
| 0.0068 | 1   | .   |                             |        |        |        |         |         |   |
| 3144   | CG2 | CG2 | . ILE ILE ILE A A 412 412 . | 0.3121 | 0.3955 | 0.3822 | -0.0087 | 0.0059  |   |
| 0.0264 | 1   | .   |                             |        |        |        |         |         |   |
| 3145   | C   | C   | . ILE ILE ILE A A 412 412 . | 0.3759 | 0.4132 | 0.4133 | 0.0048  | 0.0155  |   |
| 0.0002 | 1   | .   |                             |        |        |        |         |         |   |
| 3146   | O   | O   | . ILE ILE ILE A A 412 412 . | 0.3973 | 0.4372 | 0.4381 | -0.0026 | 0.0211  |   |
| 0.0019 | 1   | .   |                             |        |        |        |         |         |   |
| 3147   | N   | N   | . GLU GLU GLU A A 413 413 . | 0.3862 | 0.4246 | 0.4223 | 0.0093  | 0.0150  |   |
| 0.0057 | 1   | .   |                             |        |        |        |         |         |   |
| 3148   | CA  | CA  | . GLU GLU GLU A A 413 413 . | 0.3978 | 0.4367 | 0.4286 | 0.0075  | 0.0060  |   |
| 0.0016 | 1   | .   |                             |        |        |        |         |         |   |
| 3149   | CB  | CB  | . GLU GLU GLU A A 413 413 . | 0.4072 | 0.4343 | 0.4191 | 0.0085  | 0.0012  |   |
| 0.0113 | 1   | .   |                             |        |        |        |         |         |   |
| 3150   | CG  | CG  | . GLU GLU GLU A A 413 413 . | 0.3972 | 0.4299 | 0.3919 | 0.0195  | -0.0175 |   |
| 0.0120 | 1   | .   |                             |        |        |        |         |         |   |
| 3151   | CD  | CD  | . GLU GLU GLU A A 413 413 . | 0.4112 | 0.4480 | 0.3931 | 0.0013  | -0.0102 |   |
| 0.0269 | 1   | .   |                             |        |        |        |         |         |   |
| 3152   | OE1 | OE1 | . GLU GLU GLU A A 413 413 . | 0.4168 | 0.4049 | 0.3952 | -0.0014 | 0.0318  |   |
| 0.0175 | 1   | .   |                             |        |        |        |         |         |   |
| 3153   | OE2 | OE2 | . GLU GLU GLU A A 413 413 . | 0.3746 | 0.4891 | 0.3703 | -0.0080 | -0.0142 |   |
| 0.0004 | 1   | .   |                             |        |        |        |         |         |   |
| 3154   | C   | C   | . GLU GLU GLU A A 413 413 . | 0.4038 | 0.4543 | 0.4418 | 0.0085  | 0.0088  | - |
| 0.0016 | 1   | .   |                             |        |        |        |         |         |   |
| 3155   | O   | O   | . GLU GLU GLU A A 413 413 . | 0.3679 | 0.4793 | 0.4623 | 0.0012  | 0.0108  | - |
| 0.0055 | 1   | .   |                             |        |        |        |         |         |   |
| 3156   | N   | N   | . GLU GLU GLU A A 414 414 . | 0.4177 | 0.4653 | 0.4327 | 0.0096  | 0.0097  | - |
| 0.0088 | 1   | .   |                             |        |        |        |         |         |   |
| 3157   | CA  | CA  | . GLU GLU GLU A A 414 414 . | 0.4581 | 0.4893 | 0.4647 | 0.0145  | 0.0096  | - |
| 0.0066 | 1   | .   |                             |        |        |        |         |         |   |
| 3158   | CB  | CB  | . GLU GLU GLU A A 414 414 . | 0.4608 | 0.4972 | 0.4577 | 0.0202  | 0.0078  | - |
| 0.0143 | 1   | .   |                             |        |        |        |         |         |   |
| 3159   | CG  | CG  | . GLU GLU GLU A A 414 414 . | 0.5068 | 0.5522 | 0.4829 | 0.0295  | -0.0012 | - |
| 0.0065 | 1   | .   |                             |        |        |        |         |         |   |
| 3160   | CD  | CD  | . GLU GLU GLU A A 414 414 . | 0.5277 | 0.5940 | 0.5038 | 0.0291  | 0.0143  |   |
| 0.0136 | 1   | .   |                             |        |        |        |         |         |   |
| 3161   | OE1 | OE1 | . GLU GLU GLU A A 414 414 . | 0.4687 | 0.5973 | 0.4891 | 0.0850  | 0.0773  | - |
| 0.0028 | 1   | .   |                             |        |        |        |         |         |   |
| 3162   | OE2 | OE2 | . GLU GLU GLU A A 414 414 . | 0.5939 | 0.7097 | 0.4796 | 0.0243  | -0.0116 |   |
| 0.0181 | 1   | .   |                             |        |        |        |         |         |   |

|        |     |     |                             |        |        |        |         |         |   |
|--------|-----|-----|-----------------------------|--------|--------|--------|---------|---------|---|
| 3163   | C   | C   | . GLU GLU GLU A A 414 414 . | 0.4678 | 0.5067 | 0.4785 | 0.0143  | 0.0105  | - |
| 0.0089 | 1   | .   |                             |        |        |        |         |         |   |
| 3164   | O   | O   | . GLU GLU GLU A A 414 414 . | 0.4613 | 0.5242 | 0.4949 | 0.0255  | 0.0203  | - |
| 0.0111 | 1   | .   |                             |        |        |        |         |         |   |
| 3165   | N   | N   | . GLU GLU GLU A A 415 415 . | 0.4876 | 0.5064 | 0.4797 | 0.0091  | 0.0109  | - |
| 0.0022 | 1   | .   |                             |        |        |        |         |         |   |
| 3166   | CA  | CA  | . GLU GLU GLU A A 415 415 . | 0.4975 | 0.5266 | 0.4976 | -0.0022 | 0.0086  |   |
| 0.0017 | 1   | .   |                             |        |        |        |         |         |   |
| 3167   | CB  | CB  | . GLU GLU GLU A A 415 415 . | 0.5038 | 0.5450 | 0.5054 | 0.0106  | 0.0123  |   |
| 0.0005 | 1   | .   |                             |        |        |        |         |         |   |
| 3168   | CG  | CG  | . GLU GLU GLU A A 415 415 . | 0.5645 | 0.6162 | 0.5499 | -0.0188 | 0.0083  |   |
| 0.0237 | 1   | .   |                             |        |        |        |         |         |   |
| 3169   | CD  | CD  | . GLU GLU GLU A A 415 415 . | 0.6538 | 0.7516 | 0.6319 | -0.0048 | -0.0222 |   |
| 0.0397 | 1   | .   |                             |        |        |        |         |         |   |
| 3170   | OE1 | OE1 | . GLU GLU GLU A A 415 415 . | 0.7041 | 0.7895 | 0.6483 | -0.0150 | -0.0210 |   |
| 0.0519 | 1   | .   |                             |        |        |        |         |         |   |
| 3171   | OE2 | OE2 | . GLU GLU GLU A A 415 415 . | 0.7266 | 0.8239 | 0.6609 | -0.0067 | 0.0049  |   |
| 0.0588 | 1   | .   |                             |        |        |        |         |         |   |
| 3172   | C   | C   | . GLU GLU GLU A A 415 415 . | 0.4996 | 0.5242 | 0.5041 | -0.0009 | 0.0100  | - |
| 0.0047 | 1   | .   |                             |        |        |        |         |         |   |
| 3173   | O   | O   | . GLU GLU GLU A A 415 415 . | 0.5022 | 0.5361 | 0.5106 | -0.0087 | 0.0211  | - |
| 0.0055 | 1   | .   |                             |        |        |        |         |         |   |
| 3174   | N   | N   | . LEU LEU LEU A A 416 416 . | 0.4929 | 0.5124 | 0.4907 | -0.0052 | 0.0045  | - |
| 0.0019 | 1   | .   |                             |        |        |        |         |         |   |
| 3175   | CA  | CA  | . LEU LEU LEU A A 416 416 . | 0.4998 | 0.5240 | 0.4977 | 0.0014  | 0.0100  |   |
| 0.0015 | 1   | .   |                             |        |        |        |         |         |   |
| 3176   | CB  | CB  | . LEU LEU LEU A A 416 416 . | 0.4899 | 0.5006 | 0.4680 | 0.0035  | 0.0168  | - |
| 0.0035 | 1   | .   |                             |        |        |        |         |         |   |
| 3177   | CG  | CG  | . LEU LEU LEU A A 416 416 . | 0.4559 | 0.4867 | 0.4206 | -0.0004 | 0.0291  |   |
| 0.0207 | 1   | .   |                             |        |        |        |         |         |   |
| 3178   | CD1 | CD1 | . LEU LEU LEU A A 416 416 . | 0.4153 | 0.4788 | 0.3090 | 0.0042  | 0.0744  |   |
| 0.0264 | 1   | .   |                             |        |        |        |         |         |   |
| 3179   | CD2 | CD2 | . LEU LEU LEU A A 416 416 . | 0.4431 | 0.4316 | 0.4075 | -0.0145 | 0.0961  | - |
| 0.0630 | 1   | .   |                             |        |        |        |         |         |   |
| 3180   | C   | C   | . LEU LEU LEU A A 416 416 . | 0.5213 | 0.5423 | 0.5166 | 0.0014  | 0.0056  | - |
| 0.0022 | 1   | .   |                             |        |        |        |         |         |   |
| 3181   | O   | O   | . LEU LEU LEU A A 416 416 . | 0.5138 | 0.5655 | 0.5014 | 0.0028  | 0.0076  | - |
| 0.0001 | 1   | .   |                             |        |        |        |         |         |   |
| 3182   | N   | N   | . GLY GLY GLY A A 417 417 . | 0.5475 | 0.5630 | 0.5395 | 0.0018  | -0.0007 | - |
| 0.0027 | 1   | .   |                             |        |        |        |         |         |   |
| 3183   | CA  | CA  | . GLY GLY GLY A A 417 417 . | 0.5659 | 0.5883 | 0.5634 | 0.0059  | 0.0002  | - |
| 0.0074 | 1   | .   |                             |        |        |        |         |         |   |
| 3184   | C   | C   | . GLY GLY GLY A A 417 417 . | 0.5896 | 0.6165 | 0.5751 | 0.0039  | -0.0005 | - |
| 0.0091 | 1   | .   |                             |        |        |        |         |         |   |
| 3185   | O   | O   | . GLY GLY GLY A A 417 417 . | 0.5941 | 0.6311 | 0.5573 | 0.0027  | -0.0005 | - |
| 0.0065 | 1   | .   |                             |        |        |        |         |         |   |
| 3186   | N   | N   | . ASP ASP ASP A A 418 418 . | 0.6036 | 0.6285 | 0.6018 | 0.0051  | 0.0031  | - |
| 0.0091 | 1   | .   |                             |        |        |        |         |         |   |
| 3187   | CA  | CA  | . ASP ASP ASP A A 418 418 . | 0.6234 | 0.6328 | 0.6198 | 0.0102  | -0.0005 | - |
| 0.0082 | 1   | .   |                             |        |        |        |         |         |   |
| 3188   | CB  | CB  | . ASP ASP ASP A A 418 418 . | 0.6572 | 0.6528 | 0.6496 | 0.0145  | -0.0033 | - |
| 0.0118 | 1   | .   |                             |        |        |        |         |         |   |
| 3189   | CG  | CG  | . ASP ASP ASP A A 418 418 . | 0.7168 | 0.7036 | 0.7289 | 0.0272  | -0.0334 | - |
| 0.0206 | 1   | .   |                             |        |        |        |         |         |   |
| 3190   | OD1 | OD1 | . ASP ASP ASP A A 418 418 . | 0.7292 | 0.7986 | 0.8103 | 0.0467  | -0.0681 | - |
| 0.0031 | 1   | .   |                             |        |        |        |         |         |   |
| 3191   | OD2 | OD2 | . ASP ASP ASP A A 418 418 . | 0.7688 | 0.7535 | 0.8244 | 0.0890  | -0.0561 | - |
| 0.0090 | 1   | .   |                             |        |        |        |         |         |   |
| 3192   | C   | C   | . ASP ASP ASP A A 418 418 . | 0.6150 | 0.6214 | 0.6074 | 0.0031  | 0.0079  | - |
| 0.0048 | 1   | .   |                             |        |        |        |         |         |   |



|        |     |     |                             |        |        |        |         |         |   |
|--------|-----|-----|-----------------------------|--------|--------|--------|---------|---------|---|
| 3193   | O   | O   | . ASP ASP ASP A A 418 418 . | 0.6196 | 0.6164 | 0.6055 | 0.0005  | 0.0106  | - |
| 0.0068 | 1   | .   |                             |        |        |        |         |         |   |
| 3194   | N   | N   | . GLU GLU GLU A A 419 419 . | 0.5917 | 0.6077 | 0.5888 | -0.0015 | 0.0104  | - |
| 0.0021 | 1   | .   |                             |        |        |        |         |         |   |
| 3195   | CA  | CA  | . GLU GLU GLU A A 419 419 . | 0.5792 | 0.5953 | 0.5736 | -0.0050 | 0.0092  |   |
| 0.0032 | 1   | .   |                             |        |        |        |         |         |   |
| 3196   | CB  | CB  | . GLU GLU GLU A A 419 419 . | 0.6054 | 0.6137 | 0.5876 | -0.0055 | 0.0006  |   |
| 0.0025 | 1   | .   |                             |        |        |        |         |         |   |
| 3197   | CG  | CG  | . GLU GLU GLU A A 419 419 . | 0.6567 | 0.6926 | 0.6844 | -0.0044 | -0.0006 |   |
| 0.0105 | 1   | .   |                             |        |        |        |         |         |   |
| 3198   | CD  | CD  | . GLU GLU GLU A A 419 419 . | 0.7658 | 0.7509 | 0.7813 | -0.0067 | -0.0175 | - |
| 0.0138 | 1   | .   |                             |        |        |        |         |         |   |
| 3199   | OE1 | OE1 | . GLU GLU GLU A A 419 419 . | 0.7802 | 0.7899 | 0.7964 | 0.0140  | -0.0344 |   |
| 0.0092 | 1   | .   |                             |        |        |        |         |         |   |
| 3200   | OE2 | OE2 | . GLU GLU GLU A A 419 419 . | 0.8382 | 0.7785 | 0.8527 | 0.0153  | 0.0269  |   |
| 0.0091 | 1   | .   |                             |        |        |        |         |         |   |
| 3201   | C   | C   | . GLU GLU GLU A A 419 419 . | 0.5561 | 0.5676 | 0.5449 | 0.0002  | 0.0076  |   |
| 0.0035 | 1   | .   |                             |        |        |        |         |         |   |
| 3202   | O   | O   | . GLU GLU GLU A A 419 419 . | 0.5347 | 0.5661 | 0.5224 | -0.0024 | 0.0125  |   |
| 0.0103 | 1   | .   |                             |        |        |        |         |         |   |
| 3203   | N   | N   | . ALA ALA ALA A A 420 420 . | 0.5177 | 0.5354 | 0.5228 | -0.0060 | 0.0140  |   |
| 0.0006 | 1   | .   |                             |        |        |        |         |         |   |
| 3204   | CA  | CA  | . ALA ALA ALA A A 420 420 . | 0.5146 | 0.5009 | 0.4964 | 0.0004  | 0.0117  | - |
| 0.0047 | 1   | .   |                             |        |        |        |         |         |   |
| 3205   | CB  | CB  | . ALA ALA ALA A A 420 420 . | 0.5073 | 0.4857 | 0.4882 | 0.0057  | 0.0197  | - |
| 0.0092 | 1   | .   |                             |        |        |        |         |         |   |
| 3206   | C   | C   | . ALA ALA ALA A A 420 420 . | 0.4951 | 0.4888 | 0.4846 | -0.0067 | 0.0134  | - |
| 0.0043 | 1   | .   |                             |        |        |        |         |         |   |
| 3207   | O   | O   | . ALA ALA ALA A A 420 420 . | 0.5233 | 0.5133 | 0.4958 | -0.0138 | 0.0110  |   |
| 0.0002 | 1   | .   |                             |        |        |        |         |         |   |
| 3208   | N   | N   | . ARG ARG ARG A A 421 421 . | 0.4768 | 0.4675 | 0.4584 | -0.0017 | 0.0117  | - |
| 0.0031 | 1   | .   |                             |        |        |        |         |         |   |
| 3209   | CA  | CA  | . ARG ARG ARG A A 421 421 . | 0.4726 | 0.4800 | 0.4488 | -0.0060 | 0.0122  | - |
| 0.0041 | 1   | .   |                             |        |        |        |         |         |   |
| 3210   | CB  | CB  | . ARG ARG ARG A A 421 421 . | 0.4841 | 0.4913 | 0.4707 | -0.0094 | 0.0108  | - |
| 0.0023 | 1   | .   |                             |        |        |        |         |         |   |
| 3211   | CG  | CG  | . ARG ARG ARG A A 421 421 . | 0.5371 | 0.5729 | 0.5178 | 0.0045  | 0.0215  | - |
| 0.0015 | 1   | .   |                             |        |        |        |         |         |   |
| 3212   | CD  | CD  | . ARG ARG ARG A A 421 421 . | 0.6243 | 0.6284 | 0.5970 | 0.0281  | 0.0127  | - |
| 0.0342 | 1   | .   |                             |        |        |        |         |         |   |
| 3213   | NE  | NE  | . ARG ARG ARG A A 421 421 . | 0.6780 | 0.7252 | 0.6012 | 0.0243  | 0.0403  | - |
| 0.0203 | 1   | .   |                             |        |        |        |         |         |   |
| 3214   | CZ  | CZ  | . ARG ARG ARG A A 421 421 . | 0.6911 | 0.7647 | 0.6583 | 0.0268  | 0.0312  | - |
| 0.0214 | 1   | .   |                             |        |        |        |         |         |   |
| 3215   | NH1 | NH1 | . ARG ARG ARG A A 421 421 . | 0.7303 | 0.7692 | 0.7009 | 0.0210  | 0.0229  | - |
| 0.0042 | 1   | .   |                             |        |        |        |         |         |   |
| 3216   | NH2 | NH2 | . ARG ARG ARG A A 421 421 . | 0.6916 | 0.7877 | 0.6282 | 0.0208  | 0.0588  | - |
| 0.0443 | 1   | .   |                             |        |        |        |         |         |   |
| 3217   | C   | C   | . ARG ARG ARG A A 421 421 . | 0.4654 | 0.4562 | 0.4208 | -0.0149 | 0.0099  | - |
| 0.0028 | 1   | .   |                             |        |        |        |         |         |   |
| 3218   | O   | O   | . ARG ARG ARG A A 421 421 . | 0.4874 | 0.4783 | 0.4316 | -0.0115 | 0.0258  |   |
| 0.0124 | 1   | .   |                             |        |        |        |         |         |   |
| 3219   | N   | N   | . PHE PHE PHE A A 422 422 . | 0.4258 | 0.4336 | 0.3991 | -0.0140 | 0.0142  | - |
| 0.0057 | 1   | .   |                             |        |        |        |         |         |   |
| 3220   | CA  | CA  | . PHE PHE PHE A A 422 422 . | 0.3954 | 0.4072 | 0.3772 | 0.0058  | 0.0134  | - |
| 0.0234 | 1   | .   |                             |        |        |        |         |         |   |
| 3221   | CB  | CB  | . PHE PHE PHE A A 422 422 . | 0.3774 | 0.3833 | 0.3738 | 0.0131  | 0.0253  | - |
| 0.0229 | 1   | .   |                             |        |        |        |         |         |   |
| 3222   | CG  | CG  | . PHE PHE PHE A A 422 422 . | 0.3774 | 0.3757 | 0.3706 | -0.0012 | 0.0241  | - |
| 0.0255 | 1   | .   |                             |        |        |        |         |         |   |



|        |     |     |                             |        |        |        |         |         |   |
|--------|-----|-----|-----------------------------|--------|--------|--------|---------|---------|---|
| 3253   | OD1 | OD1 | . ASN ASN ASN A A 426 426 . | 0.5338 | 0.4633 | 0.3698 | -0.0150 | -0.0588 | - |
| 0.0432 | 1   | .   |                             |        |        |        |         |         |   |
| 3254   | ND2 | ND2 | . ASN ASN ASN A A 426 426 . | 0.4773 | 0.3950 | 0.3801 | 0.0579  | -0.0634 |   |
| 0.0127 | 1   | .   |                             |        |        |        |         |         |   |
| 3255   | C   | C   | . ASN ASN ASN A A 426 426 . | 0.4050 | 0.4108 | 0.3969 | -0.0029 | -0.0059 |   |
| 0.0016 | 1   | .   |                             |        |        |        |         |         |   |
| 3256   | O   | O   | . ASN ASN ASN A A 426 426 . | 0.4465 | 0.4179 | 0.4105 | -0.0016 | -0.0165 | - |
| 0.0029 | 1   | .   |                             |        |        |        |         |         |   |
| 3257   | N   | N   | . PHE PHE PHE A A 427 427 . | 0.4070 | 0.4335 | 0.4100 | 0.0080  | -0.0064 | - |
| 0.0096 | 1   | .   |                             |        |        |        |         |         |   |
| 3258   | CA  | CA  | . PHE PHE PHE A A 427 427 . | 0.4184 | 0.4357 | 0.4290 | 0.0006  | -0.0067 | - |
| 0.0136 | 1   | .   |                             |        |        |        |         |         |   |
| 3259   | CB  | CB  | . PHE PHE PHE A A 427 427 . | 0.4200 | 0.4245 | 0.3905 | 0.0052  | -0.0141 | - |
| 0.0159 | 1   | .   |                             |        |        |        |         |         |   |
| 3260   | CG  | CG  | . PHE PHE PHE A A 427 427 . | 0.4053 | 0.4352 | 0.4063 | 0.0098  | 0.0029  | - |
| 0.0176 | 1   | .   |                             |        |        |        |         |         |   |
| 3261   | CD1 | CD1 | . PHE PHE PHE A A 427 427 . | 0.3899 | 0.4049 | 0.3886 | 0.0040  | -0.0182 | - |
| 0.0024 | 1   | .   |                             |        |        |        |         |         |   |
| 3262   | CE1 | CE1 | . PHE PHE PHE A A 427 427 . | 0.4143 | 0.3977 | 0.4284 | -0.0054 | 0.0042  |   |
| 0.0150 | 1   | .   |                             |        |        |        |         |         |   |
| 3263   | CZ  | CZ  | . PHE PHE PHE A A 427 427 . | 0.4028 | 0.4282 | 0.4566 | 0.0047  | -0.0081 | - |
| 0.0159 | 1   | .   |                             |        |        |        |         |         |   |
| 3264   | CE2 | CE2 | . PHE PHE PHE A A 427 427 . | 0.3935 | 0.4178 | 0.4285 | 0.0116  | -0.0014 | - |
| 0.0306 | 1   | .   |                             |        |        |        |         |         |   |
| 3265   | CD2 | CD2 | . PHE PHE PHE A A 427 427 . | 0.4247 | 0.4496 | 0.4161 | 0.0154  | -0.0297 | - |
| 0.0330 | 1   | .   |                             |        |        |        |         |         |   |
| 3266   | C   | C   | . PHE PHE PHE A A 427 427 . | 0.4556 | 0.4453 | 0.4560 | -0.0032 | 0.0001  | - |
| 0.0136 | 1   | .   |                             |        |        |        |         |         |   |
| 3267   | O   | O   | . PHE PHE PHE A A 427 427 . | 0.4621 | 0.4704 | 0.4755 | -0.0011 | 0.0113  | - |
| 0.0149 | 1   | .   |                             |        |        |        |         |         |   |
| 3268   | N   | N   | . ARG ARG ARG A A 428 428 . | 0.4775 | 0.4621 | 0.4645 | 0.0039  | -0.0029 | - |
| 0.0055 | 1   | .   |                             |        |        |        |         |         |   |
| 3269   | CA  | CA  | . ARG ARG ARG A A 428 428 . | 0.5042 | 0.4808 | 0.4906 | 0.0033  | 0.0005  | - |
| 0.0087 | 1   | .   |                             |        |        |        |         |         |   |
| 3270   | CB  | CB  | . ARG ARG ARG A A 428 428 . | 0.4941 | 0.4726 | 0.4857 | -0.0009 | 0.0005  | - |
| 0.0159 | 1   | .   |                             |        |        |        |         |         |   |
| 3271   | CG  | CG  | . ARG ARG ARG A A 428 428 . | 0.5137 | 0.4500 | 0.4805 | 0.0127  | 0.0030  | - |
| 0.0258 | 1   | .   |                             |        |        |        |         |         |   |
| 3272   | CD  | CD  | . ARG ARG ARG A A 428 428 . | 0.5494 | 0.4669 | 0.4813 | 0.0351  | -0.0445 | - |
| 0.0174 | 1   | .   |                             |        |        |        |         |         |   |
| 3273   | NE  | NE  | . ARG ARG ARG A A 428 428 . | 0.5749 | 0.4612 | 0.5205 | 0.0455  | -0.0266 | - |
| 0.0273 | 1   | .   |                             |        |        |        |         |         |   |
| 3274   | CZ  | CZ  | . ARG ARG ARG A A 428 428 . | 0.5393 | 0.5049 | 0.5696 | 0.0402  | -0.0022 |   |
| 0.0003 | 1   | .   |                             |        |        |        |         |         |   |
| 3275   | NH1 | NH1 | . ARG ARG ARG A A 428 428 . | 0.5704 | 0.4937 | 0.6098 | 0.0614  | 0.0200  |   |
| 0.0582 | 1   | .   |                             |        |        |        |         |         |   |
| 3276   | NH2 | NH2 | . ARG ARG ARG A A 428 428 . | 0.5679 | 0.5522 | 0.5471 | 0.0420  | 0.0106  |   |
| 0.0139 | 1   | .   |                             |        |        |        |         |         |   |
| 3277   | C   | C   | . ARG ARG ARG A A 428 428 . | 0.5214 | 0.5043 | 0.5112 | 0.0011  | -0.0018 | - |
| 0.0049 | 1   | .   |                             |        |        |        |         |         |   |
| 3278   | O   | O   | . ARG ARG ARG A A 428 428 . | 0.5394 | 0.5029 | 0.5363 | 0.0026  | -0.0144 | - |
| 0.0051 | 1   | .   |                             |        |        |        |         |         |   |
| 3279   | N   | N   | . ASN ASN ASN A A 429 429 . | 0.5315 | 0.5191 | 0.5080 | 0.0090  | 0.0004  | - |
| 0.0068 | 1   | .   |                             |        |        |        |         |         |   |
| 3280   | CA  | CA  | . ASN ASN ASN A A 429 429 . | 0.5341 | 0.5342 | 0.5332 | -0.0039 | 0.0068  | - |
| 0.0055 | 1   | .   |                             |        |        |        |         |         |   |
| 3281   | CB  | CB  | . ASN ASN ASN A A 429 429 . | 0.5477 | 0.5505 | 0.5249 | -0.0011 | 0.0112  | - |
| 0.0062 | 1   | .   |                             |        |        |        |         |         |   |
| 3282   | CG  | CG  | . ASN ASN ASN A A 429 429 . | 0.5916 | 0.5812 | 0.5579 | 0.0148  | 0.0323  | - |
| 0.0136 | 1   | .   |                             |        |        |        |         |         |   |



|        |     |     |                             |        |        |        |         |         |   |
|--------|-----|-----|-----------------------------|--------|--------|--------|---------|---------|---|
| 3313   | C   | C   | . LEU LEU LEU A A 433 433 . | 0.6239 | 0.6020 | 0.6113 | -0.0250 | 0.0175  | - |
| 0.0090 | 1   | .   |                             |        |        |        |         |         |   |
| 3314   | O   | O   | . LEU LEU LEU A A 433 433 . | 0.6312 | 0.6134 | 0.6088 | -0.0365 | 0.0227  | - |
| 0.0111 | 1   | .   |                             |        |        |        |         |         |   |
| 3315   | G+2 | G+2 | . MG2 MG2 MG2 A . 601 601 . | 0.0580 | 0.1607 | 0.2070 | 0.0464  | 0.0250  | - |
| 0.0064 | 1   | .   |                             |        |        |        |         |         |   |
| 3316   | G+2 | G+2 | . MG2 MG2 MG2 A . 602 602 . | 0.1428 | 0.1863 | 0.1711 | -0.0481 | -0.0831 | - |
| 0.0174 | 1   | .   |                             |        |        |        |         |         |   |
| 3317   | O4P | O4P | . 2PG 2PG 2PG A . 603 603 . | 0.2655 | 0.4248 | 0.3520 | -0.0129 | -0.0225 | - |
| 0.0608 | 1   | .   |                             |        |        |        |         |         |   |
| 3318   | P   | P   | . 2PG 2PG 2PG A . 603 603 . | 0.2974 | 0.3903 | 0.3824 | 0.0002  | 0.0123  |   |
| 0.0257 | 1   | .   |                             |        |        |        |         |         |   |
| 3319   | O2P | O2P | . 2PG 2PG 2PG A . 603 603 . | 0.2773 | 0.4011 | 0.3739 | 0.0705  | 0.0291  |   |
| 0.0127 | 1   | .   |                             |        |        |        |         |         |   |
| 3320   | O3P | O3P | . 2PG 2PG 2PG A . 603 603 . | 0.2382 | 0.4436 | 0.3787 | 0.0140  | -0.0299 |   |
| 0.0194 | 1   | .   |                             |        |        |        |         |         |   |
| 3321   | O1P | O1P | . 2PG 2PG 2PG A . 603 603 . | 0.3311 | 0.4246 | 0.3904 | -0.0496 | -0.0032 | - |
| 0.0117 | 1   | .   |                             |        |        |        |         |         |   |
| 3322   | C2  | C2  | . 2PG 2PG 2PG A . 603 603 . | 0.4344 | 0.4547 | 0.4069 | -0.0132 | -0.0013 | - |
| 0.0167 | 1   | .   |                             |        |        |        |         |         |   |
| 3323   | C1  | C1  | . 2PG 2PG 2PG A . 603 603 . | 0.4003 | 0.4565 | 0.4074 | -0.0235 | 0.0067  | - |
| 0.0408 | 1   | .   |                             |        |        |        |         |         |   |
| 3324   | O2  | O2  | . 2PG 2PG 2PG A . 603 603 . | 0.3627 | 0.5377 | 0.4399 | -0.0185 | 0.0105  | - |
| 0.0484 | 1   | .   |                             |        |        |        |         |         |   |
| 3325   | O1  | O1  | . 2PG 2PG 2PG A . 603 603 . | 0.4031 | 0.4367 | 0.4029 | -0.0032 | -0.0061 | - |
| 0.0295 | 1   | .   |                             |        |        |        |         |         |   |
| 3326   | C3  | C3  | . 2PG 2PG 2PG A . 603 603 . | 0.4614 | 0.4657 | 0.4158 | 0.0086  | -0.0110 | - |
| 0.0182 | 1   | .   |                             |        |        |        |         |         |   |
| 3327   | O3  | O3  | . 2PG 2PG 2PG A . 603 603 . | 0.6114 | 0.5209 | 0.4388 | -0.0267 | -0.0444 |   |
| 0.0632 | 1   | .   |                             |        |        |        |         |         |   |
| 3328   | O   | O   | . HOH HOH HOH A . 604 604 . | 0.1859 | 0.4411 | 0.3479 | 0.0420  | 0.0390  | - |
| 0.0710 | 1   | .   |                             |        |        |        |         |         |   |
| 3329   | O   | O   | . HOH HOH HOH A . 605 605 . | 0.2705 | 0.5031 | 0.2805 | -0.0139 | -0.1250 |   |
| 0.0251 | 1   | .   |                             |        |        |        |         |         |   |
| 3330   | O   | O   | . HOH HOH HOH A . 606 606 . | 0.2397 | 0.3674 | 0.3369 | -0.0688 | -0.0967 |   |
| 0.0391 | 1   | .   |                             |        |        |        |         |         |   |
| 3331   | N   | N   | . SER SER SER B B 1 1 .     | 0.5638 | 0.6008 | 0.6138 | -0.0089 | -0.0181 | - |
| 0.0031 | 1   | .   |                             |        |        |        |         |         |   |
| 3332   | CA  | CA  | . SER SER SER B B 1 1 .     | 0.5774 | 0.6153 | 0.6170 | 0.0019  | -0.0142 |   |
| 0.0031 | 1   | .   |                             |        |        |        |         |         |   |
| 3333   | CB  | CB  | . SER SER SER B B 1 1 .     | 0.5759 | 0.6252 | 0.6176 | 0.0033  | -0.0131 |   |
| 0.0051 | 1   | .   |                             |        |        |        |         |         |   |
| 3334   | OG  | OG  | . SER SER SER B B 1 1 .     | 0.5873 | 0.6676 | 0.6247 | -0.0063 | -0.0131 |   |
| 0.0163 | 1   | .   |                             |        |        |        |         |         |   |
| 3335   | C   | C   | . SER SER SER B B 1 1 .     | 0.5664 | 0.6013 | 0.6199 | 0.0041  | -0.0120 |   |
| 0.0036 | 1   | .   |                             |        |        |        |         |         |   |
| 3336   | O   | O   | . SER SER SER B B 1 1 .     | 0.5682 | 0.6159 | 0.6357 | 0.0119  | -0.0060 |   |
| 0.0035 | 1   | .   |                             |        |        |        |         |         |   |
| 3337   | N   | N   | . ILE ILE ILE B B 2 2 .     | 0.5500 | 0.5793 | 0.6076 | 0.0065  | -0.0108 |   |
| 0.0075 | 1   | .   |                             |        |        |        |         |         |   |
| 3338   | CA  | CA  | . ILE ILE ILE B B 2 2 .     | 0.5590 | 0.5669 | 0.5879 | 0.0018  | -0.0043 |   |
| 0.0035 | 1   | .   |                             |        |        |        |         |         |   |
| 3339   | CB  | CB  | . ILE ILE ILE B B 2 2 .     | 0.5549 | 0.5521 | 0.5816 | -0.0015 | -0.0043 |   |
| 0.0032 | 1   | .   |                             |        |        |        |         |         |   |
| 3340   | CG1 | CG1 | . ILE ILE ILE B B 2 2 .     | 0.5443 | 0.5566 | 0.5763 | -0.0044 | -0.0060 |   |
| 0.0159 | 1   | .   |                             |        |        |        |         |         |   |
| 3341   | CD1 | CD1 | . ILE ILE ILE B B 2 2 .     | 0.5131 | 0.5224 | 0.5816 | -0.0091 | -0.0155 | - |
| 0.0066 | 1   | .   |                             |        |        |        |         |         |   |
| 3342   | CG2 | CG2 | . ILE ILE ILE B B 2 2 .     | 0.5460 | 0.5465 | 0.5838 | 0.0025  | -0.0097 |   |
| 0.0067 | 1   | .   |                             |        |        |        |         |         |   |

|        |     |     |                     |   |                                        |
|--------|-----|-----|---------------------|---|----------------------------------------|
| 3343   | C   | C   | . ILE ILE ILE B B 2 | 2 | . 0.5438 0.5568 0.5816 0.0027 0.0048   |
| 0.0046 | 1   | .   |                     |   |                                        |
| 3344   | O   | O   | . ILE ILE ILE B B 2 | 2 | . 0.5336 0.5513 0.5965 0.0040 0.0000   |
| 0.0092 | 1   | .   |                     |   |                                        |
| 3345   | N   | N   | . GLN GLN GLN B B 3 | 3 | . 0.5394 0.5571 0.5694 0.0036 0.0090   |
| 0.0059 | 1   | .   |                     |   |                                        |
| 3346   | CA  | CA  | . GLN GLN GLN B B 3 | 3 | . 0.5395 0.5574 0.5613 0.0049 0.0082   |
| 0.0079 | 1   | .   |                     |   |                                        |
| 3347   | CB  | CB  | . GLN GLN GLN B B 3 | 3 | . 0.5543 0.5721 0.5733 0.0083 0.0143   |
| 0.0113 | 1   | .   |                     |   |                                        |
| 3348   | CG  | CG  | . GLN GLN GLN B B 3 | 3 | . 0.6142 0.6129 0.6422 -0.0029 0.0218  |
| 0.0003 | 1   | .   |                     |   | -                                      |
| 3349   | CD  | CD  | . GLN GLN GLN B B 3 | 3 | . 0.6846 0.6566 0.7396 0.0426 0.0513   |
| 0.0258 | 1   | .   |                     |   |                                        |
| 3350   | OE1 | OE1 | . GLN GLN GLN B B 3 | 3 | . 0.7140 0.6614 0.7882 0.0916 0.0784   |
| 0.0188 | 1   | .   |                     |   | -                                      |
| 3351   | NE2 | NE2 | . GLN GLN GLN B B 3 | 3 | . 0.6810 0.7014 0.7981 0.0260 0.0689   |
| 0.0292 | 1   | .   |                     |   |                                        |
| 3352   | C   | C   | . GLN GLN GLN B B 3 | 3 | . 0.5293 0.5482 0.5411 0.0129 0.0090   |
| 0.0113 | 1   | .   |                     |   |                                        |
| 3353   | O   | O   | . GLN GLN GLN B B 3 | 3 | . 0.5031 0.5473 0.5180 0.0229 0.0205   |
| 0.0152 | 1   | .   |                     |   |                                        |
| 3354   | N   | N   | . LYS LYS LYS B B 4 | 4 | . 0.5257 0.5380 0.5299 0.0093 0.0111   |
| 0.0096 | 1   | .   |                     |   |                                        |
| 3355   | CA  | CA  | . LYS LYS LYS B B 4 | 4 | . 0.5094 0.5242 0.5257 0.0033 0.0098   |
| 0.0075 | 1   | .   |                     |   |                                        |
| 3356   | CB  | CB  | . LYS LYS LYS B B 4 | 4 | . 0.5115 0.5298 0.5338 0.0139 0.0146   |
| 0.0062 | 1   | .   |                     |   |                                        |
| 3357   | CG  | CG  | . LYS LYS LYS B B 4 | 4 | . 0.5266 0.5510 0.5817 -0.0080 0.0143  |
| 0.0074 | 1   | .   |                     |   | -                                      |
| 3358   | CD  | CD  | . LYS LYS LYS B B 4 | 4 | . 0.6457 0.6798 0.6406 -0.0100 -0.0074 |
| 0.0108 | 1   | .   |                     |   |                                        |
| 3359   | CE  | CE  | . LYS LYS LYS B B 4 | 4 | . 0.7353 0.7424 0.7095 -0.0320 0.0064  |
| 0.0232 | 1   | .   |                     |   | -                                      |
| 3360   | NZ  | NZ  | . LYS LYS LYS B B 4 | 4 | . 0.7661 0.7678 0.7731 -0.0758 0.0002  |
| 0.0154 | 1   | .   |                     |   |                                        |
| 3361   | C   | C   | . LYS LYS LYS B B 4 | 4 | . 0.5199 0.5098 0.5090 0.0035 0.0067   |
| 0.0096 | 1   | .   |                     |   |                                        |
| 3362   | O   | O   | . LYS LYS LYS B B 4 | 4 | . 0.5028 0.4921 0.5067 0.0049 0.0080   |
| 0.0208 | 1   | .   |                     |   |                                        |
| 3363   | N   | N   | . ILE ILE ILE B B 5 | 5 | . 0.5097 0.5113 0.5044 0.0016 0.0054   |
| 0.0001 | 1   | .   |                     |   | -                                      |
| 3364   | CA  | CA  | . ILE ILE ILE B B 5 | 5 | . 0.4880 0.5013 0.5031 0.0033 0.0018   |
| 0.0030 | 1   | .   |                     |   | -                                      |
| 3365   | CB  | CB  | . ILE ILE ILE B B 5 | 5 | . 0.4845 0.4962 0.5050 0.0061 0.0047   |
| 0.0125 | 1   | .   |                     |   | -                                      |
| 3366   | CG1 | CG1 | . ILE ILE ILE B B 5 | 5 | . 0.4853 0.4999 0.4749 0.0248 0.0107   |
| 0.0050 | 1   | .   |                     |   |                                        |
| 3367   | CD1 | CD1 | . ILE ILE ILE B B 5 | 5 | . 0.5586 0.5240 0.4710 0.0411 -0.0084  |
| 0.0236 | 1   | .   |                     |   | -                                      |
| 3368   | CG2 | CG2 | . ILE ILE ILE B B 5 | 5 | . 0.5057 0.4964 0.5079 0.0009 0.0248   |
| 0.0071 | 1   | .   |                     |   | -                                      |
| 3369   | C   | C   | . ILE ILE ILE B B 5 | 5 | . 0.4895 0.5100 0.5115 0.0077 0.0062   |
| 0.0087 | 1   | .   |                     |   | -                                      |
| 3370   | O   | O   | . ILE ILE ILE B B 5 | 5 | . 0.4679 0.5359 0.5163 0.0109 0.0084   |
| 0.0147 | 1   | .   |                     |   | -                                      |
| 3371   | N   | N   | . TRP TRP TRP B B 6 | 6 | . 0.4649 0.5035 0.5083 0.0087 0.0017   |
| 0.0010 | 1   | .   |                     |   | -                                      |
| 3372   | CA  | CA  | . TRP TRP TRP B B 6 | 6 | . 0.4854 0.5112 0.5047 0.0058 0.0111   |
| 0.0063 | 1   | .   |                     |   | -                                      |

|        |     |     |                       |                                         |
|--------|-----|-----|-----------------------|-----------------------------------------|
| 3373   | CB  | CB  | . TRP TRP TRP B B 6 6 | . 0.5151 0.5412 0.5292 0.0134 0.0139 -  |
| 0.0057 | 1 . |     |                       |                                         |
| 3374   | CG  | CG  | . TRP TRP TRP B B 6 6 | . 0.6559 0.6873 0.6334 0.0217 -0.0246 - |
| 0.0384 | 1 . |     |                       |                                         |
| 3375   | CD1 | CD1 | . TRP TRP TRP B B 6 6 | . 0.6977 0.7757 0.7219 0.0547 -0.0462 - |
| 0.0498 | 1 . |     |                       |                                         |
| 3376   | NE1 | NE1 | . TRP TRP TRP B B 6 6 | . 0.7888 0.8526 0.7668 0.0686 -0.0518 - |
| 0.0755 | 1 . |     |                       |                                         |
| 3377   | CE2 | CE2 | . TRP TRP TRP B B 6 6 | . 0.8020 0.8470 0.7899 0.0671 -0.0460 - |
| 0.0683 | 1 . |     |                       |                                         |
| 3378   | CD2 | CD2 | . TRP TRP TRP B B 6 6 | . 0.7870 0.7865 0.7405 0.0579 -0.0208 - |
| 0.0697 | 1 . |     |                       |                                         |
| 3379   | CE3 | CE3 | . TRP TRP TRP B B 6 6 | . 0.8249 0.8143 0.7651 0.0644 -0.0408 - |
| 0.0431 | 1 . |     |                       |                                         |
| 3380   | CZ3 | CZ3 | . TRP TRP TRP B B 6 6 | . 0.8872 0.8432 0.8197 0.0701 -0.0350 - |
| 0.0542 | 1 . |     |                       |                                         |
| 3381   | CH2 | CH2 | . TRP TRP TRP B B 6 6 | . 0.8945 0.8620 0.8402 0.0747 -0.0467 - |
| 0.0677 | 1 . |     |                       |                                         |
| 3382   | CZ2 | CZ2 | . TRP TRP TRP B B 6 6 | . 0.8519 0.8747 0.8271 0.0587 -0.0540 - |
| 0.0842 | 1 . |     |                       |                                         |
| 3383   | C   | C   | . TRP TRP TRP B B 6 6 | . 0.4462 0.4669 0.4689 0.0079 0.0141 -  |
| 0.0004 | 1 . |     |                       |                                         |
| 3384   | O   | O   | . TRP TRP TRP B B 6 6 | . 0.4233 0.4725 0.4564 0.0060 0.0270    |
| 0.0049 | 1 . |     |                       |                                         |
| 3385   | N   | N   | . ALA ALA ALA B B 7 7 | . 0.4040 0.4373 0.4264 0.0154 0.0224    |
| 0.0209 | 1 . |     |                       |                                         |
| 3386   | CA  | CA  | . ALA ALA ALA B B 7 7 | . 0.3860 0.4231 0.4137 0.0223 0.0195    |
| 0.0069 | 1 . |     |                       |                                         |
| 3387   | CB  | CB  | . ALA ALA ALA B B 7 7 | . 0.3606 0.3939 0.4078 0.0241 0.0346    |
| 0.0124 | 1 . |     |                       |                                         |
| 3388   | C   | C   | . ALA ALA ALA B B 7 7 | . 0.3802 0.4136 0.3953 0.0175 0.0191    |
| 0.0026 | 1 . |     |                       |                                         |
| 3389   | O   | O   | . ALA ALA ALA B B 7 7 | . 0.3826 0.4267 0.4123 0.0247 0.0289 -  |
| 0.0088 | 1 . |     |                       |                                         |
| 3390   | N   | N   | . ARG ARG ARG B B 8 8 | . 0.3414 0.3785 0.3859 0.0143 0.0158    |
| 0.0118 | 1 . |     |                       |                                         |
| 3391   | CA  | CA  | . ARG ARG ARG B B 8 8 | . 0.3338 0.3625 0.3645 0.0071 0.0158    |
| 0.0032 | 1 . |     |                       |                                         |
| 3392   | CB  | CB  | . ARG ARG ARG B B 8 8 | . 0.3461 0.3744 0.3726 0.0015 0.0186    |
| 0.0018 | 1 . |     |                       |                                         |
| 3393   | CG  | CG  | . ARG ARG ARG B B 8 8 | . 0.2665 0.3517 0.3907 0.0154 -0.0084   |
| 0.0179 | 1 . |     |                       |                                         |
| 3394   | CD  | CD  | . ARG ARG ARG B B 8 8 | . 0.3144 0.3943 0.4036 -0.0237 0.0021   |
| 0.0440 | 1 . |     |                       |                                         |
| 3395   | NE  | NE  | . ARG ARG ARG B B 8 8 | . 0.3920 0.3709 0.3712 -0.0099 0.0097   |
| 0.0497 | 1 . |     |                       |                                         |
| 3396   | CZ  | CZ  | . ARG ARG ARG B B 8 8 | . 0.3868 0.3969 0.4218 -0.0092 0.0114   |
| 0.0523 | 1 . |     |                       |                                         |
| 3397   | NH1 | NH1 | . ARG ARG ARG B B 8 8 | . 0.3855 0.3957 0.4422 0.0067 0.0445    |
| 0.0592 | 1 . |     |                       |                                         |
| 3398   | NH2 | NH2 | . ARG ARG ARG B B 8 8 | . 0.4837 0.4595 0.3927 -0.0248 0.0736   |
| 0.0386 | 1 . |     |                       |                                         |
| 3399   | C   | C   | . ARG ARG ARG B B 8 8 | . 0.3424 0.3700 0.3651 0.0012 0.0155    |
| 0.0059 | 1 . |     |                       |                                         |
| 3400   | O   | O   | . ARG ARG ARG B B 8 8 | . 0.3263 0.3744 0.3662 0.0203 0.0323    |
| 0.0114 | 1 . |     |                       |                                         |
| 3401   | N   | N   | . GLU GLU GLU B B 9 9 | . 0.3313 0.3845 0.3504 0.0013 0.0162 -  |
| 0.0052 | 1 . |     |                       |                                         |
| 3402   | CA  | CA  | . GLU GLU GLU B B 9 9 | . 0.3631 0.3905 0.3634 -0.0056 0.0148   |
| 0.0080 | 1 . |     |                       |                                         |





|        |     |     |                           |        |        |        |         |         |   |
|--------|-----|-----|---------------------------|--------|--------|--------|---------|---------|---|
| 3433   | O   | O   | . ASP ASP ASP B B 12 12 . | 0.2539 | 0.2663 | 0.2815 | -0.0269 | -0.0256 | - |
| 0.0280 | 1   | .   |                           |        |        |        |         |         |   |
| 3434   | N   | N   | . SER SER SER B B 13 13 . | 0.2322 | 0.2949 | 0.2780 | -0.0046 | 0.0014  | - |
| 0.0112 | 1   | .   |                           |        |        |        |         |         |   |
| 3435   | CA  | CA  | . SER SER SER B B 13 13 . | 0.2816 | 0.2927 | 0.2857 | -0.0052 | 0.0041  | - |
| 0.0031 | 1   | .   |                           |        |        |        |         |         |   |
| 3436   | CB  | CB  | . SER SER SER B B 13 13 . | 0.2783 | 0.2852 | 0.2860 | 0.0028  | 0.0143  | - |
| 0.0040 | 1   | .   |                           |        |        |        |         |         |   |
| 3437   | OG  | OG  | . SER SER SER B B 13 13 . | 0.2910 | 0.2811 | 0.3044 | 0.0169  | 0.0183  | - |
| 0.0111 | 1   | .   |                           |        |        |        |         |         |   |
| 3438   | C   | C   | . SER SER SER B B 13 13 . | 0.2842 | 0.3093 | 0.2937 | -0.0054 | -0.0032 | - |
| 0.0041 | 1   | .   |                           |        |        |        |         |         |   |
| 3439   | O   | O   | . SER SER SER B B 13 13 . | 0.3026 | 0.3294 | 0.3183 | -0.0161 | 0.0153  | - |
| 0.0135 | 1   | .   |                           |        |        |        |         |         |   |
| 3440   | N   | N   | . ARG ARG ARG B B 14 14 . | 0.3038 | 0.3218 | 0.3160 | -0.0152 | 0.0023  | - |
| 0.0144 | 1   | .   |                           |        |        |        |         |         |   |
| 3441   | CA  | CA  | . ARG ARG ARG B B 14 14 . | 0.3196 | 0.3425 | 0.3310 | -0.0163 | 0.0091  | - |
| 0.0040 | 1   | .   |                           |        |        |        |         |         |   |
| 3442   | CB  | CB  | . ARG ARG ARG B B 14 14 . | 0.3227 | 0.3255 | 0.3408 | -0.0174 | 0.0073  | - |
| 0.0081 | 1   | .   |                           |        |        |        |         |         |   |
| 3443   | CG  | CG  | . ARG ARG ARG B B 14 14 . | 0.3701 | 0.3238 | 0.3456 | -0.0417 | 0.0002  | - |
| 0.0073 | 1   | .   |                           |        |        |        |         |         |   |
| 3444   | CD  | CD  | . ARG ARG ARG B B 14 14 . | 0.4289 | 0.3404 | 0.3952 | 0.0073  | -0.0577 | - |
| 0.0238 | 1   | .   |                           |        |        |        |         |         |   |
| 3445   | NE  | NE  | . ARG ARG ARG B B 14 14 . | 0.4127 | 0.3059 | 0.3927 | 0.0366  | -0.0083 | - |
| 0.0382 | 1   | .   |                           |        |        |        |         |         |   |
| 3446   | CZ  | CZ  | . ARG ARG ARG B B 14 14 . | 0.3576 | 0.3056 | 0.3949 | 0.0063  | -0.0061 | - |
| 0.0212 | 1   | .   |                           |        |        |        |         |         |   |
| 3447   | NH1 | NH1 | . ARG ARG ARG B B 14 14 . | 0.3289 | 0.2790 | 0.3702 | -0.0718 | 0.0445  | - |
| 0.0440 | 1   | .   |                           |        |        |        |         |         |   |
| 3448   | NH2 | NH2 | . ARG ARG ARG B B 14 14 . | 0.2530 | 0.2171 | 0.4019 | -0.0521 | -0.0161 | - |
| 0.0710 | 1   | .   |                           |        |        |        |         |         |   |
| 3449   | C   | C   | . ARG ARG ARG B B 14 14 . | 0.3101 | 0.3505 | 0.3330 | -0.0156 | 0.0115  | - |
| 0.0057 | 1   | .   |                           |        |        |        |         |         |   |
| 3450   | O   | O   | . ARG ARG ARG B B 14 14 . | 0.2822 | 0.3436 | 0.3445 | -0.0124 | 0.0170  | - |
| 0.0056 | 1   | .   |                           |        |        |        |         |         |   |
| 3451   | N   | N   | . GLY GLY GLY B B 15 15 . | 0.2977 | 0.3707 | 0.3309 | -0.0100 | 0.0099  | - |
| 0.0036 | 1   | .   |                           |        |        |        |         |         |   |
| 3452   | CA  | CA  | . GLY GLY GLY B B 15 15 . | 0.2866 | 0.3358 | 0.3174 | -0.0002 | 0.0117  | - |
| 0.0071 | 1   | .   |                           |        |        |        |         |         |   |
| 3453   | C   | C   | . GLY GLY GLY B B 15 15 . | 0.3167 | 0.3431 | 0.3208 | -0.0004 | 0.0017  | - |
| 0.0068 | 1   | .   |                           |        |        |        |         |         |   |
| 3454   | O   | O   | . GLY GLY GLY B B 15 15 . | 0.3003 | 0.3298 | 0.3041 | 0.0095  | -0.0089 | - |
| 0.0088 | 1   | .   |                           |        |        |        |         |         |   |
| 3455   | N   | N   | . ASN ASN ASN B B 16 16 . | 0.3158 | 0.3338 | 0.3061 | 0.0063  | -0.0024 | - |
| 0.0019 | 1   | .   |                           |        |        |        |         |         |   |
| 3456   | CA  | CA  | . ASN ASN ASN B B 16 16 . | 0.3175 | 0.3267 | 0.3125 | 0.0026  | 0.0103  | - |
| 0.0023 | 1   | .   |                           |        |        |        |         |         |   |
| 3457   | CB  | CB  | . ASN ASN ASN B B 16 16 . | 0.3378 | 0.3247 | 0.3025 | -0.0021 | 0.0166  | - |
| 0.0081 | 1   | .   |                           |        |        |        |         |         |   |
| 3458   | CG  | CG  | . ASN ASN ASN B B 16 16 . | 0.3458 | 0.3235 | 0.3069 | -0.0171 | 0.0051  | - |
| 0.0214 | 1   | .   |                           |        |        |        |         |         |   |
| 3459   | OD1 | OD1 | . ASN ASN ASN B B 16 16 . | 0.3387 | 0.4165 | 0.2750 | -0.0400 | -0.0102 | - |
| 0.0218 | 1   | .   |                           |        |        |        |         |         |   |
| 3460   | ND2 | ND2 | . ASN ASN ASN B B 16 16 . | 0.3788 | 0.2653 | 0.2854 | -0.0170 | 0.0127  | - |
| 0.0173 | 1   | .   |                           |        |        |        |         |         |   |
| 3461   | C   | C   | . ASN ASN ASN B B 16 16 . | 0.3088 | 0.3164 | 0.3035 | 0.0007  | 0.0188  | - |
| 0.0063 | 1   | .   |                           |        |        |        |         |         |   |
| 3462   | O   | O   | . ASN ASN ASN B B 16 16 . | 0.2834 | 0.3214 | 0.2825 | 0.0142  | 0.0353  | - |
| 0.0053 | 1   | .   |                           |        |        |        |         |         |   |

|        |     |     |                           |        |        |        |         |         |   |
|--------|-----|-----|---------------------------|--------|--------|--------|---------|---------|---|
| 3463   | N   | N   | . PRO PRO PRO B B 17 17 . | 0.2916 | 0.3018 | 0.3115 | 0.0080  | 0.0102  | - |
| 0.0046 | 1   | .   |                           |        |        |        |         |         |   |
| 3464   | CA  | CA  | . PRO PRO PRO B B 17 17 . | 0.2990 | 0.3082 | 0.3078 | 0.0067  | 0.0076  | - |
| 0.0066 | 1   | .   |                           |        |        |        |         |         |   |
| 3465   | CB  | CB  | . PRO PRO PRO B B 17 17 . | 0.3017 | 0.2813 | 0.3166 | 0.0082  | 0.0023  | - |
| 0.0074 | 1   | .   |                           |        |        |        |         |         |   |
| 3466   | CG  | CG  | . PRO PRO PRO B B 17 17 . | 0.2844 | 0.2937 | 0.3027 | 0.0119  | 0.0071  | - |
| 0.0135 | 1   | .   |                           |        |        |        |         |         |   |
| 3467   | CD  | CD  | . PRO PRO PRO B B 17 17 . | 0.3053 | 0.3090 | 0.2873 | 0.0102  | -0.0027 |   |
| 0.0028 | 1   | .   |                           |        |        |        |         |         |   |
| 3468   | C   | C   | . PRO PRO PRO B B 17 17 . | 0.2880 | 0.3147 | 0.3121 | -0.0036 | 0.0058  | - |
| 0.0070 | 1   | .   |                           |        |        |        |         |         |   |
| 3469   | O   | O   | . PRO PRO PRO B B 17 17 . | 0.2796 | 0.3272 | 0.3158 | -0.0044 | 0.0041  | - |
| 0.0138 | 1   | .   |                           |        |        |        |         |         |   |
| 3470   | N   | N   | . THR THR THR B B 18 18 . | 0.2868 | 0.3068 | 0.3152 | -0.0023 | 0.0163  | - |
| 0.0014 | 1   | .   |                           |        |        |        |         |         |   |
| 3471   | CA  | CA  | . THR THR THR B B 18 18 . | 0.2652 | 0.3016 | 0.3022 | -0.0047 | 0.0068  |   |
| 0.0050 | 1   | .   |                           |        |        |        |         |         |   |
| 3472   | CB  | CB  | . THR THR THR B B 18 18 . | 0.2516 | 0.3042 | 0.3013 | -0.0036 | 0.0115  |   |
| 0.0127 | 1   | .   |                           |        |        |        |         |         |   |
| 3473   | OG1 | OG1 | . THR THR THR B B 18 18 . | 0.2690 | 0.3361 | 0.3438 | -0.0224 | 0.0154  |   |
| 0.0327 | 1   | .   |                           |        |        |        |         |         |   |
| 3474   | CG2 | CG2 | . THR THR THR B B 18 18 . | 0.2873 | 0.3037 | 0.2810 | -0.0061 | 0.0417  |   |
| 0.0132 | 1   | .   |                           |        |        |        |         |         |   |
| 3475   | C   | C   | . THR THR THR B B 18 18 . | 0.2737 | 0.3115 | 0.3097 | 0.0116  | 0.0095  |   |
| 0.0096 | 1   | .   |                           |        |        |        |         |         |   |
| 3476   | O   | O   | . THR THR THR B B 18 18 . | 0.2548 | 0.3421 | 0.3172 | 0.0367  | 0.0062  | - |
| 0.0008 | 1   | .   |                           |        |        |        |         |         |   |
| 3477   | N   | N   | . VAL VAL VAL B B 19 19 . | 0.2646 | 0.3179 | 0.3204 | 0.0007  | -0.0036 |   |
| 0.0073 | 1   | .   |                           |        |        |        |         |         |   |
| 3478   | CA  | CA  | . VAL VAL VAL B B 19 19 . | 0.3038 | 0.3206 | 0.3473 | 0.0140  | -0.0102 |   |
| 0.0152 | 1   | .   |                           |        |        |        |         |         |   |
| 3479   | CB  | CB  | . VAL VAL VAL B B 19 19 . | 0.2933 | 0.3064 | 0.3494 | 0.0097  | -0.0115 |   |
| 0.0171 | 1   | .   |                           |        |        |        |         |         |   |
| 3480   | CG1 | CG1 | . VAL VAL VAL B B 19 19 . | 0.3225 | 0.3076 | 0.3821 | 0.0062  | -0.0015 |   |
| 0.0125 | 1   | .   |                           |        |        |        |         |         |   |
| 3481   | CG2 | CG2 | . VAL VAL VAL B B 19 19 . | 0.3365 | 0.3099 | 0.3496 | 0.0170  | 0.0155  | - |
| 0.0106 | 1   | .   |                           |        |        |        |         |         |   |
| 3482   | C   | C   | . VAL VAL VAL B B 19 19 . | 0.2940 | 0.3269 | 0.3420 | 0.0151  | -0.0112 |   |
| 0.0157 | 1   | .   |                           |        |        |        |         |         |   |
| 3483   | O   | O   | . VAL VAL VAL B B 19 19 . | 0.3332 | 0.3304 | 0.3359 | 0.0296  | -0.0158 |   |
| 0.0247 | 1   | .   |                           |        |        |        |         |         |   |
| 3484   | N   | N   | . GLU GLU GLU B B 20 20 . | 0.2354 | 0.3376 | 0.3516 | 0.0183  | -0.0047 |   |
| 0.0142 | 1   | .   |                           |        |        |        |         |         |   |
| 3485   | CA  | CA  | . GLU GLU GLU B B 20 20 . | 0.2392 | 0.3429 | 0.3573 | 0.0066  | -0.0025 |   |
| 0.0031 | 1   | .   |                           |        |        |        |         |         |   |
| 3486   | CB  | CB  | . GLU GLU GLU B B 20 20 . | 0.1983 | 0.3507 | 0.3662 | 0.0040  | -0.0035 |   |
| 0.0072 | 1   | .   |                           |        |        |        |         |         |   |
| 3487   | CG  | CG  | . GLU GLU GLU B B 20 20 . | 0.2955 | 0.3302 | 0.3625 | 0.0259  | 0.0287  | - |
| 0.0174 | 1   | .   |                           |        |        |        |         |         |   |
| 3488   | CD  | CD  | . GLU GLU GLU B B 20 20 . | 0.4333 | 0.3222 | 0.4216 | 0.0254  | 0.0557  |   |
| 0.0013 | 1   | .   |                           |        |        |        |         |         |   |
| 3489   | OE1 | OE1 | . GLU GLU GLU B B 20 20 . | 0.4616 | 0.4275 | 0.4987 | 0.0118  | 0.1292  |   |
| 0.0226 | 1   | .   |                           |        |        |        |         |         |   |
| 3490   | OE2 | OE2 | . GLU GLU GLU B B 20 20 . | 0.5280 | 0.2912 | 0.4008 | 0.0472  | 0.0964  | - |
| 0.0433 | 1   | .   |                           |        |        |        |         |         |   |
| 3491   | C   | C   | . GLU GLU GLU B B 20 20 . | 0.2340 | 0.3589 | 0.3597 | 0.0072  | -0.0105 | - |
| 0.0147 | 1   | .   |                           |        |        |        |         |         |   |
| 3492   | O   | O   | . GLU GLU GLU B B 20 20 . | 0.1698 | 0.3930 | 0.3695 | 0.0102  | -0.0211 | - |
| 0.0143 | 1   | .   |                           |        |        |        |         |         |   |

|        |     |     |                           |        |        |        |         |         |   |
|--------|-----|-----|---------------------------|--------|--------|--------|---------|---------|---|
| 3493   | N   | N   | . VAL VAL VAL B B 21 21 . | 0.2878 | 0.3729 | 0.3632 | -0.0049 | 0.0014  | - |
| 0.0188 | 1   | .   |                           |        |        |        |         |         |   |
| 3494   | CA  | CA  | . VAL VAL VAL B B 21 21 . | 0.3008 | 0.3813 | 0.3756 | -0.0056 | -0.0107 | - |
| 0.0163 | 1   | .   |                           |        |        |        |         |         |   |
| 3495   | CB  | CB  | . VAL VAL VAL B B 21 21 . | 0.3144 | 0.3888 | 0.3777 | -0.0217 | -0.0062 | - |
| 0.0105 | 1   | .   |                           |        |        |        |         |         |   |
| 3496   | CG1 | CG1 | . VAL VAL VAL B B 21 21 . | 0.2238 | 0.4026 | 0.3724 | -0.0189 | -0.0324 | - |
| 0.0247 | 1   | .   |                           |        |        |        |         |         |   |
| 3497   | CG2 | CG2 | . VAL VAL VAL B B 21 21 . | 0.2930 | 0.3926 | 0.4126 | -0.0485 | -0.0370 | - |
| 0.0374 | 1   | .   |                           |        |        |        |         |         |   |
| 3498   | C   | C   | . VAL VAL VAL B B 21 21 . | 0.3439 | 0.3901 | 0.3882 | -0.0031 | -0.0037 | - |
| 0.0077 | 1   | .   |                           |        |        |        |         |         |   |
| 3499   | O   | O   | . VAL VAL VAL B B 21 21 . | 0.3624 | 0.4052 | 0.3876 | -0.0019 | -0.0037 | - |
| 0.0057 | 1   | .   |                           |        |        |        |         |         |   |
| 3500   | N   | N   | . ASP ASP ASP B B 22 22 . | 0.3832 | 0.4108 | 0.3902 | 0.0047  | 0.0000  | - |
| 0.0056 | 1   | .   |                           |        |        |        |         |         |   |
| 3501   | CA  | CA  | . ASP ASP ASP B B 22 22 . | 0.3991 | 0.4092 | 0.4078 | 0.0017  | -0.0030 | - |
| 0.0009 | 1   | .   |                           |        |        |        |         |         |   |
| 3502   | CB  | CB  | . ASP ASP ASP B B 22 22 . | 0.3897 | 0.4083 | 0.4012 | 0.0126  | -0.0044 | - |
| 0.0051 | 1   | .   |                           |        |        |        |         |         |   |
| 3503   | CG  | CG  | . ASP ASP ASP B B 22 22 . | 0.4064 | 0.4615 | 0.4225 | -0.0051 | -0.0031 | - |
| 0.0127 | 1   | .   |                           |        |        |        |         |         |   |
| 3504   | OD1 | OD1 | . ASP ASP ASP B B 22 22 . | 0.3986 | 0.5459 | 0.4303 | -0.0305 | -0.0577 | - |
| 0.0614 | 1   | .   |                           |        |        |        |         |         |   |
| 3505   | OD2 | OD2 | . ASP ASP ASP B B 22 22 . | 0.3794 | 0.4912 | 0.4474 | 0.0105  | 0.0232  | - |
| 0.0366 | 1   | .   |                           |        |        |        |         |         |   |
| 3506   | C   | C   | . ASP ASP ASP B B 22 22 . | 0.4195 | 0.4257 | 0.4153 | 0.0071  | -0.0057 | - |
| 0.0010 | 1   | .   |                           |        |        |        |         |         |   |
| 3507   | O   | O   | . ASP ASP ASP B B 22 22 . | 0.4077 | 0.4387 | 0.4107 | 0.0081  | -0.0030 | - |
| 0.0010 | 1   | .   |                           |        |        |        |         |         |   |
| 3508   | N   | N   | . LEU LEU LEU B B 23 23 . | 0.4386 | 0.4531 | 0.4227 | 0.0023  | -0.0085 | - |
| 0.0006 | 1   | .   |                           |        |        |        |         |         |   |
| 3509   | CA  | CA  | . LEU LEU LEU B B 23 23 . | 0.4456 | 0.4695 | 0.4515 | 0.0030  | 0.0015  | - |
| 0.0064 | 1   | .   |                           |        |        |        |         |         |   |
| 3510   | CB  | CB  | . LEU LEU LEU B B 23 23 . | 0.4492 | 0.4630 | 0.4426 | 0.0017  | -0.0006 | - |
| 0.0103 | 1   | .   |                           |        |        |        |         |         |   |
| 3511   | CG  | CG  | . LEU LEU LEU B B 23 23 . | 0.4538 | 0.4498 | 0.4385 | -0.0240 | -0.0035 | - |
| 0.0112 | 1   | .   |                           |        |        |        |         |         |   |
| 3512   | CD1 | CD1 | . LEU LEU LEU B B 23 23 . | 0.4494 | 0.4588 | 0.3756 | -0.0389 | 0.0035  | - |
| 0.0527 | 1   | .   |                           |        |        |        |         |         |   |
| 3513   | CD2 | CD2 | . LEU LEU LEU B B 23 23 . | 0.4268 | 0.4856 | 0.4673 | -0.0416 | 0.0150  | - |
| 0.0215 | 1   | .   |                           |        |        |        |         |         |   |
| 3514   | C   | C   | . LEU LEU LEU B B 23 23 . | 0.4615 | 0.4795 | 0.4684 | 0.0077  | 0.0015  | - |
| 0.0130 | 1   | .   |                           |        |        |        |         |         |   |
| 3515   | O   | O   | . LEU LEU LEU B B 23 23 . | 0.4441 | 0.4936 | 0.4885 | 0.0172  | 0.0089  | - |
| 0.0244 | 1   | .   |                           |        |        |        |         |         |   |
| 3516   | N   | N   | . TYR TYR TYR B B 24 24 . | 0.4523 | 0.4970 | 0.4728 | 0.0114  | -0.0069 | - |
| 0.0164 | 1   | .   |                           |        |        |        |         |         |   |
| 3517   | CA  | CA  | . TYR TYR TYR B B 24 24 . | 0.4708 | 0.5068 | 0.4900 | 0.0004  | -0.0076 | - |
| 0.0106 | 1   | .   |                           |        |        |        |         |         |   |
| 3518   | CB  | CB  | . TYR TYR TYR B B 24 24 . | 0.4753 | 0.5172 | 0.4990 | 0.0000  | -0.0019 | - |
| 0.0127 | 1   | .   |                           |        |        |        |         |         |   |
| 3519   | CG  | CG  | . TYR TYR TYR B B 24 24 . | 0.5198 | 0.5529 | 0.5062 | -0.0072 | -0.0104 | - |
| 0.0120 | 1   | .   |                           |        |        |        |         |         |   |
| 3520   | CD1 | CD1 | . TYR TYR TYR B B 24 24 . | 0.5381 | 0.5801 | 0.5249 | -0.0191 | -0.0027 | - |
| 0.0005 | 1   | .   |                           |        |        |        |         |         |   |
| 3521   | CE1 | CE1 | . TYR TYR TYR B B 24 24 . | 0.5425 | 0.6042 | 0.5525 | -0.0222 | -0.0034 | - |
| 0.0040 | 1   | .   |                           |        |        |        |         |         |   |
| 3522   | CZ  | CZ  | . TYR TYR TYR B B 24 24 . | 0.5536 | 0.5911 | 0.5420 | -0.0073 | -0.0161 | - |
| 0.0067 | 1   | .   |                           |        |        |        |         |         |   |

|        |     |     |                           |        |        |        |         |         |
|--------|-----|-----|---------------------------|--------|--------|--------|---------|---------|
| 3523   | OH  | OH  | . TYR TYR TYR B B 24 24 . | 0.5653 | 0.6658 | 0.5570 | -0.0120 | -0.0307 |
| 0.0037 | 1   | .   |                           |        |        |        |         |         |
| 3524   | CE2 | CE2 | . TYR TYR TYR B B 24 24 . | 0.5307 | 0.6109 | 0.5429 | -0.0053 | -0.0089 |
| 0.0332 | 1   | .   |                           |        |        |        |         |         |
| 3525   | CD2 | CD2 | . TYR TYR TYR B B 24 24 . | 0.5470 | 0.5806 | 0.5315 | -0.0115 | -0.0089 |
| 0.0258 | 1   | .   |                           |        |        |        |         |         |
| 3526   | C   | C   | . TYR TYR TYR B B 24 24 . | 0.4896 | 0.5145 | 0.5007 | -0.0005 | -0.0066 |
| 0.0098 | 1   | .   |                           |        |        |        |         |         |
| 3527   | O   | O   | . TYR TYR TYR B B 24 24 . | 0.4611 | 0.5057 | 0.4954 | -0.0014 | -0.0130 |
| 0.0221 | 1   | .   |                           |        |        |        |         |         |
| 3528   | N   | N   | . THR THR THR B B 25 25 . | 0.5103 | 0.5180 | 0.5160 | -0.0126 | -0.0070 |
| 0.0077 | 1   | .   |                           |        |        |        |         |         |
| 3529   | CA  | CA  | . THR THR THR B B 25 25 . | 0.5292 | 0.5424 | 0.5248 | -0.0108 | -0.0042 |
| 0.0067 | 1   | .   |                           |        |        |        |         |         |
| 3530   | CB  | CB  | . THR THR THR B B 25 25 . | 0.5356 | 0.5383 | 0.5245 | -0.0102 | -0.0083 |
| 0.0059 | 1   | .   |                           |        |        |        |         |         |
| 3531   | OG1 | OG1 | . THR THR THR B B 25 25 . | 0.5047 | 0.5817 | 0.5097 | 0.0141  | -0.0111 |
| 0.0053 | 1   | .   |                           |        |        |        |         | -       |
| 3532   | CG2 | CG2 | . THR THR THR B B 25 25 . | 0.5531 | 0.5593 | 0.5020 | -0.0052 | -0.0027 |
| 0.0086 | 1   | .   |                           |        |        |        |         |         |
| 3533   | C   | C   | . THR THR THR B B 25 25 . | 0.5318 | 0.5510 | 0.5391 | -0.0206 | -0.0040 |
| 0.0149 | 1   | .   |                           |        |        |        |         |         |
| 3534   | O   | O   | . THR THR THR B B 25 25 . | 0.5292 | 0.5691 | 0.5381 | -0.0306 | -0.0013 |
| 0.0286 | 1   | .   |                           |        |        |        |         |         |
| 3535   | N   | N   | . ALA ALA ALA B B 26 26 . | 0.5304 | 0.5646 | 0.5576 | -0.0202 | -0.0054 |
| 0.0159 | 1   | .   |                           |        |        |        |         |         |
| 3536   | CA  | CA  | . ALA ALA ALA B B 26 26 . | 0.5316 | 0.5550 | 0.5611 | -0.0185 | -0.0093 |
| 0.0182 | 1   | .   |                           |        |        |        |         |         |
| 3537   | CB  | CB  | . ALA ALA ALA B B 26 26 . | 0.5080 | 0.5374 | 0.5491 | -0.0235 | -0.0141 |
| 0.0277 | 1   | .   |                           |        |        |        |         |         |
| 3538   | C   | C   | . ALA ALA ALA B B 26 26 . | 0.5295 | 0.5618 | 0.5589 | -0.0154 | -0.0162 |
| 0.0126 | 1   | .   |                           |        |        |        |         |         |
| 3539   | O   | O   | . ALA ALA ALA B B 26 26 . | 0.5326 | 0.5851 | 0.5589 | -0.0058 | -0.0331 |
| 0.0104 | 1   | .   |                           |        |        |        |         |         |
| 3540   | N   | N   | . LYS LYS LYS B B 27 27 . | 0.5459 | 0.5739 | 0.5640 | -0.0108 | -0.0178 |
| 0.0010 | 1   | .   |                           |        |        |        |         |         |
| 3541   | CA  | CA  | . LYS LYS LYS B B 27 27 . | 0.5541 | 0.5724 | 0.5629 | -0.0041 | -0.0175 |
| 0.0004 | 1   | .   |                           |        |        |        |         |         |
| 3542   | CB  | CB  | . LYS LYS LYS B B 27 27 . | 0.5666 | 0.5955 | 0.5692 | -0.0096 | -0.0105 |
| 0.0079 | 1   | .   |                           |        |        |        |         |         |
| 3543   | CG  | CG  | . LYS LYS LYS B B 27 27 . | 0.6109 | 0.6353 | 0.6026 | -0.0162 | -0.0205 |
| 0.0032 | 1   | .   |                           |        |        |        |         | -       |
| 3544   | CD  | CD  | . LYS LYS LYS B B 27 27 . | 0.6872 | 0.6573 | 0.6489 | -0.0334 | -0.0085 |
| 0.0402 | 1   | .   |                           |        |        |        |         | -       |
| 3545   | CE  | CE  | . LYS LYS LYS B B 27 27 . | 0.6976 | 0.7255 | 0.7217 | -0.0288 | -0.0041 |
| 0.0500 | 1   | .   |                           |        |        |        |         | -       |
| 3546   | NZ  | NZ  | . LYS LYS LYS B B 27 27 . | 0.7488 | 0.7442 | 0.7502 | -0.0383 | 0.0013  |
| 0.0902 | 1   | .   |                           |        |        |        |         | -       |
| 3547   | C   | C   | . LYS LYS LYS B B 27 27 . | 0.5523 | 0.5602 | 0.5483 | 0.0002  | -0.0192 |
| 0.0031 | 1   | .   |                           |        |        |        |         |         |
| 3548   | O   | O   | . LYS LYS LYS B B 27 27 . | 0.5315 | 0.5735 | 0.5463 | 0.0080  | -0.0222 |
| 0.0116 | 1   | .   |                           |        |        |        |         |         |
| 3549   | N   | N   | . GLY GLY GLY B B 28 28 . | 0.5414 | 0.5428 | 0.5328 | -0.0064 | -0.0272 |
| 0.0150 | 1   | .   |                           |        |        |        |         |         |
| 3550   | CA  | CA  | . GLY GLY GLY B B 28 28 . | 0.5204 | 0.5210 | 0.5310 | -0.0181 | -0.0182 |
| 0.0130 | 1   | .   |                           |        |        |        |         |         |
| 3551   | C   | C   | . GLY GLY GLY B B 28 28 . | 0.5085 | 0.5060 | 0.5159 | -0.0160 | -0.0175 |
| 0.0133 | 1   | .   |                           |        |        |        |         |         |
| 3552   | O   | O   | . GLY GLY GLY B B 28 28 . | 0.4963 | 0.4886 | 0.4960 | -0.0309 | -0.0200 |
| 0.0079 | 1   | .   |                           |        |        |        |         |         |

|        |     |     |                         |                                        |
|--------|-----|-----|-------------------------|----------------------------------------|
| 3553   | N   | N   | . LEU LEU LEU B B 29 29 | . 0.4935 0.4928 0.5092 -0.0127 -0.0103 |
| 0.0181 | 1   | .   |                         |                                        |
| 3554   | CA  | CA  | . LEU LEU LEU B B 29 29 | . 0.4797 0.4774 0.4976 -0.0096 -0.0100 |
| 0.0164 | 1   | .   |                         |                                        |
| 3555   | CB  | CB  | . LEU LEU LEU B B 29 29 | . 0.4841 0.4839 0.5039 -0.0105 -0.0231 |
| 0.0270 | 1   | .   |                         |                                        |
| 3556   | CG  | CG  | . LEU LEU LEU B B 29 29 | . 0.4851 0.4955 0.5059 -0.0190 -0.0400 |
| 0.0416 | 1   | .   |                         |                                        |
| 3557   | CD1 | CD1 | . LEU LEU LEU B B 29 29 | . 0.4662 0.5078 0.4524 -0.0042 -0.0675 |
| 0.0387 | 1   | .   |                         |                                        |
| 3558   | CD2 | CD2 | . LEU LEU LEU B B 29 29 | . 0.4256 0.5441 0.5317 -0.0370 -0.0739 |
| 0.0398 | 1   | .   |                         |                                        |
| 3559   | C   | C   | . LEU LEU LEU B B 29 29 | . 0.4636 0.4650 0.4964 -0.0042 0.0001  |
| 0.0071 | 1   | .   |                         |                                        |
| 3560   | O   | O   | . LEU LEU LEU B B 29 29 | . 0.4558 0.4618 0.5152 -0.0104 0.0036  |
| 0.0132 | 1   | .   |                         |                                        |
| 3561   | N   | N   | . PHE PHE PHE B B 30 30 | . 0.4382 0.4509 0.4642 0.0017 0.0070   |
| 0.0030 | 1   | .   |                         |                                        |
| 3562   | CA  | CA  | . PHE PHE PHE B B 30 30 | . 0.4158 0.4444 0.4462 -0.0032 0.0039  |
| 0.0055 | 1   | .   |                         |                                        |
| 3563   | CB  | CB  | . PHE PHE PHE B B 30 30 | . 0.4059 0.4593 0.4398 -0.0165 0.0160  |
| 0.0127 | 1   | .   |                         |                                        |
| 3564   | CG  | CG  | . PHE PHE PHE B B 30 30 | . 0.3991 0.4739 0.4638 -0.0112 -0.0001 |
| 0.0019 | 1   | .   |                         |                                        |
| 3565   | CD1 | CD1 | . PHE PHE PHE B B 30 30 | . 0.3097 0.4674 0.4550 0.0083 -0.0101  |
| 0.0352 | 1   | .   |                         |                                        |
| 3566   | CE1 | CE1 | . PHE PHE PHE B B 30 30 | . 0.3820 0.4924 0.4568 -0.0286 -0.0259 |
| 0.0110 | 1   | .   |                         |                                        |
| 3567   | CZ  | CZ  | . PHE PHE PHE B B 30 30 | . 0.4016 0.4694 0.4493 -0.0132 -0.0031 |
| 0.0069 | 1   | .   |                         |                                        |
| 3568   | CE2 | CE2 | . PHE PHE PHE B B 30 30 | . 0.3706 0.4769 0.4117 -0.0095 0.0005  |
| 0.0116 | 1   | .   |                         |                                        |
| 3569   | CD2 | CD2 | . PHE PHE PHE B B 30 30 | . 0.4234 0.4990 0.4789 -0.0311 0.0255  |
| 0.0360 | 1   | .   |                         |                                        |
| 3570   | C   | C   | . PHE PHE PHE B B 30 30 | . 0.4168 0.4350 0.4332 0.0026 0.0024   |
| 0.0016 | 1   | .   |                         |                                        |
| 3571   | O   | O   | . PHE PHE PHE B B 30 30 | . 0.4209 0.4378 0.4402 0.0142 0.0020   |
| 0.0061 | 1   | .   |                         |                                        |
| 3572   | N   | N   | . ARG ARG ARG B B 31 31 | . 0.3783 0.4172 0.4119 -0.0037 0.0064  |
| 0.0027 | 1   | .   |                         |                                        |
| 3573   | CA  | CA  | . ARG ARG ARG B B 31 31 | . 0.3664 0.4042 0.3854 -0.0040 -0.0041 |
| 0.0056 | 1   | .   |                         |                                        |
| 3574   | CB  | CB  | . ARG ARG ARG B B 31 31 | . 0.3775 0.3873 0.3810 -0.0053 -0.0092 |
| 0.0246 | 1   | .   |                         |                                        |
| 3575   | CG  | CG  | . ARG ARG ARG B B 31 31 | . 0.3541 0.3969 0.3600 0.0031 -0.0230  |
| 0.0421 | 1   | .   |                         |                                        |
| 3576   | CD  | CD  | . ARG ARG ARG B B 31 31 | . 0.3632 0.4095 0.4002 0.0171 -0.0157  |
| 0.0322 | 1   | .   |                         |                                        |
| 3577   | NE  | NE  | . ARG ARG ARG B B 31 31 | . 0.3955 0.3871 0.4004 0.0383 -0.0091  |
| 0.0296 | 1   | .   |                         |                                        |
| 3578   | CZ  | CZ  | . ARG ARG ARG B B 31 31 | . 0.4023 0.4007 0.4214 0.0420 -0.0382  |
| 0.0460 | 1   | .   |                         |                                        |
| 3579   | NH1 | NH1 | . ARG ARG ARG B B 31 31 | . 0.3735 0.4657 0.4226 0.0095 -0.0520  |
| 0.1042 | 1   | .   |                         |                                        |
| 3580   | NH2 | NH2 | . ARG ARG ARG B B 31 31 | . 0.4951 0.3221 0.4228 0.0456 -0.0877  |
| 0.0564 | 1   | .   |                         |                                        |
| 3581   | C   | C   | . ARG ARG ARG B B 31 31 | . 0.3464 0.3952 0.3805 -0.0087 -0.0093 |
| 0.0042 | 1   | .   |                         |                                        |
| 3582   | O   | O   | . ARG ARG ARG B B 31 31 | . 0.3050 0.4303 0.3780 -0.0187 -0.0033 |
| 0.0114 | 1   | .   |                         |                                        |

|        |     |     |                         |                                          |
|--------|-----|-----|-------------------------|------------------------------------------|
| 3583   | N   | N   | . ALA ALA ALA B B 32 32 | . 0.3560 0.3970 0.3779 0.0030 -0.0080    |
| 0.0127 | 1   | .   |                         |                                          |
| 3584   | CA  | CA  | . ALA ALA ALA B B 32 32 | . 0.3650 0.3963 0.3853 0.0048 -0.0042    |
| 0.0054 | 1   | .   |                         |                                          |
| 3585   | CB  | CB  | . ALA ALA ALA B B 32 32 | . 0.3921 0.4028 0.3989 0.0036 -0.0091    |
| 0.0164 | 1   | .   |                         |                                          |
| 3586   | C   | C   | . ALA ALA ALA B B 32 32 | . 0.3529 0.3907 0.3807 0.0080 -0.0015    |
| 0.0051 | 1   | .   |                         |                                          |
| 3587   | O   | O   | . ALA ALA ALA B B 32 32 | . 0.3145 0.4038 0.3791 0.0219 0.0023     |
| 0.0005 | 1   | .   |                         |                                          |
| 3588   | N   | N   | . ALA ALA ALA B B 33 33 | . 0.3339 0.3736 0.3841 0.0133 -0.0057    |
| 0.0088 | 1   | .   |                         |                                          |
| 3589   | CA  | CA  | . ALA ALA ALA B B 33 33 | . 0.3296 0.3517 0.3567 0.0068 -0.0051    |
| 0.0055 | 1   | .   |                         |                                          |
| 3590   | CB  | CB  | . ALA ALA ALA B B 33 33 | . 0.3399 0.3667 0.3464 0.0157 -0.0178    |
| 0.0132 | 1   | .   |                         |                                          |
| 3591   | C   | C   | . ALA ALA ALA B B 33 33 | . 0.3247 0.3422 0.3452 0.0017 -0.0037    |
| 0.0000 | 1   | .   |                         |                                          |
| 3592   | O   | O   | . ALA ALA ALA B B 33 33 | . 0.3009 0.3203 0.3501 -0.0016 0.0004 -  |
| 0.0094 | 1   | .   |                         |                                          |
| 3593   | N   | N   | . VAL VAL VAL B B 34 34 | . 0.2937 0.3410 0.3318 -0.0056 0.0019    |
| 0.0131 | 1   | .   |                         |                                          |
| 3594   | CA  | CA  | . VAL VAL VAL B B 34 34 | . 0.2419 0.3218 0.3000 -0.0108 0.0151    |
| 0.0023 | 1   | .   |                         |                                          |
| 3595   | CB  | CB  | . VAL VAL VAL B B 34 34 | . 0.2146 0.3044 0.2963 -0.0147 0.0210    |
| 0.0081 | 1   | .   |                         |                                          |
| 3596   | CG1 | CG1 | . VAL VAL VAL B B 34 34 | . 0.1257 0.3296 0.3103 0.0091 0.0296     |
| 0.0030 | 1   | .   |                         |                                          |
| 3597   | CG2 | CG2 | . VAL VAL VAL B B 34 34 | . 0.2135 0.2794 0.2420 -0.0344 0.0185 -  |
| 0.0021 | 1   | .   |                         |                                          |
| 3598   | C   | C   | . VAL VAL VAL B B 34 34 | . 0.2544 0.3297 0.2930 -0.0043 0.0081 -  |
| 0.0045 | 1   | .   |                         |                                          |
| 3599   | O   | O   | . VAL VAL VAL B B 34 34 | . 0.2426 0.3662 0.2803 -0.0133 -0.0105 - |
| 0.0209 | 1   | .   |                         |                                          |
| 3600   | N   | N   | . PRO PRO PRO B B 35 35 | . 0.2611 0.3098 0.2846 -0.0004 0.0169 -  |
| 0.0014 | 1   | .   |                         |                                          |
| 3601   | CA  | CA  | . PRO PRO PRO B B 35 35 | . 0.2727 0.2891 0.2815 0.0057 0.0181 -   |
| 0.0020 | 1   | .   |                         |                                          |
| 3602   | CB  | CB  | . PRO PRO PRO B B 35 35 | . 0.2504 0.2850 0.2799 0.0082 0.0208     |
| 0.0062 | 1   | .   |                         |                                          |
| 3603   | CG  | CG  | . PRO PRO PRO B B 35 35 | . 0.2763 0.3011 0.2907 0.0068 0.0212 -   |
| 0.0215 | 1   | .   |                         |                                          |
| 3604   | CD  | CD  | . PRO PRO PRO B B 35 35 | . 0.2464 0.2991 0.2755 -0.0077 0.0378 -  |
| 0.0095 | 1   | .   |                         |                                          |
| 3605   | C   | C   | . PRO PRO PRO B B 35 35 | . 0.2937 0.3047 0.2923 0.0048 0.0136     |
| 0.0007 | 1   | .   |                         |                                          |
| 3606   | O   | O   | . PRO PRO PRO B B 35 35 | . 0.3692 0.3107 0.3289 0.0307 0.0148     |
| 0.0071 | 1   | .   |                         |                                          |
| 3607   | N   | N   | . SER SER SER B B 36 36 | . 0.2909 0.3054 0.2929 0.0064 0.0055 -   |
| 0.0118 | 1   | .   |                         |                                          |
| 3608   | CA  | CA  | . SER SER SER B B 36 36 | . 0.3000 0.2999 0.3004 -0.0037 0.0041 -  |
| 0.0072 | 1   | .   |                         |                                          |
| 3609   | CB  | CB  | . SER SER SER B B 36 36 | . 0.3268 0.3144 0.3328 -0.0011 0.0079 -  |
| 0.0090 | 1   | .   |                         |                                          |
| 3610   | OG  | OG  | . SER SER SER B B 36 36 | . 0.3093 0.3311 0.3519 -0.0311 0.0314 -  |
| 0.0032 | 1   | .   |                         |                                          |
| 3611   | C   | C   | . SER SER SER B B 36 36 | . 0.3254 0.3009 0.2990 -0.0042 0.0009    |
| 0.0019 | 1   | .   |                         |                                          |
| 3612   | O   | O   | . SER SER SER B B 36 36 | . 0.3262 0.3096 0.2912 -0.0183 0.0095    |
| 0.0059 | 1   | .   |                         |                                          |

|        |     |     |                           |        |        |        |         |         |   |
|--------|-----|-----|---------------------------|--------|--------|--------|---------|---------|---|
| 3613   | N   | N   | . GLY GLY GLY B B 37 37 . | 0.3348 | 0.3281 | 0.3017 | 0.0049  | -0.0131 | - |
| 0.0104 | 1   | .   |                           |        |        |        |         |         |   |
| 3614   | CA  | CA  | . GLY GLY GLY B B 37 37 . | 0.3402 | 0.3137 | 0.2986 | 0.0047  | -0.0101 | - |
| 0.0110 | 1   | .   |                           |        |        |        |         |         |   |
| 3615   | C   | C   | . GLY GLY GLY B B 37 37 . | 0.3320 | 0.3201 | 0.2981 | 0.0163  | -0.0133 | - |
| 0.0042 | 1   | .   |                           |        |        |        |         |         |   |
| 3616   | O   | O   | . GLY GLY GLY B B 37 37 . | 0.3901 | 0.3384 | 0.2997 | 0.0159  | -0.0371 | - |
| 0.0015 | 1   | .   |                           |        |        |        |         |         |   |
| 3617   | N   | N   | . ALA ALA ALA B B 38 38 . | 0.3325 | 0.3143 | 0.2966 | 0.0068  | -0.0099 | - |
| 0.0064 | 1   | .   |                           |        |        |        |         |         |   |
| 3618   | CA  | CA  | . ALA ALA ALA B B 38 38 . | 0.3248 | 0.3130 | 0.3039 | 0.0040  | -0.0120 | - |
| 0.0040 | 1   | .   |                           |        |        |        |         |         |   |
| 3619   | CB  | CB  | . ALA ALA ALA B B 38 38 . | 0.3229 | 0.3186 | 0.2945 | 0.0045  | -0.0154 | - |
| 0.0019 | 1   | .   |                           |        |        |        |         |         |   |
| 3620   | C   | C   | . ALA ALA ALA B B 38 38 . | 0.3212 | 0.3167 | 0.3119 | 0.0012  | -0.0031 | - |
| 0.0041 | 1   | .   |                           |        |        |        |         |         |   |
| 3621   | O   | O   | . ALA ALA ALA B B 38 38 . | 0.3393 | 0.3280 | 0.3376 | 0.0119  | -0.0123 | - |
| 0.0069 | 1   | .   |                           |        |        |        |         |         |   |
| 3622   | N   | N   | . SER SER SER B B 39 39 . | 0.2985 | 0.3302 | 0.2970 | -0.0102 | -0.0049 | - |
| 0.0041 | 1   | .   |                           |        |        |        |         |         |   |
| 3623   | CA  | CA  | . SER SER SER B B 39 39 . | 0.2930 | 0.3227 | 0.3031 | 0.0014  | 0.0045  | - |
| 0.0067 | 1   | .   |                           |        |        |        |         |         |   |
| 3624   | CB  | CB  | . SER SER SER B B 39 39 . | 0.2995 | 0.3236 | 0.3030 | -0.0072 | 0.0245  | - |
| 0.0017 | 1   | .   |                           |        |        |        |         |         |   |
| 3625   | OG  | OG  | . SER SER SER B B 39 39 . | 0.2754 | 0.3070 | 0.2632 | 0.0216  | 0.0223  | - |
| 0.0344 | 1   | .   |                           |        |        |        |         |         |   |
| 3626   | C   | C   | . SER SER SER B B 39 39 . | 0.2852 | 0.3268 | 0.3093 | 0.0086  | -0.0015 | - |
| 0.0006 | 1   | .   |                           |        |        |        |         |         |   |
| 3627   | O   | O   | . SER SER SER B B 39 39 . | 0.2481 | 0.3447 | 0.3152 | 0.0068  | -0.0040 | - |
| 0.0040 | 1   | .   |                           |        |        |        |         |         |   |
| 3628   | N   | N   | . THR THR THR B B 40 40 . | 0.3050 | 0.3345 | 0.3230 | 0.0067  | -0.0113 | - |
| 0.0075 | 1   | .   |                           |        |        |        |         |         |   |
| 3629   | CA  | CA  | . THR THR THR B B 40 40 . | 0.3196 | 0.3425 | 0.3294 | 0.0052  | 0.0020  | - |
| 0.0000 | 1   | .   |                           |        |        |        |         |         |   |
| 3630   | CB  | CB  | . THR THR THR B B 40 40 . | 0.3399 | 0.3415 | 0.3240 | 0.0052  | 0.0070  | - |
| 0.0051 | 1   | .   |                           |        |        |        |         |         |   |
| 3631   | OG1 | OG1 | . THR THR THR B B 40 40 . | 0.2876 | 0.3528 | 0.3369 | -0.0066 | 0.0268  | - |
| 0.0048 | 1   | .   |                           |        |        |        |         |         |   |
| 3632   | CG2 | CG2 | . THR THR THR B B 40 40 . | 0.3804 | 0.3395 | 0.3608 | 0.0187  | 0.0156  | - |
| 0.0063 | 1   | .   |                           |        |        |        |         |         |   |
| 3633   | C   | C   | . THR THR THR B B 40 40 . | 0.3244 | 0.3466 | 0.3209 | -0.0040 | -0.0012 | - |
| 0.0028 | 1   | .   |                           |        |        |        |         |         |   |
| 3634   | O   | O   | . THR THR THR B B 40 40 . | 0.3572 | 0.3120 | 0.3143 | -0.0139 | -0.0228 | - |
| 0.0024 | 1   | .   |                           |        |        |        |         |         |   |
| 3635   | N   | N   | . GLY GLY GLY B B 41 41 . | 0.2945 | 0.3570 | 0.3098 | -0.0073 | -0.0031 | - |
| 0.0047 | 1   | .   |                           |        |        |        |         |         |   |
| 3636   | CA  | CA  | . GLY GLY GLY B B 41 41 . | 0.2983 | 0.3463 | 0.3187 | -0.0058 | 0.0093  | - |
| 0.0054 | 1   | .   |                           |        |        |        |         |         |   |
| 3637   | C   | C   | . GLY GLY GLY B B 41 41 . | 0.2887 | 0.3393 | 0.3194 | -0.0005 | 0.0106  | - |
| 0.0020 | 1   | .   |                           |        |        |        |         |         |   |
| 3638   | O   | O   | . GLY GLY GLY B B 41 41 . | 0.3095 | 0.3687 | 0.3272 | 0.0270  | 0.0186  | - |
| 0.0145 | 1   | .   |                           |        |        |        |         |         |   |
| 3639   | N   | N   | . ILE ILE ILE B B 42 42 . | 0.2933 | 0.3527 | 0.3065 | 0.0021  | 0.0056  | - |
| 0.0031 | 1   | .   |                           |        |        |        |         |         |   |
| 3640   | CA  | CA  | . ILE ILE ILE B B 42 42 . | 0.2915 | 0.3424 | 0.3136 | -0.0090 | -0.0141 | - |
| 0.0016 | 1   | .   |                           |        |        |        |         |         |   |
| 3641   | CB  | CB  | . ILE ILE ILE B B 42 42 . | 0.2904 | 0.3588 | 0.3155 | -0.0097 | -0.0151 | - |
| 0.0008 | 1   | .   |                           |        |        |        |         |         |   |
| 3642   | CG1 | CG1 | . ILE ILE ILE B B 42 42 . | 0.2760 | 0.3596 | 0.3422 | -0.0187 | -0.0384 | - |
| 0.0231 | 1   | .   |                           |        |        |        |         |         |   |

|        |     |     |                           |        |        |        |         |         |   |
|--------|-----|-----|---------------------------|--------|--------|--------|---------|---------|---|
| 3643   | CD1 | CD1 | . ILE ILE ILE B B 42 42 . | 0.2158 | 0.4001 | 0.3599 | 0.0154  | -0.0207 |   |
| 0.0454 | 1   | .   |                           |        |        |        |         |         |   |
| 3644   | CG2 | CG2 | . ILE ILE ILE B B 42 42 . | 0.3010 | 0.3759 | 0.3473 | -0.0179 | -0.0426 |   |
| 0.0191 | 1   | .   |                           |        |        |        |         |         |   |
| 3645   | C   | C   | . ILE ILE ILE B B 42 42 . | 0.3151 | 0.3458 | 0.3223 | -0.0049 | -0.0091 | - |
| 0.0005 | 1   | .   |                           |        |        |        |         |         |   |
| 3646   | O   | O   | . ILE ILE ILE B B 42 42 . | 0.3255 | 0.3559 | 0.3141 | -0.0110 | -0.0088 | - |
| 0.0015 | 1   | .   |                           |        |        |        |         |         |   |
| 3647   | N   | N   | . TYR TYR TYR B B 43 43 . | 0.3259 | 0.3568 | 0.3074 | -0.0059 | -0.0159 |   |
| 0.0013 | 1   | .   |                           |        |        |        |         |         |   |
| 3648   | CA  | CA  | . TYR TYR TYR B B 43 43 . | 0.3386 | 0.3621 | 0.3191 | -0.0072 | -0.0072 | - |
| 0.0028 | 1   | .   |                           |        |        |        |         |         |   |
| 3649   | CB  | CB  | . TYR TYR TYR B B 43 43 . | 0.3560 | 0.3530 | 0.3165 | -0.0053 | -0.0105 | - |
| 0.0123 | 1   | .   |                           |        |        |        |         |         |   |
| 3650   | CG  | CG  | . TYR TYR TYR B B 43 43 . | 0.3743 | 0.3964 | 0.3560 | -0.0204 | -0.0135 |   |
| 0.0013 | 1   | .   |                           |        |        |        |         |         |   |
| 3651   | CD1 | CD1 | . TYR TYR TYR B B 43 43 . | 0.4383 | 0.4382 | 0.4209 | -0.0218 | 0.0039  | - |
| 0.0203 | 1   | .   |                           |        |        |        |         |         |   |
| 3652   | CE1 | CE1 | . TYR TYR TYR B B 43 43 . | 0.4492 | 0.4433 | 0.4510 | -0.0232 | 0.0038  |   |
| 0.0168 | 1   | .   |                           |        |        |        |         |         |   |
| 3653   | CZ  | CZ  | . TYR TYR TYR B B 43 43 . | 0.4514 | 0.4449 | 0.4708 | -0.0114 | 0.0110  |   |
| 0.0011 | 1   | .   |                           |        |        |        |         |         |   |
| 3654   | OH  | OH  | . TYR TYR TYR B B 43 43 . | 0.4068 | 0.4037 | 0.5083 | -0.0194 | -0.0192 |   |
| 0.0015 | 1   | .   |                           |        |        |        |         |         |   |
| 3655   | CE2 | CE2 | . TYR TYR TYR B B 43 43 . | 0.4434 | 0.4302 | 0.4674 | -0.0196 | 0.0272  |   |
| 0.0024 | 1   | .   |                           |        |        |        |         |         |   |
| 3656   | CD2 | CD2 | . TYR TYR TYR B B 43 43 . | 0.4097 | 0.3972 | 0.4468 | -0.0111 | -0.0084 |   |
| 0.0041 | 1   | .   |                           |        |        |        |         |         |   |
| 3657   | C   | C   | . TYR TYR TYR B B 43 43 . | 0.3285 | 0.3453 | 0.3161 | -0.0002 | -0.0020 |   |
| 0.0033 | 1   | .   |                           |        |        |        |         |         |   |
| 3658   | O   | O   | . TYR TYR TYR B B 43 43 . | 0.3450 | 0.3497 | 0.3098 | -0.0201 | -0.0207 | - |
| 0.0048 | 1   | .   |                           |        |        |        |         |         |   |
| 3659   | N   | N   | . GLU GLU GLU B B 44 44 . | 0.3282 | 0.3530 | 0.3407 | 0.0169  | 0.0103  |   |
| 0.0083 | 1   | .   |                           |        |        |        |         |         |   |
| 3660   | CA  | CA  | . GLU GLU GLU B B 44 44 . | 0.3199 | 0.3500 | 0.3496 | 0.0234  | 0.0036  |   |
| 0.0083 | 1   | .   |                           |        |        |        |         |         |   |
| 3661   | CB  | CB  | . GLU GLU GLU B B 44 44 . | 0.3158 | 0.3629 | 0.3396 | 0.0267  | -0.0018 |   |
| 0.0123 | 1   | .   |                           |        |        |        |         |         |   |
| 3662   | CG  | CG  | . GLU GLU GLU B B 44 44 . | 0.3458 | 0.3532 | 0.2907 | 0.0524  | -0.0195 |   |
| 0.0033 | 1   | .   |                           |        |        |        |         |         |   |
| 3663   | CD  | CD  | . GLU GLU GLU B B 44 44 . | 0.3400 | 0.3624 | 0.3640 | 0.0241  | -0.0192 | - |
| 0.0096 | 1   | .   |                           |        |        |        |         |         |   |
| 3664   | OE1 | OE1 | . GLU GLU GLU B B 44 44 . | 0.4321 | 0.4493 | 0.3769 | 0.0490  | -0.0864 |   |
| 0.0416 | 1   | .   |                           |        |        |        |         |         |   |
| 3665   | OE2 | OE2 | . GLU GLU GLU B B 44 44 . | 0.4704 | 0.3536 | 0.3719 | 0.0922  | 0.0182  | - |
| 0.0343 | 1   | .   |                           |        |        |        |         |         |   |
| 3666   | C   | C   | . GLU GLU GLU B B 44 44 . | 0.3210 | 0.3526 | 0.3533 | 0.0142  | 0.0091  |   |
| 0.0021 | 1   | .   |                           |        |        |        |         |         |   |
| 3667   | O   | O   | . GLU GLU GLU B B 44 44 . | 0.3023 | 0.3382 | 0.3648 | 0.0309  | 0.0015  | - |
| 0.0071 | 1   | .   |                           |        |        |        |         |         |   |
| 3668   | N   | N   | . ALA ALA ALA B B 45 45 . | 0.3310 | 0.3625 | 0.3643 | 0.0064  | 0.0079  |   |
| 0.0097 | 1   | .   |                           |        |        |        |         |         |   |
| 3669   | CA  | CA  | . ALA ALA ALA B B 45 45 . | 0.3327 | 0.3526 | 0.3674 | 0.0101  | 0.0150  | - |
| 0.0027 | 1   | .   |                           |        |        |        |         |         |   |
| 3670   | CB  | CB  | . ALA ALA ALA B B 45 45 . | 0.3085 | 0.3501 | 0.3741 | 0.0110  | 0.0200  |   |
| 0.0028 | 1   | .   |                           |        |        |        |         |         |   |
| 3671   | C   | C   | . ALA ALA ALA B B 45 45 . | 0.3562 | 0.3665 | 0.3762 | 0.0136  | 0.0106  | - |
| 0.0019 | 1   | .   |                           |        |        |        |         |         |   |
| 3672   | O   | O   | . ALA ALA ALA B B 45 45 . | 0.3356 | 0.3706 | 0.3797 | 0.0083  | 0.0199  | - |
| 0.0072 | 1   | .   |                           |        |        |        |         |         |   |



|        |     |     |                         |                                          |
|--------|-----|-----|-------------------------|------------------------------------------|
| 3673   | N   | N   | . LEU LEU LEU B B 46 46 | . 0.3792 0.3936 0.3757 0.0095 0.0119 -   |
| 0.0084 | 1   | .   |                         |                                          |
| 3674   | CA  | CA  | . LEU LEU LEU B B 46 46 | . 0.3811 0.3965 0.3909 0.0073 -0.0048 -  |
| 0.0139 | 1   | .   |                         |                                          |
| 3675   | CB  | CB  | . LEU LEU LEU B B 46 46 | . 0.3963 0.4022 0.4164 0.0074 -0.0005 -  |
| 0.0293 | 1   | .   |                         |                                          |
| 3676   | CG  | CG  | . LEU LEU LEU B B 46 46 | . 0.4094 0.4323 0.4454 0.0092 0.0079 -   |
| 0.0332 | 1   | .   |                         |                                          |
| 3677   | CD1 | CD1 | . LEU LEU LEU B B 46 46 | . 0.3946 0.4040 0.4924 -0.0360 -0.0382 - |
| 0.0654 | 1   | .   |                         |                                          |
| 3678   | CD2 | CD2 | . LEU LEU LEU B B 46 46 | . 0.4780 0.4496 0.4451 0.0060 0.0221 -   |
| 0.0834 | 1   | .   |                         |                                          |
| 3679   | C   | C   | . LEU LEU LEU B B 46 46 | . 0.3759 0.3951 0.3842 -0.0020 -0.0033 - |
| 0.0133 | 1   | .   |                         |                                          |
| 3680   | O   | O   | . LEU LEU LEU B B 46 46 | . 0.3477 0.3971 0.3421 -0.0100 -0.0027 - |
| 0.0167 | 1   | .   |                         |                                          |
| 3681   | N   | N   | . GLU GLU GLU B B 47 47 | . 0.3618 0.3777 0.3809 0.0215 0.0011 -   |
| 0.0092 | 1   | .   |                         |                                          |
| 3682   | CA  | CA  | . GLU GLU GLU B B 47 47 | . 0.3560 0.3796 0.3771 0.0179 -0.0036 -  |
| 0.0104 | 1   | .   |                         |                                          |
| 3683   | CB  | CB  | . GLU GLU GLU B B 47 47 | . 0.3756 0.3723 0.3902 0.0159 -0.0114 -  |
| 0.0229 | 1   | .   |                         |                                          |
| 3684   | CG  | CG  | . GLU GLU GLU B B 47 47 | . 0.3863 0.3781 0.4222 0.0089 -0.0056    |
| 0.0188 | 1   | .   |                         |                                          |
| 3685   | CD  | CD  | . GLU GLU GLU B B 47 47 | . 0.4158 0.4222 0.5250 -0.0114 -0.0241   |
| 0.0108 | 1   | .   |                         |                                          |
| 3686   | OE1 | OE1 | . GLU GLU GLU B B 47 47 | . 0.4276 0.4553 0.5287 -0.0310 -0.0224 - |
| 0.0136 | 1   | .   |                         |                                          |
| 3687   | OE2 | OE2 | . GLU GLU GLU B B 47 47 | . 0.4493 0.3165 0.5854 -0.0334 -0.0515   |
| 0.0330 | 1   | .   |                         |                                          |
| 3688   | C   | C   | . GLU GLU GLU B B 47 47 | . 0.3543 0.3686 0.3826 0.0123 0.0000 -   |
| 0.0086 | 1   | .   |                         |                                          |
| 3689   | O   | O   | . GLU GLU GLU B B 47 47 | . 0.3562 0.3765 0.4039 0.0092 0.0210 -   |
| 0.0127 | 1   | .   |                         |                                          |
| 3690   | N   | N   | . LEU LEU LEU B B 48 48 | . 0.3338 0.3645 0.3614 0.0136 -0.0012 -  |
| 0.0036 | 1   | .   |                         |                                          |
| 3691   | CA  | CA  | . LEU LEU LEU B B 48 48 | . 0.3429 0.3612 0.3618 0.0103 0.0082     |
| 0.0040 | 1   | .   |                         |                                          |
| 3692   | CB  | CB  | . LEU LEU LEU B B 48 48 | . 0.3587 0.3636 0.3804 0.0135 0.0227 -   |
| 0.0014 | 1   | .   |                         |                                          |
| 3693   | CG  | CG  | . LEU LEU LEU B B 48 48 | . 0.3544 0.3481 0.3567 -0.0163 0.0332    |
| 0.0091 | 1   | .   |                         |                                          |
| 3694   | CD1 | CD1 | . LEU LEU LEU B B 48 48 | . 0.3572 0.3691 0.4035 -0.0292 0.0854    |
| 0.0240 | 1   | .   |                         |                                          |
| 3695   | CD2 | CD2 | . LEU LEU LEU B B 48 48 | . 0.3291 0.2923 0.3297 -0.0245 0.0275    |
| 0.0441 | 1   | .   |                         |                                          |
| 3696   | C   | C   | . LEU LEU LEU B B 48 48 | . 0.3711 0.3776 0.3632 0.0076 0.0141     |
| 0.0000 | 1   | .   |                         |                                          |
| 3697   | O   | O   | . LEU LEU LEU B B 48 48 | . 0.3466 0.3987 0.3297 0.0082 0.0237     |
| 0.0041 | 1   | .   |                         |                                          |
| 3698   | N   | N   | . ARG ARG ARG B B 49 49 | . 0.3754 0.3751 0.3676 -0.0029 0.0065 -  |
| 0.0007 | 1   | .   |                         |                                          |
| 3699   | CA  | CA  | . ARG ARG ARG B B 49 49 | . 0.4089 0.3997 0.3934 0.0126 0.0113 -   |
| 0.0004 | 1   | .   |                         |                                          |
| 3700   | CB  | CB  | . ARG ARG ARG B B 49 49 | . 0.4066 0.4033 0.3859 0.0090 0.0267 -   |
| 0.0050 | 1   | .   |                         |                                          |
| 3701   | CG  | CG  | . ARG ARG ARG B B 49 49 | . 0.3986 0.3991 0.4150 0.0191 0.0013 -   |
| 0.0242 | 1   | .   |                         |                                          |
| 3702   | CD  | CD  | . ARG ARG ARG B B 49 49 | . 0.4367 0.3691 0.3403 -0.0019 -0.0195   |
| 0.0003 | 1   | .   |                         |                                          |

|        |     |     |                           |        |        |        |         |         |   |
|--------|-----|-----|---------------------------|--------|--------|--------|---------|---------|---|
| 3703   | NE  | NE  | . ARG ARG ARG B B 49 49 . | 0.4099 | 0.3924 | 0.3947 | 0.0231  | 0.0118  |   |
| 0.0193 | 1   | .   |                           |        |        |        |         |         |   |
| 3704   | CZ  | CZ  | . ARG ARG ARG B B 49 49 . | 0.3954 | 0.3901 | 0.3462 | 0.0597  | 0.0191  |   |
| 0.0092 | 1   | .   |                           |        |        |        |         |         |   |
| 3705   | NH1 | NH1 | . ARG ARG ARG B B 49 49 . | 0.3394 | 0.3466 | 0.2666 | 0.0486  | 0.0139  | - |
| 0.0693 | 1   | .   |                           |        |        |        |         |         |   |
| 3706   | NH2 | NH2 | . ARG ARG ARG B B 49 49 . | 0.4656 | 0.4140 | 0.2448 | 0.0202  | -0.0208 |   |
| 0.0049 | 1   | .   |                           |        |        |        |         |         |   |
| 3707   | C   | C   | . ARG ARG ARG B B 49 49 . | 0.4254 | 0.3988 | 0.4032 | 0.0206  | 0.0180  | - |
| 0.0018 | 1   | .   |                           |        |        |        |         |         |   |
| 3708   | O   | O   | . ARG ARG ARG B B 49 49 . | 0.4380 | 0.3898 | 0.4013 | 0.0261  | 0.0244  |   |
| 0.0021 | 1   | .   |                           |        |        |        |         |         |   |
| 3709   | N   | N   | . ASP ASP ASP B B 50 50 . | 0.4469 | 0.4114 | 0.4070 | 0.0187  | 0.0231  |   |
| 0.0007 | 1   | .   |                           |        |        |        |         |         |   |
| 3710   | CA  | CA  | . ASP ASP ASP B B 50 50 . | 0.4609 | 0.4455 | 0.4269 | 0.0100  | 0.0227  |   |
| 0.0049 | 1   | .   |                           |        |        |        |         |         |   |
| 3711   | CB  | CB  | . ASP ASP ASP B B 50 50 . | 0.4723 | 0.4449 | 0.4233 | 0.0148  | 0.0312  |   |
| 0.0012 | 1   | .   |                           |        |        |        |         |         |   |
| 3712   | CG  | CG  | . ASP ASP ASP B B 50 50 . | 0.4623 | 0.4722 | 0.4330 | 0.0267  | 0.0424  |   |
| 0.0035 | 1   | .   |                           |        |        |        |         |         |   |
| 3713   | OD1 | OD1 | . ASP ASP ASP B B 50 50 . | 0.4332 | 0.4524 | 0.4224 | 0.0739  | 0.0450  | - |
| 0.0397 | 1   | .   |                           |        |        |        |         |         |   |
| 3714   | OD2 | OD2 | . ASP ASP ASP B B 50 50 . | 0.5121 | 0.5240 | 0.4968 | 0.0390  | 0.0310  |   |
| 0.0525 | 1   | .   |                           |        |        |        |         |         |   |
| 3715   | C   | C   | . ASP ASP ASP B B 50 50 . | 0.4660 | 0.4595 | 0.4408 | 0.0100  | 0.0174  |   |
| 0.0078 | 1   | .   |                           |        |        |        |         |         |   |
| 3716   | O   | O   | . ASP ASP ASP B B 50 50 . | 0.4542 | 0.4447 | 0.4284 | 0.0187  | 0.0334  |   |
| 0.0024 | 1   | .   |                           |        |        |        |         |         |   |
| 3717   | N   | N   | . GLY GLY GLY B B 51 51 . | 0.4755 | 0.4927 | 0.4550 | 0.0051  | 0.0157  |   |
| 0.0155 | 1   | .   |                           |        |        |        |         |         |   |
| 3718   | CA  | CA  | . GLY GLY GLY B B 51 51 . | 0.4803 | 0.4892 | 0.4846 | -0.0025 | 0.0053  |   |
| 0.0062 | 1   | .   |                           |        |        |        |         |         |   |
| 3719   | C   | C   | . GLY GLY GLY B B 51 51 . | 0.5048 | 0.5113 | 0.5153 | 0.0022  | 0.0044  |   |
| 0.0062 | 1   | .   |                           |        |        |        |         |         |   |
| 3720   | O   | O   | . GLY GLY GLY B B 51 51 . | 0.5051 | 0.5170 | 0.5360 | -0.0016 | -0.0024 | - |
| 0.0006 | 1   | .   |                           |        |        |        |         |         |   |
| 3721   | N   | N   | . ASP ASP ASP B B 52 52 . | 0.5231 | 0.5231 | 0.5285 | 0.0002  | 0.0007  |   |
| 0.0065 | 1   | .   |                           |        |        |        |         |         |   |
| 3722   | CA  | CA  | . ASP ASP ASP B B 52 52 . | 0.5348 | 0.5315 | 0.5300 | 0.0013  | -0.0009 | - |
| 0.0018 | 1   | .   |                           |        |        |        |         |         |   |
| 3723   | CB  | CB  | . ASP ASP ASP B B 52 52 . | 0.5356 | 0.5155 | 0.5274 | -0.0001 | -0.0015 |   |
| 0.0024 | 1   | .   |                           |        |        |        |         |         |   |
| 3724   | CG  | CG  | . ASP ASP ASP B B 52 52 . | 0.5328 | 0.5140 | 0.5372 | -0.0172 | -0.0010 | - |
| 0.0183 | 1   | .   |                           |        |        |        |         |         |   |
| 3725   | OD1 | OD1 | . ASP ASP ASP B B 52 52 . | 0.5469 | 0.4270 | 0.5783 | -0.0186 | -0.0014 | - |
| 0.0289 | 1   | .   |                           |        |        |        |         |         |   |
| 3726   | OD2 | OD2 | . ASP ASP ASP B B 52 52 . | 0.4954 | 0.5179 | 0.4999 | -0.0440 | -0.0046 | - |
| 0.0342 | 1   | .   |                           |        |        |        |         |         |   |
| 3727   | C   | C   | . ASP ASP ASP B B 52 52 . | 0.5476 | 0.5401 | 0.5415 | 0.0006  | -0.0059 |   |
| 0.0003 | 1   | .   |                           |        |        |        |         |         |   |
| 3728   | O   | O   | . ASP ASP ASP B B 52 52 . | 0.5437 | 0.5609 | 0.5489 | 0.0042  | -0.0131 |   |
| 0.0091 | 1   | .   |                           |        |        |        |         |         |   |
| 3729   | N   | N   | . LYS LYS LYS B B 53 53 . | 0.5628 | 0.5537 | 0.5562 | 0.0018  | -0.0039 | - |
| 0.0038 | 1   | .   |                           |        |        |        |         |         |   |
| 3730   | CA  | CA  | . LYS LYS LYS B B 53 53 . | 0.5862 | 0.5767 | 0.5739 | -0.0003 | -0.0077 | - |
| 0.0034 | 1   | .   |                           |        |        |        |         |         |   |
| 3731   | CB  | CB  | . LYS LYS LYS B B 53 53 . | 0.5904 | 0.5843 | 0.5858 | -0.0019 | -0.0070 |   |
| 0.0049 | 1   | .   |                           |        |        |        |         |         |   |
| 3732   | CG  | CG  | . LYS LYS LYS B B 53 53 . | 0.6484 | 0.6542 | 0.6234 | 0.0000  | -0.0060 |   |
| 0.0244 | 1   | .   |                           |        |        |        |         |         |   |





|        |     |     |                           |        |        |        |         |         |   |
|--------|-----|-----|---------------------------|--------|--------|--------|---------|---------|---|
| 3793   | C   | C   | . GLY GLY GLY B B 60 60 . | 0.3393 | 0.3478 | 0.3326 | 0.0121  | 0.0095  |   |
| 0.0071 | 1   | .   |                           |        |        |        |         |         |   |
| 3794   | O   | O   | . GLY GLY GLY B B 60 60 . | 0.3197 | 0.3416 | 0.3228 | 0.0254  | 0.0079  |   |
| 0.0174 | 1   | .   |                           |        |        |        |         |         |   |
| 3795   | N   | N   | . VAL VAL VAL B B 61 61 . | 0.3592 | 0.3466 | 0.3341 | 0.0071  | 0.0030  |   |
| 0.0044 | 1   | .   |                           |        |        |        |         |         |   |
| 3796   | CA  | CA  | . VAL VAL VAL B B 61 61 . | 0.3648 | 0.3481 | 0.3363 | 0.0187  | 0.0001  | - |
| 0.0046 | 1   | .   |                           |        |        |        |         |         |   |
| 3797   | CB  | CB  | . VAL VAL VAL B B 61 61 . | 0.3924 | 0.3671 | 0.3614 | 0.0094  | 0.0093  |   |
| 0.0007 | 1   | .   |                           |        |        |        |         |         |   |
| 3798   | CG1 | CG1 | . VAL VAL VAL B B 61 61 . | 0.3475 | 0.3604 | 0.3026 | 0.0122  | 0.0055  |   |
| 0.0052 | 1   | .   |                           |        |        |        |         |         |   |
| 3799   | CG2 | CG2 | . VAL VAL VAL B B 61 61 . | 0.4262 | 0.3471 | 0.3443 | 0.0354  | 0.0067  | - |
| 0.0082 | 1   | .   |                           |        |        |        |         |         |   |
| 3800   | C   | C   | . VAL VAL VAL B B 61 61 . | 0.3699 | 0.3454 | 0.3467 | 0.0146  | -0.0051 | - |
| 0.0043 | 1   | .   |                           |        |        |        |         |         |   |
| 3801   | O   | O   | . VAL VAL VAL B B 61 61 . | 0.3584 | 0.3176 | 0.3503 | 0.0238  | -0.0040 | - |
| 0.0141 | 1   | .   |                           |        |        |        |         |         |   |
| 3802   | N   | N   | . LEU LEU LEU B B 62 62 . | 0.3852 | 0.3850 | 0.3702 | 0.0166  | -0.0018 | - |
| 0.0017 | 1   | .   |                           |        |        |        |         |         |   |
| 3803   | CA  | CA  | . LEU LEU LEU B B 62 62 . | 0.3792 | 0.3849 | 0.3707 | 0.0144  | 0.0045  | - |
| 0.0006 | 1   | .   |                           |        |        |        |         |         |   |
| 3804   | CB  | CB  | . LEU LEU LEU B B 62 62 . | 0.3952 | 0.4036 | 0.3924 | 0.0187  | 0.0007  | - |
| 0.0054 | 1   | .   |                           |        |        |        |         |         |   |
| 3805   | CG  | CG  | . LEU LEU LEU B B 62 62 . | 0.4414 | 0.4280 | 0.4125 | 0.0134  | 0.0050  |   |
| 0.0011 | 1   | .   |                           |        |        |        |         |         |   |
| 3806   | CD1 | CD1 | . LEU LEU LEU B B 62 62 . | 0.4985 | 0.4518 | 0.4751 | -0.0113 | 0.0303  | - |
| 0.0210 | 1   | .   |                           |        |        |        |         |         |   |
| 3807   | CD2 | CD2 | . LEU LEU LEU B B 62 62 . | 0.4143 | 0.4729 | 0.4404 | -0.0118 | 0.0634  |   |
| 0.0232 | 1   | .   |                           |        |        |        |         |         |   |
| 3808   | C   | C   | . LEU LEU LEU B B 62 62 . | 0.3709 | 0.3702 | 0.3578 | 0.0113  | 0.0033  | - |
| 0.0006 | 1   | .   |                           |        |        |        |         |         |   |
| 3809   | O   | O   | . LEU LEU LEU B B 62 62 . | 0.3406 | 0.3451 | 0.3242 | 0.0124  | 0.0112  |   |
| 0.0111 | 1   | .   |                           |        |        |        |         |         |   |
| 3810   | N   | N   | . LYS LYS LYS B B 63 63 . | 0.3684 | 0.3709 | 0.3534 | 0.0146  | 0.0200  |   |
| 0.0017 | 1   | .   |                           |        |        |        |         |         |   |
| 3811   | CA  | CA  | . LYS LYS LYS B B 63 63 . | 0.3607 | 0.3861 | 0.3775 | 0.0089  | 0.0145  |   |
| 0.0006 | 1   | .   |                           |        |        |        |         |         |   |
| 3812   | CB  | CB  | . LYS LYS LYS B B 63 63 . | 0.3634 | 0.3808 | 0.3790 | 0.0038  | 0.0154  | - |
| 0.0092 | 1   | .   |                           |        |        |        |         |         |   |
| 3813   | CG  | CG  | . LYS LYS LYS B B 63 63 . | 0.4524 | 0.4322 | 0.4423 | -0.0243 | 0.0161  | - |
| 0.0079 | 1   | .   |                           |        |        |        |         |         |   |
| 3814   | CD  | CD  | . LYS LYS LYS B B 63 63 . | 0.4624 | 0.4708 | 0.4609 | -0.0806 | 0.0570  | - |
| 0.0056 | 1   | .   |                           |        |        |        |         |         |   |
| 3815   | CE  | CE  | . LYS LYS LYS B B 63 63 . | 0.4615 | 0.4473 | 0.4717 | -0.0713 | 0.0451  |   |
| 0.0211 | 1   | .   |                           |        |        |        |         |         |   |
| 3816   | NZ  | NZ  | . LYS LYS LYS B B 63 63 . | 0.4641 | 0.4192 | 0.4663 | -0.0939 | 0.0866  |   |
| 0.0058 | 1   | .   |                           |        |        |        |         |         |   |
| 3817   | C   | C   | . LYS LYS LYS B B 63 63 . | 0.3595 | 0.3787 | 0.3861 | 0.0159  | 0.0149  | - |
| 0.0013 | 1   | .   |                           |        |        |        |         |         |   |
| 3818   | O   | O   | . LYS LYS LYS B B 63 63 . | 0.3141 | 0.3881 | 0.4143 | 0.0346  | 0.0327  |   |
| 0.0085 | 1   | .   |                           |        |        |        |         |         |   |
| 3819   | N   | N   | . ALA ALA ALA B B 64 64 . | 0.3353 | 0.3879 | 0.3807 | 0.0239  | 0.0193  | - |
| 0.0059 | 1   | .   |                           |        |        |        |         |         |   |
| 3820   | CA  | CA  | . ALA ALA ALA B B 64 64 . | 0.3532 | 0.3804 | 0.3796 | 0.0189  | 0.0126  | - |
| 0.0148 | 1   | .   |                           |        |        |        |         |         |   |
| 3821   | CB  | CB  | . ALA ALA ALA B B 64 64 . | 0.3769 | 0.3758 | 0.3780 | 0.0182  | -0.0010 | - |
| 0.0284 | 1   | .   |                           |        |        |        |         |         |   |
| 3822   | C   | C   | . ALA ALA ALA B B 64 64 . | 0.3676 | 0.3818 | 0.3825 | 0.0240  | 0.0093  | - |
| 0.0123 | 1   | .   |                           |        |        |        |         |         |   |

|        |     |     |                           |        |        |        |         |         |   |
|--------|-----|-----|---------------------------|--------|--------|--------|---------|---------|---|
| 3823   | O   | O   | . ALA ALA ALA B B 64 64 . | 0.3674 | 0.3905 | 0.3770 | 0.0344  | 0.0084  | - |
| 0.0229 | 1   | .   |                           |        |        |        |         |         |   |
| 3824   | N   | N   | . VAL VAL VAL B B 65 65 . | 0.3529 | 0.3912 | 0.3971 | 0.0354  | 0.0176  | - |
| 0.0077 | 1   | .   |                           |        |        |        |         |         |   |
| 3825   | CA  | CA  | . VAL VAL VAL B B 65 65 . | 0.3481 | 0.4007 | 0.4043 | 0.0411  | 0.0193  |   |
| 0.0009 | 1   | .   |                           |        |        |        |         |         |   |
| 3826   | CB  | CB  | . VAL VAL VAL B B 65 65 . | 0.3598 | 0.3981 | 0.3953 | 0.0463  | 0.0237  |   |
| 0.0010 | 1   | .   |                           |        |        |        |         |         |   |
| 3827   | CG1 | CG1 | . VAL VAL VAL B B 65 65 . | 0.2665 | 0.3465 | 0.4062 | 0.0609  | 0.0380  | - |
| 0.0192 | 1   | .   |                           |        |        |        |         |         |   |
| 3828   | CG2 | CG2 | . VAL VAL VAL B B 65 65 . | 0.3076 | 0.4074 | 0.3945 | 0.0730  | 0.0118  |   |
| 0.0345 | 1   | .   |                           |        |        |        |         |         |   |
| 3829   | C   | C   | . VAL VAL VAL B B 65 65 . | 0.3699 | 0.4165 | 0.4151 | 0.0277  | 0.0212  |   |
| 0.0017 | 1   | .   |                           |        |        |        |         |         |   |
| 3830   | O   | O   | . VAL VAL VAL B B 65 65 . | 0.3308 | 0.4219 | 0.4112 | 0.0372  | 0.0244  |   |
| 0.0045 | 1   | .   |                           |        |        |        |         |         |   |
| 3831   | N   | N   | . ASP ASP ASP B B 66 66 . | 0.3939 | 0.4218 | 0.4225 | 0.0298  | 0.0155  |   |
| 0.0000 | 1   | .   |                           |        |        |        |         |         |   |
| 3832   | CA  | CA  | . ASP ASP ASP B B 66 66 . | 0.4278 | 0.4438 | 0.4495 | 0.0204  | 0.0146  |   |
| 0.0059 | 1   | .   |                           |        |        |        |         |         |   |
| 3833   | CB  | CB  | . ASP ASP ASP B B 66 66 . | 0.4444 | 0.4247 | 0.4608 | 0.0193  | 0.0191  |   |
| 0.0014 | 1   | .   |                           |        |        |        |         |         |   |
| 3834   | CG  | CG  | . ASP ASP ASP B B 66 66 . | 0.5066 | 0.4828 | 0.5263 | 0.0104  | 0.0456  |   |
| 0.0058 | 1   | .   |                           |        |        |        |         |         |   |
| 3835   | OD1 | OD1 | . ASP ASP ASP B B 66 66 . | 0.5572 | 0.5052 | 0.5814 | 0.0264  | 0.0328  | - |
| 0.0127 | 1   | .   |                           |        |        |        |         |         |   |
| 3836   | OD2 | OD2 | . ASP ASP ASP B B 66 66 . | 0.5596 | 0.5213 | 0.5372 | -0.0157 | 0.0907  |   |
| 0.0188 | 1   | .   |                           |        |        |        |         |         |   |
| 3837   | C   | C   | . ASP ASP ASP B B 66 66 . | 0.4156 | 0.4396 | 0.4477 | 0.0197  | 0.0083  |   |
| 0.0124 | 1   | .   |                           |        |        |        |         |         |   |
| 3838   | O   | O   | . ASP ASP ASP B B 66 66 . | 0.4153 | 0.4498 | 0.4533 | 0.0151  | 0.0132  |   |
| 0.0200 | 1   | .   |                           |        |        |        |         |         |   |
| 3839   | N   | N   | . HIS HIS HIS B B 67 67 . | 0.4154 | 0.4517 | 0.4479 | 0.0197  | 0.0070  |   |
| 0.0157 | 1   | .   |                           |        |        |        |         |         |   |
| 3840   | CA  | CA  | . HIS HIS HIS B B 67 67 . | 0.4269 | 0.4618 | 0.4557 | 0.0100  | 0.0071  |   |
| 0.0148 | 1   | .   |                           |        |        |        |         |         |   |
| 3841   | CB  | CB  | . HIS HIS HIS B B 67 67 . | 0.4307 | 0.4660 | 0.4628 | 0.0077  | 0.0141  |   |
| 0.0135 | 1   | .   |                           |        |        |        |         |         |   |
| 3842   | CG  | CG  | . HIS HIS HIS B B 67 67 . | 0.4826 | 0.4825 | 0.4988 | 0.0065  | -0.0018 |   |
| 0.0142 | 1   | .   |                           |        |        |        |         |         |   |
| 3843   | ND1 | ND1 | . HIS HIS HIS B B 67 67 . | 0.4877 | 0.5140 | 0.4723 | 0.0188  | 0.0312  | - |
| 0.0029 | 1   | .   |                           |        |        |        |         |         |   |
| 3844   | CE1 | CE1 | . HIS HIS HIS B B 67 67 . | 0.5021 | 0.4818 | 0.5104 | 0.0076  | 0.0043  | - |
| 0.0097 | 1   | .   |                           |        |        |        |         |         |   |
| 3845   | NE2 | NE2 | . HIS HIS HIS B B 67 67 . | 0.4825 | 0.5034 | 0.5039 | -0.0152 | -0.0012 |   |
| 0.0139 | 1   | .   |                           |        |        |        |         |         |   |
| 3846   | CD2 | CD2 | . HIS HIS HIS B B 67 67 . | 0.4968 | 0.5032 | 0.5228 | -0.0059 | -0.0024 |   |
| 0.0155 | 1   | .   |                           |        |        |        |         |         |   |
| 3847   | C   | C   | . HIS HIS HIS B B 67 67 . | 0.4217 | 0.4562 | 0.4548 | 0.0152  | 0.0113  |   |
| 0.0201 | 1   | .   |                           |        |        |        |         |         |   |
| 3848   | O   | O   | . HIS HIS HIS B B 67 67 . | 0.3570 | 0.4883 | 0.4738 | 0.0323  | 0.0343  |   |
| 0.0379 | 1   | .   |                           |        |        |        |         |         |   |
| 3849   | N   | N   | . ILE ILE ILE B B 68 68 . | 0.3952 | 0.4500 | 0.4291 | 0.0211  | 0.0188  |   |
| 0.0172 | 1   | .   |                           |        |        |        |         |         |   |
| 3850   | CA  | CA  | . ILE ILE ILE B B 68 68 . | 0.4003 | 0.4271 | 0.4224 | 0.0108  | 0.0153  |   |
| 0.0034 | 1   | .   |                           |        |        |        |         |         |   |
| 3851   | CB  | CB  | . ILE ILE ILE B B 68 68 . | 0.3975 | 0.4197 | 0.4092 | 0.0026  | 0.0172  |   |
| 0.0079 | 1   | .   |                           |        |        |        |         |         |   |
| 3852   | CG1 | CG1 | . ILE ILE ILE B B 68 68 . | 0.4166 | 0.4283 | 0.4244 | 0.0127  | 0.0109  | - |
| 0.0188 | 1   | .   |                           |        |        |        |         |         |   |

|        |     |     |                         |                                         |
|--------|-----|-----|-------------------------|-----------------------------------------|
| 3853   | CD1 | CD1 | . ILE ILE ILE B B 68 68 | . 0.2884 0.4412 0.3280 -0.0069 -0.0541  |
| 0.0001 | 1   | .   |                         |                                         |
| 3854   | CG2 | CG2 | . ILE ILE ILE B B 68 68 | . 0.3270 0.3954 0.3540 0.0032 0.0011 -  |
| 0.0234 | 1   | .   |                         |                                         |
| 3855   | C   | C   | . ILE ILE ILE B B 68 68 | . 0.4178 0.4327 0.4157 0.0154 0.0168    |
| 0.0088 | 1   | .   |                         |                                         |
| 3856   | O   | O   | . ILE ILE ILE B B 68 68 | . 0.4144 0.4518 0.3934 0.0139 0.0176    |
| 0.0220 | 1   | .   |                         |                                         |
| 3857   | N   | N   | . ASN ASN ASN B B 69 69 | . 0.4116 0.4350 0.4343 0.0303 0.0076    |
| 0.0055 | 1   | .   |                         |                                         |
| 3858   | CA  | CA  | . ASN ASN ASN B B 69 69 | . 0.4408 0.4604 0.4674 0.0194 0.0089    |
| 0.0062 | 1   | .   |                         |                                         |
| 3859   | CB  | CB  | . ASN ASN ASN B B 69 69 | . 0.4323 0.4434 0.4473 0.0173 0.0137    |
| 0.0016 | 1   | .   |                         |                                         |
| 3860   | CG  | CG  | . ASN ASN ASN B B 69 69 | . 0.4410 0.4446 0.4584 0.0003 0.0065    |
| 0.0013 | 1   | .   |                         |                                         |
| 3861   | OD1 | OD1 | . ASN ASN ASN B B 69 69 | . 0.4224 0.3977 0.4758 -0.0549 0.0987   |
| 0.0295 | 1   | .   |                         |                                         |
| 3862   | ND2 | ND2 | . ASN ASN ASN B B 69 69 | . 0.4168 0.4169 0.4622 0.0160 -0.0092 - |
| 0.0517 | 1   | .   |                         |                                         |
| 3863   | C   | C   | . ASN ASN ASN B B 69 69 | . 0.4560 0.4785 0.4955 0.0208 0.0151    |
| 0.0016 | 1   | .   |                         |                                         |
| 3864   | O   | O   | . ASN ASN ASN B B 69 69 | . 0.4596 0.4987 0.5145 0.0288 0.0062 -  |
| 0.0006 | 1   | .   |                         |                                         |
| 3865   | N   | N   | . SER SER SER B B 70 70 | . 0.4828 0.4958 0.5173 0.0258 0.0089 -  |
| 0.0030 | 1   | .   |                         |                                         |
| 3866   | CA  | CA  | . SER SER SER B B 70 70 | . 0.5029 0.5129 0.5299 0.0197 0.0001 -  |
| 0.0034 | 1   | .   |                         |                                         |
| 3867   | CB  | CB  | . SER SER SER B B 70 70 | . 0.4985 0.4967 0.5258 0.0144 -0.0072 - |
| 0.0039 | 1   | .   |                         |                                         |
| 3868   | OG  | OG  | . SER SER SER B B 70 70 | . 0.5319 0.5281 0.5368 0.0204 -0.0043 - |
| 0.0018 | 1   | .   |                         |                                         |
| 3869   | C   | C   | . SER SER SER B B 70 70 | . 0.5044 0.5188 0.5313 0.0160 0.0000 -  |
| 0.0065 | 1   | .   |                         |                                         |
| 3870   | O   | O   | . SER SER SER B B 70 70 | . 0.5027 0.5259 0.5558 0.0210 0.0069 -  |
| 0.0169 | 1   | .   |                         |                                         |
| 3871   | N   | N   | . THR THR THR B B 71 71 | . 0.4903 0.5098 0.5170 0.0175 0.0096    |
| 0.0003 | 1   | .   |                         |                                         |
| 3872   | CA  | CA  | . THR THR THR B B 71 71 | . 0.4845 0.5076 0.5020 0.0121 0.0030    |
| 0.0059 | 1   | .   |                         |                                         |
| 3873   | CB  | CB  | . THR THR THR B B 71 71 | . 0.5005 0.5195 0.5066 0.0097 -0.0039 - |
| 0.0002 | 1   | .   |                         |                                         |
| 3874   | OG1 | OG1 | . THR THR THR B B 71 71 | . 0.5418 0.5230 0.5204 0.0417 -0.0019 - |
| 0.0298 | 1   | .   |                         |                                         |
| 3875   | CG2 | CG2 | . THR THR THR B B 71 71 | . 0.4684 0.5255 0.5084 0.0050 0.0068    |
| 0.0099 | 1   | .   |                         |                                         |
| 3876   | C   | C   | . THR THR THR B B 71 71 | . 0.4668 0.4958 0.4917 0.0166 0.0095    |
| 0.0121 | 1   | .   |                         |                                         |
| 3877   | O   | O   | . THR THR THR B B 71 71 | . 0.4369 0.5030 0.4834 0.0398 0.0146    |
| 0.0259 | 1   | .   |                         |                                         |
| 3878   | N   | N   | . ILE ILE ILE B B 72 72 | . 0.4370 0.4952 0.4764 0.0065 0.0120    |
| 0.0200 | 1   | .   |                         |                                         |
| 3879   | CA  | CA  | . ILE ILE ILE B B 72 72 | . 0.4181 0.4774 0.4684 0.0094 0.0074    |
| 0.0074 | 1   | .   |                         |                                         |
| 3880   | CB  | CB  | . ILE ILE ILE B B 72 72 | . 0.4401 0.4814 0.4753 0.0096 0.0050    |
| 0.0022 | 1   | .   |                         |                                         |
| 3881   | CG1 | CG1 | . ILE ILE ILE B B 72 72 | . 0.4147 0.4964 0.4663 0.0173 0.0180    |
| 0.0189 | 1   | .   |                         |                                         |
| 3882   | CD1 | CD1 | . ILE ILE ILE B B 72 72 | . 0.5232 0.4659 0.4808 0.0346 0.0440 -  |
| 0.0200 | 1   | .   |                         |                                         |





|        |     |     |                         |                                        |
|--------|-----|-----|-------------------------|----------------------------------------|
| 3913   | CB  | CB  | . ILE ILE ILE B B 77 77 | . 0.4441 0.4986 0.5144 0.0239 0.0072 - |
| 0.0007 | 1   | .   |                         |                                        |
| 3914   | CG1 | CG1 | . ILE ILE ILE B B 77 77 | . 0.4159 0.5232 0.4929 0.0107 0.0138 - |
| 0.0125 | 1   | .   |                         |                                        |
| 3915   | CD1 | CD1 | . ILE ILE ILE B B 77 77 | . 0.2607 0.4879 0.4744 0.0208 0.0362 - |
| 0.0114 | 1   | .   |                         |                                        |
| 3916   | CG2 | CG2 | . ILE ILE ILE B B 77 77 | . 0.3947 0.5056 0.4798 0.0565 0.0491 - |
| 0.0216 | 1   | .   |                         |                                        |
| 3917   | C   | C   | . ILE ILE ILE B B 77 77 | . 0.4707 0.5170 0.5382 0.0152 0.0083 - |
| 0.0070 | 1   | .   |                         |                                        |
| 3918   | O   | O   | . ILE ILE ILE B B 77 77 | . 0.4695 0.5421 0.5707 0.0142 0.0140 - |
| 0.0091 | 1   | .   |                         |                                        |
| 3919   | N   | N   | . SER SER SER B B 78 78 | . 0.4897 0.5201 0.5418 0.0197 0.0045 - |
| 0.0029 | 1   | .   |                         |                                        |
| 3920   | CA  | CA  | . SER SER SER B B 78 78 | . 0.5083 0.5329 0.5390 0.0191 0.0063 - |
| 0.0037 | 1   | .   |                         |                                        |
| 3921   | CB  | CB  | . SER SER SER B B 78 78 | . 0.4987 0.5344 0.5407 0.0254 0.0072 - |
| 0.0129 | 1   | .   |                         |                                        |
| 3922   | OG  | OG  | . SER SER SER B B 78 78 | . 0.5285 0.6028 0.5752 0.0453 0.0279 - |
| 0.0058 | 1   | .   |                         |                                        |
| 3923   | C   | C   | . SER SER SER B B 78 78 | . 0.5165 0.5259 0.5360 0.0161 0.0059   |
| 0.0014 | 1   | .   |                         |                                        |
| 3924   | O   | O   | . SER SER SER B B 78 78 | . 0.5238 0.5172 0.5346 0.0225 0.0072   |
| 0.0029 | 1   | .   |                         |                                        |
| 3925   | N   | N   | . SER SER SER B B 79 79 | . 0.5231 0.5282 0.5305 0.0193 0.0145   |
| 0.0012 | 1   | .   |                         |                                        |
| 3926   | CA  | CA  | . SER SER SER B B 79 79 | . 0.5141 0.5325 0.5345 0.0153 0.0173   |
| 0.0039 | 1   | .   |                         |                                        |
| 3927   | CB  | CB  | . SER SER SER B B 79 79 | . 0.5005 0.5300 0.5369 0.0162 0.0244   |
| 0.0013 | 1   | .   |                         |                                        |
| 3928   | OG  | OG  | . SER SER SER B B 79 79 | . 0.4397 0.5307 0.5352 0.0213 0.0512   |
| 0.0266 | 1   | .   |                         |                                        |
| 3929   | C   | C   | . SER SER SER B B 79 79 | . 0.5220 0.5428 0.5434 0.0124 0.0148   |
| 0.0012 | 1   | .   |                         |                                        |
| 3930   | O   | O   | . SER SER SER B B 79 79 | . 0.5382 0.5552 0.5520 0.0266 0.0111   |
| 0.0001 | 1   | .   |                         |                                        |
| 3931   | N   | N   | . GLY GLY GLY B B 80 80 | . 0.5234 0.5505 0.5477 0.0081 0.0162   |
| 0.0080 | 1   | .   |                         |                                        |
| 3932   | CA  | CA  | . GLY GLY GLY B B 80 80 | . 0.5214 0.5403 0.5567 -0.0012 0.0159  |
| 0.0089 | 1   | .   |                         |                                        |
| 3933   | C   | C   | . GLY GLY GLY B B 80 80 | . 0.5277 0.5517 0.5677 -0.0013 0.0085  |
| 0.0134 | 1   | .   |                         |                                        |
| 3934   | O   | O   | . GLY GLY GLY B B 80 80 | . 0.5264 0.5759 0.5894 -0.0158 0.0097  |
| 0.0181 | 1   | .   |                         |                                        |
| 3935   | N   | N   | . LEU LEU LEU B B 81 81 | . 0.5291 0.5498 0.5707 0.0101 -0.0038  |
| 0.0117 | 1   | .   |                         |                                        |
| 3936   | CA  | CA  | . LEU LEU LEU B B 81 81 | . 0.5237 0.5515 0.5618 0.0155 -0.0037  |
| 0.0143 | 1   | .   |                         |                                        |
| 3937   | CB  | CB  | . LEU LEU LEU B B 81 81 | . 0.5150 0.5483 0.5718 0.0167 -0.0098  |
| 0.0095 | 1   | .   |                         |                                        |
| 3938   | CG  | CG  | . LEU LEU LEU B B 81 81 | . 0.5273 0.5350 0.5693 0.0105 -0.0217  |
| 0.0191 | 1   | .   |                         |                                        |
| 3939   | CD1 | CD1 | . LEU LEU LEU B B 81 81 | . 0.4705 0.5737 0.5688 0.0068 -0.0424  |
| 0.0131 | 1   | .   |                         |                                        |
| 3940   | CD2 | CD2 | . LEU LEU LEU B B 81 81 | . 0.4920 0.4900 0.5845 0.0374 -0.0336  |
| 0.0396 | 1   | .   |                         |                                        |
| 3941   | C   | C   | . LEU LEU LEU B B 81 81 | . 0.5245 0.5564 0.5663 0.0142 0.0014   |
| 0.0047 | 1   | .   |                         |                                        |
| 3942   | O   | O   | . LEU LEU LEU B B 81 81 | . 0.5102 0.5595 0.5758 0.0329 -0.0061  |
| 0.0101 | 1   | .   |                         |                                        |





|        |     |     |                         |                                         |
|--------|-----|-----|-------------------------|-----------------------------------------|
| 4003   | CD1 | CD1 | . LEU LEU LEU B B 89 89 | . 0.3282 0.3593 0.4687 -0.0208 -0.0034  |
| 0.0093 | 1   | .   |                         |                                         |
| 4004   | CD2 | CD2 | . LEU LEU LEU B B 89 89 | . 0.3829 0.2626 0.4180 0.0385 -0.0154   |
| 0.0203 | 1   | .   |                         |                                         |
| 4005   | C   | C   | . LEU LEU LEU B B 89 89 | . 0.4144 0.4422 0.4345 0.0074 0.0019    |
| 0.0053 | 1   | .   |                         |                                         |
| 4006   | O   | O   | . LEU LEU LEU B B 89 89 | . 0.3807 0.4659 0.4110 0.0197 0.0068    |
| 0.0086 | 1   | .   |                         |                                         |
| 4007   | N   | N   | . ASP ASP ASP B B 90 90 | . 0.4219 0.4407 0.4274 0.0061 0.0006    |
| 0.0075 | 1   | .   |                         |                                         |
| 4008   | CA  | CA  | . ASP ASP ASP B B 90 90 | . 0.4133 0.4560 0.4340 0.0152 -0.0012   |
| 0.0042 | 1   | .   |                         |                                         |
| 4009   | CB  | CB  | . ASP ASP ASP B B 90 90 | . 0.4279 0.4640 0.4353 0.0289 -0.0111   |
| 0.0010 | 1   | .   |                         |                                         |
| 4010   | CG  | CG  | . ASP ASP ASP B B 90 90 | . 0.4193 0.5019 0.4611 0.0342 -0.0119 - |
| 0.0091 | 1   | .   |                         |                                         |
| 4011   | OD1 | OD1 | . ASP ASP ASP B B 90 90 | . 0.3835 0.5601 0.4897 0.0555 -0.0675 - |
| 0.0021 | 1   | .   |                         |                                         |
| 4012   | OD2 | OD2 | . ASP ASP ASP B B 90 90 | . 0.4191 0.4884 0.5411 0.0784 -0.0265 - |
| 0.0181 | 1   | .   |                         |                                         |
| 4013   | C   | C   | . ASP ASP ASP B B 90 90 | . 0.4071 0.4506 0.4392 0.0162 -0.0039   |
| 0.0028 | 1   | .   |                         |                                         |
| 4014   | O   | O   | . ASP ASP ASP B B 90 90 | . 0.3628 0.4530 0.4337 0.0249 -0.0093   |
| 0.0072 | 1   | .   |                         |                                         |
| 4015   | N   | N   | . ASN ASN ASN B B 91 91 | . 0.4240 0.4683 0.4544 0.0123 -0.0065   |
| 0.0011 | 1   | .   |                         |                                         |
| 4016   | CA  | CA  | . ASN ASN ASN B B 91 91 | . 0.4405 0.4642 0.4692 0.0111 -0.0098   |
| 0.0021 | 1   | .   |                         |                                         |
| 4017   | CB  | CB  | . ASN ASN ASN B B 91 91 | . 0.4614 0.4872 0.4925 0.0085 -0.0091   |
| 0.0061 | 1   | .   |                         |                                         |
| 4018   | CG  | CG  | . ASN ASN ASN B B 91 91 | . 0.5506 0.5820 0.5280 -0.0243 -0.0081  |
| 0.0168 | 1   | .   |                         |                                         |
| 4019   | OD1 | OD1 | . ASN ASN ASN B B 91 91 | . 0.6667 0.6149 0.6367 -0.0908 -0.0308  |
| 0.0066 | 1   | .   |                         |                                         |
| 4020   | ND2 | ND2 | . ASN ASN ASN B B 91 91 | . 0.5591 0.6572 0.6029 -0.0325 0.0027   |
| 0.0499 | 1   | .   |                         |                                         |
| 4021   | C   | C   | . ASN ASN ASN B B 91 91 | . 0.4042 0.4591 0.4752 0.0204 -0.0079   |
| 0.0042 | 1   | .   |                         |                                         |
| 4022   | O   | O   | . ASN ASN ASN B B 91 91 | . 0.3785 0.4549 0.4959 0.0531 -0.0064   |
| 0.0022 | 1   | .   |                         |                                         |
| 4023   | N   | N   | . LEU LEU LEU B B 92 92 | . 0.4012 0.4600 0.4653 0.0180 -0.0085 - |
| 0.0003 | 1   | .   |                         |                                         |
| 4024   | CA  | CA  | . LEU LEU LEU B B 92 92 | . 0.4124 0.4513 0.4562 0.0177 -0.0065 - |
| 0.0050 | 1   | .   |                         |                                         |
| 4025   | CB  | CB  | . LEU LEU LEU B B 92 92 | . 0.3796 0.4428 0.4465 0.0249 -0.0014 - |
| 0.0085 | 1   | .   |                         |                                         |
| 4026   | CG  | CG  | . LEU LEU LEU B B 92 92 | . 0.3519 0.4475 0.4569 0.0297 -0.0232   |
| 0.0106 | 1   | .   |                         |                                         |
| 4027   | CD1 | CD1 | . LEU LEU LEU B B 92 92 | . 0.3778 0.4303 0.4328 0.0675 0.0196 -  |
| 0.0243 | 1   | .   |                         |                                         |
| 4028   | CD2 | CD2 | . LEU LEU LEU B B 92 92 | . 0.1066 0.4604 0.4540 0.1107 0.0054    |
| 0.0090 | 1   | .   |                         |                                         |
| 4029   | C   | C   | . LEU LEU LEU B B 92 92 | . 0.4220 0.4577 0.4657 0.0170 -0.0033 - |
| 0.0055 | 1   | .   |                         |                                         |
| 4030   | O   | O   | . LEU LEU LEU B B 92 92 | . 0.4324 0.4624 0.4693 0.0252 0.0111 -  |
| 0.0129 | 1   | .   |                         |                                         |
| 4031   | N   | N   | . MET MET MET B B 93 93 | . 0.4387 0.4709 0.4660 0.0171 -0.0089   |
| 0.0007 | 1   | .   |                         |                                         |
| 4032   | CA  | CA  | . MET MET MET B B 93 93 | . 0.4271 0.4654 0.4630 0.0182 -0.0050   |
| 0.0050 | 1   | .   |                         |                                         |

|        |     |     |                         |                                         |
|--------|-----|-----|-------------------------|-----------------------------------------|
| 4033   | CB  | CB  | . MET MET MET B B 93 93 | . 0.4307 0.4610 0.4564 0.0286 -0.0177   |
| 0.0069 | 1   | .   |                         |                                         |
| 4034   | CG  | CG  | . MET MET MET B B 93 93 | . 0.4204 0.4350 0.4430 0.0404 0.0076    |
| 0.0093 | 1   | .   |                         |                                         |
| 4035   | SD  | SD  | . MET MET MET B B 93 93 | . 0.4538 0.5247 0.4521 0.0528 -0.0380   |
| 0.0407 | 1   | .   |                         |                                         |
| 4036   | CE  | CE  | . MET MET MET B B 93 93 | . 0.4100 0.4869 0.4335 0.0979 0.0254    |
| 0.0112 | 1   | .   |                         |                                         |
| 4037   | C   | C   | . MET MET MET B B 93 93 | . 0.4207 0.4671 0.4632 0.0203 -0.0026   |
| 0.0083 | 1   | .   |                         |                                         |
| 4038   | O   | O   | . MET MET MET B B 93 93 | . 0.4017 0.4741 0.4495 0.0245 0.0005    |
| 0.0222 | 1   | .   |                         |                                         |
| 4039   | N   | N   | . LEU LEU LEU B B 94 94 | . 0.4302 0.4744 0.4734 0.0278 0.0020    |
| 0.0056 | 1   | .   |                         |                                         |
| 4040   | CA  | CA  | . LEU LEU LEU B B 94 94 | . 0.4716 0.4886 0.4859 0.0247 0.0012 -  |
| 0.0006 | 1   | .   |                         |                                         |
| 4041   | CB  | CB  | . LEU LEU LEU B B 94 94 | . 0.4668 0.4841 0.4884 0.0354 0.0064 -  |
| 0.0186 | 1   | .   |                         |                                         |
| 4042   | CG  | CG  | . LEU LEU LEU B B 94 94 | . 0.5039 0.5090 0.4965 0.0348 -0.0004 - |
| 0.0442 | 1   | .   |                         |                                         |
| 4043   | CD1 | CD1 | . LEU LEU LEU B B 94 94 | . 0.5600 0.5415 0.5019 0.0555 0.0420 -  |
| 0.0658 | 1   | .   |                         |                                         |
| 4044   | CD2 | CD2 | . LEU LEU LEU B B 94 94 | . 0.4180 0.4830 0.5268 0.1072 0.0185 -  |
| 0.0919 | 1   | .   |                         |                                         |
| 4045   | C   | C   | . LEU LEU LEU B B 94 94 | . 0.4783 0.4892 0.4967 0.0175 0.0023 -  |
| 0.0033 | 1   | .   |                         |                                         |
| 4046   | O   | O   | . LEU LEU LEU B B 94 94 | . 0.4714 0.4847 0.4863 0.0109 0.0024    |
| 0.0125 | 1   | .   |                         |                                         |
| 4047   | N   | N   | . GLU GLU GLU B B 95 95 | . 0.4786 0.5064 0.5153 0.0095 0.0061    |
| 0.0018 | 1   | .   |                         |                                         |
| 4048   | CA  | CA  | . GLU GLU GLU B B 95 95 | . 0.4963 0.5226 0.5313 0.0083 0.0036    |
| 0.0083 | 1   | .   |                         |                                         |
| 4049   | CB  | CB  | . GLU GLU GLU B B 95 95 | . 0.5080 0.5404 0.5529 0.0079 0.0005    |
| 0.0089 | 1   | .   |                         |                                         |
| 4050   | CG  | CG  | . GLU GLU GLU B B 95 95 | . 0.6008 0.6228 0.5970 0.0107 0.0146    |
| 0.0162 | 1   | .   |                         |                                         |
| 4051   | CD  | CD  | . GLU GLU GLU B B 95 95 | . 0.7285 0.7004 0.7214 0.0151 0.0333    |
| 0.0478 | 1   | .   |                         |                                         |
| 4052   | OE1 | OE1 | . GLU GLU GLU B B 95 95 | . 0.7991 0.7732 0.7298 0.0136 0.0642    |
| 0.0478 | 1   | .   |                         |                                         |
| 4053   | OE2 | OE2 | . GLU GLU GLU B B 95 95 | . 0.7437 0.7631 0.7651 0.0505 0.0436    |
| 0.0389 | 1   | .   |                         |                                         |
| 4054   | C   | C   | . GLU GLU GLU B B 95 95 | . 0.4787 0.5138 0.5269 0.0087 0.0023    |
| 0.0056 | 1   | .   |                         |                                         |
| 4055   | O   | O   | . GLU GLU GLU B B 95 95 | . 0.4626 0.5255 0.5363 0.0207 -0.0002   |
| 0.0128 | 1   | .   |                         |                                         |
| 4056   | N   | N   | . LEU LEU LEU B B 96 96 | . 0.4774 0.5162 0.5262 0.0108 0.0007    |
| 0.0031 | 1   | .   |                         |                                         |
| 4057   | CA  | CA  | . LEU LEU LEU B B 96 96 | . 0.4800 0.5125 0.5131 0.0199 0.0047    |
| 0.0014 | 1   | .   |                         |                                         |
| 4058   | CB  | CB  | . LEU LEU LEU B B 96 96 | . 0.4889 0.5223 0.5239 0.0221 0.0121    |
| 0.0031 | 1   | .   |                         |                                         |
| 4059   | CG  | CG  | . LEU LEU LEU B B 96 96 | . 0.5197 0.5515 0.5337 0.0330 0.0264    |
| 0.0095 | 1   | .   |                         |                                         |
| 4060   | CD1 | CD1 | . LEU LEU LEU B B 96 96 | . 0.4848 0.5867 0.5780 0.0422 0.0100    |
| 0.0229 | 1   | .   |                         |                                         |
| 4061   | CD2 | CD2 | . LEU LEU LEU B B 96 96 | . 0.5208 0.5502 0.5382 0.0709 0.0213 -  |
| 0.0016 | 1   | .   |                         |                                         |
| 4062   | C   | C   | . LEU LEU LEU B B 96 96 | . 0.4691 0.5072 0.5063 0.0176 -0.0032 - |
| 0.0023 | 1   | .   |                         |                                         |

|        |     |     |                             |        |        |        |        |         |   |
|--------|-----|-----|-----------------------------|--------|--------|--------|--------|---------|---|
| 4063   | O   | O   | . LEU LEU LEU B B 96 96 .   | 0.4292 | 0.5231 | 0.4976 | 0.0257 | -0.0161 | - |
| 0.0057 | 1   | .   |                             |        |        |        |        |         |   |
| 4064   | N   | N   | . ASP ASP ASP B B 97 97 .   | 0.4786 | 0.5087 | 0.5017 | 0.0194 | -0.0008 |   |
| 0.0006 | 1   | .   |                             |        |        |        |        |         |   |
| 4065   | CA  | CA  | . ASP ASP ASP B B 97 97 .   | 0.4815 | 0.4974 | 0.5010 | 0.0148 | -0.0031 | - |
| 0.0036 | 1   | .   |                             |        |        |        |        |         |   |
| 4066   | CB  | CB  | . ASP ASP ASP B B 97 97 .   | 0.4804 | 0.5032 | 0.4899 | 0.0157 | -0.0033 | - |
| 0.0021 | 1   | .   |                             |        |        |        |        |         |   |
| 4067   | CG  | CG  | . ASP ASP ASP B B 97 97 .   | 0.5110 | 0.5103 | 0.4925 | 0.0405 | -0.0134 |   |
| 0.0007 | 1   | .   |                             |        |        |        |        |         |   |
| 4068   | OD1 | OD1 | . ASP ASP ASP B B 97 97 .   | 0.4580 | 0.5078 | 0.4699 | 0.0548 | -0.0545 |   |
| 0.0290 | 1   | .   |                             |        |        |        |        |         |   |
| 4069   | OD2 | OD2 | . ASP ASP ASP B B 97 97 .   | 0.5952 | 0.5543 | 0.5125 | 0.1157 | 0.0083  |   |
| 0.0173 | 1   | .   |                             |        |        |        |        |         |   |
| 4070   | C   | C   | . ASP ASP ASP B B 97 97 .   | 0.4885 | 0.5067 | 0.5152 | 0.0165 | 0.0029  | - |
| 0.0083 | 1   | .   |                             |        |        |        |        |         |   |
| 4071   | O   | O   | . ASP ASP ASP B B 97 97 .   | 0.4910 | 0.5094 | 0.5472 | 0.0236 | 0.0047  |   |
| 0.0019 | 1   | .   |                             |        |        |        |        |         |   |
| 4072   | N   | N   | . GLY GLY GLY B B 98 98 .   | 0.4929 | 0.5186 | 0.5297 | 0.0202 | 0.0063  | - |
| 0.0016 | 1   | .   |                             |        |        |        |        |         |   |
| 4073   | CA  | CA  | . GLY GLY GLY B B 98 98 .   | 0.5078 | 0.5156 | 0.5232 | 0.0177 | 0.0119  | - |
| 0.0005 | 1   | .   |                             |        |        |        |        |         |   |
| 4074   | C   | C   | . GLY GLY GLY B B 98 98 .   | 0.5177 | 0.5233 | 0.5323 | 0.0168 | 0.0092  | - |
| 0.0009 | 1   | .   |                             |        |        |        |        |         |   |
| 4075   | O   | O   | . GLY GLY GLY B B 98 98 .   | 0.5196 | 0.5337 | 0.5440 | 0.0265 | 0.0151  | - |
| 0.0009 | 1   | .   |                             |        |        |        |        |         |   |
| 4076   | N   | N   | . THR THR THR B B 99 99 .   | 0.5136 | 0.5273 | 0.5356 | 0.0188 | 0.0003  |   |
| 0.0020 | 1   | .   |                             |        |        |        |        |         |   |
| 4077   | CA  | CA  | . THR THR THR B B 99 99 .   | 0.5206 | 0.5293 | 0.5330 | 0.0188 | -0.0040 | - |
| 0.0010 | 1   | .   |                             |        |        |        |        |         |   |
| 4078   | CB  | CB  | . THR THR THR B B 99 99 .   | 0.5235 | 0.5263 | 0.5342 | 0.0232 | -0.0098 | - |
| 0.0049 | 1   | .   |                             |        |        |        |        |         |   |
| 4079   | OG1 | OG1 | . THR THR THR B B 99 99 .   | 0.4788 | 0.5333 | 0.5401 | 0.0433 | -0.0133 | - |
| 0.0211 | 1   | .   |                             |        |        |        |        |         |   |
| 4080   | CG2 | CG2 | . THR THR THR B B 99 99 .   | 0.5167 | 0.5187 | 0.5168 | 0.0305 | -0.0076 |   |
| 0.0021 | 1   | .   |                             |        |        |        |        |         |   |
| 4081   | C   | C   | . THR THR THR B B 99 99 .   | 0.5224 | 0.5228 | 0.5417 | 0.0181 | -0.0001 |   |
| 0.0009 | 1   | .   |                             |        |        |        |        |         |   |
| 4082   | O   | O   | . THR THR THR B B 99 99 .   | 0.5150 | 0.5166 | 0.5477 | 0.0131 | 0.0003  | - |
| 0.0135 | 1   | .   |                             |        |        |        |        |         |   |
| 4083   | N   | N   | . GLU GLU GLU B B 100 100 . | 0.5162 | 0.5246 | 0.5346 | 0.0227 | 0.0024  |   |
| 0.0071 | 1   | .   |                             |        |        |        |        |         |   |
| 4084   | CA  | CA  | . GLU GLU GLU B B 100 100 . | 0.5294 | 0.5275 | 0.5343 | 0.0213 | -0.0067 |   |
| 0.0094 | 1   | .   |                             |        |        |        |        |         |   |
| 4085   | CB  | CB  | . GLU GLU GLU B B 100 100 . | 0.5514 | 0.5361 | 0.5516 | 0.0167 | -0.0088 |   |
| 0.0197 | 1   | .   |                             |        |        |        |        |         |   |
| 4086   | CG  | CG  | . GLU GLU GLU B B 100 100 . | 0.6154 | 0.5914 | 0.6033 | 0.0267 | -0.0077 |   |
| 0.0002 | 1   | .   |                             |        |        |        |        |         |   |
| 4087   | CD  | CD  | . GLU GLU GLU B B 100 100 . | 0.6814 | 0.6946 | 0.7182 | 0.0262 | -0.0428 | - |
| 0.0191 | 1   | .   |                             |        |        |        |        |         |   |
| 4088   | OE1 | OE1 | . GLU GLU GLU B B 100 100 . | 0.6317 | 0.7247 | 0.7296 | 0.0575 | -0.0470 | - |
| 0.0115 | 1   | .   |                             |        |        |        |        |         |   |
| 4089   | OE2 | OE2 | . GLU GLU GLU B B 100 100 . | 0.7965 | 0.7150 | 0.7304 | 0.0343 | -0.0187 | - |
| 0.0369 | 1   | .   |                             |        |        |        |        |         |   |
| 4090   | C   | C   | . GLU GLU GLU B B 100 100 . | 0.5105 | 0.5063 | 0.5176 | 0.0176 | -0.0048 |   |
| 0.0125 | 1   | .   |                             |        |        |        |        |         |   |
| 4091   | O   | O   | . GLU GLU GLU B B 100 100 . | 0.5022 | 0.5147 | 0.5233 | 0.0232 | -0.0014 |   |
| 0.0235 | 1   | .   |                             |        |        |        |        |         |   |
| 4092   | N   | N   | . ASN ASN ASN B B 101 101 . | 0.4736 | 0.4815 | 0.5028 | 0.0137 | -0.0049 |   |
| 0.0186 | 1   | .   |                             |        |        |        |        |         |   |

|        |     |     |                             |        |        |        |         |         |   |
|--------|-----|-----|-----------------------------|--------|--------|--------|---------|---------|---|
| 4093   | CA  | CA  | . ASN ASN ASN B B 101 101 . | 0.4664 | 0.4629 | 0.4751 | 0.0008  | -0.0004 |   |
| 0.0186 | 1   | .   |                             |        |        |        |         |         |   |
| 4094   | CB  | CB  | . ASN ASN ASN B B 101 101 . | 0.4604 | 0.4650 | 0.4877 | 0.0009  | -0.0062 |   |
| 0.0198 | 1   | .   |                             |        |        |        |         |         |   |
| 4095   | CG  | CG  | . ASN ASN ASN B B 101 101 . | 0.5062 | 0.5231 | 0.5160 | 0.0034  | 0.0119  |   |
| 0.0333 | 1   | .   |                             |        |        |        |         |         |   |
| 4096   | OD1 | OD1 | . ASN ASN ASN B B 101 101 . | 0.4861 | 0.5839 | 0.5830 | -0.0524 | 0.0772  |   |
| 0.0449 | 1   | .   |                             |        |        |        |         |         |   |
| 4097   | ND2 | ND2 | . ASN ASN ASN B B 101 101 . | 0.4955 | 0.5497 | 0.5595 | 0.0274  | 0.0359  |   |
| 0.0532 | 1   | .   |                             |        |        |        |         |         |   |
| 4098   | C   | C   | . ASN ASN ASN B B 101 101 . | 0.4420 | 0.4299 | 0.4542 | -0.0021 | 0.0025  |   |
| 0.0091 | 1   | .   |                             |        |        |        |         |         |   |
| 4099   | O   | O   | . ASN ASN ASN B B 101 101 . | 0.4509 | 0.3892 | 0.4372 | -0.0050 | 0.0091  |   |
| 0.0172 | 1   | .   |                             |        |        |        |         |         |   |
| 4100   | N   | N   | . LYS LYS LYS B B 102 102 . | 0.4224 | 0.4023 | 0.4263 | -0.0082 | 0.0057  |   |
| 0.0059 | 1   | .   |                             |        |        |        |         |         |   |
| 4101   | CA  | CA  | . LYS LYS LYS B B 102 102 . | 0.4006 | 0.4068 | 0.4202 | -0.0081 | 0.0057  | - |
| 0.0080 | 1   | .   |                             |        |        |        |         |         |   |
| 4102   | CB  | CB  | . LYS LYS LYS B B 102 102 . | 0.3890 | 0.3949 | 0.4049 | -0.0126 | 0.0175  |   |
| 0.0003 | 1   | .   |                             |        |        |        |         |         |   |
| 4103   | CG  | CG  | . LYS LYS LYS B B 102 102 . | 0.3390 | 0.3758 | 0.3994 | -0.0176 | 0.0459  | - |
| 0.0190 | 1   | .   |                             |        |        |        |         |         |   |
| 4104   | CD  | CD  | . LYS LYS LYS B B 102 102 . | 0.3791 | 0.3793 | 0.4066 | -0.0027 | 0.0191  | - |
| 0.0250 | 1   | .   |                             |        |        |        |         |         |   |
| 4105   | CE  | CE  | . LYS LYS LYS B B 102 102 . | 0.3672 | 0.3837 | 0.3764 | 0.0142  | 0.0266  | - |
| 0.0022 | 1   | .   |                             |        |        |        |         |         |   |
| 4106   | NZ  | NZ  | . LYS LYS LYS B B 102 102 . | 0.3829 | 0.3861 | 0.3464 | 0.0717  | 0.0306  | - |
| 0.0306 | 1   | .   |                             |        |        |        |         |         |   |
| 4107   | C   | C   | . LYS LYS LYS B B 102 102 . | 0.4023 | 0.4185 | 0.4103 | -0.0062 | 0.0025  | - |
| 0.0062 | 1   | .   |                             |        |        |        |         |         |   |
| 4108   | O   | O   | . LYS LYS LYS B B 102 102 . | 0.4079 | 0.4212 | 0.4097 | -0.0073 | -0.0128 | - |
| 0.0080 | 1   | .   |                             |        |        |        |         |         |   |
| 4109   | N   | N   | . SER SER SER B B 103 103 . | 0.4030 | 0.4330 | 0.4222 | -0.0080 | 0.0006  | - |
| 0.0087 | 1   | .   |                             |        |        |        |         |         |   |
| 4110   | CA  | CA  | . SER SER SER B B 103 103 . | 0.4026 | 0.4532 | 0.4416 | -0.0041 | 0.0001  |   |
| 0.0036 | 1   | .   |                             |        |        |        |         |         |   |
| 4111   | CB  | CB  | . SER SER SER B B 103 103 . | 0.4157 | 0.4424 | 0.4623 | -0.0015 | -0.0074 |   |
| 0.0073 | 1   | .   |                             |        |        |        |         |         |   |
| 4112   | OG  | OG  | . SER SER SER B B 103 103 . | 0.4211 | 0.5155 | 0.5049 | 0.0183  | -0.0053 |   |
| 0.0531 | 1   | .   |                             |        |        |        |         |         |   |
| 4113   | C   | C   | . SER SER SER B B 103 103 . | 0.3980 | 0.4538 | 0.4365 | -0.0062 | -0.0057 | - |
| 0.0099 | 1   | .   |                             |        |        |        |         |         |   |
| 4114   | O   | O   | . SER SER SER B B 103 103 . | 0.3649 | 0.4702 | 0.4484 | -0.0195 | -0.0147 | - |
| 0.0234 | 1   | .   |                             |        |        |        |         |         |   |
| 4115   | N   | N   | . LYS LYS LYS B B 104 104 . | 0.3688 | 0.4389 | 0.4283 | 0.0014  | -0.0031 | - |
| 0.0019 | 1   | .   |                             |        |        |        |         |         |   |
| 4116   | CA  | CA  | . LYS LYS LYS B B 104 104 . | 0.3549 | 0.4194 | 0.4099 | 0.0047  | 0.0090  |   |
| 0.0009 | 1   | .   |                             |        |        |        |         |         |   |
| 4117   | CB  | CB  | . LYS LYS LYS B B 104 104 . | 0.3744 | 0.4311 | 0.4194 | 0.0081  | 0.0071  | - |
| 0.0031 | 1   | .   |                             |        |        |        |         |         |   |
| 4118   | CG  | CG  | . LYS LYS LYS B B 104 104 . | 0.4232 | 0.4587 | 0.4888 | -0.0219 | 0.0291  | - |
| 0.0073 | 1   | .   |                             |        |        |        |         |         |   |
| 4119   | CD  | CD  | . LYS LYS LYS B B 104 104 . | 0.5279 | 0.5124 | 0.5506 | 0.0064  | 0.0394  | - |
| 0.0542 | 1   | .   |                             |        |        |        |         |         |   |
| 4120   | CE  | CE  | . LYS LYS LYS B B 104 104 . | 0.5880 | 0.5477 | 0.5556 | 0.0156  | 0.0341  | - |
| 0.0562 | 1   | .   |                             |        |        |        |         |         |   |
| 4121   | NZ  | NZ  | . LYS LYS LYS B B 104 104 . | 0.5894 | 0.5865 | 0.5553 | 0.0132  | 0.0292  | - |
| 0.1082 | 1   | .   |                             |        |        |        |         |         |   |
| 4122   | C   | C   | . LYS LYS LYS B B 104 104 . | 0.3236 | 0.4054 | 0.3970 | 0.0097  | 0.0091  | - |
| 0.0029 | 1   | .   |                             |        |        |        |         |         |   |

|        |     |     |                             |        |        |        |         |         |   |
|--------|-----|-----|-----------------------------|--------|--------|--------|---------|---------|---|
| 4123   | O   | O   | . LYS LYS LYS B B 104 104 . | 0.3194 | 0.4134 | 0.4070 | 0.0125  | 0.0254  |   |
| 0.0114 | 1   | .   |                             |        |        |        |         |         |   |
| 4124   | N   | N   | . PHE PHE PHE B B 105 105 . | 0.3031 | 0.3949 | 0.3820 | 0.0160  | 0.0114  |   |
| 0.0034 | 1   | .   |                             |        |        |        |         |         |   |
| 4125   | CA  | CA  | . PHE PHE PHE B B 105 105 . | 0.3103 | 0.3796 | 0.3828 | 0.0154  | 0.0013  |   |
| 0.0017 | 1   | .   |                             |        |        |        |         |         |   |
| 4126   | CB  | CB  | . PHE PHE PHE B B 105 105 . | 0.3357 | 0.3829 | 0.3788 | 0.0199  | 0.0065  |   |
| 0.0045 | 1   | .   |                             |        |        |        |         |         |   |
| 4127   | CG  | CG  | . PHE PHE PHE B B 105 105 . | 0.3461 | 0.4176 | 0.4093 | 0.0047  | -0.0089 |   |
| 0.0094 | 1   | .   |                             |        |        |        |         |         |   |
| 4128   | CD1 | CD1 | . PHE PHE PHE B B 105 105 . | 0.4016 | 0.4443 | 0.4439 | 0.0000  | -0.0066 |   |
| 0.0162 | 1   | .   |                             |        |        |        |         |         |   |
| 4129   | CE1 | CE1 | . PHE PHE PHE B B 105 105 . | 0.4493 | 0.4781 | 0.4686 | 0.0023  | 0.0161  | - |
| 0.0051 | 1   | .   |                             |        |        |        |         |         |   |
| 4130   | CZ  | CZ  | . PHE PHE PHE B B 105 105 . | 0.4378 | 0.4932 | 0.5077 | 0.0002  | -0.0005 | - |
| 0.0137 | 1   | .   |                             |        |        |        |         |         |   |
| 4131   | CE2 | CE2 | . PHE PHE PHE B B 105 105 . | 0.4298 | 0.4754 | 0.4788 | -0.0024 | -0.0068 |   |
| 0.0082 | 1   | .   |                             |        |        |        |         |         |   |
| 4132   | CD2 | CD2 | . PHE PHE PHE B B 105 105 . | 0.3574 | 0.3963 | 0.4188 | 0.0043  | -0.0077 |   |
| 0.0297 | 1   | .   |                             |        |        |        |         |         |   |
| 4133   | C   | C   | . PHE PHE PHE B B 105 105 . | 0.3364 | 0.3784 | 0.3771 | 0.0235  | -0.0001 |   |
| 0.0082 | 1   | .   |                             |        |        |        |         |         |   |
| 4134   | O   | O   | . PHE PHE PHE B B 105 105 . | 0.2925 | 0.3917 | 0.3921 | 0.0392  | -0.0204 |   |
| 0.0047 | 1   | .   |                             |        |        |        |         |         |   |
| 4135   | N   | N   | . GLY GLY GLY B B 106 106 . | 0.3268 | 0.3794 | 0.3824 | 0.0283  | 0.0097  |   |
| 0.0031 | 1   | .   |                             |        |        |        |         |         |   |
| 4136   | CA  | CA  | . GLY GLY GLY B B 106 106 . | 0.3450 | 0.3598 | 0.3700 | 0.0268  | 0.0045  |   |
| 0.0134 | 1   | .   |                             |        |        |        |         |         |   |
| 4137   | C   | C   | . GLY GLY GLY B B 106 106 . | 0.3340 | 0.3527 | 0.3557 | 0.0198  | -0.0007 |   |
| 0.0139 | 1   | .   |                             |        |        |        |         |         |   |
| 4138   | O   | O   | . GLY GLY GLY B B 106 106 . | 0.3067 | 0.3483 | 0.3624 | 0.0180  | 0.0040  |   |
| 0.0260 | 1   | .   |                             |        |        |        |         |         |   |
| 4139   | N   | N   | . ALA ALA ALA B B 107 107 . | 0.3259 | 0.3539 | 0.3523 | 0.0239  | 0.0058  |   |
| 0.0090 | 1   | .   |                             |        |        |        |         |         |   |
| 4140   | CA  | CA  | . ALA ALA ALA B B 107 107 . | 0.3294 | 0.3454 | 0.3450 | 0.0215  | 0.0006  |   |
| 0.0108 | 1   | .   |                             |        |        |        |         |         |   |
| 4141   | CB  | CB  | . ALA ALA ALA B B 107 107 . | 0.3332 | 0.3370 | 0.3455 | 0.0303  | -0.0044 |   |
| 0.0149 | 1   | .   |                             |        |        |        |         |         |   |
| 4142   | C   | C   | . ALA ALA ALA B B 107 107 . | 0.3328 | 0.3588 | 0.3514 | 0.0228  | 0.0014  |   |
| 0.0077 | 1   | .   |                             |        |        |        |         |         |   |
| 4143   | O   | O   | . ALA ALA ALA B B 107 107 . | 0.2992 | 0.3687 | 0.3537 | 0.0554  | 0.0140  |   |
| 0.0118 | 1   | .   |                             |        |        |        |         |         |   |
| 4144   | N   | N   | . ASN ASN ASN B B 108 108 . | 0.3504 | 0.3781 | 0.3640 | 0.0169  | -0.0069 |   |
| 0.0092 | 1   | .   |                             |        |        |        |         |         |   |
| 4145   | CA  | CA  | . ASN ASN ASN B B 108 108 . | 0.3765 | 0.3770 | 0.3663 | -0.0015 | -0.0049 |   |
| 0.0175 | 1   | .   |                             |        |        |        |         |         |   |
| 4146   | CB  | CB  | . ASN ASN ASN B B 108 108 . | 0.3552 | 0.3696 | 0.3556 | -0.0028 | -0.0091 |   |
| 0.0067 | 1   | .   |                             |        |        |        |         |         |   |
| 4147   | CG  | CG  | . ASN ASN ASN B B 108 108 . | 0.3584 | 0.3813 | 0.3372 | 0.0214  | 0.0023  |   |
| 0.0043 | 1   | .   |                             |        |        |        |         |         |   |
| 4148   | OD1 | OD1 | . ASN ASN ASN B B 108 108 . | 0.4397 | 0.4300 | 0.3628 | 0.0524  | -0.0523 | - |
| 0.0247 | 1   | .   |                             |        |        |        |         |         |   |
| 4149   | ND2 | ND2 | . ASN ASN ASN B B 108 108 . | 0.2587 | 0.3310 | 0.2895 | 0.0334  | 0.0344  |   |
| 0.0161 | 1   | .   |                             |        |        |        |         |         |   |
| 4150   | C   | C   | . ASN ASN ASN B B 108 108 . | 0.3953 | 0.3841 | 0.3769 | -0.0004 | -0.0014 |   |
| 0.0107 | 1   | .   |                             |        |        |        |         |         |   |
| 4151   | O   | O   | . ASN ASN ASN B B 108 108 . | 0.4305 | 0.3834 | 0.3771 | -0.0265 | -0.0011 |   |
| 0.0294 | 1   | .   |                             |        |        |        |         |         |   |
| 4152   | N   | N   | . ALA ALA ALA B B 109 109 . | 0.3958 | 0.3903 | 0.3871 | 0.0026  | -0.0020 |   |
| 0.0092 | 1   | .   |                             |        |        |        |         |         |   |



|        |     |     |                             |        |        |        |         |         |   |
|--------|-----|-----|-----------------------------|--------|--------|--------|---------|---------|---|
| 4153   | CA  | CA  | . ALA ALA ALA B B 109 109 . | 0.3980 | 0.3932 | 0.3935 | -0.0085 | -0.0006 |   |
| 0.0067 | 1   | .   |                             |        |        |        |         |         |   |
| 4154   | CB  | CB  | . ALA ALA ALA B B 109 109 . | 0.4074 | 0.3952 | 0.3888 | -0.0083 | -0.0097 | - |
| 0.0026 | 1   | .   |                             |        |        |        |         |         |   |
| 4155   | C   | C   | . ALA ALA ALA B B 109 109 . | 0.3888 | 0.3881 | 0.3896 | -0.0067 | -0.0050 |   |
| 0.0063 | 1   | .   |                             |        |        |        |         |         |   |
| 4156   | O   | O   | . ALA ALA ALA B B 109 109 . | 0.3497 | 0.3868 | 0.4047 | -0.0021 | 0.0041  |   |
| 0.0178 | 1   | .   |                             |        |        |        |         |         |   |
| 4157   | N   | N   | . ILE ILE ILE B B 110 110 . | 0.3773 | 0.3873 | 0.3917 | -0.0038 | -0.0116 |   |
| 0.0078 | 1   | .   |                             |        |        |        |         |         |   |
| 4158   | CA  | CA  | . ILE ILE ILE B B 110 110 . | 0.3868 | 0.3821 | 0.3859 | 0.0032  | -0.0098 | - |
| 0.0009 | 1   | .   |                             |        |        |        |         |         |   |
| 4159   | CB  | CB  | . ILE ILE ILE B B 110 110 . | 0.4000 | 0.3756 | 0.3765 | 0.0053  | -0.0191 | - |
| 0.0043 | 1   | .   |                             |        |        |        |         |         |   |
| 4160   | CG1 | CG1 | . ILE ILE ILE B B 110 110 . | 0.3527 | 0.3946 | 0.4262 | 0.0150  | -0.0183 |   |
| 0.0150 | 1   | .   |                             |        |        |        |         |         |   |
| 4161   | CD1 | CD1 | . ILE ILE ILE B B 110 110 . | 0.4455 | 0.4158 | 0.4225 | 0.0172  | -0.0173 |   |
| 0.0164 | 1   | .   |                             |        |        |        |         |         |   |
| 4162   | CG2 | CG2 | . ILE ILE ILE B B 110 110 . | 0.3125 | 0.3809 | 0.3937 | 0.0165  | -0.0386 | - |
| 0.0118 | 1   | .   |                             |        |        |        |         |         |   |
| 4163   | C   | C   | . ILE ILE ILE B B 110 110 . | 0.3766 | 0.3782 | 0.3777 | -0.0058 | -0.0030 |   |
| 0.0028 | 1   | .   |                             |        |        |        |         |         |   |
| 4164   | O   | O   | . ILE ILE ILE B B 110 110 . | 0.3738 | 0.3639 | 0.3617 | -0.0311 | 0.0176  |   |
| 0.0058 | 1   | .   |                             |        |        |        |         |         |   |
| 4165   | N   | N   | . LEU LEU LEU B B 111 111 . | 0.3586 | 0.3762 | 0.3510 | 0.0063  | 0.0054  |   |
| 0.0054 | 1   | .   |                             |        |        |        |         |         |   |
| 4166   | CA  | CA  | . LEU LEU LEU B B 111 111 . | 0.3364 | 0.3762 | 0.3534 | 0.0003  | 0.0058  |   |
| 0.0080 | 1   | .   |                             |        |        |        |         |         |   |
| 4167   | CB  | CB  | . LEU LEU LEU B B 111 111 . | 0.3346 | 0.3768 | 0.3501 | 0.0067  | 0.0066  |   |
| 0.0219 | 1   | .   |                             |        |        |        |         |         |   |
| 4168   | CG  | CG  | . LEU LEU LEU B B 111 111 . | 0.3335 | 0.3768 | 0.3277 | 0.0026  | 0.0239  |   |
| 0.0227 | 1   | .   |                             |        |        |        |         |         |   |
| 4169   | CD1 | CD1 | . LEU LEU LEU B B 111 111 . | 0.2444 | 0.3379 | 0.3319 | 0.0383  | 0.0247  |   |
| 0.0365 | 1   | .   |                             |        |        |        |         |         |   |
| 4170   | CD2 | CD2 | . LEU LEU LEU B B 111 111 . | 0.3072 | 0.3584 | 0.3440 | 0.0112  | -0.0094 |   |
| 0.0436 | 1   | .   |                             |        |        |        |         |         |   |
| 4171   | C   | C   | . LEU LEU LEU B B 111 111 . | 0.3221 | 0.3825 | 0.3699 | -0.0034 | 0.0103  |   |
| 0.0023 | 1   | .   |                             |        |        |        |         |         |   |
| 4172   | O   | O   | . LEU LEU LEU B B 111 111 . | 0.3129 | 0.3957 | 0.3953 | 0.0191  | 0.0197  | - |
| 0.0019 | 1   | .   |                             |        |        |        |         |         |   |
| 4173   | N   | N   | . GLY GLY GLY B B 112 112 . | 0.3170 | 0.3778 | 0.3702 | -0.0061 | 0.0228  |   |
| 0.0032 | 1   | .   |                             |        |        |        |         |         |   |
| 4174   | CA  | CA  | . GLY GLY GLY B B 112 112 . | 0.3198 | 0.3771 | 0.3669 | -0.0171 | 0.0132  |   |
| 0.0144 | 1   | .   |                             |        |        |        |         |         |   |
| 4175   | C   | C   | . GLY GLY GLY B B 112 112 . | 0.3230 | 0.3590 | 0.3747 | -0.0173 | 0.0014  |   |
| 0.0084 | 1   | .   |                             |        |        |        |         |         |   |
| 4176   | O   | O   | . GLY GLY GLY B B 112 112 . | 0.3295 | 0.3569 | 0.3770 | -0.0180 | 0.0050  |   |
| 0.0007 | 1   | .   |                             |        |        |        |         |         |   |
| 4177   | N   | N   | . VAL VAL VAL B B 113 113 . | 0.3046 | 0.3549 | 0.3672 | -0.0118 | -0.0052 |   |
| 0.0111 | 1   | .   |                             |        |        |        |         |         |   |
| 4178   | CA  | CA  | . VAL VAL VAL B B 113 113 . | 0.3159 | 0.3595 | 0.3573 | -0.0034 | 0.0002  |   |
| 0.0124 | 1   | .   |                             |        |        |        |         |         |   |
| 4179   | CB  | CB  | . VAL VAL VAL B B 113 113 . | 0.2965 | 0.3329 | 0.3485 | -0.0058 | -0.0091 |   |
| 0.0105 | 1   | .   |                             |        |        |        |         |         |   |
| 4180   | CG1 | CG1 | . VAL VAL VAL B B 113 113 . | 0.3213 | 0.3497 | 0.3356 | -0.0005 | 0.0012  |   |
| 0.0311 | 1   | .   |                             |        |        |        |         |         |   |
| 4181   | CG2 | CG2 | . VAL VAL VAL B B 113 113 . | 0.3273 | 0.3525 | 0.3428 | 0.0146  | 0.0021  |   |
| 0.0010 | 1   | .   |                             |        |        |        |         |         |   |
| 4182   | C   | C   | . VAL VAL VAL B B 113 113 . | 0.3132 | 0.3642 | 0.3601 | 0.0009  | -0.0113 |   |
| 0.0124 | 1   | .   |                             |        |        |        |         |         |   |

|        |     |     |                             |        |        |        |         |         |   |
|--------|-----|-----|-----------------------------|--------|--------|--------|---------|---------|---|
| 4183   | O   | O   | . VAL VAL VAL B B 113 113 . | 0.3086 | 0.3711 | 0.3713 | 0.0350  | -0.0082 |   |
| 0.0347 | 1   | .   |                             |        |        |        |         |         |   |
| 4184   | N   | N   | . SER SER SER B B 114 114 . | 0.3182 | 0.3734 | 0.3692 | 0.0017  | -0.0104 |   |
| 0.0060 | 1   | .   |                             |        |        |        |         |         |   |
| 4185   | CA  | CA  | . SER SER SER B B 114 114 . | 0.3076 | 0.3789 | 0.3758 | 0.0099  | -0.0121 | - |
| 0.0060 | 1   | .   |                             |        |        |        |         |         |   |
| 4186   | CB  | CB  | . SER SER SER B B 114 114 . | 0.3217 | 0.3733 | 0.3733 | 0.0077  | -0.0170 | - |
| 0.0057 | 1   | .   |                             |        |        |        |         |         |   |
| 4187   | OG  | OG  | . SER SER SER B B 114 114 . | 0.2254 | 0.3992 | 0.4078 | 0.0190  | -0.0201 | - |
| 0.0329 | 1   | .   |                             |        |        |        |         |         |   |
| 4188   | C   | C   | . SER SER SER B B 114 114 . | 0.3355 | 0.3806 | 0.3887 | 0.0057  | -0.0208 | - |
| 0.0006 | 1   | .   |                             |        |        |        |         |         |   |
| 4189   | O   | O   | . SER SER SER B B 114 114 . | 0.3267 | 0.3896 | 0.3997 | 0.0178  | -0.0290 |   |
| 0.0031 | 1   | .   |                             |        |        |        |         |         |   |
| 4190   | N   | N   | . LEU LEU LEU B B 115 115 . | 0.3240 | 0.3952 | 0.3957 | 0.0137  | -0.0181 | - |
| 0.0002 | 1   | .   |                             |        |        |        |         |         |   |
| 4191   | CA  | CA  | . LEU LEU LEU B B 115 115 . | 0.3232 | 0.3851 | 0.4016 | 0.0024  | -0.0166 |   |
| 0.0004 | 1   | .   |                             |        |        |        |         |         |   |
| 4192   | CB  | CB  | . LEU LEU LEU B B 115 115 . | 0.3052 | 0.4024 | 0.3973 | -0.0080 | -0.0107 | - |
| 0.0067 | 1   | .   |                             |        |        |        |         |         |   |
| 4193   | CG  | CG  | . LEU LEU LEU B B 115 115 . | 0.3548 | 0.4137 | 0.3871 | -0.0242 | -0.0108 | - |
| 0.0237 | 1   | .   |                             |        |        |        |         |         |   |
| 4194   | CD1 | CD1 | . LEU LEU LEU B B 115 115 . | 0.2670 | 0.4242 | 0.3957 | -0.0001 | 0.0294  | - |
| 0.0344 | 1   | .   |                             |        |        |        |         |         |   |
| 4195   | CD2 | CD2 | . LEU LEU LEU B B 115 115 . | 0.2949 | 0.4294 | 0.3755 | -0.0546 | -0.0167 |   |
| 0.0089 | 1   | .   |                             |        |        |        |         |         |   |
| 4196   | C   | C   | . LEU LEU LEU B B 115 115 . | 0.2898 | 0.3942 | 0.4054 | 0.0060  | -0.0125 |   |
| 0.0010 | 1   | .   |                             |        |        |        |         |         |   |
| 4197   | O   | O   | . LEU LEU LEU B B 115 115 . | 0.2441 | 0.4029 | 0.4463 | 0.0153  | -0.0110 |   |
| 0.0222 | 1   | .   |                             |        |        |        |         |         |   |
| 4198   | N   | N   | . ALA ALA ALA B B 116 116 . | 0.2887 | 0.3843 | 0.4008 | 0.0127  | -0.0117 |   |
| 0.0082 | 1   | .   |                             |        |        |        |         |         |   |
| 4199   | CA  | CA  | . ALA ALA ALA B B 116 116 . | 0.3233 | 0.3827 | 0.4009 | -0.0034 | -0.0094 |   |
| 0.0078 | 1   | .   |                             |        |        |        |         |         |   |
| 4200   | CB  | CB  | . ALA ALA ALA B B 116 116 . | 0.3230 | 0.3479 | 0.3716 | 0.0050  | -0.0003 | - |
| 0.0022 | 1   | .   |                             |        |        |        |         |         |   |
| 4201   | C   | C   | . ALA ALA ALA B B 116 116 . | 0.3275 | 0.3960 | 0.4095 | 0.0040  | -0.0028 |   |
| 0.0095 | 1   | .   |                             |        |        |        |         |         |   |
| 4202   | O   | O   | . ALA ALA ALA B B 116 116 . | 0.2998 | 0.4308 | 0.4382 | -0.0129 | -0.0054 |   |
| 0.0092 | 1   | .   |                             |        |        |        |         |         |   |
| 4203   | N   | N   | . VAL VAL VAL B B 117 117 . | 0.3409 | 0.4100 | 0.4019 | 0.0090  | -0.0095 |   |
| 0.0132 | 1   | .   |                             |        |        |        |         |         |   |
| 4204   | CA  | CA  | . VAL VAL VAL B B 117 117 . | 0.3561 | 0.4111 | 0.3985 | -0.0070 | -0.0007 |   |
| 0.0092 | 1   | .   |                             |        |        |        |         |         |   |
| 4205   | CB  | CB  | . VAL VAL VAL B B 117 117 . | 0.3275 | 0.4057 | 0.4067 | 0.0031  | -0.0068 |   |
| 0.0026 | 1   | .   |                             |        |        |        |         |         |   |
| 4206   | CG1 | CG1 | . VAL VAL VAL B B 117 117 . | 0.3784 | 0.4401 | 0.3330 | -0.0048 | 0.0080  |   |
| 0.0004 | 1   | .   |                             |        |        |        |         |         |   |
| 4207   | CG2 | CG2 | . VAL VAL VAL B B 117 117 . | 0.3401 | 0.4424 | 0.3359 | -0.0018 | 0.0089  |   |
| 0.0003 | 1   | .   |                             |        |        |        |         |         |   |
| 4208   | C   | C   | . VAL VAL VAL B B 117 117 . | 0.3758 | 0.4096 | 0.4221 | -0.0038 | -0.0029 |   |
| 0.0112 | 1   | .   |                             |        |        |        |         |         |   |
| 4209   | O   | O   | . VAL VAL VAL B B 117 117 . | 0.3579 | 0.4338 | 0.4538 | -0.0122 | -0.0070 |   |
| 0.0158 | 1   | .   |                             |        |        |        |         |         |   |
| 4210   | N   | N   | . CYS CYS CYS B B 118 118 . | 0.3769 | 0.4110 | 0.4160 | 0.0054  | 0.0001  |   |
| 0.0132 | 1   | .   |                             |        |        |        |         |         |   |
| 4211   | CA  | CA  | . CYS CYS CYS B B 118 118 . | 0.3869 | 0.4151 | 0.4264 | 0.0100  | 0.0046  |   |
| 0.0126 | 1   | .   |                             |        |        |        |         |         |   |
| 4212   | CB  | CB  | . CYS CYS CYS B B 118 118 . | 0.4140 | 0.4143 | 0.4283 | -0.0031 | 0.0076  |   |
| 0.0244 | 1   | .   |                             |        |        |        |         |         |   |

|        |    |    |                             |        |        |        |         |         |   |
|--------|----|----|-----------------------------|--------|--------|--------|---------|---------|---|
| 4213   | SG | SG | . CYS CYS CYS B B 118 118 . | 0.3920 | 0.4503 | 0.4379 | 0.0162  | -0.0177 |   |
| 0.0410 | 1  | .  |                             |        |        |        |         |         |   |
| 4214   | C  | C  | . CYS CYS CYS B B 118 118 . | 0.3882 | 0.4200 | 0.4209 | -0.0033 | 0.0081  |   |
| 0.0097 | 1  | .  |                             |        |        |        |         |         |   |
| 4215   | O  | O  | . CYS CYS CYS B B 118 118 . | 0.3398 | 0.4052 | 0.4319 | -0.0119 | 0.0133  |   |
| 0.0088 | 1  | .  |                             |        |        |        |         |         |   |
| 4216   | N  | N  | . LYS LYS LYS B B 119 119 . | 0.4035 | 0.4317 | 0.4169 | 0.0066  | 0.0013  |   |
| 0.0129 | 1  | .  |                             |        |        |        |         |         |   |
| 4217   | CA | CA | . LYS LYS LYS B B 119 119 . | 0.3992 | 0.4311 | 0.4277 | -0.0037 | 0.0001  |   |
| 0.0048 | 1  | .  |                             |        |        |        |         |         |   |
| 4218   | CB | CB | . LYS LYS LYS B B 119 119 . | 0.3789 | 0.4399 | 0.4249 | 0.0134  | -0.0031 |   |
| 0.0087 | 1  | .  |                             |        |        |        |         |         |   |
| 4219   | CG | CG | . LYS LYS LYS B B 119 119 . | 0.3841 | 0.4171 | 0.4213 | -0.0117 | 0.0056  |   |
| 0.0132 | 1  | .  |                             |        |        |        |         |         |   |
| 4220   | CD | CD | . LYS LYS LYS B B 119 119 . | 0.3137 | 0.5125 | 0.4570 | -0.0137 | 0.0166  | - |
| 0.0107 | 1  | .  |                             |        |        |        |         |         |   |
| 4221   | CE | CE | . LYS LYS LYS B B 119 119 . | 0.4143 | 0.5530 | 0.4835 | -0.0413 | -0.0254 |   |
| 0.0419 | 1  | .  |                             |        |        |        |         |         |   |
| 4222   | NZ | NZ | . LYS LYS LYS B B 119 119 . | 0.2729 | 0.6019 | 0.5362 | -0.0078 | -0.0188 |   |
| 0.0383 | 1  | .  |                             |        |        |        |         |         |   |
| 4223   | C  | C  | . LYS LYS LYS B B 119 119 . | 0.3899 | 0.4338 | 0.4244 | -0.0018 | -0.0025 |   |
| 0.0047 | 1  | .  |                             |        |        |        |         |         |   |
| 4224   | O  | O  | . LYS LYS LYS B B 119 119 . | 0.3677 | 0.4580 | 0.4270 | -0.0140 | -0.0177 |   |
| 0.0089 | 1  | .  |                             |        |        |        |         |         |   |
| 4225   | N  | N  | . ALA ALA ALA B B 120 120 . | 0.3917 | 0.4304 | 0.4231 | 0.0017  | -0.0013 |   |
| 0.0045 | 1  | .  |                             |        |        |        |         |         |   |
| 4226   | CA | CA | . ALA ALA ALA B B 120 120 . | 0.4031 | 0.4390 | 0.4346 | 0.0022  | -0.0057 |   |
| 0.0008 | 1  | .  |                             |        |        |        |         |         |   |
| 4227   | CB | CB | . ALA ALA ALA B B 120 120 . | 0.3691 | 0.4323 | 0.4283 | 0.0049  | -0.0012 | - |
| 0.0120 | 1  | .  |                             |        |        |        |         |         |   |
| 4228   | C  | C  | . ALA ALA ALA B B 120 120 . | 0.4104 | 0.4421 | 0.4381 | 0.0037  | -0.0034 |   |
| 0.0041 | 1  | .  |                             |        |        |        |         |         |   |
| 4229   | O  | O  | . ALA ALA ALA B B 120 120 . | 0.4223 | 0.4633 | 0.4432 | 0.0039  | 0.0017  |   |
| 0.0116 | 1  | .  |                             |        |        |        |         |         |   |
| 4230   | N  | N  | . GLY GLY GLY B B 121 121 . | 0.4206 | 0.4484 | 0.4361 | 0.0079  | -0.0026 |   |
| 0.0096 | 1  | .  |                             |        |        |        |         |         |   |
| 4231   | CA | CA | . GLY GLY GLY B B 121 121 . | 0.4267 | 0.4551 | 0.4498 | -0.0026 | -0.0027 |   |
| 0.0077 | 1  | .  |                             |        |        |        |         |         |   |
| 4232   | C  | C  | . GLY GLY GLY B B 121 121 . | 0.4370 | 0.4692 | 0.4559 | -0.0174 | -0.0075 |   |
| 0.0111 | 1  | .  |                             |        |        |        |         |         |   |
| 4233   | O  | O  | . GLY GLY GLY B B 121 121 . | 0.3959 | 0.4804 | 0.4668 | -0.0413 | -0.0021 |   |
| 0.0300 | 1  | .  |                             |        |        |        |         |         |   |
| 4234   | N  | N  | . ALA ALA ALA B B 122 122 . | 0.4128 | 0.4729 | 0.4598 | -0.0104 | -0.0100 |   |
| 0.0045 | 1  | .  |                             |        |        |        |         |         |   |
| 4235   | CA | CA | . ALA ALA ALA B B 122 122 . | 0.4381 | 0.4858 | 0.4811 | -0.0172 | -0.0086 | - |
| 0.0030 | 1  | .  |                             |        |        |        |         |         |   |
| 4236   | CB | CB | . ALA ALA ALA B B 122 122 . | 0.4175 | 0.4911 | 0.4693 | -0.0077 | -0.0049 | - |
| 0.0029 | 1  | .  |                             |        |        |        |         |         |   |
| 4237   | C  | C  | . ALA ALA ALA B B 122 122 . | 0.4383 | 0.4917 | 0.4904 | -0.0190 | -0.0037 |   |
| 0.0012 | 1  | .  |                             |        |        |        |         |         |   |
| 4238   | O  | O  | . ALA ALA ALA B B 122 122 . | 0.4346 | 0.4973 | 0.5147 | -0.0225 | -0.0052 |   |
| 0.0054 | 1  | .  |                             |        |        |        |         |         |   |
| 4239   | N  | N  | . ALA ALA ALA B B 123 123 . | 0.4212 | 0.4883 | 0.4936 | -0.0186 | -0.0027 | - |
| 0.0056 | 1  | .  |                             |        |        |        |         |         |   |
| 4240   | CA | CA | . ALA ALA ALA B B 123 123 . | 0.4399 | 0.4969 | 0.5101 | -0.0129 | -0.0059 |   |
| 0.0021 | 1  | .  |                             |        |        |        |         |         |   |
| 4241   | CB | CB | . ALA ALA ALA B B 123 123 . | 0.4184 | 0.4887 | 0.5146 | -0.0120 | -0.0178 |   |
| 0.0035 | 1  | .  |                             |        |        |        |         |         |   |
| 4242   | C  | C  | . ALA ALA ALA B B 123 123 . | 0.4540 | 0.5042 | 0.5307 | -0.0059 | -0.0087 |   |
| 0.0054 | 1  | .  |                             |        |        |        |         |         |   |

|        |     |     |                             |        |        |        |         |         |   |
|--------|-----|-----|-----------------------------|--------|--------|--------|---------|---------|---|
| 4243   | O   | O   | . ALA ALA ALA B B 123 123 . | 0.4403 | 0.5173 | 0.5399 | -0.0088 | -0.0079 |   |
| 0.0074 | 1   | .   |                             |        |        |        |         |         |   |
| 4244   | N   | N   | . GLU GLU GLU B B 124 124 . | 0.4761 | 0.5170 | 0.5424 | 0.0033  | -0.0044 |   |
| 0.0089 | 1   | .   |                             |        |        |        |         |         |   |
| 4245   | CA  | CA  | . GLU GLU GLU B B 124 124 . | 0.5130 | 0.5313 | 0.5506 | 0.0049  | -0.0084 |   |
| 0.0082 | 1   | .   |                             |        |        |        |         |         |   |
| 4246   | CB  | CB  | . GLU GLU GLU B B 124 124 . | 0.5218 | 0.5425 | 0.5537 | 0.0114  | -0.0021 |   |
| 0.0064 | 1   | .   |                             |        |        |        |         |         |   |
| 4247   | CG  | CG  | . GLU GLU GLU B B 124 124 . | 0.5782 | 0.5916 | 0.6072 | 0.0033  | -0.0049 |   |
| 0.0116 | 1   | .   |                             |        |        |        |         |         |   |
| 4248   | CD  | CD  | . GLU GLU GLU B B 124 124 . | 0.6897 | 0.6538 | 0.6821 | -0.0312 | 0.0072  |   |
| 0.0233 | 1   | .   |                             |        |        |        |         |         |   |
| 4249   | OE1 | OE1 | . GLU GLU GLU B B 124 124 . | 0.7156 | 0.6463 | 0.7522 | -0.0462 | -0.0189 | - |
| 0.0129 | 1   | .   |                             |        |        |        |         |         |   |
| 4250   | OE2 | OE2 | . GLU GLU GLU B B 124 124 . | 0.7431 | 0.7073 | 0.6723 | 0.0044  | 0.0189  |   |
| 0.0366 | 1   | .   |                             |        |        |        |         |         |   |
| 4251   | C   | C   | . GLU GLU GLU B B 124 124 . | 0.5103 | 0.5280 | 0.5498 | 0.0067  | -0.0059 |   |
| 0.0086 | 1   | .   |                             |        |        |        |         |         |   |
| 4252   | O   | O   | . GLU GLU GLU B B 124 124 . | 0.5171 | 0.5357 | 0.5705 | 0.0166  | -0.0100 |   |
| 0.0054 | 1   | .   |                             |        |        |        |         |         |   |
| 4253   | N   | N   | . ARG ARG ARG B B 125 125 . | 0.5193 | 0.5344 | 0.5465 | -0.0001 | 0.0006  |   |
| 0.0050 | 1   | .   |                             |        |        |        |         |         |   |
| 4254   | CA  | CA  | . ARG ARG ARG B B 125 125 . | 0.5300 | 0.5465 | 0.5608 | -0.0068 | 0.0004  |   |
| 0.0022 | 1   | .   |                             |        |        |        |         |         |   |
| 4255   | CB  | CB  | . ARG ARG ARG B B 125 125 . | 0.5346 | 0.5509 | 0.5507 | -0.0021 | 0.0003  |   |
| 0.0088 | 1   | .   |                             |        |        |        |         |         |   |
| 4256   | CG  | CG  | . ARG ARG ARG B B 125 125 . | 0.5742 | 0.5856 | 0.5778 | 0.0118  | 0.0000  |   |
| 0.0237 | 1   | .   |                             |        |        |        |         |         |   |
| 4257   | CD  | CD  | . ARG ARG ARG B B 125 125 . | 0.6061 | 0.6741 | 0.6432 | 0.0210  | -0.0147 |   |
| 0.0118 | 1   | .   |                             |        |        |        |         |         |   |
| 4258   | NE  | NE  | . ARG ARG ARG B B 125 125 . | 0.6746 | 0.7116 | 0.6834 | 0.0212  | -0.0150 |   |
| 0.0230 | 1   | .   |                             |        |        |        |         |         |   |
| 4259   | CZ  | CZ  | . ARG ARG ARG B B 125 125 . | 0.7022 | 0.7129 | 0.7300 | 0.0173  | 0.0030  |   |
| 0.0236 | 1   | .   |                             |        |        |        |         |         |   |
| 4260   | NH1 | NH1 | . ARG ARG ARG B B 125 125 . | 0.7292 | 0.7480 | 0.7383 | -0.0114 | 0.0238  |   |
| 0.0154 | 1   | .   |                             |        |        |        |         |         |   |
| 4261   | NH2 | NH2 | . ARG ARG ARG B B 125 125 . | 0.7353 | 0.7120 | 0.7414 | 0.0032  | 0.0088  |   |
| 0.0418 | 1   | .   |                             |        |        |        |         |         |   |
| 4262   | C   | C   | . ARG ARG ARG B B 125 125 . | 0.5204 | 0.5377 | 0.5541 | -0.0148 | 0.0037  |   |
| 0.0031 | 1   | .   |                             |        |        |        |         |         |   |
| 4263   | O   | O   | . ARG ARG ARG B B 125 125 . | 0.5178 | 0.5487 | 0.5645 | -0.0223 | 0.0085  | - |
| 0.0069 | 1   | .   |                             |        |        |        |         |         |   |
| 4264   | N   | N   | . GLU GLU GLU B B 126 126 . | 0.5247 | 0.5371 | 0.5547 | -0.0184 | 0.0034  | - |
| 0.0004 | 1   | .   |                             |        |        |        |         |         |   |
| 4265   | CA  | CA  | . GLU GLU GLU B B 126 126 . | 0.5320 | 0.5394 | 0.5577 | -0.0120 | 0.0084  | - |
| 0.0034 | 1   | .   |                             |        |        |        |         |         |   |
| 4266   | CB  | CB  | . GLU GLU GLU B B 126 126 . | 0.5416 | 0.5502 | 0.5741 | -0.0168 | 0.0102  | - |
| 0.0011 | 1   | .   |                             |        |        |        |         |         |   |
| 4267   | CG  | CG  | . GLU GLU GLU B B 126 126 . | 0.6166 | 0.6270 | 0.6049 | -0.0340 | 0.0236  | - |
| 0.0020 | 1   | .   |                             |        |        |        |         |         |   |
| 4268   | CD  | CD  | . GLU GLU GLU B B 126 126 . | 0.6611 | 0.7355 | 0.6822 | -0.0553 | 0.0251  |   |
| 0.0027 | 1   | .   |                             |        |        |        |         |         |   |
| 4269   | OE1 | OE1 | . GLU GLU GLU B B 126 126 . | 0.7347 | 0.8082 | 0.6954 | -0.0697 | 0.0369  |   |
| 0.0060 | 1   | .   |                             |        |        |        |         |         |   |
| 4270   | OE2 | OE2 | . GLU GLU GLU B B 126 126 . | 0.6965 | 0.7296 | 0.6805 | -0.0686 | 0.0261  |   |
| 0.0217 | 1   | .   |                             |        |        |        |         |         |   |
| 4271   | C   | C   | . GLU GLU GLU B B 126 126 . | 0.5128 | 0.5198 | 0.5385 | -0.0121 | 0.0039  | - |
| 0.0033 | 1   | .   |                             |        |        |        |         |         |   |
| 4272   | O   | O   | . GLU GLU GLU B B 126 126 . | 0.5056 | 0.5190 | 0.5544 | 0.0001  | 0.0062  | - |
| 0.0092 | 1   | .   |                             |        |        |        |         |         |   |

|        |     |     |                             |        |        |        |         |         |   |
|--------|-----|-----|-----------------------------|--------|--------|--------|---------|---------|---|
| 4273   | N   | N   | . LEU LEU LEU B B 127 127 . | 0.4828 | 0.5001 | 0.5026 | -0.0128 | -0.0022 | - |
| 0.0022 | 1   | .   |                             |        |        |        |         |         |   |
| 4274   | CA  | CA  | . LEU LEU LEU B B 127 127 . | 0.4603 | 0.4788 | 0.4762 | -0.0055 | -0.0092 | - |
| 0.0056 | 1   | .   |                             |        |        |        |         |         |   |
| 4275   | CB  | CB  | . LEU LEU LEU B B 127 127 . | 0.4600 | 0.4816 | 0.4794 | -0.0079 | -0.0107 | - |
| 0.0077 | 1   | .   |                             |        |        |        |         |         |   |
| 4276   | CG  | CG  | . LEU LEU LEU B B 127 127 . | 0.4884 | 0.4866 | 0.4841 | -0.0101 | -0.0234 | - |
| 0.0045 | 1   | .   |                             |        |        |        |         |         |   |
| 4277   | CD1 | CD1 | . LEU LEU LEU B B 127 127 . | 0.4830 | 0.5141 | 0.4912 | -0.0107 | -0.0539 | - |
| 0.0042 | 1   | .   |                             |        |        |        |         |         |   |
| 4278   | CD2 | CD2 | . LEU LEU LEU B B 127 127 . | 0.5084 | 0.4835 | 0.4783 | -0.0683 | -0.0313 | - |
| 0.0027 | 1   | .   |                             |        |        |        |         |         |   |
| 4279   | C   | C   | . LEU LEU LEU B B 127 127 . | 0.4415 | 0.4682 | 0.4608 | -0.0024 | -0.0046 | - |
| 0.0000 | 1   | .   |                             |        |        |        |         |         |   |
| 4280   | O   | O   | . LEU LEU LEU B B 127 127 . | 0.4116 | 0.4749 | 0.4394 | -0.0086 | -0.0121 | - |
| 0.0033 | 1   | .   |                             |        |        |        |         |         |   |
| 4281   | N   | N   | . PRO PRO PRO B B 128 128 . | 0.4384 | 0.4553 | 0.4552 | -0.0050 | -0.0072 | - |
| 0.0005 | 1   | .   |                             |        |        |        |         |         |   |
| 4282   | CA  | CA  | . PRO PRO PRO B B 128 128 . | 0.4394 | 0.4546 | 0.4568 | -0.0024 | -0.0059 | - |
| 0.0046 | 1   | .   |                             |        |        |        |         |         |   |
| 4283   | CB  | CB  | . PRO PRO PRO B B 128 128 . | 0.4504 | 0.4587 | 0.4625 | -0.0061 | -0.0072 | - |
| 0.0063 | 1   | .   |                             |        |        |        |         |         |   |
| 4284   | CG  | CG  | . PRO PRO PRO B B 128 128 . | 0.4493 | 0.4764 | 0.4547 | -0.0040 | -0.0043 | - |
| 0.0061 | 1   | .   |                             |        |        |        |         |         |   |
| 4285   | CD  | CD  | . PRO PRO PRO B B 128 128 . | 0.4311 | 0.4595 | 0.4438 | -0.0011 | -0.0040 | - |
| 0.0023 | 1   | .   |                             |        |        |        |         |         |   |
| 4286   | C   | C   | . PRO PRO PRO B B 128 128 . | 0.4380 | 0.4542 | 0.4563 | -0.0109 | -0.0096 | - |
| 0.0052 | 1   | .   |                             |        |        |        |         |         |   |
| 4287   | O   | O   | . PRO PRO PRO B B 128 128 . | 0.4179 | 0.4470 | 0.4573 | -0.0140 | -0.0177 | - |
| 0.0112 | 1   | .   |                             |        |        |        |         |         |   |
| 4288   | N   | N   | . LEU LEU LEU B B 129 129 . | 0.4309 | 0.4437 | 0.4366 | -0.0098 | -0.0179 | - |
| 0.0067 | 1   | .   |                             |        |        |        |         |         |   |
| 4289   | CA  | CA  | . LEU LEU LEU B B 129 129 . | 0.4273 | 0.4408 | 0.4375 | -0.0114 | -0.0142 | - |
| 0.0054 | 1   | .   |                             |        |        |        |         |         |   |
| 4290   | CB  | CB  | . LEU LEU LEU B B 129 129 . | 0.4436 | 0.4420 | 0.4469 | -0.0099 | -0.0132 | - |
| 0.0052 | 1   | .   |                             |        |        |        |         |         |   |
| 4291   | CG  | CG  | . LEU LEU LEU B B 129 129 . | 0.4088 | 0.4313 | 0.4334 | -0.0041 | -0.0080 | - |
| 0.0013 | 1   | .   |                             |        |        |        |         |         |   |
| 4292   | CD1 | CD1 | . LEU LEU LEU B B 129 129 . | 0.4055 | 0.4297 | 0.3835 | 0.0232  | -0.0073 | - |
| 0.0050 | 1   | .   |                             |        |        |        |         |         |   |
| 4293   | CD2 | CD2 | . LEU LEU LEU B B 129 129 . | 0.2972 | 0.4073 | 0.3024 | -0.0034 | 0.0611  | - |
| 0.0305 | 1   | .   |                             |        |        |        |         |         |   |
| 4294   | C   | C   | . LEU LEU LEU B B 129 129 . | 0.4275 | 0.4420 | 0.4387 | -0.0128 | -0.0081 | - |
| 0.0077 | 1   | .   |                             |        |        |        |         |         |   |
| 4295   | O   | O   | . LEU LEU LEU B B 129 129 . | 0.4092 | 0.4259 | 0.4398 | -0.0248 | -0.0094 | - |
| 0.0260 | 1   | .   |                             |        |        |        |         |         |   |
| 4296   | N   | N   | . TYR TYR TYR B B 130 130 . | 0.4353 | 0.4361 | 0.4289 | -0.0094 | -0.0072 | - |
| 0.0004 | 1   | .   |                             |        |        |        |         |         |   |
| 4297   | CA  | CA  | . TYR TYR TYR B B 130 130 . | 0.4456 | 0.4404 | 0.4266 | -0.0090 | -0.0114 | - |
| 0.0045 | 1   | .   |                             |        |        |        |         |         |   |
| 4298   | CB  | CB  | . TYR TYR TYR B B 130 130 . | 0.4324 | 0.4296 | 0.3980 | -0.0104 | -0.0170 | - |
| 0.0102 | 1   | .   |                             |        |        |        |         |         |   |
| 4299   | CG  | CG  | . TYR TYR TYR B B 130 130 . | 0.4542 | 0.4655 | 0.4414 | -0.0220 | -0.0155 | - |
| 0.0025 | 1   | .   |                             |        |        |        |         |         |   |
| 4300   | CD1 | CD1 | . TYR TYR TYR B B 130 130 . | 0.4801 | 0.4873 | 0.4678 | -0.0489 | -0.0335 | - |
| 0.0108 | 1   | .   |                             |        |        |        |         |         |   |
| 4301   | CE1 | CE1 | . TYR TYR TYR B B 130 130 . | 0.4694 | 0.4870 | 0.4968 | -0.0243 | -0.0290 | - |
| 0.0045 | 1   | .   |                             |        |        |        |         |         |   |
| 4302   | CZ  | CZ  | . TYR TYR TYR B B 130 130 . | 0.4964 | 0.5000 | 0.5129 | -0.0186 | -0.0172 | - |
| 0.0084 | 1   | .   |                             |        |        |        |         |         |   |

|        |     |     |                             |        |        |        |         |         |   |
|--------|-----|-----|-----------------------------|--------|--------|--------|---------|---------|---|
| 4303   | OH  | OH  | . TYR TYR TYR B B 130 130 . | 0.5094 | 0.5153 | 0.5923 | 0.0000  | -0.0349 |   |
| 0.0090 | 1   | .   |                             |        |        |        |         |         |   |
| 4304   | CE2 | CE2 | . TYR TYR TYR B B 130 130 . | 0.4716 | 0.4719 | 0.4989 | -0.0216 | -0.0121 |   |
| 0.0129 | 1   | .   |                             |        |        |        |         |         |   |
| 4305   | CD2 | CD2 | . TYR TYR TYR B B 130 130 . | 0.4469 | 0.4780 | 0.4620 | -0.0681 | -0.0151 |   |
| 0.0043 | 1   | .   |                             |        |        |        |         |         |   |
| 4306   | C   | C   | . TYR TYR TYR B B 130 130 . | 0.4447 | 0.4397 | 0.4302 | -0.0158 | -0.0128 | - |
| 0.0120 | 1   | .   |                             |        |        |        |         |         |   |
| 4307   | O   | O   | . TYR TYR TYR B B 130 130 . | 0.4314 | 0.4322 | 0.4250 | -0.0061 | -0.0205 | - |
| 0.0363 | 1   | .   |                             |        |        |        |         |         |   |
| 4308   | N   | N   | . ARG ARG ARG B B 131 131 . | 0.4708 | 0.4694 | 0.4551 | -0.0225 | -0.0088 | - |
| 0.0051 | 1   | .   |                             |        |        |        |         |         |   |
| 4309   | CA  | CA  | . ARG ARG ARG B B 131 131 . | 0.4808 | 0.4764 | 0.4751 | -0.0131 | -0.0103 |   |
| 0.0006 | 1   | .   |                             |        |        |        |         |         |   |
| 4310   | CB  | CB  | . ARG ARG ARG B B 131 131 . | 0.4853 | 0.4867 | 0.4856 | -0.0280 | -0.0030 | - |
| 0.0061 | 1   | .   |                             |        |        |        |         |         |   |
| 4311   | CG  | CG  | . ARG ARG ARG B B 131 131 . | 0.5362 | 0.5189 | 0.5578 | 0.0141  | 0.0046  |   |
| 0.0012 | 1   | .   |                             |        |        |        |         |         |   |
| 4312   | CD  | CD  | . ARG ARG ARG B B 131 131 . | 0.6121 | 0.6104 | 0.6549 | -0.0208 | 0.0111  | - |
| 0.0259 | 1   | .   |                             |        |        |        |         |         |   |
| 4313   | NE  | NE  | . ARG ARG ARG B B 131 131 . | 0.7061 | 0.6332 | 0.7284 | 0.0023  | 0.0124  | - |
| 0.0316 | 1   | .   |                             |        |        |        |         |         |   |
| 4314   | CZ  | CZ  | . ARG ARG ARG B B 131 131 . | 0.7409 | 0.6925 | 0.7217 | 0.0179  | 0.0106  | - |
| 0.0147 | 1   | .   |                             |        |        |        |         |         |   |
| 4315   | NH1 | NH1 | . ARG ARG ARG B B 131 131 . | 0.6953 | 0.7080 | 0.7409 | 0.0393  | 0.0403  | - |
| 0.0256 | 1   | .   |                             |        |        |        |         |         |   |
| 4316   | NH2 | NH2 | . ARG ARG ARG B B 131 131 . | 0.7626 | 0.7416 | 0.7304 | 0.0007  | 0.0049  |   |
| 0.0195 | 1   | .   |                             |        |        |        |         |         |   |
| 4317   | C   | C   | . ARG ARG ARG B B 131 131 . | 0.4698 | 0.4719 | 0.4706 | -0.0177 | -0.0062 |   |
| 0.0026 | 1   | .   |                             |        |        |        |         |         |   |
| 4318   | O   | O   | . ARG ARG ARG B B 131 131 . | 0.4720 | 0.4757 | 0.4979 | -0.0342 | -0.0154 |   |
| 0.0007 | 1   | .   |                             |        |        |        |         |         |   |
| 4319   | N   | N   | . HIS HIS HIS B B 132 132 . | 0.4717 | 0.4654 | 0.4573 | -0.0080 | -0.0082 | - |
| 0.0011 | 1   | .   |                             |        |        |        |         |         |   |
| 4320   | CA  | CA  | . HIS HIS HIS B B 132 132 . | 0.4499 | 0.4579 | 0.4506 | 0.0023  | -0.0054 |   |
| 0.0001 | 1   | .   |                             |        |        |        |         |         |   |
| 4321   | CB  | CB  | . HIS HIS HIS B B 132 132 . | 0.4522 | 0.4567 | 0.4615 | 0.0083  | -0.0018 | - |
| 0.0008 | 1   | .   |                             |        |        |        |         |         |   |
| 4322   | CG  | CG  | . HIS HIS HIS B B 132 132 . | 0.4698 | 0.4750 | 0.5012 | 0.0142  | -0.0101 |   |
| 0.0026 | 1   | .   |                             |        |        |        |         |         |   |
| 4323   | ND1 | ND1 | . HIS HIS HIS B B 132 132 . | 0.4214 | 0.4771 | 0.5372 | 0.0142  | -0.0217 |   |
| 0.0140 | 1   | .   |                             |        |        |        |         |         |   |
| 4324   | CE1 | CE1 | . HIS HIS HIS B B 132 132 . | 0.4864 | 0.4925 | 0.5239 | 0.0008  | -0.0196 |   |
| 0.0006 | 1   | .   |                             |        |        |        |         |         |   |
| 4325   | NE2 | NE2 | . HIS HIS HIS B B 132 132 . | 0.4472 | 0.4828 | 0.4844 | 0.0060  | -0.0208 |   |
| 0.0236 | 1   | .   |                             |        |        |        |         |         |   |
| 4326   | CD2 | CD2 | . HIS HIS HIS B B 132 132 . | 0.4926 | 0.4752 | 0.4858 | 0.0133  | -0.0199 |   |
| 0.0057 | 1   | .   |                             |        |        |        |         |         |   |
| 4327   | C   | C   | . HIS HIS HIS B B 132 132 . | 0.4418 | 0.4482 | 0.4428 | -0.0001 | -0.0031 | - |
| 0.0045 | 1   | .   |                             |        |        |        |         |         |   |
| 4328   | O   | O   | . HIS HIS HIS B B 132 132 . | 0.4483 | 0.4412 | 0.4370 | -0.0069 | 0.0005  | - |
| 0.0057 | 1   | .   |                             |        |        |        |         |         |   |
| 4329   | N   | N   | . ILE ILE ILE B B 133 133 . | 0.4507 | 0.4528 | 0.4385 | 0.0024  | -0.0115 |   |
| 0.0036 | 1   | .   |                             |        |        |        |         |         |   |
| 4330   | CA  | CA  | . ILE ILE ILE B B 133 133 . | 0.4360 | 0.4436 | 0.4429 | -0.0112 | -0.0101 |   |
| 0.0031 | 1   | .   |                             |        |        |        |         |         |   |
| 4331   | CB  | CB  | . ILE ILE ILE B B 133 133 . | 0.4352 | 0.4302 | 0.4244 | -0.0004 | -0.0227 |   |
| 0.0073 | 1   | .   |                             |        |        |        |         |         |   |
| 4332   | CG1 | CG1 | . ILE ILE ILE B B 133 133 . | 0.4205 | 0.4294 | 0.4168 | -0.0062 | -0.0376 |   |
| 0.0207 | 1   | .   |                             |        |        |        |         |         |   |

|        |     |     |                             |        |        |        |         |         |   |
|--------|-----|-----|-----------------------------|--------|--------|--------|---------|---------|---|
| 4333   | CD1 | CD1 | . ILE ILE ILE B B 133 133 . | 0.3891 | 0.3121 | 0.4212 | 0.0120  | -0.0453 |   |
| 0.0329 | 1   | .   |                             |        |        |        |         |         |   |
| 4334   | CG2 | CG2 | . ILE ILE ILE B B 133 133 . | 0.4013 | 0.4258 | 0.4152 | -0.0398 | -0.0203 | - |
| 0.0129 | 1   | .   |                             |        |        |        |         |         |   |
| 4335   | C   | C   | . ILE ILE ILE B B 133 133 . | 0.4435 | 0.4618 | 0.4610 | -0.0072 | -0.0106 |   |
| 0.0050 | 1   | .   |                             |        |        |        |         |         |   |
| 4336   | O   | O   | . ILE ILE ILE B B 133 133 . | 0.4455 | 0.4617 | 0.4700 | -0.0038 | -0.0058 |   |
| 0.0073 | 1   | .   |                             |        |        |        |         |         |   |
| 4337   | N   | N   | . ALA ALA ALA B B 134 134 . | 0.4405 | 0.4670 | 0.4757 | -0.0032 | -0.0062 |   |
| 0.0019 | 1   | .   |                             |        |        |        |         |         |   |
| 4338   | CA  | CA  | . ALA ALA ALA B B 134 134 . | 0.4652 | 0.4887 | 0.4829 | 0.0019  | -0.0037 |   |
| 0.0077 | 1   | .   |                             |        |        |        |         |         |   |
| 4339   | CB  | CB  | . ALA ALA ALA B B 134 134 . | 0.4684 | 0.4924 | 0.4804 | -0.0046 | -0.0008 |   |
| 0.0046 | 1   | .   |                             |        |        |        |         |         |   |
| 4340   | C   | C   | . ALA ALA ALA B B 134 134 . | 0.4854 | 0.5118 | 0.5006 | -0.0031 | -0.0067 |   |
| 0.0083 | 1   | .   |                             |        |        |        |         |         |   |
| 4341   | O   | O   | . ALA ALA ALA B B 134 134 . | 0.4962 | 0.5207 | 0.5061 | -0.0029 | -0.0100 |   |
| 0.0073 | 1   | .   |                             |        |        |        |         |         |   |
| 4342   | N   | N   | . GLN GLN GLN B B 135 135 . | 0.4927 | 0.5173 | 0.5148 | -0.0070 | -0.0004 |   |
| 0.0137 | 1   | .   |                             |        |        |        |         |         |   |
| 4343   | CA  | CA  | . GLN GLN GLN B B 135 135 . | 0.5183 | 0.5302 | 0.5371 | -0.0085 | -0.0050 |   |
| 0.0100 | 1   | .   |                             |        |        |        |         |         |   |
| 4344   | CB  | CB  | . GLN GLN GLN B B 135 135 . | 0.5142 | 0.5409 | 0.5438 | -0.0140 | -0.0006 |   |
| 0.0150 | 1   | .   |                             |        |        |        |         |         |   |
| 4345   | CG  | CG  | . GLN GLN GLN B B 135 135 . | 0.5373 | 0.5418 | 0.5900 | -0.0038 | 0.0007  |   |
| 0.0060 | 1   | .   |                             |        |        |        |         |         |   |
| 4346   | CD  | CD  | . GLN GLN GLN B B 135 135 . | 0.5766 | 0.5865 | 0.6244 | -0.0049 | 0.0065  |   |
| 0.0092 | 1   | .   |                             |        |        |        |         |         |   |
| 4347   | OE1 | OE1 | . GLN GLN GLN B B 135 135 . | 0.5583 | 0.6042 | 0.6870 | 0.0368  | 0.0148  |   |
| 0.0289 | 1   | .   |                             |        |        |        |         |         |   |
| 4348   | NE2 | NE2 | . GLN GLN GLN B B 135 135 . | 0.5758 | 0.6008 | 0.6311 | -0.0127 | -0.0267 |   |
| 0.0019 | 1   | .   |                             |        |        |        |         |         |   |
| 4349   | C   | C   | . GLN GLN GLN B B 135 135 . | 0.5240 | 0.5310 | 0.5377 | -0.0066 | -0.0130 |   |
| 0.0127 | 1   | .   |                             |        |        |        |         |         |   |
| 4350   | O   | O   | . GLN GLN GLN B B 135 135 . | 0.5310 | 0.5366 | 0.5361 | -0.0238 | -0.0311 |   |
| 0.0098 | 1   | .   |                             |        |        |        |         |         |   |
| 4351   | N   | N   | . LEU LEU LEU B B 136 136 . | 0.5239 | 0.5238 | 0.5190 | -0.0059 | -0.0125 |   |
| 0.0040 | 1   | .   |                             |        |        |        |         |         |   |
| 4352   | CA  | CA  | . LEU LEU LEU B B 136 136 . | 0.5291 | 0.5267 | 0.5306 | -0.0007 | -0.0113 |   |
| 0.0021 | 1   | .   |                             |        |        |        |         |         |   |
| 4353   | CB  | CB  | . LEU LEU LEU B B 136 136 . | 0.5200 | 0.5219 | 0.5332 | 0.0001  | -0.0085 |   |
| 0.0074 | 1   | .   |                             |        |        |        |         |         |   |
| 4354   | CG  | CG  | . LEU LEU LEU B B 136 136 . | 0.5164 | 0.4953 | 0.5294 | 0.0037  | -0.0224 |   |
| 0.0205 | 1   | .   |                             |        |        |        |         |         |   |
| 4355   | CD1 | CD1 | . LEU LEU LEU B B 136 136 . | 0.5177 | 0.4092 | 0.5343 | 0.0188  | -0.0441 |   |
| 0.0206 | 1   | .   |                             |        |        |        |         |         |   |
| 4356   | CD2 | CD2 | . LEU LEU LEU B B 136 136 . | 0.4867 | 0.4994 | 0.5375 | 0.0247  | -0.0163 |   |
| 0.0261 | 1   | .   |                             |        |        |        |         |         |   |
| 4357   | C   | C   | . LEU LEU LEU B B 136 136 . | 0.5398 | 0.5389 | 0.5493 | -0.0062 | -0.0097 | - |
| 0.0010 | 1   | .   |                             |        |        |        |         |         |   |
| 4358   | O   | O   | . LEU LEU LEU B B 136 136 . | 0.5362 | 0.5376 | 0.5524 | -0.0062 | -0.0116 | - |
| 0.0036 | 1   | .   |                             |        |        |        |         |         |   |
| 4359   | N   | N   | . ALA ALA ALA B B 137 137 . | 0.5713 | 0.5526 | 0.5698 | -0.0028 | -0.0119 | - |
| 0.0042 | 1   | .   |                             |        |        |        |         |         |   |
| 4360   | CA  | CA  | . ALA ALA ALA B B 137 137 . | 0.6009 | 0.5746 | 0.5894 | -0.0057 | -0.0099 |   |
| 0.0002 | 1   | .   |                             |        |        |        |         |         |   |
| 4361   | CB  | CB  | . ALA ALA ALA B B 137 137 . | 0.5938 | 0.5593 | 0.5902 | -0.0101 | -0.0148 | - |
| 0.0033 | 1   | .   |                             |        |        |        |         |         |   |
| 4362   | C   | C   | . ALA ALA ALA B B 137 137 . | 0.6330 | 0.6051 | 0.6082 | -0.0070 | -0.0124 |   |
| 0.0061 | 1   | .   |                             |        |        |        |         |         |   |

|        |     |     |                             |        |        |        |         |         |   |
|--------|-----|-----|-----------------------------|--------|--------|--------|---------|---------|---|
| 4363   | O   | O   | . ALA ALA ALA B B 137 137 . | 0.6355 | 0.6074 | 0.6082 | -0.0184 | -0.0202 |   |
| 0.0161 | 1   | .   |                             |        |        |        |         |         |   |
| 4364   | N   | N   | . GLY GLY GLY B B 138 138 . | 0.6566 | 0.6314 | 0.6326 | -0.0057 | -0.0121 |   |
| 0.0103 | 1   | .   |                             |        |        |        |         |         |   |
| 4365   | CA  | CA  | . GLY GLY GLY B B 138 138 . | 0.6837 | 0.6630 | 0.6598 | -0.0047 | -0.0118 |   |
| 0.0069 | 1   | .   |                             |        |        |        |         |         |   |
| 4366   | C   | C   | . GLY GLY GLY B B 138 138 . | 0.7060 | 0.6953 | 0.6805 | -0.0014 | -0.0068 |   |
| 0.0052 | 1   | .   |                             |        |        |        |         |         |   |
| 4367   | O   | O   | . GLY GLY GLY B B 138 138 . | 0.7157 | 0.7079 | 0.6800 | -0.0006 | -0.0199 |   |
| 0.0061 | 1   | .   |                             |        |        |        |         |         |   |
| 4368   | N   | N   | . ASN ASN ASN B B 139 139 . | 0.7134 | 0.7070 | 0.6900 | -0.0010 | -0.0079 |   |
| 0.0097 | 1   | .   |                             |        |        |        |         |         |   |
| 4369   | CA  | CA  | . ASN ASN ASN B B 139 139 . | 0.7231 | 0.7254 | 0.7077 | -0.0054 | -0.0078 |   |
| 0.0083 | 1   | .   |                             |        |        |        |         |         |   |
| 4370   | CB  | CB  | . ASN ASN ASN B B 139 139 . | 0.7232 | 0.7228 | 0.7021 | -0.0156 | -0.0110 |   |
| 0.0101 | 1   | .   |                             |        |        |        |         |         |   |
| 4371   | CG  | CG  | . ASN ASN ASN B B 139 139 . | 0.7385 | 0.7477 | 0.7285 | -0.0230 | -0.0218 |   |
| 0.0236 | 1   | .   |                             |        |        |        |         |         |   |
| 4372   | OD1 | OD1 | . ASN ASN ASN B B 139 139 . | 0.7681 | 0.7678 | 0.7274 | -0.0393 | -0.0290 |   |
| 0.0338 | 1   | .   |                             |        |        |        |         |         |   |
| 4373   | ND2 | ND2 | . ASN ASN ASN B B 139 139 . | 0.7065 | 0.7526 | 0.7090 | -0.0484 | -0.0626 |   |
| 0.0197 | 1   | .   |                             |        |        |        |         |         |   |
| 4374   | C   | C   | . ASN ASN ASN B B 139 139 . | 0.7232 | 0.7309 | 0.7170 | -0.0080 | -0.0081 |   |
| 0.0021 | 1   | .   |                             |        |        |        |         |         |   |
| 4375   | O   | O   | . ASN ASN ASN B B 139 139 . | 0.7149 | 0.7409 | 0.7312 | -0.0169 | -0.0135 |   |
| 0.0020 | 1   | .   |                             |        |        |        |         |         |   |
| 4376   | N   | N   | . SER SER SER B B 140 140 . | 0.7369 | 0.7371 | 0.7295 | -0.0061 | -0.0107 | - |
| 0.0016 | 1   | .   |                             |        |        |        |         |         |   |
| 4377   | CA  | CA  | . SER SER SER B B 140 140 . | 0.7432 | 0.7458 | 0.7348 | -0.0071 | -0.0048 |   |
| 0.0032 | 1   | .   |                             |        |        |        |         |         |   |
| 4378   | CB  | CB  | . SER SER SER B B 140 140 . | 0.7444 | 0.7538 | 0.7404 | -0.0104 | -0.0036 |   |
| 0.0018 | 1   | .   |                             |        |        |        |         |         |   |
| 4379   | OG  | OG  | . SER SER SER B B 140 140 . | 0.7667 | 0.7699 | 0.7382 | -0.0298 | -0.0061 | - |
| 0.0007 | 1   | .   |                             |        |        |        |         |         |   |
| 4380   | C   | C   | . SER SER SER B B 140 140 . | 0.7415 | 0.7456 | 0.7388 | -0.0042 | -0.0022 |   |
| 0.0056 | 1   | .   |                             |        |        |        |         |         |   |
| 4381   | O   | O   | . SER SER SER B B 140 140 . | 0.7480 | 0.7588 | 0.7530 | 0.0030  | -0.0030 |   |
| 0.0085 | 1   | .   |                             |        |        |        |         |         |   |
| 4382   | N   | N   | . ASP ASP ASP B B 141 141 . | 0.7331 | 0.7379 | 0.7294 | -0.0062 | 0.0022  |   |
| 0.0098 | 1   | .   |                             |        |        |        |         |         |   |
| 4383   | CA  | CA  | . ASP ASP ASP B B 141 141 . | 0.7274 | 0.7329 | 0.7231 | -0.0094 | -0.0013 |   |
| 0.0085 | 1   | .   |                             |        |        |        |         |         |   |
| 4384   | CB  | CB  | . ASP ASP ASP B B 141 141 . | 0.7586 | 0.7577 | 0.7424 | -0.0038 | 0.0104  |   |
| 0.0147 | 1   | .   |                             |        |        |        |         |         |   |
| 4385   | CG  | CG  | . ASP ASP ASP B B 141 141 . | 0.8319 | 0.8189 | 0.8038 | 0.0152  | 0.0172  |   |
| 0.0272 | 1   | .   |                             |        |        |        |         |         |   |
| 4386   | OD1 | OD1 | . ASP ASP ASP B B 141 141 . | 0.8760 | 0.8993 | 0.8532 | 0.0457  | 0.0512  |   |
| 0.0321 | 1   | .   |                             |        |        |        |         |         |   |
| 4387   | OD2 | OD2 | . ASP ASP ASP B B 141 141 . | 0.8908 | 0.8949 | 0.8121 | 0.0038  | 0.0466  |   |
| 0.0240 | 1   | .   |                             |        |        |        |         |         |   |
| 4388   | C   | C   | . ASP ASP ASP B B 141 141 . | 0.7084 | 0.7078 | 0.6976 | -0.0080 | 0.0040  |   |
| 0.0110 | 1   | .   |                             |        |        |        |         |         |   |
| 4389   | O   | O   | . ASP ASP ASP B B 141 141 . | 0.7204 | 0.7181 | 0.7195 | -0.0150 | 0.0039  |   |
| 0.0024 | 1   | .   |                             |        |        |        |         |         |   |
| 4390   | N   | N   | . LEU LEU LEU B B 142 142 . | 0.6413 | 0.6484 | 0.6336 | -0.0131 | -0.0017 |   |
| 0.0091 | 1   | .   |                             |        |        |        |         |         |   |
| 4391   | CA  | CA  | . LEU LEU LEU B B 142 142 . | 0.5756 | 0.5758 | 0.5876 | -0.0040 | -0.0010 | - |
| 0.0005 | 1   | .   |                             |        |        |        |         |         |   |
| 4392   | CB  | CB  | . LEU LEU LEU B B 142 142 . | 0.5522 | 0.5618 | 0.5557 | -0.0021 | -0.0069 | - |
| 0.0040 | 1   | .   |                             |        |        |        |         |         |   |







|        |     |     |                             |        |        |        |         |         |   |
|--------|-----|-----|-----------------------------|--------|--------|--------|---------|---------|---|
| 4453   | CB  | CB  | . ASN ASN ASN B B 150 150 . | 0.4341 | 0.4211 | 0.4134 | 0.0053  | 0.0049  | - |
| 0.0015 | 1   | .   |                             |        |        |        |         |         |   |
| 4454   | CG  | CG  | . ASN ASN ASN B B 150 150 . | 0.4370 | 0.4234 | 0.4441 | 0.0076  | 0.0057  |   |
| 0.0160 | 1   | .   |                             |        |        |        |         |         |   |
| 4455   | OD1 | OD1 | . ASN ASN ASN B B 150 150 . | 0.3951 | 0.4288 | 0.4806 | 0.0306  | -0.0017 |   |
| 0.0245 | 1   | .   |                             |        |        |        |         |         |   |
| 4456   | ND2 | ND2 | . ASN ASN ASN B B 150 150 . | 0.4534 | 0.4465 | 0.4692 | 0.0401  | 0.0324  |   |
| 0.0392 | 1   | .   |                             |        |        |        |         |         |   |
| 4457   | C   | C   | . ASN ASN ASN B B 150 150 . | 0.4190 | 0.4117 | 0.3921 | 0.0116  | 0.0001  |   |
| 0.0087 | 1   | .   |                             |        |        |        |         |         |   |
| 4458   | O   | O   | . ASN ASN ASN B B 150 150 . | 0.4122 | 0.4228 | 0.3990 | -0.0103 | -0.0072 |   |
| 0.0006 | 1   | .   |                             |        |        |        |         |         |   |
| 4459   | N   | N   | . VAL VAL VAL B B 151 151 . | 0.4109 | 0.4119 | 0.3887 | 0.0265  | 0.0007  |   |
| 0.0044 | 1   | .   |                             |        |        |        |         |         |   |
| 4460   | CA  | CA  | . VAL VAL VAL B B 151 151 . | 0.4207 | 0.4335 | 0.3979 | 0.0190  | -0.0046 | - |
| 0.0109 | 1   | .   |                             |        |        |        |         |         |   |
| 4461   | CB  | CB  | . VAL VAL VAL B B 151 151 . | 0.4066 | 0.4277 | 0.4018 | 0.0255  | -0.0047 |   |
| 0.0022 | 1   | .   |                             |        |        |        |         |         |   |
| 4462   | CG1 | CG1 | . VAL VAL VAL B B 151 151 . | 0.4285 | 0.4391 | 0.4208 | 0.0087  | -0.0375 | - |
| 0.0226 | 1   | .   |                             |        |        |        |         |         |   |
| 4463   | CG2 | CG2 | . VAL VAL VAL B B 151 151 . | 0.3807 | 0.4541 | 0.4054 | 0.0158  | 0.0184  | - |
| 0.0113 | 1   | .   |                             |        |        |        |         |         |   |
| 4464   | C   | C   | . VAL VAL VAL B B 151 151 . | 0.4244 | 0.4356 | 0.4109 | 0.0287  | -0.0006 | - |
| 0.0152 | 1   | .   |                             |        |        |        |         |         |   |
| 4465   | O   | O   | . VAL VAL VAL B B 151 151 . | 0.4399 | 0.4431 | 0.4114 | 0.0334  | -0.0113 | - |
| 0.0376 | 1   | .   |                             |        |        |        |         |         |   |
| 4466   | N   | N   | . ILE ILE ILE B B 152 152 . | 0.4180 | 0.4398 | 0.3991 | 0.0355  | -0.0002 | - |
| 0.0120 | 1   | .   |                             |        |        |        |         |         |   |
| 4467   | CA  | CA  | . ILE ILE ILE B B 152 152 . | 0.4253 | 0.4529 | 0.4259 | 0.0215  | -0.0089 | - |
| 0.0136 | 1   | .   |                             |        |        |        |         |         |   |
| 4468   | CB  | CB  | . ILE ILE ILE B B 152 152 . | 0.4183 | 0.4485 | 0.4245 | 0.0252  | -0.0149 | - |
| 0.0068 | 1   | .   |                             |        |        |        |         |         |   |
| 4469   | CG1 | CG1 | . ILE ILE ILE B B 152 152 . | 0.4386 | 0.4371 | 0.4532 | 0.0222  | 0.0112  | - |
| 0.0038 | 1   | .   |                             |        |        |        |         |         |   |
| 4470   | CD1 | CD1 | . ILE ILE ILE B B 152 152 . | 0.4991 | 0.4781 | 0.5606 | 0.0149  | 0.0400  |   |
| 0.0405 | 1   | .   |                             |        |        |        |         |         |   |
| 4471   | CG2 | CG2 | . ILE ILE ILE B B 152 152 . | 0.3336 | 0.4225 | 0.4140 | 0.0168  | -0.0319 |   |
| 0.0078 | 1   | .   |                             |        |        |        |         |         |   |
| 4472   | C   | C   | . ILE ILE ILE B B 152 152 . | 0.4534 | 0.4843 | 0.4489 | 0.0304  | -0.0141 | - |
| 0.0213 | 1   | .   |                             |        |        |        |         |         |   |
| 4473   | O   | O   | . ILE ILE ILE B B 152 152 . | 0.4558 | 0.4871 | 0.4198 | 0.0268  | -0.0239 | - |
| 0.0391 | 1   | .   |                             |        |        |        |         |         |   |
| 4474   | N   | N   | . ASN ASN ASN B B 153 153 . | 0.4924 | 0.5162 | 0.4759 | 0.0338  | -0.0204 | - |
| 0.0314 | 1   | .   |                             |        |        |        |         |         |   |
| 4475   | CA  | CA  | . ASN ASN ASN B B 153 153 . | 0.5151 | 0.5155 | 0.4945 | 0.0253  | -0.0149 | - |
| 0.0231 | 1   | .   |                             |        |        |        |         |         |   |
| 4476   | CB  | CB  | . ASN ASN ASN B B 153 153 . | 0.5210 | 0.5381 | 0.5218 | 0.0303  | -0.0027 | - |
| 0.0290 | 1   | .   |                             |        |        |        |         |         |   |
| 4477   | CG  | CG  | . ASN ASN ASN B B 153 153 . | 0.6321 | 0.5353 | 0.5505 | 0.0349  | 0.0057  | - |
| 0.0260 | 1   | .   |                             |        |        |        |         |         |   |
| 4478   | OD1 | OD1 | . ASN ASN ASN B B 153 153 . | 0.7602 | 0.5740 | 0.5265 | 0.0577  | 0.0174  | - |
| 0.0568 | 1   | .   |                             |        |        |        |         |         |   |
| 4479   | ND2 | ND2 | . ASN ASN ASN B B 153 153 . | 0.7220 | 0.5554 | 0.4963 | 0.0990  | -0.0244 | - |
| 0.0227 | 1   | .   |                             |        |        |        |         |         |   |
| 4480   | C   | C   | . ASN ASN ASN B B 153 153 . | 0.5174 | 0.5260 | 0.4985 | 0.0278  | -0.0135 | - |
| 0.0237 | 1   | .   |                             |        |        |        |         |         |   |
| 4481   | O   | O   | . ASN ASN ASN B B 153 153 . | 0.5021 | 0.5356 | 0.4901 | 0.0480  | -0.0267 | - |
| 0.0305 | 1   | .   |                             |        |        |        |         |         |   |
| 4482   | N   | N   | . GLY GLY GLY B B 154 154 . | 0.4990 | 0.5109 | 0.4871 | 0.0296  | -0.0140 | - |
| 0.0232 | 1   | .   |                             |        |        |        |         |         |   |

|        |     |     |                             |        |        |        |         |         |   |
|--------|-----|-----|-----------------------------|--------|--------|--------|---------|---------|---|
| 4483   | CA  | CA  | . GLY GLY GLY B B 154 154 . | 0.4979 | 0.5118 | 0.4673 | 0.0171  | -0.0116 | - |
| 0.0318 | 1   | .   |                             |        |        |        |         |         |   |
| 4484   | C   | C   | . GLY GLY GLY B B 154 154 . | 0.4814 | 0.5013 | 0.4387 | 0.0152  | -0.0215 | - |
| 0.0462 | 1   | .   |                             |        |        |        |         |         |   |
| 4485   | O   | O   | . GLY GLY GLY B B 154 154 . | 0.4784 | 0.4996 | 0.4224 | 0.0217  | -0.0348 | - |
| 0.0658 | 1   | .   |                             |        |        |        |         |         |   |
| 4486   | N   | N   | . ASN ASN ASN B B 160 160 . | 0.6256 | 0.6130 | 0.6304 | 0.0247  | -0.0163 | - |
| 0.0140 | 1   | .   |                             |        |        |        |         |         |   |
| 4487   | CA  | CA  | . ASN ASN ASN B B 160 160 . | 0.6066 | 0.6119 | 0.6167 | 0.0158  | -0.0250 | - |
| 0.0175 | 1   | .   |                             |        |        |        |         |         |   |
| 4488   | CB  | CB  | . ASN ASN ASN B B 160 160 . | 0.6027 | 0.6154 | 0.6319 | 0.0222  | -0.0266 | - |
| 0.0197 | 1   | .   |                             |        |        |        |         |         |   |
| 4489   | CG  | CG  | . ASN ASN ASN B B 160 160 . | 0.6257 | 0.6334 | 0.6817 | 0.0216  | -0.0436 | - |
| 0.0307 | 1   | .   |                             |        |        |        |         |         |   |
| 4490   | OD1 | OD1 | . ASN ASN ASN B B 160 160 . | 0.6122 | 0.6583 | 0.7293 | 0.0284  | -0.0792 | - |
| 0.0624 | 1   | .   |                             |        |        |        |         |         |   |
| 4491   | ND2 | ND2 | . ASN ASN ASN B B 160 160 . | 0.6305 | 0.6482 | 0.7099 | 0.0608  | -0.0673 | - |
| 0.0381 | 1   | .   |                             |        |        |        |         |         |   |
| 4492   | C   | C   | . ASN ASN ASN B B 160 160 . | 0.5944 | 0.6033 | 0.5987 | 0.0113  | -0.0255 | - |
| 0.0235 | 1   | .   |                             |        |        |        |         |         |   |
| 4493   | O   | O   | . ASN ASN ASN B B 160 160 . | 0.6003 | 0.6137 | 0.5926 | 0.0197  | -0.0435 | - |
| 0.0496 | 1   | .   |                             |        |        |        |         |         |   |
| 4494   | N   | N   | . LYS LYS LYS B B 161 161 . | 0.5644 | 0.5849 | 0.5807 | 0.0080  | -0.0304 | - |
| 0.0150 | 1   | .   |                             |        |        |        |         |         |   |
| 4495   | CA  | CA  | . LYS LYS LYS B B 161 161 . | 0.5554 | 0.5730 | 0.5776 | 0.0009  | -0.0288 | - |
| 0.0049 | 1   | .   |                             |        |        |        |         |         |   |
| 4496   | CB  | CB  | . LYS LYS LYS B B 161 161 . | 0.5508 | 0.5858 | 0.5912 | 0.0070  | -0.0219 | - |
| 0.0061 | 1   | .   |                             |        |        |        |         |         |   |
| 4497   | CG  | CG  | . LYS LYS LYS B B 161 161 . | 0.5665 | 0.5986 | 0.6103 | 0.0000  | -0.0231 | - |
| 0.0108 | 1   | .   |                             |        |        |        |         |         |   |
| 4498   | CD  | CD  | . LYS LYS LYS B B 161 161 . | 0.5675 | 0.6233 | 0.6870 | -0.0184 | -0.0053 | - |
| 0.0264 | 1   | .   |                             |        |        |        |         |         |   |
| 4499   | CE  | CE  | . LYS LYS LYS B B 161 161 . | 0.5921 | 0.6879 | 0.6911 | -0.0325 | 0.0062  | - |
| 0.0222 | 1   | .   |                             |        |        |        |         |         |   |
| 4500   | NZ  | NZ  | . LYS LYS LYS B B 161 161 . | 0.5510 | 0.7027 | 0.7135 | -0.0348 | 0.0594  | - |
| 0.0682 | 1   | .   |                             |        |        |        |         |         |   |
| 4501   | C   | C   | . LYS LYS LYS B B 161 161 . | 0.5342 | 0.5551 | 0.5612 | 0.0078  | -0.0304 | - |
| 0.0063 | 1   | .   |                             |        |        |        |         |         |   |
| 4502   | O   | O   | . LYS LYS LYS B B 161 161 . | 0.5234 | 0.5690 | 0.5542 | 0.0193  | -0.0456 | - |
| 0.0249 | 1   | .   |                             |        |        |        |         |         |   |
| 4503   | N   | N   | . LEU LEU LEU B B 162 162 . | 0.4804 | 0.5258 | 0.5285 | 0.0110  | -0.0380 | - |
| 0.0020 | 1   | .   |                             |        |        |        |         |         |   |
| 4504   | CA  | CA  | . LEU LEU LEU B B 162 162 . | 0.4435 | 0.4913 | 0.5020 | 0.0190  | -0.0291 | - |
| 0.0135 | 1   | .   |                             |        |        |        |         |         |   |
| 4505   | CB  | CB  | . LEU LEU LEU B B 162 162 . | 0.4405 | 0.4909 | 0.5073 | 0.0265  | -0.0397 | - |
| 0.0051 | 1   | .   |                             |        |        |        |         |         |   |
| 4506   | CG  | CG  | . LEU LEU LEU B B 162 162 . | 0.4420 | 0.4622 | 0.4890 | 0.0284  | -0.0212 | - |
| 0.0153 | 1   | .   |                             |        |        |        |         |         |   |
| 4507   | CD1 | CD1 | . LEU LEU LEU B B 162 162 . | 0.3492 | 0.4783 | 0.5092 | 0.0417  | -0.0263 | - |
| 0.0345 | 1   | .   |                             |        |        |        |         |         |   |
| 4508   | CD2 | CD2 | . LEU LEU LEU B B 162 162 . | 0.3779 | 0.4647 | 0.4876 | 0.0298  | -0.0561 | - |
| 0.0294 | 1   | .   |                             |        |        |        |         |         |   |
| 4509   | C   | C   | . LEU LEU LEU B B 162 162 . | 0.4240 | 0.4732 | 0.4776 | 0.0186  | -0.0257 | - |
| 0.0142 | 1   | .   |                             |        |        |        |         |         |   |
| 4510   | O   | O   | . LEU LEU LEU B B 162 162 . | 0.3556 | 0.4832 | 0.4757 | 0.0295  | -0.0411 | - |
| 0.0313 | 1   | .   |                             |        |        |        |         |         |   |
| 4511   | N   | N   | . ALA ALA ALA B B 163 163 . | 0.4027 | 0.4515 | 0.4519 | 0.0128  | -0.0215 | - |
| 0.0312 | 1   | .   |                             |        |        |        |         |         |   |
| 4512   | CA  | CA  | . ALA ALA ALA B B 163 163 . | 0.4086 | 0.4380 | 0.4365 | 0.0031  | -0.0134 | - |
| 0.0202 | 1   | .   |                             |        |        |        |         |         |   |

|        |     |     |                             |        |        |        |         |         |   |
|--------|-----|-----|-----------------------------|--------|--------|--------|---------|---------|---|
| 4513   | CB  | CB  | . ALA ALA ALA B B 163 163 . | 0.3952 | 0.4309 | 0.4247 | -0.0020 | -0.0147 | - |
| 0.0319 | 1   | .   |                             |        |        |        |         |         |   |
| 4514   | C   | C   | . ALA ALA ALA B B 163 163 . | 0.4058 | 0.4323 | 0.4280 | 0.0002  | -0.0138 | - |
| 0.0249 | 1   | .   |                             |        |        |        |         |         |   |
| 4515   | O   | O   | . ALA ALA ALA B B 163 163 . | 0.4323 | 0.4447 | 0.4170 | -0.0247 | -0.0049 | - |
| 0.0282 | 1   | .   |                             |        |        |        |         |         |   |
| 4516   | N   | N   | . MET MET MET B B 164 164 . | 0.3911 | 0.4288 | 0.4207 | 0.0031  | -0.0087 | - |
| 0.0202 | 1   | .   |                             |        |        |        |         |         |   |
| 4517   | CA  | CA  | . MET MET MET B B 164 164 . | 0.4125 | 0.4097 | 0.4152 | -0.0050 | 0.0116  | - |
| 0.0154 | 1   | .   |                             |        |        |        |         |         |   |
| 4518   | CB  | CB  | . MET MET MET B B 164 164 . | 0.4042 | 0.4090 | 0.4193 | -0.0016 | 0.0111  | - |
| 0.0196 | 1   | .   |                             |        |        |        |         |         |   |
| 4519   | CG  | CG  | . MET MET MET B B 164 164 . | 0.4151 | 0.4330 | 0.4380 | 0.0197  | 0.0174  | - |
| 0.0183 | 1   | .   |                             |        |        |        |         |         |   |
| 4520   | SD  | SD  | . MET MET MET B B 164 164 . | 0.4132 | 0.5067 | 0.5046 | 0.0101  | -0.0150 | - |
| 0.0581 | 1   | .   |                             |        |        |        |         |         |   |
| 4521   | CE  | CE  | . MET MET MET B B 164 164 . | 0.3706 | 0.4421 | 0.4672 | 0.0309  | -0.0067 | - |
| 0.0748 | 1   | .   |                             |        |        |        |         |         |   |
| 4522   | C   | C   | . MET MET MET B B 164 164 . | 0.4067 | 0.3910 | 0.3979 | 0.0079  | -0.0012 | - |
| 0.0098 | 1   | .   |                             |        |        |        |         |         |   |
| 4523   | O   | O   | . MET MET MET B B 164 164 . | 0.3888 | 0.3891 | 0.3996 | 0.0144  | -0.0012 | - |
| 0.0204 | 1   | .   |                             |        |        |        |         |         |   |
| 4524   | N   | N   | . GLN GLN GLN B B 165 165 . | 0.3843 | 0.3569 | 0.3779 | -0.0092 | 0.0014  | - |
| 0.0070 | 1   | .   |                             |        |        |        |         |         |   |
| 4525   | CA  | CA  | . GLN GLN GLN B B 165 165 . | 0.3866 | 0.3595 | 0.3786 | 0.0058  | -0.0080 | - |
| 0.0140 | 1   | .   |                             |        |        |        |         |         |   |
| 4526   | CB  | CB  | . GLN GLN GLN B B 165 165 . | 0.3740 | 0.3388 | 0.3765 | 0.0091  | -0.0075 | - |
| 0.0101 | 1   | .   |                             |        |        |        |         |         |   |
| 4527   | CG  | CG  | . GLN GLN GLN B B 165 165 . | 0.3959 | 0.3764 | 0.3824 | 0.0391  | -0.0080 | - |
| 0.0119 | 1   | .   |                             |        |        |        |         |         |   |
| 4528   | CD  | CD  | . GLN GLN GLN B B 165 165 . | 0.3875 | 0.3810 | 0.3442 | 0.0171  | -0.0118 | - |
| 0.0068 | 1   | .   |                             |        |        |        |         |         |   |
| 4529   | OE1 | OE1 | . GLN GLN GLN B B 165 165 . | 0.4195 | 0.4117 | 0.3222 | 0.0842  | -0.0451 | - |
| 0.0098 | 1   | .   |                             |        |        |        |         |         |   |
| 4530   | NE2 | NE2 | . GLN GLN GLN B B 165 165 . | 0.4058 | 0.3014 | 0.3784 | -0.0327 | 0.0443  | - |
| 0.0366 | 1   | .   |                             |        |        |        |         |         |   |
| 4531   | C   | C   | . GLN GLN GLN B B 165 165 . | 0.3862 | 0.3664 | 0.3686 | 0.0192  | -0.0137 | - |
| 0.0025 | 1   | .   |                             |        |        |        |         |         |   |
| 4532   | O   | O   | . GLN GLN GLN B B 165 165 . | 0.3744 | 0.3688 | 0.3513 | 0.0344  | -0.0359 | - |
| 0.0037 | 1   | .   |                             |        |        |        |         |         |   |
| 4533   | N   | N   | . GLU GLU GLU B B 166 166 . | 0.3761 | 0.3621 | 0.3716 | 0.0069  | -0.0172 | - |
| 0.0031 | 1   | .   |                             |        |        |        |         |         |   |
| 4534   | CA  | CA  | . GLU GLU GLU B B 166 166 . | 0.3657 | 0.3740 | 0.3688 | 0.0093  | -0.0065 | - |
| 0.0068 | 1   | .   |                             |        |        |        |         |         |   |
| 4535   | CB  | CB  | . GLU GLU GLU B B 166 166 . | 0.3526 | 0.3782 | 0.3638 | -0.0009 | -0.0006 | - |
| 0.0011 | 1   | .   |                             |        |        |        |         |         |   |
| 4536   | CG  | CG  | . GLU GLU GLU B B 166 166 . | 0.3931 | 0.3762 | 0.3749 | 0.0122  | -0.0040 | - |
| 0.0093 | 1   | .   |                             |        |        |        |         |         |   |
| 4537   | CD  | CD  | . GLU GLU GLU B B 166 166 . | 0.4134 | 0.3800 | 0.3956 | 0.0306  | 0.0319  | - |
| 0.0029 | 1   | .   |                             |        |        |        |         |         |   |
| 4538   | OE1 | OE1 | . GLU GLU GLU B B 166 166 . | 0.4090 | 0.3868 | 0.3444 | 0.0087  | -0.0213 | - |
| 0.0218 | 1   | .   |                             |        |        |        |         |         |   |
| 4539   | OE2 | OE2 | . GLU GLU GLU B B 166 166 . | 0.5672 | 0.3364 | 0.4063 | 0.0598  | 0.0744  | - |
| 0.0210 | 1   | .   |                             |        |        |        |         |         |   |
| 4540   | C   | C   | . GLU GLU GLU B B 166 166 . | 0.3588 | 0.3771 | 0.3649 | 0.0120  | -0.0088 | - |
| 0.0057 | 1   | .   |                             |        |        |        |         |         |   |
| 4541   | O   | O   | . GLU GLU GLU B B 166 166 . | 0.3544 | 0.3811 | 0.3580 | 0.0265  | -0.0144 | - |
| 0.0268 | 1   | .   |                             |        |        |        |         |         |   |
| 4542   | N   | N   | . PHE PHE PHE B B 167 167 . | 0.3501 | 0.3756 | 0.3566 | 0.0124  | -0.0147 | - |
| 0.0138 | 1   | .   |                             |        |        |        |         |         |   |



|        |     |     |                             |        |        |        |         |         |   |
|--------|-----|-----|-----------------------------|--------|--------|--------|---------|---------|---|
| 4573   | CD1 | CD1 | . LEU LEU LEU B B 170 170 . | 0.3870 | 0.3851 | 0.3953 | -0.0274 | 0.0263  |   |
| 0.0663 | 1   | .   |                             |        |        |        |         |         |   |
| 4574   | CD2 | CD2 | . LEU LEU LEU B B 170 170 . | 0.4632 | 0.4244 | 0.4321 | -0.0149 | -0.0679 |   |
| 0.0416 | 1   | .   |                             |        |        |        |         |         |   |
| 4575   | C   | C   | . LEU LEU LEU B B 170 170 . | 0.4139 | 0.3810 | 0.3874 | 0.0000  | 0.0210  |   |
| 0.0005 | 1   | .   |                             |        |        |        |         |         |   |
| 4576   | O   | O   | . LEU LEU LEU B B 170 170 . | 0.4211 | 0.3906 | 0.4006 | -0.0011 | 0.0270  | - |
| 0.0102 | 1   | .   |                             |        |        |        |         |         |   |
| 4577   | N   | N   | . PRO PRO PRO B B 171 171 . | 0.4345 | 0.3923 | 0.3872 | 0.0121  | 0.0192  |   |
| 0.0056 | 1   | .   |                             |        |        |        |         |         |   |
| 4578   | CA  | CA  | . PRO PRO PRO B B 171 171 . | 0.4317 | 0.3872 | 0.3844 | 0.0041  | 0.0142  | - |
| 0.0039 | 1   | .   |                             |        |        |        |         |         |   |
| 4579   | CB  | CB  | . PRO PRO PRO B B 171 171 . | 0.4236 | 0.3534 | 0.3747 | 0.0039  | 0.0141  |   |
| 0.0095 | 1   | .   |                             |        |        |        |         |         |   |
| 4580   | CG  | CG  | . PRO PRO PRO B B 171 171 . | 0.4553 | 0.3834 | 0.3428 | 0.0099  | 0.0291  |   |
| 0.0339 | 1   | .   |                             |        |        |        |         |         |   |
| 4581   | CD  | CD  | . PRO PRO PRO B B 171 171 . | 0.4237 | 0.3995 | 0.3726 | 0.0219  | 0.0259  |   |
| 0.0072 | 1   | .   |                             |        |        |        |         |         |   |
| 4582   | C   | C   | . PRO PRO PRO B B 171 171 . | 0.4277 | 0.3957 | 0.3896 | 0.0046  | 0.0085  | - |
| 0.0053 | 1   | .   |                             |        |        |        |         |         |   |
| 4583   | O   | O   | . PRO PRO PRO B B 171 171 . | 0.4423 | 0.3634 | 0.3769 | -0.0030 | 0.0040  | - |
| 0.0191 | 1   | .   |                             |        |        |        |         |         |   |
| 4584   | N   | N   | . VAL VAL VAL B B 172 172 . | 0.4308 | 0.4018 | 0.3917 | 0.0039  | 0.0117  |   |
| 0.0018 | 1   | .   |                             |        |        |        |         |         |   |
| 4585   | CA  | CA  | . VAL VAL VAL B B 172 172 . | 0.4336 | 0.4119 | 0.4005 | 0.0088  | 0.0155  |   |
| 0.0061 | 1   | .   |                             |        |        |        |         |         |   |
| 4586   | CB  | CB  | . VAL VAL VAL B B 172 172 . | 0.4327 | 0.4108 | 0.4137 | 0.0115  | 0.0199  |   |
| 0.0189 | 1   | .   |                             |        |        |        |         |         |   |
| 4587   | CG1 | CG1 | . VAL VAL VAL B B 172 172 . | 0.4656 | 0.4296 | 0.4053 | 0.0074  | 0.0328  |   |
| 0.0031 | 1   | .   |                             |        |        |        |         |         |   |
| 4588   | CG2 | CG2 | . VAL VAL VAL B B 172 172 . | 0.4620 | 0.4027 | 0.4266 | 0.0225  | 0.0436  |   |
| 0.0194 | 1   | .   |                             |        |        |        |         |         |   |
| 4589   | C   | C   | . VAL VAL VAL B B 172 172 . | 0.4262 | 0.4147 | 0.3863 | 0.0031  | 0.0145  | - |
| 0.0007 | 1   | .   |                             |        |        |        |         |         |   |
| 4590   | O   | O   | . VAL VAL VAL B B 172 172 . | 0.4134 | 0.4155 | 0.3545 | 0.0035  | 0.0307  | - |
| 0.0046 | 1   | .   |                             |        |        |        |         |         |   |
| 4591   | N   | N   | . GLY GLY GLY B B 173 173 . | 0.4323 | 0.4233 | 0.3964 | 0.0120  | 0.0143  | - |
| 0.0009 | 1   | .   |                             |        |        |        |         |         |   |
| 4592   | CA  | CA  | . GLY GLY GLY B B 173 173 . | 0.4525 | 0.4521 | 0.4238 | 0.0105  | 0.0071  | - |
| 0.0110 | 1   | .   |                             |        |        |        |         |         |   |
| 4593   | C   | C   | . GLY GLY GLY B B 173 173 . | 0.4760 | 0.4596 | 0.4518 | 0.0103  | 0.0030  | - |
| 0.0129 | 1   | .   |                             |        |        |        |         |         |   |
| 4594   | O   | O   | . GLY GLY GLY B B 173 173 . | 0.4995 | 0.4849 | 0.4521 | 0.0197  | 0.0046  | - |
| 0.0382 | 1   | .   |                             |        |        |        |         |         |   |
| 4595   | N   | N   | . ALA ALA ALA B B 174 174 . | 0.4807 | 0.4583 | 0.4389 | 0.0115  | 0.0110  | - |
| 0.0206 | 1   | .   |                             |        |        |        |         |         |   |
| 4596   | CA  | CA  | . ALA ALA ALA B B 174 174 . | 0.4938 | 0.4702 | 0.4529 | 0.0029  | 0.0071  | - |
| 0.0144 | 1   | .   |                             |        |        |        |         |         |   |
| 4597   | CB  | CB  | . ALA ALA ALA B B 174 174 . | 0.5036 | 0.4637 | 0.4632 | -0.0016 | 0.0111  | - |
| 0.0167 | 1   | .   |                             |        |        |        |         |         |   |
| 4598   | C   | C   | . ALA ALA ALA B B 174 174 . | 0.4961 | 0.4760 | 0.4602 | 0.0066  | 0.0078  | - |
| 0.0107 | 1   | .   |                             |        |        |        |         |         |   |
| 4599   | O   | O   | . ALA ALA ALA B B 174 174 . | 0.5180 | 0.4934 | 0.4535 | 0.0169  | 0.0009  | - |
| 0.0046 | 1   | .   |                             |        |        |        |         |         |   |
| 4600   | N   | N   | . GLU GLU GLU B B 175 175 . | 0.4947 | 0.4715 | 0.4716 | 0.0069  | 0.0105  | - |
| 0.0083 | 1   | .   |                             |        |        |        |         |         |   |
| 4601   | CA  | CA  | . GLU GLU GLU B B 175 175 . | 0.4892 | 0.4774 | 0.4778 | -0.0013 | 0.0183  | - |
| 0.0014 | 1   | .   |                             |        |        |        |         |         |   |
| 4602   | CB  | CB  | . GLU GLU GLU B B 175 175 . | 0.5111 | 0.4901 | 0.5077 | -0.0055 | 0.0240  | - |
| 0.0050 | 1   | .   |                             |        |        |        |         |         |   |





|        |     |     |                             |        |        |        |         |         |   |
|--------|-----|-----|-----------------------------|--------|--------|--------|---------|---------|---|
| 4633   | NH1 | NH1 | . ARG ARG ARG B B 178 178 . | 0.6619 | 0.7551 | 0.7439 | -0.0782 | -0.0675 |   |
| 0.0712 | 1   | .   |                             |        |        |        |         |         |   |
| 4634   | NH2 | NH2 | . ARG ARG ARG B B 178 178 . | 0.6613 | 0.7789 | 0.7201 | -0.0621 | -0.0809 |   |
| 0.0136 | 1   | .   |                             |        |        |        |         |         |   |
| 4635   | C   | C   | . ARG ARG ARG B B 178 178 . | 0.3549 | 0.3541 | 0.3453 | -0.0030 | 0.0196  |   |
| 0.0024 | 1   | .   |                             |        |        |        |         |         |   |
| 4636   | O   | O   | . ARG ARG ARG B B 178 178 . | 0.3664 | 0.3422 | 0.3127 | 0.0298  | 0.0115  |   |
| 0.0234 | 1   | .   |                             |        |        |        |         |         |   |
| 4637   | N   | N   | . ASP ASP ASP B B 179 179 . | 0.3440 | 0.3637 | 0.3616 | 0.0080  | 0.0090  | - |
| 0.0038 | 1   | .   |                             |        |        |        |         |         |   |
| 4638   | CA  | CA  | . ASP ASP ASP B B 179 179 . | 0.3538 | 0.3721 | 0.3561 | 0.0077  | 0.0102  | - |
| 0.0102 | 1   | .   |                             |        |        |        |         |         |   |
| 4639   | CB  | CB  | . ASP ASP ASP B B 179 179 . | 0.3627 | 0.3840 | 0.3699 | 0.0061  | 0.0070  | - |
| 0.0151 | 1   | .   |                             |        |        |        |         |         |   |
| 4640   | CG  | CG  | . ASP ASP ASP B B 179 179 . | 0.4191 | 0.4060 | 0.4234 | 0.0228  | -0.0072 | - |
| 0.0149 | 1   | .   |                             |        |        |        |         |         |   |
| 4641   | OD1 | OD1 | . ASP ASP ASP B B 179 179 . | 0.5172 | 0.4379 | 0.4776 | 0.0027  | -0.0513 |   |
| 0.0486 | 1   | .   |                             |        |        |        |         |         |   |
| 4642   | OD2 | OD2 | . ASP ASP ASP B B 179 179 . | 0.5277 | 0.4451 | 0.4397 | 0.0469  | -0.0141 |   |
| 0.0475 | 1   | .   |                             |        |        |        |         |         |   |
| 4643   | C   | C   | . ASP ASP ASP B B 179 179 . | 0.3434 | 0.3501 | 0.3418 | 0.0150  | 0.0111  | - |
| 0.0062 | 1   | .   |                             |        |        |        |         |         |   |
| 4644   | O   | O   | . ASP ASP ASP B B 179 179 . | 0.3214 | 0.3544 | 0.3145 | 0.0413  | 0.0102  | - |
| 0.0128 | 1   | .   |                             |        |        |        |         |         |   |
| 4645   | N   | N   | . ALA ALA ALA B B 180 180 . | 0.3353 | 0.3484 | 0.3463 | 0.0165  | -0.0039 |   |
| 0.0057 | 1   | .   |                             |        |        |        |         |         |   |
| 4646   | CA  | CA  | . ALA ALA ALA B B 180 180 . | 0.3427 | 0.3379 | 0.3414 | 0.0138  | -0.0013 | - |
| 0.0057 | 1   | .   |                             |        |        |        |         |         |   |
| 4647   | CB  | CB  | . ALA ALA ALA B B 180 180 . | 0.3736 | 0.3299 | 0.3514 | 0.0173  | -0.0059 | - |
| 0.0012 | 1   | .   |                             |        |        |        |         |         |   |
| 4648   | C   | C   | . ALA ALA ALA B B 180 180 . | 0.3371 | 0.3369 | 0.3455 | 0.0094  | 0.0074  | - |
| 0.0052 | 1   | .   |                             |        |        |        |         |         |   |
| 4649   | O   | O   | . ALA ALA ALA B B 180 180 . | 0.3040 | 0.3303 | 0.3335 | -0.0032 | 0.0316  | - |
| 0.0132 | 1   | .   |                             |        |        |        |         |         |   |
| 4650   | N   | N   | . MET MET MET B B 181 181 . | 0.3172 | 0.3393 | 0.3397 | 0.0178  | 0.0187  | - |
| 0.0023 | 1   | .   |                             |        |        |        |         |         |   |
| 4651   | CA  | CA  | . MET MET MET B B 181 181 . | 0.3222 | 0.3317 | 0.3345 | 0.0114  | 0.0078  | - |
| 0.0082 | 1   | .   |                             |        |        |        |         |         |   |
| 4652   | CB  | CB  | . MET MET MET B B 181 181 . | 0.3096 | 0.3353 | 0.3439 | 0.0098  | 0.0166  | - |
| 0.0194 | 1   | .   |                             |        |        |        |         |         |   |
| 4653   | CG  | CG  | . MET MET MET B B 181 181 . | 0.3055 | 0.2965 | 0.3211 | 0.0294  | 0.0100  | - |
| 0.0100 | 1   | .   |                             |        |        |        |         |         |   |
| 4654   | SD  | SD  | . MET MET MET B B 181 181 . | 0.4281 | 0.3948 | 0.4220 | 0.0286  | 0.0058  |   |
| 0.0069 | 1   | .   |                             |        |        |        |         |         |   |
| 4655   | CE  | CE  | . MET MET MET B B 181 181 . | 0.3859 | 0.2475 | 0.3163 | 0.0849  | -0.0057 |   |
| 0.0118 | 1   | .   |                             |        |        |        |         |         |   |
| 4656   | C   | C   | . MET MET MET B B 181 181 . | 0.3297 | 0.3500 | 0.3425 | 0.0084  | 0.0112  | - |
| 0.0095 | 1   | .   |                             |        |        |        |         |         |   |
| 4657   | O   | O   | . MET MET MET B B 181 181 . | 0.3426 | 0.3707 | 0.3447 | 0.0217  | 0.0199  | - |
| 0.0129 | 1   | .   |                             |        |        |        |         |         |   |
| 4658   | N   | N   | . ARG ARG ARG B B 182 182 . | 0.3568 | 0.3757 | 0.3335 | 0.0173  | 0.0068  | - |
| 0.0068 | 1   | .   |                             |        |        |        |         |         |   |
| 4659   | CA  | CA  | . ARG ARG ARG B B 182 182 . | 0.3756 | 0.3780 | 0.3364 | 0.0109  | -0.0033 |   |
| 0.0039 | 1   | .   |                             |        |        |        |         |         |   |
| 4660   | CB  | CB  | . ARG ARG ARG B B 182 182 . | 0.3858 | 0.3834 | 0.3379 | -0.0089 | 0.0020  |   |
| 0.0017 | 1   | .   |                             |        |        |        |         |         |   |
| 4661   | CG  | CG  | . ARG ARG ARG B B 182 182 . | 0.4419 | 0.4181 | 0.3836 | 0.0092  | -0.0239 |   |
| 0.0072 | 1   | .   |                             |        |        |        |         |         |   |
| 4662   | CD  | CD  | . ARG ARG ARG B B 182 182 . | 0.5588 | 0.4570 | 0.5071 | 0.0071  | -0.0096 |   |
| 0.0003 | 1   | .   |                             |        |        |        |         |         |   |



|        |     |     |                             |        |        |        |         |         |   |
|--------|-----|-----|-----------------------------|--------|--------|--------|---------|---------|---|
| 4693   | C   | C   | . GLU GLU GLU B B 186 186 . | 0.3642 | 0.3660 | 0.3595 | 0.0074  | 0.0048  | - |
| 0.0053 | 1   | .   |                             |        |        |        |         |         |   |
| 4694   | O   | O   | . GLU GLU GLU B B 186 186 . | 0.3344 | 0.3566 | 0.3616 | 0.0122  | 0.0074  | - |
| 0.0085 | 1   | .   |                             |        |        |        |         |         |   |
| 4695   | N   | N   | . VAL VAL VAL B B 187 187 . | 0.3524 | 0.3560 | 0.3577 | 0.0113  | 0.0137  | - |
| 0.0043 | 1   | .   |                             |        |        |        |         |         |   |
| 4696   | CA  | CA  | . VAL VAL VAL B B 187 187 . | 0.3187 | 0.3586 | 0.3485 | 0.0158  | 0.0218  | - |
| 0.0066 | 1   | .   |                             |        |        |        |         |         |   |
| 4697   | CB  | CB  | . VAL VAL VAL B B 187 187 . | 0.3080 | 0.3591 | 0.3555 | 0.0164  | 0.0219  | - |
| 0.0082 | 1   | .   |                             |        |        |        |         |         |   |
| 4698   | CG1 | CG1 | . VAL VAL VAL B B 187 187 . | 0.3099 | 0.3457 | 0.3302 | 0.0248  | 0.0128  |   |
| 0.0008 | 1   | .   |                             |        |        |        |         |         |   |
| 4699   | CG2 | CG2 | . VAL VAL VAL B B 187 187 . | 0.2333 | 0.3918 | 0.3383 | 0.0329  | 0.0395  | - |
| 0.0153 | 1   | .   |                             |        |        |        |         |         |   |
| 4700   | C   | C   | . VAL VAL VAL B B 187 187 . | 0.3229 | 0.3600 | 0.3705 | 0.0066  | 0.0182  | - |
| 0.0018 | 1   | .   |                             |        |        |        |         |         |   |
| 4701   | O   | O   | . VAL VAL VAL B B 187 187 . | 0.2850 | 0.3658 | 0.3975 | 0.0196  | 0.0311  |   |
| 0.0042 | 1   | .   |                             |        |        |        |         |         |   |
| 4702   | N   | N   | . TYR TYR TYR B B 188 188 . | 0.3091 | 0.3503 | 0.3536 | 0.0139  | 0.0234  | - |
| 0.0091 | 1   | .   |                             |        |        |        |         |         |   |
| 4703   | CA  | CA  | . TYR TYR TYR B B 188 188 . | 0.3174 | 0.3590 | 0.3561 | 0.0130  | 0.0149  | - |
| 0.0083 | 1   | .   |                             |        |        |        |         |         |   |
| 4704   | CB  | CB  | . TYR TYR TYR B B 188 188 . | 0.3005 | 0.3649 | 0.3486 | -0.0043 | 0.0140  | - |
| 0.0146 | 1   | .   |                             |        |        |        |         |         |   |
| 4705   | CG  | CG  | . TYR TYR TYR B B 188 188 . | 0.2712 | 0.3375 | 0.3303 | 0.0021  | 0.0085  | - |
| 0.0127 | 1   | .   |                             |        |        |        |         |         |   |
| 4706   | CD1 | CD1 | . TYR TYR TYR B B 188 188 . | 0.2813 | 0.3571 | 0.3217 | 0.0139  | 0.0049  | - |
| 0.0080 | 1   | .   |                             |        |        |        |         |         |   |
| 4707   | CE1 | CE1 | . TYR TYR TYR B B 188 188 . | 0.2737 | 0.3713 | 0.3323 | 0.0198  | -0.0109 | - |
| 0.0370 | 1   | .   |                             |        |        |        |         |         |   |
| 4708   | CZ  | CZ  | . TYR TYR TYR B B 188 188 . | 0.2733 | 0.3543 | 0.3461 | 0.0050  | 0.0029  | - |
| 0.0420 | 1   | .   |                             |        |        |        |         |         |   |
| 4709   | OH  | OH  | . TYR TYR TYR B B 188 188 . | 0.2459 | 0.4330 | 0.3755 | 0.0096  | 0.0262  | - |
| 0.0853 | 1   | .   |                             |        |        |        |         |         |   |
| 4710   | CE2 | CE2 | . TYR TYR TYR B B 188 188 . | 0.2380 | 0.3600 | 0.3548 | 0.0149  | -0.0304 | - |
| 0.0094 | 1   | .   |                             |        |        |        |         |         |   |
| 4711   | CD2 | CD2 | . TYR TYR TYR B B 188 188 . | 0.2394 | 0.3294 | 0.3350 | -0.0174 | 0.0012  | - |
| 0.0204 | 1   | .   |                             |        |        |        |         |         |   |
| 4712   | C   | C   | . TYR TYR TYR B B 188 188 . | 0.3297 | 0.3727 | 0.3583 | 0.0119  | 0.0162  | - |
| 0.0104 | 1   | .   |                             |        |        |        |         |         |   |
| 4713   | O   | O   | . TYR TYR TYR B B 188 188 . | 0.3589 | 0.3870 | 0.3675 | 0.0239  | 0.0162  | - |
| 0.0268 | 1   | .   |                             |        |        |        |         |         |   |
| 4714   | N   | N   | . HIS HIS HIS B B 189 189 . | 0.3265 | 0.3642 | 0.3570 | 0.0182  | 0.0197  | - |
| 0.0095 | 1   | .   |                             |        |        |        |         |         |   |
| 4715   | CA  | CA  | . HIS HIS HIS B B 189 189 . | 0.3497 | 0.3831 | 0.3691 | 0.0055  | 0.0062  | - |
| 0.0073 | 1   | .   |                             |        |        |        |         |         |   |
| 4716   | CB  | CB  | . HIS HIS HIS B B 189 189 . | 0.3432 | 0.3984 | 0.3849 | -0.0025 | 0.0023  |   |
| 0.0054 | 1   | .   |                             |        |        |        |         |         |   |
| 4717   | CG  | CG  | . HIS HIS HIS B B 189 189 . | 0.4114 | 0.4382 | 0.3908 | -0.0130 | 0.0090  | - |
| 0.0037 | 1   | .   |                             |        |        |        |         |         |   |
| 4718   | ND1 | ND1 | . HIS HIS HIS B B 189 189 . | 0.4896 | 0.5089 | 0.4313 | -0.0413 | -0.0075 | - |
| 0.0042 | 1   | .   |                             |        |        |        |         |         |   |
| 4719   | CE1 | CE1 | . HIS HIS HIS B B 189 189 . | 0.4698 | 0.5207 | 0.4330 | -0.0421 | -0.0162 | - |
| 0.0070 | 1   | .   |                             |        |        |        |         |         |   |
| 4720   | NE2 | NE2 | . HIS HIS HIS B B 189 189 . | 0.4349 | 0.5037 | 0.4306 | -0.0228 | -0.0275 |   |
| 0.0182 | 1   | .   |                             |        |        |        |         |         |   |
| 4721   | CD2 | CD2 | . HIS HIS HIS B B 189 189 . | 0.4066 | 0.4657 | 0.4124 | -0.0267 | -0.0209 |   |
| 0.0009 | 1   | .   |                             |        |        |        |         |         |   |
| 4722   | C   | C   | . HIS HIS HIS B B 189 189 . | 0.3401 | 0.3851 | 0.3727 | -0.0038 | 0.0011  | - |
| 0.0053 | 1   | .   |                             |        |        |        |         |         |   |



|        |     |     |                             |        |        |        |         |         |   |
|--------|-----|-----|-----------------------------|--------|--------|--------|---------|---------|---|
| 4753   | CA  | CA  | . VAL VAL VAL B B 194 194 . | 0.4709 | 0.4851 | 0.4894 | 0.0095  | 0.0226  |   |
| 0.0082 | 1   | .   |                             |        |        |        |         |         |   |
| 4754   | CB  | CB  | . VAL VAL VAL B B 194 194 . | 0.4742 | 0.4881 | 0.4968 | 0.0093  | 0.0265  |   |
| 0.0119 | 1   | .   |                             |        |        |        |         |         |   |
| 4755   | CG1 | CG1 | . VAL VAL VAL B B 194 194 . | 0.4838 | 0.4975 | 0.4940 | 0.0259  | 0.0547  |   |
| 0.0275 | 1   | .   |                             |        |        |        |         |         |   |
| 4756   | CG2 | CG2 | . VAL VAL VAL B B 194 194 . | 0.4657 | 0.4903 | 0.5076 | 0.0236  | 0.0446  |   |
| 0.0012 | 1   | .   |                             |        |        |        |         |         |   |
| 4757   | C   | C   | . VAL VAL VAL B B 194 194 . | 0.4720 | 0.4834 | 0.5007 | 0.0107  | 0.0246  |   |
| 0.0065 | 1   | .   |                             |        |        |        |         |         |   |
| 4758   | O   | O   | . VAL VAL VAL B B 194 194 . | 0.4835 | 0.4974 | 0.5292 | 0.0102  | 0.0423  |   |
| 0.0186 | 1   | .   |                             |        |        |        |         |         |   |
| 4759   | N   | N   | . ILE ILE ILE B B 195 195 . | 0.4551 | 0.4707 | 0.4833 | 0.0138  | 0.0260  |   |
| 0.0053 | 1   | .   |                             |        |        |        |         |         |   |
| 4760   | CA  | CA  | . ILE ILE ILE B B 195 195 . | 0.4379 | 0.4542 | 0.4609 | 0.0194  | 0.0213  | - |
| 0.0081 | 1   | .   |                             |        |        |        |         |         |   |
| 4761   | CB  | CB  | . ILE ILE ILE B B 195 195 . | 0.4194 | 0.4461 | 0.4613 | 0.0163  | 0.0166  | - |
| 0.0116 | 1   | .   |                             |        |        |        |         |         |   |
| 4762   | CG1 | CG1 | . ILE ILE ILE B B 195 195 . | 0.4177 | 0.4407 | 0.4349 | 0.0311  | 0.0134  | - |
| 0.0302 | 1   | .   |                             |        |        |        |         |         |   |
| 4763   | CD1 | CD1 | . ILE ILE ILE B B 195 195 . | 0.3851 | 0.3908 | 0.4176 | -0.0125 | -0.0046 | - |
| 0.0706 | 1   | .   |                             |        |        |        |         |         |   |
| 4764   | CG2 | CG2 | . ILE ILE ILE B B 195 195 . | 0.3595 | 0.4004 | 0.4091 | 0.0805  | 0.0562  | - |
| 0.0262 | 1   | .   |                             |        |        |        |         |         |   |
| 4765   | C   | C   | . ILE ILE ILE B B 195 195 . | 0.4438 | 0.4644 | 0.4743 | 0.0166  | 0.0189  | - |
| 0.0057 | 1   | .   |                             |        |        |        |         |         |   |
| 4766   | O   | O   | . ILE ILE ILE B B 195 195 . | 0.4490 | 0.4694 | 0.4728 | 0.0148  | 0.0246  | - |
| 0.0131 | 1   | .   |                             |        |        |        |         |         |   |
| 4767   | N   | N   | . LYS LYS LYS B B 196 196 . | 0.4450 | 0.4756 | 0.4715 | 0.0132  | 0.0256  | - |
| 0.0046 | 1   | .   |                             |        |        |        |         |         |   |
| 4768   | CA  | CA  | . LYS LYS LYS B B 196 196 . | 0.4539 | 0.4917 | 0.4940 | 0.0136  | 0.0116  |   |
| 0.0011 | 1   | .   |                             |        |        |        |         |         |   |
| 4769   | CB  | CB  | . LYS LYS LYS B B 196 196 . | 0.4488 | 0.4935 | 0.4967 | 0.0105  | 0.0143  |   |
| 0.0008 | 1   | .   |                             |        |        |        |         |         |   |
| 4770   | CG  | CG  | . LYS LYS LYS B B 196 196 . | 0.5279 | 0.5287 | 0.5098 | 0.0030  | 0.0027  | - |
| 0.0092 | 1   | .   |                             |        |        |        |         |         |   |
| 4771   | CD  | CD  | . LYS LYS LYS B B 196 196 . | 0.6252 | 0.6195 | 0.5720 | -0.0059 | -0.0010 |   |
| 0.0352 | 1   | .   |                             |        |        |        |         |         |   |
| 4772   | CE  | CE  | . LYS LYS LYS B B 196 196 . | 0.6974 | 0.7032 | 0.6211 | -0.0065 | 0.0167  |   |
| 0.0257 | 1   | .   |                             |        |        |        |         |         |   |
| 4773   | NZ  | NZ  | . LYS LYS LYS B B 196 196 . | 0.7379 | 0.7315 | 0.6746 | -0.0007 | 0.0019  |   |
| 0.0591 | 1   | .   |                             |        |        |        |         |         |   |
| 4774   | C   | C   | . LYS LYS LYS B B 196 196 . | 0.4690 | 0.5009 | 0.5120 | 0.0056  | 0.0059  |   |
| 0.0062 | 1   | .   |                             |        |        |        |         |         |   |
| 4775   | O   | O   | . LYS LYS LYS B B 196 196 . | 0.4226 | 0.4978 | 0.5171 | 0.0138  | -0.0002 |   |
| 0.0229 | 1   | .   |                             |        |        |        |         |         |   |
| 4776   | N   | N   | . ASP ASP ASP B B 197 197 . | 0.4986 | 0.5242 | 0.5272 | 0.0067  | 0.0110  |   |
| 0.0063 | 1   | .   |                             |        |        |        |         |         |   |
| 4777   | CA  | CA  | . ASP ASP ASP B B 197 197 . | 0.5295 | 0.5435 | 0.5532 | 0.0007  | 0.0024  |   |
| 0.0055 | 1   | .   |                             |        |        |        |         |         |   |
| 4778   | CB  | CB  | . ASP ASP ASP B B 197 197 . | 0.5571 | 0.5563 | 0.5704 | 0.0051  | 0.0004  | - |
| 0.0002 | 1   | .   |                             |        |        |        |         |         |   |
| 4779   | CG  | CG  | . ASP ASP ASP B B 197 197 . | 0.6110 | 0.5943 | 0.5864 | 0.0081  | 0.0013  |   |
| 0.0089 | 1   | .   |                             |        |        |        |         |         |   |
| 4780   | OD1 | OD1 | . ASP ASP ASP B B 197 197 . | 0.6556 | 0.5778 | 0.5667 | 0.0306  | 0.0162  | - |
| 0.0103 | 1   | .   |                             |        |        |        |         |         |   |
| 4781   | OD2 | OD2 | . ASP ASP ASP B B 197 197 . | 0.7150 | 0.7004 | 0.5955 | 0.0330  | -0.0420 |   |
| 0.0007 | 1   | .   |                             |        |        |        |         |         |   |
| 4782   | C   | C   | . ASP ASP ASP B B 197 197 . | 0.5290 | 0.5403 | 0.5582 | 0.0003  | 0.0006  |   |
| 0.0133 | 1   | .   |                             |        |        |        |         |         |   |

|        |     |     |                             |        |        |        |         |         |   |
|--------|-----|-----|-----------------------------|--------|--------|--------|---------|---------|---|
| 4783   | O   | O   | . ASP ASP ASP B B 197 197 . | 0.5063 | 0.5331 | 0.5615 | 0.0025  | 0.0014  |   |
| 0.0170 | 1   | .   |                             |        |        |        |         |         |   |
| 4784   | N   | N   | . LYS LYS LYS B B 198 198 . | 0.5282 | 0.5436 | 0.5551 | 0.0018  | -0.0004 |   |
| 0.0109 | 1   | .   |                             |        |        |        |         |         |   |
| 4785   | CA  | CA  | . LYS LYS LYS B B 198 198 . | 0.5242 | 0.5355 | 0.5518 | 0.0044  | -0.0009 |   |
| 0.0071 | 1   | .   |                             |        |        |        |         |         |   |
| 4786   | CB  | CB  | . LYS LYS LYS B B 198 198 . | 0.5275 | 0.5418 | 0.5548 | 0.0019  | 0.0001  |   |
| 0.0075 | 1   | .   |                             |        |        |        |         |         |   |
| 4787   | CG  | CG  | . LYS LYS LYS B B 198 198 . | 0.4929 | 0.5450 | 0.5700 | -0.0073 | 0.0127  |   |
| 0.0114 | 1   | .   |                             |        |        |        |         |         |   |
| 4788   | CD  | CD  | . LYS LYS LYS B B 198 198 . | 0.4697 | 0.5756 | 0.5753 | -0.0206 | -0.0043 |   |
| 0.0069 | 1   | .   |                             |        |        |        |         |         |   |
| 4789   | CE  | CE  | . LYS LYS LYS B B 198 198 . | 0.4437 | 0.5840 | 0.6300 | -0.0337 | 0.0024  | - |
| 0.0001 | 1   | .   |                             |        |        |        |         |         |   |
| 4790   | NZ  | NZ  | . LYS LYS LYS B B 198 198 . | 0.4493 | 0.6001 | 0.6566 | -0.0398 | 0.0170  |   |
| 0.0154 | 1   | .   |                             |        |        |        |         |         |   |
| 4791   | C   | C   | . LYS LYS LYS B B 198 198 . | 0.5276 | 0.5365 | 0.5501 | 0.0047  | -0.0026 |   |
| 0.0059 | 1   | .   |                             |        |        |        |         |         |   |
| 4792   | O   | O   | . LYS LYS LYS B B 198 198 . | 0.5361 | 0.5235 | 0.5575 | 0.0017  | 0.0049  |   |
| 0.0080 | 1   | .   |                             |        |        |        |         |         |   |
| 4793   | N   | N   | . TYR TYR TYR B B 199 199 . | 0.5126 | 0.5312 | 0.5380 | 0.0117  | -0.0027 |   |
| 0.0051 | 1   | .   |                             |        |        |        |         |         |   |
| 4794   | CA  | CA  | . TYR TYR TYR B B 199 199 . | 0.5125 | 0.5437 | 0.5385 | 0.0086  | -0.0061 |   |
| 0.0009 | 1   | .   |                             |        |        |        |         |         |   |
| 4795   | CB  | CB  | . TYR TYR TYR B B 199 199 . | 0.5088 | 0.5450 | 0.5434 | 0.0075  | -0.0073 |   |
| 0.0044 | 1   | .   |                             |        |        |        |         |         |   |
| 4796   | CG  | CG  | . TYR TYR TYR B B 199 199 . | 0.5195 | 0.5591 | 0.5417 | 0.0075  | -0.0081 | - |
| 0.0051 | 1   | .   |                             |        |        |        |         |         |   |
| 4797   | CD1 | CD1 | . TYR TYR TYR B B 199 199 . | 0.5192 | 0.5774 | 0.5501 | 0.0173  | -0.0040 | - |
| 0.0111 | 1   | .   |                             |        |        |        |         |         |   |
| 4798   | CE1 | CE1 | . TYR TYR TYR B B 199 199 . | 0.5106 | 0.5447 | 0.5245 | 0.0232  | -0.0379 | - |
| 0.0131 | 1   | .   |                             |        |        |        |         |         |   |
| 4799   | CZ  | CZ  | . TYR TYR TYR B B 199 199 . | 0.4823 | 0.5355 | 0.5176 | 0.0443  | -0.0009 |   |
| 0.0028 | 1   | .   |                             |        |        |        |         |         |   |
| 4800   | OH  | OH  | . TYR TYR TYR B B 199 199 . | 0.4532 | 0.5233 | 0.5670 | 0.0859  | -0.0294 |   |
| 0.0200 | 1   | .   |                             |        |        |        |         |         |   |
| 4801   | CE2 | CE2 | . TYR TYR TYR B B 199 199 . | 0.5042 | 0.5154 | 0.5178 | 0.0333  | 0.0030  |   |
| 0.0080 | 1   | .   |                             |        |        |        |         |         |   |
| 4802   | CD2 | CD2 | . TYR TYR TYR B B 199 199 . | 0.5423 | 0.5439 | 0.5549 | 0.0220  | -0.0068 |   |
| 0.0017 | 1   | .   |                             |        |        |        |         |         |   |
| 4803   | C   | C   | . TYR TYR TYR B B 199 199 . | 0.4977 | 0.5424 | 0.5342 | 0.0066  | -0.0031 | - |
| 0.0019 | 1   | .   |                             |        |        |        |         |         |   |
| 4804   | O   | O   | . TYR TYR TYR B B 199 199 . | 0.4910 | 0.5410 | 0.5203 | 0.0122  | -0.0022 | - |
| 0.0173 | 1   | .   |                             |        |        |        |         |         |   |
| 4805   | N   | N   | . GLY GLY GLY B B 200 200 . | 0.4862 | 0.5577 | 0.5349 | 0.0011  | 0.0027  |   |
| 0.0013 | 1   | .   |                             |        |        |        |         |         |   |
| 4806   | CA  | CA  | . GLY GLY GLY B B 200 200 . | 0.4979 | 0.5671 | 0.5448 | 0.0052  | -0.0027 |   |
| 0.0108 | 1   | .   |                             |        |        |        |         |         |   |
| 4807   | C   | C   | . GLY GLY GLY B B 200 200 . | 0.5220 | 0.5704 | 0.5532 | 0.0010  | 0.0019  |   |
| 0.0091 | 1   | .   |                             |        |        |        |         |         |   |
| 4808   | O   | O   | . GLY GLY GLY B B 200 200 . | 0.5207 | 0.5754 | 0.5650 | -0.0032 | 0.0149  |   |
| 0.0102 | 1   | .   |                             |        |        |        |         |         |   |
| 4809   | N   | N   | . LYS LYS LYS B B 201 201 . | 0.5293 | 0.5745 | 0.5565 | 0.0013  | 0.0012  |   |
| 0.0076 | 1   | .   |                             |        |        |        |         |         |   |
| 4810   | CA  | CA  | . LYS LYS LYS B B 201 201 . | 0.5545 | 0.5756 | 0.5691 | -0.0052 | 0.0004  |   |
| 0.0047 | 1   | .   |                             |        |        |        |         |         |   |
| 4811   | CB  | CB  | . LYS LYS LYS B B 201 201 . | 0.5604 | 0.5845 | 0.5660 | -0.0059 | 0.0013  |   |
| 0.0023 | 1   | .   |                             |        |        |        |         |         |   |
| 4812   | CG  | CG  | . LYS LYS LYS B B 201 201 . | 0.5824 | 0.6101 | 0.6095 | -0.0147 | -0.0104 | - |
| 0.0057 | 1   | .   |                             |        |        |        |         |         |   |







|        |     |     |                             |        |        |        |         |         |   |
|--------|-----|-----|-----------------------------|--------|--------|--------|---------|---------|---|
| 4873   | O   | O   | . GLU GLU GLU B B 209 209 . | 0.3880 | 0.4023 | 0.3761 | -0.0241 | 0.0203  |   |
| 0.0115 | 1   | .   |                             |        |        |        |         |         |   |
| 4874   | N   | N   | . GLY GLY GLY B B 210 210 . | 0.3435 | 0.3859 | 0.3501 | -0.0086 | 0.0341  |   |
| 0.0206 | 1   | .   |                             |        |        |        |         |         |   |
| 4875   | CA  | CA  | . GLY GLY GLY B B 210 210 . | 0.3549 | 0.3746 | 0.3648 | 0.0038  | 0.0446  |   |
| 0.0216 | 1   | .   |                             |        |        |        |         |         |   |
| 4876   | C   | C   | . GLY GLY GLY B B 210 210 . | 0.3768 | 0.3960 | 0.3824 | 0.0082  | 0.0368  |   |
| 0.0118 | 1   | .   |                             |        |        |        |         |         |   |
| 4877   | O   | O   | . GLY GLY GLY B B 210 210 . | 0.3699 | 0.3951 | 0.3845 | 0.0025  | 0.0534  |   |
| 0.0014 | 1   | .   |                             |        |        |        |         |         |   |
| 4878   | N   | N   | . GLY GLY GLY B B 211 211 . | 0.3596 | 0.3843 | 0.3761 | -0.0034 | 0.0428  |   |
| 0.0085 | 1   | .   |                             |        |        |        |         |         |   |
| 4879   | CA  | CA  | . GLY GLY GLY B B 211 211 . | 0.3604 | 0.3952 | 0.3834 | 0.0000  | 0.0206  | - |
| 0.0027 | 1   | .   |                             |        |        |        |         |         |   |
| 4880   | C   | C   | . GLY GLY GLY B B 211 211 . | 0.3336 | 0.4096 | 0.3634 | 0.0059  | 0.0082  | - |
| 0.0082 | 1   | .   |                             |        |        |        |         |         |   |
| 4881   | O   | O   | . GLY GLY GLY B B 211 211 . | 0.2898 | 0.4229 | 0.3610 | 0.0196  | 0.0285  | - |
| 0.0087 | 1   | .   |                             |        |        |        |         |         |   |
| 4882   | N   | N   | . PHE PHE PHE B B 212 212 . | 0.3502 | 0.4059 | 0.3520 | 0.0276  | 0.0016  | - |
| 0.0174 | 1   | .   |                             |        |        |        |         |         |   |
| 4883   | CA  | CA  | . PHE PHE PHE B B 212 212 . | 0.3559 | 0.4057 | 0.3921 | 0.0228  | 0.0076  | - |
| 0.0198 | 1   | .   |                             |        |        |        |         |         |   |
| 4884   | CB  | CB  | . PHE PHE PHE B B 212 212 . | 0.3684 | 0.3878 | 0.3858 | 0.0315  | 0.0091  | - |
| 0.0180 | 1   | .   |                             |        |        |        |         |         |   |
| 4885   | CG  | CG  | . PHE PHE PHE B B 212 212 . | 0.3529 | 0.4145 | 0.4023 | 0.0298  | 0.0253  | - |
| 0.0008 | 1   | .   |                             |        |        |        |         |         |   |
| 4886   | CD1 | CD1 | . PHE PHE PHE B B 212 212 . | 0.2916 | 0.4302 | 0.3888 | 0.0198  | -0.0124 |   |
| 0.0073 | 1   | .   |                             |        |        |        |         |         |   |
| 4887   | CE1 | CE1 | . PHE PHE PHE B B 212 212 . | 0.2168 | 0.4158 | 0.3921 | 0.0440  | 0.0135  |   |
| 0.0377 | 1   | .   |                             |        |        |        |         |         |   |
| 4888   | CZ  | CZ  | . PHE PHE PHE B B 212 212 . | 0.2185 | 0.4211 | 0.4086 | 0.1052  | -0.0204 |   |
| 0.0153 | 1   | .   |                             |        |        |        |         |         |   |
| 4889   | CE2 | CE2 | . PHE PHE PHE B B 212 212 . | 0.2580 | 0.4003 | 0.4167 | 0.0700  | 0.0166  | - |
| 0.0097 | 1   | .   |                             |        |        |        |         |         |   |
| 4890   | CD2 | CD2 | . PHE PHE PHE B B 212 212 . | 0.3526 | 0.4338 | 0.3999 | 0.0611  | 0.0166  |   |
| 0.0105 | 1   | .   |                             |        |        |        |         |         |   |
| 4891   | C   | C   | . PHE PHE PHE B B 212 212 . | 0.3744 | 0.4162 | 0.4037 | 0.0353  | -0.0006 | - |
| 0.0260 | 1   | .   |                             |        |        |        |         |         |   |
| 4892   | O   | O   | . PHE PHE PHE B B 212 212 . | 0.3819 | 0.4169 | 0.4012 | 0.0430  | -0.0166 | - |
| 0.0439 | 1   | .   |                             |        |        |        |         |         |   |
| 4893   | N   | N   | . ALA ALA ALA B B 213 213 . | 0.4038 | 0.4475 | 0.4501 | 0.0284  | -0.0071 | - |
| 0.0320 | 1   | .   |                             |        |        |        |         |         |   |
| 4894   | CA  | CA  | . ALA ALA ALA B B 213 213 . | 0.4237 | 0.4815 | 0.4812 | 0.0168  | -0.0082 | - |
| 0.0263 | 1   | .   |                             |        |        |        |         |         |   |
| 4895   | CB  | CB  | . ALA ALA ALA B B 213 213 . | 0.4095 | 0.4797 | 0.4822 | 0.0204  | -0.0179 | - |
| 0.0327 | 1   | .   |                             |        |        |        |         |         |   |
| 4896   | C   | C   | . ALA ALA ALA B B 213 213 . | 0.4597 | 0.5194 | 0.5110 | 0.0187  | -0.0098 | - |
| 0.0331 | 1   | .   |                             |        |        |        |         |         |   |
| 4897   | O   | O   | . ALA ALA ALA B B 213 213 . | 0.4218 | 0.5523 | 0.5386 | 0.0246  | -0.0173 | - |
| 0.0423 | 1   | .   |                             |        |        |        |         |         |   |
| 4898   | N   | N   | . PRO PRO PRO B B 214 214 . | 0.5070 | 0.5423 | 0.5252 | 0.0152  | -0.0070 | - |
| 0.0252 | 1   | .   |                             |        |        |        |         |         |   |
| 4899   | CA  | CA  | . PRO PRO PRO B B 214 214 . | 0.5319 | 0.5514 | 0.5411 | 0.0113  | -0.0082 | - |
| 0.0206 | 1   | .   |                             |        |        |        |         |         |   |
| 4900   | CB  | CB  | . PRO PRO PRO B B 214 214 . | 0.5357 | 0.5542 | 0.5371 | 0.0106  | -0.0049 | - |
| 0.0194 | 1   | .   |                             |        |        |        |         |         |   |
| 4901   | CG  | CG  | . PRO PRO PRO B B 214 214 . | 0.5354 | 0.5321 | 0.5110 | 0.0095  | -0.0068 | - |
| 0.0272 | 1   | .   |                             |        |        |        |         |         |   |
| 4902   | CD  | CD  | . PRO PRO PRO B B 214 214 . | 0.5172 | 0.5274 | 0.5254 | 0.0148  | -0.0062 | - |
| 0.0290 | 1   | .   |                             |        |        |        |         |         |   |











|        |     |     |                             |        |        |        |         |         |   |
|--------|-----|-----|-----------------------------|--------|--------|--------|---------|---------|---|
| 5053   | C   | C   | . GLY GLY GLY B B 234 234 . | 0.4922 | 0.4888 | 0.5043 | 0.0076  | 0.0080  |   |
| 0.0017 | 1   | .   |                             |        |        |        |         |         |   |
| 5054   | O   | O   | . GLY GLY GLY B B 234 234 . | 0.5024 | 0.4928 | 0.5167 | 0.0018  | 0.0049  | - |
| 0.0123 | 1   | .   |                             |        |        |        |         |         |   |
| 5055   | N   | N   | . TYR TYR TYR B B 235 235 . | 0.4698 | 0.4650 | 0.4830 | 0.0232  | 0.0145  |   |
| 0.0046 | 1   | .   |                             |        |        |        |         |         |   |
| 5056   | CA  | CA  | . TYR TYR TYR B B 235 235 . | 0.4558 | 0.4568 | 0.4538 | 0.0124  | 0.0167  |   |
| 0.0002 | 1   | .   |                             |        |        |        |         |         |   |
| 5057   | CB  | CB  | . TYR TYR TYR B B 235 235 . | 0.4595 | 0.4602 | 0.4558 | 0.0137  | 0.0208  |   |
| 0.0075 | 1   | .   |                             |        |        |        |         |         |   |
| 5058   | CG  | CG  | . TYR TYR TYR B B 235 235 . | 0.4528 | 0.4566 | 0.4762 | 0.0261  | 0.0109  |   |
| 0.0013 | 1   | .   |                             |        |        |        |         |         |   |
| 5059   | CD1 | CD1 | . TYR TYR TYR B B 235 235 . | 0.4575 | 0.4444 | 0.4681 | 0.0421  | -0.0088 |   |
| 0.0046 | 1   | .   |                             |        |        |        |         |         |   |
| 5060   | CE1 | CE1 | . TYR TYR TYR B B 235 235 . | 0.4625 | 0.4677 | 0.4676 | 0.0183  | -0.0158 |   |
| 0.0195 | 1   | .   |                             |        |        |        |         |         |   |
| 5061   | CZ  | CZ  | . TYR TYR TYR B B 235 235 . | 0.4849 | 0.4662 | 0.4550 | 0.0224  | -0.0028 | - |
| 0.0073 | 1   | .   |                             |        |        |        |         |         |   |
| 5062   | OH  | OH  | . TYR TYR TYR B B 235 235 . | 0.4898 | 0.4431 | 0.4948 | 0.0105  | -0.0012 | - |
| 0.0211 | 1   | .   |                             |        |        |        |         |         |   |
| 5063   | CE2 | CE2 | . TYR TYR TYR B B 235 235 . | 0.4780 | 0.4919 | 0.4801 | 0.0300  | -0.0120 |   |
| 0.0125 | 1   | .   |                             |        |        |        |         |         |   |
| 5064   | CD2 | CD2 | . TYR TYR TYR B B 235 235 . | 0.4416 | 0.4559 | 0.5076 | 0.0307  | 0.0028  |   |
| 0.0014 | 1   | .   |                             |        |        |        |         |         |   |
| 5065   | C   | C   | . TYR TYR TYR B B 235 235 . | 0.4448 | 0.4632 | 0.4341 | 0.0174  | 0.0139  | - |
| 0.0014 | 1   | .   |                             |        |        |        |         |         |   |
| 5066   | O   | O   | . TYR TYR TYR B B 235 235 . | 0.3987 | 0.4570 | 0.4073 | 0.0262  | 0.0458  | - |
| 0.0051 | 1   | .   |                             |        |        |        |         |         |   |
| 5067   | N   | N   | . THR THR THR B B 236 236 . | 0.4339 | 0.4576 | 0.4373 | 0.0129  | 0.0143  | - |
| 0.0048 | 1   | .   |                             |        |        |        |         |         |   |
| 5068   | CA  | CA  | . THR THR THR B B 236 236 . | 0.4580 | 0.4692 | 0.4553 | 0.0180  | 0.0097  |   |
| 0.0028 | 1   | .   |                             |        |        |        |         |         |   |
| 5069   | CB  | CB  | . THR THR THR B B 236 236 . | 0.4737 | 0.4678 | 0.4505 | 0.0177  | 0.0078  |   |
| 0.0084 | 1   | .   |                             |        |        |        |         |         |   |
| 5070   | OG1 | OG1 | . THR THR THR B B 236 236 . | 0.4744 | 0.4993 | 0.4844 | 0.0087  | 0.0037  | - |
| 0.0128 | 1   | .   |                             |        |        |        |         |         |   |
| 5071   | CG2 | CG2 | . THR THR THR B B 236 236 . | 0.4790 | 0.4508 | 0.4886 | 0.0319  | 0.0159  |   |
| 0.0097 | 1   | .   |                             |        |        |        |         |         |   |
| 5072   | C   | C   | . THR THR THR B B 236 236 . | 0.4934 | 0.4858 | 0.4537 | 0.0160  | 0.0109  |   |
| 0.0004 | 1   | .   |                             |        |        |        |         |         |   |
| 5073   | O   | O   | . THR THR THR B B 236 236 . | 0.4997 | 0.4837 | 0.4519 | 0.0440  | 0.0175  | - |
| 0.0081 | 1   | .   |                             |        |        |        |         |         |   |
| 5074   | N   | N   | . GLU GLU GLU B B 237 237 . | 0.5152 | 0.4995 | 0.4772 | 0.0157  | 0.0112  | - |
| 0.0033 | 1   | .   |                             |        |        |        |         |         |   |
| 5075   | CA  | CA  | . GLU GLU GLU B B 237 237 . | 0.5211 | 0.5391 | 0.5163 | 0.0080  | 0.0076  | - |
| 0.0013 | 1   | .   |                             |        |        |        |         |         |   |
| 5076   | CB  | CB  | . GLU GLU GLU B B 237 237 . | 0.5474 | 0.5518 | 0.5394 | 0.0100  | 0.0102  | - |
| 0.0015 | 1   | .   |                             |        |        |        |         |         |   |
| 5077   | CG  | CG  | . GLU GLU GLU B B 237 237 . | 0.5913 | 0.6276 | 0.6257 | -0.0057 | 0.0344  |   |
| 0.0162 | 1   | .   |                             |        |        |        |         |         |   |
| 5078   | CD  | CD  | . GLU GLU GLU B B 237 237 . | 0.6817 | 0.7359 | 0.7197 | -0.0329 | 0.0161  |   |
| 0.0395 | 1   | .   |                             |        |        |        |         |         |   |
| 5079   | OE1 | OE1 | . GLU GLU GLU B B 237 237 . | 0.7829 | 0.7338 | 0.7709 | -0.0475 | 0.0399  |   |
| 0.0730 | 1   | .   |                             |        |        |        |         |         |   |
| 5080   | OE2 | OE2 | . GLU GLU GLU B B 237 237 . | 0.7184 | 0.7636 | 0.7420 | -0.0610 | 0.0776  |   |
| 0.0595 | 1   | .   |                             |        |        |        |         |         |   |
| 5081   | C   | C   | . GLU GLU GLU B B 237 237 . | 0.5204 | 0.5356 | 0.5021 | 0.0094  | 0.0038  | - |
| 0.0034 | 1   | .   |                             |        |        |        |         |         |   |
| 5082   | O   | O   | . GLU GLU GLU B B 237 237 . | 0.5219 | 0.5629 | 0.5029 | 0.0135  | -0.0010 |   |
| 0.0042 | 1   | .   |                             |        |        |        |         |         |   |

|        |     |     |                             |        |        |        |         |         |   |
|--------|-----|-----|-----------------------------|--------|--------|--------|---------|---------|---|
| 5083   | N   | N   | . LYS LYS LYS B B 238 238 . | 0.5049 | 0.4983 | 0.4786 | 0.0088  | -0.0011 | - |
| 0.0105 | 1   | .   |                             |        |        |        |         |         |   |
| 5084   | CA  | CA  | . LYS LYS LYS B B 238 238 . | 0.4902 | 0.4771 | 0.4543 | 0.0099  | 0.0020  | - |
| 0.0024 | 1   | .   |                             |        |        |        |         |         |   |
| 5085   | CB  | CB  | . LYS LYS LYS B B 238 238 . | 0.5055 | 0.4865 | 0.4755 | 0.0109  | -0.0101 | - |
| 0.0026 | 1   | .   |                             |        |        |        |         |         |   |
| 5086   | CG  | CG  | . LYS LYS LYS B B 238 238 . | 0.5821 | 0.5317 | 0.5011 | 0.0098  | -0.0236 | - |
| 0.0223 | 1   | .   |                             |        |        |        |         |         |   |
| 5087   | CD  | CD  | . LYS LYS LYS B B 238 238 . | 0.6265 | 0.5712 | 0.5522 | -0.0083 | -0.0330 | - |
| 0.0021 | 1   | .   |                             |        |        |        |         |         |   |
| 5088   | CE  | CE  | . LYS LYS LYS B B 238 238 . | 0.6497 | 0.6015 | 0.5849 | -0.0469 | -0.0269 | - |
| 0.0466 | 1   | .   |                             |        |        |        |         |         |   |
| 5089   | NZ  | NZ  | . LYS LYS LYS B B 238 238 . | 0.6431 | 0.6459 | 0.5955 | -0.0458 | -0.0060 | - |
| 0.0464 | 1   | .   |                             |        |        |        |         |         |   |
| 5090   | C   | C   | . LYS LYS LYS B B 238 238 . | 0.4574 | 0.4514 | 0.4167 | 0.0035  | 0.0044  | - |
| 0.0010 | 1   | .   |                             |        |        |        |         |         |   |
| 5091   | O   | O   | . LYS LYS LYS B B 238 238 . | 0.4912 | 0.4538 | 0.3958 | 0.0157  | 0.0094  | - |
| 0.0070 | 1   | .   |                             |        |        |        |         |         |   |
| 5092   | N   | N   | . ILE ILE ILE B B 239 239 . | 0.4128 | 0.4210 | 0.3816 | 0.0125  | 0.0166  | - |
| 0.0041 | 1   | .   |                             |        |        |        |         |         |   |
| 5093   | CA  | CA  | . ILE ILE ILE B B 239 239 . | 0.4014 | 0.4090 | 0.3841 | -0.0040 | 0.0085  | - |
| 0.0005 | 1   | .   |                             |        |        |        |         |         |   |
| 5094   | CB  | CB  | . ILE ILE ILE B B 239 239 . | 0.3809 | 0.3985 | 0.3904 | -0.0089 | -0.0035 | - |
| 0.0052 | 1   | .   |                             |        |        |        |         |         |   |
| 5095   | CG1 | CG1 | . ILE ILE ILE B B 239 239 . | 0.4134 | 0.4177 | 0.3840 | 0.0097  | -0.0026 | - |
| 0.0046 | 1   | .   |                             |        |        |        |         |         |   |
| 5096   | CD1 | CD1 | . ILE ILE ILE B B 239 239 . | 0.3740 | 0.4715 | 0.4264 | -0.0259 | -0.0685 | - |
| 0.0204 | 1   | .   |                             |        |        |        |         |         |   |
| 5097   | CG2 | CG2 | . ILE ILE ILE B B 239 239 . | 0.3307 | 0.3881 | 0.3751 | -0.0067 | 0.0302  | - |
| 0.0160 | 1   | .   |                             |        |        |        |         |         |   |
| 5098   | C   | C   | . ILE ILE ILE B B 239 239 . | 0.3873 | 0.3952 | 0.3756 | 0.0024  | 0.0000  | - |
| 0.0020 | 1   | .   |                             |        |        |        |         |         |   |
| 5099   | O   | O   | . ILE ILE ILE B B 239 239 . | 0.4066 | 0.4243 | 0.3628 | 0.0054  | 0.0092  | - |
| 0.0002 | 1   | .   |                             |        |        |        |         |         |   |
| 5100   | N   | N   | . VAL VAL VAL B B 240 240 . | 0.3552 | 0.3723 | 0.3523 | 0.0070  | -0.0010 | - |
| 0.0030 | 1   | .   |                             |        |        |        |         |         |   |
| 5101   | CA  | CA  | . VAL VAL VAL B B 240 240 . | 0.3178 | 0.3510 | 0.3290 | 0.0000  | -0.0047 | - |
| 0.0007 | 1   | .   |                             |        |        |        |         |         |   |
| 5102   | CB  | CB  | . VAL VAL VAL B B 240 240 . | 0.3138 | 0.3384 | 0.3179 | 0.0142  | -0.0004 | - |
| 0.0080 | 1   | .   |                             |        |        |        |         |         |   |
| 5103   | CG1 | CG1 | . VAL VAL VAL B B 240 240 . | 0.3792 | 0.3309 | 0.3360 | -0.0279 | -0.0013 | - |
| 0.0108 | 1   | .   |                             |        |        |        |         |         |   |
| 5104   | CG2 | CG2 | . VAL VAL VAL B B 240 240 . | 0.2642 | 0.3114 | 0.3054 | -0.0699 | -0.0248 | - |
| 0.0115 | 1   | .   |                             |        |        |        |         |         |   |
| 5105   | C   | C   | . VAL VAL VAL B B 240 240 . | 0.2988 | 0.3469 | 0.3303 | 0.0095  | -0.0063 | - |
| 0.0078 | 1   | .   |                             |        |        |        |         |         |   |
| 5106   | O   | O   | . VAL VAL VAL B B 240 240 . | 0.2868 | 0.3603 | 0.3314 | 0.0129  | -0.0076 | - |
| 0.0052 | 1   | .   |                             |        |        |        |         |         |   |
| 5107   | N   | N   | . ILE ILE ILE B B 241 241 . | 0.2705 | 0.3286 | 0.3208 | 0.0147  | -0.0087 | - |
| 0.0116 | 1   | .   |                             |        |        |        |         |         |   |
| 5108   | CA  | CA  | . ILE ILE ILE B B 241 241 . | 0.2980 | 0.3241 | 0.2938 | 0.0113  | 0.0048  | - |
| 0.0107 | 1   | .   |                             |        |        |        |         |         |   |
| 5109   | CB  | CB  | . ILE ILE ILE B B 241 241 . | 0.2785 | 0.3157 | 0.3103 | 0.0173  | -0.0029 | - |
| 0.0046 | 1   | .   |                             |        |        |        |         |         |   |
| 5110   | CG1 | CG1 | . ILE ILE ILE B B 241 241 . | 0.2763 | 0.3275 | 0.2482 | -0.0002 | -0.0082 | - |
| 0.0215 | 1   | .   |                             |        |        |        |         |         |   |
| 5111   | CD1 | CD1 | . ILE ILE ILE B B 241 241 . | 0.2019 | 0.4184 | 0.2695 | 0.0481  | 0.0075  | - |
| 0.0526 | 1   | .   |                             |        |        |        |         |         |   |
| 5112   | CG2 | CG2 | . ILE ILE ILE B B 241 241 . | 0.2964 | 0.3201 | 0.2220 | -0.0159 | 0.0360  | - |
| 0.0191 | 1   | .   |                             |        |        |        |         |         |   |



|        |     |     |                             |        |        |        |         |         |   |
|--------|-----|-----|-----------------------------|--------|--------|--------|---------|---------|---|
| 5113   | C   | C   | . ILE ILE ILE B B 241 241 . | 0.3208 | 0.3398 | 0.3095 | 0.0203  | 0.0033  |   |
| 0.0083 | 1   | .   |                             |        |        |        |         |         |   |
| 5114   | O   | O   | . ILE ILE ILE B B 241 241 . | 0.3264 | 0.3495 | 0.3043 | 0.0192  | -0.0032 |   |
| 0.0147 | 1   | .   |                             |        |        |        |         |         |   |
| 5115   | N   | N   | . GLY GLY GLY B B 242 242 . | 0.3501 | 0.3364 | 0.3051 | 0.0232  | 0.0120  |   |
| 0.0061 | 1   | .   |                             |        |        |        |         |         |   |
| 5116   | CA  | CA  | . GLY GLY GLY B B 242 242 . | 0.3242 | 0.3336 | 0.3120 | 0.0161  | 0.0102  |   |
| 0.0107 | 1   | .   |                             |        |        |        |         |         |   |
| 5117   | C   | C   | . GLY GLY GLY B B 242 242 . | 0.3325 | 0.3340 | 0.3172 | 0.0068  | 0.0152  |   |
| 0.0070 | 1   | .   |                             |        |        |        |         |         |   |
| 5118   | O   | O   | . GLY GLY GLY B B 242 242 . | 0.3822 | 0.3377 | 0.3168 | -0.0152 | 0.0265  |   |
| 0.0072 | 1   | .   |                             |        |        |        |         |         |   |
| 5119   | N   | N   | . MET MET MET B B 243 243 . | 0.3523 | 0.3444 | 0.3311 | -0.0014 | 0.0139  |   |
| 0.0026 | 1   | .   |                             |        |        |        |         |         |   |
| 5120   | CA  | CA  | . MET MET MET B B 243 243 . | 0.3509 | 0.3551 | 0.3339 | -0.0013 | 0.0041  |   |
| 0.0026 | 1   | .   |                             |        |        |        |         |         |   |
| 5121   | CB  | CB  | . MET MET MET B B 243 243 . | 0.3490 | 0.3657 | 0.3703 | -0.0144 | 0.0003  | - |
| 0.0065 | 1   | .   |                             |        |        |        |         |         |   |
| 5122   | CG  | CG  | . MET MET MET B B 243 243 . | 0.3910 | 0.3914 | 0.3914 | 0.0133  | -0.0030 | - |
| 0.0311 | 1   | .   |                             |        |        |        |         |         |   |
| 5123   | SD  | SD  | . MET MET MET B B 243 243 . | 0.4524 | 0.4326 | 0.4666 | -0.0305 | 0.0046  | - |
| 0.0008 | 1   | .   |                             |        |        |        |         |         |   |
| 5124   | CE  | CE  | . MET MET MET B B 243 243 . | 0.5224 | 0.4558 | 0.4058 | -0.0449 | -0.0221 | - |
| 0.0057 | 1   | .   |                             |        |        |        |         |         |   |
| 5125   | C   | C   | . MET MET MET B B 243 243 . | 0.3541 | 0.3360 | 0.3359 | 0.0065  | -0.0005 |   |
| 0.0088 | 1   | .   |                             |        |        |        |         |         |   |
| 5126   | O   | O   | . MET MET MET B B 243 243 . | 0.3586 | 0.3444 | 0.3425 | 0.0120  | -0.0109 | - |
| 0.0002 | 1   | .   |                             |        |        |        |         |         |   |
| 5127   | N   | N   | . ASP ASP ASP B B 244 244 . | 0.3313 | 0.3188 | 0.3293 | 0.0027  | -0.0017 |   |
| 0.0064 | 1   | .   |                             |        |        |        |         |         |   |
| 5128   | CA  | CA  | . ASP ASP ASP B B 244 244 . | 0.3450 | 0.3243 | 0.3275 | 0.0036  | 0.0037  |   |
| 0.0135 | 1   | .   |                             |        |        |        |         |         |   |
| 5129   | CB  | CB  | . ASP ASP ASP B B 244 244 . | 0.3527 | 0.3288 | 0.3342 | 0.0168  | 0.0164  |   |
| 0.0189 | 1   | .   |                             |        |        |        |         |         |   |
| 5130   | CG  | CG  | . ASP ASP ASP B B 244 244 . | 0.3212 | 0.3231 | 0.3020 | 0.0124  | 0.0042  |   |
| 0.0328 | 1   | .   |                             |        |        |        |         |         |   |
| 5131   | OD1 | OD1 | . ASP ASP ASP B B 244 244 . | 0.2094 | 0.3322 | 0.2907 | 0.0129  | -0.0392 |   |
| 0.0563 | 1   | .   |                             |        |        |        |         |         |   |
| 5132   | OD2 | OD2 | . ASP ASP ASP B B 244 244 . | 0.3120 | 0.3153 | 0.3154 | 0.0297  | -0.0419 |   |
| 0.0371 | 1   | .   |                             |        |        |        |         |         |   |
| 5133   | C   | C   | . ASP ASP ASP B B 244 244 . | 0.3394 | 0.3279 | 0.3302 | 0.0030  | -0.0041 |   |
| 0.0073 | 1   | .   |                             |        |        |        |         |         |   |
| 5134   | O   | O   | . ASP ASP ASP B B 244 244 . | 0.3426 | 0.3296 | 0.3239 | 0.0159  | -0.0157 |   |
| 0.0142 | 1   | .   |                             |        |        |        |         |         |   |
| 5135   | N   | N   | . VAL VAL VAL B B 245 245 . | 0.3392 | 0.3094 | 0.3131 | -0.0049 | 0.0021  |   |
| 0.0084 | 1   | .   |                             |        |        |        |         |         |   |
| 5136   | CA  | CA  | . VAL VAL VAL B B 245 245 . | 0.3155 | 0.3284 | 0.3087 | -0.0017 | 0.0076  |   |
| 0.0021 | 1   | .   |                             |        |        |        |         |         |   |
| 5137   | CB  | CB  | . VAL VAL VAL B B 245 245 . | 0.3298 | 0.3170 | 0.3049 | -0.0094 | 0.0199  |   |
| 0.0011 | 1   | .   |                             |        |        |        |         |         |   |
| 5138   | CG1 | CG1 | . VAL VAL VAL B B 245 245 . | 0.3186 | 0.3002 | 0.3256 | -0.0132 | 0.0295  | - |
| 0.0547 | 1   | .   |                             |        |        |        |         |         |   |
| 5139   | CG2 | CG2 | . VAL VAL VAL B B 245 245 . | 0.3313 | 0.3254 | 0.2686 | 0.0216  | 0.0263  |   |
| 0.0151 | 1   | .   |                             |        |        |        |         |         |   |
| 5140   | C   | C   | . VAL VAL VAL B B 245 245 . | 0.3059 | 0.3211 | 0.2948 | -0.0109 | -0.0017 |   |
| 0.0100 | 1   | .   |                             |        |        |        |         |         |   |
| 5141   | O   | O   | . VAL VAL VAL B B 245 245 . | 0.2480 | 0.3383 | 0.2761 | -0.0077 | -0.0171 |   |
| 0.0397 | 1   | .   |                             |        |        |        |         |         |   |
| 5142   | N   | N   | . ALA ALA ALA B B 246 246 . | 0.2723 | 0.3197 | 0.2936 | -0.0094 | -0.0015 |   |
| 0.0143 | 1   | .   |                             |        |        |        |         |         |   |

|        |     |     |                             |        |        |        |         |         |   |
|--------|-----|-----|-----------------------------|--------|--------|--------|---------|---------|---|
| 5143   | CA  | CA  | . ALA ALA ALA B B 246 246 . | 0.3061 | 0.3319 | 0.2939 | -0.0044 | -0.0081 |   |
| 0.0082 | 1   | .   |                             |        |        |        |         |         |   |
| 5144   | CB  | CB  | . ALA ALA ALA B B 246 246 . | 0.2977 | 0.3296 | 0.2942 | -0.0034 | -0.0075 |   |
| 0.0179 | 1   | .   |                             |        |        |        |         |         |   |
| 5145   | C   | C   | . ALA ALA ALA B B 246 246 . | 0.3241 | 0.3420 | 0.3102 | -0.0083 | -0.0104 |   |
| 0.0016 | 1   | .   |                             |        |        |        |         |         |   |
| 5146   | O   | O   | . ALA ALA ALA B B 246 246 . | 0.3291 | 0.3757 | 0.3215 | 0.0042  | -0.0217 |   |
| 0.0071 | 1   | .   |                             |        |        |        |         |         |   |
| 5147   | N   | N   | . ALA ALA ALA B B 247 247 . | 0.3396 | 0.3438 | 0.3415 | -0.0034 | -0.0154 |   |
| 0.0053 | 1   | .   |                             |        |        |        |         |         |   |
| 5148   | CA  | CA  | . ALA ALA ALA B B 247 247 . | 0.3483 | 0.3470 | 0.3381 | 0.0004  | -0.0088 | - |
| 0.0019 | 1   | .   |                             |        |        |        |         |         |   |
| 5149   | CB  | CB  | . ALA ALA ALA B B 247 247 . | 0.3696 | 0.3420 | 0.3458 | 0.0042  | -0.0268 | - |
| 0.0082 | 1   | .   |                             |        |        |        |         |         |   |
| 5150   | C   | C   | . ALA ALA ALA B B 247 247 . | 0.3458 | 0.3527 | 0.3491 | -0.0027 | -0.0140 | - |
| 0.0039 | 1   | .   |                             |        |        |        |         |         |   |
| 5151   | O   | O   | . ALA ALA ALA B B 247 247 . | 0.3430 | 0.3578 | 0.3727 | 0.0015  | -0.0185 | - |
| 0.0051 | 1   | .   |                             |        |        |        |         |         |   |
| 5152   | N   | N   | . SER SER SER B B 248 248 . | 0.3111 | 0.3622 | 0.3145 | -0.0013 | -0.0127 | - |
| 0.0102 | 1   | .   |                             |        |        |        |         |         |   |
| 5153   | CA  | CA  | . SER SER SER B B 248 248 . | 0.3198 | 0.3463 | 0.3422 | -0.0040 | -0.0137 | - |
| 0.0080 | 1   | .   |                             |        |        |        |         |         |   |
| 5154   | CB  | CB  | . SER SER SER B B 248 248 . | 0.3301 | 0.3531 | 0.3353 | -0.0076 | -0.0104 | - |
| 0.0124 | 1   | .   |                             |        |        |        |         |         |   |
| 5155   | OG  | OG  | . SER SER SER B B 248 248 . | 0.2610 | 0.3612 | 0.3368 | -0.0211 | -0.0261 | - |
| 0.0070 | 1   | .   |                             |        |        |        |         |         |   |
| 5156   | C   | C   | . SER SER SER B B 248 248 . | 0.3507 | 0.3600 | 0.3547 | 0.0015  | -0.0047 | - |
| 0.0096 | 1   | .   |                             |        |        |        |         |         |   |
| 5157   | O   | O   | . SER SER SER B B 248 248 . | 0.3569 | 0.3678 | 0.3362 | 0.0079  | 0.0010  | - |
| 0.0279 | 1   | .   |                             |        |        |        |         |         |   |
| 5158   | N   | N   | . GLU GLU GLU B B 249 249 . | 0.3839 | 0.3788 | 0.3754 | -0.0045 | -0.0083 | - |
| 0.0031 | 1   | .   |                             |        |        |        |         |         |   |
| 5159   | CA  | CA  | . GLU GLU GLU B B 249 249 . | 0.3986 | 0.3996 | 0.3949 | 0.0037  | -0.0024 | - |
| 0.0099 | 1   | .   |                             |        |        |        |         |         |   |
| 5160   | CB  | CB  | . GLU GLU GLU B B 249 249 . | 0.4138 | 0.4065 | 0.4022 | 0.0093  | -0.0004 | - |
| 0.0144 | 1   | .   |                             |        |        |        |         |         |   |
| 5161   | CG  | CG  | . GLU GLU GLU B B 249 249 . | 0.3727 | 0.4394 | 0.4105 | 0.0099  | -0.0013 | - |
| 0.0393 | 1   | .   |                             |        |        |        |         |         |   |
| 5162   | CD  | CD  | . GLU GLU GLU B B 249 249 . | 0.4059 | 0.4753 | 0.4844 | 0.0019  | -0.0046 | - |
| 0.1117 | 1   | .   |                             |        |        |        |         |         |   |
| 5163   | OE1 | OE1 | . GLU GLU GLU B B 249 249 . | 0.3547 | 0.4996 | 0.4399 | 0.0478  | -0.0153 | - |
| 0.1015 | 1   | .   |                             |        |        |        |         |         |   |
| 5164   | OE2 | OE2 | . GLU GLU GLU B B 249 249 . | 0.4190 | 0.4737 | 0.5690 | -0.0688 | -0.0030 | - |
| 0.1171 | 1   | .   |                             |        |        |        |         |         |   |
| 5165   | C   | C   | . GLU GLU GLU B B 249 249 . | 0.4041 | 0.4096 | 0.4174 | 0.0052  | -0.0096 | - |
| 0.0132 | 1   | .   |                             |        |        |        |         |         |   |
| 5166   | O   | O   | . GLU GLU GLU B B 249 249 . | 0.4499 | 0.4362 | 0.4520 | 0.0221  | -0.0055 | - |
| 0.0154 | 1   | .   |                             |        |        |        |         |         |   |
| 5167   | N   | N   | . PHE PHE PHE B B 250 250 . | 0.3960 | 0.4096 | 0.4117 | 0.0011  | -0.0073 | - |
| 0.0025 | 1   | .   |                             |        |        |        |         |         |   |
| 5168   | CA  | CA  | . PHE PHE PHE B B 250 250 . | 0.4223 | 0.4191 | 0.4282 | -0.0006 | -0.0048 | - |
| 0.0022 | 1   | .   |                             |        |        |        |         |         |   |
| 5169   | CB  | CB  | . PHE PHE PHE B B 250 250 . | 0.3904 | 0.4187 | 0.4227 | -0.0024 | -0.0072 | - |
| 0.0057 | 1   | .   |                             |        |        |        |         |         |   |
| 5170   | CG  | CG  | . PHE PHE PHE B B 250 250 . | 0.4211 | 0.4204 | 0.4146 | -0.0155 | 0.0029  |   |
| 0.0072 | 1   | .   |                             |        |        |        |         |         |   |
| 5171   | CD1 | CD1 | . PHE PHE PHE B B 250 250 . | 0.4827 | 0.4185 | 0.4270 | -0.0182 | -0.0235 |   |
| 0.0077 | 1   | .   |                             |        |        |        |         |         |   |
| 5172   | CE1 | CE1 | . PHE PHE PHE B B 250 250 . | 0.4967 | 0.4337 | 0.3612 | -0.0346 | -0.0245 | - |
| 0.0075 | 1   | .   |                             |        |        |        |         |         |   |



|        |     |     |                             |        |        |        |         |         |   |
|--------|-----|-----|-----------------------------|--------|--------|--------|---------|---------|---|
| 5203   | CB  | CB  | . ASP ASP ASP B B 253 253 . | 0.5289 | 0.5020 | 0.5319 | -0.0042 | -0.0064 | - |
| 0.0041 | 1   | .   |                             |        |        |        |         |         |   |
| 5204   | CG  | CG  | . ASP ASP ASP B B 253 253 . | 0.5711 | 0.5605 | 0.5752 | -0.0105 | -0.0007 | - |
| 0.0236 | 1   | .   |                             |        |        |        |         |         |   |
| 5205   | OD1 | OD1 | . ASP ASP ASP B B 253 253 . | 0.5972 | 0.5636 | 0.6711 | -0.0062 | -0.0304 | - |
| 0.0306 | 1   | .   |                             |        |        |        |         |         |   |
| 5206   | OD2 | OD2 | . ASP ASP ASP B B 253 253 . | 0.5393 | 0.5878 | 0.6485 | -0.0064 | 0.0407  | - |
| 0.0425 | 1   | .   |                             |        |        |        |         |         |   |
| 5207   | C   | C   | . ASP ASP ASP B B 253 253 . | 0.4954 | 0.4876 | 0.5030 | 0.0020  | 0.0045  | - |
| 0.0003 | 1   | .   |                             |        |        |        |         |         |   |
| 5208   | O   | O   | . ASP ASP ASP B B 253 253 . | 0.4790 | 0.4807 | 0.5094 | 0.0056  | 0.0192  | - |
| 0.0052 | 1   | .   |                             |        |        |        |         |         |   |
| 5209   | N   | N   | . GLY GLY GLY B B 254 254 . | 0.4836 | 0.4754 | 0.4922 | 0.0026  | 0.0119  | - |
| 0.0019 | 1   | .   |                             |        |        |        |         |         |   |
| 5210   | CA  | CA  | . GLY GLY GLY B B 254 254 . | 0.4823 | 0.4566 | 0.4766 | 0.0019  | 0.0132  | - |
| 0.0007 | 1   | .   |                             |        |        |        |         |         |   |
| 5211   | C   | C   | . GLY GLY GLY B B 254 254 . | 0.4856 | 0.4554 | 0.4681 | -0.0033 | 0.0123  | - |
| 0.0013 | 1   | .   |                             |        |        |        |         |         |   |
| 5212   | O   | O   | . GLY GLY GLY B B 254 254 . | 0.4967 | 0.4401 | 0.4495 | -0.0068 | 0.0357  | - |
| 0.0125 | 1   | .   |                             |        |        |        |         |         |   |
| 5213   | N   | N   | . LYS LYS LYS B B 255 255 . | 0.4493 | 0.4453 | 0.4696 | -0.0031 | 0.0113  | - |
| 0.0032 | 1   | .   |                             |        |        |        |         |         |   |
| 5214   | CA  | CA  | . LYS LYS LYS B B 255 255 . | 0.4473 | 0.4548 | 0.4736 | -0.0025 | 0.0092  | - |
| 0.0026 | 1   | .   |                             |        |        |        |         |         |   |
| 5215   | CB  | CB  | . LYS LYS LYS B B 255 255 . | 0.4519 | 0.4549 | 0.4890 | -0.0131 | 0.0215  | - |
| 0.0001 | 1   | .   |                             |        |        |        |         |         |   |
| 5216   | CG  | CG  | . LYS LYS LYS B B 255 255 . | 0.4614 | 0.4758 | 0.4931 | 0.0073  | 0.0175  | - |
| 0.0107 | 1   | .   |                             |        |        |        |         |         |   |
| 5217   | CD  | CD  | . LYS LYS LYS B B 255 255 . | 0.5345 | 0.5436 | 0.5669 | -0.0449 | 0.0260  | - |
| 0.0161 | 1   | .   |                             |        |        |        |         |         |   |
| 5218   | CE  | CE  | . LYS LYS LYS B B 255 255 . | 0.5450 | 0.6041 | 0.5871 | -0.0403 | 0.0489  | - |
| 0.0296 | 1   | .   |                             |        |        |        |         |         |   |
| 5219   | NZ  | NZ  | . LYS LYS LYS B B 255 255 . | 0.5483 | 0.6898 | 0.6698 | -0.0350 | 0.0271  | - |
| 0.0043 | 1   | .   |                             |        |        |        |         |         |   |
| 5220   | C   | C   | . LYS LYS LYS B B 255 255 . | 0.4438 | 0.4516 | 0.4735 | -0.0018 | 0.0110  | - |
| 0.0020 | 1   | .   |                             |        |        |        |         |         |   |
| 5221   | O   | O   | . LYS LYS LYS B B 255 255 . | 0.4479 | 0.4532 | 0.4953 | 0.0085  | 0.0148  | - |
| 0.0009 | 1   | .   |                             |        |        |        |         |         |   |
| 5222   | N   | N   | . TYR TYR TYR B B 256 256 . | 0.4410 | 0.4333 | 0.4546 | 0.0042  | 0.0011  | - |
| 0.0042 | 1   | .   |                             |        |        |        |         |         |   |
| 5223   | CA  | CA  | . TYR TYR TYR B B 256 256 . | 0.4246 | 0.4262 | 0.4402 | 0.0000  | -0.0040 | - |
| 0.0116 | 1   | .   |                             |        |        |        |         |         |   |
| 5224   | CB  | CB  | . TYR TYR TYR B B 256 256 . | 0.3976 | 0.4059 | 0.4265 | -0.0002 | 0.0021  | - |
| 0.0065 | 1   | .   |                             |        |        |        |         |         |   |
| 5225   | CG  | CG  | . TYR TYR TYR B B 256 256 . | 0.3711 | 0.3400 | 0.3428 | -0.0073 | 0.0011  | - |
| 0.0225 | 1   | .   |                             |        |        |        |         |         |   |
| 5226   | CD1 | CD1 | . TYR TYR TYR B B 256 256 . | 0.3320 | 0.3072 | 0.3526 | -0.0137 | -0.0142 | - |
| 0.0554 | 1   | .   |                             |        |        |        |         |         |   |
| 5227   | CE1 | CE1 | . TYR TYR TYR B B 256 256 . | 0.3084 | 0.2631 | 0.3269 | 0.0313  | -0.0206 | - |
| 0.0298 | 1   | .   |                             |        |        |        |         |         |   |
| 5228   | CZ  | CZ  | . TYR TYR TYR B B 256 256 . | 0.2878 | 0.2724 | 0.3157 | -0.0071 | -0.0202 | - |
| 0.0384 | 1   | .   |                             |        |        |        |         |         |   |
| 5229   | OH  | OH  | . TYR TYR TYR B B 256 256 . | 0.2593 | 0.3541 | 0.3936 | -0.0257 | 0.0035  | - |
| 0.0306 | 1   | .   |                             |        |        |        |         |         |   |
| 5230   | CE2 | CE2 | . TYR TYR TYR B B 256 256 . | 0.2772 | 0.2743 | 0.2807 | 0.0222  | 0.0266  | - |
| 0.0739 | 1   | .   |                             |        |        |        |         |         |   |
| 5231   | CD2 | CD2 | . TYR TYR TYR B B 256 256 . | 0.3061 | 0.3029 | 0.3212 | 0.0053  | 0.0136  | - |
| 0.0353 | 1   | .   |                             |        |        |        |         |         |   |
| 5232   | C   | C   | . TYR TYR TYR B B 256 256 . | 0.4547 | 0.4469 | 0.4625 | 0.0035  | -0.0086 | - |
| 0.0127 | 1   | .   |                             |        |        |        |         |         |   |

|        |     |     |                             |        |        |        |         |         |   |
|--------|-----|-----|-----------------------------|--------|--------|--------|---------|---------|---|
| 5233   | O   | O   | . TYR TYR TYR B B 256 256 . | 0.4278 | 0.4243 | 0.4627 | 0.0102  | -0.0091 | - |
| 0.0310 | 1   | .   |                             |        |        |        |         |         |   |
| 5234   | N   | N   | . ASP ASP ASP B B 257 257 . | 0.4858 | 0.4691 | 0.4797 | 0.0034  | -0.0203 | - |
| 0.0206 | 1   | .   |                             |        |        |        |         |         |   |
| 5235   | CA  | CA  | . ASP ASP ASP B B 257 257 . | 0.4902 | 0.5087 | 0.5114 | -0.0012 | -0.0311 | - |
| 0.0230 | 1   | .   |                             |        |        |        |         |         |   |
| 5236   | CB  | CB  | . ASP ASP ASP B B 257 257 . | 0.4877 | 0.5158 | 0.5173 | 0.0045  | -0.0397 | - |
| 0.0273 | 1   | .   |                             |        |        |        |         |         |   |
| 5237   | CG  | CG  | . ASP ASP ASP B B 257 257 . | 0.5067 | 0.6003 | 0.5218 | -0.0115 | -0.0503 | - |
| 0.0354 | 1   | .   |                             |        |        |        |         |         |   |
| 5238   | OD1 | OD1 | . ASP ASP ASP B B 257 257 . | 0.4588 | 0.5770 | 0.5141 | -0.0549 | -0.0458 | - |
| 0.0037 | 1   | .   |                             |        |        |        |         |         |   |
| 5239   | OD2 | OD2 | . ASP ASP ASP B B 257 257 . | 0.4870 | 0.6852 | 0.5037 | 0.0086  | -0.1257 | - |
| 0.0581 | 1   | .   |                             |        |        |        |         |         |   |
| 5240   | C   | C   | . ASP ASP ASP B B 257 257 . | 0.5004 | 0.5050 | 0.5231 | -0.0027 | -0.0242 | - |
| 0.0254 | 1   | .   |                             |        |        |        |         |         |   |
| 5241   | O   | O   | . ASP ASP ASP B B 257 257 . | 0.4656 | 0.4920 | 0.5217 | -0.0048 | -0.0282 | - |
| 0.0388 | 1   | .   |                             |        |        |        |         |         |   |
| 5242   | N   | N   | . LEU LEU LEU B B 258 258 . | 0.5304 | 0.5395 | 0.5420 | -0.0075 | -0.0209 | - |
| 0.0227 | 1   | .   |                             |        |        |        |         |         |   |
| 5243   | CA  | CA  | . LEU LEU LEU B B 258 258 . | 0.5513 | 0.5630 | 0.5603 | 0.0000  | -0.0149 | - |
| 0.0157 | 1   | .   |                             |        |        |        |         |         |   |
| 5244   | CB  | CB  | . LEU LEU LEU B B 258 258 . | 0.5363 | 0.5680 | 0.5430 | -0.0048 | -0.0158 | - |
| 0.0129 | 1   | .   |                             |        |        |        |         |         |   |
| 5245   | CG  | CG  | . LEU LEU LEU B B 258 258 . | 0.5120 | 0.5562 | 0.5143 | 0.0107  | -0.0111 | - |
| 0.0020 | 1   | .   |                             |        |        |        |         |         |   |
| 5246   | CD1 | CD1 | . LEU LEU LEU B B 258 258 . | 0.4823 | 0.5322 | 0.4769 | 0.0255  | -0.0463 | - |
| 0.0117 | 1   | .   |                             |        |        |        |         |         |   |
| 5247   | CD2 | CD2 | . LEU LEU LEU B B 258 258 . | 0.4706 | 0.5273 | 0.4224 | -0.0024 | -0.0429 | - |
| 0.0003 | 1   | .   |                             |        |        |        |         |         |   |
| 5248   | C   | C   | . LEU LEU LEU B B 258 258 . | 0.5725 | 0.5934 | 0.5905 | -0.0034 | -0.0196 | - |
| 0.0159 | 1   | .   |                             |        |        |        |         |         |   |
| 5249   | O   | O   | . LEU LEU LEU B B 258 258 . | 0.5859 | 0.5818 | 0.5926 | -0.0155 | -0.0248 | - |
| 0.0252 | 1   | .   |                             |        |        |        |         |         |   |
| 5250   | N   | N   | . ASP ASP ASP B B 259 259 . | 0.6064 | 0.6189 | 0.6310 | -0.0027 | -0.0194 | - |
| 0.0166 | 1   | .   |                             |        |        |        |         |         |   |
| 5251   | CA  | CA  | . ASP ASP ASP B B 259 259 . | 0.6454 | 0.6425 | 0.6556 | 0.0012  | -0.0179 | - |
| 0.0066 | 1   | .   |                             |        |        |        |         |         |   |
| 5252   | CB  | CB  | . ASP ASP ASP B B 259 259 . | 0.6519 | 0.6409 | 0.6763 | 0.0004  | -0.0257 | - |
| 0.0013 | 1   | .   |                             |        |        |        |         |         |   |
| 5253   | CG  | CG  | . ASP ASP ASP B B 259 259 . | 0.6779 | 0.6245 | 0.6907 | 0.0178  | -0.0224 | - |
| 0.0127 | 1   | .   |                             |        |        |        |         |         |   |
| 5254   | OD1 | OD1 | . ASP ASP ASP B B 259 259 . | 0.7832 | 0.5899 | 0.6962 | 0.0526  | -0.0256 | - |
| 0.0048 | 1   | .   |                             |        |        |        |         |         |   |
| 5255   | OD2 | OD2 | . ASP ASP ASP B B 259 259 . | 0.6480 | 0.5978 | 0.7385 | 0.0300  | -0.0349 | - |
| 0.0453 | 1   | .   |                             |        |        |        |         |         |   |
| 5256   | C   | C   | . ASP ASP ASP B B 259 259 . | 0.6610 | 0.6671 | 0.6745 | 0.0016  | -0.0172 | - |
| 0.0061 | 1   | .   |                             |        |        |        |         |         |   |
| 5257   | O   | O   | . ASP ASP ASP B B 259 259 . | 0.6641 | 0.6789 | 0.6847 | -0.0067 | -0.0240 | - |
| 0.0082 | 1   | .   |                             |        |        |        |         |         |   |
| 5258   | N   | N   | . PHE PHE PHE B B 260 260 . | 0.6678 | 0.6835 | 0.6874 | 0.0042  | -0.0170 | - |
| 0.0056 | 1   | .   |                             |        |        |        |         |         |   |
| 5259   | CA  | CA  | . PHE PHE PHE B B 260 260 . | 0.6905 | 0.6871 | 0.6947 | 0.0141  | -0.0128 | - |
| 0.0106 | 1   | .   |                             |        |        |        |         |         |   |
| 5260   | CB  | CB  | . PHE PHE PHE B B 260 260 . | 0.6786 | 0.6717 | 0.6863 | 0.0138  | -0.0180 | - |
| 0.0130 | 1   | .   |                             |        |        |        |         |         |   |
| 5261   | CG  | CG  | . PHE PHE PHE B B 260 260 . | 0.6529 | 0.6486 | 0.6693 | 0.0197  | -0.0361 | - |
| 0.0158 | 1   | .   |                             |        |        |        |         |         |   |
| 5262   | CD1 | CD1 | . PHE PHE PHE B B 260 260 . | 0.6805 | 0.6225 | 0.6621 | 0.0292  | -0.0481 | - |
| 0.0182 | 1   | .   |                             |        |        |        |         |         |   |



|        |     |     |                             |        |        |        |         |         |   |
|--------|-----|-----|-----------------------------|--------|--------|--------|---------|---------|---|
| 5293   | CB  | CB  | . THR THR THR B B 264 264 . | 0.7854 | 0.7755 | 0.7811 | 0.0031  | -0.0028 | - |
| 0.0032 | 1   | .   |                             |        |        |        |         |         |   |
| 5294   | OG1 | OG1 | . THR THR THR B B 264 264 . | 0.7556 | 0.7765 | 0.7787 | 0.0028  | -0.0148 | - |
| 0.0048 | 1   | .   |                             |        |        |        |         |         |   |
| 5295   | CG2 | CG2 | . THR THR THR B B 264 264 . | 0.7839 | 0.7590 | 0.7864 | 0.0123  | -0.0059 | - |
| 0.0020 | 1   | .   |                             |        |        |        |         |         |   |
| 5296   | C   | C   | . THR THR THR B B 264 264 . | 0.7827 | 0.7712 | 0.7894 | -0.0065 | -0.0026 | - |
| 0.0000 | 1   | .   |                             |        |        |        |         |         |   |
| 5297   | O   | O   | . THR THR THR B B 264 264 . | 0.7774 | 0.7724 | 0.7948 | -0.0129 | -0.0003 | - |
| 0.0014 | 1   | .   |                             |        |        |        |         |         |   |
| 5298   | N   | N   | . ASP ASP ASP B B 265 265 . | 0.7870 | 0.7694 | 0.7920 | -0.0062 | -0.0017 | - |
| 0.0003 | 1   | .   |                             |        |        |        |         |         |   |
| 5299   | CA  | CA  | . ASP ASP ASP B B 265 265 . | 0.7899 | 0.7721 | 0.7948 | -0.0014 | -0.0030 | - |
| 0.0019 | 1   | .   |                             |        |        |        |         |         |   |
| 5300   | CB  | CB  | . ASP ASP ASP B B 265 265 . | 0.7859 | 0.7741 | 0.7939 | -0.0043 | 0.0008  | - |
| 0.0022 | 1   | .   |                             |        |        |        |         |         |   |
| 5301   | CG  | CG  | . ASP ASP ASP B B 265 265 . | 0.7841 | 0.7695 | 0.7843 | -0.0021 | -0.0048 | - |
| 0.0089 | 1   | .   |                             |        |        |        |         |         |   |
| 5302   | OD1 | OD1 | . ASP ASP ASP B B 265 265 . | 0.7584 | 0.7735 | 0.7517 | 0.0074  | -0.0204 | - |
| 0.0238 | 1   | .   |                             |        |        |        |         |         |   |
| 5303   | OD2 | OD2 | . ASP ASP ASP B B 265 265 . | 0.7721 | 0.7797 | 0.7878 | -0.0070 | 0.0078  | - |
| 0.0226 | 1   | .   |                             |        |        |        |         |         |   |
| 5304   | C   | C   | . ASP ASP ASP B B 265 265 . | 0.7963 | 0.7774 | 0.8028 | 0.0006  | -0.0077 | - |
| 0.0020 | 1   | .   |                             |        |        |        |         |         |   |
| 5305   | O   | O   | . ASP ASP ASP B B 265 265 . | 0.7953 | 0.7806 | 0.8156 | 0.0056  | -0.0042 | - |
| 0.0024 | 1   | .   |                             |        |        |        |         |         |   |
| 5306   | N   | N   | . PRO PRO PRO B B 266 266 . | 0.7959 | 0.7833 | 0.8024 | 0.0044  | -0.0145 | - |
| 0.0024 | 1   | .   |                             |        |        |        |         |         |   |
| 5307   | CA  | CA  | . PRO PRO PRO B B 266 266 . | 0.7865 | 0.7797 | 0.7901 | 0.0034  | -0.0105 | - |
| 0.0025 | 1   | .   |                             |        |        |        |         |         |   |
| 5308   | CB  | CB  | . PRO PRO PRO B B 266 266 . | 0.7926 | 0.7879 | 0.7976 | 0.0031  | -0.0136 | - |
| 0.0027 | 1   | .   |                             |        |        |        |         |         |   |
| 5309   | CG  | CG  | . PRO PRO PRO B B 266 266 . | 0.7998 | 0.7874 | 0.8005 | 0.0083  | -0.0191 | - |
| 0.0075 | 1   | .   |                             |        |        |        |         |         |   |
| 5310   | CD  | CD  | . PRO PRO PRO B B 266 266 . | 0.7981 | 0.7845 | 0.8042 | 0.0087  | -0.0179 | - |
| 0.0028 | 1   | .   |                             |        |        |        |         |         |   |
| 5311   | C   | C   | . PRO PRO PRO B B 266 266 . | 0.7657 | 0.7745 | 0.7870 | -0.0021 | -0.0086 | - |
| 0.0022 | 1   | .   |                             |        |        |        |         |         |   |
| 5312   | O   | O   | . PRO PRO PRO B B 266 266 . | 0.7641 | 0.7783 | 0.7953 | 0.0014  | -0.0089 | - |
| 0.0076 | 1   | .   |                             |        |        |        |         |         |   |
| 5313   | N   | N   | . SER SER SER B B 267 267 . | 0.7422 | 0.7651 | 0.7704 | -0.0004 | -0.0134 | - |
| 0.0039 | 1   | .   |                             |        |        |        |         |         |   |
| 5314   | CA  | CA  | . SER SER SER B B 267 267 . | 0.7212 | 0.7564 | 0.7614 | -0.0083 | -0.0159 | - |
| 0.0080 | 1   | .   |                             |        |        |        |         |         |   |
| 5315   | CB  | CB  | . SER SER SER B B 267 267 . | 0.7171 | 0.7573 | 0.7610 | -0.0116 | -0.0204 | - |
| 0.0036 | 1   | .   |                             |        |        |        |         |         |   |
| 5316   | OG  | OG  | . SER SER SER B B 267 267 . | 0.6351 | 0.7502 | 0.7395 | -0.0322 | -0.0270 | - |
| 0.0149 | 1   | .   |                             |        |        |        |         |         |   |
| 5317   | C   | C   | . SER SER SER B B 267 267 . | 0.7115 | 0.7482 | 0.7481 | -0.0097 | -0.0160 | - |
| 0.0076 | 1   | .   |                             |        |        |        |         |         |   |
| 5318   | O   | O   | . SER SER SER B B 267 267 . | 0.7048 | 0.7611 | 0.7423 | -0.0092 | -0.0196 | - |
| 0.0186 | 1   | .   |                             |        |        |        |         |         |   |
| 5319   | N   | N   | . ARG ARG ARG B B 268 268 . | 0.6936 | 0.7281 | 0.7417 | -0.0129 | -0.0155 | - |
| 0.0078 | 1   | .   |                             |        |        |        |         |         |   |
| 5320   | CA  | CA  | . ARG ARG ARG B B 268 268 . | 0.6941 | 0.7108 | 0.7280 | -0.0084 | -0.0132 | - |
| 0.0126 | 1   | .   |                             |        |        |        |         |         |   |
| 5321   | CB  | CB  | . ARG ARG ARG B B 268 268 . | 0.6978 | 0.7015 | 0.7332 | -0.0097 | -0.0049 | - |
| 0.0087 | 1   | .   |                             |        |        |        |         |         |   |
| 5322   | CG  | CG  | . ARG ARG ARG B B 268 268 . | 0.7441 | 0.6982 | 0.7319 | -0.0040 | -0.0059 | - |
| 0.0125 | 1   | .   |                             |        |        |        |         |         |   |







|        |     |     |                             |        |        |        |         |         |   |
|--------|-----|-----|-----------------------------|--------|--------|--------|---------|---------|---|
| 5383   | CD2 | CD2 | . LEU LEU LEU B B 275 275 . | 0.3638 | 0.2870 | 0.3929 | 0.0460  | 0.0111  |   |
| 0.0297 | 1   | .   |                             |        |        |        |         |         |   |
| 5384   | C   | C   | . LEU LEU LEU B B 275 275 . | 0.4281 | 0.4563 | 0.4651 | 0.0064  | 0.0208  |   |
| 0.0076 | 1   | .   |                             |        |        |        |         |         |   |
| 5385   | O   | O   | . LEU LEU LEU B B 275 275 . | 0.3980 | 0.4766 | 0.5000 | 0.0056  | 0.0285  |   |
| 0.0107 | 1   | .   |                             |        |        |        |         |         |   |
| 5386   | N   | N   | . GLY GLY GLY B B 276 276 . | 0.4171 | 0.4579 | 0.4464 | -0.0028 | 0.0236  |   |
| 0.0083 | 1   | .   |                             |        |        |        |         |         |   |
| 5387   | CA  | CA  | . GLY GLY GLY B B 276 276 . | 0.4166 | 0.4540 | 0.4533 | -0.0097 | 0.0290  |   |
| 0.0069 | 1   | .   |                             |        |        |        |         |         |   |
| 5388   | C   | C   | . GLY GLY GLY B B 276 276 . | 0.4238 | 0.4461 | 0.4711 | -0.0078 | 0.0216  |   |
| 0.0037 | 1   | .   |                             |        |        |        |         |         |   |
| 5389   | O   | O   | . GLY GLY GLY B B 276 276 . | 0.4092 | 0.4650 | 0.4654 | -0.0224 | 0.0406  |   |
| 0.0073 | 1   | .   |                             |        |        |        |         |         |   |
| 5390   | N   | N   | . ALA ALA ALA B B 277 277 . | 0.4381 | 0.4448 | 0.4647 | 0.0020  | 0.0311  |   |
| 0.0031 | 1   | .   |                             |        |        |        |         |         |   |
| 5391   | CA  | CA  | . ALA ALA ALA B B 277 277 . | 0.4367 | 0.4508 | 0.4573 | -0.0047 | 0.0234  | - |
| 0.0024 | 1   | .   |                             |        |        |        |         |         |   |
| 5392   | CB  | CB  | . ALA ALA ALA B B 277 277 . | 0.4448 | 0.4460 | 0.4614 | 0.0004  | 0.0288  | - |
| 0.0113 | 1   | .   |                             |        |        |        |         |         |   |
| 5393   | C   | C   | . ALA ALA ALA B B 277 277 . | 0.4397 | 0.4519 | 0.4535 | -0.0021 | 0.0217  | - |
| 0.0071 | 1   | .   |                             |        |        |        |         |         |   |
| 5394   | O   | O   | . ALA ALA ALA B B 277 277 . | 0.4396 | 0.4749 | 0.4660 | -0.0125 | 0.0344  | - |
| 0.0107 | 1   | .   |                             |        |        |        |         |         |   |
| 5395   | N   | N   | . LEU LEU LEU B B 278 278 . | 0.4241 | 0.4409 | 0.4420 | -0.0018 | 0.0109  | - |
| 0.0102 | 1   | .   |                             |        |        |        |         |         |   |
| 5396   | CA  | CA  | . LEU LEU LEU B B 278 278 . | 0.4114 | 0.4309 | 0.4274 | 0.0044  | 0.0066  | - |
| 0.0117 | 1   | .   |                             |        |        |        |         |         |   |
| 5397   | CB  | CB  | . LEU LEU LEU B B 278 278 . | 0.3930 | 0.4334 | 0.4348 | 0.0209  | 0.0109  | - |
| 0.0270 | 1   | .   |                             |        |        |        |         |         |   |
| 5398   | CG  | CG  | . LEU LEU LEU B B 278 278 . | 0.4141 | 0.4072 | 0.4247 | 0.0348  | 0.0440  | - |
| 0.0113 | 1   | .   |                             |        |        |        |         |         |   |
| 5399   | CD1 | CD1 | . LEU LEU LEU B B 278 278 . | 0.3659 | 0.4341 | 0.5173 | 0.0319  | 0.0720  | - |
| 0.0038 | 1   | .   |                             |        |        |        |         |         |   |
| 5400   | CD2 | CD2 | . LEU LEU LEU B B 278 278 . | 0.4021 | 0.3893 | 0.4722 | 0.0365  | 0.0609  | - |
| 0.0333 | 1   | .   |                             |        |        |        |         |         |   |
| 5401   | C   | C   | . LEU LEU LEU B B 278 278 . | 0.3994 | 0.4219 | 0.4121 | 0.0059  | 0.0024  | - |
| 0.0100 | 1   | .   |                             |        |        |        |         |         |   |
| 5402   | O   | O   | . LEU LEU LEU B B 278 278 . | 0.4103 | 0.4376 | 0.3919 | 0.0007  | -0.0014 | - |
| 0.0091 | 1   | .   |                             |        |        |        |         |         |   |
| 5403   | N   | N   | . TYR TYR TYR B B 279 279 . | 0.3917 | 0.4039 | 0.4052 | -0.0067 | 0.0017  | - |
| 0.0098 | 1   | .   |                             |        |        |        |         |         |   |
| 5404   | CA  | CA  | . TYR TYR TYR B B 279 279 . | 0.3744 | 0.3866 | 0.3829 | -0.0021 | 0.0057  | - |
| 0.0064 | 1   | .   |                             |        |        |        |         |         |   |
| 5405   | CB  | CB  | . TYR TYR TYR B B 279 279 . | 0.3612 | 0.3772 | 0.3855 | 0.0015  | 0.0305  | - |
| 0.0159 | 1   | .   |                             |        |        |        |         |         |   |
| 5406   | CG  | CG  | . TYR TYR TYR B B 279 279 . | 0.4023 | 0.3598 | 0.4096 | -0.0094 | -0.0019 | - |
| 0.0123 | 1   | .   |                             |        |        |        |         |         |   |
| 5407   | CD1 | CD1 | . TYR TYR TYR B B 279 279 . | 0.3980 | 0.3929 | 0.4288 | 0.0046  | -0.0079 | - |
| 0.0116 | 1   | .   |                             |        |        |        |         |         |   |
| 5408   | CE1 | CE1 | . TYR TYR TYR B B 279 279 . | 0.3849 | 0.3593 | 0.3961 | 0.0050  | 0.0095  | - |
| 0.0019 | 1   | .   |                             |        |        |        |         |         |   |
| 5409   | CZ  | CZ  | . TYR TYR TYR B B 279 279 . | 0.3666 | 0.3924 | 0.4128 | -0.0149 | 0.0065  | - |
| 0.0123 | 1   | .   |                             |        |        |        |         |         |   |
| 5410   | OH  | OH  | . TYR TYR TYR B B 279 279 . | 0.3124 | 0.4147 | 0.3744 | -0.0135 | 0.0396  | - |
| 0.0008 | 1   | .   |                             |        |        |        |         |         |   |
| 5411   | CE2 | CE2 | . TYR TYR TYR B B 279 279 . | 0.3690 | 0.4036 | 0.4022 | 0.0062  | 0.0037  | - |
| 0.0038 | 1   | .   |                             |        |        |        |         |         |   |
| 5412   | CD2 | CD2 | . TYR TYR TYR B B 279 279 . | 0.3405 | 0.3941 | 0.4420 | -0.0056 | 0.0276  | - |
| 0.0140 | 1   | .   |                             |        |        |        |         |         |   |

|        |     |     |                             |        |        |        |         |         |   |
|--------|-----|-----|-----------------------------|--------|--------|--------|---------|---------|---|
| 5413   | C   | C   | . TYR TYR TYR B B 279 279 . | 0.3506 | 0.3866 | 0.3814 | 0.0065  | 0.0088  | - |
| 0.0005 | 1   | .   |                             |        |        |        |         |         |   |
| 5414   | O   | O   | . TYR TYR TYR B B 279 279 . | 0.3353 | 0.3858 | 0.3575 | -0.0007 | 0.0130  | - |
| 0.0082 | 1   | .   |                             |        |        |        |         |         |   |
| 5415   | N   | N   | . GLN GLN GLN B B 280 280 . | 0.3305 | 0.3906 | 0.3581 | -0.0060 | 0.0136  |   |
| 0.0060 | 1   | .   |                             |        |        |        |         |         |   |
| 5416   | CA  | CA  | . GLN GLN GLN B B 280 280 . | 0.3700 | 0.4010 | 0.3893 | 0.0040  | -0.0040 | - |
| 0.0078 | 1   | .   |                             |        |        |        |         |         |   |
| 5417   | CB  | CB  | . GLN GLN GLN B B 280 280 . | 0.3750 | 0.3952 | 0.3805 | -0.0013 | -0.0116 | - |
| 0.0002 | 1   | .   |                             |        |        |        |         |         |   |
| 5418   | CG  | CG  | . GLN GLN GLN B B 280 280 . | 0.4386 | 0.4201 | 0.3948 | 0.0264  | -0.0129 | - |
| 0.0280 | 1   | .   |                             |        |        |        |         |         |   |
| 5419   | CD  | CD  | . GLN GLN GLN B B 280 280 . | 0.4724 | 0.4902 | 0.4870 | 0.0285  | -0.0226 | - |
| 0.0081 | 1   | .   |                             |        |        |        |         |         |   |
| 5420   | OE1 | OE1 | . GLN GLN GLN B B 280 280 . | 0.5562 | 0.5332 | 0.5198 | 0.0537  | -0.0234 |   |
| 0.0239 | 1   | .   |                             |        |        |        |         |         |   |
| 5421   | NE2 | NE2 | . GLN GLN GLN B B 280 280 . | 0.5451 | 0.4692 | 0.4655 | 0.0844  | -0.0231 | - |
| 0.0089 | 1   | .   |                             |        |        |        |         |         |   |
| 5422   | C   | C   | . GLN GLN GLN B B 280 280 . | 0.3733 | 0.4012 | 0.3978 | 0.0078  | -0.0022 | - |
| 0.0108 | 1   | .   |                             |        |        |        |         |         |   |
| 5423   | O   | O   | . GLN GLN GLN B B 280 280 . | 0.3698 | 0.4196 | 0.4205 | 0.0001  | -0.0030 | - |
| 0.0230 | 1   | .   |                             |        |        |        |         |         |   |
| 5424   | N   | N   | . ASP ASP ASP B B 281 281 . | 0.3633 | 0.4167 | 0.4070 | 0.0029  | 0.0020  | - |
| 0.0181 | 1   | .   |                             |        |        |        |         |         |   |
| 5425   | CA  | CA  | . ASP ASP ASP B B 281 281 . | 0.3926 | 0.4302 | 0.4192 | 0.0056  | -0.0051 | - |
| 0.0109 | 1   | .   |                             |        |        |        |         |         |   |
| 5426   | CB  | CB  | . ASP ASP ASP B B 281 281 . | 0.3865 | 0.4443 | 0.4326 | 0.0043  | 0.0009  | - |
| 0.0210 | 1   | .   |                             |        |        |        |         |         |   |
| 5427   | CG  | CG  | . ASP ASP ASP B B 281 281 . | 0.4310 | 0.5016 | 0.4842 | 0.0031  | 0.0046  | - |
| 0.0129 | 1   | .   |                             |        |        |        |         |         |   |
| 5428   | OD1 | OD1 | . ASP ASP ASP B B 281 281 . | 0.4838 | 0.6291 | 0.5325 | 0.0166  | 0.0161  | - |
| 0.0296 | 1   | .   |                             |        |        |        |         |         |   |
| 5429   | OD2 | OD2 | . ASP ASP ASP B B 281 281 . | 0.4986 | 0.5233 | 0.5495 | 0.0216  | 0.0425  | - |
| 0.0407 | 1   | .   |                             |        |        |        |         |         |   |
| 5430   | C   | C   | . ASP ASP ASP B B 281 281 . | 0.3998 | 0.4328 | 0.4237 | 0.0044  | -0.0020 | - |
| 0.0150 | 1   | .   |                             |        |        |        |         |         |   |
| 5431   | O   | O   | . ASP ASP ASP B B 281 281 . | 0.3991 | 0.4384 | 0.4248 | 0.0112  | -0.0059 | - |
| 0.0276 | 1   | .   |                             |        |        |        |         |         |   |
| 5432   | N   | N   | . PHE PHE PHE B B 282 282 . | 0.3729 | 0.4255 | 0.4031 | 0.0142  | 0.0032  | - |
| 0.0097 | 1   | .   |                             |        |        |        |         |         |   |
| 5433   | CA  | CA  | . PHE PHE PHE B B 282 282 . | 0.3879 | 0.4246 | 0.4043 | 0.0127  | 0.0074  | - |
| 0.0042 | 1   | .   |                             |        |        |        |         |         |   |
| 5434   | CB  | CB  | . PHE PHE PHE B B 282 282 . | 0.4127 | 0.4066 | 0.3979 | 0.0095  | 0.0103  | - |
| 0.0090 | 1   | .   |                             |        |        |        |         |         |   |
| 5435   | CG  | CG  | . PHE PHE PHE B B 282 282 . | 0.3929 | 0.4361 | 0.3981 | 0.0177  | 0.0000  | - |
| 0.0025 | 1   | .   |                             |        |        |        |         |         |   |
| 5436   | CD1 | CD1 | . PHE PHE PHE B B 282 282 . | 0.4949 | 0.3890 | 0.3586 | -0.0146 | -0.0032 |   |
| 0.0078 | 1   | .   |                             |        |        |        |         |         |   |
| 5437   | CE1 | CE1 | . PHE PHE PHE B B 282 282 . | 0.4222 | 0.3744 | 0.3212 | -0.0049 | -0.0096 |   |
| 0.0105 | 1   | .   |                             |        |        |        |         |         |   |
| 5438   | CZ  | CZ  | . PHE PHE PHE B B 282 282 . | 0.4655 | 0.4130 | 0.3901 | -0.0012 | 0.0280  |   |
| 0.0034 | 1   | .   |                             |        |        |        |         |         |   |
| 5439   | CE2 | CE2 | . PHE PHE PHE B B 282 282 . | 0.4548 | 0.4190 | 0.4264 | -0.0068 | 0.0333  | - |
| 0.0067 | 1   | .   |                             |        |        |        |         |         |   |
| 5440   | CD2 | CD2 | . PHE PHE PHE B B 282 282 . | 0.4495 | 0.4381 | 0.4300 | -0.0141 | -0.0008 |   |
| 0.0100 | 1   | .   |                             |        |        |        |         |         |   |
| 5441   | C   | C   | . PHE PHE PHE B B 282 282 . | 0.4132 | 0.4304 | 0.4028 | 0.0238  | 0.0155  | - |
| 0.0036 | 1   | .   |                             |        |        |        |         |         |   |
| 5442   | O   | O   | . PHE PHE PHE B B 282 282 . | 0.4139 | 0.4505 | 0.4055 | 0.0439  | 0.0229  |   |
| 0.0057 | 1   | .   |                             |        |        |        |         |         |   |

|        |     |     |                             |        |        |        |         |         |   |
|--------|-----|-----|-----------------------------|--------|--------|--------|---------|---------|---|
| 5443   | N   | N   | . VAL VAL VAL B B 283 283 . | 0.4008 | 0.4293 | 0.4000 | 0.0204  | 0.0106  |   |
| 0.0031 | 1   | .   |                             |        |        |        |         |         |   |
| 5444   | CA  | CA  | . VAL VAL VAL B B 283 283 . | 0.4108 | 0.4128 | 0.4139 | 0.0052  | 0.0219  |   |
| 0.0019 | 1   | .   |                             |        |        |        |         |         |   |
| 5445   | CB  | CB  | . VAL VAL VAL B B 283 283 . | 0.4083 | 0.4107 | 0.4207 | -0.0073 | 0.0225  | - |
| 0.0043 | 1   | .   |                             |        |        |        |         |         |   |
| 5446   | CG1 | CG1 | . VAL VAL VAL B B 283 283 . | 0.4337 | 0.4326 | 0.3983 | -0.0113 | 0.0193  | - |
| 0.0128 | 1   | .   |                             |        |        |        |         |         |   |
| 5447   | CG2 | CG2 | . VAL VAL VAL B B 283 283 . | 0.3829 | 0.3842 | 0.4186 | 0.0060  | 0.0520  |   |
| 0.0363 | 1   | .   |                             |        |        |        |         |         |   |
| 5448   | C   | C   | . VAL VAL VAL B B 283 283 . | 0.4246 | 0.4210 | 0.4165 | -0.0047 | 0.0223  |   |
| 0.0005 | 1   | .   |                             |        |        |        |         |         |   |
| 5449   | O   | O   | . VAL VAL VAL B B 283 283 . | 0.4239 | 0.4107 | 0.4059 | -0.0110 | 0.0353  | - |
| 0.0117 | 1   | .   |                             |        |        |        |         |         |   |
| 5450   | N   | N   | . ARG ARG ARG B B 284 284 . | 0.4379 | 0.4353 | 0.4294 | -0.0078 | 0.0207  |   |
| 0.0062 | 1   | .   |                             |        |        |        |         |         |   |
| 5451   | CA  | CA  | . ARG ARG ARG B B 284 284 . | 0.4443 | 0.4280 | 0.4411 | 0.0023  | 0.0141  |   |
| 0.0071 | 1   | .   |                             |        |        |        |         |         |   |
| 5452   | CB  | CB  | . ARG ARG ARG B B 284 284 . | 0.4608 | 0.4428 | 0.4490 | 0.0023  | 0.0242  |   |
| 0.0033 | 1   | .   |                             |        |        |        |         |         |   |
| 5453   | CG  | CG  | . ARG ARG ARG B B 284 284 . | 0.4530 | 0.4659 | 0.4526 | -0.0088 | 0.0237  |   |
| 0.0163 | 1   | .   |                             |        |        |        |         |         |   |
| 5454   | CD  | CD  | . ARG ARG ARG B B 284 284 . | 0.5114 | 0.4984 | 0.4870 | -0.0183 | 0.0060  |   |
| 0.0070 | 1   | .   |                             |        |        |        |         |         |   |
| 5455   | NE  | NE  | . ARG ARG ARG B B 284 284 . | 0.5297 | 0.5279 | 0.5389 | 0.0008  | 0.0033  |   |
| 0.0327 | 1   | .   |                             |        |        |        |         |         |   |
| 5456   | CZ  | CZ  | . ARG ARG ARG B B 284 284 . | 0.5610 | 0.5712 | 0.5145 | 0.0356  | 0.0160  |   |
| 0.0111 | 1   | .   |                             |        |        |        |         |         |   |
| 5457   | NH1 | NH1 | . ARG ARG ARG B B 284 284 . | 0.5306 | 0.5590 | 0.5234 | 0.0049  | 0.0456  |   |
| 0.0079 | 1   | .   |                             |        |        |        |         |         |   |
| 5458   | NH2 | NH2 | . ARG ARG ARG B B 284 284 . | 0.6399 | 0.5755 | 0.5198 | 0.0586  | 0.0127  | - |
| 0.0122 | 1   | .   |                             |        |        |        |         |         |   |
| 5459   | C   | C   | . ARG ARG ARG B B 284 284 . | 0.4556 | 0.4245 | 0.4399 | 0.0025  | 0.0038  |   |
| 0.0093 | 1   | .   |                             |        |        |        |         |         |   |
| 5460   | O   | O   | . ARG ARG ARG B B 284 284 . | 0.4876 | 0.4241 | 0.4468 | 0.0180  | -0.0011 |   |
| 0.0249 | 1   | .   |                             |        |        |        |         |         |   |
| 5461   | N   | N   | . ASP ASP ASP B B 285 285 . | 0.4390 | 0.4229 | 0.4324 | 0.0050  | 0.0029  |   |
| 0.0177 | 1   | .   |                             |        |        |        |         |         |   |
| 5462   | CA  | CA  | . ASP ASP ASP B B 285 285 . | 0.4035 | 0.4214 | 0.4319 | -0.0078 | 0.0050  |   |
| 0.0098 | 1   | .   |                             |        |        |        |         |         |   |
| 5463   | CB  | CB  | . ASP ASP ASP B B 285 285 . | 0.4294 | 0.4303 | 0.4385 | -0.0090 | 0.0002  |   |
| 0.0000 | 1   | .   |                             |        |        |        |         |         |   |
| 5464   | CG  | CG  | . ASP ASP ASP B B 285 285 . | 0.3779 | 0.4621 | 0.4575 | -0.0195 | 0.0237  | - |
| 0.0277 | 1   | .   |                             |        |        |        |         |         |   |
| 5465   | OD1 | OD1 | . ASP ASP ASP B B 285 285 . | 0.3203 | 0.5045 | 0.4698 | 0.0239  | 0.0330  | - |
| 0.0718 | 1   | .   |                             |        |        |        |         |         |   |
| 5466   | OD2 | OD2 | . ASP ASP ASP B B 285 285 . | 0.4134 | 0.4795 | 0.5915 | -0.0253 | 0.0410  | - |
| 0.0523 | 1   | .   |                             |        |        |        |         |         |   |
| 5467   | C   | C   | . ASP ASP ASP B B 285 285 . | 0.3844 | 0.4098 | 0.4069 | 0.0017  | 0.0016  |   |
| 0.0091 | 1   | .   |                             |        |        |        |         |         |   |
| 5468   | O   | O   | . ASP ASP ASP B B 285 285 . | 0.3565 | 0.3973 | 0.4151 | 0.0068  | 0.0151  |   |
| 0.0121 | 1   | .   |                             |        |        |        |         |         |   |
| 5469   | N   | N   | . TYR TYR TYR B B 286 286 . | 0.3569 | 0.3885 | 0.3880 | -0.0059 | -0.0034 |   |
| 0.0056 | 1   | .   |                             |        |        |        |         |         |   |
| 5470   | CA  | CA  | . TYR TYR TYR B B 286 286 . | 0.3372 | 0.3755 | 0.3739 | -0.0005 | -0.0027 |   |
| 0.0021 | 1   | .   |                             |        |        |        |         |         |   |
| 5471   | CB  | CB  | . TYR TYR TYR B B 286 286 . | 0.3565 | 0.3649 | 0.3907 | -0.0042 | -0.0085 |   |
| 0.0081 | 1   | .   |                             |        |        |        |         |         |   |
| 5472   | CG  | CG  | . TYR TYR TYR B B 286 286 . | 0.3522 | 0.4034 | 0.4009 | 0.0051  | -0.0120 | - |
| 0.0067 | 1   | .   |                             |        |        |        |         |         |   |



|        |     |     |                             |        |        |        |         |         |   |
|--------|-----|-----|-----------------------------|--------|--------|--------|---------|---------|---|
| 5503   | CA  | CA  | . SER SER SER B B 290 290 . | 0.3222 | 0.3305 | 0.3210 | 0.0091  | -0.0027 |   |
| 0.0047 | 1   | .   |                             |        |        |        |         |         |   |
| 5504   | CB  | CB  | . SER SER SER B B 290 290 . | 0.3493 | 0.3321 | 0.3169 | 0.0229  | 0.0069  |   |
| 0.0191 | 1   | .   |                             |        |        |        |         |         |   |
| 5505   | OG  | OG  | . SER SER SER B B 290 290 . | 0.3013 | 0.3384 | 0.3373 | 0.0198  | 0.0194  |   |
| 0.0260 | 1   | .   |                             |        |        |        |         |         |   |
| 5506   | C   | C   | . SER SER SER B B 290 290 . | 0.3206 | 0.3343 | 0.3131 | 0.0113  | -0.0098 |   |
| 0.0018 | 1   | .   |                             |        |        |        |         |         |   |
| 5507   | O   | O   | . SER SER SER B B 290 290 . | 0.3311 | 0.3578 | 0.3461 | 0.0079  | -0.0202 | - |
| 0.0069 | 1   | .   |                             |        |        |        |         |         |   |
| 5508   | N   | N   | . ILE ILE ILE B B 291 291 . | 0.2863 | 0.2992 | 0.2825 | 0.0136  | -0.0032 | - |
| 0.0020 | 1   | .   |                             |        |        |        |         |         |   |
| 5509   | CA  | CA  | . ILE ILE ILE B B 291 291 . | 0.2842 | 0.3077 | 0.2779 | 0.0157  | -0.0019 | - |
| 0.0093 | 1   | .   |                             |        |        |        |         |         |   |
| 5510   | CB  | CB  | . ILE ILE ILE B B 291 291 . | 0.2679 | 0.2794 | 0.2891 | 0.0107  | 0.0063  | - |
| 0.0056 | 1   | .   |                             |        |        |        |         |         |   |
| 5511   | CG1 | CG1 | . ILE ILE ILE B B 291 291 . | 0.2386 | 0.3063 | 0.2943 | 0.0261  | -0.0114 | - |
| 0.0056 | 1   | .   |                             |        |        |        |         |         |   |
| 5512   | CD1 | CD1 | . ILE ILE ILE B B 291 291 . | 0.0406 | 0.3071 | 0.3536 | 0.0569  | -0.0309 |   |
| 0.0201 | 1   | .   |                             |        |        |        |         |         |   |
| 5513   | CG2 | CG2 | . ILE ILE ILE B B 291 291 . | 0.3185 | 0.2585 | 0.2132 | 0.0659  | -0.0013 | - |
| 0.0344 | 1   | .   |                             |        |        |        |         |         |   |
| 5514   | C   | C   | . ILE ILE ILE B B 291 291 . | 0.2821 | 0.3004 | 0.2811 | 0.0201  | -0.0032 | - |
| 0.0122 | 1   | .   |                             |        |        |        |         |         |   |
| 5515   | O   | O   | . ILE ILE ILE B B 291 291 . | 0.2920 | 0.3020 | 0.2602 | 0.0144  | -0.0110 | - |
| 0.0339 | 1   | .   |                             |        |        |        |         |         |   |
| 5516   | N   | N   | . GLU GLU GLU B B 292 292 . | 0.2857 | 0.3106 | 0.2928 | 0.0176  | -0.0012 | - |
| 0.0114 | 1   | .   |                             |        |        |        |         |         |   |
| 5517   | CA  | CA  | . GLU GLU GLU B B 292 292 . | 0.2884 | 0.3165 | 0.2833 | 0.0033  | 0.0085  | - |
| 0.0021 | 1   | .   |                             |        |        |        |         |         |   |
| 5518   | CB  | CB  | . GLU GLU GLU B B 292 292 . | 0.2834 | 0.2931 | 0.2766 | -0.0036 | 0.0011  |   |
| 0.0116 | 1   | .   |                             |        |        |        |         |         |   |
| 5519   | CG  | CG  | . GLU GLU GLU B B 292 292 . | 0.3076 | 0.2998 | 0.2831 | 0.0257  | 0.0165  |   |
| 0.0218 | 1   | .   |                             |        |        |        |         |         |   |
| 5520   | CD  | CD  | . GLU GLU GLU B B 292 292 . | 0.3067 | 0.3427 | 0.3228 | 0.0241  | 0.0088  | - |
| 0.0056 | 1   | .   |                             |        |        |        |         |         |   |
| 5521   | OE1 | OE1 | . GLU GLU GLU B B 292 292 . | 0.3006 | 0.3658 | 0.3705 | 0.0670  | 0.0257  | - |
| 0.0289 | 1   | .   |                             |        |        |        |         |         |   |
| 5522   | OE2 | OE2 | . GLU GLU GLU B B 292 292 . | 0.3179 | 0.2919 | 0.2489 | -0.0222 | 0.0213  | - |
| 0.0603 | 1   | .   |                             |        |        |        |         |         |   |
| 5523   | C   | C   | . GLU GLU GLU B B 292 292 . | 0.2894 | 0.3049 | 0.2752 | 0.0002  | 0.0091  |   |
| 0.0067 | 1   | .   |                             |        |        |        |         |         |   |
| 5524   | O   | O   | . GLU GLU GLU B B 292 292 . | 0.3021 | 0.3468 | 0.2639 | 0.0070  | 0.0101  |   |
| 0.0067 | 1   | .   |                             |        |        |        |         |         |   |
| 5525   | N   | N   | . ASP ASP ASP B B 293 293 . | 0.2675 | 0.3002 | 0.2684 | 0.0033  | 0.0189  |   |
| 0.0030 | 1   | .   |                             |        |        |        |         |         |   |
| 5526   | CA  | CA  | . ASP ASP ASP B B 293 293 . | 0.2676 | 0.2816 | 0.2725 | -0.0127 | 0.0108  |   |
| 0.0009 | 1   | .   |                             |        |        |        |         |         |   |
| 5527   | CB  | CB  | . ASP ASP ASP B B 293 293 . | 0.2740 | 0.2688 | 0.2773 | -0.0083 | 0.0088  | - |
| 0.0021 | 1   | .   |                             |        |        |        |         |         |   |
| 5528   | CG  | CG  | . ASP ASP ASP B B 293 293 . | 0.2672 | 0.2756 | 0.2716 | -0.0112 | -0.0154 |   |
| 0.0024 | 1   | .   |                             |        |        |        |         |         |   |
| 5529   | OD1 | OD1 | . ASP ASP ASP B B 293 293 . | 0.2918 | 0.3435 | 0.2925 | 0.0186  | -0.0463 |   |
| 0.0102 | 1   | .   |                             |        |        |        |         |         |   |
| 5530   | OD2 | OD2 | . ASP ASP ASP B B 293 293 . | 0.3098 | 0.3970 | 0.3141 | 0.0059  | -0.0123 | - |
| 0.0504 | 1   | .   |                             |        |        |        |         |         |   |
| 5531   | C   | C   | . ASP ASP ASP B B 293 293 . | 0.2726 | 0.2762 | 0.2676 | -0.0113 | 0.0059  | - |
| 0.0003 | 1   | .   |                             |        |        |        |         |         |   |
| 5532   | O   | O   | . ASP ASP ASP B B 293 293 . | 0.2701 | 0.3023 | 0.2955 | -0.0093 | 0.0178  |   |
| 0.0103 | 1   | .   |                             |        |        |        |         |         |   |

|        |     |     |                             |        |        |        |         |         |   |
|--------|-----|-----|-----------------------------|--------|--------|--------|---------|---------|---|
| 5533   | N   | N   | . PRO PRO PRO B B 294 294 . | 0.2809 | 0.2765 | 0.2682 | -0.0132 | 0.0088  |   |
| 0.0058 | 1   | .   |                             |        |        |        |         |         |   |
| 5534   | CA  | CA  | . PRO PRO PRO B B 294 294 . | 0.2798 | 0.2789 | 0.2704 | -0.0061 | 0.0015  |   |
| 0.0001 | 1   | .   |                             |        |        |        |         |         |   |
| 5535   | CB  | CB  | . PRO PRO PRO B B 294 294 . | 0.2830 | 0.2683 | 0.2598 | 0.0000  | 0.0057  | - |
| 0.0027 | 1   | .   |                             |        |        |        |         |         |   |
| 5536   | CG  | CG  | . PRO PRO PRO B B 294 294 . | 0.3015 | 0.2728 | 0.2436 | -0.0155 | -0.0031 | - |
| 0.0024 | 1   | .   |                             |        |        |        |         |         |   |
| 5537   | CD  | CD  | . PRO PRO PRO B B 294 294 . | 0.2637 | 0.2710 | 0.2598 | -0.0235 | 0.0035  |   |
| 0.0087 | 1   | .   |                             |        |        |        |         |         |   |
| 5538   | C   | C   | . PRO PRO PRO B B 294 294 . | 0.2823 | 0.2940 | 0.2711 | -0.0132 | 0.0025  |   |
| 0.0011 | 1   | .   |                             |        |        |        |         |         |   |
| 5539   | O   | O   | . PRO PRO PRO B B 294 294 . | 0.2775 | 0.3335 | 0.2974 | -0.0175 | 0.0150  |   |
| 0.0110 | 1   | .   |                             |        |        |        |         |         |   |
| 5540   | N   | N   | . PHE PHE PHE B B 295 295 . | 0.2737 | 0.2852 | 0.2511 | 0.0078  | -0.0031 |   |
| 0.0080 | 1   | .   |                             |        |        |        |         |         |   |
| 5541   | CA  | CA  | . PHE PHE PHE B B 295 295 . | 0.2907 | 0.2921 | 0.2694 | 0.0038  | -0.0016 |   |
| 0.0150 | 1   | .   |                             |        |        |        |         |         |   |
| 5542   | CB  | CB  | . PHE PHE PHE B B 295 295 . | 0.3138 | 0.2990 | 0.2571 | 0.0037  | 0.0088  |   |
| 0.0062 | 1   | .   |                             |        |        |        |         |         |   |
| 5543   | CG  | CG  | . PHE PHE PHE B B 295 295 . | 0.3058 | 0.3136 | 0.2250 | -0.0103 | 0.0000  |   |
| 0.0148 | 1   | .   |                             |        |        |        |         |         |   |
| 5544   | CD1 | CD1 | . PHE PHE PHE B B 295 295 . | 0.2904 | 0.3448 | 0.2533 | 0.0204  | -0.0163 | - |
| 0.0107 | 1   | .   |                             |        |        |        |         |         |   |
| 5545   | CE1 | CE1 | . PHE PHE PHE B B 295 295 . | 0.2821 | 0.3544 | 0.2315 | 0.0370  | -0.0380 |   |
| 0.0180 | 1   | .   |                             |        |        |        |         |         |   |
| 5546   | CZ  | CZ  | . PHE PHE PHE B B 295 295 . | 0.2964 | 0.3052 | 0.2612 | 0.0038  | -0.0138 |   |
| 0.0145 | 1   | .   |                             |        |        |        |         |         |   |
| 5547   | CE2 | CE2 | . PHE PHE PHE B B 295 295 . | 0.2881 | 0.3242 | 0.2327 | 0.0130  | -0.0496 |   |
| 0.0075 | 1   | .   |                             |        |        |        |         |         |   |
| 5548   | CD2 | CD2 | . PHE PHE PHE B B 295 295 . | 0.2697 | 0.2908 | 0.2296 | 0.0067  | -0.0020 |   |
| 0.0083 | 1   | .   |                             |        |        |        |         |         |   |
| 5549   | C   | C   | . PHE PHE PHE B B 295 295 . | 0.3009 | 0.2927 | 0.2802 | 0.0044  | 0.0032  |   |
| 0.0110 | 1   | .   |                             |        |        |        |         |         |   |
| 5550   | O   | O   | . PHE PHE PHE B B 295 295 . | 0.2998 | 0.2883 | 0.3267 | 0.0311  | 0.0057  |   |
| 0.0249 | 1   | .   |                             |        |        |        |         |         |   |
| 5551   | N   | N   | . ASP ASP ASP B B 296 296 . | 0.2927 | 0.3136 | 0.2969 | -0.0016 | -0.0051 |   |
| 0.0012 | 1   | .   |                             |        |        |        |         |         |   |
| 5552   | CA  | CA  | . ASP ASP ASP B B 296 296 . | 0.3086 | 0.3131 | 0.3051 | 0.0010  | -0.0073 | - |
| 0.0014 | 1   | .   |                             |        |        |        |         |         |   |
| 5553   | CB  | CB  | . ASP ASP ASP B B 296 296 . | 0.2967 | 0.3236 | 0.3071 | -0.0079 | -0.0130 |   |
| 0.0008 | 1   | .   |                             |        |        |        |         |         |   |
| 5554   | CG  | CG  | . ASP ASP ASP B B 296 296 . | 0.3417 | 0.3144 | 0.3308 | 0.0238  | -0.0205 | - |
| 0.0135 | 1   | .   |                             |        |        |        |         |         |   |
| 5555   | OD1 | OD1 | . ASP ASP ASP B B 296 296 . | 0.3572 | 0.3331 | 0.3624 | 0.0881  | -0.0319 | - |
| 0.0531 | 1   | .   |                             |        |        |        |         |         |   |
| 5556   | OD2 | OD2 | . ASP ASP ASP B B 296 296 . | 0.3536 | 0.3914 | 0.3704 | 0.0181  | -0.0277 | - |
| 0.0079 | 1   | .   |                             |        |        |        |         |         |   |
| 5557   | C   | C   | . ASP ASP ASP B B 296 296 . | 0.3125 | 0.3228 | 0.2996 | -0.0159 | -0.0060 | - |
| 0.0019 | 1   | .   |                             |        |        |        |         |         |   |
| 5558   | O   | O   | . ASP ASP ASP B B 296 296 . | 0.3368 | 0.3520 | 0.3261 | -0.0197 | -0.0070 |   |
| 0.0106 | 1   | .   |                             |        |        |        |         |         |   |
| 5559   | N   | N   | . GLN GLN GLN B B 297 297 . | 0.3117 | 0.3276 | 0.3114 | -0.0099 | -0.0039 | - |
| 0.0103 | 1   | .   |                             |        |        |        |         |         |   |
| 5560   | CA  | CA  | . GLN GLN GLN B B 297 297 . | 0.3330 | 0.3207 | 0.3040 | -0.0169 | 0.0037  | - |
| 0.0130 | 1   | .   |                             |        |        |        |         |         |   |
| 5561   | CB  | CB  | . GLN GLN GLN B B 297 297 . | 0.3471 | 0.3130 | 0.3060 | -0.0140 | 0.0246  | - |
| 0.0036 | 1   | .   |                             |        |        |        |         |         |   |
| 5562   | CG  | CG  | . GLN GLN GLN B B 297 297 . | 0.3180 | 0.3267 | 0.2736 | -0.0451 | 0.0195  | - |
| 0.0208 | 1   | .   |                             |        |        |        |         |         |   |







|        |     |     |                             |        |        |        |         |         |   |
|--------|-----|-----|-----------------------------|--------|--------|--------|---------|---------|---|
| 5623   | CA  | CA  | . SER SER SER B B 304 304 . | 0.3693 | 0.3500 | 0.3575 | 0.0079  | -0.0010 |   |
| 0.0118 | 1   | .   |                             |        |        |        |         |         |   |
| 5624   | CB  | CB  | . SER SER SER B B 304 304 . | 0.3581 | 0.3368 | 0.3680 | 0.0163  | 0.0006  |   |
| 0.0186 | 1   | .   |                             |        |        |        |         |         |   |
| 5625   | OG  | OG  | . SER SER SER B B 304 304 . | 0.4028 | 0.3337 | 0.4013 | 0.0278  | 0.0044  |   |
| 0.0005 | 1   | .   |                             |        |        |        |         |         |   |
| 5626   | C   | C   | . SER SER SER B B 304 304 . | 0.3828 | 0.3570 | 0.3538 | 0.0056  | 0.0021  |   |
| 0.0080 | 1   | .   |                             |        |        |        |         |         |   |
| 5627   | O   | O   | . SER SER SER B B 304 304 . | 0.4128 | 0.3741 | 0.3275 | 0.0092  | 0.0055  |   |
| 0.0195 | 1   | .   |                             |        |        |        |         |         |   |
| 5628   | N   | N   | . LYS LYS LYS B B 305 305 . | 0.3826 | 0.3791 | 0.3626 | 0.0078  | 0.0036  |   |
| 0.0126 | 1   | .   |                             |        |        |        |         |         |   |
| 5629   | CA  | CA  | . LYS LYS LYS B B 305 305 . | 0.3811 | 0.3962 | 0.3856 | 0.0072  | 0.0078  |   |
| 0.0035 | 1   | .   |                             |        |        |        |         |         |   |
| 5630   | CB  | CB  | . LYS LYS LYS B B 305 305 . | 0.4029 | 0.4078 | 0.4177 | 0.0057  | 0.0134  |   |
| 0.0025 | 1   | .   |                             |        |        |        |         |         |   |
| 5631   | CG  | CG  | . LYS LYS LYS B B 305 305 . | 0.4070 | 0.4606 | 0.4744 | 0.0018  | 0.0398  |   |
| 0.0064 | 1   | .   |                             |        |        |        |         |         |   |
| 5632   | CD  | CD  | . LYS LYS LYS B B 305 305 . | 0.4785 | 0.5043 | 0.5454 | -0.0458 | 0.0229  |   |
| 0.0089 | 1   | .   |                             |        |        |        |         |         |   |
| 5633   | CE  | CE  | . LYS LYS LYS B B 305 305 . | 0.5482 | 0.5384 | 0.6016 | -0.0687 | 0.0461  |   |
| 0.0410 | 1   | .   |                             |        |        |        |         |         |   |
| 5634   | NZ  | NZ  | . LYS LYS LYS B B 305 305 . | 0.6600 | 0.5950 | 0.7146 | -0.0836 | 0.0663  |   |
| 0.0629 | 1   | .   |                             |        |        |        |         |         |   |
| 5635   | C   | C   | . LYS LYS LYS B B 305 305 . | 0.4015 | 0.3915 | 0.3671 | 0.0034  | 0.0064  |   |
| 0.0008 | 1   | .   |                             |        |        |        |         |         |   |
| 5636   | O   | O   | . LYS LYS LYS B B 305 305 . | 0.4071 | 0.3985 | 0.3375 | -0.0039 | 0.0143  | - |
| 0.0063 | 1   | .   |                             |        |        |        |         |         |   |
| 5637   | N   | N   | . PHE PHE PHE B B 306 306 . | 0.3936 | 0.3961 | 0.3587 | 0.0097  | 0.0020  | - |
| 0.0028 | 1   | .   |                             |        |        |        |         |         |   |
| 5638   | CA  | CA  | . PHE PHE PHE B B 306 306 . | 0.3721 | 0.3802 | 0.3471 | 0.0085  | -0.0027 | - |
| 0.0040 | 1   | .   |                             |        |        |        |         |         |   |
| 5639   | CB  | CB  | . PHE PHE PHE B B 306 306 . | 0.3662 | 0.3824 | 0.3521 | 0.0017  | -0.0074 | - |
| 0.0089 | 1   | .   |                             |        |        |        |         |         |   |
| 5640   | CG  | CG  | . PHE PHE PHE B B 306 306 . | 0.3584 | 0.3787 | 0.3680 | 0.0162  | 0.0052  | - |
| 0.0251 | 1   | .   |                             |        |        |        |         |         |   |
| 5641   | CD1 | CD1 | . PHE PHE PHE B B 306 306 . | 0.3675 | 0.4189 | 0.3874 | 0.0462  | 0.0153  | - |
| 0.0430 | 1   | .   |                             |        |        |        |         |         |   |
| 5642   | CE1 | CE1 | . PHE PHE PHE B B 306 306 . | 0.3248 | 0.4311 | 0.4034 | 0.0516  | 0.0442  | - |
| 0.0148 | 1   | .   |                             |        |        |        |         |         |   |
| 5643   | CZ  | CZ  | . PHE PHE PHE B B 306 306 . | 0.3781 | 0.4298 | 0.4384 | 0.0184  | 0.0405  | - |
| 0.0186 | 1   | .   |                             |        |        |        |         |         |   |
| 5644   | CE2 | CE2 | . PHE PHE PHE B B 306 306 . | 0.3668 | 0.4393 | 0.4554 | 0.0560  | 0.0202  | - |
| 0.0296 | 1   | .   |                             |        |        |        |         |         |   |
| 5645   | CD2 | CD2 | . PHE PHE PHE B B 306 306 . | 0.3717 | 0.3806 | 0.3839 | 0.0224  | 0.0069  | - |
| 0.0274 | 1   | .   |                             |        |        |        |         |         |   |
| 5646   | C   | C   | . PHE PHE PHE B B 306 306 . | 0.3610 | 0.3788 | 0.3331 | 0.0130  | -0.0119 | - |
| 0.0098 | 1   | .   |                             |        |        |        |         |         |   |
| 5647   | O   | O   | . PHE PHE PHE B B 306 306 . | 0.3578 | 0.3800 | 0.3493 | 0.0237  | -0.0151 | - |
| 0.0163 | 1   | .   |                             |        |        |        |         |         |   |
| 5648   | N   | N   | . THR THR THR B B 307 307 . | 0.3433 | 0.3658 | 0.3195 | 0.0019  | -0.0018 | - |
| 0.0015 | 1   | .   |                             |        |        |        |         |         |   |
| 5649   | CA  | CA  | . THR THR THR B B 307 307 . | 0.3649 | 0.3623 | 0.3422 | -0.0026 | 0.0044  | - |
| 0.0007 | 1   | .   |                             |        |        |        |         |         |   |
| 5650   | CB  | CB  | . THR THR THR B B 307 307 . | 0.3534 | 0.3632 | 0.3545 | 0.0015  | -0.0059 | - |
| 0.0034 | 1   | .   |                             |        |        |        |         |         |   |
| 5651   | OG1 | OG1 | . THR THR THR B B 307 307 . | 0.3422 | 0.3362 | 0.3669 | -0.0221 | 0.0223  | - |
| 0.0193 | 1   | .   |                             |        |        |        |         |         |   |
| 5652   | CG2 | CG2 | . THR THR THR B B 307 307 . | 0.3690 | 0.3503 | 0.3873 | 0.0002  | -0.0186 | - |
| 0.0019 | 1   | .   |                             |        |        |        |         |         |   |

|        |     |     |                             |        |        |        |         |         |   |
|--------|-----|-----|-----------------------------|--------|--------|--------|---------|---------|---|
| 5653   | C   | C   | . THR THR THR B B 307 307 . | 0.3681 | 0.3750 | 0.3571 | -0.0005 | 0.0021  |   |
| 0.0061 | 1   | .   |                             |        |        |        |         |         |   |
| 5654   | O   | O   | . THR THR THR B B 307 307 . | 0.3871 | 0.3706 | 0.3351 | -0.0163 | 0.0045  |   |
| 0.0000 | 1   | .   |                             |        |        |        |         |         |   |
| 5655   | N   | N   | . ALA ALA ALA B B 308 308 . | 0.3493 | 0.3855 | 0.3666 | 0.0036  | 0.0041  |   |
| 0.0143 | 1   | .   |                             |        |        |        |         |         |   |
| 5656   | CA  | CA  | . ALA ALA ALA B B 308 308 . | 0.3554 | 0.3847 | 0.3705 | 0.0150  | 0.0230  |   |
| 0.0094 | 1   | .   |                             |        |        |        |         |         |   |
| 5657   | CB  | CB  | . ALA ALA ALA B B 308 308 . | 0.3702 | 0.4062 | 0.3799 | 0.0171  | 0.0246  |   |
| 0.0113 | 1   | .   |                             |        |        |        |         |         |   |
| 5658   | C   | C   | . ALA ALA ALA B B 308 308 . | 0.3696 | 0.3924 | 0.3801 | 0.0131  | 0.0176  |   |
| 0.0080 | 1   | .   |                             |        |        |        |         |         |   |
| 5659   | O   | O   | . ALA ALA ALA B B 308 308 . | 0.3527 | 0.4362 | 0.4003 | 0.0253  | 0.0305  |   |
| 0.0097 | 1   | .   |                             |        |        |        |         |         |   |
| 5660   | N   | N   | . ASN ASN ASN B B 309 309 . | 0.3590 | 0.3719 | 0.3547 | 0.0074  | 0.0038  |   |
| 0.0099 | 1   | .   |                             |        |        |        |         |         |   |
| 5661   | CA  | CA  | . ASN ASN ASN B B 309 309 . | 0.3874 | 0.3938 | 0.3649 | 0.0073  | 0.0075  |   |
| 0.0144 | 1   | .   |                             |        |        |        |         |         |   |
| 5662   | CB  | CB  | . ASN ASN ASN B B 309 309 . | 0.4253 | 0.4187 | 0.3895 | 0.0099  | 0.0195  |   |
| 0.0162 | 1   | .   |                             |        |        |        |         |         |   |
| 5663   | CG  | CG  | . ASN ASN ASN B B 309 309 . | 0.5046 | 0.5254 | 0.4906 | 0.0366  | 0.0364  |   |
| 0.0627 | 1   | .   |                             |        |        |        |         |         |   |
| 5664   | OD1 | OD1 | . ASN ASN ASN B B 309 309 . | 0.5504 | 0.6953 | 0.6562 | 0.0619  | 0.0667  |   |
| 0.0768 | 1   | .   |                             |        |        |        |         |         |   |
| 5665   | ND2 | ND2 | . ASN ASN ASN B B 309 309 . | 0.5246 | 0.5428 | 0.5621 | 0.0730  | -0.0049 |   |
| 0.1128 | 1   | .   |                             |        |        |        |         |         |   |
| 5666   | C   | C   | . ASN ASN ASN B B 309 309 . | 0.3745 | 0.3726 | 0.3491 | 0.0023  | 0.0094  |   |
| 0.0137 | 1   | .   |                             |        |        |        |         |         |   |
| 5667   | O   | O   | . ASN ASN ASN B B 309 309 . | 0.3820 | 0.3703 | 0.3369 | 0.0014  | 0.0098  |   |
| 0.0232 | 1   | .   |                             |        |        |        |         |         |   |
| 5668   | N   | N   | . VAL VAL VAL B B 310 310 . | 0.3629 | 0.3777 | 0.3513 | 0.0022  | -0.0007 |   |
| 0.0090 | 1   | .   |                             |        |        |        |         |         |   |
| 5669   | CA  | CA  | . VAL VAL VAL B B 310 310 . | 0.3599 | 0.3732 | 0.3193 | -0.0109 | -0.0045 |   |
| 0.0058 | 1   | .   |                             |        |        |        |         |         |   |
| 5670   | CB  | CB  | . VAL VAL VAL B B 310 310 . | 0.3612 | 0.3752 | 0.3293 | -0.0187 | -0.0059 |   |
| 0.0154 | 1   | .   |                             |        |        |        |         |         |   |
| 5671   | CG1 | CG1 | . VAL VAL VAL B B 310 310 . | 0.3991 | 0.4063 | 0.3146 | -0.0284 | -0.0471 |   |
| 0.0019 | 1   | .   |                             |        |        |        |         |         |   |
| 5672   | CG2 | CG2 | . VAL VAL VAL B B 310 310 . | 0.3989 | 0.3449 | 0.2921 | 0.0190  | -0.0189 |   |
| 0.0025 | 1   | .   |                             |        |        |        |         |         |   |
| 5673   | C   | C   | . VAL VAL VAL B B 310 310 . | 0.3556 | 0.3784 | 0.3079 | -0.0060 | -0.0070 | - |
| 0.0029 | 1   | .   |                             |        |        |        |         |         |   |
| 5674   | O   | O   | . VAL VAL VAL B B 310 310 . | 0.3275 | 0.4118 | 0.2850 | -0.0053 | -0.0247 | - |
| 0.0016 | 1   | .   |                             |        |        |        |         |         |   |
| 5675   | N   | N   | . GLY GLY GLY B B 311 311 . | 0.3510 | 0.3688 | 0.2910 | -0.0064 | 0.0012  | - |
| 0.0069 | 1   | .   |                             |        |        |        |         |         |   |
| 5676   | CA  | CA  | . GLY GLY GLY B B 311 311 . | 0.3622 | 0.3777 | 0.3092 | -0.0223 | -0.0028 |   |
| 0.0000 | 1   | .   |                             |        |        |        |         |         |   |
| 5677   | C   | C   | . GLY GLY GLY B B 311 311 . | 0.3578 | 0.3768 | 0.3151 | -0.0240 | -0.0061 |   |
| 0.0034 | 1   | .   |                             |        |        |        |         |         |   |
| 5678   | O   | O   | . GLY GLY GLY B B 311 311 . | 0.3719 | 0.3867 | 0.3167 | -0.0327 | -0.0132 |   |
| 0.0016 | 1   | .   |                             |        |        |        |         |         |   |
| 5679   | N   | N   | . ILE ILE ILE B B 312 312 . | 0.3479 | 0.3602 | 0.3148 | -0.0133 | -0.0082 |   |
| 0.0027 | 1   | .   |                             |        |        |        |         |         |   |
| 5680   | CA  | CA  | . ILE ILE ILE B B 312 312 . | 0.3316 | 0.3474 | 0.3178 | -0.0041 | -0.0077 |   |
| 0.0000 | 1   | .   |                             |        |        |        |         |         |   |
| 5681   | CB  | CB  | . ILE ILE ILE B B 312 312 . | 0.3296 | 0.3405 | 0.3123 | -0.0027 | -0.0108 | - |
| 0.0080 | 1   | .   |                             |        |        |        |         |         |   |
| 5682   | CG1 | CG1 | . ILE ILE ILE B B 312 312 . | 0.3177 | 0.3641 | 0.3392 | -0.0122 | -0.0141 | - |
| 0.0349 | 1   | .   |                             |        |        |        |         |         |   |



|        |     |     |                             |        |        |        |         |         |   |
|--------|-----|-----|-----------------------------|--------|--------|--------|---------|---------|---|
| 5713   | C   | C   | . GLY GLY GLY B B 316 316 . | 0.3184 | 0.3161 | 0.2883 | 0.0022  | -0.0126 |   |
| 0.0121 | 1   | .   |                             |        |        |        |         |         |   |
| 5714   | O   | O   | . GLY GLY GLY B B 316 316 . | 0.3313 | 0.3161 | 0.2522 | 0.0024  | 0.0021  |   |
| 0.0217 | 1   | .   |                             |        |        |        |         |         |   |
| 5715   | N   | N   | . ASP ASP ASP B B 317 317 . | 0.3046 | 0.3124 | 0.2776 | 0.0113  | -0.0185 |   |
| 0.0082 | 1   | .   |                             |        |        |        |         |         |   |
| 5716   | CA  | CA  | . ASP ASP ASP B B 317 317 . | 0.2817 | 0.3055 | 0.2746 | 0.0062  | -0.0099 |   |
| 0.0077 | 1   | .   |                             |        |        |        |         |         |   |
| 5717   | CB  | CB  | . ASP ASP ASP B B 317 317 . | 0.2999 | 0.3062 | 0.2595 | 0.0059  | -0.0131 |   |
| 0.0029 | 1   | .   |                             |        |        |        |         |         |   |
| 5718   | CG  | CG  | . ASP ASP ASP B B 317 317 . | 0.2246 | 0.2967 | 0.2499 | 0.0096  | -0.0127 |   |
| 0.0016 | 1   | .   |                             |        |        |        |         |         |   |
| 5719   | OD1 | OD1 | . ASP ASP ASP B B 317 317 . | 0.1210 | 0.2629 | 0.1797 | 0.0259  | -0.0296 | - |
| 0.0220 | 1   | .   |                             |        |        |        |         |         |   |
| 5720   | OD2 | OD2 | . ASP ASP ASP B B 317 317 . | 0.1400 | 0.1960 | 0.2174 | 0.0067  | 0.0307  |   |
| 0.0047 | 1   | .   |                             |        |        |        |         |         |   |
| 5721   | C   | C   | . ASP ASP ASP B B 317 317 . | 0.2791 | 0.3115 | 0.2574 | 0.0044  | -0.0021 |   |
| 0.0099 | 1   | .   |                             |        |        |        |         |         |   |
| 5722   | O   | O   | . ASP ASP ASP B B 317 317 . | 0.2614 | 0.3498 | 0.2730 | -0.0103 | 0.0053  |   |
| 0.0217 | 1   | .   |                             |        |        |        |         |         |   |
| 5723   | N   | N   | . ASP ASP ASP B B 318 318 . | 0.2785 | 0.3078 | 0.2633 | -0.0014 | 0.0041  |   |
| 0.0135 | 1   | .   |                             |        |        |        |         |         |   |
| 5724   | CA  | CA  | . ASP ASP ASP B B 318 318 . | 0.2954 | 0.3050 | 0.2913 | 0.0030  | 0.0059  |   |
| 0.0115 | 1   | .   |                             |        |        |        |         |         |   |
| 5725   | CB  | CB  | . ASP ASP ASP B B 318 318 . | 0.2942 | 0.2956 | 0.2757 | -0.0156 | 0.0024  |   |
| 0.0068 | 1   | .   |                             |        |        |        |         |         |   |
| 5726   | CG  | CG  | . ASP ASP ASP B B 318 318 . | 0.3136 | 0.3054 | 0.3487 | -0.0147 | 0.0050  |   |
| 0.0112 | 1   | .   |                             |        |        |        |         |         |   |
| 5727   | OD1 | OD1 | . ASP ASP ASP B B 318 318 . | 0.3067 | 0.3018 | 0.2693 | -0.0522 | 0.0452  | - |
| 0.0644 | 1   | .   |                             |        |        |        |         |         |   |
| 5728   | OD2 | OD2 | . ASP ASP ASP B B 318 318 . | 0.3724 | 0.3412 | 0.4114 | -0.0139 | -0.0293 |   |
| 0.0173 | 1   | .   |                             |        |        |        |         |         |   |
| 5729   | C   | C   | . ASP ASP ASP B B 318 318 . | 0.3152 | 0.3168 | 0.3053 | 0.0132  | 0.0060  |   |
| 0.0078 | 1   | .   |                             |        |        |        |         |         |   |
| 5730   | O   | O   | . ASP ASP ASP B B 318 318 . | 0.3623 | 0.3474 | 0.3226 | 0.0139  | 0.0143  |   |
| 0.0207 | 1   | .   |                             |        |        |        |         |         |   |
| 5731   | N   | N   | . LEU LEU LEU B B 319 319 . | 0.3100 | 0.3256 | 0.3297 | 0.0162  | 0.0045  |   |
| 0.0080 | 1   | .   |                             |        |        |        |         |         |   |
| 5732   | CA  | CA  | . LEU LEU LEU B B 319 319 . | 0.3230 | 0.3304 | 0.3270 | 0.0076  | -0.0074 |   |
| 0.0055 | 1   | .   |                             |        |        |        |         |         |   |
| 5733   | CB  | CB  | . LEU LEU LEU B B 319 319 . | 0.3262 | 0.3377 | 0.3163 | 0.0007  | -0.0125 |   |
| 0.0239 | 1   | .   |                             |        |        |        |         |         |   |
| 5734   | CG  | CG  | . LEU LEU LEU B B 319 319 . | 0.3643 | 0.3133 | 0.3041 | 0.0013  | -0.0429 |   |
| 0.0101 | 1   | .   |                             |        |        |        |         |         |   |
| 5735   | CD1 | CD1 | . LEU LEU LEU B B 319 319 . | 0.3294 | 0.2872 | 0.2218 | -0.0281 | -0.0684 |   |
| 0.0379 | 1   | .   |                             |        |        |        |         |         |   |
| 5736   | CD2 | CD2 | . LEU LEU LEU B B 319 319 . | 0.4138 | 0.2509 | 0.3045 | 0.0253  | -0.1205 |   |
| 0.0231 | 1   | .   |                             |        |        |        |         |         |   |
| 5737   | C   | C   | . LEU LEU LEU B B 319 319 . | 0.3170 | 0.3391 | 0.3523 | 0.0004  | -0.0011 |   |
| 0.0091 | 1   | .   |                             |        |        |        |         |         |   |
| 5738   | O   | O   | . LEU LEU LEU B B 319 319 . | 0.3195 | 0.3754 | 0.3511 | -0.0096 | -0.0038 |   |
| 0.0018 | 1   | .   |                             |        |        |        |         |         |   |
| 5739   | N   | N   | . THR THR THR B B 320 320 . | 0.3256 | 0.3517 | 0.3655 | 0.0038  | -0.0002 | - |
| 0.0062 | 1   | .   |                             |        |        |        |         |         |   |
| 5740   | CA  | CA  | . THR THR THR B B 320 320 . | 0.3294 | 0.3562 | 0.3462 | 0.0013  | -0.0055 | - |
| 0.0146 | 1   | .   |                             |        |        |        |         |         |   |
| 5741   | CB  | CB  | . THR THR THR B B 320 320 . | 0.3368 | 0.3576 | 0.3420 | 0.0114  | -0.0112 | - |
| 0.0124 | 1   | .   |                             |        |        |        |         |         |   |
| 5742   | OG1 | OG1 | . THR THR THR B B 320 320 . | 0.4333 | 0.3695 | 0.3320 | 0.0341  | 0.0023  | - |
| 0.0224 | 1   | .   |                             |        |        |        |         |         |   |



|        |     |     |                             |        |        |        |         |         |   |
|--------|-----|-----|-----------------------------|--------|--------|--------|---------|---------|---|
| 5773   | C   | C   | . PRO PRO PRO B B 324 324 . | 0.4206 | 0.4492 | 0.4493 | -0.0085 | 0.0004  | - |
| 0.0022 | 1   | .   |                             |        |        |        |         |         |   |
| 5774   | O   | O   | . PRO PRO PRO B B 324 324 . | 0.4075 | 0.4554 | 0.4346 | -0.0001 | -0.0142 | - |
| 0.0101 | 1   | .   |                             |        |        |        |         |         |   |
| 5775   | N   | N   | . LYS LYS LYS B B 325 325 . | 0.4415 | 0.4736 | 0.4644 | -0.0020 | 0.0034  | - |
| 0.0006 | 1   | .   |                             |        |        |        |         |         |   |
| 5776   | CA  | CA  | . LYS LYS LYS B B 325 325 . | 0.4495 | 0.4864 | 0.4896 | -0.0006 | 0.0067  | - |
| 0.0008 | 1   | .   |                             |        |        |        |         |         |   |
| 5777   | CB  | CB  | . LYS LYS LYS B B 325 325 . | 0.4567 | 0.4920 | 0.5124 | 0.0078  | 0.0011  | - |
| 0.0038 | 1   | .   |                             |        |        |        |         |         |   |
| 5778   | CG  | CG  | . LYS LYS LYS B B 325 325 . | 0.5038 | 0.5728 | 0.5920 | 0.0034  | 0.0192  | - |
| 0.0131 | 1   | .   |                             |        |        |        |         |         |   |
| 5779   | CD  | CD  | . LYS LYS LYS B B 325 325 . | 0.5479 | 0.6125 | 0.6332 | 0.0169  | 0.0356  | - |
| 0.0453 | 1   | .   |                             |        |        |        |         |         |   |
| 5780   | CE  | CE  | . LYS LYS LYS B B 325 325 . | 0.5782 | 0.6704 | 0.6551 | -0.0048 | 0.0415  | - |
| 0.0204 | 1   | .   |                             |        |        |        |         |         |   |
| 5781   | NZ  | NZ  | . LYS LYS LYS B B 325 325 . | 0.5689 | 0.7044 | 0.6940 | -0.0504 | 0.0083  | - |
| 0.0519 | 1   | .   |                             |        |        |        |         |         |   |
| 5782   | C   | C   | . LYS LYS LYS B B 325 325 . | 0.4477 | 0.4827 | 0.4631 | 0.0001  | 0.0096  | - |
| 0.0070 | 1   | .   |                             |        |        |        |         |         |   |
| 5783   | O   | O   | . LYS LYS LYS B B 325 325 . | 0.4645 | 0.5021 | 0.4776 | 0.0095  | 0.0044  | - |
| 0.0127 | 1   | .   |                             |        |        |        |         |         |   |
| 5784   | N   | N   | . ARG ARG ARG B B 326 326 . | 0.4201 | 0.4532 | 0.4349 | 0.0033  | 0.0125  | - |
| 0.0086 | 1   | .   |                             |        |        |        |         |         |   |
| 5785   | CA  | CA  | . ARG ARG ARG B B 326 326 . | 0.4155 | 0.4382 | 0.4155 | -0.0028 | 0.0052  | - |
| 0.0049 | 1   | .   |                             |        |        |        |         |         |   |
| 5786   | CB  | CB  | . ARG ARG ARG B B 326 326 . | 0.4049 | 0.4275 | 0.4004 | -0.0021 | 0.0142  | - |
| 0.0036 | 1   | .   |                             |        |        |        |         |         |   |
| 5787   | CG  | CG  | . ARG ARG ARG B B 326 326 . | 0.3965 | 0.4152 | 0.3983 | -0.0155 | 0.0322  | - |
| 0.0007 | 1   | .   |                             |        |        |        |         |         |   |
| 5788   | CD  | CD  | . ARG ARG ARG B B 326 326 . | 0.3981 | 0.3825 | 0.4075 | -0.0019 | 0.0428  | - |
| 0.0673 | 1   | .   |                             |        |        |        |         |         |   |
| 5789   | NE  | NE  | . ARG ARG ARG B B 326 326 . | 0.3658 | 0.3840 | 0.3926 | 0.0279  | 0.0066  | - |
| 0.0309 | 1   | .   |                             |        |        |        |         |         |   |
| 5790   | CZ  | CZ  | . ARG ARG ARG B B 326 326 . | 0.3650 | 0.3808 | 0.3954 | 0.0533  | 0.0206  | - |
| 0.0371 | 1   | .   |                             |        |        |        |         |         |   |
| 5791   | NH1 | NH1 | . ARG ARG ARG B B 326 326 . | 0.3267 | 0.3857 | 0.3569 | 0.0682  | -0.0117 | - |
| 0.0405 | 1   | .   |                             |        |        |        |         |         |   |
| 5792   | NH2 | NH2 | . ARG ARG ARG B B 326 326 . | 0.3342 | 0.3980 | 0.3469 | 0.0942  | 0.0069  | - |
| 0.0453 | 1   | .   |                             |        |        |        |         |         |   |
| 5793   | C   | C   | . ARG ARG ARG B B 326 326 . | 0.3967 | 0.4236 | 0.4065 | 0.0055  | 0.0048  | - |
| 0.0161 | 1   | .   |                             |        |        |        |         |         |   |
| 5794   | O   | O   | . ARG ARG ARG B B 326 326 . | 0.4046 | 0.4223 | 0.4133 | 0.0001  | -0.0038 | - |
| 0.0300 | 1   | .   |                             |        |        |        |         |         |   |
| 5795   | N   | N   | . ILE ILE ILE B B 327 327 . | 0.3946 | 0.4071 | 0.3814 | -0.0005 | -0.0020 | - |
| 0.0149 | 1   | .   |                             |        |        |        |         |         |   |
| 5796   | CA  | CA  | . ILE ILE ILE B B 327 327 . | 0.3900 | 0.4070 | 0.3861 | -0.0021 | -0.0058 | - |
| 0.0180 | 1   | .   |                             |        |        |        |         |         |   |
| 5797   | CB  | CB  | . ILE ILE ILE B B 327 327 . | 0.3769 | 0.3938 | 0.3687 | 0.0098  | 0.0000  | - |
| 0.0300 | 1   | .   |                             |        |        |        |         |         |   |
| 5798   | CG1 | CG1 | . ILE ILE ILE B B 327 327 . | 0.3760 | 0.4031 | 0.3633 | -0.0293 | -0.0136 | - |
| 0.0172 | 1   | .   |                             |        |        |        |         |         |   |
| 5799   | CD1 | CD1 | . ILE ILE ILE B B 327 327 . | 0.3583 | 0.3432 | 0.2848 | -0.0473 | -0.0872 | - |
| 0.0315 | 1   | .   |                             |        |        |        |         |         |   |
| 5800   | CG2 | CG2 | . ILE ILE ILE B B 327 327 . | 0.4049 | 0.3955 | 0.3779 | 0.0026  | -0.0105 | - |
| 0.0534 | 1   | .   |                             |        |        |        |         |         |   |
| 5801   | C   | C   | . ILE ILE ILE B B 327 327 . | 0.3967 | 0.4081 | 0.3897 | 0.0027  | -0.0092 | - |
| 0.0199 | 1   | .   |                             |        |        |        |         |         |   |
| 5802   | O   | O   | . ILE ILE ILE B B 327 327 . | 0.3941 | 0.4108 | 0.3610 | 0.0096  | -0.0439 | - |
| 0.0266 | 1   | .   |                             |        |        |        |         |         |   |

|        |     |     |                             |        |        |        |         |         |   |
|--------|-----|-----|-----------------------------|--------|--------|--------|---------|---------|---|
| 5803   | N   | N   | . GLU GLU GLU B B 328 328 . | 0.4086 | 0.4229 | 0.4191 | 0.0053  | -0.0091 |   |
| 0.0149 | 1   | .   |                             |        |        |        |         |         |   |
| 5804   | CA  | CA  | . GLU GLU GLU B B 328 328 . | 0.4266 | 0.4497 | 0.4509 | 0.0116  | -0.0017 |   |
| 0.0086 | 1   | .   |                             |        |        |        |         |         |   |
| 5805   | CB  | CB  | . GLU GLU GLU B B 328 328 . | 0.4314 | 0.4799 | 0.4809 | 0.0088  | -0.0009 | - |
| 0.0014 | 1   | .   |                             |        |        |        |         |         |   |
| 5806   | CG  | CG  | . GLU GLU GLU B B 328 328 . | 0.5422 | 0.5631 | 0.5522 | -0.0137 | 0.0075  |   |
| 0.0277 | 1   | .   |                             |        |        |        |         |         |   |
| 5807   | CD  | CD  | . GLU GLU GLU B B 328 328 . | 0.6202 | 0.6777 | 0.6374 | -0.0079 | -0.0146 |   |
| 0.0172 | 1   | .   |                             |        |        |        |         |         |   |
| 5808   | OE1 | OE1 | . GLU GLU GLU B B 328 328 . | 0.7387 | 0.7933 | 0.6770 | 0.0233  | 0.0115  |   |
| 0.0215 | 1   | .   |                             |        |        |        |         |         |   |
| 5809   | OE2 | OE2 | . GLU GLU GLU B B 328 328 . | 0.5853 | 0.6899 | 0.7007 | 0.0230  | -0.0084 |   |
| 0.0623 | 1   | .   |                             |        |        |        |         |         |   |
| 5810   | C   | C   | . GLU GLU GLU B B 328 328 . | 0.4047 | 0.4409 | 0.4430 | 0.0225  | -0.0016 |   |
| 0.0051 | 1   | .   |                             |        |        |        |         |         |   |
| 5811   | O   | O   | . GLU GLU GLU B B 328 328 . | 0.3845 | 0.4412 | 0.4389 | 0.0340  | -0.0086 |   |
| 0.0058 | 1   | .   |                             |        |        |        |         |         |   |
| 5812   | N   | N   | . ARG ARG ARG B B 329 329 . | 0.3897 | 0.4259 | 0.4382 | 0.0294  | -0.0032 |   |
| 0.0056 | 1   | .   |                             |        |        |        |         |         |   |
| 5813   | CA  | CA  | . ARG ARG ARG B B 329 329 . | 0.4003 | 0.4221 | 0.4342 | 0.0213  | -0.0023 |   |
| 0.0058 | 1   | .   |                             |        |        |        |         |         |   |
| 5814   | CB  | CB  | . ARG ARG ARG B B 329 329 . | 0.4294 | 0.4301 | 0.4393 | 0.0108  | -0.0043 |   |
| 0.0085 | 1   | .   |                             |        |        |        |         |         |   |
| 5815   | CG  | CG  | . ARG ARG ARG B B 329 329 . | 0.3843 | 0.4427 | 0.4401 | 0.0001  | 0.0269  |   |
| 0.0007 | 1   | .   |                             |        |        |        |         |         |   |
| 5816   | CD  | CD  | . ARG ARG ARG B B 329 329 . | 0.3828 | 0.4538 | 0.4710 | -0.0366 | 0.0278  | - |
| 0.0034 | 1   | .   |                             |        |        |        |         |         |   |
| 5817   | NE  | NE  | . ARG ARG ARG B B 329 329 . | 0.4763 | 0.4224 | 0.4595 | -0.0182 | 0.0417  |   |
| 0.0013 | 1   | .   |                             |        |        |        |         |         |   |
| 5818   | CZ  | CZ  | . ARG ARG ARG B B 329 329 . | 0.4287 | 0.4374 | 0.4192 | -0.0300 | 0.0198  |   |
| 0.0044 | 1   | .   |                             |        |        |        |         |         |   |
| 5819   | NH1 | NH1 | . ARG ARG ARG B B 329 329 . | 0.4436 | 0.4358 | 0.4003 | 0.0066  | -0.0145 |   |
| 0.0297 | 1   | .   |                             |        |        |        |         |         |   |
| 5820   | NH2 | NH2 | . ARG ARG ARG B B 329 329 . | 0.3561 | 0.4551 | 0.3819 | 0.0291  | 0.0261  |   |
| 0.0109 | 1   | .   |                             |        |        |        |         |         |   |
| 5821   | C   | C   | . ARG ARG ARG B B 329 329 . | 0.4011 | 0.4377 | 0.4302 | 0.0228  | -0.0046 |   |
| 0.0114 | 1   | .   |                             |        |        |        |         |         |   |
| 5822   | O   | O   | . ARG ARG ARG B B 329 329 . | 0.3757 | 0.4493 | 0.4297 | 0.0259  | -0.0163 |   |
| 0.0209 | 1   | .   |                             |        |        |        |         |         |   |
| 5823   | N   | N   | . ALA ALA ALA B B 330 330 . | 0.4009 | 0.4261 | 0.4161 | 0.0298  | -0.0089 |   |
| 0.0107 | 1   | .   |                             |        |        |        |         |         |   |
| 5824   | CA  | CA  | . ALA ALA ALA B B 330 330 . | 0.4012 | 0.4181 | 0.4079 | 0.0172  | -0.0101 |   |
| 0.0088 | 1   | .   |                             |        |        |        |         |         |   |
| 5825   | CB  | CB  | . ALA ALA ALA B B 330 330 . | 0.3858 | 0.3972 | 0.3974 | 0.0277  | -0.0182 |   |
| 0.0061 | 1   | .   |                             |        |        |        |         |         |   |
| 5826   | C   | C   | . ALA ALA ALA B B 330 330 . | 0.4097 | 0.4190 | 0.4072 | 0.0119  | -0.0049 |   |
| 0.0113 | 1   | .   |                             |        |        |        |         |         |   |
| 5827   | O   | O   | . ALA ALA ALA B B 330 330 . | 0.3900 | 0.4061 | 0.3926 | 0.0031  | 0.0011  |   |
| 0.0216 | 1   | .   |                             |        |        |        |         |         |   |
| 5828   | N   | N   | . VAL VAL VAL B B 331 331 . | 0.4112 | 0.4401 | 0.4171 | -0.0003 | -0.0087 |   |
| 0.0091 | 1   | .   |                             |        |        |        |         |         |   |
| 5829   | CA  | CA  | . VAL VAL VAL B B 331 331 . | 0.4341 | 0.4505 | 0.4291 | -0.0103 | -0.0051 |   |
| 0.0055 | 1   | .   |                             |        |        |        |         |         |   |
| 5830   | CB  | CB  | . VAL VAL VAL B B 331 331 . | 0.4447 | 0.4568 | 0.4266 | -0.0116 | -0.0105 |   |
| 0.0059 | 1   | .   |                             |        |        |        |         |         |   |
| 5831   | CG1 | CG1 | . VAL VAL VAL B B 331 331 . | 0.4470 | 0.4765 | 0.4551 | -0.0295 | -0.0269 |   |
| 0.0155 | 1   | .   |                             |        |        |        |         |         |   |
| 5832   | CG2 | CG2 | . VAL VAL VAL B B 331 331 . | 0.4269 | 0.4509 | 0.4608 | -0.0183 | -0.0217 |   |
| 0.0062 | 1   | .   |                             |        |        |        |         |         |   |



|        |     |     |                             |        |        |        |         |         |   |
|--------|-----|-----|-----------------------------|--------|--------|--------|---------|---------|---|
| 5833   | C   | C   | . VAL VAL VAL B B 331 331 . | 0.4411 | 0.4640 | 0.4301 | -0.0019 | -0.0048 |   |
| 0.0027 | 1   | .   |                             |        |        |        |         |         |   |
| 5834   | O   | O   | . VAL VAL VAL B B 331 331 . | 0.4759 | 0.4865 | 0.4208 | -0.0017 | -0.0060 | - |
| 0.0001 | 1   | .   |                             |        |        |        |         |         |   |
| 5835   | N   | N   | . GLU GLU GLU B B 332 332 . | 0.4364 | 0.4491 | 0.4315 | -0.0045 | -0.0024 |   |
| 0.0016 | 1   | .   |                             |        |        |        |         |         |   |
| 5836   | CA  | CA  | . GLU GLU GLU B B 332 332 . | 0.4358 | 0.4610 | 0.4389 | -0.0094 | 0.0023  |   |
| 0.0088 | 1   | .   |                             |        |        |        |         |         |   |
| 5837   | CB  | CB  | . GLU GLU GLU B B 332 332 . | 0.4366 | 0.4722 | 0.4565 | -0.0092 | 0.0068  |   |
| 0.0152 | 1   | .   |                             |        |        |        |         |         |   |
| 5838   | CG  | CG  | . GLU GLU GLU B B 332 332 . | 0.5433 | 0.5742 | 0.5481 | 0.0090  | 0.0058  |   |
| 0.0465 | 1   | .   |                             |        |        |        |         |         |   |
| 5839   | CD  | CD  | . GLU GLU GLU B B 332 332 . | 0.6542 | 0.6530 | 0.6728 | -0.0373 | -0.0189 |   |
| 0.0385 | 1   | .   |                             |        |        |        |         |         |   |
| 5840   | OE1 | OE1 | . GLU GLU GLU B B 332 332 . | 0.7140 | 0.7545 | 0.7344 | -0.0280 | -0.0440 |   |
| 0.0257 | 1   | .   |                             |        |        |        |         |         |   |
| 5841   | OE2 | OE2 | . GLU GLU GLU B B 332 332 . | 0.6783 | 0.6997 | 0.7088 | 0.0090  | -0.0455 |   |
| 0.0653 | 1   | .   |                             |        |        |        |         |         |   |
| 5842   | C   | C   | . GLU GLU GLU B B 332 332 . | 0.4230 | 0.4444 | 0.4186 | -0.0026 | -0.0008 |   |
| 0.0032 | 1   | .   |                             |        |        |        |         |         |   |
| 5843   | O   | O   | . GLU GLU GLU B B 332 332 . | 0.4163 | 0.4517 | 0.4515 | -0.0051 | -0.0006 | - |
| 0.0013 | 1   | .   |                             |        |        |        |         |         |   |
| 5844   | N   | N   | . GLU GLU GLU B B 333 333 . | 0.4074 | 0.4275 | 0.3890 | -0.0030 | -0.0065 |   |
| 0.0066 | 1   | .   |                             |        |        |        |         |         |   |
| 5845   | CA  | CA  | . GLU GLU GLU B B 333 333 . | 0.4213 | 0.4041 | 0.3708 | -0.0008 | -0.0099 |   |
| 0.0098 | 1   | .   |                             |        |        |        |         |         |   |
| 5846   | CB  | CB  | . GLU GLU GLU B B 333 333 . | 0.4522 | 0.4080 | 0.3731 | -0.0031 | -0.0008 |   |
| 0.0091 | 1   | .   |                             |        |        |        |         |         |   |
| 5847   | CG  | CG  | . GLU GLU GLU B B 333 333 . | 0.4789 | 0.4226 | 0.4233 | 0.0144  | 0.0069  | - |
| 0.0076 | 1   | .   |                             |        |        |        |         |         |   |
| 5848   | CD  | CD  | . GLU GLU GLU B B 333 333 . | 0.4521 | 0.4499 | 0.4691 | -0.0152 | -0.0004 | - |
| 0.0033 | 1   | .   |                             |        |        |        |         |         |   |
| 5849   | OE1 | OE1 | . GLU GLU GLU B B 333 333 . | 0.4765 | 0.4357 | 0.4351 | -0.0020 | 0.0255  |   |
| 0.0259 | 1   | .   |                             |        |        |        |         |         |   |
| 5850   | OE2 | OE2 | . GLU GLU GLU B B 333 333 . | 0.4008 | 0.4931 | 0.5247 | 0.0324  | 0.0030  |   |
| 0.0194 | 1   | .   |                             |        |        |        |         |         |   |
| 5851   | C   | C   | . GLU GLU GLU B B 333 333 . | 0.4051 | 0.3973 | 0.3442 | -0.0017 | -0.0110 |   |
| 0.0051 | 1   | .   |                             |        |        |        |         |         |   |
| 5852   | O   | O   | . GLU GLU GLU B B 333 333 . | 0.4089 | 0.4219 | 0.3203 | 0.0123  | -0.0187 |   |
| 0.0264 | 1   | .   |                             |        |        |        |         |         |   |
| 5853   | N   | N   | . LYS LYS LYS B B 334 334 . | 0.4040 | 0.3931 | 0.3416 | 0.0025  | -0.0186 | - |
| 0.0017 | 1   | .   |                             |        |        |        |         |         |   |
| 5854   | CA  | CA  | . LYS LYS LYS B B 334 334 . | 0.3882 | 0.3829 | 0.3665 | -0.0052 | -0.0136 | - |
| 0.0043 | 1   | .   |                             |        |        |        |         |         |   |
| 5855   | CB  | CB  | . LYS LYS LYS B B 334 334 . | 0.4013 | 0.3867 | 0.3614 | -0.0100 | -0.0144 |   |
| 0.0026 | 1   | .   |                             |        |        |        |         |         |   |
| 5856   | CG  | CG  | . LYS LYS LYS B B 334 334 . | 0.4449 | 0.4385 | 0.4265 | -0.0039 | -0.0236 | - |
| 0.0241 | 1   | .   |                             |        |        |        |         |         |   |
| 5857   | CD  | CD  | . LYS LYS LYS B B 334 334 . | 0.4544 | 0.5809 | 0.4892 | 0.0098  | 0.0096  | - |
| 0.0134 | 1   | .   |                             |        |        |        |         |         |   |
| 5858   | CE  | CE  | . LYS LYS LYS B B 334 334 . | 0.4863 | 0.6310 | 0.5635 | 0.0000  | -0.0108 | - |
| 0.0440 | 1   | .   |                             |        |        |        |         |         |   |
| 5859   | NZ  | NZ  | . LYS LYS LYS B B 334 334 . | 0.4265 | 0.6526 | 0.6460 | 0.0161  | -0.0228 |   |
| 0.0042 | 1   | .   |                             |        |        |        |         |         |   |
| 5860   | C   | C   | . LYS LYS LYS B B 334 334 . | 0.3783 | 0.3623 | 0.3564 | -0.0085 | -0.0107 | - |
| 0.0019 | 1   | .   |                             |        |        |        |         |         |   |
| 5861   | O   | O   | . LYS LYS LYS B B 334 334 . | 0.3558 | 0.3596 | 0.3578 | -0.0386 | -0.0114 |   |
| 0.0072 | 1   | .   |                             |        |        |        |         |         |   |
| 5862   | N   | N   | . ALA ALA ALA B B 335 335 . | 0.3720 | 0.3528 | 0.3659 | -0.0103 | -0.0104 |   |
| 0.0029 | 1   | .   |                             |        |        |        |         |         |   |

|        |     |     |                             |        |        |        |         |         |   |
|--------|-----|-----|-----------------------------|--------|--------|--------|---------|---------|---|
| 5863   | CA  | CA  | . ALA ALA ALA B B 335 335 . | 0.3677 | 0.3671 | 0.3553 | -0.0004 | -0.0100 | - |
| 0.0087 | 1   | .   |                             |        |        |        |         |         |   |
| 5864   | CB  | CB  | . ALA ALA ALA B B 335 335 . | 0.3722 | 0.3775 | 0.3821 | 0.0085  | -0.0039 | - |
| 0.0098 | 1   | .   |                             |        |        |        |         |         |   |
| 5865   | C   | C   | . ALA ALA ALA B B 335 335 . | 0.3578 | 0.3589 | 0.3471 | -0.0060 | -0.0043 | - |
| 0.0045 | 1   | .   |                             |        |        |        |         |         |   |
| 5866   | O   | O   | . ALA ALA ALA B B 335 335 . | 0.3273 | 0.3618 | 0.3233 | -0.0256 | -0.0009 | - |
| 0.0167 | 1   | .   |                             |        |        |        |         |         |   |
| 5867   | N   | N   | . CYS CYS CYS B B 336 336 . | 0.3485 | 0.3723 | 0.3468 | -0.0068 | -0.0048 | - |
| 0.0037 | 1   | .   |                             |        |        |        |         |         |   |
| 5868   | CA  | CA  | . CYS CYS CYS B B 336 336 . | 0.3581 | 0.3710 | 0.3549 | -0.0030 | -0.0027 | - |
| 0.0132 | 1   | .   |                             |        |        |        |         |         |   |
| 5869   | CB  | CB  | . CYS CYS CYS B B 336 336 . | 0.3463 | 0.3638 | 0.3332 | -0.0119 | 0.0035  | - |
| 0.0218 | 1   | .   |                             |        |        |        |         |         |   |
| 5870   | SG  | SG  | . CYS CYS CYS B B 336 336 . | 0.4020 | 0.4442 | 0.3616 | 0.0399  | -0.0097 | - |
| 0.0368 | 1   | .   |                             |        |        |        |         |         |   |
| 5871   | C   | C   | . CYS CYS CYS B B 336 336 . | 0.3528 | 0.3687 | 0.3618 | 0.0033  | -0.0103 | - |
| 0.0036 | 1   | .   |                             |        |        |        |         |         |   |
| 5872   | O   | O   | . CYS CYS CYS B B 336 336 . | 0.3992 | 0.4124 | 0.3999 | 0.0062  | -0.0192 | - |
| 0.0047 | 1   | .   |                             |        |        |        |         |         |   |
| 5873   | N   | N   | . ASN ASN ASN B B 337 337 . | 0.3276 | 0.3546 | 0.3648 | 0.0007  | -0.0019 | - |
| 0.0021 | 1   | .   |                             |        |        |        |         |         |   |
| 5874   | CA  | CA  | . ASN ASN ASN B B 337 337 . | 0.3312 | 0.3445 | 0.3372 | 0.0012  | -0.0037 | - |
| 0.0011 | 1   | .   |                             |        |        |        |         |         |   |
| 5875   | CB  | CB  | . ASN ASN ASN B B 337 337 . | 0.2943 | 0.3212 | 0.3202 | -0.0001 | -0.0115 | - |
| 0.0018 | 1   | .   |                             |        |        |        |         |         |   |
| 5876   | CG  | CG  | . ASN ASN ASN B B 337 337 . | 0.3216 | 0.3233 | 0.3196 | 0.0080  | 0.0024  | - |
| 0.0035 | 1   | .   |                             |        |        |        |         |         |   |
| 5877   | OD1 | OD1 | . ASN ASN ASN B B 337 337 . | 0.3030 | 0.2971 | 0.2926 | 0.0469  | -0.0680 | - |
| 0.0067 | 1   | .   |                             |        |        |        |         |         |   |
| 5878   | ND2 | ND2 | . ASN ASN ASN B B 337 337 . | 0.2826 | 0.3210 | 0.3346 | -0.0057 | 0.0026  | - |
| 0.0553 | 1   | .   |                             |        |        |        |         |         |   |
| 5879   | C   | C   | . ASN ASN ASN B B 337 337 . | 0.3236 | 0.3326 | 0.3284 | 0.0051  | -0.0075 | - |
| 0.0030 | 1   | .   |                             |        |        |        |         |         |   |
| 5880   | O   | O   | . ASN ASN ASN B B 337 337 . | 0.3199 | 0.3200 | 0.3181 | 0.0264  | -0.0033 | - |
| 0.0032 | 1   | .   |                             |        |        |        |         |         |   |
| 5881   | N   | N   | . CYS CYS CYS B B 338 338 . | 0.3406 | 0.3399 | 0.3377 | 0.0135  | 0.0026  | - |
| 0.0120 | 1   | .   |                             |        |        |        |         |         |   |
| 5882   | CA  | CA  | . CYS CYS CYS B B 338 338 . | 0.3481 | 0.3663 | 0.3374 | 0.0100  | 0.0024  | - |
| 0.0034 | 1   | .   |                             |        |        |        |         |         |   |
| 5883   | CB  | CB  | . CYS CYS CYS B B 338 338 . | 0.3695 | 0.3573 | 0.3335 | 0.0171  | -0.0002 | - |
| 0.0002 | 1   | .   |                             |        |        |        |         |         |   |
| 5884   | SG  | SG  | . CYS CYS CYS B B 338 338 . | 0.3968 | 0.4039 | 0.4008 | 0.0342  | -0.0093 | - |
| 0.0278 | 1   | .   |                             |        |        |        |         |         |   |
| 5885   | C   | C   | . CYS CYS CYS B B 338 338 . | 0.3496 | 0.3543 | 0.3416 | -0.0045 | -0.0036 | - |
| 0.0055 | 1   | .   |                             |        |        |        |         |         |   |
| 5886   | O   | O   | . CYS CYS CYS B B 338 338 . | 0.3683 | 0.3434 | 0.3328 | -0.0236 | -0.0073 | - |
| 0.0051 | 1   | .   |                             |        |        |        |         |         |   |
| 5887   | N   | N   | . LEU LEU LEU B B 339 339 . | 0.3146 | 0.3538 | 0.3261 | 0.0048  | 0.0063  | - |
| 0.0106 | 1   | .   |                             |        |        |        |         |         |   |
| 5888   | CA  | CA  | . LEU LEU LEU B B 339 339 . | 0.3088 | 0.3410 | 0.3378 | -0.0056 | -0.0037 | - |
| 0.0019 | 1   | .   |                             |        |        |        |         |         |   |
| 5889   | CB  | CB  | . LEU LEU LEU B B 339 339 . | 0.2980 | 0.3520 | 0.3362 | 0.0067  | 0.0014  | - |
| 0.0107 | 1   | .   |                             |        |        |        |         |         |   |
| 5890   | CG  | CG  | . LEU LEU LEU B B 339 339 . | 0.2696 | 0.3366 | 0.3242 | -0.0306 | 0.0100  | - |
| 0.0054 | 1   | .   |                             |        |        |        |         |         |   |
| 5891   | CD1 | CD1 | . LEU LEU LEU B B 339 339 . | 0.2623 | 0.3279 | 0.3349 | -0.0391 | -0.0339 | - |
| 0.0123 | 1   | .   |                             |        |        |        |         |         |   |
| 5892   | CD2 | CD2 | . LEU LEU LEU B B 339 339 . | 0.2730 | 0.2901 | 0.2747 | -0.0507 | 0.0441  | - |
| 0.0093 | 1   | .   |                             |        |        |        |         |         |   |

|        |     |     |                             |        |        |        |         |         |   |
|--------|-----|-----|-----------------------------|--------|--------|--------|---------|---------|---|
| 5893   | C   | C   | . LEU LEU LEU B B 339 339 . | 0.3220 | 0.3542 | 0.3386 | -0.0061 | -0.0097 | - |
| 0.0037 | 1   | .   |                             |        |        |        |         |         |   |
| 5894   | O   | O   | . LEU LEU LEU B B 339 339 . | 0.3033 | 0.3508 | 0.3414 | 0.0012  | -0.0260 |   |
| 0.0013 | 1   | .   |                             |        |        |        |         |         |   |
| 5895   | N   | N   | . LEU LEU LEU B B 340 340 . | 0.3397 | 0.3712 | 0.3343 | -0.0156 | -0.0030 | - |
| 0.0013 | 1   | .   |                             |        |        |        |         |         |   |
| 5896   | CA  | CA  | . LEU LEU LEU B B 340 340 . | 0.3444 | 0.3589 | 0.3277 | -0.0078 | 0.0020  |   |
| 0.0062 | 1   | .   |                             |        |        |        |         |         |   |
| 5897   | CB  | CB  | . LEU LEU LEU B B 340 340 . | 0.3106 | 0.3568 | 0.3062 | -0.0196 | -0.0111 |   |
| 0.0094 | 1   | .   |                             |        |        |        |         |         |   |
| 5898   | CG  | CG  | . LEU LEU LEU B B 340 340 . | 0.3660 | 0.3335 | 0.3335 | 0.0137  | -0.0199 | - |
| 0.0251 | 1   | .   |                             |        |        |        |         |         |   |
| 5899   | CD1 | CD1 | . LEU LEU LEU B B 340 340 . | 0.4511 | 0.3211 | 0.2319 | 0.0278  | -0.0151 | - |
| 0.1158 | 1   | .   |                             |        |        |        |         |         |   |
| 5900   | CD2 | CD2 | . LEU LEU LEU B B 340 340 . | 0.3288 | 0.3292 | 0.2849 | 0.0522  | -0.0812 |   |
| 0.0212 | 1   | .   |                             |        |        |        |         |         |   |
| 5901   | C   | C   | . LEU LEU LEU B B 340 340 . | 0.3328 | 0.3491 | 0.3272 | -0.0031 | 0.0126  |   |
| 0.0017 | 1   | .   |                             |        |        |        |         |         |   |
| 5902   | O   | O   | . LEU LEU LEU B B 340 340 . | 0.3370 | 0.3551 | 0.3347 | 0.0093  | 0.0317  | - |
| 0.0025 | 1   | .   |                             |        |        |        |         |         |   |
| 5903   | N   | N   | . LEU LEU LEU B B 341 341 . | 0.3441 | 0.3505 | 0.3175 | -0.0055 | 0.0152  |   |
| 0.0032 | 1   | .   |                             |        |        |        |         |         |   |
| 5904   | CA  | CA  | . LEU LEU LEU B B 341 341 . | 0.3265 | 0.3415 | 0.3309 | 0.0033  | 0.0118  | - |
| 0.0034 | 1   | .   |                             |        |        |        |         |         |   |
| 5905   | CB  | CB  | . LEU LEU LEU B B 341 341 . | 0.3448 | 0.3508 | 0.3313 | -0.0199 | 0.0069  | - |
| 0.0004 | 1   | .   |                             |        |        |        |         |         |   |
| 5906   | CG  | CG  | . LEU LEU LEU B B 341 341 . | 0.3498 | 0.3451 | 0.3951 | 0.0238  | 0.0201  |   |
| 0.0263 | 1   | .   |                             |        |        |        |         |         |   |
| 5907   | CD1 | CD1 | . LEU LEU LEU B B 341 341 . | 0.5002 | 0.4627 | 0.4084 | 0.0268  | -0.0365 |   |
| 0.0852 | 1   | .   |                             |        |        |        |         |         |   |
| 5908   | CD2 | CD2 | . LEU LEU LEU B B 341 341 . | 0.3686 | 0.3657 | 0.3559 | -0.0275 | 0.0142  |   |
| 0.0172 | 1   | .   |                             |        |        |        |         |         |   |
| 5909   | C   | C   | . LEU LEU LEU B B 341 341 . | 0.3343 | 0.3302 | 0.3193 | 0.0018  | 0.0156  | - |
| 0.0026 | 1   | .   |                             |        |        |        |         |         |   |
| 5910   | O   | O   | . LEU LEU LEU B B 341 341 . | 0.3438 | 0.3211 | 0.3186 | 0.0046  | 0.0165  | - |
| 0.0097 | 1   | .   |                             |        |        |        |         |         |   |
| 5911   | N   | N   | . LYS LYS LYS B B 342 342 . | 0.3356 | 0.3261 | 0.3136 | 0.0035  | 0.0114  |   |
| 0.0040 | 1   | .   |                             |        |        |        |         |         |   |
| 5912   | CA  | CA  | . LYS LYS LYS B B 342 342 . | 0.3293 | 0.3235 | 0.2925 | 0.0072  | 0.0133  |   |
| 0.0053 | 1   | .   |                             |        |        |        |         |         |   |
| 5913   | CB  | CB  | . LYS LYS LYS B B 342 342 . | 0.3063 | 0.2995 | 0.2431 | -0.0003 | 0.0207  |   |
| 0.0073 | 1   | .   |                             |        |        |        |         |         |   |
| 5914   | CG  | CG  | . LYS LYS LYS B B 342 342 . | 0.3166 | 0.2813 | 0.2612 | 0.0135  | -0.0019 |   |
| 0.0270 | 1   | .   |                             |        |        |        |         |         |   |
| 5915   | CD  | CD  | . LYS LYS LYS B B 342 342 . | 0.2530 | 0.3351 | 0.1910 | 0.0045  | 0.0005  |   |
| 0.0074 | 1   | .   |                             |        |        |        |         |         |   |
| 5916   | CE  | CE  | . LYS LYS LYS B B 342 342 . | 0.3208 | 0.3340 | 0.2409 | -0.0017 | 0.0498  |   |
| 0.0333 | 1   | .   |                             |        |        |        |         |         |   |
| 5917   | NZ  | NZ  | . LYS LYS LYS B B 342 342 . | 0.3272 | 0.3472 | 0.3055 | -0.0483 | 0.0769  | - |
| 0.0724 | 1   | .   |                             |        |        |        |         |         |   |
| 5918   | C   | C   | . LYS LYS LYS B B 342 342 . | 0.3473 | 0.3321 | 0.3081 | 0.0084  | 0.0127  |   |
| 0.0006 | 1   | .   |                             |        |        |        |         |         |   |
| 5919   | O   | O   | . LYS LYS LYS B B 342 342 . | 0.3692 | 0.3426 | 0.2921 | 0.0239  | 0.0073  |   |
| 0.0180 | 1   | .   |                             |        |        |        |         |         |   |
| 5920   | N   | N   | . VAL VAL VAL B B 343 343 . | 0.3492 | 0.3522 | 0.3311 | 0.0013  | 0.0087  | - |
| 0.0076 | 1   | .   |                             |        |        |        |         |         |   |
| 5921   | CA  | CA  | . VAL VAL VAL B B 343 343 . | 0.3420 | 0.3596 | 0.3490 | -0.0098 | -0.0010 | - |
| 0.0105 | 1   | .   |                             |        |        |        |         |         |   |
| 5922   | CB  | CB  | . VAL VAL VAL B B 343 343 . | 0.3601 | 0.3674 | 0.3631 | -0.0057 | -0.0099 | - |
| 0.0116 | 1   | .   |                             |        |        |        |         |         |   |



|        |     |     |                             |        |        |        |         |         |   |
|--------|-----|-----|-----------------------------|--------|--------|--------|---------|---------|---|
| 5953   | CA  | CA  | . GLY GLY GLY B B 347 347 . | 0.3446 | 0.3795 | 0.3776 | 0.0047  | 0.0020  | - |
| 0.0038 | 1   | .   |                             |        |        |        |         |         |   |
| 5954   | C   | C   | . GLY GLY GLY B B 347 347 . | 0.3416 | 0.3885 | 0.3789 | 0.0109  | 0.0002  |   |
| 0.0065 | 1   | .   |                             |        |        |        |         |         |   |
| 5955   | O   | O   | . GLY GLY GLY B B 347 347 . | 0.3262 | 0.4006 | 0.3807 | 0.0289  | -0.0122 | - |
| 0.0076 | 1   | .   |                             |        |        |        |         |         |   |
| 5956   | N   | N   | . SER SER SER B B 348 348 . | 0.3212 | 0.3839 | 0.3784 | 0.0045  | -0.0043 |   |
| 0.0107 | 1   | .   |                             |        |        |        |         |         |   |
| 5957   | CA  | CA  | . SER SER SER B B 348 348 . | 0.3252 | 0.3976 | 0.3790 | 0.0075  | -0.0159 |   |
| 0.0108 | 1   | .   |                             |        |        |        |         |         |   |
| 5958   | CB  | CB  | . SER SER SER B B 348 348 . | 0.3132 | 0.4025 | 0.3791 | 0.0097  | -0.0246 |   |
| 0.0153 | 1   | .   |                             |        |        |        |         |         |   |
| 5959   | OG  | OG  | . SER SER SER B B 348 348 . | 0.3009 | 0.3695 | 0.3976 | -0.0106 | -0.0473 | - |
| 0.0035 | 1   | .   |                             |        |        |        |         |         |   |
| 5960   | C   | C   | . SER SER SER B B 348 348 . | 0.3077 | 0.3963 | 0.3677 | 0.0129  | -0.0168 |   |
| 0.0111 | 1   | .   |                             |        |        |        |         |         |   |
| 5961   | O   | O   | . SER SER SER B B 348 348 . | 0.3061 | 0.4259 | 0.3752 | 0.0010  | -0.0087 |   |
| 0.0219 | 1   | .   |                             |        |        |        |         |         |   |
| 5962   | N   | N   | . VAL VAL VAL B B 349 349 . | 0.3143 | 0.4041 | 0.3726 | 0.0217  | -0.0291 |   |
| 0.0134 | 1   | .   |                             |        |        |        |         |         |   |
| 5963   | CA  | CA  | . VAL VAL VAL B B 349 349 . | 0.3289 | 0.4126 | 0.3915 | 0.0230  | -0.0173 |   |
| 0.0027 | 1   | .   |                             |        |        |        |         |         |   |
| 5964   | CB  | CB  | . VAL VAL VAL B B 349 349 . | 0.3689 | 0.4157 | 0.3851 | 0.0233  | -0.0248 |   |
| 0.0051 | 1   | .   |                             |        |        |        |         |         |   |
| 5965   | CG1 | CG1 | . VAL VAL VAL B B 349 349 . | 0.3584 | 0.4089 | 0.3687 | 0.0286  | -0.0151 | - |
| 0.0044 | 1   | .   |                             |        |        |        |         |         |   |
| 5966   | CG2 | CG2 | . VAL VAL VAL B B 349 349 . | 0.3139 | 0.4099 | 0.3741 | 0.0441  | -0.0363 |   |
| 0.0002 | 1   | .   |                             |        |        |        |         |         |   |
| 5967   | C   | C   | . VAL VAL VAL B B 349 349 . | 0.3673 | 0.4379 | 0.4061 | 0.0186  | 0.0005  |   |
| 0.0017 | 1   | .   |                             |        |        |        |         |         |   |
| 5968   | O   | O   | . VAL VAL VAL B B 349 349 . | 0.3136 | 0.4515 | 0.4404 | 0.0215  | 0.0220  | - |
| 0.0122 | 1   | .   |                             |        |        |        |         |         |   |
| 5969   | N   | N   | . THR THR THR B B 350 350 . | 0.3584 | 0.4337 | 0.4236 | 0.0274  | 0.0001  |   |
| 0.0097 | 1   | .   |                             |        |        |        |         |         |   |
| 5970   | CA  | CA  | . THR THR THR B B 350 350 . | 0.3810 | 0.4382 | 0.4259 | 0.0080  | -0.0004 |   |
| 0.0051 | 1   | .   |                             |        |        |        |         |         |   |
| 5971   | CB  | CB  | . THR THR THR B B 350 350 . | 0.3835 | 0.4451 | 0.4239 | 0.0031  | -0.0007 |   |
| 0.0101 | 1   | .   |                             |        |        |        |         |         |   |
| 5972   | OG1 | OG1 | . THR THR THR B B 350 350 . | 0.4147 | 0.4447 | 0.4697 | -0.0352 | 0.0197  |   |
| 0.0005 | 1   | .   |                             |        |        |        |         |         |   |
| 5973   | CG2 | CG2 | . THR THR THR B B 350 350 . | 0.4024 | 0.4541 | 0.4434 | -0.0064 | -0.0198 |   |
| 0.0025 | 1   | .   |                             |        |        |        |         |         |   |
| 5974   | C   | C   | . THR THR THR B B 350 350 . | 0.3813 | 0.4479 | 0.4336 | 0.0178  | 0.0013  |   |
| 0.0024 | 1   | .   |                             |        |        |        |         |         |   |
| 5975   | O   | O   | . THR THR THR B B 350 350 . | 0.3715 | 0.4629 | 0.4523 | 0.0321  | 0.0033  |   |
| 0.0140 | 1   | .   |                             |        |        |        |         |         |   |
| 5976   | N   | N   | . GLU GLU GLU B B 351 351 . | 0.3787 | 0.4368 | 0.4430 | 0.0162  | 0.0047  |   |
| 0.0049 | 1   | .   |                             |        |        |        |         |         |   |
| 5977   | CA  | CA  | . GLU GLU GLU B B 351 351 . | 0.4098 | 0.4552 | 0.4519 | 0.0172  | -0.0003 |   |
| 0.0020 | 1   | .   |                             |        |        |        |         |         |   |
| 5978   | CB  | CB  | . GLU GLU GLU B B 351 351 . | 0.4146 | 0.4484 | 0.4628 | 0.0117  | -0.0025 | - |
| 0.0035 | 1   | .   |                             |        |        |        |         |         |   |
| 5979   | CG  | CG  | . GLU GLU GLU B B 351 351 . | 0.4335 | 0.4751 | 0.4908 | 0.0335  | -0.0110 |   |
| 0.0099 | 1   | .   |                             |        |        |        |         |         |   |
| 5980   | CD  | CD  | . GLU GLU GLU B B 351 351 . | 0.4477 | 0.4891 | 0.5203 | 0.0319  | -0.0196 |   |
| 0.0172 | 1   | .   |                             |        |        |        |         |         |   |
| 5981   | OE1 | OE1 | . GLU GLU GLU B B 351 351 . | 0.4539 | 0.5133 | 0.5282 | 0.0598  | 0.0186  |   |
| 0.0320 | 1   | .   |                             |        |        |        |         |         |   |
| 5982   | OE2 | OE2 | . GLU GLU GLU B B 351 351 . | 0.4200 | 0.5187 | 0.5367 | 0.0268  | -0.0530 |   |
| 0.0952 | 1   | .   |                             |        |        |        |         |         |   |

|        |     |     |                   |         |                                          |
|--------|-----|-----|-------------------|---------|------------------------------------------|
| 5983   | C   | C   | . GLU GLU GLU B B | 351 351 | . 0.4113 0.4578 0.4428 0.0127 0.0073     |
| 0.0035 | 1   | .   |                   |         |                                          |
| 5984   | O   | O   | . GLU GLU GLU B B | 351 351 | . 0.4170 0.4870 0.4601 0.0095 0.0038     |
| 0.0098 | 1   | .   |                   |         |                                          |
| 5985   | N   | N   | . ALA ALA ALA B B | 352 352 | . 0.4049 0.4465 0.4273 0.0150 0.0073     |
| 0.0163 | 1   | .   |                   |         |                                          |
| 5986   | CA  | CA  | . ALA ALA ALA B B | 352 352 | . 0.4218 0.4437 0.4267 0.0039 0.0072     |
| 0.0135 | 1   | .   |                   |         |                                          |
| 5987   | CB  | CB  | . ALA ALA ALA B B | 352 352 | . 0.4069 0.4327 0.4236 0.0255 0.0004     |
| 0.0135 | 1   | .   |                   |         |                                          |
| 5988   | C   | C   | . ALA ALA ALA B B | 352 352 | . 0.4154 0.4421 0.4375 -0.0059 0.0052    |
| 0.0140 | 1   | .   |                   |         |                                          |
| 5989   | O   | O   | . ALA ALA ALA B B | 352 352 | . 0.4057 0.4456 0.4397 -0.0056 0.0094    |
| 0.0179 | 1   | .   |                   |         |                                          |
| 5990   | N   | N   | . ILE ILE ILE B B | 353 353 | . 0.4267 0.4474 0.4347 -0.0116 -0.0010   |
| 0.0207 | 1   | .   |                   |         |                                          |
| 5991   | CA  | CA  | . ILE ILE ILE B B | 353 353 | . 0.4132 0.4323 0.4269 -0.0197 -0.0001   |
| 0.0126 | 1   | .   |                   |         |                                          |
| 5992   | CB  | CB  | . ILE ILE ILE B B | 353 353 | . 0.4299 0.4323 0.4273 -0.0179 0.0000    |
| 0.0156 | 1   | .   |                   |         |                                          |
| 5993   | CG1 | CG1 | . ILE ILE ILE B B | 353 353 | . 0.4454 0.4333 0.3977 -0.0112 0.0151    |
| 0.0116 | 1   | .   |                   |         |                                          |
| 5994   | CD1 | CD1 | . ILE ILE ILE B B | 353 353 | . 0.4577 0.4208 0.3349 -0.0202 0.0105    |
| 0.0137 | 1   | .   |                   |         |                                          |
| 5995   | CG2 | CG2 | . ILE ILE ILE B B | 353 353 | . 0.3772 0.4413 0.4169 -0.0232 0.0103    |
| 0.0092 | 1   | .   |                   |         |                                          |
| 5996   | C   | C   | . ILE ILE ILE B B | 353 353 | . 0.4071 0.4303 0.4316 -0.0224 -0.0038   |
| 0.0091 | 1   | .   |                   |         |                                          |
| 5997   | O   | O   | . ILE ILE ILE B B | 353 353 | . 0.3889 0.4250 0.4303 -0.0463 -0.0169 - |
| 0.0073 | 1   | .   |                   |         |                                          |
| 5998   | N   | N   | . GLN GLN GLN B B | 354 354 | . 0.4037 0.4331 0.4425 -0.0119 -0.0075   |
| 0.0167 | 1   | .   |                   |         |                                          |
| 5999   | CA  | CA  | . GLN GLN GLN B B | 354 354 | . 0.4292 0.4393 0.4338 -0.0005 -0.0007   |
| 0.0184 | 1   | .   |                   |         |                                          |
| 6000   | CB  | CB  | . GLN GLN GLN B B | 354 354 | . 0.4474 0.4532 0.4538 0.0186 -0.0133    |
| 0.0210 | 1   | .   |                   |         |                                          |
| 6001   | CG  | CG  | . GLN GLN GLN B B | 354 354 | . 0.5261 0.5286 0.5539 0.0175 -0.0004 -  |
| 0.0024 | 1   | .   |                   |         |                                          |
| 6002   | CD  | CD  | . GLN GLN GLN B B | 354 354 | . 0.5776 0.6704 0.6223 0.1032 -0.0279 -  |
| 0.0431 | 1   | .   |                   |         |                                          |
| 6003   | OE1 | OE1 | . GLN GLN GLN B B | 354 354 | . 0.5490 0.7275 0.6058 0.1362 -0.0501 -  |
| 0.0840 | 1   | .   |                   |         |                                          |
| 6004   | NE2 | NE2 | . GLN GLN GLN B B | 354 354 | . 0.6298 0.7361 0.6146 0.1051 -0.0549 -  |
| 0.0566 | 1   | .   |                   |         |                                          |
| 6005   | C   | C   | . GLN GLN GLN B B | 354 354 | . 0.4214 0.4215 0.4146 0.0067 -0.0072    |
| 0.0184 | 1   | .   |                   |         |                                          |
| 6006   | O   | O   | . GLN GLN GLN B B | 354 354 | . 0.4325 0.4405 0.4125 0.0135 -0.0068    |
| 0.0108 | 1   | .   |                   |         |                                          |
| 6007   | N   | N   | . ALA ALA ALA B B | 355 355 | . 0.3888 0.3830 0.3748 0.0050 -0.0107    |
| 0.0249 | 1   | .   |                   |         |                                          |
| 6008   | CA  | CA  | . ALA ALA ALA B B | 355 355 | . 0.3724 0.3731 0.3773 0.0008 -0.0221    |
| 0.0196 | 1   | .   |                   |         |                                          |
| 6009   | CB  | CB  | . ALA ALA ALA B B | 355 355 | . 0.4058 0.3593 0.3649 0.0050 -0.0185    |
| 0.0277 | 1   | .   |                   |         |                                          |
| 6010   | C   | C   | . ALA ALA ALA B B | 355 355 | . 0.3541 0.3917 0.3770 -0.0029 -0.0209   |
| 0.0185 | 1   | .   |                   |         |                                          |
| 6011   | O   | O   | . ALA ALA ALA B B | 355 355 | . 0.3116 0.3951 0.3760 0.0000 -0.0308    |
| 0.0411 | 1   | .   |                   |         |                                          |
| 6012   | N   | N   | . CYS CYS CYS B B | 356 356 | . 0.3530 0.4014 0.3827 0.0014 -0.0278    |
| 0.0151 | 1   | .   |                   |         |                                          |

|        |     |     |                             |        |        |        |         |         |   |
|--------|-----|-----|-----------------------------|--------|--------|--------|---------|---------|---|
| 6013   | CA  | CA  | . CYS CYS CYS B B 356 356 . | 0.3780 | 0.4112 | 0.3936 | 0.0045  | -0.0166 |   |
| 0.0053 | 1   | .   |                             |        |        |        |         |         |   |
| 6014   | CB  | CB  | . CYS CYS CYS B B 356 356 . | 0.3839 | 0.4172 | 0.4046 | -0.0005 | -0.0208 |   |
| 0.0014 | 1   | .   |                             |        |        |        |         |         |   |
| 6015   | SG  | SG  | . CYS CYS CYS B B 356 356 . | 0.4732 | 0.4543 | 0.4086 | 0.0400  | -0.0316 |   |
| 0.0218 | 1   | .   |                             |        |        |        |         |         |   |
| 6016   | C   | C   | . CYS CYS CYS B B 356 356 . | 0.3882 | 0.4260 | 0.4131 | 0.0011  | -0.0108 |   |
| 0.0004 | 1   | .   |                             |        |        |        |         |         |   |
| 6017   | O   | O   | . CYS CYS CYS B B 356 356 . | 0.3545 | 0.4090 | 0.3933 | 0.0067  | -0.0110 | - |
| 0.0018 | 1   | .   |                             |        |        |        |         |         |   |
| 6018   | N   | N   | . LYS LYS LYS B B 357 357 . | 0.4038 | 0.4502 | 0.4353 | -0.0069 | -0.0084 | - |
| 0.0006 | 1   | .   |                             |        |        |        |         |         |   |
| 6019   | CA  | CA  | . LYS LYS LYS B B 357 357 . | 0.4263 | 0.4674 | 0.4557 | -0.0060 | -0.0136 | - |
| 0.0038 | 1   | .   |                             |        |        |        |         |         |   |
| 6020   | CB  | CB  | . LYS LYS LYS B B 357 357 . | 0.4511 | 0.4856 | 0.4748 | -0.0093 | -0.0116 | - |
| 0.0036 | 1   | .   |                             |        |        |        |         |         |   |
| 6021   | CG  | CG  | . LYS LYS LYS B B 357 357 . | 0.4609 | 0.5273 | 0.5203 | -0.0086 | -0.0185 |   |
| 0.0147 | 1   | .   |                             |        |        |        |         |         |   |
| 6022   | CD  | CD  | . LYS LYS LYS B B 357 357 . | 0.5241 | 0.6351 | 0.5811 | -0.0272 | 0.0165  |   |
| 0.0330 | 1   | .   |                             |        |        |        |         |         |   |
| 6023   | CE  | CE  | . LYS LYS LYS B B 357 357 . | 0.5287 | 0.6822 | 0.6775 | -0.0054 | 0.0082  |   |
| 0.0349 | 1   | .   |                             |        |        |        |         |         |   |
| 6024   | NZ  | NZ  | . LYS LYS LYS B B 357 357 . | 0.5790 | 0.7389 | 0.7311 | -0.0018 | 0.0268  |   |
| 0.0144 | 1   | .   |                             |        |        |        |         |         |   |
| 6025   | C   | C   | . LYS LYS LYS B B 357 357 . | 0.4434 | 0.4807 | 0.4683 | -0.0026 | -0.0167 | - |
| 0.0083 | 1   | .   |                             |        |        |        |         |         |   |
| 6026   | O   | O   | . LYS LYS LYS B B 357 357 . | 0.4509 | 0.5149 | 0.4830 | 0.0001  | -0.0260 | - |
| 0.0166 | 1   | .   |                             |        |        |        |         |         |   |
| 6027   | N   | N   | . LEU LEU LEU B B 358 358 . | 0.4382 | 0.4722 | 0.4661 | 0.0012  | -0.0261 | - |
| 0.0031 | 1   | .   |                             |        |        |        |         |         |   |
| 6028   | CA  | CA  | . LEU LEU LEU B B 358 358 . | 0.4393 | 0.4667 | 0.4590 | -0.0049 | -0.0217 |   |
| 0.0058 | 1   | .   |                             |        |        |        |         |         |   |
| 6029   | CB  | CB  | . LEU LEU LEU B B 358 358 . | 0.4612 | 0.4754 | 0.4608 | -0.0077 | -0.0359 |   |
| 0.0108 | 1   | .   |                             |        |        |        |         |         |   |
| 6030   | CG  | CG  | . LEU LEU LEU B B 358 358 . | 0.4952 | 0.4762 | 0.4776 | -0.0232 | -0.0440 |   |
| 0.0157 | 1   | .   |                             |        |        |        |         |         |   |
| 6031   | CD1 | CD1 | . LEU LEU LEU B B 358 358 . | 0.5686 | 0.4740 | 0.4585 | -0.0156 | -0.0965 |   |
| 0.0106 | 1   | .   |                             |        |        |        |         |         |   |
| 6032   | CD2 | CD2 | . LEU LEU LEU B B 358 358 . | 0.5559 | 0.4866 | 0.3848 | -0.0567 | -0.0854 |   |
| 0.0240 | 1   | .   |                             |        |        |        |         |         |   |
| 6033   | C   | C   | . LEU LEU LEU B B 358 358 . | 0.4427 | 0.4694 | 0.4481 | -0.0010 | -0.0195 |   |
| 0.0065 | 1   | .   |                             |        |        |        |         |         |   |
| 6034   | O   | O   | . LEU LEU LEU B B 358 358 . | 0.4412 | 0.4778 | 0.4665 | -0.0082 | -0.0293 |   |
| 0.0205 | 1   | .   |                             |        |        |        |         |         |   |
| 6035   | N   | N   | . ALA ALA ALA B B 359 359 . | 0.4345 | 0.4534 | 0.4224 | -0.0035 | -0.0129 |   |
| 0.0018 | 1   | .   |                             |        |        |        |         |         |   |
| 6036   | CA  | CA  | . ALA ALA ALA B B 359 359 . | 0.4262 | 0.4411 | 0.4259 | -0.0060 | -0.0217 | - |
| 0.0012 | 1   | .   |                             |        |        |        |         |         |   |
| 6037   | CB  | CB  | . ALA ALA ALA B B 359 359 . | 0.4154 | 0.4130 | 0.4054 | -0.0100 | -0.0295 | - |
| 0.0021 | 1   | .   |                             |        |        |        |         |         |   |
| 6038   | C   | C   | . ALA ALA ALA B B 359 359 . | 0.4272 | 0.4393 | 0.4188 | -0.0050 | -0.0208 | - |
| 0.0028 | 1   | .   |                             |        |        |        |         |         |   |
| 6039   | O   | O   | . ALA ALA ALA B B 359 359 . | 0.4040 | 0.4459 | 0.4293 | -0.0147 | -0.0364 | - |
| 0.0045 | 1   | .   |                             |        |        |        |         |         |   |
| 6040   | N   | N   | . GLN GLN GLN B B 360 360 . | 0.4385 | 0.4516 | 0.4251 | -0.0216 | -0.0220 | - |
| 0.0044 | 1   | .   |                             |        |        |        |         |         |   |
| 6041   | CA  | CA  | . GLN GLN GLN B B 360 360 . | 0.4717 | 0.4714 | 0.4482 | -0.0137 | -0.0186 |   |
| 0.0043 | 1   | .   |                             |        |        |        |         |         |   |
| 6042   | CB  | CB  | . GLN GLN GLN B B 360 360 . | 0.4657 | 0.4677 | 0.4440 | -0.0088 | -0.0212 |   |
| 0.0091 | 1   | .   |                             |        |        |        |         |         |   |





|        |     |     |                             |        |        |        |         |         |   |
|--------|-----|-----|-----------------------------|--------|--------|--------|---------|---------|---|
| 6073   | CG  | CG  | . TRP TRP TRP B B 364 364 . | 0.5055 | 0.4824 | 0.4736 | -0.0037 | -0.0262 |   |
| 0.0169 | 1   | .   |                             |        |        |        |         |         |   |
| 6074   | CD1 | CD1 | . TRP TRP TRP B B 364 364 . | 0.5332 | 0.5132 | 0.4902 | -0.0021 | -0.0224 |   |
| 0.0107 | 1   | .   |                             |        |        |        |         |         |   |
| 6075   | NE1 | NE1 | . TRP TRP TRP B B 364 364 . | 0.5846 | 0.5447 | 0.5036 | 0.0050  | -0.0268 |   |
| 0.0418 | 1   | .   |                             |        |        |        |         |         |   |
| 6076   | CE2 | CE2 | . TRP TRP TRP B B 364 364 . | 0.5509 | 0.5159 | 0.5245 | -0.0041 | -0.0207 |   |
| 0.0126 | 1   | .   |                             |        |        |        |         |         |   |
| 6077   | CD2 | CD2 | . TRP TRP TRP B B 364 364 . | 0.5409 | 0.5034 | 0.4799 | -0.0042 | -0.0193 |   |
| 0.0119 | 1   | .   |                             |        |        |        |         |         |   |
| 6078   | CE3 | CE3 | . TRP TRP TRP B B 364 364 . | 0.5551 | 0.4965 | 0.4689 | 0.0025  | -0.0171 |   |
| 0.0317 | 1   | .   |                             |        |        |        |         |         |   |
| 6079   | CZ3 | CZ3 | . TRP TRP TRP B B 364 364 . | 0.5438 | 0.5057 | 0.4758 | 0.0257  | -0.0179 |   |
| 0.0315 | 1   | .   |                             |        |        |        |         |         |   |
| 6080   | CH2 | CH2 | . TRP TRP TRP B B 364 364 . | 0.5284 | 0.5159 | 0.5264 | 0.0006  | 0.0300  |   |
| 0.0238 | 1   | .   |                             |        |        |        |         |         |   |
| 6081   | CZ2 | CZ2 | . TRP TRP TRP B B 364 364 . | 0.5114 | 0.5100 | 0.5248 | 0.0109  | -0.0187 |   |
| 0.0375 | 1   | .   |                             |        |        |        |         |         |   |
| 6082   | C   | C   | . TRP TRP TRP B B 364 364 . | 0.4275 | 0.4282 | 0.4111 | -0.0029 | -0.0207 | - |
| 0.0092 | 1   | .   |                             |        |        |        |         |         |   |
| 6083   | O   | O   | . TRP TRP TRP B B 364 364 . | 0.4051 | 0.4125 | 0.3884 | -0.0285 | -0.0241 | - |
| 0.0140 | 1   | .   |                             |        |        |        |         |         |   |
| 6084   | N   | N   | . GLY GLY GLY B B 365 365 . | 0.4096 | 0.4221 | 0.4009 | 0.0020  | -0.0180 | - |
| 0.0095 | 1   | .   |                             |        |        |        |         |         |   |
| 6085   | CA  | CA  | . GLY GLY GLY B B 365 365 . | 0.3850 | 0.3920 | 0.3886 | -0.0043 | -0.0144 | - |
| 0.0100 | 1   | .   |                             |        |        |        |         |         |   |
| 6086   | C   | C   | . GLY GLY GLY B B 365 365 . | 0.3851 | 0.3890 | 0.3845 | -0.0078 | -0.0169 |   |
| 0.0004 | 1   | .   |                             |        |        |        |         |         |   |
| 6087   | O   | O   | . GLY GLY GLY B B 365 365 . | 0.3910 | 0.3890 | 0.3848 | 0.0105  | -0.0337 | - |
| 0.0042 | 1   | .   |                             |        |        |        |         |         |   |
| 6088   | N   | N   | . VAL VAL VAL B B 366 366 . | 0.3798 | 0.3781 | 0.3709 | -0.0096 | -0.0211 |   |
| 0.0015 | 1   | .   |                             |        |        |        |         |         |   |
| 6089   | CA  | CA  | . VAL VAL VAL B B 366 366 . | 0.3538 | 0.3479 | 0.3594 | -0.0053 | -0.0085 |   |
| 0.0017 | 1   | .   |                             |        |        |        |         |         |   |
| 6090   | CB  | CB  | . VAL VAL VAL B B 366 366 . | 0.3562 | 0.3571 | 0.3510 | -0.0047 | -0.0148 |   |
| 0.0051 | 1   | .   |                             |        |        |        |         |         |   |
| 6091   | CG1 | CG1 | . VAL VAL VAL B B 366 366 . | 0.2911 | 0.2844 | 0.3100 | 0.0065  | 0.0134  |   |
| 0.0057 | 1   | .   |                             |        |        |        |         |         |   |
| 6092   | CG2 | CG2 | . VAL VAL VAL B B 366 366 . | 0.4123 | 0.3150 | 0.3936 | -0.0072 | -0.0325 |   |
| 0.0085 | 1   | .   |                             |        |        |        |         |         |   |
| 6093   | C   | C   | . VAL VAL VAL B B 366 366 . | 0.3411 | 0.3543 | 0.3449 | -0.0082 | -0.0096 |   |
| 0.0021 | 1   | .   |                             |        |        |        |         |         |   |
| 6094   | O   | O   | . VAL VAL VAL B B 366 366 . | 0.3445 | 0.3919 | 0.3664 | 0.0068  | -0.0303 | - |
| 0.0036 | 1   | .   |                             |        |        |        |         |         |   |
| 6095   | N   | N   | . MET MET MET B B 367 367 . | 0.3226 | 0.3352 | 0.3439 | -0.0102 | -0.0037 |   |
| 0.0056 | 1   | .   |                             |        |        |        |         |         |   |
| 6096   | CA  | CA  | . MET MET MET B B 367 367 . | 0.3072 | 0.3246 | 0.3311 | -0.0080 | -0.0083 |   |
| 0.0037 | 1   | .   |                             |        |        |        |         |         |   |
| 6097   | CB  | CB  | . MET MET MET B B 367 367 . | 0.2887 | 0.3075 | 0.3054 | -0.0188 | -0.0002 | - |
| 0.0013 | 1   | .   |                             |        |        |        |         |         |   |
| 6098   | CG  | CG  | . MET MET MET B B 367 367 . | 0.3046 | 0.2917 | 0.3385 | -0.0004 | -0.0305 |   |
| 0.0180 | 1   | .   |                             |        |        |        |         |         |   |
| 6099   | SD  | SD  | . MET MET MET B B 367 367 . | 0.3754 | 0.3346 | 0.3576 | 0.0431  | -0.0114 |   |
| 0.0018 | 1   | .   |                             |        |        |        |         |         |   |
| 6100   | CE  | CE  | . MET MET MET B B 367 367 . | 0.3272 | 0.3777 | 0.3004 | 0.0544  | -0.0658 | - |
| 0.0431 | 1   | .   |                             |        |        |        |         |         |   |
| 6101   | C   | C   | . MET MET MET B B 367 367 . | 0.2869 | 0.3302 | 0.3321 | -0.0029 | 0.0020  |   |
| 0.0087 | 1   | .   |                             |        |        |        |         |         |   |
| 6102   | O   | O   | . MET MET MET B B 367 367 . | 0.2384 | 0.3359 | 0.3367 | -0.0073 | -0.0045 |   |
| 0.0149 | 1   | .   |                             |        |        |        |         |         |   |

|        |     |     |                             |        |        |        |         |           |
|--------|-----|-----|-----------------------------|--------|--------|--------|---------|-----------|
| 6103   | N   | N   | . VAL VAL VAL B B 368 368 . | 0.3003 | 0.3341 | 0.3291 | 0.0064  | -0.0028   |
| 0.0160 | 1   | .   |                             |        |        |        |         |           |
| 6104   | CA  | CA  | . VAL VAL VAL B B 368 368 . | 0.3276 | 0.3329 | 0.3179 | 0.0118  | -0.0011   |
| 0.0133 | 1   | .   |                             |        |        |        |         |           |
| 6105   | CB  | CB  | . VAL VAL VAL B B 368 368 . | 0.3290 | 0.3511 | 0.3211 | 0.0109  | 0.0023    |
| 0.0098 | 1   | .   |                             |        |        |        |         |           |
| 6106   | CG1 | CG1 | . VAL VAL VAL B B 368 368 . | 0.3322 | 0.3121 | 0.2807 | 0.0360  | -0.0143 - |
| 0.0072 | 1   | .   |                             |        |        |        |         |           |
| 6107   | CG2 | CG2 | . VAL VAL VAL B B 368 368 . | 0.3069 | 0.3144 | 0.2533 | 0.0415  | -0.0264   |
| 0.0288 | 1   | .   |                             |        |        |        |         |           |
| 6108   | C   | C   | . VAL VAL VAL B B 368 368 . | 0.3394 | 0.3453 | 0.3185 | 0.0116  | -0.0048   |
| 0.0098 | 1   | .   |                             |        |        |        |         |           |
| 6109   | O   | O   | . VAL VAL VAL B B 368 368 . | 0.3764 | 0.3683 | 0.3227 | 0.0198  | -0.0127   |
| 0.0244 | 1   | .   |                             |        |        |        |         |           |
| 6110   | N   | N   | . SER SER SER B B 369 369 . | 0.3533 | 0.3560 | 0.3311 | 0.0058  | -0.0045   |
| 0.0199 | 1   | .   |                             |        |        |        |         |           |
| 6111   | CA  | CA  | . SER SER SER B B 369 369 . | 0.3265 | 0.3434 | 0.3273 | -0.0001 | -0.0111   |
| 0.0177 | 1   | .   |                             |        |        |        |         |           |
| 6112   | CB  | CB  | . SER SER SER B B 369 369 . | 0.3320 | 0.3441 | 0.3161 | -0.0084 | -0.0079   |
| 0.0216 | 1   | .   |                             |        |        |        |         |           |
| 6113   | OG  | OG  | . SER SER SER B B 369 369 . | 0.2940 | 0.3213 | 0.3173 | 0.0000  | -0.0405   |
| 0.0377 | 1   | .   |                             |        |        |        |         |           |
| 6114   | C   | C   | . SER SER SER B B 369 369 . | 0.3204 | 0.3427 | 0.3197 | 0.0062  | -0.0058   |
| 0.0171 | 1   | .   |                             |        |        |        |         |           |
| 6115   | O   | O   | . SER SER SER B B 369 369 . | 0.3556 | 0.3572 | 0.3374 | 0.0120  | -0.0070   |
| 0.0351 | 1   | .   |                             |        |        |        |         |           |
| 6116   | N   | N   | . HIS HIS HIS B B 370 370 . | 0.3053 | 0.3272 | 0.3101 | 0.0163  | -0.0014   |
| 0.0112 | 1   | .   |                             |        |        |        |         |           |
| 6117   | CA  | CA  | . HIS HIS HIS B B 370 370 . | 0.2582 | 0.2918 | 0.2853 | 0.0082  | -0.0057   |
| 0.0063 | 1   | .   |                             |        |        |        |         |           |
| 6118   | CB  | CB  | . HIS HIS HIS B B 370 370 . | 0.2770 | 0.2568 | 0.2585 | 0.0076  | 0.0066    |
| 0.0012 | 1   | .   |                             |        |        |        |         |           |
| 6119   | CG  | CG  | . HIS HIS HIS B B 370 370 . | 0.2235 | 0.2426 | 0.2685 | -0.0055 | -0.0035   |
| 0.0046 | 1   | .   |                             |        |        |        |         |           |
| 6120   | ND1 | ND1 | . HIS HIS HIS B B 370 370 . | 0.3360 | 0.2639 | 0.2633 | 0.0294  | -0.0034   |
| 0.1025 | 1   | .   |                             |        |        |        |         |           |
| 6121   | CE1 | CE1 | . HIS HIS HIS B B 370 370 . | 0.3104 | 0.3063 | 0.2845 | 0.0459  | -0.0205   |
| 0.0687 | 1   | .   |                             |        |        |        |         |           |
| 6122   | NE2 | NE2 | . HIS HIS HIS B B 370 370 . | 0.3582 | 0.2419 | 0.3265 | 0.0278  | -0.0011   |
| 0.0663 | 1   | .   |                             |        |        |        |         |           |
| 6123   | CD2 | CD2 | . HIS HIS HIS B B 370 370 . | 0.2793 | 0.2315 | 0.2829 | 0.0024  | -0.0055   |
| 0.0155 | 1   | .   |                             |        |        |        |         |           |
| 6124   | C   | C   | . HIS HIS HIS B B 370 370 . | 0.2597 | 0.3010 | 0.2825 | 0.0227  | -0.0054   |
| 0.0122 | 1   | .   |                             |        |        |        |         |           |
| 6125   | O   | O   | . HIS HIS HIS B B 370 370 . | 0.2440 | 0.3267 | 0.2956 | 0.0362  | -0.0321   |
| 0.0456 | 1   | .   |                             |        |        |        |         |           |
| 6126   | N   | N   | . ARG ARG ARG B B 371 371 . | 0.2505 | 0.2878 | 0.2658 | 0.0175  | -0.0170   |
| 0.0032 | 1   | .   |                             |        |        |        |         |           |
| 6127   | CA  | CA  | . ARG ARG ARG B B 371 371 . | 0.2333 | 0.2716 | 0.2441 | 0.0048  | -0.0020   |
| 0.0153 | 1   | .   |                             |        |        |        |         |           |
| 6128   | CB  | CB  | . ARG ARG ARG B B 371 371 . | 0.2267 | 0.2529 | 0.2163 | 0.0052  | 0.0064 -  |
| 0.0021 | 1   | .   |                             |        |        |        |         |           |
| 6129   | CG  | CG  | . ARG ARG ARG B B 371 371 . | 0.2490 | 0.2917 | 0.1899 | -0.0049 | -0.0176   |
| 0.0048 | 1   | .   |                             |        |        |        |         |           |
| 6130   | CD  | CD  | . ARG ARG ARG B B 371 371 . | 0.2517 | 0.2848 | 0.2174 | -0.0054 | -0.0489   |
| 0.0397 | 1   | .   |                             |        |        |        |         |           |
| 6131   | NE  | NE  | . ARG ARG ARG B B 371 371 . | 0.2421 | 0.2565 | 0.2231 | 0.0316  | -0.0054 - |
| 0.0015 | 1   | .   |                             |        |        |        |         |           |
| 6132   | CZ  | CZ  | . ARG ARG ARG B B 371 371 . | 0.2100 | 0.2315 | 0.2170 | 0.0002  | 0.0026 -  |
| 0.0134 | 1   | .   |                             |        |        |        |         |           |



|        |     |     |                             |        |        |        |         |         |   |
|--------|-----|-----|-----------------------------|--------|--------|--------|---------|---------|---|
| 6163   | N   | N   | . GLU GLU GLU B B 376 376 . | 0.3307 | 0.3550 | 0.3412 | -0.0032 | -0.0065 |   |
| 0.0066 | 1   | .   |                             |        |        |        |         |         |   |
| 6164   | CA  | CA  | . GLU GLU GLU B B 376 376 . | 0.3544 | 0.3705 | 0.3505 | -0.0040 | -0.0103 | - |
| 0.0024 | 1   | .   |                             |        |        |        |         |         |   |
| 6165   | CB  | CB  | . GLU GLU GLU B B 376 376 . | 0.3615 | 0.3765 | 0.3597 | 0.0010  | -0.0089 |   |
| 0.0001 | 1   | .   |                             |        |        |        |         |         |   |
| 6166   | CG  | CG  | . GLU GLU GLU B B 376 376 . | 0.3927 | 0.3945 | 0.3849 | -0.0076 | 0.0146  | - |
| 0.0180 | 1   | .   |                             |        |        |        |         |         |   |
| 6167   | CD  | CD  | . GLU GLU GLU B B 376 376 . | 0.4407 | 0.4191 | 0.3897 | -0.0279 | 0.0393  | - |
| 0.0144 | 1   | .   |                             |        |        |        |         |         |   |
| 6168   | OE1 | OE1 | . GLU GLU GLU B B 376 376 . | 0.4349 | 0.4628 | 0.3945 | -0.0979 | 0.0633  | - |
| 0.0486 | 1   | .   |                             |        |        |        |         |         |   |
| 6169   | OE2 | OE2 | . GLU GLU GLU B B 376 376 . | 0.4086 | 0.4131 | 0.3603 | -0.0258 | 0.0459  |   |
| 0.0415 | 1   | .   |                             |        |        |        |         |         |   |
| 6170   | C   | C   | . GLU GLU GLU B B 376 376 . | 0.3709 | 0.3759 | 0.3529 | 0.0008  | -0.0134 | - |
| 0.0008 | 1   | .   |                             |        |        |        |         |         |   |
| 6171   | O   | O   | . GLU GLU GLU B B 376 376 . | 0.4080 | 0.3908 | 0.3407 | 0.0010  | -0.0215 | - |
| 0.0004 | 1   | .   |                             |        |        |        |         |         |   |
| 6172   | N   | N   | . ASP ASP ASP B B 377 377 . | 0.3693 | 0.3935 | 0.3538 | 0.0072  | -0.0153 | - |
| 0.0030 | 1   | .   |                             |        |        |        |         |         |   |
| 6173   | CA  | CA  | . ASP ASP ASP B B 377 377 . | 0.3489 | 0.3814 | 0.3705 | -0.0072 | 0.0008  | - |
| 0.0059 | 1   | .   |                             |        |        |        |         |         |   |
| 6174   | CB  | CB  | . ASP ASP ASP B B 377 377 . | 0.3424 | 0.3765 | 0.3661 | 0.0017  | -0.0010 | - |
| 0.0089 | 1   | .   |                             |        |        |        |         |         |   |
| 6175   | CG  | CG  | . ASP ASP ASP B B 377 377 . | 0.4071 | 0.4287 | 0.4145 | -0.0085 | 0.0145  | - |
| 0.0227 | 1   | .   |                             |        |        |        |         |         |   |
| 6176   | OD1 | OD1 | . ASP ASP ASP B B 377 377 . | 0.5780 | 0.5973 | 0.4648 | -0.0019 | -0.0138 | - |
| 0.0203 | 1   | .   |                             |        |        |        |         |         |   |
| 6177   | OD2 | OD2 | . ASP ASP ASP B B 377 377 . | 0.3268 | 0.4714 | 0.4803 | -0.0762 | 0.0425  |   |
| 0.0078 | 1   | .   |                             |        |        |        |         |         |   |
| 6178   | C   | C   | . ASP ASP ASP B B 377 377 . | 0.3511 | 0.3612 | 0.3651 | -0.0109 | -0.0040 | - |
| 0.0079 | 1   | .   |                             |        |        |        |         |         |   |
| 6179   | O   | O   | . ASP ASP ASP B B 377 377 . | 0.3604 | 0.3628 | 0.3755 | -0.0057 | 0.0108  | - |
| 0.0213 | 1   | .   |                             |        |        |        |         |         |   |
| 6180   | N   | N   | . THR THR THR B B 378 378 . | 0.3500 | 0.3738 | 0.3681 | -0.0086 | 0.0048  |   |
| 0.0025 | 1   | .   |                             |        |        |        |         |         |   |
| 6181   | CA  | CA  | . THR THR THR B B 378 378 . | 0.3519 | 0.3651 | 0.3557 | -0.0074 | 0.0006  |   |
| 0.0076 | 1   | .   |                             |        |        |        |         |         |   |
| 6182   | CB  | CB  | . THR THR THR B B 378 378 . | 0.3364 | 0.3596 | 0.3580 | 0.0020  | 0.0035  |   |
| 0.0189 | 1   | .   |                             |        |        |        |         |         |   |
| 6183   | OG1 | OG1 | . THR THR THR B B 378 378 . | 0.3589 | 0.3614 | 0.3236 | -0.0049 | -0.0581 |   |
| 0.0228 | 1   | .   |                             |        |        |        |         |         |   |
| 6184   | CG2 | CG2 | . THR THR THR B B 378 378 . | 0.3748 | 0.3838 | 0.3460 | -0.0207 | -0.0008 |   |
| 0.0318 | 1   | .   |                             |        |        |        |         |         |   |
| 6185   | C   | C   | . THR THR THR B B 378 378 . | 0.3299 | 0.3586 | 0.3569 | -0.0111 | 0.0039  |   |
| 0.0097 | 1   | .   |                             |        |        |        |         |         |   |
| 6186   | O   | O   | . THR THR THR B B 378 378 . | 0.3136 | 0.3535 | 0.3740 | -0.0383 | 0.0045  |   |
| 0.0135 | 1   | .   |                             |        |        |        |         |         |   |
| 6187   | N   | N   | . PHE PHE PHE B B 379 379 . | 0.3397 | 0.3598 | 0.3572 | -0.0150 | 0.0018  |   |
| 0.0090 | 1   | .   |                             |        |        |        |         |         |   |
| 6188   | CA  | CA  | . PHE PHE PHE B B 379 379 . | 0.3245 | 0.3631 | 0.3547 | -0.0048 | -0.0065 |   |
| 0.0154 | 1   | .   |                             |        |        |        |         |         |   |
| 6189   | CB  | CB  | . PHE PHE PHE B B 379 379 . | 0.3313 | 0.3526 | 0.3533 | -0.0171 | -0.0121 |   |
| 0.0039 | 1   | .   |                             |        |        |        |         |         |   |
| 6190   | CG  | CG  | . PHE PHE PHE B B 379 379 . | 0.3837 | 0.3864 | 0.3932 | 0.0087  | -0.0126 |   |
| 0.0265 | 1   | .   |                             |        |        |        |         |         |   |
| 6191   | CD1 | CD1 | . PHE PHE PHE B B 379 379 . | 0.4197 | 0.3959 | 0.3693 | 0.0063  | -0.0246 | - |
| 0.0196 | 1   | .   |                             |        |        |        |         |         |   |
| 6192   | CE1 | CE1 | . PHE PHE PHE B B 379 379 . | 0.3981 | 0.4342 | 0.3977 | 0.0358  | -0.0114 | - |
| 0.0187 | 1   | .   |                             |        |        |        |         |         |   |

|        |     |     |                   |         |                                          |
|--------|-----|-----|-------------------|---------|------------------------------------------|
| 6193   | CZ  | CZ  | . PHE PHE PHE B B | 379 379 | . 0.4124 0.3990 0.4258 0.0403 -0.0061    |
| 0.0140 | 1   | .   |                   |         |                                          |
| 6194   | CE2 | CE2 | . PHE PHE PHE B B | 379 379 | . 0.3849 0.3514 0.4211 0.0389 0.0068 -   |
| 0.0067 | 1   | .   |                   |         |                                          |
| 6195   | CD2 | CD2 | . PHE PHE PHE B B | 379 379 | . 0.3847 0.3736 0.4129 0.0081 -0.0365    |
| 0.0082 | 1   | .   |                   |         |                                          |
| 6196   | C   | C   | . PHE PHE PHE B B | 379 379 | . 0.3343 0.3575 0.3577 -0.0120 -0.0167   |
| 0.0021 | 1   | .   |                   |         |                                          |
| 6197   | O   | O   | . PHE PHE PHE B B | 379 379 | . 0.2991 0.3344 0.3888 -0.0059 -0.0321   |
| 0.0185 | 1   | .   |                   |         |                                          |
| 6198   | N   | N   | . ILE ILE ILE B B | 380 380 | . 0.3256 0.3726 0.3461 -0.0112 -0.0107   |
| 0.0111 | 1   | .   |                   |         |                                          |
| 6199   | CA  | CA  | . ILE ILE ILE B B | 380 380 | . 0.3256 0.3628 0.3535 -0.0149 -0.0113   |
| 0.0026 | 1   | .   |                   |         |                                          |
| 6200   | CB  | CB  | . ILE ILE ILE B B | 380 380 | . 0.3114 0.3502 0.3459 -0.0155 -0.0119   |
| 0.0057 | 1   | .   |                   |         |                                          |
| 6201   | CG1 | CG1 | . ILE ILE ILE B B | 380 380 | . 0.2991 0.3328 0.3292 -0.0171 -0.0230   |
| 0.0285 | 1   | .   |                   |         |                                          |
| 6202   | CD1 | CD1 | . ILE ILE ILE B B | 380 380 | . 0.2551 0.3630 0.3030 -0.0448 0.0145    |
| 0.0153 | 1   | .   |                   |         |                                          |
| 6203   | CG2 | CG2 | . ILE ILE ILE B B | 380 380 | . 0.2832 0.3231 0.3085 -0.0153 -0.0609   |
| 0.0043 | 1   | .   |                   |         |                                          |
| 6204   | C   | C   | . ILE ILE ILE B B | 380 380 | . 0.3318 0.3555 0.3608 -0.0154 -0.0093   |
| 0.0005 | 1   | .   |                   |         |                                          |
| 6205   | O   | O   | . ILE ILE ILE B B | 380 380 | . 0.3733 0.3947 0.3401 -0.0155 -0.0079 - |
| 0.0041 | 1   | .   |                   |         |                                          |
| 6206   | N   | N   | . ALA ALA ALA B B | 381 381 | . 0.3078 0.3423 0.3458 -0.0292 -0.0131   |
| 0.0070 | 1   | .   |                   |         |                                          |
| 6207   | CA  | CA  | . ALA ALA ALA B B | 381 381 | . 0.3070 0.3268 0.3374 -0.0143 -0.0023 - |
| 0.0101 | 1   | .   |                   |         |                                          |
| 6208   | CB  | CB  | . ALA ALA ALA B B | 381 381 | . 0.3029 0.3173 0.3317 0.0041 -0.0067 -  |
| 0.0157 | 1   | .   |                   |         |                                          |
| 6209   | C   | C   | . ALA ALA ALA B B | 381 381 | . 0.3248 0.3244 0.3349 -0.0253 -0.0031 - |
| 0.0153 | 1   | .   |                   |         |                                          |
| 6210   | O   | O   | . ALA ALA ALA B B | 381 381 | . 0.3501 0.3385 0.3527 -0.0494 0.0014 -  |
| 0.0185 | 1   | .   |                   |         |                                          |
| 6211   | N   | N   | . ASP ASP ASP B B | 382 382 | . 0.2953 0.3191 0.3391 -0.0308 0.0019 -  |
| 0.0126 | 1   | .   |                   |         |                                          |
| 6212   | CA  | CA  | . ASP ASP ASP B B | 382 382 | . 0.3418 0.3439 0.3615 -0.0232 0.0071 -  |
| 0.0016 | 1   | .   |                   |         |                                          |
| 6213   | CB  | CB  | . ASP ASP ASP B B | 382 382 | . 0.3245 0.3427 0.3633 -0.0323 0.0111 -  |
| 0.0039 | 1   | .   |                   |         |                                          |
| 6214   | CG  | CG  | . ASP ASP ASP B B | 382 382 | . 0.3751 0.3885 0.4014 -0.0355 0.0003    |
| 0.0173 | 1   | .   |                   |         |                                          |
| 6215   | OD1 | OD1 | . ASP ASP ASP B B | 382 382 | . 0.3324 0.4417 0.4514 -0.0419 0.0149    |
| 0.0514 | 1   | .   |                   |         |                                          |
| 6216   | OD2 | OD2 | . ASP ASP ASP B B | 382 382 | . 0.4644 0.3680 0.4674 -0.0640 -0.0406 - |
| 0.0094 | 1   | .   |                   |         |                                          |
| 6217   | C   | C   | . ASP ASP ASP B B | 382 382 | . 0.3371 0.3512 0.3479 -0.0217 0.0068 -  |
| 0.0030 | 1   | .   |                   |         |                                          |
| 6218   | O   | O   | . ASP ASP ASP B B | 382 382 | . 0.3483 0.3735 0.3734 -0.0357 0.0365 -  |
| 0.0020 | 1   | .   |                   |         |                                          |
| 6219   | N   | N   | . LEU LEU LEU B B | 383 383 | . 0.3392 0.3525 0.3498 -0.0121 0.0121    |
| 0.0088 | 1   | .   |                   |         |                                          |
| 6220   | CA  | CA  | . LEU LEU LEU B B | 383 383 | . 0.3138 0.3403 0.3446 0.0031 0.0019     |
| 0.0057 | 1   | .   |                   |         |                                          |
| 6221   | CB  | CB  | . LEU LEU LEU B B | 383 383 | . 0.3043 0.3401 0.3627 0.0132 -0.0016    |
| 0.0051 | 1   | .   |                   |         |                                          |
| 6222   | CG  | CG  | . LEU LEU LEU B B | 383 383 | . 0.2636 0.3340 0.3570 0.0011 0.0003     |
| 0.0193 | 1   | .   |                   |         |                                          |



|        |     |     |                             |        |        |        |         |         |   |
|--------|-----|-----|-----------------------------|--------|--------|--------|---------|---------|---|
| 6253   | N   | N   | . CYS CYS CYS B B 388 388 . | 0.4480 | 0.4402 | 0.4483 | -0.0151 | -0.0227 | - |
| 0.0136 | 1   | .   |                             |        |        |        |         |         |   |
| 6254   | CA  | CA  | . CYS CYS CYS B B 388 388 . | 0.4782 | 0.4541 | 0.4497 | -0.0113 | -0.0197 | - |
| 0.0154 | 1   | .   |                             |        |        |        |         |         |   |
| 6255   | CB  | CB  | . CYS CYS CYS B B 388 388 . | 0.4954 | 0.4763 | 0.4520 | 0.0011  | -0.0208 | - |
| 0.0222 | 1   | .   |                             |        |        |        |         |         |   |
| 6256   | SG  | SG  | . CYS CYS CYS B B 388 388 . | 0.6979 | 0.5173 | 0.5385 | -0.0488 | -0.0668 | - |
| 0.0914 | 1   | .   |                             |        |        |        |         |         |   |
| 6257   | C   | C   | . CYS CYS CYS B B 388 388 . | 0.4600 | 0.4291 | 0.4249 | -0.0031 | -0.0140 | - |
| 0.0067 | 1   | .   |                             |        |        |        |         |         |   |
| 6258   | O   | O   | . CYS CYS CYS B B 388 388 . | 0.4742 | 0.4326 | 0.4166 | 0.0145  | -0.0181 | - |
| 0.0113 | 1   | .   |                             |        |        |        |         |         |   |
| 6259   | N   | N   | . THR THR THR B B 389 389 . | 0.4259 | 0.4039 | 0.3891 | -0.0097 | -0.0150 | - |
| 0.0007 | 1   | .   |                             |        |        |        |         |         |   |
| 6260   | CA  | CA  | . THR THR THR B B 389 389 . | 0.3964 | 0.3907 | 0.3831 | -0.0017 | -0.0098 | - |
| 0.0104 | 1   | .   |                             |        |        |        |         |         |   |
| 6261   | CB  | CB  | . THR THR THR B B 389 389 . | 0.3969 | 0.3814 | 0.3816 | 0.0060  | -0.0044 | - |
| 0.0074 | 1   | .   |                             |        |        |        |         |         |   |
| 6262   | OG1 | OG1 | . THR THR THR B B 389 389 . | 0.3745 | 0.3906 | 0.3705 | 0.0201  | -0.0247 | - |
| 0.0379 | 1   | .   |                             |        |        |        |         |         |   |
| 6263   | CG2 | CG2 | . THR THR THR B B 389 389 . | 0.3441 | 0.3374 | 0.3908 | 0.0406  | -0.0083 | - |
| 0.0020 | 1   | .   |                             |        |        |        |         |         |   |
| 6264   | C   | C   | . THR THR THR B B 389 389 . | 0.3992 | 0.3781 | 0.3765 | -0.0057 | -0.0058 | - |
| 0.0077 | 1   | .   |                             |        |        |        |         |         |   |
| 6265   | O   | O   | . THR THR THR B B 389 389 . | 0.4202 | 0.3938 | 0.3882 | -0.0131 | -0.0079 | - |
| 0.0187 | 1   | .   |                             |        |        |        |         |         |   |
| 6266   | N   | N   | . GLY GLY GLY B B 390 390 . | 0.3785 | 0.3582 | 0.3413 | -0.0022 | -0.0091 | - |
| 0.0028 | 1   | .   |                             |        |        |        |         |         |   |
| 6267   | CA  | CA  | . GLY GLY GLY B B 390 390 . | 0.3367 | 0.3515 | 0.3242 | 0.0042  | -0.0105 | - |
| 0.0016 | 1   | .   |                             |        |        |        |         |         |   |
| 6268   | C   | C   | . GLY GLY GLY B B 390 390 . | 0.3433 | 0.3424 | 0.3303 | 0.0000  | 0.0061  | - |
| 0.0028 | 1   | .   |                             |        |        |        |         |         |   |
| 6269   | O   | O   | . GLY GLY GLY B B 390 390 . | 0.3160 | 0.3289 | 0.3159 | 0.0322  | 0.0118  | - |
| 0.0068 | 1   | .   |                             |        |        |        |         |         |   |
| 6270   | N   | N   | . GLN GLN GLN B B 391 391 . | 0.3504 | 0.3549 | 0.3249 | 0.0005  | 0.0010  | - |
| 0.0032 | 1   | .   |                             |        |        |        |         |         |   |
| 6271   | CA  | CA  | . GLN GLN GLN B B 391 391 . | 0.3481 | 0.3664 | 0.3241 | -0.0130 | -0.0023 | - |
| 0.0008 | 1   | .   |                             |        |        |        |         |         |   |
| 6272   | CB  | CB  | . GLN GLN GLN B B 391 391 . | 0.3460 | 0.3674 | 0.3320 | -0.0061 | 0.0077  | - |
| 0.0074 | 1   | .   |                             |        |        |        |         |         |   |
| 6273   | CG  | CG  | . GLN GLN GLN B B 391 391 . | 0.3176 | 0.3516 | 0.3414 | -0.0183 | 0.0000  | - |
| 0.0097 | 1   | .   |                             |        |        |        |         |         |   |
| 6274   | CD  | CD  | . GLN GLN GLN B B 391 391 . | 0.3552 | 0.3998 | 0.3289 | -0.0232 | 0.0057  | - |
| 0.0132 | 1   | .   |                             |        |        |        |         |         |   |
| 6275   | OE1 | OE1 | . GLN GLN GLN B B 391 391 . | 0.3510 | 0.3671 | 0.2957 | -0.0080 | 0.0418  | - |
| 0.0293 | 1   | .   |                             |        |        |        |         |         |   |
| 6276   | NE2 | NE2 | . GLN GLN GLN B B 391 391 . | 0.2886 | 0.4020 | 0.3628 | -0.0308 | 0.0170  | - |
| 0.0559 | 1   | .   |                             |        |        |        |         |         |   |
| 6277   | C   | C   | . GLN GLN GLN B B 391 391 . | 0.3467 | 0.3560 | 0.3375 | 0.0030  | -0.0035 | - |
| 0.0098 | 1   | .   |                             |        |        |        |         |         |   |
| 6278   | O   | O   | . GLN GLN GLN B B 391 391 . | 0.3465 | 0.3531 | 0.3377 | 0.0088  | -0.0217 | - |
| 0.0108 | 1   | .   |                             |        |        |        |         |         |   |
| 6279   | N   | N   | . ILE ILE ILE B B 392 392 . | 0.3305 | 0.3491 | 0.3170 | 0.0014  | -0.0050 | - |
| 0.0189 | 1   | .   |                             |        |        |        |         |         |   |
| 6280   | CA  | CA  | . ILE ILE ILE B B 392 392 . | 0.3323 | 0.3337 | 0.3002 | -0.0005 | -0.0037 | - |
| 0.0067 | 1   | .   |                             |        |        |        |         |         |   |
| 6281   | CB  | CB  | . ILE ILE ILE B B 392 392 . | 0.3444 | 0.3249 | 0.2924 | -0.0019 | -0.0072 | - |
| 0.0169 | 1   | .   |                             |        |        |        |         |         |   |
| 6282   | CG1 | CG1 | . ILE ILE ILE B B 392 392 . | 0.3483 | 0.3403 | 0.2899 | -0.0305 | -0.0086 | - |
| 0.0180 | 1   | .   |                             |        |        |        |         |         |   |





|        |     |     |                             |        |        |        |         |         |   |
|--------|-----|-----|-----------------------------|--------|--------|--------|---------|---------|---|
| 6313   | CA  | CA  | . PRO PRO PRO B B 397 397 . | 0.3241 | 0.3331 | 0.3389 | -0.0008 | 0.0112  |   |
| 0.0033 | 1   | .   |                             |        |        |        |         |         |   |
| 6314   | CB  | CB  | . PRO PRO PRO B B 397 397 . | 0.3231 | 0.3426 | 0.3342 | 0.0040  | 0.0140  |   |
| 0.0019 | 1   | .   |                             |        |        |        |         |         |   |
| 6315   | CG  | CG  | . PRO PRO PRO B B 397 397 . | 0.3456 | 0.3200 | 0.3718 | 0.0042  | 0.0250  | - |
| 0.0054 | 1   | .   |                             |        |        |        |         |         |   |
| 6316   | CD  | CD  | . PRO PRO PRO B B 397 397 . | 0.3456 | 0.3278 | 0.3385 | 0.0087  | 0.0264  |   |
| 0.0111 | 1   | .   |                             |        |        |        |         |         |   |
| 6317   | C   | C   | . PRO PRO PRO B B 397 397 . | 0.3337 | 0.3492 | 0.3541 | 0.0032  | 0.0092  |   |
| 0.0040 | 1   | .   |                             |        |        |        |         |         |   |
| 6318   | O   | O   | . PRO PRO PRO B B 397 397 . | 0.3537 | 0.3456 | 0.3630 | 0.0093  | 0.0006  |   |
| 0.0097 | 1   | .   |                             |        |        |        |         |         |   |
| 6319   | N   | N   | . CYS CYS CYS B B 398 398 . | 0.3256 | 0.3500 | 0.3489 | -0.0095 | 0.0116  | - |
| 0.0036 | 1   | .   |                             |        |        |        |         |         |   |
| 6320   | CA  | CA  | . CYS CYS CYS B B 398 398 . | 0.3169 | 0.3585 | 0.3434 | 0.0027  | -0.0015 |   |
| 0.0036 | 1   | .   |                             |        |        |        |         |         |   |
| 6321   | CB  | CB  | . CYS CYS CYS B B 398 398 . | 0.3126 | 0.3542 | 0.3439 | -0.0029 | -0.0012 |   |
| 0.0125 | 1   | .   |                             |        |        |        |         |         |   |
| 6322   | SG  | SG  | . CYS CYS CYS B B 398 398 . | 0.3258 | 0.4226 | 0.3550 | -0.0156 | 0.0106  | - |
| 0.0037 | 1   | .   |                             |        |        |        |         |         |   |
| 6323   | C   | C   | . CYS CYS CYS B B 398 398 . | 0.3195 | 0.3425 | 0.3264 | 0.0050  | 0.0051  |   |
| 0.0059 | 1   | .   |                             |        |        |        |         |         |   |
| 6324   | O   | O   | . CYS CYS CYS B B 398 398 . | 0.3386 | 0.3492 | 0.3348 | 0.0107  | 0.0142  | - |
| 0.0034 | 1   | .   |                             |        |        |        |         |         |   |
| 6325   | N   | N   | . ARG ARG ARG B B 399 399 . | 0.3294 | 0.3426 | 0.3179 | 0.0130  | -0.0262 |   |
| 0.0009 | 1   | .   |                             |        |        |        |         |         |   |
| 6326   | CA  | CA  | . ARG ARG ARG B B 399 399 . | 0.2895 | 0.3135 | 0.3058 | 0.0056  | -0.0144 | - |
| 0.0056 | 1   | .   |                             |        |        |        |         |         |   |
| 6327   | CB  | CB  | . ARG ARG ARG B B 399 399 . | 0.3068 | 0.3374 | 0.2952 | -0.0071 | -0.0177 |   |
| 0.0153 | 1   | .   |                             |        |        |        |         |         |   |
| 6328   | CG  | CG  | . ARG ARG ARG B B 399 399 . | 0.3249 | 0.3261 | 0.3111 | -0.0053 | 0.0106  |   |
| 0.0055 | 1   | .   |                             |        |        |        |         |         |   |
| 6329   | CD  | CD  | . ARG ARG ARG B B 399 399 . | 0.3792 | 0.2854 | 0.2851 | 0.0203  | 0.0581  |   |
| 0.0006 | 1   | .   |                             |        |        |        |         |         |   |
| 6330   | NE  | NE  | . ARG ARG ARG B B 399 399 . | 0.2281 | 0.2906 | 0.2909 | 0.0505  | 0.0273  |   |
| 0.0006 | 1   | .   |                             |        |        |        |         |         |   |
| 6331   | CZ  | CZ  | . ARG ARG ARG B B 399 399 . | 0.2774 | 0.3226 | 0.2823 | 0.0191  | 0.0271  | - |
| 0.0304 | 1   | .   |                             |        |        |        |         |         |   |
| 6332   | NH1 | NH1 | . ARG ARG ARG B B 399 399 . | 0.3148 | 0.3208 | 0.2349 | -0.0125 | 0.0240  | - |
| 0.0312 | 1   | .   |                             |        |        |        |         |         |   |
| 6333   | NH2 | NH2 | . ARG ARG ARG B B 399 399 . | 0.3323 | 0.2909 | 0.2532 | 0.0208  | 0.0496  | - |
| 0.0288 | 1   | .   |                             |        |        |        |         |         |   |
| 6334   | C   | C   | . ARG ARG ARG B B 399 399 . | 0.3125 | 0.3027 | 0.3077 | -0.0038 | -0.0130 | - |
| 0.0055 | 1   | .   |                             |        |        |        |         |         |   |
| 6335   | O   | O   | . ARG ARG ARG B B 399 399 . | 0.2865 | 0.3155 | 0.3342 | -0.0014 | -0.0378 | - |
| 0.0196 | 1   | .   |                             |        |        |        |         |         |   |
| 6336   | N   | N   | . SER SER SER B B 400 400 . | 0.2888 | 0.2926 | 0.3049 | -0.0025 | -0.0004 | - |
| 0.0024 | 1   | .   |                             |        |        |        |         |         |   |
| 6337   | CA  | CA  | . SER SER SER B B 400 400 . | 0.3143 | 0.3130 | 0.3022 | 0.0004  | 0.0042  |   |
| 0.0070 | 1   | .   |                             |        |        |        |         |         |   |
| 6338   | CB  | CB  | . SER SER SER B B 400 400 . | 0.3166 | 0.3144 | 0.3123 | -0.0077 | 0.0052  |   |
| 0.0048 | 1   | .   |                             |        |        |        |         |         |   |
| 6339   | OG  | OG  | . SER SER SER B B 400 400 . | 0.3776 | 0.3295 | 0.3269 | -0.0018 | 0.0277  |   |
| 0.0270 | 1   | .   |                             |        |        |        |         |         |   |
| 6340   | C   | C   | . SER SER SER B B 400 400 . | 0.2999 | 0.3172 | 0.3039 | -0.0049 | 0.0016  |   |
| 0.0072 | 1   | .   |                             |        |        |        |         |         |   |
| 6341   | O   | O   | . SER SER SER B B 400 400 . | 0.3362 | 0.3552 | 0.3081 | -0.0070 | 0.0005  |   |
| 0.0089 | 1   | .   |                             |        |        |        |         |         |   |
| 6342   | N   | N   | . GLU GLU GLU B B 401 401 . | 0.2919 | 0.3216 | 0.2979 | 0.0059  | 0.0030  |   |
| 0.0103 | 1   | .   |                             |        |        |        |         |         |   |



|        |     |     |                             |        |        |        |         |         |   |
|--------|-----|-----|-----------------------------|--------|--------|--------|---------|---------|---|
| 6373   | C   | C   | . ALA ALA ALA B B 404 404 . | 0.2123 | 0.2442 | 0.2589 | 0.0098  | 0.0203  |   |
| 0.0152 | 1   | .   |                             |        |        |        |         |         |   |
| 6374   | O   | O   | . ALA ALA ALA B B 404 404 . | 0.2379 | 0.2761 | 0.2576 | 0.0197  | 0.0241  |   |
| 0.0447 | 1   | .   |                             |        |        |        |         |         |   |
| 6375   | N   | N   | . LYS LYS LYS B B 405 405 . | 0.2537 | 0.2841 | 0.2798 | 0.0069  | 0.0109  |   |
| 0.0075 | 1   | .   |                             |        |        |        |         |         |   |
| 6376   | CA  | CA  | . LYS LYS LYS B B 405 405 . | 0.2419 | 0.2915 | 0.2926 | 0.0048  | 0.0016  |   |
| 0.0040 | 1   | .   |                             |        |        |        |         |         |   |
| 6377   | CB  | CB  | . LYS LYS LYS B B 405 405 . | 0.2284 | 0.3076 | 0.3102 | -0.0033 | 0.0085  |   |
| 0.0064 | 1   | .   |                             |        |        |        |         |         |   |
| 6378   | CG  | CG  | . LYS LYS LYS B B 405 405 . | 0.2407 | 0.2975 | 0.3046 | -0.0072 | 0.0210  | - |
| 0.0257 | 1   | .   |                             |        |        |        |         |         |   |
| 6379   | CD  | CD  | . LYS LYS LYS B B 405 405 . | 0.2062 | 0.3792 | 0.2978 | -0.0364 | 0.0030  | - |
| 0.0500 | 1   | .   |                             |        |        |        |         |         |   |
| 6380   | CE  | CE  | . LYS LYS LYS B B 405 405 . | 0.2409 | 0.3536 | 0.3164 | -0.0641 | 0.0070  | - |
| 0.0844 | 1   | .   |                             |        |        |        |         |         |   |
| 6381   | NZ  | NZ  | . LYS LYS LYS B B 405 405 . | 0.2417 | 0.4771 | 0.2743 | -0.0155 | 0.0585  | - |
| 0.0439 | 1   | .   |                             |        |        |        |         |         |   |
| 6382   | C   | C   | . LYS LYS LYS B B 405 405 . | 0.2526 | 0.3156 | 0.2982 | -0.0014 | -0.0008 | - |
| 0.0008 | 1   | .   |                             |        |        |        |         |         |   |
| 6383   | O   | O   | . LYS LYS LYS B B 405 405 . | 0.2642 | 0.3514 | 0.2949 | 0.0003  | -0.0094 | - |
| 0.0059 | 1   | .   |                             |        |        |        |         |         |   |
| 6384   | N   | N   | . TYR TYR TYR B B 406 406 . | 0.2794 | 0.3224 | 0.3046 | 0.0027  | 0.0038  |   |
| 0.0043 | 1   | .   |                             |        |        |        |         |         |   |
| 6385   | CA  | CA  | . TYR TYR TYR B B 406 406 . | 0.2711 | 0.3191 | 0.2902 | 0.0008  | 0.0039  |   |
| 0.0017 | 1   | .   |                             |        |        |        |         |         |   |
| 6386   | CB  | CB  | . TYR TYR TYR B B 406 406 . | 0.2822 | 0.3257 | 0.2859 | -0.0074 | 0.0165  |   |
| 0.0039 | 1   | .   |                             |        |        |        |         |         |   |
| 6387   | CG  | CG  | . TYR TYR TYR B B 406 406 . | 0.2824 | 0.3307 | 0.3100 | -0.0053 | 0.0056  | - |
| 0.0001 | 1   | .   |                             |        |        |        |         |         |   |
| 6388   | CD1 | CD1 | . TYR TYR TYR B B 406 406 . | 0.2389 | 0.3176 | 0.3205 | 0.0104  | -0.0272 |   |
| 0.0022 | 1   | .   |                             |        |        |        |         |         |   |
| 6389   | CE1 | CE1 | . TYR TYR TYR B B 406 406 . | 0.2518 | 0.3454 | 0.3029 | 0.0228  | -0.0308 |   |
| 0.0336 | 1   | .   |                             |        |        |        |         |         |   |
| 6390   | CZ  | CZ  | . TYR TYR TYR B B 406 406 . | 0.3214 | 0.3325 | 0.3335 | -0.0053 | -0.0083 |   |
| 0.0299 | 1   | .   |                             |        |        |        |         |         |   |
| 6391   | OH  | OH  | . TYR TYR TYR B B 406 406 . | 0.2852 | 0.3223 | 0.3309 | 0.0510  | -0.0102 |   |
| 0.0998 | 1   | .   |                             |        |        |        |         |         |   |
| 6392   | CE2 | CE2 | . TYR TYR TYR B B 406 406 . | 0.3324 | 0.3280 | 0.3121 | 0.0040  | -0.0451 |   |
| 0.0197 | 1   | .   |                             |        |        |        |         |         |   |
| 6393   | CD2 | CD2 | . TYR TYR TYR B B 406 406 . | 0.2893 | 0.3105 | 0.2903 | -0.0054 | -0.0310 | - |
| 0.0204 | 1   | .   |                             |        |        |        |         |         |   |
| 6394   | C   | C   | . TYR TYR TYR B B 406 406 . | 0.2674 | 0.3201 | 0.3028 | -0.0011 | -0.0034 | - |
| 0.0006 | 1   | .   |                             |        |        |        |         |         |   |
| 6395   | O   | O   | . TYR TYR TYR B B 406 406 . | 0.3058 | 0.3357 | 0.3253 | -0.0014 | 0.0037  | - |
| 0.0010 | 1   | .   |                             |        |        |        |         |         |   |
| 6396   | N   | N   | . ASN ASN ASN B B 407 407 . | 0.2316 | 0.3067 | 0.2875 | 0.0076  | 0.0070  |   |
| 0.0055 | 1   | .   |                             |        |        |        |         |         |   |
| 6397   | CA  | CA  | . ASN ASN ASN B B 407 407 . | 0.2295 | 0.3070 | 0.2816 | 0.0055  | -0.0109 |   |
| 0.0055 | 1   | .   |                             |        |        |        |         |         |   |
| 6398   | CB  | CB  | . ASN ASN ASN B B 407 407 . | 0.2376 | 0.2965 | 0.2982 | 0.0161  | -0.0305 |   |
| 0.0154 | 1   | .   |                             |        |        |        |         |         |   |
| 6399   | CG  | CG  | . ASN ASN ASN B B 407 407 . | 0.2340 | 0.2742 | 0.2785 | -0.0167 | -0.0089 |   |
| 0.0013 | 1   | .   |                             |        |        |        |         |         |   |
| 6400   | OD1 | OD1 | . ASN ASN ASN B B 407 407 . | 0.2343 | 0.3091 | 0.3018 | 0.0109  | -0.0361 | - |
| 0.0222 | 1   | .   |                             |        |        |        |         |         |   |
| 6401   | ND2 | ND2 | . ASN ASN ASN B B 407 407 . | 0.2930 | 0.1649 | 0.2722 | 0.0102  | 0.0342  | - |
| 0.0219 | 1   | .   |                             |        |        |        |         |         |   |
| 6402   | C   | C   | . ASN ASN ASN B B 407 407 . | 0.2647 | 0.3095 | 0.2861 | -0.0010 | -0.0173 | - |
| 0.0006 | 1   | .   |                             |        |        |        |         |         |   |

|        |     |     |                             |        |        |        |         |         |   |
|--------|-----|-----|-----------------------------|--------|--------|--------|---------|---------|---|
| 6403   | O   | O   | . ASN ASN ASN B B 407 407 . | 0.2568 | 0.3232 | 0.2883 | -0.0048 | -0.0280 | - |
| 0.0047 | 1   | .   |                             |        |        |        |         |         |   |
| 6404   | N   | N   | . GLN GLN GLN B B 408 408 . | 0.2525 | 0.3174 | 0.3026 | 0.0205  | -0.0203 |   |
| 0.0036 | 1   | .   |                             |        |        |        |         |         |   |
| 6405   | CA  | CA  | . GLN GLN GLN B B 408 408 . | 0.3039 | 0.3392 | 0.3041 | 0.0153  | -0.0138 |   |
| 0.0016 | 1   | .   |                             |        |        |        |         |         |   |
| 6406   | CB  | CB  | . GLN GLN GLN B B 408 408 . | 0.2849 | 0.3283 | 0.3076 | 0.0408  | -0.0213 | - |
| 0.0076 | 1   | .   |                             |        |        |        |         |         |   |
| 6407   | CG  | CG  | . GLN GLN GLN B B 408 408 . | 0.3005 | 0.3822 | 0.3081 | -0.0095 | -0.0183 | - |
| 0.0039 | 1   | .   |                             |        |        |        |         |         |   |
| 6408   | CD  | CD  | . GLN GLN GLN B B 408 408 . | 0.3202 | 0.3750 | 0.3585 | 0.0028  | -0.0243 |   |
| 0.0059 | 1   | .   |                             |        |        |        |         |         |   |
| 6409   | OE1 | OE1 | . GLN GLN GLN B B 408 408 . | 0.3700 | 0.3237 | 0.3977 | 0.0478  | -0.0447 | - |
| 0.0344 | 1   | .   |                             |        |        |        |         |         |   |
| 6410   | NE2 | NE2 | . GLN GLN GLN B B 408 408 . | 0.2768 | 0.3862 | 0.3796 | -0.0286 | -0.0342 |   |
| 0.0237 | 1   | .   |                             |        |        |        |         |         |   |
| 6411   | C   | C   | . GLN GLN GLN B B 408 408 . | 0.3190 | 0.3452 | 0.3281 | 0.0078  | -0.0159 |   |
| 0.0106 | 1   | .   |                             |        |        |        |         |         |   |
| 6412   | O   | O   | . GLN GLN GLN B B 408 408 . | 0.2987 | 0.3517 | 0.3314 | -0.0026 | -0.0077 |   |
| 0.0274 | 1   | .   |                             |        |        |        |         |         |   |
| 6413   | N   | N   | . LEU LEU LEU B B 409 409 . | 0.3253 | 0.3521 | 0.3150 | 0.0047  | 0.0010  |   |
| 0.0184 | 1   | .   |                             |        |        |        |         |         |   |
| 6414   | CA  | CA  | . LEU LEU LEU B B 409 409 . | 0.3325 | 0.3489 | 0.3387 | -0.0029 | -0.0038 |   |
| 0.0056 | 1   | .   |                             |        |        |        |         |         |   |
| 6415   | CB  | CB  | . LEU LEU LEU B B 409 409 . | 0.3324 | 0.3435 | 0.3272 | -0.0005 | -0.0162 |   |
| 0.0223 | 1   | .   |                             |        |        |        |         |         |   |
| 6416   | CG  | CG  | . LEU LEU LEU B B 409 409 . | 0.3120 | 0.3404 | 0.3324 | -0.0115 | -0.0230 |   |
| 0.0222 | 1   | .   |                             |        |        |        |         |         |   |
| 6417   | CD1 | CD1 | . LEU LEU LEU B B 409 409 . | 0.2505 | 0.3758 | 0.3159 | 0.0138  | -0.0140 |   |
| 0.0579 | 1   | .   |                             |        |        |        |         |         |   |
| 6418   | CD2 | CD2 | . LEU LEU LEU B B 409 409 . | 0.2206 | 0.3284 | 0.3649 | 0.0346  | -0.0091 |   |
| 0.0732 | 1   | .   |                             |        |        |        |         |         |   |
| 6419   | C   | C   | . LEU LEU LEU B B 409 409 . | 0.3408 | 0.3398 | 0.3441 | -0.0103 | -0.0092 |   |
| 0.0105 | 1   | .   |                             |        |        |        |         |         |   |
| 6420   | O   | O   | . LEU LEU LEU B B 409 409 . | 0.3777 | 0.3587 | 0.3495 | -0.0069 | -0.0011 |   |
| 0.0050 | 1   | .   |                             |        |        |        |         |         |   |
| 6421   | N   | N   | . MET MET MET B B 410 410 . | 0.3414 | 0.3371 | 0.3596 | -0.0164 | -0.0103 |   |
| 0.0093 | 1   | .   |                             |        |        |        |         |         |   |
| 6422   | CA  | CA  | . MET MET MET B B 410 410 . | 0.3405 | 0.3435 | 0.3479 | -0.0080 | -0.0052 | - |
| 0.0020 | 1   | .   |                             |        |        |        |         |         |   |
| 6423   | CB  | CB  | . MET MET MET B B 410 410 . | 0.3136 | 0.3355 | 0.3304 | 0.0070  | -0.0115 |   |
| 0.0108 | 1   | .   |                             |        |        |        |         |         |   |
| 6424   | CG  | CG  | . MET MET MET B B 410 410 . | 0.3518 | 0.3581 | 0.3492 | 0.0006  | 0.0066  |   |
| 0.0107 | 1   | .   |                             |        |        |        |         |         |   |
| 6425   | SD  | SD  | . MET MET MET B B 410 410 . | 0.4423 | 0.4609 | 0.4638 | 0.0281  | -0.0021 |   |
| 0.0401 | 1   | .   |                             |        |        |        |         |         |   |
| 6426   | CE  | CE  | . MET MET MET B B 410 410 . | 0.4360 | 0.3904 | 0.3633 | 0.0466  | -0.0072 |   |
| 0.0299 | 1   | .   |                             |        |        |        |         |         |   |
| 6427   | C   | C   | . MET MET MET B B 410 410 . | 0.3392 | 0.3400 | 0.3348 | -0.0118 | -0.0088 |   |
| 0.0059 | 1   | .   |                             |        |        |        |         |         |   |
| 6428   | O   | O   | . MET MET MET B B 410 410 . | 0.3453 | 0.3641 | 0.3340 | -0.0265 | -0.0243 |   |
| 0.0104 | 1   | .   |                             |        |        |        |         |         |   |
| 6429   | N   | N   | . ARG ARG ARG B B 411 411 . | 0.3399 | 0.3540 | 0.3363 | 0.0001  | -0.0104 |   |
| 0.0043 | 1   | .   |                             |        |        |        |         |         |   |
| 6430   | CA  | CA  | . ARG ARG ARG B B 411 411 . | 0.3593 | 0.3561 | 0.3401 | -0.0016 | -0.0155 |   |
| 0.0090 | 1   | .   |                             |        |        |        |         |         |   |
| 6431   | CB  | CB  | . ARG ARG ARG B B 411 411 . | 0.3585 | 0.3550 | 0.3360 | -0.0026 | -0.0120 |   |
| 0.0160 | 1   | .   |                             |        |        |        |         |         |   |
| 6432   | CG  | CG  | . ARG ARG ARG B B 411 411 . | 0.3986 | 0.3666 | 0.3403 | 0.0220  | -0.0242 | - |
| 0.0073 | 1   | .   |                             |        |        |        |         |         |   |

|        |     |     |                             |        |        |        |         |         |   |
|--------|-----|-----|-----------------------------|--------|--------|--------|---------|---------|---|
| 6433   | CD  | CD  | . ARG ARG ARG B B 411 411 . | 0.4130 | 0.3914 | 0.3364 | -0.0010 | -0.0190 |   |
| 0.0082 | 1   | .   |                             |        |        |        |         |         |   |
| 6434   | NE  | NE  | . ARG ARG ARG B B 411 411 . | 0.4033 | 0.3505 | 0.3205 | -0.0227 | -0.0158 | - |
| 0.0078 | 1   | .   |                             |        |        |        |         |         |   |
| 6435   | CZ  | CZ  | . ARG ARG ARG B B 411 411 . | 0.3823 | 0.3367 | 0.3166 | -0.0207 | -0.0137 |   |
| 0.0187 | 1   | .   |                             |        |        |        |         |         |   |
| 6436   | NH1 | NH1 | . ARG ARG ARG B B 411 411 . | 0.3757 | 0.3273 | 0.3687 | 0.0147  | -0.0479 | - |
| 0.0192 | 1   | .   |                             |        |        |        |         |         |   |
| 6437   | NH2 | NH2 | . ARG ARG ARG B B 411 411 . | 0.3998 | 0.2745 | 0.3397 | -0.0850 | -0.0072 |   |
| 0.0561 | 1   | .   |                             |        |        |        |         |         |   |
| 6438   | C   | C   | . ARG ARG ARG B B 411 411 . | 0.3768 | 0.3762 | 0.3576 | -0.0076 | -0.0148 |   |
| 0.0000 | 1   | .   |                             |        |        |        |         |         |   |
| 6439   | O   | O   | . ARG ARG ARG B B 411 411 . | 0.4068 | 0.4207 | 0.3508 | 0.0036  | -0.0285 | - |
| 0.0026 | 1   | .   |                             |        |        |        |         |         |   |
| 6440   | N   | N   | . ILE ILE ILE B B 412 412 . | 0.3836 | 0.3745 | 0.3577 | -0.0016 | -0.0179 |   |
| 0.0066 | 1   | .   |                             |        |        |        |         |         |   |
| 6441   | CA  | CA  | . ILE ILE ILE B B 412 412 . | 0.3915 | 0.3792 | 0.3824 | -0.0054 | -0.0119 |   |
| 0.0005 | 1   | .   |                             |        |        |        |         |         |   |
| 6442   | CB  | CB  | . ILE ILE ILE B B 412 412 . | 0.4025 | 0.3638 | 0.3699 | -0.0008 | -0.0156 | - |
| 0.0004 | 1   | .   |                             |        |        |        |         |         |   |
| 6443   | CG1 | CG1 | . ILE ILE ILE B B 412 412 . | 0.3838 | 0.3695 | 0.4040 | 0.0032  | -0.0123 | - |
| 0.0047 | 1   | .   |                             |        |        |        |         |         |   |
| 6444   | CD1 | CD1 | . ILE ILE ILE B B 412 412 . | 0.4378 | 0.3436 | 0.3232 | 0.0663  | -0.0182 |   |
| 0.0205 | 1   | .   |                             |        |        |        |         |         |   |
| 6445   | CG2 | CG2 | . ILE ILE ILE B B 412 412 . | 0.4302 | 0.3490 | 0.3760 | -0.0186 | -0.0127 |   |
| 0.0117 | 1   | .   |                             |        |        |        |         |         |   |
| 6446   | C   | C   | . ILE ILE ILE B B 412 412 . | 0.3910 | 0.3916 | 0.3893 | -0.0053 | -0.0045 | - |
| 0.0002 | 1   | .   |                             |        |        |        |         |         |   |
| 6447   | O   | O   | . ILE ILE ILE B B 412 412 . | 0.3814 | 0.4262 | 0.3641 | 0.0041  | -0.0187 |   |
| 0.0032 | 1   | .   |                             |        |        |        |         |         |   |
| 6448   | N   | N   | . GLU GLU GLU B B 413 413 . | 0.3899 | 0.3980 | 0.4115 | -0.0063 | 0.0078  |   |
| 0.0074 | 1   | .   |                             |        |        |        |         |         |   |
| 6449   | CA  | CA  | . GLU GLU GLU B B 413 413 . | 0.4143 | 0.4166 | 0.4322 | -0.0056 | 0.0048  |   |
| 0.0081 | 1   | .   |                             |        |        |        |         |         |   |
| 6450   | CB  | CB  | . GLU GLU GLU B B 413 413 . | 0.4053 | 0.4130 | 0.4177 | 0.0008  | 0.0144  |   |
| 0.0101 | 1   | .   |                             |        |        |        |         |         |   |
| 6451   | CG  | CG  | . GLU GLU GLU B B 413 413 . | 0.4258 | 0.3833 | 0.4569 | 0.0286  | 0.0193  |   |
| 0.0039 | 1   | .   |                             |        |        |        |         |         |   |
| 6452   | CD  | CD  | . GLU GLU GLU B B 413 413 . | 0.4404 | 0.4203 | 0.4386 | 0.0308  | 0.0390  |   |
| 0.0000 | 1   | .   |                             |        |        |        |         |         |   |
| 6453   | OE1 | OE1 | . GLU GLU GLU B B 413 413 . | 0.4392 | 0.4256 | 0.3734 | 0.0691  | 0.0788  |   |
| 0.0000 | 1   | .   |                             |        |        |        |         |         |   |
| 6454   | OE2 | OE2 | . GLU GLU GLU B B 413 413 . | 0.5497 | 0.4667 | 0.4195 | 0.0470  | 0.0056  |   |
| 0.0122 | 1   | .   |                             |        |        |        |         |         |   |
| 6455   | C   | C   | . GLU GLU GLU B B 413 413 . | 0.4356 | 0.4461 | 0.4490 | -0.0165 | -0.0023 |   |
| 0.0044 | 1   | .   |                             |        |        |        |         |         |   |
| 6456   | O   | O   | . GLU GLU GLU B B 413 413 . | 0.4421 | 0.4640 | 0.4481 | -0.0240 | -0.0177 |   |
| 0.0179 | 1   | .   |                             |        |        |        |         |         |   |
| 6457   | N   | N   | . GLU GLU GLU B B 414 414 . | 0.4466 | 0.4679 | 0.4690 | -0.0125 | -0.0068 |   |
| 0.0020 | 1   | .   |                             |        |        |        |         |         |   |
| 6458   | CA  | CA  | . GLU GLU GLU B B 414 414 . | 0.4719 | 0.4897 | 0.4879 | -0.0124 | -0.0021 |   |
| 0.0035 | 1   | .   |                             |        |        |        |         |         |   |
| 6459   | CB  | CB  | . GLU GLU GLU B B 414 414 . | 0.4754 | 0.4982 | 0.4994 | -0.0064 | -0.0028 |   |
| 0.0000 | 1   | .   |                             |        |        |        |         |         |   |
| 6460   | CG  | CG  | . GLU GLU GLU B B 414 414 . | 0.4964 | 0.5391 | 0.5220 | 0.0057  | -0.0103 |   |
| 0.0087 | 1   | .   |                             |        |        |        |         |         |   |
| 6461   | CD  | CD  | . GLU GLU GLU B B 414 414 . | 0.5394 | 0.6065 | 0.5254 | 0.0158  | -0.0157 |   |
| 0.0111 | 1   | .   |                             |        |        |        |         |         |   |
| 6462   | OE1 | OE1 | . GLU GLU GLU B B 414 414 . | 0.4964 | 0.5923 | 0.5137 | 0.0686  | -0.0514 | - |
| 0.0139 | 1   | .   |                             |        |        |        |         |         |   |

|        |     |     |                             |        |        |        |         |         |   |
|--------|-----|-----|-----------------------------|--------|--------|--------|---------|---------|---|
| 6463   | OE2 | OE2 | . GLU GLU GLU B B 414 414 . | 0.5988 | 0.6372 | 0.5551 | 0.0166  | 0.0027  |   |
| 0.0695 | 1   | .   |                             |        |        |        |         |         |   |
| 6464   | C   | C   | . GLU GLU GLU B B 414 414 . | 0.4968 | 0.5042 | 0.5026 | -0.0145 | -0.0015 |   |
| 0.0000 | 1   | .   |                             |        |        |        |         |         |   |
| 6465   | O   | O   | . GLU GLU GLU B B 414 414 . | 0.4937 | 0.5154 | 0.5183 | -0.0319 | -0.0024 |   |
| 0.0046 | 1   | .   |                             |        |        |        |         |         |   |
| 6466   | N   | N   | . GLU GLU GLU B B 415 415 . | 0.5051 | 0.5060 | 0.5210 | -0.0076 | 0.0001  | - |
| 0.0038 | 1   | .   |                             |        |        |        |         |         |   |
| 6467   | CA  | CA  | . GLU GLU GLU B B 415 415 . | 0.5265 | 0.5385 | 0.5401 | -0.0134 | -0.0007 | - |
| 0.0058 | 1   | .   |                             |        |        |        |         |         |   |
| 6468   | CB  | CB  | . GLU GLU GLU B B 415 415 . | 0.5110 | 0.5351 | 0.5483 | -0.0112 | -0.0032 | - |
| 0.0021 | 1   | .   |                             |        |        |        |         |         |   |
| 6469   | CG  | CG  | . GLU GLU GLU B B 415 415 . | 0.5597 | 0.6010 | 0.5983 | -0.0062 | 0.0135  |   |
| 0.0095 | 1   | .   |                             |        |        |        |         |         |   |
| 6470   | CD  | CD  | . GLU GLU GLU B B 415 415 . | 0.6010 | 0.6805 | 0.6583 | -0.0093 | 0.0125  |   |
| 0.0287 | 1   | .   |                             |        |        |        |         |         |   |
| 6471   | OE1 | OE1 | . GLU GLU GLU B B 415 415 . | 0.7246 | 0.7191 | 0.7208 | -0.0164 | 0.0460  |   |
| 0.0479 | 1   | .   |                             |        |        |        |         |         |   |
| 6472   | OE2 | OE2 | . GLU GLU GLU B B 415 415 . | 0.5710 | 0.6970 | 0.6014 | -0.0163 | 0.0152  |   |
| 0.0304 | 1   | .   |                             |        |        |        |         |         |   |
| 6473   | C   | C   | . GLU GLU GLU B B 415 415 . | 0.5469 | 0.5520 | 0.5524 | -0.0124 | 0.0009  | - |
| 0.0070 | 1   | .   |                             |        |        |        |         |         |   |
| 6474   | O   | O   | . GLU GLU GLU B B 415 415 . | 0.5648 | 0.5704 | 0.5654 | -0.0185 | -0.0007 | - |
| 0.0229 | 1   | .   |                             |        |        |        |         |         |   |
| 6475   | N   | N   | . LEU LEU LEU B B 416 416 . | 0.5641 | 0.5529 | 0.5529 | -0.0131 | -0.0017 |   |
| 0.0001 | 1   | .   |                             |        |        |        |         |         |   |
| 6476   | CA  | CA  | . LEU LEU LEU B B 416 416 . | 0.5624 | 0.5599 | 0.5632 | -0.0078 | -0.0165 |   |
| 0.0021 | 1   | .   |                             |        |        |        |         |         |   |
| 6477   | CB  | CB  | . LEU LEU LEU B B 416 416 . | 0.5544 | 0.5491 | 0.5547 | -0.0092 | -0.0206 |   |
| 0.0016 | 1   | .   |                             |        |        |        |         |         |   |
| 6478   | CG  | CG  | . LEU LEU LEU B B 416 416 . | 0.5557 | 0.5737 | 0.5494 | -0.0106 | -0.0301 |   |
| 0.0032 | 1   | .   |                             |        |        |        |         |         |   |
| 6479   | CD1 | CD1 | . LEU LEU LEU B B 416 416 . | 0.5370 | 0.5805 | 0.5616 | -0.0203 | -0.0475 |   |
| 0.0067 | 1   | .   |                             |        |        |        |         |         |   |
| 6480   | CD2 | CD2 | . LEU LEU LEU B B 416 416 . | 0.5425 | 0.5817 | 0.5420 | -0.0001 | -0.0532 |   |
| 0.0108 | 1   | .   |                             |        |        |        |         |         |   |
| 6481   | C   | C   | . LEU LEU LEU B B 416 416 . | 0.5727 | 0.5550 | 0.5779 | -0.0060 | -0.0163 |   |
| 0.0090 | 1   | .   |                             |        |        |        |         |         |   |
| 6482   | O   | O   | . LEU LEU LEU B B 416 416 . | 0.5653 | 0.5307 | 0.5805 | -0.0138 | -0.0236 |   |
| 0.0081 | 1   | .   |                             |        |        |        |         |         |   |
| 6483   | N   | N   | . GLY GLY GLY B B 417 417 . | 0.5781 | 0.5737 | 0.5913 | -0.0047 | -0.0182 |   |
| 0.0103 | 1   | .   |                             |        |        |        |         |         |   |
| 6484   | CA  | CA  | . GLY GLY GLY B B 417 417 . | 0.5929 | 0.5941 | 0.6016 | 0.0024  | -0.0136 | - |
| 0.0027 | 1   | .   |                             |        |        |        |         |         |   |
| 6485   | C   | C   | . GLY GLY GLY B B 417 417 . | 0.6140 | 0.6193 | 0.6108 | 0.0028  | -0.0108 | - |
| 0.0004 | 1   | .   |                             |        |        |        |         |         |   |
| 6486   | O   | O   | . GLY GLY GLY B B 417 417 . | 0.6065 | 0.5921 | 0.5993 | 0.0032  | -0.0205 |   |
| 0.0000 | 1   | .   |                             |        |        |        |         |         |   |
| 6487   | N   | N   | . ASP ASP ASP B B 418 418 . | 0.6415 | 0.6325 | 0.6368 | -0.0029 | -0.0039 | - |
| 0.0073 | 1   | .   |                             |        |        |        |         |         |   |
| 6488   | CA  | CA  | . ASP ASP ASP B B 418 418 . | 0.6775 | 0.6746 | 0.6670 | -0.0059 | -0.0059 | - |
| 0.0086 | 1   | .   |                             |        |        |        |         |         |   |
| 6489   | CB  | CB  | . ASP ASP ASP B B 418 418 . | 0.6896 | 0.7052 | 0.6910 | -0.0127 | 0.0011  | - |
| 0.0131 | 1   | .   |                             |        |        |        |         |         |   |
| 6490   | CG  | CG  | . ASP ASP ASP B B 418 418 . | 0.7416 | 0.7939 | 0.7368 | -0.0020 | -0.0051 | - |
| 0.0039 | 1   | .   |                             |        |        |        |         |         |   |
| 6491   | OD1 | OD1 | . ASP ASP ASP B B 418 418 . | 0.7285 | 0.8838 | 0.8264 | -0.0040 | 0.0011  |   |
| 0.0128 | 1   | .   |                             |        |        |        |         |         |   |
| 6492   | OD2 | OD2 | . ASP ASP ASP B B 418 418 . | 0.7458 | 0.8846 | 0.8137 | -0.0195 | 0.0282  |   |
| 0.0113 | 1   | .   |                             |        |        |        |         |         |   |

|        |     |     |                             |        |        |        |         |         |   |
|--------|-----|-----|-----------------------------|--------|--------|--------|---------|---------|---|
| 6493   | C   | C   | . ASP ASP ASP B B 418 418 . | 0.6716 | 0.6651 | 0.6653 | -0.0091 | -0.0051 | - |
| 0.0098 | 1   | .   |                             |        |        |        |         |         |   |
| 6494   | O   | O   | . ASP ASP ASP B B 418 418 . | 0.6768 | 0.6592 | 0.6724 | -0.0174 | -0.0014 | - |
| 0.0140 | 1   | .   |                             |        |        |        |         |         |   |
| 6495   | N   | N   | . GLU GLU GLU B B 419 419 . | 0.6686 | 0.6589 | 0.6597 | -0.0080 | -0.0093 | - |
| 0.0087 | 1   | .   |                             |        |        |        |         |         |   |
| 6496   | CA  | CA  | . GLU GLU GLU B B 419 419 . | 0.6608 | 0.6594 | 0.6616 | -0.0051 | -0.0142 | - |
| 0.0080 | 1   | .   |                             |        |        |        |         |         |   |
| 6497   | CB  | CB  | . GLU GLU GLU B B 419 419 . | 0.6666 | 0.6817 | 0.6683 | -0.0001 | -0.0061 | - |
| 0.0100 | 1   | .   |                             |        |        |        |         |         |   |
| 6498   | CG  | CG  | . GLU GLU GLU B B 419 419 . | 0.7188 | 0.7316 | 0.7208 | -0.0114 | -0.0066 | - |
| 0.0297 | 1   | .   |                             |        |        |        |         |         |   |
| 6499   | CD  | CD  | . GLU GLU GLU B B 419 419 . | 0.7595 | 0.7955 | 0.7881 | -0.0216 | 0.0060  | - |
| 0.0521 | 1   | .   |                             |        |        |        |         |         |   |
| 6500   | OE1 | OE1 | . GLU GLU GLU B B 419 419 . | 0.8200 | 0.7947 | 0.7786 | -0.0356 | 0.0258  | - |
| 0.0663 | 1   | .   |                             |        |        |        |         |         |   |
| 6501   | OE2 | OE2 | . GLU GLU GLU B B 419 419 . | 0.7835 | 0.8132 | 0.8027 | -0.0559 | -0.0190 | - |
| 0.0607 | 1   | .   |                             |        |        |        |         |         |   |
| 6502   | C   | C   | . GLU GLU GLU B B 419 419 . | 0.6501 | 0.6422 | 0.6493 | 0.0031  | -0.0210 | - |
| 0.0034 | 1   | .   |                             |        |        |        |         |         |   |
| 6503   | O   | O   | . GLU GLU GLU B B 419 419 . | 0.6660 | 0.6422 | 0.6662 | 0.0059  | -0.0321 | - |
| 0.0021 | 1   | .   |                             |        |        |        |         |         |   |
| 6504   | N   | N   | . ALA ALA ALA B B 420 420 . | 0.6301 | 0.6125 | 0.6209 | -0.0068 | -0.0206 | - |
| 0.0044 | 1   | .   |                             |        |        |        |         |         |   |
| 6505   | CA  | CA  | . ALA ALA ALA B B 420 420 . | 0.5948 | 0.5811 | 0.5829 | 0.0006  | -0.0197 | - |
| 0.0026 | 1   | .   |                             |        |        |        |         |         |   |
| 6506   | CB  | CB  | . ALA ALA ALA B B 420 420 . | 0.5997 | 0.5710 | 0.5834 | 0.0017  | -0.0205 | - |
| 0.0015 | 1   | .   |                             |        |        |        |         |         |   |
| 6507   | C   | C   | . ALA ALA ALA B B 420 420 . | 0.5749 | 0.5565 | 0.5485 | 0.0024  | -0.0212 | - |
| 0.0035 | 1   | .   |                             |        |        |        |         |         |   |
| 6508   | O   | O   | . ALA ALA ALA B B 420 420 . | 0.5671 | 0.5546 | 0.5418 | 0.0079  | -0.0408 | - |
| 0.0012 | 1   | .   |                             |        |        |        |         |         |   |
| 6509   | N   | N   | . ARG ARG ARG B B 421 421 . | 0.5534 | 0.5340 | 0.5259 | 0.0056  | -0.0214 | - |
| 0.0141 | 1   | .   |                             |        |        |        |         |         |   |
| 6510   | CA  | CA  | . ARG ARG ARG B B 421 421 . | 0.5394 | 0.5164 | 0.5287 | -0.0001 | -0.0151 | - |
| 0.0033 | 1   | .   |                             |        |        |        |         |         |   |
| 6511   | CB  | CB  | . ARG ARG ARG B B 421 421 . | 0.5626 | 0.5351 | 0.5340 | -0.0010 | -0.0167 | - |
| 0.0055 | 1   | .   |                             |        |        |        |         |         |   |
| 6512   | CG  | CG  | . ARG ARG ARG B B 421 421 . | 0.5980 | 0.6100 | 0.6085 | -0.0272 | -0.0119 | - |
| 0.0026 | 1   | .   |                             |        |        |        |         |         |   |
| 6513   | CD  | CD  | . ARG ARG ARG B B 421 421 . | 0.7324 | 0.7479 | 0.6946 | -0.0217 | -0.0401 | - |
| 0.0059 | 1   | .   |                             |        |        |        |         |         |   |
| 6514   | NE  | NE  | . ARG ARG ARG B B 421 421 . | 0.7815 | 0.8671 | 0.8142 | -0.0124 | -0.0109 | - |
| 0.0256 | 1   | .   |                             |        |        |        |         |         |   |
| 6515   | CZ  | CZ  | . ARG ARG ARG B B 421 421 . | 0.8301 | 0.9045 | 0.8579 | -0.0048 | -0.0077 | - |
| 0.0325 | 1   | .   |                             |        |        |        |         |         |   |
| 6516   | NH1 | NH1 | . ARG ARG ARG B B 421 421 . | 0.8285 | 0.9075 | 0.8781 | 0.0015  | 0.0278  | - |
| 0.0155 | 1   | .   |                             |        |        |        |         |         |   |
| 6517   | NH2 | NH2 | . ARG ARG ARG B B 421 421 . | 0.8974 | 0.9359 | 0.8661 | 0.0154  | -0.0005 | - |
| 0.0369 | 1   | .   |                             |        |        |        |         |         |   |
| 6518   | C   | C   | . ARG ARG ARG B B 421 421 . | 0.5151 | 0.4991 | 0.4982 | 0.0105  | -0.0104 | - |
| 0.0023 | 1   | .   |                             |        |        |        |         |         |   |
| 6519   | O   | O   | . ARG ARG ARG B B 421 421 . | 0.5326 | 0.5044 | 0.5047 | 0.0021  | -0.0156 | - |
| 0.0023 | 1   | .   |                             |        |        |        |         |         |   |
| 6520   | N   | N   | . PHE PHE PHE B B 422 422 . | 0.4877 | 0.4617 | 0.4736 | 0.0091  | -0.0068 | - |
| 0.0014 | 1   | .   |                             |        |        |        |         |         |   |
| 6521   | CA  | CA  | . PHE PHE PHE B B 422 422 . | 0.4626 | 0.4473 | 0.4520 | 0.0094  | -0.0006 | - |
| 0.0071 | 1   | .   |                             |        |        |        |         |         |   |
| 6522   | CB  | CB  | . PHE PHE PHE B B 422 422 . | 0.4523 | 0.4269 | 0.4401 | 0.0052  | -0.0163 | - |
| 0.0075 | 1   | .   |                             |        |        |        |         |         |   |





|        |     |     |                             |        |        |        |         |         |   |
|--------|-----|-----|-----------------------------|--------|--------|--------|---------|---------|---|
| 6553   | CG  | CG  | . ASN ASN ASN B B 426 426 . | 0.5731 | 0.5072 | 0.5098 | 0.0039  | -0.0063 | - |
| 0.0171 | 1   | .   |                             |        |        |        |         |         |   |
| 6554   | OD1 | OD1 | . ASN ASN ASN B B 426 426 . | 0.6474 | 0.5938 | 0.4810 | -0.0263 | -0.0112 | - |
| 0.0203 | 1   | .   |                             |        |        |        |         |         |   |
| 6555   | ND2 | ND2 | . ASN ASN ASN B B 426 426 . | 0.6398 | 0.5334 | 0.6159 | 0.0106  | 0.0007  | - |
| 0.0398 | 1   | .   |                             |        |        |        |         |         |   |
| 6556   | C   | C   | . ASN ASN ASN B B 426 426 . | 0.4269 | 0.4306 | 0.4349 | -0.0067 | -0.0077 | - |
| 0.0140 | 1   | .   |                             |        |        |        |         |         |   |
| 6557   | O   | O   | . ASN ASN ASN B B 426 426 . | 0.3887 | 0.4082 | 0.4408 | -0.0073 | -0.0210 | - |
| 0.0187 | 1   | .   |                             |        |        |        |         |         |   |
| 6558   | N   | N   | . PHE PHE PHE B B 427 427 . | 0.4129 | 0.4213 | 0.4242 | -0.0045 | -0.0098 | - |
| 0.0115 | 1   | .   |                             |        |        |        |         |         |   |
| 6559   | CA  | CA  | . PHE PHE PHE B B 427 427 . | 0.4076 | 0.4256 | 0.4207 | -0.0012 | -0.0068 | - |
| 0.0146 | 1   | .   |                             |        |        |        |         |         |   |
| 6560   | CB  | CB  | . PHE PHE PHE B B 427 427 . | 0.4170 | 0.4215 | 0.4112 | -0.0006 | -0.0148 | - |
| 0.0132 | 1   | .   |                             |        |        |        |         |         |   |
| 6561   | CG  | CG  | . PHE PHE PHE B B 427 427 . | 0.3745 | 0.4003 | 0.3811 | 0.0022  | -0.0254 | - |
| 0.0146 | 1   | .   |                             |        |        |        |         |         |   |
| 6562   | CD1 | CD1 | . PHE PHE PHE B B 427 427 . | 0.4341 | 0.4209 | 0.3806 | 0.0063  | -0.0087 | - |
| 0.0255 | 1   | .   |                             |        |        |        |         |         |   |
| 6563   | CE1 | CE1 | . PHE PHE PHE B B 427 427 . | 0.4328 | 0.4405 | 0.4238 | -0.0114 | -0.0135 | - |
| 0.0041 | 1   | .   |                             |        |        |        |         |         |   |
| 6564   | CZ  | CZ  | . PHE PHE PHE B B 427 427 . | 0.4286 | 0.4283 | 0.4238 | 0.0388  | -0.0123 | - |
| 0.0074 | 1   | .   |                             |        |        |        |         |         |   |
| 6565   | CE2 | CE2 | . PHE PHE PHE B B 427 427 . | 0.3879 | 0.4320 | 0.4059 | 0.0288  | 0.0045  | - |
| 0.0039 | 1   | .   |                             |        |        |        |         |         |   |
| 6566   | CD2 | CD2 | . PHE PHE PHE B B 427 427 . | 0.4187 | 0.4092 | 0.4120 | 0.0170  | -0.0251 | - |
| 0.0370 | 1   | .   |                             |        |        |        |         |         |   |
| 6567   | C   | C   | . PHE PHE PHE B B 427 427 . | 0.4231 | 0.4329 | 0.4330 | 0.0029  | -0.0012 | - |
| 0.0074 | 1   | .   |                             |        |        |        |         |         |   |
| 6568   | O   | O   | . PHE PHE PHE B B 427 427 . | 0.4250 | 0.4361 | 0.4059 | 0.0049  | 0.0058  | - |
| 0.0048 | 1   | .   |                             |        |        |        |         |         |   |
| 6569   | N   | N   | . ARG ARG ARG B B 428 428 . | 0.4295 | 0.4430 | 0.4318 | -0.0028 | 0.0026  | - |
| 0.0103 | 1   | .   |                             |        |        |        |         |         |   |
| 6570   | CA  | CA  | . ARG ARG ARG B B 428 428 . | 0.4429 | 0.4491 | 0.4421 | -0.0010 | -0.0041 | - |
| 0.0029 | 1   | .   |                             |        |        |        |         |         |   |
| 6571   | CB  | CB  | . ARG ARG ARG B B 428 428 . | 0.4297 | 0.4461 | 0.4333 | 0.0031  | -0.0094 | - |
| 0.0029 | 1   | .   |                             |        |        |        |         |         |   |
| 6572   | CG  | CG  | . ARG ARG ARG B B 428 428 . | 0.4389 | 0.4387 | 0.4166 | -0.0357 | -0.0138 | - |
| 0.0044 | 1   | .   |                             |        |        |        |         |         |   |
| 6573   | CD  | CD  | . ARG ARG ARG B B 428 428 . | 0.3996 | 0.4460 | 0.4067 | -0.0212 | -0.0413 | - |
| 0.0131 | 1   | .   |                             |        |        |        |         |         |   |
| 6574   | NE  | NE  | . ARG ARG ARG B B 428 428 . | 0.3990 | 0.4076 | 0.4092 | -0.0349 | -0.0301 | - |
| 0.0000 | 1   | .   |                             |        |        |        |         |         |   |
| 6575   | CZ  | CZ  | . ARG ARG ARG B B 428 428 . | 0.3914 | 0.4175 | 0.3547 | -0.0215 | -0.0361 | - |
| 0.0065 | 1   | .   |                             |        |        |        |         |         |   |
| 6576   | NH1 | NH1 | . ARG ARG ARG B B 428 428 . | 0.3916 | 0.4450 | 0.2898 | -0.0406 | -0.0379 | - |
| 0.0301 | 1   | .   |                             |        |        |        |         |         |   |
| 6577   | NH2 | NH2 | . ARG ARG ARG B B 428 428 . | 0.3970 | 0.4107 | 0.3525 | -0.0394 | -0.0328 | - |
| 0.0010 | 1   | .   |                             |        |        |        |         |         |   |
| 6578   | C   | C   | . ARG ARG ARG B B 428 428 . | 0.4682 | 0.4728 | 0.4637 | -0.0008 | -0.0035 | - |
| 0.0004 | 1   | .   |                             |        |        |        |         |         |   |
| 6579   | O   | O   | . ARG ARG ARG B B 428 428 . | 0.4694 | 0.4543 | 0.4765 | 0.0048  | -0.0116 | - |
| 0.0076 | 1   | .   |                             |        |        |        |         |         |   |
| 6580   | N   | N   | . ASN ASN ASN B B 429 429 . | 0.5089 | 0.4987 | 0.4930 | -0.0047 | 0.0003  | - |
| 0.0031 | 1   | .   |                             |        |        |        |         |         |   |
| 6581   | CA  | CA  | . ASN ASN ASN B B 429 429 . | 0.5187 | 0.5409 | 0.5231 | -0.0032 | 0.0101  | - |
| 0.0040 | 1   | .   |                             |        |        |        |         |         |   |
| 6582   | CB  | CB  | . ASN ASN ASN B B 429 429 . | 0.5467 | 0.5553 | 0.5322 | -0.0011 | 0.0085  | - |
| 0.0056 | 1   | .   |                             |        |        |        |         |         |   |



















|        |   |   |   |     |     |     |   |   |     |     |   |        |        |        |         |         |
|--------|---|---|---|-----|-----|-----|---|---|-----|-----|---|--------|--------|--------|---------|---------|
| 6823   | O | O | . | HOH | HOH | HOH | S | . | 172 | 172 | . | 0.5603 | 0.7857 | 0.8115 | 0.3249  | -0.0166 |
| 0.1248 | 1 | . |   |     |     |     |   |   |     |     |   |        |        |        |         |         |
| 6824   | O | O | . | HOH | HOH | HOH | S | . | 173 | 173 | . | 0.4073 | 0.4007 | 0.2159 | 0.0105  | 0.0195  |
| 0.0716 | 1 | . |   |     |     |     |   |   |     |     |   |        |        |        |         |         |
| 6825   | O | O | . | HOH | HOH | HOH | S | . | 174 | 174 | . | 0.3964 | 0.4209 | 0.3124 | -0.0120 | -0.1106 |
| 0.0863 | 1 | . |   |     |     |     |   |   |     |     |   |        |        |        |         |         |
| 6826   | O | O | . | HOH | HOH | HOH | S | . | 175 | 175 | . | 0.8808 | 1.0711 | 0.5408 | -0.1827 | 0.3241  |
| 0.0186 | 1 | . |   |     |     |     |   |   |     |     |   |        |        |        |         |         |
| 6827   | O | O | . | HOH | HOH | HOH | S | . | 176 | 176 | . | 0.4212 | 0.7396 | 0.6969 | -0.1429 | 0.1293  |
| 0.2375 | 1 | . |   |     |     |     |   |   |     |     |   |        |        |        |         |         |
| 6828   | O | O | . | HOH | HOH | HOH | S | . | 177 | 177 | . | 0.2874 | 0.7507 | 0.7727 | 0.1956  | -0.0810 |
| 0.0418 | 1 | . |   |     |     |     |   |   |     |     |   |        |        |        |         |         |
| 6829   | O | O | . | HOH | HOH | HOH | S | . | 178 | 178 | . | 0.5458 | 0.9311 | 0.7616 | 0.0694  | 0.1941  |
| 0.0287 | 1 | . |   |     |     |     |   |   |     |     |   |        |        |        |         |         |
| 6830   | O | O | . | HOH | HOH | HOH | S | . | 179 | 179 | . | 0.4979 | 0.9722 | 0.7853 | 0.0356  | -0.4235 |
| 0.2834 | 1 | . |   |     |     |     |   |   |     |     |   |        |        |        |         |         |
| 6831   | O | O | . | HOH | HOH | HOH | S | . | 180 | 180 | . | 0.5580 | 0.3852 | 0.5402 | 0.0547  | 0.1451  |
| 0.2437 | 1 | . |   |     |     |     |   |   |     |     |   |        |        |        |         |         |
| 6832   | O | O | . | HOH | HOH | HOH | S | . | 181 | 181 | . | 0.7798 | 0.8154 | 0.5717 | -0.2956 | -0.0209 |
| 0.0430 | 1 | . |   |     |     |     |   |   |     |     |   |        |        |        |         |         |
| 6833   | O | O | . | HOH | HOH | HOH | S | . | 182 | 182 | . | 0.2800 | 0.3535 | 0.4159 | 0.1073  | 0.0733  |
| 0.0598 | 1 | . |   |     |     |     |   |   |     |     |   |        |        |        |         |         |
| 6834   | O | O | . | HOH | HOH | HOH | S | . | 183 | 183 | . | 0.3819 | 0.4896 | 0.4671 | 0.2713  | 0.0254  |
| 0.0766 | 1 | . |   |     |     |     |   |   |     |     |   |        |        |        |         |         |
| 6835   | O | O | . | HOH | HOH | HOH | S | . | 184 | 184 | . | 0.7090 | 0.4124 | 0.5025 | -0.0029 | 0.0143  |
| 0.0453 | 1 | . |   |     |     |     |   |   |     |     |   |        |        |        |         |         |

#

|                                       |          |
|---------------------------------------|----------|
| _atom_sites.entry_id                  | UNNAMED  |
| _atom_sites.fract_transf_matrix[1][1] | 0.009123 |
| _atom_sites.fract_transf_matrix[1][2] | 0.000000 |
| _atom_sites.fract_transf_matrix[1][3] | 0.000000 |
| _atom_sites.fract_transf_matrix[2][1] | 0.000000 |
| _atom_sites.fract_transf_matrix[2][2] | 0.008380 |
| _atom_sites.fract_transf_matrix[2][3] | 0.000000 |
| _atom_sites.fract_transf_matrix[3][1] | 0.000000 |
| _atom_sites.fract_transf_matrix[3][2] | 0.000000 |
| _atom_sites.fract_transf_matrix[3][3] | 0.014642 |
| _atom_sites.fract_transf_vector[1]    | 0.000000 |
| _atom_sites.fract_transf_vector[2]    | 0.000000 |
| _atom_sites.fract_transf_vector[3]    | 0.000000 |

#

|                   |         |
|-------------------|---------|
| _cell.length_a    | 109.608 |
| _cell.length_b    | 119.336 |
| _cell.length_c    | 68.297  |
| _cell.angle_alpha | 90.000  |
| _cell.angle_beta  | 90.000  |
| _cell.angle_gamma | 90.000  |
| _cell.entry_id    | UNNAMED |

#

|                                   |                   |
|-----------------------------------|-------------------|
| _computing.entry_id               | UNNAMED           |
| _computing.structure_refinement   | 'REFMAC 5.5.0109' |
| _computing.structure_solution     | ?                 |
| _computing.pdbx_data_reduction_ds | HKL               |
| _computing.pdbx_data_reduction_ii | HKL               |
| _computing.cell_refinement        | HKL               |

#

|                                  |                            |
|----------------------------------|----------------------------|
| _data_extraction.software        | pdb_extract                |
| _data_extraction.extraction_date | 'Fri Oct 21 12:25:18 2011' |
| _data_extraction.version         | 3.10                       |
| _data_extraction.release_date    | 'June 10, 2010'            |

```

_data_extraction.location          http://sw-tools.rcsb.org/apps/PDB_EXTRACT/
#
loop_
_database_2.database_id
_database_2.database_code
PDB UNNAMED
RCSB UNNAMED
#
_database_PDB_remark.id          3
_database_PDB_remark.text
;
REMARK 3
REMARK 3 REFINEMENT.
REMARK 3 PROGRAM : REFMAC 5.5.0109
REMARK 3 AUTHORS : MURSHUDOV,VAGIN,DODSON
REMARK 3
REMARK 3 REFINEMENT TARGET : MAXIMUM LIKELIHOOD
REMARK 3
REMARK 3 DATA USED IN REFINEMENT.
REMARK 3 RESOLUTION RANGE HIGH (ANGSTROMS) : 2.10
REMARK 3 RESOLUTION RANGE LOW (ANGSTROMS) : 80.72
REMARK 3 DATA CUTOFF (SIGMA(F)) : NONE
REMARK 3 COMPLETENESS FOR RANGE (%) : 89.13
REMARK 3 NUMBER OF REFLECTIONS : 44629
REMARK 3
REMARK 3 FIT TO DATA USED IN REFINEMENT.
REMARK 3 CROSS-VALIDATION METHOD : THROUGHOUT
REMARK 3 FREE R VALUE TEST SET SELECTION : RANDOM
REMARK 3 R VALUE (WORKING + TEST SET) : 0.19202
REMARK 3 R VALUE (WORKING SET) : 0.18901
REMARK 3 FREE R VALUE : 0.24875
REMARK 3 FREE R VALUE TEST SET SIZE (%) : 5.1
REMARK 3 FREE R VALUE TEST SET COUNT : 2380
REMARK 3
REMARK 3 FIT IN THE HIGHEST RESOLUTION BIN.
REMARK 3 TOTAL NUMBER OF BINS USED : 20
REMARK 3 BIN RESOLUTION RANGE HIGH : 2.104
REMARK 3 BIN RESOLUTION RANGE LOW : 2.159
REMARK 3 REFLECTION IN BIN (WORKING SET) : 1517
REMARK 3 BIN COMPLETENESS (WORKING+TEST) (%) : 41.66
REMARK 3 BIN R VALUE (WORKING SET) : 0.197
REMARK 3 BIN FREE R VALUE SET COUNT : 84
REMARK 3 BIN FREE R VALUE : 0.285
REMARK 3
REMARK 3 NUMBER OF NON-HYDROGEN ATOMS USED IN REFINEMENT.
REMARK 3 ALL ATOMS : 6840
REMARK 3
REMARK 3 B VALUES.
REMARK 3 FROM WILSON PLOT (A**2) : NULL
REMARK 3 MEAN B VALUE (OVERALL, A**2) : 35.284
REMARK 3 OVERALL ANISOTROPIC B VALUE.
REMARK 3 B11 (A**2) : 5.95
REMARK 3 B22 (A**2) : -3.77
REMARK 3 B33 (A**2) : -2.18
REMARK 3 B12 (A**2) : 0.00
REMARK 3 B13 (A**2) : 0.00
REMARK 3 B23 (A**2) : 0.00
REMARK 3
REMARK 3 ESTIMATED OVERALL COORDINATE ERROR.
REMARK 3 ESU BASED ON R VALUE (A) : NULL

```

REMARK 3 ESU BASED ON FREE R VALUE (A): 0.217  
REMARK 3 ESU BASED ON MAXIMUM LIKELIHOOD (A): 0.143  
REMARK 3 ESU FOR B VALUES BASED ON MAXIMUM LIKELIHOOD (A\*\*2): 11.869  
REMARK 3  
REMARK 3 CORRELATION COEFFICIENTS.  
REMARK 3 CORRELATION COEFFICIENT FO-FC : 0.950  
REMARK 3 CORRELATION COEFFICIENT FO-FC FREE : 0.921  
REMARK 3  
REMARK 3 RMS DEVIATIONS FROM IDEAL VALUES COUNT RMS WEIGHT  
REMARK 3 BOND LENGTHS REFINED ATOMS (A): 6751 ; 0.022 ; 0.022  
REMARK 3 BOND ANGLES REFINED ATOMS (DEGREES): 9130 ; 1.812 ; 1.970  
REMARK 3 TORSION ANGLES, PERIOD 1 (DEGREES): 861 ; 6.887 ; 5.000  
REMARK 3 TORSION ANGLES, PERIOD 2 (DEGREES): 308 ; 39.656 ; 25.000  
REMARK 3 TORSION ANGLES, PERIOD 3 (DEGREES): 1162 ; 16.385 ; 15.000  
REMARK 3 TORSION ANGLES, PERIOD 4 (DEGREES): 40 ; 21.725 ; 15.000  
REMARK 3 CHIRAL-CENTER RESTRAINTS (A\*\*3): 1025 ; 0.120 ; 0.200  
REMARK 3 GENERAL PLANES REFINED ATOMS (A): 5104 ; 0.008 ; 0.021  
REMARK 3  
REMARK 3 ISOTROPIC THERMAL FACTOR RESTRAINTS. COUNT RMS WEIGHT  
REMARK 3 MAIN-CHAIN BOND REFINED ATOMS (A\*\*2): 4277 ; 1.494 ; 1.500  
REMARK 3 MAIN-CHAIN ANGLE REFINED ATOMS (A\*\*2): 6834 ; 2.468 ; 2.000  
REMARK 3 SIDE-CHAIN BOND REFINED ATOMS (A\*\*2): 2474 ; 4.342 ; 3.000  
REMARK 3 SIDE-CHAIN ANGLE REFINED ATOMS (A\*\*2): 2296 ; 6.554 ; 4.500  
REMARK 3  
REMARK 3 ANISOTROPIC THERMAL FACTOR RESTRAINTS. COUNT RMS WEIGHT  
REMARK 3 RIGID-BOND RESTRAINTS (A\*\*2): 6751 ; 2.464 ; 3.000  
REMARK 3  
REMARK 3 NCS RESTRAINTS STATISTICS  
REMARK 3 NUMBER OF NCS GROUPS : NULL  
REMARK 3  
REMARK 3 TWIN DETAILS  
REMARK 3 NUMBER OF TWIN DOMAINS : NULL  
REMARK 3  
REMARK 3  
REMARK 3 TLS DETAILS  
REMARK 3 NUMBER OF TLS GROUPS : NULL  
REMARK 3  
REMARK 3  
REMARK 3 BULK SOLVENT MODELLING.  
REMARK 3 METHOD USED : MASK  
REMARK 3 PARAMETERS FOR MASK CALCULATION  
REMARK 3 VDW PROBE RADIUS : 1.40  
REMARK 3 ION PROBE RADIUS : 0.80  
REMARK 3 SHRINKAGE RADIUS : 0.80  
REMARK 3  
REMARK 3 OTHER REFINEMENT REMARKS:  
REMARK 3 HYDROGENS HAVE BEEN ADDED IN THE RIDING POSITIONS  
REMARK 3 U VALUES : REFINED INDIVIDUALLY  
REMARK 3

;  
#  
\_entity\_poly.entity\_id 1  
\_entity\_poly.pdbx\_seq\_one\_letter\_code  
;SIQKIWAREILDSRGNPTVEVDLYTAKGLFRAAVPSGASTGIYEALERDGDQRYLGKG  
VLKAVDHINSTIAPALISSGLSVVEQEKLNLMLDGTENKSKFGANAILGVSLAVCKA  
GAAERELPLYRHIAQLAGNSDLILPVPFNVINGGSHAGNKLAMQEFMILPVGAESFRDA  
MRLGAEVYHTLKGVIKDKYGKDATNVGDEGGFAPNILENSEALELVKEAIDKAGYTEKIV  
IGMDVAASEFYRDGKYDLDFKSPTDPSRYITGDQLGALYQDFVRDYPVVSIEDPFDQDDW  
AAWSKFTANVGIQIVGDDLTVTNPKRIERAVEEKACNCLLLKVNQIGSVTEAIQACKLAQ  
ENGWGVMVSHRSGETEDTFIADLVVGLCTGQIKTGAPCRSERLAKYNQLMRIEELGDEA

RFAGHNFRNPSVL

```
;  
_entity_poly.pdbx_strand_id      A,B  
_entity_poly.type                 'polypeptide(L)'  
_entity_poly.pdbx_target_identifier ?  
#  
_entry.id      UNNAMED  
#  
_exptl.crystals_number      1  
_exptl.entry_id      UNNAMED  
_exptl.method      'X-RAY DIFFRACTION'  
#  
_exptl_crystal.id      1  
_exptl_crystal.pdbx_mosaicity      0.786  
_exptl_crystal.pdbx_mosaicity_esd  ?  
_exptl_crystal.density_Matthews    ?  
_exptl_crystal.density_diffn       ?  
_exptl_crystal.density_meas        ?  
_exptl_crystal.density_meas_temp   ?  
_exptl_crystal.density_percent_sol ?  
_exptl_crystal.size_max            ?  
_exptl_crystal.size_mid            ?  
_exptl_crystal.size_min            ?  
_exptl_crystal.size_rad            ?  
#  
_refine.entry_id      UNNAMED  
_refine.pdbx_refine_id      'X-RAY DIFFRACTION'  
_refine.ls_d_res_high      2.1000  
_refine.ls_d_res_low      80.7200  
_refine.pdbx_ls_sigma_F      0.000  
_refine.pdbx_data_cutoff_high_absF ?  
_refine.pdbx_data_cutoff_low_absF ?  
_refine.ls_percent_reflms_obs    89.1300  
_refine.ls_number_reflms_obs     47009  
_refine.ls_number_reflms_all     ?  
_refine.pdbx_ls_cross_valid_method THROUGHOUT  
_refine.ls_matrix_type         ?  
_refine.pdbx_R_Free_selection_details RANDOM  
_refine.details  
' HYDROGENS HAVE BEEN ADDED IN THE RIDING POSITIONS U VALUES      : REFINED  
INDIVIDUALLY '  
_refine.ls_R_factor_all      ?  
_refine.ls_R_factor_obs      0.1920  
_refine.ls_R_factor_R_work   0.1890  
_refine.ls_wR_factor_R_work  0.1882  
_refine.ls_R_factor_R_free   0.2488  
_refine.ls_wR_factor_R_free  0.2457  
_refine.ls_percent_reflms_R_free 5.1000  
_refine.ls_number_reflms_R_free 2380  
_refine.ls_number_reflms_R_work 44629  
_refine.ls_R_factor_R_free_error ?  
_refine.B_iso_mean          35.2563  
_refine.solvent_model_param_bsol ?  
_refine.solvent_model_param_ksol ?  
_refine.pdbx_isotropic_thermal_model ?  
_refine.aniso_B[1][1]      5.9500  
_refine.aniso_B[2][2]      -3.7700  
_refine.aniso_B[3][3]      -2.1800  
_refine.aniso_B[1][2]      0.0000  
_refine.aniso_B[1][3]      0.0000
```

|                                                 |                        |
|-------------------------------------------------|------------------------|
| _refine.aniso_B[2][3]                           | 0.0000                 |
| _refine.correlation_coeff_Fo_to_Fc              | 0.9500                 |
| _refine.correlation_coeff_Fo_to_Fc_free         | 0.9210                 |
| _refine.overall_SU_R_Cruickshank_DPI            | ?                      |
| _refine.pdbx_overall_SU_R_free_Cruickshank_DPI  | ?                      |
| _refine.pdbx_overall_SU_R_Blow_DPI              | ?                      |
| _refine.pdbx_overall_SU_R_free_Blow_DPI         | ?                      |
| _refine.overall_SU_R_free                       | 0.2166                 |
| _refine.pdbx_overall_ESU_R                      | ?                      |
| _refine.pdbx_overall_ESU_R_Free                 | 0.2170                 |
| _refine.overall_SU_ML                           | 0.1430                 |
| _refine.overall_SU_B                            | 11.8690                |
| _refine.solvent_model_details                   | MASK                   |
| _refine.pdbx_solvent_vdw_probe_radii            | 1.4000                 |
| _refine.pdbx_solvent_ion_probe_radii            | 0.8000                 |
| _refine.pdbx_solvent_shrinkage_radii            | 0.8000                 |
| _refine.ls_number_parameters                    | ?                      |
| _refine.ls_number_restraints                    | ?                      |
| _refine.pdbx_starting_model                     | ?                      |
| _refine.pdbx_method_to_determine_struct         | ?                      |
| _refine.pdbx_stereochemistry_target_values      | 'MAXIMUM LIKELIHOOD'   |
| _refine.pdbx_stereochem_target_val_spec_case    | ?                      |
| _refine.overall_FOM_work_R_set                  | 0.8220                 |
| _refine.B_iso_max                               | 265.390                |
| _refine.B_iso_min                               | 5.450                  |
| _refine.pdbx_overall_phase_error                | ?                      |
| _refine.occupancy_max                           | 1.000                  |
| _refine.occupancy_min                           | 0.690                  |
| #                                               |                        |
| loop_                                           |                        |
| _refine_ls_restr.pdbx_refine_id                 |                        |
| _refine_ls_restr.type                           |                        |
| _refine_ls_restr.number                         |                        |
| _refine_ls_restr.dev_ideal                      |                        |
| _refine_ls_restr.dev_ideal_target               |                        |
| _refine_ls_restr.weight                         |                        |
| _refine_ls_restr.pdbx_restraint_function        |                        |
| 'X-RAY DIFFRACTION' r_bond_refined_d            | 6751 0.022 0.022 ? ?   |
| 'X-RAY DIFFRACTION' r_angle_refined_deg         | 9130 1.812 1.970 ? ?   |
| 'X-RAY DIFFRACTION' r_dihedral_angle_1_deg      | 861 6.887 5.000 ? ?    |
| 'X-RAY DIFFRACTION' r_dihedral_angle_2_deg      | 308 39.656 25.000 ? ?  |
| 'X-RAY DIFFRACTION' r_dihedral_angle_3_deg      | 1162 16.385 15.000 ? ? |
| 'X-RAY DIFFRACTION' r_dihedral_angle_4_deg      | 40 21.725 15.000 ? ?   |
| 'X-RAY DIFFRACTION' r_chiral_restr              | 1025 0.120 0.200 ? ?   |
| 'X-RAY DIFFRACTION' r_gen_planes_refined        | 5104 0.008 0.021 ? ?   |
| 'X-RAY DIFFRACTION' r_mcbond_it                 | 4277 1.494 1.500 ? ?   |
| 'X-RAY DIFFRACTION' r_mcbond_angle_it           | 6834 2.468 2.000 ? ?   |
| 'X-RAY DIFFRACTION' r_scbond_it                 | 2474 4.342 3.000 ? ?   |
| 'X-RAY DIFFRACTION' r_scbond_angle_it           | 2296 6.554 4.500 ? ?   |
| 'X-RAY DIFFRACTION' r_rigid_bond_restr          | 6751 2.464 3.000 ? ?   |
| #                                               |                        |
| _refine_ls_shell.d_res_high                     | 2.1040                 |
| _refine_ls_shell.d_res_low                      | 2.1590                 |
| _refine_ls_shell.pdbx_total_number_of_bins_used | 20                     |
| _refine_ls_shell.percent_reflns_obs             | 41.6600                |
| _refine_ls_shell.number_reflns_R_work           | 1517                   |
| _refine_ls_shell.R_factor_all                   | ?                      |
| _refine_ls_shell.R_factor_R_work                | 0.1970                 |
| _refine_ls_shell.R_factor_R_free                | 0.2850                 |
| _refine_ls_shell.percent_reflns_R_free          | ?                      |

```

_refine_ls_shell.number_reflms_R_free      84
_refine_ls_shell.R_factor_R_free_error    ?
_refine_ls_shell.number_reflms_all        1601
_refine_ls_shell.number_reflms_obs        ?
_refine_ls_shell.pdbx_refine_id           'X-RAY DIFFRACTION'
#

```

```

_reflms.entry_id          UNNAMED
_reflms.d_resolution_high 2.100
_reflms.d_resolution_low  50.000
_reflms.pdbx_number_measured_all 202803
_reflms.number_obs        47176
_reflms.pdbx_Rmerge_I_obs 0.058
_reflms.pdbx_netI_over_av_sigmaI 30.231
_reflms.pdbx_netI_over_sigmaI 17.000
_reflms.pdbx_chi_squared  1.843
_reflms.pdbx_redundancy   4.300
_reflms.percent_possible_obs 89.800
_reflms.pdbx_Rmeas_mean   0.058
_reflms.pdbx_average_I_obs 9377.700
_reflms.pdbx_average_sigmaI_obs 310.200
#

```

```

loop_
_reflms_shell.d_res_high
_reflms_shell.d_res_low
_reflms_shell.number_measured_obs
_reflms_shell.number_measured_all
_reflms_shell.number_unique_obs
_reflms_shell.pdbx_rejects
_reflms_shell.Rmerge_I_obs
_reflms_shell.meanI_over_sigI_obs
_reflms_shell.pdbx_Rsym_value
_reflms_shell.pdbx_chi_squared
_reflms_shell.pdbx_redundancy
_reflms_shell.percent_possible_obs
_reflms_shell.pdbx_Rmeas_mean
_reflms_shell.pdbx_netI_over_sigmaI_obs
_reflms_shell.pdbx_number_centric
_reflms_shell.pdbx_number_anomalous
_reflms_shell.pdbx_Rmerge_I_anomalous
_reflms_shell.pdbx_meanI_over_sigI_anomalous
_reflms_shell.pdbx_PCV_mean
_reflms_shell.number_possible
_reflms_shell.number_unique_all
_reflms_shell.Rmerge_F_all
_reflms_shell.Rmerge_F_obs
_reflms_shell.Rmerge_I_all
_reflms_shell.meanI_over_sigI_all
_reflms_shell.percent_possible_all
_reflms_shell.pdbx_Rrim_I_all
_reflms_shell.pdbx_Rpim_I_all

```

```

2.100 2.180 ? ? ? ? 0.161 ? ? 0.978 2.400 ? ? ? ? ? ? ? ? ? ? 2441 ? ? ? ? 47.300 ? ?
2.180 2.260 ? ? ? ? 0.143 ? ? 1.153 2.600 ? ? ? ? ? ? ? ? ? ? 3478 ? ? ? ? 67.300 ? ?
2.260 2.370 ? ? ? ? 0.146 ? ? 1.192 3.000 ? ? ? ? ? ? ? ? ? ? 4610 ? ? ? ? 88.600 ? ?
2.370 2.490 ? ? ? ? 0.151 ? ? 1.201 4.400 ? ? ? ? ? ? ? ? ? ? 5162 ? ? ? ? 99.400 ? ?
2.490 2.650 ? ? ? ? 0.126 ? ? 1.319 4.800 ? ? ? ? ? ? ? ? ? ? 5190 ? ? ? ? 99.900 ? ?
2.650 2.850 ? ? ? ? 0.099 ? ? 1.489 4.900 ? ? ? ? ? ? ? ? ? ? 5217 ? ? ? ? 99.800 ? ?
2.850 3.140 ? ? ? ? 0.076 ? ? 1.758 4.900 ? ? ? ? ? ? ? ? ? ? 5227 ? ? ? ? 99.800 ? ?
3.140 3.590 ? ? ? ? 0.057 ? ? 2.098 4.900 ? ? ? ? ? ? ? ? ? ? 5248 ? ? ? ? 99.500 ? ?
3.590 4.520 ? ? ? ? 0.044 ? ? 2.643 4.700 ? ? ? ? ? ? ? ? ? ? 5244 ? ? ? ? 98.900 ? ?
4.520 50.000 ? ? ? ? 0.042 ? ? 3.015 4.600 ? ? ? ? ? ? ? ? ? ? 5359 ? ? ? ? 96.500 ? ?

```

```

#
loop_
_software.pdbx_ordinal
_software.name
_software.version
_software.date
_software.type
_software.contact_author
_software.contact_author_email
_software.classification
_software.location
_software.language
1 HKL      ?      ?      package 'Zbyszek Otwinowski' hkl@hkl-xray.com
'data reduction' http://www.hkl-xray.com/      ?
2 REFMAC5  ?      ?      program 'Garib N. Murshudov' garib@ysbl.york.ac.uk
refinement      http://www.ccp4.ac.uk/dist/html/refmac5.html Fortran_77
3 pdb_extract 3.10 'June 10, 2010' package PDB
deposit@deposit.rcsb.org
'data extraction' http://sw-tools.pdb.org/apps/PDB_EXTRACT/      C++
#
_struct_biol.id      1
_struct_biol.details ?
#
_symmetry.space_group_name_H-M 'P 21 21 2'
_symmetry.entry_id    UNNAMED
_symmetry.Int_Tables_number 18
#

```



## CIF File(s) (REQUIRED if paper describes X-ray crystal structures)

data\_UNNAMED

#

loop\_

\_atom\_site.group\_PDB

\_atom\_site.id

\_atom\_site.auth\_atom\_id

\_atom\_site.label\_atom\_id

\_atom\_site.label\_alt\_id

\_atom\_site.auth\_comp\_id

\_atom\_site.label\_comp\_id

\_atom\_site.pdbx\_auth\_comp\_id

\_atom\_site.auth\_asym\_id

\_atom\_site.label\_asym\_id

\_atom\_site.auth\_seq\_id

\_atom\_site.label\_seq\_id

\_atom\_site.pdbx\_PDB\_ins\_code

\_atom\_site.Cartn\_x

\_atom\_site.Cartn\_y

\_atom\_site.Cartn\_z

\_atom\_site.occupancy

\_atom\_site.B\_iso\_or\_equiv

\_atom\_site.pdbx\_PDB\_model\_num

\_atom\_site.label\_entity\_id

\_atom\_site.type\_symbol

|        |   |   |   |     |     |     |   |   |   |   |   |        |        |        |      |       |
|--------|---|---|---|-----|-----|-----|---|---|---|---|---|--------|--------|--------|------|-------|
| ATOM 1 | N | N | . | SER | SER | SER | A | A | 1 | 1 | . | 65.922 | 77.069 | 21.744 | 1.00 | 17.83 |
|--------|---|---|---|-----|-----|-----|---|---|---|---|---|--------|--------|--------|------|-------|

1 . .

|        |    |    |   |     |     |     |   |   |   |   |   |        |        |        |      |       |
|--------|----|----|---|-----|-----|-----|---|---|---|---|---|--------|--------|--------|------|-------|
| ATOM 2 | CA | CA | . | SER | SER | SER | A | A | 1 | 1 | . | 67.295 | 76.500 | 21.316 | 1.00 | 18.18 |
|--------|----|----|---|-----|-----|-----|---|---|---|---|---|--------|--------|--------|------|-------|

1 . .

|        |    |    |   |     |     |     |   |   |   |   |   |        |        |        |      |       |
|--------|----|----|---|-----|-----|-----|---|---|---|---|---|--------|--------|--------|------|-------|
| ATOM 3 | CB | CB | . | SER | SER | SER | A | A | 1 | 1 | . | 67.252 | 74.978 | 21.025 | 1.00 | 19.26 |
|--------|----|----|---|-----|-----|-----|---|---|---|---|---|--------|--------|--------|------|-------|

1 . .

|        |    |    |   |     |     |     |   |   |   |   |   |        |        |        |      |       |
|--------|----|----|---|-----|-----|-----|---|---|---|---|---|--------|--------|--------|------|-------|
| ATOM 4 | OG | OG | . | SER | SER | SER | A | A | 1 | 1 | . | 66.292 | 74.679 | 20.001 | 1.00 | 26.51 |
|--------|----|----|---|-----|-----|-----|---|---|---|---|---|--------|--------|--------|------|-------|

1 . .

|        |   |   |   |     |     |     |   |   |   |   |   |        |        |        |      |       |
|--------|---|---|---|-----|-----|-----|---|---|---|---|---|--------|--------|--------|------|-------|
| ATOM 5 | C | C | . | SER | SER | SER | A | A | 1 | 1 | . | 67.816 | 77.196 | 20.056 | 1.00 | 16.96 |
|--------|---|---|---|-----|-----|-----|---|---|---|---|---|--------|--------|--------|------|-------|

1 . .

|        |   |   |   |     |     |     |   |   |   |   |   |        |        |        |      |       |
|--------|---|---|---|-----|-----|-----|---|---|---|---|---|--------|--------|--------|------|-------|
| ATOM 6 | O | O | . | SER | SER | SER | A | A | 1 | 1 | . | 67.099 | 77.950 | 19.391 | 1.00 | 17.53 |
|--------|---|---|---|-----|-----|-----|---|---|---|---|---|--------|--------|--------|------|-------|

1 . .

|        |   |   |   |     |     |     |   |   |   |   |   |        |        |        |      |       |
|--------|---|---|---|-----|-----|-----|---|---|---|---|---|--------|--------|--------|------|-------|
| ATOM 7 | N | N | . | ILE | ILE | ILE | A | A | 2 | 2 | . | 69.074 | 76.932 | 19.737 | 1.00 | 14.62 |
|--------|---|---|---|-----|-----|-----|---|---|---|---|---|--------|--------|--------|------|-------|

1 . .

|        |    |    |   |     |     |     |   |   |   |   |   |        |        |        |      |       |
|--------|----|----|---|-----|-----|-----|---|---|---|---|---|--------|--------|--------|------|-------|
| ATOM 8 | CA | CA | . | ILE | ILE | ILE | A | A | 2 | 2 | . | 69.673 | 77.543 | 18.561 | 1.00 | 12.85 |
|--------|----|----|---|-----|-----|-----|---|---|---|---|---|--------|--------|--------|------|-------|

1 . .

|        |    |    |   |     |     |     |   |   |   |   |   |        |        |        |      |       |
|--------|----|----|---|-----|-----|-----|---|---|---|---|---|--------|--------|--------|------|-------|
| ATOM 9 | CB | CB | . | ILE | ILE | ILE | A | A | 2 | 2 | . | 71.174 | 77.318 | 18.623 | 1.00 | 11.42 |
|--------|----|----|---|-----|-----|-----|---|---|---|---|---|--------|--------|--------|------|-------|

1 . .

|         |     |     |   |     |     |     |   |   |   |   |   |        |        |        |      |       |
|---------|-----|-----|---|-----|-----|-----|---|---|---|---|---|--------|--------|--------|------|-------|
| ATOM 10 | CG1 | CG1 | . | ILE | ILE | ILE | A | A | 2 | 2 | . | 71.724 | 78.055 | 19.822 | 1.00 | 11.23 |
|---------|-----|-----|---|-----|-----|-----|---|---|---|---|---|--------|--------|--------|------|-------|

1 . .

|         |     |     |   |     |     |     |   |   |   |   |   |        |        |        |      |       |
|---------|-----|-----|---|-----|-----|-----|---|---|---|---|---|--------|--------|--------|------|-------|
| ATOM 11 | CD1 | CD1 | . | ILE | ILE | ILE | A | A | 2 | 2 | . | 73.161 | 77.633 | 20.153 | 1.00 | 11.51 |
|---------|-----|-----|---|-----|-----|-----|---|---|---|---|---|--------|--------|--------|------|-------|

1 . .

|         |     |     |   |     |     |     |   |   |   |   |   |        |        |        |      |       |
|---------|-----|-----|---|-----|-----|-----|---|---|---|---|---|--------|--------|--------|------|-------|
| ATOM 12 | CG2 | CG2 | . | ILE | ILE | ILE | A | A | 2 | 2 | . | 71.783 | 77.838 | 17.339 | 1.00 | 12.06 |
|---------|-----|-----|---|-----|-----|-----|---|---|---|---|---|--------|--------|--------|------|-------|

1 . .

|         |   |   |   |     |     |     |   |   |   |   |   |        |        |        |      |       |
|---------|---|---|---|-----|-----|-----|---|---|---|---|---|--------|--------|--------|------|-------|
| ATOM 13 | C | C | . | ILE | ILE | ILE | A | A | 2 | 2 | . | 69.080 | 76.939 | 17.303 | 1.00 | 14.70 |
|---------|---|---|---|-----|-----|-----|---|---|---|---|---|--------|--------|--------|------|-------|

1 . .

|         |   |   |   |     |     |     |   |   |   |   |   |        |        |        |      |       |
|---------|---|---|---|-----|-----|-----|---|---|---|---|---|--------|--------|--------|------|-------|
| ATOM 14 | O | O | . | ILE | ILE | ILE | A | A | 2 | 2 | . | 68.993 | 75.659 | 17.173 | 1.00 | 14.31 |
|---------|---|---|---|-----|-----|-----|---|---|---|---|---|--------|--------|--------|------|-------|

1 . .

|         |   |   |   |     |     |     |   |   |   |   |   |        |        |        |      |       |
|---------|---|---|---|-----|-----|-----|---|---|---|---|---|--------|--------|--------|------|-------|
| ATOM 15 | N | N | . | GLN | GLN | GLN | A | A | 3 | 3 | . | 68.628 | 77.789 | 16.383 | 1.00 | 14.97 |
|---------|---|---|---|-----|-----|-----|---|---|---|---|---|--------|--------|--------|------|-------|

1 . .

|         |    |    |   |     |     |     |   |   |   |   |   |        |        |        |      |       |
|---------|----|----|---|-----|-----|-----|---|---|---|---|---|--------|--------|--------|------|-------|
| ATOM 16 | CA | CA | . | GLN | GLN | GLN | A | A | 3 | 3 | . | 68.107 | 77.275 | 15.092 | 1.00 | 17.20 |
|---------|----|----|---|-----|-----|-----|---|---|---|---|---|--------|--------|--------|------|-------|

1 . .

|         |    |    |   |     |     |     |   |   |   |   |   |        |        |        |      |       |
|---------|----|----|---|-----|-----|-----|---|---|---|---|---|--------|--------|--------|------|-------|
| ATOM 17 | CB | CB | . | GLN | GLN | GLN | A | A | 3 | 3 | . | 66.956 | 78.144 | 14.564 | 1.00 | 18.26 |
|---------|----|----|---|-----|-----|-----|---|---|---|---|---|--------|--------|--------|------|-------|

1 . .

|         |    |    |   |     |     |     |   |   |   |   |   |        |        |        |      |       |
|---------|----|----|---|-----|-----|-----|---|---|---|---|---|--------|--------|--------|------|-------|
| ATOM 18 | CG | CG | . | GLN | GLN | GLN | A | A | 3 | 3 | . | 65.778 | 78.259 | 15.482 | 1.00 | 22.37 |
|---------|----|----|---|-----|-----|-----|---|---|---|---|---|--------|--------|--------|------|-------|

1 . .























|          |     |     |                         |                                    |
|----------|-----|-----|-------------------------|------------------------------------|
| ATOM 319 | CG  | CG  | . TYR TYR TYR A A 43 43 | . 101.938 82.948 28.644 1.00 11.40 |
| 1 . .    |     |     |                         |                                    |
| ATOM 320 | CD1 | CD1 | . TYR TYR TYR A A 43 43 | . 102.832 83.969 29.041 1.00 10.66 |
| 1 . .    |     |     |                         |                                    |
| ATOM 321 | CE1 | CE1 | . TYR TYR TYR A A 43 43 | . 104.169 83.639 29.475 1.00 14.28 |
| 1 . .    |     |     |                         |                                    |
| ATOM 322 | CZ  | CZ  | . TYR TYR TYR A A 43 43 | . 104.560 82.288 29.427 1.00 15.54 |
| 1 . .    |     |     |                         |                                    |
| ATOM 323 | OH  | OH  | . TYR TYR TYR A A 43 43 | . 105.817 81.960 29.802 1.00 18.16 |
| 1 . .    |     |     |                         |                                    |
| ATOM 324 | CE2 | CE2 | . TYR TYR TYR A A 43 43 | . 103.709 81.295 29.013 1.00 15.20 |
| 1 . .    |     |     |                         |                                    |
| ATOM 325 | CD2 | CD2 | . TYR TYR TYR A A 43 43 | . 102.391 81.629 28.624 1.00 13.19 |
| 1 . .    |     |     |                         |                                    |
| ATOM 326 | C   | C   | . TYR TYR TYR A A 43 43 | . 98.895 83.234 26.237 1.00 9.00   |
| 1 . .    |     |     |                         |                                    |
| ATOM 327 | O   | O   | . TYR TYR TYR A A 43 43 | . 97.996 82.559 26.796 1.00 11.37  |
| 1 . .    |     |     |                         |                                    |
| ATOM 328 | N   | N   | . GLU GLU GLU A A 44 44 | . 98.624 84.088 25.242 1.00 8.09   |
| 1 . .    |     |     |                         |                                    |
| ATOM 329 | CA  | CA  | . GLU GLU GLU A A 44 44 | . 97.177 84.200 24.821 1.00 8.15   |
| 1 . .    |     |     |                         |                                    |
| ATOM 330 | CB  | CB  | . GLU GLU GLU A A 44 44 | . 97.046 85.309 23.793 1.00 8.97   |
| 1 . .    |     |     |                         |                                    |
| ATOM 331 | CG  | CG  | . GLU GLU GLU A A 44 44 | . 97.389 86.630 24.392 1.00 8.35   |
| 1 . .    |     |     |                         |                                    |
| ATOM 332 | CD  | CD  | . GLU GLU GLU A A 44 44 | . 96.971 87.843 23.507 1.00 8.56   |
| 1 . .    |     |     |                         |                                    |
| ATOM 333 | OE1 | OE1 | . GLU GLU GLU A A 44 44 | . 96.140 87.659 22.564 1.00 10.84  |
| 1 . .    |     |     |                         |                                    |
| ATOM 334 | OE2 | OE2 | . GLU GLU GLU A A 44 44 | . 97.470 88.946 23.819 1.00 10.45  |
| 1 . .    |     |     |                         |                                    |
| ATOM 335 | C   | C   | . GLU GLU GLU A A 44 44 | . 96.710 82.869 24.160 1.00 8.17   |
| 1 . .    |     |     |                         |                                    |
| ATOM 336 | O   | O   | . GLU GLU GLU A A 44 44 | . 97.534 82.079 23.613 1.00 10.14  |
| 1 . .    |     |     |                         |                                    |
| ATOM 337 | N   | N   | . ALA ALA ALA A A 45 45 | . 95.418 82.614 24.258 1.00 8.90   |
| 1 . .    |     |     |                         |                                    |
| ATOM 338 | CA  | CA  | . ALA ALA ALA A A 45 45 | . 94.799 81.486 23.592 1.00 8.64   |
| 1 . .    |     |     |                         |                                    |
| ATOM 339 | CB  | CB  | . ALA ALA ALA A A 45 45 | . 93.309 81.407 23.938 1.00 7.41   |
| 1 . .    |     |     |                         |                                    |
| ATOM 340 | C   | C   | . ALA ALA ALA A A 45 45 | . 95.051 81.607 22.073 1.00 9.51   |
| 1 . .    |     |     |                         |                                    |
| ATOM 341 | O   | O   | . ALA ALA ALA A A 45 45 | . 95.231 82.688 21.520 1.00 9.33   |
| 1 . .    |     |     |                         |                                    |
| ATOM 342 | N   | N   | . LEU LEU LEU A A 46 46 | . 95.074 80.463 21.407 1.00 9.61   |
| 1 . .    |     |     |                         |                                    |
| ATOM 343 | CA  | CA  | . LEU LEU LEU A A 46 46 | . 95.401 80.386 19.988 1.00 10.14  |
| 1 . .    |     |     |                         |                                    |
| ATOM 344 | CB  | CB  | . LEU LEU LEU A A 46 46 | . 95.573 78.875 19.564 1.00 11.08  |
| 1 . .    |     |     |                         |                                    |
| ATOM 345 | CG  | CG  | . LEU LEU LEU A A 46 46 | . 96.292 78.554 18.213 1.00 17.98  |
| 1 . .    |     |     |                         |                                    |
| ATOM 346 | CD1 | CD1 | . LEU LEU LEU A A 46 46 | . 95.493 77.866 17.199 1.00 16.80  |
| 1 . .    |     |     |                         |                                    |
| ATOM 347 | CD2 | CD2 | . LEU LEU LEU A A 46 46 | . 97.291 79.517 17.720 1.00 19.05  |
| 1 . .    |     |     |                         |                                    |
| ATOM 348 | C   | C   | . LEU LEU LEU A A 46 46 | . 94.461 81.170 19.044 1.00 9.69   |
| 1 . .    |     |     |                         |                                    |













|          |     |     |                                                           |
|----------|-----|-----|-----------------------------------------------------------|
| ATOM 499 | OD2 | OD2 | . ASP ASP ASP A A 66 66 . 86.131 73.019 8.540 1.00 32.30  |
| 1 . .    |     |     |                                                           |
| ATOM 500 | C   | C   | . ASP ASP ASP A A 66 66 . 84.463 75.276 10.243 1.00 8.67  |
| 1 . .    |     |     |                                                           |
| ATOM 501 | O   | O   | . ASP ASP ASP A A 66 66 . 83.512 74.487 10.372 1.00 8.53  |
| 1 . .    |     |     |                                                           |
| ATOM 502 | N   | N   | . HIS HIS HIS A A 67 67 . 85.393 75.435 11.191 1.00 9.43  |
| 1 . .    |     |     |                                                           |
| ATOM 503 | CA  | CA  | . HIS HIS HIS A A 67 67 . 85.182 74.747 12.517 1.00 8.73  |
| 1 . .    |     |     |                                                           |
| ATOM 504 | CB  | CB  | . HIS HIS HIS A A 67 67 . 86.305 75.039 13.528 1.00 9.31  |
| 1 . .    |     |     |                                                           |
| ATOM 505 | CG  | CG  | . HIS HIS HIS A A 67 67 . 87.604 74.406 13.163 1.00 10.80 |
| 1 . .    |     |     |                                                           |
| ATOM 506 | ND1 | ND1 | . HIS HIS HIS A A 67 67 . 87.711 73.042 12.916 1.00 13.15 |
| 1 . .    |     |     |                                                           |
| ATOM 507 | CE1 | CE1 | . HIS HIS HIS A A 67 67 . 88.981 72.743 12.674 1.00 15.50 |
| 1 . .    |     |     |                                                           |
| ATOM 508 | NE2 | NE2 | . HIS HIS HIS A A 67 67 . 89.694 73.860 12.739 1.00 12.25 |
| 1 . .    |     |     |                                                           |
| ATOM 509 | CD2 | CD2 | . HIS HIS HIS A A 67 67 . 88.860 74.907 13.107 1.00 11.55 |
| 1 . .    |     |     |                                                           |
| ATOM 510 | C   | C   | . HIS HIS HIS A A 67 67 . 83.845 75.187 13.126 1.00 8.29  |
| 1 . .    |     |     |                                                           |
| ATOM 511 | O   | O   | . HIS HIS HIS A A 67 67 . 83.087 74.389 13.670 1.00 8.64  |
| 1 . .    |     |     |                                                           |
| ATOM 512 | N   | N   | . ILE ILE ILE A A 68 68 . 83.534 76.484 13.015 1.00 8.21  |
| 1 . .    |     |     |                                                           |
| ATOM 513 | CA  | CA  | . ILE ILE ILE A A 68 68 . 82.216 76.945 13.450 1.00 7.38  |
| 1 . .    |     |     |                                                           |
| ATOM 514 | CB  | CB  | . ILE ILE ILE A A 68 68 . 82.106 78.528 13.441 1.00 7.19  |
| 1 . .    |     |     |                                                           |
| ATOM 515 | CG1 | CG1 | . ILE ILE ILE A A 68 68 . 83.066 79.118 14.494 1.00 6.26  |
| 1 . .    |     |     |                                                           |
| ATOM 516 | CD1 | CD1 | . ILE ILE ILE A A 68 68 . 83.375 80.608 14.103 1.00 7.74  |
| 1 . .    |     |     |                                                           |
| ATOM 517 | CG2 | CG2 | . ILE ILE ILE A A 68 68 . 80.654 78.975 13.754 1.00 5.77  |
| 1 . .    |     |     |                                                           |
| ATOM 518 | C   | C   | . ILE ILE ILE A A 68 68 . 81.069 76.324 12.650 1.00 8.38  |
| 1 . .    |     |     |                                                           |
| ATOM 519 | O   | O   | . ILE ILE ILE A A 68 68 . 80.096 75.762 13.232 1.00 8.39  |
| 1 . .    |     |     |                                                           |
| ATOM 520 | N   | N   | . ASN ASN ASN A A 69 69 . 81.117 76.436 11.328 1.00 8.12  |
| 1 . .    |     |     |                                                           |
| ATOM 521 | CA  | CA  | . ASN ASN ASN A A 69 69 . 79.961 76.048 10.547 1.00 7.49  |
| 1 . .    |     |     |                                                           |
| ATOM 522 | CB  | CB  | . ASN ASN ASN A A 69 69 . 80.140 76.581 9.142 1.00 7.81   |
| 1 . .    |     |     |                                                           |
| ATOM 523 | CG  | CG  | . ASN ASN ASN A A 69 69 . 79.980 78.112 9.116 1.00 9.03   |
| 1 . .    |     |     |                                                           |
| ATOM 524 | OD1 | OD1 | . ASN ASN ASN A A 69 69 . 79.261 78.650 9.925 1.00 11.10  |
| 1 . .    |     |     |                                                           |
| ATOM 525 | ND2 | ND2 | . ASN ASN ASN A A 69 69 . 80.522 78.748 8.105 1.00 10.89  |
| 1 . .    |     |     |                                                           |
| ATOM 526 | C   | C   | . ASN ASN ASN A A 69 69 . 79.673 74.569 10.505 1.00 9.13  |
| 1 . .    |     |     |                                                           |
| ATOM 527 | O   | O   | . ASN ASN ASN A A 69 69 . 78.497 74.187 10.490 1.00 9.26  |
| 1 . .    |     |     |                                                           |
| ATOM 528 | N   | N   | . SER SER SER A A 70 70 . 80.722 73.762 10.541 1.00 9.46  |
| 1 . .    |     |     |                                                           |



































|           |     |     |                                                             |
|-----------|-----|-----|-------------------------------------------------------------|
| ATOM 979  | NH2 | NH2 | . ARG ARG ARG A A 131 131 . 69.797 97.692 36.153 1.00 36.01 |
| 1 . .     |     |     |                                                             |
| ATOM 980  | C   | C   | . ARG ARG ARG A A 131 131 . 71.839 92.091 31.991 1.00 9.73  |
| 1 . .     |     |     |                                                             |
| ATOM 981  | O   | O   | . ARG ARG ARG A A 131 131 . 71.998 91.517 33.084 1.00 9.66  |
| 1 . .     |     |     |                                                             |
| ATOM 982  | N   | N   | . HIS HIS HIS A A 132 132 . 71.861 91.452 30.826 1.00 8.42  |
| 1 . .     |     |     |                                                             |
| ATOM 983  | CA  | CA  | . HIS HIS HIS A A 132 132 . 72.054 90.022 30.783 1.00 7.53  |
| 1 . .     |     |     |                                                             |
| ATOM 984  | CB  | CB  | . HIS HIS HIS A A 132 132 . 71.844 89.564 29.367 1.00 9.55  |
| 1 . .     |     |     |                                                             |
| ATOM 985  | CG  | CG  | . HIS HIS HIS A A 132 132 . 72.087 88.104 29.150 1.00 10.45 |
| 1 . .     |     |     |                                                             |
| ATOM 986  | ND1 | ND1 | . HIS HIS HIS A A 132 132 . 71.482 87.130 29.905 1.00 12.33 |
| 1 . .     |     |     |                                                             |
| ATOM 987  | CE1 | CE1 | . HIS HIS HIS A A 132 132 . 71.840 85.934 29.435 1.00 15.55 |
| 1 . .     |     |     |                                                             |
| ATOM 988  | NE2 | NE2 | . HIS HIS HIS A A 132 132 . 72.642 86.100 28.391 1.00 12.98 |
| 1 . .     |     |     |                                                             |
| ATOM 989  | CD2 | CD2 | . HIS HIS HIS A A 132 132 . 72.796 87.457 28.171 1.00 10.19 |
| 1 . .     |     |     |                                                             |
| ATOM 990  | C   | C   | . HIS HIS HIS A A 132 132 . 73.427 89.690 31.308 1.00 7.97  |
| 1 . .     |     |     |                                                             |
| ATOM 991  | O   | O   | . HIS HIS HIS A A 132 132 . 73.595 88.760 32.103 1.00 8.54  |
| 1 . .     |     |     |                                                             |
| ATOM 992  | N   | N   | . ILE ILE ILE A A 133 133 . 74.427 90.447 30.892 1.00 7.59  |
| 1 . .     |     |     |                                                             |
| ATOM 993  | CA  | CA  | . ILE ILE ILE A A 133 133 . 75.801 90.195 31.376 1.00 8.56  |
| 1 . .     |     |     |                                                             |
| ATOM 994  | CB  | CB  | . ILE ILE ILE A A 133 133 . 76.808 91.079 30.608 1.00 9.07  |
| 1 . .     |     |     |                                                             |
| ATOM 995  | CG1 | CG1 | . ILE ILE ILE A A 133 133 . 76.900 90.547 29.208 1.00 8.31  |
| 1 . .     |     |     |                                                             |
| ATOM 996  | CD1 | CD1 | . ILE ILE ILE A A 133 133 . 77.695 91.569 28.222 1.00 6.69  |
| 1 . .     |     |     |                                                             |
| ATOM 997  | CG2 | CG2 | . ILE ILE ILE A A 133 133 . 78.193 91.095 31.288 1.00 9.14  |
| 1 . .     |     |     |                                                             |
| ATOM 998  | C   | C   | . ILE ILE ILE A A 133 133 . 75.872 90.368 32.902 1.00 9.02  |
| 1 . .     |     |     |                                                             |
| ATOM 999  | O   | O   | . ILE ILE ILE A A 133 133 . 76.496 89.571 33.587 1.00 8.65  |
| 1 . .     |     |     |                                                             |
| ATOM 1000 | N   | N   | . ALA ALA ALA A A 134 134 . 75.269 91.451 33.420 1.00 9.05  |
| 1 . .     |     |     |                                                             |
| ATOM 1001 | CA  | CA  | . ALA ALA ALA A A 134 134 . 75.264 91.651 34.899 1.00 10.86 |
| 1 . .     |     |     |                                                             |
| ATOM 1002 | CB  | CB  | . ALA ALA ALA A A 134 134 . 74.426 92.889 35.216 1.00 9.88  |
| 1 . .     |     |     |                                                             |
| ATOM 1003 | C   | C   | . ALA ALA ALA A A 134 134 . 74.673 90.400 35.585 1.00 9.97  |
| 1 . .     |     |     |                                                             |
| ATOM 1004 | O   | O   | . ALA ALA ALA A A 134 134 . 75.203 89.914 36.587 1.00 11.58 |
| 1 . .     |     |     |                                                             |
| ATOM 1005 | N   | N   | . GLN GLN GLN A A 135 135 . 73.584 89.873 35.026 1.00 12.12 |
| 1 . .     |     |     |                                                             |
| ATOM 1006 | CA  | CA  | . GLN GLN GLN A A 135 135 . 73.006 88.657 35.621 1.00 11.27 |
| 1 . .     |     |     |                                                             |
| ATOM 1007 | CB  | CB  | . GLN GLN GLN A A 135 135 . 71.649 88.277 35.029 1.00 12.15 |
| 1 . .     |     |     |                                                             |
| ATOM 1008 | CG  | CG  | . GLN GLN GLN A A 135 135 . 70.631 89.337 35.362 1.00 13.80 |
| 1 . .     |     |     |                                                             |

























































|           |     |     |                                                              |
|-----------|-----|-----|--------------------------------------------------------------|
| ATOM 1759 | C   | C   | . THR THR THR A A 236 236 . 93.398 119.238 35.594 1.00 14.03 |
| 1 . .     |     |     |                                                              |
| ATOM 1760 | O   | O   | . THR THR THR A A 236 236 . 93.954 118.218 36.049 1.00 13.69 |
| 1 . .     |     |     |                                                              |
| ATOM 1761 | N   | N   | . GLU GLU GLU A A 237 237 . 92.288 119.759 36.143 1.00 14.78 |
| 1 . .     |     |     |                                                              |
| ATOM 1762 | CA  | CA  | . GLU GLU GLU A A 237 237 . 91.834 119.194 37.438 1.00 17.98 |
| 1 . .     |     |     |                                                              |
| ATOM 1763 | CB  | CB  | . GLU GLU GLU A A 237 237 . 91.089 120.272 38.287 1.00 21.07 |
| 1 . .     |     |     |                                                              |
| ATOM 1764 | C   | C   | . GLU GLU GLU A A 237 237 . 90.995 117.914 37.186 1.00 18.33 |
| 1 . .     |     |     |                                                              |
| ATOM 1765 | O   | O   | . GLU GLU GLU A A 237 237 . 90.768 117.083 38.114 1.00 20.92 |
| 1 . .     |     |     |                                                              |
| ATOM 1766 | N   | N   | . LYS LYS LYS A A 238 238 . 90.641 117.648 35.932 1.00 15.02 |
| 1 . .     |     |     |                                                              |
| ATOM 1767 | CA  | CA  | . LYS LYS LYS A A 238 238 . 89.613 116.616 35.725 1.00 11.54 |
| 1 . .     |     |     |                                                              |
| ATOM 1768 | CB  | CB  | . LYS LYS LYS A A 238 238 . 88.430 117.249 34.987 1.00 12.24 |
| 1 . .     |     |     |                                                              |
| ATOM 1769 | CG  | CG  | . LYS LYS LYS A A 238 238 . 87.606 118.266 35.866 1.00 16.37 |
| 1 . .     |     |     |                                                              |
| ATOM 1770 | CD  | CD  | . LYS LYS LYS A A 238 238 . 86.299 118.620 34.983 1.00 18.81 |
| 1 . .     |     |     |                                                              |
| ATOM 1771 | CE  | CE  | . LYS LYS LYS A A 238 238 . 85.117 119.178 35.748 1.00 25.87 |
| 1 . .     |     |     |                                                              |
| ATOM 1772 | NZ  | NZ  | . LYS LYS LYS A A 238 238 . 85.754 120.339 36.267 1.00 30.64 |
| 1 . .     |     |     |                                                              |
| ATOM 1773 | C   | C   | . LYS LYS LYS A A 238 238 . 90.087 115.460 34.865 1.00 10.70 |
| 1 . .     |     |     |                                                              |
| ATOM 1774 | O   | O   | . LYS LYS LYS A A 238 238 . 89.379 114.468 34.746 1.00 9.94  |
| 1 . .     |     |     |                                                              |
| ATOM 1775 | N   | N   | . ILE ILE ILE A A 239 239 . 91.299 115.571 34.320 1.00 9.25  |
| 1 . .     |     |     |                                                              |
| ATOM 1776 | CA  | CA  | . ILE ILE ILE A A 239 239 . 91.766 114.525 33.437 1.00 9.30  |
| 1 . .     |     |     |                                                              |
| ATOM 1777 | CB  | CB  | . ILE ILE ILE A A 239 239 . 91.732 114.982 31.920 1.00 10.95 |
| 1 . .     |     |     |                                                              |
| ATOM 1778 | CG1 | CG1 | . ILE ILE ILE A A 239 239 . 90.268 115.340 31.484 1.00 11.28 |
| 1 . .     |     |     |                                                              |
| ATOM 1779 | CD1 | CD1 | . ILE ILE ILE A A 239 239 . 90.114 116.043 30.065 1.00 13.53 |
| 1 . .     |     |     |                                                              |
| ATOM 1780 | CG2 | CG2 | . ILE ILE ILE A A 239 239 . 92.364 113.824 30.999 1.00 10.39 |
| 1 . .     |     |     |                                                              |
| ATOM 1781 | C   | C   | . ILE ILE ILE A A 239 239 . 93.120 114.087 33.876 1.00 10.14 |
| 1 . .     |     |     |                                                              |
| ATOM 1782 | O   | O   | . ILE ILE ILE A A 239 239 . 94.014 114.921 34.115 1.00 12.32 |
| 1 . .     |     |     |                                                              |
| ATOM 1783 | N   | N   | . VAL VAL VAL A A 240 240 . 93.273 112.770 33.976 1.00 8.63  |
| 1 . .     |     |     |                                                              |
| ATOM 1784 | CA  | CA  | . VAL VAL VAL A A 240 240 . 94.628 112.161 34.355 1.00 9.00  |
| 1 . .     |     |     |                                                              |
| ATOM 1785 | CB  | CB  | . VAL VAL VAL A A 240 240 . 94.565 111.481 35.731 1.00 8.46  |
| 1 . .     |     |     |                                                              |
| ATOM 1786 | CG1 | CG1 | . VAL VAL VAL A A 240 240 . 94.279 112.595 36.783 1.00 12.17 |
| 1 . .     |     |     |                                                              |
| ATOM 1787 | CG2 | CG2 | . VAL VAL VAL A A 240 240 . 93.541 110.336 35.751 1.00 10.44 |
| 1 . .     |     |     |                                                              |
| ATOM 1788 | C   | C   | . VAL VAL VAL A A 240 240 . 95.123 111.192 33.264 1.00 8.14  |
| 1 . .     |     |     |                                                              |

























































































|           |     |     |                                                             |
|-----------|-----|-----|-------------------------------------------------------------|
| ATOM 2959 | C   | C   | . ILE ILE ILE A A 392 392 . 88.448 101.497 28.895 1.00 6.47 |
| 1 . .     |     |     |                                                             |
| ATOM 2960 | O   | O   | . ILE ILE ILE A A 392 392 . 88.464 102.768 28.920 1.00 6.66 |
| 1 . .     |     |     |                                                             |
| ATOM 2961 | N   | N   | . LYS LYS LYS A A 393 393 . 89.285 100.769 28.138 1.00 5.64 |
| 1 . .     |     |     |                                                             |
| ATOM 2962 | CA  | CA  | . LYS LYS LYS A A 393 393 . 90.061 101.495 27.100 1.00 4.87 |
| 1 . .     |     |     |                                                             |
| ATOM 2963 | CB  | CB  | . LYS LYS LYS A A 393 393 . 91.631 101.306 27.238 1.00 4.53 |
| 1 . .     |     |     |                                                             |
| ATOM 2964 | CG  | CG  | . LYS LYS LYS A A 393 393 . 92.160 99.879 27.209 1.00 5.97  |
| 1 . .     |     |     |                                                             |
| ATOM 2965 | CD  | CD  | . LYS LYS LYS A A 393 393 . 93.717 99.953 27.345 1.00 6.73  |
| 1 . .     |     |     |                                                             |
| ATOM 2966 | CE  | CE  | . LYS LYS LYS A A 393 393 . 94.384 98.792 26.542 1.00 5.47  |
| 1 . .     |     |     |                                                             |
| ATOM 2967 | NZ  | NZ  | . LYS LYS LYS A A 393 393 . 95.926 98.939 26.747 1.00 7.67  |
| 1 . .     |     |     |                                                             |
| ATOM 2968 | C   | C   | . LYS LYS LYS A A 393 393 . 89.608 100.869 25.761 1.00 5.68 |
| 1 . .     |     |     |                                                             |
| ATOM 2969 | O   | O   | . LYS LYS LYS A A 393 393 . 89.616 99.616 25.596 1.00 5.36  |
| 1 . .     |     |     |                                                             |
| ATOM 2970 | N   | N   | . THR THR THR A A 394 394 . 89.194 101.722 24.833 1.00 6.30 |
| 1 . .     |     |     |                                                             |
| ATOM 2971 | CA  | CA  | . THR THR THR A A 394 394 . 88.709 101.174 23.564 1.00 6.07 |
| 1 . .     |     |     |                                                             |
| ATOM 2972 | CB  | CB  | . THR THR THR A A 394 394 . 87.222 100.680 23.612 1.00 6.24 |
| 1 . .     |     |     |                                                             |
| ATOM 2973 | OG1 | OG1 | . THR THR THR A A 394 394 . 86.915 100.113 22.322 1.00 6.19 |
| 1 . .     |     |     |                                                             |
| ATOM 2974 | CG2 | CG2 | . THR THR THR A A 394 394 . 86.260 101.875 23.945 1.00 6.51 |
| 1 . .     |     |     |                                                             |
| ATOM 2975 | C   | C   | . THR THR THR A A 394 394 . 89.028 102.156 22.442 1.00 5.40 |
| 1 . .     |     |     |                                                             |
| ATOM 2976 | O   | O   | . THR THR THR A A 394 394 . 88.347 102.195 21.424 1.00 6.80 |
| 1 . .     |     |     |                                                             |
| ATOM 2977 | N   | N   | . GLY GLY GLY A A 395 395 . 90.125 102.911 22.599 1.00 6.18 |
| 1 . .     |     |     |                                                             |
| ATOM 2978 | CA  | CA  | . GLY GLY GLY A A 395 395 . 90.655 103.738 21.493 1.00 6.22 |
| 1 . .     |     |     |                                                             |
| ATOM 2979 | C   | C   | . GLY GLY GLY A A 395 395 . 90.719 105.208 21.833 1.00 5.30 |
| 1 . .     |     |     |                                                             |
| ATOM 2980 | O   | O   | . GLY GLY GLY A A 395 395 . 90.093 105.666 22.827 1.00 7.52 |
| 1 . .     |     |     |                                                             |
| ATOM 2981 | N   | N   | . ALA ALA ALA A A 396 396 . 91.466 105.946 20.986 1.00 6.36 |
| 1 . .     |     |     |                                                             |
| ATOM 2982 | CA  | CA  | . ALA ALA ALA A A 396 396 . 91.270 107.377 20.884 1.00 6.52 |
| 1 . .     |     |     |                                                             |
| ATOM 2983 | CB  | CB  | . ALA ALA ALA A A 396 396 . 92.163 107.939 19.774 1.00 6.77 |
| 1 . .     |     |     |                                                             |
| ATOM 2984 | C   | C   | . ALA ALA ALA A A 396 396 . 89.802 107.583 20.499 1.00 7.21 |
| 1 . .     |     |     |                                                             |
| ATOM 2985 | O   | O   | . ALA ALA ALA A A 396 396 . 89.154 106.635 20.041 1.00 6.72 |
| 1 . .     |     |     |                                                             |
| ATOM 2986 | N   | N   | . PRO PRO PRO A A 397 397 . 89.275 108.834 20.636 1.00 7.18 |
| 1 . .     |     |     |                                                             |
| ATOM 2987 | CA  | CA  | . PRO PRO PRO A A 397 397 . 87.923 109.185 20.069 1.00 5.48 |
| 1 . .     |     |     |                                                             |
| ATOM 2988 | CB  | CB  | . PRO PRO PRO A A 397 397 . 87.547 110.444 20.849 1.00 4.91 |
| 1 . .     |     |     |                                                             |

|           |     |     |                                    |         |        |      |       |
|-----------|-----|-----|------------------------------------|---------|--------|------|-------|
| ATOM 2989 | CG  | CG  | . PRO PRO PRO A A 397 397 . 88.864 | 111.123 | 21.123 | 1.00 | 5.61  |
| 1 . .     |     |     |                                    |         |        |      |       |
| ATOM 2990 | CD  | CD  | . PRO PRO PRO A A 397 397 . 89.891 | 109.976 | 21.378 | 1.00 | 5.04  |
| 1 . .     |     |     |                                    |         |        |      |       |
| ATOM 2991 | C   | C   | . PRO PRO PRO A A 397 397 . 88.062 | 109.398 | 18.568 | 1.00 | 6.35  |
| 1 . .     |     |     |                                    |         |        |      |       |
| ATOM 2992 | O   | O   | . PRO PRO PRO A A 397 397 . 87.733 | 110.467 | 18.074 | 1.00 | 9.01  |
| 1 . .     |     |     |                                    |         |        |      |       |
| ATOM 2993 | N   | N   | . CYS CYS CYS A A 398 398 . 88.657 | 108.418 | 17.853 | 1.00 | 6.16  |
| 1 . .     |     |     |                                    |         |        |      |       |
| ATOM 2994 | CA  | CA  | . CYS CYS CYS A A 398 398 . 88.928 | 108.577 | 16.422 | 1.00 | 5.13  |
| 1 . .     |     |     |                                    |         |        |      |       |
| ATOM 2995 | CB  | CB  | . CYS CYS CYS A A 398 398 . 90.291 | 109.282 | 16.275 | 1.00 | 6.00  |
| 1 . .     |     |     |                                    |         |        |      |       |
| ATOM 2996 | SG  | SG  | . CYS CYS CYS A A 398 398 . 90.853 | 109.339 | 14.520 | 1.00 | 10.28 |
| 1 . .     |     |     |                                    |         |        |      |       |
| ATOM 2997 | C   | C   | . CYS CYS CYS A A 398 398 . 89.008 | 107.146 | 15.853 | 1.00 | 5.93  |
| 1 . .     |     |     |                                    |         |        |      |       |
| ATOM 2998 | O   | O   | . CYS CYS CYS A A 398 398 . 89.602 | 106.267 | 16.531 | 1.00 | 6.11  |
| 1 . .     |     |     |                                    |         |        |      |       |
| ATOM 2999 | N   | N   | . ARG ARG ARG A A 399 399 . 88.463 | 106.928 | 14.642 | 1.00 | 6.32  |
| 1 . .     |     |     |                                    |         |        |      |       |
| ATOM 3000 | CA  | CA  | . ARG ARG ARG A A 399 399 . 88.263 | 105.571 | 13.976 | 1.00 | 6.33  |
| 1 . .     |     |     |                                    |         |        |      |       |
| ATOM 3001 | CB  | CB  | . ARG ARG ARG A A 399 399 . 89.471 | 104.616 | 14.116 | 1.00 | 4.78  |
| 1 . .     |     |     |                                    |         |        |      |       |
| ATOM 3002 | CG  | CG  | . ARG ARG ARG A A 399 399 . 90.690 | 105.292 | 13.549 | 1.00 | 6.47  |
| 1 . .     |     |     |                                    |         |        |      |       |
| ATOM 3003 | CD  | CD  | . ARG ARG ARG A A 399 399 . 91.953 | 104.530 | 13.761 | 1.00 | 5.79  |
| 1 . .     |     |     |                                    |         |        |      |       |
| ATOM 3004 | NE  | NE  | . ARG ARG ARG A A 399 399 . 91.942 | 103.246 | 13.013 | 1.00 | 6.42  |
| 1 . .     |     |     |                                    |         |        |      |       |
| ATOM 3005 | CZ  | CZ  | . ARG ARG ARG A A 399 399 . 92.975 | 102.698 | 12.342 | 1.00 | 6.57  |
| 1 . .     |     |     |                                    |         |        |      |       |
| ATOM 3006 | NH1 | NH1 | . ARG ARG ARG A A 399 399 . 94.169 | 103.364 | 12.197 | 1.00 | 7.48  |
| 1 . .     |     |     |                                    |         |        |      |       |
| ATOM 3007 | NH2 | NH2 | . ARG ARG ARG A A 399 399 . 92.797 | 101.461 | 11.750 | 1.00 | 7.62  |
| 1 . .     |     |     |                                    |         |        |      |       |
| ATOM 3008 | C   | C   | . ARG ARG ARG A A 399 399 . 86.984 | 104.912 | 14.573 | 1.00 | 5.67  |
| 1 . .     |     |     |                                    |         |        |      |       |
| ATOM 3009 | O   | O   | . ARG ARG ARG A A 399 399 . 86.915 | 104.691 | 15.794 | 1.00 | 6.17  |
| 1 . .     |     |     |                                    |         |        |      |       |
| ATOM 3010 | N   | N   | . SER SER SER A A 400 400 . 86.002 | 104.591 | 13.744 | 1.00 | 5.12  |
| 1 . .     |     |     |                                    |         |        |      |       |
| ATOM 3011 | CA  | CA  | . SER SER SER A A 400 400 . 84.716 | 104.215 | 14.355 | 1.00 | 5.43  |
| 1 . .     |     |     |                                    |         |        |      |       |
| ATOM 3012 | CB  | CB  | . SER SER SER A A 400 400 . 83.566 | 104.360 | 13.354 | 1.00 | 4.17  |
| 1 . .     |     |     |                                    |         |        |      |       |
| ATOM 3013 | OG  | OG  | . SER SER SER A A 400 400 . 83.418 | 105.742 | 13.046 | 1.00 | 5.82  |
| 1 . .     |     |     |                                    |         |        |      |       |
| ATOM 3014 | C   | C   | . SER SER SER A A 400 400 . 84.734 | 102.798 | 14.923 | 1.00 | 5.76  |
| 1 . .     |     |     |                                    |         |        |      |       |
| ATOM 3015 | O   | O   | . SER SER SER A A 400 400 . 83.767 | 102.422 | 15.586 | 1.00 | 5.29  |
| 1 . .     |     |     |                                    |         |        |      |       |
| ATOM 3016 | N   | N   | . GLU GLU GLU A A 401 401 . 85.784 | 102.003 | 14.704 | 1.00 | 5.95  |
| 1 . .     |     |     |                                    |         |        |      |       |
| ATOM 3017 | CA  | CA  | . GLU GLU GLU A A 401 401 . 85.901 | 100.746 | 15.514 | 1.00 | 6.66  |
| 1 . .     |     |     |                                    |         |        |      |       |
| ATOM 3018 | CB  | CB  | . GLU GLU GLU A A 401 401 . 86.993 | 99.783  | 15.017 | 1.00 | 5.70  |
| 1 . .     |     |     |                                    |         |        |      |       |























































































































































































































































|           |     |     |                                                             |
|-----------|-----|-----|-------------------------------------------------------------|
| ATOM 6289 | C   | C   | . CYS CYS CYS B B 398 398 . 90.392 101.437 7.639 1.00 8.09  |
| 1 . .     |     |     |                                                             |
| ATOM 6290 | O   | O   | . CYS CYS CYS B B 398 398 . 90.015 102.398 7.013 1.00 7.60  |
| 1 . .     |     |     |                                                             |
| ATOM 6291 | N   | N   | . ARG ARG ARG B B 399 399 . 90.166 101.245 8.931 1.00 7.69  |
| 1 . .     |     |     |                                                             |
| ATOM 6292 | CA  | CA  | . ARG ARG ARG B B 399 399 . 89.285 102.000 9.831 1.00 7.41  |
| 1 . .     |     |     |                                                             |
| ATOM 6293 | CB  | CB  | . ARG ARG ARG B B 399 399 . 89.338 103.526 9.573 1.00 5.68  |
| 1 . .     |     |     |                                                             |
| ATOM 6294 | CG  | CG  | . ARG ARG ARG B B 399 399 . 90.774 104.050 9.759 1.00 6.33  |
| 1 . .     |     |     |                                                             |
| ATOM 6295 | CD  | CD  | . ARG ARG ARG B B 399 399 . 90.858 105.575 9.290 1.00 7.86  |
| 1 . .     |     |     |                                                             |
| ATOM 6296 | NE  | NE  | . ARG ARG ARG B B 399 399 . 89.934 106.467 10.022 1.00 7.64 |
| 1 . .     |     |     |                                                             |
| ATOM 6297 | CZ  | CZ  | . ARG ARG ARG B B 399 399 . 90.330 107.600 10.622 1.00 7.15 |
| 1 . .     |     |     |                                                             |
| ATOM 6298 | NH1 | NH1 | . ARG ARG ARG B B 399 399 . 91.614 108.080 10.595 1.00 8.21 |
| 1 . .     |     |     |                                                             |
| ATOM 6299 | NH2 | NH2 | . ARG ARG ARG B B 399 399 . 89.401 108.289 11.265 1.00 6.88 |
| 1 . .     |     |     |                                                             |
| ATOM 6300 | C   | C   | . ARG ARG ARG B B 399 399 . 87.875 101.481 9.657 1.00 7.35  |
| 1 . .     |     |     |                                                             |
| ATOM 6301 | O   | O   | . ARG ARG ARG B B 399 399 . 87.373 101.478 8.543 1.00 6.29  |
| 1 . .     |     |     |                                                             |
| ATOM 6302 | N   | N   | . SER SER SER B B 400 400 . 87.238 101.024 10.767 1.00 6.15 |
| 1 . .     |     |     |                                                             |
| ATOM 6303 | CA  | CA  | . SER SER SER B B 400 400 . 85.924 100.369 10.585 1.00 5.03 |
| 1 . .     |     |     |                                                             |
| ATOM 6304 | CB  | CB  | . SER SER SER B B 400 400 . 85.590 99.448 11.765 1.00 6.25  |
| 1 . .     |     |     |                                                             |
| ATOM 6305 | OG  | OG  | . SER SER SER B B 400 400 . 86.625 98.480 11.960 1.00 6.93  |
| 1 . .     |     |     |                                                             |
| ATOM 6306 | C   | C   | . SER SER SER B B 400 400 . 84.691 101.216 10.194 1.00 4.96 |
| 1 . .     |     |     |                                                             |
| ATOM 6307 | O   | O   | . SER SER SER B B 400 400 . 83.689 100.659 9.772 1.00 6.54  |
| 1 . .     |     |     |                                                             |
| ATOM 6308 | N   | N   | . GLU GLU GLU B B 401 401 . 84.765 102.550 10.253 1.00 5.67 |
| 1 . .     |     |     |                                                             |
| ATOM 6309 | CA  | CA  | . GLU GLU GLU B B 401 401 . 83.711 103.311 9.565 1.00 6.88  |
| 1 . .     |     |     |                                                             |
| ATOM 6310 | CB  | CB  | . GLU GLU GLU B B 401 401 . 83.851 104.806 9.859 1.00 5.94  |
| 1 . .     |     |     |                                                             |
| ATOM 6311 | CG  | CG  | . GLU GLU GLU B B 401 401 . 84.982 105.566 9.254 1.00 6.45  |
| 1 . .     |     |     |                                                             |
| ATOM 6312 | CD  | CD  | . GLU GLU GLU B B 401 401 . 86.362 105.442 9.985 1.00 6.67  |
| 1 . .     |     |     |                                                             |
| ATOM 6313 | OE1 | OE1 | . GLU GLU GLU B B 401 401 . 86.511 104.697 11.042 1.00 7.78 |
| 1 . .     |     |     |                                                             |
| ATOM 6314 | OE2 | OE2 | . GLU GLU GLU B B 401 401 . 87.301 106.147 9.528 1.00 6.54  |
| 1 . .     |     |     |                                                             |
| ATOM 6315 | C   | C   | . GLU GLU GLU B B 401 401 . 83.802 103.098 8.031 1.00 6.56  |
| 1 . .     |     |     |                                                             |
| ATOM 6316 | O   | O   | . GLU GLU GLU B B 401 401 . 82.828 103.381 7.340 1.00 6.45  |
| 1 . .     |     |     |                                                             |
| ATOM 6317 | N   | N   | . ARG ARG ARG B B 402 402 . 84.940 102.562 7.529 1.00 5.91  |
| 1 . .     |     |     |                                                             |
| ATOM 6318 | CA  | CA  | . ARG ARG ARG B B 402 402 . 85.061 102.173 6.074 1.00 5.48  |
| 1 . .     |     |     |                                                             |































































|      |      |   |   |   |     |     |     |   |   |     |     |   |         |         |         |      |       |   |
|------|------|---|---|---|-----|-----|-----|---|---|-----|-----|---|---------|---------|---------|------|-------|---|
| ATOM | 7159 | O | O | . | HOH | HOH | HOH | S | . | 586 | 586 | . | 112.250 | 103.974 | 9.265   | 1.00 | 34.64 |   |
| 1    | .    | . | . | . | .   | .   | .   | . | . | .   | .   | . | .       | .       | .       | .    | .     | . |
| ATOM | 7160 | O | O | . | HOH | HOH | HOH | S | . | 587 | 587 | . | 69.868  | 123.513 | -16.805 | 1.00 | 34.62 |   |
| 1    | .    | . | . | . | .   | .   | .   | . | . | .   | .   | . | .       | .       | .       | .    | .     | . |
| ATOM | 7161 | O | O | . | HOH | HOH | HOH | S | . | 588 | 588 | . | 54.404  | 115.152 | 1.769   | 1.00 | 26.94 |   |
| 1    | .    | . | . | . | .   | .   | .   | . | . | .   | .   | . | .       | .       | .       | .    | .     | . |
| ATOM | 7162 | O | O | . | HOH | HOH | HOH | S | . | 589 | 589 | . | 73.278  | 101.475 | 13.195  | 1.00 | 30.64 |   |
| 1    | .    | . | . | . | .   | .   | .   | . | . | .   | .   | . | .       | .       | .       | .    | .     | . |
| ATOM | 7163 | O | O | . | HOH | HOH | HOH | S | . | 590 | 590 | . | 98.014  | 86.755  | -3.299  | 1.00 | 34.74 |   |
| 1    | .    | . | . | . | .   | .   | .   | . | . | .   | .   | . | .       | .       | .       | .    | .     | . |
| ATOM | 7164 | O | O | . | HOH | HOH | HOH | S | . | 591 | 591 | . | 107.921 | 112.918 | 10.084  | 1.00 | 37.08 |   |
| 1    | .    | . | . | . | .   | .   | .   | . | . | .   | .   | . | .       | .       | .       | .    | .     | . |
| ATOM | 7165 | O | O | . | HOH | HOH | HOH | S | . | 592 | 592 | . | 77.751  | 130.401 | 21.243  | 1.00 | 32.14 |   |
| 1    | .    | . | . | . | .   | .   | .   | . | . | .   | .   | . | .       | .       | .       | .    | .     | . |
| ATOM | 7166 | O | O | . | HOH | HOH | HOH | S | . | 594 | 594 | . | 109.957 | 113.096 | 33.178  | 1.00 | 38.20 |   |
| 1    | .    | . | . | . | .   | .   | .   | . | . | .   | .   | . | .       | .       | .       | .    | .     | . |
| ATOM | 7167 | O | O | . | HOH | HOH | HOH | S | . | 595 | 595 | . | 113.693 | 105.525 | 41.085  | 1.00 | 34.79 |   |
| 1    | .    | . | . | . | .   | .   | .   | . | . | .   | .   | . | .       | .       | .       | .    | .     | . |
| ATOM | 7168 | O | O | . | HOH | HOH | HOH | S | . | 596 | 596 | . | 85.632  | 124.505 | 26.664  | 1.00 | 43.43 |   |
| 1    | .    | . | . | . | .   | .   | .   | . | . | .   | .   | . | .       | .       | .       | .    | .     | . |
| ATOM | 7169 | O | O | . | HOH | HOH | HOH | S | . | 597 | 597 | . | 105.922 | 110.551 | 42.904  | 1.00 | 26.22 |   |
| 1    | .    | . | . | . | .   | .   | .   | . | . | .   | .   | . | .       | .       | .       | .    | .     | . |
| ATOM | 7170 | O | O | . | HOH | HOH | HOH | S | . | 598 | 598 | . | 94.881  | 80.438  | -2.276  | 1.00 | 38.59 |   |
| 1    | .    | . | . | . | .   | .   | .   | . | . | .   | .   | . | .       | .       | .       | .    | .     | . |
| ATOM | 7171 | O | O | . | HOH | HOH | HOH | S | . | 599 | 599 | . | 80.040  | 107.725 | -18.354 | 1.00 | 30.43 |   |
| 1    | .    | . | . | . | .   | .   | .   | . | . | .   | .   | . | .       | .       | .       | .    | .     | . |
| ATOM | 7172 | O | O | . | HOH | HOH | HOH | S | . | 600 | 600 | . | 74.950  | 119.963 | 27.005  | 1.00 | 48.28 |   |
| 1    | .    | . | . | . | .   | .   | .   | . | . | .   | .   | . | .       | .       | .       | .    | .     | . |
| ATOM | 7173 | O | O | . | HOH | HOH | HOH | S | . | 601 | 601 | . | 104.994 | 97.618  | 6.481   | 1.00 | 31.84 |   |
| 1    | .    | . | . | . | .   | .   | .   | . | . | .   | .   | . | .       | .       | .       | .    | .     | . |
| ATOM | 7174 | O | O | . | HOH | HOH | HOH | S | . | 602 | 602 | . | 115.253 | 93.960  | 36.462  | 1.00 | 22.42 |   |
| 1    | .    | . | . | . | .   | .   | .   | . | . | .   | .   | . | .       | .       | .       | .    | .     | . |
| ATOM | 7175 | O | O | . | HOH | HOH | HOH | S | . | 603 | 603 | . | 89.879  | 121.316 | 16.194  | 1.00 | 39.14 |   |
| 1    | .    | . | . | . | .   | .   | .   | . | . | .   | .   | . | .       | .       | .       | .    | .     | . |
| ATOM | 7176 | O | O | . | HOH | HOH | HOH | S | . | 604 | 604 | . | 64.999  | 129.339 | 0.789   | 1.00 | 28.43 |   |
| 1    | .    | . | . | . | .   | .   | .   | . | . | .   | .   | . | .       | .       | .       | .    | .     | . |
| ATOM | 7177 | O | O | . | HOH | HOH | HOH | S | . | 605 | 605 | . | 67.164  | 107.613 | -20.803 | 1.00 | 39.42 |   |
| 1    | .    | . | . | . | .   | .   | .   | . | . | .   | .   | . | .       | .       | .       | .    | .     | . |
| ATOM | 7178 | O | O | . | HOH | HOH | HOH | S | . | 606 | 606 | . | 65.769  | 120.329 | -10.993 | 1.00 | 34.66 |   |
| 1    | .    | . | . | . | .   | .   | .   | . | . | .   | .   | . | .       | .       | .       | .    | .     | . |
| ATOM | 7179 | O | O | . | HOH | HOH | HOH | S | . | 607 | 607 | . | 85.803  | 123.330 | 3.721   | 1.00 | 28.94 |   |
| 1    | .    | . | . | . | .   | .   | .   | . | . | .   | .   | . | .       | .       | .       | .    | .     | . |
| ATOM | 7180 | O | O | . | HOH | HOH | HOH | S | . | 608 | 608 | . | 96.691  | 74.646  | 16.299  | 1.00 | 38.63 |   |
| 1    | .    | . | . | . | .   | .   | .   | . | . | .   | .   | . | .       | .       | .       | .    | .     | . |
| ATOM | 7181 | O | O | . | HOH | HOH | HOH | S | . | 609 | 609 | . | 93.815  | 101.143 | -17.233 | 1.00 | 25.52 |   |
| 1    | .    | . | . | . | .   | .   | .   | . | . | .   | .   | . | .       | .       | .       | .    | .     | . |
| ATOM | 7182 | O | O | . | HOH | HOH | HOH | S | . | 610 | 610 | . | 78.452  | 127.248 | 13.336  | 1.00 | 33.52 |   |
| 1    | .    | . | . | . | .   | .   | .   | . | . | .   | .   | . | .       | .       | .       | .    | .     | . |
| ATOM | 7183 | O | O | . | HOH | HOH | HOH | S | . | 612 | 612 | . | 91.903  | 106.781 | -21.662 | 1.00 | 37.07 |   |
| 1    | .    | . | . | . | .   | .   | .   | . | . | .   | .   | . | .       | .       | .       | .    | .     | . |
| ATOM | 7184 | O | O | . | HOH | HOH | HOH | S | . | 614 | 614 | . | 86.408  | 76.987  | 3.677   | 1.00 | 38.39 |   |
| 1    | .    | . | . | . | .   | .   | .   | . | . | .   | .   | . | .       | .       | .       | .    | .     | . |
| ATOM | 7185 | O | O | . | HOH | HOH | HOH | S | . | 615 | 615 | . | 94.946  | 104.048 | 31.174  | 1.00 | 38.85 |   |
| 1    | .    | . | . | . | .   | .   | .   | . | . | .   | .   | . | .       | .       | .       | .    | .     | . |
| ATOM | 7186 | O | O | . | HOH | HOH | HOH | S | . | 616 | 616 | . | 92.711  | 123.776 | 19.593  | 1.00 | 34.67 |   |
| 1    | .    | . | . | . | .   | .   | .   | . | . | .   | .   | . | .       | .       | .       | .    | .     | . |

#  
loop\_  
\_atom\_site\_anisotrop.id  
\_atom\_site\_anisotrop.pdbx\_auth\_atom\_id



```

_atom_site_anisotrop.pdbx_label_atom_id
_atom_site_anisotrop.pdbx_label_alt_id
_atom_site_anisotrop.pdbx_auth_comp_id
_atom_site_anisotrop.pdbx_label_comp_id
_atom_site_anisotrop.pdbx_orig_comp_id
_atom_site_anisotrop.pdbx_auth_asym_id
_atom_site_anisotrop.pdbx_label_asym_id
_atom_site_anisotrop.pdbx_auth_seq_id
_atom_site_anisotrop.pdbx_label_seq_id
_atom_site_anisotrop.pdbx_PDB_ins_code
_atom_site_anisotrop.U[1][1]
_atom_site_anisotrop.U[2][2]
_atom_site_anisotrop.U[3][3]
_atom_site_anisotrop.U[1][2]
_atom_site_anisotrop.U[1][3]
_atom_site_anisotrop.U[2][3]
_atom_site_anisotrop.pdbx_PDB_model_num
_atom_site_anisotrop.type_symbol
1  N  N  . SER SER SER A A 1 1  . 0.2052 0.2175 0.2545 0.0055 0.0255
0.0020 1 .
2  CA CA  . SER SER SER A A 1 1  . 0.2195 0.2154 0.2556 -0.0016 0.0351
0.0099 1 .
3  CB CB  . SER SER SER A A 1 1  . 0.2599 0.2183 0.2536 -0.0072 0.0139
0.0170 1 .
4  OG OG  . SER SER SER A A 1 1  . 0.3501 0.2720 0.3850 -0.0463 0.0126 -
0.0241 1 .
5  C  C  . SER SER SER A A 1 1  . 0.2002 0.2204 0.2238 0.0062 0.0263
0.0099 1 .
6  O  O  . SER SER SER A A 1 1  . 0.1889 0.2468 0.2304 0.0008 0.0392
0.0302 1 .
7  N  N  . ILE ILE ILE A A 2 2  . 0.1721 0.1900 0.1934 0.0023 0.0300 -
0.0025 1 .
8  CA CA  . ILE ILE ILE A A 2 2  . 0.1437 0.1518 0.1926 -0.0005 0.0248 -
0.0030 1 .
9  CB CB  . ILE ILE ILE A A 2 2  . 0.1221 0.1407 0.1708 0.0010 0.0174 -
0.0165 1 .
10 CG1 CG1 . ILE ILE ILE A A 2 2  . 0.1237 0.1360 0.1669 0.0218 -0.0013
0.0000 1 .
11 CD1 CD1 . ILE ILE ILE A A 2 2  . 0.1049 0.1563 0.1760 -0.0086 0.0116
0.0024 1 .
12 CG2 CG2 . ILE ILE ILE A A 2 2  . 0.1565 0.1331 0.1683 -0.0119 0.0051
0.0032 1 .
13 C  C  . ILE ILE ILE A A 2 2  . 0.1661 0.1854 0.2068 0.0002 0.0251
0.0025 1 .
14 O  O  . ILE ILE ILE A A 2 2  . 0.1494 0.1547 0.2394 0.0064 0.0333
0.0027 1 .
15 N  N  . GLN GLN GLN A A 3 3  . 0.1638 0.1800 0.2249 0.0095 0.0035
0.0004 1 .
16 CA CA  . GLN GLN GLN A A 3 3  . 0.2064 0.2034 0.2437 -0.0007 0.0041 -
0.0014 1 .
17 CB CB  . GLN GLN GLN A A 3 3  . 0.2271 0.2140 0.2523 0.0062 0.0010
0.0130 1 .
18 CG CG  . GLN GLN GLN A A 3 3  . 0.2605 0.2901 0.2992 0.0047 0.0228 -
0.0189 1 .
19 CD CD  . GLN GLN GLN A A 3 3  . 0.3855 0.4704 0.4721 0.0193 0.0080
0.0341 1 .
20 OE1 OE1 . GLN GLN GLN A A 3 3  . 0.4418 0.5306 0.5072 0.0289 0.0348
0.0505 1 .
21 NE2 NE2 . GLN GLN GLN A A 3 3  . 0.4129 0.5635 0.5112 -0.0217 0.0290
0.0245 1 .

```



|        |     |     |                         |                                         |
|--------|-----|-----|-------------------------|-----------------------------------------|
| 52     | C   | C   | . TRP TRP TRP A A 6 6   | . 0.1370 0.1230 0.1271 -0.0101 -0.0067  |
| 0.0091 | 1   | .   |                         |                                         |
| 53     | O   | O   | . TRP TRP TRP A A 6 6   | . 0.1734 0.1315 0.1236 -0.0165 -0.0140  |
| 0.0097 | 1   | .   |                         |                                         |
| 54     | N   | N   | . ALA ALA ALA A A 7 7   | . 0.1140 0.1122 0.1346 -0.0024 -0.0069  |
| 0.0144 | 1   | .   |                         |                                         |
| 55     | CA  | CA  | . ALA ALA ALA A A 7 7   | . 0.1037 0.1052 0.1269 -0.0044 -0.0085  |
| 0.0170 | 1   | .   |                         |                                         |
| 56     | CB  | CB  | . ALA ALA ALA A A 7 7   | . 0.1423 0.1151 0.1211 -0.0139 -0.0254  |
| 0.0232 | 1   | .   |                         |                                         |
| 57     | C   | C   | . ALA ALA ALA A A 7 7   | . 0.1143 0.1007 0.1189 -0.0087 -0.0072  |
| 0.0021 | 1   | .   |                         |                                         |
| 58     | O   | O   | . ALA ALA ALA A A 7 7   | . 0.1338 0.1007 0.1138 -0.0009 -0.0098  |
| 0.0080 | 1   | .   |                         |                                         |
| 59     | N   | N   | . ARG ARG ARG A A 8 8   | . 0.1279 0.0908 0.1188 -0.0098 0.0034 - |
| 0.0094 | 1   | .   |                         |                                         |
| 60     | CA  | CA  | . ARG ARG ARG A A 8 8   | . 0.1187 0.1053 0.1062 0.0065 0.0063 -  |
| 0.0151 | 1   | .   |                         |                                         |
| 61     | CB  | CB  | . ARG ARG ARG A A 8 8   | . 0.1055 0.0787 0.0826 0.0119 -0.0169 - |
| 0.0127 | 1   | .   |                         |                                         |
| 62     | CG  | CG  | . ARG ARG ARG A A 8 8   | . 0.1361 0.0779 0.0666 0.0255 0.0000 -  |
| 0.0264 | 1   | .   |                         |                                         |
| 63     | CD  | CD  | . ARG ARG ARG A A 8 8   | . 0.1383 0.1009 0.0878 0.0222 -0.0227   |
| 0.0192 | 1   | .   |                         |                                         |
| 64     | NE  | NE  | . ARG ARG ARG A A 8 8   | . 0.1393 0.0917 0.1417 -0.0086 0.0304 - |
| 0.0110 | 1   | .   |                         |                                         |
| 65     | CZ  | CZ  | . ARG ARG ARG A A 8 8   | . 0.1099 0.1507 0.1280 -0.0030 0.0007 - |
| 0.0389 | 1   | .   |                         |                                         |
| 66     | NH1 | NH1 | . ARG ARG ARG A A 8 8   | . 0.1178 0.1215 0.1872 0.0096 -0.0054 - |
| 0.0419 | 1   | .   |                         |                                         |
| 67     | NH2 | NH2 | . ARG ARG ARG A A 8 8   | . 0.1375 0.1483 0.2248 0.0241 0.0088 -  |
| 0.0135 | 1   | .   |                         |                                         |
| 68     | C   | C   | . ARG ARG ARG A A 8 8   | . 0.1154 0.1103 0.1034 -0.0012 0.0060 - |
| 0.0111 | 1   | .   |                         |                                         |
| 69     | O   | O   | . ARG ARG ARG A A 8 8   | . 0.1177 0.1148 0.1059 -0.0053 -0.0044  |
| 0.0079 | 1   | .   |                         |                                         |
| 70     | N   | N   | . GLU GLU GLU A A 9 9   | . 0.1335 0.1100 0.1151 -0.0007 -0.0073  |
| 0.0133 | 1   | .   |                         |                                         |
| 71     | CA  | CA  | . GLU GLU GLU A A 9 9   | . 0.1435 0.1107 0.1146 0.0052 -0.0050 - |
| 0.0060 | 1   | .   |                         |                                         |
| 72     | CB  | CB  | . GLU GLU GLU A A 9 9   | . 0.1720 0.1785 0.1723 -0.0179 0.0141 - |
| 0.0058 | 1   | .   |                         |                                         |
| 73     | CG  | CG  | . GLU GLU GLU A A 9 9   | . 0.1596 0.2621 0.1575 0.0162 0.0079 -  |
| 0.0202 | 1   | .   |                         |                                         |
| 74     | CD  | CD  | . GLU GLU GLU A A 9 9   | . 0.1853 0.2549 0.1604 0.0852 -0.0148 - |
| 0.0444 | 1   | .   |                         |                                         |
| 75     | OE1 | OE1 | . GLU GLU GLU A A 9 9   | . 0.1648 0.1223 0.1158 0.0211 0.0133    |
| 0.0047 | 1   | .   |                         |                                         |
| 76     | OE2 | OE2 | . GLU GLU GLU A A 9 9   | . 0.2293 0.2493 0.1443 0.0718 0.0411    |
| 0.0113 | 1   | .   |                         |                                         |
| 77     | C   | C   | . GLU GLU GLU A A 9 9   | . 0.1480 0.1191 0.1193 0.0052 -0.0186 - |
| 0.0052 | 1   | .   |                         |                                         |
| 78     | O   | O   | . GLU GLU GLU A A 9 9   | . 0.2366 0.1192 0.1628 0.0052 -0.0549 - |
| 0.0201 | 1   | .   |                         |                                         |
| 79     | N   | N   | . ILE ILE ILE A A 10 10 | . 0.1284 0.0835 0.1133 0.0146 -0.0180 - |
| 0.0069 | 1   | .   |                         |                                         |
| 80     | CA  | CA  | . ILE ILE ILE A A 10 10 | . 0.1061 0.0799 0.1047 0.0016 0.0052    |
| 0.0119 | 1   | .   |                         |                                         |
| 81     | CB  | CB  | . ILE ILE ILE A A 10 10 | . 0.0937 0.0648 0.0787 0.0103 -0.0145   |
| 0.0005 | 1   | .   |                         |                                         |

|        |     |     |                         |                                         |
|--------|-----|-----|-------------------------|-----------------------------------------|
| 82     | CG1 | CG1 | . ILE ILE ILE A A 10 10 | . 0.0897 0.0968 0.0494 0.0075 0.0182 -  |
| 0.0196 | 1 . |     |                         |                                         |
| 83     | CD1 | CD1 | . ILE ILE ILE A A 10 10 | . 0.1677 0.0769 0.1201 0.0317 0.0153 -  |
| 0.0192 | 1 . |     |                         |                                         |
| 84     | CG2 | CG2 | . ILE ILE ILE A A 10 10 | . 0.0689 0.0865 0.1206 -0.0005 -0.0302  |
| 0.0269 | 1 . |     |                         |                                         |
| 85     | C   | C   | . ILE ILE ILE A A 10 10 | . 0.1087 0.0843 0.0904 0.0121 -0.0089 - |
| 0.0099 | 1 . |     |                         |                                         |
| 86     | O   | O   | . ILE ILE ILE A A 10 10 | . 0.1301 0.1099 0.1019 0.0081 0.0030    |
| 0.0175 | 1 . |     |                         |                                         |
| 87     | N   | N   | . LEU LEU LEU A A 11 11 | . 0.0903 0.0757 0.0609 -0.0013 0.0108   |
| 0.0161 | 1 . |     |                         |                                         |
| 88     | CA  | CA  | . LEU LEU LEU A A 11 11 | . 0.1063 0.0892 0.0528 -0.0072 0.0173 - |
| 0.0073 | 1 . |     |                         |                                         |
| 89     | CB  | CB  | . LEU LEU LEU A A 11 11 | . 0.1305 0.0841 0.0831 -0.0009 0.0216   |
| 0.0103 | 1 . |     |                         |                                         |
| 90     | CG  | CG  | . LEU LEU LEU A A 11 11 | . 0.1200 0.1014 0.0521 0.0079 0.0415    |
| 0.0289 | 1 . |     |                         |                                         |
| 91     | CD1 | CD1 | . LEU LEU LEU A A 11 11 | . 0.1787 0.1104 0.0425 -0.0041 0.0215   |
| 0.0340 | 1 . |     |                         |                                         |
| 92     | CD2 | CD2 | . LEU LEU LEU A A 11 11 | . 0.1524 0.1475 0.0560 0.0559 0.0078    |
| 0.0196 | 1 . |     |                         |                                         |
| 93     | C   | C   | . LEU LEU LEU A A 11 11 | . 0.1005 0.0578 0.0752 0.0059 0.0130    |
| 0.0047 | 1 . |     |                         |                                         |
| 94     | O   | O   | . LEU LEU LEU A A 11 11 | . 0.0912 0.0885 0.1044 0.0099 0.0010    |
| 0.0205 | 1 . |     |                         |                                         |
| 95     | N   | N   | . ASP ASP ASP A A 12 12 | . 0.0913 0.0796 0.0622 -0.0080 0.0133 - |
| 0.0131 | 1 . |     |                         |                                         |
| 96     | CA  | CA  | . ASP ASP ASP A A 12 12 | . 0.1070 0.0668 0.0682 0.0104 -0.0090 - |
| 0.0003 | 1 . |     |                         |                                         |
| 97     | CB  | CB  | . ASP ASP ASP A A 12 12 | . 0.0533 0.0834 0.0815 0.0281 0.0056    |
| 0.0006 | 1 . |     |                         |                                         |
| 98     | CG  | CG  | . ASP ASP ASP A A 12 12 | . 0.0993 0.1033 0.0973 0.0182 0.0165 -  |
| 0.0037 | 1 . |     |                         |                                         |
| 99     | OD1 | OD1 | . ASP ASP ASP A A 12 12 | . 0.1052 0.0852 0.0973 0.0129 -0.0062   |
| 0.0062 | 1 . |     |                         |                                         |
| 100    | OD2 | OD2 | . ASP ASP ASP A A 12 12 | . 0.1667 0.1311 0.1261 0.0258 0.0069    |
| 0.0087 | 1 . |     |                         |                                         |
| 101    | C   | C   | . ASP ASP ASP A A 12 12 | . 0.0766 0.0848 0.0782 -0.0008 0.0015 - |
| 0.0064 | 1 . |     |                         |                                         |
| 102    | O   | O   | . ASP ASP ASP A A 12 12 | . 0.1088 0.0916 0.0823 0.0160 0.0000    |
| 0.0056 | 1 . |     |                         |                                         |
| 103    | N   | N   | . SER SER SER A A 13 13 | . 0.0905 0.0700 0.0648 0.0178 0.0100 -  |
| 0.0091 | 1 . |     |                         |                                         |
| 104    | CA  | CA  | . SER SER SER A A 13 13 | . 0.0575 0.0651 0.0477 -0.0069 0.0175 - |
| 0.0097 | 1 . |     |                         |                                         |
| 105    | CB  | CB  | . SER SER SER A A 13 13 | . 0.0689 0.0598 0.0737 0.0202 0.0004 -  |
| 0.0242 | 1 . |     |                         |                                         |
| 106    | OG  | OG  | . SER SER SER A A 13 13 | . 0.1081 0.1070 0.1203 0.0200 0.0035    |
| 0.0253 | 1 . |     |                         |                                         |
| 107    | C   | C   | . SER SER SER A A 13 13 | . 0.0988 0.0865 0.0883 -0.0003 0.0089 - |
| 0.0026 | 1 . |     |                         |                                         |
| 108    | O   | O   | . SER SER SER A A 13 13 | . 0.1193 0.1097 0.1040 0.0013 0.0188 -  |
| 0.0115 | 1 . |     |                         |                                         |
| 109    | N   | N   | . ARG ARG ARG A A 14 14 | . 0.0792 0.1072 0.0789 0.0038 0.0095 -  |
| 0.0137 | 1 . |     |                         |                                         |
| 110    | CA  | CA  | . ARG ARG ARG A A 14 14 | . 0.1099 0.1044 0.1047 0.0085 0.0084    |
| 0.0009 | 1 . |     |                         |                                         |
| 111    | CB  | CB  | . ARG ARG ARG A A 14 14 | . 0.0943 0.1168 0.0974 -0.0037 -0.0080  |
| 0.0034 | 1 . |     |                         |                                         |

|        |     |     |                         |                                          |
|--------|-----|-----|-------------------------|------------------------------------------|
| 112    | CG  | CG  | . ARG ARG ARG A A 14 14 | . 0.0835 0.1233 0.1382 0.0107 0.0053 -   |
| 0.0322 | 1   | .   |                         |                                          |
| 113    | CD  | CD  | . ARG ARG ARG A A 14 14 | . 0.1277 0.1326 0.1282 0.0537 0.0124     |
| 0.0298 | 1   | .   |                         |                                          |
| 114    | NE  | NE  | . ARG ARG ARG A A 14 14 | . 0.1382 0.1835 0.1440 0.0195 -0.0217 -  |
| 0.0129 | 1   | .   |                         |                                          |
| 115    | CZ  | CZ  | . ARG ARG ARG A A 14 14 | . 0.0927 0.1378 0.1141 0.0198 -0.0118    |
| 0.0237 | 1   | .   |                         |                                          |
| 116    | NH1 | NH1 | . ARG ARG ARG A A 14 14 | . 0.1240 0.1075 0.1165 0.0307 0.0445     |
| 0.0150 | 1   | .   |                         |                                          |
| 117    | NH2 | NH2 | . ARG ARG ARG A A 14 14 | . 0.1051 0.1036 0.1421 -0.0141 -0.0015 - |
| 0.0087 | 1   | .   |                         |                                          |
| 118    | C   | C   | . ARG ARG ARG A A 14 14 | . 0.1117 0.0735 0.1051 -0.0016 0.0101    |
| 0.0041 | 1   | .   |                         |                                          |
| 119    | O   | O   | . ARG ARG ARG A A 14 14 | . 0.1546 0.1310 0.1449 0.0187 0.0315 -   |
| 0.0259 | 1   | .   |                         |                                          |
| 120    | N   | N   | . GLY GLY GLY A A 15 15 | . 0.0986 0.0741 0.0840 0.0085 -0.0079    |
| 0.0004 | 1   | .   |                         |                                          |
| 121    | CA  | CA  | . GLY GLY GLY A A 15 15 | . 0.0980 0.0762 0.1074 0.0181 0.0158 -   |
| 0.0085 | 1   | .   |                         |                                          |
| 122    | C   | C   | . GLY GLY GLY A A 15 15 | . 0.1295 0.1092 0.1116 0.0335 0.0110     |
| 0.0025 | 1   | .   |                         |                                          |
| 123    | O   | O   | . GLY GLY GLY A A 15 15 | . 0.1380 0.1192 0.1066 0.0347 0.0145 -   |
| 0.0020 | 1   | .   |                         |                                          |
| 124    | N   | N   | . ASN ASN ASN A A 16 16 | . 0.1025 0.0788 0.0870 0.0289 0.0188     |
| 0.0238 | 1   | .   |                         |                                          |
| 125    | CA  | CA  | . ASN ASN ASN A A 16 16 | . 0.1139 0.1069 0.1235 0.0017 0.0151     |
| 0.0059 | 1   | .   |                         |                                          |
| 126    | CB  | CB  | . ASN ASN ASN A A 16 16 | . 0.0934 0.1184 0.0933 0.0031 0.0086     |
| 0.0272 | 1   | .   |                         |                                          |
| 127    | CG  | CG  | . ASN ASN ASN A A 16 16 | . 0.1322 0.1349 0.1469 0.0221 -0.0048    |
| 0.0174 | 1   | .   |                         |                                          |
| 128    | OD1 | OD1 | . ASN ASN ASN A A 16 16 | . 0.1769 0.1610 0.1831 0.0499 0.0505     |
| 0.0298 | 1   | .   |                         |                                          |
| 129    | ND2 | ND2 | . ASN ASN ASN A A 16 16 | . 0.1552 0.1191 0.1615 0.0580 -0.0318 -  |
| 0.0150 | 1   | .   |                         |                                          |
| 130    | C   | C   | . ASN ASN ASN A A 16 16 | . 0.0927 0.0884 0.0882 -0.0012 0.0206    |
| 0.0117 | 1   | .   |                         |                                          |
| 131    | O   | O   | . ASN ASN ASN A A 16 16 | . 0.1195 0.0887 0.0826 0.0104 0.0287     |
| 0.0004 | 1   | .   |                         |                                          |
| 132    | N   | N   | . PRO PRO PRO A A 17 17 | . 0.1103 0.1047 0.1003 0.0107 0.0272 -   |
| 0.0093 | 1   | .   |                         |                                          |
| 133    | CA  | CA  | . PRO PRO PRO A A 17 17 | . 0.1119 0.0941 0.0789 -0.0005 0.0257 -  |
| 0.0170 | 1   | .   |                         |                                          |
| 134    | CB  | CB  | . PRO PRO PRO A A 17 17 | . 0.0952 0.0969 0.1006 0.0143 0.0384 -   |
| 0.0168 | 1   | .   |                         |                                          |
| 135    | CG  | CG  | . PRO PRO PRO A A 17 17 | . 0.1410 0.1205 0.0785 0.0060 0.0263 -   |
| 0.0036 | 1   | .   |                         |                                          |
| 136    | CD  | CD  | . PRO PRO PRO A A 17 17 | . 0.1212 0.1419 0.1258 0.0217 0.0346 -   |
| 0.0096 | 1   | .   |                         |                                          |
| 137    | C   | C   | . PRO PRO PRO A A 17 17 | . 0.1201 0.0920 0.0906 0.0098 0.0139     |
| 0.0055 | 1   | .   |                         |                                          |
| 138    | O   | O   | . PRO PRO PRO A A 17 17 | . 0.1213 0.1152 0.0881 0.0106 0.0159 -   |
| 0.0200 | 1   | .   |                         |                                          |
| 139    | N   | N   | . THR THR THR A A 18 18 | . 0.1042 0.0839 0.0882 0.0126 0.0113     |
| 0.0220 | 1   | .   |                         |                                          |
| 140    | CA  | CA  | . THR THR THR A A 18 18 | . 0.1144 0.0880 0.0781 0.0035 0.0195 -   |
| 0.0037 | 1   | .   |                         |                                          |
| 141    | CB  | CB  | . THR THR THR A A 18 18 | . 0.1243 0.0876 0.0630 0.0207 0.0188 -   |
| 0.0016 | 1   | .   |                         |                                          |





|        |     |     |                           |        |        |        |         |         |   |
|--------|-----|-----|---------------------------|--------|--------|--------|---------|---------|---|
| 202    | C   | C   | . THR THR THR A A 25 25 . | 0.1715 | 0.1947 | 0.2141 | -0.0189 | -0.0071 |   |
| 0.0153 | 1   | .   |                           |        |        |        |         |         |   |
| 203    | O   | O   | . THR THR THR A A 25 25 . | 0.1560 | 0.2487 | 0.2084 | -0.0255 | -0.0334 |   |
| 0.0194 | 1   | .   |                           |        |        |        |         |         |   |
| 204    | N   | N   | . ALA ALA ALA A A 26 26 . | 0.1700 | 0.2131 | 0.2580 | -0.0284 | 0.0156  |   |
| 0.0192 | 1   | .   |                           |        |        |        |         |         |   |
| 205    | CA  | CA  | . ALA ALA ALA A A 26 26 . | 0.2180 | 0.2318 | 0.2860 | -0.0132 | 0.0033  |   |
| 0.0237 | 1   | .   |                           |        |        |        |         |         |   |
| 206    | CB  | CB  | . ALA ALA ALA A A 26 26 . | 0.2026 | 0.2227 | 0.3087 | -0.0418 | 0.0222  |   |
| 0.0309 | 1   | .   |                           |        |        |        |         |         |   |
| 207    | C   | C   | . ALA ALA ALA A A 26 26 . | 0.2263 | 0.2464 | 0.2899 | -0.0040 | 0.0008  |   |
| 0.0296 | 1   | .   |                           |        |        |        |         |         |   |
| 208    | O   | O   | . ALA ALA ALA A A 26 26 . | 0.1905 | 0.2621 | 0.3360 | -0.0130 | -0.0156 |   |
| 0.0364 | 1   | .   |                           |        |        |        |         |         |   |
| 209    | N   | N   | . LYS LYS LYS A A 27 27 . | 0.1937 | 0.2510 | 0.2805 | -0.0046 | 0.0086  |   |
| 0.0179 | 1   | .   |                           |        |        |        |         |         |   |
| 210    | CA  | CA  | . LYS LYS LYS A A 27 27 . | 0.2250 | 0.2559 | 0.2805 | 0.0005  | 0.0247  |   |
| 0.0162 | 1   | .   |                           |        |        |        |         |         |   |
| 211    | CB  | CB  | . LYS LYS LYS A A 27 27 . | 0.2521 | 0.2735 | 0.2916 | 0.0153  | 0.0437  |   |
| 0.0136 | 1   | .   |                           |        |        |        |         |         |   |
| 212    | CG  | CG  | . LYS LYS LYS A A 27 27 . | 0.2930 | 0.2783 | 0.3457 | 0.0350  | 0.0594  |   |
| 0.0349 | 1   | .   |                           |        |        |        |         |         |   |
| 213    | CD  | CD  | . LYS LYS LYS A A 27 27 . | 0.3321 | 0.3438 | 0.4426 | 0.0410  | 0.0850  |   |
| 0.0337 | 1   | .   |                           |        |        |        |         |         |   |
| 214    | CE  | CE  | . LYS LYS LYS A A 27 27 . | 0.3441 | 0.4228 | 0.4532 | 0.0726  | 0.0851  | - |
| 0.0192 | 1   | .   |                           |        |        |        |         |         |   |
| 215    | NZ  | NZ  | . LYS LYS LYS A A 27 27 . | 0.3356 | 0.5011 | 0.4887 | 0.0315  | 0.0850  | - |
| 0.0140 | 1   | .   |                           |        |        |        |         |         |   |
| 216    | C   | C   | . LYS LYS LYS A A 27 27 . | 0.2381 | 0.2531 | 0.2932 | 0.0004  | 0.0188  |   |
| 0.0125 | 1   | .   |                           |        |        |        |         |         |   |
| 217    | O   | O   | . LYS LYS LYS A A 27 27 . | 0.2671 | 0.2574 | 0.3310 | 0.0052  | 0.0271  |   |
| 0.0159 | 1   | .   |                           |        |        |        |         |         |   |
| 218    | N   | N   | . GLY GLY GLY A A 28 28 . | 0.1952 | 0.2448 | 0.2586 | -0.0063 | 0.0266  |   |
| 0.0243 | 1   | .   |                           |        |        |        |         |         |   |
| 219    | CA  | CA  | . GLY GLY GLY A A 28 28 . | 0.1716 | 0.2443 | 0.2577 | 0.0136  | 0.0144  |   |
| 0.0370 | 1   | .   |                           |        |        |        |         |         |   |
| 220    | C   | C   | . GLY GLY GLY A A 28 28 . | 0.1625 | 0.2112 | 0.2287 | -0.0077 | 0.0082  |   |
| 0.0193 | 1   | .   |                           |        |        |        |         |         |   |
| 221    | O   | O   | . GLY GLY GLY A A 28 28 . | 0.1329 | 0.1878 | 0.2122 | -0.0113 | 0.0058  |   |
| 0.0246 | 1   | .   |                           |        |        |        |         |         |   |
| 222    | N   | N   | . LEU LEU LEU A A 29 29 . | 0.1616 | 0.2011 | 0.1871 | 0.0029  | 0.0118  |   |
| 0.0308 | 1   | .   |                           |        |        |        |         |         |   |
| 223    | CA  | CA  | . LEU LEU LEU A A 29 29 . | 0.1683 | 0.2014 | 0.1784 | -0.0015 | 0.0107  |   |
| 0.0193 | 1   | .   |                           |        |        |        |         |         |   |
| 224    | CB  | CB  | . LEU LEU LEU A A 29 29 . | 0.2120 | 0.2016 | 0.1835 | 0.0143  | 0.0033  |   |
| 0.0340 | 1   | .   |                           |        |        |        |         |         |   |
| 225    | CG  | CG  | . LEU LEU LEU A A 29 29 . | 0.2561 | 0.3184 | 0.1757 | -0.0507 | 0.0379  |   |
| 0.0369 | 1   | .   |                           |        |        |        |         |         |   |
| 226    | CD1 | CD1 | . LEU LEU LEU A A 29 29 . | 0.3923 | 0.4027 | 0.1860 | 0.0034  | -0.0085 |   |
| 0.0415 | 1   | .   |                           |        |        |        |         |         |   |
| 227    | CD2 | CD2 | . LEU LEU LEU A A 29 29 . | 0.3403 | 0.3424 | 0.2548 | -0.0504 | -0.0101 | - |
| 0.0054 | 1   | .   |                           |        |        |        |         |         |   |
| 228    | C   | C   | . LEU LEU LEU A A 29 29 . | 0.1407 | 0.1515 | 0.1599 | -0.0020 | 0.0098  |   |
| 0.0110 | 1   | .   |                           |        |        |        |         |         |   |
| 229    | O   | O   | . LEU LEU LEU A A 29 29 . | 0.1436 | 0.1406 | 0.1927 | 0.0032  | -0.0065 |   |
| 0.0106 | 1   | .   |                           |        |        |        |         |         |   |
| 230    | N   | N   | . PHE PHE PHE A A 30 30 . | 0.1033 | 0.1184 | 0.1417 | 0.0036  | 0.0153  |   |
| 0.0068 | 1   | .   |                           |        |        |        |         |         |   |
| 231    | CA  | CA  | . PHE PHE PHE A A 30 30 . | 0.0959 | 0.1202 | 0.1532 | -0.0052 | 0.0249  | - |
| 0.0010 | 1   | .   |                           |        |        |        |         |         |   |



|        |     |     |                         |                                         |
|--------|-----|-----|-------------------------|-----------------------------------------|
| 232    | CB  | CB  | . PHE PHE PHE A A 30 30 | . 0.0918 0.1301 0.1268 0.0104 0.0298 -  |
| 0.0143 | 1   | .   |                         |                                         |
| 233    | CG  | CG  | . PHE PHE PHE A A 30 30 | . 0.1055 0.1145 0.1323 0.0097 -0.0028 - |
| 0.0146 | 1   | .   |                         |                                         |
| 234    | CD1 | CD1 | . PHE PHE PHE A A 30 30 | . 0.1076 0.1332 0.1644 0.0256 0.0317 -  |
| 0.0038 | 1   | .   |                         |                                         |
| 235    | CE1 | CE1 | . PHE PHE PHE A A 30 30 | . 0.1504 0.1945 0.1781 0.0260 0.0486 -  |
| 0.0094 | 1   | .   |                         |                                         |
| 236    | CZ  | CZ  | . PHE PHE PHE A A 30 30 | . 0.1752 0.1709 0.1623 0.0067 0.0037 -  |
| 0.0048 | 1   | .   |                         |                                         |
| 237    | CE2 | CE2 | . PHE PHE PHE A A 30 30 | . 0.1381 0.1678 0.1624 0.0132 0.0394 -  |
| 0.0067 | 1   | .   |                         |                                         |
| 238    | CD2 | CD2 | . PHE PHE PHE A A 30 30 | . 0.1119 0.1185 0.1535 -0.0043 0.0434 - |
| 0.0115 | 1   | .   |                         |                                         |
| 239    | C   | C   | . PHE PHE PHE A A 30 30 | . 0.1108 0.1222 0.1636 -0.0002 0.0219 - |
| 0.0052 | 1   | .   |                         |                                         |
| 240    | O   | O   | . PHE PHE PHE A A 30 30 | . 0.1114 0.1607 0.2184 -0.0127 0.0705 - |
| 0.0251 | 1   | .   |                         |                                         |
| 241    | N   | N   | . ARG ARG ARG A A 31 31 | . 0.1050 0.1063 0.1362 -0.0100 0.0176   |
| 0.0175 | 1   | .   |                         |                                         |
| 242    | CA  | CA  | . ARG ARG ARG A A 31 31 | . 0.1029 0.0740 0.0980 0.0016 0.0047    |
| 0.0149 | 1   | .   |                         |                                         |
| 243    | CB  | CB  | . ARG ARG ARG A A 31 31 | . 0.1202 0.0665 0.0994 0.0099 0.0011    |
| 0.0091 | 1   | .   |                         |                                         |
| 244    | CG  | CG  | . ARG ARG ARG A A 31 31 | . 0.1454 0.0876 0.1122 0.0076 0.0009    |
| 0.0344 | 1   | .   |                         |                                         |
| 245    | CD  | CD  | . ARG ARG ARG A A 31 31 | . 0.2192 0.0951 0.1722 -0.0112 -0.0342  |
| 0.0356 | 1   | .   |                         |                                         |
| 246    | NE  | NE  | . ARG ARG ARG A A 31 31 | . 0.1442 0.1549 0.1500 0.0188 -0.0151   |
| 0.0494 | 1   | .   |                         |                                         |
| 247    | CZ  | CZ  | . ARG ARG ARG A A 31 31 | . 0.2061 0.1747 0.2305 0.0069 -0.0200   |
| 0.0218 | 1   | .   |                         |                                         |
| 248    | NH1 | NH1 | . ARG ARG ARG A A 31 31 | . 0.1994 0.2273 0.2329 0.0198 -0.0316   |
| 0.0127 | 1   | .   |                         |                                         |
| 249    | NH2 | NH2 | . ARG ARG ARG A A 31 31 | . 0.2305 0.2771 0.1700 0.0307 -0.0326   |
| 0.0068 | 1   | .   |                         |                                         |
| 250    | C   | C   | . ARG ARG ARG A A 31 31 | . 0.1073 0.0883 0.0983 0.0030 0.0064    |
| 0.0141 | 1   | .   |                         |                                         |
| 251    | O   | O   | . ARG ARG ARG A A 31 31 | . 0.1200 0.0985 0.1204 0.0069 -0.0123 - |
| 0.0026 | 1   | .   |                         |                                         |
| 252    | N   | N   | . ALA ALA ALA A A 32 32 | . 0.0882 0.0931 0.0952 -0.0056 -0.0144  |
| 0.0290 | 1   | .   |                         |                                         |
| 253    | CA  | CA  | . ALA ALA ALA A A 32 32 | . 0.0883 0.1242 0.0881 -0.0145 0.0057   |
| 0.0029 | 1   | .   |                         |                                         |
| 254    | CB  | CB  | . ALA ALA ALA A A 32 32 | . 0.1196 0.1157 0.0879 0.0169 0.0120    |
| 0.0222 | 1   | .   |                         |                                         |
| 255    | C   | C   | . ALA ALA ALA A A 32 32 | . 0.0927 0.1089 0.1025 0.0078 0.0042 -  |
| 0.0111 | 1   | .   |                         |                                         |
| 256    | O   | O   | . ALA ALA ALA A A 32 32 | . 0.1026 0.1190 0.1038 0.0012 0.0183 -  |
| 0.0162 | 1   | .   |                         |                                         |
| 257    | N   | N   | . ALA ALA ALA A A 33 33 | . 0.0703 0.0762 0.0971 -0.0011 0.0266   |
| 0.0191 | 1   | .   |                         |                                         |
| 258    | CA  | CA  | . ALA ALA ALA A A 33 33 | . 0.0943 0.0991 0.0997 0.0123 0.0210    |
| 0.0201 | 1   | .   |                         |                                         |
| 259    | CB  | CB  | . ALA ALA ALA A A 33 33 | . 0.1216 0.0792 0.1141 0.0034 0.0237    |
| 0.0386 | 1   | .   |                         |                                         |
| 260    | C   | C   | . ALA ALA ALA A A 33 33 | . 0.0903 0.0713 0.0799 0.0005 0.0039    |
| 0.0060 | 1   | .   |                         |                                         |
| 261    | O   | O   | . ALA ALA ALA A A 33 33 | . 0.1249 0.1098 0.1209 0.0074 0.0112 -  |
| 0.0291 | 1   | .   |                         |                                         |

|        |     |     |                           |        |        |        |         |         |   |
|--------|-----|-----|---------------------------|--------|--------|--------|---------|---------|---|
| 262    | N   | N   | . VAL VAL VAL A A 34 34 . | 0.0830 | 0.0931 | 0.0742 | 0.0011  | 0.0067  |   |
| 0.0002 | 1   | .   |                           |        |        |        |         |         |   |
| 263    | CA  | CA  | . VAL VAL VAL A A 34 34 . | 0.0925 | 0.0892 | 0.1036 | -0.0034 | 0.0019  | - |
| 0.0043 | 1   | .   |                           |        |        |        |         |         |   |
| 264    | CB  | CB  | . VAL VAL VAL A A 34 34 . | 0.0836 | 0.0763 | 0.1156 | -0.0132 | -0.0026 | - |
| 0.0002 | 1   | .   |                           |        |        |        |         |         |   |
| 265    | CG1 | CG1 | . VAL VAL VAL A A 34 34 . | 0.0936 | 0.0600 | 0.0949 | 0.0326  | -0.0317 | - |
| 0.0003 | 1   | .   |                           |        |        |        |         |         |   |
| 266    | CG2 | CG2 | . VAL VAL VAL A A 34 34 . | 0.0998 | 0.1263 | 0.1047 | -0.0442 | 0.0065  |   |
| 0.0143 | 1   | .   |                           |        |        |        |         |         |   |
| 267    | C   | C   | . VAL VAL VAL A A 34 34 . | 0.0926 | 0.0851 | 0.0945 | -0.0054 | 0.0067  | - |
| 0.0020 | 1   | .   |                           |        |        |        |         |         |   |
| 268    | O   | O   | . VAL VAL VAL A A 34 34 . | 0.1181 | 0.0932 | 0.0853 | 0.0100  | 0.0000  |   |
| 0.0042 | 1   | .   |                           |        |        |        |         |         |   |
| 269    | N   | N   | . PRO PRO PRO A A 35 35 . | 0.0905 | 0.0790 | 0.0782 | -0.0008 | 0.0155  | - |
| 0.0057 | 1   | .   |                           |        |        |        |         |         |   |
| 270    | CA  | CA  | . PRO PRO PRO A A 35 35 . | 0.0818 | 0.0702 | 0.0865 | 0.0036  | 0.0042  | - |
| 0.0098 | 1   | .   |                           |        |        |        |         |         |   |
| 271    | CB  | CB  | . PRO PRO PRO A A 35 35 . | 0.0609 | 0.0426 | 0.0363 | 0.0067  | 0.0115  | - |
| 0.0011 | 1   | .   |                           |        |        |        |         |         |   |
| 272    | CG  | CG  | . PRO PRO PRO A A 35 35 . | 0.0303 | 0.0604 | 0.0766 | -0.0083 | 0.0081  |   |
| 0.0149 | 1   | .   |                           |        |        |        |         |         |   |
| 273    | CD  | CD  | . PRO PRO PRO A A 35 35 . | 0.0974 | 0.0964 | 0.0526 | -0.0177 | -0.0039 | - |
| 0.0003 | 1   | .   |                           |        |        |        |         |         |   |
| 274    | C   | C   | . PRO PRO PRO A A 35 35 . | 0.0802 | 0.0933 | 0.0722 | 0.0065  | -0.0033 |   |
| 0.0034 | 1   | .   |                           |        |        |        |         |         |   |
| 275    | O   | O   | . PRO PRO PRO A A 35 35 . | 0.0775 | 0.0845 | 0.1397 | 0.0016  | 0.0261  | - |
| 0.0068 | 1   | .   |                           |        |        |        |         |         |   |
| 276    | N   | N   | . SER SER SER A A 36 36 . | 0.0639 | 0.0706 | 0.0788 | -0.0016 | 0.0023  |   |
| 0.0022 | 1   | .   |                           |        |        |        |         |         |   |
| 277    | CA  | CA  | . SER SER SER A A 36 36 . | 0.0651 | 0.0755 | 0.1001 | 0.0104  | -0.0026 |   |
| 0.0014 | 1   | .   |                           |        |        |        |         |         |   |
| 278    | CB  | CB  | . SER SER SER A A 36 36 . | 0.0566 | 0.1030 | 0.0905 | 0.0177  | 0.0085  | - |
| 0.0042 | 1   | .   |                           |        |        |        |         |         |   |
| 279    | OG  | OG  | . SER SER SER A A 36 36 . | 0.1023 | 0.1266 | 0.1207 | 0.0256  | 0.0222  | - |
| 0.0148 | 1   | .   |                           |        |        |        |         |         |   |
| 280    | C   | C   | . SER SER SER A A 36 36 . | 0.0746 | 0.0821 | 0.1009 | 0.0083  | 0.0055  |   |
| 0.0066 | 1   | .   |                           |        |        |        |         |         |   |
| 281    | O   | O   | . SER SER SER A A 36 36 . | 0.0721 | 0.0748 | 0.0883 | 0.0250  | 0.0145  | - |
| 0.0002 | 1   | .   |                           |        |        |        |         |         |   |
| 282    | N   | N   | . GLY GLY GLY A A 37 37 . | 0.0681 | 0.0899 | 0.0938 | -0.0022 | -0.0157 |   |
| 0.0044 | 1   | .   |                           |        |        |        |         |         |   |
| 283    | CA  | CA  | . GLY GLY GLY A A 37 37 . | 0.0488 | 0.0784 | 0.1059 | -0.0005 | 0.0033  |   |
| 0.0004 | 1   | .   |                           |        |        |        |         |         |   |
| 284    | C   | C   | . GLY GLY GLY A A 37 37 . | 0.0960 | 0.0898 | 0.1035 | 0.0007  | 0.0009  | - |
| 0.0041 | 1   | .   |                           |        |        |        |         |         |   |
| 285    | O   | O   | . GLY GLY GLY A A 37 37 . | 0.1296 | 0.1469 | 0.1238 | -0.0072 | 0.0035  | - |
| 0.0014 | 1   | .   |                           |        |        |        |         |         |   |
| 286    | N   | N   | . ALA ALA ALA A A 38 38 . | 0.0566 | 0.0987 | 0.1261 | -0.0212 | 0.0162  | - |
| 0.0050 | 1   | .   |                           |        |        |        |         |         |   |
| 287    | CA  | CA  | . ALA ALA ALA A A 38 38 . | 0.0885 | 0.1031 | 0.1042 | -0.0054 | 0.0115  |   |
| 0.0122 | 1   | .   |                           |        |        |        |         |         |   |
| 288    | CB  | CB  | . ALA ALA ALA A A 38 38 . | 0.1101 | 0.1161 | 0.1518 | -0.0346 | 0.0037  |   |
| 0.0255 | 1   | .   |                           |        |        |        |         |         |   |
| 289    | C   | C   | . ALA ALA ALA A A 38 38 . | 0.1002 | 0.1206 | 0.1427 | -0.0011 | 0.0150  | - |
| 0.0103 | 1   | .   |                           |        |        |        |         |         |   |
| 290    | O   | O   | . ALA ALA ALA A A 38 38 . | 0.1186 | 0.1215 | 0.1473 | 0.0446  | 0.0047  | - |
| 0.0246 | 1   | .   |                           |        |        |        |         |         |   |
| 291    | N   | N   | . SER SER SER A A 39 39 . | 0.0742 | 0.1122 | 0.0990 | 0.0008  | 0.0187  | - |
| 0.0026 | 1   | .   |                           |        |        |        |         |         |   |







|        |     |     |                         |                                         |
|--------|-----|-----|-------------------------|-----------------------------------------|
| 382    | OD1 | OD1 | . ASP ASP ASP A A 50 50 | . 0.1569 0.1327 0.1592 0.0060 0.0012    |
| 0.0148 | 1   | .   |                         |                                         |
| 383    | OD2 | OD2 | . ASP ASP ASP A A 50 50 | . 0.1502 0.1302 0.1164 0.0273 -0.0023   |
| 0.0032 | 1   | .   |                         |                                         |
| 384    | C   | C   | . ASP ASP ASP A A 50 50 | . 0.1897 0.1694 0.1597 0.0338 0.0213    |
| 0.0022 | 1   | .   |                         |                                         |
| 385    | O   | O   | . ASP ASP ASP A A 50 50 | . 0.2231 0.1515 0.1937 0.0322 0.0373 -  |
| 0.0059 | 1   | .   |                         |                                         |
| 386    | N   | N   | . GLY GLY GLY A A 51 51 | . 0.1747 0.1918 0.2135 0.0354 0.0155    |
| 0.0114 | 1   | .   |                         |                                         |
| 387    | CA  | CA  | . GLY GLY GLY A A 51 51 | . 0.2167 0.2325 0.2128 0.0477 0.0266    |
| 0.0210 | 1   | .   |                         |                                         |
| 388    | C   | C   | . GLY GLY GLY A A 51 51 | . 0.2301 0.2370 0.2454 0.0436 0.0264    |
| 0.0083 | 1   | .   |                         |                                         |
| 389    | O   | O   | . GLY GLY GLY A A 51 51 | . 0.2596 0.2544 0.2817 0.0801 0.0422    |
| 0.0282 | 1   | .   |                         |                                         |
| 390    | N   | N   | . ASP ASP ASP A A 52 52 | . 0.2358 0.2184 0.2163 0.0389 0.0007    |
| 0.0061 | 1   | .   |                         |                                         |
| 391    | CA  | CA  | . ASP ASP ASP A A 52 52 | . 0.2123 0.2347 0.2291 0.0288 0.0245    |
| 0.0024 | 1   | .   |                         |                                         |
| 392    | CB  | CB  | . ASP ASP ASP A A 52 52 | . 0.2430 0.2520 0.2266 0.0076 0.0088 -  |
| 0.0156 | 1   | .   |                         |                                         |
| 393    | CG  | CG  | . ASP ASP ASP A A 52 52 | . 0.2068 0.2452 0.2296 0.0148 0.0025    |
| 0.0169 | 1   | .   |                         |                                         |
| 394    | OD1 | OD1 | . ASP ASP ASP A A 52 52 | . 0.3136 0.2435 0.1975 0.0361 -0.0363 - |
| 0.0831 | 1   | .   |                         |                                         |
| 395    | OD2 | OD2 | . ASP ASP ASP A A 52 52 | . 0.3101 0.2500 0.2213 0.0764 0.1060    |
| 0.0256 | 1   | .   |                         |                                         |
| 396    | C   | C   | . ASP ASP ASP A A 52 52 | . 0.2420 0.2478 0.2421 0.0290 0.0314    |
| 0.0047 | 1   | .   |                         |                                         |
| 397    | O   | O   | . ASP ASP ASP A A 52 52 | . 0.2284 0.2176 0.1709 0.0359 0.0565    |
| 0.0083 | 1   | .   |                         |                                         |
| 398    | N   | N   | . LYS LYS LYS A A 53 53 | . 0.2660 0.2695 0.2845 0.0064 0.0403    |
| 0.0112 | 1   | .   |                         |                                         |
| 399    | CA  | CA  | . LYS LYS LYS A A 53 53 | . 0.3036 0.3017 0.3219 0.0152 0.0365    |
| 0.0069 | 1   | .   |                         |                                         |
| 400    | CB  | CB  | . LYS LYS LYS A A 53 53 | . 0.2871 0.3063 0.3341 0.0219 0.0354    |
| 0.0178 | 1   | .   |                         |                                         |
| 401    | CG  | CG  | . LYS LYS LYS A A 53 53 | . 0.3349 0.3886 0.3740 -0.0139 0.0251 - |
| 0.0217 | 1   | .   |                         |                                         |
| 402    | CD  | CD  | . LYS LYS LYS A A 53 53 | . 0.3671 0.4172 0.4763 -0.0042 0.0265 - |
| 0.0591 | 1   | .   |                         |                                         |
| 403    | C   | C   | . LYS LYS LYS A A 53 53 | . 0.3147 0.3033 0.3075 0.0275 0.0474    |
| 0.0031 | 1   | .   |                         |                                         |
| 404    | O   | O   | . LYS LYS LYS A A 53 53 | . 0.3558 0.3076 0.3381 0.0557 0.0821    |
| 0.0045 | 1   | .   |                         |                                         |
| 405    | N   | N   | . GLN GLN GLN A A 54 54 | . 0.3288 0.3109 0.3124 0.0505 0.0293    |
| 0.0011 | 1   | .   |                         |                                         |
| 406    | CA  | CA  | . GLN GLN GLN A A 54 54 | . 0.3340 0.3213 0.3015 0.0535 0.0212    |
| 0.0093 | 1   | .   |                         |                                         |
| 407    | CB  | CB  | . GLN GLN GLN A A 54 54 | . 0.3624 0.3443 0.3183 0.0548 0.0050    |
| 0.0117 | 1   | .   |                         |                                         |
| 408    | C   | C   | . GLN GLN GLN A A 54 54 | . 0.3286 0.3226 0.2766 0.0539 0.0209    |
| 0.0095 | 1   | .   |                         |                                         |
| 409    | O   | O   | . GLN GLN GLN A A 54 54 | . 0.3813 0.3266 0.2703 0.0581 0.0421    |
| 0.0267 | 1   | .   |                         |                                         |
| 410    | N   | N   | . ARG ARG ARG A A 55 55 | . 0.2876 0.2673 0.2337 0.0492 0.0428    |
| 0.0218 | 1   | .   |                         |                                         |
| 411    | CA  | CA  | . ARG ARG ARG A A 55 55 | . 0.2467 0.2363 0.2135 0.0179 0.0251    |
| 0.0050 | 1   | .   |                         |                                         |







|        |     |     |                           |        |        |        |         |         |   |
|--------|-----|-----|---------------------------|--------|--------|--------|---------|---------|---|
| 472    | O   | O   | . LEU LEU LEU A A 62 62 . | 0.1243 | 0.1101 | 0.0941 | -0.0148 | 0.0183  |   |
| 0.0077 | 1   | .   |                           |        |        |        |         |         |   |
| 473    | N   | N   | . LYS LYS LYS A A 63 63 . | 0.1353 | 0.1079 | 0.0998 | 0.0051  | -0.0006 | - |
| 0.0054 | 1   | .   |                           |        |        |        |         |         |   |
| 474    | CA  | CA  | . LYS LYS LYS A A 63 63 . | 0.1180 | 0.1157 | 0.0929 | 0.0000  | -0.0028 |   |
| 0.0040 | 1   | .   |                           |        |        |        |         |         |   |
| 475    | CB  | CB  | . LYS LYS LYS A A 63 63 . | 0.1016 | 0.1237 | 0.1057 | 0.0180  | 0.0047  |   |
| 0.0015 | 1   | .   |                           |        |        |        |         |         |   |
| 476    | CG  | CG  | . LYS LYS LYS A A 63 63 . | 0.1325 | 0.1018 | 0.1672 | 0.0042  | 0.0252  |   |
| 0.0057 | 1   | .   |                           |        |        |        |         |         |   |
| 477    | CD  | CD  | . LYS LYS LYS A A 63 63 . | 0.1421 | 0.1417 | 0.1711 | 0.0138  | -0.0227 |   |
| 0.0123 | 1   | .   |                           |        |        |        |         |         |   |
| 478    | CE  | CE  | . LYS LYS LYS A A 63 63 . | 0.2099 | 0.2282 | 0.2471 | 0.0324  | -0.0145 | - |
| 0.0127 | 1   | .   |                           |        |        |        |         |         |   |
| 479    | NZ  | NZ  | . LYS LYS LYS A A 63 63 . | 0.1865 | 0.1888 | 0.3146 | 0.0536  | 0.0410  | - |
| 0.0421 | 1   | .   |                           |        |        |        |         |         |   |
| 480    | C   | C   | . LYS LYS LYS A A 63 63 . | 0.1146 | 0.1033 | 0.1181 | 0.0047  | 0.0063  | - |
| 0.0040 | 1   | .   |                           |        |        |        |         |         |   |
| 481    | O   | O   | . LYS LYS LYS A A 63 63 . | 0.1081 | 0.0958 | 0.1340 | 0.0075  | -0.0098 | - |
| 0.0058 | 1   | .   |                           |        |        |        |         |         |   |
| 482    | N   | N   | . ALA ALA ALA A A 64 64 . | 0.1154 | 0.0985 | 0.1024 | 0.0001  | 0.0067  | - |
| 0.0134 | 1   | .   |                           |        |        |        |         |         |   |
| 483    | CA  | CA  | . ALA ALA ALA A A 64 64 . | 0.1032 | 0.0677 | 0.0978 | 0.0017  | 0.0011  | - |
| 0.0133 | 1   | .   |                           |        |        |        |         |         |   |
| 484    | CB  | CB  | . ALA ALA ALA A A 64 64 . | 0.1132 | 0.0725 | 0.0809 | -0.0106 | -0.0065 | - |
| 0.0158 | 1   | .   |                           |        |        |        |         |         |   |
| 485    | C   | C   | . ALA ALA ALA A A 64 64 . | 0.1124 | 0.0522 | 0.0912 | -0.0020 | 0.0035  | - |
| 0.0122 | 1   | .   |                           |        |        |        |         |         |   |
| 486    | O   | O   | . ALA ALA ALA A A 64 64 . | 0.1075 | 0.0860 | 0.0860 | 0.0057  | 0.0177  | - |
| 0.0229 | 1   | .   |                           |        |        |        |         |         |   |
| 487    | N   | N   | . VAL VAL VAL A A 65 65 . | 0.1143 | 0.0726 | 0.0825 | 0.0070  | -0.0052 | - |
| 0.0069 | 1   | .   |                           |        |        |        |         |         |   |
| 488    | CA  | CA  | . VAL VAL VAL A A 65 65 . | 0.0991 | 0.0756 | 0.0968 | -0.0008 | -0.0032 | - |
| 0.0122 | 1   | .   |                           |        |        |        |         |         |   |
| 489    | CB  | CB  | . VAL VAL VAL A A 65 65 . | 0.1003 | 0.0735 | 0.0998 | 0.0000  | -0.0171 | - |
| 0.0099 | 1   | .   |                           |        |        |        |         |         |   |
| 490    | CG1 | CG1 | . VAL VAL VAL A A 65 65 . | 0.1112 | 0.1294 | 0.1338 | 0.0202  | 0.0059  | - |
| 0.0120 | 1   | .   |                           |        |        |        |         |         |   |
| 491    | CG2 | CG2 | . VAL VAL VAL A A 65 65 . | 0.1411 | 0.0420 | 0.1367 | -0.0098 | -0.0013 | - |
| 0.0247 | 1   | .   |                           |        |        |        |         |         |   |
| 492    | C   | C   | . VAL VAL VAL A A 65 65 . | 0.1102 | 0.0903 | 0.1188 | 0.0028  | 0.0041  |   |
| 0.0058 | 1   | .   |                           |        |        |        |         |         |   |
| 493    | O   | O   | . VAL VAL VAL A A 65 65 . | 0.1080 | 0.0985 | 0.1073 | -0.0091 | -0.0067 |   |
| 0.0036 | 1   | .   |                           |        |        |        |         |         |   |
| 494    | N   | N   | . ASP ASP ASP A A 66 66 . | 0.1253 | 0.0906 | 0.0801 | 0.0028  | 0.0010  |   |
| 0.0051 | 1   | .   |                           |        |        |        |         |         |   |
| 495    | CA  | CA  | . ASP ASP ASP A A 66 66 . | 0.1568 | 0.0994 | 0.1237 | 0.0057  | 0.0148  |   |
| 0.0043 | 1   | .   |                           |        |        |        |         |         |   |
| 496    | CB  | CB  | . ASP ASP ASP A A 66 66 . | 0.1987 | 0.1055 | 0.1241 | 0.0139  | 0.0336  | - |
| 0.0004 | 1   | .   |                           |        |        |        |         |         |   |
| 497    | CG  | CG  | . ASP ASP ASP A A 66 66 . | 0.3070 | 0.2522 | 0.2780 | -0.0461 | 0.0147  | - |
| 0.0069 | 1   | .   |                           |        |        |        |         |         |   |
| 498    | OD1 | OD1 | . ASP ASP ASP A A 66 66 . | 0.3092 | 0.3746 | 0.2070 | -0.1173 | -0.0194 | - |
| 0.0087 | 1   | .   |                           |        |        |        |         |         |   |
| 499    | OD2 | OD2 | . ASP ASP ASP A A 66 66 . | 0.3992 | 0.3453 | 0.4825 | 0.0177  | 0.0035  | - |
| 0.0682 | 1   | .   |                           |        |        |        |         |         |   |
| 500    | C   | C   | . ASP ASP ASP A A 66 66 . | 0.1277 | 0.0985 | 0.1033 | 0.0021  | 0.0028  |   |
| 0.0069 | 1   | .   |                           |        |        |        |         |         |   |
| 501    | O   | O   | . ASP ASP ASP A A 66 66 . | 0.1087 | 0.0993 | 0.1157 | 0.0077  | -0.0010 |   |
| 0.0064 | 1   | .   |                           |        |        |        |         |         |   |











|        |     |     |                           |        |        |        |         |         |   |
|--------|-----|-----|---------------------------|--------|--------|--------|---------|---------|---|
| 652    | O   | O   | . GLU GLU GLU A A 87 87 . | 0.1299 | 0.1527 | 0.1634 | -0.0075 | 0.0143  |   |
| 0.0396 | 1   | .   |                           |        |        |        |         |         |   |
| 653    | N   | N   | . LYS LYS LYS A A 88 88 . | 0.1280 | 0.1294 | 0.1435 | -0.0018 | 0.0133  | - |
| 0.0058 | 1   | .   |                           |        |        |        |         |         |   |
| 654    | CA  | CA  | . LYS LYS LYS A A 88 88 . | 0.1382 | 0.1226 | 0.1285 | -0.0130 | 0.0128  |   |
| 0.0007 | 1   | .   |                           |        |        |        |         |         |   |
| 655    | CB  | CB  | . LYS LYS LYS A A 88 88 . | 0.1586 | 0.1451 | 0.1406 | -0.0220 | 0.0248  |   |
| 0.0049 | 1   | .   |                           |        |        |        |         |         |   |
| 656    | CG  | CG  | . LYS LYS LYS A A 88 88 . | 0.1859 | 0.1906 | 0.1536 | -0.0131 | 0.0504  |   |
| 0.0134 | 1   | .   |                           |        |        |        |         |         |   |
| 657    | CD  | CD  | . LYS LYS LYS A A 88 88 . | 0.1820 | 0.2437 | 0.1590 | -0.0117 | 0.0303  |   |
| 0.0287 | 1   | .   |                           |        |        |        |         |         |   |
| 658    | CE  | CE  | . LYS LYS LYS A A 88 88 . | 0.2766 | 0.3465 | 0.2726 | -0.0377 | 0.0664  |   |
| 0.0230 | 1   | .   |                           |        |        |        |         |         |   |
| 659    | NZ  | NZ  | . LYS LYS LYS A A 88 88 . | 0.3767 | 0.4184 | 0.3529 | -0.0740 | 0.0552  |   |
| 0.0401 | 1   | .   |                           |        |        |        |         |         |   |
| 660    | C   | C   | . LYS LYS LYS A A 88 88 . | 0.1373 | 0.1328 | 0.1352 | 0.0018  | 0.0009  | - |
| 0.0023 | 1   | .   |                           |        |        |        |         |         |   |
| 661    | O   | O   | . LYS LYS LYS A A 88 88 . | 0.1312 | 0.1610 | 0.1370 | 0.0005  | 0.0265  | - |
| 0.0061 | 1   | .   |                           |        |        |        |         |         |   |
| 662    | N   | N   | . LEU LEU LEU A A 89 89 . | 0.1348 | 0.1147 | 0.1284 | -0.0106 | 0.0139  |   |
| 0.0201 | 1   | .   |                           |        |        |        |         |         |   |
| 663    | CA  | CA  | . LEU LEU LEU A A 89 89 . | 0.1135 | 0.1097 | 0.1006 | 0.0057  | -0.0050 | - |
| 0.0006 | 1   | .   |                           |        |        |        |         |         |   |
| 664    | CB  | CB  | . LEU LEU LEU A A 89 89 . | 0.0980 | 0.1147 | 0.1135 | 0.0025  | -0.0086 | - |
| 0.0015 | 1   | .   |                           |        |        |        |         |         |   |
| 665    | CG  | CG  | . LEU LEU LEU A A 89 89 . | 0.0855 | 0.0771 | 0.0827 | 0.0057  | 0.0065  | - |
| 0.0141 | 1   | .   |                           |        |        |        |         |         |   |
| 666    | CD1 | CD1 | . LEU LEU LEU A A 89 89 . | 0.0920 | 0.1322 | 0.1215 | 0.0286  | 0.0155  |   |
| 0.0013 | 1   | .   |                           |        |        |        |         |         |   |
| 667    | CD2 | CD2 | . LEU LEU LEU A A 89 89 . | 0.1741 | 0.1007 | 0.1516 | 0.0063  | 0.0057  | - |
| 0.0134 | 1   | .   |                           |        |        |        |         |         |   |
| 668    | C   | C   | . LEU LEU LEU A A 89 89 . | 0.1422 | 0.1235 | 0.1307 | 0.0006  | 0.0046  |   |
| 0.0001 | 1   | .   |                           |        |        |        |         |         |   |
| 669    | O   | O   | . LEU LEU LEU A A 89 89 . | 0.1462 | 0.1148 | 0.1547 | 0.0039  | 0.0204  |   |
| 0.0047 | 1   | .   |                           |        |        |        |         |         |   |
| 670    | N   | N   | . ASP ASP ASP A A 90 90 . | 0.1292 | 0.1241 | 0.1226 | -0.0022 | -0.0278 |   |
| 0.0095 | 1   | .   |                           |        |        |        |         |         |   |
| 671    | CA  | CA  | . ASP ASP ASP A A 90 90 . | 0.1210 | 0.1321 | 0.1222 | 0.0063  | -0.0045 |   |
| 0.0085 | 1   | .   |                           |        |        |        |         |         |   |
| 672    | CB  | CB  | . ASP ASP ASP A A 90 90 . | 0.1420 | 0.1106 | 0.1089 | 0.0098  | -0.0077 |   |
| 0.0110 | 1   | .   |                           |        |        |        |         |         |   |
| 673    | CG  | CG  | . ASP ASP ASP A A 90 90 . | 0.1524 | 0.1421 | 0.1444 | 0.0031  | -0.0194 |   |
| 0.0038 | 1   | .   |                           |        |        |        |         |         |   |
| 674    | OD1 | OD1 | . ASP ASP ASP A A 90 90 . | 0.1610 | 0.1340 | 0.1378 | 0.0042  | 0.0115  | - |
| 0.0182 | 1   | .   |                           |        |        |        |         |         |   |
| 675    | OD2 | OD2 | . ASP ASP ASP A A 90 90 . | 0.1231 | 0.1196 | 0.1300 | 0.0361  | 0.0070  | - |
| 0.0051 | 1   | .   |                           |        |        |        |         |         |   |
| 676    | C   | C   | . ASP ASP ASP A A 90 90 . | 0.1419 | 0.1247 | 0.1339 | 0.0010  | 0.0103  |   |
| 0.0018 | 1   | .   |                           |        |        |        |         |         |   |
| 677    | O   | O   | . ASP ASP ASP A A 90 90 . | 0.1461 | 0.1288 | 0.1574 | 0.0112  | 0.0192  |   |
| 0.0053 | 1   | .   |                           |        |        |        |         |         |   |
| 678    | N   | N   | . ASN ASN ASN A A 91 91 . | 0.1496 | 0.1343 | 0.1370 | 0.0095  | 0.0111  |   |
| 0.0273 | 1   | .   |                           |        |        |        |         |         |   |
| 679    | CA  | CA  | . ASN ASN ASN A A 91 91 . | 0.1660 | 0.1372 | 0.1592 | 0.0116  | 0.0199  |   |
| 0.0062 | 1   | .   |                           |        |        |        |         |         |   |
| 680    | CB  | CB  | . ASN ASN ASN A A 91 91 . | 0.2061 | 0.1768 | 0.1549 | 0.0154  | 0.0145  |   |
| 0.0004 | 1   | .   |                           |        |        |        |         |         |   |
| 681    | CG  | CG  | . ASN ASN ASN A A 91 91 . | 0.2321 | 0.2618 | 0.2070 | -0.0009 | 0.0038  |   |
| 0.0012 | 1   | .   |                           |        |        |        |         |         |   |









|        |     |     |                             |        |        |        |         |         |   |
|--------|-----|-----|-----------------------------|--------|--------|--------|---------|---------|---|
| 772    | N   | N   | . SER SER SER A A 103 103 . | 0.1214 | 0.1328 | 0.1454 | 0.0093  | 0.0010  |   |
| 0.0102 | 1   | .   |                             |        |        |        |         |         |   |
| 773    | CA  | CA  | . SER SER SER A A 103 103 . | 0.1483 | 0.1598 | 0.1766 | 0.0170  | -0.0002 | - |
| 0.0072 | 1   | .   |                             |        |        |        |         |         |   |
| 774    | CB  | CB  | . SER SER SER A A 103 103 . | 0.1574 | 0.1842 | 0.2020 | 0.0286  | -0.0077 |   |
| 0.0070 | 1   | .   |                             |        |        |        |         |         |   |
| 775    | OG  | OG  | . SER SER SER A A 103 103 . | 0.1656 | 0.2151 | 0.2545 | 0.0354  | 0.0002  |   |
| 0.0305 | 1   | .   |                             |        |        |        |         |         |   |
| 776    | C   | C   | . SER SER SER A A 103 103 . | 0.1642 | 0.1576 | 0.1483 | 0.0208  | 0.0074  | - |
| 0.0012 | 1   | .   |                             |        |        |        |         |         |   |
| 777    | O   | O   | . SER SER SER A A 103 103 . | 0.2219 | 0.2096 | 0.1459 | 0.0369  | 0.0338  | - |
| 0.0192 | 1   | .   |                             |        |        |        |         |         |   |
| 778    | N   | N   | . LYS LYS LYS A A 104 104 . | 0.1387 | 0.1393 | 0.1344 | 0.0153  | -0.0058 | - |
| 0.0272 | 1   | .   |                             |        |        |        |         |         |   |
| 779    | CA  | CA  | . LYS LYS LYS A A 104 104 . | 0.1579 | 0.1378 | 0.1595 | 0.0136  | -0.0050 | - |
| 0.0082 | 1   | .   |                             |        |        |        |         |         |   |
| 780    | CB  | CB  | . LYS LYS LYS A A 104 104 . | 0.1872 | 0.1499 | 0.1685 | -0.0080 | -0.0093 | - |
| 0.0106 | 1   | .   |                             |        |        |        |         |         |   |
| 781    | CG  | CG  | . LYS LYS LYS A A 104 104 . | 0.2014 | 0.1613 | 0.1519 | 0.0077  | -0.0319 | - |
| 0.0014 | 1   | .   |                             |        |        |        |         |         |   |
| 782    | CD  | CD  | . LYS LYS LYS A A 104 104 . | 0.2185 | 0.2003 | 0.2376 | -0.0193 | -0.0840 |   |
| 0.0000 | 1   | .   |                             |        |        |        |         |         |   |
| 783    | CE  | CE  | . LYS LYS LYS A A 104 104 . | 0.2695 | 0.2643 | 0.3176 | -0.0320 | -0.0390 |   |
| 0.0448 | 1   | .   |                             |        |        |        |         |         |   |
| 784    | NZ  | NZ  | . LYS LYS LYS A A 104 104 . | 0.2598 | 0.3069 | 0.2732 | 0.0007  | 0.0146  | - |
| 0.0026 | 1   | .   |                             |        |        |        |         |         |   |
| 785    | C   | C   | . LYS LYS LYS A A 104 104 . | 0.1659 | 0.1520 | 0.1541 | 0.0086  | 0.0030  | - |
| 0.0063 | 1   | .   |                             |        |        |        |         |         |   |
| 786    | O   | O   | . LYS LYS LYS A A 104 104 . | 0.1905 | 0.1633 | 0.1648 | 0.0310  | -0.0191 | - |
| 0.0084 | 1   | .   |                             |        |        |        |         |         |   |
| 787    | N   | N   | . PHE PHE PHE A A 105 105 . | 0.1341 | 0.1278 | 0.1723 | 0.0164  | 0.0097  | - |
| 0.0001 | 1   | .   |                             |        |        |        |         |         |   |
| 788    | CA  | CA  | . PHE PHE PHE A A 105 105 . | 0.1331 | 0.1238 | 0.1439 | 0.0036  | 0.0093  | - |
| 0.0006 | 1   | .   |                             |        |        |        |         |         |   |
| 789    | CB  | CB  | . PHE PHE PHE A A 105 105 . | 0.1121 | 0.1372 | 0.1310 | -0.0102 | 0.0117  |   |
| 0.0263 | 1   | .   |                             |        |        |        |         |         |   |
| 790    | CG  | CG  | . PHE PHE PHE A A 105 105 . | 0.1503 | 0.1378 | 0.1550 | -0.0115 | -0.0057 | - |
| 0.0079 | 1   | .   |                             |        |        |        |         |         |   |
| 791    | CD1 | CD1 | . PHE PHE PHE A A 105 105 . | 0.1865 | 0.1567 | 0.1572 | -0.0577 | -0.0022 |   |
| 0.0532 | 1   | .   |                             |        |        |        |         |         |   |
| 792    | CE1 | CE1 | . PHE PHE PHE A A 105 105 . | 0.2579 | 0.1477 | 0.2193 | -0.0568 | -0.0184 |   |
| 0.0055 | 1   | .   |                             |        |        |        |         |         |   |
| 793    | CZ  | CZ  | . PHE PHE PHE A A 105 105 . | 0.2126 | 0.2149 | 0.1621 | 0.0078  | 0.0210  | - |
| 0.0179 | 1   | .   |                             |        |        |        |         |         |   |
| 794    | CE2 | CE2 | . PHE PHE PHE A A 105 105 . | 0.1996 | 0.1530 | 0.1266 | 0.0025  | 0.0024  |   |
| 0.0342 | 1   | .   |                             |        |        |        |         |         |   |
| 795    | CD2 | CD2 | . PHE PHE PHE A A 105 105 . | 0.1477 | 0.1498 | 0.1235 | 0.0127  | -0.0541 |   |
| 0.0175 | 1   | .   |                             |        |        |        |         |         |   |
| 796    | C   | C   | . PHE PHE PHE A A 105 105 . | 0.1345 | 0.1260 | 0.1395 | -0.0079 | -0.0001 |   |
| 0.0081 | 1   | .   |                             |        |        |        |         |         |   |
| 797    | O   | O   | . PHE PHE PHE A A 105 105 . | 0.1375 | 0.1363 | 0.1393 | -0.0045 | 0.0016  |   |
| 0.0077 | 1   | .   |                             |        |        |        |         |         |   |
| 798    | N   | N   | . GLY GLY GLY A A 106 106 . | 0.1259 | 0.1133 | 0.1134 | 0.0020  | 0.0061  | - |
| 0.0136 | 1   | .   |                             |        |        |        |         |         |   |
| 799    | CA  | CA  | . GLY GLY GLY A A 106 106 . | 0.1082 | 0.1047 | 0.1071 | 0.0019  | 0.0024  |   |
| 0.0165 | 1   | .   |                             |        |        |        |         |         |   |
| 800    | C   | C   | . GLY GLY GLY A A 106 106 . | 0.1229 | 0.0917 | 0.1067 | 0.0004  | -0.0015 |   |
| 0.0214 | 1   | .   |                             |        |        |        |         |         |   |
| 801    | O   | O   | . GLY GLY GLY A A 106 106 . | 0.1063 | 0.1177 | 0.1250 | 0.0081  | 0.0069  |   |
| 0.0332 | 1   | .   |                             |        |        |        |         |         |   |





|        |     |     |                   |         |                                          |
|--------|-----|-----|-------------------|---------|------------------------------------------|
| 862    | CA  | CA  | . ALA ALA ALA A A | 116 116 | . 0.1010 0.1224 0.1113 -0.0104 -0.0019 - |
| 0.0089 | 1   | .   |                   |         |                                          |
| 863    | CB  | CB  | . ALA ALA ALA A A | 116 116 | . 0.1362 0.1250 0.1332 -0.0370 0.0072    |
| 0.0049 | 1   | .   |                   |         |                                          |
| 864    | C   | C   | . ALA ALA ALA A A | 116 116 | . 0.1293 0.1192 0.1180 -0.0052 -0.0040   |
| 0.0068 | 1   | .   |                   |         |                                          |
| 865    | O   | O   | . ALA ALA ALA A A | 116 116 | . 0.1072 0.1106 0.1145 0.0066 0.0060     |
| 0.0157 | 1   | .   |                   |         |                                          |
| 866    | N   | N   | . VAL VAL VAL A A | 117 117 | . 0.1287 0.0968 0.1127 -0.0027 0.0089    |
| 0.0018 | 1   | .   |                   |         |                                          |
| 867    | CA  | CA  | . VAL VAL VAL A A | 117 117 | . 0.0916 0.0918 0.0854 -0.0098 0.0177 -  |
| 0.0008 | 1   | .   |                   |         |                                          |
| 868    | CB  | CB  | . VAL VAL VAL A A | 117 117 | . 0.0733 0.0821 0.1025 -0.0176 0.0346    |
| 0.0045 | 1   | .   |                   |         |                                          |
| 869    | CG1 | CG1 | . VAL VAL VAL A A | 117 117 | . 0.1084 0.1374 0.0981 -0.0330 0.0137    |
| 0.0302 | 1   | .   |                   |         |                                          |
| 870    | CG2 | CG2 | . VAL VAL VAL A A | 117 117 | . 0.1137 0.1259 0.0961 -0.0316 0.0306 -  |
| 0.0072 | 1   | .   |                   |         |                                          |
| 871    | C   | C   | . VAL VAL VAL A A | 117 117 | . 0.1026 0.1029 0.1041 -0.0117 0.0145 -  |
| 0.0063 | 1   | .   |                   |         |                                          |
| 872    | O   | O   | . VAL VAL VAL A A | 117 117 | . 0.1199 0.0908 0.1417 0.0005 0.0049 -   |
| 0.0067 | 1   | .   |                   |         |                                          |
| 873    | N   | N   | . CYS CYS CYS A A | 118 118 | . 0.1464 0.1191 0.1197 -0.0139 0.0175    |
| 0.0059 | 1   | .   |                   |         |                                          |
| 874    | CA  | CA  | . CYS CYS CYS A A | 118 118 | . 0.1109 0.1024 0.1160 -0.0150 0.0130    |
| 0.0098 | 1   | .   |                   |         |                                          |
| 875    | CB  | CB  | . CYS CYS CYS A A | 118 118 | . 0.1467 0.1076 0.1035 -0.0220 0.0001    |
| 0.0127 | 1   | .   |                   |         |                                          |
| 876    | SG  | SG  | . CYS CYS CYS A A | 118 118 | . 0.1305 0.1530 0.1395 -0.0026 0.0216 -  |
| 0.0116 | 1   | .   |                   |         |                                          |
| 877    | C   | C   | . CYS CYS CYS A A | 118 118 | . 0.1296 0.1149 0.1293 -0.0103 0.0208    |
| 0.0087 | 1   | .   |                   |         |                                          |
| 878    | O   | O   | . CYS CYS CYS A A | 118 118 | . 0.1074 0.1081 0.1116 -0.0007 0.0384    |
| 0.0219 | 1   | .   |                   |         |                                          |
| 879    | N   | N   | . LYS LYS LYS A A | 119 119 | . 0.1130 0.1108 0.0940 0.0024 0.0044 -   |
| 0.0110 | 1   | .   |                   |         |                                          |
| 880    | CA  | CA  | . LYS LYS LYS A A | 119 119 | . 0.1047 0.1042 0.1243 -0.0063 0.0054 -  |
| 0.0020 | 1   | .   |                   |         |                                          |
| 881    | CB  | CB  | . LYS LYS LYS A A | 119 119 | . 0.0873 0.1179 0.1137 -0.0155 0.0129 -  |
| 0.0039 | 1   | .   |                   |         |                                          |
| 882    | CG  | CG  | . LYS LYS LYS A A | 119 119 | . 0.0819 0.1395 0.0882 -0.0442 0.0109    |
| 0.0135 | 1   | .   |                   |         |                                          |
| 883    | CD  | CD  | . LYS LYS LYS A A | 119 119 | . 0.1542 0.1399 0.1097 -0.0484 0.0344    |
| 0.0091 | 1   | .   |                   |         |                                          |
| 884    | CE  | CE  | . LYS LYS LYS A A | 119 119 | . 0.1735 0.2066 0.1306 -0.0692 0.0126    |
| 0.0251 | 1   | .   |                   |         |                                          |
| 885    | NZ  | NZ  | . LYS LYS LYS A A | 119 119 | . 0.2144 0.1372 0.1205 -0.0536 0.0261    |
| 0.0356 | 1   | .   |                   |         |                                          |
| 886    | C   | C   | . LYS LYS LYS A A | 119 119 | . 0.1150 0.1175 0.1341 -0.0025 -0.0011 - |
| 0.0054 | 1   | .   |                   |         |                                          |
| 887    | O   | O   | . LYS LYS LYS A A | 119 119 | . 0.1391 0.1424 0.1210 0.0011 0.0316 -   |
| 0.0070 | 1   | .   |                   |         |                                          |
| 888    | N   | N   | . ALA ALA ALA A A | 120 120 | . 0.1066 0.1266 0.1461 -0.0300 -0.0015 - |
| 0.0060 | 1   | .   |                   |         |                                          |
| 889    | CA  | CA  | . ALA ALA ALA A A | 120 120 | . 0.0847 0.1106 0.1352 -0.0173 -0.0064 - |
| 0.0057 | 1   | .   |                   |         |                                          |
| 890    | CB  | CB  | . ALA ALA ALA A A | 120 120 | . 0.0859 0.1028 0.1394 0.0117 0.0032 -   |
| 0.0109 | 1   | .   |                   |         |                                          |
| 891    | C   | C   | . ALA ALA ALA A A | 120 120 | . 0.0809 0.0960 0.1223 -0.0041 -0.0030   |
| 0.0010 | 1   | .   |                   |         |                                          |







|        |     |     |                             |        |        |        |         |         |   |
|--------|-----|-----|-----------------------------|--------|--------|--------|---------|---------|---|
| 952    | CA  | CA  | . LEU LEU LEU A A 129 129 . | 0.1044 | 0.1344 | 0.1364 | 0.0138  | 0.0142  |   |
| 0.0019 | 1   | .   |                             |        |        |        |         |         |   |
| 953    | CB  | CB  | . LEU LEU LEU A A 129 129 . | 0.0934 | 0.0949 | 0.1123 | 0.0227  | 0.0181  | - |
| 0.0082 | 1   | .   |                             |        |        |        |         |         |   |
| 954    | CG  | CG  | . LEU LEU LEU A A 129 129 . | 0.0571 | 0.0824 | 0.1121 | 0.0199  | 0.0408  |   |
| 0.0102 | 1   | .   |                             |        |        |        |         |         |   |
| 955    | CD1 | CD1 | . LEU LEU LEU A A 129 129 . | 0.1196 | 0.1093 | 0.1208 | -0.0065 | 0.0330  |   |
| 0.0191 | 1   | .   |                             |        |        |        |         |         |   |
| 956    | CD2 | CD2 | . LEU LEU LEU A A 129 129 . | 0.1438 | 0.1241 | 0.0569 | -0.0061 | -0.0066 |   |
| 0.0102 | 1   | .   |                             |        |        |        |         |         |   |
| 957    | C   | C   | . LEU LEU LEU A A 129 129 . | 0.0895 | 0.1198 | 0.1202 | 0.0101  | 0.0218  | - |
| 0.0030 | 1   | .   |                             |        |        |        |         |         |   |
| 958    | O   | O   | . LEU LEU LEU A A 129 129 . | 0.1225 | 0.0943 | 0.1199 | 0.0118  | 0.0206  | - |
| 0.0022 | 1   | .   |                             |        |        |        |         |         |   |
| 959    | N   | N   | . TYR TYR TYR A A 130 130 . | 0.0911 | 0.1185 | 0.1298 | 0.0133  | 0.0148  |   |
| 0.0020 | 1   | .   |                             |        |        |        |         |         |   |
| 960    | CA  | CA  | . TYR TYR TYR A A 130 130 . | 0.1074 | 0.1005 | 0.1258 | -0.0047 | 0.0181  | - |
| 0.0036 | 1   | .   |                             |        |        |        |         |         |   |
| 961    | CB  | CB  | . TYR TYR TYR A A 130 130 . | 0.1387 | 0.1027 | 0.1520 | 0.0069  | 0.0215  |   |
| 0.0116 | 1   | .   |                             |        |        |        |         |         |   |
| 962    | CG  | CG  | . TYR TYR TYR A A 130 130 . | 0.1249 | 0.1519 | 0.1228 | 0.0134  | 0.0042  |   |
| 0.0233 | 1   | .   |                             |        |        |        |         |         |   |
| 963    | CD1 | CD1 | . TYR TYR TYR A A 130 130 . | 0.1399 | 0.1345 | 0.2017 | 0.0251  | 0.0100  |   |
| 0.0329 | 1   | .   |                             |        |        |        |         |         |   |
| 964    | CE1 | CE1 | . TYR TYR TYR A A 130 130 . | 0.1470 | 0.1036 | 0.1962 | 0.0131  | 0.0278  |   |
| 0.0012 | 1   | .   |                             |        |        |        |         |         |   |
| 965    | CZ  | CZ  | . TYR TYR TYR A A 130 130 . | 0.1152 | 0.1111 | 0.1745 | -0.0084 | 0.0018  | - |
| 0.0194 | 1   | .   |                             |        |        |        |         |         |   |
| 966    | OH  | OH  | . TYR TYR TYR A A 130 130 . | 0.1922 | 0.1227 | 0.3069 | 0.0429  | -0.0139 | - |
| 0.0363 | 1   | .   |                             |        |        |        |         |         |   |
| 967    | CE2 | CE2 | . TYR TYR TYR A A 130 130 . | 0.1212 | 0.1117 | 0.1925 | -0.0049 | -0.0064 |   |
| 0.0180 | 1   | .   |                             |        |        |        |         |         |   |
| 968    | CD2 | CD2 | . TYR TYR TYR A A 130 130 . | 0.1109 | 0.0834 | 0.1882 | 0.0147  | -0.0089 |   |
| 0.0774 | 1   | .   |                             |        |        |        |         |         |   |
| 969    | C   | C   | . TYR TYR TYR A A 130 130 . | 0.1101 | 0.1183 | 0.1179 | 0.0052  | 0.0040  |   |
| 0.0066 | 1   | .   |                             |        |        |        |         |         |   |
| 970    | O   | O   | . TYR TYR TYR A A 130 130 . | 0.1382 | 0.1137 | 0.1084 | 0.0113  | 0.0155  |   |
| 0.0049 | 1   | .   |                             |        |        |        |         |         |   |
| 971    | N   | N   | . ARG ARG ARG A A 131 131 . | 0.1036 | 0.1098 | 0.1308 | 0.0090  | 0.0172  |   |
| 0.0023 | 1   | .   |                             |        |        |        |         |         |   |
| 972    | CA  | CA  | . ARG ARG ARG A A 131 131 . | 0.1072 | 0.1239 | 0.1550 | 0.0052  | 0.0148  |   |
| 0.0164 | 1   | .   |                             |        |        |        |         |         |   |
| 973    | CB  | CB  | . ARG ARG ARG A A 131 131 . | 0.1321 | 0.1676 | 0.2029 | 0.0365  | 0.0027  | - |
| 0.0181 | 1   | .   |                             |        |        |        |         |         |   |
| 974    | CG  | CG  | . ARG ARG ARG A A 131 131 . | 0.3089 | 0.2926 | 0.2865 | 0.0066  | 0.0226  | - |
| 0.0021 | 1   | .   |                             |        |        |        |         |         |   |
| 975    | CD  | CD  | . ARG ARG ARG A A 131 131 . | 0.3922 | 0.4938 | 0.3609 | -0.0115 | 0.0823  |   |
| 0.0111 | 1   | .   |                             |        |        |        |         |         |   |
| 976    | NE  | NE  | . ARG ARG ARG A A 131 131 . | 0.4444 | 0.5022 | 0.4362 | -0.0487 | 0.0526  | - |
| 0.0373 | 1   | .   |                             |        |        |        |         |         |   |
| 977    | CZ  | CZ  | . ARG ARG ARG A A 131 131 . | 0.4513 | 0.5110 | 0.4508 | -0.0207 | 0.0472  | - |
| 0.0443 | 1   | .   |                             |        |        |        |         |         |   |
| 978    | NH1 | NH1 | . ARG ARG ARG A A 131 131 . | 0.3994 | 0.4771 | 0.4487 | -0.0369 | 0.0663  | - |
| 0.0467 | 1   | .   |                             |        |        |        |         |         |   |
| 979    | NH2 | NH2 | . ARG ARG ARG A A 131 131 . | 0.3935 | 0.4701 | 0.5044 | -0.0498 | 0.0689  | - |
| 0.0515 | 1   | .   |                             |        |        |        |         |         |   |
| 980    | C   | C   | . ARG ARG ARG A A 131 131 . | 0.1137 | 0.1289 | 0.1268 | 0.0019  | 0.0164  |   |
| 0.0036 | 1   | .   |                             |        |        |        |         |         |   |
| 981    | O   | O   | . ARG ARG ARG A A 131 131 . | 0.1223 | 0.1247 | 0.1201 | 0.0000  | 0.0188  |   |
| 0.0252 | 1   | .   |                             |        |        |        |         |         |   |



|        |     |     |                             |        |        |        |         |         |   |
|--------|-----|-----|-----------------------------|--------|--------|--------|---------|---------|---|
| 1012   | C   | C   | . GLN GLN GLN A A 135 135 . | 0.1427 | 0.1469 | 0.1436 | 0.0051  | 0.0217  |   |
| 0.0238 | 1   | .   |                             |        |        |        |         |         |   |
| 1013   | O   | O   | . GLN GLN GLN A A 135 135 . | 0.1583 | 0.1652 | 0.1290 | 0.0115  | 0.0317  |   |
| 0.0443 | 1   | .   |                             |        |        |        |         |         |   |
| 1014   | N   | N   | . LEU LEU LEU A A 136 136 . | 0.1475 | 0.1163 | 0.1507 | 0.0053  | 0.0267  |   |
| 0.0197 | 1   | .   |                             |        |        |        |         |         |   |
| 1015   | CA  | CA  | . LEU LEU LEU A A 136 136 . | 0.1599 | 0.1588 | 0.1450 | 0.0076  | 0.0236  |   |
| 0.0126 | 1   | .   |                             |        |        |        |         |         |   |
| 1016   | CB  | CB  | . LEU LEU LEU A A 136 136 . | 0.1469 | 0.1291 | 0.0777 | -0.0035 | 0.0202  |   |
| 0.0237 | 1   | .   |                             |        |        |        |         |         |   |
| 1017   | CG  | CG  | . LEU LEU LEU A A 136 136 . | 0.1401 | 0.1233 | 0.1232 | -0.0276 | 0.0479  | - |
| 0.0228 | 1   | .   |                             |        |        |        |         |         |   |
| 1018   | CD1 | CD1 | . LEU LEU LEU A A 136 136 . | 0.0897 | 0.1317 | 0.1043 | -0.0177 | 0.0318  |   |
| 0.0238 | 1   | .   |                             |        |        |        |         |         |   |
| 1019   | CD2 | CD2 | . LEU LEU LEU A A 136 136 . | 0.1582 | 0.1279 | 0.1527 | -0.0323 | 0.0681  |   |
| 0.0310 | 1   | .   |                             |        |        |        |         |         |   |
| 1020   | C   | C   | . LEU LEU LEU A A 136 136 . | 0.1855 | 0.1728 | 0.1487 | 0.0133  | 0.0047  |   |
| 0.0187 | 1   | .   |                             |        |        |        |         |         |   |
| 1021   | O   | O   | . LEU LEU LEU A A 136 136 . | 0.2163 | 0.1635 | 0.1602 | 0.0385  | -0.0029 |   |
| 0.0206 | 1   | .   |                             |        |        |        |         |         |   |
| 1022   | N   | N   | . ALA ALA ALA A A 137 137 . | 0.1555 | 0.1484 | 0.1400 | -0.0100 | 0.0036  |   |
| 0.0100 | 1   | .   |                             |        |        |        |         |         |   |
| 1023   | CA  | CA  | . ALA ALA ALA A A 137 137 . | 0.1788 | 0.1763 | 0.1318 | 0.0039  | -0.0002 |   |
| 0.0187 | 1   | .   |                             |        |        |        |         |         |   |
| 1024   | CB  | CB  | . ALA ALA ALA A A 137 137 . | 0.1662 | 0.1553 | 0.1378 | -0.0078 | -0.0224 | - |
| 0.0307 | 1   | .   |                             |        |        |        |         |         |   |
| 1025   | C   | C   | . ALA ALA ALA A A 137 137 . | 0.1895 | 0.1801 | 0.1557 | 0.0005  | -0.0065 |   |
| 0.0043 | 1   | .   |                             |        |        |        |         |         |   |
| 1026   | O   | O   | . ALA ALA ALA A A 137 137 . | 0.2091 | 0.2406 | 0.1851 | 0.0182  | 0.0045  |   |
| 0.0196 | 1   | .   |                             |        |        |        |         |         |   |
| 1027   | N   | N   | . GLY GLY GLY A A 138 138 . | 0.1944 | 0.1616 | 0.1631 | 0.0097  | 0.0176  |   |
| 0.0262 | 1   | .   |                             |        |        |        |         |         |   |
| 1028   | CA  | CA  | . GLY GLY GLY A A 138 138 . | 0.2669 | 0.2304 | 0.2177 | 0.0011  | 0.0058  | - |
| 0.0009 | 1   | .   |                             |        |        |        |         |         |   |
| 1029   | C   | C   | . GLY GLY GLY A A 138 138 . | 0.2918 | 0.2528 | 0.2389 | -0.0066 | 0.0108  |   |
| 0.0048 | 1   | .   |                             |        |        |        |         |         |   |
| 1030   | O   | O   | . GLY GLY GLY A A 138 138 . | 0.3278 | 0.3048 | 0.2537 | -0.0045 | 0.0040  |   |
| 0.0129 | 1   | .   |                             |        |        |        |         |         |   |
| 1031   | N   | N   | . ASN ASN ASN A A 139 139 . | 0.2539 | 0.2703 | 0.2165 | 0.0081  | 0.0157  |   |
| 0.0117 | 1   | .   |                             |        |        |        |         |         |   |
| 1032   | CA  | CA  | . ASN ASN ASN A A 139 139 . | 0.2608 | 0.2610 | 0.2339 | -0.0108 | 0.0216  |   |
| 0.0120 | 1   | .   |                             |        |        |        |         |         |   |
| 1033   | CB  | CB  | . ASN ASN ASN A A 139 139 . | 0.2577 | 0.2901 | 0.2446 | -0.0148 | 0.0191  |   |
| 0.0203 | 1   | .   |                             |        |        |        |         |         |   |
| 1034   | CG  | CG  | . ASN ASN ASN A A 139 139 . | 0.2517 | 0.2756 | 0.2228 | -0.0065 | 0.0354  |   |
| 0.0359 | 1   | .   |                             |        |        |        |         |         |   |
| 1035   | OD1 | OD1 | . ASN ASN ASN A A 139 139 . | 0.2929 | 0.3908 | 0.1844 | -0.0317 | 0.0369  |   |
| 0.0580 | 1   | .   |                             |        |        |        |         |         |   |
| 1036   | ND2 | ND2 | . ASN ASN ASN A A 139 139 . | 0.2117 | 0.2259 | 0.1510 | -0.0034 | 0.0155  |   |
| 0.0255 | 1   | .   |                             |        |        |        |         |         |   |
| 1037   | C   | C   | . ASN ASN ASN A A 139 139 . | 0.2834 | 0.2971 | 0.2754 | 0.0010  | 0.0177  |   |
| 0.0020 | 1   | .   |                             |        |        |        |         |         |   |
| 1038   | O   | O   | . ASN ASN ASN A A 139 139 . | 0.2622 | 0.3014 | 0.3023 | 0.0259  | 0.0411  | - |
| 0.0123 | 1   | .   |                             |        |        |        |         |         |   |
| 1039   | N   | N   | . SER SER SER A A 140 140 . | 0.3313 | 0.3111 | 0.3192 | 0.0084  | 0.0103  | - |
| 0.0121 | 1   | .   |                             |        |        |        |         |         |   |
| 1040   | CA  | CA  | . SER SER SER A A 140 140 . | 0.3773 | 0.3838 | 0.3776 | 0.0081  | 0.0014  | - |
| 0.0027 | 1   | .   |                             |        |        |        |         |         |   |
| 1041   | CB  | CB  | . SER SER SER A A 140 140 . | 0.3812 | 0.3712 | 0.3857 | 0.0045  | 0.0166  |   |
| 0.0063 | 1   | .   |                             |        |        |        |         |         |   |

|        |     |     |                             |        |        |        |         |         |   |
|--------|-----|-----|-----------------------------|--------|--------|--------|---------|---------|---|
| 1042   | OG  | OG  | . SER SER SER A A 140 140 . | 0.4789 | 0.4517 | 0.4535 | 0.0051  | 0.0181  |   |
| 0.0388 | 1   | .   |                             |        |        |        |         |         |   |
| 1043   | C   | C   | . SER SER SER A A 140 140 . | 0.3997 | 0.3946 | 0.3841 | 0.0141  | -0.0078 | - |
| 0.0004 | 1   | .   |                             |        |        |        |         |         |   |
| 1044   | O   | O   | . SER SER SER A A 140 140 . | 0.4232 | 0.4546 | 0.4532 | 0.0376  | -0.0157 | - |
| 0.0216 | 1   | .   |                             |        |        |        |         |         |   |
| 1045   | N   | N   | . ASP ASP ASP A A 141 141 . | 0.3779 | 0.4024 | 0.3823 | 0.0041  | -0.0061 |   |
| 0.0011 | 1   | .   |                             |        |        |        |         |         |   |
| 1046   | CA  | CA  | . ASP ASP ASP A A 141 141 . | 0.3939 | 0.4012 | 0.3783 | -0.0106 | 0.0040  |   |
| 0.0121 | 1   | .   |                             |        |        |        |         |         |   |
| 1047   | CB  | CB  | . ASP ASP ASP A A 141 141 . | 0.4131 | 0.4136 | 0.3961 | -0.0146 | -0.0035 |   |
| 0.0024 | 1   | .   |                             |        |        |        |         |         |   |
| 1048   | CG  | CG  | . ASP ASP ASP A A 141 141 . | 0.4588 | 0.4555 | 0.4196 | -0.0021 | 0.0107  | - |
| 0.0060 | 1   | .   |                             |        |        |        |         |         |   |
| 1049   | OD1 | OD1 | . ASP ASP ASP A A 141 141 . | 0.4599 | 0.4492 | 0.4392 | -0.0219 | 0.0307  | - |
| 0.0480 | 1   | .   |                             |        |        |        |         |         |   |
| 1050   | OD2 | OD2 | . ASP ASP ASP A A 141 141 . | 0.5582 | 0.5328 | 0.4856 | -0.0039 | -0.0551 |   |
| 0.0338 | 1   | .   |                             |        |        |        |         |         |   |
| 1051   | C   | C   | . ASP ASP ASP A A 141 141 . | 0.3617 | 0.3923 | 0.3670 | -0.0093 | -0.0020 |   |
| 0.0141 | 1   | .   |                             |        |        |        |         |         |   |
| 1052   | O   | O   | . ASP ASP ASP A A 141 141 . | 0.4021 | 0.4192 | 0.3835 | -0.0113 | -0.0177 |   |
| 0.0163 | 1   | .   |                             |        |        |        |         |         |   |
| 1053   | N   | N   | . LEU LEU LEU A A 142 142 . | 0.3067 | 0.3333 | 0.2952 | -0.0243 | -0.0005 |   |
| 0.0069 | 1   | .   |                             |        |        |        |         |         |   |
| 1054   | CA  | CA  | . LEU LEU LEU A A 142 142 . | 0.2406 | 0.2553 | 0.2617 | -0.0213 | 0.0122  |   |
| 0.0122 | 1   | .   |                             |        |        |        |         |         |   |
| 1055   | CB  | CB  | . LEU LEU LEU A A 142 142 . | 0.2306 | 0.2492 | 0.2341 | -0.0372 | 0.0346  | - |
| 0.0148 | 1   | .   |                             |        |        |        |         |         |   |
| 1056   | CG  | CG  | . LEU LEU LEU A A 142 142 . | 0.2503 | 0.2655 | 0.2797 | -0.0050 | 0.0455  | - |
| 0.0102 | 1   | .   |                             |        |        |        |         |         |   |
| 1057   | CD1 | CD1 | . LEU LEU LEU A A 142 142 . | 0.2578 | 0.3156 | 0.2536 | -0.0122 | 0.0437  | - |
| 0.0085 | 1   | .   |                             |        |        |        |         |         |   |
| 1058   | CD2 | CD2 | . LEU LEU LEU A A 142 142 . | 0.2058 | 0.1778 | 0.2924 | -0.0016 | 0.1179  | - |
| 0.0354 | 1   | .   |                             |        |        |        |         |         |   |
| 1059   | C   | C   | . LEU LEU LEU A A 142 142 . | 0.2275 | 0.2391 | 0.2270 | -0.0136 | 0.0052  |   |
| 0.0115 | 1   | .   |                             |        |        |        |         |         |   |
| 1060   | O   | O   | . LEU LEU LEU A A 142 142 . | 0.2258 | 0.2491 | 0.1650 | -0.0333 | 0.0384  |   |
| 0.0138 | 1   | .   |                             |        |        |        |         |         |   |
| 1061   | N   | N   | . ILE ILE ILE A A 143 143 . | 0.2108 | 0.2086 | 0.2027 | -0.0178 | 0.0172  |   |
| 0.0331 | 1   | .   |                             |        |        |        |         |         |   |
| 1062   | CA  | CA  | . ILE ILE ILE A A 143 143 . | 0.2131 | 0.2247 | 0.1924 | -0.0127 | 0.0038  |   |
| 0.0189 | 1   | .   |                             |        |        |        |         |         |   |
| 1063   | CB  | CB  | . ILE ILE ILE A A 143 143 . | 0.2374 | 0.2973 | 0.2109 | -0.0041 | 0.0193  |   |
| 0.0396 | 1   | .   |                             |        |        |        |         |         |   |
| 1064   | CG1 | CG1 | . ILE ILE ILE A A 143 143 . | 0.2469 | 0.2803 | 0.1996 | 0.0118  | 0.0115  |   |
| 0.0470 | 1   | .   |                             |        |        |        |         |         |   |
| 1065   | CD1 | CD1 | . ILE ILE ILE A A 143 143 . | 0.2684 | 0.1746 | 0.2778 | -0.0782 | -0.0384 |   |
| 0.0277 | 1   | .   |                             |        |        |        |         |         |   |
| 1066   | CG2 | CG2 | . ILE ILE ILE A A 143 143 . | 0.2838 | 0.3012 | 0.2175 | -0.0416 | 0.0469  |   |
| 0.0479 | 1   | .   |                             |        |        |        |         |         |   |
| 1067   | C   | C   | . ILE ILE ILE A A 143 143 . | 0.1586 | 0.1726 | 0.1925 | -0.0133 | 0.0056  |   |
| 0.0168 | 1   | .   |                             |        |        |        |         |         |   |
| 1068   | O   | O   | . ILE ILE ILE A A 143 143 . | 0.1712 | 0.2086 | 0.1849 | -0.0025 | 0.0059  |   |
| 0.0218 | 1   | .   |                             |        |        |        |         |         |   |
| 1069   | N   | N   | . LEU LEU LEU A A 144 144 . | 0.1422 | 0.1443 | 0.1466 | -0.0103 | 0.0048  |   |
| 0.0113 | 1   | .   |                             |        |        |        |         |         |   |
| 1070   | CA  | CA  | . LEU LEU LEU A A 144 144 . | 0.1045 | 0.1161 | 0.1252 | -0.0026 | -0.0056 | - |
| 0.0016 | 1   | .   |                             |        |        |        |         |         |   |
| 1071   | CB  | CB  | . LEU LEU LEU A A 144 144 . | 0.0926 | 0.1065 | 0.0856 | 0.0191  | -0.0202 | - |
| 0.0020 | 1   | .   |                             |        |        |        |         |         |   |

|        |     |     |                             |        |        |        |         |         |   |
|--------|-----|-----|-----------------------------|--------|--------|--------|---------|---------|---|
| 1072   | CG  | CG  | . LEU LEU LEU A A 144 144 . | 0.1095 | 0.1370 | 0.1295 | 0.0061  | -0.0226 |   |
| 0.0190 | 1   | .   |                             |        |        |        |         |         |   |
| 1073   | CD1 | CD1 | . LEU LEU LEU A A 144 144 . | 0.1955 | 0.1246 | 0.1259 | 0.0089  | 0.0129  |   |
| 0.0376 | 1   | .   |                             |        |        |        |         |         |   |
| 1074   | CD2 | CD2 | . LEU LEU LEU A A 144 144 . | 0.2464 | 0.1941 | 0.1844 | -0.0320 | 0.0275  |   |
| 0.0437 | 1   | .   |                             |        |        |        |         |         |   |
| 1075   | C   | C   | . LEU LEU LEU A A 144 144 . | 0.0894 | 0.1123 | 0.1074 | 0.0034  | -0.0065 | - |
| 0.0022 | 1   | .   |                             |        |        |        |         |         |   |
| 1076   | O   | O   | . LEU LEU LEU A A 144 144 . | 0.1092 | 0.1336 | 0.1140 | 0.0116  | 0.0000  | - |
| 0.0275 | 1   | .   |                             |        |        |        |         |         |   |
| 1077   | N   | N   | . PRO PRO PRO A A 145 145 . | 0.0841 | 0.1049 | 0.0924 | 0.0105  | -0.0001 | - |
| 0.0188 | 1   | .   |                             |        |        |        |         |         |   |
| 1078   | CA  | CA  | . PRO PRO PRO A A 145 145 . | 0.0863 | 0.0911 | 0.0732 | 0.0003  | 0.0038  | - |
| 0.0239 | 1   | .   |                             |        |        |        |         |         |   |
| 1079   | CB  | CB  | . PRO PRO PRO A A 145 145 . | 0.0918 | 0.1013 | 0.0726 | -0.0010 | 0.0080  | - |
| 0.0110 | 1   | .   |                             |        |        |        |         |         |   |
| 1080   | CG  | CG  | . PRO PRO PRO A A 145 145 . | 0.0580 | 0.0896 | 0.1116 | 0.0181  | 0.0101  | - |
| 0.0043 | 1   | .   |                             |        |        |        |         |         |   |
| 1081   | CD  | CD  | . PRO PRO PRO A A 145 145 . | 0.0549 | 0.1079 | 0.0871 | 0.0004  | 0.0000  | - |
| 0.0149 | 1   | .   |                             |        |        |        |         |         |   |
| 1082   | C   | C   | . PRO PRO PRO A A 145 145 . | 0.1057 | 0.1250 | 0.0873 | -0.0008 | 0.0000  | - |
| 0.0140 | 1   | .   |                             |        |        |        |         |         |   |
| 1083   | O   | O   | . PRO PRO PRO A A 145 145 . | 0.1001 | 0.1137 | 0.1108 | 0.0095  | -0.0065 | - |
| 0.0128 | 1   | .   |                             |        |        |        |         |         |   |
| 1084   | N   | N   | . VAL VAL VAL A A 146 146 . | 0.0774 | 0.1189 | 0.0742 | -0.0004 | -0.0029 | - |
| 0.0153 | 1   | .   |                             |        |        |        |         |         |   |
| 1085   | CA  | CA  | . VAL VAL VAL A A 146 146 . | 0.0960 | 0.1066 | 0.0785 | -0.0040 | 0.0100  | - |
| 0.0012 | 1   | .   |                             |        |        |        |         |         |   |
| 1086   | CB  | CB  | . VAL VAL VAL A A 146 146 . | 0.0844 | 0.1337 | 0.0730 | -0.0154 | 0.0336  | - |
| 0.0102 | 1   | .   |                             |        |        |        |         |         |   |
| 1087   | CG1 | CG1 | . VAL VAL VAL A A 146 146 . | 0.1224 | 0.1414 | 0.1024 | -0.0303 | -0.0149 | - |
| 0.0432 | 1   | .   |                             |        |        |        |         |         |   |
| 1088   | CG2 | CG2 | . VAL VAL VAL A A 146 146 . | 0.1157 | 0.0963 | 0.0629 | -0.0023 | 0.0247  | - |
| 0.0255 | 1   | .   |                             |        |        |        |         |         |   |
| 1089   | C   | C   | . VAL VAL VAL A A 146 146 . | 0.0850 | 0.0845 | 0.0777 | 0.0128  | -0.0013 | - |
| 0.0079 | 1   | .   |                             |        |        |        |         |         |   |
| 1090   | O   | O   | . VAL VAL VAL A A 146 146 . | 0.1150 | 0.0884 | 0.0929 | 0.0114  | 0.0214  | - |
| 0.0020 | 1   | .   |                             |        |        |        |         |         |   |
| 1091   | N   | N   | . PRO PRO PRO A A 147 147 . | 0.0778 | 0.0898 | 0.0844 | 0.0139  | -0.0032 | - |
| 0.0006 | 1   | .   |                             |        |        |        |         |         |   |
| 1092   | CA  | CA  | . PRO PRO PRO A A 147 147 . | 0.0651 | 0.1016 | 0.0852 | 0.0101  | 0.0006  | - |
| 0.0066 | 1   | .   |                             |        |        |        |         |         |   |
| 1093   | CB  | CB  | . PRO PRO PRO A A 147 147 . | 0.0751 | 0.0767 | 0.0798 | 0.0258  | 0.0067  | - |
| 0.0031 | 1   | .   |                             |        |        |        |         |         |   |
| 1094   | CG  | CG  | . PRO PRO PRO A A 147 147 . | 0.0554 | 0.0678 | 0.0320 | -0.0112 | 0.0130  | - |
| 0.0112 | 1   | .   |                             |        |        |        |         |         |   |
| 1095   | CD  | CD  | . PRO PRO PRO A A 147 147 . | 0.1132 | 0.0904 | 0.0681 | 0.0406  | -0.0075 | - |
| 0.0407 | 1   | .   |                             |        |        |        |         |         |   |
| 1096   | C   | C   | . PRO PRO PRO A A 147 147 . | 0.0737 | 0.0866 | 0.0899 | -0.0030 | -0.0035 | - |
| 0.0033 | 1   | .   |                             |        |        |        |         |         |   |
| 1097   | O   | O   | . PRO PRO PRO A A 147 147 . | 0.0949 | 0.0983 | 0.0766 | 0.0050  | -0.0096 | - |
| 0.0118 | 1   | .   |                             |        |        |        |         |         |   |
| 1098   | N   | N   | . ALA ALA ALA A A 148 148 . | 0.0508 | 0.0971 | 0.0783 | 0.0064  | 0.0086  | - |
| 0.0023 | 1   | .   |                             |        |        |        |         |         |   |
| 1099   | CA  | CA  | . ALA ALA ALA A A 148 148 . | 0.0673 | 0.0884 | 0.0837 | 0.0000  | -0.0129 | - |
| 0.0020 | 1   | .   |                             |        |        |        |         |         |   |
| 1100   | CB  | CB  | . ALA ALA ALA A A 148 148 . | 0.0983 | 0.0638 | 0.0830 | 0.0160  | 0.0069  | - |
| 0.0044 | 1   | .   |                             |        |        |        |         |         |   |
| 1101   | C   | C   | . ALA ALA ALA A A 148 148 . | 0.0744 | 0.0931 | 0.0930 | 0.0020  | -0.0006 | - |
| 0.0099 | 1   | .   |                             |        |        |        |         |         |   |

|        |     |     |                   |         |                                |           |
|--------|-----|-----|-------------------|---------|--------------------------------|-----------|
| 1102   | O   | O   | . ALA ALA ALA A A | 148 148 | . 0.0996 0.0820 0.0899 0.0008  | -0.0057   |
| 0.0063 | 1   | .   |                   |         |                                |           |
| 1103   | N   | N   | . PHE PHE PHE A A | 149 149 | . 0.0651 0.0896 0.0863 0.0011  | -0.0063   |
| 0.0213 | 1   | .   |                   |         |                                |           |
| 1104   | CA  | CA  | . PHE PHE PHE A A | 149 149 | . 0.0707 0.0766 0.0783 0.0211  | 0.0194    |
| 0.0051 | 1   | .   |                   |         |                                |           |
| 1105   | CB  | CB  | . PHE PHE PHE A A | 149 149 | . 0.0455 0.0851 0.0622 0.0056  | 0.0070    |
| 0.0273 | 1   | .   |                   |         |                                |           |
| 1106   | CG  | CG  | . PHE PHE PHE A A | 149 149 | . 0.0575 0.0772 0.0657 0.0292  | 0.0162 -  |
| 0.0138 | 1   | .   |                   |         |                                |           |
| 1107   | CD1 | CD1 | . PHE PHE PHE A A | 149 149 | . 0.0479 0.0934 0.0905 0.0094  | -0.0095   |
| 0.0050 | 1   | .   |                   |         |                                |           |
| 1108   | CE1 | CE1 | . PHE PHE PHE A A | 149 149 | . 0.0612 0.1002 0.0766 0.0146  | 0.0190 -  |
| 0.0155 | 1   | .   |                   |         |                                |           |
| 1109   | CZ  | CZ  | . PHE PHE PHE A A | 149 149 | . 0.0816 0.0986 0.0802 -0.0192 | -0.0041 - |
| 0.0168 | 1   | .   |                   |         |                                |           |
| 1110   | CE2 | CE2 | . PHE PHE PHE A A | 149 149 | . 0.0680 0.0760 0.0763 0.0146  | 0.0082 -  |
| 0.0090 | 1   | .   |                   |         |                                |           |
| 1111   | CD2 | CD2 | . PHE PHE PHE A A | 149 149 | . 0.0595 0.0792 0.0943 -0.0026 | 0.0099 -  |
| 0.0079 | 1   | .   |                   |         |                                |           |
| 1112   | C   | C   | . PHE PHE PHE A A | 149 149 | . 0.0624 0.0612 0.0755 0.0045  | 0.0095    |
| 0.0153 | 1   | .   |                   |         |                                |           |
| 1113   | O   | O   | . PHE PHE PHE A A | 149 149 | . 0.0829 0.0771 0.0643 0.0102  | 0.0004    |
| 0.0056 | 1   | .   |                   |         |                                |           |
| 1114   | N   | N   | . ASN ASN ASN A A | 150 150 | . 0.0539 0.0652 0.0716 0.0150  | 0.0189 -  |
| 0.0044 | 1   | .   |                   |         |                                |           |
| 1115   | CA  | CA  | . ASN ASN ASN A A | 150 150 | . 0.0620 0.0736 0.1093 0.0073  | 0.0264    |
| 0.0022 | 1   | .   |                   |         |                                |           |
| 1116   | CB  | CB  | . ASN ASN ASN A A | 150 150 | . 0.0604 0.0752 0.1205 0.0293  | 0.0142 -  |
| 0.0357 | 1   | .   |                   |         |                                |           |
| 1117   | CG  | CG  | . ASN ASN ASN A A | 150 150 | . 0.1295 0.1413 0.1276 -0.0129 | 0.0345 -  |
| 0.0362 | 1   | .   |                   |         |                                |           |
| 1118   | OD1 | OD1 | . ASN ASN ASN A A | 150 150 | . 0.1979 0.1313 0.1941 0.0187  | 0.0168 -  |
| 0.0341 | 1   | .   |                   |         |                                |           |
| 1119   | ND2 | ND2 | . ASN ASN ASN A A | 150 150 | . 0.0747 0.0598 0.0882 0.0021  | 0.0044 -  |
| 0.0180 | 1   | .   |                   |         |                                |           |
| 1120   | C   | C   | . ASN ASN ASN A A | 150 150 | . 0.0782 0.1140 0.1059 0.0153  | 0.0082 -  |
| 0.0017 | 1   | .   |                   |         |                                |           |
| 1121   | O   | O   | . ASN ASN ASN A A | 150 150 | . 0.1306 0.1255 0.1183 0.0074  | 0.0094 -  |
| 0.0102 | 1   | .   |                   |         |                                |           |
| 1122   | N   | N   | . VAL VAL VAL A A | 151 151 | . 0.0739 0.0925 0.0922 0.0050  | 0.0050    |
| 0.0152 | 1   | .   |                   |         |                                |           |
| 1123   | CA  | CA  | . VAL VAL VAL A A | 151 151 | . 0.0788 0.0818 0.1214 0.0061  | 0.0220    |
| 0.0095 | 1   | .   |                   |         |                                |           |
| 1124   | CB  | CB  | . VAL VAL VAL A A | 151 151 | . 0.0691 0.1058 0.1173 0.0043  | 0.0113 -  |
| 0.0055 | 1   | .   |                   |         |                                |           |
| 1125   | CG1 | CG1 | . VAL VAL VAL A A | 151 151 | . 0.0796 0.1101 0.1135 -0.0184 | 0.0220 -  |
| 0.0035 | 1   | .   |                   |         |                                |           |
| 1126   | CG2 | CG2 | . VAL VAL VAL A A | 151 151 | . 0.1294 0.0978 0.1611 0.0039  | -0.0045 - |
| 0.0210 | 1   | .   |                   |         |                                |           |
| 1127   | C   | C   | . VAL VAL VAL A A | 151 151 | . 0.0872 0.0786 0.1076 -0.0070 | 0.0066    |
| 0.0049 | 1   | .   |                   |         |                                |           |
| 1128   | O   | O   | . VAL VAL VAL A A | 151 151 | . 0.0783 0.0971 0.1108 -0.0082 | 0.0236    |
| 0.0199 | 1   | .   |                   |         |                                |           |
| 1129   | N   | N   | . ILE ILE ILE A A | 152 152 | . 0.0744 0.0737 0.1119 -0.0048 | 0.0016    |
| 0.0021 | 1   | .   |                   |         |                                |           |
| 1130   | CA  | CA  | . ILE ILE ILE A A | 152 152 | . 0.0942 0.0741 0.1237 0.0032  | 0.0155 -  |
| 0.0115 | 1   | .   |                   |         |                                |           |
| 1131   | CB  | CB  | . ILE ILE ILE A A | 152 152 | . 0.0773 0.0819 0.0982 0.0030  | 0.0109 -  |
| 0.0118 | 1   | .   |                   |         |                                |           |

|        |     |     |                             |        |        |        |         |         |   |
|--------|-----|-----|-----------------------------|--------|--------|--------|---------|---------|---|
| 1132   | CG1 | CG1 | . ILE ILE ILE A A 152 152 . | 0.1268 | 0.1136 | 0.1128 | -0.0291 | -0.0056 |   |
| 0.0027 | 1   | .   |                             |        |        |        |         |         |   |
| 1133   | CD1 | CD1 | . ILE ILE ILE A A 152 152 . | 0.1011 | 0.0786 | 0.1435 | -0.0221 | -0.0193 | - |
| 0.0103 | 1   | .   |                             |        |        |        |         |         |   |
| 1134   | CG2 | CG2 | . ILE ILE ILE A A 152 152 . | 0.1088 | 0.0735 | 0.1668 | -0.0063 | 0.0437  | - |
| 0.0128 | 1   | .   |                             |        |        |        |         |         |   |
| 1135   | C   | C   | . ILE ILE ILE A A 152 152 . | 0.0969 | 0.0991 | 0.1287 | 0.0083  | 0.0079  |   |
| 0.0076 | 1   | .   |                             |        |        |        |         |         |   |
| 1136   | O   | O   | . ILE ILE ILE A A 152 152 . | 0.0787 | 0.0926 | 0.1283 | 0.0191  | -0.0011 |   |
| 0.0057 | 1   | .   |                             |        |        |        |         |         |   |
| 1137   | N   | N   | . ASN ASN ASN A A 153 153 . | 0.0894 | 0.0938 | 0.1208 | 0.0089  | 0.0051  | - |
| 0.0121 | 1   | .   |                             |        |        |        |         |         |   |
| 1138   | CA  | CA  | . ASN ASN ASN A A 153 153 . | 0.1008 | 0.1192 | 0.1350 | 0.0230  | 0.0047  | - |
| 0.0123 | 1   | .   |                             |        |        |        |         |         |   |
| 1139   | CB  | CB  | . ASN ASN ASN A A 153 153 . | 0.0841 | 0.1379 | 0.1406 | 0.0211  | -0.0059 |   |
| 0.0003 | 1   | .   |                             |        |        |        |         |         |   |
| 1140   | CG  | CG  | . ASN ASN ASN A A 153 153 . | 0.1135 | 0.1536 | 0.1507 | 0.0198  | -0.0068 | - |
| 0.0229 | 1   | .   |                             |        |        |        |         |         |   |
| 1141   | OD1 | OD1 | . ASN ASN ASN A A 153 153 . | 0.1735 | 0.2416 | 0.1887 | 0.0212  | 0.0042  |   |
| 0.0089 | 1   | .   |                             |        |        |        |         |         |   |
| 1142   | ND2 | ND2 | . ASN ASN ASN A A 153 153 . | 0.0658 | 0.1116 | 0.0871 | 0.0094  | -0.0149 | - |
| 0.0020 | 1   | .   |                             |        |        |        |         |         |   |
| 1143   | C   | C   | . ASN ASN ASN A A 153 153 . | 0.0970 | 0.1202 | 0.1304 | 0.0070  | 0.0173  |   |
| 0.0076 | 1   | .   |                             |        |        |        |         |         |   |
| 1144   | O   | O   | . ASN ASN ASN A A 153 153 . | 0.1112 | 0.1506 | 0.1612 | 0.0111  | 0.0303  | - |
| 0.0016 | 1   | .   |                             |        |        |        |         |         |   |
| 1145   | N   | N   | . GLY GLY GLY A A 154 154 . | 0.0817 | 0.1196 | 0.1319 | 0.0299  | 0.0156  | - |
| 0.0088 | 1   | .   |                             |        |        |        |         |         |   |
| 1146   | CA  | CA  | . GLY GLY GLY A A 154 154 . | 0.1035 | 0.1154 | 0.1308 | 0.0229  | 0.0138  | - |
| 0.0100 | 1   | .   |                             |        |        |        |         |         |   |
| 1147   | C   | C   | . GLY GLY GLY A A 154 154 . | 0.1058 | 0.1212 | 0.1306 | 0.0163  | 0.0003  | - |
| 0.0143 | 1   | .   |                             |        |        |        |         |         |   |
| 1148   | O   | O   | . GLY GLY GLY A A 154 154 . | 0.1138 | 0.1415 | 0.1572 | 0.0190  | 0.0063  | - |
| 0.0206 | 1   | .   |                             |        |        |        |         |         |   |
| 1149   | N   | N   | . GLY GLY GLY A A 155 155 . | 0.1057 | 0.1263 | 0.1251 | 0.0255  | 0.0093  | - |
| 0.0164 | 1   | .   |                             |        |        |        |         |         |   |
| 1150   | CA  | CA  | . GLY GLY GLY A A 155 155 . | 0.1128 | 0.1198 | 0.1568 | 0.0355  | -0.0127 | - |
| 0.0017 | 1   | .   |                             |        |        |        |         |         |   |
| 1151   | C   | C   | . GLY GLY GLY A A 155 155 . | 0.1242 | 0.1369 | 0.1617 | 0.0319  | 0.0046  | - |
| 0.0087 | 1   | .   |                             |        |        |        |         |         |   |
| 1152   | O   | O   | . GLY GLY GLY A A 155 155 . | 0.1532 | 0.1387 | 0.1378 | 0.0360  | -0.0014 | - |
| 0.0085 | 1   | .   |                             |        |        |        |         |         |   |
| 1153   | N   | N   | . SER SER SER A A 156 156 . | 0.1644 | 0.1480 | 0.1771 | 0.0179  | -0.0049 | - |
| 0.0173 | 1   | .   |                             |        |        |        |         |         |   |
| 1154   | CA  | CA  | . SER SER SER A A 156 156 . | 0.1798 | 0.1499 | 0.2151 | 0.0170  | -0.0103 | - |
| 0.0199 | 1   | .   |                             |        |        |        |         |         |   |
| 1155   | CB  | CB  | . SER SER SER A A 156 156 . | 0.1761 | 0.1550 | 0.2298 | 0.0027  | -0.0160 |   |
| 0.0071 | 1   | .   |                             |        |        |        |         |         |   |
| 1156   | OG  | OG  | . SER SER SER A A 156 156 . | 0.2283 | 0.2119 | 0.2663 | 0.0525  | -0.0110 | - |
| 0.0544 | 1   | .   |                             |        |        |        |         |         |   |
| 1157   | C   | C   | . SER SER SER A A 156 156 . | 0.1924 | 0.1599 | 0.1886 | 0.0146  | -0.0123 | - |
| 0.0191 | 1   | .   |                             |        |        |        |         |         |   |
| 1158   | O   | O   | . SER SER SER A A 156 156 . | 0.2126 | 0.1744 | 0.2201 | 0.0408  | -0.0255 | - |
| 0.0202 | 1   | .   |                             |        |        |        |         |         |   |
| 1159   | N   | N   | . HIS HIS HIS A A 157 157 . | 0.1530 | 0.1396 | 0.1875 | 0.0312  | 0.0052  | - |
| 0.0175 | 1   | .   |                             |        |        |        |         |         |   |
| 1160   | CA  | CA  | . HIS HIS HIS A A 157 157 . | 0.1483 | 0.1489 | 0.1539 | 0.0061  | 0.0227  | - |
| 0.0087 | 1   | .   |                             |        |        |        |         |         |   |
| 1161   | CB  | CB  | . HIS HIS HIS A A 157 157 . | 0.1291 | 0.1594 | 0.1616 | -0.0003 | 0.0319  | - |
| 0.0130 | 1   | .   |                             |        |        |        |         |         |   |

|        |     |     |                             |        |        |        |         |         |   |
|--------|-----|-----|-----------------------------|--------|--------|--------|---------|---------|---|
| 1162   | CG  | CG  | . HIS HIS HIS A A 157 157 . | 0.1516 | 0.1608 | 0.1813 | -0.0051 | 0.0092  |   |
| 0.0108 | 1   | .   |                             |        |        |        |         |         |   |
| 1163   | ND1 | ND1 | . HIS HIS HIS A A 157 157 . | 0.1169 | 0.1528 | 0.1679 | -0.0020 | -0.0041 | - |
| 0.0043 | 1   | .   |                             |        |        |        |         |         |   |
| 1164   | CE1 | CE1 | . HIS HIS HIS A A 157 157 . | 0.1887 | 0.1516 | 0.1951 | -0.0341 | -0.0218 |   |
| 0.0070 | 1   | .   |                             |        |        |        |         |         |   |
| 1165   | NE2 | NE2 | . HIS HIS HIS A A 157 157 . | 0.1246 | 0.1705 | 0.1938 | -0.0013 | 0.0034  |   |
| 0.0165 | 1   | .   |                             |        |        |        |         |         |   |
| 1166   | CD2 | CD2 | . HIS HIS HIS A A 157 157 . | 0.1355 | 0.1785 | 0.1841 | 0.0241  | 0.0291  | - |
| 0.0099 | 1   | .   |                             |        |        |        |         |         |   |
| 1167   | C   | C   | . HIS HIS HIS A A 157 157 . | 0.1582 | 0.1653 | 0.1476 | 0.0075  | 0.0210  | - |
| 0.0124 | 1   | .   |                             |        |        |        |         |         |   |
| 1168   | O   | O   | . HIS HIS HIS A A 157 157 . | 0.1058 | 0.1527 | 0.1543 | -0.0020 | 0.0302  |   |
| 0.0035 | 1   | .   |                             |        |        |        |         |         |   |
| 1169   | N   | N   | . ALA ALA ALA A A 158 158 . | 0.1617 | 0.1734 | 0.1559 | -0.0038 | 0.0088  | - |
| 0.0181 | 1   | .   |                             |        |        |        |         |         |   |
| 1170   | CA  | CA  | . ALA ALA ALA A A 158 158 . | 0.1636 | 0.1720 | 0.1511 | -0.0086 | 0.0234  | - |
| 0.0164 | 1   | .   |                             |        |        |        |         |         |   |
| 1171   | CB  | CB  | . ALA ALA ALA A A 158 158 . | 0.1921 | 0.1980 | 0.2199 | 0.0062  | 0.0225  | - |
| 0.0213 | 1   | .   |                             |        |        |        |         |         |   |
| 1172   | C   | C   | . ALA ALA ALA A A 158 158 . | 0.1502 | 0.1791 | 0.1608 | -0.0020 | 0.0163  | - |
| 0.0081 | 1   | .   |                             |        |        |        |         |         |   |
| 1173   | O   | O   | . ALA ALA ALA A A 158 158 . | 0.1828 | 0.1715 | 0.1631 | -0.0140 | 0.0016  | - |
| 0.0062 | 1   | .   |                             |        |        |        |         |         |   |
| 1174   | N   | N   | . GLY GLY GLY A A 159 159 . | 0.1309 | 0.1674 | 0.1654 | -0.0021 | 0.0132  | - |
| 0.0013 | 1   | .   |                             |        |        |        |         |         |   |
| 1175   | CA  | CA  | . GLY GLY GLY A A 159 159 . | 0.1524 | 0.1758 | 0.1834 | -0.0183 | 0.0280  | - |
| 0.0143 | 1   | .   |                             |        |        |        |         |         |   |
| 1176   | C   | C   | . GLY GLY GLY A A 159 159 . | 0.1536 | 0.1833 | 0.1934 | -0.0189 | 0.0133  | - |
| 0.0042 | 1   | .   |                             |        |        |        |         |         |   |
| 1177   | O   | O   | . GLY GLY GLY A A 159 159 . | 0.1510 | 0.1840 | 0.2171 | -0.0214 | 0.0267  | - |
| 0.0155 | 1   | .   |                             |        |        |        |         |         |   |
| 1178   | N   | N   | . ASN ASN ASN A A 160 160 . | 0.1357 | 0.1786 | 0.1737 | -0.0174 | 0.0189  | - |
| 0.0018 | 1   | .   |                             |        |        |        |         |         |   |
| 1179   | CA  | CA  | . ASN ASN ASN A A 160 160 . | 0.1571 | 0.1737 | 0.1900 | -0.0046 | 0.0171  | - |
| 0.0209 | 1   | .   |                             |        |        |        |         |         |   |
| 1180   | CB  | CB  | . ASN ASN ASN A A 160 160 . | 0.1390 | 0.1699 | 0.1679 | -0.0053 | 0.0296  | - |
| 0.0249 | 1   | .   |                             |        |        |        |         |         |   |
| 1181   | CG  | CG  | . ASN ASN ASN A A 160 160 . | 0.1425 | 0.1605 | 0.1661 | 0.0028  | 0.0107  | - |
| 0.0072 | 1   | .   |                             |        |        |        |         |         |   |
| 1182   | OD1 | OD1 | . ASN ASN ASN A A 160 160 . | 0.1187 | 0.1771 | 0.1862 | -0.0197 | 0.0239  |   |
| 0.0046 | 1   | .   |                             |        |        |        |         |         |   |
| 1183   | ND2 | ND2 | . ASN ASN ASN A A 160 160 . | 0.0933 | 0.1369 | 0.1348 | -0.0079 | 0.0092  | - |
| 0.0136 | 1   | .   |                             |        |        |        |         |         |   |
| 1184   | C   | C   | . ASN ASN ASN A A 160 160 . | 0.1347 | 0.1674 | 0.1808 | -0.0026 | 0.0062  | - |
| 0.0126 | 1   | .   |                             |        |        |        |         |         |   |
| 1185   | O   | O   | . ASN ASN ASN A A 160 160 . | 0.1282 | 0.1664 | 0.1621 | 0.0040  | 0.0179  | - |
| 0.0113 | 1   | .   |                             |        |        |        |         |         |   |
| 1186   | N   | N   | . LYS LYS LYS A A 161 161 . | 0.1582 | 0.1915 | 0.1737 | -0.0032 | 0.0317  | - |
| 0.0219 | 1   | .   |                             |        |        |        |         |         |   |
| 1187   | CA  | CA  | . LYS LYS LYS A A 161 161 . | 0.1405 | 0.2063 | 0.1799 | -0.0156 | 0.0169  | - |
| 0.0125 | 1   | .   |                             |        |        |        |         |         |   |
| 1188   | CB  | CB  | . LYS LYS LYS A A 161 161 . | 0.1341 | 0.2220 | 0.1828 | -0.0307 | 0.0372  | - |
| 0.0044 | 1   | .   |                             |        |        |        |         |         |   |
| 1189   | CG  | CG  | . LYS LYS LYS A A 161 161 . | 0.1837 | 0.2412 | 0.1853 | -0.0607 | 0.0379  |   |
| 0.0129 | 1   | .   |                             |        |        |        |         |         |   |
| 1190   | CD  | CD  | . LYS LYS LYS A A 161 161 . | 0.1887 | 0.2459 | 0.2829 | -0.0418 | 0.0257  |   |
| 0.0114 | 1   | .   |                             |        |        |        |         |         |   |
| 1191   | CE  | CE  | . LYS LYS LYS A A 161 161 . | 0.2490 | 0.3610 | 0.3494 | -0.1018 | 0.0264  |   |
| 0.0226 | 1   | .   |                             |        |        |        |         |         |   |



|        |     |     |                             |        |        |        |         |         |   |
|--------|-----|-----|-----------------------------|--------|--------|--------|---------|---------|---|
| 1192   | NZ  | NZ  | . LYS LYS LYS A A 161 161 . | 0.2922 | 0.4701 | 0.4597 | -0.0478 | -0.0106 |   |
| 0.0420 | 1   | .   |                             |        |        |        |         |         |   |
| 1193   | C   | C   | . LYS LYS LYS A A 161 161 . | 0.1581 | 0.1769 | 0.1813 | 0.0019  | 0.0169  |   |
| 0.0010 | 1   | .   |                             |        |        |        |         |         |   |
| 1194   | O   | O   | . LYS LYS LYS A A 161 161 . | 0.1279 | 0.2241 | 0.2206 | -0.0030 | 0.0116  | - |
| 0.0163 | 1   | .   |                             |        |        |        |         |         |   |
| 1195   | N   | N   | . LEU LEU LEU A A 162 162 . | 0.1253 | 0.1996 | 0.1708 | 0.0112  | 0.0259  | - |
| 0.0042 | 1   | .   |                             |        |        |        |         |         |   |
| 1196   | CA  | CA  | . LEU LEU LEU A A 162 162 . | 0.1298 | 0.1551 | 0.1412 | 0.0293  | 0.0021  |   |
| 0.0054 | 1   | .   |                             |        |        |        |         |         |   |
| 1197   | CB  | CB  | . LEU LEU LEU A A 162 162 . | 0.0795 | 0.1664 | 0.1279 | 0.0303  | 0.0121  | - |
| 0.0248 | 1   | .   |                             |        |        |        |         |         |   |
| 1198   | CG  | CG  | . LEU LEU LEU A A 162 162 . | 0.1017 | 0.1277 | 0.0733 | 0.0285  | 0.0108  | - |
| 0.0014 | 1   | .   |                             |        |        |        |         |         |   |
| 1199   | CD1 | CD1 | . LEU LEU LEU A A 162 162 . | 0.1016 | 0.2114 | 0.1377 | 0.0145  | -0.0249 | - |
| 0.0084 | 1   | .   |                             |        |        |        |         |         |   |
| 1200   | CD2 | CD2 | . LEU LEU LEU A A 162 162 . | 0.1035 | 0.1685 | 0.1750 | 0.0366  | 0.0300  |   |
| 0.0159 | 1   | .   |                             |        |        |        |         |         |   |
| 1201   | C   | C   | . LEU LEU LEU A A 162 162 . | 0.1374 | 0.1745 | 0.1679 | 0.0110  | 0.0084  | - |
| 0.0028 | 1   | .   |                             |        |        |        |         |         |   |
| 1202   | O   | O   | . LEU LEU LEU A A 162 162 . | 0.1493 | 0.1819 | 0.1588 | -0.0008 | -0.0074 | - |
| 0.0092 | 1   | .   |                             |        |        |        |         |         |   |
| 1203   | N   | N   | . ALA ALA ALA A A 163 163 . | 0.1166 | 0.1394 | 0.1372 | 0.0312  | 0.0066  |   |
| 0.0248 | 1   | .   |                             |        |        |        |         |         |   |
| 1204   | CA  | CA  | . ALA ALA ALA A A 163 163 . | 0.1098 | 0.1332 | 0.1537 | -0.0058 | 0.0014  |   |
| 0.0051 | 1   | .   |                             |        |        |        |         |         |   |
| 1205   | CB  | CB  | . ALA ALA ALA A A 163 163 . | 0.1195 | 0.1412 | 0.1576 | 0.0027  | -0.0072 |   |
| 0.0145 | 1   | .   |                             |        |        |        |         |         |   |
| 1206   | C   | C   | . ALA ALA ALA A A 163 163 . | 0.1276 | 0.1308 | 0.1451 | 0.0013  | -0.0032 |   |
| 0.0028 | 1   | .   |                             |        |        |        |         |         |   |
| 1207   | O   | O   | . ALA ALA ALA A A 163 163 . | 0.0895 | 0.1435 | 0.1720 | 0.0081  | -0.0051 |   |
| 0.0138 | 1   | .   |                             |        |        |        |         |         |   |
| 1208   | N   | N   | . MET MET MET A A 164 164 . | 0.0936 | 0.1300 | 0.1380 | 0.0025  | 0.0020  | - |
| 0.0192 | 1   | .   |                             |        |        |        |         |         |   |
| 1209   | CA  | CA  | . MET MET MET A A 164 164 . | 0.1033 | 0.1443 | 0.1282 | -0.0148 | -0.0069 | - |
| 0.0145 | 1   | .   |                             |        |        |        |         |         |   |
| 1210   | CB  | CB  | . MET MET MET A A 164 164 . | 0.0894 | 0.1603 | 0.1402 | -0.0015 | -0.0147 | - |
| 0.0222 | 1   | .   |                             |        |        |        |         |         |   |
| 1211   | CG  | CG  | . MET MET MET A A 164 164 . | 0.1065 | 0.1315 | 0.0719 | -0.0094 | -0.0363 |   |
| 0.0108 | 1   | .   |                             |        |        |        |         |         |   |
| 1212   | SD  | SD  | . MET MET MET A A 164 164 . | 0.1244 | 0.1590 | 0.1545 | 0.0116  | -0.0096 | - |
| 0.0219 | 1   | .   |                             |        |        |        |         |         |   |
| 1213   | CE  | CE  | . MET MET MET A A 164 164 . | 0.1083 | 0.1708 | 0.1667 | 0.0394  | -0.0295 |   |
| 0.0000 | 1   | .   |                             |        |        |        |         |         |   |
| 1214   | C   | C   | . MET MET MET A A 164 164 . | 0.1004 | 0.1326 | 0.1233 | 0.0082  | -0.0023 | - |
| 0.0038 | 1   | .   |                             |        |        |        |         |         |   |
| 1215   | O   | O   | . MET MET MET A A 164 164 . | 0.0977 | 0.1240 | 0.1404 | 0.0026  | -0.0058 | - |
| 0.0003 | 1   | .   |                             |        |        |        |         |         |   |
| 1216   | N   | N   | . GLN GLN GLN A A 165 165 . | 0.0885 | 0.1052 | 0.1272 | -0.0088 | -0.0080 | - |
| 0.0146 | 1   | .   |                             |        |        |        |         |         |   |
| 1217   | CA  | CA  | . GLN GLN GLN A A 165 165 . | 0.0851 | 0.0916 | 0.1107 | 0.0096  | -0.0003 | - |
| 0.0046 | 1   | .   |                             |        |        |        |         |         |   |
| 1218   | CB  | CB  | . GLN GLN GLN A A 165 165 . | 0.0766 | 0.1126 | 0.1135 | 0.0045  | -0.0137 | - |
| 0.0127 | 1   | .   |                             |        |        |        |         |         |   |
| 1219   | CG  | CG  | . GLN GLN GLN A A 165 165 . | 0.0696 | 0.1013 | 0.0844 | -0.0250 | 0.0294  | - |
| 0.0200 | 1   | .   |                             |        |        |        |         |         |   |
| 1220   | CD  | CD  | . GLN GLN GLN A A 165 165 . | 0.1320 | 0.1212 | 0.1193 | -0.0224 | 0.0082  | - |
| 0.0225 | 1   | .   |                             |        |        |        |         |         |   |
| 1221   | OE1 | OE1 | . GLN GLN GLN A A 165 165 . | 0.1091 | 0.1344 | 0.1418 | 0.0050  | 0.0174  | - |
| 0.0155 | 1   | .   |                             |        |        |        |         |         |   |



|        |     |     |                             |        |        |        |         |         |   |
|--------|-----|-----|-----------------------------|--------|--------|--------|---------|---------|---|
| 1252   | O   | O   | . MET MET MET A A 168 168 . | 0.1072 | 0.0974 | 0.1118 | 0.0190  | -0.0039 | - |
| 0.0075 | 1   | .   |                             |        |        |        |         |         |   |
| 1253   | N   | N   | . ILE ILE ILE A A 169 169 . | 0.0882 | 0.0686 | 0.0834 | 0.0174  | 0.0063  |   |
| 0.0048 | 1   | .   |                             |        |        |        |         |         |   |
| 1254   | CA  | CA  | . ILE ILE ILE A A 169 169 . | 0.0627 | 0.0723 | 0.0691 | 0.0020  | 0.0122  | - |
| 0.0008 | 1   | .   |                             |        |        |        |         |         |   |
| 1255   | CB  | CB  | . ILE ILE ILE A A 169 169 . | 0.0902 | 0.0706 | 0.0935 | -0.0332 | -0.0093 |   |
| 0.0085 | 1   | .   |                             |        |        |        |         |         |   |
| 1256   | CG1 | CG1 | . ILE ILE ILE A A 169 169 . | 0.0817 | 0.0727 | 0.1003 | -0.0144 | -0.0336 |   |
| 0.0393 | 1   | .   |                             |        |        |        |         |         |   |
| 1257   | CD1 | CD1 | . ILE ILE ILE A A 169 169 . | 0.1060 | 0.0573 | 0.1022 | 0.0164  | -0.0184 |   |
| 0.0418 | 1   | .   |                             |        |        |        |         |         |   |
| 1258   | CG2 | CG2 | . ILE ILE ILE A A 169 169 . | 0.1066 | 0.1166 | 0.0693 | -0.0284 | 0.0097  |   |
| 0.0139 | 1   | .   |                             |        |        |        |         |         |   |
| 1259   | C   | C   | . ILE ILE ILE A A 169 169 . | 0.0865 | 0.0932 | 0.1032 | 0.0070  | -0.0042 |   |
| 0.0022 | 1   | .   |                             |        |        |        |         |         |   |
| 1260   | O   | O   | . ILE ILE ILE A A 169 169 . | 0.0910 | 0.0882 | 0.1220 | 0.0154  | -0.0085 | - |
| 0.0066 | 1   | .   |                             |        |        |        |         |         |   |
| 1261   | N   | N   | . LEU LEU LEU A A 170 170 . | 0.0742 | 0.0916 | 0.0879 | 0.0186  | 0.0116  |   |
| 0.0018 | 1   | .   |                             |        |        |        |         |         |   |
| 1262   | CA  | CA  | . LEU LEU LEU A A 170 170 . | 0.0757 | 0.0735 | 0.0694 | 0.0030  | -0.0004 |   |
| 0.0122 | 1   | .   |                             |        |        |        |         |         |   |
| 1263   | CB  | CB  | . LEU LEU LEU A A 170 170 . | 0.1042 | 0.0936 | 0.1221 | 0.0217  | -0.0064 |   |
| 0.0127 | 1   | .   |                             |        |        |        |         |         |   |
| 1264   | CG  | CG  | . LEU LEU LEU A A 170 170 . | 0.1520 | 0.1005 | 0.1059 | 0.0053  | 0.0180  | - |
| 0.0051 | 1   | .   |                             |        |        |        |         |         |   |
| 1265   | CD1 | CD1 | . LEU LEU LEU A A 170 170 . | 0.1475 | 0.1636 | 0.2299 | 0.0161  | -0.0237 | - |
| 0.0083 | 1   | .   |                             |        |        |        |         |         |   |
| 1266   | CD2 | CD2 | . LEU LEU LEU A A 170 170 . | 0.1709 | 0.1433 | 0.1093 | 0.0207  | 0.0079  |   |
| 0.0139 | 1   | .   |                             |        |        |        |         |         |   |
| 1267   | C   | C   | . LEU LEU LEU A A 170 170 . | 0.1093 | 0.0818 | 0.0905 | 0.0006  | -0.0100 |   |
| 0.0074 | 1   | .   |                             |        |        |        |         |         |   |
| 1268   | O   | O   | . LEU LEU LEU A A 170 170 . | 0.0987 | 0.0726 | 0.0993 | 0.0039  | -0.0239 |   |
| 0.0056 | 1   | .   |                             |        |        |        |         |         |   |
| 1269   | N   | N   | . PRO PRO PRO A A 171 171 . | 0.0896 | 0.0949 | 0.1115 | 0.0104  | -0.0097 | - |
| 0.0146 | 1   | .   |                             |        |        |        |         |         |   |
| 1270   | CA  | CA  | . PRO PRO PRO A A 171 171 . | 0.1167 | 0.1125 | 0.0988 | 0.0055  | -0.0003 | - |
| 0.0150 | 1   | .   |                             |        |        |        |         |         |   |
| 1271   | CB  | CB  | . PRO PRO PRO A A 171 171 . | 0.1155 | 0.1152 | 0.1055 | 0.0008  | 0.0100  | - |
| 0.0009 | 1   | .   |                             |        |        |        |         |         |   |
| 1272   | CG  | CG  | . PRO PRO PRO A A 171 171 . | 0.0980 | 0.1156 | 0.1054 | 0.0563  | 0.0115  | - |
| 0.0089 | 1   | .   |                             |        |        |        |         |         |   |
| 1273   | CD  | CD  | . PRO PRO PRO A A 171 171 . | 0.1274 | 0.0824 | 0.1128 | 0.0160  | -0.0262 | - |
| 0.0011 | 1   | .   |                             |        |        |        |         |         |   |
| 1274   | C   | C   | . PRO PRO PRO A A 171 171 . | 0.0833 | 0.0966 | 0.0808 | -0.0018 | 0.0007  | - |
| 0.0010 | 1   | .   |                             |        |        |        |         |         |   |
| 1275   | O   | O   | . PRO PRO PRO A A 171 171 . | 0.1286 | 0.1265 | 0.0777 | 0.0028  | 0.0206  | - |
| 0.0066 | 1   | .   |                             |        |        |        |         |         |   |
| 1276   | N   | N   | . VAL VAL VAL A A 172 172 . | 0.1044 | 0.0844 | 0.0736 | 0.0011  | 0.0048  | - |
| 0.0057 | 1   | .   |                             |        |        |        |         |         |   |
| 1277   | CA  | CA  | . VAL VAL VAL A A 172 172 . | 0.0899 | 0.0956 | 0.0860 | 0.0173  | -0.0050 | - |
| 0.0021 | 1   | .   |                             |        |        |        |         |         |   |
| 1278   | CB  | CB  | . VAL VAL VAL A A 172 172 . | 0.0880 | 0.0885 | 0.0802 | 0.0134  | -0.0199 | - |
| 0.0025 | 1   | .   |                             |        |        |        |         |         |   |
| 1279   | CG1 | CG1 | . VAL VAL VAL A A 172 172 . | 0.1424 | 0.0920 | 0.1121 | 0.0104  | 0.0046  | - |
| 0.0328 | 1   | .   |                             |        |        |        |         |         |   |
| 1280   | CG2 | CG2 | . VAL VAL VAL A A 172 172 . | 0.0795 | 0.1199 | 0.1002 | -0.0059 | -0.0178 |   |
| 0.0022 | 1   | .   |                             |        |        |        |         |         |   |
| 1281   | C   | C   | . VAL VAL VAL A A 172 172 . | 0.1175 | 0.1150 | 0.0978 | 0.0049  | 0.0040  | - |
| 0.0177 | 1   | .   |                             |        |        |        |         |         |   |

|        |     |     |                   |         |                                          |
|--------|-----|-----|-------------------|---------|------------------------------------------|
| 1282   | O   | O   | . VAL VAL VAL A A | 172 172 | . 0.1029 0.1033 0.1027 -0.0048 0.0292 -  |
| 0.0215 | 1   | .   |                   |         |                                          |
| 1283   | N   | N   | . GLY GLY GLY A A | 173 173 | . 0.1095 0.1156 0.1014 0.0059 0.0081 -   |
| 0.0142 | 1   | .   |                   |         |                                          |
| 1284   | CA  | CA  | . GLY GLY GLY A A | 173 173 | . 0.1172 0.1295 0.1140 0.0057 -0.0009 -  |
| 0.0129 | 1   | .   |                   |         |                                          |
| 1285   | C   | C   | . GLY GLY GLY A A | 173 173 | . 0.1293 0.1337 0.1311 0.0011 -0.0006 -  |
| 0.0117 | 1   | .   |                   |         |                                          |
| 1286   | O   | O   | . GLY GLY GLY A A | 173 173 | . 0.1399 0.1435 0.1483 0.0030 0.0041 -   |
| 0.0226 | 1   | .   |                   |         |                                          |
| 1287   | N   | N   | . ALA ALA ALA A A | 174 174 | . 0.1312 0.1228 0.1383 -0.0050 -0.0150 - |
| 0.0200 | 1   | .   |                   |         |                                          |
| 1288   | CA  | CA  | . ALA ALA ALA A A | 174 174 | . 0.1271 0.1222 0.1237 -0.0043 -0.0065 - |
| 0.0371 | 1   | .   |                   |         |                                          |
| 1289   | CB  | CB  | . ALA ALA ALA A A | 174 174 | . 0.1223 0.1158 0.1061 -0.0063 -0.0134 - |
| 0.0607 | 1   | .   |                   |         |                                          |
| 1290   | C   | C   | . ALA ALA ALA A A | 174 174 | . 0.1367 0.1298 0.1236 0.0032 -0.0012 -  |
| 0.0282 | 1   | .   |                   |         |                                          |
| 1291   | O   | O   | . ALA ALA ALA A A | 174 174 | . 0.1397 0.1710 0.1413 0.0024 0.0115 -   |
| 0.0204 | 1   | .   |                   |         |                                          |
| 1292   | N   | N   | . GLU GLU GLU A A | 175 175 | . 0.1592 0.1484 0.1632 0.0101 0.0058 -   |
| 0.0293 | 1   | .   |                   |         |                                          |
| 1293   | CA  | CA  | . GLU GLU GLU A A | 175 175 | . 0.1639 0.1697 0.1904 0.0018 0.0153 -   |
| 0.0155 | 1   | .   |                   |         |                                          |
| 1294   | CB  | CB  | . GLU GLU GLU A A | 175 175 | . 0.1884 0.1932 0.2350 0.0096 0.0194 -   |
| 0.0253 | 1   | .   |                   |         |                                          |
| 1295   | CG  | CG  | . GLU GLU GLU A A | 175 175 | . 0.3600 0.2769 0.3765 0.0030 0.0318 -   |
| 0.0117 | 1   | .   |                   |         |                                          |
| 1296   | CD  | CD  | . GLU GLU GLU A A | 175 175 | . 0.5377 0.4536 0.5287 0.0537 0.0762 -   |
| 0.0130 | 1   | .   |                   |         |                                          |
| 1297   | OE1 | OE1 | . GLU GLU GLU A A | 175 175 | . 0.6329 0.5550 0.5654 0.0011 0.0706     |
| 0.0548 | 1   | .   |                   |         |                                          |
| 1298   | OE2 | OE2 | . GLU GLU GLU A A | 175 175 | . 0.6142 0.4575 0.6598 0.0702 0.0470     |
| 0.0391 | 1   | .   |                   |         |                                          |
| 1299   | C   | C   | . GLU GLU GLU A A | 175 175 | . 0.1654 0.1634 0.1639 0.0046 0.0168     |
| 0.0003 | 1   | .   |                   |         |                                          |
| 1300   | O   | O   | . GLU GLU GLU A A | 175 175 | . 0.1586 0.1911 0.1586 -0.0061 0.0382 -  |
| 0.0288 | 1   | .   |                   |         |                                          |
| 1301   | N   | N   | . SER SER SER A A | 176 176 | . 0.1415 0.1261 0.1173 0.0060 0.0181 -   |
| 0.0080 | 1   | .   |                   |         |                                          |
| 1302   | CA  | CA  | . SER SER SER A A | 176 176 | . 0.1401 0.1397 0.1248 0.0022 0.0150 -   |
| 0.0013 | 1   | .   |                   |         |                                          |
| 1303   | CB  | CB  | . SER SER SER A A | 176 176 | . 0.1695 0.1585 0.1588 0.0133 0.0188     |
| 0.0073 | 1   | .   |                   |         |                                          |
| 1304   | OG  | OG  | . SER SER SER A A | 176 176 | . 0.1236 0.1626 0.1192 0.0084 0.0320     |
| 0.0331 | 1   | .   |                   |         |                                          |
| 1305   | C   | C   | . SER SER SER A A | 176 176 | . 0.1342 0.1304 0.1216 -0.0005 0.0167 -  |
| 0.0205 | 1   | .   |                   |         |                                          |
| 1306   | O   | O   | . SER SER SER A A | 176 176 | . 0.1183 0.0989 0.0929 0.0070 0.0062 -   |
| 0.0096 | 1   | .   |                   |         |                                          |
| 1307   | N   | N   | . PHE PHE PHE A A | 177 177 | . 0.1085 0.1011 0.0925 0.0135 0.0098 -   |
| 0.0199 | 1   | .   |                   |         |                                          |
| 1308   | CA  | CA  | . PHE PHE PHE A A | 177 177 | . 0.1042 0.0926 0.0774 0.0174 0.0001 -   |
| 0.0002 | 1   | .   |                   |         |                                          |
| 1309   | CB  | CB  | . PHE PHE PHE A A | 177 177 | . 0.1132 0.0770 0.0885 0.0138 -0.0061 -  |
| 0.0230 | 1   | .   |                   |         |                                          |
| 1310   | CG  | CG  | . PHE PHE PHE A A | 177 177 | . 0.0712 0.1130 0.1057 0.0062 -0.0022 -  |
| 0.0003 | 1   | .   |                   |         |                                          |
| 1311   | CD1 | CD1 | . PHE PHE PHE A A | 177 177 | . 0.0648 0.1368 0.1271 0.0054 -0.0372 -  |
| 0.0376 | 1   | .   |                   |         |                                          |





|        |     |     |                             |        |        |        |         |         |   |
|--------|-----|-----|-----------------------------|--------|--------|--------|---------|---------|---|
| 1372   | O   | O   | . GLY GLY GLY A A 184 184 . | 0.0825 | 0.0696 | 0.0827 | -0.0024 | 0.0192  |   |
| 0.0209 | 1   | .   |                             |        |        |        |         |         |   |
| 1373   | N   | N   | . ALA ALA ALA A A 185 185 . | 0.0966 | 0.0872 | 0.0734 | -0.0019 | -0.0075 |   |
| 0.0059 | 1   | .   |                             |        |        |        |         |         |   |
| 1374   | CA  | CA  | . ALA ALA ALA A A 185 185 . | 0.0852 | 0.0897 | 0.0955 | -0.0035 | -0.0018 |   |
| 0.0042 | 1   | .   |                             |        |        |        |         |         |   |
| 1375   | CB  | CB  | . ALA ALA ALA A A 185 185 . | 0.0366 | 0.1006 | 0.0679 | 0.0060  | -0.0075 |   |
| 0.0180 | 1   | .   |                             |        |        |        |         |         |   |
| 1376   | C   | C   | . ALA ALA ALA A A 185 185 . | 0.0854 | 0.0855 | 0.1146 | -0.0098 | 0.0185  | - |
| 0.0076 | 1   | .   |                             |        |        |        |         |         |   |
| 1377   | O   | O   | . ALA ALA ALA A A 185 185 . | 0.0959 | 0.0901 | 0.0953 | -0.0044 | 0.0266  |   |
| 0.0049 | 1   | .   |                             |        |        |        |         |         |   |
| 1378   | N   | N   | . GLU GLU GLU A A 186 186 . | 0.0738 | 0.0786 | 0.1073 | -0.0063 | -0.0052 | - |
| 0.0103 | 1   | .   |                             |        |        |        |         |         |   |
| 1379   | CA  | CA  | . GLU GLU GLU A A 186 186 . | 0.0765 | 0.0739 | 0.1077 | 0.0190  | -0.0196 | - |
| 0.0149 | 1   | .   |                             |        |        |        |         |         |   |
| 1380   | CB  | CB  | . GLU GLU GLU A A 186 186 . | 0.0715 | 0.1180 | 0.0925 | 0.0274  | -0.0120 | - |
| 0.0059 | 1   | .   |                             |        |        |        |         |         |   |
| 1381   | CG  | CG  | . GLU GLU GLU A A 186 186 . | 0.0620 | 0.1099 | 0.0928 | 0.0473  | -0.0408 | - |
| 0.0298 | 1   | .   |                             |        |        |        |         |         |   |
| 1382   | CD  | CD  | . GLU GLU GLU A A 186 186 . | 0.1507 | 0.1798 | 0.1493 | 0.0268  | -0.0072 | - |
| 0.0211 | 1   | .   |                             |        |        |        |         |         |   |
| 1383   | OE1 | OE1 | . GLU GLU GLU A A 186 186 . | 0.1915 | 0.1437 | 0.1707 | 0.0298  | -0.0219 | - |
| 0.0377 | 1   | .   |                             |        |        |        |         |         |   |
| 1384   | OE2 | OE2 | . GLU GLU GLU A A 186 186 . | 0.1330 | 0.1429 | 0.1458 | 0.0237  | 0.0004  | - |
| 0.0315 | 1   | .   |                             |        |        |        |         |         |   |
| 1385   | C   | C   | . GLU GLU GLU A A 186 186 . | 0.0915 | 0.0668 | 0.0992 | 0.0049  | 0.0060  | - |
| 0.0200 | 1   | .   |                             |        |        |        |         |         |   |
| 1386   | O   | O   | . GLU GLU GLU A A 186 186 . | 0.0923 | 0.0795 | 0.1341 | 0.0038  | -0.0012 |   |
| 0.0146 | 1   | .   |                             |        |        |        |         |         |   |
| 1387   | N   | N   | . VAL VAL VAL A A 187 187 . | 0.0882 | 0.0682 | 0.0826 | -0.0074 | -0.0189 | - |
| 0.0227 | 1   | .   |                             |        |        |        |         |         |   |
| 1388   | CA  | CA  | . VAL VAL VAL A A 187 187 . | 0.0909 | 0.1033 | 0.1046 | 0.0001  | -0.0006 | - |
| 0.0047 | 1   | .   |                             |        |        |        |         |         |   |
| 1389   | CB  | CB  | . VAL VAL VAL A A 187 187 . | 0.0901 | 0.1004 | 0.0791 | 0.0109  | -0.0067 | - |
| 0.0011 | 1   | .   |                             |        |        |        |         |         |   |
| 1390   | CG1 | CG1 | . VAL VAL VAL A A 187 187 . | 0.0865 | 0.0805 | 0.1197 | 0.0045  | 0.0006  | - |
| 0.0079 | 1   | .   |                             |        |        |        |         |         |   |
| 1391   | CG2 | CG2 | . VAL VAL VAL A A 187 187 . | 0.1209 | 0.0971 | 0.1152 | 0.0096  | 0.0215  | - |
| 0.0291 | 1   | .   |                             |        |        |        |         |         |   |
| 1392   | C   | C   | . VAL VAL VAL A A 187 187 . | 0.0940 | 0.1033 | 0.1060 | -0.0031 | 0.0020  | - |
| 0.0066 | 1   | .   |                             |        |        |        |         |         |   |
| 1393   | O   | O   | . VAL VAL VAL A A 187 187 . | 0.1046 | 0.1281 | 0.1209 | -0.0103 | -0.0040 |   |
| 0.0007 | 1   | .   |                             |        |        |        |         |         |   |
| 1394   | N   | N   | . TYR TYR TYR A A 188 188 . | 0.0996 | 0.1224 | 0.1157 | -0.0113 | 0.0165  | - |
| 0.0256 | 1   | .   |                             |        |        |        |         |         |   |
| 1395   | CA  | CA  | . TYR TYR TYR A A 188 188 . | 0.1032 | 0.1124 | 0.0782 | -0.0143 | 0.0087  | - |
| 0.0028 | 1   | .   |                             |        |        |        |         |         |   |
| 1396   | CB  | CB  | . TYR TYR TYR A A 188 188 . | 0.1037 | 0.1060 | 0.0823 | -0.0028 | 0.0013  |   |
| 0.0024 | 1   | .   |                             |        |        |        |         |         |   |
| 1397   | CG  | CG  | . TYR TYR TYR A A 188 188 . | 0.0777 | 0.0847 | 0.0624 | 0.0112  | -0.0150 | - |
| 0.0233 | 1   | .   |                             |        |        |        |         |         |   |
| 1398   | CD1 | CD1 | . TYR TYR TYR A A 188 188 . | 0.0805 | 0.0825 | 0.0978 | -0.0025 | 0.0241  |   |
| 0.0127 | 1   | .   |                             |        |        |        |         |         |   |
| 1399   | CE1 | CE1 | . TYR TYR TYR A A 188 188 . | 0.1038 | 0.0920 | 0.0720 | -0.0204 | 0.0241  | - |
| 0.0197 | 1   | .   |                             |        |        |        |         |         |   |
| 1400   | CZ  | CZ  | . TYR TYR TYR A A 188 188 . | 0.0976 | 0.1261 | 0.1015 | 0.0215  | 0.0100  | - |
| 0.0199 | 1   | .   |                             |        |        |        |         |         |   |
| 1401   | OH  | OH  | . TYR TYR TYR A A 188 188 . | 0.0900 | 0.0933 | 0.0928 | -0.0164 | 0.0139  | - |
| 0.0164 | 1   | .   |                             |        |        |        |         |         |   |





|        |     |     |                             |        |        |        |         |         |   |
|--------|-----|-----|-----------------------------|--------|--------|--------|---------|---------|---|
| 1432   | CA  | CA  | . LYS LYS LYS A A 192 192 . | 0.1139 | 0.1159 | 0.1165 | -0.0126 | -0.0027 |   |
| 0.0143 | 1   | .   |                             |        |        |        |         |         |   |
| 1433   | CB  | CB  | . LYS LYS LYS A A 192 192 . | 0.1002 | 0.1514 | 0.1161 | -0.0038 | -0.0002 |   |
| 0.0085 | 1   | .   |                             |        |        |        |         |         |   |
| 1434   | CG  | CG  | . LYS LYS LYS A A 192 192 . | 0.1474 | 0.1304 | 0.1210 | -0.0396 | -0.0085 |   |
| 0.0180 | 1   | .   |                             |        |        |        |         |         |   |
| 1435   | CD  | CD  | . LYS LYS LYS A A 192 192 . | 0.2380 | 0.2448 | 0.1790 | -0.0428 | -0.0152 | - |
| 0.0203 | 1   | .   |                             |        |        |        |         |         |   |
| 1436   | CE  | CE  | . LYS LYS LYS A A 192 192 . | 0.2737 | 0.3068 | 0.1857 | -0.0377 | 0.0198  |   |
| 0.0180 | 1   | .   |                             |        |        |        |         |         |   |
| 1437   | NZ  | NZ  | . LYS LYS LYS A A 192 192 . | 0.3417 | 0.3604 | 0.1423 | -0.0785 | 0.0274  |   |
| 0.0157 | 1   | .   |                             |        |        |        |         |         |   |
| 1438   | C   | C   | . LYS LYS LYS A A 192 192 . | 0.1241 | 0.1236 | 0.1384 | -0.0140 | 0.0088  |   |
| 0.0097 | 1   | .   |                             |        |        |        |         |         |   |
| 1439   | O   | O   | . LYS LYS LYS A A 192 192 . | 0.1223 | 0.1523 | 0.1300 | 0.0018  | 0.0230  |   |
| 0.0170 | 1   | .   |                             |        |        |        |         |         |   |
| 1440   | N   | N   | . GLY GLY GLY A A 193 193 . | 0.1282 | 0.1136 | 0.1193 | -0.0140 | 0.0129  | - |
| 0.0044 | 1   | .   |                             |        |        |        |         |         |   |
| 1441   | CA  | CA  | . GLY GLY GLY A A 193 193 . | 0.1474 | 0.1403 | 0.1287 | -0.0300 | -0.0065 | - |
| 0.0153 | 1   | .   |                             |        |        |        |         |         |   |
| 1442   | C   | C   | . GLY GLY GLY A A 193 193 . | 0.1552 | 0.1511 | 0.1569 | -0.0114 | -0.0005 |   |
| 0.0027 | 1   | .   |                             |        |        |        |         |         |   |
| 1443   | O   | O   | . GLY GLY GLY A A 193 193 . | 0.1543 | 0.1748 | 0.1779 | -0.0309 | -0.0159 |   |
| 0.0149 | 1   | .   |                             |        |        |        |         |         |   |
| 1444   | N   | N   | . VAL VAL VAL A A 194 194 . | 0.1472 | 0.1153 | 0.1039 | -0.0046 | -0.0156 | - |
| 0.0149 | 1   | .   |                             |        |        |        |         |         |   |
| 1445   | CA  | CA  | . VAL VAL VAL A A 194 194 . | 0.1228 | 0.1358 | 0.1513 | -0.0131 | 0.0030  | - |
| 0.0132 | 1   | .   |                             |        |        |        |         |         |   |
| 1446   | CB  | CB  | . VAL VAL VAL A A 194 194 . | 0.1091 | 0.1429 | 0.1209 | -0.0129 | -0.0092 | - |
| 0.0252 | 1   | .   |                             |        |        |        |         |         |   |
| 1447   | CG1 | CG1 | . VAL VAL VAL A A 194 194 . | 0.0823 | 0.1819 | 0.1404 | -0.0118 | -0.0083 | - |
| 0.0330 | 1   | .   |                             |        |        |        |         |         |   |
| 1448   | CG2 | CG2 | . VAL VAL VAL A A 194 194 . | 0.1538 | 0.2038 | 0.1480 | -0.0228 | 0.0255  | - |
| 0.0516 | 1   | .   |                             |        |        |        |         |         |   |
| 1449   | C   | C   | . VAL VAL VAL A A 194 194 . | 0.1454 | 0.1307 | 0.1609 | -0.0049 | 0.0039  | - |
| 0.0077 | 1   | .   |                             |        |        |        |         |         |   |
| 1450   | O   | O   | . VAL VAL VAL A A 194 194 . | 0.1540 | 0.1528 | 0.2128 | -0.0039 | 0.0231  |   |
| 0.0103 | 1   | .   |                             |        |        |        |         |         |   |
| 1451   | N   | N   | . ILE ILE ILE A A 195 195 . | 0.1312 | 0.1491 | 0.1426 | -0.0095 | -0.0011 | - |
| 0.0102 | 1   | .   |                             |        |        |        |         |         |   |
| 1452   | CA  | CA  | . ILE ILE ILE A A 195 195 . | 0.1428 | 0.1177 | 0.1395 | -0.0099 | 0.0113  | - |
| 0.0186 | 1   | .   |                             |        |        |        |         |         |   |
| 1453   | CB  | CB  | . ILE ILE ILE A A 195 195 . | 0.1252 | 0.1044 | 0.1407 | -0.0225 | 0.0312  | - |
| 0.0238 | 1   | .   |                             |        |        |        |         |         |   |
| 1454   | CG1 | CG1 | . ILE ILE ILE A A 195 195 . | 0.0898 | 0.0750 | 0.1423 | 0.0012  | 0.0069  |   |
| 0.0123 | 1   | .   |                             |        |        |        |         |         |   |
| 1455   | CD1 | CD1 | . ILE ILE ILE A A 195 195 . | 0.1582 | 0.1003 | 0.2126 | -0.0416 | 0.0040  | - |
| 0.0170 | 1   | .   |                             |        |        |        |         |         |   |
| 1456   | CG2 | CG2 | . ILE ILE ILE A A 195 195 . | 0.1127 | 0.1314 | 0.1813 | -0.0110 | 0.0366  | - |
| 0.0281 | 1   | .   |                             |        |        |        |         |         |   |
| 1457   | C   | C   | . ILE ILE ILE A A 195 195 . | 0.1695 | 0.1447 | 0.1647 | -0.0050 | 0.0084  | - |
| 0.0121 | 1   | .   |                             |        |        |        |         |         |   |
| 1458   | O   | O   | . ILE ILE ILE A A 195 195 . | 0.1860 | 0.1913 | 0.1880 | 0.0111  | 0.0178  |   |
| 0.0131 | 1   | .   |                             |        |        |        |         |         |   |
| 1459   | N   | N   | . LYS LYS LYS A A 196 196 . | 0.1528 | 0.1483 | 0.1590 | -0.0040 | -0.0045 | - |
| 0.0015 | 1   | .   |                             |        |        |        |         |         |   |
| 1460   | CA  | CA  | . LYS LYS LYS A A 196 196 . | 0.1679 | 0.1828 | 0.1813 | -0.0114 | 0.0104  |   |
| 0.0061 | 1   | .   |                             |        |        |        |         |         |   |
| 1461   | CB  | CB  | . LYS LYS LYS A A 196 196 . | 0.1711 | 0.1984 | 0.1815 | 0.0106  | -0.0048 |   |
| 0.0402 | 1   | .   |                             |        |        |        |         |         |   |

|        |     |     |                             |        |        |        |         |         |   |
|--------|-----|-----|-----------------------------|--------|--------|--------|---------|---------|---|
| 1462   | CG  | CG  | . LYS LYS LYS A A 196 196 . | 0.2192 | 0.2625 | 0.2091 | 0.0340  | 0.0233  |   |
| 0.0410 | 1   | .   |                             |        |        |        |         |         |   |
| 1463   | CD  | CD  | . LYS LYS LYS A A 196 196 . | 0.2752 | 0.3779 | 0.3224 | 0.0667  | 0.0035  |   |
| 0.0818 | 1   | .   |                             |        |        |        |         |         |   |
| 1464   | CE  | CE  | . LYS LYS LYS A A 196 196 . | 0.4054 | 0.3910 | 0.4556 | 0.0275  | -0.0153 |   |
| 0.0435 | 1   | .   |                             |        |        |        |         |         |   |
| 1465   | C   | C   | . LYS LYS LYS A A 196 196 . | 0.1690 | 0.1842 | 0.1884 | -0.0277 | 0.0148  |   |
| 0.0004 | 1   | .   |                             |        |        |        |         |         |   |
| 1466   | O   | O   | . LYS LYS LYS A A 196 196 . | 0.1936 | 0.2098 | 0.2248 | -0.0503 | 0.0172  |   |
| 0.0119 | 1   | .   |                             |        |        |        |         |         |   |
| 1467   | N   | N   | . ASP ASP ASP A A 197 197 . | 0.1546 | 0.1550 | 0.1827 | -0.0291 | 0.0025  |   |
| 0.0014 | 1   | .   |                             |        |        |        |         |         |   |
| 1468   | CA  | CA  | . ASP ASP ASP A A 197 197 . | 0.1710 | 0.2116 | 0.2152 | -0.0408 | 0.0023  | - |
| 0.0029 | 1   | .   |                             |        |        |        |         |         |   |
| 1469   | CB  | CB  | . ASP ASP ASP A A 197 197 . | 0.1875 | 0.1951 | 0.2372 | -0.0414 | -0.0008 | - |
| 0.0315 | 1   | .   |                             |        |        |        |         |         |   |
| 1470   | CG  | CG  | . ASP ASP ASP A A 197 197 . | 0.2979 | 0.2837 | 0.2974 | -0.0168 | 0.0013  | - |
| 0.0183 | 1   | .   |                             |        |        |        |         |         |   |
| 1471   | OD1 | OD1 | . ASP ASP ASP A A 197 197 . | 0.3059 | 0.3372 | 0.3490 | -0.0073 | 0.0612  | - |
| 0.0437 | 1   | .   |                             |        |        |        |         |         |   |
| 1472   | OD2 | OD2 | . ASP ASP ASP A A 197 197 . | 0.3470 | 0.3728 | 0.3569 | 0.0112  | -0.0351 | - |
| 0.0352 | 1   | .   |                             |        |        |        |         |         |   |
| 1473   | C   | C   | . ASP ASP ASP A A 197 197 . | 0.1851 | 0.2118 | 0.2199 | -0.0313 | -0.0039 | - |
| 0.0161 | 1   | .   |                             |        |        |        |         |         |   |
| 1474   | O   | O   | . ASP ASP ASP A A 197 197 . | 0.1753 | 0.2066 | 0.2342 | -0.0646 | -0.0127 | - |
| 0.0402 | 1   | .   |                             |        |        |        |         |         |   |
| 1475   | N   | N   | . LYS LYS LYS A A 198 198 . | 0.1579 | 0.2103 | 0.1822 | -0.0271 | -0.0210 | - |
| 0.0193 | 1   | .   |                             |        |        |        |         |         |   |
| 1476   | CA  | CA  | . LYS LYS LYS A A 198 198 . | 0.1664 | 0.2156 | 0.1899 | -0.0133 | -0.0074 | - |
| 0.0204 | 1   | .   |                             |        |        |        |         |         |   |
| 1477   | CB  | CB  | . LYS LYS LYS A A 198 198 . | 0.1570 | 0.2246 | 0.1862 | -0.0044 | -0.0341 | - |
| 0.0461 | 1   | .   |                             |        |        |        |         |         |   |
| 1478   | CG  | CG  | . LYS LYS LYS A A 198 198 . | 0.1675 | 0.2239 | 0.1800 | -0.0024 | -0.0291 | - |
| 0.0195 | 1   | .   |                             |        |        |        |         |         |   |
| 1479   | CD  | CD  | . LYS LYS LYS A A 198 198 . | 0.1666 | 0.1856 | 0.1783 | 0.0017  | -0.0372 | - |
| 0.0182 | 1   | .   |                             |        |        |        |         |         |   |
| 1480   | CE  | CE  | . LYS LYS LYS A A 198 198 . | 0.2288 | 0.2370 | 0.2223 | -0.0064 | -0.0300 | - |
| 0.0125 | 1   | .   |                             |        |        |        |         |         |   |
| 1481   | NZ  | NZ  | . LYS LYS LYS A A 198 198 . | 0.3371 | 0.2084 | 0.1874 | -0.0171 | 0.0175  | - |
| 0.0167 | 1   | .   |                             |        |        |        |         |         |   |
| 1482   | C   | C   | . LYS LYS LYS A A 198 198 . | 0.1809 | 0.2355 | 0.2128 | -0.0179 | -0.0092 | - |
| 0.0085 | 1   | .   |                             |        |        |        |         |         |   |
| 1483   | O   | O   | . LYS LYS LYS A A 198 198 . | 0.1756 | 0.2700 | 0.2370 | -0.0402 | 0.0000  | - |
| 0.0039 | 1   | .   |                             |        |        |        |         |         |   |
| 1484   | N   | N   | . TYR TYR TYR A A 199 199 . | 0.1510 | 0.2210 | 0.1935 | -0.0187 | -0.0268 | - |
| 0.0044 | 1   | .   |                             |        |        |        |         |         |   |
| 1485   | CA  | CA  | . TYR TYR TYR A A 199 199 . | 0.1720 | 0.2315 | 0.2033 | -0.0049 | -0.0168 | - |
| 0.0049 | 1   | .   |                             |        |        |        |         |         |   |
| 1486   | CB  | CB  | . TYR TYR TYR A A 199 199 . | 0.1846 | 0.2263 | 0.2102 | -0.0146 | -0.0156 | - |
| 0.0130 | 1   | .   |                             |        |        |        |         |         |   |
| 1487   | CG  | CG  | . TYR TYR TYR A A 199 199 . | 0.1997 | 0.2501 | 0.2328 | -0.0046 | -0.0048 | - |
| 0.0010 | 1   | .   |                             |        |        |        |         |         |   |
| 1488   | CD1 | CD1 | . TYR TYR TYR A A 199 199 . | 0.1639 | 0.1794 | 0.2301 | -0.0423 | -0.0034 | - |
| 0.0316 | 1   | .   |                             |        |        |        |         |         |   |
| 1489   | CE1 | CE1 | . TYR TYR TYR A A 199 199 . | 0.1674 | 0.1856 | 0.1595 | -0.0331 | -0.0080 | - |
| 0.0324 | 1   | .   |                             |        |        |        |         |         |   |
| 1490   | CZ  | CZ  | . TYR TYR TYR A A 199 199 . | 0.1748 | 0.2143 | 0.1915 | -0.0160 | -0.0281 | - |
| 0.0122 | 1   | .   |                             |        |        |        |         |         |   |
| 1491   | OH  | OH  | . TYR TYR TYR A A 199 199 . | 0.1508 | 0.2533 | 0.2185 | -0.0560 | -0.0479 | - |
| 0.0108 | 1   | .   |                             |        |        |        |         |         |   |





|          |     |                             |        |        |        |         |         |   |
|----------|-----|-----------------------------|--------|--------|--------|---------|---------|---|
| 1552 N   | N   | . GLU GLU GLU A A 209 209 . | 0.1062 | 0.1013 | 0.0875 | 0.0037  | 0.0125  | - |
| 0.0087   | 1 . |                             |        |        |        |         |         |   |
| 1553 CA  | CA  | . GLU GLU GLU A A 209 209 . | 0.0956 | 0.0734 | 0.0780 | 0.0139  | 0.0295  |   |
| 0.0113   | 1 . |                             |        |        |        |         |         |   |
| 1554 CB  | CB  | . GLU GLU GLU A A 209 209 . | 0.1167 | 0.0984 | 0.0998 | -0.0141 | -0.0108 | - |
| 0.0039   | 1 . |                             |        |        |        |         |         |   |
| 1555 CG  | CG  | . GLU GLU GLU A A 209 209 . | 0.1238 | 0.1000 | 0.0864 | 0.0299  | 0.0329  |   |
| 0.0099   | 1 . |                             |        |        |        |         |         |   |
| 1556 CD  | CD  | . GLU GLU GLU A A 209 209 . | 0.1278 | 0.1297 | 0.1337 | 0.0050  | 0.0265  |   |
| 0.0032   | 1 . |                             |        |        |        |         |         |   |
| 1557 OE1 | OE1 | . GLU GLU GLU A A 209 209 . | 0.1425 | 0.1534 | 0.1695 | 0.0015  | 0.0037  | - |
| 0.0001   | 1 . |                             |        |        |        |         |         |   |
| 1558 OE2 | OE2 | . GLU GLU GLU A A 209 209 . | 0.1533 | 0.1278 | 0.1342 | 0.0020  | 0.0005  |   |
| 0.0202   | 1 . |                             |        |        |        |         |         |   |
| 1559 C   | C   | . GLU GLU GLU A A 209 209 . | 0.1022 | 0.0933 | 0.0997 | 0.0083  | 0.0057  |   |
| 0.0000   | 1 . |                             |        |        |        |         |         |   |
| 1560 O   | O   | . GLU GLU GLU A A 209 209 . | 0.1065 | 0.0921 | 0.1201 | 0.0166  | 0.0088  | - |
| 0.0051   | 1 . |                             |        |        |        |         |         |   |
| 1561 N   | N   | . GLY GLY GLY A A 210 210 . | 0.0784 | 0.0937 | 0.1172 | 0.0013  | 0.0099  |   |
| 0.0167   | 1 . |                             |        |        |        |         |         |   |
| 1562 CA  | CA  | . GLY GLY GLY A A 210 210 . | 0.1011 | 0.0924 | 0.1046 | -0.0036 | 0.0105  | - |
| 0.0221   | 1 . |                             |        |        |        |         |         |   |
| 1563 C   | C   | . GLY GLY GLY A A 210 210 . | 0.1198 | 0.1184 | 0.1073 | -0.0042 | 0.0069  | - |
| 0.0061   | 1 . |                             |        |        |        |         |         |   |
| 1564 O   | O   | . GLY GLY GLY A A 210 210 . | 0.1100 | 0.1027 | 0.0969 | 0.0042  | 0.0066  | - |
| 0.0119   | 1 . |                             |        |        |        |         |         |   |
| 1565 N   | N   | . GLY GLY GLY A A 211 211 . | 0.1017 | 0.1287 | 0.1137 | -0.0053 | 0.0143  | - |
| 0.0070   | 1 . |                             |        |        |        |         |         |   |
| 1566 CA  | CA  | . GLY GLY GLY A A 211 211 . | 0.1141 | 0.1071 | 0.1076 | -0.0225 | 0.0334  | - |
| 0.0141   | 1 . |                             |        |        |        |         |         |   |
| 1567 C   | C   | . GLY GLY GLY A A 211 211 . | 0.1419 | 0.1238 | 0.1220 | -0.0151 | 0.0215  | - |
| 0.0016   | 1 . |                             |        |        |        |         |         |   |
| 1568 O   | O   | . GLY GLY GLY A A 211 211 . | 0.0960 | 0.1469 | 0.1169 | -0.0317 | 0.0236  |   |
| 0.0071   | 1 . |                             |        |        |        |         |         |   |
| 1569 N   | N   | . PHE PHE PHE A A 212 212 . | 0.1107 | 0.0935 | 0.1048 | -0.0381 | 0.0189  | - |
| 0.0103   | 1 . |                             |        |        |        |         |         |   |
| 1570 CA  | CA  | . PHE PHE PHE A A 212 212 . | 0.0913 | 0.1150 | 0.1332 | 0.0121  | 0.0345  |   |
| 0.0010   | 1 . |                             |        |        |        |         |         |   |
| 1571 CB  | CB  | . PHE PHE PHE A A 212 212 . | 0.0898 | 0.0969 | 0.1391 | 0.0087  | 0.0307  | - |
| 0.0024   | 1 . |                             |        |        |        |         |         |   |
| 1572 CG  | CG  | . PHE PHE PHE A A 212 212 . | 0.1239 | 0.1179 | 0.1472 | 0.0089  | 0.0105  | - |
| 0.0111   | 1 . |                             |        |        |        |         |         |   |
| 1573 CD1 | CD1 | . PHE PHE PHE A A 212 212 . | 0.1105 | 0.0545 | 0.1309 | -0.0101 | 0.0135  | - |
| 0.0150   | 1 . |                             |        |        |        |         |         |   |
| 1574 CE1 | CE1 | . PHE PHE PHE A A 212 212 . | 0.1190 | 0.1254 | 0.1698 | -0.0001 | -0.0003 |   |
| 0.0142   | 1 . |                             |        |        |        |         |         |   |
| 1575 CZ  | CZ  | . PHE PHE PHE A A 212 212 . | 0.1471 | 0.0800 | 0.1306 | -0.0006 | -0.0059 | - |
| 0.0313   | 1 . |                             |        |        |        |         |         |   |
| 1576 CE2 | CE2 | . PHE PHE PHE A A 212 212 . | 0.1182 | 0.0918 | 0.1766 | -0.0048 | 0.0088  | - |
| 0.0098   | 1 . |                             |        |        |        |         |         |   |
| 1577 CD2 | CD2 | . PHE PHE PHE A A 212 212 . | 0.1280 | 0.0623 | 0.1761 | -0.0106 | -0.0078 | - |
| 0.0124   | 1 . |                             |        |        |        |         |         |   |
| 1578 C   | C   | . PHE PHE PHE A A 212 212 . | 0.0811 | 0.1354 | 0.1351 | -0.0014 | 0.0046  |   |
| 0.0067   | 1 . |                             |        |        |        |         |         |   |
| 1579 O   | O   | . PHE PHE PHE A A 212 212 . | 0.0718 | 0.1234 | 0.1353 | -0.0157 | 0.0271  |   |
| 0.0019   | 1 . |                             |        |        |        |         |         |   |
| 1580 N   | N   | . ALA ALA ALA A A 213 213 . | 0.0987 | 0.1325 | 0.1285 | 0.0032  | 0.0172  | - |
| 0.0196   | 1 . |                             |        |        |        |         |         |   |
| 1581 CA  | CA  | . ALA ALA ALA A A 213 213 . | 0.1028 | 0.1379 | 0.1185 | 0.0038  | 0.0120  | - |
| 0.0209   | 1 . |                             |        |        |        |         |         |   |









|        |     |     |                             |        |        |        |         |         |   |
|--------|-----|-----|-----------------------------|--------|--------|--------|---------|---------|---|
| 1672   | CB  | CB  | . LEU LEU LEU A A 225 225 . | 0.1219 | 0.1725 | 0.1345 | -0.0277 | 0.0349  | - |
| 0.0010 | 1   | .   |                             |        |        |        |         |         |   |
| 1673   | CG  | CG  | . LEU LEU LEU A A 225 225 . | 0.0887 | 0.1378 | 0.1451 | -0.0089 | 0.0394  |   |
| 0.0290 | 1   | .   |                             |        |        |        |         |         |   |
| 1674   | CD1 | CD1 | . LEU LEU LEU A A 225 225 . | 0.1565 | 0.1666 | 0.1605 | 0.0094  | 0.0166  |   |
| 0.0232 | 1   | .   |                             |        |        |        |         |         |   |
| 1675   | CD2 | CD2 | . LEU LEU LEU A A 225 225 . | 0.1120 | 0.1363 | 0.1765 | -0.0367 | 0.0468  |   |
| 0.0471 | 1   | .   |                             |        |        |        |         |         |   |
| 1676   | C   | C   | . LEU LEU LEU A A 225 225 . | 0.1214 | 0.1276 | 0.1560 | -0.0176 | 0.0003  | - |
| 0.0008 | 1   | .   |                             |        |        |        |         |         |   |
| 1677   | O   | O   | . LEU LEU LEU A A 225 225 . | 0.1073 | 0.1102 | 0.1611 | -0.0228 | -0.0073 |   |
| 0.0027 | 1   | .   |                             |        |        |        |         |         |   |
| 1678   | N   | N   | . VAL VAL VAL A A 226 226 . | 0.1429 | 0.1351 | 0.1449 | -0.0234 | 0.0059  |   |
| 0.0081 | 1   | .   |                             |        |        |        |         |         |   |
| 1679   | CA  | CA  | . VAL VAL VAL A A 226 226 . | 0.1192 | 0.1329 | 0.1501 | 0.0064  | 0.0176  | - |
| 0.0159 | 1   | .   |                             |        |        |        |         |         |   |
| 1680   | CB  | CB  | . VAL VAL VAL A A 226 226 . | 0.1268 | 0.1311 | 0.1545 | -0.0002 | 0.0286  | - |
| 0.0086 | 1   | .   |                             |        |        |        |         |         |   |
| 1681   | CG1 | CG1 | . VAL VAL VAL A A 226 226 . | 0.1588 | 0.1607 | 0.1254 | -0.0208 | 0.0310  |   |
| 0.0080 | 1   | .   |                             |        |        |        |         |         |   |
| 1682   | CG2 | CG2 | . VAL VAL VAL A A 226 226 . | 0.1622 | 0.0902 | 0.1219 | -0.0163 | -0.0089 | - |
| 0.0215 | 1   | .   |                             |        |        |        |         |         |   |
| 1683   | C   | C   | . VAL VAL VAL A A 226 226 . | 0.1359 | 0.1476 | 0.1500 | 0.0016  | 0.0017  | - |
| 0.0151 | 1   | .   |                             |        |        |        |         |         |   |
| 1684   | O   | O   | . VAL VAL VAL A A 226 226 . | 0.1142 | 0.1336 | 0.1832 | 0.0012  | 0.0033  | - |
| 0.0068 | 1   | .   |                             |        |        |        |         |         |   |
| 1685   | N   | N   | . LYS LYS LYS A A 227 227 . | 0.1318 | 0.1546 | 0.1431 | 0.0039  | 0.0035  | - |
| 0.0193 | 1   | .   |                             |        |        |        |         |         |   |
| 1686   | CA  | CA  | . LYS LYS LYS A A 227 227 . | 0.1616 | 0.1535 | 0.1563 | 0.0105  | -0.0131 | - |
| 0.0302 | 1   | .   |                             |        |        |        |         |         |   |
| 1687   | CB  | CB  | . LYS LYS LYS A A 227 227 . | 0.1690 | 0.1766 | 0.1512 | 0.0290  | -0.0266 | - |
| 0.0318 | 1   | .   |                             |        |        |        |         |         |   |
| 1688   | CG  | CG  | . LYS LYS LYS A A 227 227 . | 0.2658 | 0.2235 | 0.2144 | 0.0527  | -0.0675 | - |
| 0.0609 | 1   | .   |                             |        |        |        |         |         |   |
| 1689   | CD  | CD  | . LYS LYS LYS A A 227 227 . | 0.3290 | 0.3275 | 0.3490 | 0.0567  | -0.0799 | - |
| 0.0943 | 1   | .   |                             |        |        |        |         |         |   |
| 1690   | CE  | CE  | . LYS LYS LYS A A 227 227 . | 0.4430 | 0.4668 | 0.3546 | 0.0788  | -0.0594 | - |
| 0.0596 | 1   | .   |                             |        |        |        |         |         |   |
| 1691   | NZ  | NZ  | . LYS LYS LYS A A 227 227 . | 0.4457 | 0.4411 | 0.3795 | 0.1083  | -0.0984 | - |
| 0.0548 | 1   | .   |                             |        |        |        |         |         |   |
| 1692   | C   | C   | . LYS LYS LYS A A 227 227 . | 0.1562 | 0.1549 | 0.1401 | 0.0084  | -0.0098 | - |
| 0.0181 | 1   | .   |                             |        |        |        |         |         |   |
| 1693   | O   | O   | . LYS LYS LYS A A 227 227 . | 0.1321 | 0.1725 | 0.1745 | -0.0092 | -0.0071 | - |
| 0.0103 | 1   | .   |                             |        |        |        |         |         |   |
| 1694   | N   | N   | . GLU GLU GLU A A 228 228 . | 0.1401 | 0.1301 | 0.1683 | -0.0104 | -0.0111 | - |
| 0.0104 | 1   | .   |                             |        |        |        |         |         |   |
| 1695   | CA  | CA  | . GLU GLU GLU A A 228 228 . | 0.1401 | 0.1464 | 0.1569 | 0.0052  | -0.0293 | - |
| 0.0007 | 1   | .   |                             |        |        |        |         |         |   |
| 1696   | CB  | CB  | . GLU GLU GLU A A 228 228 . | 0.1671 | 0.1395 | 0.1973 | 0.0055  | -0.0195 |   |
| 0.0191 | 1   | .   |                             |        |        |        |         |         |   |
| 1697   | CG  | CG  | . GLU GLU GLU A A 228 228 . | 0.2731 | 0.2028 | 0.2102 | 0.0228  | -0.0484 |   |
| 0.0286 | 1   | .   |                             |        |        |        |         |         |   |
| 1698   | CD  | CD  | . GLU GLU GLU A A 228 228 . | 0.3865 | 0.3023 | 0.3292 | 0.0303  | -0.0457 | - |
| 0.0446 | 1   | .   |                             |        |        |        |         |         |   |
| 1699   | OE1 | OE1 | . GLU GLU GLU A A 228 228 . | 0.4479 | 0.3099 | 0.3777 | -0.0320 | -0.0988 | - |
| 0.1102 | 1   | .   |                             |        |        |        |         |         |   |
| 1700   | OE2 | OE2 | . GLU GLU GLU A A 228 228 . | 0.5103 | 0.3170 | 0.3763 | 0.0245  | -0.0267 | - |
| 0.0444 | 1   | .   |                             |        |        |        |         |         |   |
| 1701   | C   | C   | . GLU GLU GLU A A 228 228 . | 0.1443 | 0.1419 | 0.1716 | 0.0013  | -0.0160 | - |
| 0.0128 | 1   | .   |                             |        |        |        |         |         |   |

|        |     |     |                             |        |        |        |         |         |   |
|--------|-----|-----|-----------------------------|--------|--------|--------|---------|---------|---|
| 1702   | O   | O   | . GLU GLU GLU A A 228 228 . | 0.1370 | 0.1395 | 0.1609 | 0.0000  | -0.0115 | - |
| 0.0205 | 1   | .   |                             |        |        |        |         |         |   |
| 1703   | N   | N   | . ALA ALA ALA A A 229 229 . | 0.1349 | 0.1478 | 0.1495 | -0.0149 | -0.0216 | - |
| 0.0136 | 1   | .   |                             |        |        |        |         |         |   |
| 1704   | CA  | CA  | . ALA ALA ALA A A 229 229 . | 0.1214 | 0.1433 | 0.1437 | -0.0145 | -0.0127 | - |
| 0.0172 | 1   | .   |                             |        |        |        |         |         |   |
| 1705   | CB  | CB  | . ALA ALA ALA A A 229 229 . | 0.1348 | 0.1221 | 0.1276 | -0.0123 | -0.0330 | - |
| 0.0398 | 1   | .   |                             |        |        |        |         |         |   |
| 1706   | C   | C   | . ALA ALA ALA A A 229 229 . | 0.1310 | 0.1181 | 0.1339 | -0.0036 | -0.0121 | - |
| 0.0223 | 1   | .   |                             |        |        |        |         |         |   |
| 1707   | O   | O   | . ALA ALA ALA A A 229 229 . | 0.1306 | 0.1444 | 0.1530 | -0.0020 | -0.0209 | - |
| 0.0122 | 1   | .   |                             |        |        |        |         |         |   |
| 1708   | N   | N   | . ILE ILE ILE A A 230 230 . | 0.1077 | 0.0889 | 0.1231 | -0.0140 | 0.0042  | - |
| 0.0219 | 1   | .   |                             |        |        |        |         |         |   |
| 1709   | CA  | CA  | . ILE ILE ILE A A 230 230 . | 0.1291 | 0.1151 | 0.1443 | -0.0089 | 0.0078  | - |
| 0.0199 | 1   | .   |                             |        |        |        |         |         |   |
| 1710   | CB  | CB  | . ILE ILE ILE A A 230 230 . | 0.0984 | 0.0902 | 0.1152 | 0.0129  | 0.0112  | - |
| 0.0301 | 1   | .   |                             |        |        |        |         |         |   |
| 1711   | CG1 | CG1 | . ILE ILE ILE A A 230 230 . | 0.0911 | 0.0548 | 0.1151 | 0.0061  | -0.0245 | - |
| 0.0188 | 1   | .   |                             |        |        |        |         |         |   |
| 1712   | CD1 | CD1 | . ILE ILE ILE A A 230 230 . | 0.1549 | 0.1311 | 0.1547 | 0.0219  | -0.0259 | - |
| 0.0233 | 1   | .   |                             |        |        |        |         |         |   |
| 1713   | CG2 | CG2 | . ILE ILE ILE A A 230 230 . | 0.1284 | 0.1401 | 0.1239 | -0.0173 | 0.0185  | - |
| 0.0367 | 1   | .   |                             |        |        |        |         |         |   |
| 1714   | C   | C   | . ILE ILE ILE A A 230 230 . | 0.1318 | 0.1361 | 0.1408 | 0.0005  | 0.0006  | - |
| 0.0353 | 1   | .   |                             |        |        |        |         |         |   |
| 1715   | O   | O   | . ILE ILE ILE A A 230 230 . | 0.1264 | 0.1533 | 0.1284 | 0.0078  | -0.0032 | - |
| 0.0202 | 1   | .   |                             |        |        |        |         |         |   |
| 1716   | N   | N   | . ASP ASP ASP A A 231 231 . | 0.1235 | 0.1243 | 0.1524 | -0.0238 | 0.0139  | - |
| 0.0330 | 1   | .   |                             |        |        |        |         |         |   |
| 1717   | CA  | CA  | . ASP ASP ASP A A 231 231 . | 0.1695 | 0.1412 | 0.1859 | 0.0003  | -0.0073 | - |
| 0.0240 | 1   | .   |                             |        |        |        |         |         |   |
| 1718   | CB  | CB  | . ASP ASP ASP A A 231 231 . | 0.1898 | 0.1439 | 0.2071 | -0.0190 | -0.0211 | - |
| 0.0570 | 1   | .   |                             |        |        |        |         |         |   |
| 1719   | CG  | CG  | . ASP ASP ASP A A 231 231 . | 0.2674 | 0.2519 | 0.2457 | -0.0369 | -0.0128 | - |
| 0.0315 | 1   | .   |                             |        |        |        |         |         |   |
| 1720   | OD1 | OD1 | . ASP ASP ASP A A 231 231 . | 0.2890 | 0.3929 | 0.3329 | -0.0258 | 0.0220  | - |
| 0.0408 | 1   | .   |                             |        |        |        |         |         |   |
| 1721   | OD2 | OD2 | . ASP ASP ASP A A 231 231 . | 0.2929 | 0.3980 | 0.2436 | -0.0921 | -0.0181 | - |
| 0.0029 | 1   | .   |                             |        |        |        |         |         |   |
| 1722   | C   | C   | . ASP ASP ASP A A 231 231 . | 0.1736 | 0.1583 | 0.1819 | -0.0079 | -0.0050 | - |
| 0.0204 | 1   | .   |                             |        |        |        |         |         |   |
| 1723   | O   | O   | . ASP ASP ASP A A 231 231 . | 0.1943 | 0.1687 | 0.1781 | 0.0133  | -0.0100 | - |
| 0.0262 | 1   | .   |                             |        |        |        |         |         |   |
| 1724   | N   | N   | . LYS LYS LYS A A 232 232 . | 0.1562 | 0.1425 | 0.1593 | -0.0158 | -0.0138 | - |
| 0.0066 | 1   | .   |                             |        |        |        |         |         |   |
| 1725   | CA  | CA  | . LYS LYS LYS A A 232 232 . | 0.1352 | 0.1503 | 0.1761 | -0.0205 | -0.0064 | - |
| 0.0027 | 1   | .   |                             |        |        |        |         |         |   |
| 1726   | CB  | CB  | . LYS LYS LYS A A 232 232 . | 0.1755 | 0.1175 | 0.1493 | 0.0057  | 0.0016  | - |
| 0.0027 | 1   | .   |                             |        |        |        |         |         |   |
| 1727   | CG  | CG  | . LYS LYS LYS A A 232 232 . | 0.1983 | 0.2670 | 0.2087 | -0.0098 | -0.0222 | - |
| 0.0155 | 1   | .   |                             |        |        |        |         |         |   |
| 1728   | CD  | CD  | . LYS LYS LYS A A 232 232 . | 0.3583 | 0.3671 | 0.2678 | -0.0571 | 0.0280  | - |
| 0.0076 | 1   | .   |                             |        |        |        |         |         |   |
| 1729   | CE  | CE  | . LYS LYS LYS A A 232 232 . | 0.4711 | 0.3930 | 0.3403 | -0.0561 | -0.0049 | - |
| 0.0019 | 1   | .   |                             |        |        |        |         |         |   |
| 1730   | NZ  | NZ  | . LYS LYS LYS A A 232 232 . | 0.5328 | 0.4570 | 0.3767 | -0.0711 | 0.0206  | - |
| 0.0394 | 1   | .   |                             |        |        |        |         |         |   |
| 1731   | C   | C   | . LYS LYS LYS A A 232 232 . | 0.1378 | 0.1445 | 0.1887 | -0.0021 | -0.0057 | - |
| 0.0053 | 1   | .   |                             |        |        |        |         |         |   |

|        |     |     |                             |        |        |        |         |         |   |
|--------|-----|-----|-----------------------------|--------|--------|--------|---------|---------|---|
| 1732   | O   | O   | . LYS LYS LYS A A 232 232 . | 0.1054 | 0.1110 | 0.2126 | -0.0049 | -0.0214 | - |
| 0.0028 | 1   | .   |                             |        |        |        |         |         |   |
| 1733   | N   | N   | . ALA ALA ALA A A 233 233 . | 0.1212 | 0.1221 | 0.1807 | -0.0004 | 0.0020  | - |
| 0.0078 | 1   | .   |                             |        |        |        |         |         |   |
| 1734   | CA  | CA  | . ALA ALA ALA A A 233 233 . | 0.1254 | 0.1362 | 0.1560 | -0.0174 | 0.0000  | - |
| 0.0234 | 1   | .   |                             |        |        |        |         |         |   |
| 1735   | CB  | CB  | . ALA ALA ALA A A 233 233 . | 0.1383 | 0.0776 | 0.1536 | -0.0054 | 0.0216  | - |
| 0.0346 | 1   | .   |                             |        |        |        |         |         |   |
| 1736   | C   | C   | . ALA ALA ALA A A 233 233 . | 0.1517 | 0.1240 | 0.1662 | 0.0002  | -0.0020 | - |
| 0.0258 | 1   | .   |                             |        |        |        |         |         |   |
| 1737   | O   | O   | . ALA ALA ALA A A 233 233 . | 0.1378 | 0.1511 | 0.1737 | -0.0311 | -0.0037 | - |
| 0.0423 | 1   | .   |                             |        |        |        |         |         |   |
| 1738   | N   | N   | . GLY GLY GLY A A 234 234 . | 0.1628 | 0.1535 | 0.1572 | 0.0053  | -0.0035 | - |
| 0.0122 | 1   | .   |                             |        |        |        |         |         |   |
| 1739   | CA  | CA  | . GLY GLY GLY A A 234 234 . | 0.1638 | 0.1472 | 0.1467 | 0.0097  | 0.0000  | - |
| 0.0104 | 1   | .   |                             |        |        |        |         |         |   |
| 1740   | C   | C   | . GLY GLY GLY A A 234 234 . | 0.1358 | 0.1373 | 0.1496 | -0.0100 | 0.0042  | - |
| 0.0210 | 1   | .   |                             |        |        |        |         |         |   |
| 1741   | O   | O   | . GLY GLY GLY A A 234 234 . | 0.1780 | 0.1471 | 0.1636 | 0.0174  | 0.0170  | - |
| 0.0120 | 1   | .   |                             |        |        |        |         |         |   |
| 1742   | N   | N   | . TYR TYR TYR A A 235 235 . | 0.1051 | 0.1326 | 0.1296 | -0.0074 | -0.0067 | - |
| 0.0116 | 1   | .   |                             |        |        |        |         |         |   |
| 1743   | CA  | CA  | . TYR TYR TYR A A 235 235 . | 0.1232 | 0.1083 | 0.1244 | -0.0020 | -0.0274 | - |
| 0.0155 | 1   | .   |                             |        |        |        |         |         |   |
| 1744   | CB  | CB  | . TYR TYR TYR A A 235 235 . | 0.1284 | 0.1390 | 0.1259 | 0.0006  | -0.0297 | - |
| 0.0212 | 1   | .   |                             |        |        |        |         |         |   |
| 1745   | CG  | CG  | . TYR TYR TYR A A 235 235 . | 0.1116 | 0.0898 | 0.1234 | -0.0035 | -0.0232 | - |
| 0.0130 | 1   | .   |                             |        |        |        |         |         |   |
| 1746   | CD1 | CD1 | . TYR TYR TYR A A 235 235 . | 0.1538 | 0.1851 | 0.1679 | 0.0052  | -0.0262 | - |
| 0.0063 | 1   | .   |                             |        |        |        |         |         |   |
| 1747   | CE1 | CE1 | . TYR TYR TYR A A 235 235 . | 0.1141 | 0.1242 | 0.1520 | 0.0001  | -0.0351 | - |
| 0.0034 | 1   | .   |                             |        |        |        |         |         |   |
| 1748   | CZ  | CZ  | . TYR TYR TYR A A 235 235 . | 0.1701 | 0.1618 | 0.1704 | 0.0139  | -0.0114 | - |
| 0.0128 | 1   | .   |                             |        |        |        |         |         |   |
| 1749   | OH  | OH  | . TYR TYR TYR A A 235 235 . | 0.1640 | 0.1794 | 0.1998 | 0.0284  | -0.0440 | - |
| 0.0212 | 1   | .   |                             |        |        |        |         |         |   |
| 1750   | CE2 | CE2 | . TYR TYR TYR A A 235 235 . | 0.1685 | 0.1719 | 0.1441 | 0.0096  | -0.0326 | - |
| 0.0033 | 1   | .   |                             |        |        |        |         |         |   |
| 1751   | CD2 | CD2 | . TYR TYR TYR A A 235 235 . | 0.1471 | 0.1457 | 0.1228 | 0.0018  | 0.0014  | - |
| 0.0198 | 1   | .   |                             |        |        |        |         |         |   |
| 1752   | C   | C   | . TYR TYR TYR A A 235 235 . | 0.1219 | 0.1393 | 0.1422 | -0.0059 | -0.0116 | - |
| 0.0051 | 1   | .   |                             |        |        |        |         |         |   |
| 1753   | O   | O   | . TYR TYR TYR A A 235 235 . | 0.1202 | 0.1281 | 0.1317 | 0.0004  | -0.0044 | - |
| 0.0177 | 1   | .   |                             |        |        |        |         |         |   |
| 1754   | N   | N   | . THR THR THR A A 236 236 . | 0.1498 | 0.1611 | 0.1528 | -0.0158 | -0.0341 | - |
| 0.0238 | 1   | .   |                             |        |        |        |         |         |   |
| 1755   | CA  | CA  | . THR THR THR A A 236 236 . | 0.1620 | 0.1619 | 0.1659 | -0.0106 | -0.0199 | - |
| 0.0008 | 1   | .   |                             |        |        |        |         |         |   |
| 1756   | CB  | CB  | . THR THR THR A A 236 236 . | 0.1640 | 0.2068 | 0.1856 | -0.0389 | -0.0265 | - |
| 0.0028 | 1   | .   |                             |        |        |        |         |         |   |
| 1757   | OG1 | OG1 | . THR THR THR A A 236 236 . | 0.2319 | 0.2518 | 0.2337 | -0.0571 | -0.0424 | - |
| 0.0137 | 1   | .   |                             |        |        |        |         |         |   |
| 1758   | CG2 | CG2 | . THR THR THR A A 236 236 . | 0.1718 | 0.1596 | 0.1907 | -0.0088 | -0.0079 | - |
| 0.0216 | 1   | .   |                             |        |        |        |         |         |   |
| 1759   | C   | C   | . THR THR THR A A 236 236 . | 0.1851 | 0.1836 | 0.1643 | -0.0120 | -0.0231 | - |
| 0.0270 | 1   | .   |                             |        |        |        |         |         |   |
| 1760   | O   | O   | . THR THR THR A A 236 236 . | 0.1909 | 0.1736 | 0.1554 | 0.0018  | -0.0271 | - |
| 0.0076 | 1   | .   |                             |        |        |        |         |         |   |
| 1761   | N   | N   | . GLU GLU GLU A A 237 237 . | 0.1827 | 0.1984 | 0.1805 | -0.0161 | -0.0199 | - |
| 0.0328 | 1   | .   |                             |        |        |        |         |         |   |



|        |     |     |                             |        |        |        |         |         |   |
|--------|-----|-----|-----------------------------|--------|--------|--------|---------|---------|---|
| 1792   | CB  | CB  | . ILE ILE ILE A A 241 241 . | 0.0836 | 0.0910 | 0.0837 | -0.0038 | -0.0008 |   |
| 0.0160 | 1   | .   |                             |        |        |        |         |         |   |
| 1793   | CG1 | CG1 | . ILE ILE ILE A A 241 241 . | 0.1433 | 0.1075 | 0.1536 | -0.0264 | -0.0036 | - |
| 0.0032 | 1   | .   |                             |        |        |        |         |         |   |
| 1794   | CD1 | CD1 | . ILE ILE ILE A A 241 241 . | 0.1492 | 0.1430 | 0.2481 | -0.0579 | -0.0365 |   |
| 0.0427 | 1   | .   |                             |        |        |        |         |         |   |
| 1795   | CG2 | CG2 | . ILE ILE ILE A A 241 241 . | 0.1252 | 0.1299 | 0.1245 | 0.0053  | 0.0097  |   |
| 0.0150 | 1   | .   |                             |        |        |        |         |         |   |
| 1796   | C   | C   | . ILE ILE ILE A A 241 241 . | 0.0962 | 0.1061 | 0.1171 | 0.0190  | -0.0025 | - |
| 0.0110 | 1   | .   |                             |        |        |        |         |         |   |
| 1797   | O   | O   | . ILE ILE ILE A A 241 241 . | 0.1342 | 0.1415 | 0.1357 | 0.0037  | 0.0012  | - |
| 0.0289 | 1   | .   |                             |        |        |        |         |         |   |
| 1798   | N   | N   | . GLY GLY GLY A A 242 242 . | 0.0772 | 0.0859 | 0.1163 | -0.0036 | -0.0094 | - |
| 0.0262 | 1   | .   |                             |        |        |        |         |         |   |
| 1799   | CA  | CA  | . GLY GLY GLY A A 242 242 . | 0.0593 | 0.1012 | 0.1092 | 0.0121  | -0.0082 | - |
| 0.0030 | 1   | .   |                             |        |        |        |         |         |   |
| 1800   | C   | C   | . GLY GLY GLY A A 242 242 . | 0.0916 | 0.1055 | 0.0916 | 0.0145  | -0.0006 |   |
| 0.0196 | 1   | .   |                             |        |        |        |         |         |   |
| 1801   | O   | O   | . GLY GLY GLY A A 242 242 . | 0.1111 | 0.1261 | 0.1245 | 0.0188  | -0.0026 |   |
| 0.0026 | 1   | .   |                             |        |        |        |         |         |   |
| 1802   | N   | N   | . MET MET MET A A 243 243 . | 0.0986 | 0.1111 | 0.1342 | 0.0059  | 0.0088  | - |
| 0.0032 | 1   | .   |                             |        |        |        |         |         |   |
| 1803   | CA  | CA  | . MET MET MET A A 243 243 . | 0.0996 | 0.1101 | 0.0975 | 0.0045  | -0.0132 | - |
| 0.0026 | 1   | .   |                             |        |        |        |         |         |   |
| 1804   | CB  | CB  | . MET MET MET A A 243 243 . | 0.0843 | 0.0989 | 0.1242 | -0.0171 | -0.0267 |   |
| 0.0044 | 1   | .   |                             |        |        |        |         |         |   |
| 1805   | CG  | CG  | . MET MET MET A A 243 243 . | 0.1249 | 0.1138 | 0.1838 | -0.0269 | -0.0377 | - |
| 0.0376 | 1   | .   |                             |        |        |        |         |         |   |
| 1806   | SD  | SD  | . MET MET MET A A 243 243 . | 0.1371 | 0.1631 | 0.1972 | -0.0141 | -0.0041 | - |
| 0.0369 | 1   | .   |                             |        |        |        |         |         |   |
| 1807   | CE  | CE  | . MET MET MET A A 243 243 . | 0.1360 | 0.2368 | 0.1379 | -0.0029 | -0.0249 | - |
| 0.0425 | 1   | .   |                             |        |        |        |         |         |   |
| 1808   | C   | C   | . MET MET MET A A 243 243 . | 0.0997 | 0.1145 | 0.1105 | -0.0090 | -0.0133 |   |
| 0.0010 | 1   | .   |                             |        |        |        |         |         |   |
| 1809   | O   | O   | . MET MET MET A A 243 243 . | 0.1089 | 0.1275 | 0.1151 | -0.0150 | 0.0099  |   |
| 0.0064 | 1   | .   |                             |        |        |        |         |         |   |
| 1810   | N   | N   | . ASP ASP ASP A A 244 244 . | 0.1040 | 0.1201 | 0.1255 | 0.0024  | -0.0203 | - |
| 0.0282 | 1   | .   |                             |        |        |        |         |         |   |
| 1811   | CA  | CA  | . ASP ASP ASP A A 244 244 . | 0.0906 | 0.1117 | 0.1360 | 0.0000  | -0.0117 | - |
| 0.0186 | 1   | .   |                             |        |        |        |         |         |   |
| 1812   | CB  | CB  | . ASP ASP ASP A A 244 244 . | 0.1107 | 0.1090 | 0.1549 | 0.0008  | -0.0190 | - |
| 0.0212 | 1   | .   |                             |        |        |        |         |         |   |
| 1813   | CG  | CG  | . ASP ASP ASP A A 244 244 . | 0.1146 | 0.1233 | 0.1551 | 0.0112  | -0.0329 | - |
| 0.0162 | 1   | .   |                             |        |        |        |         |         |   |
| 1814   | OD1 | OD1 | . ASP ASP ASP A A 244 244 . | 0.1178 | 0.0903 | 0.1284 | -0.0244 | -0.0210 | - |
| 0.0085 | 1   | .   |                             |        |        |        |         |         |   |
| 1815   | OD2 | OD2 | . ASP ASP ASP A A 244 244 . | 0.1079 | 0.1324 | 0.1288 | 0.0139  | -0.0036 | - |
| 0.0038 | 1   | .   |                             |        |        |        |         |         |   |
| 1816   | C   | C   | . ASP ASP ASP A A 244 244 . | 0.1083 | 0.1262 | 0.1281 | 0.0135  | -0.0009 | - |
| 0.0038 | 1   | .   |                             |        |        |        |         |         |   |
| 1817   | O   | O   | . ASP ASP ASP A A 244 244 . | 0.1116 | 0.1383 | 0.1174 | 0.0169  | 0.0194  | - |
| 0.0116 | 1   | .   |                             |        |        |        |         |         |   |
| 1818   | N   | N   | . VAL VAL VAL A A 245 245 . | 0.0773 | 0.1194 | 0.1180 | -0.0071 | -0.0081 | - |
| 0.0105 | 1   | .   |                             |        |        |        |         |         |   |
| 1819   | CA  | CA  | . VAL VAL VAL A A 245 245 . | 0.0880 | 0.1414 | 0.1194 | 0.0132  | -0.0043 | - |
| 0.0222 | 1   | .   |                             |        |        |        |         |         |   |
| 1820   | CB  | CB  | . VAL VAL VAL A A 245 245 . | 0.0502 | 0.0935 | 0.0658 | 0.0305  | 0.0023  | - |
| 0.0068 | 1   | .   |                             |        |        |        |         |         |   |
| 1821   | CG1 | CG1 | . VAL VAL VAL A A 245 245 . | 0.0284 | 0.1450 | 0.0977 | 0.0167  | -0.0013 | - |
| 0.0543 | 1   | .   |                             |        |        |        |         |         |   |





|        |     |     |                             |        |        |        |         |         |   |
|--------|-----|-----|-----------------------------|--------|--------|--------|---------|---------|---|
| 1882   | C   | C   | . ARG ARG ARG A A 252 252 . | 0.2531 | 0.3135 | 0.3105 | 0.0205  | -0.0191 | - |
| 0.0272 | 1   | .   |                             |        |        |        |         |         |   |
| 1883   | O   | O   | . ARG ARG ARG A A 252 252 . | 0.2073 | 0.3203 | 0.3173 | 0.0025  | -0.0233 | - |
| 0.0398 | 1   | .   |                             |        |        |        |         |         |   |
| 1884   | N   | N   | . ASP ASP ASP A A 253 253 . | 0.2870 | 0.3423 | 0.3469 | 0.0373  | -0.0278 | - |
| 0.0181 | 1   | .   |                             |        |        |        |         |         |   |
| 1885   | CA  | CA  | . ASP ASP ASP A A 253 253 . | 0.3315 | 0.3853 | 0.3607 | 0.0308  | -0.0211 | - |
| 0.0078 | 1   | .   |                             |        |        |        |         |         |   |
| 1886   | CB  | CB  | . ASP ASP ASP A A 253 253 . | 0.3570 | 0.4182 | 0.3894 | 0.0347  | -0.0125 | - |
| 0.0098 | 1   | .   |                             |        |        |        |         |         |   |
| 1887   | CG  | CG  | . ASP ASP ASP A A 253 253 . | 0.4215 | 0.4804 | 0.4521 | 0.0327  | 0.0061  | - |
| 0.0020 | 1   | .   |                             |        |        |        |         |         |   |
| 1888   | OD1 | OD1 | . ASP ASP ASP A A 253 253 . | 0.4479 | 0.5769 | 0.4481 | 0.1340  | 0.0371  | - |
| 0.0704 | 1   | .   |                             |        |        |        |         |         |   |
| 1889   | OD2 | OD2 | . ASP ASP ASP A A 253 253 . | 0.4881 | 0.5890 | 0.5185 | 0.0079  | -0.0060 | - |
| 0.0351 | 1   | .   |                             |        |        |        |         |         |   |
| 1890   | C   | C   | . ASP ASP ASP A A 253 253 . | 0.3199 | 0.3641 | 0.3554 | 0.0168  | -0.0112 | - |
| 0.0242 | 1   | .   |                             |        |        |        |         |         |   |
| 1891   | O   | O   | . ASP ASP ASP A A 253 253 . | 0.3059 | 0.3911 | 0.3934 | 0.0387  | -0.0050 | - |
| 0.0224 | 1   | .   |                             |        |        |        |         |         |   |
| 1892   | N   | N   | . GLY GLY GLY A A 254 254 . | 0.2607 | 0.3164 | 0.3266 | 0.0364  | -0.0147 | - |
| 0.0249 | 1   | .   |                             |        |        |        |         |         |   |
| 1893   | CA  | CA  | . GLY GLY GLY A A 254 254 . | 0.2598 | 0.2819 | 0.3060 | 0.0321  | -0.0178 | - |
| 0.0242 | 1   | .   |                             |        |        |        |         |         |   |
| 1894   | C   | C   | . GLY GLY GLY A A 254 254 . | 0.2266 | 0.2515 | 0.2762 | 0.0362  | -0.0140 | - |
| 0.0111 | 1   | .   |                             |        |        |        |         |         |   |
| 1895   | O   | O   | . GLY GLY GLY A A 254 254 . | 0.2546 | 0.2342 | 0.2817 | 0.0554  | -0.0192 | - |
| 0.0174 | 1   | .   |                             |        |        |        |         |         |   |
| 1896   | N   | N   | . LYS LYS LYS A A 255 255 . | 0.1884 | 0.2402 | 0.2583 | 0.0358  | -0.0195 | - |
| 0.0234 | 1   | .   |                             |        |        |        |         |         |   |
| 1897   | CA  | CA  | . LYS LYS LYS A A 255 255 . | 0.1828 | 0.2223 | 0.2622 | 0.0214  | -0.0197 | - |
| 0.0030 | 1   | .   |                             |        |        |        |         |         |   |
| 1898   | CB  | CB  | . LYS LYS LYS A A 255 255 . | 0.1808 | 0.2558 | 0.2780 | 0.0304  | -0.0146 | - |
| 0.0058 | 1   | .   |                             |        |        |        |         |         |   |
| 1899   | CG  | CG  | . LYS LYS LYS A A 255 255 . | 0.2144 | 0.2808 | 0.2941 | 0.0150  | -0.0495 | - |
| 0.0228 | 1   | .   |                             |        |        |        |         |         |   |
| 1900   | CD  | CD  | . LYS LYS LYS A A 255 255 . | 0.2839 | 0.2802 | 0.4034 | -0.0055 | 0.0343  |   |
| 0.0208 | 1   | .   |                             |        |        |        |         |         |   |
| 1901   | CE  | CE  | . LYS LYS LYS A A 255 255 . | 0.3140 | 0.3593 | 0.4474 | -0.0145 | 0.0274  | - |
| 0.0175 | 1   | .   |                             |        |        |        |         |         |   |
| 1902   | NZ  | NZ  | . LYS LYS LYS A A 255 255 . | 0.3557 | 0.4329 | 0.5398 | -0.0196 | -0.0094 |   |
| 0.0451 | 1   | .   |                             |        |        |        |         |         |   |
| 1903   | C   | C   | . LYS LYS LYS A A 255 255 . | 0.1659 | 0.2205 | 0.2665 | 0.0283  | -0.0165 | - |
| 0.0182 | 1   | .   |                             |        |        |        |         |         |   |
| 1904   | O   | O   | . LYS LYS LYS A A 255 255 . | 0.1267 | 0.2214 | 0.2971 | 0.0403  | -0.0230 | - |
| 0.0183 | 1   | .   |                             |        |        |        |         |         |   |
| 1905   | N   | N   | . TYR TYR TYR A A 256 256 . | 0.1355 | 0.1949 | 0.2417 | 0.0312  | -0.0137 | - |
| 0.0030 | 1   | .   |                             |        |        |        |         |         |   |
| 1906   | CA  | CA  | . TYR TYR TYR A A 256 256 . | 0.1563 | 0.1948 | 0.2002 | 0.0287  | -0.0093 | - |
| 0.0108 | 1   | .   |                             |        |        |        |         |         |   |
| 1907   | CB  | CB  | . TYR TYR TYR A A 256 256 . | 0.0955 | 0.1940 | 0.2002 | 0.0332  | -0.0160 | - |
| 0.0148 | 1   | .   |                             |        |        |        |         |         |   |
| 1908   | CG  | CG  | . TYR TYR TYR A A 256 256 . | 0.1322 | 0.2093 | 0.1719 | 0.0077  | 0.0026  | - |
| 0.0168 | 1   | .   |                             |        |        |        |         |         |   |
| 1909   | CD1 | CD1 | . TYR TYR TYR A A 256 256 . | 0.1168 | 0.1912 | 0.1748 | -0.0036 | -0.0135 | - |
| 0.0446 | 1   | .   |                             |        |        |        |         |         |   |
| 1910   | CE1 | CE1 | . TYR TYR TYR A A 256 256 . | 0.1558 | 0.2044 | 0.1899 | 0.0167  | 0.0021  | - |
| 0.0226 | 1   | .   |                             |        |        |        |         |         |   |
| 1911   | CZ  | CZ  | . TYR TYR TYR A A 256 256 . | 0.1637 | 0.1484 | 0.1674 | 0.0127  | -0.0102 | - |
| 0.0262 | 1   | .   |                             |        |        |        |         |         |   |







|        |     |     |                             |        |        |        |         |         |   |
|--------|-----|-----|-----------------------------|--------|--------|--------|---------|---------|---|
| 1972   | C   | C   | . PRO PRO PRO A A 263 263 . | 0.2923 | 0.3451 | 0.3385 | 0.0301  | 0.0390  |   |
| 0.0061 | 1   | .   |                             |        |        |        |         |         |   |
| 1973   | O   | O   | . PRO PRO PRO A A 263 263 . | 0.2495 | 0.3388 | 0.3189 | 0.0414  | 0.0370  | - |
| 0.0052 | 1   | .   |                             |        |        |        |         |         |   |
| 1974   | N   | N   | . THR THR THR A A 264 264 . | 0.3211 | 0.3680 | 0.3586 | 0.0258  | 0.0433  |   |
| 0.0049 | 1   | .   |                             |        |        |        |         |         |   |
| 1975   | CA  | CA  | . THR THR THR A A 264 264 . | 0.3431 | 0.3793 | 0.3680 | 0.0240  | 0.0298  | - |
| 0.0014 | 1   | .   |                             |        |        |        |         |         |   |
| 1976   | CB  | CB  | . THR THR THR A A 264 264 . | 0.3564 | 0.3870 | 0.3749 | 0.0117  | 0.0276  | - |
| 0.0020 | 1   | .   |                             |        |        |        |         |         |   |
| 1977   | OG1 | OG1 | . THR THR THR A A 264 264 . | 0.3488 | 0.3992 | 0.3674 | 0.0177  | 0.0375  | - |
| 0.0233 | 1   | .   |                             |        |        |        |         |         |   |
| 1978   | CG2 | CG2 | . THR THR THR A A 264 264 . | 0.3835 | 0.4084 | 0.3920 | 0.0289  | 0.0070  | - |
| 0.0129 | 1   | .   |                             |        |        |        |         |         |   |
| 1979   | C   | C   | . THR THR THR A A 264 264 . | 0.3622 | 0.3899 | 0.3789 | 0.0215  | 0.0256  | - |
| 0.0020 | 1   | .   |                             |        |        |        |         |         |   |
| 1980   | O   | O   | . THR THR THR A A 264 264 . | 0.3576 | 0.3997 | 0.3771 | 0.0221  | 0.0470  |   |
| 0.0181 | 1   | .   |                             |        |        |        |         |         |   |
| 1981   | N   | N   | . ASP ASP ASP A A 265 265 . | 0.3609 | 0.4027 | 0.3846 | 0.0250  | 0.0171  | - |
| 0.0068 | 1   | .   |                             |        |        |        |         |         |   |
| 1982   | CA  | CA  | . ASP ASP ASP A A 265 265 . | 0.3657 | 0.4054 | 0.4022 | 0.0113  | 0.0037  | - |
| 0.0059 | 1   | .   |                             |        |        |        |         |         |   |
| 1983   | CB  | CB  | . ASP ASP ASP A A 265 265 . | 0.3580 | 0.4043 | 0.3980 | 0.0221  | 0.0026  |   |
| 0.0005 | 1   | .   |                             |        |        |        |         |         |   |
| 1984   | CG  | CG  | . ASP ASP ASP A A 265 265 . | 0.3988 | 0.4107 | 0.4198 | 0.0141  | -0.0014 |   |
| 0.0011 | 1   | .   |                             |        |        |        |         |         |   |
| 1985   | OD1 | OD1 | . ASP ASP ASP A A 265 265 . | 0.2932 | 0.4608 | 0.3920 | 0.0495  | -0.0336 |   |
| 0.0069 | 1   | .   |                             |        |        |        |         |         |   |
| 1986   | OD2 | OD2 | . ASP ASP ASP A A 265 265 . | 0.4445 | 0.4255 | 0.4971 | -0.0235 | 0.0105  |   |
| 0.0308 | 1   | .   |                             |        |        |        |         |         |   |
| 1987   | C   | C   | . ASP ASP ASP A A 265 265 . | 0.3555 | 0.3922 | 0.3989 | 0.0112  | 0.0021  | - |
| 0.0097 | 1   | .   |                             |        |        |        |         |         |   |
| 1988   | O   | O   | . ASP ASP ASP A A 265 265 . | 0.3384 | 0.3888 | 0.4100 | 0.0167  | -0.0048 | - |
| 0.0297 | 1   | .   |                             |        |        |        |         |         |   |
| 1989   | N   | N   | . PRO PRO PRO A A 266 266 . | 0.3391 | 0.3891 | 0.4020 | 0.0135  | -0.0003 | - |
| 0.0072 | 1   | .   |                             |        |        |        |         |         |   |
| 1990   | CA  | CA  | . PRO PRO PRO A A 266 266 . | 0.3339 | 0.3770 | 0.3849 | 0.0152  | 0.0056  | - |
| 0.0040 | 1   | .   |                             |        |        |        |         |         |   |
| 1991   | CB  | CB  | . PRO PRO PRO A A 266 266 . | 0.3267 | 0.3798 | 0.3870 | 0.0151  | -0.0033 | - |
| 0.0170 | 1   | .   |                             |        |        |        |         |         |   |
| 1992   | CG  | CG  | . PRO PRO PRO A A 266 266 . | 0.3485 | 0.3935 | 0.4043 | 0.0177  | -0.0086 | - |
| 0.0070 | 1   | .   |                             |        |        |        |         |         |   |
| 1993   | CD  | CD  | . PRO PRO PRO A A 266 266 . | 0.3601 | 0.3897 | 0.3860 | 0.0099  | 0.0010  | - |
| 0.0198 | 1   | .   |                             |        |        |        |         |         |   |
| 1994   | C   | C   | . PRO PRO PRO A A 266 266 . | 0.3286 | 0.3723 | 0.3819 | 0.0081  | 0.0103  |   |
| 0.0025 | 1   | .   |                             |        |        |        |         |         |   |
| 1995   | O   | O   | . PRO PRO PRO A A 266 266 . | 0.3188 | 0.3831 | 0.3730 | 0.0120  | 0.0329  |   |
| 0.0079 | 1   | .   |                             |        |        |        |         |         |   |
| 1996   | N   | N   | . SER SER SER A A 267 267 . | 0.3406 | 0.3617 | 0.3825 | 0.0075  | 0.0130  |   |
| 0.0058 | 1   | .   |                             |        |        |        |         |         |   |
| 1997   | CA  | CA  | . SER SER SER A A 267 267 . | 0.3296 | 0.3638 | 0.3675 | 0.0031  | 0.0130  | - |
| 0.0005 | 1   | .   |                             |        |        |        |         |         |   |
| 1998   | CB  | CB  | . SER SER SER A A 267 267 . | 0.3409 | 0.3699 | 0.3848 | -0.0115 | 0.0159  |   |
| 0.0069 | 1   | .   |                             |        |        |        |         |         |   |
| 1999   | OG  | OG  | . SER SER SER A A 267 267 . | 0.3821 | 0.4043 | 0.4248 | -0.0292 | 0.0565  |   |
| 0.0445 | 1   | .   |                             |        |        |        |         |         |   |
| 2000   | C   | C   | . SER SER SER A A 267 267 . | 0.3143 | 0.3479 | 0.3458 | 0.0088  | 0.0006  | - |
| 0.0103 | 1   | .   |                             |        |        |        |         |         |   |
| 2001   | O   | O   | . SER SER SER A A 267 267 . | 0.2828 | 0.3479 | 0.3516 | 0.0186  | 0.0055  | - |
| 0.0161 | 1   | .   |                             |        |        |        |         |         |   |

|        |     |     |                             |        |        |        |         |         |   |
|--------|-----|-----|-----------------------------|--------|--------|--------|---------|---------|---|
| 2002   | N   | N   | . ARG ARG ARG A A 268 268 . | 0.2885 | 0.3235 | 0.3289 | -0.0017 | 0.0164  | - |
| 0.0060 | 1   | .   |                             |        |        |        |         |         |   |
| 2003   | CA  | CA  | . ARG ARG ARG A A 268 268 . | 0.2694 | 0.3059 | 0.3093 | 0.0071  | 0.0108  | - |
| 0.0057 | 1   | .   |                             |        |        |        |         |         |   |
| 2004   | CB  | CB  | . ARG ARG ARG A A 268 268 . | 0.2914 | 0.3047 | 0.2914 | 0.0091  | 0.0152  | - |
| 0.0176 | 1   | .   |                             |        |        |        |         |         |   |
| 2005   | CG  | CG  | . ARG ARG ARG A A 268 268 . | 0.2174 | 0.3142 | 0.3196 | 0.0257  | 0.0129  |   |
| 0.0099 | 1   | .   |                             |        |        |        |         |         |   |
| 2006   | CD  | CD  | . ARG ARG ARG A A 268 268 . | 0.1999 | 0.2602 | 0.2461 | 0.0153  | 0.0199  | - |
| 0.0270 | 1   | .   |                             |        |        |        |         |         |   |
| 2007   | NE  | NE  | . ARG ARG ARG A A 268 268 . | 0.2190 | 0.2684 | 0.2707 | -0.0253 | 0.0313  |   |
| 0.0039 | 1   | .   |                             |        |        |        |         |         |   |
| 2008   | CZ  | CZ  | . ARG ARG ARG A A 268 268 . | 0.2207 | 0.2717 | 0.2659 | -0.0230 | 0.0186  |   |
| 0.0230 | 1   | .   |                             |        |        |        |         |         |   |
| 2009   | NH1 | NH1 | . ARG ARG ARG A A 268 268 . | 0.1814 | 0.2434 | 0.2827 | 0.0142  | 0.0350  | - |
| 0.0349 | 1   | .   |                             |        |        |        |         |         |   |
| 2010   | NH2 | NH2 | . ARG ARG ARG A A 268 268 . | 0.2369 | 0.2829 | 0.3247 | 0.0247  | 0.0198  |   |
| 0.0826 | 1   | .   |                             |        |        |        |         |         |   |
| 2011   | C   | C   | . ARG ARG ARG A A 268 268 . | 0.2599 | 0.2870 | 0.3038 | 0.0023  | 0.0137  | - |
| 0.0080 | 1   | .   |                             |        |        |        |         |         |   |
| 2012   | O   | O   | . ARG ARG ARG A A 268 268 . | 0.2330 | 0.2940 | 0.2854 | 0.0019  | 0.0188  | - |
| 0.0074 | 1   | .   |                             |        |        |        |         |         |   |
| 2013   | N   | N   | . TYR TYR TYR A A 269 269 . | 0.2125 | 0.2781 | 0.2810 | -0.0033 | 0.0023  | - |
| 0.0112 | 1   | .   |                             |        |        |        |         |         |   |
| 2014   | CA  | CA  | . TYR TYR TYR A A 269 269 . | 0.2181 | 0.2613 | 0.2713 | 0.0098  | -0.0011 | - |
| 0.0113 | 1   | .   |                             |        |        |        |         |         |   |
| 2015   | CB  | CB  | . TYR TYR TYR A A 269 269 . | 0.2470 | 0.2813 | 0.2786 | 0.0157  | 0.0113  | - |
| 0.0126 | 1   | .   |                             |        |        |        |         |         |   |
| 2016   | CG  | CG  | . TYR TYR TYR A A 269 269 . | 0.1943 | 0.2667 | 0.2802 | -0.0130 | -0.0134 | - |
| 0.0235 | 1   | .   |                             |        |        |        |         |         |   |
| 2017   | CD1 | CD1 | . TYR TYR TYR A A 269 269 . | 0.1177 | 0.3020 | 0.2955 | 0.0118  | -0.0083 | - |
| 0.0360 | 1   | .   |                             |        |        |        |         |         |   |
| 2018   | CE1 | CE1 | . TYR TYR TYR A A 269 269 . | 0.1208 | 0.2856 | 0.2844 | 0.0079  | -0.0015 | - |
| 0.0180 | 1   | .   |                             |        |        |        |         |         |   |
| 2019   | CZ  | CZ  | . TYR TYR TYR A A 269 269 . | 0.1569 | 0.3000 | 0.3067 | 0.0188  | 0.0147  | - |
| 0.0238 | 1   | .   |                             |        |        |        |         |         |   |
| 2020   | OH  | OH  | . TYR TYR TYR A A 269 269 . | 0.2370 | 0.3635 | 0.2973 | 0.0494  | 0.0108  | - |
| 0.0376 | 1   | .   |                             |        |        |        |         |         |   |
| 2021   | CE2 | CE2 | . TYR TYR TYR A A 269 269 . | 0.1864 | 0.2943 | 0.2662 | 0.0270  | 0.0173  | - |
| 0.0381 | 1   | .   |                             |        |        |        |         |         |   |
| 2022   | CD2 | CD2 | . TYR TYR TYR A A 269 269 . | 0.1783 | 0.2967 | 0.3442 | 0.0109  | -0.0038 | - |
| 0.0551 | 1   | .   |                             |        |        |        |         |         |   |
| 2023   | C   | C   | . TYR TYR TYR A A 269 269 . | 0.1991 | 0.2641 | 0.2474 | 0.0105  | -0.0110 | - |
| 0.0046 | 1   | .   |                             |        |        |        |         |         |   |
| 2024   | O   | O   | . TYR TYR TYR A A 269 269 . | 0.1639 | 0.2890 | 0.2610 | 0.0361  | -0.0157 | - |
| 0.0135 | 1   | .   |                             |        |        |        |         |         |   |
| 2025   | N   | N   | . ILE ILE ILE A A 270 270 . | 0.1764 | 0.2481 | 0.2373 | 0.0148  | -0.0274 | - |
| 0.0152 | 1   | .   |                             |        |        |        |         |         |   |
| 2026   | CA  | CA  | . ILE ILE ILE A A 270 270 . | 0.1592 | 0.2488 | 0.2324 | 0.0144  | -0.0279 | - |
| 0.0146 | 1   | .   |                             |        |        |        |         |         |   |
| 2027   | CB  | CB  | . ILE ILE ILE A A 270 270 . | 0.1564 | 0.2142 | 0.2408 | 0.0244  | -0.0363 | - |
| 0.0005 | 1   | .   |                             |        |        |        |         |         |   |
| 2028   | CG1 | CG1 | . ILE ILE ILE A A 270 270 . | 0.1415 | 0.2451 | 0.2504 | 0.0191  | -0.0256 | - |
| 0.0324 | 1   | .   |                             |        |        |        |         |         |   |
| 2029   | CD1 | CD1 | . ILE ILE ILE A A 270 270 . | 0.1153 | 0.2374 | 0.2657 | 0.0064  | -0.0039 | - |
| 0.0787 | 1   | .   |                             |        |        |        |         |         |   |
| 2030   | CG2 | CG2 | . ILE ILE ILE A A 270 270 . | 0.1933 | 0.2386 | 0.2414 | -0.0254 | -0.0178 | - |
| 0.0184 | 1   | .   |                             |        |        |        |         |         |   |
| 2031   | C   | C   | . ILE ILE ILE A A 270 270 . | 0.1701 | 0.2207 | 0.2293 | 0.0196  | -0.0380 | - |
| 0.0108 | 1   | .   |                             |        |        |        |         |         |   |

|        |     |     |                             |        |        |        |         |         |   |
|--------|-----|-----|-----------------------------|--------|--------|--------|---------|---------|---|
| 2032   | O   | O   | . ILE ILE ILE A A 270 270 . | 0.1845 | 0.2280 | 0.2414 | 0.0387  | -0.0250 | - |
| 0.0166 | 1   | .   |                             |        |        |        |         |         |   |
| 2033   | N   | N   | . THR THR THR A A 271 271 . | 0.1482 | 0.2236 | 0.1928 | 0.0323  | -0.0307 | - |
| 0.0178 | 1   | .   |                             |        |        |        |         |         |   |
| 2034   | CA  | CA  | . THR THR THR A A 271 271 . | 0.1458 | 0.2046 | 0.1891 | 0.0191  | -0.0329 | - |
| 0.0173 | 1   | .   |                             |        |        |        |         |         |   |
| 2035   | CB  | CB  | . THR THR THR A A 271 271 . | 0.1630 | 0.2132 | 0.1920 | 0.0204  | -0.0361 | - |
| 0.0349 | 1   | .   |                             |        |        |        |         |         |   |
| 2036   | OG1 | OG1 | . THR THR THR A A 271 271 . | 0.1553 | 0.2078 | 0.2319 | 0.0362  | -0.0369 | - |
| 0.0441 | 1   | .   |                             |        |        |        |         |         |   |
| 2037   | CG2 | CG2 | . THR THR THR A A 271 271 . | 0.1702 | 0.1680 | 0.1777 | 0.0290  | -0.0314 | - |
| 0.0003 | 1   | .   |                             |        |        |        |         |         |   |
| 2038   | C   | C   | . THR THR THR A A 271 271 . | 0.1672 | 0.2102 | 0.1826 | 0.0060  | -0.0305 | - |
| 0.0214 | 1   | .   |                             |        |        |        |         |         |   |
| 2039   | O   | O   | . THR THR THR A A 271 271 . | 0.1652 | 0.2000 | 0.2165 | -0.0009 | -0.0299 | - |
| 0.0189 | 1   | .   |                             |        |        |        |         |         |   |
| 2040   | N   | N   | . GLY GLY GLY A A 272 272 . | 0.1647 | 0.1861 | 0.1780 | 0.0044  | -0.0294 | - |
| 0.0197 | 1   | .   |                             |        |        |        |         |         |   |
| 2041   | CA  | CA  | . GLY GLY GLY A A 272 272 . | 0.1552 | 0.1793 | 0.1718 | 0.0031  | -0.0260 | - |
| 0.0231 | 1   | .   |                             |        |        |        |         |         |   |
| 2042   | C   | C   | . GLY GLY GLY A A 272 272 . | 0.1739 | 0.1901 | 0.2076 | 0.0111  | -0.0356 | - |
| 0.0153 | 1   | .   |                             |        |        |        |         |         |   |
| 2043   | O   | O   | . GLY GLY GLY A A 272 272 . | 0.1599 | 0.1813 | 0.1979 | 0.0245  | -0.0455 | - |
| 0.0009 | 1   | .   |                             |        |        |        |         |         |   |
| 2044   | N   | N   | . ASP ASP ASP A A 273 273 . | 0.1803 | 0.1974 | 0.2135 | 0.0151  | -0.0608 | - |
| 0.0093 | 1   | .   |                             |        |        |        |         |         |   |
| 2045   | CA  | CA  | . ASP ASP ASP A A 273 273 . | 0.1815 | 0.2098 | 0.2124 | 0.0167  | -0.0634 | - |
| 0.0064 | 1   | .   |                             |        |        |        |         |         |   |
| 2046   | CB  | CB  | . ASP ASP ASP A A 273 273 . | 0.1971 | 0.2216 | 0.2130 | 0.0009  | -0.0708 | - |
| 0.0036 | 1   | .   |                             |        |        |        |         |         |   |
| 2047   | CG  | CG  | . ASP ASP ASP A A 273 273 . | 0.2439 | 0.2764 | 0.2373 | -0.0120 | -0.0574 | - |
| 0.0158 | 1   | .   |                             |        |        |        |         |         |   |
| 2048   | OD1 | OD1 | . ASP ASP ASP A A 273 273 . | 0.2280 | 0.2417 | 0.3006 | 0.0016  | -0.1042 | - |
| 0.0126 | 1   | .   |                             |        |        |        |         |         |   |
| 2049   | OD2 | OD2 | . ASP ASP ASP A A 273 273 . | 0.2695 | 0.2285 | 0.2282 | -0.0029 | -0.0837 | - |
| 0.0031 | 1   | .   |                             |        |        |        |         |         |   |
| 2050   | C   | C   | . ASP ASP ASP A A 273 273 . | 0.1634 | 0.2211 | 0.2112 | -0.0021 | -0.0535 | - |
| 0.0102 | 1   | .   |                             |        |        |        |         |         |   |
| 2051   | O   | O   | . ASP ASP ASP A A 273 273 . | 0.1728 | 0.2090 | 0.2284 | 0.0001  | -0.0447 | - |
| 0.0000 | 1   | .   |                             |        |        |        |         |         |   |
| 2052   | N   | N   | . GLN GLN GLN A A 274 274 . | 0.1479 | 0.2134 | 0.2042 | 0.0108  | -0.0557 | - |
| 0.0043 | 1   | .   |                             |        |        |        |         |         |   |
| 2053   | CA  | CA  | . GLN GLN GLN A A 274 274 . | 0.1396 | 0.2133 | 0.2173 | 0.0234  | -0.0494 | - |
| 0.0046 | 1   | .   |                             |        |        |        |         |         |   |
| 2054   | CB  | CB  | . GLN GLN GLN A A 274 274 . | 0.1157 | 0.2394 | 0.2311 | 0.0284  | -0.0432 | - |
| 0.0065 | 1   | .   |                             |        |        |        |         |         |   |
| 2055   | CG  | CG  | . GLN GLN GLN A A 274 274 . | 0.0959 | 0.2992 | 0.2411 | 0.0079  | -0.0461 | - |
| 0.0017 | 1   | .   |                             |        |        |        |         |         |   |
| 2056   | CD  | CD  | . GLN GLN GLN A A 274 274 . | 0.1527 | 0.2742 | 0.2535 | 0.0206  | -0.0247 | - |
| 0.0306 | 1   | .   |                             |        |        |        |         |         |   |
| 2057   | OE1 | OE1 | . GLN GLN GLN A A 274 274 . | 0.1469 | 0.2316 | 0.2961 | 0.0244  | -0.0754 | - |
| 0.0358 | 1   | .   |                             |        |        |        |         |         |   |
| 2058   | NE2 | NE2 | . GLN GLN GLN A A 274 274 . | 0.2106 | 0.2086 | 0.2895 | -0.0173 | -0.0364 | - |
| 0.0561 | 1   | .   |                             |        |        |        |         |         |   |
| 2059   | C   | C   | . GLN GLN GLN A A 274 274 . | 0.1442 | 0.1925 | 0.2280 | 0.0226  | -0.0484 | - |
| 0.0150 | 1   | .   |                             |        |        |        |         |         |   |
| 2060   | O   | O   | . GLN GLN GLN A A 274 274 . | 0.1713 | 0.1996 | 0.2310 | 0.0421  | -0.0498 | - |
| 0.0033 | 1   | .   |                             |        |        |        |         |         |   |
| 2061   | N   | N   | . LEU LEU LEU A A 275 275 . | 0.1462 | 0.1732 | 0.1928 | 0.0068  | -0.0504 | - |
| 0.0093 | 1   | .   |                             |        |        |        |         |         |   |



|          |     |                             |        |        |        |         |         |   |
|----------|-----|-----------------------------|--------|--------|--------|---------|---------|---|
| 2092 CZ  | CZ  | . TYR TYR TYR A A 279 279 . | 0.1261 | 0.1505 | 0.1413 | 0.0360  | 0.0018  | - |
| 0.0188   | 1 . |                             |        |        |        |         |         |   |
| 2093 OH  | OH  | . TYR TYR TYR A A 279 279 . | 0.1432 | 0.1741 | 0.1602 | -0.0008 | -0.0497 | - |
| 0.0376   | 1 . |                             |        |        |        |         |         |   |
| 2094 CE2 | CE2 | . TYR TYR TYR A A 279 279 . | 0.0885 | 0.1517 | 0.1502 | 0.0221  | -0.0055 | - |
| 0.0383   | 1 . |                             |        |        |        |         |         |   |
| 2095 CD2 | CD2 | . TYR TYR TYR A A 279 279 . | 0.0716 | 0.1377 | 0.1447 | -0.0319 | -0.0153 | - |
| 0.0315   | 1 . |                             |        |        |        |         |         |   |
| 2096 C   | C   | . TYR TYR TYR A A 279 279 . | 0.1552 | 0.1652 | 0.1460 | 0.0206  | -0.0154 | - |
| 0.0326   | 1 . |                             |        |        |        |         |         |   |
| 2097 O   | O   | . TYR TYR TYR A A 279 279 . | 0.1522 | 0.1956 | 0.1443 | 0.0163  | -0.0055 | - |
| 0.0553   | 1 . |                             |        |        |        |         |         |   |
| 2098 N   | N   | . GLN GLN GLN A A 280 280 . | 0.1335 | 0.1477 | 0.1465 | 0.0314  | -0.0259 | - |
| 0.0139   | 1 . |                             |        |        |        |         |         |   |
| 2099 CA  | CA  | . GLN GLN GLN A A 280 280 . | 0.1578 | 0.1688 | 0.1589 | 0.0175  | -0.0236 | - |
| 0.0043   | 1 . |                             |        |        |        |         |         |   |
| 2100 CB  | CB  | . GLN GLN GLN A A 280 280 . | 0.1622 | 0.1671 | 0.1718 | 0.0104  | -0.0252 | - |
| 0.0087   | 1 . |                             |        |        |        |         |         |   |
| 2101 CG  | CG  | . GLN GLN GLN A A 280 280 . | 0.2322 | 0.2000 | 0.1705 | -0.0027 | -0.0284 | - |
| 0.0148   | 1 . |                             |        |        |        |         |         |   |
| 2102 CD  | CD  | . GLN GLN GLN A A 280 280 . | 0.2482 | 0.2400 | 0.2463 | 0.0010  | -0.0224 | - |
| 0.0115   | 1 . |                             |        |        |        |         |         |   |
| 2103 OE1 | OE1 | . GLN GLN GLN A A 280 280 . | 0.2878 | 0.2971 | 0.2838 | 0.0429  | 0.0202  | - |
| 0.0156   | 1 . |                             |        |        |        |         |         |   |
| 2104 NE2 | NE2 | . GLN GLN GLN A A 280 280 . | 0.2592 | 0.2163 | 0.2546 | 0.0236  | -0.0606 | - |
| 0.0318   | 1 . |                             |        |        |        |         |         |   |
| 2105 C   | C   | . GLN GLN GLN A A 280 280 . | 0.1550 | 0.1645 | 0.1598 | 0.0012  | -0.0172 | - |
| 0.0046   | 1 . |                             |        |        |        |         |         |   |
| 2106 O   | O   | . GLN GLN GLN A A 280 280 . | 0.1443 | 0.1843 | 0.1872 | 0.0071  | -0.0231 | - |
| 0.0207   | 1 . |                             |        |        |        |         |         |   |
| 2107 N   | N   | . ASP ASP ASP A A 281 281 . | 0.1396 | 0.1816 | 0.1794 | 0.0031  | -0.0281 | - |
| 0.0194   | 1 . |                             |        |        |        |         |         |   |
| 2108 CA  | CA  | . ASP ASP ASP A A 281 281 . | 0.1526 | 0.1924 | 0.1795 | 0.0081  | -0.0341 | - |
| 0.0039   | 1 . |                             |        |        |        |         |         |   |
| 2109 CB  | CB  | . ASP ASP ASP A A 281 281 . | 0.1509 | 0.1968 | 0.2234 | 0.0000  | -0.0164 | - |
| 0.0077   | 1 . |                             |        |        |        |         |         |   |
| 2110 CG  | CG  | . ASP ASP ASP A A 281 281 . | 0.2074 | 0.2543 | 0.2441 | 0.0143  | -0.0183 | - |
| 0.0148   | 1 . |                             |        |        |        |         |         |   |
| 2111 OD1 | OD1 | . ASP ASP ASP A A 281 281 . | 0.2358 | 0.4102 | 0.3478 | -0.0171 | -0.0748 | - |
| 0.0266   | 1 . |                             |        |        |        |         |         |   |
| 2112 OD2 | OD2 | . ASP ASP ASP A A 281 281 . | 0.1604 | 0.3814 | 0.4068 | 0.0050  | 0.0166  | - |
| 0.0415   | 1 . |                             |        |        |        |         |         |   |
| 2113 C   | C   | . ASP ASP ASP A A 281 281 . | 0.1545 | 0.1858 | 0.2049 | 0.0158  | -0.0341 | - |
| 0.0091   | 1 . |                             |        |        |        |         |         |   |
| 2114 O   | O   | . ASP ASP ASP A A 281 281 . | 0.1655 | 0.1669 | 0.2024 | -0.0041 | -0.0329 | - |
| 0.0047   | 1 . |                             |        |        |        |         |         |   |
| 2115 N   | N   | . PHE PHE PHE A A 282 282 . | 0.1363 | 0.1660 | 0.1664 | -0.0006 | -0.0311 | - |
| 0.0097   | 1 . |                             |        |        |        |         |         |   |
| 2116 CA  | CA  | . PHE PHE PHE A A 282 282 . | 0.1442 | 0.1728 | 0.1691 | 0.0015  | -0.0160 | - |
| 0.0002   | 1 . |                             |        |        |        |         |         |   |
| 2117 CB  | CB  | . PHE PHE PHE A A 282 282 . | 0.1696 | 0.1806 | 0.1491 | 0.0104  | -0.0130 | - |
| 0.0132   | 1 . |                             |        |        |        |         |         |   |
| 2118 CG  | CG  | . PHE PHE PHE A A 282 282 . | 0.1541 | 0.1877 | 0.1983 | 0.0237  | -0.0207 | - |
| 0.0115   | 1 . |                             |        |        |        |         |         |   |
| 2119 CD1 | CD1 | . PHE PHE PHE A A 282 282 . | 0.1297 | 0.2496 | 0.1751 | 0.0262  | -0.0490 | - |
| 0.0044   | 1 . |                             |        |        |        |         |         |   |
| 2120 CE1 | CE1 | . PHE PHE PHE A A 282 282 . | 0.1758 | 0.2705 | 0.2354 | 0.0258  | -0.0368 | - |
| 0.0398   | 1 . |                             |        |        |        |         |         |   |
| 2121 CZ  | CZ  | . PHE PHE PHE A A 282 282 . | 0.1732 | 0.2478 | 0.2180 | 0.0342  | -0.0329 | - |
| 0.0001   | 1 . |                             |        |        |        |         |         |   |





|        |     |     |                             |        |        |        |         |         |   |
|--------|-----|-----|-----------------------------|--------|--------|--------|---------|---------|---|
| 2152   | N   | N   | . TYR TYR TYR A A 286 286 . | 0.1579 | 0.1367 | 0.1731 | 0.0022  | -0.0283 | - |
| 0.0128 | 1   | .   |                             |        |        |        |         |         |   |
| 2153   | CA  | CA  | . TYR TYR TYR A A 286 286 . | 0.1505 | 0.1631 | 0.1705 | 0.0054  | -0.0230 | - |
| 0.0050 | 1   | .   |                             |        |        |        |         |         |   |
| 2154   | CB  | CB  | . TYR TYR TYR A A 286 286 . | 0.1484 | 0.1477 | 0.1382 | 0.0288  | -0.0196 | - |
| 0.0064 | 1   | .   |                             |        |        |        |         |         |   |
| 2155   | CG  | CG  | . TYR TYR TYR A A 286 286 . | 0.1520 | 0.1406 | 0.1876 | 0.0099  | -0.0346 | - |
| 0.0022 | 1   | .   |                             |        |        |        |         |         |   |
| 2156   | CD1 | CD1 | . TYR TYR TYR A A 286 286 . | 0.2195 | 0.1664 | 0.1273 | -0.0330 | -0.0024 | - |
| 0.0363 | 1   | .   |                             |        |        |        |         |         |   |
| 2157   | CE1 | CE1 | . TYR TYR TYR A A 286 286 . | 0.1989 | 0.1796 | 0.2280 | -0.0847 | 0.0078  | - |
| 0.0305 | 1   | .   |                             |        |        |        |         |         |   |
| 2158   | CZ  | CZ  | . TYR TYR TYR A A 286 286 . | 0.2151 | 0.2179 | 0.2637 | -0.0550 | -0.0031 | - |
| 0.0144 | 1   | .   |                             |        |        |        |         |         |   |
| 2159   | OH  | OH  | . TYR TYR TYR A A 286 286 . | 0.2919 | 0.3079 | 0.2417 | -0.0910 | 0.0400  | - |
| 0.0321 | 1   | .   |                             |        |        |        |         |         |   |
| 2160   | CE2 | CE2 | . TYR TYR TYR A A 286 286 . | 0.2026 | 0.2148 | 0.1807 | -0.0294 | -0.0304 | - |
| 0.0132 | 1   | .   |                             |        |        |        |         |         |   |
| 2161   | CD2 | CD2 | . TYR TYR TYR A A 286 286 . | 0.1933 | 0.2178 | 0.1651 | -0.0238 | -0.0227 | - |
| 0.0351 | 1   | .   |                             |        |        |        |         |         |   |
| 2162   | C   | C   | . TYR TYR TYR A A 286 286 . | 0.1540 | 0.1467 | 0.1616 | 0.0041  | -0.0178 | - |
| 0.0101 | 1   | .   |                             |        |        |        |         |         |   |
| 2163   | O   | O   | . TYR TYR TYR A A 286 286 . | 0.1535 | 0.1761 | 0.1615 | 0.0074  | -0.0406 | - |
| 0.0143 | 1   | .   |                             |        |        |        |         |         |   |
| 2164   | N   | N   | . PRO PRO PRO A A 287 287 . | 0.1412 | 0.1376 | 0.1525 | 0.0048  | -0.0129 | - |
| 0.0123 | 1   | .   |                             |        |        |        |         |         |   |
| 2165   | CA  | CA  | . PRO PRO PRO A A 287 287 . | 0.1312 | 0.1303 | 0.1681 | 0.0035  | -0.0034 | - |
| 0.0089 | 1   | .   |                             |        |        |        |         |         |   |
| 2166   | CB  | CB  | . PRO PRO PRO A A 287 287 . | 0.1200 | 0.1414 | 0.1477 | 0.0186  | -0.0177 | - |
| 0.0010 | 1   | .   |                             |        |        |        |         |         |   |
| 2167   | CG  | CG  | . PRO PRO PRO A A 287 287 . | 0.0902 | 0.1358 | 0.1582 | -0.0033 | -0.0013 | - |
| 0.0156 | 1   | .   |                             |        |        |        |         |         |   |
| 2168   | CD  | CD  | . PRO PRO PRO A A 287 287 . | 0.1472 | 0.1440 | 0.1664 | -0.0070 | -0.0237 | - |
| 0.0008 | 1   | .   |                             |        |        |        |         |         |   |
| 2169   | C   | C   | . PRO PRO PRO A A 287 287 . | 0.1194 | 0.1189 | 0.1330 | 0.0030  | -0.0033 | - |
| 0.0269 | 1   | .   |                             |        |        |        |         |         |   |
| 2170   | O   | O   | . PRO PRO PRO A A 287 287 . | 0.1195 | 0.1128 | 0.1661 | 0.0081  | 0.0032  | - |
| 0.0359 | 1   | .   |                             |        |        |        |         |         |   |
| 2171   | N   | N   | . VAL VAL VAL A A 288 288 . | 0.1110 | 0.1188 | 0.1268 | 0.0054  | -0.0207 | - |
| 0.0184 | 1   | .   |                             |        |        |        |         |         |   |
| 2172   | CA  | CA  | . VAL VAL VAL A A 288 288 . | 0.1001 | 0.1213 | 0.1408 | 0.0063  | -0.0080 | - |
| 0.0136 | 1   | .   |                             |        |        |        |         |         |   |
| 2173   | CB  | CB  | . VAL VAL VAL A A 288 288 . | 0.0985 | 0.1050 | 0.1409 | 0.0004  | 0.0081  | - |
| 0.0036 | 1   | .   |                             |        |        |        |         |         |   |
| 2174   | CG1 | CG1 | . VAL VAL VAL A A 288 288 . | 0.1367 | 0.1131 | 0.1643 | 0.0044  | -0.0372 | - |
| 0.0466 | 1   | .   |                             |        |        |        |         |         |   |
| 2175   | CG2 | CG2 | . VAL VAL VAL A A 288 288 . | 0.0986 | 0.1047 | 0.0914 | 0.0017  | 0.0104  | - |
| 0.0111 | 1   | .   |                             |        |        |        |         |         |   |
| 2176   | C   | C   | . VAL VAL VAL A A 288 288 . | 0.1362 | 0.1475 | 0.1392 | -0.0011 | -0.0136 | - |
| 0.0004 | 1   | .   |                             |        |        |        |         |         |   |
| 2177   | O   | O   | . VAL VAL VAL A A 288 288 . | 0.1511 | 0.1856 | 0.1530 | 0.0070  | -0.0271 | - |
| 0.0059 | 1   | .   |                             |        |        |        |         |         |   |
| 2178   | N   | N   | . VAL VAL VAL A A 289 289 . | 0.1158 | 0.1193 | 0.1410 | 0.0006  | -0.0201 | - |
| 0.0106 | 1   | .   |                             |        |        |        |         |         |   |
| 2179   | CA  | CA  | . VAL VAL VAL A A 289 289 . | 0.1160 | 0.1138 | 0.1416 | 0.0017  | 0.0011  | - |
| 0.0225 | 1   | .   |                             |        |        |        |         |         |   |
| 2180   | CB  | CB  | . VAL VAL VAL A A 289 289 . | 0.1115 | 0.1196 | 0.1486 | 0.0147  | -0.0190 | - |
| 0.0229 | 1   | .   |                             |        |        |        |         |         |   |
| 2181   | CG1 | CG1 | . VAL VAL VAL A A 289 289 . | 0.1767 | 0.1222 | 0.1437 | -0.0034 | 0.0148  | - |
| 0.0089 | 1   | .   |                             |        |        |        |         |         |   |





|        |     |     |                             |        |        |        |         |         |   |
|--------|-----|-----|-----------------------------|--------|--------|--------|---------|---------|---|
| 2242   | N   | N   | . GLN GLN GLN A A 297 297 . | 0.1264 | 0.1219 | 0.1305 | 0.0074  | -0.0219 | - |
| 0.0087 | 1   | .   |                             |        |        |        |         |         |   |
| 2243   | CA  | CA  | . GLN GLN GLN A A 297 297 . | 0.1319 | 0.1491 | 0.1480 | 0.0096  | -0.0190 | - |
| 0.0097 | 1   | .   |                             |        |        |        |         |         |   |
| 2244   | CB  | CB  | . GLN GLN GLN A A 297 297 . | 0.1530 | 0.1507 | 0.1332 | 0.0004  | -0.0251 | - |
| 0.0164 | 1   | .   |                             |        |        |        |         |         |   |
| 2245   | CG  | CG  | . GLN GLN GLN A A 297 297 . | 0.1172 | 0.1195 | 0.1117 | 0.0076  | -0.0106 | - |
| 0.0162 | 1   | .   |                             |        |        |        |         |         |   |
| 2246   | CD  | CD  | . GLN GLN GLN A A 297 297 . | 0.1354 | 0.1243 | 0.1138 | -0.0022 | 0.0191  | - |
| 0.0122 | 1   | .   |                             |        |        |        |         |         |   |
| 2247   | OE1 | OE1 | . GLN GLN GLN A A 297 297 . | 0.1949 | 0.1847 | 0.1858 | -0.0014 | -0.0223 | - |
| 0.0068 | 1   | .   |                             |        |        |        |         |         |   |
| 2248   | NE2 | NE2 | . GLN GLN GLN A A 297 297 . | 0.1155 | 0.1301 | 0.1495 | -0.0264 | 0.0340  |   |
| 0.0005 | 1   | .   |                             |        |        |        |         |         |   |
| 2249   | C   | C   | . GLN GLN GLN A A 297 297 . | 0.1622 | 0.1823 | 0.1542 | 0.0024  | -0.0162 |   |
| 0.0027 | 1   | .   |                             |        |        |        |         |         |   |
| 2250   | O   | O   | . GLN GLN GLN A A 297 297 . | 0.1665 | 0.1898 | 0.1464 | 0.0090  | -0.0008 |   |
| 0.0102 | 1   | .   |                             |        |        |        |         |         |   |
| 2251   | N   | N   | . ASP ASP ASP A A 298 298 . | 0.1588 | 0.1639 | 0.1582 | 0.0248  | -0.0354 | - |
| 0.0164 | 1   | .   |                             |        |        |        |         |         |   |
| 2252   | CA  | CA  | . ASP ASP ASP A A 298 298 . | 0.1823 | 0.1940 | 0.2013 | 0.0133  | -0.0332 |   |
| 0.0074 | 1   | .   |                             |        |        |        |         |         |   |
| 2253   | CB  | CB  | . ASP ASP ASP A A 298 298 . | 0.2071 | 0.1622 | 0.1956 | 0.0365  | -0.0381 | - |
| 0.0046 | 1   | .   |                             |        |        |        |         |         |   |
| 2254   | CG  | CG  | . ASP ASP ASP A A 298 298 . | 0.2523 | 0.2599 | 0.2775 | -0.0168 | -0.0125 |   |
| 0.0205 | 1   | .   |                             |        |        |        |         |         |   |
| 2255   | OD1 | OD1 | . ASP ASP ASP A A 298 298 . | 0.1753 | 0.2122 | 0.2746 | -0.0083 | -0.0701 |   |
| 0.0446 | 1   | .   |                             |        |        |        |         |         |   |
| 2256   | OD2 | OD2 | . ASP ASP ASP A A 298 298 . | 0.3323 | 0.2811 | 0.2490 | -0.0142 | -0.0514 |   |
| 0.0396 | 1   | .   |                             |        |        |        |         |         |   |
| 2257   | C   | C   | . ASP ASP ASP A A 298 298 . | 0.2042 | 0.1869 | 0.2073 | 0.0267  | -0.0466 |   |
| 0.0057 | 1   | .   |                             |        |        |        |         |         |   |
| 2258   | O   | O   | . ASP ASP ASP A A 298 298 . | 0.1709 | 0.1867 | 0.2242 | 0.0506  | -0.0454 |   |
| 0.0157 | 1   | .   |                             |        |        |        |         |         |   |
| 2259   | N   | N   | . ASP ASP ASP A A 299 299 . | 0.1720 | 0.1904 | 0.1943 | 0.0025  | -0.0489 |   |
| 0.0053 | 1   | .   |                             |        |        |        |         |         |   |
| 2260   | CA  | CA  | . ASP ASP ASP A A 299 299 . | 0.1828 | 0.1928 | 0.1844 | 0.0073  | -0.0265 | - |
| 0.0026 | 1   | .   |                             |        |        |        |         |         |   |
| 2261   | CB  | CB  | . ASP ASP ASP A A 299 299 . | 0.2048 | 0.2106 | 0.2034 | -0.0026 | -0.0393 | - |
| 0.0108 | 1   | .   |                             |        |        |        |         |         |   |
| 2262   | CG  | CG  | . ASP ASP ASP A A 299 299 . | 0.1650 | 0.2246 | 0.2096 | 0.0027  | -0.0129 | - |
| 0.0059 | 1   | .   |                             |        |        |        |         |         |   |
| 2263   | OD1 | OD1 | . ASP ASP ASP A A 299 299 . | 0.2444 | 0.2125 | 0.2169 | 0.0800  | -0.0581 | - |
| 0.0354 | 1   | .   |                             |        |        |        |         |         |   |
| 2264   | OD2 | OD2 | . ASP ASP ASP A A 299 299 . | 0.1667 | 0.1744 | 0.2155 | 0.0098  | -0.0549 | - |
| 0.0404 | 1   | .   |                             |        |        |        |         |         |   |
| 2265   | C   | C   | . ASP ASP ASP A A 299 299 . | 0.1925 | 0.1959 | 0.1941 | 0.0203  | -0.0319 | - |
| 0.0013 | 1   | .   |                             |        |        |        |         |         |   |
| 2266   | O   | O   | . ASP ASP ASP A A 299 299 . | 0.2075 | 0.1913 | 0.1881 | 0.0365  | -0.0651 | - |
| 0.0035 | 1   | .   |                             |        |        |        |         |         |   |
| 2267   | N   | N   | . TRP TRP TRP A A 300 300 . | 0.1694 | 0.1793 | 0.1789 | 0.0312  | -0.0223 |   |
| 0.0142 | 1   | .   |                             |        |        |        |         |         |   |
| 2268   | CA  | CA  | . TRP TRP TRP A A 300 300 . | 0.1820 | 0.1821 | 0.1977 | 0.0133  | -0.0118 |   |
| 0.0122 | 1   | .   |                             |        |        |        |         |         |   |
| 2269   | CB  | CB  | . TRP TRP TRP A A 300 300 . | 0.1828 | 0.1849 | 0.2095 | 0.0029  | -0.0143 | - |
| 0.0039 | 1   | .   |                             |        |        |        |         |         |   |
| 2270   | CG  | CG  | . TRP TRP TRP A A 300 300 . | 0.1990 | 0.1934 | 0.2012 | -0.0105 | 0.0080  | - |
| 0.0064 | 1   | .   |                             |        |        |        |         |         |   |
| 2271   | CD1 | CD1 | . TRP TRP TRP A A 300 300 . | 0.2020 | 0.1517 | 0.1718 | 0.0029  | 0.0068  |   |
| 0.0019 | 1   | .   |                             |        |        |        |         |         |   |





|        |     |     |                             |        |        |        |         |         |   |
|--------|-----|-----|-----------------------------|--------|--------|--------|---------|---------|---|
| 2332   | CA  | CA  | . THR THR THR A A 307 307 . | 0.1806 | 0.1811 | 0.1757 | 0.0320  | -0.0242 |   |
| 0.0079 | 1   | .   |                             |        |        |        |         |         |   |
| 2333   | CB  | CB  | . THR THR THR A A 307 307 . | 0.1947 | 0.2090 | 0.1894 | 0.0224  | -0.0055 |   |
| 0.0035 | 1   | .   |                             |        |        |        |         |         |   |
| 2334   | OG1 | OG1 | . THR THR THR A A 307 307 . | 0.1909 | 0.2065 | 0.1461 | 0.0414  | -0.0380 | - |
| 0.0030 | 1   | .   |                             |        |        |        |         |         |   |
| 2335   | CG2 | CG2 | . THR THR THR A A 307 307 . | 0.1743 | 0.2277 | 0.1781 | -0.0065 | -0.0263 | - |
| 0.0087 | 1   | .   |                             |        |        |        |         |         |   |
| 2336   | C   | C   | . THR THR THR A A 307 307 . | 0.1942 | 0.1888 | 0.1794 | 0.0441  | -0.0213 |   |
| 0.0035 | 1   | .   |                             |        |        |        |         |         |   |
| 2337   | O   | O   | . THR THR THR A A 307 307 . | 0.1476 | 0.1805 | 0.1480 | 0.0383  | -0.0273 |   |
| 0.0133 | 1   | .   |                             |        |        |        |         |         |   |
| 2338   | N   | N   | . ALA ALA ALA A A 308 308 . | 0.2050 | 0.1985 | 0.1835 | 0.0419  | -0.0302 | - |
| 0.0088 | 1   | .   |                             |        |        |        |         |         |   |
| 2339   | CA  | CA  | . ALA ALA ALA A A 308 308 . | 0.2315 | 0.2112 | 0.2013 | 0.0318  | -0.0317 | - |
| 0.0142 | 1   | .   |                             |        |        |        |         |         |   |
| 2340   | CB  | CB  | . ALA ALA ALA A A 308 308 . | 0.2574 | 0.2055 | 0.2186 | 0.0387  | -0.0198 | - |
| 0.0001 | 1   | .   |                             |        |        |        |         |         |   |
| 2341   | C   | C   | . ALA ALA ALA A A 308 308 . | 0.2517 | 0.2302 | 0.2200 | 0.0394  | -0.0182 | - |
| 0.0149 | 1   | .   |                             |        |        |        |         |         |   |
| 2342   | O   | O   | . ALA ALA ALA A A 308 308 . | 0.2865 | 0.2519 | 0.2190 | 0.0401  | -0.0223 | - |
| 0.0580 | 1   | .   |                             |        |        |        |         |         |   |
| 2343   | N   | N   | . ASN ASN ASN A A 309 309 . | 0.2323 | 0.2240 | 0.2169 | 0.0325  | -0.0047 | - |
| 0.0132 | 1   | .   |                             |        |        |        |         |         |   |
| 2344   | CA  | CA  | . ASN ASN ASN A A 309 309 . | 0.2434 | 0.2511 | 0.2315 | 0.0068  | -0.0226 | - |
| 0.0118 | 1   | .   |                             |        |        |        |         |         |   |
| 2345   | CB  | CB  | . ASN ASN ASN A A 309 309 . | 0.2639 | 0.2900 | 0.2703 | 0.0089  | -0.0173 | - |
| 0.0143 | 1   | .   |                             |        |        |        |         |         |   |
| 2346   | CG  | CG  | . ASN ASN ASN A A 309 309 . | 0.2931 | 0.4335 | 0.3124 | -0.0006 | -0.0334 | - |
| 0.0000 | 1   | .   |                             |        |        |        |         |         |   |
| 2347   | OD1 | OD1 | . ASN ASN ASN A A 309 309 . | 0.3261 | 0.5092 | 0.3826 | 0.0118  | 0.0256  |   |
| 0.0671 | 1   | .   |                             |        |        |        |         |         |   |
| 2348   | ND2 | ND2 | . ASN ASN ASN A A 309 309 . | 0.4155 | 0.5038 | 0.3510 | -0.0488 | 0.0072  |   |
| 0.0359 | 1   | .   |                             |        |        |        |         |         |   |
| 2349   | C   | C   | . ASN ASN ASN A A 309 309 . | 0.2264 | 0.2316 | 0.2368 | 0.0056  | -0.0289 | - |
| 0.0122 | 1   | .   |                             |        |        |        |         |         |   |
| 2350   | O   | O   | . ASN ASN ASN A A 309 309 . | 0.2146 | 0.2568 | 0.2455 | -0.0172 | -0.0571 | - |
| 0.0031 | 1   | .   |                             |        |        |        |         |         |   |
| 2351   | N   | N   | . VAL VAL VAL A A 310 310 . | 0.2026 | 0.1932 | 0.2188 | 0.0048  | -0.0308 | - |
| 0.0209 | 1   | .   |                             |        |        |        |         |         |   |
| 2352   | CA  | CA  | . VAL VAL VAL A A 310 310 . | 0.2151 | 0.1882 | 0.1813 | 0.0098  | -0.0305 | - |
| 0.0030 | 1   | .   |                             |        |        |        |         |         |   |
| 2353   | CB  | CB  | . VAL VAL VAL A A 310 310 . | 0.2001 | 0.1804 | 0.1897 | 0.0004  | -0.0282 | - |
| 0.0219 | 1   | .   |                             |        |        |        |         |         |   |
| 2354   | CG1 | CG1 | . VAL VAL VAL A A 310 310 . | 0.2483 | 0.2645 | 0.2194 | -0.0132 | -0.0227 | - |
| 0.0236 | 1   | .   |                             |        |        |        |         |         |   |
| 2355   | CG2 | CG2 | . VAL VAL VAL A A 310 310 . | 0.2270 | 0.1886 | 0.1995 | -0.0057 | -0.0453 | - |
| 0.0117 | 1   | .   |                             |        |        |        |         |         |   |
| 2356   | C   | C   | . VAL VAL VAL A A 310 310 . | 0.1878 | 0.1712 | 0.1593 | 0.0067  | -0.0324 | - |
| 0.0125 | 1   | .   |                             |        |        |        |         |         |   |
| 2357   | O   | O   | . VAL VAL VAL A A 310 310 . | 0.1977 | 0.1725 | 0.1392 | 0.0110  | -0.0492 | - |
| 0.0075 | 1   | .   |                             |        |        |        |         |         |   |
| 2358   | N   | N   | . GLY GLY GLY A A 311 311 . | 0.1916 | 0.1927 | 0.1416 | 0.0178  | -0.0424 | - |
| 0.0123 | 1   | .   |                             |        |        |        |         |         |   |
| 2359   | CA  | CA  | . GLY GLY GLY A A 311 311 . | 0.1831 | 0.1850 | 0.1308 | 0.0070  | -0.0315 | - |
| 0.0080 | 1   | .   |                             |        |        |        |         |         |   |
| 2360   | C   | C   | . GLY GLY GLY A A 311 311 . | 0.1784 | 0.1925 | 0.1581 | 0.0167  | -0.0220 | - |
| 0.0100 | 1   | .   |                             |        |        |        |         |         |   |
| 2361   | O   | O   | . GLY GLY GLY A A 311 311 . | 0.2049 | 0.2188 | 0.1518 | 0.0305  | 0.0149  |   |
| 0.0046 | 1   | .   |                             |        |        |        |         |         |   |

|        |     |     |                             |        |        |        |         |         |   |
|--------|-----|-----|-----------------------------|--------|--------|--------|---------|---------|---|
| 2362   | N   | N   | . ILE ILE ILE A A 312 312 . | 0.1761 | 0.1623 | 0.1284 | 0.0172  | -0.0422 | - |
| 0.0076 | 1   | .   |                             |        |        |        |         |         |   |
| 2363   | CA  | CA  | . ILE ILE ILE A A 312 312 . | 0.1672 | 0.1403 | 0.1331 | 0.0068  | -0.0262 | - |
| 0.0044 | 1   | .   |                             |        |        |        |         |         |   |
| 2364   | CB  | CB  | . ILE ILE ILE A A 312 312 . | 0.1451 | 0.1392 | 0.1276 | -0.0001 | -0.0162 | - |
| 0.0202 | 1   | .   |                             |        |        |        |         |         |   |
| 2365   | CG1 | CG1 | . ILE ILE ILE A A 312 312 . | 0.1863 | 0.2127 | 0.1604 | 0.0039  | 0.0070  |   |
| 0.0110 | 1   | .   |                             |        |        |        |         |         |   |
| 2366   | CD1 | CD1 | . ILE ILE ILE A A 312 312 . | 0.1943 | 0.2066 | 0.1680 | -0.0089 | 0.0466  |   |
| 0.0404 | 1   | .   |                             |        |        |        |         |         |   |
| 2367   | CG2 | CG2 | . ILE ILE ILE A A 312 312 . | 0.1690 | 0.1215 | 0.1606 | 0.0056  | -0.0191 | - |
| 0.0110 | 1   | .   |                             |        |        |        |         |         |   |
| 2368   | C   | C   | . ILE ILE ILE A A 312 312 . | 0.1587 | 0.1470 | 0.1191 | 0.0028  | -0.0314 | - |
| 0.0074 | 1   | .   |                             |        |        |        |         |         |   |
| 2369   | O   | O   | . ILE ILE ILE A A 312 312 . | 0.1535 | 0.1357 | 0.1162 | 0.0027  | -0.0378 | - |
| 0.0190 | 1   | .   |                             |        |        |        |         |         |   |
| 2370   | N   | N   | . GLN GLN GLN A A 313 313 . | 0.1366 | 0.1195 | 0.1170 | -0.0051 | -0.0294 | - |
| 0.0015 | 1   | .   |                             |        |        |        |         |         |   |
| 2371   | CA  | CA  | . GLN GLN GLN A A 313 313 . | 0.1149 | 0.0977 | 0.1030 | 0.0065  | -0.0237 | - |
| 0.0021 | 1   | .   |                             |        |        |        |         |         |   |
| 2372   | CB  | CB  | . GLN GLN GLN A A 313 313 . | 0.0978 | 0.1218 | 0.1200 | -0.0128 | -0.0212 | - |
| 0.0114 | 1   | .   |                             |        |        |        |         |         |   |
| 2373   | CG  | CG  | . GLN GLN GLN A A 313 313 . | 0.1018 | 0.1502 | 0.0794 | 0.0009  | -0.0265 | - |
| 0.0095 | 1   | .   |                             |        |        |        |         |         |   |
| 2374   | CD  | CD  | . GLN GLN GLN A A 313 313 . | 0.1140 | 0.1524 | 0.1182 | 0.0152  | -0.0009 | - |
| 0.0016 | 1   | .   |                             |        |        |        |         |         |   |
| 2375   | OE1 | OE1 | . GLN GLN GLN A A 313 313 . | 0.1232 | 0.1550 | 0.1263 | 0.0016  | -0.0204 | - |
| 0.0069 | 1   | .   |                             |        |        |        |         |         |   |
| 2376   | NE2 | NE2 | . GLN GLN GLN A A 313 313 . | 0.1264 | 0.1173 | 0.1110 | 0.0050  | 0.0052  | - |
| 0.0049 | 1   | .   |                             |        |        |        |         |         |   |
| 2377   | C   | C   | . GLN GLN GLN A A 313 313 . | 0.1041 | 0.0998 | 0.1003 | 0.0032  | -0.0100 | - |
| 0.0092 | 1   | .   |                             |        |        |        |         |         |   |
| 2378   | O   | O   | . GLN GLN GLN A A 313 313 . | 0.0789 | 0.1168 | 0.1065 | -0.0017 | -0.0106 | - |
| 0.0061 | 1   | .   |                             |        |        |        |         |         |   |
| 2379   | N   | N   | . ILE ILE ILE A A 314 314 . | 0.0955 | 0.0997 | 0.0862 | 0.0142  | -0.0178 | - |
| 0.0122 | 1   | .   |                             |        |        |        |         |         |   |
| 2380   | CA  | CA  | . ILE ILE ILE A A 314 314 . | 0.1180 | 0.1189 | 0.1153 | 0.0158  | -0.0267 | - |
| 0.0149 | 1   | .   |                             |        |        |        |         |         |   |
| 2381   | CB  | CB  | . ILE ILE ILE A A 314 314 . | 0.0978 | 0.1323 | 0.1237 | 0.0071  | -0.0287 | - |
| 0.0121 | 1   | .   |                             |        |        |        |         |         |   |
| 2382   | CG1 | CG1 | . ILE ILE ILE A A 314 314 . | 0.1527 | 0.1386 | 0.1392 | -0.0029 | 0.0075  | - |
| 0.0095 | 1   | .   |                             |        |        |        |         |         |   |
| 2383   | CD1 | CD1 | . ILE ILE ILE A A 314 314 . | 0.1676 | 0.1728 | 0.1988 | 0.0054  | 0.0362  |   |
| 0.0305 | 1   | .   |                             |        |        |        |         |         |   |
| 2384   | CG2 | CG2 | . ILE ILE ILE A A 314 314 . | 0.1579 | 0.1458 | 0.1360 | 0.0354  | -0.0235 | - |
| 0.0114 | 1   | .   |                             |        |        |        |         |         |   |
| 2385   | C   | C   | . ILE ILE ILE A A 314 314 . | 0.1065 | 0.1112 | 0.1111 | -0.0018 | -0.0185 | - |
| 0.0029 | 1   | .   |                             |        |        |        |         |         |   |
| 2386   | O   | O   | . ILE ILE ILE A A 314 314 . | 0.1177 | 0.1383 | 0.1120 | 0.0136  | -0.0297 | - |
| 0.0110 | 1   | .   |                             |        |        |        |         |         |   |
| 2387   | N   | N   | . VAL VAL VAL A A 315 315 . | 0.0995 | 0.1082 | 0.0839 | 0.0246  | -0.0261 | - |
| 0.0141 | 1   | .   |                             |        |        |        |         |         |   |
| 2388   | CA  | CA  | . VAL VAL VAL A A 315 315 . | 0.1112 | 0.0930 | 0.1198 | 0.0118  | -0.0108 | - |
| 0.0059 | 1   | .   |                             |        |        |        |         |         |   |
| 2389   | CB  | CB  | . VAL VAL VAL A A 315 315 . | 0.1110 | 0.1104 | 0.0865 | 0.0238  | -0.0359 | - |
| 0.0154 | 1   | .   |                             |        |        |        |         |         |   |
| 2390   | CG1 | CG1 | . VAL VAL VAL A A 315 315 . | 0.0887 | 0.1384 | 0.1683 | 0.0054  | 0.0017  | - |
| 0.0002 | 1   | .   |                             |        |        |        |         |         |   |
| 2391   | CG2 | CG2 | . VAL VAL VAL A A 315 315 . | 0.0964 | 0.0801 | 0.1231 | 0.0107  | 0.0109  | - |
| 0.0059 | 1   | .   |                             |        |        |        |         |         |   |



|        |     |     |                             |        |        |        |         |         |   |
|--------|-----|-----|-----------------------------|--------|--------|--------|---------|---------|---|
| 2392   | C   | C   | . VAL VAL VAL A A 315 315 . | 0.1081 | 0.0999 | 0.1027 | 0.0106  | -0.0055 | - |
| 0.0077 | 1   | .   |                             |        |        |        |         |         |   |
| 2393   | O   | O   | . VAL VAL VAL A A 315 315 . | 0.0956 | 0.0929 | 0.1233 | 0.0117  | -0.0041 | - |
| 0.0011 | 1   | .   |                             |        |        |        |         |         |   |
| 2394   | N   | N   | . GLY GLY GLY A A 316 316 . | 0.1208 | 0.0977 | 0.1218 | 0.0214  | -0.0101 | - |
| 0.0042 | 1   | .   |                             |        |        |        |         |         |   |
| 2395   | CA  | CA  | . GLY GLY GLY A A 316 316 . | 0.1373 | 0.1021 | 0.1124 | 0.0181  | -0.0149 | - |
| 0.0113 | 1   | .   |                             |        |        |        |         |         |   |
| 2396   | C   | C   | . GLY GLY GLY A A 316 316 . | 0.1381 | 0.1202 | 0.1212 | 0.0108  | -0.0107 | - |
| 0.0027 | 1   | .   |                             |        |        |        |         |         |   |
| 2397   | O   | O   | . GLY GLY GLY A A 316 316 . | 0.1203 | 0.1007 | 0.1249 | 0.0156  | -0.0241 | - |
| 0.0193 | 1   | .   |                             |        |        |        |         |         |   |
| 2398   | N   | N   | . ASP ASP ASP A A 317 317 . | 0.1292 | 0.1216 | 0.1141 | 0.0294  | -0.0087 | - |
| 0.0014 | 1   | .   |                             |        |        |        |         |         |   |
| 2399   | CA  | CA  | . ASP ASP ASP A A 317 317 . | 0.1051 | 0.0899 | 0.0906 | 0.0153  | -0.0060 | - |
| 0.0047 | 1   | .   |                             |        |        |        |         |         |   |
| 2400   | CB  | CB  | . ASP ASP ASP A A 317 317 . | 0.1304 | 0.1106 | 0.0972 | 0.0019  | 0.0004  | - |
| 0.0086 | 1   | .   |                             |        |        |        |         |         |   |
| 2401   | CG  | CG  | . ASP ASP ASP A A 317 317 . | 0.1176 | 0.0998 | 0.0912 | 0.0006  | -0.0070 | - |
| 0.0022 | 1   | .   |                             |        |        |        |         |         |   |
| 2402   | OD1 | OD1 | . ASP ASP ASP A A 317 317 . | 0.0972 | 0.1131 | 0.1397 | -0.0020 | 0.0222  | - |
| 0.0099 | 1   | .   |                             |        |        |        |         |         |   |
| 2403   | OD2 | OD2 | . ASP ASP ASP A A 317 317 . | 0.1522 | 0.1554 | 0.1079 | -0.0249 | -0.0123 | - |
| 0.0009 | 1   | .   |                             |        |        |        |         |         |   |
| 2404   | C   | C   | . ASP ASP ASP A A 317 317 . | 0.1286 | 0.1123 | 0.1136 | 0.0078  | -0.0057 | - |
| 0.0046 | 1   | .   |                             |        |        |        |         |         |   |
| 2405   | O   | O   | . ASP ASP ASP A A 317 317 . | 0.1125 | 0.1185 | 0.1045 | -0.0082 | -0.0185 | - |
| 0.0055 | 1   | .   |                             |        |        |        |         |         |   |
| 2406   | N   | N   | . ASP ASP ASP A A 318 318 . | 0.1117 | 0.1013 | 0.1229 | 0.0186  | -0.0054 | - |
| 0.0125 | 1   | .   |                             |        |        |        |         |         |   |
| 2407   | CA  | CA  | . ASP ASP ASP A A 318 318 . | 0.1227 | 0.0987 | 0.1241 | 0.0305  | 0.0044  | - |
| 0.0049 | 1   | .   |                             |        |        |        |         |         |   |
| 2408   | CB  | CB  | . ASP ASP ASP A A 318 318 . | 0.1244 | 0.1077 | 0.1314 | 0.0349  | -0.0073 | - |
| 0.0059 | 1   | .   |                             |        |        |        |         |         |   |
| 2409   | CG  | CG  | . ASP ASP ASP A A 318 318 . | 0.1436 | 0.1163 | 0.1383 | 0.0169  | 0.0025  | - |
| 0.0022 | 1   | .   |                             |        |        |        |         |         |   |
| 2410   | OD1 | OD1 | . ASP ASP ASP A A 318 318 . | 0.1394 | 0.1392 | 0.1356 | 0.0161  | 0.0058  | - |
| 0.0196 | 1   | .   |                             |        |        |        |         |         |   |
| 2411   | OD2 | OD2 | . ASP ASP ASP A A 318 318 . | 0.1192 | 0.1215 | 0.1248 | 0.0054  | -0.0089 | - |
| 0.0039 | 1   | .   |                             |        |        |        |         |         |   |
| 2412   | C   | C   | . ASP ASP ASP A A 318 318 . | 0.1288 | 0.1120 | 0.1170 | 0.0118  | -0.0029 | - |
| 0.0101 | 1   | .   |                             |        |        |        |         |         |   |
| 2413   | O   | O   | . ASP ASP ASP A A 318 318 . | 0.1389 | 0.1455 | 0.1601 | 0.0095  | 0.0003  | - |
| 0.0107 | 1   | .   |                             |        |        |        |         |         |   |
| 2414   | N   | N   | . LEU LEU LEU A A 319 319 . | 0.1135 | 0.1319 | 0.1029 | 0.0197  | -0.0063 | - |
| 0.0048 | 1   | .   |                             |        |        |        |         |         |   |
| 2415   | CA  | CA  | . LEU LEU LEU A A 319 319 . | 0.1221 | 0.1252 | 0.0888 | 0.0060  | -0.0066 | - |
| 0.0102 | 1   | .   |                             |        |        |        |         |         |   |
| 2416   | CB  | CB  | . LEU LEU LEU A A 319 319 . | 0.1271 | 0.1096 | 0.1093 | 0.0199  | -0.0106 | - |
| 0.0160 | 1   | .   |                             |        |        |        |         |         |   |
| 2417   | CG  | CG  | . LEU LEU LEU A A 319 319 . | 0.0967 | 0.1127 | 0.0986 | 0.0400  | -0.0365 | - |
| 0.0185 | 1   | .   |                             |        |        |        |         |         |   |
| 2418   | CD1 | CD1 | . LEU LEU LEU A A 319 319 . | 0.1123 | 0.1731 | 0.1649 | 0.0428  | 0.0015  | - |
| 0.0181 | 1   | .   |                             |        |        |        |         |         |   |
| 2419   | CD2 | CD2 | . LEU LEU LEU A A 319 319 . | 0.1600 | 0.1518 | 0.1294 | 0.0636  | -0.0159 | - |
| 0.0241 | 1   | .   |                             |        |        |        |         |         |   |
| 2420   | C   | C   | . LEU LEU LEU A A 319 319 . | 0.1481 | 0.1284 | 0.1105 | 0.0099  | -0.0107 | - |
| 0.0164 | 1   | .   |                             |        |        |        |         |         |   |
| 2421   | O   | O   | . LEU LEU LEU A A 319 319 . | 0.1397 | 0.1189 | 0.1230 | 0.0106  | 0.0014  | - |
| 0.0009 | 1   | .   |                             |        |        |        |         |         |   |

|        |     |     |                             |        |        |        |         |         |   |
|--------|-----|-----|-----------------------------|--------|--------|--------|---------|---------|---|
| 2422   | N   | N   | . THR THR THR A A 320 320 . | 0.1177 | 0.1131 | 0.0970 | 0.0108  | -0.0183 | - |
| 0.0101 | 1   | .   |                             |        |        |        |         |         |   |
| 2423   | CA  | CA  | . THR THR THR A A 320 320 . | 0.1400 | 0.1165 | 0.1096 | 0.0018  | -0.0042 | - |
| 0.0082 | 1   | .   |                             |        |        |        |         |         |   |
| 2424   | CB  | CB  | . THR THR THR A A 320 320 . | 0.1398 | 0.1277 | 0.1326 | 0.0106  | -0.0134 |   |
| 0.0054 | 1   | .   |                             |        |        |        |         |         |   |
| 2425   | OG1 | OG1 | . THR THR THR A A 320 320 . | 0.2020 | 0.1113 | 0.1623 | 0.0083  | 0.0051  |   |
| 0.0167 | 1   | .   |                             |        |        |        |         |         |   |
| 2426   | CG2 | CG2 | . THR THR THR A A 320 320 . | 0.1394 | 0.1108 | 0.1385 | 0.0137  | -0.0334 |   |
| 0.0067 | 1   | .   |                             |        |        |        |         |         |   |
| 2427   | C   | C   | . THR THR THR A A 320 320 . | 0.1357 | 0.1137 | 0.1264 | 0.0080  | -0.0099 |   |
| 0.0094 | 1   | .   |                             |        |        |        |         |         |   |
| 2428   | O   | O   | . THR THR THR A A 320 320 . | 0.1197 | 0.0890 | 0.1194 | 0.0010  | -0.0223 |   |
| 0.0083 | 1   | .   |                             |        |        |        |         |         |   |
| 2429   | N   | N   | . VAL VAL VAL A A 321 321 . | 0.1405 | 0.1038 | 0.1064 | 0.0216  | -0.0073 | - |
| 0.0158 | 1   | .   |                             |        |        |        |         |         |   |
| 2430   | CA  | CA  | . VAL VAL VAL A A 321 321 . | 0.1085 | 0.1066 | 0.1107 | 0.0145  | -0.0088 | - |
| 0.0002 | 1   | .   |                             |        |        |        |         |         |   |
| 2431   | CB  | CB  | . VAL VAL VAL A A 321 321 . | 0.0883 | 0.0901 | 0.1095 | 0.0153  | 0.0095  | - |
| 0.0025 | 1   | .   |                             |        |        |        |         |         |   |
| 2432   | CG1 | CG1 | . VAL VAL VAL A A 321 321 . | 0.1260 | 0.0848 | 0.1012 | 0.0397  | 0.0358  | - |
| 0.0087 | 1   | .   |                             |        |        |        |         |         |   |
| 2433   | CG2 | CG2 | . VAL VAL VAL A A 321 321 . | 0.1486 | 0.1249 | 0.1270 | 0.0319  | -0.0092 |   |
| 0.0052 | 1   | .   |                             |        |        |        |         |         |   |
| 2434   | C   | C   | . VAL VAL VAL A A 321 321 . | 0.0874 | 0.0873 | 0.0734 | 0.0040  | -0.0023 |   |
| 0.0028 | 1   | .   |                             |        |        |        |         |         |   |
| 2435   | O   | O   | . VAL VAL VAL A A 321 321 . | 0.1167 | 0.0965 | 0.0836 | 0.0171  | 0.0060  |   |
| 0.0030 | 1   | .   |                             |        |        |        |         |         |   |
| 2436   | N   | N   | . THR THR THR A A 322 322 . | 0.0888 | 0.0992 | 0.0930 | 0.0039  | -0.0155 | - |
| 0.0037 | 1   | .   |                             |        |        |        |         |         |   |
| 2437   | CA  | CA  | . THR THR THR A A 322 322 . | 0.0964 | 0.0953 | 0.0981 | 0.0177  | -0.0019 |   |
| 0.0005 | 1   | .   |                             |        |        |        |         |         |   |
| 2438   | CB  | CB  | . THR THR THR A A 322 322 . | 0.0901 | 0.0795 | 0.0818 | 0.0001  | -0.0039 |   |
| 0.0037 | 1   | .   |                             |        |        |        |         |         |   |
| 2439   | OG1 | OG1 | . THR THR THR A A 322 322 . | 0.0828 | 0.1065 | 0.1034 | 0.0202  | 0.0048  | - |
| 0.0127 | 1   | .   |                             |        |        |        |         |         |   |
| 2440   | CG2 | CG2 | . THR THR THR A A 322 322 . | 0.0931 | 0.1102 | 0.1062 | 0.0129  | -0.0064 |   |
| 0.0152 | 1   | .   |                             |        |        |        |         |         |   |
| 2441   | C   | C   | . THR THR THR A A 322 322 . | 0.1052 | 0.1049 | 0.1028 | 0.0003  | -0.0033 |   |
| 0.0019 | 1   | .   |                             |        |        |        |         |         |   |
| 2442   | O   | O   | . THR THR THR A A 322 322 . | 0.1134 | 0.1084 | 0.1149 | 0.0121  | -0.0110 |   |
| 0.0176 | 1   | .   |                             |        |        |        |         |         |   |
| 2443   | N   | N   | . ASN ASN ASN A A 323 323 . | 0.1205 | 0.1098 | 0.1039 | 0.0153  | -0.0091 |   |
| 0.0099 | 1   | .   |                             |        |        |        |         |         |   |
| 2444   | CA  | CA  | . ASN ASN ASN A A 323 323 . | 0.1602 | 0.1358 | 0.1239 | 0.0150  | 0.0081  |   |
| 0.0162 | 1   | .   |                             |        |        |        |         |         |   |
| 2445   | CB  | CB  | . ASN ASN ASN A A 323 323 . | 0.1681 | 0.1149 | 0.1315 | 0.0293  | 0.0045  |   |
| 0.0115 | 1   | .   |                             |        |        |        |         |         |   |
| 2446   | CG  | CG  | . ASN ASN ASN A A 323 323 . | 0.2470 | 0.1607 | 0.1765 | 0.0337  | 0.0285  |   |
| 0.0017 | 1   | .   |                             |        |        |        |         |         |   |
| 2447   | OD1 | OD1 | . ASN ASN ASN A A 323 323 . | 0.3499 | 0.1716 | 0.2130 | 0.0364  | 0.0517  |   |
| 0.0352 | 1   | .   |                             |        |        |        |         |         |   |
| 2448   | ND2 | ND2 | . ASN ASN ASN A A 323 323 . | 0.1844 | 0.1585 | 0.1732 | 0.0450  | -0.0078 | - |
| 0.0436 | 1   | .   |                             |        |        |        |         |         |   |
| 2449   | C   | C   | . ASN ASN ASN A A 323 323 . | 0.1700 | 0.1574 | 0.1461 | 0.0036  | -0.0111 |   |
| 0.0067 | 1   | .   |                             |        |        |        |         |         |   |
| 2450   | O   | O   | . ASN ASN ASN A A 323 323 . | 0.1738 | 0.1567 | 0.1296 | 0.0172  | -0.0162 | - |
| 0.0117 | 1   | .   |                             |        |        |        |         |         |   |
| 2451   | N   | N   | . PRO PRO PRO A A 324 324 . | 0.1900 | 0.1775 | 0.1604 | -0.0135 | -0.0117 |   |
| 0.0040 | 1   | .   |                             |        |        |        |         |         |   |

|        |     |     |                             |        |        |        |         |         |   |
|--------|-----|-----|-----------------------------|--------|--------|--------|---------|---------|---|
| 2452   | CA  | CA  | . PRO PRO PRO A A 324 324 . | 0.1997 | 0.1934 | 0.1575 | -0.0080 | 0.0044  |   |
| 0.0126 | 1   | .   |                             |        |        |        |         |         |   |
| 2453   | CB  | CB  | . PRO PRO PRO A A 324 324 . | 0.1910 | 0.2172 | 0.1734 | -0.0058 | 0.0063  | - |
| 0.0016 | 1   | .   |                             |        |        |        |         |         |   |
| 2454   | CG  | CG  | . PRO PRO PRO A A 324 324 . | 0.2364 | 0.2360 | 0.1592 | -0.0049 | -0.0075 |   |
| 0.0043 | 1   | .   |                             |        |        |        |         |         |   |
| 2455   | CD  | CD  | . PRO PRO PRO A A 324 324 . | 0.1403 | 0.2058 | 0.1762 | -0.0079 | -0.0121 |   |
| 0.0098 | 1   | .   |                             |        |        |        |         |         |   |
| 2456   | C   | C   | . PRO PRO PRO A A 324 324 . | 0.2469 | 0.1941 | 0.1810 | 0.0133  | -0.0065 |   |
| 0.0204 | 1   | .   |                             |        |        |        |         |         |   |
| 2457   | O   | O   | . PRO PRO PRO A A 324 324 . | 0.2570 | 0.1652 | 0.2038 | 0.0197  | -0.0291 |   |
| 0.0163 | 1   | .   |                             |        |        |        |         |         |   |
| 2458   | N   | N   | . LYS LYS LYS A A 325 325 . | 0.2422 | 0.1923 | 0.1905 | 0.0172  | 0.0026  |   |
| 0.0328 | 1   | .   |                             |        |        |        |         |         |   |
| 2459   | CA  | CA  | . LYS LYS LYS A A 325 325 . | 0.2329 | 0.1934 | 0.1937 | 0.0176  | -0.0011 |   |
| 0.0206 | 1   | .   |                             |        |        |        |         |         |   |
| 2460   | CB  | CB  | . LYS LYS LYS A A 325 325 . | 0.2613 | 0.1976 | 0.2118 | 0.0267  | 0.0098  |   |
| 0.0216 | 1   | .   |                             |        |        |        |         |         |   |
| 2461   | C   | C   | . LYS LYS LYS A A 325 325 . | 0.2286 | 0.1986 | 0.1900 | 0.0233  | -0.0102 |   |
| 0.0165 | 1   | .   |                             |        |        |        |         |         |   |
| 2462   | O   | O   | . LYS LYS LYS A A 325 325 . | 0.2494 | 0.1984 | 0.1761 | 0.0337  | -0.0409 |   |
| 0.0339 | 1   | .   |                             |        |        |        |         |         |   |
| 2463   | N   | N   | . ARG ARG ARG A A 326 326 . | 0.2012 | 0.1620 | 0.1661 | 0.0201  | 0.0039  |   |
| 0.0101 | 1   | .   |                             |        |        |        |         |         |   |
| 2464   | CA  | CA  | . ARG ARG ARG A A 326 326 . | 0.1752 | 0.1533 | 0.1532 | 0.0297  | -0.0050 | - |
| 0.0023 | 1   | .   |                             |        |        |        |         |         |   |
| 2465   | CB  | CB  | . ARG ARG ARG A A 326 326 . | 0.1806 | 0.1708 | 0.1392 | 0.0449  | 0.0292  | - |
| 0.0255 | 1   | .   |                             |        |        |        |         |         |   |
| 2466   | CG  | CG  | . ARG ARG ARG A A 326 326 . | 0.3069 | 0.1439 | 0.1812 | 0.0106  | 0.0369  | - |
| 0.0450 | 1   | .   |                             |        |        |        |         |         |   |
| 2467   | CD  | CD  | . ARG ARG ARG A A 326 326 . | 0.3539 | 0.3286 | 0.2162 | 0.0373  | 0.0500  |   |
| 0.0111 | 1   | .   |                             |        |        |        |         |         |   |
| 2468   | NE  | NE  | . ARG ARG ARG A A 326 326 . | 0.2316 | 0.3546 | 0.1984 | 0.0943  | 0.0152  | - |
| 0.0302 | 1   | .   |                             |        |        |        |         |         |   |
| 2469   | CZ  | CZ  | . ARG ARG ARG A A 326 326 . | 0.2650 | 0.2295 | 0.2017 | -0.0051 | 0.0014  |   |
| 0.0339 | 1   | .   |                             |        |        |        |         |         |   |
| 2470   | NH1 | NH1 | . ARG ARG ARG A A 326 326 . | 0.1515 | 0.2215 | 0.1745 | 0.0445  | 0.0052  | - |
| 0.0039 | 1   | .   |                             |        |        |        |         |         |   |
| 2471   | NH2 | NH2 | . ARG ARG ARG A A 326 326 . | 0.2496 | 0.1830 | 0.2215 | 0.0565  | 0.0695  |   |
| 0.0104 | 1   | .   |                             |        |        |        |         |         |   |
| 2472   | C   | C   | . ARG ARG ARG A A 326 326 . | 0.1560 | 0.1512 | 0.1416 | 0.0283  | -0.0083 | - |
| 0.0078 | 1   | .   |                             |        |        |        |         |         |   |
| 2473   | O   | O   | . ARG ARG ARG A A 326 326 . | 0.1882 | 0.1569 | 0.1472 | 0.0328  | -0.0068 |   |
| 0.0088 | 1   | .   |                             |        |        |        |         |         |   |
| 2474   | N   | N   | . ILE ILE ILE A A 327 327 . | 0.1774 | 0.1402 | 0.1038 | 0.0332  | -0.0081 |   |
| 0.0068 | 1   | .   |                             |        |        |        |         |         |   |
| 2475   | CA  | CA  | . ILE ILE ILE A A 327 327 . | 0.1894 | 0.1570 | 0.1297 | 0.0387  | -0.0143 |   |
| 0.0126 | 1   | .   |                             |        |        |        |         |         |   |
| 2476   | CB  | CB  | . ILE ILE ILE A A 327 327 . | 0.1765 | 0.1527 | 0.1271 | 0.0298  | -0.0109 |   |
| 0.0049 | 1   | .   |                             |        |        |        |         |         |   |
| 2477   | CG1 | CG1 | . ILE ILE ILE A A 327 327 . | 0.1774 | 0.1363 | 0.1341 | 0.0335  | -0.0399 |   |
| 0.0002 | 1   | .   |                             |        |        |        |         |         |   |
| 2478   | CD1 | CD1 | . ILE ILE ILE A A 327 327 . | 0.1256 | 0.0695 | 0.1617 | 0.0050  | -0.0274 | - |
| 0.0110 | 1   | .   |                             |        |        |        |         |         |   |
| 2479   | CG2 | CG2 | . ILE ILE ILE A A 327 327 . | 0.1452 | 0.1413 | 0.1251 | 0.0303  | 0.0018  |   |
| 0.0085 | 1   | .   |                             |        |        |        |         |         |   |
| 2480   | C   | C   | . ILE ILE ILE A A 327 327 . | 0.2281 | 0.1764 | 0.1517 | 0.0251  | -0.0187 |   |
| 0.0123 | 1   | .   |                             |        |        |        |         |         |   |
| 2481   | O   | O   | . ILE ILE ILE A A 327 327 . | 0.2474 | 0.1609 | 0.1650 | 0.0127  | -0.0420 | - |
| 0.0020 | 1   | .   |                             |        |        |        |         |         |   |

|        |     |     |                             |        |        |        |         |         |   |
|--------|-----|-----|-----------------------------|--------|--------|--------|---------|---------|---|
| 2482   | N   | N   | . GLU GLU GLU A A 328 328 . | 0.2300 | 0.1944 | 0.1661 | 0.0137  | -0.0084 |   |
| 0.0187 | 1   | .   |                             |        |        |        |         |         |   |
| 2483   | CA  | CA  | . GLU GLU GLU A A 328 328 . | 0.2336 | 0.2051 | 0.1970 | 0.0094  | -0.0078 |   |
| 0.0318 | 1   | .   |                             |        |        |        |         |         |   |
| 2484   | CB  | CB  | . GLU GLU GLU A A 328 328 . | 0.2502 | 0.1956 | 0.1992 | -0.0047 | -0.0058 |   |
| 0.0233 | 1   | .   |                             |        |        |        |         |         |   |
| 2485   | CG  | CG  | . GLU GLU GLU A A 328 328 . | 0.3115 | 0.2990 | 0.3077 | -0.0005 | 0.0037  |   |
| 0.0207 | 1   | .   |                             |        |        |        |         |         |   |
| 2486   | CD  | CD  | . GLU GLU GLU A A 328 328 . | 0.4940 | 0.4565 | 0.3800 | -0.0593 | 0.0106  |   |
| 0.0392 | 1   | .   |                             |        |        |        |         |         |   |
| 2487   | OE1 | OE1 | . GLU GLU GLU A A 328 328 . | 0.5290 | 0.4939 | 0.4468 | -0.1204 | -0.0168 |   |
| 0.0355 | 1   | .   |                             |        |        |        |         |         |   |
| 2488   | OE2 | OE2 | . GLU GLU GLU A A 328 328 . | 0.5835 | 0.4799 | 0.4407 | -0.0777 | -0.0217 |   |
| 0.0196 | 1   | .   |                             |        |        |        |         |         |   |
| 2489   | C   | C   | . GLU GLU GLU A A 328 328 . | 0.2378 | 0.1890 | 0.2003 | 0.0141  | -0.0083 |   |
| 0.0323 | 1   | .   |                             |        |        |        |         |         |   |
| 2490   | O   | O   | . GLU GLU GLU A A 328 328 . | 0.2551 | 0.2097 | 0.1878 | 0.0223  | 0.0008  |   |
| 0.0312 | 1   | .   |                             |        |        |        |         |         |   |
| 2491   | N   | N   | . ARG ARG ARG A A 329 329 . | 0.2259 | 0.1836 | 0.2094 | 0.0259  | -0.0018 |   |
| 0.0257 | 1   | .   |                             |        |        |        |         |         |   |
| 2492   | CA  | CA  | . ARG ARG ARG A A 329 329 . | 0.2195 | 0.2116 | 0.2125 | 0.0136  | -0.0229 |   |
| 0.0215 | 1   | .   |                             |        |        |        |         |         |   |
| 2493   | CB  | CB  | . ARG ARG ARG A A 329 329 . | 0.2217 | 0.2309 | 0.2489 | 0.0317  | -0.0276 |   |
| 0.0264 | 1   | .   |                             |        |        |        |         |         |   |
| 2494   | CG  | CG  | . ARG ARG ARG A A 329 329 . | 0.2619 | 0.2717 | 0.2782 | 0.0074  | 0.0113  |   |
| 0.0464 | 1   | .   |                             |        |        |        |         |         |   |
| 2495   | CD  | CD  | . ARG ARG ARG A A 329 329 . | 0.2857 | 0.3295 | 0.2964 | 0.0089  | 0.0049  |   |
| 0.0306 | 1   | .   |                             |        |        |        |         |         |   |
| 2496   | NE  | NE  | . ARG ARG ARG A A 329 329 . | 0.3094 | 0.3364 | 0.3039 | -0.0049 | 0.0190  |   |
| 0.0619 | 1   | .   |                             |        |        |        |         |         |   |
| 2497   | CZ  | CZ  | . ARG ARG ARG A A 329 329 . | 0.2925 | 0.2829 | 0.3039 | 0.0616  | -0.0330 |   |
| 0.0441 | 1   | .   |                             |        |        |        |         |         |   |
| 2498   | NH1 | NH1 | . ARG ARG ARG A A 329 329 . | 0.3799 | 0.2855 | 0.3211 | 0.0576  | -0.0256 | - |
| 0.0221 | 1   | .   |                             |        |        |        |         |         |   |
| 2499   | NH2 | NH2 | . ARG ARG ARG A A 329 329 . | 0.3094 | 0.2912 | 0.2897 | 0.0258  | 0.0041  |   |
| 0.0890 | 1   | .   |                             |        |        |        |         |         |   |
| 2500   | C   | C   | . ARG ARG ARG A A 329 329 . | 0.2192 | 0.2171 | 0.2128 | 0.0190  | -0.0271 |   |
| 0.0150 | 1   | .   |                             |        |        |        |         |         |   |
| 2501   | O   | O   | . ARG ARG ARG A A 329 329 . | 0.2350 | 0.2091 | 0.2243 | 0.0140  | -0.0241 | - |
| 0.0130 | 1   | .   |                             |        |        |        |         |         |   |
| 2502   | N   | N   | . ALA ALA ALA A A 330 330 . | 0.1756 | 0.1855 | 0.1999 | 0.0319  | -0.0267 |   |
| 0.0149 | 1   | .   |                             |        |        |        |         |         |   |
| 2503   | CA  | CA  | . ALA ALA ALA A A 330 330 . | 0.1914 | 0.1900 | 0.1832 | 0.0338  | -0.0255 |   |
| 0.0027 | 1   | .   |                             |        |        |        |         |         |   |
| 2504   | CB  | CB  | . ALA ALA ALA A A 330 330 . | 0.1885 | 0.1673 | 0.1458 | 0.0394  | -0.0214 |   |
| 0.0189 | 1   | .   |                             |        |        |        |         |         |   |
| 2505   | C   | C   | . ALA ALA ALA A A 330 330 . | 0.1937 | 0.1974 | 0.1743 | 0.0275  | -0.0312 |   |
| 0.0093 | 1   | .   |                             |        |        |        |         |         |   |
| 2506   | O   | O   | . ALA ALA ALA A A 330 330 . | 0.2038 | 0.1934 | 0.2053 | 0.0206  | -0.0280 |   |
| 0.0062 | 1   | .   |                             |        |        |        |         |         |   |
| 2507   | N   | N   | . VAL VAL VAL A A 331 331 . | 0.2019 | 0.1866 | 0.1715 | 0.0304  | -0.0249 |   |
| 0.0102 | 1   | .   |                             |        |        |        |         |         |   |
| 2508   | CA  | CA  | . VAL VAL VAL A A 331 331 . | 0.2541 | 0.2341 | 0.2057 | 0.0195  | -0.0126 |   |
| 0.0005 | 1   | .   |                             |        |        |        |         |         |   |
| 2509   | CB  | CB  | . VAL VAL VAL A A 331 331 . | 0.2543 | 0.2140 | 0.2051 | 0.0049  | 0.0024  |   |
| 0.0072 | 1   | .   |                             |        |        |        |         |         |   |
| 2510   | CG1 | CG1 | . VAL VAL VAL A A 331 331 . | 0.3503 | 0.2718 | 0.2333 | 0.0031  | 0.0277  | - |
| 0.0135 | 1   | .   |                             |        |        |        |         |         |   |
| 2511   | CG2 | CG2 | . VAL VAL VAL A A 331 331 . | 0.2708 | 0.2554 | 0.2384 | -0.0006 | 0.0162  |   |
| 0.0015 | 1   | .   |                             |        |        |        |         |         |   |

|        |     |     |                             |        |        |        |         |         |   |
|--------|-----|-----|-----------------------------|--------|--------|--------|---------|---------|---|
| 2512   | C   | C   | . VAL VAL VAL A A 331 331 . | 0.2703 | 0.2305 | 0.2055 | 0.0136  | -0.0201 |   |
| 0.0165 | 1   | .   |                             |        |        |        |         |         |   |
| 2513   | O   | O   | . VAL VAL VAL A A 331 331 . | 0.2896 | 0.2482 | 0.1683 | 0.0322  | -0.0268 |   |
| 0.0305 | 1   | .   |                             |        |        |        |         |         |   |
| 2514   | N   | N   | . GLU GLU GLU A A 332 332 . | 0.2676 | 0.2526 | 0.2219 | 0.0239  | -0.0134 |   |
| 0.0108 | 1   | .   |                             |        |        |        |         |         |   |
| 2515   | CA  | CA  | . GLU GLU GLU A A 332 332 . | 0.3102 | 0.2779 | 0.2517 | 0.0159  | -0.0355 |   |
| 0.0143 | 1   | .   |                             |        |        |        |         |         |   |
| 2516   | CB  | CB  | . GLU GLU GLU A A 332 332 . | 0.3063 | 0.2894 | 0.2739 | 0.0284  | -0.0427 |   |
| 0.0298 | 1   | .   |                             |        |        |        |         |         |   |
| 2517   | CG  | CG  | . GLU GLU GLU A A 332 332 . | 0.3972 | 0.3763 | 0.3573 | 0.0235  | -0.0471 |   |
| 0.0509 | 1   | .   |                             |        |        |        |         |         |   |
| 2518   | CD  | CD  | . GLU GLU GLU A A 332 332 . | 0.5014 | 0.5163 | 0.4282 | 0.0036  | -0.0242 |   |
| 0.0422 | 1   | .   |                             |        |        |        |         |         |   |
| 2519   | OE1 | OE1 | . GLU GLU GLU A A 332 332 . | 0.5282 | 0.5657 | 0.5175 | -0.0035 | -0.0519 |   |
| 0.0515 | 1   | .   |                             |        |        |        |         |         |   |
| 2520   | OE2 | OE2 | . GLU GLU GLU A A 332 332 . | 0.5060 | 0.5577 | 0.4750 | -0.0027 | -0.0353 |   |
| 0.0787 | 1   | .   |                             |        |        |        |         |         |   |
| 2521   | C   | C   | . GLU GLU GLU A A 332 332 . | 0.3045 | 0.2684 | 0.2457 | 0.0163  | -0.0315 |   |
| 0.0107 | 1   | .   |                             |        |        |        |         |         |   |
| 2522   | O   | O   | . GLU GLU GLU A A 332 332 . | 0.3589 | 0.2764 | 0.2490 | 0.0201  | -0.0556 |   |
| 0.0351 | 1   | .   |                             |        |        |        |         |         |   |
| 2523   | N   | N   | . GLU GLU GLU A A 333 333 . | 0.2929 | 0.2464 | 0.2466 | 0.0122  | -0.0323 |   |
| 0.0071 | 1   | .   |                             |        |        |        |         |         |   |
| 2524   | CA  | CA  | . GLU GLU GLU A A 333 333 . | 0.2575 | 0.2306 | 0.2409 | 0.0227  | -0.0317 | - |
| 0.0041 | 1   | .   |                             |        |        |        |         |         |   |
| 2525   | CB  | CB  | . GLU GLU GLU A A 333 333 . | 0.2664 | 0.2461 | 0.2748 | 0.0222  | -0.0277 | - |
| 0.0013 | 1   | .   |                             |        |        |        |         |         |   |
| 2526   | CG  | CG  | . GLU GLU GLU A A 333 333 . | 0.3445 | 0.2511 | 0.3285 | 0.0197  | -0.0190 | - |
| 0.0216 | 1   | .   |                             |        |        |        |         |         |   |
| 2527   | CD  | CD  | . GLU GLU GLU A A 333 333 . | 0.3980 | 0.3714 | 0.4253 | 0.0104  | 0.0170  | - |
| 0.0138 | 1   | .   |                             |        |        |        |         |         |   |
| 2528   | OE1 | OE1 | . GLU GLU GLU A A 333 333 . | 0.4735 | 0.3765 | 0.4974 | -0.0043 | -0.0083 |   |
| 0.0019 | 1   | .   |                             |        |        |        |         |         |   |
| 2529   | OE2 | OE2 | . GLU GLU GLU A A 333 333 . | 0.4166 | 0.3677 | 0.4943 | -0.0012 | 0.0046  | - |
| 0.0080 | 1   | .   |                             |        |        |        |         |         |   |
| 2530   | C   | C   | . GLU GLU GLU A A 333 333 . | 0.2417 | 0.2263 | 0.2262 | 0.0129  | -0.0246 | - |
| 0.0030 | 1   | .   |                             |        |        |        |         |         |   |
| 2531   | O   | O   | . GLU GLU GLU A A 333 333 . | 0.2250 | 0.2072 | 0.2336 | 0.0352  | -0.0494 |   |
| 0.0007 | 1   | .   |                             |        |        |        |         |         |   |
| 2532   | N   | N   | . LYS LYS LYS A A 334 334 . | 0.2182 | 0.2134 | 0.1792 | 0.0165  | -0.0427 | - |
| 0.0200 | 1   | .   |                             |        |        |        |         |         |   |
| 2533   | CA  | CA  | . LYS LYS LYS A A 334 334 . | 0.2203 | 0.2184 | 0.1714 | 0.0082  | -0.0208 | - |
| 0.0123 | 1   | .   |                             |        |        |        |         |         |   |
| 2534   | CB  | CB  | . LYS LYS LYS A A 334 334 . | 0.2143 | 0.2307 | 0.1693 | 0.0073  | -0.0255 | - |
| 0.0060 | 1   | .   |                             |        |        |        |         |         |   |
| 2535   | CG  | CG  | . LYS LYS LYS A A 334 334 . | 0.2924 | 0.2315 | 0.1683 | -0.0045 | 0.0076  | - |
| 0.0091 | 1   | .   |                             |        |        |        |         |         |   |
| 2536   | CD  | CD  | . LYS LYS LYS A A 334 334 . | 0.4138 | 0.3340 | 0.2887 | -0.0065 | -0.0706 | - |
| 0.0481 | 1   | .   |                             |        |        |        |         |         |   |
| 2537   | C   | C   | . LYS LYS LYS A A 334 334 . | 0.2154 | 0.1962 | 0.1752 | 0.0184  | -0.0300 | - |
| 0.0136 | 1   | .   |                             |        |        |        |         |         |   |
| 2538   | O   | O   | . LYS LYS LYS A A 334 334 . | 0.2449 | 0.2011 | 0.1673 | 0.0134  | -0.0090 | - |
| 0.0228 | 1   | .   |                             |        |        |        |         |         |   |
| 2539   | N   | N   | . ALA ALA ALA A A 335 335 . | 0.2045 | 0.1601 | 0.1491 | 0.0354  | -0.0227 | - |
| 0.0165 | 1   | .   |                             |        |        |        |         |         |   |
| 2540   | CA  | CA  | . ALA ALA ALA A A 335 335 . | 0.1989 | 0.1682 | 0.1715 | 0.0276  | -0.0194 | - |
| 0.0142 | 1   | .   |                             |        |        |        |         |         |   |
| 2541   | CB  | CB  | . ALA ALA ALA A A 335 335 . | 0.1957 | 0.1664 | 0.1453 | 0.0350  | -0.0234 | - |
| 0.0319 | 1   | .   |                             |        |        |        |         |         |   |

|        |     |     |                             |        |        |        |         |         |   |
|--------|-----|-----|-----------------------------|--------|--------|--------|---------|---------|---|
| 2542   | C   | C   | . ALA ALA ALA A A 335 335 . | 0.1863 | 0.1787 | 0.1632 | 0.0282  | -0.0185 | - |
| 0.0067 | 1   | .   |                             |        |        |        |         |         |   |
| 2543   | O   | O   | . ALA ALA ALA A A 335 335 . | 0.1656 | 0.1658 | 0.1476 | 0.0145  | -0.0401 | - |
| 0.0084 | 1   | .   |                             |        |        |        |         |         |   |
| 2544   | N   | N   | . CYS CYS CYS A A 336 336 . | 0.1870 | 0.1695 | 0.1679 | 0.0351  | -0.0182 | - |
| 0.0056 | 1   | .   |                             |        |        |        |         |         |   |
| 2545   | CA  | CA  | . CYS CYS CYS A A 336 336 . | 0.1730 | 0.1694 | 0.1433 | 0.0395  | -0.0218 | - |
| 0.0029 | 1   | .   |                             |        |        |        |         |         |   |
| 2546   | CB  | CB  | . CYS CYS CYS A A 336 336 . | 0.1925 | 0.1580 | 0.1448 | 0.0305  | -0.0266 | - |
| 0.0154 | 1   | .   |                             |        |        |        |         |         |   |
| 2547   | SG  | SG  | . CYS CYS CYS A A 336 336 . | 0.1651 | 0.1640 | 0.1490 | 0.0231  | -0.0225 | - |
| 0.0091 | 1   | .   |                             |        |        |        |         |         |   |
| 2548   | C   | C   | . CYS CYS CYS A A 336 336 . | 0.1789 | 0.1707 | 0.1566 | 0.0308  | -0.0119 | - |
| 0.0016 | 1   | .   |                             |        |        |        |         |         |   |
| 2549   | O   | O   | . CYS CYS CYS A A 336 336 . | 0.1835 | 0.1755 | 0.1559 | 0.0357  | -0.0128 | - |
| 0.0074 | 1   | .   |                             |        |        |        |         |         |   |
| 2550   | N   | N   | . ASN ASN ASN A A 337 337 . | 0.1463 | 0.1442 | 0.1197 | 0.0286  | -0.0377 | - |
| 0.0208 | 1   | .   |                             |        |        |        |         |         |   |
| 2551   | CA  | CA  | . ASN ASN ASN A A 337 337 . | 0.1439 | 0.1498 | 0.1420 | 0.0087  | -0.0314 | - |
| 0.0159 | 1   | .   |                             |        |        |        |         |         |   |
| 2552   | CB  | CB  | . ASN ASN ASN A A 337 337 . | 0.1668 | 0.1629 | 0.1354 | -0.0044 | -0.0378 | - |
| 0.0122 | 1   | .   |                             |        |        |        |         |         |   |
| 2553   | CG  | CG  | . ASN ASN ASN A A 337 337 . | 0.1630 | 0.1897 | 0.1623 | -0.0043 | -0.0293 | - |
| 0.0084 | 1   | .   |                             |        |        |        |         |         |   |
| 2554   | OD1 | OD1 | . ASN ASN ASN A A 337 337 . | 0.2214 | 0.2281 | 0.2565 | 0.0107  | -0.0314 | - |
| 0.0308 | 1   | .   |                             |        |        |        |         |         |   |
| 2555   | ND2 | ND2 | . ASN ASN ASN A A 337 337 . | 0.1216 | 0.0943 | 0.1215 | -0.0076 | -0.0578 | - |
| 0.0093 | 1   | .   |                             |        |        |        |         |         |   |
| 2556   | C   | C   | . ASN ASN ASN A A 337 337 . | 0.1519 | 0.1475 | 0.1345 | 0.0099  | -0.0198 | - |
| 0.0206 | 1   | .   |                             |        |        |        |         |         |   |
| 2557   | O   | O   | . ASN ASN ASN A A 337 337 . | 0.1492 | 0.1405 | 0.1623 | 0.0002  | -0.0185 | - |
| 0.0121 | 1   | .   |                             |        |        |        |         |         |   |
| 2558   | N   | N   | . CYS CYS CYS A A 338 338 . | 0.1346 | 0.1090 | 0.1224 | -0.0019 | -0.0142 | - |
| 0.0084 | 1   | .   |                             |        |        |        |         |         |   |
| 2559   | CA  | CA  | . CYS CYS CYS A A 338 338 . | 0.1248 | 0.0800 | 0.0927 | 0.0124  | -0.0219 | - |
| 0.0119 | 1   | .   |                             |        |        |        |         |         |   |
| 2560   | CB  | CB  | . CYS CYS CYS A A 338 338 . | 0.1481 | 0.1208 | 0.1209 | 0.0010  | -0.0414 | - |
| 0.0050 | 1   | .   |                             |        |        |        |         |         |   |
| 2561   | SG  | SG  | . CYS CYS CYS A A 338 338 . | 0.1423 | 0.1266 | 0.1485 | 0.0372  | -0.0265 | - |
| 0.0155 | 1   | .   |                             |        |        |        |         |         |   |
| 2562   | C   | C   | . CYS CYS CYS A A 338 338 . | 0.1125 | 0.0968 | 0.1000 | 0.0068  | -0.0061 | - |
| 0.0122 | 1   | .   |                             |        |        |        |         |         |   |
| 2563   | O   | O   | . CYS CYS CYS A A 338 338 . | 0.1474 | 0.1057 | 0.1611 | 0.0247  | -0.0271 | - |
| 0.0121 | 1   | .   |                             |        |        |        |         |         |   |
| 2564   | N   | N   | . LEU LEU LEU A A 339 339 . | 0.0830 | 0.0729 | 0.0665 | 0.0148  | -0.0101 | - |
| 0.0081 | 1   | .   |                             |        |        |        |         |         |   |
| 2565   | CA  | CA  | . LEU LEU LEU A A 339 339 . | 0.1080 | 0.0834 | 0.0722 | 0.0065  | -0.0113 | - |
| 0.0055 | 1   | .   |                             |        |        |        |         |         |   |
| 2566   | CB  | CB  | . LEU LEU LEU A A 339 339 . | 0.1029 | 0.0825 | 0.0594 | -0.0126 | -0.0146 | - |
| 0.0107 | 1   | .   |                             |        |        |        |         |         |   |
| 2567   | CG  | CG  | . LEU LEU LEU A A 339 339 . | 0.1012 | 0.0726 | 0.0553 | -0.0026 | -0.0004 | - |
| 0.0025 | 1   | .   |                             |        |        |        |         |         |   |
| 2568   | CD1 | CD1 | . LEU LEU LEU A A 339 339 . | 0.1446 | 0.0878 | 0.1303 | 0.0522  | 0.0118  | - |
| 0.0201 | 1   | .   |                             |        |        |        |         |         |   |
| 2569   | CD2 | CD2 | . LEU LEU LEU A A 339 339 . | 0.1248 | 0.1302 | 0.1262 | -0.0076 | 0.0087  | - |
| 0.0187 | 1   | .   |                             |        |        |        |         |         |   |
| 2570   | C   | C   | . LEU LEU LEU A A 339 339 . | 0.1034 | 0.1011 | 0.0710 | 0.0094  | 0.0006  | - |
| 0.0029 | 1   | .   |                             |        |        |        |         |         |   |
| 2571   | O   | O   | . LEU LEU LEU A A 339 339 . | 0.1220 | 0.1011 | 0.0596 | 0.0109  | 0.0064  | - |
| 0.0043 | 1   | .   |                             |        |        |        |         |         |   |

|        |     |     |                             |        |        |        |         |         |   |
|--------|-----|-----|-----------------------------|--------|--------|--------|---------|---------|---|
| 2572   | N   | N   | . LEU LEU LEU A A 340 340 . | 0.1116 | 0.1014 | 0.0717 | 0.0044  | 0.0036  |   |
| 0.0105 | 1   | .   |                             |        |        |        |         |         |   |
| 2573   | CA  | CA  | . LEU LEU LEU A A 340 340 . | 0.0920 | 0.1030 | 0.0711 | -0.0024 | 0.0053  |   |
| 0.0140 | 1   | .   |                             |        |        |        |         |         |   |
| 2574   | CB  | CB  | . LEU LEU LEU A A 340 340 . | 0.0870 | 0.0763 | 0.0915 | 0.0056  | 0.0130  |   |
| 0.0175 | 1   | .   |                             |        |        |        |         |         |   |
| 2575   | CG  | CG  | . LEU LEU LEU A A 340 340 . | 0.1096 | 0.0732 | 0.0716 | 0.0014  | 0.0166  |   |
| 0.0094 | 1   | .   |                             |        |        |        |         |         |   |
| 2576   | CD1 | CD1 | . LEU LEU LEU A A 340 340 . | 0.0731 | 0.0614 | 0.0970 | -0.0119 | 0.0026  | - |
| 0.0077 | 1   | .   |                             |        |        |        |         |         |   |
| 2577   | CD2 | CD2 | . LEU LEU LEU A A 340 340 . | 0.1140 | 0.0920 | 0.0719 | -0.0131 | 0.0104  | - |
| 0.0117 | 1   | .   |                             |        |        |        |         |         |   |
| 2578   | C   | C   | . LEU LEU LEU A A 340 340 . | 0.1028 | 0.1062 | 0.0859 | 0.0099  | 0.0002  | - |
| 0.0005 | 1   | .   |                             |        |        |        |         |         |   |
| 2579   | O   | O   | . LEU LEU LEU A A 340 340 . | 0.1131 | 0.1044 | 0.0825 | -0.0123 | -0.0135 |   |
| 0.0116 | 1   | .   |                             |        |        |        |         |         |   |
| 2580   | N   | N   | . LEU LEU LEU A A 341 341 . | 0.0914 | 0.1028 | 0.0928 | 0.0064  | -0.0009 | - |
| 0.0002 | 1   | .   |                             |        |        |        |         |         |   |
| 2581   | CA  | CA  | . LEU LEU LEU A A 341 341 . | 0.0996 | 0.1177 | 0.1021 | 0.0088  | 0.0054  |   |
| 0.0062 | 1   | .   |                             |        |        |        |         |         |   |
| 2582   | CB  | CB  | . LEU LEU LEU A A 341 341 . | 0.1068 | 0.0927 | 0.0983 | 0.0095  | 0.0140  |   |
| 0.0040 | 1   | .   |                             |        |        |        |         |         |   |
| 2583   | CG  | CG  | . LEU LEU LEU A A 341 341 . | 0.0937 | 0.1221 | 0.1252 | -0.0001 | -0.0071 |   |
| 0.0059 | 1   | .   |                             |        |        |        |         |         |   |
| 2584   | CD1 | CD1 | . LEU LEU LEU A A 341 341 . | 0.1925 | 0.1249 | 0.1464 | 0.0642  | 0.0206  | - |
| 0.0028 | 1   | .   |                             |        |        |        |         |         |   |
| 2585   | CD2 | CD2 | . LEU LEU LEU A A 341 341 . | 0.1293 | 0.1844 | 0.1926 | 0.0203  | 0.0302  | - |
| 0.0100 | 1   | .   |                             |        |        |        |         |         |   |
| 2586   | C   | C   | . LEU LEU LEU A A 341 341 . | 0.1060 | 0.1216 | 0.1046 | 0.0117  | 0.0030  |   |
| 0.0001 | 1   | .   |                             |        |        |        |         |         |   |
| 2587   | O   | O   | . LEU LEU LEU A A 341 341 . | 0.1173 | 0.1168 | 0.1018 | 0.0112  | -0.0138 |   |
| 0.0098 | 1   | .   |                             |        |        |        |         |         |   |
| 2588   | N   | N   | . LYS LYS LYS A A 342 342 . | 0.1226 | 0.1320 | 0.1073 | 0.0301  | -0.0002 | - |
| 0.0098 | 1   | .   |                             |        |        |        |         |         |   |
| 2589   | CA  | CA  | . LYS LYS LYS A A 342 342 . | 0.1081 | 0.1392 | 0.0892 | 0.0074  | -0.0027 |   |
| 0.0075 | 1   | .   |                             |        |        |        |         |         |   |
| 2590   | CB  | CB  | . LYS LYS LYS A A 342 342 . | 0.1171 | 0.1469 | 0.1005 | 0.0163  | -0.0066 |   |
| 0.0097 | 1   | .   |                             |        |        |        |         |         |   |
| 2591   | CG  | CG  | . LYS LYS LYS A A 342 342 . | 0.1033 | 0.1096 | 0.1034 | 0.0256  | -0.0239 |   |
| 0.0136 | 1   | .   |                             |        |        |        |         |         |   |
| 2592   | CD  | CD  | . LYS LYS LYS A A 342 342 . | 0.0898 | 0.0945 | 0.0859 | -0.0038 | -0.0352 |   |
| 0.0212 | 1   | .   |                             |        |        |        |         |         |   |
| 2593   | CE  | CE  | . LYS LYS LYS A A 342 342 . | 0.1348 | 0.1555 | 0.1090 | -0.0210 | -0.0312 |   |
| 0.0085 | 1   | .   |                             |        |        |        |         |         |   |
| 2594   | NZ  | NZ  | . LYS LYS LYS A A 342 342 . | 0.1463 | 0.1749 | 0.1606 | -0.0262 | 0.0121  |   |
| 0.0206 | 1   | .   |                             |        |        |        |         |         |   |
| 2595   | C   | C   | . LYS LYS LYS A A 342 342 . | 0.1402 | 0.1423 | 0.0929 | 0.0246  | -0.0117 | - |
| 0.0119 | 1   | .   |                             |        |        |        |         |         |   |
| 2596   | O   | O   | . LYS LYS LYS A A 342 342 . | 0.1462 | 0.1444 | 0.0802 | 0.0338  | -0.0335 |   |
| 0.0063 | 1   | .   |                             |        |        |        |         |         |   |
| 2597   | N   | N   | . VAL VAL VAL A A 343 343 . | 0.0911 | 0.1282 | 0.0909 | -0.0050 | 0.0009  |   |
| 0.0012 | 1   | .   |                             |        |        |        |         |         |   |
| 2598   | CA  | CA  | . VAL VAL VAL A A 343 343 . | 0.1219 | 0.1169 | 0.0982 | 0.0008  | 0.0074  |   |
| 0.0118 | 1   | .   |                             |        |        |        |         |         |   |
| 2599   | CB  | CB  | . VAL VAL VAL A A 343 343 . | 0.1307 | 0.1443 | 0.1092 | 0.0141  | 0.0149  |   |
| 0.0141 | 1   | .   |                             |        |        |        |         |         |   |
| 2600   | CG1 | CG1 | . VAL VAL VAL A A 343 343 . | 0.1625 | 0.1916 | 0.0754 | 0.0427  | 0.0206  |   |
| 0.0136 | 1   | .   |                             |        |        |        |         |         |   |
| 2601   | CG2 | CG2 | . VAL VAL VAL A A 343 343 . | 0.1401 | 0.1798 | 0.1233 | -0.0094 | 0.0055  |   |
| 0.0282 | 1   | .   |                             |        |        |        |         |         |   |

|        |     |     |                             |        |        |        |         |         |   |
|--------|-----|-----|-----------------------------|--------|--------|--------|---------|---------|---|
| 2602   | C   | C   | . VAL VAL VAL A A 343 343 . | 0.1213 | 0.1110 | 0.0868 | -0.0032 | 0.0123  |   |
| 0.0116 | 1   | .   |                             |        |        |        |         |         |   |
| 2603   | O   | O   | . VAL VAL VAL A A 343 343 . | 0.1607 | 0.0965 | 0.0808 | 0.0066  | 0.0105  |   |
| 0.0135 | 1   | .   |                             |        |        |        |         |         |   |
| 2604   | N   | N   | . ASN ASN ASN A A 344 344 . | 0.0903 | 0.0907 | 0.1089 | -0.0048 | 0.0061  |   |
| 0.0226 | 1   | .   |                             |        |        |        |         |         |   |
| 2605   | CA  | CA  | . ASN ASN ASN A A 344 344 . | 0.0903 | 0.1063 | 0.0903 | 0.0028  | 0.0024  |   |
| 0.0164 | 1   | .   |                             |        |        |        |         |         |   |
| 2606   | CB  | CB  | . ASN ASN ASN A A 344 344 . | 0.0801 | 0.1006 | 0.0710 | 0.0127  | 0.0036  | - |
| 0.0006 | 1   | .   |                             |        |        |        |         |         |   |
| 2607   | CG  | CG  | . ASN ASN ASN A A 344 344 . | 0.0893 | 0.0995 | 0.0944 | 0.0065  | -0.0078 | - |
| 0.0215 | 1   | .   |                             |        |        |        |         |         |   |
| 2608   | OD1 | OD1 | . ASN ASN ASN A A 344 344 . | 0.1048 | 0.0737 | 0.1298 | -0.0120 | -0.0074 | - |
| 0.0052 | 1   | .   |                             |        |        |        |         |         |   |
| 2609   | ND2 | ND2 | . ASN ASN ASN A A 344 344 . | 0.1040 | 0.1269 | 0.0960 | 0.0306  | 0.0109  |   |
| 0.0109 | 1   | .   |                             |        |        |        |         |         |   |
| 2610   | C   | C   | . ASN ASN ASN A A 344 344 . | 0.1094 | 0.1094 | 0.1034 | 0.0071  | -0.0085 | - |
| 0.0060 | 1   | .   |                             |        |        |        |         |         |   |
| 2611   | O   | O   | . ASN ASN ASN A A 344 344 . | 0.1170 | 0.0957 | 0.1154 | 0.0128  | 0.0095  | - |
| 0.0050 | 1   | .   |                             |        |        |        |         |         |   |
| 2612   | N   | N   | . GLN GLN GLN A A 345 345 . | 0.1054 | 0.0825 | 0.0858 | 0.0004  | -0.0006 | - |
| 0.0023 | 1   | .   |                             |        |        |        |         |         |   |
| 2613   | CA  | CA  | . GLN GLN GLN A A 345 345 . | 0.1120 | 0.0938 | 0.0948 | 0.0001  | -0.0066 | - |
| 0.0010 | 1   | .   |                             |        |        |        |         |         |   |
| 2614   | CB  | CB  | . GLN GLN GLN A A 345 345 . | 0.0957 | 0.0920 | 0.1072 | -0.0177 | 0.0036  |   |
| 0.0054 | 1   | .   |                             |        |        |        |         |         |   |
| 2615   | CG  | CG  | . GLN GLN GLN A A 345 345 . | 0.1031 | 0.0947 | 0.0974 | -0.0166 | -0.0015 |   |
| 0.0027 | 1   | .   |                             |        |        |        |         |         |   |
| 2616   | CD  | CD  | . GLN GLN GLN A A 345 345 . | 0.0945 | 0.0993 | 0.0868 | -0.0163 | 0.0034  |   |
| 0.0077 | 1   | .   |                             |        |        |        |         |         |   |
| 2617   | OE1 | OE1 | . GLN GLN GLN A A 345 345 . | 0.1134 | 0.0913 | 0.1336 | 0.0145  | -0.0172 |   |
| 0.0254 | 1   | .   |                             |        |        |        |         |         |   |
| 2618   | NE2 | NE2 | . GLN GLN GLN A A 345 345 . | 0.0615 | 0.1072 | 0.1410 | 0.0013  | -0.0094 |   |
| 0.0053 | 1   | .   |                             |        |        |        |         |         |   |
| 2619   | C   | C   | . GLN GLN GLN A A 345 345 . | 0.1029 | 0.0880 | 0.0961 | -0.0057 | 0.0088  | - |
| 0.0032 | 1   | .   |                             |        |        |        |         |         |   |
| 2620   | O   | O   | . GLN GLN GLN A A 345 345 . | 0.1193 | 0.1171 | 0.0930 | 0.0110  | 0.0070  |   |
| 0.0114 | 1   | .   |                             |        |        |        |         |         |   |
| 2621   | N   | N   | . ILE ILE ILE A A 346 346 . | 0.0922 | 0.0844 | 0.0892 | -0.0114 | 0.0005  | - |
| 0.0127 | 1   | .   |                             |        |        |        |         |         |   |
| 2622   | CA  | CA  | . ILE ILE ILE A A 346 346 . | 0.1102 | 0.1015 | 0.1071 | 0.0156  | 0.0023  |   |
| 0.0051 | 1   | .   |                             |        |        |        |         |         |   |
| 2623   | CB  | CB  | . ILE ILE ILE A A 346 346 . | 0.1214 | 0.1147 | 0.0924 | 0.0091  | -0.0035 |   |
| 0.0120 | 1   | .   |                             |        |        |        |         |         |   |
| 2624   | CG1 | CG1 | . ILE ILE ILE A A 346 346 . | 0.1178 | 0.0980 | 0.1225 | 0.0353  | -0.0094 |   |
| 0.0244 | 1   | .   |                             |        |        |        |         |         |   |
| 2625   | CD1 | CD1 | . ILE ILE ILE A A 346 346 . | 0.1057 | 0.1317 | 0.1142 | 0.0143  | -0.0211 |   |
| 0.0269 | 1   | .   |                             |        |        |        |         |         |   |
| 2626   | CG2 | CG2 | . ILE ILE ILE A A 346 346 . | 0.1178 | 0.1290 | 0.1057 | 0.0132  | 0.0198  |   |
| 0.0402 | 1   | .   |                             |        |        |        |         |         |   |
| 2627   | C   | C   | . ILE ILE ILE A A 346 346 . | 0.1078 | 0.1077 | 0.1152 | 0.0050  | -0.0070 |   |
| 0.0084 | 1   | .   |                             |        |        |        |         |         |   |
| 2628   | O   | O   | . ILE ILE ILE A A 346 346 . | 0.1152 | 0.1328 | 0.1172 | -0.0023 | -0.0231 | - |
| 0.0202 | 1   | .   |                             |        |        |        |         |         |   |
| 2629   | N   | N   | . GLY GLY GLY A A 347 347 . | 0.1110 | 0.0960 | 0.1034 | 0.0058  | -0.0176 |   |
| 0.0105 | 1   | .   |                             |        |        |        |         |         |   |
| 2630   | CA  | CA  | . GLY GLY GLY A A 347 347 . | 0.1129 | 0.1169 | 0.1203 | 0.0014  | -0.0061 |   |
| 0.0078 | 1   | .   |                             |        |        |        |         |         |   |
| 2631   | C   | C   | . GLY GLY GLY A A 347 347 . | 0.1120 | 0.1154 | 0.1103 | 0.0016  | -0.0038 |   |
| 0.0040 | 1   | .   |                             |        |        |        |         |         |   |



|        |     |     |                             |        |        |        |         |         |   |
|--------|-----|-----|-----------------------------|--------|--------|--------|---------|---------|---|
| 2632   | O   | O   | . GLY GLY GLY A A 347 347 . | 0.1094 | 0.0922 | 0.1250 | -0.0028 | -0.0066 |   |
| 0.0009 | 1   | .   |                             |        |        |        |         |         |   |
| 2633   | N   | N   | . SER SER SER A A 348 348 . | 0.1104 | 0.1009 | 0.1170 | 0.0099  | -0.0006 | - |
| 0.0139 | 1   | .   |                             |        |        |        |         |         |   |
| 2634   | CA  | CA  | . SER SER SER A A 348 348 . | 0.1268 | 0.0964 | 0.1117 | -0.0114 | 0.0041  | - |
| 0.0184 | 1   | .   |                             |        |        |        |         |         |   |
| 2635   | CB  | CB  | . SER SER SER A A 348 348 . | 0.1448 | 0.1144 | 0.1131 | -0.0126 | -0.0055 |   |
| 0.0084 | 1   | .   |                             |        |        |        |         |         |   |
| 2636   | OG  | OG  | . SER SER SER A A 348 348 . | 0.1693 | 0.1563 | 0.0781 | -0.0179 | -0.0054 |   |
| 0.0039 | 1   | .   |                             |        |        |        |         |         |   |
| 2637   | C   | C   | . SER SER SER A A 348 348 . | 0.0896 | 0.1066 | 0.1004 | 0.0033  | 0.0111  | - |
| 0.0132 | 1   | .   |                             |        |        |        |         |         |   |
| 2638   | O   | O   | . SER SER SER A A 348 348 . | 0.0994 | 0.1030 | 0.1133 | -0.0158 | 0.0018  | - |
| 0.0033 | 1   | .   |                             |        |        |        |         |         |   |
| 2639   | N   | N   | . VAL VAL VAL A A 349 349 . | 0.1119 | 0.0976 | 0.1064 | 0.0017  | 0.0030  | - |
| 0.0116 | 1   | .   |                             |        |        |        |         |         |   |
| 2640   | CA  | CA  | . VAL VAL VAL A A 349 349 . | 0.1050 | 0.1013 | 0.0869 | 0.0155  | 0.0209  |   |
| 0.0065 | 1   | .   |                             |        |        |        |         |         |   |
| 2641   | CB  | CB  | . VAL VAL VAL A A 349 349 . | 0.1055 | 0.0935 | 0.0792 | 0.0204  | 0.0070  | - |
| 0.0039 | 1   | .   |                             |        |        |        |         |         |   |
| 2642   | CG1 | CG1 | . VAL VAL VAL A A 349 349 . | 0.0880 | 0.1012 | 0.1463 | 0.0577  | 0.0137  | - |
| 0.0095 | 1   | .   |                             |        |        |        |         |         |   |
| 2643   | CG2 | CG2 | . VAL VAL VAL A A 349 349 . | 0.1657 | 0.1056 | 0.1311 | -0.0094 | 0.0137  |   |
| 0.0040 | 1   | .   |                             |        |        |        |         |         |   |
| 2644   | C   | C   | . VAL VAL VAL A A 349 349 . | 0.1111 | 0.0919 | 0.1020 | 0.0039  | -0.0043 |   |
| 0.0000 | 1   | .   |                             |        |        |        |         |         |   |
| 2645   | O   | O   | . VAL VAL VAL A A 349 349 . | 0.1185 | 0.1170 | 0.0791 | 0.0008  | 0.0151  |   |
| 0.0101 | 1   | .   |                             |        |        |        |         |         |   |
| 2646   | N   | N   | . THR THR THR A A 350 350 . | 0.1191 | 0.1105 | 0.1230 | -0.0076 | 0.0095  |   |
| 0.0174 | 1   | .   |                             |        |        |        |         |         |   |
| 2647   | CA  | CA  | . THR THR THR A A 350 350 . | 0.1100 | 0.1085 | 0.0971 | -0.0187 | -0.0156 |   |
| 0.0200 | 1   | .   |                             |        |        |        |         |         |   |
| 2648   | CB  | CB  | . THR THR THR A A 350 350 . | 0.1061 | 0.0910 | 0.1029 | -0.0126 | -0.0221 |   |
| 0.0096 | 1   | .   |                             |        |        |        |         |         |   |
| 2649   | OG1 | OG1 | . THR THR THR A A 350 350 . | 0.1327 | 0.1175 | 0.1455 | -0.0195 | -0.0107 |   |
| 0.0466 | 1   | .   |                             |        |        |        |         |         |   |
| 2650   | CG2 | CG2 | . THR THR THR A A 350 350 . | 0.1479 | 0.1461 | 0.1464 | -0.0331 | -0.0305 |   |
| 0.0154 | 1   | .   |                             |        |        |        |         |         |   |
| 2651   | C   | C   | . THR THR THR A A 350 350 . | 0.1184 | 0.0992 | 0.1023 | -0.0207 | 0.0057  |   |
| 0.0184 | 1   | .   |                             |        |        |        |         |         |   |
| 2652   | O   | O   | . THR THR THR A A 350 350 . | 0.0929 | 0.1130 | 0.1002 | -0.0182 | 0.0071  |   |
| 0.0011 | 1   | .   |                             |        |        |        |         |         |   |
| 2653   | N   | N   | . GLU GLU GLU A A 351 351 . | 0.1153 | 0.1100 | 0.1276 | -0.0012 | -0.0063 |   |
| 0.0087 | 1   | .   |                             |        |        |        |         |         |   |
| 2654   | CA  | CA  | . GLU GLU GLU A A 351 351 . | 0.1211 | 0.1046 | 0.1394 | 0.0015  | 0.0066  |   |
| 0.0055 | 1   | .   |                             |        |        |        |         |         |   |
| 2655   | CB  | CB  | . GLU GLU GLU A A 351 351 . | 0.1399 | 0.1056 | 0.1223 | 0.0229  | 0.0082  | - |
| 0.0057 | 1   | .   |                             |        |        |        |         |         |   |
| 2656   | CG  | CG  | . GLU GLU GLU A A 351 351 . | 0.1847 | 0.1259 | 0.1698 | 0.0180  | -0.0009 | - |
| 0.0257 | 1   | .   |                             |        |        |        |         |         |   |
| 2657   | CD  | CD  | . GLU GLU GLU A A 351 351 . | 0.1779 | 0.1460 | 0.1737 | 0.0158  | 0.0125  | - |
| 0.0344 | 1   | .   |                             |        |        |        |         |         |   |
| 2658   | OE1 | OE1 | . GLU GLU GLU A A 351 351 . | 0.2149 | 0.1861 | 0.1750 | 0.0024  | 0.0096  | - |
| 0.0110 | 1   | .   |                             |        |        |        |         |         |   |
| 2659   | OE2 | OE2 | . GLU GLU GLU A A 351 351 . | 0.2397 | 0.1935 | 0.1847 | 0.0380  | 0.0063  |   |
| 0.0297 | 1   | .   |                             |        |        |        |         |         |   |
| 2660   | C   | C   | . GLU GLU GLU A A 351 351 . | 0.1291 | 0.1238 | 0.1280 | 0.0062  | 0.0050  | - |
| 0.0094 | 1   | .   |                             |        |        |        |         |         |   |
| 2661   | O   | O   | . GLU GLU GLU A A 351 351 . | 0.1329 | 0.1303 | 0.1365 | -0.0148 | -0.0099 | - |
| 0.0035 | 1   | .   |                             |        |        |        |         |         |   |

|        |     |     |                   |         |                                          |
|--------|-----|-----|-------------------|---------|------------------------------------------|
| 2662   | N   | N   | . ALA ALA ALA A A | 352 352 | . 0.1314 0.0935 0.1232 -0.0120 0.0158    |
| 0.0070 | 1   | .   |                   |         |                                          |
| 2663   | CA  | CA  | . ALA ALA ALA A A | 352 352 | . 0.1138 0.1027 0.1067 -0.0075 0.0050    |
| 0.0063 | 1   | .   |                   |         |                                          |
| 2664   | CB  | CB  | . ALA ALA ALA A A | 352 352 | . 0.1437 0.1074 0.0727 -0.0182 -0.0010   |
| 0.0328 | 1   | .   |                   |         |                                          |
| 2665   | C   | C   | . ALA ALA ALA A A | 352 352 | . 0.1330 0.1229 0.1179 -0.0123 -0.0041 - |
| 0.0052 | 1   | .   |                   |         |                                          |
| 2666   | O   | O   | . ALA ALA ALA A A | 352 352 | . 0.1366 0.1319 0.1188 -0.0152 -0.0158   |
| 0.0051 | 1   | .   |                   |         |                                          |
| 2667   | N   | N   | . ILE ILE ILE A A | 353 353 | . 0.1106 0.1252 0.1123 -0.0066 0.0190    |
| 0.0028 | 1   | .   |                   |         |                                          |
| 2668   | CA  | CA  | . ILE ILE ILE A A | 353 353 | . 0.1240 0.1462 0.1358 -0.0086 0.0008 -  |
| 0.0022 | 1   | .   |                   |         |                                          |
| 2669   | CB  | CB  | . ILE ILE ILE A A | 353 353 | . 0.1083 0.1288 0.1221 -0.0164 -0.0092 - |
| 0.0045 | 1   | .   |                   |         |                                          |
| 2670   | CG1 | CG1 | . ILE ILE ILE A A | 353 353 | . 0.1529 0.1278 0.1395 0.0065 -0.0191 -  |
| 0.0094 | 1   | .   |                   |         |                                          |
| 2671   | CD1 | CD1 | . ILE ILE ILE A A | 353 353 | . 0.1384 0.1975 0.1679 0.0287 -0.0045    |
| 0.0091 | 1   | .   |                   |         |                                          |
| 2672   | CG2 | CG2 | . ILE ILE ILE A A | 353 353 | . 0.1215 0.1815 0.1389 -0.0272 0.0261 -  |
| 0.0195 | 1   | .   |                   |         |                                          |
| 2673   | C   | C   | . ILE ILE ILE A A | 353 353 | . 0.1211 0.1259 0.1357 -0.0315 0.0161    |
| 0.0151 | 1   | .   |                   |         |                                          |
| 2674   | O   | O   | . ILE ILE ILE A A | 353 353 | . 0.1433 0.1554 0.1275 -0.0061 0.0162 -  |
| 0.0075 | 1   | .   |                   |         |                                          |
| 2675   | N   | N   | . GLN GLN GLN A A | 354 354 | . 0.1299 0.1462 0.1562 -0.0022 0.0106    |
| 0.0012 | 1   | .   |                   |         |                                          |
| 2676   | CA  | CA  | . GLN GLN GLN A A | 354 354 | . 0.1698 0.1568 0.1558 -0.0121 -0.0023   |
| 0.0147 | 1   | .   |                   |         |                                          |
| 2677   | CB  | CB  | . GLN GLN GLN A A | 354 354 | . 0.2081 0.1461 0.1736 -0.0067 0.0038    |
| 0.0124 | 1   | .   |                   |         |                                          |
| 2678   | CG  | CG  | . GLN GLN GLN A A | 354 354 | . 0.3074 0.2797 0.2596 -0.0354 -0.0249   |
| 0.0545 | 1   | .   |                   |         |                                          |
| 2679   | CD  | CD  | . GLN GLN GLN A A | 354 354 | . 0.4230 0.3376 0.3561 -0.0198 0.0046    |
| 0.0476 | 1   | .   |                   |         |                                          |
| 2680   | OE1 | OE1 | . GLN GLN GLN A A | 354 354 | . 0.4864 0.4244 0.3434 -0.0653 -0.0281   |
| 0.0935 | 1   | .   |                   |         |                                          |
| 2681   | NE2 | NE2 | . GLN GLN GLN A A | 354 354 | . 0.4475 0.3279 0.3606 0.0354 0.0435     |
| 0.1286 | 1   | .   |                   |         |                                          |
| 2682   | C   | C   | . GLN GLN GLN A A | 354 354 | . 0.1523 0.1397 0.1451 -0.0038 -0.0040   |
| 0.0010 | 1   | .   |                   |         |                                          |
| 2683   | O   | O   | . GLN GLN GLN A A | 354 354 | . 0.1528 0.1542 0.1557 -0.0136 -0.0035   |
| 0.0053 | 1   | .   |                   |         |                                          |
| 2684   | N   | N   | . ALA ALA ALA A A | 355 355 | . 0.1250 0.1209 0.1260 -0.0066 0.0050 -  |
| 0.0013 | 1   | .   |                   |         |                                          |
| 2685   | CA  | CA  | . ALA ALA ALA A A | 355 355 | . 0.1088 0.1094 0.1268 0.0076 0.0111     |
| 0.0031 | 1   | .   |                   |         |                                          |
| 2686   | CB  | CB  | . ALA ALA ALA A A | 355 355 | . 0.1113 0.1204 0.1105 0.0294 0.0014 -   |
| 0.0046 | 1   | .   |                   |         |                                          |
| 2687   | C   | C   | . ALA ALA ALA A A | 355 355 | . 0.1276 0.1333 0.1227 0.0064 0.0033     |
| 0.0055 | 1   | .   |                   |         |                                          |
| 2688   | O   | O   | . ALA ALA ALA A A | 355 355 | . 0.1088 0.1423 0.1310 0.0146 0.0000     |
| 0.0194 | 1   | .   |                   |         |                                          |
| 2689   | N   | N   | . CYS CYS CYS A A | 356 356 | . 0.1123 0.1222 0.1140 0.0199 0.0079     |
| 0.0105 | 1   | .   |                   |         |                                          |
| 2690   | CA  | CA  | . CYS CYS CYS A A | 356 356 | . 0.1339 0.1285 0.0979 0.0164 -0.0051    |
| 0.0062 | 1   | .   |                   |         |                                          |
| 2691   | CB  | CB  | . CYS CYS CYS A A | 356 356 | . 0.0999 0.1146 0.1077 0.0436 -0.0029 -  |
| 0.0274 | 1   | .   |                   |         |                                          |









|        |     |     |                             |        |        |        |         |         |   |
|--------|-----|-----|-----------------------------|--------|--------|--------|---------|---------|---|
| 2812   | CA  | CA  | . SER SER SER A A 372 372 . | 0.1077 | 0.1075 | 0.0977 | 0.0128  | 0.0064  |   |
| 0.0130 | 1   | .   |                             |        |        |        |         |         |   |
| 2813   | CB  | CB  | . SER SER SER A A 372 372 . | 0.0425 | 0.0691 | 0.0271 | -0.0275 | -0.0055 |   |
| 0.0089 | 1   | .   |                             |        |        |        |         |         |   |
| 2814   | OG  | OG  | . SER SER SER A A 372 372 . | 0.2369 | 0.1791 | 0.2680 | -0.0455 | -0.0294 | - |
| 0.0541 | 1   | .   |                             |        |        |        |         |         |   |
| 2815   | C   | C   | . SER SER SER A A 372 372 . | 0.0567 | 0.0850 | 0.0789 | 0.0026  | 0.0116  |   |
| 0.0215 | 1   | .   |                             |        |        |        |         |         |   |
| 2816   | O   | O   | . SER SER SER A A 372 372 . | 0.0871 | 0.0961 | 0.1001 | 0.0265  | 0.0163  |   |
| 0.0145 | 1   | .   |                             |        |        |        |         |         |   |
| 2817   | N   | N   | . GLY GLY GLY A A 373 373 . | 0.0788 | 0.0932 | 0.0842 | 0.0052  | 0.0290  | - |
| 0.0127 | 1   | .   |                             |        |        |        |         |         |   |
| 2818   | CA  | CA  | . GLY GLY GLY A A 373 373 . | 0.0703 | 0.1016 | 0.0825 | -0.0033 | 0.0075  | - |
| 0.0031 | 1   | .   |                             |        |        |        |         |         |   |
| 2819   | C   | C   | . GLY GLY GLY A A 373 373 . | 0.0623 | 0.0782 | 0.0924 | 0.0023  | 0.0129  |   |
| 0.0098 | 1   | .   |                             |        |        |        |         |         |   |
| 2820   | O   | O   | . GLY GLY GLY A A 373 373 . | 0.0644 | 0.0997 | 0.1139 | 0.0118  | 0.0121  |   |
| 0.0169 | 1   | .   |                             |        |        |        |         |         |   |
| 2821   | N   | N   | . GLU GLU GLU A A 374 374 . | 0.0695 | 0.0840 | 0.0656 | 0.0090  | -0.0060 |   |
| 0.0072 | 1   | .   |                             |        |        |        |         |         |   |
| 2822   | CA  | CA  | . GLU GLU GLU A A 374 374 . | 0.0821 | 0.0926 | 0.0776 | 0.0074  | 0.0007  | - |
| 0.0083 | 1   | .   |                             |        |        |        |         |         |   |
| 2823   | CB  | CB  | . GLU GLU GLU A A 374 374 . | 0.0993 | 0.0660 | 0.0846 | 0.0121  | 0.0001  |   |
| 0.0052 | 1   | .   |                             |        |        |        |         |         |   |
| 2824   | CG  | CG  | . GLU GLU GLU A A 374 374 . | 0.1294 | 0.1024 | 0.0598 | -0.0105 | 0.0118  |   |
| 0.0133 | 1   | .   |                             |        |        |        |         |         |   |
| 2825   | CD  | CD  | . GLU GLU GLU A A 374 374 . | 0.0811 | 0.1064 | 0.0887 | 0.0138  | -0.0015 | - |
| 0.0018 | 1   | .   |                             |        |        |        |         |         |   |
| 2826   | OE1 | OE1 | . GLU GLU GLU A A 374 374 . | 0.0896 | 0.0935 | 0.1040 | -0.0061 | 0.0228  |   |
| 0.0043 | 1   | .   |                             |        |        |        |         |         |   |
| 2827   | OE2 | OE2 | . GLU GLU GLU A A 374 374 . | 0.1347 | 0.1025 | 0.0989 | 0.0355  | 0.0123  | - |
| 0.0036 | 1   | .   |                             |        |        |        |         |         |   |
| 2828   | C   | C   | . GLU GLU GLU A A 374 374 . | 0.0960 | 0.0870 | 0.0885 | -0.0027 | 0.0013  | - |
| 0.0001 | 1   | .   |                             |        |        |        |         |         |   |
| 2829   | O   | O   | . GLU GLU GLU A A 374 374 . | 0.0956 | 0.0825 | 0.0887 | -0.0021 | 0.0077  | - |
| 0.0048 | 1   | .   |                             |        |        |        |         |         |   |
| 2830   | N   | N   | . THR THR THR A A 375 375 . | 0.0828 | 0.0884 | 0.0895 | 0.0062  | 0.0046  |   |
| 0.0085 | 1   | .   |                             |        |        |        |         |         |   |
| 2831   | CA  | CA  | . THR THR THR A A 375 375 . | 0.0753 | 0.0813 | 0.0786 | -0.0011 | 0.0036  |   |
| 0.0018 | 1   | .   |                             |        |        |        |         |         |   |
| 2832   | CB  | CB  | . THR THR THR A A 375 375 . | 0.0856 | 0.1004 | 0.0889 | 0.0063  | 0.0186  | - |
| 0.0129 | 1   | .   |                             |        |        |        |         |         |   |
| 2833   | OG1 | OG1 | . THR THR THR A A 375 375 . | 0.1040 | 0.1058 | 0.0944 | -0.0093 | 0.0309  | - |
| 0.0040 | 1   | .   |                             |        |        |        |         |         |   |
| 2834   | CG2 | CG2 | . THR THR THR A A 375 375 . | 0.0839 | 0.0982 | 0.1524 | 0.0402  | 0.0250  | - |
| 0.0024 | 1   | .   |                             |        |        |        |         |         |   |
| 2835   | C   | C   | . THR THR THR A A 375 375 . | 0.0994 | 0.0704 | 0.0924 | 0.0059  | -0.0086 |   |
| 0.0024 | 1   | .   |                             |        |        |        |         |         |   |
| 2836   | O   | O   | . THR THR THR A A 375 375 . | 0.0996 | 0.0997 | 0.0767 | 0.0099  | 0.0125  |   |
| 0.0142 | 1   | .   |                             |        |        |        |         |         |   |
| 2837   | N   | N   | . GLU GLU GLU A A 376 376 . | 0.0904 | 0.0901 | 0.1098 | 0.0125  | 0.0088  |   |
| 0.0171 | 1   | .   |                             |        |        |        |         |         |   |
| 2838   | CA  | CA  | . GLU GLU GLU A A 376 376 . | 0.0798 | 0.1151 | 0.1042 | 0.0258  | 0.0035  |   |
| 0.0114 | 1   | .   |                             |        |        |        |         |         |   |
| 2839   | CB  | CB  | . GLU GLU GLU A A 376 376 . | 0.1322 | 0.1035 | 0.0959 | 0.0066  | -0.0195 | - |
| 0.0007 | 1   | .   |                             |        |        |        |         |         |   |
| 2840   | CG  | CG  | . GLU GLU GLU A A 376 376 . | 0.0868 | 0.1211 | 0.1035 | 0.0186  | 0.0031  | - |
| 0.0221 | 1   | .   |                             |        |        |        |         |         |   |
| 2841   | CD  | CD  | . GLU GLU GLU A A 376 376 . | 0.1362 | 0.1337 | 0.1085 | -0.0022 | -0.0016 | - |
| 0.0184 | 1   | .   |                             |        |        |        |         |         |   |

|        |     |     |                   |         |                                          |
|--------|-----|-----|-------------------|---------|------------------------------------------|
| 2842   | OE1 | OE1 | . GLU GLU GLU A A | 376 376 | . 0.1694 0.1519 0.1223 -0.0164 0.0012 -  |
| 0.0180 | 1 . |     |                   |         |                                          |
| 2843   | OE2 | OE2 | . GLU GLU GLU A A | 376 376 | . 0.1231 0.1215 0.1276 -0.0131 -0.0028 - |
| 0.0102 | 1 . |     |                   |         |                                          |
| 2844   | C   | C   | . GLU GLU GLU A A | 376 376 | . 0.1025 0.1015 0.0924 0.0241 0.0053     |
| 0.0074 | 1 . |     |                   |         |                                          |
| 2845   | O   | O   | . GLU GLU GLU A A | 376 376 | . 0.0993 0.1541 0.1017 0.0277 0.0172     |
| 0.0101 | 1 . |     |                   |         |                                          |
| 2846   | N   | N   | . ASP ASP ASP A A | 377 377 | . 0.1119 0.1058 0.0841 0.0032 0.0225     |
| 0.0043 | 1 . |     |                   |         |                                          |
| 2847   | CA  | CA  | . ASP ASP ASP A A | 377 377 | . 0.1272 0.1197 0.0903 0.0039 0.0175 -   |
| 0.0031 | 1 . |     |                   |         |                                          |
| 2848   | CB  | CB  | . ASP ASP ASP A A | 377 377 | . 0.1415 0.1192 0.1136 -0.0023 0.0255    |
| 0.0098 | 1 . |     |                   |         |                                          |
| 2849   | CG  | CG  | . ASP ASP ASP A A | 377 377 | . 0.2052 0.1367 0.1620 -0.0128 -0.0142   |
| 0.0185 | 1 . |     |                   |         |                                          |
| 2850   | OD1 | OD1 | . ASP ASP ASP A A | 377 377 | . 0.3371 0.1402 0.1979 -0.0045 0.0200    |
| 0.0153 | 1 . |     |                   |         |                                          |
| 2851   | OD2 | OD2 | . ASP ASP ASP A A | 377 377 | . 0.1418 0.1688 0.1598 -0.0354 0.0258 -  |
| 0.0048 | 1 . |     |                   |         |                                          |
| 2852   | C   | C   | . ASP ASP ASP A A | 377 377 | . 0.1137 0.1192 0.1065 -0.0115 0.0089 -  |
| 0.0130 | 1 . |     |                   |         |                                          |
| 2853   | O   | O   | . ASP ASP ASP A A | 377 377 | . 0.1235 0.1153 0.1121 0.0126 -0.0082 -  |
| 0.0167 | 1 . |     |                   |         |                                          |
| 2854   | N   | N   | . THR THR THR A A | 378 378 | . 0.0983 0.1058 0.0851 -0.0189 0.0080 -  |
| 0.0255 | 1 . |     |                   |         |                                          |
| 2855   | CA  | CA  | . THR THR THR A A | 378 378 | . 0.1076 0.0974 0.0778 -0.0015 0.0062    |
| 0.0030 | 1 . |     |                   |         |                                          |
| 2856   | CB  | CB  | . THR THR THR A A | 378 378 | . 0.1128 0.1097 0.1108 -0.0130 0.0177    |
| 0.0200 | 1 . |     |                   |         |                                          |
| 2857   | OG1 | OG1 | . THR THR THR A A | 378 378 | . 0.0826 0.1242 0.1239 0.0122 0.0096     |
| 0.0155 | 1 . |     |                   |         |                                          |
| 2858   | CG2 | CG2 | . THR THR THR A A | 378 378 | . 0.1826 0.1161 0.0563 -0.0168 0.0113    |
| 0.0348 | 1 . |     |                   |         |                                          |
| 2859   | C   | C   | . THR THR THR A A | 378 378 | . 0.1029 0.1039 0.1007 -0.0029 0.0074 -  |
| 0.0063 | 1 . |     |                   |         |                                          |
| 2860   | O   | O   | . THR THR THR A A | 378 378 | . 0.0838 0.0912 0.0855 -0.0003 -0.0048 - |
| 0.0044 | 1 . |     |                   |         |                                          |
| 2861   | N   | N   | . PHE PHE PHE A A | 379 379 | . 0.0768 0.0682 0.0751 -0.0109 0.0034    |
| 0.0121 | 1 . |     |                   |         |                                          |
| 2862   | CA  | CA  | . PHE PHE PHE A A | 379 379 | . 0.1175 0.0948 0.0910 0.0036 -0.0008    |
| 0.0051 | 1 . |     |                   |         |                                          |
| 2863   | CB  | CB  | . PHE PHE PHE A A | 379 379 | . 0.1122 0.0793 0.0970 0.0082 0.0017     |
| 0.0408 | 1 . |     |                   |         |                                          |
| 2864   | CG  | CG  | . PHE PHE PHE A A | 379 379 | . 0.1014 0.0549 0.0978 0.0017 0.0096     |
| 0.0128 | 1 . |     |                   |         |                                          |
| 2865   | CD1 | CD1 | . PHE PHE PHE A A | 379 379 | . 0.1597 0.0860 0.0734 0.0042 0.0260     |
| 0.0366 | 1 . |     |                   |         |                                          |
| 2866   | CE1 | CE1 | . PHE PHE PHE A A | 379 379 | . 0.1708 0.1050 0.1177 -0.0018 0.0541    |
| 0.0453 | 1 . |     |                   |         |                                          |
| 2867   | CZ  | CZ  | . PHE PHE PHE A A | 379 379 | . 0.1323 0.0904 0.1709 -0.0082 0.0066    |
| 0.0043 | 1 . |     |                   |         |                                          |
| 2868   | CE2 | CE2 | . PHE PHE PHE A A | 379 379 | . 0.1624 0.1290 0.1639 0.0292 0.0327     |
| 0.0641 | 1 . |     |                   |         |                                          |
| 2869   | CD2 | CD2 | . PHE PHE PHE A A | 379 379 | . 0.0996 0.1087 0.1744 0.0087 0.0327     |
| 0.0581 | 1 . |     |                   |         |                                          |
| 2870   | C   | C   | . PHE PHE PHE A A | 379 379 | . 0.0820 0.1050 0.0858 -0.0106 0.0017    |
| 0.0042 | 1 . |     |                   |         |                                          |
| 2871   | O   | O   | . PHE PHE PHE A A | 379 379 | . 0.0937 0.0836 0.0978 0.0143 0.0060     |
| 0.0028 | 1 . |     |                   |         |                                          |



|        |     |     |                   |         |                                          |
|--------|-----|-----|-------------------|---------|------------------------------------------|
| 2872   | N   | N   | . ILE ILE ILE A A | 380 380 | . 0.1046 0.1078 0.1022 -0.0010 0.0026    |
| 0.0148 | 1   | .   |                   |         |                                          |
| 2873   | CA  | CA  | . ILE ILE ILE A A | 380 380 | . 0.0570 0.0834 0.0820 0.0055 -0.0048 -  |
| 0.0016 | 1   | .   |                   |         |                                          |
| 2874   | CB  | CB  | . ILE ILE ILE A A | 380 380 | . 0.0664 0.0744 0.0895 0.0115 0.0192     |
| 0.0146 | 1   | .   |                   |         |                                          |
| 2875   | CG1 | CG1 | . ILE ILE ILE A A | 380 380 | . 0.0668 0.0772 0.1073 -0.0058 0.0160    |
| 0.0362 | 1   | .   |                   |         |                                          |
| 2876   | CD1 | CD1 | . ILE ILE ILE A A | 380 380 | . 0.1036 0.1166 0.1643 0.0100 0.0525 -   |
| 0.0182 | 1   | .   |                   |         |                                          |
| 2877   | CG2 | CG2 | . ILE ILE ILE A A | 380 380 | . 0.1152 0.0945 0.0929 0.0478 0.0158 -   |
| 0.0165 | 1   | .   |                   |         |                                          |
| 2878   | C   | C   | . ILE ILE ILE A A | 380 380 | . 0.0749 0.0847 0.0824 0.0068 -0.0002    |
| 0.0106 | 1   | .   |                   |         |                                          |
| 2879   | O   | O   | . ILE ILE ILE A A | 380 380 | . 0.0766 0.0828 0.0819 0.0129 -0.0051 -  |
| 0.0034 | 1   | .   |                   |         |                                          |
| 2880   | N   | N   | . ALA ALA ALA A A | 381 381 | . 0.0959 0.0964 0.0964 0.0149 0.0086     |
| 0.0174 | 1   | .   |                   |         |                                          |
| 2881   | CA  | CA  | . ALA ALA ALA A A | 381 381 | . 0.1111 0.0798 0.0659 -0.0051 -0.0008   |
| 0.0163 | 1   | .   |                   |         |                                          |
| 2882   | CB  | CB  | . ALA ALA ALA A A | 381 381 | . 0.0896 0.0865 0.1076 0.0155 -0.0073    |
| 0.0162 | 1   | .   |                   |         |                                          |
| 2883   | C   | C   | . ALA ALA ALA A A | 381 381 | . 0.0841 0.0980 0.0952 -0.0060 -0.0022   |
| 0.0025 | 1   | .   |                   |         |                                          |
| 2884   | O   | O   | . ALA ALA ALA A A | 381 381 | . 0.0796 0.0987 0.0895 -0.0030 0.0053 -  |
| 0.0139 | 1   | .   |                   |         |                                          |
| 2885   | N   | N   | . ASP ASP ASP A A | 382 382 | . 0.0923 0.1024 0.0959 -0.0179 -0.0047 - |
| 0.0043 | 1   | .   |                   |         |                                          |
| 2886   | CA  | CA  | . ASP ASP ASP A A | 382 382 | . 0.0757 0.0891 0.0517 -0.0217 0.0017    |
| 0.0071 | 1   | .   |                   |         |                                          |
| 2887   | CB  | CB  | . ASP ASP ASP A A | 382 382 | . 0.1048 0.1030 0.1135 -0.0071 -0.0040   |
| 0.0185 | 1   | .   |                   |         |                                          |
| 2888   | CG  | CG  | . ASP ASP ASP A A | 382 382 | . 0.1701 0.1395 0.1644 0.0004 0.0098     |
| 0.0168 | 1   | .   |                   |         |                                          |
| 2889   | OD1 | OD1 | . ASP ASP ASP A A | 382 382 | . 0.1755 0.1733 0.1228 0.0018 0.0284     |
| 0.0443 | 1   | .   |                   |         |                                          |
| 2890   | OD2 | OD2 | . ASP ASP ASP A A | 382 382 | . 0.1716 0.1352 0.1601 -0.0191 0.0228 -  |
| 0.0143 | 1   | .   |                   |         |                                          |
| 2891   | C   | C   | . ASP ASP ASP A A | 382 382 | . 0.0890 0.0845 0.0883 0.0085 0.0097     |
| 0.0035 | 1   | .   |                   |         |                                          |
| 2892   | O   | O   | . ASP ASP ASP A A | 382 382 | . 0.0933 0.1152 0.0965 0.0166 0.0155     |
| 0.0098 | 1   | .   |                   |         |                                          |
| 2893   | N   | N   | . LEU LEU LEU A A | 383 383 | . 0.1036 0.0849 0.0804 -0.0039 -0.0024   |
| 0.0100 | 1   | .   |                   |         |                                          |
| 2894   | CA  | CA  | . LEU LEU LEU A A | 383 383 | . 0.0939 0.0768 0.0722 0.0101 0.0033 -   |
| 0.0010 | 1   | .   |                   |         |                                          |
| 2895   | CB  | CB  | . LEU LEU LEU A A | 383 383 | . 0.0765 0.1047 0.1213 0.0173 0.0077 -   |
| 0.0117 | 1   | .   |                   |         |                                          |
| 2896   | CG  | CG  | . LEU LEU LEU A A | 383 383 | . 0.0957 0.1126 0.1184 -0.0008 0.0109    |
| 0.0200 | 1   | .   |                   |         |                                          |
| 2897   | CD1 | CD1 | . LEU LEU LEU A A | 383 383 | . 0.1403 0.1102 0.1143 -0.0194 -0.0259   |
| 0.0441 | 1   | .   |                   |         |                                          |
| 2898   | CD2 | CD2 | . LEU LEU LEU A A | 383 383 | . 0.0979 0.1061 0.1203 0.0047 0.0132 -   |
| 0.0267 | 1   | .   |                   |         |                                          |
| 2899   | C   | C   | . LEU LEU LEU A A | 383 383 | . 0.1051 0.0911 0.0848 -0.0071 -0.0035   |
| 0.0031 | 1   | .   |                   |         |                                          |
| 2900   | O   | O   | . LEU LEU LEU A A | 383 383 | . 0.1277 0.1174 0.0970 0.0140 -0.0021    |
| 0.0022 | 1   | .   |                   |         |                                          |
| 2901   | N   | N   | . VAL VAL VAL A A | 384 384 | . 0.1057 0.0719 0.0810 -0.0050 -0.0119 - |
| 0.0034 | 1   | .   |                   |         |                                          |



|        |     |     |                             |        |        |        |         |         |   |
|--------|-----|-----|-----------------------------|--------|--------|--------|---------|---------|---|
| 2932   | O   | O   | . CYS CYS CYS A A 388 388 . | 0.1569 | 0.1789 | 0.1150 | 0.0071  | 0.0004  | - |
| 0.0374 | 1   | .   |                             |        |        |        |         |         |   |
| 2933   | N   | N   | . THR THR THR A A 389 389 . | 0.1011 | 0.0959 | 0.0865 | 0.0090  | -0.0032 |   |
| 0.0000 | 1   | .   |                             |        |        |        |         |         |   |
| 2934   | CA  | CA  | . THR THR THR A A 389 389 . | 0.1030 | 0.0936 | 0.0769 | -0.0003 | 0.0015  | - |
| 0.0040 | 1   | .   |                             |        |        |        |         |         |   |
| 2935   | CB  | CB  | . THR THR THR A A 389 389 . | 0.1170 | 0.0925 | 0.1257 | 0.0036  | 0.0101  |   |
| 0.0015 | 1   | .   |                             |        |        |        |         |         |   |
| 2936   | OG1 | OG1 | . THR THR THR A A 389 389 . | 0.1636 | 0.1360 | 0.0977 | 0.0065  | -0.0057 |   |
| 0.0030 | 1   | .   |                             |        |        |        |         |         |   |
| 2937   | CG2 | CG2 | . THR THR THR A A 389 389 . | 0.0753 | 0.0801 | 0.0694 | -0.0174 | 0.0398  | - |
| 0.0384 | 1   | .   |                             |        |        |        |         |         |   |
| 2938   | C   | C   | . THR THR THR A A 389 389 . | 0.1051 | 0.1018 | 0.1054 | 0.0071  | -0.0007 | - |
| 0.0037 | 1   | .   |                             |        |        |        |         |         |   |
| 2939   | O   | O   | . THR THR THR A A 389 389 . | 0.1420 | 0.1348 | 0.1249 | 0.0129  | -0.0188 | - |
| 0.0199 | 1   | .   |                             |        |        |        |         |         |   |
| 2940   | N   | N   | . GLY GLY GLY A A 390 390 . | 0.0841 | 0.0891 | 0.0918 | 0.0080  | -0.0031 |   |
| 0.0006 | 1   | .   |                             |        |        |        |         |         |   |
| 2941   | CA  | CA  | . GLY GLY GLY A A 390 390 . | 0.0921 | 0.0809 | 0.0998 | 0.0109  | 0.0070  |   |
| 0.0037 | 1   | .   |                             |        |        |        |         |         |   |
| 2942   | C   | C   | . GLY GLY GLY A A 390 390 . | 0.1153 | 0.0780 | 0.0741 | 0.0112  | 0.0106  |   |
| 0.0112 | 1   | .   |                             |        |        |        |         |         |   |
| 2943   | O   | O   | . GLY GLY GLY A A 390 390 . | 0.1045 | 0.0938 | 0.0604 | 0.0015  | 0.0028  | - |
| 0.0176 | 1   | .   |                             |        |        |        |         |         |   |
| 2944   | N   | N   | . GLN GLN GLN A A 391 391 . | 0.0968 | 0.0790 | 0.0707 | 0.0029  | 0.0066  |   |
| 0.0122 | 1   | .   |                             |        |        |        |         |         |   |
| 2945   | CA  | CA  | . GLN GLN GLN A A 391 391 . | 0.0896 | 0.0857 | 0.0835 | 0.0043  | 0.0001  |   |
| 0.0052 | 1   | .   |                             |        |        |        |         |         |   |
| 2946   | CB  | CB  | . GLN GLN GLN A A 391 391 . | 0.0988 | 0.1179 | 0.1089 | 0.0023  | -0.0053 |   |
| 0.0223 | 1   | .   |                             |        |        |        |         |         |   |
| 2947   | CG  | CG  | . GLN GLN GLN A A 391 391 . | 0.0853 | 0.1492 | 0.1414 | 0.0201  | -0.0131 |   |
| 0.0267 | 1   | .   |                             |        |        |        |         |         |   |
| 2948   | CD  | CD  | . GLN GLN GLN A A 391 391 . | 0.0932 | 0.1456 | 0.1126 | -0.0045 | -0.0022 |   |
| 0.0031 | 1   | .   |                             |        |        |        |         |         |   |
| 2949   | OE1 | OE1 | . GLN GLN GLN A A 391 391 . | 0.1234 | 0.1501 | 0.1635 | 0.0078  | -0.0210 |   |
| 0.0148 | 1   | .   |                             |        |        |        |         |         |   |
| 2950   | NE2 | NE2 | . GLN GLN GLN A A 391 391 . | 0.1229 | 0.1524 | 0.1209 | 0.0253  | -0.0353 | - |
| 0.0028 | 1   | .   |                             |        |        |        |         |         |   |
| 2951   | C   | C   | . GLN GLN GLN A A 391 391 . | 0.0761 | 0.0600 | 0.0626 | 0.0020  | 0.0085  |   |
| 0.0049 | 1   | .   |                             |        |        |        |         |         |   |
| 2952   | O   | O   | . GLN GLN GLN A A 391 391 . | 0.0784 | 0.0878 | 0.0789 | 0.0010  | 0.0050  |   |
| 0.0160 | 1   | .   |                             |        |        |        |         |         |   |
| 2953   | N   | N   | . ILE ILE ILE A A 392 392 . | 0.0798 | 0.0893 | 0.0495 | 0.0025  | -0.0080 | - |
| 0.0035 | 1   | .   |                             |        |        |        |         |         |   |
| 2954   | CA  | CA  | . ILE ILE ILE A A 392 392 . | 0.0678 | 0.0933 | 0.0611 | 0.0036  | 0.0035  | - |
| 0.0106 | 1   | .   |                             |        |        |        |         |         |   |
| 2955   | CB  | CB  | . ILE ILE ILE A A 392 392 . | 0.1179 | 0.0940 | 0.0700 | 0.0062  | -0.0195 | - |
| 0.0060 | 1   | .   |                             |        |        |        |         |         |   |
| 2956   | CG1 | CG1 | . ILE ILE ILE A A 392 392 . | 0.1114 | 0.0983 | 0.0915 | 0.0295  | 0.0018  | - |
| 0.0364 | 1   | .   |                             |        |        |        |         |         |   |
| 2957   | CD1 | CD1 | . ILE ILE ILE A A 392 392 . | 0.1118 | 0.1257 | 0.1038 | -0.0155 | 0.0056  | - |
| 0.0406 | 1   | .   |                             |        |        |        |         |         |   |
| 2958   | CG2 | CG2 | . ILE ILE ILE A A 392 392 . | 0.0787 | 0.0924 | 0.0965 | 0.0498  | -0.0128 |   |
| 0.0175 | 1   | .   |                             |        |        |        |         |         |   |
| 2959   | C   | C   | . ILE ILE ILE A A 392 392 . | 0.0930 | 0.0862 | 0.0665 | -0.0005 | -0.0098 |   |
| 0.0069 | 1   | .   |                             |        |        |        |         |         |   |
| 2960   | O   | O   | . ILE ILE ILE A A 392 392 . | 0.0796 | 0.1012 | 0.0721 | -0.0047 | -0.0077 |   |
| 0.0097 | 1   | .   |                             |        |        |        |         |         |   |
| 2961   | N   | N   | . LYS LYS LYS A A 393 393 . | 0.0594 | 0.0802 | 0.0744 | -0.0030 | 0.0048  | - |
| 0.0014 | 1   | .   |                             |        |        |        |         |         |   |



|        |     |     |                             |        |        |        |         |         |   |
|--------|-----|-----|-----------------------------|--------|--------|--------|---------|---------|---|
| 2992   | O   | O   | . PRO PRO PRO A A 397 397 . | 0.1089 | 0.1032 | 0.1301 | 0.0070  | -0.0116 |   |
| 0.0019 | 1   | .   |                             |        |        |        |         |         |   |
| 2993   | N   | N   | . CYS CYS CYS A A 398 398 . | 0.0711 | 0.0933 | 0.0696 | -0.0127 | 0.0119  | - |
| 0.0125 | 1   | .   |                             |        |        |        |         |         |   |
| 2994   | CA  | CA  | . CYS CYS CYS A A 398 398 . | 0.0734 | 0.0640 | 0.0573 | -0.0110 | 0.0056  |   |
| 0.0022 | 1   | .   |                             |        |        |        |         |         |   |
| 2995   | CB  | CB  | . CYS CYS CYS A A 398 398 . | 0.0685 | 0.0928 | 0.0663 | -0.0085 | 0.0290  | - |
| 0.0045 | 1   | .   |                             |        |        |        |         |         |   |
| 2996   | SG  | SG  | . CYS CYS CYS A A 398 398 . | 0.1343 | 0.1292 | 0.1270 | -0.0206 | 0.0285  | - |
| 0.0005 | 1   | .   |                             |        |        |        |         |         |   |
| 2997   | C   | C   | . CYS CYS CYS A A 398 398 . | 0.0802 | 0.0774 | 0.0676 | -0.0043 | 0.0087  | - |
| 0.0044 | 1   | .   |                             |        |        |        |         |         |   |
| 2998   | O   | O   | . CYS CYS CYS A A 398 398 . | 0.0980 | 0.0674 | 0.0667 | 0.0001  | -0.0079 |   |
| 0.0007 | 1   | .   |                             |        |        |        |         |         |   |
| 2999   | N   | N   | . ARG ARG ARG A A 399 399 . | 0.0869 | 0.0728 | 0.0803 | -0.0083 | 0.0043  |   |
| 0.0077 | 1   | .   |                             |        |        |        |         |         |   |
| 3000   | CA  | CA  | . ARG ARG ARG A A 399 399 . | 0.0719 | 0.0770 | 0.0914 | -0.0088 | 0.0079  |   |
| 0.0006 | 1   | .   |                             |        |        |        |         |         |   |
| 3001   | CB  | CB  | . ARG ARG ARG A A 399 399 . | 0.0593 | 0.0411 | 0.0810 | -0.0046 | 0.0036  |   |
| 0.0036 | 1   | .   |                             |        |        |        |         |         |   |
| 3002   | CG  | CG  | . ARG ARG ARG A A 399 399 . | 0.0527 | 0.0948 | 0.0980 | -0.0012 | 0.0078  | - |
| 0.0041 | 1   | .   |                             |        |        |        |         |         |   |
| 3003   | CD  | CD  | . ARG ARG ARG A A 399 399 . | 0.0593 | 0.0511 | 0.1095 | 0.0293  | -0.0051 | - |
| 0.0115 | 1   | .   |                             |        |        |        |         |         |   |
| 3004   | NE  | NE  | . ARG ARG ARG A A 399 399 . | 0.0879 | 0.0619 | 0.0940 | -0.0001 | 0.0053  | - |
| 0.0095 | 1   | .   |                             |        |        |        |         |         |   |
| 3005   | CZ  | CZ  | . ARG ARG ARG A A 399 399 . | 0.0788 | 0.0812 | 0.0895 | 0.0018  | 0.0018  | - |
| 0.0085 | 1   | .   |                             |        |        |        |         |         |   |
| 3006   | NH1 | NH1 | . ARG ARG ARG A A 399 399 . | 0.0969 | 0.0684 | 0.1187 | -0.0141 | 0.0056  |   |
| 0.0024 | 1   | .   |                             |        |        |        |         |         |   |
| 3007   | NH2 | NH2 | . ARG ARG ARG A A 399 399 . | 0.1294 | 0.0769 | 0.0830 | -0.0019 | 0.0029  |   |
| 0.0049 | 1   | .   |                             |        |        |        |         |         |   |
| 3008   | C   | C   | . ARG ARG ARG A A 399 399 . | 0.0659 | 0.0721 | 0.0775 | -0.0012 | 0.0110  |   |
| 0.0001 | 1   | .   |                             |        |        |        |         |         |   |
| 3009   | O   | O   | . ARG ARG ARG A A 399 399 . | 0.1006 | 0.0621 | 0.0715 | 0.0011  | 0.0143  |   |
| 0.0005 | 1   | .   |                             |        |        |        |         |         |   |
| 3010   | N   | N   | . SER SER SER A A 400 400 . | 0.0566 | 0.0620 | 0.0760 | -0.0001 | 0.0141  | - |
| 0.0037 | 1   | .   |                             |        |        |        |         |         |   |
| 3011   | CA  | CA  | . SER SER SER A A 400 400 . | 0.0694 | 0.0618 | 0.0751 | 0.0016  | -0.0001 |   |
| 0.0008 | 1   | .   |                             |        |        |        |         |         |   |
| 3012   | CB  | CB  | . SER SER SER A A 400 400 . | 0.0513 | 0.0444 | 0.0628 | 0.0187  | -0.0029 |   |
| 0.0122 | 1   | .   |                             |        |        |        |         |         |   |
| 3013   | OG  | OG  | . SER SER SER A A 400 400 . | 0.0860 | 0.0713 | 0.0637 | 0.0056  | 0.0310  | - |
| 0.0066 | 1   | .   |                             |        |        |        |         |         |   |
| 3014   | C   | C   | . SER SER SER A A 400 400 . | 0.0772 | 0.0712 | 0.0705 | -0.0002 | 0.0002  |   |
| 0.0035 | 1   | .   |                             |        |        |        |         |         |   |
| 3015   | O   | O   | . SER SER SER A A 400 400 . | 0.0649 | 0.0581 | 0.0779 | 0.0102  | 0.0172  |   |
| 0.0108 | 1   | .   |                             |        |        |        |         |         |   |
| 3016   | N   | N   | . GLU GLU GLU A A 401 401 . | 0.0818 | 0.0828 | 0.0613 | 0.0059  | -0.0028 |   |
| 0.0051 | 1   | .   |                             |        |        |        |         |         |   |
| 3017   | CA  | CA  | . GLU GLU GLU A A 401 401 . | 0.1092 | 0.0812 | 0.0624 | 0.0109  | 0.0055  | - |
| 0.0087 | 1   | .   |                             |        |        |        |         |         |   |
| 3018   | CB  | CB  | . GLU GLU GLU A A 401 401 . | 0.0534 | 0.0845 | 0.0784 | -0.0005 | 0.0072  |   |
| 0.0094 | 1   | .   |                             |        |        |        |         |         |   |
| 3019   | CG  | CG  | . GLU GLU GLU A A 401 401 . | 0.0592 | 0.0899 | 0.0691 | -0.0096 | 0.0077  |   |
| 0.0415 | 1   | .   |                             |        |        |        |         |         |   |
| 3020   | CD  | CD  | . GLU GLU GLU A A 401 401 . | 0.1041 | 0.0855 | 0.1045 | -0.0206 | -0.0160 |   |
| 0.0407 | 1   | .   |                             |        |        |        |         |         |   |
| 3021   | OE1 | OE1 | . GLU GLU GLU A A 401 401 . | 0.0750 | 0.0782 | 0.0681 | 0.0000  | 0.0059  |   |
| 0.0002 | 1   | .   |                             |        |        |        |         |         |   |



|        |     |     |                             |        |        |        |         |         |   |
|--------|-----|-----|-----------------------------|--------|--------|--------|---------|---------|---|
| 3052   | CG  | CG  | . LYS LYS LYS A A 405 405 . | 0.1152 | 0.0839 | 0.0915 | -0.0019 | 0.0096  |   |
| 0.0098 | 1   | .   |                             |        |        |        |         |         |   |
| 3053   | CD  | CD  | . LYS LYS LYS A A 405 405 . | 0.0950 | 0.0649 | 0.0808 | 0.0075  | 0.0136  | - |
| 0.0243 | 1   | .   |                             |        |        |        |         |         |   |
| 3054   | CE  | CE  | . LYS LYS LYS A A 405 405 . | 0.0794 | 0.0755 | 0.0425 | 0.0270  | -0.0170 |   |
| 0.0090 | 1   | .   |                             |        |        |        |         |         |   |
| 3055   | NZ  | NZ  | . LYS LYS LYS A A 405 405 . | 0.0480 | 0.0853 | 0.0303 | 0.0103  | 0.0082  | - |
| 0.0070 | 1   | .   |                             |        |        |        |         |         |   |
| 3056   | C   | C   | . LYS LYS LYS A A 405 405 . | 0.0771 | 0.0700 | 0.0658 | 0.0055  | 0.0033  |   |
| 0.0084 | 1   | .   |                             |        |        |        |         |         |   |
| 3057   | O   | O   | . LYS LYS LYS A A 405 405 . | 0.0703 | 0.0807 | 0.0721 | 0.0101  | -0.0023 | - |
| 0.0194 | 1   | .   |                             |        |        |        |         |         |   |
| 3058   | N   | N   | . TYR TYR TYR A A 406 406 . | 0.0892 | 0.0680 | 0.0582 | 0.0108  | 0.0028  | - |
| 0.0164 | 1   | .   |                             |        |        |        |         |         |   |
| 3059   | CA  | CA  | . TYR TYR TYR A A 406 406 . | 0.0834 | 0.0681 | 0.0745 | 0.0004  | 0.0027  | - |
| 0.0020 | 1   | .   |                             |        |        |        |         |         |   |
| 3060   | CB  | CB  | . TYR TYR TYR A A 406 406 . | 0.0733 | 0.0915 | 0.0778 | -0.0217 | -0.0030 |   |
| 0.0062 | 1   | .   |                             |        |        |        |         |         |   |
| 3061   | CG  | CG  | . TYR TYR TYR A A 406 406 . | 0.0557 | 0.0758 | 0.0484 | 0.0181  | -0.0005 |   |
| 0.0053 | 1   | .   |                             |        |        |        |         |         |   |
| 3062   | CD1 | CD1 | . TYR TYR TYR A A 406 406 . | 0.0569 | 0.0539 | 0.0987 | -0.0049 | -0.0192 |   |
| 0.0214 | 1   | .   |                             |        |        |        |         |         |   |
| 3063   | CE1 | CE1 | . TYR TYR TYR A A 406 406 . | 0.0771 | 0.0800 | 0.0858 | 0.0096  | -0.0158 | - |
| 0.0139 | 1   | .   |                             |        |        |        |         |         |   |
| 3064   | CZ  | CZ  | . TYR TYR TYR A A 406 406 . | 0.0790 | 0.0792 | 0.0629 | 0.0149  | 0.0049  |   |
| 0.0191 | 1   | .   |                             |        |        |        |         |         |   |
| 3065   | OH  | OH  | . TYR TYR TYR A A 406 406 . | 0.0792 | 0.1025 | 0.0713 | -0.0016 | -0.0098 |   |
| 0.0031 | 1   | .   |                             |        |        |        |         |         |   |
| 3066   | CE2 | CE2 | . TYR TYR TYR A A 406 406 . | 0.0661 | 0.0370 | 0.0317 | 0.0210  | -0.0145 | - |
| 0.0085 | 1   | .   |                             |        |        |        |         |         |   |
| 3067   | CD2 | CD2 | . TYR TYR TYR A A 406 406 . | 0.0382 | 0.0469 | 0.0729 | -0.0076 | 0.0004  |   |
| 0.0075 | 1   | .   |                             |        |        |        |         |         |   |
| 3068   | C   | C   | . TYR TYR TYR A A 406 406 . | 0.0757 | 0.0794 | 0.0732 | -0.0027 | 0.0085  |   |
| 0.0028 | 1   | .   |                             |        |        |        |         |         |   |
| 3069   | O   | O   | . TYR TYR TYR A A 406 406 . | 0.0917 | 0.1040 | 0.0725 | 0.0188  | 0.0031  | - |
| 0.0257 | 1   | .   |                             |        |        |        |         |         |   |
| 3070   | N   | N   | . ASN ASN ASN A A 407 407 . | 0.0624 | 0.0978 | 0.0849 | 0.0127  | -0.0114 |   |
| 0.0014 | 1   | .   |                             |        |        |        |         |         |   |
| 3071   | CA  | CA  | . ASN ASN ASN A A 407 407 . | 0.0534 | 0.0928 | 0.0624 | 0.0114  | -0.0033 |   |
| 0.0087 | 1   | .   |                             |        |        |        |         |         |   |
| 3072   | CB  | CB  | . ASN ASN ASN A A 407 407 . | 0.0788 | 0.0913 | 0.0620 | 0.0080  | 0.0067  |   |
| 0.0170 | 1   | .   |                             |        |        |        |         |         |   |
| 3073   | CG  | CG  | . ASN ASN ASN A A 407 407 . | 0.0411 | 0.0655 | 0.0490 | -0.0005 | -0.0051 | - |
| 0.0077 | 1   | .   |                             |        |        |        |         |         |   |
| 3074   | OD1 | OD1 | . ASN ASN ASN A A 407 407 . | 0.1116 | 0.0779 | 0.0617 | 0.0045  | -0.0107 |   |
| 0.0030 | 1   | .   |                             |        |        |        |         |         |   |
| 3075   | ND2 | ND2 | . ASN ASN ASN A A 407 407 . | 0.0680 | 0.0880 | 0.0377 | 0.0100  | 0.0124  | - |
| 0.0006 | 1   | .   |                             |        |        |        |         |         |   |
| 3076   | C   | C   | . ASN ASN ASN A A 407 407 . | 0.0707 | 0.0741 | 0.0591 | 0.0066  | -0.0066 |   |
| 0.0040 | 1   | .   |                             |        |        |        |         |         |   |
| 3077   | O   | O   | . ASN ASN ASN A A 407 407 . | 0.0572 | 0.0710 | 0.0808 | -0.0007 | 0.0244  |   |
| 0.0098 | 1   | .   |                             |        |        |        |         |         |   |
| 3078   | N   | N   | . GLN GLN GLN A A 408 408 . | 0.0662 | 0.0827 | 0.0635 | 0.0031  | 0.0010  | - |
| 0.0079 | 1   | .   |                             |        |        |        |         |         |   |
| 3079   | CA  | CA  | . GLN GLN GLN A A 408 408 . | 0.1067 | 0.0729 | 0.0773 | -0.0058 | 0.0092  |   |
| 0.0010 | 1   | .   |                             |        |        |        |         |         |   |
| 3080   | CB  | CB  | . GLN GLN GLN A A 408 408 . | 0.0883 | 0.0795 | 0.0880 | 0.0057  | 0.0296  | - |
| 0.0060 | 1   | .   |                             |        |        |        |         |         |   |
| 3081   | CG  | CG  | . GLN GLN GLN A A 408 408 . | 0.1091 | 0.1006 | 0.1436 | -0.0274 | -0.0009 |   |
| 0.0372 | 1   | .   |                             |        |        |        |         |         |   |

|        |     |     |                             |        |        |        |         |         |   |
|--------|-----|-----|-----------------------------|--------|--------|--------|---------|---------|---|
| 3082   | CD  | CD  | . GLN GLN GLN A A 408 408 . | 0.1479 | 0.1597 | 0.1786 | -0.0310 | -0.0017 |   |
| 0.0246 | 1   | .   |                             |        |        |        |         |         |   |
| 3083   | OE1 | OE1 | . GLN GLN GLN A A 408 408 . | 0.1213 | 0.1229 | 0.1877 | -0.0499 | -0.0246 |   |
| 0.0094 | 1   | .   |                             |        |        |        |         |         |   |
| 3084   | NE2 | NE2 | . GLN GLN GLN A A 408 408 . | 0.1829 | 0.1607 | 0.1629 | -0.0382 | 0.0137  |   |
| 0.0520 | 1   | .   |                             |        |        |        |         |         |   |
| 3085   | C   | C   | . GLN GLN GLN A A 408 408 . | 0.0785 | 0.0945 | 0.0694 | 0.0056  | 0.0047  | - |
| 0.0068 | 1   | .   |                             |        |        |        |         |         |   |
| 3086   | O   | O   | . GLN GLN GLN A A 408 408 . | 0.0684 | 0.0936 | 0.1114 | -0.0036 | -0.0025 |   |
| 0.0173 | 1   | .   |                             |        |        |        |         |         |   |
| 3087   | N   | N   | . LEU LEU LEU A A 409 409 . | 0.0735 | 0.0850 | 0.0692 | -0.0125 | 0.0065  | - |
| 0.0039 | 1   | .   |                             |        |        |        |         |         |   |
| 3088   | CA  | CA  | . LEU LEU LEU A A 409 409 . | 0.0509 | 0.0841 | 0.0631 | 0.0047  | -0.0020 | - |
| 0.0141 | 1   | .   |                             |        |        |        |         |         |   |
| 3089   | CB  | CB  | . LEU LEU LEU A A 409 409 . | 0.0580 | 0.0612 | 0.0637 | -0.0153 | -0.0114 |   |
| 0.0058 | 1   | .   |                             |        |        |        |         |         |   |
| 3090   | CG  | CG  | . LEU LEU LEU A A 409 409 . | 0.0298 | 0.0760 | 0.0898 | 0.0119  | -0.0057 |   |
| 0.0181 | 1   | .   |                             |        |        |        |         |         |   |
| 3091   | CD1 | CD1 | . LEU LEU LEU A A 409 409 . | 0.0271 | 0.0805 | 0.1369 | -0.0004 | -0.0137 |   |
| 0.0236 | 1   | .   |                             |        |        |        |         |         |   |
| 3092   | CD2 | CD2 | . LEU LEU LEU A A 409 409 . | 0.0655 | 0.0501 | 0.1034 | 0.0174  | 0.0208  |   |
| 0.0085 | 1   | .   |                             |        |        |        |         |         |   |
| 3093   | C   | C   | . LEU LEU LEU A A 409 409 . | 0.0646 | 0.0684 | 0.0663 | 0.0125  | 0.0114  |   |
| 0.0079 | 1   | .   |                             |        |        |        |         |         |   |
| 3094   | O   | O   | . LEU LEU LEU A A 409 409 . | 0.0949 | 0.0889 | 0.0683 | -0.0010 | 0.0139  | - |
| 0.0177 | 1   | .   |                             |        |        |        |         |         |   |
| 3095   | N   | N   | . MET MET MET A A 410 410 . | 0.0577 | 0.0625 | 0.0502 | 0.0120  | 0.0045  | - |
| 0.0097 | 1   | .   |                             |        |        |        |         |         |   |
| 3096   | CA  | CA  | . MET MET MET A A 410 410 . | 0.0676 | 0.0717 | 0.1046 | 0.0110  | 0.0033  |   |
| 0.0077 | 1   | .   |                             |        |        |        |         |         |   |
| 3097   | CB  | CB  | . MET MET MET A A 410 410 . | 0.0770 | 0.0508 | 0.0986 | 0.0003  | -0.0084 |   |
| 0.0085 | 1   | .   |                             |        |        |        |         |         |   |
| 3098   | CG  | CG  | . MET MET MET A A 410 410 . | 0.1166 | 0.0858 | 0.0997 | -0.0240 | 0.0262  |   |
| 0.0089 | 1   | .   |                             |        |        |        |         |         |   |
| 3099   | SD  | SD  | . MET MET MET A A 410 410 . | 0.1460 | 0.1577 | 0.1349 | 0.0020  | 0.0075  |   |
| 0.0167 | 1   | .   |                             |        |        |        |         |         |   |
| 3100   | CE  | CE  | . MET MET MET A A 410 410 . | 0.1773 | 0.1560 | 0.0749 | -0.0443 | 0.0646  |   |
| 0.0092 | 1   | .   |                             |        |        |        |         |         |   |
| 3101   | C   | C   | . MET MET MET A A 410 410 . | 0.0873 | 0.0936 | 0.0964 | 0.0089  | 0.0042  | - |
| 0.0029 | 1   | .   |                             |        |        |        |         |         |   |
| 3102   | O   | O   | . MET MET MET A A 410 410 . | 0.0741 | 0.1423 | 0.1201 | 0.0142  | 0.0096  |   |
| 0.0025 | 1   | .   |                             |        |        |        |         |         |   |
| 3103   | N   | N   | . ARG ARG ARG A A 411 411 . | 0.0747 | 0.0951 | 0.0858 | -0.0036 | 0.0024  | - |
| 0.0090 | 1   | .   |                             |        |        |        |         |         |   |
| 3104   | CA  | CA  | . ARG ARG ARG A A 411 411 . | 0.0890 | 0.1048 | 0.0864 | 0.0056  | 0.0041  |   |
| 0.0049 | 1   | .   |                             |        |        |        |         |         |   |
| 3105   | CB  | CB  | . ARG ARG ARG A A 411 411 . | 0.0787 | 0.1169 | 0.0605 | -0.0035 | 0.0031  |   |
| 0.0121 | 1   | .   |                             |        |        |        |         |         |   |
| 3106   | CG  | CG  | . ARG ARG ARG A A 411 411 . | 0.1351 | 0.0755 | 0.0721 | -0.0040 | -0.0025 |   |
| 0.0216 | 1   | .   |                             |        |        |        |         |         |   |
| 3107   | CD  | CD  | . ARG ARG ARG A A 411 411 . | 0.1055 | 0.1150 | 0.0793 | -0.0342 | 0.0057  | - |
| 0.0076 | 1   | .   |                             |        |        |        |         |         |   |
| 3108   | NE  | NE  | . ARG ARG ARG A A 411 411 . | 0.1358 | 0.1769 | 0.1400 | 0.0022  | -0.0037 | - |
| 0.0020 | 1   | .   |                             |        |        |        |         |         |   |
| 3109   | CZ  | CZ  | . ARG ARG ARG A A 411 411 . | 0.1418 | 0.1151 | 0.1218 | 0.0448  | 0.0152  | - |
| 0.0351 | 1   | .   |                             |        |        |        |         |         |   |
| 3110   | NH1 | NH1 | . ARG ARG ARG A A 411 411 . | 0.0775 | 0.1718 | 0.1459 | 0.0575  | -0.0123 |   |
| 0.0181 | 1   | .   |                             |        |        |        |         |         |   |
| 3111   | NH2 | NH2 | . ARG ARG ARG A A 411 411 . | 0.1689 | 0.1261 | 0.1457 | 0.0258  | -0.0103 |   |
| 0.0002 | 1   | .   |                             |        |        |        |         |         |   |



|        |     |     |                             |        |        |        |         |         |   |
|--------|-----|-----|-----------------------------|--------|--------|--------|---------|---------|---|
| 3112   | C   | C   | . ARG ARG ARG A A 411 411 . | 0.1044 | 0.1158 | 0.0944 | 0.0054  | 0.0050  |   |
| 0.0027 | 1   | .   |                             |        |        |        |         |         |   |
| 3113   | O   | O   | . ARG ARG ARG A A 411 411 . | 0.1281 | 0.1504 | 0.1096 | 0.0067  | 0.0067  |   |
| 0.0177 | 1   | .   |                             |        |        |        |         |         |   |
| 3114   | N   | N   | . ILE ILE ILE A A 412 412 . | 0.0854 | 0.0989 | 0.0880 | 0.0189  | 0.0187  |   |
| 0.0208 | 1   | .   |                             |        |        |        |         |         |   |
| 3115   | CA  | CA  | . ILE ILE ILE A A 412 412 . | 0.1038 | 0.1196 | 0.0878 | 0.0241  | 0.0088  |   |
| 0.0081 | 1   | .   |                             |        |        |        |         |         |   |
| 3116   | CB  | CB  | . ILE ILE ILE A A 412 412 . | 0.0862 | 0.0780 | 0.0816 | 0.0174  | 0.0126  |   |
| 0.0073 | 1   | .   |                             |        |        |        |         |         |   |
| 3117   | CG1 | CG1 | . ILE ILE ILE A A 412 412 . | 0.0830 | 0.1003 | 0.1120 | 0.0131  | 0.0044  | - |
| 0.0127 | 1   | .   |                             |        |        |        |         |         |   |
| 3118   | CD1 | CD1 | . ILE ILE ILE A A 412 412 . | 0.0414 | 0.0983 | 0.1299 | 0.0200  | 0.0187  | - |
| 0.0030 | 1   | .   |                             |        |        |        |         |         |   |
| 3119   | CG2 | CG2 | . ILE ILE ILE A A 412 412 . | 0.0851 | 0.1457 | 0.0984 | 0.0032  | -0.0093 |   |
| 0.0169 | 1   | .   |                             |        |        |        |         |         |   |
| 3120   | C   | C   | . ILE ILE ILE A A 412 412 . | 0.1084 | 0.1013 | 0.1043 | 0.0140  | 0.0103  |   |
| 0.0157 | 1   | .   |                             |        |        |        |         |         |   |
| 3121   | O   | O   | . ILE ILE ILE A A 412 412 . | 0.1281 | 0.1415 | 0.1173 | 0.0022  | 0.0335  | - |
| 0.0103 | 1   | .   |                             |        |        |        |         |         |   |
| 3122   | N   | N   | . GLU GLU GLU A A 413 413 . | 0.0879 | 0.1055 | 0.0840 | 0.0091  | 0.0041  | - |
| 0.0083 | 1   | .   |                             |        |        |        |         |         |   |
| 3123   | CA  | CA  | . GLU GLU GLU A A 413 413 . | 0.0918 | 0.1245 | 0.1046 | 0.0041  | -0.0015 | - |
| 0.0010 | 1   | .   |                             |        |        |        |         |         |   |
| 3124   | CB  | CB  | . GLU GLU GLU A A 413 413 . | 0.1134 | 0.1114 | 0.1005 | 0.0024  | -0.0150 |   |
| 0.0024 | 1   | .   |                             |        |        |        |         |         |   |
| 3125   | CG  | CG  | . GLU GLU GLU A A 413 413 . | 0.1171 | 0.0918 | 0.1264 | -0.0086 | 0.0197  | - |
| 0.0116 | 1   | .   |                             |        |        |        |         |         |   |
| 3126   | CD  | CD  | . GLU GLU GLU A A 413 413 . | 0.1312 | 0.1867 | 0.1656 | 0.0175  | 0.0266  | - |
| 0.0101 | 1   | .   |                             |        |        |        |         |         |   |
| 3127   | OE1 | OE1 | . GLU GLU GLU A A 413 413 . | 0.1277 | 0.1606 | 0.2318 | -0.0149 | 0.0204  |   |
| 0.0156 | 1   | .   |                             |        |        |        |         |         |   |
| 3128   | OE2 | OE2 | . GLU GLU GLU A A 413 413 . | 0.1592 | 0.1789 | 0.1553 | 0.0286  | 0.0241  | - |
| 0.0007 | 1   | .   |                             |        |        |        |         |         |   |
| 3129   | C   | C   | . GLU GLU GLU A A 413 413 . | 0.1319 | 0.1495 | 0.1186 | 0.0320  | 0.0046  | - |
| 0.0027 | 1   | .   |                             |        |        |        |         |         |   |
| 3130   | O   | O   | . GLU GLU GLU A A 413 413 . | 0.1257 | 0.1923 | 0.0923 | 0.0121  | 0.0030  |   |
| 0.0297 | 1   | .   |                             |        |        |        |         |         |   |
| 3131   | N   | N   | . GLU GLU GLU A A 414 414 . | 0.1193 | 0.1717 | 0.1200 | 0.0386  | -0.0049 | - |
| 0.0019 | 1   | .   |                             |        |        |        |         |         |   |
| 3132   | CA  | CA  | . GLU GLU GLU A A 414 414 . | 0.1549 | 0.2175 | 0.1400 | 0.0479  | -0.0036 |   |
| 0.0000 | 1   | .   |                             |        |        |        |         |         |   |
| 3133   | CB  | CB  | . GLU GLU GLU A A 414 414 . | 0.1847 | 0.2282 | 0.1383 | 0.0687  | -0.0303 | - |
| 0.0116 | 1   | .   |                             |        |        |        |         |         |   |
| 3134   | CG  | CG  | . GLU GLU GLU A A 414 414 . | 0.2921 | 0.3156 | 0.2070 | 0.0615  | -0.0058 | - |
| 0.0059 | 1   | .   |                             |        |        |        |         |         |   |
| 3135   | CD  | CD  | . GLU GLU GLU A A 414 414 . | 0.3387 | 0.3319 | 0.2098 | 0.0333  | -0.0347 | - |
| 0.0010 | 1   | .   |                             |        |        |        |         |         |   |
| 3136   | OE1 | OE1 | . GLU GLU GLU A A 414 414 . | 0.4237 | 0.4165 | 0.2984 | 0.0335  | 0.0098  | - |
| 0.0301 | 1   | .   |                             |        |        |        |         |         |   |
| 3137   | OE2 | OE2 | . GLU GLU GLU A A 414 414 . | 0.3510 | 0.4076 | 0.2883 | 0.0683  | 0.0023  | - |
| 0.0692 | 1   | .   |                             |        |        |        |         |         |   |
| 3138   | C   | C   | . GLU GLU GLU A A 414 414 . | 0.1510 | 0.2193 | 0.1519 | 0.0388  | -0.0081 | - |
| 0.0100 | 1   | .   |                             |        |        |        |         |         |   |
| 3139   | O   | O   | . GLU GLU GLU A A 414 414 . | 0.1380 | 0.2835 | 0.1735 | 0.0495  | 0.0089  | - |
| 0.0107 | 1   | .   |                             |        |        |        |         |         |   |
| 3140   | N   | N   | . GLU GLU GLU A A 415 415 . | 0.1427 | 0.2091 | 0.1458 | -0.0041 | -0.0075 | - |
| 0.0107 | 1   | .   |                             |        |        |        |         |         |   |
| 3141   | CA  | CA  | . GLU GLU GLU A A 415 415 . | 0.1718 | 0.2370 | 0.1580 | -0.0166 | 0.0089  |   |
| 0.0035 | 1   | .   |                             |        |        |        |         |         |   |



|        |     |     |                             |        |        |        |         |         |   |
|--------|-----|-----|-----------------------------|--------|--------|--------|---------|---------|---|
| 3172   | OE2 | OE2 | . GLU GLU GLU A A 419 419 . | 0.5220 | 0.5433 | 0.5660 | -0.0894 | -0.0299 |   |
| 0.0295 | 1   | .   |                             |        |        |        |         |         |   |
| 3173   | C   | C   | . GLU GLU GLU A A 419 419 . | 0.2607 | 0.3159 | 0.2890 | -0.0045 | 0.0096  |   |
| 0.0244 | 1   | .   |                             |        |        |        |         |         |   |
| 3174   | O   | O   | . GLU GLU GLU A A 419 419 . | 0.2295 | 0.3362 | 0.3225 | -0.0113 | 0.0184  |   |
| 0.0421 | 1   | .   |                             |        |        |        |         |         |   |
| 3175   | N   | N   | . ALA ALA ALA A A 420 420 . | 0.2172 | 0.2611 | 0.2479 | -0.0068 | 0.0240  |   |
| 0.0159 | 1   | .   |                             |        |        |        |         |         |   |
| 3176   | CA  | CA  | . ALA ALA ALA A A 420 420 . | 0.2083 | 0.2258 | 0.2276 | -0.0017 | 0.0075  |   |
| 0.0123 | 1   | .   |                             |        |        |        |         |         |   |
| 3177   | CB  | CB  | . ALA ALA ALA A A 420 420 . | 0.1952 | 0.2058 | 0.2027 | 0.0126  | 0.0279  |   |
| 0.0198 | 1   | .   |                             |        |        |        |         |         |   |
| 3178   | C   | C   | . ALA ALA ALA A A 420 420 . | 0.2132 | 0.2370 | 0.2347 | 0.0110  | 0.0029  | - |
| 0.0055 | 1   | .   |                             |        |        |        |         |         |   |
| 3179   | O   | O   | . ALA ALA ALA A A 420 420 . | 0.2182 | 0.2445 | 0.2262 | 0.0117  | 0.0011  | - |
| 0.0097 | 1   | .   |                             |        |        |        |         |         |   |
| 3180   | N   | N   | . ARG ARG ARG A A 421 421 . | 0.1916 | 0.2199 | 0.2118 | 0.0000  | 0.0156  | - |
| 0.0027 | 1   | .   |                             |        |        |        |         |         |   |
| 3181   | CA  | CA  | . ARG ARG ARG A A 421 421 . | 0.1759 | 0.2232 | 0.1958 | -0.0118 | 0.0382  | - |
| 0.0097 | 1   | .   |                             |        |        |        |         |         |   |
| 3182   | CB  | CB  | . ARG ARG ARG A A 421 421 . | 0.2054 | 0.2163 | 0.2108 | 0.0005  | 0.0535  | - |
| 0.0219 | 1   | .   |                             |        |        |        |         |         |   |
| 3183   | CG  | CG  | . ARG ARG ARG A A 421 421 . | 0.2251 | 0.3037 | 0.2777 | 0.0074  | 0.0425  | - |
| 0.0202 | 1   | .   |                             |        |        |        |         |         |   |
| 3184   | CD  | CD  | . ARG ARG ARG A A 421 421 . | 0.2828 | 0.2924 | 0.2955 | 0.0469  | 0.0217  | - |
| 0.0177 | 1   | .   |                             |        |        |        |         |         |   |
| 3185   | NE  | NE  | . ARG ARG ARG A A 421 421 . | 0.3484 | 0.3972 | 0.2744 | 0.0174  | 0.0307  | - |
| 0.0001 | 1   | .   |                             |        |        |        |         |         |   |
| 3186   | CZ  | CZ  | . ARG ARG ARG A A 421 421 . | 0.3681 | 0.5175 | 0.3596 | 0.0332  | 0.0427  | - |
| 0.0104 | 1   | .   |                             |        |        |        |         |         |   |
| 3187   | NH1 | NH1 | . ARG ARG ARG A A 421 421 . | 0.3841 | 0.4755 | 0.3509 | 0.0183  | 0.0043  | - |
| 0.0782 | 1   | .   |                             |        |        |        |         |         |   |
| 3188   | NH2 | NH2 | . ARG ARG ARG A A 421 421 . | 0.3762 | 0.5772 | 0.3755 | 0.0368  | 0.0624  | - |
| 0.0017 | 1   | .   |                             |        |        |        |         |         |   |
| 3189   | C   | C   | . ARG ARG ARG A A 421 421 . | 0.1535 | 0.1975 | 0.1897 | -0.0086 | 0.0409  | - |
| 0.0251 | 1   | .   |                             |        |        |        |         |         |   |
| 3190   | O   | O   | . ARG ARG ARG A A 421 421 . | 0.1653 | 0.2457 | 0.2496 | -0.0370 | 0.0910  | - |
| 0.0312 | 1   | .   |                             |        |        |        |         |         |   |
| 3191   | N   | N   | . PHE PHE PHE A A 422 422 . | 0.1272 | 0.1628 | 0.1246 | -0.0117 | 0.0351  | - |
| 0.0139 | 1   | .   |                             |        |        |        |         |         |   |
| 3192   | CA  | CA  | . PHE PHE PHE A A 422 422 . | 0.1115 | 0.1475 | 0.1370 | 0.0146  | 0.0057  | - |
| 0.0031 | 1   | .   |                             |        |        |        |         |         |   |
| 3193   | CB  | CB  | . PHE PHE PHE A A 422 422 . | 0.1368 | 0.1789 | 0.1535 | -0.0094 | 0.0275  | - |
| 0.0210 | 1   | .   |                             |        |        |        |         |         |   |
| 3194   | CG  | CG  | . PHE PHE PHE A A 422 422 . | 0.1212 | 0.1453 | 0.1414 | 0.0105  | 0.0041  | - |
| 0.0003 | 1   | .   |                             |        |        |        |         |         |   |
| 3195   | CD1 | CD1 | . PHE PHE PHE A A 422 422 . | 0.1218 | 0.1492 | 0.1258 | 0.0215  | 0.0017  | - |
| 0.0089 | 1   | .   |                             |        |        |        |         |         |   |
| 3196   | CE1 | CE1 | . PHE PHE PHE A A 422 422 . | 0.1224 | 0.0855 | 0.0739 | 0.0026  | 0.0088  | - |
| 0.0022 | 1   | .   |                             |        |        |        |         |         |   |
| 3197   | CZ  | CZ  | . PHE PHE PHE A A 422 422 . | 0.1026 | 0.1360 | 0.1255 | 0.0119  | 0.0025  | - |
| 0.0208 | 1   | .   |                             |        |        |        |         |         |   |
| 3198   | CE2 | CE2 | . PHE PHE PHE A A 422 422 . | 0.1242 | 0.1423 | 0.0876 | 0.0038  | 0.0259  | - |
| 0.0111 | 1   | .   |                             |        |        |        |         |         |   |
| 3199   | CD2 | CD2 | . PHE PHE PHE A A 422 422 . | 0.0773 | 0.0814 | 0.0911 | 0.0006  | 0.0113  | - |
| 0.0050 | 1   | .   |                             |        |        |        |         |         |   |
| 3200   | C   | C   | . PHE PHE PHE A A 422 422 . | 0.1113 | 0.1544 | 0.1148 | 0.0120  | 0.0011  | - |
| 0.0223 | 1   | .   |                             |        |        |        |         |         |   |
| 3201   | O   | O   | . PHE PHE PHE A A 422 422 . | 0.1142 | 0.1546 | 0.1434 | 0.0171  | 0.0075  | - |
| 0.0476 | 1   | .   |                             |        |        |        |         |         |   |

|        |     |     |                             |        |        |        |         |         |   |
|--------|-----|-----|-----------------------------|--------|--------|--------|---------|---------|---|
| 3202   | N   | N   | . ALA ALA ALA A A 423 423 . | 0.1116 | 0.1104 | 0.1244 | 0.0115  | -0.0181 | - |
| 0.0021 | 1   | .   |                             |        |        |        |         |         |   |
| 3203   | CA  | CA  | . ALA ALA ALA A A 423 423 . | 0.1139 | 0.1183 | 0.1140 | 0.0052  | -0.0185 | - |
| 0.0117 | 1   | .   |                             |        |        |        |         |         |   |
| 3204   | CB  | CB  | . ALA ALA ALA A A 423 423 . | 0.0972 | 0.1388 | 0.1310 | 0.0236  | 0.0095  | - |
| 0.0279 | 1   | .   |                             |        |        |        |         |         |   |
| 3205   | C   | C   | . ALA ALA ALA A A 423 423 . | 0.1349 | 0.1313 | 0.1229 | -0.0065 | -0.0093 | - |
| 0.0036 | 1   | .   |                             |        |        |        |         |         |   |
| 3206   | O   | O   | . ALA ALA ALA A A 423 423 . | 0.1105 | 0.1089 | 0.0773 | 0.0046  | -0.0317 | - |
| 0.0151 | 1   | .   |                             |        |        |        |         |         |   |
| 3207   | N   | N   | . GLY GLY GLY A A 424 424 . | 0.1098 | 0.0883 | 0.1070 | -0.0085 | -0.0091 | - |
| 0.0086 | 1   | .   |                             |        |        |        |         |         |   |
| 3208   | CA  | CA  | . GLY GLY GLY A A 424 424 . | 0.1339 | 0.1136 | 0.1036 | 0.0004  | -0.0205 | - |
| 0.0003 | 1   | .   |                             |        |        |        |         |         |   |
| 3209   | C   | C   | . GLY GLY GLY A A 424 424 . | 0.1243 | 0.1193 | 0.0971 | -0.0074 | -0.0060 | - |
| 0.0074 | 1   | .   |                             |        |        |        |         |         |   |
| 3210   | O   | O   | . GLY GLY GLY A A 424 424 . | 0.1085 | 0.1181 | 0.1024 | 0.0235  | -0.0098 | - |
| 0.0132 | 1   | .   |                             |        |        |        |         |         |   |
| 3211   | N   | N   | . HIS HIS HIS A A 425 425 . | 0.1216 | 0.1004 | 0.0921 | -0.0169 | -0.0016 | - |
| 0.0181 | 1   | .   |                             |        |        |        |         |         |   |
| 3212   | CA  | CA  | . HIS HIS HIS A A 425 425 . | 0.1338 | 0.0919 | 0.0861 | -0.0087 | -0.0195 | - |
| 0.0116 | 1   | .   |                             |        |        |        |         |         |   |
| 3213   | CB  | CB  | . HIS HIS HIS A A 425 425 . | 0.1611 | 0.0917 | 0.1096 | -0.0015 | -0.0134 | - |
| 0.0178 | 1   | .   |                             |        |        |        |         |         |   |
| 3214   | CG  | CG  | . HIS HIS HIS A A 425 425 . | 0.1313 | 0.1055 | 0.1419 | -0.0157 | -0.0270 | - |
| 0.0233 | 1   | .   |                             |        |        |        |         |         |   |
| 3215   | ND1 | ND1 | . HIS HIS HIS A A 425 425 . | 0.2414 | 0.1772 | 0.1643 | 0.0036  | 0.0017  | - |
| 0.0083 | 1   | .   |                             |        |        |        |         |         |   |
| 3216   | CE1 | CE1 | . HIS HIS HIS A A 425 425 . | 0.2136 | 0.1644 | 0.1257 | -0.0030 | -0.0314 | - |
| 0.0249 | 1   | .   |                             |        |        |        |         |         |   |
| 3217   | NE2 | NE2 | . HIS HIS HIS A A 425 425 . | 0.2512 | 0.1494 | 0.1582 | -0.0142 | -0.0017 | - |
| 0.0423 | 1   | .   |                             |        |        |        |         |         |   |
| 3218   | CD2 | CD2 | . HIS HIS HIS A A 425 425 . | 0.2070 | 0.1362 | 0.1321 | -0.0157 | -0.0413 | - |
| 0.0264 | 1   | .   |                             |        |        |        |         |         |   |
| 3219   | C   | C   | . HIS HIS HIS A A 425 425 . | 0.1217 | 0.0846 | 0.0993 | 0.0048  | -0.0120 | - |
| 0.0037 | 1   | .   |                             |        |        |        |         |         |   |
| 3220   | O   | O   | . HIS HIS HIS A A 425 425 . | 0.1363 | 0.1401 | 0.1447 | -0.0148 | -0.0311 | - |
| 0.0343 | 1   | .   |                             |        |        |        |         |         |   |
| 3221   | N   | N   | . ASN ASN ASN A A 426 426 . | 0.1141 | 0.1046 | 0.0736 | 0.0044  | 0.0117  | - |
| 0.0006 | 1   | .   |                             |        |        |        |         |         |   |
| 3222   | CA  | CA  | . ASN ASN ASN A A 426 426 . | 0.1303 | 0.0902 | 0.0907 | -0.0072 | 0.0143  | - |
| 0.0189 | 1   | .   |                             |        |        |        |         |         |   |
| 3223   | CB  | CB  | . ASN ASN ASN A A 426 426 . | 0.1268 | 0.1041 | 0.0790 | 0.0075  | 0.0105  | - |
| 0.0222 | 1   | .   |                             |        |        |        |         |         |   |
| 3224   | CG  | CG  | . ASN ASN ASN A A 426 426 . | 0.1490 | 0.1360 | 0.1183 | 0.0108  | -0.0139 | - |
| 0.0233 | 1   | .   |                             |        |        |        |         |         |   |
| 3225   | OD1 | OD1 | . ASN ASN ASN A A 426 426 . | 0.2751 | 0.3011 | 0.1432 | -0.0174 | -0.0385 | - |
| 0.0355 | 1   | .   |                             |        |        |        |         |         |   |
| 3226   | ND2 | ND2 | . ASN ASN ASN A A 426 426 . | 0.1155 | 0.1003 | 0.0789 | -0.0207 | -0.0003 | - |
| 0.0105 | 1   | .   |                             |        |        |        |         |         |   |
| 3227   | C   | C   | . ASN ASN ASN A A 426 426 . | 0.1524 | 0.1128 | 0.1025 | -0.0175 | 0.0129  | - |
| 0.0186 | 1   | .   |                             |        |        |        |         |         |   |
| 3228   | O   | O   | . ASN ASN ASN A A 426 426 . | 0.1936 | 0.1410 | 0.1379 | -0.0109 | 0.0195  | - |
| 0.0089 | 1   | .   |                             |        |        |        |         |         |   |
| 3229   | N   | N   | . PHE PHE PHE A A 427 427 . | 0.1437 | 0.1137 | 0.1048 | -0.0276 | 0.0168  | - |
| 0.0175 | 1   | .   |                             |        |        |        |         |         |   |
| 3230   | CA  | CA  | . PHE PHE PHE A A 427 427 . | 0.1598 | 0.1279 | 0.1202 | -0.0106 | 0.0148  | - |
| 0.0184 | 1   | .   |                             |        |        |        |         |         |   |
| 3231   | CB  | CB  | . PHE PHE PHE A A 427 427 . | 0.1714 | 0.1406 | 0.1173 | -0.0219 | 0.0081  | - |
| 0.0205 | 1   | .   |                             |        |        |        |         |         |   |





|        |     |     |                     |           |                                |           |
|--------|-----|-----|---------------------|-----------|--------------------------------|-----------|
| 3292   | O3P | O3P | . 2PG 2PG 2PG A     | . 601 601 | . 0.0849 0.1196 0.1131 0.0033  | -0.0330   |
| 0.0241 | 1   | .   |                     |           |                                |           |
| 3293   | O1P | O1P | . 2PG 2PG 2PG A     | . 601 601 | . 0.0988 0.1009 0.1143 0.0005  | -0.0121 - |
| 0.0303 | 1   | .   |                     |           |                                |           |
| 3294   | C2  | C2  | . 2PG 2PG 2PG A     | . 601 601 | . 0.0888 0.0831 0.0896 0.0199  | -0.0125   |
| 0.0182 | 1   | .   |                     |           |                                |           |
| 3295   | C1  | C1  | . 2PG 2PG 2PG A     | . 601 601 | . 0.1351 0.1572 0.1164 0.0240  | -0.0044 - |
| 0.0141 | 1   | .   |                     |           |                                |           |
| 3296   | O2  | O2  | . 2PG 2PG 2PG A     | . 601 601 | . 0.0652 0.0998 0.1003 0.0152  | -0.0056   |
| 0.0023 | 1   | .   |                     |           |                                |           |
| 3297   | O1  | O1  | . 2PG 2PG 2PG A     | . 601 601 | . 0.1176 0.1081 0.1555 0.0377  | 0.0125 -  |
| 0.0112 | 1   | .   |                     |           |                                |           |
| 3298   | C3  | C3  | . 2PG 2PG 2PG A     | . 601 601 | . 0.1058 0.1389 0.1727 0.0030  | -0.0467   |
| 0.0088 | 1   | .   |                     |           |                                |           |
| 3299   | O3  | O3  | . 2PG 2PG 2PG A     | . 601 601 | . 0.1611 0.2384 0.1940 -0.0058 | -0.0337   |
| 0.0375 | 1   | .   |                     |           |                                |           |
| 3300   | O   | O   | . HOH HOH HOH A     | . 800 800 | . 0.0398 0.0934 0.0664 0.0284  | -0.0123 - |
| 0.0048 | 1   | .   |                     |           |                                |           |
| 3301   | O   | O   | . HOH HOH HOH A     | . 801 801 | . 0.0761 0.1069 0.0945 0.0000  | -0.0260   |
| 0.0089 | 1   | .   |                     |           |                                |           |
| 3302   | O   | O   | . HOH HOH HOH A     | . 802 802 | . 0.0816 0.1168 0.1106 0.0082  | -0.0003 - |
| 0.0098 | 1   | .   |                     |           |                                |           |
| 3303   | O3  | O3  | . TRS TRS TRS A     | . 700 700 | . 0.2921 0.3968 0.2719 0.0222  | 0.0213 -  |
| 0.0331 | 1   | .   |                     |           |                                |           |
| 3304   | C3  | C3  | . TRS TRS TRS A     | . 700 700 | . 0.2191 0.2934 0.2353 0.0361  | 0.0023 -  |
| 0.0137 | 1   | .   |                     |           |                                |           |
| 3305   | C   | C   | . TRS TRS TRS A     | . 700 700 | . 0.2093 0.2366 0.2286 0.0245  | 0.0020 -  |
| 0.0069 | 1   | .   |                     |           |                                |           |
| 3306   | N   | N   | . TRS TRS TRS A     | . 700 700 | . 0.1714 0.1706 0.1951 0.0307  | 0.0238 -  |
| 0.0028 | 1   | .   |                     |           |                                |           |
| 3307   | C2  | C2  | . TRS TRS TRS A     | . 700 700 | . 0.2263 0.2438 0.2228 0.0267  | -0.0081 - |
| 0.0072 | 1   | .   |                     |           |                                |           |
| 3308   | O2  | O2  | . TRS TRS TRS A     | . 700 700 | . 0.2632 0.2881 0.2629 0.0234  | -0.0278 - |
| 0.0698 | 1   | .   |                     |           |                                |           |
| 3309   | C1  | C1  | . TRS TRS TRS A     | . 700 700 | . 0.1755 0.2139 0.1930 0.0413  | 0.0017    |
| 0.0027 | 1   | .   |                     |           |                                |           |
| 3310   | O1  | O1  | . TRS TRS TRS A     | . 700 700 | . 0.1707 0.1598 0.2168 0.0565  | 0.0273    |
| 0.0332 | 1   | .   |                     |           |                                |           |
| 3311   | N   | N   | . SER SER SER B B 1 | 1         | . 0.2236 0.2884 0.3089 0.0091  | -0.0425   |
| 0.0159 | 1   | .   |                     |           |                                |           |
| 3312   | CA  | CA  | . SER SER SER B B 1 | 1         | . 0.2470 0.3050 0.3213 0.0110  | -0.0315   |
| 0.0096 | 1   | .   |                     |           |                                |           |
| 3313   | CB  | CB  | . SER SER SER B B 1 | 1         | . 0.2768 0.3273 0.3142 0.0304  | -0.0197   |
| 0.0178 | 1   | .   |                     |           |                                |           |
| 3314   | OG  | OG  | . SER SER SER B B 1 | 1         | . 0.3043 0.3843 0.3636 -0.0087 | -0.0267   |
| 0.0566 | 1   | .   |                     |           |                                |           |
| 3315   | C   | C   | . SER SER SER B B 1 | 1         | . 0.2321 0.2844 0.3047 0.0030  | -0.0317   |
| 0.0081 | 1   | .   |                     |           |                                |           |
| 3316   | O   | O   | . SER SER SER B B 1 | 1         | . 0.2191 0.3080 0.3145 -0.0034 | -0.0213   |
| 0.0268 | 1   | .   |                     |           |                                |           |
| 3317   | N   | N   | . ILE ILE ILE B B 2 | 2         | . 0.2143 0.2681 0.2845 0.0141  | -0.0218   |
| 0.0044 | 1   | .   |                     |           |                                |           |
| 3318   | CA  | CA  | . ILE ILE ILE B B 2 | 2         | . 0.1825 0.2236 0.2399 0.0066  | -0.0167 - |
| 0.0161 | 1   | .   |                     |           |                                |           |
| 3319   | CB  | CB  | . ILE ILE ILE B B 2 | 2         | . 0.1676 0.2196 0.2276 0.0236  | -0.0004 - |
| 0.0052 | 1   | .   |                     |           |                                |           |
| 3320   | CG1 | CG1 | . ILE ILE ILE B B 2 | 2         | . 0.2294 0.2173 0.2202 0.0024  | -0.0222 - |
| 0.0184 | 1   | .   |                     |           |                                |           |
| 3321   | CD1 | CD1 | . ILE ILE ILE B B 2 | 2         | . 0.1863 0.1930 0.1914 0.0216  | -0.0458 - |
| 0.0369 | 1   | .   |                     |           |                                |           |





|        |     |     |                       |                                        |   |
|--------|-----|-----|-----------------------|----------------------------------------|---|
| 3352   | CA  | CA  | . TRP TRP TRP B B 6 6 | . 0.0912 0.1283 0.1284 0.0011 0.0182   |   |
| 0.0121 | 1 . |     |                       |                                        |   |
| 3353   | CB  | CB  | . TRP TRP TRP B B 6 6 | . 0.1314 0.1607 0.1448 -0.0004 0.0220  | - |
| 0.0106 | 1 . |     |                       |                                        |   |
| 3354   | CG  | CG  | . TRP TRP TRP B B 6 6 | . 0.1503 0.2033 0.1686 -0.0189 0.0145  |   |
| 0.0082 | 1 . |     |                       |                                        |   |
| 3355   | CD1 | CD1 | . TRP TRP TRP B B 6 6 | . 0.1991 0.1998 0.2554 -0.0024 0.0100  |   |
| 0.0262 | 1 . |     |                       |                                        |   |
| 3356   | NE1 | NE1 | . TRP TRP TRP B B 6 6 | . 0.2190 0.2799 0.2222 -0.0182 0.0276  |   |
| 0.0063 | 1 . |     |                       |                                        |   |
| 3357   | CE2 | CE2 | . TRP TRP TRP B B 6 6 | . 0.2415 0.2028 0.2138 -0.0355 0.0105  |   |
| 0.0112 | 1 . |     |                       |                                        |   |
| 3358   | CD2 | CD2 | . TRP TRP TRP B B 6 6 | . 0.1935 0.1666 0.1805 0.0099 0.0102   |   |
| 0.0116 | 1 . |     |                       |                                        |   |
| 3359   | CE3 | CE3 | . TRP TRP TRP B B 6 6 | . 0.1796 0.1970 0.1917 0.0022 0.0416   |   |
| 0.0076 | 1 . |     |                       |                                        |   |
| 3360   | CZ3 | CZ3 | . TRP TRP TRP B B 6 6 | . 0.2151 0.2690 0.1828 -0.0132 0.0116  | - |
| 0.0009 | 1 . |     |                       |                                        |   |
| 3361   | CH2 | CH2 | . TRP TRP TRP B B 6 6 | . 0.2587 0.2980 0.2227 -0.0211 0.0037  | - |
| 0.0302 | 1 . |     |                       |                                        |   |
| 3362   | CZ2 | CZ2 | . TRP TRP TRP B B 6 6 | . 0.2944 0.2645 0.2068 -0.0217 0.0273  | - |
| 0.0046 | 1 . |     |                       |                                        |   |
| 3363   | C   | C   | . TRP TRP TRP B B 6 6 | . 0.0813 0.1323 0.1385 0.0090 0.0059   |   |
| 0.0009 | 1 . |     |                       |                                        |   |
| 3364   | O   | O   | . TRP TRP TRP B B 6 6 | . 0.1095 0.1607 0.1682 0.0155 0.0113   |   |
| 0.0058 | 1 . |     |                       |                                        |   |
| 3365   | N   | N   | . ALA ALA ALA B B 7 7 | . 0.0842 0.1211 0.1095 0.0106 0.0064   |   |
| 0.0160 | 1 . |     |                       |                                        |   |
| 3366   | CA  | CA  | . ALA ALA ALA B B 7 7 | . 0.0848 0.1238 0.1130 -0.0001 0.0019  |   |
| 0.0099 | 1 . |     |                       |                                        |   |
| 3367   | CB  | CB  | . ALA ALA ALA B B 7 7 | . 0.1404 0.1423 0.1315 0.0017 -0.0095  |   |
| 0.0107 | 1 . |     |                       |                                        |   |
| 3368   | C   | C   | . ALA ALA ALA B B 7 7 | . 0.1142 0.1409 0.1174 0.0114 0.0001   |   |
| 0.0038 | 1 . |     |                       |                                        |   |
| 3369   | O   | O   | . ALA ALA ALA B B 7 7 | . 0.1248 0.1608 0.1186 0.0215 0.0011   |   |
| 0.0220 | 1 . |     |                       |                                        |   |
| 3370   | N   | N   | . ARG ARG ARG B B 8 8 | . 0.0870 0.1245 0.1163 0.0104 -0.0032  |   |
| 0.0021 | 1 . |     |                       |                                        |   |
| 3371   | CA  | CA  | . ARG ARG ARG B B 8 8 | . 0.0923 0.1248 0.1133 0.0099 0.0030   |   |
| 0.0033 | 1 . |     |                       |                                        |   |
| 3372   | CB  | CB  | . ARG ARG ARG B B 8 8 | . 0.0919 0.1403 0.1360 0.0064 0.0042   |   |
| 0.0066 | 1 . |     |                       |                                        |   |
| 3373   | CG  | CG  | . ARG ARG ARG B B 8 8 | . 0.1240 0.1330 0.1327 0.0512 0.0063   |   |
| 0.0112 | 1 . |     |                       |                                        |   |
| 3374   | CD  | CD  | . ARG ARG ARG B B 8 8 | . 0.1623 0.1482 0.1419 -0.0007 -0.0064 |   |
| 0.0101 | 1 . |     |                       |                                        |   |
| 3375   | NE  | NE  | . ARG ARG ARG B B 8 8 | . 0.1513 0.1645 0.1466 0.0299 0.0100   |   |
| 0.0186 | 1 . |     |                       |                                        |   |
| 3376   | CZ  | CZ  | . ARG ARG ARG B B 8 8 | . 0.2155 0.1531 0.1765 0.0208 -0.0003  |   |
| 0.0436 | 1 . |     |                       |                                        |   |
| 3377   | NH1 | NH1 | . ARG ARG ARG B B 8 8 | . 0.1437 0.1404 0.1809 0.0375 -0.0157  | - |
| 0.0160 | 1 . |     |                       |                                        |   |
| 3378   | NH2 | NH2 | . ARG ARG ARG B B 8 8 | . 0.2488 0.2332 0.2397 0.0246 0.0388   |   |
| 0.0222 | 1 . |     |                       |                                        |   |
| 3379   | C   | C   | . ARG ARG ARG B B 8 8 | . 0.0921 0.1049 0.0932 0.0036 0.0031   |   |
| 0.0073 | 1 . |     |                       |                                        |   |
| 3380   | O   | O   | . ARG ARG ARG B B 8 8 | . 0.0817 0.1211 0.0938 0.0131 0.0117   | - |
| 0.0052 | 1 . |     |                       |                                        |   |
| 3381   | N   | N   | . GLU GLU GLU B B 9 9 | . 0.0953 0.1091 0.1081 -0.0065 0.0142  | - |
| 0.0001 | 1 . |     |                       |                                        |   |



|        |     |     |                         |                                          |
|--------|-----|-----|-------------------------|------------------------------------------|
| 3412   | C   | C   | . ASP ASP ASP B B 12 12 | . 0.0816 0.0957 0.0843 0.0049 0.0005 -   |
| 0.0017 | 1   | .   |                         |                                          |
| 3413   | O   | O   | . ASP ASP ASP B B 12 12 | . 0.0942 0.0760 0.0867 -0.0033 -0.0072 - |
| 0.0010 | 1   | .   |                         |                                          |
| 3414   | N   | N   | . SER SER SER B B 13 13 | . 0.0757 0.0961 0.0821 0.0032 0.0017 -   |
| 0.0006 | 1   | .   |                         |                                          |
| 3415   | CA  | CA  | . SER SER SER B B 13 13 | . 0.0800 0.0769 0.0795 0.0070 0.0005 -   |
| 0.0193 | 1   | .   |                         |                                          |
| 3416   | CB  | CB  | . SER SER SER B B 13 13 | . 0.1047 0.0896 0.0351 0.0076 0.0095 -   |
| 0.0225 | 1   | .   |                         |                                          |
| 3417   | OG  | OG  | . SER SER SER B B 13 13 | . 0.1052 0.0909 0.0942 0.0192 -0.0037    |
| 0.0070 | 1   | .   |                         |                                          |
| 3418   | C   | C   | . SER SER SER B B 13 13 | . 0.0931 0.0870 0.0652 0.0075 -0.0028 -  |
| 0.0103 | 1   | .   |                         |                                          |
| 3419   | O   | O   | . SER SER SER B B 13 13 | . 0.0717 0.0866 0.1073 0.0119 -0.0143 -  |
| 0.0121 | 1   | .   |                         |                                          |
| 3420   | N   | N   | . ARG ARG ARG B B 14 14 | . 0.0893 0.0896 0.0676 -0.0020 -0.0093   |
| 0.0048 | 1   | .   |                         |                                          |
| 3421   | CA  | CA  | . ARG ARG ARG B B 14 14 | . 0.1063 0.0833 0.0878 -0.0020 0.0002    |
| 0.0042 | 1   | .   |                         |                                          |
| 3422   | CB  | CB  | . ARG ARG ARG B B 14 14 | . 0.1106 0.0879 0.0904 -0.0205 0.0158    |
| 0.0104 | 1   | .   |                         |                                          |
| 3423   | CG  | CG  | . ARG ARG ARG B B 14 14 | . 0.1708 0.1224 0.1262 -0.0041 0.0183    |
| 0.0215 | 1   | .   |                         |                                          |
| 3424   | CD  | CD  | . ARG ARG ARG B B 14 14 | . 0.1802 0.1322 0.1761 0.0332 -0.0146    |
| 0.0287 | 1   | .   |                         |                                          |
| 3425   | NE  | NE  | . ARG ARG ARG B B 14 14 | . 0.1606 0.1347 0.1623 0.0058 -0.0243 -  |
| 0.0057 | 1   | .   |                         |                                          |
| 3426   | CZ  | CZ  | . ARG ARG ARG B B 14 14 | . 0.1496 0.1631 0.1507 0.0132 -0.0185    |
| 0.0282 | 1   | .   |                         |                                          |
| 3427   | NH1 | NH1 | . ARG ARG ARG B B 14 14 | . 0.1982 0.1090 0.1282 0.0102 -0.0044    |
| 0.0177 | 1   | .   |                         |                                          |
| 3428   | NH2 | NH2 | . ARG ARG ARG B B 14 14 | . 0.1724 0.1655 0.1565 -0.0077 -0.0646   |
| 0.0163 | 1   | .   |                         |                                          |
| 3429   | C   | C   | . ARG ARG ARG B B 14 14 | . 0.1114 0.0921 0.0973 0.0031 -0.0102    |
| 0.0125 | 1   | .   |                         |                                          |
| 3430   | O   | O   | . ARG ARG ARG B B 14 14 | . 0.1175 0.0938 0.1177 -0.0077 -0.0102   |
| 0.0095 | 1   | .   |                         |                                          |
| 3431   | N   | N   | . GLY GLY GLY B B 15 15 | . 0.0798 0.0750 0.0649 0.0130 -0.0076 -  |
| 0.0045 | 1   | .   |                         |                                          |
| 3432   | CA  | CA  | . GLY GLY GLY B B 15 15 | . 0.1018 0.0668 0.0759 0.0198 -0.0126    |
| 0.0058 | 1   | .   |                         |                                          |
| 3433   | C   | C   | . GLY GLY GLY B B 15 15 | . 0.0985 0.1123 0.1035 -0.0063 0.0058 -  |
| 0.0033 | 1   | .   |                         |                                          |
| 3434   | O   | O   | . GLY GLY GLY B B 15 15 | . 0.1165 0.1159 0.0946 -0.0068 0.0090 -  |
| 0.0304 | 1   | .   |                         |                                          |
| 3435   | N   | N   | . ASN ASN ASN B B 16 16 | . 0.1030 0.1064 0.1069 0.0118 -0.0054    |
| 0.0031 | 1   | .   |                         |                                          |
| 3436   | CA  | CA  | . ASN ASN ASN B B 16 16 | . 0.0898 0.0983 0.1042 0.0081 0.0056 -   |
| 0.0001 | 1   | .   |                         |                                          |
| 3437   | CB  | CB  | . ASN ASN ASN B B 16 16 | . 0.0635 0.1017 0.1068 -0.0082 0.0171    |
| 0.0106 | 1   | .   |                         |                                          |
| 3438   | CG  | CG  | . ASN ASN ASN B B 16 16 | . 0.0890 0.1153 0.1144 -0.0365 -0.0020 - |
| 0.0129 | 1   | .   |                         |                                          |
| 3439   | OD1 | OD1 | . ASN ASN ASN B B 16 16 | . 0.1506 0.0978 0.1773 -0.0213 -0.0151 - |
| 0.0081 | 1   | .   |                         |                                          |
| 3440   | ND2 | ND2 | . ASN ASN ASN B B 16 16 | . 0.1643 0.1239 0.1366 -0.0010 0.0033    |
| 0.0289 | 1   | .   |                         |                                          |
| 3441   | C   | C   | . ASN ASN ASN B B 16 16 | . 0.0740 0.0951 0.0808 0.0005 -0.0017 -  |
| 0.0103 | 1   | .   |                         |                                          |

|        |     |     |                           |        |        |        |         |         |   |
|--------|-----|-----|---------------------------|--------|--------|--------|---------|---------|---|
| 3442   | O   | O   | . ASN ASN ASN B B 16 16 . | 0.1065 | 0.0729 | 0.0978 | 0.0153  | 0.0028  | - |
| 0.0199 | 1   | .   |                           |        |        |        |         |         |   |
| 3443   | N   | N   | . PRO PRO PRO B B 17 17 . | 0.0793 | 0.0820 | 0.0891 | -0.0014 | -0.0108 | - |
| 0.0151 | 1   | .   |                           |        |        |        |         |         |   |
| 3444   | CA  | CA  | . PRO PRO PRO B B 17 17 . | 0.0594 | 0.0735 | 0.0784 | 0.0006  | 0.0058  | - |
| 0.0170 | 1   | .   |                           |        |        |        |         |         |   |
| 3445   | CB  | CB  | . PRO PRO PRO B B 17 17 . | 0.0683 | 0.0636 | 0.0684 | 0.0067  | -0.0138 | - |
| 0.0196 | 1   | .   |                           |        |        |        |         |         |   |
| 3446   | CG  | CG  | . PRO PRO PRO B B 17 17 . | 0.0610 | 0.1019 | 0.0872 | -0.0074 | 0.0014  | - |
| 0.0088 | 1   | .   |                           |        |        |        |         |         |   |
| 3447   | CD  | CD  | . PRO PRO PRO B B 17 17 . | 0.1009 | 0.0886 | 0.0820 | 0.0077  | -0.0047 | - |
| 0.0387 | 1   | .   |                           |        |        |        |         |         |   |
| 3448   | C   | C   | . PRO PRO PRO B B 17 17 . | 0.0607 | 0.0787 | 0.0885 | 0.0069  | 0.0199  | - |
| 0.0021 | 1   | .   |                           |        |        |        |         |         |   |
| 3449   | O   | O   | . PRO PRO PRO B B 17 17 . | 0.0823 | 0.0915 | 0.0891 | 0.0213  | 0.0006  | - |
| 0.0034 | 1   | .   |                           |        |        |        |         |         |   |
| 3450   | N   | N   | . THR THR THR B B 18 18 . | 0.0875 | 0.0727 | 0.0837 | 0.0079  | -0.0063 | - |
| 0.0176 | 1   | .   |                           |        |        |        |         |         |   |
| 3451   | CA  | CA  | . THR THR THR B B 18 18 . | 0.0795 | 0.1032 | 0.0963 | 0.0148  | -0.0003 | - |
| 0.0053 | 1   | .   |                           |        |        |        |         |         |   |
| 3452   | CB  | CB  | . THR THR THR B B 18 18 . | 0.1075 | 0.0796 | 0.0719 | 0.0121  | -0.0201 | - |
| 0.0160 | 1   | .   |                           |        |        |        |         |         |   |
| 3453   | OG1 | OG1 | . THR THR THR B B 18 18 . | 0.0748 | 0.0963 | 0.0903 | 0.0259  | -0.0113 |   |
| 0.0112 | 1   | .   |                           |        |        |        |         |         |   |
| 3454   | CG2 | CG2 | . THR THR THR B B 18 18 . | 0.0771 | 0.0863 | 0.0908 | 0.0143  | 0.0097  | - |
| 0.0081 | 1   | .   |                           |        |        |        |         |         |   |
| 3455   | C   | C   | . THR THR THR B B 18 18 . | 0.0971 | 0.0909 | 0.1012 | 0.0029  | -0.0026 | - |
| 0.0020 | 1   | .   |                           |        |        |        |         |         |   |
| 3456   | O   | O   | . THR THR THR B B 18 18 . | 0.0827 | 0.1002 | 0.0999 | 0.0124  | 0.0037  | - |
| 0.0060 | 1   | .   |                           |        |        |        |         |         |   |
| 3457   | N   | N   | . VAL VAL VAL B B 19 19 . | 0.0658 | 0.0829 | 0.0618 | 0.0017  | -0.0124 |   |
| 0.0021 | 1   | .   |                           |        |        |        |         |         |   |
| 3458   | CA  | CA  | . VAL VAL VAL B B 19 19 . | 0.0703 | 0.0824 | 0.0991 | 0.0048  | 0.0125  |   |
| 0.0147 | 1   | .   |                           |        |        |        |         |         |   |
| 3459   | CB  | CB  | . VAL VAL VAL B B 19 19 . | 0.0599 | 0.0631 | 0.0776 | -0.0046 | 0.0001  |   |
| 0.0227 | 1   | .   |                           |        |        |        |         |         |   |
| 3460   | CG1 | CG1 | . VAL VAL VAL B B 19 19 . | 0.0657 | 0.1239 | 0.1277 | 0.0071  | -0.0151 |   |
| 0.0295 | 1   | .   |                           |        |        |        |         |         |   |
| 3461   | CG2 | CG2 | . VAL VAL VAL B B 19 19 . | 0.0871 | 0.0905 | 0.1613 | 0.0324  | 0.0217  |   |
| 0.0167 | 1   | .   |                           |        |        |        |         |         |   |
| 3462   | C   | C   | . VAL VAL VAL B B 19 19 . | 0.0948 | 0.1133 | 0.0959 | -0.0054 | -0.0001 |   |
| 0.0039 | 1   | .   |                           |        |        |        |         |         |   |
| 3463   | O   | O   | . VAL VAL VAL B B 19 19 . | 0.0969 | 0.1065 | 0.1221 | 0.0113  | 0.0016  |   |
| 0.0126 | 1   | .   |                           |        |        |        |         |         |   |
| 3464   | N   | N   | . GLU GLU GLU B B 20 20 . | 0.0971 | 0.0921 | 0.0761 | 0.0038  | 0.0042  |   |
| 0.0233 | 1   | .   |                           |        |        |        |         |         |   |
| 3465   | CA  | CA  | . GLU GLU GLU B B 20 20 . | 0.0773 | 0.1008 | 0.0839 | 0.0059  | -0.0095 |   |
| 0.0155 | 1   | .   |                           |        |        |        |         |         |   |
| 3466   | CB  | CB  | . GLU GLU GLU B B 20 20 . | 0.0864 | 0.1007 | 0.1061 | 0.0014  | -0.0002 |   |
| 0.0167 | 1   | .   |                           |        |        |        |         |         |   |
| 3467   | CG  | CG  | . GLU GLU GLU B B 20 20 . | 0.1260 | 0.1061 | 0.1339 | 0.0138  | -0.0193 |   |
| 0.0102 | 1   | .   |                           |        |        |        |         |         |   |
| 3468   | CD  | CD  | . GLU GLU GLU B B 20 20 . | 0.1746 | 0.1491 | 0.1620 | 0.0393  | 0.0166  |   |
| 0.0240 | 1   | .   |                           |        |        |        |         |         |   |
| 3469   | OE1 | OE1 | . GLU GLU GLU B B 20 20 . | 0.1677 | 0.1429 | 0.1479 | 0.0184  | 0.0324  |   |
| 0.0429 | 1   | .   |                           |        |        |        |         |         |   |
| 3470   | OE2 | OE2 | . GLU GLU GLU B B 20 20 . | 0.1528 | 0.1544 | 0.1596 | 0.0261  | 0.0050  |   |
| 0.0218 | 1   | .   |                           |        |        |        |         |         |   |
| 3471   | C   | C   | . GLU GLU GLU B B 20 20 . | 0.0816 | 0.0987 | 0.0811 | 0.0053  | -0.0025 | - |
| 0.0026 | 1   | .   |                           |        |        |        |         |         |   |



|        |     |     |                           |        |        |        |         |         |
|--------|-----|-----|---------------------------|--------|--------|--------|---------|---------|
| 3502   | CZ  | CZ  | . TYR TYR TYR B B 24 24 . | 0.2228 | 0.3104 | 0.2838 | -0.0001 | -0.0638 |
| 0.0505 | 1   | .   |                           |        |        |        |         |         |
| 3503   | OH  | OH  | . TYR TYR TYR B B 24 24 . | 0.1800 | 0.3443 | 0.2938 | -0.0327 | -0.0415 |
| 0.0749 | 1   | .   |                           |        |        |        |         |         |
| 3504   | CE2 | CE2 | . TYR TYR TYR B B 24 24 . | 0.2402 | 0.3256 | 0.2499 | 0.0136  | -0.0249 |
| 0.0340 | 1   | .   |                           |        |        |        |         |         |
| 3505   | CD2 | CD2 | . TYR TYR TYR B B 24 24 . | 0.2202 | 0.2932 | 0.2087 | -0.0342 | 0.0089  |
| 0.0747 | 1   | .   |                           |        |        |        |         |         |
| 3506   | C   | C   | . TYR TYR TYR B B 24 24 . | 0.1787 | 0.1860 | 0.2139 | -0.0027 | -0.0067 |
| 0.0137 | 1   | .   |                           |        |        |        |         |         |
| 3507   | O   | O   | . TYR TYR TYR B B 24 24 . | 0.1764 | 0.1980 | 0.2237 | -0.0082 | 0.0220  |
| 0.0009 | 1   | .   |                           |        |        |        |         |         |
| 3508   | N   | N   | . THR THR THR B B 25 25 . | 0.1670 | 0.1804 | 0.2196 | -0.0152 | -0.0093 |
| 0.0068 | 1   | .   |                           |        |        |        |         |         |
| 3509   | CA  | CA  | . THR THR THR B B 25 25 . | 0.1888 | 0.1979 | 0.2367 | -0.0197 | 0.0022  |
| 0.0105 | 1   | .   |                           |        |        |        |         |         |
| 3510   | CB  | CB  | . THR THR THR B B 25 25 . | 0.1734 | 0.1682 | 0.1974 | -0.0193 | 0.0205  |
| 0.0104 | 1   | .   |                           |        |        |        |         |         |
| 3511   | OG1 | OG1 | . THR THR THR B B 25 25 . | 0.1714 | 0.1958 | 0.2444 | -0.0211 | 0.0255  |
| 0.0408 | 1   | .   |                           |        |        |        |         |         |
| 3512   | CG2 | CG2 | . THR THR THR B B 25 25 . | 0.2043 | 0.2086 | 0.2250 | -0.0208 | 0.0568  |
| 0.0006 | 1   | .   |                           |        |        |        |         |         |
| 3513   | C   | C   | . THR THR THR B B 25 25 . | 0.1961 | 0.2112 | 0.2281 | -0.0230 | -0.0034 |
| 0.0125 | 1   | .   |                           |        |        |        |         |         |
| 3514   | O   | O   | . THR THR THR B B 25 25 . | 0.1807 | 0.2211 | 0.2539 | -0.0293 | 0.0092  |
| 0.0155 | 1   | .   |                           |        |        |        |         |         |
| 3515   | N   | N   | . ALA ALA ALA B B 26 26 . | 0.1812 | 0.2351 | 0.2593 | -0.0304 | -0.0061 |
| 0.0158 | 1   | .   |                           |        |        |        |         |         |
| 3516   | CA  | CA  | . ALA ALA ALA B B 26 26 . | 0.2106 | 0.2356 | 0.2907 | -0.0166 | -0.0130 |
| 0.0264 | 1   | .   |                           |        |        |        |         |         |
| 3517   | CB  | CB  | . ALA ALA ALA B B 26 26 . | 0.2249 | 0.2506 | 0.3132 | -0.0325 | -0.0372 |
| 0.0307 | 1   | .   |                           |        |        |        |         |         |
| 3518   | C   | C   | . ALA ALA ALA B B 26 26 . | 0.2294 | 0.2520 | 0.2912 | -0.0137 | -0.0162 |
| 0.0322 | 1   | .   |                           |        |        |        |         |         |
| 3519   | O   | O   | . ALA ALA ALA B B 26 26 . | 0.2207 | 0.2549 | 0.3228 | -0.0304 | 0.0130  |
| 0.0660 | 1   | .   |                           |        |        |        |         |         |
| 3520   | N   | N   | . LYS LYS LYS B B 27 27 . | 0.2166 | 0.2354 | 0.2679 | -0.0076 | -0.0288 |
| 0.0126 | 1   | .   |                           |        |        |        |         |         |
| 3521   | CA  | CA  | . LYS LYS LYS B B 27 27 . | 0.2496 | 0.2524 | 0.2821 | -0.0024 | -0.0247 |
| 0.0057 | 1   | .   |                           |        |        |        |         |         |
| 3522   | CB  | CB  | . LYS LYS LYS B B 27 27 . | 0.2660 | 0.2509 | 0.2747 | 0.0053  | -0.0325 |
| 0.0074 | 1   | .   |                           |        |        |        |         |         |
| 3523   | CG  | CG  | . LYS LYS LYS B B 27 27 . | 0.3185 | 0.3444 | 0.3290 | 0.0046  | -0.0509 |
| 0.0115 | 1   | .   |                           |        |        |        |         |         |
| 3524   | CD  | CD  | . LYS LYS LYS B B 27 27 . | 0.3857 | 0.3775 | 0.2652 | -0.0133 | -0.0029 |
| 0.0024 | 1   | .   |                           |        |        |        |         |         |
| 3525   | CE  | CE  | . LYS LYS LYS B B 27 27 . | 0.3814 | 0.3636 | 0.3874 | -0.0726 | -0.0092 |
| 0.0220 | 1   | .   |                           |        |        |        |         |         |
| 3526   | NZ  | NZ  | . LYS LYS LYS B B 27 27 . | 0.3705 | 0.4494 | 0.4448 | -0.1083 | 0.0283  |
| 0.0398 | 1   | .   |                           |        |        |        |         |         |
| 3527   | C   | C   | . LYS LYS LYS B B 27 27 . | 0.2249 | 0.2395 | 0.2760 | -0.0008 | -0.0207 |
| 0.0158 | 1   | .   |                           |        |        |        |         |         |
| 3528   | O   | O   | . LYS LYS LYS B B 27 27 . | 0.2502 | 0.2798 | 0.3464 | 0.0061  | -0.0307 |
| 0.0017 | 1   | .   |                           |        |        |        |         |         |
| 3529   | N   | N   | . GLY GLY GLY B B 28 28 . | 0.1985 | 0.2319 | 0.2416 | -0.0098 | -0.0279 |
| 0.0267 | 1   | .   |                           |        |        |        |         |         |
| 3530   | CA  | CA  | . GLY GLY GLY B B 28 28 . | 0.1962 | 0.2285 | 0.2674 | -0.0338 | -0.0202 |
| 0.0359 | 1   | .   |                           |        |        |        |         |         |
| 3531   | C   | C   | . GLY GLY GLY B B 28 28 . | 0.1914 | 0.2144 | 0.2421 | -0.0260 | -0.0110 |
| 0.0391 | 1   | .   |                           |        |        |        |         |         |

|        |     |     |                           |        |        |        |         |         |   |
|--------|-----|-----|---------------------------|--------|--------|--------|---------|---------|---|
| 3532   | O   | O   | . GLY GLY GLY B B 28 28 . | 0.1545 | 0.1877 | 0.2176 | -0.0266 | 0.0078  |   |
| 0.0333 | 1   | .   |                           |        |        |        |         |         |   |
| 3533   | N   | N   | . LEU LEU LEU B B 29 29 . | 0.1492 | 0.1962 | 0.2177 | -0.0157 | -0.0208 |   |
| 0.0457 | 1   | .   |                           |        |        |        |         |         |   |
| 3534   | CA  | CA  | . LEU LEU LEU B B 29 29 . | 0.1835 | 0.1963 | 0.2118 | -0.0075 | -0.0221 |   |
| 0.0161 | 1   | .   |                           |        |        |        |         |         |   |
| 3535   | CB  | CB  | . LEU LEU LEU B B 29 29 . | 0.1586 | 0.2041 | 0.2092 | -0.0112 | -0.0297 |   |
| 0.0235 | 1   | .   |                           |        |        |        |         |         |   |
| 3536   | CG  | CG  | . LEU LEU LEU B B 29 29 . | 0.2426 | 0.2270 | 0.2818 | -0.0195 | -0.0745 |   |
| 0.0089 | 1   | .   |                           |        |        |        |         |         |   |
| 3537   | CD1 | CD1 | . LEU LEU LEU B B 29 29 . | 0.3111 | 0.2206 | 0.3271 | -0.0209 | -0.0589 | - |
| 0.0387 | 1   | .   |                           |        |        |        |         |         |   |
| 3538   | CD2 | CD2 | . LEU LEU LEU B B 29 29 . | 0.1940 | 0.2894 | 0.2360 | -0.0263 | -0.0640 |   |
| 0.0133 | 1   | .   |                           |        |        |        |         |         |   |
| 3539   | C   | C   | . LEU LEU LEU B B 29 29 . | 0.1545 | 0.1794 | 0.1919 | 0.0047  | -0.0117 |   |
| 0.0030 | 1   | .   |                           |        |        |        |         |         |   |
| 3540   | O   | O   | . LEU LEU LEU B B 29 29 . | 0.1961 | 0.2013 | 0.2373 | 0.0118  | 0.0055  | - |
| 0.0007 | 1   | .   |                           |        |        |        |         |         |   |
| 3541   | N   | N   | . PHE PHE PHE B B 30 30 . | 0.1312 | 0.1651 | 0.1671 | -0.0059 | 0.0069  | - |
| 0.0045 | 1   | .   |                           |        |        |        |         |         |   |
| 3542   | CA  | CA  | . PHE PHE PHE B B 30 30 . | 0.1377 | 0.1282 | 0.1606 | -0.0102 | 0.0033  | - |
| 0.0017 | 1   | .   |                           |        |        |        |         |         |   |
| 3543   | CB  | CB  | . PHE PHE PHE B B 30 30 . | 0.1195 | 0.1295 | 0.1421 | -0.0190 | 0.0098  |   |
| 0.0028 | 1   | .   |                           |        |        |        |         |         |   |
| 3544   | CG  | CG  | . PHE PHE PHE B B 30 30 . | 0.1165 | 0.1523 | 0.1936 | -0.0147 | 0.0022  |   |
| 0.0000 | 1   | .   |                           |        |        |        |         |         |   |
| 3545   | CD1 | CD1 | . PHE PHE PHE B B 30 30 . | 0.1321 | 0.1603 | 0.1667 | -0.0117 | -0.0105 |   |
| 0.0030 | 1   | .   |                           |        |        |        |         |         |   |
| 3546   | CE1 | CE1 | . PHE PHE PHE B B 30 30 . | 0.1292 | 0.1781 | 0.1575 | -0.0398 | 0.0073  |   |
| 0.0144 | 1   | .   |                           |        |        |        |         |         |   |
| 3547   | CZ  | CZ  | . PHE PHE PHE B B 30 30 . | 0.1380 | 0.2168 | 0.1548 | 0.0267  | 0.0351  | - |
| 0.0230 | 1   | .   |                           |        |        |        |         |         |   |
| 3548   | CE2 | CE2 | . PHE PHE PHE B B 30 30 . | 0.1830 | 0.1691 | 0.2202 | -0.0142 | 0.0303  | - |
| 0.0039 | 1   | .   |                           |        |        |        |         |         |   |
| 3549   | CD2 | CD2 | . PHE PHE PHE B B 30 30 . | 0.1262 | 0.1886 | 0.1815 | -0.0146 | -0.0030 |   |
| 0.0050 | 1   | .   |                           |        |        |        |         |         |   |
| 3550   | C   | C   | . PHE PHE PHE B B 30 30 . | 0.1345 | 0.1540 | 0.1897 | -0.0036 | 0.0007  |   |
| 0.0002 | 1   | .   |                           |        |        |        |         |         |   |
| 3551   | O   | O   | . PHE PHE PHE B B 30 30 . | 0.1755 | 0.1527 | 0.2337 | -0.0119 | 0.0000  | - |
| 0.0377 | 1   | .   |                           |        |        |        |         |         |   |
| 3552   | N   | N   | . ARG ARG ARG B B 31 31 . | 0.1137 | 0.1341 | 0.1648 | 0.0076  | -0.0109 |   |
| 0.0252 | 1   | .   |                           |        |        |        |         |         |   |
| 3553   | CA  | CA  | . ARG ARG ARG B B 31 31 . | 0.1049 | 0.0947 | 0.1154 | 0.0122  | -0.0120 |   |
| 0.0016 | 1   | .   |                           |        |        |        |         |         |   |
| 3554   | CB  | CB  | . ARG ARG ARG B B 31 31 . | 0.1139 | 0.1182 | 0.1287 | 0.0036  | -0.0420 |   |
| 0.0238 | 1   | .   |                           |        |        |        |         |         |   |
| 3555   | CG  | CG  | . ARG ARG ARG B B 31 31 . | 0.1123 | 0.0981 | 0.1112 | 0.0146  | -0.0288 | - |
| 0.0056 | 1   | .   |                           |        |        |        |         |         |   |
| 3556   | CD  | CD  | . ARG ARG ARG B B 31 31 . | 0.1269 | 0.1137 | 0.1262 | 0.0147  | -0.0341 |   |
| 0.0270 | 1   | .   |                           |        |        |        |         |         |   |
| 3557   | NE  | NE  | . ARG ARG ARG B B 31 31 . | 0.1487 | 0.1272 | 0.1407 | 0.0243  | -0.0164 | - |
| 0.0019 | 1   | .   |                           |        |        |        |         |         |   |
| 3558   | CZ  | CZ  | . ARG ARG ARG B B 31 31 . | 0.1761 | 0.1913 | 0.1630 | 0.0053  | -0.0151 | - |
| 0.0010 | 1   | .   |                           |        |        |        |         |         |   |
| 3559   | NH1 | NH1 | . ARG ARG ARG B B 31 31 . | 0.2173 | 0.2077 | 0.1670 | -0.1088 | -0.0147 |   |
| 0.0015 | 1   | .   |                           |        |        |        |         |         |   |
| 3560   | NH2 | NH2 | . ARG ARG ARG B B 31 31 . | 0.1819 | 0.1621 | 0.1715 | 0.0045  | -0.0107 | - |
| 0.0253 | 1   | .   |                           |        |        |        |         |         |   |
| 3561   | C   | C   | . ARG ARG ARG B B 31 31 . | 0.1235 | 0.1071 | 0.1258 | 0.0104  | 0.0051  |   |
| 0.0117 | 1   | .   |                           |        |        |        |         |         |   |

|        |     |     |                           |        |        |        |         |         |   |
|--------|-----|-----|---------------------------|--------|--------|--------|---------|---------|---|
| 3562   | O   | O   | . ARG ARG ARG B B 31 31 . | 0.1289 | 0.1142 | 0.1243 | -0.0009 | 0.0031  |   |
| 0.0249 | 1   | .   |                           |        |        |        |         |         |   |
| 3563   | N   | N   | . ALA ALA ALA B B 32 32 . | 0.0882 | 0.1003 | 0.1194 | 0.0068  | 0.0085  |   |
| 0.0157 | 1   | .   |                           |        |        |        |         |         |   |
| 3564   | CA  | CA  | . ALA ALA ALA B B 32 32 . | 0.1048 | 0.1051 | 0.1127 | 0.0061  | 0.0024  |   |
| 0.0100 | 1   | .   |                           |        |        |        |         |         |   |
| 3565   | CB  | CB  | . ALA ALA ALA B B 32 32 . | 0.1218 | 0.1210 | 0.1157 | 0.0004  | -0.0043 |   |
| 0.0121 | 1   | .   |                           |        |        |        |         |         |   |
| 3566   | C   | C   | . ALA ALA ALA B B 32 32 . | 0.0995 | 0.1048 | 0.1115 | 0.0107  | 0.0000  |   |
| 0.0091 | 1   | .   |                           |        |        |        |         |         |   |
| 3567   | O   | O   | . ALA ALA ALA B B 32 32 . | 0.0932 | 0.1198 | 0.0917 | -0.0112 | 0.0036  |   |
| 0.0043 | 1   | .   |                           |        |        |        |         |         |   |
| 3568   | N   | N   | . ALA ALA ALA B B 33 33 . | 0.0893 | 0.1035 | 0.1213 | 0.0074  | -0.0124 |   |
| 0.0188 | 1   | .   |                           |        |        |        |         |         |   |
| 3569   | CA  | CA  | . ALA ALA ALA B B 33 33 . | 0.0863 | 0.1009 | 0.1019 | 0.0030  | -0.0193 |   |
| 0.0099 | 1   | .   |                           |        |        |        |         |         |   |
| 3570   | CB  | CB  | . ALA ALA ALA B B 33 33 . | 0.0712 | 0.1301 | 0.1256 | 0.0237  | -0.0354 | - |
| 0.0175 | 1   | .   |                           |        |        |        |         |         |   |
| 3571   | C   | C   | . ALA ALA ALA B B 33 33 . | 0.1299 | 0.1134 | 0.1121 | 0.0038  | -0.0092 | - |
| 0.0015 | 1   | .   |                           |        |        |        |         |         |   |
| 3572   | O   | O   | . ALA ALA ALA B B 33 33 . | 0.1320 | 0.1123 | 0.1214 | 0.0069  | -0.0002 | - |
| 0.0118 | 1   | .   |                           |        |        |        |         |         |   |
| 3573   | N   | N   | . VAL VAL VAL B B 34 34 . | 0.1154 | 0.0938 | 0.1162 | -0.0028 | 0.0023  |   |
| 0.0111 | 1   | .   |                           |        |        |        |         |         |   |
| 3574   | CA  | CA  | . VAL VAL VAL B B 34 34 . | 0.1068 | 0.0979 | 0.1071 | 0.0115  | 0.0015  |   |
| 0.0020 | 1   | .   |                           |        |        |        |         |         |   |
| 3575   | CB  | CB  | . VAL VAL VAL B B 34 34 . | 0.0973 | 0.0980 | 0.0996 | 0.0133  | 0.0136  |   |
| 0.0037 | 1   | .   |                           |        |        |        |         |         |   |
| 3576   | CG1 | CG1 | . VAL VAL VAL B B 34 34 . | 0.1016 | 0.0921 | 0.0912 | 0.0069  | 0.0142  | - |
| 0.0096 | 1   | .   |                           |        |        |        |         |         |   |
| 3577   | CG2 | CG2 | . VAL VAL VAL B B 34 34 . | 0.1026 | 0.1372 | 0.1086 | 0.0249  | -0.0144 | - |
| 0.0025 | 1   | .   |                           |        |        |        |         |         |   |
| 3578   | C   | C   | . VAL VAL VAL B B 34 34 . | 0.0848 | 0.0906 | 0.0975 | 0.0132  | -0.0019 |   |
| 0.0001 | 1   | .   |                           |        |        |        |         |         |   |
| 3579   | O   | O   | . VAL VAL VAL B B 34 34 . | 0.1188 | 0.1051 | 0.0743 | 0.0375  | -0.0019 | - |
| 0.0151 | 1   | .   |                           |        |        |        |         |         |   |
| 3580   | N   | N   | . PRO PRO PRO B B 35 35 . | 0.0902 | 0.0974 | 0.0729 | 0.0143  | -0.0064 | - |
| 0.0024 | 1   | .   |                           |        |        |        |         |         |   |
| 3581   | CA  | CA  | . PRO PRO PRO B B 35 35 . | 0.0924 | 0.0708 | 0.0625 | 0.0069  | 0.0069  |   |
| 0.0016 | 1   | .   |                           |        |        |        |         |         |   |
| 3582   | CB  | CB  | . PRO PRO PRO B B 35 35 . | 0.0824 | 0.0875 | 0.0789 | 0.0090  | -0.0087 | - |
| 0.0083 | 1   | .   |                           |        |        |        |         |         |   |
| 3583   | CG  | CG  | . PRO PRO PRO B B 35 35 . | 0.0762 | 0.0707 | 0.0943 | 0.0133  | 0.0076  | - |
| 0.0215 | 1   | .   |                           |        |        |        |         |         |   |
| 3584   | CD  | CD  | . PRO PRO PRO B B 35 35 . | 0.0782 | 0.0861 | 0.0805 | 0.0040  | -0.0121 | - |
| 0.0063 | 1   | .   |                           |        |        |        |         |         |   |
| 3585   | C   | C   | . PRO PRO PRO B B 35 35 . | 0.0905 | 0.0782 | 0.0648 | 0.0086  | 0.0117  |   |
| 0.0141 | 1   | .   |                           |        |        |        |         |         |   |
| 3586   | O   | O   | . PRO PRO PRO B B 35 35 . | 0.1113 | 0.0985 | 0.1294 | 0.0165  | 0.0190  |   |
| 0.0151 | 1   | .   |                           |        |        |        |         |         |   |
| 3587   | N   | N   | . SER SER SER B B 36 36 . | 0.1081 | 0.0711 | 0.0731 | 0.0049  | -0.0018 |   |
| 0.0029 | 1   | .   |                           |        |        |        |         |         |   |
| 3588   | CA  | CA  | . SER SER SER B B 36 36 . | 0.1139 | 0.0929 | 0.0820 | -0.0075 | 0.0063  | - |
| 0.0163 | 1   | .   |                           |        |        |        |         |         |   |
| 3589   | CB  | CB  | . SER SER SER B B 36 36 . | 0.0947 | 0.1003 | 0.0613 | 0.0033  | -0.0077 | - |
| 0.0215 | 1   | .   |                           |        |        |        |         |         |   |
| 3590   | OG  | OG  | . SER SER SER B B 36 36 . | 0.1485 | 0.1289 | 0.1193 | -0.0124 | 0.0132  | - |
| 0.0155 | 1   | .   |                           |        |        |        |         |         |   |
| 3591   | C   | C   | . SER SER SER B B 36 36 . | 0.0940 | 0.0784 | 0.0730 | -0.0046 | -0.0139 | - |
| 0.0040 | 1   | .   |                           |        |        |        |         |         |   |



|        |     |     |                           |        |        |        |         |         |   |
|--------|-----|-----|---------------------------|--------|--------|--------|---------|---------|---|
| 3592   | O   | O   | . SER SER SER B B 36 36 . | 0.0802 | 0.0886 | 0.0737 | 0.0182  | -0.0049 |   |
| 0.0005 | 1   | .   |                           |        |        |        |         |         |   |
| 3593   | N   | N   | . GLY GLY GLY B B 37 37 . | 0.1056 | 0.0764 | 0.0804 | -0.0063 | 0.0008  | - |
| 0.0123 | 1   | .   |                           |        |        |        |         |         |   |
| 3594   | CA  | CA  | . GLY GLY GLY B B 37 37 . | 0.1094 | 0.1082 | 0.0806 | -0.0168 | -0.0041 | - |
| 0.0005 | 1   | .   |                           |        |        |        |         |         |   |
| 3595   | C   | C   | . GLY GLY GLY B B 37 37 . | 0.1072 | 0.0947 | 0.0988 | 0.0085  | -0.0072 |   |
| 0.0027 | 1   | .   |                           |        |        |        |         |         |   |
| 3596   | O   | O   | . GLY GLY GLY B B 37 37 . | 0.1303 | 0.1083 | 0.0947 | 0.0151  | -0.0107 | - |
| 0.0194 | 1   | .   |                           |        |        |        |         |         |   |
| 3597   | N   | N   | . ALA ALA ALA B B 38 38 . | 0.1230 | 0.1024 | 0.0854 | 0.0097  | 0.0092  |   |
| 0.0022 | 1   | .   |                           |        |        |        |         |         |   |
| 3598   | CA  | CA  | . ALA ALA ALA B B 38 38 . | 0.1179 | 0.1119 | 0.1151 | -0.0004 | -0.0082 |   |
| 0.0080 | 1   | .   |                           |        |        |        |         |         |   |
| 3599   | CB  | CB  | . ALA ALA ALA B B 38 38 . | 0.1213 | 0.1237 | 0.1336 | 0.0167  | -0.0057 |   |
| 0.0015 | 1   | .   |                           |        |        |        |         |         |   |
| 3600   | C   | C   | . ALA ALA ALA B B 38 38 . | 0.1520 | 0.1075 | 0.0934 | 0.0193  | -0.0132 |   |
| 0.0077 | 1   | .   |                           |        |        |        |         |         |   |
| 3601   | O   | O   | . ALA ALA ALA B B 38 38 . | 0.1621 | 0.1063 | 0.1004 | 0.0103  | 0.0014  | - |
| 0.0155 | 1   | .   |                           |        |        |        |         |         |   |
| 3602   | N   | N   | . SER SER SER B B 39 39 . | 0.1388 | 0.1229 | 0.1137 | 0.0114  | -0.0093 |   |
| 0.0163 | 1   | .   |                           |        |        |        |         |         |   |
| 3603   | CA  | CA  | . SER SER SER B B 39 39 . | 0.1133 | 0.1058 | 0.0826 | 0.0161  | -0.0098 |   |
| 0.0014 | 1   | .   |                           |        |        |        |         |         |   |
| 3604   | CB  | CB  | . SER SER SER B B 39 39 . | 0.1311 | 0.1080 | 0.0726 | -0.0088 | 0.0104  | - |
| 0.0278 | 1   | .   |                           |        |        |        |         |         |   |
| 3605   | OG  | OG  | . SER SER SER B B 39 39 . | 0.0983 | 0.0979 | 0.0774 | -0.0054 | -0.0118 |   |
| 0.0091 | 1   | .   |                           |        |        |        |         |         |   |
| 3606   | C   | C   | . SER SER SER B B 39 39 . | 0.1114 | 0.1015 | 0.1001 | 0.0089  | -0.0064 | - |
| 0.0001 | 1   | .   |                           |        |        |        |         |         |   |
| 3607   | O   | O   | . SER SER SER B B 39 39 . | 0.1518 | 0.0807 | 0.0759 | 0.0062  | -0.0280 | - |
| 0.0119 | 1   | .   |                           |        |        |        |         |         |   |
| 3608   | N   | N   | . THR THR THR B B 40 40 . | 0.1335 | 0.1271 | 0.1020 | -0.0001 | -0.0112 |   |
| 0.0108 | 1   | .   |                           |        |        |        |         |         |   |
| 3609   | CA  | CA  | . THR THR THR B B 40 40 . | 0.1156 | 0.1052 | 0.0973 | 0.0072  | 0.0039  |   |
| 0.0273 | 1   | .   |                           |        |        |        |         |         |   |
| 3610   | CB  | CB  | . THR THR THR B B 40 40 . | 0.1486 | 0.1204 | 0.1203 | -0.0094 | 0.0150  |   |
| 0.0177 | 1   | .   |                           |        |        |        |         |         |   |
| 3611   | OG1 | OG1 | . THR THR THR B B 40 40 . | 0.1734 | 0.1442 | 0.1410 | 0.0263  | 0.0206  | - |
| 0.0128 | 1   | .   |                           |        |        |        |         |         |   |
| 3612   | CG2 | CG2 | . THR THR THR B B 40 40 . | 0.1260 | 0.0793 | 0.0810 | 0.0437  | 0.0083  |   |
| 0.0347 | 1   | .   |                           |        |        |        |         |         |   |
| 3613   | C   | C   | . THR THR THR B B 40 40 . | 0.1275 | 0.1129 | 0.1145 | 0.0083  | -0.0137 |   |
| 0.0155 | 1   | .   |                           |        |        |        |         |         |   |
| 3614   | O   | O   | . THR THR THR B B 40 40 . | 0.1899 | 0.1130 | 0.1358 | -0.0103 | -0.0360 |   |
| 0.0171 | 1   | .   |                           |        |        |        |         |         |   |
| 3615   | N   | N   | . GLY GLY GLY B B 41 41 . | 0.1114 | 0.0902 | 0.0814 | 0.0142  | -0.0125 |   |
| 0.0125 | 1   | .   |                           |        |        |        |         |         |   |
| 3616   | CA  | CA  | . GLY GLY GLY B B 41 41 . | 0.1205 | 0.0708 | 0.0981 | 0.0153  | 0.0068  |   |
| 0.0131 | 1   | .   |                           |        |        |        |         |         |   |
| 3617   | C   | C   | . GLY GLY GLY B B 41 41 . | 0.1203 | 0.0953 | 0.1094 | 0.0030  | 0.0030  |   |
| 0.0119 | 1   | .   |                           |        |        |        |         |         |   |
| 3618   | O   | O   | . GLY GLY GLY B B 41 41 . | 0.1423 | 0.0820 | 0.1102 | 0.0141  | -0.0051 |   |
| 0.0104 | 1   | .   |                           |        |        |        |         |         |   |
| 3619   | N   | N   | . ILE ILE ILE B B 42 42 . | 0.1292 | 0.0703 | 0.0781 | 0.0156  | -0.0026 |   |
| 0.0170 | 1   | .   |                           |        |        |        |         |         |   |
| 3620   | CA  | CA  | . ILE ILE ILE B B 42 42 . | 0.1268 | 0.0970 | 0.1154 | 0.0107  | -0.0008 |   |
| 0.0143 | 1   | .   |                           |        |        |        |         |         |   |
| 3621   | CB  | CB  | . ILE ILE ILE B B 42 42 . | 0.0946 | 0.0610 | 0.0739 | 0.0007  | -0.0024 |   |
| 0.0056 | 1   | .   |                           |        |        |        |         |         |   |



|        |     |     |                           |        |        |        |         |         |   |
|--------|-----|-----|---------------------------|--------|--------|--------|---------|---------|---|
| 3652   | O   | O   | . ALA ALA ALA B B 45 45 . | 0.1480 | 0.1314 | 0.1277 | 0.0436  | 0.0051  |   |
| 0.0089 | 1   | .   |                           |        |        |        |         |         |   |
| 3653   | N   | N   | . LEU LEU LEU B B 46 46 . | 0.1301 | 0.1102 | 0.1166 | 0.0111  | -0.0009 | - |
| 0.0059 | 1   | .   |                           |        |        |        |         |         |   |
| 3654   | CA  | CA  | . LEU LEU LEU B B 46 46 . | 0.1370 | 0.1251 | 0.1164 | 0.0235  | -0.0109 | - |
| 0.0017 | 1   | .   |                           |        |        |        |         |         |   |
| 3655   | CB  | CB  | . LEU LEU LEU B B 46 46 . | 0.1742 | 0.1126 | 0.1381 | 0.0205  | -0.0232 | - |
| 0.0154 | 1   | .   |                           |        |        |        |         |         |   |
| 3656   | CG  | CG  | . LEU LEU LEU B B 46 46 . | 0.1971 | 0.1994 | 0.2007 | 0.0211  | -0.0206 | - |
| 0.0415 | 1   | .   |                           |        |        |        |         |         |   |
| 3657   | CD1 | CD1 | . LEU LEU LEU B B 46 46 . | 0.2528 | 0.2329 | 0.2762 | -0.0702 | -0.0138 | - |
| 0.0329 | 1   | .   |                           |        |        |        |         |         |   |
| 3658   | CD2 | CD2 | . LEU LEU LEU B B 46 46 . | 0.2672 | 0.2846 | 0.2426 | 0.0426  | 0.0113  | - |
| 0.0260 | 1   | .   |                           |        |        |        |         |         |   |
| 3659   | C   | C   | . LEU LEU LEU B B 46 46 . | 0.1421 | 0.1415 | 0.1233 | 0.0074  | -0.0004 |   |
| 0.0039 | 1   | .   |                           |        |        |        |         |         |   |
| 3660   | O   | O   | . LEU LEU LEU B B 46 46 . | 0.1700 | 0.1784 | 0.1555 | 0.0006  | -0.0014 |   |
| 0.0196 | 1   | .   |                           |        |        |        |         |         |   |
| 3661   | N   | N   | . GLU GLU GLU B B 47 47 . | 0.1271 | 0.1271 | 0.0988 | 0.0304  | 0.0108  |   |
| 0.0133 | 1   | .   |                           |        |        |        |         |         |   |
| 3662   | CA  | CA  | . GLU GLU GLU B B 47 47 . | 0.1095 | 0.1152 | 0.0834 | 0.0280  | -0.0012 |   |
| 0.0052 | 1   | .   |                           |        |        |        |         |         |   |
| 3663   | CB  | CB  | . GLU GLU GLU B B 47 47 . | 0.1079 | 0.1034 | 0.0967 | 0.0334  | -0.0119 |   |
| 0.0037 | 1   | .   |                           |        |        |        |         |         |   |
| 3664   | CG  | CG  | . GLU GLU GLU B B 47 47 . | 0.1097 | 0.1260 | 0.0702 | 0.0482  | -0.0070 | - |
| 0.0090 | 1   | .   |                           |        |        |        |         |         |   |
| 3665   | CD  | CD  | . GLU GLU GLU B B 47 47 . | 0.1235 | 0.1425 | 0.1261 | 0.0189  | -0.0063 | - |
| 0.0283 | 1   | .   |                           |        |        |        |         |         |   |
| 3666   | OE1 | OE1 | . GLU GLU GLU B B 47 47 . | 0.2148 | 0.1292 | 0.1197 | 0.0116  | 0.0141  | - |
| 0.0145 | 1   | .   |                           |        |        |        |         |         |   |
| 3667   | OE2 | OE2 | . GLU GLU GLU B B 47 47 . | 0.1852 | 0.1699 | 0.1752 | 0.0201  | 0.0247  | - |
| 0.0060 | 1   | .   |                           |        |        |        |         |         |   |
| 3668   | C   | C   | . GLU GLU GLU B B 47 47 . | 0.1172 | 0.1064 | 0.1175 | 0.0045  | 0.0036  |   |
| 0.0029 | 1   | .   |                           |        |        |        |         |         |   |
| 3669   | O   | O   | . GLU GLU GLU B B 47 47 . | 0.1411 | 0.1234 | 0.1400 | -0.0094 | 0.0172  |   |
| 0.0114 | 1   | .   |                           |        |        |        |         |         |   |
| 3670   | N   | N   | . LEU LEU LEU B B 48 48 . | 0.1166 | 0.0824 | 0.0822 | 0.0267  | 0.0106  | - |
| 0.0174 | 1   | .   |                           |        |        |        |         |         |   |
| 3671   | CA  | CA  | . LEU LEU LEU B B 48 48 . | 0.1254 | 0.1020 | 0.1088 | 0.0152  | 0.0023  | - |
| 0.0028 | 1   | .   |                           |        |        |        |         |         |   |
| 3672   | CB  | CB  | . LEU LEU LEU B B 48 48 . | 0.1235 | 0.1022 | 0.1116 | 0.0208  | 0.0205  | - |
| 0.0185 | 1   | .   |                           |        |        |        |         |         |   |
| 3673   | CG  | CG  | . LEU LEU LEU B B 48 48 . | 0.1297 | 0.1214 | 0.1058 | -0.0010 | 0.0210  | - |
| 0.0246 | 1   | .   |                           |        |        |        |         |         |   |
| 3674   | CD1 | CD1 | . LEU LEU LEU B B 48 48 . | 0.2066 | 0.1392 | 0.1605 | 0.0172  | 0.0145  | - |
| 0.0305 | 1   | .   |                           |        |        |        |         |         |   |
| 3675   | CD2 | CD2 | . LEU LEU LEU B B 48 48 . | 0.1437 | 0.1606 | 0.1091 | -0.0132 | -0.0039 |   |
| 0.0042 | 1   | .   |                           |        |        |        |         |         |   |
| 3676   | C   | C   | . LEU LEU LEU B B 48 48 . | 0.1329 | 0.1140 | 0.1017 | 0.0018  | 0.0009  | - |
| 0.0142 | 1   | .   |                           |        |        |        |         |         |   |
| 3677   | O   | O   | . LEU LEU LEU B B 48 48 . | 0.1308 | 0.0951 | 0.1088 | 0.0313  | -0.0036 | - |
| 0.0140 | 1   | .   |                           |        |        |        |         |         |   |
| 3678   | N   | N   | . ARG ARG ARG B B 49 49 . | 0.1514 | 0.1050 | 0.1355 | 0.0081  | -0.0104 | - |
| 0.0136 | 1   | .   |                           |        |        |        |         |         |   |
| 3679   | CA  | CA  | . ARG ARG ARG B B 49 49 . | 0.1571 | 0.1186 | 0.1173 | 0.0106  | -0.0086 | - |
| 0.0203 | 1   | .   |                           |        |        |        |         |         |   |
| 3680   | CB  | CB  | . ARG ARG ARG B B 49 49 . | 0.1910 | 0.1556 | 0.1389 | 0.0379  | -0.0015 | - |
| 0.0227 | 1   | .   |                           |        |        |        |         |         |   |
| 3681   | CG  | CG  | . ARG ARG ARG B B 49 49 . | 0.2037 | 0.1914 | 0.1934 | 0.0740  | -0.0019 | - |
| 0.0631 | 1   | .   |                           |        |        |        |         |         |   |





|        |     |     |                         |                                          |
|--------|-----|-----|-------------------------|------------------------------------------|
| 3742   | OH  | OH  | . TYR TYR TYR B B 56 56 | . 0.1574 0.1193 0.1305 -0.0233 -0.0159 - |
| 0.0160 | 1 . |     |                         |                                          |
| 3743   | CE2 | CE2 | . TYR TYR TYR B B 56 56 | . 0.1018 0.1198 0.1291 -0.0071 0.0183    |
| 0.0035 | 1 . |     |                         |                                          |
| 3744   | CD2 | CD2 | . TYR TYR TYR B B 56 56 | . 0.0903 0.1076 0.1010 0.0141 -0.0316 -  |
| 0.0022 | 1 . |     |                         |                                          |
| 3745   | C   | C   | . TYR TYR TYR B B 56 56 | . 0.1712 0.1655 0.1617 -0.0053 -0.0164 - |
| 0.0115 | 1 . |     |                         |                                          |
| 3746   | O   | O   | . TYR TYR TYR B B 56 56 | . 0.1617 0.1684 0.1636 -0.0028 -0.0120 - |
| 0.0160 | 1 . |     |                         |                                          |
| 3747   | N   | N   | . LEU LEU LEU B B 57 57 | . 0.1980 0.1893 0.2092 -0.0254 -0.0139 - |
| 0.0088 | 1 . |     |                         |                                          |
| 3748   | CA  | CA  | . LEU LEU LEU B B 57 57 | . 0.2138 0.2042 0.2233 -0.0188 0.0044 -  |
| 0.0002 | 1 . |     |                         |                                          |
| 3749   | CB  | CB  | . LEU LEU LEU B B 57 57 | . 0.2270 0.2779 0.2744 -0.0309 -0.0074   |
| 0.0096 | 1 . |     |                         |                                          |
| 3750   | CG  | CG  | . LEU LEU LEU B B 57 57 | . 0.2906 0.3451 0.3398 -0.0345 -0.0248   |
| 0.0152 | 1 . |     |                         |                                          |
| 3751   | CD1 | CD1 | . LEU LEU LEU B B 57 57 | . 0.3502 0.3295 0.4471 -0.0136 -0.0302 - |
| 0.0755 | 1 . |     |                         |                                          |
| 3752   | CD2 | CD2 | . LEU LEU LEU B B 57 57 | . 0.3713 0.4406 0.4591 -0.1002 -0.0099 - |
| 0.0029 | 1 . |     |                         |                                          |
| 3753   | C   | C   | . LEU LEU LEU B B 57 57 | . 0.2040 0.1942 0.2083 -0.0246 0.0080 -  |
| 0.0069 | 1 . |     |                         |                                          |
| 3754   | O   | O   | . LEU LEU LEU B B 57 57 | . 0.2048 0.2131 0.2100 -0.0262 0.0078 -  |
| 0.0099 | 1 . |     |                         |                                          |
| 3755   | N   | N   | . GLY GLY GLY B B 58 58 | . 0.1830 0.1223 0.1976 -0.0090 0.0072 -  |
| 0.0149 | 1 . |     |                         |                                          |
| 3756   | CA  | CA  | . GLY GLY GLY B B 58 58 | . 0.2001 0.1536 0.1768 -0.0150 -0.0150 - |
| 0.0177 | 1 . |     |                         |                                          |
| 3757   | C   | C   | . GLY GLY GLY B B 58 58 | . 0.1606 0.1543 0.1735 0.0013 -0.0073 -  |
| 0.0022 | 1 . |     |                         |                                          |
| 3758   | O   | O   | . GLY GLY GLY B B 58 58 | . 0.1787 0.1358 0.1842 0.0046 -0.0277    |
| 0.0127 | 1 . |     |                         |                                          |
| 3759   | N   | N   | . LYS LYS LYS B B 59 59 | . 0.1602 0.1231 0.1581 -0.0149 0.0138    |
| 0.0053 | 1 . |     |                         |                                          |
| 3760   | CA  | CA  | . LYS LYS LYS B B 59 59 | . 0.1169 0.1185 0.1314 0.0008 0.0187 -   |
| 0.0091 | 1 . |     |                         |                                          |
| 3761   | CB  | CB  | . LYS LYS LYS B B 59 59 | . 0.1302 0.1244 0.1587 -0.0023 0.0286 -  |
| 0.0043 | 1 . |     |                         |                                          |
| 3762   | CG  | CG  | . LYS LYS LYS B B 59 59 | . 0.1294 0.1655 0.2253 -0.0056 0.0560    |
| 0.0022 | 1 . |     |                         |                                          |
| 3763   | CD  | CD  | . LYS LYS LYS B B 59 59 | . 0.2128 0.2251 0.3361 0.0538 0.0474     |
| 0.0851 | 1 . |     |                         |                                          |
| 3764   | CE  | CE  | . LYS LYS LYS B B 59 59 | . 0.2312 0.3557 0.3249 -0.0031 0.0523    |
| 0.1053 | 1 . |     |                         |                                          |
| 3765   | NZ  | NZ  | . LYS LYS LYS B B 59 59 | . 0.3293 0.4103 0.3845 0.0747 0.0068     |
| 0.1105 | 1 . |     |                         |                                          |
| 3766   | C   | C   | . LYS LYS LYS B B 59 59 | . 0.1174 0.1070 0.1102 -0.0016 0.0036 -  |
| 0.0065 | 1 . |     |                         |                                          |
| 3767   | O   | O   | . LYS LYS LYS B B 59 59 | . 0.1284 0.1189 0.1288 0.0063 0.0053 -   |
| 0.0083 | 1 . |     |                         |                                          |
| 3768   | N   | N   | . GLY GLY GLY B B 60 60 | . 0.1060 0.1101 0.0977 0.0091 0.0176     |
| 0.0123 | 1 . |     |                         |                                          |
| 3769   | CA  | CA  | . GLY GLY GLY B B 60 60 | . 0.0969 0.1220 0.0953 -0.0162 -0.0001   |
| 0.0073 | 1 . |     |                         |                                          |
| 3770   | C   | C   | . GLY GLY GLY B B 60 60 | . 0.1169 0.1194 0.1150 0.0020 0.0024     |
| 0.0002 | 1 . |     |                         |                                          |
| 3771   | O   | O   | . GLY GLY GLY B B 60 60 | . 0.1488 0.0953 0.1247 -0.0010 0.0014    |
| 0.0026 | 1 . |     |                         |                                          |

|        |     |     |                           |        |        |        |         |         |   |
|--------|-----|-----|---------------------------|--------|--------|--------|---------|---------|---|
| 3772   | N   | N   | . VAL VAL VAL B B 61 61 . | 0.1099 | 0.0975 | 0.0882 | 0.0014  | 0.0063  | - |
| 0.0123 | 1   | .   |                           |        |        |        |         |         |   |
| 3773   | CA  | CA  | . VAL VAL VAL B B 61 61 . | 0.1234 | 0.1093 | 0.0961 | 0.0052  | 0.0094  | - |
| 0.0050 | 1   | .   |                           |        |        |        |         |         |   |
| 3774   | CB  | CB  | . VAL VAL VAL B B 61 61 . | 0.1091 | 0.0947 | 0.0956 | 0.0105  | 0.0014  |   |
| 0.0049 | 1   | .   |                           |        |        |        |         |         |   |
| 3775   | CG1 | CG1 | . VAL VAL VAL B B 61 61 . | 0.1205 | 0.1203 | 0.1065 | -0.0030 | 0.0252  |   |
| 0.0251 | 1   | .   |                           |        |        |        |         |         |   |
| 3776   | CG2 | CG2 | . VAL VAL VAL B B 61 61 . | 0.0834 | 0.0852 | 0.0749 | 0.0094  | -0.0048 |   |
| 0.0128 | 1   | .   |                           |        |        |        |         |         |   |
| 3777   | C   | C   | . VAL VAL VAL B B 61 61 . | 0.1326 | 0.1120 | 0.1259 | 0.0162  | -0.0030 | - |
| 0.0152 | 1   | .   |                           |        |        |        |         |         |   |
| 3778   | O   | O   | . VAL VAL VAL B B 61 61 . | 0.1225 | 0.1067 | 0.1138 | 0.0099  | 0.0189  | - |
| 0.0116 | 1   | .   |                           |        |        |        |         |         |   |
| 3779   | N   | N   | . LEU LEU LEU B B 62 62 . | 0.1561 | 0.1040 | 0.1081 | 0.0330  | -0.0039 | - |
| 0.0032 | 1   | .   |                           |        |        |        |         |         |   |
| 3780   | CA  | CA  | . LEU LEU LEU B B 62 62 . | 0.1239 | 0.1305 | 0.1258 | 0.0135  | -0.0170 | - |
| 0.0096 | 1   | .   |                           |        |        |        |         |         |   |
| 3781   | CB  | CB  | . LEU LEU LEU B B 62 62 . | 0.1242 | 0.1560 | 0.1072 | 0.0231  | -0.0450 | - |
| 0.0140 | 1   | .   |                           |        |        |        |         |         |   |
| 3782   | CG  | CG  | . LEU LEU LEU B B 62 62 . | 0.1516 | 0.1917 | 0.1834 | 0.0485  | -0.0439 | - |
| 0.0344 | 1   | .   |                           |        |        |        |         |         |   |
| 3783   | CD1 | CD1 | . LEU LEU LEU B B 62 62 . | 0.1657 | 0.2381 | 0.1523 | 0.0211  | -0.0483 | - |
| 0.0686 | 1   | .   |                           |        |        |        |         |         |   |
| 3784   | CD2 | CD2 | . LEU LEU LEU B B 62 62 . | 0.1006 | 0.2346 | 0.1627 | 0.0394  | 0.0569  |   |
| 0.0149 | 1   | .   |                           |        |        |        |         |         |   |
| 3785   | C   | C   | . LEU LEU LEU B B 62 62 . | 0.1324 | 0.1218 | 0.1299 | 0.0144  | -0.0176 |   |
| 0.0024 | 1   | .   |                           |        |        |        |         |         |   |
| 3786   | O   | O   | . LEU LEU LEU B B 62 62 . | 0.1595 | 0.1476 | 0.1509 | 0.0125  | 0.0000  | - |
| 0.0088 | 1   | .   |                           |        |        |        |         |         |   |
| 3787   | N   | N   | . LYS LYS LYS B B 63 63 . | 0.1453 | 0.1277 | 0.1221 | 0.0157  | -0.0135 | - |
| 0.0114 | 1   | .   |                           |        |        |        |         |         |   |
| 3788   | CA  | CA  | . LYS LYS LYS B B 63 63 . | 0.1461 | 0.1343 | 0.1344 | 0.0066  | -0.0009 | - |
| 0.0080 | 1   | .   |                           |        |        |        |         |         |   |
| 3789   | CB  | CB  | . LYS LYS LYS B B 63 63 . | 0.1386 | 0.1043 | 0.1465 | -0.0014 | 0.0110  | - |
| 0.0127 | 1   | .   |                           |        |        |        |         |         |   |
| 3790   | CG  | CG  | . LYS LYS LYS B B 63 63 . | 0.1499 | 0.1202 | 0.1386 | 0.0079  | 0.0221  | - |
| 0.0128 | 1   | .   |                           |        |        |        |         |         |   |
| 3791   | CD  | CD  | . LYS LYS LYS B B 63 63 . | 0.1915 | 0.1268 | 0.1565 | -0.0095 | 0.0122  |   |
| 0.0069 | 1   | .   |                           |        |        |        |         |         |   |
| 3792   | CE  | CE  | . LYS LYS LYS B B 63 63 . | 0.2395 | 0.1539 | 0.1588 | -0.0351 | 0.0087  | - |
| 0.0079 | 1   | .   |                           |        |        |        |         |         |   |
| 3793   | NZ  | NZ  | . LYS LYS LYS B B 63 63 . | 0.2925 | 0.1466 | 0.2665 | 0.0263  | 0.0362  | - |
| 0.0234 | 1   | .   |                           |        |        |        |         |         |   |
| 3794   | C   | C   | . LYS LYS LYS B B 63 63 . | 0.1438 | 0.1325 | 0.1288 | 0.0080  | -0.0042 |   |
| 0.0025 | 1   | .   |                           |        |        |        |         |         |   |
| 3795   | O   | O   | . LYS LYS LYS B B 63 63 . | 0.1316 | 0.1371 | 0.1223 | 0.0013  | -0.0053 | - |
| 0.0103 | 1   | .   |                           |        |        |        |         |         |   |
| 3796   | N   | N   | . ALA ALA ALA B B 64 64 . | 0.1471 | 0.1155 | 0.0972 | 0.0228  | 0.0172  |   |
| 0.0077 | 1   | .   |                           |        |        |        |         |         |   |
| 3797   | CA  | CA  | . ALA ALA ALA B B 64 64 . | 0.1180 | 0.1303 | 0.1052 | 0.0304  | 0.0069  |   |
| 0.0085 | 1   | .   |                           |        |        |        |         |         |   |
| 3798   | CB  | CB  | . ALA ALA ALA B B 64 64 . | 0.1204 | 0.1479 | 0.0782 | 0.0464  | 0.0013  | - |
| 0.0101 | 1   | .   |                           |        |        |        |         |         |   |
| 3799   | C   | C   | . ALA ALA ALA B B 64 64 . | 0.1211 | 0.1351 | 0.1289 | 0.0177  | 0.0073  | - |
| 0.0031 | 1   | .   |                           |        |        |        |         |         |   |
| 3800   | O   | O   | . ALA ALA ALA B B 64 64 . | 0.1390 | 0.1504 | 0.1148 | 0.0028  | -0.0206 | - |
| 0.0120 | 1   | .   |                           |        |        |        |         |         |   |
| 3801   | N   | N   | . VAL VAL VAL B B 65 65 . | 0.1065 | 0.1204 | 0.0985 | 0.0326  | 0.0248  | - |
| 0.0203 | 1   | .   |                           |        |        |        |         |         |   |





|        |     |     |                           |        |        |        |         |         |   |
|--------|-----|-----|---------------------------|--------|--------|--------|---------|---------|---|
| 3832   | C   | C   | . ILE ILE ILE B B 68 68 . | 0.1334 | 0.1455 | 0.1597 | 0.0329  | -0.0033 | - |
| 0.0087 | 1   | .   |                           |        |        |        |         |         |   |
| 3833   | O   | O   | . ILE ILE ILE B B 68 68 . | 0.1109 | 0.1868 | 0.1690 | 0.0249  | 0.0118  | - |
| 0.0175 | 1   | .   |                           |        |        |        |         |         |   |
| 3834   | N   | N   | . ASN ASN ASN B B 69 69 . | 0.1172 | 0.1600 | 0.1463 | 0.0496  | 0.0152  | - |
| 0.0042 | 1   | .   |                           |        |        |        |         |         |   |
| 3835   | CA  | CA  | . ASN ASN ASN B B 69 69 . | 0.1374 | 0.1623 | 0.1610 | 0.0459  | 0.0079  |   |
| 0.0082 | 1   | .   |                           |        |        |        |         |         |   |
| 3836   | CB  | CB  | . ASN ASN ASN B B 69 69 . | 0.1177 | 0.1411 | 0.1495 | 0.0535  | 0.0000  | - |
| 0.0001 | 1   | .   |                           |        |        |        |         |         |   |
| 3837   | CG  | CG  | . ASN ASN ASN B B 69 69 . | 0.1059 | 0.1064 | 0.1209 | 0.0498  | -0.0120 |   |
| 0.0190 | 1   | .   |                           |        |        |        |         |         |   |
| 3838   | OD1 | OD1 | . ASN ASN ASN B B 69 69 . | 0.0968 | 0.1598 | 0.1541 | 0.0515  | -0.0164 |   |
| 0.0219 | 1   | .   |                           |        |        |        |         |         |   |
| 3839   | ND2 | ND2 | . ASN ASN ASN B B 69 69 . | 0.0956 | 0.1888 | 0.1371 | -0.0144 | 0.0079  |   |
| 0.0258 | 1   | .   |                           |        |        |        |         |         |   |
| 3840   | C   | C   | . ASN ASN ASN B B 69 69 . | 0.1210 | 0.1763 | 0.1735 | 0.0358  | 0.0181  |   |
| 0.0016 | 1   | .   |                           |        |        |        |         |         |   |
| 3841   | O   | O   | . ASN ASN ASN B B 69 69 . | 0.1386 | 0.2174 | 0.1954 | 0.0372  | 0.0212  |   |
| 0.0109 | 1   | .   |                           |        |        |        |         |         |   |
| 3842   | N   | N   | . SER SER SER B B 70 70 . | 0.1385 | 0.2020 | 0.1778 | 0.0607  | 0.0190  | - |
| 0.0153 | 1   | .   |                           |        |        |        |         |         |   |
| 3843   | CA  | CA  | . SER SER SER B B 70 70 . | 0.1671 | 0.2121 | 0.1918 | 0.0537  | 0.0061  | - |
| 0.0142 | 1   | .   |                           |        |        |        |         |         |   |
| 3844   | CB  | CB  | . SER SER SER B B 70 70 . | 0.1720 | 0.2250 | 0.2185 | 0.0584  | -0.0105 | - |
| 0.0361 | 1   | .   |                           |        |        |        |         |         |   |
| 3845   | OG  | OG  | . SER SER SER B B 70 70 . | 0.2661 | 0.3041 | 0.2419 | 0.0509  | 0.0126  | - |
| 0.0192 | 1   | .   |                           |        |        |        |         |         |   |
| 3846   | C   | C   | . SER SER SER B B 70 70 . | 0.1537 | 0.2175 | 0.1850 | 0.0443  | 0.0069  | - |
| 0.0139 | 1   | .   |                           |        |        |        |         |         |   |
| 3847   | O   | O   | . SER SER SER B B 70 70 . | 0.1584 | 0.2258 | 0.2064 | 0.0538  | 0.0246  | - |
| 0.0268 | 1   | .   |                           |        |        |        |         |         |   |
| 3848   | N   | N   | . THR THR THR B B 71 71 . | 0.1333 | 0.1926 | 0.1716 | 0.0394  | 0.0109  | - |
| 0.0183 | 1   | .   |                           |        |        |        |         |         |   |
| 3849   | CA  | CA  | . THR THR THR B B 71 71 . | 0.1534 | 0.1815 | 0.1694 | 0.0339  | 0.0008  | - |
| 0.0034 | 1   | .   |                           |        |        |        |         |         |   |
| 3850   | CB  | CB  | . THR THR THR B B 71 71 . | 0.1241 | 0.1985 | 0.1827 | 0.0255  | -0.0046 | - |
| 0.0105 | 1   | .   |                           |        |        |        |         |         |   |
| 3851   | OG1 | OG1 | . THR THR THR B B 71 71 . | 0.1291 | 0.1899 | 0.2151 | 0.0395  | 0.0074  | - |
| 0.0236 | 1   | .   |                           |        |        |        |         |         |   |
| 3852   | CG2 | CG2 | . THR THR THR B B 71 71 . | 0.1727 | 0.2273 | 0.2020 | 0.0176  | -0.0395 | - |
| 0.0116 | 1   | .   |                           |        |        |        |         |         |   |
| 3853   | C   | C   | . THR THR THR B B 71 71 . | 0.1453 | 0.1774 | 0.1685 | 0.0250  | 0.0074  |   |
| 0.0074 | 1   | .   |                           |        |        |        |         |         |   |
| 3854   | O   | O   | . THR THR THR B B 71 71 . | 0.1291 | 0.1934 | 0.1690 | 0.0312  | 0.0002  |   |
| 0.0170 | 1   | .   |                           |        |        |        |         |         |   |
| 3855   | N   | N   | . ILE ILE ILE B B 72 72 . | 0.1143 | 0.1570 | 0.1630 | 0.0320  | 0.0061  |   |
| 0.0272 | 1   | .   |                           |        |        |        |         |         |   |
| 3856   | CA  | CA  | . ILE ILE ILE B B 72 72 . | 0.1089 | 0.1194 | 0.1259 | 0.0294  | 0.0012  |   |
| 0.0059 | 1   | .   |                           |        |        |        |         |         |   |
| 3857   | CB  | CB  | . ILE ILE ILE B B 72 72 . | 0.1066 | 0.1239 | 0.1333 | 0.0171  | 0.0124  |   |
| 0.0115 | 1   | .   |                           |        |        |        |         |         |   |
| 3858   | CG1 | CG1 | . ILE ILE ILE B B 72 72 . | 0.1041 | 0.1228 | 0.1641 | 0.0747  | 0.0394  |   |
| 0.0021 | 1   | .   |                           |        |        |        |         |         |   |
| 3859   | CD1 | CD1 | . ILE ILE ILE B B 72 72 . | 0.0910 | 0.1809 | 0.1634 | 0.0900  | 0.0552  |   |
| 0.0391 | 1   | .   |                           |        |        |        |         |         |   |
| 3860   | CG2 | CG2 | . ILE ILE ILE B B 72 72 . | 0.1301 | 0.1755 | 0.1568 | 0.0244  | -0.0314 |   |
| 0.0059 | 1   | .   |                           |        |        |        |         |         |   |
| 3861   | C   | C   | . ILE ILE ILE B B 72 72 . | 0.1218 | 0.1472 | 0.1522 | 0.0231  | -0.0029 | - |
| 0.0068 | 1   | .   |                           |        |        |        |         |         |   |

|        |     |     |                           |        |        |        |        |         |   |
|--------|-----|-----|---------------------------|--------|--------|--------|--------|---------|---|
| 3862   | O   | O   | . ILE ILE ILE B B 72 72 . | 0.1415 | 0.1789 | 0.1776 | 0.0157 | -0.0219 |   |
| 0.0082 | 1   | .   |                           |        |        |        |        |         |   |
| 3863   | N   | N   | . ALA ALA ALA B B 73 73 . | 0.1111 | 0.1429 | 0.1529 | 0.0245 | -0.0098 | - |
| 0.0001 | 1   | .   |                           |        |        |        |        |         |   |
| 3864   | CA  | CA  | . ALA ALA ALA B B 73 73 . | 0.0999 | 0.1746 | 0.1346 | 0.0222 | -0.0025 |   |
| 0.0128 | 1   | .   |                           |        |        |        |        |         |   |
| 3865   | CB  | CB  | . ALA ALA ALA B B 73 73 . | 0.1427 | 0.1744 | 0.1872 | 0.0250 | -0.0210 |   |
| 0.0174 | 1   | .   |                           |        |        |        |        |         |   |
| 3866   | C   | C   | . ALA ALA ALA B B 73 73 . | 0.1263 | 0.1815 | 0.1698 | 0.0260 | -0.0168 | - |
| 0.0003 | 1   | .   |                           |        |        |        |        |         |   |
| 3867   | O   | O   | . ALA ALA ALA B B 73 73 . | 0.0998 | 0.1842 | 0.2077 | 0.0170 | -0.0090 |   |
| 0.0188 | 1   | .   |                           |        |        |        |        |         |   |
| 3868   | N   | N   | . PRO PRO PRO B B 74 74 . | 0.1225 | 0.1737 | 0.1723 | 0.0273 | -0.0014 |   |
| 0.0037 | 1   | .   |                           |        |        |        |        |         |   |
| 3869   | CA  | CA  | . PRO PRO PRO B B 74 74 . | 0.1341 | 0.1802 | 0.1803 | 0.0366 | -0.0143 | - |
| 0.0017 | 1   | .   |                           |        |        |        |        |         |   |
| 3870   | CB  | CB  | . PRO PRO PRO B B 74 74 . | 0.1295 | 0.1890 | 0.1622 | 0.0330 | -0.0284 | - |
| 0.0119 | 1   | .   |                           |        |        |        |        |         |   |
| 3871   | CG  | CG  | . PRO PRO PRO B B 74 74 . | 0.1590 | 0.1883 | 0.2022 | 0.0316 | 0.0194  | - |
| 0.0120 | 1   | .   |                           |        |        |        |        |         |   |
| 3872   | CD  | CD  | . PRO PRO PRO B B 74 74 . | 0.1115 | 0.1734 | 0.1773 | 0.0427 | -0.0115 | - |
| 0.0081 | 1   | .   |                           |        |        |        |        |         |   |
| 3873   | C   | C   | . PRO PRO PRO B B 74 74 . | 0.1495 | 0.1726 | 0.1549 | 0.0195 | 0.0001  |   |
| 0.0023 | 1   | .   |                           |        |        |        |        |         |   |
| 3874   | O   | O   | . PRO PRO PRO B B 74 74 . | 0.1757 | 0.1766 | 0.1906 | 0.0311 | -0.0256 |   |
| 0.0056 | 1   | .   |                           |        |        |        |        |         |   |
| 3875   | N   | N   | . ALA ALA ALA B B 75 75 . | 0.1441 | 0.1364 | 0.1706 | 0.0206 | 0.0070  | - |
| 0.0002 | 1   | .   |                           |        |        |        |        |         |   |
| 3876   | CA  | CA  | . ALA ALA ALA B B 75 75 . | 0.1435 | 0.1561 | 0.1608 | 0.0217 | 0.0064  | - |
| 0.0014 | 1   | .   |                           |        |        |        |        |         |   |
| 3877   | CB  | CB  | . ALA ALA ALA B B 75 75 . | 0.1500 | 0.1573 | 0.1582 | 0.0155 | 0.0021  |   |
| 0.0275 | 1   | .   |                           |        |        |        |        |         |   |
| 3878   | C   | C   | . ALA ALA ALA B B 75 75 . | 0.1472 | 0.1619 | 0.1724 | 0.0246 | -0.0031 |   |
| 0.0048 | 1   | .   |                           |        |        |        |        |         |   |
| 3879   | O   | O   | . ALA ALA ALA B B 75 75 . | 0.1380 | 0.1655 | 0.1840 | 0.0461 | -0.0057 | - |
| 0.0030 | 1   | .   |                           |        |        |        |        |         |   |
| 3880   | N   | N   | . LEU LEU LEU B B 76 76 . | 0.1249 | 0.1496 | 0.1542 | 0.0437 | -0.0192 |   |
| 0.0128 | 1   | .   |                           |        |        |        |        |         |   |
| 3881   | CA  | CA  | . LEU LEU LEU B B 76 76 . | 0.1230 | 0.1487 | 0.1735 | 0.0416 | -0.0033 |   |
| 0.0076 | 1   | .   |                           |        |        |        |        |         |   |
| 3882   | CB  | CB  | . LEU LEU LEU B B 76 76 . | 0.1204 | 0.1496 | 0.1744 | 0.0381 | -0.0088 |   |
| 0.0172 | 1   | .   |                           |        |        |        |        |         |   |
| 3883   | CG  | CG  | . LEU LEU LEU B B 76 76 . | 0.1723 | 0.2132 | 0.2188 | 0.0349 | 0.0027  |   |
| 0.0191 | 1   | .   |                           |        |        |        |        |         |   |
| 3884   | CD1 | CD1 | . LEU LEU LEU B B 76 76 . | 0.0998 | 0.1891 | 0.2456 | 0.0394 | 0.0021  |   |
| 0.0360 | 1   | .   |                           |        |        |        |        |         |   |
| 3885   | CD2 | CD2 | . LEU LEU LEU B B 76 76 . | 0.0767 | 0.2925 | 0.2356 | 0.0511 | 0.0048  |   |
| 0.0685 | 1   | .   |                           |        |        |        |        |         |   |
| 3886   | C   | C   | . LEU LEU LEU B B 76 76 . | 0.1274 | 0.1526 | 0.1795 | 0.0334 | -0.0098 |   |
| 0.0008 | 1   | .   |                           |        |        |        |        |         |   |
| 3887   | O   | O   | . LEU LEU LEU B B 76 76 . | 0.1396 | 0.1816 | 0.1999 | 0.0133 | -0.0157 |   |
| 0.0134 | 1   | .   |                           |        |        |        |        |         |   |
| 3888   | N   | N   | . ILE ILE ILE B B 77 77 . | 0.1073 | 0.1737 | 0.1948 | 0.0295 | 0.0047  | - |
| 0.0003 | 1   | .   |                           |        |        |        |        |         |   |
| 3889   | CA  | CA  | . ILE ILE ILE B B 77 77 . | 0.1422 | 0.1851 | 0.2017 | 0.0281 | -0.0033 |   |
| 0.0240 | 1   | .   |                           |        |        |        |        |         |   |
| 3890   | CB  | CB  | . ILE ILE ILE B B 77 77 . | 0.1218 | 0.1825 | 0.2054 | 0.0227 | 0.0024  |   |
| 0.0098 | 1   | .   |                           |        |        |        |        |         |   |
| 3891   | CG1 | CG1 | . ILE ILE ILE B B 77 77 . | 0.1445 | 0.1885 | 0.2178 | 0.0367 | 0.0006  |   |
| 0.0053 | 1   | .   |                           |        |        |        |        |         |   |

|        |     |     |                         |                                         |
|--------|-----|-----|-------------------------|-----------------------------------------|
| 3892   | CD1 | CD1 | . ILE ILE ILE B B 77 77 | . 0.2007 0.2306 0.2282 0.0391 -0.0045 - |
| 0.0343 | 1 . |     |                         |                                         |
| 3893   | CG2 | CG2 | . ILE ILE ILE B B 77 77 | . 0.1925 0.2019 0.1843 0.0147 0.0011    |
| 0.0626 | 1 . |     |                         |                                         |
| 3894   | C   | C   | . ILE ILE ILE B B 77 77 | . 0.1517 0.1914 0.2274 0.0165 0.0126    |
| 0.0028 | 1 . |     |                         |                                         |
| 3895   | O   | O   | . ILE ILE ILE B B 77 77 | . 0.0956 0.1652 0.2260 0.0104 0.0024    |
| 0.0203 | 1 . |     |                         |                                         |
| 3896   | N   | N   | . SER SER SER B B 78 78 | . 0.1696 0.1668 0.2304 0.0196 0.0007    |
| 0.0277 | 1 . |     |                         |                                         |
| 3897   | CA  | CA  | . SER SER SER B B 78 78 | . 0.1770 0.1958 0.2536 0.0170 0.0107    |
| 0.0078 | 1 . |     |                         |                                         |
| 3898   | CB  | CB  | . SER SER SER B B 78 78 | . 0.2214 0.2314 0.2592 0.0308 -0.0004 - |
| 0.0240 | 1 . |     |                         |                                         |
| 3899   | OG  | OG  | . SER SER SER B B 78 78 | . 0.2325 0.3480 0.2878 0.0363 0.0086 -  |
| 0.0129 | 1 . |     |                         |                                         |
| 3900   | C   | C   | . SER SER SER B B 78 78 | . 0.1922 0.1699 0.2396 0.0119 0.0074 -  |
| 0.0047 | 1 . |     |                         |                                         |
| 3901   | O   | O   | . SER SER SER B B 78 78 | . 0.2148 0.1920 0.2590 0.0144 -0.0211 - |
| 0.0093 | 1 . |     |                         |                                         |
| 3902   | N   | N   | . SER SER SER B B 79 79 | . 0.1917 0.1892 0.2408 0.0257 -0.0002 - |
| 0.0065 | 1 . |     |                         |                                         |
| 3903   | CA  | CA  | . SER SER SER B B 79 79 | . 0.1983 0.1979 0.2387 0.0235 0.0074    |
| 0.0016 | 1 . |     |                         |                                         |
| 3904   | CB  | CB  | . SER SER SER B B 79 79 | . 0.1664 0.1897 0.2276 0.0118 0.0121    |
| 0.0040 | 1 . |     |                         |                                         |
| 3905   | OG  | OG  | . SER SER SER B B 79 79 | . 0.1753 0.2316 0.2361 0.0263 0.0185    |
| 0.0113 | 1 . |     |                         |                                         |
| 3906   | C   | C   | . SER SER SER B B 79 79 | . 0.1983 0.2134 0.2464 0.0178 -0.0033   |
| 0.0048 | 1 . |     |                         |                                         |
| 3907   | O   | O   | . SER SER SER B B 79 79 | . 0.2320 0.2312 0.2965 0.0169 -0.0072 - |
| 0.0029 | 1 . |     |                         |                                         |
| 3908   | N   | N   | . GLY GLY GLY B B 80 80 | . 0.1773 0.2147 0.2536 0.0193 -0.0139   |
| 0.0151 | 1 . |     |                         |                                         |
| 3909   | CA  | CA  | . GLY GLY GLY B B 80 80 | . 0.2002 0.2192 0.2436 0.0110 -0.0107   |
| 0.0131 | 1 . |     |                         |                                         |
| 3910   | C   | C   | . GLY GLY GLY B B 80 80 | . 0.2076 0.2127 0.2410 0.0032 -0.0162   |
| 0.0082 | 1 . |     |                         |                                         |
| 3911   | O   | O   | . GLY GLY GLY B B 80 80 | . 0.2153 0.2400 0.2639 -0.0071 -0.0069  |
| 0.0065 | 1 . |     |                         |                                         |
| 3912   | N   | N   | . LEU LEU LEU B B 81 81 | . 0.1808 0.2007 0.2282 0.0130 -0.0276   |
| 0.0159 | 1 . |     |                         |                                         |
| 3913   | CA  | CA  | . LEU LEU LEU B B 81 81 | . 0.1920 0.1980 0.2473 0.0165 -0.0268   |
| 0.0134 | 1 . |     |                         |                                         |
| 3914   | CB  | CB  | . LEU LEU LEU B B 81 81 | . 0.2132 0.2280 0.2356 0.0365 -0.0238   |
| 0.0264 | 1 . |     |                         |                                         |
| 3915   | CG  | CG  | . LEU LEU LEU B B 81 81 | . 0.2082 0.1895 0.2485 0.0463 -0.0395   |
| 0.0029 | 1 . |     |                         |                                         |
| 3916   | CD1 | CD1 | . LEU LEU LEU B B 81 81 | . 0.2185 0.2182 0.2499 0.0391 -0.0323   |
| 0.0027 | 1 . |     |                         |                                         |
| 3917   | CD2 | CD2 | . LEU LEU LEU B B 81 81 | . 0.2500 0.2043 0.2274 0.0366 -0.0487   |
| 0.0253 | 1 . |     |                         |                                         |
| 3918   | C   | C   | . LEU LEU LEU B B 81 81 | . 0.2076 0.2041 0.2419 0.0196 -0.0176   |
| 0.0157 | 1 . |     |                         |                                         |
| 3919   | O   | O   | . LEU LEU LEU B B 81 81 | . 0.2275 0.1999 0.2500 0.0089 -0.0213   |
| 0.0208 | 1 . |     |                         |                                         |
| 3920   | N   | N   | . SER SER SER B B 82 82 | . 0.1876 0.1876 0.2577 0.0048 -0.0161   |
| 0.0137 | 1 . |     |                         |                                         |
| 3921   | CA  | CA  | . SER SER SER B B 82 82 | . 0.1961 0.1873 0.2545 -0.0010 -0.0114  |
| 0.0088 | 1 . |     |                         |                                         |





|        |     |     |                         |                                         |
|--------|-----|-----|-------------------------|-----------------------------------------|
| 3982   | C   | C   | . LEU LEU LEU B B 89 89 | . 0.1374 0.1455 0.1603 0.0031 -0.0256   |
| 0.0119 | 1   | .   |                         |                                         |
| 3983   | O   | O   | . LEU LEU LEU B B 89 89 | . 0.1378 0.1351 0.1545 0.0079 -0.0341   |
| 0.0142 | 1   | .   |                         |                                         |
| 3984   | N   | N   | . ASP ASP ASP B B 90 90 | . 0.1309 0.1408 0.1303 -0.0025 -0.0233  |
| 0.0075 | 1   | .   |                         |                                         |
| 3985   | CA  | CA  | . ASP ASP ASP B B 90 90 | . 0.1436 0.1403 0.1415 -0.0078 -0.0118  |
| 0.0052 | 1   | .   |                         |                                         |
| 3986   | CB  | CB  | . ASP ASP ASP B B 90 90 | . 0.1756 0.1589 0.1889 0.0270 -0.0110   |
| 0.0305 | 1   | .   |                         |                                         |
| 3987   | CG  | CG  | . ASP ASP ASP B B 90 90 | . 0.1710 0.1686 0.1902 0.0201 -0.0096   |
| 0.0200 | 1   | .   |                         |                                         |
| 3988   | OD1 | OD1 | . ASP ASP ASP B B 90 90 | . 0.1889 0.1546 0.1765 0.0153 0.0023    |
| 0.0002 | 1   | .   |                         |                                         |
| 3989   | OD2 | OD2 | . ASP ASP ASP B B 90 90 | . 0.1741 0.1713 0.1751 0.0238 -0.0011   |
| 0.0212 | 1   | .   |                         |                                         |
| 3990   | C   | C   | . ASP ASP ASP B B 90 90 | . 0.1569 0.1483 0.1633 0.0029 -0.0219 - |
| 0.0037 | 1   | .   |                         |                                         |
| 3991   | O   | O   | . ASP ASP ASP B B 90 90 | . 0.1852 0.1557 0.1634 -0.0116 -0.0192  |
| 0.0105 | 1   | .   |                         |                                         |
| 3992   | N   | N   | . ASN ASN ASN B B 91 91 | . 0.1569 0.1546 0.1953 0.0079 -0.0268   |
| 0.0082 | 1   | .   |                         |                                         |
| 3993   | CA  | CA  | . ASN ASN ASN B B 91 91 | . 0.1853 0.1850 0.2005 0.0090 -0.0242   |
| 0.0024 | 1   | .   |                         |                                         |
| 3994   | CB  | CB  | . ASN ASN ASN B B 91 91 | . 0.2167 0.2440 0.2431 0.0041 -0.0299   |
| 0.0088 | 1   | .   |                         |                                         |
| 3995   | CG  | CG  | . ASN ASN ASN B B 91 91 | . 0.2873 0.2723 0.2106 -0.0106 -0.0358  |
| 0.0469 | 1   | .   |                         |                                         |
| 3996   | OD1 | OD1 | . ASN ASN ASN B B 91 91 | . 0.4482 0.3256 0.3401 -0.0395 -0.0184  |
| 0.0213 | 1   | .   |                         |                                         |
| 3997   | ND2 | ND2 | . ASN ASN ASN B B 91 91 | . 0.3301 0.4379 0.2142 -0.0465 -0.0214  |
| 0.0487 | 1   | .   |                         |                                         |
| 3998   | C   | C   | . ASN ASN ASN B B 91 91 | . 0.1782 0.1847 0.1975 0.0010 -0.0135   |
| 0.0032 | 1   | .   |                         |                                         |
| 3999   | O   | O   | . ASN ASN ASN B B 91 91 | . 0.1551 0.1937 0.2089 0.0228 -0.0175 - |
| 0.0056 | 1   | .   |                         |                                         |
| 4000   | N   | N   | . LEU LEU LEU B B 92 92 | . 0.1654 0.2003 0.1784 0.0122 -0.0251 - |
| 0.0104 | 1   | .   |                         |                                         |
| 4001   | CA  | CA  | . LEU LEU LEU B B 92 92 | . 0.1344 0.1842 0.1836 0.0229 -0.0119 - |
| 0.0055 | 1   | .   |                         |                                         |
| 4002   | CB  | CB  | . LEU LEU LEU B B 92 92 | . 0.1838 0.1934 0.1909 0.0226 -0.0100   |
| 0.0121 | 1   | .   |                         |                                         |
| 4003   | CG  | CG  | . LEU LEU LEU B B 92 92 | . 0.1794 0.1596 0.2247 0.0387 0.0010    |
| 0.0108 | 1   | .   |                         |                                         |
| 4004   | CD1 | CD1 | . LEU LEU LEU B B 92 92 | . 0.1345 0.1316 0.2429 0.0600 -0.0257 - |
| 0.0102 | 1   | .   |                         |                                         |
| 4005   | CD2 | CD2 | . LEU LEU LEU B B 92 92 | . 0.1512 0.1541 0.2458 0.0278 0.0212    |
| 0.0245 | 1   | .   |                         |                                         |
| 4006   | C   | C   | . LEU LEU LEU B B 92 92 | . 0.1400 0.1544 0.1790 0.0316 -0.0026 - |
| 0.0160 | 1   | .   |                         |                                         |
| 4007   | O   | O   | . LEU LEU LEU B B 92 92 | . 0.1466 0.1611 0.1847 0.0341 -0.0078 - |
| 0.0087 | 1   | .   |                         |                                         |
| 4008   | N   | N   | . MET MET MET B B 93 93 | . 0.1231 0.1537 0.1628 0.0288 -0.0280   |
| 0.0136 | 1   | .   |                         |                                         |
| 4009   | CA  | CA  | . MET MET MET B B 93 93 | . 0.1021 0.1190 0.1488 0.0353 -0.0132   |
| 0.0111 | 1   | .   |                         |                                         |
| 4010   | CB  | CB  | . MET MET MET B B 93 93 | . 0.0924 0.1521 0.1625 0.0501 -0.0064   |
| 0.0175 | 1   | .   |                         |                                         |
| 4011   | CG  | CG  | . MET MET MET B B 93 93 | . 0.1133 0.0943 0.1564 0.0439 0.0082    |
| 0.0000 | 1   | .   |                         |                                         |

|        |     |     |                         |                                          |
|--------|-----|-----|-------------------------|------------------------------------------|
| 4012   | SD  | SD  | . MET MET MET B B 93 93 | . 0.1404 0.1681 0.1429 0.0299 -0.0048    |
| 0.0066 | 1   | .   |                         |                                          |
| 4013   | CE  | CE  | . MET MET MET B B 93 93 | . 0.1103 0.1190 0.1296 0.0390 -0.0239 -  |
| 0.0354 | 1   | .   |                         |                                          |
| 4014   | C   | C   | . MET MET MET B B 93 93 | . 0.0946 0.1318 0.1360 0.0262 -0.0058    |
| 0.0031 | 1   | .   |                         |                                          |
| 4015   | O   | O   | . MET MET MET B B 93 93 | . 0.1132 0.1288 0.1554 0.0270 0.0065     |
| 0.0124 | 1   | .   |                         |                                          |
| 4016   | N   | N   | . LEU LEU LEU B B 94 94 | . 0.0950 0.1235 0.1249 0.0264 -0.0022    |
| 0.0218 | 1   | .   |                         |                                          |
| 4017   | CA  | CA  | . LEU LEU LEU B B 94 94 | . 0.1464 0.1461 0.1483 0.0350 -0.0023    |
| 0.0059 | 1   | .   |                         |                                          |
| 4018   | CB  | CB  | . LEU LEU LEU B B 94 94 | . 0.1599 0.1686 0.1361 0.0267 0.0200 -   |
| 0.0076 | 1   | .   |                         |                                          |
| 4019   | CG  | CG  | . LEU LEU LEU B B 94 94 | . 0.2337 0.2563 0.2016 0.0671 0.0058 -   |
| 0.0357 | 1   | .   |                         |                                          |
| 4020   | CD1 | CD1 | . LEU LEU LEU B B 94 94 | . 0.1824 0.2657 0.1661 0.0869 0.0624     |
| 0.0028 | 1   | .   |                         |                                          |
| 4021   | CD2 | CD2 | . LEU LEU LEU B B 94 94 | . 0.1760 0.3555 0.2681 0.0265 0.0005 -   |
| 0.0842 | 1   | .   |                         |                                          |
| 4022   | C   | C   | . LEU LEU LEU B B 94 94 | . 0.1517 0.1420 0.1563 0.0164 -0.0081    |
| 0.0067 | 1   | .   |                         |                                          |
| 4023   | O   | O   | . LEU LEU LEU B B 94 94 | . 0.1866 0.1160 0.1634 0.0226 -0.0354    |
| 0.0178 | 1   | .   |                         |                                          |
| 4024   | N   | N   | . GLU GLU GLU B B 95 95 | . 0.1713 0.1737 0.1729 0.0212 -0.0053    |
| 0.0072 | 1   | .   |                         |                                          |
| 4025   | CA  | CA  | . GLU GLU GLU B B 95 95 | . 0.1712 0.1698 0.1644 0.0212 0.0089 -   |
| 0.0101 | 1   | .   |                         |                                          |
| 4026   | CB  | CB  | . GLU GLU GLU B B 95 95 | . 0.1975 0.1996 0.1799 0.0211 -0.0077 -  |
| 0.0285 | 1   | .   |                         |                                          |
| 4027   | CG  | CG  | . GLU GLU GLU B B 95 95 | . 0.3188 0.3529 0.2854 0.0190 -0.0298 -  |
| 0.0317 | 1   | .   |                         |                                          |
| 4028   | CD  | CD  | . GLU GLU GLU B B 95 95 | . 0.4688 0.4674 0.4152 -0.0152 -0.0340   |
| 0.0343 | 1   | .   |                         |                                          |
| 4029   | OE1 | OE1 | . GLU GLU GLU B B 95 95 | . 0.5362 0.5973 0.5196 -0.0349 -0.0931   |
| 0.0123 | 1   | .   |                         |                                          |
| 4030   | OE2 | OE2 | . GLU GLU GLU B B 95 95 | . 0.5348 0.5232 0.4894 -0.0567 -0.0510 - |
| 0.0203 | 1   | .   |                         |                                          |
| 4031   | C   | C   | . GLU GLU GLU B B 95 95 | . 0.1548 0.1723 0.1728 0.0067 -0.0025 -  |
| 0.0022 | 1   | .   |                         |                                          |
| 4032   | O   | O   | . GLU GLU GLU B B 95 95 | . 0.1634 0.1737 0.1822 0.0387 -0.0071 -  |
| 0.0006 | 1   | .   |                         |                                          |
| 4033   | N   | N   | . LEU LEU LEU B B 96 96 | . 0.1475 0.1763 0.1748 0.0183 0.0147     |
| 0.0106 | 1   | .   |                         |                                          |
| 4034   | CA  | CA  | . LEU LEU LEU B B 96 96 | . 0.1464 0.1689 0.1671 0.0264 0.0003     |
| 0.0109 | 1   | .   |                         |                                          |
| 4035   | CB  | CB  | . LEU LEU LEU B B 96 96 | . 0.1500 0.1853 0.1933 0.0204 0.0208     |
| 0.0266 | 1   | .   |                         |                                          |
| 4036   | CG  | CG  | . LEU LEU LEU B B 96 96 | . 0.2228 0.2245 0.2722 0.0649 0.0286     |
| 0.0354 | 1   | .   |                         |                                          |
| 4037   | CD1 | CD1 | . LEU LEU LEU B B 96 96 | . 0.3070 0.2955 0.3431 0.0590 0.0227     |
| 0.0897 | 1   | .   |                         |                                          |
| 4038   | CD2 | CD2 | . LEU LEU LEU B B 96 96 | . 0.2219 0.3465 0.2162 0.1237 0.0479     |
| 0.0222 | 1   | .   |                         |                                          |
| 4039   | C   | C   | . LEU LEU LEU B B 96 96 | . 0.1651 0.1740 0.1759 0.0298 0.0008     |
| 0.0020 | 1   | .   |                         |                                          |
| 4040   | O   | O   | . LEU LEU LEU B B 96 96 | . 0.1556 0.1729 0.1909 0.0500 -0.0064    |
| 0.0005 | 1   | .   |                         |                                          |
| 4041   | N   | N   | . ASP ASP ASP B B 97 97 | . 0.1379 0.1704 0.1747 0.0209 0.0086     |
| 0.0058 | 1   | .   |                         |                                          |

|        |     |     |                           |                                          |
|--------|-----|-----|---------------------------|------------------------------------------|
| 4042   | CA  | CA  | . ASP ASP ASP B B 97 97   | . 0.1521 0.1318 0.1616 0.0145 0.0035     |
| 0.0196 | 1   | .   |                           |                                          |
| 4043   | CB  | CB  | . ASP ASP ASP B B 97 97   | . 0.1261 0.1324 0.1513 0.0182 0.0189     |
| 0.0219 | 1   | .   |                           |                                          |
| 4044   | CG  | CG  | . ASP ASP ASP B B 97 97   | . 0.1581 0.1678 0.1490 0.0253 0.0147     |
| 0.0084 | 1   | .   |                           |                                          |
| 4045   | OD1 | OD1 | . ASP ASP ASP B B 97 97   | . 0.1656 0.2144 0.1965 -0.0019 0.0493 -  |
| 0.0052 | 1   | .   |                           |                                          |
| 4046   | OD2 | OD2 | . ASP ASP ASP B B 97 97   | . 0.1945 0.1992 0.1759 0.0497 -0.0098    |
| 0.0329 | 1   | .   |                           |                                          |
| 4047   | C   | C   | . ASP ASP ASP B B 97 97   | . 0.1557 0.1491 0.1855 0.0255 -0.0077    |
| 0.0113 | 1   | .   |                           |                                          |
| 4048   | O   | O   | . ASP ASP ASP B B 97 97   | . 0.1546 0.1201 0.1835 0.0333 -0.0136    |
| 0.0009 | 1   | .   |                           |                                          |
| 4049   | N   | N   | . GLY GLY GLY B B 98 98   | . 0.1828 0.1538 0.1704 0.0281 -0.0158    |
| 0.0296 | 1   | .   |                           |                                          |
| 4050   | CA  | CA  | . GLY GLY GLY B B 98 98   | . 0.1736 0.1646 0.1856 0.0257 -0.0049    |
| 0.0452 | 1   | .   |                           |                                          |
| 4051   | C   | C   | . GLY GLY GLY B B 98 98   | . 0.1908 0.1762 0.1942 0.0245 0.0002     |
| 0.0399 | 1   | .   |                           |                                          |
| 4052   | O   | O   | . GLY GLY GLY B B 98 98   | . 0.1789 0.1872 0.2300 0.0431 0.0044     |
| 0.0535 | 1   | .   |                           |                                          |
| 4053   | N   | N   | . THR THR THR B B 99 99   | . 0.1754 0.1736 0.1700 0.0259 -0.0094    |
| 0.0357 | 1   | .   |                           |                                          |
| 4054   | CA  | CA  | . THR THR THR B B 99 99   | . 0.1719 0.1635 0.1946 0.0085 0.0005     |
| 0.0089 | 1   | .   |                           |                                          |
| 4055   | CB  | CB  | . THR THR THR B B 99 99   | . 0.1780 0.1676 0.1851 0.0005 -0.0053    |
| 0.0013 | 1   | .   |                           |                                          |
| 4056   | OG1 | OG1 | . THR THR THR B B 99 99   | . 0.1578 0.1585 0.1747 0.0182 0.0036     |
| 0.0018 | 1   | .   |                           |                                          |
| 4057   | CG2 | CG2 | . THR THR THR B B 99 99   | . 0.1445 0.1684 0.1795 0.0050 -0.0146 -  |
| 0.0060 | 1   | .   |                           |                                          |
| 4058   | C   | C   | . THR THR THR B B 99 99   | . 0.1934 0.1795 0.1963 -0.0004 0.0147    |
| 0.0097 | 1   | .   |                           |                                          |
| 4059   | O   | O   | . THR THR THR B B 99 99   | . 0.2178 0.1820 0.2324 0.0024 0.0509 -   |
| 0.0094 | 1   | .   |                           |                                          |
| 4060   | N   | N   | . GLU GLU GLU B B 100 100 | . 0.1928 0.1954 0.1918 0.0158 0.0067     |
| 0.0059 | 1   | .   |                           |                                          |
| 4061   | CA  | CA  | . GLU GLU GLU B B 100 100 | . 0.2056 0.2149 0.2225 0.0256 0.0160     |
| 0.0274 | 1   | .   |                           |                                          |
| 4062   | CB  | CB  | . GLU GLU GLU B B 100 100 | . 0.2258 0.2304 0.2348 0.0161 0.0461     |
| 0.0388 | 1   | .   |                           |                                          |
| 4063   | CG  | CG  | . GLU GLU GLU B B 100 100 | . 0.3731 0.3580 0.3322 0.0134 0.0295 -   |
| 0.0075 | 1   | .   |                           |                                          |
| 4064   | CD  | CD  | . GLU GLU GLU B B 100 100 | . 0.5515 0.4982 0.4527 -0.0088 -0.0439 - |
| 0.0141 | 1   | .   |                           |                                          |
| 4065   | OE1 | OE1 | . GLU GLU GLU B B 100 100 | . 0.6044 0.6224 0.5244 0.0575 -0.0679 -  |
| 0.0056 | 1   | .   |                           |                                          |
| 4066   | OE2 | OE2 | . GLU GLU GLU B B 100 100 | . 0.7037 0.5039 0.5109 0.0096 0.0043 -   |
| 0.0711 | 1   | .   |                           |                                          |
| 4067   | C   | C   | . GLU GLU GLU B B 100 100 | . 0.1803 0.1857 0.1821 0.0177 -0.0066    |
| 0.0391 | 1   | .   |                           |                                          |
| 4068   | O   | O   | . GLU GLU GLU B B 100 100 | . 0.1845 0.2183 0.2022 0.0165 -0.0319    |
| 0.0203 | 1   | .   |                           |                                          |
| 4069   | N   | N   | . ASN ASN ASN B B 101 101 | . 0.1724 0.1689 0.1503 0.0183 0.0093     |
| 0.0423 | 1   | .   |                           |                                          |
| 4070   | CA  | CA  | . ASN ASN ASN B B 101 101 | . 0.1619 0.1748 0.1547 0.0096 -0.0002    |
| 0.0405 | 1   | .   |                           |                                          |
| 4071   | CB  | CB  | . ASN ASN ASN B B 101 101 | . 0.2162 0.2145 0.1948 -0.0085 -0.0162   |
| 0.0397 | 1   | .   |                           |                                          |



|        |     |     |                             |        |        |        |         |         |   |
|--------|-----|-----|-----------------------------|--------|--------|--------|---------|---------|---|
| 4072   | CG  | CG  | . ASN ASN ASN B B 101 101 . | 0.3042 | 0.2884 | 0.3061 | -0.0046 | -0.0122 |   |
| 0.0371 | 1   | .   |                             |        |        |        |         |         |   |
| 4073   | OD1 | OD1 | . ASN ASN ASN B B 101 101 . | 0.3601 | 0.4945 | 0.4638 | -0.0558 | 0.0177  |   |
| 0.1012 | 1   | .   |                             |        |        |        |         |         |   |
| 4074   | ND2 | ND2 | . ASN ASN ASN B B 101 101 . | 0.3410 | 0.4543 | 0.3704 | -0.0689 | 0.0246  |   |
| 0.0329 | 1   | .   |                             |        |        |        |         |         |   |
| 4075   | C   | C   | . ASN ASN ASN B B 101 101 . | 0.1625 | 0.1544 | 0.1571 | 0.0096  | -0.0063 |   |
| 0.0203 | 1   | .   |                             |        |        |        |         |         |   |
| 4076   | O   | O   | . ASN ASN ASN B B 101 101 . | 0.1361 | 0.1358 | 0.1501 | 0.0012  | -0.0092 |   |
| 0.0108 | 1   | .   |                             |        |        |        |         |         |   |
| 4077   | N   | N   | . LYS LYS LYS B B 102 102 . | 0.1229 | 0.1160 | 0.1256 | 0.0318  | 0.0125  |   |
| 0.0120 | 1   | .   |                             |        |        |        |         |         |   |
| 4078   | CA  | CA  | . LYS LYS LYS B B 102 102 . | 0.1463 | 0.1273 | 0.1439 | 0.0168  | 0.0110  |   |
| 0.0021 | 1   | .   |                             |        |        |        |         |         |   |
| 4079   | CB  | CB  | . LYS LYS LYS B B 102 102 . | 0.1500 | 0.1064 | 0.1453 | -0.0030 | 0.0064  |   |
| 0.0176 | 1   | .   |                             |        |        |        |         |         |   |
| 4080   | CG  | CG  | . LYS LYS LYS B B 102 102 . | 0.1258 | 0.0953 | 0.1397 | 0.0391  | -0.0071 |   |
| 0.0141 | 1   | .   |                             |        |        |        |         |         |   |
| 4081   | CD  | CD  | . LYS LYS LYS B B 102 102 . | 0.1192 | 0.0960 | 0.1735 | 0.0074  | -0.0400 | - |
| 0.0085 | 1   | .   |                             |        |        |        |         |         |   |
| 4082   | CE  | CE  | . LYS LYS LYS B B 102 102 . | 0.1076 | 0.1466 | 0.0956 | 0.0015  | -0.0425 |   |
| 0.0274 | 1   | .   |                             |        |        |        |         |         |   |
| 4083   | NZ  | NZ  | . LYS LYS LYS B B 102 102 . | 0.1887 | 0.1676 | 0.1365 | -0.0036 | -0.0481 |   |
| 0.0604 | 1   | .   |                             |        |        |        |         |         |   |
| 4084   | C   | C   | . LYS LYS LYS B B 102 102 . | 0.1378 | 0.1476 | 0.1547 | 0.0117  | 0.0136  |   |
| 0.0047 | 1   | .   |                             |        |        |        |         |         |   |
| 4085   | O   | O   | . LYS LYS LYS B B 102 102 . | 0.1457 | 0.1407 | 0.1132 | 0.0083  | 0.0025  |   |
| 0.0037 | 1   | .   |                             |        |        |        |         |         |   |
| 4086   | N   | N   | . SER SER SER B B 103 103 . | 0.1517 | 0.1540 | 0.1575 | 0.0048  | 0.0232  |   |
| 0.0106 | 1   | .   |                             |        |        |        |         |         |   |
| 4087   | CA  | CA  | . SER SER SER B B 103 103 . | 0.1702 | 0.1567 | 0.1786 | -0.0048 | 0.0224  | - |
| 0.0058 | 1   | .   |                             |        |        |        |         |         |   |
| 4088   | CB  | CB  | . SER SER SER B B 103 103 . | 0.1786 | 0.1581 | 0.2068 | 0.0096  | 0.0113  |   |
| 0.0127 | 1   | .   |                             |        |        |        |         |         |   |
| 4089   | OG  | OG  | . SER SER SER B B 103 103 . | 0.2188 | 0.1667 | 0.2678 | 0.0132  | -0.0294 |   |
| 0.0194 | 1   | .   |                             |        |        |        |         |         |   |
| 4090   | C   | C   | . SER SER SER B B 103 103 . | 0.1782 | 0.1759 | 0.1868 | -0.0095 | 0.0180  | - |
| 0.0089 | 1   | .   |                             |        |        |        |         |         |   |
| 4091   | O   | O   | . SER SER SER B B 103 103 . | 0.2001 | 0.2267 | 0.2111 | -0.0185 | 0.0241  | - |
| 0.0276 | 1   | .   |                             |        |        |        |         |         |   |
| 4092   | N   | N   | . LYS LYS LYS B B 104 104 . | 0.1305 | 0.1625 | 0.1499 | 0.0082  | 0.0310  | - |
| 0.0154 | 1   | .   |                             |        |        |        |         |         |   |
| 4093   | CA  | CA  | . LYS LYS LYS B B 104 104 . | 0.1623 | 0.1623 | 0.1403 | 0.0099  | 0.0190  |   |
| 0.0070 | 1   | .   |                             |        |        |        |         |         |   |
| 4094   | CB  | CB  | . LYS LYS LYS B B 104 104 . | 0.1303 | 0.1750 | 0.1032 | 0.0084  | 0.0053  |   |
| 0.0022 | 1   | .   |                             |        |        |        |         |         |   |
| 4095   | CG  | CG  | . LYS LYS LYS B B 104 104 . | 0.2058 | 0.1270 | 0.1595 | 0.0201  | 0.0195  | - |
| 0.0104 | 1   | .   |                             |        |        |        |         |         |   |
| 4096   | CD  | CD  | . LYS LYS LYS B B 104 104 . | 0.3225 | 0.2326 | 0.2146 | 0.0196  | 0.0205  | - |
| 0.0354 | 1   | .   |                             |        |        |        |         |         |   |
| 4097   | CE  | CE  | . LYS LYS LYS B B 104 104 . | 0.2669 | 0.3099 | 0.3280 | 0.0439  | 0.0268  | - |
| 0.0604 | 1   | .   |                             |        |        |        |         |         |   |
| 4098   | NZ  | NZ  | . LYS LYS LYS B B 104 104 . | 0.3155 | 0.3296 | 0.3746 | 0.0515  | 0.0369  | - |
| 0.0970 | 1   | .   |                             |        |        |        |         |         |   |
| 4099   | C   | C   | . LYS LYS LYS B B 104 104 . | 0.1431 | 0.1628 | 0.1358 | 0.0129  | -0.0152 |   |
| 0.0033 | 1   | .   |                             |        |        |        |         |         |   |
| 4100   | O   | O   | . LYS LYS LYS B B 104 104 . | 0.1998 | 0.1708 | 0.1294 | 0.0174  | 0.0029  | - |
| 0.0038 | 1   | .   |                             |        |        |        |         |         |   |
| 4101   | N   | N   | . PHE PHE PHE B B 105 105 . | 0.1054 | 0.1221 | 0.1342 | 0.0390  | 0.0122  |   |
| 0.0220 | 1   | .   |                             |        |        |        |         |         |   |

|        |     |     |                             |        |        |        |         |         |   |
|--------|-----|-----|-----------------------------|--------|--------|--------|---------|---------|---|
| 4102   | CA  | CA  | . PHE PHE PHE B B 105 105 . | 0.1117 | 0.1335 | 0.1419 | 0.0295  | 0.0015  |   |
| 0.0159 | 1   | .   |                             |        |        |        |         |         |   |
| 4103   | CB  | CB  | . PHE PHE PHE B B 105 105 . | 0.0724 | 0.1652 | 0.1574 | 0.0285  | 0.0021  |   |
| 0.0127 | 1   | .   |                             |        |        |        |         |         |   |
| 4104   | CG  | CG  | . PHE PHE PHE B B 105 105 . | 0.1277 | 0.2111 | 0.1498 | 0.0415  | -0.0006 | - |
| 0.0074 | 1   | .   |                             |        |        |        |         |         |   |
| 4105   | CD1 | CD1 | . PHE PHE PHE B B 105 105 . | 0.1280 | 0.1718 | 0.2000 | 0.0381  | 0.0086  |   |
| 0.0450 | 1   | .   |                             |        |        |        |         |         |   |
| 4106   | CE1 | CE1 | . PHE PHE PHE B B 105 105 . | 0.1422 | 0.2295 | 0.1651 | 0.0517  | 0.0268  |   |
| 0.0570 | 1   | .   |                             |        |        |        |         |         |   |
| 4107   | CZ  | CZ  | . PHE PHE PHE B B 105 105 . | 0.1783 | 0.2367 | 0.2704 | 0.0150  | -0.0188 |   |
| 0.0137 | 1   | .   |                             |        |        |        |         |         |   |
| 4108   | CE2 | CE2 | . PHE PHE PHE B B 105 105 . | 0.1688 | 0.2895 | 0.2612 | 0.0128  | -0.0186 |   |
| 0.0244 | 1   | .   |                             |        |        |        |         |         |   |
| 4109   | CD2 | CD2 | . PHE PHE PHE B B 105 105 . | 0.1309 | 0.1758 | 0.1943 | 0.0814  | -0.0033 |   |
| 0.0059 | 1   | .   |                             |        |        |        |         |         |   |
| 4110   | C   | C   | . PHE PHE PHE B B 105 105 . | 0.1259 | 0.1405 | 0.1389 | 0.0349  | 0.0114  |   |
| 0.0104 | 1   | .   |                             |        |        |        |         |         |   |
| 4111   | O   | O   | . PHE PHE PHE B B 105 105 . | 0.1334 | 0.1493 | 0.1541 | 0.0582  | -0.0018 | - |
| 0.0201 | 1   | .   |                             |        |        |        |         |         |   |
| 4112   | N   | N   | . GLY GLY GLY B B 106 106 . | 0.1293 | 0.1398 | 0.1380 | 0.0305  | 0.0103  |   |
| 0.0040 | 1   | .   |                             |        |        |        |         |         |   |
| 4113   | CA  | CA  | . GLY GLY GLY B B 106 106 . | 0.1292 | 0.1258 | 0.1307 | 0.0218  | 0.0140  |   |
| 0.0164 | 1   | .   |                             |        |        |        |         |         |   |
| 4114   | C   | C   | . GLY GLY GLY B B 106 106 . | 0.0988 | 0.1177 | 0.1260 | 0.0127  | 0.0020  |   |
| 0.0173 | 1   | .   |                             |        |        |        |         |         |   |
| 4115   | O   | O   | . GLY GLY GLY B B 106 106 . | 0.1251 | 0.1169 | 0.1428 | 0.0197  | 0.0244  |   |
| 0.0342 | 1   | .   |                             |        |        |        |         |         |   |
| 4116   | N   | N   | . ALA ALA ALA B B 107 107 . | 0.1143 | 0.1178 | 0.1054 | 0.0192  | -0.0061 |   |
| 0.0012 | 1   | .   |                             |        |        |        |         |         |   |
| 4117   | CA  | CA  | . ALA ALA ALA B B 107 107 . | 0.1189 | 0.1208 | 0.1229 | 0.0060  | -0.0014 |   |
| 0.0181 | 1   | .   |                             |        |        |        |         |         |   |
| 4118   | CB  | CB  | . ALA ALA ALA B B 107 107 . | 0.1327 | 0.1418 | 0.0981 | 0.0184  | 0.0153  |   |
| 0.0180 | 1   | .   |                             |        |        |        |         |         |   |
| 4119   | C   | C   | . ALA ALA ALA B B 107 107 . | 0.1247 | 0.1228 | 0.1256 | 0.0057  | 0.0026  |   |
| 0.0159 | 1   | .   |                             |        |        |        |         |         |   |
| 4120   | O   | O   | . ALA ALA ALA B B 107 107 . | 0.0999 | 0.1041 | 0.1256 | -0.0055 | 0.0025  |   |
| 0.0184 | 1   | .   |                             |        |        |        |         |         |   |
| 4121   | N   | N   | . ASN ASN ASN B B 108 108 . | 0.1078 | 0.1139 | 0.1206 | 0.0253  | -0.0037 |   |
| 0.0242 | 1   | .   |                             |        |        |        |         |         |   |
| 4122   | CA  | CA  | . ASN ASN ASN B B 108 108 . | 0.1256 | 0.1117 | 0.1433 | 0.0069  | -0.0023 |   |
| 0.0272 | 1   | .   |                             |        |        |        |         |         |   |
| 4123   | CB  | CB  | . ASN ASN ASN B B 108 108 . | 0.0914 | 0.0792 | 0.1315 | 0.0017  | -0.0086 | - |
| 0.0068 | 1   | .   |                             |        |        |        |         |         |   |
| 4124   | CG  | CG  | . ASN ASN ASN B B 108 108 . | 0.1539 | 0.1178 | 0.1570 | 0.0147  | -0.0131 |   |
| 0.0106 | 1   | .   |                             |        |        |        |         |         |   |
| 4125   | OD1 | OD1 | . ASN ASN ASN B B 108 108 . | 0.1410 | 0.1179 | 0.1077 | 0.0098  | -0.0208 | - |
| 0.0116 | 1   | .   |                             |        |        |        |         |         |   |
| 4126   | ND2 | ND2 | . ASN ASN ASN B B 108 108 . | 0.1171 | 0.1468 | 0.1358 | 0.0003  | -0.0001 |   |
| 0.0129 | 1   | .   |                             |        |        |        |         |         |   |
| 4127   | C   | C   | . ASN ASN ASN B B 108 108 . | 0.1296 | 0.1178 | 0.1493 | 0.0191  | 0.0017  |   |
| 0.0255 | 1   | .   |                             |        |        |        |         |         |   |
| 4128   | O   | O   | . ASN ASN ASN B B 108 108 . | 0.1532 | 0.1199 | 0.1973 | -0.0072 | 0.0195  |   |
| 0.0282 | 1   | .   |                             |        |        |        |         |         |   |
| 4129   | N   | N   | . ALA ALA ALA B B 109 109 . | 0.1073 | 0.1172 | 0.1355 | 0.0217  | 0.0192  |   |
| 0.0160 | 1   | .   |                             |        |        |        |         |         |   |
| 4130   | CA  | CA  | . ALA ALA ALA B B 109 109 . | 0.1159 | 0.1146 | 0.1236 | 0.0176  | -0.0041 |   |
| 0.0238 | 1   | .   |                             |        |        |        |         |         |   |
| 4131   | CB  | CB  | . ALA ALA ALA B B 109 109 . | 0.1328 | 0.1132 | 0.1180 | 0.0181  | 0.0177  | - |
| 0.0157 | 1   | .   |                             |        |        |        |         |         |   |

|        |     |     |                             |        |        |        |         |         |   |
|--------|-----|-----|-----------------------------|--------|--------|--------|---------|---------|---|
| 4132   | C   | C   | . ALA ALA ALA B B 109 109 . | 0.1129 | 0.1086 | 0.0924 | 0.0039  | 0.0004  |   |
| 0.0087 | 1   | .   |                             |        |        |        |         |         |   |
| 4133   | O   | O   | . ALA ALA ALA B B 109 109 . | 0.1182 | 0.1116 | 0.0966 | 0.0112  | -0.0217 |   |
| 0.0045 | 1   | .   |                             |        |        |        |         |         |   |
| 4134   | N   | N   | . ILE ILE ILE B B 110 110 . | 0.1048 | 0.1087 | 0.1117 | 0.0075  | -0.0092 |   |
| 0.0163 | 1   | .   |                             |        |        |        |         |         |   |
| 4135   | CA  | CA  | . ILE ILE ILE B B 110 110 . | 0.1003 | 0.1089 | 0.0885 | 0.0109  | -0.0061 |   |
| 0.0144 | 1   | .   |                             |        |        |        |         |         |   |
| 4136   | CB  | CB  | . ILE ILE ILE B B 110 110 . | 0.1301 | 0.1113 | 0.0983 | 0.0169  | -0.0193 |   |
| 0.0153 | 1   | .   |                             |        |        |        |         |         |   |
| 4137   | CG1 | CG1 | . ILE ILE ILE B B 110 110 . | 0.1622 | 0.1261 | 0.1195 | 0.0236  | 0.0049  | - |
| 0.0012 | 1   | .   |                             |        |        |        |         |         |   |
| 4138   | CD1 | CD1 | . ILE ILE ILE B B 110 110 . | 0.2226 | 0.1419 | 0.1186 | 0.0301  | -0.0077 |   |
| 0.0013 | 1   | .   |                             |        |        |        |         |         |   |
| 4139   | CG2 | CG2 | . ILE ILE ILE B B 110 110 . | 0.1326 | 0.0797 | 0.1116 | 0.0165  | -0.0478 |   |
| 0.0036 | 1   | .   |                             |        |        |        |         |         |   |
| 4140   | C   | C   | . ILE ILE ILE B B 110 110 . | 0.1052 | 0.1125 | 0.1018 | -0.0041 | 0.0008  |   |
| 0.0028 | 1   | .   |                             |        |        |        |         |         |   |
| 4141   | O   | O   | . ILE ILE ILE B B 110 110 . | 0.1037 | 0.1126 | 0.1206 | 0.0014  | 0.0043  |   |
| 0.0062 | 1   | .   |                             |        |        |        |         |         |   |
| 4142   | N   | N   | . LEU LEU LEU B B 111 111 . | 0.0711 | 0.1015 | 0.0881 | 0.0276  | -0.0059 | - |
| 0.0006 | 1   | .   |                             |        |        |        |         |         |   |
| 4143   | CA  | CA  | . LEU LEU LEU B B 111 111 . | 0.0896 | 0.0985 | 0.0977 | 0.0016  | 0.0051  | - |
| 0.0008 | 1   | .   |                             |        |        |        |         |         |   |
| 4144   | CB  | CB  | . LEU LEU LEU B B 111 111 . | 0.0666 | 0.0992 | 0.1154 | 0.0355  | 0.0068  |   |
| 0.0050 | 1   | .   |                             |        |        |        |         |         |   |
| 4145   | CG  | CG  | . LEU LEU LEU B B 111 111 . | 0.0658 | 0.0827 | 0.1039 | 0.0216  | 0.0030  | - |
| 0.0227 | 1   | .   |                             |        |        |        |         |         |   |
| 4146   | CD1 | CD1 | . LEU LEU LEU B B 111 111 . | 0.1333 | 0.0815 | 0.1129 | -0.0170 | 0.0121  | - |
| 0.0444 | 1   | .   |                             |        |        |        |         |         |   |
| 4147   | CD2 | CD2 | . LEU LEU LEU B B 111 111 . | 0.1038 | 0.1382 | 0.1503 | -0.0125 | 0.0265  |   |
| 0.0424 | 1   | .   |                             |        |        |        |         |         |   |
| 4148   | C   | C   | . LEU LEU LEU B B 111 111 . | 0.0852 | 0.1274 | 0.1281 | -0.0031 | -0.0027 | - |
| 0.0031 | 1   | .   |                             |        |        |        |         |         |   |
| 4149   | O   | O   | . LEU LEU LEU B B 111 111 . | 0.1188 | 0.1168 | 0.1304 | 0.0194  | 0.0018  | - |
| 0.0048 | 1   | .   |                             |        |        |        |         |         |   |
| 4150   | N   | N   | . GLY GLY GLY B B 112 112 . | 0.1242 | 0.1292 | 0.0802 | -0.0012 | 0.0137  |   |
| 0.0059 | 1   | .   |                             |        |        |        |         |         |   |
| 4151   | CA  | CA  | . GLY GLY GLY B B 112 112 . | 0.1162 | 0.1407 | 0.1078 | 0.0143  | -0.0094 |   |
| 0.0165 | 1   | .   |                             |        |        |        |         |         |   |
| 4152   | C   | C   | . GLY GLY GLY B B 112 112 . | 0.1161 | 0.1164 | 0.1271 | 0.0188  | -0.0033 |   |
| 0.0146 | 1   | .   |                             |        |        |        |         |         |   |
| 4153   | O   | O   | . GLY GLY GLY B B 112 112 . | 0.1271 | 0.1297 | 0.1351 | 0.0280  | -0.0105 |   |
| 0.0170 | 1   | .   |                             |        |        |        |         |         |   |
| 4154   | N   | N   | . VAL VAL VAL B B 113 113 . | 0.1108 | 0.1368 | 0.1321 | 0.0202  | -0.0209 |   |
| 0.0056 | 1   | .   |                             |        |        |        |         |         |   |
| 4155   | CA  | CA  | . VAL VAL VAL B B 113 113 . | 0.0997 | 0.1213 | 0.1197 | 0.0197  | -0.0008 |   |
| 0.0093 | 1   | .   |                             |        |        |        |         |         |   |
| 4156   | CB  | CB  | . VAL VAL VAL B B 113 113 . | 0.0902 | 0.1220 | 0.1360 | 0.0067  | -0.0208 | - |
| 0.0003 | 1   | .   |                             |        |        |        |         |         |   |
| 4157   | CG1 | CG1 | . VAL VAL VAL B B 113 113 . | 0.1054 | 0.1704 | 0.1437 | -0.0267 | -0.0224 |   |
| 0.0343 | 1   | .   |                             |        |        |        |         |         |   |
| 4158   | CG2 | CG2 | . VAL VAL VAL B B 113 113 . | 0.1009 | 0.1321 | 0.1368 | 0.0359  | 0.0124  |   |
| 0.0091 | 1   | .   |                             |        |        |        |         |         |   |
| 4159   | C   | C   | . VAL VAL VAL B B 113 113 . | 0.0889 | 0.1083 | 0.1181 | 0.0188  | -0.0153 |   |
| 0.0194 | 1   | .   |                             |        |        |        |         |         |   |
| 4160   | O   | O   | . VAL VAL VAL B B 113 113 . | 0.1159 | 0.1280 | 0.1041 | 0.0109  | -0.0136 |   |
| 0.0142 | 1   | .   |                             |        |        |        |         |         |   |
| 4161   | N   | N   | . SER SER SER B B 114 114 . | 0.0962 | 0.1154 | 0.1157 | 0.0116  | -0.0092 |   |
| 0.0110 | 1   | .   |                             |        |        |        |         |         |   |

|        |     |     |                             |        |        |        |         |         |   |
|--------|-----|-----|-----------------------------|--------|--------|--------|---------|---------|---|
| 4162   | CA  | CA  | . SER SER SER B B 114 114 . | 0.0996 | 0.0939 | 0.1099 | 0.0126  | -0.0128 |   |
| 0.0103 | 1   | .   |                             |        |        |        |         |         |   |
| 4163   | CB  | CB  | . SER SER SER B B 114 114 . | 0.1297 | 0.1512 | 0.1086 | -0.0058 | -0.0130 | - |
| 0.0013 | 1   | .   |                             |        |        |        |         |         |   |
| 4164   | OG  | OG  | . SER SER SER B B 114 114 . | 0.1958 | 0.1507 | 0.1411 | 0.0009  | -0.0200 |   |
| 0.0081 | 1   | .   |                             |        |        |        |         |         |   |
| 4165   | C   | C   | . SER SER SER B B 114 114 . | 0.1122 | 0.1066 | 0.1125 | 0.0020  | -0.0016 | - |
| 0.0045 | 1   | .   |                             |        |        |        |         |         |   |
| 4166   | O   | O   | . SER SER SER B B 114 114 . | 0.1104 | 0.1010 | 0.1271 | 0.0097  | -0.0088 |   |
| 0.0113 | 1   | .   |                             |        |        |        |         |         |   |
| 4167   | N   | N   | . LEU LEU LEU B B 115 115 . | 0.0982 | 0.0907 | 0.1217 | 0.0116  | -0.0065 |   |
| 0.0071 | 1   | .   |                             |        |        |        |         |         |   |
| 4168   | CA  | CA  | . LEU LEU LEU B B 115 115 . | 0.1006 | 0.0935 | 0.1443 | 0.0158  | 0.0081  |   |
| 0.0212 | 1   | .   |                             |        |        |        |         |         |   |
| 4169   | CB  | CB  | . LEU LEU LEU B B 115 115 . | 0.0816 | 0.0955 | 0.1139 | -0.0044 | 0.0101  |   |
| 0.0085 | 1   | .   |                             |        |        |        |         |         |   |
| 4170   | CG  | CG  | . LEU LEU LEU B B 115 115 . | 0.0900 | 0.0736 | 0.0846 | 0.0146  | 0.0275  |   |
| 0.0098 | 1   | .   |                             |        |        |        |         |         |   |
| 4171   | CD1 | CD1 | . LEU LEU LEU B B 115 115 . | 0.0858 | 0.1091 | 0.0829 | -0.0130 | 0.0113  |   |
| 0.0094 | 1   | .   |                             |        |        |        |         |         |   |
| 4172   | CD2 | CD2 | . LEU LEU LEU B B 115 115 . | 0.1398 | 0.1079 | 0.1189 | -0.0149 | 0.0292  |   |
| 0.0237 | 1   | .   |                             |        |        |        |         |         |   |
| 4173   | C   | C   | . LEU LEU LEU B B 115 115 . | 0.1161 | 0.1283 | 0.1424 | 0.0151  | -0.0048 |   |
| 0.0132 | 1   | .   |                             |        |        |        |         |         |   |
| 4174   | O   | O   | . LEU LEU LEU B B 115 115 . | 0.1528 | 0.1191 | 0.1613 | 0.0106  | -0.0161 |   |
| 0.0176 | 1   | .   |                             |        |        |        |         |         |   |
| 4175   | N   | N   | . ALA ALA ALA B B 116 116 . | 0.1142 | 0.1079 | 0.1296 | 0.0228  | 0.0130  |   |
| 0.0055 | 1   | .   |                             |        |        |        |         |         |   |
| 4176   | CA  | CA  | . ALA ALA ALA B B 116 116 . | 0.1088 | 0.1344 | 0.1322 | 0.0016  | -0.0062 |   |
| 0.0119 | 1   | .   |                             |        |        |        |         |         |   |
| 4177   | CB  | CB  | . ALA ALA ALA B B 116 116 . | 0.1080 | 0.1083 | 0.1153 | -0.0005 | 0.0079  | - |
| 0.0030 | 1   | .   |                             |        |        |        |         |         |   |
| 4178   | C   | C   | . ALA ALA ALA B B 116 116 . | 0.1113 | 0.1253 | 0.1302 | 0.0060  | 0.0001  | - |
| 0.0028 | 1   | .   |                             |        |        |        |         |         |   |
| 4179   | O   | O   | . ALA ALA ALA B B 116 116 . | 0.1292 | 0.1597 | 0.1530 | -0.0059 | -0.0102 |   |
| 0.0303 | 1   | .   |                             |        |        |        |         |         |   |
| 4180   | N   | N   | . VAL VAL VAL B B 117 117 . | 0.1253 | 0.1190 | 0.1149 | 0.0084  | -0.0271 |   |
| 0.0091 | 1   | .   |                             |        |        |        |         |         |   |
| 4181   | CA  | CA  | . VAL VAL VAL B B 117 117 . | 0.1305 | 0.1247 | 0.1372 | 0.0189  | -0.0228 |   |
| 0.0162 | 1   | .   |                             |        |        |        |         |         |   |
| 4182   | CB  | CB  | . VAL VAL VAL B B 117 117 . | 0.1227 | 0.1095 | 0.1287 | 0.0280  | -0.0330 |   |
| 0.0139 | 1   | .   |                             |        |        |        |         |         |   |
| 4183   | CG1 | CG1 | . VAL VAL VAL B B 117 117 . | 0.1670 | 0.1348 | 0.1953 | 0.0277  | -0.0508 |   |
| 0.0193 | 1   | .   |                             |        |        |        |         |         |   |
| 4184   | CG2 | CG2 | . VAL VAL VAL B B 117 117 . | 0.1360 | 0.1649 | 0.1314 | 0.0371  | -0.0230 |   |
| 0.0077 | 1   | .   |                             |        |        |        |         |         |   |
| 4185   | C   | C   | . VAL VAL VAL B B 117 117 . | 0.1432 | 0.1504 | 0.1504 | 0.0088  | -0.0080 |   |
| 0.0111 | 1   | .   |                             |        |        |        |         |         |   |
| 4186   | O   | O   | . VAL VAL VAL B B 117 117 . | 0.1513 | 0.1751 | 0.1586 | 0.0153  | -0.0154 |   |
| 0.0120 | 1   | .   |                             |        |        |        |         |         |   |
| 4187   | N   | N   | . CYS CYS CYS B B 118 118 . | 0.1555 | 0.1573 | 0.1321 | 0.0324  | -0.0071 |   |
| 0.0224 | 1   | .   |                             |        |        |        |         |         |   |
| 4188   | CA  | CA  | . CYS CYS CYS B B 118 118 . | 0.1504 | 0.1492 | 0.1478 | 0.0149  | 0.0024  |   |
| 0.0180 | 1   | .   |                             |        |        |        |         |         |   |
| 4189   | CB  | CB  | . CYS CYS CYS B B 118 118 . | 0.1313 | 0.1449 | 0.1362 | -0.0091 | 0.0162  |   |
| 0.0076 | 1   | .   |                             |        |        |        |         |         |   |
| 4190   | SG  | SG  | . CYS CYS CYS B B 118 118 . | 0.1682 | 0.1643 | 0.1688 | -0.0060 | 0.0131  |   |
| 0.0012 | 1   | .   |                             |        |        |        |         |         |   |
| 4191   | C   | C   | . CYS CYS CYS B B 118 118 . | 0.1573 | 0.1549 | 0.1732 | 0.0050  | -0.0043 |   |
| 0.0049 | 1   | .   |                             |        |        |        |         |         |   |

|        |    |    |                             |        |        |        |         |         |   |
|--------|----|----|-----------------------------|--------|--------|--------|---------|---------|---|
| 4192   | O  | O  | . CYS CYS CYS B B 118 118 . | 0.1306 | 0.1513 | 0.1826 | 0.0236  | 0.0038  | - |
| 0.0024 | 1  | .  |                             |        |        |        |         |         |   |
| 4193   | N  | N  | . LYS LYS LYS B B 119 119 . | 0.1620 | 0.1543 | 0.1534 | 0.0222  | -0.0032 |   |
| 0.0092 | 1  | .  |                             |        |        |        |         |         |   |
| 4194   | CA | CA | . LYS LYS LYS B B 119 119 . | 0.1527 | 0.1519 | 0.1555 | -0.0077 | 0.0006  |   |
| 0.0203 | 1  | .  |                             |        |        |        |         |         |   |
| 4195   | CB | CB | . LYS LYS LYS B B 119 119 . | 0.1391 | 0.1456 | 0.1503 | -0.0143 | -0.0045 | - |
| 0.0093 | 1  | .  |                             |        |        |        |         |         |   |
| 4196   | CG | CG | . LYS LYS LYS B B 119 119 . | 0.1156 | 0.1805 | 0.1516 | 0.0140  | 0.0005  | - |
| 0.0123 | 1  | .  |                             |        |        |        |         |         |   |
| 4197   | CD | CD | . LYS LYS LYS B B 119 119 . | 0.1122 | 0.2580 | 0.1752 | 0.0136  | -0.0034 | - |
| 0.0424 | 1  | .  |                             |        |        |        |         |         |   |
| 4198   | CE | CE | . LYS LYS LYS B B 119 119 . | 0.2060 | 0.2940 | 0.1952 | -0.0137 | -0.0027 |   |
| 0.0029 | 1  | .  |                             |        |        |        |         |         |   |
| 4199   | NZ | NZ | . LYS LYS LYS B B 119 119 . | 0.1462 | 0.2707 | 0.1795 | 0.0145  | 0.0158  | - |
| 0.0070 | 1  | .  |                             |        |        |        |         |         |   |
| 4200   | C  | C  | . LYS LYS LYS B B 119 119 . | 0.1415 | 0.1619 | 0.1524 | -0.0090 | -0.0052 |   |
| 0.0081 | 1  | .  |                             |        |        |        |         |         |   |
| 4201   | O  | O  | . LYS LYS LYS B B 119 119 . | 0.1891 | 0.1759 | 0.1653 | -0.0137 | -0.0081 |   |
| 0.0175 | 1  | .  |                             |        |        |        |         |         |   |
| 4202   | N  | N  | . ALA ALA ALA B B 120 120 . | 0.1428 | 0.1494 | 0.1580 | -0.0155 | -0.0013 |   |
| 0.0090 | 1  | .  |                             |        |        |        |         |         |   |
| 4203   | CA | CA | . ALA ALA ALA B B 120 120 . | 0.1456 | 0.1556 | 0.1537 | -0.0086 | 0.0051  | - |
| 0.0035 | 1  | .  |                             |        |        |        |         |         |   |
| 4204   | CB | CB | . ALA ALA ALA B B 120 120 . | 0.1439 | 0.1474 | 0.1232 | -0.0124 | 0.0182  | - |
| 0.0191 | 1  | .  |                             |        |        |        |         |         |   |
| 4205   | C  | C  | . ALA ALA ALA B B 120 120 . | 0.1666 | 0.1453 | 0.1602 | -0.0084 | -0.0021 |   |
| 0.0058 | 1  | .  |                             |        |        |        |         |         |   |
| 4206   | O  | O  | . ALA ALA ALA B B 120 120 . | 0.1818 | 0.1687 | 0.1822 | -0.0051 | -0.0087 |   |
| 0.0280 | 1  | .  |                             |        |        |        |         |         |   |
| 4207   | N  | N  | . GLY GLY GLY B B 121 121 . | 0.1692 | 0.1371 | 0.1422 | 0.0097  | -0.0015 |   |
| 0.0030 | 1  | .  |                             |        |        |        |         |         |   |
| 4208   | CA | CA | . GLY GLY GLY B B 121 121 . | 0.1426 | 0.1447 | 0.1737 | 0.0088  | -0.0045 | - |
| 0.0045 | 1  | .  |                             |        |        |        |         |         |   |
| 4209   | C  | C  | . GLY GLY GLY B B 121 121 . | 0.1622 | 0.1699 | 0.1699 | -0.0045 | -0.0093 |   |
| 0.0018 | 1  | .  |                             |        |        |        |         |         |   |
| 4210   | O  | O  | . GLY GLY GLY B B 121 121 . | 0.1626 | 0.1521 | 0.1877 | -0.0193 | -0.0123 |   |
| 0.0139 | 1  | .  |                             |        |        |        |         |         |   |
| 4211   | N  | N  | . ALA ALA ALA B B 122 122 . | 0.1558 | 0.1633 | 0.1501 | 0.0037  | 0.0049  |   |
| 0.0046 | 1  | .  |                             |        |        |        |         |         |   |
| 4212   | CA | CA | . ALA ALA ALA B B 122 122 . | 0.1560 | 0.1837 | 0.1870 | 0.0021  | 0.0028  |   |
| 0.0015 | 1  | .  |                             |        |        |        |         |         |   |
| 4213   | CB | CB | . ALA ALA ALA B B 122 122 . | 0.1235 | 0.1959 | 0.1729 | 0.0043  | 0.0095  | - |
| 0.0041 | 1  | .  |                             |        |        |        |         |         |   |
| 4214   | C  | C  | . ALA ALA ALA B B 122 122 . | 0.1513 | 0.1866 | 0.1866 | -0.0056 | -0.0083 |   |
| 0.0037 | 1  | .  |                             |        |        |        |         |         |   |
| 4215   | O  | O  | . ALA ALA ALA B B 122 122 . | 0.2016 | 0.1693 | 0.2018 | -0.0003 | -0.0083 |   |
| 0.0090 | 1  | .  |                             |        |        |        |         |         |   |
| 4216   | N  | N  | . ALA ALA ALA B B 123 123 . | 0.1602 | 0.1772 | 0.1879 | -0.0164 | -0.0033 |   |
| 0.0186 | 1  | .  |                             |        |        |        |         |         |   |
| 4217   | CA | CA | . ALA ALA ALA B B 123 123 . | 0.1460 | 0.1867 | 0.1893 | -0.0231 | -0.0024 |   |
| 0.0134 | 1  | .  |                             |        |        |        |         |         |   |
| 4218   | CB | CB | . ALA ALA ALA B B 123 123 . | 0.1703 | 0.1772 | 0.1932 | -0.0223 | -0.0183 |   |
| 0.0051 | 1  | .  |                             |        |        |        |         |         |   |
| 4219   | C  | C  | . ALA ALA ALA B B 123 123 . | 0.1685 | 0.1938 | 0.2179 | -0.0080 | -0.0015 |   |
| 0.0106 | 1  | .  |                             |        |        |        |         |         |   |
| 4220   | O  | O  | . ALA ALA ALA B B 123 123 . | 0.1609 | 0.1966 | 0.2474 | -0.0045 | -0.0091 |   |
| 0.0038 | 1  | .  |                             |        |        |        |         |         |   |
| 4221   | N  | N  | . GLU GLU GLU B B 124 124 . | 0.1683 | 0.1935 | 0.2430 | -0.0157 | -0.0062 |   |
| 0.0202 | 1  | .  |                             |        |        |        |         |         |   |

|        |     |     |                             |        |        |        |         |         |   |
|--------|-----|-----|-----------------------------|--------|--------|--------|---------|---------|---|
| 4222   | CA  | CA  | . GLU GLU GLU B B 124 124 . | 0.1804 | 0.2116 | 0.2453 | -0.0146 | 0.0015  |   |
| 0.0185 | 1   | .   |                             |        |        |        |         |         |   |
| 4223   | CB  | CB  | . GLU GLU GLU B B 124 124 . | 0.1822 | 0.2246 | 0.2656 | -0.0237 | -0.0024 |   |
| 0.0116 | 1   | .   |                             |        |        |        |         |         |   |
| 4224   | CG  | CG  | . GLU GLU GLU B B 124 124 . | 0.2325 | 0.2794 | 0.2872 | 0.0000  | 0.0137  |   |
| 0.0347 | 1   | .   |                             |        |        |        |         |         |   |
| 4225   | CD  | CD  | . GLU GLU GLU B B 124 124 . | 0.3272 | 0.2988 | 0.3182 | -0.0354 | -0.0049 |   |
| 0.0558 | 1   | .   |                             |        |        |        |         |         |   |
| 4226   | OE1 | OE1 | . GLU GLU GLU B B 124 124 . | 0.3966 | 0.3303 | 0.3976 | -0.0757 | 0.0165  |   |
| 0.0458 | 1   | .   |                             |        |        |        |         |         |   |
| 4227   | OE2 | OE2 | . GLU GLU GLU B B 124 124 . | 0.3712 | 0.2842 | 0.3370 | 0.0099  | 0.0230  |   |
| 0.0747 | 1   | .   |                             |        |        |        |         |         |   |
| 4228   | C   | C   | . GLU GLU GLU B B 124 124 . | 0.1993 | 0.2194 | 0.2658 | -0.0215 | -0.0087 |   |
| 0.0118 | 1   | .   |                             |        |        |        |         |         |   |
| 4229   | O   | O   | . GLU GLU GLU B B 124 124 . | 0.2016 | 0.2232 | 0.2946 | -0.0390 | 0.0041  |   |
| 0.0098 | 1   | .   |                             |        |        |        |         |         |   |
| 4230   | N   | N   | . ARG ARG ARG B B 125 125 . | 0.1986 | 0.2375 | 0.2519 | -0.0215 | -0.0127 | - |
| 0.0029 | 1   | .   |                             |        |        |        |         |         |   |
| 4231   | CA  | CA  | . ARG ARG ARG B B 125 125 . | 0.2417 | 0.2501 | 0.2730 | -0.0122 | -0.0066 | - |
| 0.0057 | 1   | .   |                             |        |        |        |         |         |   |
| 4232   | CB  | CB  | . ARG ARG ARG B B 125 125 . | 0.2461 | 0.2587 | 0.2693 | -0.0026 | -0.0222 | - |
| 0.0095 | 1   | .   |                             |        |        |        |         |         |   |
| 4233   | CG  | CG  | . ARG ARG ARG B B 125 125 . | 0.3024 | 0.2545 | 0.2850 | 0.0102  | -0.0268 | - |
| 0.0114 | 1   | .   |                             |        |        |        |         |         |   |
| 4234   | CD  | CD  | . ARG ARG ARG B B 125 125 . | 0.3341 | 0.3910 | 0.4026 | -0.0005 | -0.0466 | - |
| 0.0067 | 1   | .   |                             |        |        |        |         |         |   |
| 4235   | NE  | NE  | . ARG ARG ARG B B 125 125 . | 0.4437 | 0.4400 | 0.4687 | -0.0134 | -0.0467 | - |
| 0.0129 | 1   | .   |                             |        |        |        |         |         |   |
| 4236   | CZ  | CZ  | . ARG ARG ARG B B 125 125 . | 0.5122 | 0.5079 | 0.5261 | -0.0189 | -0.0488 | - |
| 0.0150 | 1   | .   |                             |        |        |        |         |         |   |
| 4237   | NH1 | NH1 | . ARG ARG ARG B B 125 125 . | 0.5119 | 0.5278 | 0.5102 | -0.0725 | -0.0491 | - |
| 0.0163 | 1   | .   |                             |        |        |        |         |         |   |
| 4238   | NH2 | NH2 | . ARG ARG ARG B B 125 125 . | 0.5951 | 0.4972 | 0.5200 | -0.0433 | -0.0643 | - |
| 0.0303 | 1   | .   |                             |        |        |        |         |         |   |
| 4239   | C   | C   | . ARG ARG ARG B B 125 125 . | 0.2493 | 0.2593 | 0.2772 | -0.0272 | 0.0067  | - |
| 0.0065 | 1   | .   |                             |        |        |        |         |         |   |
| 4240   | O   | O   | . ARG ARG ARG B B 125 125 . | 0.2721 | 0.2603 | 0.3163 | -0.0577 | -0.0025 | - |
| 0.0116 | 1   | .   |                             |        |        |        |         |         |   |
| 4241   | N   | N   | . GLU GLU GLU B B 126 126 . | 0.2216 | 0.2423 | 0.2785 | -0.0279 | 0.0085  |   |
| 0.0041 | 1   | .   |                             |        |        |        |         |         |   |
| 4242   | CA  | CA  | . GLU GLU GLU B B 126 126 . | 0.2426 | 0.2348 | 0.2986 | -0.0428 | 0.0144  | - |
| 0.0068 | 1   | .   |                             |        |        |        |         |         |   |
| 4243   | CB  | CB  | . GLU GLU GLU B B 126 126 . | 0.2702 | 0.2608 | 0.3318 | -0.0475 | 0.0260  |   |
| 0.0001 | 1   | .   |                             |        |        |        |         |         |   |
| 4244   | CG  | CG  | . GLU GLU GLU B B 126 126 . | 0.2995 | 0.3134 | 0.3619 | -0.0876 | 0.0330  |   |
| 0.0247 | 1   | .   |                             |        |        |        |         |         |   |
| 4245   | CD  | CD  | . GLU GLU GLU B B 126 126 . | 0.3919 | 0.4376 | 0.4564 | -0.1337 | 0.0004  |   |
| 0.0688 | 1   | .   |                             |        |        |        |         |         |   |
| 4246   | OE1 | OE1 | . GLU GLU GLU B B 126 126 . | 0.2859 | 0.4604 | 0.4992 | -0.1733 | 0.0121  |   |
| 0.1002 | 1   | .   |                             |        |        |        |         |         |   |
| 4247   | OE2 | OE2 | . GLU GLU GLU B B 126 126 . | 0.4509 | 0.5000 | 0.4950 | -0.1400 | -0.0020 |   |
| 0.1150 | 1   | .   |                             |        |        |        |         |         |   |
| 4248   | C   | C   | . GLU GLU GLU B B 126 126 . | 0.2549 | 0.2227 | 0.2732 | -0.0286 | 0.0083  | - |
| 0.0219 | 1   | .   |                             |        |        |        |         |         |   |
| 4249   | O   | O   | . GLU GLU GLU B B 126 126 . | 0.2653 | 0.2269 | 0.3124 | -0.0355 | 0.0150  | - |
| 0.0193 | 1   | .   |                             |        |        |        |         |         |   |
| 4250   | N   | N   | . LEU LEU LEU B B 127 127 . | 0.2301 | 0.1813 | 0.2317 | -0.0250 | 0.0140  | - |
| 0.0063 | 1   | .   |                             |        |        |        |         |         |   |
| 4251   | CA  | CA  | . LEU LEU LEU B B 127 127 . | 0.2190 | 0.2043 | 0.2151 | -0.0176 | -0.0055 | - |
| 0.0002 | 1   | .   |                             |        |        |        |         |         |   |

|        |     |     |                             |        |        |        |         |         |   |
|--------|-----|-----|-----------------------------|--------|--------|--------|---------|---------|---|
| 4252   | CB  | CB  | . LEU LEU LEU B B 127 127 . | 0.1893 | 0.2167 | 0.2302 | -0.0135 | -0.0170 |   |
| 0.0227 | 1   | .   |                             |        |        |        |         |         |   |
| 4253   | CG  | CG  | . LEU LEU LEU B B 127 127 . | 0.2224 | 0.1974 | 0.2133 | -0.0198 | -0.0430 |   |
| 0.0148 | 1   | .   |                             |        |        |        |         |         |   |
| 4254   | CD1 | CD1 | . LEU LEU LEU B B 127 127 . | 0.1887 | 0.2336 | 0.1660 | -0.0934 | -0.0288 |   |
| 0.0477 | 1   | .   |                             |        |        |        |         |         |   |
| 4255   | CD2 | CD2 | . LEU LEU LEU B B 127 127 . | 0.2382 | 0.2004 | 0.2147 | -0.0818 | -0.0116 |   |
| 0.0069 | 1   | .   |                             |        |        |        |         |         |   |
| 4256   | C   | C   | . LEU LEU LEU B B 127 127 . | 0.2117 | 0.1866 | 0.2059 | -0.0133 | 0.0034  |   |
| 0.0037 | 1   | .   |                             |        |        |        |         |         |   |
| 4257   | O   | O   | . LEU LEU LEU B B 127 127 . | 0.2060 | 0.2132 | 0.1794 | -0.0317 | 0.0076  |   |
| 0.0082 | 1   | .   |                             |        |        |        |         |         |   |
| 4258   | N   | N   | . PRO PRO PRO B B 128 128 . | 0.1966 | 0.1759 | 0.2134 | -0.0190 | -0.0039 |   |
| 0.0076 | 1   | .   |                             |        |        |        |         |         |   |
| 4259   | CA  | CA  | . PRO PRO PRO B B 128 128 . | 0.2040 | 0.1870 | 0.2198 | -0.0139 | -0.0030 |   |
| 0.0114 | 1   | .   |                             |        |        |        |         |         |   |
| 4260   | CB  | CB  | . PRO PRO PRO B B 128 128 . | 0.2201 | 0.1673 | 0.2383 | -0.0152 | 0.0072  |   |
| 0.0033 | 1   | .   |                             |        |        |        |         |         |   |
| 4261   | CG  | CG  | . PRO PRO PRO B B 128 128 . | 0.2329 | 0.2185 | 0.2417 | 0.0021  | -0.0196 | - |
| 0.0015 | 1   | .   |                             |        |        |        |         |         |   |
| 4262   | CD  | CD  | . PRO PRO PRO B B 128 128 . | 0.1969 | 0.2043 | 0.1941 | -0.0084 | 0.0025  |   |
| 0.0009 | 1   | .   |                             |        |        |        |         |         |   |
| 4263   | C   | C   | . PRO PRO PRO B B 128 128 . | 0.1950 | 0.1649 | 0.2009 | -0.0206 | -0.0224 |   |
| 0.0034 | 1   | .   |                             |        |        |        |         |         |   |
| 4264   | O   | O   | . PRO PRO PRO B B 128 128 . | 0.1942 | 0.1676 | 0.2106 | -0.0327 | -0.0368 | - |
| 0.0084 | 1   | .   |                             |        |        |        |         |         |   |
| 4265   | N   | N   | . LEU LEU LEU B B 129 129 . | 0.1977 | 0.1783 | 0.1812 | -0.0173 | -0.0258 |   |
| 0.0127 | 1   | .   |                             |        |        |        |         |         |   |
| 4266   | CA  | CA  | . LEU LEU LEU B B 129 129 . | 0.1834 | 0.1693 | 0.1772 | -0.0119 | -0.0234 | - |
| 0.0124 | 1   | .   |                             |        |        |        |         |         |   |
| 4267   | CB  | CB  | . LEU LEU LEU B B 129 129 . | 0.1336 | 0.1797 | 0.1648 | -0.0089 | -0.0327 |   |
| 0.0024 | 1   | .   |                             |        |        |        |         |         |   |
| 4268   | CG  | CG  | . LEU LEU LEU B B 129 129 . | 0.1175 | 0.1388 | 0.1995 | 0.0089  | -0.0265 | - |
| 0.0166 | 1   | .   |                             |        |        |        |         |         |   |
| 4269   | CD1 | CD1 | . LEU LEU LEU B B 129 129 . | 0.1244 | 0.1507 | 0.1483 | 0.0444  | 0.0396  | - |
| 0.0262 | 1   | .   |                             |        |        |        |         |         |   |
| 4270   | CD2 | CD2 | . LEU LEU LEU B B 129 129 . | 0.1812 | 0.1453 | 0.1276 | -0.0025 | -0.0297 | - |
| 0.0155 | 1   | .   |                             |        |        |        |         |         |   |
| 4271   | C   | C   | . LEU LEU LEU B B 129 129 . | 0.1745 | 0.1712 | 0.1713 | -0.0156 | -0.0214 |   |
| 0.0000 | 1   | .   |                             |        |        |        |         |         |   |
| 4272   | O   | O   | . LEU LEU LEU B B 129 129 . | 0.2056 | 0.1603 | 0.1786 | 0.0021  | -0.0243 |   |
| 0.0055 | 1   | .   |                             |        |        |        |         |         |   |
| 4273   | N   | N   | . TYR TYR TYR B B 130 130 . | 0.1809 | 0.1511 | 0.1759 | -0.0141 | -0.0176 |   |
| 0.0021 | 1   | .   |                             |        |        |        |         |         |   |
| 4274   | CA  | CA  | . TYR TYR TYR B B 130 130 . | 0.1948 | 0.1743 | 0.1741 | -0.0094 | -0.0179 |   |
| 0.0026 | 1   | .   |                             |        |        |        |         |         |   |
| 4275   | CB  | CB  | . TYR TYR TYR B B 130 130 . | 0.1886 | 0.1381 | 0.2107 | -0.0097 | -0.0037 |   |
| 0.0043 | 1   | .   |                             |        |        |        |         |         |   |
| 4276   | CG  | CG  | . TYR TYR TYR B B 130 130 . | 0.2175 | 0.1401 | 0.1684 | -0.0033 | -0.0233 |   |
| 0.0377 | 1   | .   |                             |        |        |        |         |         |   |
| 4277   | CD1 | CD1 | . TYR TYR TYR B B 130 130 . | 0.2769 | 0.1491 | 0.2006 | 0.0167  | -0.0488 |   |
| 0.0289 | 1   | .   |                             |        |        |        |         |         |   |
| 4278   | CE1 | CE1 | . TYR TYR TYR B B 130 130 . | 0.2622 | 0.2109 | 0.2477 | -0.0073 | -0.0413 |   |
| 0.0212 | 1   | .   |                             |        |        |        |         |         |   |
| 4279   | CZ  | CZ  | . TYR TYR TYR B B 130 130 . | 0.2233 | 0.1948 | 0.2582 | -0.0087 | -0.0094 |   |
| 0.0405 | 1   | .   |                             |        |        |        |         |         |   |
| 4280   | OH  | OH  | . TYR TYR TYR B B 130 130 . | 0.2302 | 0.2122 | 0.3983 | 0.0171  | 0.0196  |   |
| 0.0369 | 1   | .   |                             |        |        |        |         |         |   |
| 4281   | CE2 | CE2 | . TYR TYR TYR B B 130 130 . | 0.1915 | 0.1746 | 0.2181 | -0.0018 | 0.0234  |   |
| 0.0069 | 1   | .   |                             |        |        |        |         |         |   |

|        |     |     |                             |        |        |        |         |         |   |
|--------|-----|-----|-----------------------------|--------|--------|--------|---------|---------|---|
| 4282   | CD2 | CD2 | . TYR TYR TYR B B 130 130 . | 0.1481 | 0.1507 | 0.1575 | -0.0011 | -0.0284 |   |
| 0.0148 | 1   | .   |                             |        |        |        |         |         |   |
| 4283   | C   | C   | . TYR TYR TYR B B 130 130 . | 0.1743 | 0.1643 | 0.1720 | -0.0181 | -0.0243 |   |
| 0.0064 | 1   | .   |                             |        |        |        |         |         |   |
| 4284   | O   | O   | . TYR TYR TYR B B 130 130 . | 0.2024 | 0.1804 | 0.1536 | -0.0186 | -0.0482 | - |
| 0.0022 | 1   | .   |                             |        |        |        |         |         |   |
| 4285   | N   | N   | . ARG ARG ARG B B 131 131 . | 0.1778 | 0.1588 | 0.1557 | -0.0091 | -0.0194 | - |
| 0.0002 | 1   | .   |                             |        |        |        |         |         |   |
| 4286   | CA  | CA  | . ARG ARG ARG B B 131 131 . | 0.1633 | 0.1666 | 0.1962 | -0.0157 | -0.0188 |   |
| 0.0024 | 1   | .   |                             |        |        |        |         |         |   |
| 4287   | CB  | CB  | . ARG ARG ARG B B 131 131 . | 0.1914 | 0.1799 | 0.2244 | -0.0302 | -0.0289 | - |
| 0.0056 | 1   | .   |                             |        |        |        |         |         |   |
| 4288   | CG  | CG  | . ARG ARG ARG B B 131 131 . | 0.2416 | 0.2281 | 0.3392 | -0.0144 | -0.0223 | - |
| 0.0041 | 1   | .   |                             |        |        |        |         |         |   |
| 4289   | CD  | CD  | . ARG ARG ARG B B 131 131 . | 0.3702 | 0.3519 | 0.4624 | -0.0597 | -0.0481 | - |
| 0.1221 | 1   | .   |                             |        |        |        |         |         |   |
| 4290   | NE  | NE  | . ARG ARG ARG B B 131 131 . | 0.4490 | 0.4190 | 0.5301 | -0.0323 | -0.0412 | - |
| 0.0872 | 1   | .   |                             |        |        |        |         |         |   |
| 4291   | CZ  | CZ  | . ARG ARG ARG B B 131 131 . | 0.5034 | 0.4949 | 0.5371 | -0.0170 | -0.0053 | - |
| 0.0537 | 1   | .   |                             |        |        |        |         |         |   |
| 4292   | NH1 | NH1 | . ARG ARG ARG B B 131 131 . | 0.5204 | 0.4842 | 0.5430 | -0.0062 | 0.0050  | - |
| 0.0378 | 1   | .   |                             |        |        |        |         |         |   |
| 4293   | NH2 | NH2 | . ARG ARG ARG B B 131 131 . | 0.5222 | 0.5448 | 0.5120 | -0.0357 | -0.0028 | - |
| 0.0419 | 1   | .   |                             |        |        |        |         |         |   |
| 4294   | C   | C   | . ARG ARG ARG B B 131 131 . | 0.1613 | 0.1704 | 0.1647 | -0.0130 | -0.0071 | - |
| 0.0063 | 1   | .   |                             |        |        |        |         |         |   |
| 4295   | O   | O   | . ARG ARG ARG B B 131 131 . | 0.1857 | 0.1743 | 0.1937 | -0.0039 | -0.0214 | - |
| 0.0253 | 1   | .   |                             |        |        |        |         |         |   |
| 4296   | N   | N   | . HIS HIS HIS B B 132 132 . | 0.1541 | 0.1371 | 0.1641 | -0.0055 | -0.0246 | - |
| 0.0138 | 1   | .   |                             |        |        |        |         |         |   |
| 4297   | CA  | CA  | . HIS HIS HIS B B 132 132 . | 0.1580 | 0.1621 | 0.1620 | -0.0185 | -0.0020 | - |
| 0.0077 | 1   | .   |                             |        |        |        |         |         |   |
| 4298   | CB  | CB  | . HIS HIS HIS B B 132 132 . | 0.1408 | 0.1424 | 0.1527 | -0.0177 | 0.0064  | - |
| 0.0306 | 1   | .   |                             |        |        |        |         |         |   |
| 4299   | CG  | CG  | . HIS HIS HIS B B 132 132 . | 0.1729 | 0.1555 | 0.1771 | 0.0097  | -0.0082 |   |
| 0.0076 | 1   | .   |                             |        |        |        |         |         |   |
| 4300   | ND1 | ND1 | . HIS HIS HIS B B 132 132 . | 0.2024 | 0.1959 | 0.1853 | 0.0139  | -0.0059 | - |
| 0.0108 | 1   | .   |                             |        |        |        |         |         |   |
| 4301   | CE1 | CE1 | . HIS HIS HIS B B 132 132 . | 0.1834 | 0.1480 | 0.1856 | 0.0001  | 0.0015  |   |
| 0.0045 | 1   | .   |                             |        |        |        |         |         |   |
| 4302   | NE2 | NE2 | . HIS HIS HIS B B 132 132 . | 0.1728 | 0.1615 | 0.1811 | 0.0080  | -0.0262 |   |
| 0.0432 | 1   | .   |                             |        |        |        |         |         |   |
| 4303   | CD2 | CD2 | . HIS HIS HIS B B 132 132 . | 0.1775 | 0.1439 | 0.1598 | 0.0025  | 0.0000  |   |
| 0.0038 | 1   | .   |                             |        |        |        |         |         |   |
| 4304   | C   | C   | . HIS HIS HIS B B 132 132 . | 0.1471 | 0.1503 | 0.1628 | -0.0063 | -0.0062 |   |
| 0.0061 | 1   | .   |                             |        |        |        |         |         |   |
| 4305   | O   | O   | . HIS HIS HIS B B 132 132 . | 0.1637 | 0.1783 | 0.1523 | -0.0226 | 0.0042  |   |
| 0.0119 | 1   | .   |                             |        |        |        |         |         |   |
| 4306   | N   | N   | . ILE ILE ILE B B 133 133 . | 0.1502 | 0.1474 | 0.1801 | -0.0248 | 0.0116  |   |
| 0.0147 | 1   | .   |                             |        |        |        |         |         |   |
| 4307   | CA  | CA  | . ILE ILE ILE B B 133 133 . | 0.1468 | 0.1576 | 0.1499 | -0.0215 | -0.0078 |   |
| 0.0153 | 1   | .   |                             |        |        |        |         |         |   |
| 4308   | CB  | CB  | . ILE ILE ILE B B 133 133 . | 0.1462 | 0.1399 | 0.1306 | -0.0272 | 0.0049  | - |
| 0.0074 | 1   | .   |                             |        |        |        |         |         |   |
| 4309   | CG1 | CG1 | . ILE ILE ILE B B 133 133 . | 0.1248 | 0.1648 | 0.1189 | -0.0012 | -0.0517 | - |
| 0.0247 | 1   | .   |                             |        |        |        |         |         |   |
| 4310   | CD1 | CD1 | . ILE ILE ILE B B 133 133 . | 0.1488 | 0.1520 | 0.1164 | -0.0073 | -0.0722 | - |
| 0.0083 | 1   | .   |                             |        |        |        |         |         |   |
| 4311   | CG2 | CG2 | . ILE ILE ILE B B 133 133 . | 0.1969 | 0.1234 | 0.1669 | -0.0063 | -0.0097 |   |
| 0.0400 | 1   | .   |                             |        |        |        |         |         |   |



|        |     |     |                             |        |        |        |         |         |   |
|--------|-----|-----|-----------------------------|--------|--------|--------|---------|---------|---|
| 4312   | C   | C   | . ILE ILE ILE B B 133 133 . | 0.1626 | 0.1604 | 0.1721 | -0.0262 | -0.0147 | - |
| 0.0034 | 1   | .   |                             |        |        |        |         |         |   |
| 4313   | O   | O   | . ILE ILE ILE B B 133 133 . | 0.1783 | 0.1472 | 0.1467 | -0.0324 | -0.0442 |   |
| 0.0106 | 1   | .   |                             |        |        |        |         |         |   |
| 4314   | N   | N   | . ALA ALA ALA B B 134 134 . | 0.1712 | 0.1606 | 0.1691 | -0.0177 | -0.0043 |   |
| 0.0026 | 1   | .   |                             |        |        |        |         |         |   |
| 4315   | CA  | CA  | . ALA ALA ALA B B 134 134 . | 0.1816 | 0.1674 | 0.1696 | 0.0001  | -0.0046 |   |
| 0.0022 | 1   | .   |                             |        |        |        |         |         |   |
| 4316   | CB  | CB  | . ALA ALA ALA B B 134 134 . | 0.1707 | 0.1537 | 0.1493 | -0.0146 | 0.0044  | - |
| 0.0030 | 1   | .   |                             |        |        |        |         |         |   |
| 4317   | C   | C   | . ALA ALA ALA B B 134 134 . | 0.1962 | 0.1804 | 0.1865 | -0.0128 | -0.0112 |   |
| 0.0021 | 1   | .   |                             |        |        |        |         |         |   |
| 4318   | O   | O   | . ALA ALA ALA B B 134 134 . | 0.2049 | 0.1975 | 0.2124 | 0.0000  | -0.0285 |   |
| 0.0027 | 1   | .   |                             |        |        |        |         |         |   |
| 4319   | N   | N   | . GLN GLN GLN B B 135 135 . | 0.1950 | 0.2054 | 0.2070 | -0.0015 | -0.0176 | - |
| 0.0098 | 1   | .   |                             |        |        |        |         |         |   |
| 4320   | CA  | CA  | . GLN GLN GLN B B 135 135 . | 0.2188 | 0.2172 | 0.2218 | 0.0073  | -0.0253 |   |
| 0.0026 | 1   | .   |                             |        |        |        |         |         |   |
| 4321   | CB  | CB  | . GLN GLN GLN B B 135 135 . | 0.2097 | 0.2142 | 0.2332 | -0.0223 | -0.0228 | - |
| 0.0097 | 1   | .   |                             |        |        |        |         |         |   |
| 4322   | CG  | CG  | . GLN GLN GLN B B 135 135 . | 0.2393 | 0.2408 | 0.2895 | -0.0065 | -0.0187 |   |
| 0.0246 | 1   | .   |                             |        |        |        |         |         |   |
| 4323   | CD  | CD  | . GLN GLN GLN B B 135 135 . | 0.3083 | 0.3130 | 0.3564 | -0.0637 | -0.0176 | - |
| 0.0029 | 1   | .   |                             |        |        |        |         |         |   |
| 4324   | OE1 | OE1 | . GLN GLN GLN B B 135 135 . | 0.2722 | 0.3108 | 0.4394 | -0.0401 | -0.0191 |   |
| 0.0091 | 1   | .   |                             |        |        |        |         |         |   |
| 4325   | NE2 | NE2 | . GLN GLN GLN B B 135 135 . | 0.4246 | 0.3405 | 0.4151 | -0.0619 | -0.0478 |   |
| 0.0113 | 1   | .   |                             |        |        |        |         |         |   |
| 4326   | C   | C   | . GLN GLN GLN B B 135 135 . | 0.2279 | 0.2177 | 0.2329 | 0.0137  | -0.0402 | - |
| 0.0024 | 1   | .   |                             |        |        |        |         |         |   |
| 4327   | O   | O   | . GLN GLN GLN B B 135 135 . | 0.2463 | 0.2325 | 0.2232 | 0.0228  | -0.0852 |   |
| 0.0033 | 1   | .   |                             |        |        |        |         |         |   |
| 4328   | N   | N   | . LEU LEU LEU B B 136 136 . | 0.2244 | 0.2073 | 0.2056 | 0.0118  | -0.0434 | - |
| 0.0109 | 1   | .   |                             |        |        |        |         |         |   |
| 4329   | CA  | CA  | . LEU LEU LEU B B 136 136 . | 0.2110 | 0.2147 | 0.2152 | 0.0057  | -0.0261 |   |
| 0.0009 | 1   | .   |                             |        |        |        |         |         |   |
| 4330   | CB  | CB  | . LEU LEU LEU B B 136 136 . | 0.2023 | 0.2027 | 0.2076 | -0.0044 | -0.0012 | - |
| 0.0161 | 1   | .   |                             |        |        |        |         |         |   |
| 4331   | CG  | CG  | . LEU LEU LEU B B 136 136 . | 0.2131 | 0.1849 | 0.1886 | 0.0051  | -0.0289 |   |
| 0.0001 | 1   | .   |                             |        |        |        |         |         |   |
| 4332   | CD1 | CD1 | . LEU LEU LEU B B 136 136 . | 0.2819 | 0.1749 | 0.1739 | -0.0050 | -0.0583 | - |
| 0.0288 | 1   | .   |                             |        |        |        |         |         |   |
| 4333   | CD2 | CD2 | . LEU LEU LEU B B 136 136 . | 0.2296 | 0.2228 | 0.1896 | 0.0201  | -0.0366 |   |
| 0.0062 | 1   | .   |                             |        |        |        |         |         |   |
| 4334   | C   | C   | . LEU LEU LEU B B 136 136 . | 0.2305 | 0.2258 | 0.2110 | 0.0152  | -0.0255 | - |
| 0.0006 | 1   | .   |                             |        |        |        |         |         |   |
| 4335   | O   | O   | . LEU LEU LEU B B 136 136 . | 0.2436 | 0.2494 | 0.2314 | 0.0286  | -0.0209 |   |
| 0.0217 | 1   | .   |                             |        |        |        |         |         |   |
| 4336   | N   | N   | . ALA ALA ALA B B 137 137 . | 0.2413 | 0.2316 | 0.2031 | -0.0066 | -0.0242 | - |
| 0.0095 | 1   | .   |                             |        |        |        |         |         |   |
| 4337   | CA  | CA  | . ALA ALA ALA B B 137 137 . | 0.2513 | 0.2395 | 0.1775 | -0.0128 | -0.0260 | - |
| 0.0225 | 1   | .   |                             |        |        |        |         |         |   |
| 4338   | CB  | CB  | . ALA ALA ALA B B 137 137 . | 0.2631 | 0.2382 | 0.1611 | -0.0163 | -0.0206 | - |
| 0.0135 | 1   | .   |                             |        |        |        |         |         |   |
| 4339   | C   | C   | . ALA ALA ALA B B 137 137 . | 0.2775 | 0.2580 | 0.1976 | -0.0199 | -0.0176 | - |
| 0.0213 | 1   | .   |                             |        |        |        |         |         |   |
| 4340   | O   | O   | . ALA ALA ALA B B 137 137 . | 0.2939 | 0.2649 | 0.1769 | -0.0357 | -0.0428 | - |
| 0.0069 | 1   | .   |                             |        |        |        |         |         |   |
| 4341   | N   | N   | . GLY GLY GLY B B 138 138 . | 0.2910 | 0.2831 | 0.2235 | -0.0244 | -0.0228 | - |
| 0.0197 | 1   | .   |                             |        |        |        |         |         |   |

|        |     |     |                             |        |        |        |         |         |   |
|--------|-----|-----|-----------------------------|--------|--------|--------|---------|---------|---|
| 4342   | CA  | CA  | . GLY GLY GLY B B 138 138 . | 0.3521 | 0.3363 | 0.2688 | -0.0218 | -0.0158 | - |
| 0.0122 | 1   | .   |                             |        |        |        |         |         |   |
| 4343   | C   | C   | . GLY GLY GLY B B 138 138 . | 0.3898 | 0.3658 | 0.3158 | -0.0189 | -0.0156 | - |
| 0.0070 | 1   | .   |                             |        |        |        |         |         |   |
| 4344   | O   | O   | . GLY GLY GLY B B 138 138 . | 0.4391 | 0.3951 | 0.3119 | -0.0269 | -0.0400 | - |
| 0.0061 | 1   | .   |                             |        |        |        |         |         |   |
| 4345   | N   | N   | . ASN ASN ASN B B 139 139 . | 0.3873 | 0.3739 | 0.3320 | -0.0223 | -0.0256 | - |
| 0.0050 | 1   | .   |                             |        |        |        |         |         |   |
| 4346   | CA  | CA  | . ASN ASN ASN B B 139 139 . | 0.3950 | 0.3917 | 0.3539 | -0.0293 | -0.0153 | - |
| 0.0023 | 1   | .   |                             |        |        |        |         |         |   |
| 4347   | CB  | CB  | . ASN ASN ASN B B 139 139 . | 0.3908 | 0.4008 | 0.3568 | -0.0426 | -0.0177 | - |
| 0.0108 | 1   | .   |                             |        |        |        |         |         |   |
| 4348   | CG  | CG  | . ASN ASN ASN B B 139 139 . | 0.4033 | 0.4435 | 0.3380 | -0.0616 | -0.0343 | - |
| 0.0253 | 1   | .   |                             |        |        |        |         |         |   |
| 4349   | OD1 | OD1 | . ASN ASN ASN B B 139 139 . | 0.3975 | 0.5528 | 0.3307 | -0.1408 | -0.0969 | - |
| 0.0123 | 1   | .   |                             |        |        |        |         |         |   |
| 4350   | ND2 | ND2 | . ASN ASN ASN B B 139 139 . | 0.4101 | 0.3982 | 0.2142 | -0.0357 | -0.0391 | - |
| 0.0693 | 1   | .   |                             |        |        |        |         |         |   |
| 4351   | C   | C   | . ASN ASN ASN B B 139 139 . | 0.4138 | 0.3962 | 0.3855 | -0.0268 | -0.0119 | - |
| 0.0107 | 1   | .   |                             |        |        |        |         |         |   |
| 4352   | O   | O   | . ASN ASN ASN B B 139 139 . | 0.4119 | 0.3696 | 0.3513 | -0.0353 | -0.0138 | - |
| 0.0234 | 1   | .   |                             |        |        |        |         |         |   |
| 4353   | N   | N   | . SER SER SER B B 140 140 . | 0.4358 | 0.4385 | 0.4200 | -0.0133 | 0.0007  | - |
| 0.0124 | 1   | .   |                             |        |        |        |         |         |   |
| 4354   | CA  | CA  | . SER SER SER B B 140 140 . | 0.4668 | 0.4628 | 0.4549 | -0.0040 | -0.0067 | - |
| 0.0115 | 1   | .   |                             |        |        |        |         |         |   |
| 4355   | CB  | CB  | . SER SER SER B B 140 140 . | 0.4650 | 0.4765 | 0.4880 | -0.0055 | -0.0111 | - |
| 0.0158 | 1   | .   |                             |        |        |        |         |         |   |
| 4356   | OG  | OG  | . SER SER SER B B 140 140 . | 0.4558 | 0.5291 | 0.5155 | -0.0012 | -0.0334 | - |
| 0.0280 | 1   | .   |                             |        |        |        |         |         |   |
| 4357   | C   | C   | . SER SER SER B B 140 140 . | 0.4847 | 0.4737 | 0.4640 | -0.0006 | -0.0037 | - |
| 0.0022 | 1   | .   |                             |        |        |        |         |         |   |
| 4358   | O   | O   | . SER SER SER B B 140 140 . | 0.5259 | 0.4904 | 0.4943 | -0.0118 | 0.0017  | - |
| 0.0051 | 1   | .   |                             |        |        |        |         |         |   |
| 4359   | N   | N   | . ASP ASP ASP B B 141 141 . | 0.4700 | 0.4634 | 0.4642 | -0.0030 | -0.0033 | - |
| 0.0017 | 1   | .   |                             |        |        |        |         |         |   |
| 4360   | CA  | CA  | . ASP ASP ASP B B 141 141 . | 0.4607 | 0.4463 | 0.4401 | 0.0006  | -0.0101 | - |
| 0.0021 | 1   | .   |                             |        |        |        |         |         |   |
| 4361   | CB  | CB  | . ASP ASP ASP B B 141 141 . | 0.4733 | 0.4466 | 0.4674 | 0.0068  | 0.0089  | - |
| 0.0026 | 1   | .   |                             |        |        |        |         |         |   |
| 4362   | C   | C   | . ASP ASP ASP B B 141 141 . | 0.4422 | 0.4255 | 0.4349 | 0.0061  | -0.0094 | - |
| 0.0003 | 1   | .   |                             |        |        |        |         |         |   |
| 4363   | O   | O   | . ASP ASP ASP B B 141 141 . | 0.4570 | 0.4429 | 0.4484 | -0.0019 | -0.0198 | - |
| 0.0144 | 1   | .   |                             |        |        |        |         |         |   |
| 4364   | N   | N   | . LEU LEU LEU B B 142 142 . | 0.3904 | 0.3858 | 0.3586 | 0.0053  | -0.0174 | - |
| 0.0011 | 1   | .   |                             |        |        |        |         |         |   |
| 4365   | CA  | CA  | . LEU LEU LEU B B 142 142 . | 0.3354 | 0.2934 | 0.3282 | -0.0103 | -0.0091 | - |
| 0.0151 | 1   | .   |                             |        |        |        |         |         |   |
| 4366   | CB  | CB  | . LEU LEU LEU B B 142 142 . | 0.3380 | 0.2831 | 0.2889 | 0.0084  | -0.0126 | - |
| 0.0363 | 1   | .   |                             |        |        |        |         |         |   |
| 4367   | CG  | CG  | . LEU LEU LEU B B 142 142 . | 0.2910 | 0.2467 | 0.3237 | -0.0142 | -0.0339 | - |
| 0.0192 | 1   | .   |                             |        |        |        |         |         |   |
| 4368   | CD1 | CD1 | . LEU LEU LEU B B 142 142 . | 0.3053 | 0.2133 | 0.2566 | 0.0223  | -0.0161 | - |
| 0.0552 | 1   | .   |                             |        |        |        |         |         |   |
| 4369   | CD2 | CD2 | . LEU LEU LEU B B 142 142 . | 0.3127 | 0.2528 | 0.3645 | 0.0061  | -0.0677 | - |
| 0.0239 | 1   | .   |                             |        |        |        |         |         |   |
| 4370   | C   | C   | . LEU LEU LEU B B 142 142 . | 0.3209 | 0.2887 | 0.3010 | -0.0036 | -0.0108 | - |
| 0.0090 | 1   | .   |                             |        |        |        |         |         |   |
| 4371   | O   | O   | . LEU LEU LEU B B 142 142 . | 0.3229 | 0.3224 | 0.2798 | -0.0111 | -0.0092 | - |
| 0.0237 | 1   | .   |                             |        |        |        |         |         |   |

|        |     |     |                             |        |        |        |         |         |   |
|--------|-----|-----|-----------------------------|--------|--------|--------|---------|---------|---|
| 4372   | N   | N   | . ILE ILE ILE B B 143 143 . | 0.2745 | 0.2502 | 0.2507 | -0.0021 | -0.0104 |   |
| 0.0078 | 1   | .   |                             |        |        |        |         |         |   |
| 4373   | CA  | CA  | . ILE ILE ILE B B 143 143 . | 0.2818 | 0.2522 | 0.2361 | -0.0011 | -0.0173 |   |
| 0.0113 | 1   | .   |                             |        |        |        |         |         |   |
| 4374   | CB  | CB  | . ILE ILE ILE B B 143 143 . | 0.2971 | 0.2870 | 0.2614 | -0.0050 | 0.0019  |   |
| 0.0143 | 1   | .   |                             |        |        |        |         |         |   |
| 4375   | CG1 | CG1 | . ILE ILE ILE B B 143 143 . | 0.3120 | 0.3584 | 0.2853 | 0.0104  | -0.0270 |   |
| 0.0045 | 1   | .   |                             |        |        |        |         |         |   |
| 4376   | CD1 | CD1 | . ILE ILE ILE B B 143 143 . | 0.3501 | 0.2599 | 0.3292 | -0.0574 | -0.0468 | - |
| 0.0396 | 1   | .   |                             |        |        |        |         |         |   |
| 4377   | CG2 | CG2 | . ILE ILE ILE B B 143 143 . | 0.3798 | 0.2972 | 0.2862 | -0.0145 | -0.0158 |   |
| 0.0106 | 1   | .   |                             |        |        |        |         |         |   |
| 4378   | C   | C   | . ILE ILE ILE B B 143 143 . | 0.2506 | 0.2120 | 0.2090 | 0.0083  | -0.0161 |   |
| 0.0104 | 1   | .   |                             |        |        |        |         |         |   |
| 4379   | O   | O   | . ILE ILE ILE B B 143 143 . | 0.2629 | 0.1868 | 0.1951 | 0.0172  | -0.0226 |   |
| 0.0325 | 1   | .   |                             |        |        |        |         |         |   |
| 4380   | N   | N   | . LEU LEU LEU B B 144 144 . | 0.2195 | 0.2047 | 0.1898 | 0.0122  | -0.0182 | - |
| 0.0061 | 1   | .   |                             |        |        |        |         |         |   |
| 4381   | CA  | CA  | . LEU LEU LEU B B 144 144 . | 0.1851 | 0.1676 | 0.1677 | -0.0080 | -0.0030 |   |
| 0.0018 | 1   | .   |                             |        |        |        |         |         |   |
| 4382   | CB  | CB  | . LEU LEU LEU B B 144 144 . | 0.1777 | 0.1810 | 0.1573 | 0.0092  | 0.0010  |   |
| 0.0063 | 1   | .   |                             |        |        |        |         |         |   |
| 4383   | CG  | CG  | . LEU LEU LEU B B 144 144 . | 0.1856 | 0.1906 | 0.1450 | -0.0229 | 0.0111  |   |
| 0.0004 | 1   | .   |                             |        |        |        |         |         |   |
| 4384   | CD1 | CD1 | . LEU LEU LEU B B 144 144 . | 0.2489 | 0.1946 | 0.1220 | 0.0441  | 0.0319  |   |
| 0.0106 | 1   | .   |                             |        |        |        |         |         |   |
| 4385   | CD2 | CD2 | . LEU LEU LEU B B 144 144 . | 0.2187 | 0.1900 | 0.1929 | -0.0441 | -0.0260 | - |
| 0.0044 | 1   | .   |                             |        |        |        |         |         |   |
| 4386   | C   | C   | . LEU LEU LEU B B 144 144 . | 0.1715 | 0.1520 | 0.1398 | -0.0029 | 0.0000  |   |
| 0.0026 | 1   | .   |                             |        |        |        |         |         |   |
| 4387   | O   | O   | . LEU LEU LEU B B 144 144 . | 0.1999 | 0.1404 | 0.1129 | 0.0000  | 0.0104  | - |
| 0.0018 | 1   | .   |                             |        |        |        |         |         |   |
| 4388   | N   | N   | . PRO PRO PRO B B 145 145 . | 0.1604 | 0.1369 | 0.1113 | 0.0002  | 0.0140  | - |
| 0.0050 | 1   | .   |                             |        |        |        |         |         |   |
| 4389   | CA  | CA  | . PRO PRO PRO B B 145 145 . | 0.1460 | 0.1004 | 0.1210 | -0.0001 | -0.0012 | - |
| 0.0150 | 1   | .   |                             |        |        |        |         |         |   |
| 4390   | CB  | CB  | . PRO PRO PRO B B 145 145 . | 0.1658 | 0.1055 | 0.0816 | 0.0094  | 0.0293  | - |
| 0.0160 | 1   | .   |                             |        |        |        |         |         |   |
| 4391   | CG  | CG  | . PRO PRO PRO B B 145 145 . | 0.1312 | 0.1085 | 0.0831 | -0.0058 | 0.0074  | - |
| 0.0198 | 1   | .   |                             |        |        |        |         |         |   |
| 4392   | CD  | CD  | . PRO PRO PRO B B 145 145 . | 0.1553 | 0.1270 | 0.0975 | -0.0047 | 0.0065  | - |
| 0.0217 | 1   | .   |                             |        |        |        |         |         |   |
| 4393   | C   | C   | . PRO PRO PRO B B 145 145 . | 0.1573 | 0.0905 | 0.1104 | 0.0015  | 0.0077  | - |
| 0.0203 | 1   | .   |                             |        |        |        |         |         |   |
| 4394   | O   | O   | . PRO PRO PRO B B 145 145 . | 0.1534 | 0.1078 | 0.1078 | 0.0250  | -0.0052 | - |
| 0.0021 | 1   | .   |                             |        |        |        |         |         |   |
| 4395   | N   | N   | . VAL VAL VAL B B 146 146 . | 0.1383 | 0.0803 | 0.0877 | 0.0048  | 0.0074  | - |
| 0.0069 | 1   | .   |                             |        |        |        |         |         |   |
| 4396   | CA  | CA  | . VAL VAL VAL B B 146 146 . | 0.1365 | 0.0762 | 0.0858 | 0.0062  | -0.0002 | - |
| 0.0131 | 1   | .   |                             |        |        |        |         |         |   |
| 4397   | CB  | CB  | . VAL VAL VAL B B 146 146 . | 0.1276 | 0.1002 | 0.1005 | 0.0107  | -0.0011 | - |
| 0.0246 | 1   | .   |                             |        |        |        |         |         |   |
| 4398   | CG1 | CG1 | . VAL VAL VAL B B 146 146 . | 0.1584 | 0.1549 | 0.1231 | 0.0154  | 0.0018  | - |
| 0.0117 | 1   | .   |                             |        |        |        |         |         |   |
| 4399   | CG2 | CG2 | . VAL VAL VAL B B 146 146 . | 0.2020 | 0.1451 | 0.1619 | 0.0068  | 0.0107  | - |
| 0.0310 | 1   | .   |                             |        |        |        |         |         |   |
| 4400   | C   | C   | . VAL VAL VAL B B 146 146 . | 0.1558 | 0.1187 | 0.1025 | 0.0153  | -0.0165 | - |
| 0.0082 | 1   | .   |                             |        |        |        |         |         |   |
| 4401   | O   | O   | . VAL VAL VAL B B 146 146 . | 0.1553 | 0.1040 | 0.0803 | 0.0244  | -0.0096 | - |
| 0.0121 | 1   | .   |                             |        |        |        |         |         |   |

|        |     |     |                             |        |        |        |         |         |   |
|--------|-----|-----|-----------------------------|--------|--------|--------|---------|---------|---|
| 4402   | N   | N   | . PRO PRO PRO B B 147 147 . | 0.1720 | 0.1209 | 0.1049 | 0.0269  | -0.0191 | - |
| 0.0095 | 1   | .   |                             |        |        |        |         |         |   |
| 4403   | CA  | CA  | . PRO PRO PRO B B 147 147 . | 0.1470 | 0.1059 | 0.1217 | 0.0220  | -0.0192 | - |
| 0.0026 | 1   | .   |                             |        |        |        |         |         |   |
| 4404   | CB  | CB  | . PRO PRO PRO B B 147 147 . | 0.1690 | 0.0926 | 0.1238 | 0.0280  | -0.0074 | - |
| 0.0132 | 1   | .   |                             |        |        |        |         |         |   |
| 4405   | CG  | CG  | . PRO PRO PRO B B 147 147 . | 0.1736 | 0.0637 | 0.0930 | -0.0039 | -0.0228 | - |
| 0.0355 | 1   | .   |                             |        |        |        |         |         |   |
| 4406   | CD  | CD  | . PRO PRO PRO B B 147 147 . | 0.1643 | 0.1086 | 0.1133 | 0.0345  | -0.0389 | - |
| 0.0059 | 1   | .   |                             |        |        |        |         |         |   |
| 4407   | C   | C   | . PRO PRO PRO B B 147 147 . | 0.1520 | 0.1207 | 0.1204 | 0.0328  | -0.0100 |   |
| 0.0111 | 1   | .   |                             |        |        |        |         |         |   |
| 4408   | O   | O   | . PRO PRO PRO B B 147 147 . | 0.1478 | 0.1195 | 0.1218 | 0.0358  | 0.0221  |   |
| 0.0064 | 1   | .   |                             |        |        |        |         |         |   |
| 4409   | N   | N   | . ALA ALA ALA B B 148 148 . | 0.1557 | 0.1153 | 0.1083 | 0.0264  | -0.0047 |   |
| 0.0070 | 1   | .   |                             |        |        |        |         |         |   |
| 4410   | CA  | CA  | . ALA ALA ALA B B 148 148 . | 0.1346 | 0.1264 | 0.1112 | 0.0197  | -0.0173 |   |
| 0.0106 | 1   | .   |                             |        |        |        |         |         |   |
| 4411   | CB  | CB  | . ALA ALA ALA B B 148 148 . | 0.1292 | 0.1081 | 0.0653 | 0.0396  | -0.0002 |   |
| 0.0068 | 1   | .   |                             |        |        |        |         |         |   |
| 4412   | C   | C   | . ALA ALA ALA B B 148 148 . | 0.1371 | 0.1257 | 0.1040 | 0.0293  | -0.0056 |   |
| 0.0100 | 1   | .   |                             |        |        |        |         |         |   |
| 4413   | O   | O   | . ALA ALA ALA B B 148 148 . | 0.1311 | 0.1440 | 0.1426 | 0.0463  | -0.0134 |   |
| 0.0106 | 1   | .   |                             |        |        |        |         |         |   |
| 4414   | N   | N   | . PHE PHE PHE B B 149 149 . | 0.1114 | 0.1529 | 0.0876 | 0.0174  | -0.0241 |   |
| 0.0234 | 1   | .   |                             |        |        |        |         |         |   |
| 4415   | CA  | CA  | . PHE PHE PHE B B 149 149 . | 0.1222 | 0.1257 | 0.1003 | 0.0428  | -0.0088 |   |
| 0.0028 | 1   | .   |                             |        |        |        |         |         |   |
| 4416   | CB  | CB  | . PHE PHE PHE B B 149 149 . | 0.1277 | 0.1125 | 0.1181 | 0.0528  | -0.0092 |   |
| 0.0158 | 1   | .   |                             |        |        |        |         |         |   |
| 4417   | CG  | CG  | . PHE PHE PHE B B 149 149 . | 0.1599 | 0.1421 | 0.1124 | 0.0382  | 0.0026  |   |
| 0.0059 | 1   | .   |                             |        |        |        |         |         |   |
| 4418   | CD1 | CD1 | . PHE PHE PHE B B 149 149 . | 0.1562 | 0.0934 | 0.1084 | 0.0465  | 0.0152  |   |
| 0.0542 | 1   | .   |                             |        |        |        |         |         |   |
| 4419   | CE1 | CE1 | . PHE PHE PHE B B 149 149 . | 0.1444 | 0.1613 | 0.0795 | 0.0231  | -0.0009 |   |
| 0.0018 | 1   | .   |                             |        |        |        |         |         |   |
| 4420   | CZ  | CZ  | . PHE PHE PHE B B 149 149 . | 0.1761 | 0.1530 | 0.1369 | 0.0602  | 0.0173  |   |
| 0.0099 | 1   | .   |                             |        |        |        |         |         |   |
| 4421   | CE2 | CE2 | . PHE PHE PHE B B 149 149 . | 0.1337 | 0.1315 | 0.1091 | 0.0230  | -0.0077 |   |
| 0.0108 | 1   | .   |                             |        |        |        |         |         |   |
| 4422   | CD2 | CD2 | . PHE PHE PHE B B 149 149 . | 0.1913 | 0.1140 | 0.1269 | 0.0454  | -0.0034 | - |
| 0.0178 | 1   | .   |                             |        |        |        |         |         |   |
| 4423   | C   | C   | . PHE PHE PHE B B 149 149 . | 0.1514 | 0.1453 | 0.1311 | 0.0345  | 0.0017  |   |
| 0.0063 | 1   | .   |                             |        |        |        |         |         |   |
| 4424   | O   | O   | . PHE PHE PHE B B 149 149 . | 0.1431 | 0.1344 | 0.1313 | 0.0533  | 0.0152  |   |
| 0.0053 | 1   | .   |                             |        |        |        |         |         |   |
| 4425   | N   | N   | . ASN ASN ASN B B 150 150 . | 0.1520 | 0.1254 | 0.1018 | 0.0256  | 0.0001  |   |
| 0.0039 | 1   | .   |                             |        |        |        |         |         |   |
| 4426   | CA  | CA  | . ASN ASN ASN B B 150 150 . | 0.1609 | 0.1775 | 0.1459 | 0.0218  | 0.0057  | - |
| 0.0008 | 1   | .   |                             |        |        |        |         |         |   |
| 4427   | CB  | CB  | . ASN ASN ASN B B 150 150 . | 0.2022 | 0.1748 | 0.1257 | 0.0114  | 0.0278  | - |
| 0.0041 | 1   | .   |                             |        |        |        |         |         |   |
| 4428   | CG  | CG  | . ASN ASN ASN B B 150 150 . | 0.2296 | 0.1974 | 0.1685 | 0.0256  | 0.0327  |   |
| 0.0093 | 1   | .   |                             |        |        |        |         |         |   |
| 4429   | OD1 | OD1 | . ASN ASN ASN B B 150 150 . | 0.4367 | 0.2517 | 0.2201 | 0.0825  | 0.0255  |   |
| 0.0370 | 1   | .   |                             |        |        |        |         |         |   |
| 4430   | ND2 | ND2 | . ASN ASN ASN B B 150 150 . | 0.1794 | 0.1530 | 0.1350 | 0.0594  | 0.0078  |   |
| 0.0507 | 1   | .   |                             |        |        |        |         |         |   |
| 4431   | C   | C   | . ASN ASN ASN B B 150 150 . | 0.1629 | 0.1954 | 0.1307 | 0.0103  | -0.0026 | - |
| 0.0027 | 1   | .   |                             |        |        |        |         |         |   |

|        |     |     |                             |        |        |        |         |         |   |
|--------|-----|-----|-----------------------------|--------|--------|--------|---------|---------|---|
| 4432   | O   | O   | . ASN ASN ASN B B 150 150 . | 0.1851 | 0.2569 | 0.1588 | 0.0089  | 0.0281  |   |
| 0.0217 | 1   | .   |                             |        |        |        |         |         |   |
| 4433   | N   | N   | . VAL VAL VAL B B 151 151 . | 0.1494 | 0.1685 | 0.1101 | 0.0409  | -0.0101 | - |
| 0.0148 | 1   | .   |                             |        |        |        |         |         |   |
| 4434   | CA  | CA  | . VAL VAL VAL B B 151 151 . | 0.1685 | 0.1728 | 0.1372 | 0.0426  | -0.0032 | - |
| 0.0092 | 1   | .   |                             |        |        |        |         |         |   |
| 4435   | CB  | CB  | . VAL VAL VAL B B 151 151 . | 0.1652 | 0.1813 | 0.1402 | 0.0453  | -0.0210 |   |
| 0.0038 | 1   | .   |                             |        |        |        |         |         |   |
| 4436   | CG1 | CG1 | . VAL VAL VAL B B 151 151 . | 0.1962 | 0.1971 | 0.1740 | 0.0132  | -0.0082 |   |
| 0.0281 | 1   | .   |                             |        |        |        |         |         |   |
| 4437   | CG2 | CG2 | . VAL VAL VAL B B 151 151 . | 0.1598 | 0.1954 | 0.1656 | 0.0630  | 0.0063  | - |
| 0.0046 | 1   | .   |                             |        |        |        |         |         |   |
| 4438   | C   | C   | . VAL VAL VAL B B 151 151 . | 0.1796 | 0.1985 | 0.1548 | 0.0562  | -0.0012 | - |
| 0.0195 | 1   | .   |                             |        |        |        |         |         |   |
| 4439   | O   | O   | . VAL VAL VAL B B 151 151 . | 0.1820 | 0.2052 | 0.1421 | 0.0732  | -0.0067 | - |
| 0.0517 | 1   | .   |                             |        |        |        |         |         |   |
| 4440   | N   | N   | . ILE ILE ILE B B 152 152 . | 0.1838 | 0.1690 | 0.1434 | 0.0531  | -0.0015 | - |
| 0.0108 | 1   | .   |                             |        |        |        |         |         |   |
| 4441   | CA  | CA  | . ILE ILE ILE B B 152 152 . | 0.2229 | 0.2155 | 0.2069 | 0.0548  | -0.0112 | - |
| 0.0204 | 1   | .   |                             |        |        |        |         |         |   |
| 4442   | CB  | CB  | . ILE ILE ILE B B 152 152 . | 0.2032 | 0.2006 | 0.2339 | 0.0459  | -0.0169 |   |
| 0.0082 | 1   | .   |                             |        |        |        |         |         |   |
| 4443   | CG1 | CG1 | . ILE ILE ILE B B 152 152 . | 0.2469 | 0.2164 | 0.2405 | 0.0442  | 0.0532  | - |
| 0.0092 | 1   | .   |                             |        |        |        |         |         |   |
| 4444   | CD1 | CD1 | . ILE ILE ILE B B 152 152 . | 0.1811 | 0.1412 | 0.2550 | -0.0183 | 0.0343  |   |
| 0.0608 | 1   | .   |                             |        |        |        |         |         |   |
| 4445   | CG2 | CG2 | . ILE ILE ILE B B 152 152 . | 0.2499 | 0.2270 | 0.2484 | 0.0393  | -0.0138 | - |
| 0.0489 | 1   | .   |                             |        |        |        |         |         |   |
| 4446   | C   | C   | . ILE ILE ILE B B 152 152 . | 0.2475 | 0.2375 | 0.2369 | 0.0679  | -0.0291 | - |
| 0.0150 | 1   | .   |                             |        |        |        |         |         |   |
| 4447   | O   | O   | . ILE ILE ILE B B 152 152 . | 0.2335 | 0.2037 | 0.2340 | 0.0501  | -0.0821 | - |
| 0.0384 | 1   | .   |                             |        |        |        |         |         |   |
| 4448   | N   | N   | . ASN ASN ASN B B 153 153 . | 0.2769 | 0.2555 | 0.2499 | 0.0691  | -0.0376 | - |
| 0.0409 | 1   | .   |                             |        |        |        |         |         |   |
| 4449   | CA  | CA  | . ASN ASN ASN B B 153 153 . | 0.3000 | 0.2847 | 0.2783 | 0.0632  | -0.0248 | - |
| 0.0156 | 1   | .   |                             |        |        |        |         |         |   |
| 4450   | CB  | CB  | . ASN ASN ASN B B 153 153 . | 0.3076 | 0.2858 | 0.3044 | 0.0400  | 0.0012  | - |
| 0.0156 | 1   | .   |                             |        |        |        |         |         |   |
| 4451   | CG  | CG  | . ASN ASN ASN B B 153 153 . | 0.3379 | 0.3247 | 0.2848 | 0.0262  | 0.0034  | - |
| 0.0061 | 1   | .   |                             |        |        |        |         |         |   |
| 4452   | OD1 | OD1 | . ASN ASN ASN B B 153 153 . | 0.4022 | 0.3591 | 0.4124 | 0.0334  | -0.0784 | - |
| 0.0213 | 1   | .   |                             |        |        |        |         |         |   |
| 4453   | ND2 | ND2 | . ASN ASN ASN B B 153 153 . | 0.0772 | 0.1432 | 0.1450 | -0.0201 | 0.0607  |   |
| 0.0497 | 1   | .   |                             |        |        |        |         |         |   |
| 4454   | C   | C   | . ASN ASN ASN B B 153 153 . | 0.2729 | 0.2590 | 0.2714 | 0.0590  | -0.0407 | - |
| 0.0235 | 1   | .   |                             |        |        |        |         |         |   |
| 4455   | O   | O   | . ASN ASN ASN B B 153 153 . | 0.2985 | 0.2693 | 0.2901 | 0.0828  | -0.0479 | - |
| 0.0453 | 1   | .   |                             |        |        |        |         |         |   |
| 4456   | N   | N   | . GLY GLY GLY B B 154 154 . | 0.2546 | 0.2636 | 0.1987 | 0.0567  | -0.0539 | - |
| 0.0248 | 1   | .   |                             |        |        |        |         |         |   |
| 4457   | CA  | CA  | . GLY GLY GLY B B 154 154 . | 0.1947 | 0.2259 | 0.1802 | 0.0696  | -0.0502 | - |
| 0.0328 | 1   | .   |                             |        |        |        |         |         |   |
| 4458   | C   | C   | . GLY GLY GLY B B 154 154 . | 0.1844 | 0.2088 | 0.1630 | 0.0427  | -0.0357 | - |
| 0.0333 | 1   | .   |                             |        |        |        |         |         |   |
| 4459   | O   | O   | . GLY GLY GLY B B 154 154 . | 0.1975 | 0.1728 | 0.1363 | 0.0840  | -0.0351 | - |
| 0.0610 | 1   | .   |                             |        |        |        |         |         |   |
| 4460   | N   | N   | . GLY GLY GLY B B 155 155 . | 0.1815 | 0.1807 | 0.1385 | 0.0329  | -0.0683 | - |
| 0.0693 | 1   | .   |                             |        |        |        |         |         |   |
| 4461   | N   | N   | . GLY GLY GLY B B 159 159 . | 0.2274 | 0.2860 | 0.2162 | -0.0210 | 0.0407  | - |
| 0.0506 | 1   | .   |                             |        |        |        |         |         |   |

|        |     |     |                             |        |        |        |         |         |   |
|--------|-----|-----|-----------------------------|--------|--------|--------|---------|---------|---|
| 4462   | CA  | CA  | . GLY GLY GLY B B 159 159 . | 0.2589 | 0.3237 | 0.2563 | 0.0045  | 0.0112  | - |
| 0.0293 | 1   | .   |                             |        |        |        |         |         |   |
| 4463   | C   | C   | . GLY GLY GLY B B 159 159 . | 0.2866 | 0.3255 | 0.2686 | 0.0050  | 0.0034  | - |
| 0.0146 | 1   | .   |                             |        |        |        |         |         |   |
| 4464   | O   | O   | . GLY GLY GLY B B 159 159 . | 0.2485 | 0.3047 | 0.2286 | 0.0186  | -0.0134 | - |
| 0.0029 | 1   | .   |                             |        |        |        |         |         |   |
| 4465   | N   | N   | . ASN ASN ASN B B 160 160 . | 0.3051 | 0.3064 | 0.2898 | 0.0204  | -0.0250 | - |
| 0.0091 | 1   | .   |                             |        |        |        |         |         |   |
| 4466   | CA  | CA  | . ASN ASN ASN B B 160 160 . | 0.2779 | 0.3028 | 0.2746 | 0.0167  | -0.0332 | - |
| 0.0246 | 1   | .   |                             |        |        |        |         |         |   |
| 4467   | CB  | CB  | . ASN ASN ASN B B 160 160 . | 0.2868 | 0.3040 | 0.2845 | 0.0218  | -0.0574 | - |
| 0.0383 | 1   | .   |                             |        |        |        |         |         |   |
| 4468   | CG  | CG  | . ASN ASN ASN B B 160 160 . | 0.3183 | 0.3107 | 0.3462 | 0.0506  | -0.0741 | - |
| 0.0413 | 1   | .   |                             |        |        |        |         |         |   |
| 4469   | OD1 | OD1 | . ASN ASN ASN B B 160 160 . | 0.3212 | 0.3976 | 0.3316 | 0.1468  | -0.1567 | - |
| 0.0806 | 1   | .   |                             |        |        |        |         |         |   |
| 4470   | ND2 | ND2 | . ASN ASN ASN B B 160 160 . | 0.3057 | 0.3469 | 0.3860 | 0.0679  | -0.1480 | - |
| 0.1662 | 1   | .   |                             |        |        |        |         |         |   |
| 4471   | C   | C   | . ASN ASN ASN B B 160 160 . | 0.2850 | 0.2992 | 0.2876 | -0.0013 | -0.0286 | - |
| 0.0496 | 1   | .   |                             |        |        |        |         |         |   |
| 4472   | O   | O   | . ASN ASN ASN B B 160 160 . | 0.2904 | 0.3138 | 0.2617 | 0.0208  | -0.0298 | - |
| 0.0843 | 1   | .   |                             |        |        |        |         |         |   |
| 4473   | N   | N   | . LYS LYS LYS B B 161 161 . | 0.2255 | 0.2929 | 0.2647 | -0.0207 | -0.0193 | - |
| 0.0599 | 1   | .   |                             |        |        |        |         |         |   |
| 4474   | CA  | CA  | . LYS LYS LYS B B 161 161 . | 0.2427 | 0.2965 | 0.2613 | -0.0216 | -0.0548 | - |
| 0.0554 | 1   | .   |                             |        |        |        |         |         |   |
| 4475   | CB  | CB  | . LYS LYS LYS B B 161 161 . | 0.2457 | 0.3181 | 0.2911 | -0.0169 | -0.0331 | - |
| 0.0662 | 1   | .   |                             |        |        |        |         |         |   |
| 4476   | CG  | CG  | . LYS LYS LYS B B 161 161 . | 0.3441 | 0.3570 | 0.3358 | -0.0267 | -0.0633 | - |
| 0.0687 | 1   | .   |                             |        |        |        |         |         |   |
| 4477   | CD  | CD  | . LYS LYS LYS B B 161 161 . | 0.4843 | 0.4134 | 0.4193 | -0.0196 | -0.0719 | - |
| 0.0221 | 1   | .   |                             |        |        |        |         |         |   |
| 4478   | CE  | CE  | . LYS LYS LYS B B 161 161 . | 0.5175 | 0.4844 | 0.4645 | -0.0165 | -0.0784 | - |
| 0.0400 | 1   | .   |                             |        |        |        |         |         |   |
| 4479   | NZ  | NZ  | . LYS LYS LYS B B 161 161 . | 0.5243 | 0.4742 | 0.4512 | 0.0243  | -0.0736 | - |
| 0.0369 | 1   | .   |                             |        |        |        |         |         |   |
| 4480   | C   | C   | . LYS LYS LYS B B 161 161 . | 0.2530 | 0.2958 | 0.2619 | -0.0102 | -0.0428 | - |
| 0.0446 | 1   | .   |                             |        |        |        |         |         |   |
| 4481   | O   | O   | . LYS LYS LYS B B 161 161 . | 0.2602 | 0.3085 | 0.2941 | -0.0111 | -0.0760 | - |
| 0.0641 | 1   | .   |                             |        |        |        |         |         |   |
| 4482   | N   | N   | . LEU LEU LEU B B 162 162 . | 0.2440 | 0.2788 | 0.2320 | 0.0170  | -0.0502 | - |
| 0.0462 | 1   | .   |                             |        |        |        |         |         |   |
| 4483   | CA  | CA  | . LEU LEU LEU B B 162 162 . | 0.2137 | 0.2508 | 0.2489 | 0.0252  | -0.0624 | - |
| 0.0516 | 1   | .   |                             |        |        |        |         |         |   |
| 4484   | CB  | CB  | . LEU LEU LEU B B 162 162 . | 0.2231 | 0.2590 | 0.1896 | 0.0396  | -0.0559 | - |
| 0.0512 | 1   | .   |                             |        |        |        |         |         |   |
| 4485   | CG  | CG  | . LEU LEU LEU B B 162 162 . | 0.1978 | 0.2447 | 0.2611 | 0.0082  | -0.0825 | - |
| 0.0452 | 1   | .   |                             |        |        |        |         |         |   |
| 4486   | CD1 | CD1 | . LEU LEU LEU B B 162 162 . | 0.1807 | 0.2547 | 0.2693 | 0.0767  | -0.0974 | - |
| 0.0906 | 1   | .   |                             |        |        |        |         |         |   |
| 4487   | CD2 | CD2 | . LEU LEU LEU B B 162 162 . | 0.2515 | 0.2504 | 0.2315 | 0.0600  | -0.0653 | - |
| 0.0570 | 1   | .   |                             |        |        |        |         |         |   |
| 4488   | C   | C   | . LEU LEU LEU B B 162 162 . | 0.2015 | 0.2346 | 0.2339 | 0.0265  | -0.0462 | - |
| 0.0412 | 1   | .   |                             |        |        |        |         |         |   |
| 4489   | O   | O   | . LEU LEU LEU B B 162 162 . | 0.2309 | 0.2292 | 0.2545 | 0.0305  | -0.0832 | - |
| 0.0322 | 1   | .   |                             |        |        |        |         |         |   |
| 4490   | N   | N   | . ALA ALA ALA B B 163 163 . | 0.1814 | 0.1825 | 0.2617 | 0.0331  | -0.0469 | - |
| 0.0574 | 1   | .   |                             |        |        |        |         |         |   |
| 4491   | CA  | CA  | . ALA ALA ALA B B 163 163 . | 0.1768 | 0.2070 | 0.2375 | 0.0178  | -0.0454 | - |
| 0.0360 | 1   | .   |                             |        |        |        |         |         |   |

|        |     |     |                             |        |        |        |         |         |   |
|--------|-----|-----|-----------------------------|--------|--------|--------|---------|---------|---|
| 4492   | CB  | CB  | . ALA ALA ALA B B 163 163 . | 0.1557 | 0.2185 | 0.2407 | -0.0050 | -0.0455 | - |
| 0.0224 | 1   | .   |                             |        |        |        |         |         |   |
| 4493   | C   | C   | . ALA ALA ALA B B 163 163 . | 0.1752 | 0.1900 | 0.2032 | 0.0122  | -0.0271 | - |
| 0.0431 | 1   | .   |                             |        |        |        |         |         |   |
| 4494   | O   | O   | . ALA ALA ALA B B 163 163 . | 0.1928 | 0.2058 | 0.1926 | 0.0400  | -0.0471 | - |
| 0.0303 | 1   | .   |                             |        |        |        |         |         |   |
| 4495   | N   | N   | . MET MET MET B B 164 164 . | 0.1753 | 0.1801 | 0.1670 | 0.0342  | -0.0230 | - |
| 0.0541 | 1   | .   |                             |        |        |        |         |         |   |
| 4496   | CA  | CA  | . MET MET MET B B 164 164 . | 0.1625 | 0.1393 | 0.1402 | 0.0150  | 0.0024  | - |
| 0.0544 | 1   | .   |                             |        |        |        |         |         |   |
| 4497   | CB  | CB  | . MET MET MET B B 164 164 . | 0.2187 | 0.1789 | 0.1280 | 0.0222  | 0.0220  | - |
| 0.0370 | 1   | .   |                             |        |        |        |         |         |   |
| 4498   | CG  | CG  | . MET MET MET B B 164 164 . | 0.2145 | 0.1586 | 0.1380 | 0.0234  | -0.0094 | - |
| 0.0523 | 1   | .   |                             |        |        |        |         |         |   |
| 4499   | SD  | SD  | . MET MET MET B B 164 164 . | 0.1828 | 0.1491 | 0.1763 | 0.0234  | -0.0415 | - |
| 0.0388 | 1   | .   |                             |        |        |        |         |         |   |
| 4500   | CE  | CE  | . MET MET MET B B 164 164 . | 0.2063 | 0.1388 | 0.2004 | 0.0205  | -0.0187 | - |
| 0.0118 | 1   | .   |                             |        |        |        |         |         |   |
| 4501   | C   | C   | . MET MET MET B B 164 164 . | 0.1662 | 0.1457 | 0.1373 | 0.0272  | -0.0058 | - |
| 0.0437 | 1   | .   |                             |        |        |        |         |         |   |
| 4502   | O   | O   | . MET MET MET B B 164 164 . | 0.1796 | 0.1569 | 0.1702 | 0.0246  | -0.0285 | - |
| 0.0334 | 1   | .   |                             |        |        |        |         |         |   |
| 4503   | N   | N   | . GLN GLN GLN B B 165 165 . | 0.1544 | 0.1058 | 0.1055 | 0.0123  | -0.0053 | - |
| 0.0313 | 1   | .   |                             |        |        |        |         |         |   |
| 4504   | CA  | CA  | . GLN GLN GLN B B 165 165 . | 0.1404 | 0.1330 | 0.1491 | 0.0309  | -0.0024 | - |
| 0.0161 | 1   | .   |                             |        |        |        |         |         |   |
| 4505   | CB  | CB  | . GLN GLN GLN B B 165 165 . | 0.1292 | 0.1378 | 0.1438 | 0.0445  | 0.0199  | - |
| 0.0132 | 1   | .   |                             |        |        |        |         |         |   |
| 4506   | CG  | CG  | . GLN GLN GLN B B 165 165 . | 0.1157 | 0.1631 | 0.1276 | 0.0457  | 0.0061  | - |
| 0.0165 | 1   | .   |                             |        |        |        |         |         |   |
| 4507   | CD  | CD  | . GLN GLN GLN B B 165 165 . | 0.1515 | 0.1632 | 0.1721 | 0.0284  | -0.0080 | - |
| 0.0085 | 1   | .   |                             |        |        |        |         |         |   |
| 4508   | OE1 | OE1 | . GLN GLN GLN B B 165 165 . | 0.1680 | 0.1633 | 0.1340 | 0.0571  | -0.0129 | - |
| 0.0063 | 1   | .   |                             |        |        |        |         |         |   |
| 4509   | NE2 | NE2 | . GLN GLN GLN B B 165 165 . | 0.2144 | 0.1341 | 0.1647 | 0.0189  | 0.0293  | - |
| 0.0590 | 1   | .   |                             |        |        |        |         |         |   |
| 4510   | C   | C   | . GLN GLN GLN B B 165 165 . | 0.1584 | 0.1295 | 0.1329 | 0.0340  | -0.0065 | - |
| 0.0058 | 1   | .   |                             |        |        |        |         |         |   |
| 4511   | O   | O   | . GLN GLN GLN B B 165 165 . | 0.2041 | 0.1746 | 0.1249 | 0.0604  | -0.0296 | - |
| 0.0237 | 1   | .   |                             |        |        |        |         |         |   |
| 4512   | N   | N   | . GLU GLU GLU B B 166 166 . | 0.1591 | 0.1363 | 0.1316 | 0.0317  | -0.0151 | - |
| 0.0095 | 1   | .   |                             |        |        |        |         |         |   |
| 4513   | CA  | CA  | . GLU GLU GLU B B 166 166 . | 0.1555 | 0.1203 | 0.1021 | 0.0261  | -0.0027 | - |
| 0.0056 | 1   | .   |                             |        |        |        |         |         |   |
| 4514   | CB  | CB  | . GLU GLU GLU B B 166 166 . | 0.1453 | 0.1133 | 0.0808 | 0.0353  | 0.0139  | - |
| 0.0004 | 1   | .   |                             |        |        |        |         |         |   |
| 4515   | CG  | CG  | . GLU GLU GLU B B 166 166 . | 0.1908 | 0.1365 | 0.1174 | 0.0195  | 0.0260  | - |
| 0.0164 | 1   | .   |                             |        |        |        |         |         |   |
| 4516   | CD  | CD  | . GLU GLU GLU B B 166 166 . | 0.2064 | 0.1541 | 0.1628 | 0.0110  | -0.0044 | - |
| 0.0020 | 1   | .   |                             |        |        |        |         |         |   |
| 4517   | OE1 | OE1 | . GLU GLU GLU B B 166 166 . | 0.2513 | 0.1589 | 0.1387 | -0.0042 | 0.0086  | - |
| 0.0190 | 1   | .   |                             |        |        |        |         |         |   |
| 4518   | OE2 | OE2 | . GLU GLU GLU B B 166 166 . | 0.2151 | 0.2016 | 0.1822 | 0.0556  | 0.0053  | - |
| 0.0188 | 1   | .   |                             |        |        |        |         |         |   |
| 4519   | C   | C   | . GLU GLU GLU B B 166 166 . | 0.1640 | 0.1370 | 0.1059 | 0.0384  | -0.0094 | - |
| 0.0120 | 1   | .   |                             |        |        |        |         |         |   |
| 4520   | O   | O   | . GLU GLU GLU B B 166 166 . | 0.1509 | 0.1479 | 0.1030 | 0.0483  | -0.0235 | - |
| 0.0039 | 1   | .   |                             |        |        |        |         |         |   |
| 4521   | N   | N   | . PHE PHE PHE B B 167 167 . | 0.1644 | 0.1404 | 0.0953 | 0.0387  | -0.0187 | - |
| 0.0208 | 1   | .   |                             |        |        |        |         |         |   |





|        |     |     |                             |        |        |        |         |         |   |
|--------|-----|-----|-----------------------------|--------|--------|--------|---------|---------|---|
| 4552   | CD1 | CD1 | . LEU LEU LEU B B 170 170 . | 0.1275 | 0.1251 | 0.1768 | -0.0043 | 0.0480  |   |
| 0.0247 | 1   | .   |                             |        |        |        |         |         |   |
| 4553   | CD2 | CD2 | . LEU LEU LEU B B 170 170 . | 0.1722 | 0.1893 | 0.1511 | 0.0429  | -0.0343 | - |
| 0.0134 | 1   | .   |                             |        |        |        |         |         |   |
| 4554   | C   | C   | . LEU LEU LEU B B 170 170 . | 0.1765 | 0.0953 | 0.1180 | 0.0315  | 0.0238  | - |
| 0.0052 | 1   | .   |                             |        |        |        |         |         |   |
| 4555   | O   | O   | . LEU LEU LEU B B 170 170 . | 0.1585 | 0.1171 | 0.1090 | 0.0137  | 0.0255  |   |
| 0.0096 | 1   | .   |                             |        |        |        |         |         |   |
| 4556   | N   | N   | . PRO PRO PRO B B 171 171 . | 0.1554 | 0.1161 | 0.1005 | 0.0204  | 0.0287  | - |
| 0.0022 | 1   | .   |                             |        |        |        |         |         |   |
| 4557   | CA  | CA  | . PRO PRO PRO B B 171 171 . | 0.1929 | 0.1225 | 0.1165 | 0.0213  | 0.0072  |   |
| 0.0129 | 1   | .   |                             |        |        |        |         |         |   |
| 4558   | CB  | CB  | . PRO PRO PRO B B 171 171 . | 0.2342 | 0.1417 | 0.1134 | 0.0105  | 0.0206  |   |
| 0.0163 | 1   | .   |                             |        |        |        |         |         |   |
| 4559   | CG  | CG  | . PRO PRO PRO B B 171 171 . | 0.2207 | 0.1317 | 0.1474 | 0.0219  | 0.0029  | - |
| 0.0064 | 1   | .   |                             |        |        |        |         |         |   |
| 4560   | CD  | CD  | . PRO PRO PRO B B 171 171 . | 0.1821 | 0.1187 | 0.0750 | 0.0364  | 0.0186  |   |
| 0.0090 | 1   | .   |                             |        |        |        |         |         |   |
| 4561   | C   | C   | . PRO PRO PRO B B 171 171 . | 0.1922 | 0.1401 | 0.1351 | 0.0132  | 0.0235  | - |
| 0.0063 | 1   | .   |                             |        |        |        |         |         |   |
| 4562   | O   | O   | . PRO PRO PRO B B 171 171 . | 0.2313 | 0.1436 | 0.1387 | 0.0089  | 0.0311  | - |
| 0.0153 | 1   | .   |                             |        |        |        |         |         |   |
| 4563   | N   | N   | . VAL VAL VAL B B 172 172 . | 0.1804 | 0.1407 | 0.1226 | 0.0295  | 0.0250  |   |
| 0.0015 | 1   | .   |                             |        |        |        |         |         |   |
| 4564   | CA  | CA  | . VAL VAL VAL B B 172 172 . | 0.2198 | 0.1499 | 0.1472 | 0.0105  | 0.0094  |   |
| 0.0064 | 1   | .   |                             |        |        |        |         |         |   |
| 4565   | CB  | CB  | . VAL VAL VAL B B 172 172 . | 0.2456 | 0.1511 | 0.1465 | 0.0181  | 0.0096  |   |
| 0.0101 | 1   | .   |                             |        |        |        |         |         |   |
| 4566   | CG1 | CG1 | . VAL VAL VAL B B 172 172 . | 0.2351 | 0.0894 | 0.1411 | 0.0243  | 0.0115  |   |
| 0.0234 | 1   | .   |                             |        |        |        |         |         |   |
| 4567   | CG2 | CG2 | . VAL VAL VAL B B 172 172 . | 0.2141 | 0.1967 | 0.1544 | 0.0324  | -0.0231 |   |
| 0.0227 | 1   | .   |                             |        |        |        |         |         |   |
| 4568   | C   | C   | . VAL VAL VAL B B 172 172 . | 0.2004 | 0.1508 | 0.1278 | 0.0009  | 0.0212  |   |
| 0.0102 | 1   | .   |                             |        |        |        |         |         |   |
| 4569   | O   | O   | . VAL VAL VAL B B 172 172 . | 0.2412 | 0.1870 | 0.1317 | 0.0137  | 0.0266  | - |
| 0.0066 | 1   | .   |                             |        |        |        |         |         |   |
| 4570   | N   | N   | . GLY GLY GLY B B 173 173 . | 0.2301 | 0.1450 | 0.1674 | 0.0096  | 0.0255  |   |
| 0.0057 | 1   | .   |                             |        |        |        |         |         |   |
| 4571   | CA  | CA  | . GLY GLY GLY B B 173 173 . | 0.2484 | 0.1482 | 0.1430 | 0.0107  | 0.0270  |   |
| 0.0029 | 1   | .   |                             |        |        |        |         |         |   |
| 4572   | C   | C   | . GLY GLY GLY B B 173 173 . | 0.2559 | 0.1415 | 0.1568 | 0.0173  | 0.0497  |   |
| 0.0033 | 1   | .   |                             |        |        |        |         |         |   |
| 4573   | O   | O   | . GLY GLY GLY B B 173 173 . | 0.2979 | 0.1615 | 0.1530 | 0.0233  | 0.0579  |   |
| 0.0029 | 1   | .   |                             |        |        |        |         |         |   |
| 4574   | N   | N   | . ALA ALA ALA B B 174 174 . | 0.2139 | 0.1553 | 0.1341 | 0.0071  | 0.0200  |   |
| 0.0205 | 1   | .   |                             |        |        |        |         |         |   |
| 4575   | CA  | CA  | . ALA ALA ALA B B 174 174 . | 0.2409 | 0.1727 | 0.1524 | 0.0178  | 0.0370  |   |
| 0.0009 | 1   | .   |                             |        |        |        |         |         |   |
| 4576   | CB  | CB  | . ALA ALA ALA B B 174 174 . | 0.2319 | 0.1525 | 0.1139 | 0.0204  | 0.0128  |   |
| 0.0009 | 1   | .   |                             |        |        |        |         |         |   |
| 4577   | C   | C   | . ALA ALA ALA B B 174 174 . | 0.2358 | 0.1732 | 0.1597 | 0.0207  | 0.0245  | - |
| 0.0129 | 1   | .   |                             |        |        |        |         |         |   |
| 4578   | O   | O   | . ALA ALA ALA B B 174 174 . | 0.2485 | 0.1819 | 0.1738 | 0.0053  | 0.0412  | - |
| 0.0201 | 1   | .   |                             |        |        |        |         |         |   |
| 4579   | N   | N   | . GLU GLU GLU B B 175 175 . | 0.2643 | 0.1848 | 0.1779 | 0.0160  | 0.0185  |   |
| 0.0165 | 1   | .   |                             |        |        |        |         |         |   |
| 4580   | CA  | CA  | . GLU GLU GLU B B 175 175 . | 0.2627 | 0.2134 | 0.2171 | 0.0098  | 0.0035  |   |
| 0.0035 | 1   | .   |                             |        |        |        |         |         |   |
| 4581   | CB  | CB  | . GLU GLU GLU B B 175 175 . | 0.2860 | 0.2193 | 0.2720 | 0.0118  | 0.0119  |   |
| 0.0114 | 1   | .   |                             |        |        |        |         |         |   |

|        |     |     |                             |        |        |        |         |         |   |
|--------|-----|-----|-----------------------------|--------|--------|--------|---------|---------|---|
| 4582   | CG  | CG  | . GLU GLU GLU B B 175 175 . | 0.3482 | 0.3514 | 0.3494 | 0.0076  | 0.0511  |   |
| 0.0245 | 1   | .   |                             |        |        |        |         |         |   |
| 4583   | CD  | CD  | . GLU GLU GLU B B 175 175 . | 0.5348 | 0.4353 | 0.4917 | 0.0057  | 0.0817  |   |
| 0.0055 | 1   | .   |                             |        |        |        |         |         |   |
| 4584   | OE1 | OE1 | . GLU GLU GLU B B 175 175 . | 0.6244 | 0.4974 | 0.4788 | -0.0231 | 0.0728  |   |
| 0.0293 | 1   | .   |                             |        |        |        |         |         |   |
| 4585   | OE2 | OE2 | . GLU GLU GLU B B 175 175 . | 0.5634 | 0.5748 | 0.5027 | -0.0230 | 0.1075  |   |
| 0.0186 | 1   | .   |                             |        |        |        |         |         |   |
| 4586   | C   | C   | . GLU GLU GLU B B 175 175 . | 0.2458 | 0.1964 | 0.1758 | 0.0033  | -0.0061 | - |
| 0.0052 | 1   | .   |                             |        |        |        |         |         |   |
| 4587   | O   | O   | . GLU GLU GLU B B 175 175 . | 0.2902 | 0.2198 | 0.1507 | -0.0167 | 0.0022  | - |
| 0.0192 | 1   | .   |                             |        |        |        |         |         |   |
| 4588   | N   | N   | . SER SER SER B B 176 176 . | 0.2263 | 0.1515 | 0.1560 | 0.0052  | -0.0039 | - |
| 0.0098 | 1   | .   |                             |        |        |        |         |         |   |
| 4589   | CA  | CA  | . SER SER SER B B 176 176 . | 0.2011 | 0.1163 | 0.1357 | 0.0030  | -0.0193 | - |
| 0.0216 | 1   | .   |                             |        |        |        |         |         |   |
| 4590   | CB  | CB  | . SER SER SER B B 176 176 . | 0.1900 | 0.1420 | 0.1661 | -0.0042 | -0.0296 | - |
| 0.0203 | 1   | .   |                             |        |        |        |         |         |   |
| 4591   | OG  | OG  | . SER SER SER B B 176 176 . | 0.1892 | 0.1385 | 0.1691 | 0.0196  | -0.0124 | - |
| 0.0416 | 1   | .   |                             |        |        |        |         |         |   |
| 4592   | C   | C   | . SER SER SER B B 176 176 . | 0.1769 | 0.1069 | 0.1326 | 0.0004  | -0.0128 | - |
| 0.0187 | 1   | .   |                             |        |        |        |         |         |   |
| 4593   | O   | O   | . SER SER SER B B 176 176 . | 0.2125 | 0.1089 | 0.1011 | 0.0145  | -0.0135 |   |
| 0.0046 | 1   | .   |                             |        |        |        |         |         |   |
| 4594   | N   | N   | . PHE PHE PHE B B 177 177 . | 0.2042 | 0.1196 | 0.0978 | 0.0162  | -0.0065 | - |
| 0.0305 | 1   | .   |                             |        |        |        |         |         |   |
| 4595   | CA  | CA  | . PHE PHE PHE B B 177 177 . | 0.1598 | 0.1068 | 0.1330 | -0.0014 | -0.0012 | - |
| 0.0223 | 1   | .   |                             |        |        |        |         |         |   |
| 4596   | CB  | CB  | . PHE PHE PHE B B 177 177 . | 0.1610 | 0.0898 | 0.1074 | 0.0187  | 0.0079  | - |
| 0.0167 | 1   | .   |                             |        |        |        |         |         |   |
| 4597   | CG  | CG  | . PHE PHE PHE B B 177 177 . | 0.1502 | 0.1037 | 0.0950 | -0.0040 | -0.0086 | - |
| 0.0266 | 1   | .   |                             |        |        |        |         |         |   |
| 4598   | CD1 | CD1 | . PHE PHE PHE B B 177 177 . | 0.1547 | 0.0819 | 0.0841 | -0.0028 | -0.0132 | - |
| 0.0156 | 1   | .   |                             |        |        |        |         |         |   |
| 4599   | CE1 | CE1 | . PHE PHE PHE B B 177 177 . | 0.1676 | 0.1101 | 0.1194 | 0.0181  | -0.0319 | - |
| 0.0292 | 1   | .   |                             |        |        |        |         |         |   |
| 4600   | CZ  | CZ  | . PHE PHE PHE B B 177 177 . | 0.1802 | 0.1301 | 0.1115 | 0.0241  | -0.0137 | - |
| 0.0309 | 1   | .   |                             |        |        |        |         |         |   |
| 4601   | CE2 | CE2 | . PHE PHE PHE B B 177 177 . | 0.1417 | 0.1358 | 0.1359 | 0.0029  | 0.0259  | - |
| 0.0188 | 1   | .   |                             |        |        |        |         |         |   |
| 4602   | CD2 | CD2 | . PHE PHE PHE B B 177 177 . | 0.1540 | 0.1692 | 0.1396 | 0.0216  | -0.0299 | - |
| 0.0340 | 1   | .   |                             |        |        |        |         |         |   |
| 4603   | C   | C   | . PHE PHE PHE B B 177 177 . | 0.1669 | 0.0982 | 0.1200 | 0.0010  | -0.0004 | - |
| 0.0011 | 1   | .   |                             |        |        |        |         |         |   |
| 4604   | O   | O   | . PHE PHE PHE B B 177 177 . | 0.1410 | 0.1005 | 0.1166 | 0.0197  | 0.0176  |   |
| 0.0084 | 1   | .   |                             |        |        |        |         |         |   |
| 4605   | N   | N   | . ARG ARG ARG B B 178 178 . | 0.1726 | 0.1162 | 0.1375 | -0.0063 | 0.0047  |   |
| 0.0069 | 1   | .   |                             |        |        |        |         |         |   |
| 4606   | CA  | CA  | . ARG ARG ARG B B 178 178 . | 0.1643 | 0.1071 | 0.1246 | 0.0023  | -0.0006 |   |
| 0.0161 | 1   | .   |                             |        |        |        |         |         |   |
| 4607   | CB  | CB  | . ARG ARG ARG B B 178 178 . | 0.1994 | 0.1263 | 0.1385 | -0.0053 | -0.0123 |   |
| 0.0212 | 1   | .   |                             |        |        |        |         |         |   |
| 4608   | CG  | CG  | . ARG ARG ARG B B 178 178 . | 0.1792 | 0.2189 | 0.2221 | 0.0181  | -0.0364 | - |
| 0.0012 | 1   | .   |                             |        |        |        |         |         |   |
| 4609   | C   | C   | . ARG ARG ARG B B 178 178 . | 0.1661 | 0.1096 | 0.1240 | -0.0096 | -0.0015 |   |
| 0.0193 | 1   | .   |                             |        |        |        |         |         |   |
| 4610   | O   | O   | . ARG ARG ARG B B 178 178 . | 0.1674 | 0.1098 | 0.1119 | -0.0044 | 0.0124  | - |
| 0.0041 | 1   | .   |                             |        |        |        |         |         |   |
| 4611   | N   | N   | . ASP ASP ASP B B 179 179 . | 0.1443 | 0.0911 | 0.1167 | -0.0021 | 0.0072  | - |
| 0.0047 | 1   | .   |                             |        |        |        |         |         |   |



|        |     |     |                             |        |        |        |         |         |   |
|--------|-----|-----|-----------------------------|--------|--------|--------|---------|---------|---|
| 4642   | O   | O   | . ARG ARG ARG B B 182 182 . | 0.1420 | 0.1196 | 0.1187 | 0.0171  | 0.0023  | - |
| 0.0076 | 1   | .   |                             |        |        |        |         |         |   |
| 4643   | N   | N   | . LEU LEU LEU B B 183 183 . | 0.1716 | 0.1527 | 0.1403 | 0.0251  | 0.0143  |   |
| 0.0029 | 1   | .   |                             |        |        |        |         |         |   |
| 4644   | CA  | CA  | . LEU LEU LEU B B 183 183 . | 0.1868 | 0.1475 | 0.1447 | 0.0161  | 0.0175  | - |
| 0.0045 | 1   | .   |                             |        |        |        |         |         |   |
| 4645   | CB  | CB  | . LEU LEU LEU B B 183 183 . | 0.1779 | 0.1503 | 0.1268 | 0.0170  | 0.0079  | - |
| 0.0114 | 1   | .   |                             |        |        |        |         |         |   |
| 4646   | CG  | CG  | . LEU LEU LEU B B 183 183 . | 0.3309 | 0.2099 | 0.1590 | 0.0256  | 0.0187  | - |
| 0.0189 | 1   | .   |                             |        |        |        |         |         |   |
| 4647   | CD1 | CD1 | . LEU LEU LEU B B 183 183 . | 0.2615 | 0.2040 | 0.1607 | 0.0077  | 0.0827  | - |
| 0.0500 | 1   | .   |                             |        |        |        |         |         |   |
| 4648   | CD2 | CD2 | . LEU LEU LEU B B 183 183 . | 0.2430 | 0.2014 | 0.1627 | 0.0779  | 0.0779  | - |
| 0.0492 | 1   | .   |                             |        |        |        |         |         |   |
| 4649   | C   | C   | . LEU LEU LEU B B 183 183 . | 0.1574 | 0.1491 | 0.1475 | 0.0188  | 0.0102  | - |
| 0.0096 | 1   | .   |                             |        |        |        |         |         |   |
| 4650   | O   | O   | . LEU LEU LEU B B 183 183 . | 0.1340 | 0.0941 | 0.1232 | 0.0250  | 0.0206  | - |
| 0.0107 | 1   | .   |                             |        |        |        |         |         |   |
| 4651   | N   | N   | . GLY GLY GLY B B 184 184 . | 0.1674 | 0.1398 | 0.1322 | 0.0334  | 0.0293  | - |
| 0.0232 | 1   | .   |                             |        |        |        |         |         |   |
| 4652   | CA  | CA  | . GLY GLY GLY B B 184 184 . | 0.1492 | 0.1300 | 0.1202 | 0.0024  | 0.0149  |   |
| 0.0034 | 1   | .   |                             |        |        |        |         |         |   |
| 4653   | C   | C   | . GLY GLY GLY B B 184 184 . | 0.1241 | 0.1027 | 0.1166 | 0.0197  | 0.0164  | - |
| 0.0175 | 1   | .   |                             |        |        |        |         |         |   |
| 4654   | O   | O   | . GLY GLY GLY B B 184 184 . | 0.1271 | 0.1164 | 0.1031 | 0.0311  | 0.0084  | - |
| 0.0098 | 1   | .   |                             |        |        |        |         |         |   |
| 4655   | N   | N   | . ALA ALA ALA B B 185 185 . | 0.1223 | 0.1071 | 0.0965 | 0.0244  | 0.0321  | - |
| 0.0022 | 1   | .   |                             |        |        |        |         |         |   |
| 4656   | CA  | CA  | . ALA ALA ALA B B 185 185 . | 0.1027 | 0.0914 | 0.0881 | 0.0225  | 0.0256  |   |
| 0.0060 | 1   | .   |                             |        |        |        |         |         |   |
| 4657   | CB  | CB  | . ALA ALA ALA B B 185 185 . | 0.0960 | 0.0948 | 0.1186 | -0.0069 | 0.0272  | - |
| 0.0020 | 1   | .   |                             |        |        |        |         |         |   |
| 4658   | C   | C   | . ALA ALA ALA B B 185 185 . | 0.1189 | 0.1072 | 0.0945 | 0.0142  | 0.0190  |   |
| 0.0057 | 1   | .   |                             |        |        |        |         |         |   |
| 4659   | O   | O   | . ALA ALA ALA B B 185 185 . | 0.1469 | 0.1048 | 0.1148 | 0.0353  | 0.0320  | - |
| 0.0007 | 1   | .   |                             |        |        |        |         |         |   |
| 4660   | N   | N   | . GLU GLU GLU B B 186 186 . | 0.1566 | 0.1056 | 0.1083 | 0.0244  | 0.0244  |   |
| 0.0043 | 1   | .   |                             |        |        |        |         |         |   |
| 4661   | CA  | CA  | . GLU GLU GLU B B 186 186 . | 0.1356 | 0.1076 | 0.1167 | 0.0099  | 0.0167  | - |
| 0.0163 | 1   | .   |                             |        |        |        |         |         |   |
| 4662   | CB  | CB  | . GLU GLU GLU B B 186 186 . | 0.1793 | 0.1022 | 0.1532 | 0.0209  | 0.0301  | - |
| 0.0064 | 1   | .   |                             |        |        |        |         |         |   |
| 4663   | CG  | CG  | . GLU GLU GLU B B 186 186 . | 0.2008 | 0.1150 | 0.1170 | 0.0042  | 0.0628  |   |
| 0.0124 | 1   | .   |                             |        |        |        |         |         |   |
| 4664   | CD  | CD  | . GLU GLU GLU B B 186 186 . | 0.2493 | 0.1462 | 0.2036 | 0.0097  | 0.0916  | - |
| 0.0166 | 1   | .   |                             |        |        |        |         |         |   |
| 4665   | OE1 | OE1 | . GLU GLU GLU B B 186 186 . | 0.2829 | 0.1446 | 0.1607 | 0.0666  | 0.0609  |   |
| 0.0136 | 1   | .   |                             |        |        |        |         |         |   |
| 4666   | OE2 | OE2 | . GLU GLU GLU B B 186 186 . | 0.2676 | 0.1208 | 0.1892 | 0.0129  | 0.0524  |   |
| 0.0272 | 1   | .   |                             |        |        |        |         |         |   |
| 4667   | C   | C   | . GLU GLU GLU B B 186 186 . | 0.1321 | 0.1251 | 0.1219 | 0.0205  | 0.0133  | - |
| 0.0001 | 1   | .   |                             |        |        |        |         |         |   |
| 4668   | O   | O   | . GLU GLU GLU B B 186 186 . | 0.1384 | 0.1117 | 0.1156 | 0.0167  | 0.0045  | - |
| 0.0033 | 1   | .   |                             |        |        |        |         |         |   |
| 4669   | N   | N   | . VAL VAL VAL B B 187 187 . | 0.1256 | 0.1129 | 0.1293 | 0.0252  | 0.0218  | - |
| 0.0059 | 1   | .   |                             |        |        |        |         |         |   |
| 4670   | CA  | CA  | . VAL VAL VAL B B 187 187 . | 0.1406 | 0.1192 | 0.1310 | 0.0281  | 0.0187  | - |
| 0.0024 | 1   | .   |                             |        |        |        |         |         |   |
| 4671   | CB  | CB  | . VAL VAL VAL B B 187 187 . | 0.1164 | 0.1003 | 0.1011 | 0.0080  | -0.0004 | - |
| 0.0020 | 1   | .   |                             |        |        |        |         |         |   |





|        |     |     |                             |        |        |        |        |         |   |
|--------|-----|-----|-----------------------------|--------|--------|--------|--------|---------|---|
| 4732   | O   | O   | . VAL VAL VAL B B 194 194 . | 0.1903 | 0.2230 | 0.2534 | 0.0165 | 0.0559  |   |
| 0.0130 | 1   | .   |                             |        |        |        |        |         |   |
| 4733   | N   | N   | . ILE ILE ILE B B 195 195 . | 0.1529 | 0.1807 | 0.1918 | 0.0338 | 0.0481  |   |
| 0.0037 | 1   | .   |                             |        |        |        |        |         |   |
| 4734   | CA  | CA  | . ILE ILE ILE B B 195 195 . | 0.1623 | 0.1833 | 0.1885 | 0.0264 | 0.0284  |   |
| 0.0016 | 1   | .   |                             |        |        |        |        |         |   |
| 4735   | CB  | CB  | . ILE ILE ILE B B 195 195 . | 0.1735 | 0.1507 | 0.1618 | 0.0413 | 0.0230  | - |
| 0.0169 | 1   | .   |                             |        |        |        |        |         |   |
| 4736   | CG1 | CG1 | . ILE ILE ILE B B 195 195 . | 0.1283 | 0.1656 | 0.2122 | 0.0458 | 0.0270  |   |
| 0.0035 | 1   | .   |                             |        |        |        |        |         |   |
| 4737   | CD1 | CD1 | . ILE ILE ILE B B 195 195 . | 0.1508 | 0.1934 | 0.2408 | 0.0699 | 0.0614  | - |
| 0.0499 | 1   | .   |                             |        |        |        |        |         |   |
| 4738   | CG2 | CG2 | . ILE ILE ILE B B 195 195 . | 0.1830 | 0.1636 | 0.1575 | 0.0026 | -0.0235 | - |
| 0.0353 | 1   | .   |                             |        |        |        |        |         |   |
| 4739   | C   | C   | . ILE ILE ILE B B 195 195 . | 0.1819 | 0.1870 | 0.2259 | 0.0235 | 0.0233  |   |
| 0.0011 | 1   | .   |                             |        |        |        |        |         |   |
| 4740   | O   | O   | . ILE ILE ILE B B 195 195 . | 0.1815 | 0.2001 | 0.2372 | 0.0193 | 0.0406  |   |
| 0.0265 | 1   | .   |                             |        |        |        |        |         |   |
| 4741   | N   | N   | . LYS LYS LYS B B 196 196 . | 0.1775 | 0.2104 | 0.2103 | 0.0169 | 0.0399  |   |
| 0.0249 | 1   | .   |                             |        |        |        |        |         |   |
| 4742   | CA  | CA  | . LYS LYS LYS B B 196 196 . | 0.1925 | 0.2214 | 0.2249 | 0.0319 | 0.0320  |   |
| 0.0221 | 1   | .   |                             |        |        |        |        |         |   |
| 4743   | CB  | CB  | . LYS LYS LYS B B 196 196 . | 0.1997 | 0.2339 | 0.2111 | 0.0285 | 0.0392  |   |
| 0.0181 | 1   | .   |                             |        |        |        |        |         |   |
| 4744   | CG  | CG  | . LYS LYS LYS B B 196 196 . | 0.2519 | 0.2465 | 0.2311 | 0.0005 | -0.0044 |   |
| 0.0470 | 1   | .   |                             |        |        |        |        |         |   |
| 4745   | CD  | CD  | . LYS LYS LYS B B 196 196 . | 0.3573 | 0.2456 | 0.2253 | 0.0000 | -0.0106 |   |
| 0.0673 | 1   | .   |                             |        |        |        |        |         |   |
| 4746   | C   | C   | . LYS LYS LYS B B 196 196 . | 0.2041 | 0.2397 | 0.2365 | 0.0195 | 0.0283  |   |
| 0.0236 | 1   | .   |                             |        |        |        |        |         |   |
| 4747   | O   | O   | . LYS LYS LYS B B 196 196 . | 0.1878 | 0.2565 | 0.2505 | 0.0478 | 0.0339  |   |
| 0.0179 | 1   | .   |                             |        |        |        |        |         |   |
| 4748   | N   | N   | . ASP ASP ASP B B 197 197 . | 0.2079 | 0.2522 | 0.2300 | 0.0437 | 0.0293  |   |
| 0.0297 | 1   | .   |                             |        |        |        |        |         |   |
| 4749   | CA  | CA  | . ASP ASP ASP B B 197 197 . | 0.2229 | 0.2841 | 0.2781 | 0.0185 | 0.0160  |   |
| 0.0197 | 1   | .   |                             |        |        |        |        |         |   |
| 4750   | CB  | CB  | . ASP ASP ASP B B 197 197 . | 0.2384 | 0.2873 | 0.2963 | 0.0216 | 0.0222  |   |
| 0.0129 | 1   | .   |                             |        |        |        |        |         |   |
| 4751   | CG  | CG  | . ASP ASP ASP B B 197 197 . | 0.3190 | 0.3242 | 0.3369 | 0.0336 | -0.0073 |   |
| 0.0050 | 1   | .   |                             |        |        |        |        |         |   |
| 4752   | OD1 | OD1 | . ASP ASP ASP B B 197 197 . | 0.3784 | 0.3118 | 0.3876 | 0.0410 | 0.0467  | - |
| 0.0368 | 1   | .   |                             |        |        |        |        |         |   |
| 4753   | OD2 | OD2 | . ASP ASP ASP B B 197 197 . | 0.3892 | 0.4067 | 0.3694 | 0.0313 | 0.0045  |   |
| 0.0247 | 1   | .   |                             |        |        |        |        |         |   |
| 4754   | C   | C   | . ASP ASP ASP B B 197 197 . | 0.2244 | 0.2802 | 0.2806 | 0.0145 | 0.0089  |   |
| 0.0332 | 1   | .   |                             |        |        |        |        |         |   |
| 4755   | O   | O   | . ASP ASP ASP B B 197 197 . | 0.1992 | 0.3012 | 0.3099 | 0.0034 | 0.0049  |   |
| 0.0358 | 1   | .   |                             |        |        |        |        |         |   |
| 4756   | N   | N   | . LYS LYS LYS B B 198 198 . | 0.1962 | 0.2596 | 0.2497 | 0.0193 | 0.0144  |   |
| 0.0166 | 1   | .   |                             |        |        |        |        |         |   |
| 4757   | CA  | CA  | . LYS LYS LYS B B 198 198 . | 0.2096 | 0.2251 | 0.2326 | 0.0173 | 0.0264  | - |
| 0.0032 | 1   | .   |                             |        |        |        |        |         |   |
| 4758   | CB  | CB  | . LYS LYS LYS B B 198 198 . | 0.2327 | 0.2278 | 0.2347 | 0.0111 | 0.0255  |   |
| 0.0115 | 1   | .   |                             |        |        |        |        |         |   |
| 4759   | CG  | CG  | . LYS LYS LYS B B 198 198 . | 0.2855 | 0.2368 | 0.2269 | 0.0112 | 0.0254  |   |
| 0.0050 | 1   | .   |                             |        |        |        |        |         |   |
| 4760   | CD  | CD  | . LYS LYS LYS B B 198 198 . | 0.2961 | 0.2887 | 0.2977 | 0.0422 | 0.0000  |   |
| 0.0519 | 1   | .   |                             |        |        |        |        |         |   |
| 4761   | CE  | CE  | . LYS LYS LYS B B 198 198 . | 0.3425 | 0.3604 | 0.3783 | 0.0041 | -0.0075 |   |
| 0.0680 | 1   | .   |                             |        |        |        |        |         |   |









|        |     |     |                             |        |        |        |         |         |   |
|--------|-----|-----|-----------------------------|--------|--------|--------|---------|---------|---|
| 4852   | C   | C   | . GLY GLY GLY B B 211 211 . | 0.1602 | 0.1860 | 0.1400 | 0.0370  | -0.0025 | - |
| 0.0031 | 1   | .   |                             |        |        |        |         |         |   |
| 4853   | O   | O   | . GLY GLY GLY B B 211 211 . | 0.1687 | 0.1565 | 0.1454 | 0.0354  | 0.0409  |   |
| 0.0143 | 1   | .   |                             |        |        |        |         |         |   |
| 4854   | N   | N   | . PHE PHE PHE B B 212 212 . | 0.1725 | 0.2338 | 0.1618 | 0.0437  | 0.0142  | - |
| 0.0170 | 1   | .   |                             |        |        |        |         |         |   |
| 4855   | CA  | CA  | . PHE PHE PHE B B 212 212 . | 0.1837 | 0.2479 | 0.1900 | 0.0587  | 0.0237  | - |
| 0.0377 | 1   | .   |                             |        |        |        |         |         |   |
| 4856   | CB  | CB  | . PHE PHE PHE B B 212 212 . | 0.1611 | 0.2153 | 0.1673 | 0.0855  | 0.0338  | - |
| 0.0366 | 1   | .   |                             |        |        |        |         |         |   |
| 4857   | CG  | CG  | . PHE PHE PHE B B 212 212 . | 0.1338 | 0.2563 | 0.1874 | 0.0355  | 0.0576  |   |
| 0.0088 | 1   | .   |                             |        |        |        |         |         |   |
| 4858   | CD1 | CD1 | . PHE PHE PHE B B 212 212 . | 0.1695 | 0.2100 | 0.2024 | 0.0411  | 0.0391  |   |
| 0.0315 | 1   | .   |                             |        |        |        |         |         |   |
| 4859   | CE1 | CE1 | . PHE PHE PHE B B 212 212 . | 0.1199 | 0.2539 | 0.2494 | 0.0472  | 0.0011  |   |
| 0.0392 | 1   | .   |                             |        |        |        |         |         |   |
| 4860   | CZ  | CZ  | . PHE PHE PHE B B 212 212 . | 0.1812 | 0.2740 | 0.2193 | 0.0909  | -0.0205 |   |
| 0.0083 | 1   | .   |                             |        |        |        |         |         |   |
| 4861   | CE2 | CE2 | . PHE PHE PHE B B 212 212 . | 0.1469 | 0.2219 | 0.2294 | 0.0502  | 0.0293  |   |
| 0.0055 | 1   | .   |                             |        |        |        |         |         |   |
| 4862   | CD2 | CD2 | . PHE PHE PHE B B 212 212 . | 0.1174 | 0.2222 | 0.2043 | 0.0978  | 0.0007  |   |
| 0.0182 | 1   | .   |                             |        |        |        |         |         |   |
| 4863   | C   | C   | . PHE PHE PHE B B 212 212 . | 0.2088 | 0.2477 | 0.2072 | 0.0558  | 0.0246  | - |
| 0.0520 | 1   | .   |                             |        |        |        |         |         |   |
| 4864   | O   | O   | . PHE PHE PHE B B 212 212 . | 0.2431 | 0.2380 | 0.2282 | 0.0838  | -0.0218 | - |
| 0.0759 | 1   | .   |                             |        |        |        |         |         |   |
| 4865   | N   | N   | . ALA ALA ALA B B 213 213 . | 0.1954 | 0.2949 | 0.2354 | 0.0627  | 0.0080  | - |
| 0.0632 | 1   | .   |                             |        |        |        |         |         |   |
| 4866   | CA  | CA  | . ALA ALA ALA B B 213 213 . | 0.2317 | 0.3001 | 0.2671 | 0.0448  | 0.0007  | - |
| 0.0638 | 1   | .   |                             |        |        |        |         |         |   |
| 4867   | CB  | CB  | . ALA ALA ALA B B 213 213 . | 0.2342 | 0.3297 | 0.2540 | 0.0541  | 0.0012  | - |
| 0.0804 | 1   | .   |                             |        |        |        |         |         |   |
| 4868   | C   | C   | . ALA ALA ALA B B 213 213 . | 0.2610 | 0.3252 | 0.2749 | 0.0348  | -0.0044 | - |
| 0.0643 | 1   | .   |                             |        |        |        |         |         |   |
| 4869   | O   | O   | . ALA ALA ALA B B 213 213 . | 0.2426 | 0.3559 | 0.2687 | 0.0258  | -0.0115 | - |
| 0.0796 | 1   | .   |                             |        |        |        |         |         |   |
| 4870   | N   | N   | . PRO PRO PRO B B 214 214 . | 0.2717 | 0.3083 | 0.2587 | 0.0340  | -0.0138 | - |
| 0.0585 | 1   | .   |                             |        |        |        |         |         |   |
| 4871   | CA  | CA  | . PRO PRO PRO B B 214 214 . | 0.2954 | 0.3028 | 0.2677 | 0.0311  | -0.0144 | - |
| 0.0493 | 1   | .   |                             |        |        |        |         |         |   |
| 4872   | CB  | CB  | . PRO PRO PRO B B 214 214 . | 0.2928 | 0.3111 | 0.2578 | 0.0486  | -0.0009 | - |
| 0.0453 | 1   | .   |                             |        |        |        |         |         |   |
| 4873   | CG  | CG  | . PRO PRO PRO B B 214 214 . | 0.2839 | 0.2739 | 0.2176 | 0.0030  | -0.0182 | - |
| 0.0568 | 1   | .   |                             |        |        |        |         |         |   |
| 4874   | CD  | CD  | . PRO PRO PRO B B 214 214 . | 0.2826 | 0.2594 | 0.2682 | 0.0486  | -0.0187 | - |
| 0.0723 | 1   | .   |                             |        |        |        |         |         |   |
| 4875   | C   | C   | . PRO PRO PRO B B 214 214 . | 0.2900 | 0.3197 | 0.2701 | 0.0200  | -0.0204 | - |
| 0.0352 | 1   | .   |                             |        |        |        |         |         |   |
| 4876   | O   | O   | . PRO PRO PRO B B 214 214 . | 0.2580 | 0.3025 | 0.2876 | 0.0218  | -0.0801 | - |
| 0.0643 | 1   | .   |                             |        |        |        |         |         |   |
| 4877   | N   | N   | . ASN ASN ASN B B 215 215 . | 0.2796 | 0.3481 | 0.2926 | 0.0249  | -0.0226 | - |
| 0.0279 | 1   | .   |                             |        |        |        |         |         |   |
| 4878   | CA  | CA  | . ASN ASN ASN B B 215 215 . | 0.2935 | 0.3502 | 0.3329 | 0.0305  | -0.0376 | - |
| 0.0201 | 1   | .   |                             |        |        |        |         |         |   |
| 4879   | CB  | CB  | . ASN ASN ASN B B 215 215 . | 0.2967 | 0.3709 | 0.3332 | 0.0174  | -0.0454 | - |
| 0.0282 | 1   | .   |                             |        |        |        |         |         |   |
| 4880   | CG  | CG  | . ASN ASN ASN B B 215 215 . | 0.3049 | 0.3681 | 0.3889 | -0.0015 | -0.0549 |   |
| 0.0058 | 1   | .   |                             |        |        |        |         |         |   |
| 4881   | OD1 | OD1 | . ASN ASN ASN B B 215 215 . | 0.3465 | 0.4950 | 0.5003 | -0.0829 | -0.0861 | - |
| 0.0049 | 1   | .   |                             |        |        |        |         |         |   |





|        |     |     |                             |        |        |        |         |         |   |
|--------|-----|-----|-----------------------------|--------|--------|--------|---------|---------|---|
| 4942   | CD1 | CD1 | . LEU LEU LEU B B 223 223 . | 0.2302 | 0.1760 | 0.1861 | 0.0340  | 0.0085  |   |
| 0.0516 | 1   | .   |                             |        |        |        |         |         |   |
| 4943   | CD2 | CD2 | . LEU LEU LEU B B 223 223 . | 0.1895 | 0.1862 | 0.1727 | -0.0105 | -0.0484 |   |
| 0.0162 | 1   | .   |                             |        |        |        |         |         |   |
| 4944   | C   | C   | . LEU LEU LEU B B 223 223 . | 0.1678 | 0.1405 | 0.1332 | 0.0212  | -0.0077 |   |
| 0.0189 | 1   | .   |                             |        |        |        |         |         |   |
| 4945   | O   | O   | . LEU LEU LEU B B 223 223 . | 0.2008 | 0.1513 | 0.1491 | 0.0108  | -0.0079 |   |
| 0.0122 | 1   | .   |                             |        |        |        |         |         |   |
| 4946   | N   | N   | . GLU GLU GLU B B 224 224 . | 0.1940 | 0.1618 | 0.1434 | 0.0287  | -0.0047 |   |
| 0.0026 | 1   | .   |                             |        |        |        |         |         |   |
| 4947   | CA  | CA  | . GLU GLU GLU B B 224 224 . | 0.1918 | 0.1885 | 0.1684 | 0.0252  | 0.0053  |   |
| 0.0109 | 1   | .   |                             |        |        |        |         |         |   |
| 4948   | CB  | CB  | . GLU GLU GLU B B 224 224 . | 0.2061 | 0.1981 | 0.1757 | 0.0087  | 0.0178  |   |
| 0.0008 | 1   | .   |                             |        |        |        |         |         |   |
| 4949   | CG  | CG  | . GLU GLU GLU B B 224 224 . | 0.3100 | 0.2957 | 0.3218 | 0.0257  | 0.0319  |   |
| 0.0108 | 1   | .   |                             |        |        |        |         |         |   |
| 4950   | CD  | CD  | . GLU GLU GLU B B 224 224 . | 0.4048 | 0.4007 | 0.3439 | -0.0330 | 0.0862  | - |
| 0.0227 | 1   | .   |                             |        |        |        |         |         |   |
| 4951   | OE1 | OE1 | . GLU GLU GLU B B 224 224 . | 0.5268 | 0.3908 | 0.4917 | -0.0200 | 0.1656  | - |
| 0.0034 | 1   | .   |                             |        |        |        |         |         |   |
| 4952   | OE2 | OE2 | . GLU GLU GLU B B 224 224 . | 0.4929 | 0.4102 | 0.4783 | -0.0347 | 0.0513  | - |
| 0.0068 | 1   | .   |                             |        |        |        |         |         |   |
| 4953   | C   | C   | . GLU GLU GLU B B 224 224 . | 0.1977 | 0.1812 | 0.1768 | 0.0203  | 0.0065  |   |
| 0.0006 | 1   | .   |                             |        |        |        |         |         |   |
| 4954   | O   | O   | . GLU GLU GLU B B 224 224 . | 0.2255 | 0.1747 | 0.1985 | 0.0447  | 0.0328  |   |
| 0.0115 | 1   | .   |                             |        |        |        |         |         |   |
| 4955   | N   | N   | . LEU LEU LEU B B 225 225 . | 0.1579 | 0.1833 | 0.1377 | 0.0467  | 0.0054  |   |
| 0.0030 | 1   | .   |                             |        |        |        |         |         |   |
| 4956   | CA  | CA  | . LEU LEU LEU B B 225 225 . | 0.1611 | 0.1668 | 0.1213 | 0.0493  | 0.0100  |   |
| 0.0014 | 1   | .   |                             |        |        |        |         |         |   |
| 4957   | CB  | CB  | . LEU LEU LEU B B 225 225 . | 0.1732 | 0.1723 | 0.1611 | 0.0558  | 0.0010  | - |
| 0.0118 | 1   | .   |                             |        |        |        |         |         |   |
| 4958   | CG  | CG  | . LEU LEU LEU B B 225 225 . | 0.2091 | 0.1822 | 0.1988 | 0.0552  | 0.0011  |   |
| 0.0029 | 1   | .   |                             |        |        |        |         |         |   |
| 4959   | CD1 | CD1 | . LEU LEU LEU B B 225 225 . | 0.2452 | 0.1822 | 0.1930 | 0.0650  | 0.0225  | - |
| 0.0465 | 1   | .   |                             |        |        |        |         |         |   |
| 4960   | CD2 | CD2 | . LEU LEU LEU B B 225 225 . | 0.1934 | 0.2856 | 0.3209 | 0.1042  | -0.0427 |   |
| 0.0204 | 1   | .   |                             |        |        |        |         |         |   |
| 4961   | C   | C   | . LEU LEU LEU B B 225 225 . | 0.1593 | 0.1623 | 0.1213 | 0.0537  | 0.0143  | - |
| 0.0042 | 1   | .   |                             |        |        |        |         |         |   |
| 4962   | O   | O   | . LEU LEU LEU B B 225 225 . | 0.1638 | 0.1807 | 0.1509 | 0.0522  | 0.0117  | - |
| 0.0057 | 1   | .   |                             |        |        |        |         |         |   |
| 4963   | N   | N   | . VAL VAL VAL B B 226 226 . | 0.1423 | 0.1764 | 0.1061 | 0.0557  | 0.0088  | - |
| 0.0100 | 1   | .   |                             |        |        |        |         |         |   |
| 4964   | CA  | CA  | . VAL VAL VAL B B 226 226 . | 0.1628 | 0.1492 | 0.1098 | 0.0355  | 0.0201  | - |
| 0.0029 | 1   | .   |                             |        |        |        |         |         |   |
| 4965   | CB  | CB  | . VAL VAL VAL B B 226 226 . | 0.1389 | 0.1379 | 0.1226 | 0.0434  | 0.0026  | - |
| 0.0103 | 1   | .   |                             |        |        |        |         |         |   |
| 4966   | CG1 | CG1 | . VAL VAL VAL B B 226 226 . | 0.1377 | 0.1698 | 0.1310 | 0.0176  | 0.0066  | - |
| 0.0172 | 1   | .   |                             |        |        |        |         |         |   |
| 4967   | CG2 | CG2 | . VAL VAL VAL B B 226 226 . | 0.1529 | 0.1209 | 0.1006 | 0.0233  | 0.0363  | - |
| 0.0184 | 1   | .   |                             |        |        |        |         |         |   |
| 4968   | C   | C   | . VAL VAL VAL B B 226 226 . | 0.1908 | 0.1568 | 0.1311 | 0.0269  | 0.0187  |   |
| 0.0043 | 1   | .   |                             |        |        |        |         |         |   |
| 4969   | O   | O   | . VAL VAL VAL B B 226 226 . | 0.2254 | 0.1710 | 0.1132 | 0.0228  | 0.0162  |   |
| 0.0323 | 1   | .   |                             |        |        |        |         |         |   |
| 4970   | N   | N   | . LYS LYS LYS B B 227 227 . | 0.1963 | 0.1742 | 0.1326 | 0.0257  | 0.0221  |   |
| 0.0205 | 1   | .   |                             |        |        |        |         |         |   |
| 4971   | CA  | CA  | . LYS LYS LYS B B 227 227 . | 0.2282 | 0.1968 | 0.1636 | 0.0278  | 0.0328  |   |
| 0.0074 | 1   | .   |                             |        |        |        |         |         |   |











|        |     |     |                             |        |        |        |         |         |   |
|--------|-----|-----|-----------------------------|--------|--------|--------|---------|---------|---|
| 5092   | SD  | SD  | . MET MET MET B B 243 243 . | 0.1911 | 0.1584 | 0.1610 | 0.0060  | 0.0206  | - |
| 0.0368 | 1   | .   |                             |        |        |        |         |         |   |
| 5093   | CE  | CE  | . MET MET MET B B 243 243 . | 0.1626 | 0.1665 | 0.2513 | -0.0515 | -0.0329 | - |
| 0.0561 | 1   | .   |                             |        |        |        |         |         |   |
| 5094   | C   | C   | . MET MET MET B B 243 243 . | 0.1285 | 0.1245 | 0.1330 | 0.0252  | 0.0011  | - |
| 0.0153 | 1   | .   |                             |        |        |        |         |         |   |
| 5095   | O   | O   | . MET MET MET B B 243 243 . | 0.1732 | 0.1280 | 0.0897 | 0.0076  | -0.0020 | - |
| 0.0104 | 1   | .   |                             |        |        |        |         |         |   |
| 5096   | N   | N   | . ASP ASP ASP B B 244 244 . | 0.1450 | 0.1035 | 0.0717 | 0.0463  | 0.0056  | - |
| 0.0141 | 1   | .   |                             |        |        |        |         |         |   |
| 5097   | CA  | CA  | . ASP ASP ASP B B 244 244 . | 0.1181 | 0.1186 | 0.0885 | 0.0298  | -0.0033 | - |
| 0.0065 | 1   | .   |                             |        |        |        |         |         |   |
| 5098   | CB  | CB  | . ASP ASP ASP B B 244 244 . | 0.1113 | 0.1057 | 0.0911 | 0.0420  | 0.0001  | - |
| 0.0164 | 1   | .   |                             |        |        |        |         |         |   |
| 5099   | CG  | CG  | . ASP ASP ASP B B 244 244 . | 0.1374 | 0.1052 | 0.1137 | 0.0377  | 0.0167  | - |
| 0.0071 | 1   | .   |                             |        |        |        |         |         |   |
| 5100   | OD1 | OD1 | . ASP ASP ASP B B 244 244 . | 0.1228 | 0.1338 | 0.0773 | 0.0355  | 0.0100  | - |
| 0.0300 | 1   | .   |                             |        |        |        |         |         |   |
| 5101   | OD2 | OD2 | . ASP ASP ASP B B 244 244 . | 0.1076 | 0.1312 | 0.0951 | 0.0048  | -0.0142 | - |
| 0.0288 | 1   | .   |                             |        |        |        |         |         |   |
| 5102   | C   | C   | . ASP ASP ASP B B 244 244 . | 0.1336 | 0.1161 | 0.1152 | 0.0144  | -0.0072 | - |
| 0.0032 | 1   | .   |                             |        |        |        |         |         |   |
| 5103   | O   | O   | . ASP ASP ASP B B 244 244 . | 0.1500 | 0.1332 | 0.1360 | 0.0199  | -0.0171 | - |
| 0.0034 | 1   | .   |                             |        |        |        |         |         |   |
| 5104   | N   | N   | . VAL VAL VAL B B 245 245 . | 0.0978 | 0.1098 | 0.0911 | 0.0084  | 0.0079  | - |
| 0.0059 | 1   | .   |                             |        |        |        |         |         |   |
| 5105   | CA  | CA  | . VAL VAL VAL B B 245 245 . | 0.1500 | 0.1169 | 0.0914 | 0.0007  | -0.0080 | - |
| 0.0078 | 1   | .   |                             |        |        |        |         |         |   |
| 5106   | CB  | CB  | . VAL VAL VAL B B 245 245 . | 0.1504 | 0.1101 | 0.1133 | 0.0009  | 0.0069  | - |
| 0.0034 | 1   | .   |                             |        |        |        |         |         |   |
| 5107   | CG1 | CG1 | . VAL VAL VAL B B 245 245 . | 0.1670 | 0.0798 | 0.0654 | -0.0103 | -0.0139 | - |
| 0.0037 | 1   | .   |                             |        |        |        |         |         |   |
| 5108   | CG2 | CG2 | . VAL VAL VAL B B 245 245 . | 0.1537 | 0.1302 | 0.0698 | -0.0068 | -0.0065 | - |
| 0.0090 | 1   | .   |                             |        |        |        |         |         |   |
| 5109   | C   | C   | . VAL VAL VAL B B 245 245 . | 0.1311 | 0.1121 | 0.1188 | 0.0113  | -0.0006 | - |
| 0.0060 | 1   | .   |                             |        |        |        |         |         |   |
| 5110   | O   | O   | . VAL VAL VAL B B 245 245 . | 0.1176 | 0.1230 | 0.1106 | 0.0143  | -0.0154 | - |
| 0.0009 | 1   | .   |                             |        |        |        |         |         |   |
| 5111   | N   | N   | . ALA ALA ALA B B 246 246 . | 0.1215 | 0.1091 | 0.0965 | 0.0067  | 0.0064  | - |
| 0.0068 | 1   | .   |                             |        |        |        |         |         |   |
| 5112   | CA  | CA  | . ALA ALA ALA B B 246 246 . | 0.1444 | 0.1048 | 0.0908 | 0.0084  | -0.0044 | - |
| 0.0162 | 1   | .   |                             |        |        |        |         |         |   |
| 5113   | CB  | CB  | . ALA ALA ALA B B 246 246 . | 0.1366 | 0.0916 | 0.0631 | -0.0044 | -0.0012 | - |
| 0.0180 | 1   | .   |                             |        |        |        |         |         |   |
| 5114   | C   | C   | . ALA ALA ALA B B 246 246 . | 0.1467 | 0.1331 | 0.0978 | -0.0015 | -0.0062 | - |
| 0.0212 | 1   | .   |                             |        |        |        |         |         |   |
| 5115   | O   | O   | . ALA ALA ALA B B 246 246 . | 0.1594 | 0.1176 | 0.1052 | 0.0274  | -0.0323 | - |
| 0.0351 | 1   | .   |                             |        |        |        |         |         |   |
| 5116   | N   | N   | . ALA ALA ALA B B 247 247 . | 0.1194 | 0.0912 | 0.0931 | 0.0092  | -0.0210 | - |
| 0.0092 | 1   | .   |                             |        |        |        |         |         |   |
| 5117   | CA  | CA  | . ALA ALA ALA B B 247 247 . | 0.1125 | 0.1202 | 0.1010 | 0.0111  | -0.0058 | - |
| 0.0073 | 1   | .   |                             |        |        |        |         |         |   |
| 5118   | CB  | CB  | . ALA ALA ALA B B 247 247 . | 0.0972 | 0.1002 | 0.0887 | 0.0091  | 0.0082  | - |
| 0.0212 | 1   | .   |                             |        |        |        |         |         |   |
| 5119   | C   | C   | . ALA ALA ALA B B 247 247 . | 0.1409 | 0.1264 | 0.1194 | 0.0059  | -0.0028 | - |
| 0.0099 | 1   | .   |                             |        |        |        |         |         |   |
| 5120   | O   | O   | . ALA ALA ALA B B 247 247 . | 0.1389 | 0.1348 | 0.1303 | 0.0158  | -0.0020 | - |
| 0.0072 | 1   | .   |                             |        |        |        |         |         |   |
| 5121   | N   | N   | . SER SER SER B B 248 248 . | 0.1335 | 0.1384 | 0.1323 | 0.0225  | -0.0249 | - |
| 0.0353 | 1   | .   |                             |        |        |        |         |         |   |



|        |     |     |                             |        |        |        |         |         |   |
|--------|-----|-----|-----------------------------|--------|--------|--------|---------|---------|---|
| 5152   | CE1 | CE1 | . TYR TYR TYR B B 251 251 . | 0.1817 | 0.1681 | 0.1830 | -0.0098 | -0.0355 |   |
| 0.0051 | 1   | .   |                             |        |        |        |         |         |   |
| 5153   | CZ  | CZ  | . TYR TYR TYR B B 251 251 . | 0.1801 | 0.1322 | 0.1826 | 0.0097  | -0.0069 |   |
| 0.0312 | 1   | .   |                             |        |        |        |         |         |   |
| 5154   | OH  | OH  | . TYR TYR TYR B B 251 251 . | 0.1423 | 0.1898 | 0.2335 | 0.0452  | -0.0438 |   |
| 0.0478 | 1   | .   |                             |        |        |        |         |         |   |
| 5155   | CE2 | CE2 | . TYR TYR TYR B B 251 251 . | 0.2055 | 0.1767 | 0.1759 | 0.0096  | -0.0157 |   |
| 0.0355 | 1   | .   |                             |        |        |        |         |         |   |
| 5156   | CD2 | CD2 | . TYR TYR TYR B B 251 251 . | 0.1996 | 0.1639 | 0.1600 | 0.0303  | -0.0416 | - |
| 0.0033 | 1   | .   |                             |        |        |        |         |         |   |
| 5157   | C   | C   | . TYR TYR TYR B B 251 251 . | 0.1345 | 0.1563 | 0.1339 | -0.0044 | -0.0126 | - |
| 0.0116 | 1   | .   |                             |        |        |        |         |         |   |
| 5158   | O   | O   | . TYR TYR TYR B B 251 251 . | 0.1796 | 0.1633 | 0.1785 | 0.0020  | -0.0360 | - |
| 0.0220 | 1   | .   |                             |        |        |        |         |         |   |
| 5159   | N   | N   | . ARG ARG ARG B B 252 252 . | 0.1607 | 0.1449 | 0.1632 | -0.0131 | -0.0445 | - |
| 0.0204 | 1   | .   |                             |        |        |        |         |         |   |
| 5160   | CA  | CA  | . ARG ARG ARG B B 252 252 . | 0.1672 | 0.1562 | 0.2019 | -0.0005 | -0.0384 | - |
| 0.0177 | 1   | .   |                             |        |        |        |         |         |   |
| 5161   | CB  | CB  | . ARG ARG ARG B B 252 252 . | 0.1718 | 0.1874 | 0.2154 | -0.0079 | -0.0380 | - |
| 0.0206 | 1   | .   |                             |        |        |        |         |         |   |
| 5162   | CG  | CG  | . ARG ARG ARG B B 252 252 . | 0.2029 | 0.2066 | 0.2281 | -0.0271 | -0.0029 | - |
| 0.0099 | 1   | .   |                             |        |        |        |         |         |   |
| 5163   | CD  | CD  | . ARG ARG ARG B B 252 252 . | 0.2981 | 0.2907 | 0.2711 | -0.0062 | 0.0005  |   |
| 0.0064 | 1   | .   |                             |        |        |        |         |         |   |
| 5164   | NE  | NE  | . ARG ARG ARG B B 252 252 . | 0.2546 | 0.2541 | 0.3058 | 0.0223  | -0.0456 |   |
| 0.0079 | 1   | .   |                             |        |        |        |         |         |   |
| 5165   | CZ  | CZ  | . ARG ARG ARG B B 252 252 . | 0.2901 | 0.2515 | 0.2624 | 0.0279  | -0.0421 |   |
| 0.0066 | 1   | .   |                             |        |        |        |         |         |   |
| 5166   | NH1 | NH1 | . ARG ARG ARG B B 252 252 . | 0.2431 | 0.2857 | 0.2884 | 0.0534  | -0.0414 |   |
| 0.0095 | 1   | .   |                             |        |        |        |         |         |   |
| 5167   | NH2 | NH2 | . ARG ARG ARG B B 252 252 . | 0.3274 | 0.2892 | 0.2558 | 0.0538  | -0.0661 |   |
| 0.0034 | 1   | .   |                             |        |        |        |         |         |   |
| 5168   | C   | C   | . ARG ARG ARG B B 252 252 . | 0.1821 | 0.1858 | 0.1929 | -0.0052 | -0.0243 | - |
| 0.0213 | 1   | .   |                             |        |        |        |         |         |   |
| 5169   | O   | O   | . ARG ARG ARG B B 252 252 . | 0.1804 | 0.1776 | 0.2040 | -0.0145 | -0.0196 | - |
| 0.0249 | 1   | .   |                             |        |        |        |         |         |   |
| 5170   | N   | N   | . ASP ASP ASP B B 253 253 . | 0.2093 | 0.2043 | 0.2069 | 0.0054  | -0.0265 | - |
| 0.0080 | 1   | .   |                             |        |        |        |         |         |   |
| 5171   | CA  | CA  | . ASP ASP ASP B B 253 253 . | 0.2105 | 0.1837 | 0.2461 | -0.0038 | -0.0233 |   |
| 0.0021 | 1   | .   |                             |        |        |        |         |         |   |
| 5172   | CB  | CB  | . ASP ASP ASP B B 253 253 . | 0.2194 | 0.2018 | 0.2535 | -0.0036 | -0.0265 |   |
| 0.0042 | 1   | .   |                             |        |        |        |         |         |   |
| 5173   | CG  | CG  | . ASP ASP ASP B B 253 253 . | 0.3077 | 0.3068 | 0.3185 | -0.0090 | -0.0192 | - |
| 0.0350 | 1   | .   |                             |        |        |        |         |         |   |
| 5174   | OD1 | OD1 | . ASP ASP ASP B B 253 253 . | 0.4174 | 0.4048 | 0.3975 | -0.0618 | -0.0714 | - |
| 0.1211 | 1   | .   |                             |        |        |        |         |         |   |
| 5175   | OD2 | OD2 | . ASP ASP ASP B B 253 253 . | 0.3378 | 0.3079 | 0.3543 | 0.0222  | -0.0149 | - |
| 0.0281 | 1   | .   |                             |        |        |        |         |         |   |
| 5176   | C   | C   | . ASP ASP ASP B B 253 253 . | 0.1898 | 0.1756 | 0.2115 | -0.0015 | -0.0117 |   |
| 0.0163 | 1   | .   |                             |        |        |        |         |         |   |
| 5177   | O   | O   | . ASP ASP ASP B B 253 253 . | 0.1750 | 0.1520 | 0.3050 | -0.0214 | -0.0197 |   |
| 0.0185 | 1   | .   |                             |        |        |        |         |         |   |
| 5178   | N   | N   | . GLY GLY GLY B B 254 254 . | 0.1990 | 0.1696 | 0.1942 | -0.0056 | -0.0192 | - |
| 0.0050 | 1   | .   |                             |        |        |        |         |         |   |
| 5179   | CA  | CA  | . GLY GLY GLY B B 254 254 . | 0.1735 | 0.1473 | 0.1677 | 0.0111  | 0.0031  |   |
| 0.0088 | 1   | .   |                             |        |        |        |         |         |   |
| 5180   | C   | C   | . GLY GLY GLY B B 254 254 . | 0.1673 | 0.1468 | 0.1646 | 0.0032  | -0.0004 |   |
| 0.0007 | 1   | .   |                             |        |        |        |         |         |   |
| 5181   | O   | O   | . GLY GLY GLY B B 254 254 . | 0.1707 | 0.1413 | 0.1877 | 0.0016  | -0.0069 | - |
| 0.0029 | 1   | .   |                             |        |        |        |         |         |   |

|        |     |     |                             |        |        |        |         |         |   |
|--------|-----|-----|-----------------------------|--------|--------|--------|---------|---------|---|
| 5182   | N   | N   | . LYS LYS LYS B B 255 255 . | 0.1490 | 0.1704 | 0.2030 | 0.0067  | 0.0020  | - |
| 0.0054 | 1   | .   |                             |        |        |        |         |         |   |
| 5183   | CA  | CA  | . LYS LYS LYS B B 255 255 . | 0.1337 | 0.1529 | 0.2159 | 0.0014  | 0.0072  | - |
| 0.0192 | 1   | .   |                             |        |        |        |         |         |   |
| 5184   | CB  | CB  | . LYS LYS LYS B B 255 255 . | 0.1521 | 0.1567 | 0.2449 | -0.0167 | 0.0054  | - |
| 0.0083 | 1   | .   |                             |        |        |        |         |         |   |
| 5185   | CG  | CG  | . LYS LYS LYS B B 255 255 . | 0.1518 | 0.1953 | 0.2604 | -0.0258 | 0.0057  |   |
| 0.0015 | 1   | .   |                             |        |        |        |         |         |   |
| 5186   | CD  | CD  | . LYS LYS LYS B B 255 255 . | 0.1929 | 0.2069 | 0.3304 | -0.0663 | 0.0071  |   |
| 0.0279 | 1   | .   |                             |        |        |        |         |         |   |
| 5187   | CE  | CE  | . LYS LYS LYS B B 255 255 . | 0.1579 | 0.2211 | 0.3494 | -0.0288 | 0.0438  |   |
| 0.0278 | 1   | .   |                             |        |        |        |         |         |   |
| 5188   | NZ  | NZ  | . LYS LYS LYS B B 255 255 . | 0.1761 | 0.3038 | 0.3815 | -0.0436 | 0.0546  |   |
| 0.0281 | 1   | .   |                             |        |        |        |         |         |   |
| 5189   | C   | C   | . LYS LYS LYS B B 255 255 . | 0.1564 | 0.1609 | 0.1991 | -0.0010 | 0.0014  | - |
| 0.0260 | 1   | .   |                             |        |        |        |         |         |   |
| 5190   | O   | O   | . LYS LYS LYS B B 255 255 . | 0.1502 | 0.1394 | 0.1892 | 0.0101  | 0.0147  | - |
| 0.0181 | 1   | .   |                             |        |        |        |         |         |   |
| 5191   | N   | N   | . TYR TYR TYR B B 256 256 . | 0.1263 | 0.1677 | 0.1987 | 0.0069  | -0.0139 | - |
| 0.0192 | 1   | .   |                             |        |        |        |         |         |   |
| 5192   | CA  | CA  | . TYR TYR TYR B B 256 256 . | 0.1274 | 0.1509 | 0.1820 | 0.0037  | -0.0313 | - |
| 0.0301 | 1   | .   |                             |        |        |        |         |         |   |
| 5193   | CB  | CB  | . TYR TYR TYR B B 256 256 . | 0.1130 | 0.1348 | 0.1886 | -0.0030 | -0.0280 | - |
| 0.0088 | 1   | .   |                             |        |        |        |         |         |   |
| 5194   | CG  | CG  | . TYR TYR TYR B B 256 256 . | 0.0902 | 0.1111 | 0.1271 | -0.0083 | -0.0193 |   |
| 0.0001 | 1   | .   |                             |        |        |        |         |         |   |
| 5195   | CD1 | CD1 | . TYR TYR TYR B B 256 256 . | 0.1118 | 0.1306 | 0.1861 | 0.0057  | -0.0086 | - |
| 0.0441 | 1   | .   |                             |        |        |        |         |         |   |
| 5196   | CE1 | CE1 | . TYR TYR TYR B B 256 256 . | 0.0874 | 0.0732 | 0.1018 | 0.0136  | -0.0286 |   |
| 0.0207 | 1   | .   |                             |        |        |        |         |         |   |
| 5197   | CZ  | CZ  | . TYR TYR TYR B B 256 256 . | 0.1075 | 0.0787 | 0.1020 | 0.0138  | -0.0072 |   |
| 0.0024 | 1   | .   |                             |        |        |        |         |         |   |
| 5198   | OH  | OH  | . TYR TYR TYR B B 256 256 . | 0.1153 | 0.1115 | 0.1532 | -0.0028 | -0.0098 |   |
| 0.0021 | 1   | .   |                             |        |        |        |         |         |   |
| 5199   | CE2 | CE2 | . TYR TYR TYR B B 256 256 . | 0.0991 | 0.0794 | 0.1871 | 0.0248  | -0.0174 | - |
| 0.0144 | 1   | .   |                             |        |        |        |         |         |   |
| 5200   | CD2 | CD2 | . TYR TYR TYR B B 256 256 . | 0.0972 | 0.1044 | 0.1570 | 0.0033  | -0.0310 | - |
| 0.0371 | 1   | .   |                             |        |        |        |         |         |   |
| 5201   | C   | C   | . TYR TYR TYR B B 256 256 . | 0.1555 | 0.1667 | 0.2091 | 0.0096  | -0.0265 | - |
| 0.0292 | 1   | .   |                             |        |        |        |         |         |   |
| 5202   | O   | O   | . TYR TYR TYR B B 256 256 . | 0.1825 | 0.1610 | 0.2274 | 0.0033  | -0.0281 | - |
| 0.0409 | 1   | .   |                             |        |        |        |         |         |   |
| 5203   | N   | N   | . ASP ASP ASP B B 257 257 . | 0.1605 | 0.1628 | 0.2029 | 0.0164  | -0.0544 | - |
| 0.0381 | 1   | .   |                             |        |        |        |         |         |   |
| 5204   | CA  | CA  | . ASP ASP ASP B B 257 257 . | 0.2038 | 0.2189 | 0.2360 | 0.0110  | -0.0524 | - |
| 0.0423 | 1   | .   |                             |        |        |        |         |         |   |
| 5205   | CB  | CB  | . ASP ASP ASP B B 257 257 . | 0.2066 | 0.2225 | 0.2398 | -0.0007 | -0.0501 | - |
| 0.0562 | 1   | .   |                             |        |        |        |         |         |   |
| 5206   | CG  | CG  | . ASP ASP ASP B B 257 257 . | 0.2544 | 0.3328 | 0.2796 | 0.0323  | -0.0633 | - |
| 0.0820 | 1   | .   |                             |        |        |        |         |         |   |
| 5207   | OD1 | OD1 | . ASP ASP ASP B B 257 257 . | 0.2062 | 0.3025 | 0.4175 | 0.0532  | -0.0999 | - |
| 0.1182 | 1   | .   |                             |        |        |        |         |         |   |
| 5208   | OD2 | OD2 | . ASP ASP ASP B B 257 257 . | 0.2733 | 0.3051 | 0.3112 | 0.0469  | -0.1120 | - |
| 0.1401 | 1   | .   |                             |        |        |        |         |         |   |
| 5209   | C   | C   | . ASP ASP ASP B B 257 257 . | 0.1845 | 0.2118 | 0.2148 | 0.0091  | -0.0581 | - |
| 0.0307 | 1   | .   |                             |        |        |        |         |         |   |
| 5210   | O   | O   | . ASP ASP ASP B B 257 257 . | 0.1893 | 0.2050 | 0.2524 | 0.0213  | -0.0465 | - |
| 0.0423 | 1   | .   |                             |        |        |        |         |         |   |
| 5211   | N   | N   | . LEU LEU LEU B B 258 258 . | 0.1974 | 0.2451 | 0.2477 | -0.0011 | -0.0625 | - |
| 0.0348 | 1   | .   |                             |        |        |        |         |         |   |











|        |     |     |                             |        |        |        |         |         |   |
|--------|-----|-----|-----------------------------|--------|--------|--------|---------|---------|---|
| 5332   | CB  | CB  | . ASP ASP ASP B B 273 273 . | 0.2476 | 0.2156 | 0.2287 | -0.0084 | 0.0160  |   |
| 0.0319 | 1   | .   |                             |        |        |        |         |         |   |
| 5333   | CG  | CG  | . ASP ASP ASP B B 273 273 . | 0.3227 | 0.2750 | 0.2838 | -0.0098 | 0.0167  |   |
| 0.0357 | 1   | .   |                             |        |        |        |         |         |   |
| 5334   | OD1 | OD1 | . ASP ASP ASP B B 273 273 . | 0.3542 | 0.2838 | 0.3599 | 0.0125  | 0.0259  |   |
| 0.0529 | 1   | .   |                             |        |        |        |         |         |   |
| 5335   | OD2 | OD2 | . ASP ASP ASP B B 273 273 . | 0.3615 | 0.4539 | 0.2261 | -0.0457 | 0.0657  | - |
| 0.0689 | 1   | .   |                             |        |        |        |         |         |   |
| 5336   | C   | C   | . ASP ASP ASP B B 273 273 . | 0.2150 | 0.2066 | 0.2174 | 0.0065  | 0.0109  |   |
| 0.0137 | 1   | .   |                             |        |        |        |         |         |   |
| 5337   | O   | O   | . ASP ASP ASP B B 273 273 . | 0.1866 | 0.1939 | 0.2081 | 0.0065  | 0.0132  | - |
| 0.0196 | 1   | .   |                             |        |        |        |         |         |   |
| 5338   | N   | N   | . GLN GLN GLN B B 274 274 . | 0.2066 | 0.2013 | 0.2123 | 0.0099  | 0.0129  |   |
| 0.0184 | 1   | .   |                             |        |        |        |         |         |   |
| 5339   | CA  | CA  | . GLN GLN GLN B B 274 274 . | 0.2033 | 0.2055 | 0.2412 | 0.0025  | 0.0153  |   |
| 0.0069 | 1   | .   |                             |        |        |        |         |         |   |
| 5340   | CB  | CB  | . GLN GLN GLN B B 274 274 . | 0.2119 | 0.2049 | 0.2199 | 0.0004  | 0.0316  | - |
| 0.0177 | 1   | .   |                             |        |        |        |         |         |   |
| 5341   | CG  | CG  | . GLN GLN GLN B B 274 274 . | 0.2340 | 0.2463 | 0.2440 | -0.0031 | 0.0192  |   |
| 0.0079 | 1   | .   |                             |        |        |        |         |         |   |
| 5342   | CD  | CD  | . GLN GLN GLN B B 274 274 . | 0.2603 | 0.2322 | 0.3124 | -0.0281 | 0.0528  | - |
| 0.0194 | 1   | .   |                             |        |        |        |         |         |   |
| 5343   | OE1 | OE1 | . GLN GLN GLN B B 274 274 . | 0.2384 | 0.2174 | 0.2643 | -0.0232 | 0.0572  | - |
| 0.0284 | 1   | .   |                             |        |        |        |         |         |   |
| 5344   | NE2 | NE2 | . GLN GLN GLN B B 274 274 . | 0.2797 | 0.3122 | 0.3926 | -0.0436 | -0.0007 | - |
| 0.0203 | 1   | .   |                             |        |        |        |         |         |   |
| 5345   | C   | C   | . GLN GLN GLN B B 274 274 . | 0.1975 | 0.1910 | 0.2159 | 0.0042  | 0.0181  |   |
| 0.0121 | 1   | .   |                             |        |        |        |         |         |   |
| 5346   | O   | O   | . GLN GLN GLN B B 274 274 . | 0.1788 | 0.1657 | 0.2235 | 0.0093  | 0.0202  | - |
| 0.0106 | 1   | .   |                             |        |        |        |         |         |   |
| 5347   | N   | N   | . LEU LEU LEU B B 275 275 . | 0.1638 | 0.1716 | 0.2118 | 0.0095  | 0.0044  |   |
| 0.0148 | 1   | .   |                             |        |        |        |         |         |   |
| 5348   | CA  | CA  | . LEU LEU LEU B B 275 275 . | 0.1717 | 0.1781 | 0.1738 | 0.0049  | 0.0116  |   |
| 0.0114 | 1   | .   |                             |        |        |        |         |         |   |
| 5349   | CB  | CB  | . LEU LEU LEU B B 275 275 . | 0.1868 | 0.1718 | 0.2071 | 0.0178  | 0.0269  |   |
| 0.0018 | 1   | .   |                             |        |        |        |         |         |   |
| 5350   | CG  | CG  | . LEU LEU LEU B B 275 275 . | 0.1836 | 0.1870 | 0.1735 | 0.0475  | 0.0121  |   |
| 0.0169 | 1   | .   |                             |        |        |        |         |         |   |
| 5351   | CD1 | CD1 | . LEU LEU LEU B B 275 275 . | 0.2211 | 0.1409 | 0.2070 | 0.0399  | -0.0329 |   |
| 0.0228 | 1   | .   |                             |        |        |        |         |         |   |
| 5352   | CD2 | CD2 | . LEU LEU LEU B B 275 275 . | 0.1989 | 0.1288 | 0.1239 | 0.0053  | 0.0207  | - |
| 0.0571 | 1   | .   |                             |        |        |        |         |         |   |
| 5353   | C   | C   | . LEU LEU LEU B B 275 275 . | 0.1685 | 0.1676 | 0.1851 | 0.0121  | 0.0121  |   |
| 0.0146 | 1   | .   |                             |        |        |        |         |         |   |
| 5354   | O   | O   | . LEU LEU LEU B B 275 275 . | 0.1595 | 0.1912 | 0.1836 | 0.0346  | 0.0290  |   |
| 0.0350 | 1   | .   |                             |        |        |        |         |         |   |
| 5355   | N   | N   | . GLY GLY GLY B B 276 276 . | 0.1758 | 0.1179 | 0.1451 | 0.0164  | -0.0021 |   |
| 0.0327 | 1   | .   |                             |        |        |        |         |         |   |
| 5356   | CA  | CA  | . GLY GLY GLY B B 276 276 . | 0.1502 | 0.1458 | 0.1675 | 0.0129  | 0.0040  |   |
| 0.0185 | 1   | .   |                             |        |        |        |         |         |   |
| 5357   | C   | C   | . GLY GLY GLY B B 276 276 . | 0.1730 | 0.1644 | 0.1856 | 0.0027  | 0.0099  |   |
| 0.0095 | 1   | .   |                             |        |        |        |         |         |   |
| 5358   | O   | O   | . GLY GLY GLY B B 276 276 . | 0.1740 | 0.1645 | 0.1535 | -0.0094 | 0.0042  |   |
| 0.0322 | 1   | .   |                             |        |        |        |         |         |   |
| 5359   | N   | N   | . ALA ALA ALA B B 277 277 . | 0.1804 | 0.1565 | 0.1980 | 0.0009  | 0.0364  |   |
| 0.0196 | 1   | .   |                             |        |        |        |         |         |   |
| 5360   | CA  | CA  | . ALA ALA ALA B B 277 277 . | 0.1459 | 0.1603 | 0.1958 | 0.0038  | 0.0331  |   |
| 0.0148 | 1   | .   |                             |        |        |        |         |         |   |
| 5361   | CB  | CB  | . ALA ALA ALA B B 277 277 . | 0.1587 | 0.1505 | 0.2242 | -0.0059 | 0.0284  |   |
| 0.0232 | 1   | .   |                             |        |        |        |         |         |   |

|        |     |     |                             |        |        |        |         |         |   |
|--------|-----|-----|-----------------------------|--------|--------|--------|---------|---------|---|
| 5362   | C   | C   | . ALA ALA ALA B B 277 277 . | 0.1593 | 0.1694 | 0.1651 | -0.0070 | 0.0309  |   |
| 0.0059 | 1   | .   |                             |        |        |        |         |         |   |
| 5363   | O   | O   | . ALA ALA ALA B B 277 277 . | 0.1908 | 0.1736 | 0.1644 | -0.0086 | 0.0163  | - |
| 0.0023 | 1   | .   |                             |        |        |        |         |         |   |
| 5364   | N   | N   | . LEU LEU LEU B B 278 278 . | 0.1550 | 0.1772 | 0.1901 | 0.0003  | -0.0018 | - |
| 0.0062 | 1   | .   |                             |        |        |        |         |         |   |
| 5365   | CA  | CA  | . LEU LEU LEU B B 278 278 . | 0.1500 | 0.1618 | 0.1705 | -0.0023 | 0.0048  |   |
| 0.0105 | 1   | .   |                             |        |        |        |         |         |   |
| 5366   | CB  | CB  | . LEU LEU LEU B B 278 278 . | 0.1605 | 0.1880 | 0.1809 | 0.0278  | -0.0006 |   |
| 0.0076 | 1   | .   |                             |        |        |        |         |         |   |
| 5367   | CG  | CG  | . LEU LEU LEU B B 278 278 . | 0.1881 | 0.2273 | 0.2049 | 0.0377  | 0.0059  |   |
| 0.0181 | 1   | .   |                             |        |        |        |         |         |   |
| 5368   | CD1 | CD1 | . LEU LEU LEU B B 278 278 . | 0.2121 | 0.2460 | 0.2901 | 0.0369  | 0.0284  |   |
| 0.0120 | 1   | .   |                             |        |        |        |         |         |   |
| 5369   | CD2 | CD2 | . LEU LEU LEU B B 278 278 . | 0.2398 | 0.2210 | 0.2400 | 0.0220  | 0.0019  | - |
| 0.0267 | 1   | .   |                             |        |        |        |         |         |   |
| 5370   | C   | C   | . LEU LEU LEU B B 278 278 . | 0.1617 | 0.1640 | 0.1797 | 0.0101  | 0.0030  |   |
| 0.0010 | 1   | .   |                             |        |        |        |         |         |   |
| 5371   | O   | O   | . LEU LEU LEU B B 278 278 . | 0.1537 | 0.1542 | 0.1628 | 0.0127  | 0.0005  | - |
| 0.0077 | 1   | .   |                             |        |        |        |         |         |   |
| 5372   | N   | N   | . TYR TYR TYR B B 279 279 . | 0.1152 | 0.1297 | 0.1314 | -0.0028 | 0.0120  | - |
| 0.0022 | 1   | .   |                             |        |        |        |         |         |   |
| 5373   | CA  | CA  | . TYR TYR TYR B B 279 279 . | 0.1269 | 0.1240 | 0.1317 | 0.0001  | 0.0096  | - |
| 0.0037 | 1   | .   |                             |        |        |        |         |         |   |
| 5374   | CB  | CB  | . TYR TYR TYR B B 279 279 . | 0.1103 | 0.1080 | 0.1029 | 0.0234  | 0.0083  | - |
| 0.0064 | 1   | .   |                             |        |        |        |         |         |   |
| 5375   | CG  | CG  | . TYR TYR TYR B B 279 279 . | 0.1154 | 0.0516 | 0.0743 | 0.0389  | -0.0115 |   |
| 0.0010 | 1   | .   |                             |        |        |        |         |         |   |
| 5376   | CD1 | CD1 | . TYR TYR TYR B B 279 279 . | 0.0839 | 0.1066 | 0.1089 | 0.0208  | -0.0158 | - |
| 0.0289 | 1   | .   |                             |        |        |        |         |         |   |
| 5377   | CE1 | CE1 | . TYR TYR TYR B B 279 279 . | 0.1230 | 0.0969 | 0.1085 | 0.0382  | 0.0200  |   |
| 0.0011 | 1   | .   |                             |        |        |        |         |         |   |
| 5378   | CZ  | CZ  | . TYR TYR TYR B B 279 279 . | 0.1216 | 0.1233 | 0.1099 | 0.0363  | -0.0277 | - |
| 0.0059 | 1   | .   |                             |        |        |        |         |         |   |
| 5379   | OH  | OH  | . TYR TYR TYR B B 279 279 . | 0.1848 | 0.1141 | 0.1385 | 0.0129  | 0.0210  | - |
| 0.0007 | 1   | .   |                             |        |        |        |         |         |   |
| 5380   | CE2 | CE2 | . TYR TYR TYR B B 279 279 . | 0.1848 | 0.0997 | 0.1011 | 0.0425  | 0.0023  |   |
| 0.0194 | 1   | .   |                             |        |        |        |         |         |   |
| 5381   | CD2 | CD2 | . TYR TYR TYR B B 279 279 . | 0.0877 | 0.0948 | 0.1326 | 0.0245  | 0.0238  | - |
| 0.0062 | 1   | .   |                             |        |        |        |         |         |   |
| 5382   | C   | C   | . TYR TYR TYR B B 279 279 . | 0.1354 | 0.1350 | 0.1320 | 0.0047  | 0.0069  |   |
| 0.0001 | 1   | .   |                             |        |        |        |         |         |   |
| 5383   | O   | O   | . TYR TYR TYR B B 279 279 . | 0.1801 | 0.1369 | 0.1389 | 0.0112  | 0.0001  | - |
| 0.0121 | 1   | .   |                             |        |        |        |         |         |   |
| 5384   | N   | N   | . GLN GLN GLN B B 280 280 . | 0.1445 | 0.1464 | 0.1263 | 0.0094  | 0.0179  |   |
| 0.0019 | 1   | .   |                             |        |        |        |         |         |   |
| 5385   | CA  | CA  | . GLN GLN GLN B B 280 280 . | 0.1471 | 0.1634 | 0.1565 | 0.0216  | 0.0076  |   |
| 0.0007 | 1   | .   |                             |        |        |        |         |         |   |
| 5386   | CB  | CB  | . GLN GLN GLN B B 280 280 . | 0.1868 | 0.1789 | 0.1530 | 0.0240  | 0.0055  |   |
| 0.0099 | 1   | .   |                             |        |        |        |         |         |   |
| 5387   | CG  | CG  | . GLN GLN GLN B B 280 280 . | 0.2182 | 0.2084 | 0.2323 | 0.0452  | -0.0071 |   |
| 0.0061 | 1   | .   |                             |        |        |        |         |         |   |
| 5388   | CD  | CD  | . GLN GLN GLN B B 280 280 . | 0.3044 | 0.3159 | 0.3887 | 0.0443  | -0.0470 | - |
| 0.0145 | 1   | .   |                             |        |        |        |         |         |   |
| 5389   | OE1 | OE1 | . GLN GLN GLN B B 280 280 . | 0.3488 | 0.3900 | 0.4530 | 0.0368  | -0.0302 | - |
| 0.0395 | 1   | .   |                             |        |        |        |         |         |   |
| 5390   | NE2 | NE2 | . GLN GLN GLN B B 280 280 . | 0.3738 | 0.2982 | 0.4184 | 0.0511  | -0.0806 |   |
| 0.0688 | 1   | .   |                             |        |        |        |         |         |   |
| 5391   | C   | C   | . GLN GLN GLN B B 280 280 . | 0.1508 | 0.1470 | 0.1588 | 0.0196  | 0.0182  |   |
| 0.0012 | 1   | .   |                             |        |        |        |         |         |   |

|        |     |     |                             |        |        |        |         |         |   |
|--------|-----|-----|-----------------------------|--------|--------|--------|---------|---------|---|
| 5392   | O   | O   | . GLN GLN GLN B B 280 280 . | 0.1624 | 0.1480 | 0.1526 | 0.0085  | 0.0298  | - |
| 0.0013 | 1   | .   |                             |        |        |        |         |         |   |
| 5393   | N   | N   | . ASP ASP ASP B B 281 281 . | 0.1506 | 0.1642 | 0.1631 | 0.0408  | 0.0068  | - |
| 0.0136 | 1   | .   |                             |        |        |        |         |         |   |
| 5394   | CA  | CA  | . ASP ASP ASP B B 281 281 . | 0.1722 | 0.1821 | 0.1844 | 0.0253  | -0.0021 |   |
| 0.0105 | 1   | .   |                             |        |        |        |         |         |   |
| 5395   | CB  | CB  | . ASP ASP ASP B B 281 281 . | 0.2000 | 0.1820 | 0.1982 | 0.0131  | 0.0070  |   |
| 0.0086 | 1   | .   |                             |        |        |        |         |         |   |
| 5396   | CG  | CG  | . ASP ASP ASP B B 281 281 . | 0.2792 | 0.2705 | 0.2930 | -0.0223 | 0.0095  |   |
| 0.0166 | 1   | .   |                             |        |        |        |         |         |   |
| 5397   | OD1 | OD1 | . ASP ASP ASP B B 281 281 . | 0.2811 | 0.3528 | 0.3407 | -0.0197 | 0.0414  |   |
| 0.0150 | 1   | .   |                             |        |        |        |         |         |   |
| 5398   | OD2 | OD2 | . ASP ASP ASP B B 281 281 . | 0.3285 | 0.3195 | 0.4717 | -0.0761 | 0.0186  |   |
| 0.0139 | 1   | .   |                             |        |        |        |         |         |   |
| 5399   | C   | C   | . ASP ASP ASP B B 281 281 . | 0.1608 | 0.1786 | 0.1717 | 0.0109  | -0.0107 |   |
| 0.0051 | 1   | .   |                             |        |        |        |         |         |   |
| 5400   | O   | O   | . ASP ASP ASP B B 281 281 . | 0.1791 | 0.1759 | 0.1681 | 0.0188  | 0.0065  |   |
| 0.0036 | 1   | .   |                             |        |        |        |         |         |   |
| 5401   | N   | N   | . PHE PHE PHE B B 282 282 . | 0.1420 | 0.1698 | 0.1324 | 0.0023  | -0.0187 |   |
| 0.0055 | 1   | .   |                             |        |        |        |         |         |   |
| 5402   | CA  | CA  | . PHE PHE PHE B B 282 282 . | 0.1567 | 0.1623 | 0.1546 | 0.0097  | -0.0088 | - |
| 0.0027 | 1   | .   |                             |        |        |        |         |         |   |
| 5403   | CB  | CB  | . PHE PHE PHE B B 282 282 . | 0.1969 | 0.1857 | 0.1738 | 0.0111  | -0.0070 | - |
| 0.0259 | 1   | .   |                             |        |        |        |         |         |   |
| 5404   | CG  | CG  | . PHE PHE PHE B B 282 282 . | 0.2005 | 0.2018 | 0.1811 | 0.0099  | -0.0075 | - |
| 0.0291 | 1   | .   |                             |        |        |        |         |         |   |
| 5405   | CD1 | CD1 | . PHE PHE PHE B B 282 282 . | 0.2675 | 0.1660 | 0.1632 | 0.0408  | -0.0153 |   |
| 0.0087 | 1   | .   |                             |        |        |        |         |         |   |
| 5406   | CE1 | CE1 | . PHE PHE PHE B B 282 282 . | 0.2433 | 0.1834 | 0.1820 | -0.0159 | -0.0089 | - |
| 0.0125 | 1   | .   |                             |        |        |        |         |         |   |
| 5407   | CZ  | CZ  | . PHE PHE PHE B B 282 282 . | 0.2583 | 0.1785 | 0.2397 | 0.0257  | -0.0023 | - |
| 0.0149 | 1   | .   |                             |        |        |        |         |         |   |
| 5408   | CE2 | CE2 | . PHE PHE PHE B B 282 282 . | 0.2466 | 0.1305 | 0.1980 | 0.0306  | -0.0152 |   |
| 0.0063 | 1   | .   |                             |        |        |        |         |         |   |
| 5409   | CD2 | CD2 | . PHE PHE PHE B B 282 282 . | 0.1792 | 0.1773 | 0.1847 | 0.0241  | -0.0494 | - |
| 0.0283 | 1   | .   |                             |        |        |        |         |         |   |
| 5410   | C   | C   | . PHE PHE PHE B B 282 282 . | 0.1793 | 0.1543 | 0.1451 | 0.0136  | -0.0089 | - |
| 0.0008 | 1   | .   |                             |        |        |        |         |         |   |
| 5411   | O   | O   | . PHE PHE PHE B B 282 282 . | 0.1722 | 0.1523 | 0.1258 | 0.0261  | -0.0342 | - |
| 0.0025 | 1   | .   |                             |        |        |        |         |         |   |
| 5412   | N   | N   | . VAL VAL VAL B B 283 283 . | 0.1421 | 0.1435 | 0.1400 | 0.0176  | -0.0040 | - |
| 0.0108 | 1   | .   |                             |        |        |        |         |         |   |
| 5413   | CA  | CA  | . VAL VAL VAL B B 283 283 . | 0.1444 | 0.1510 | 0.1392 | 0.0083  | 0.0217  | - |
| 0.0094 | 1   | .   |                             |        |        |        |         |         |   |
| 5414   | CB  | CB  | . VAL VAL VAL B B 283 283 . | 0.1536 | 0.1544 | 0.1319 | 0.0055  | 0.0053  | - |
| 0.0276 | 1   | .   |                             |        |        |        |         |         |   |
| 5415   | CG1 | CG1 | . VAL VAL VAL B B 283 283 . | 0.1579 | 0.1907 | 0.1399 | -0.0116 | -0.0095 | - |
| 0.0315 | 1   | .   |                             |        |        |        |         |         |   |
| 5416   | CG2 | CG2 | . VAL VAL VAL B B 283 283 . | 0.1496 | 0.1735 | 0.0943 | -0.0096 | 0.0537  |   |
| 0.0079 | 1   | .   |                             |        |        |        |         |         |   |
| 5417   | C   | C   | . VAL VAL VAL B B 283 283 . | 0.1668 | 0.1567 | 0.1349 | 0.0014  | 0.0128  | - |
| 0.0129 | 1   | .   |                             |        |        |        |         |         |   |
| 5418   | O   | O   | . VAL VAL VAL B B 283 283 . | 0.1672 | 0.1255 | 0.1508 | -0.0006 | 0.0215  |   |
| 0.0040 | 1   | .   |                             |        |        |        |         |         |   |
| 5419   | N   | N   | . ARG ARG ARG B B 284 284 . | 0.1654 | 0.1604 | 0.1335 | 0.0020  | 0.0198  | - |
| 0.0097 | 1   | .   |                             |        |        |        |         |         |   |
| 5420   | CA  | CA  | . ARG ARG ARG B B 284 284 . | 0.1462 | 0.1610 | 0.1599 | 0.0167  | 0.0185  | - |
| 0.0030 | 1   | .   |                             |        |        |        |         |         |   |
| 5421   | CB  | CB  | . ARG ARG ARG B B 284 284 . | 0.2009 | 0.1759 | 0.1726 | 0.0310  | 0.0309  |   |
| 0.0127 | 1   | .   |                             |        |        |        |         |         |   |

|        |     |     |                             |        |        |        |         |         |   |
|--------|-----|-----|-----------------------------|--------|--------|--------|---------|---------|---|
| 5422   | CG  | CG  | . ARG ARG ARG B B 284 284 . | 0.1483 | 0.2056 | 0.1771 | 0.0550  | -0.0047 | - |
| 0.0034 | 1   | .   |                             |        |        |        |         |         |   |
| 5423   | CD  | CD  | . ARG ARG ARG B B 284 284 . | 0.2191 | 0.2456 | 0.1941 | 0.0636  | -0.0336 | - |
| 0.0031 | 1   | .   |                             |        |        |        |         |         |   |
| 5424   | NE  | NE  | . ARG ARG ARG B B 284 284 . | 0.2072 | 0.2168 | 0.1927 | 0.0441  | -0.0316 | - |
| 0.0182 | 1   | .   |                             |        |        |        |         |         |   |
| 5425   | CZ  | CZ  | . ARG ARG ARG B B 284 284 . | 0.2221 | 0.2185 | 0.2440 | 0.0374  | -0.0243 | - |
| 0.0080 | 1   | .   |                             |        |        |        |         |         |   |
| 5426   | NH1 | NH1 | . ARG ARG ARG B B 284 284 . | 0.2432 | 0.2217 | 0.2345 | 0.0414  | 0.0341  | - |
| 0.0449 | 1   | .   |                             |        |        |        |         |         |   |
| 5427   | NH2 | NH2 | . ARG ARG ARG B B 284 284 . | 0.3676 | 0.2769 | 0.2364 | 0.0649  | -0.0190 |   |
| 0.0267 | 1   | .   |                             |        |        |        |         |         |   |
| 5428   | C   | C   | . ARG ARG ARG B B 284 284 . | 0.1668 | 0.1523 | 0.1669 | 0.0116  | 0.0129  |   |
| 0.0024 | 1   | .   |                             |        |        |        |         |         |   |
| 5429   | O   | O   | . ARG ARG ARG B B 284 284 . | 0.1736 | 0.1741 | 0.1816 | 0.0060  | 0.0233  | - |
| 0.0282 | 1   | .   |                             |        |        |        |         |         |   |
| 5430   | N   | N   | . ASP ASP ASP B B 285 285 . | 0.1725 | 0.1560 | 0.1450 | 0.0147  | 0.0057  | - |
| 0.0021 | 1   | .   |                             |        |        |        |         |         |   |
| 5431   | CA  | CA  | . ASP ASP ASP B B 285 285 . | 0.1638 | 0.1605 | 0.1623 | 0.0019  | 0.0110  |   |
| 0.0148 | 1   | .   |                             |        |        |        |         |         |   |
| 5432   | CB  | CB  | . ASP ASP ASP B B 285 285 . | 0.2071 | 0.1794 | 0.1708 | 0.0108  | 0.0049  |   |
| 0.0075 | 1   | .   |                             |        |        |        |         |         |   |
| 5433   | CG  | CG  | . ASP ASP ASP B B 285 285 . | 0.2783 | 0.1947 | 0.2130 | -0.0183 | 0.0102  |   |
| 0.0221 | 1   | .   |                             |        |        |        |         |         |   |
| 5434   | OD1 | OD1 | . ASP ASP ASP B B 285 285 . | 0.2904 | 0.1966 | 0.2355 | 0.0127  | 0.0628  |   |
| 0.0335 | 1   | .   |                             |        |        |        |         |         |   |
| 5435   | OD2 | OD2 | . ASP ASP ASP B B 285 285 . | 0.2934 | 0.2472 | 0.2274 | -0.0737 | 0.0117  |   |
| 0.0109 | 1   | .   |                             |        |        |        |         |         |   |
| 5436   | C   | C   | . ASP ASP ASP B B 285 285 . | 0.1735 | 0.1617 | 0.1303 | 0.0172  | -0.0077 |   |
| 0.0007 | 1   | .   |                             |        |        |        |         |         |   |
| 5437   | O   | O   | . ASP ASP ASP B B 285 285 . | 0.1871 | 0.1689 | 0.1559 | 0.0461  | 0.0324  |   |
| 0.0207 | 1   | .   |                             |        |        |        |         |         |   |
| 5438   | N   | N   | . TYR TYR TYR B B 286 286 . | 0.1597 | 0.1244 | 0.1183 | -0.0055 | 0.0154  |   |
| 0.0027 | 1   | .   |                             |        |        |        |         |         |   |
| 5439   | CA  | CA  | . TYR TYR TYR B B 286 286 . | 0.1691 | 0.1441 | 0.1389 | 0.0237  | 0.0072  |   |
| 0.0147 | 1   | .   |                             |        |        |        |         |         |   |
| 5440   | CB  | CB  | . TYR TYR TYR B B 286 286 . | 0.1665 | 0.1121 | 0.1364 | 0.0191  | -0.0083 |   |
| 0.0086 | 1   | .   |                             |        |        |        |         |         |   |
| 5441   | CG  | CG  | . TYR TYR TYR B B 286 286 . | 0.1655 | 0.1773 | 0.1618 | 0.0358  | -0.0208 |   |
| 0.0160 | 1   | .   |                             |        |        |        |         |         |   |
| 5442   | CD1 | CD1 | . TYR TYR TYR B B 286 286 . | 0.2047 | 0.2315 | 0.2376 | 0.0834  | 0.0058  | - |
| 0.0017 | 1   | .   |                             |        |        |        |         |         |   |
| 5443   | CE1 | CE1 | . TYR TYR TYR B B 286 286 . | 0.2961 | 0.2668 | 0.3009 | -0.0048 | -0.0279 |   |
| 0.0199 | 1   | .   |                             |        |        |        |         |         |   |
| 5444   | CZ  | CZ  | . TYR TYR TYR B B 286 286 . | 0.2979 | 0.2990 | 0.3092 | -0.0059 | -0.0341 | - |
| 0.0064 | 1   | .   |                             |        |        |        |         |         |   |
| 5445   | OH  | OH  | . TYR TYR TYR B B 286 286 . | 0.2409 | 0.3960 | 0.3477 | 0.0024  | -0.0028 | - |
| 0.0202 | 1   | .   |                             |        |        |        |         |         |   |
| 5446   | CE2 | CE2 | . TYR TYR TYR B B 286 286 . | 0.2584 | 0.2638 | 0.2263 | 0.0014  | -0.0251 |   |
| 0.0047 | 1   | .   |                             |        |        |        |         |         |   |
| 5447   | CD2 | CD2 | . TYR TYR TYR B B 286 286 . | 0.1736 | 0.1925 | 0.1476 | 0.0154  | -0.0024 |   |
| 0.0046 | 1   | .   |                             |        |        |        |         |         |   |
| 5448   | C   | C   | . TYR TYR TYR B B 286 286 . | 0.1539 | 0.1437 | 0.1399 | 0.0200  | 0.0028  |   |
| 0.0181 | 1   | .   |                             |        |        |        |         |         |   |
| 5449   | O   | O   | . TYR TYR TYR B B 286 286 . | 0.1898 | 0.1492 | 0.1178 | 0.0350  | 0.0193  |   |
| 0.0257 | 1   | .   |                             |        |        |        |         |         |   |
| 5450   | N   | N   | . PRO PRO PRO B B 287 287 . | 0.1621 | 0.1383 | 0.1512 | 0.0392  | -0.0125 |   |
| 0.0255 | 1   | .   |                             |        |        |        |         |         |   |
| 5451   | CA  | CA  | . PRO PRO PRO B B 287 287 . | 0.1575 | 0.1104 | 0.1445 | 0.0202  | 0.0114  |   |
| 0.0257 | 1   | .   |                             |        |        |        |         |         |   |

|        |     |     |                             |        |        |        |         |         |   |
|--------|-----|-----|-----------------------------|--------|--------|--------|---------|---------|---|
| 5452   | CB  | CB  | . PRO PRO PRO B B 287 287 . | 0.1915 | 0.1335 | 0.1416 | 0.0262  | -0.0088 |   |
| 0.0325 | 1   | .   |                             |        |        |        |         |         |   |
| 5453   | CG  | CG  | . PRO PRO PRO B B 287 287 . | 0.2029 | 0.1384 | 0.1737 | 0.0053  | 0.0032  | - |
| 0.0049 | 1   | .   |                             |        |        |        |         |         |   |
| 5454   | CD  | CD  | . PRO PRO PRO B B 287 287 . | 0.1725 | 0.1451 | 0.1487 | 0.0419  | -0.0058 |   |
| 0.0383 | 1   | .   |                             |        |        |        |         |         |   |
| 5455   | C   | C   | . PRO PRO PRO B B 287 287 . | 0.1541 | 0.1394 | 0.1444 | 0.0101  | 0.0012  |   |
| 0.0102 | 1   | .   |                             |        |        |        |         |         |   |
| 5456   | O   | O   | . PRO PRO PRO B B 287 287 . | 0.1579 | 0.1297 | 0.1471 | 0.0093  | 0.0143  | - |
| 0.0052 | 1   | .   |                             |        |        |        |         |         |   |
| 5457   | N   | N   | . VAL VAL VAL B B 288 288 . | 0.1298 | 0.1169 | 0.1297 | 0.0190  | 0.0119  | - |
| 0.0104 | 1   | .   |                             |        |        |        |         |         |   |
| 5458   | CA  | CA  | . VAL VAL VAL B B 288 288 . | 0.1232 | 0.1165 | 0.1324 | 0.0271  | 0.0002  | - |
| 0.0029 | 1   | .   |                             |        |        |        |         |         |   |
| 5459   | CB  | CB  | . VAL VAL VAL B B 288 288 . | 0.1265 | 0.1095 | 0.1179 | 0.0227  | -0.0034 | - |
| 0.0045 | 1   | .   |                             |        |        |        |         |         |   |
| 5460   | CG1 | CG1 | . VAL VAL VAL B B 288 288 . | 0.1436 | 0.1235 | 0.0553 | 0.0412  | 0.0209  | - |
| 0.0106 | 1   | .   |                             |        |        |        |         |         |   |
| 5461   | CG2 | CG2 | . VAL VAL VAL B B 288 288 . | 0.1395 | 0.1210 | 0.1592 | 0.0282  | 0.0278  | - |
| 0.0134 | 1   | .   |                             |        |        |        |         |         |   |
| 5462   | C   | C   | . VAL VAL VAL B B 288 288 . | 0.1420 | 0.1343 | 0.1127 | 0.0216  | 0.0134  |   |
| 0.0049 | 1   | .   |                             |        |        |        |         |         |   |
| 5463   | O   | O   | . VAL VAL VAL B B 288 288 . | 0.1573 | 0.1513 | 0.1098 | 0.0396  | -0.0150 |   |
| 0.0182 | 1   | .   |                             |        |        |        |         |         |   |
| 5464   | N   | N   | . VAL VAL VAL B B 289 289 . | 0.1129 | 0.0815 | 0.1169 | 0.0080  | -0.0060 |   |
| 0.0140 | 1   | .   |                             |        |        |        |         |         |   |
| 5465   | CA  | CA  | . VAL VAL VAL B B 289 289 . | 0.1575 | 0.1141 | 0.1195 | 0.0125  | 0.0025  | - |
| 0.0019 | 1   | .   |                             |        |        |        |         |         |   |
| 5466   | CB  | CB  | . VAL VAL VAL B B 289 289 . | 0.1542 | 0.1326 | 0.1330 | -0.0023 | 0.0280  |   |
| 0.0173 | 1   | .   |                             |        |        |        |         |         |   |
| 5467   | CG1 | CG1 | . VAL VAL VAL B B 289 289 . | 0.1909 | 0.1176 | 0.1402 | 0.0555  | -0.0080 |   |
| 0.0112 | 1   | .   |                             |        |        |        |         |         |   |
| 5468   | CG2 | CG2 | . VAL VAL VAL B B 289 289 . | 0.1747 | 0.1220 | 0.1216 | 0.0316  | 0.0255  | - |
| 0.0061 | 1   | .   |                             |        |        |        |         |         |   |
| 5469   | C   | C   | . VAL VAL VAL B B 289 289 . | 0.1314 | 0.1100 | 0.1062 | 0.0080  | 0.0055  |   |
| 0.0004 | 1   | .   |                             |        |        |        |         |         |   |
| 5470   | O   | O   | . VAL VAL VAL B B 289 289 . | 0.1392 | 0.1110 | 0.1051 | 0.0184  | 0.0087  |   |
| 0.0081 | 1   | .   |                             |        |        |        |         |         |   |
| 5471   | N   | N   | . SER SER SER B B 290 290 . | 0.1349 | 0.1088 | 0.1025 | 0.0135  | 0.0071  | - |
| 0.0057 | 1   | .   |                             |        |        |        |         |         |   |
| 5472   | CA  | CA  | . SER SER SER B B 290 290 . | 0.1185 | 0.0965 | 0.1218 | 0.0109  | -0.0001 | - |
| 0.0164 | 1   | .   |                             |        |        |        |         |         |   |
| 5473   | CB  | CB  | . SER SER SER B B 290 290 . | 0.1255 | 0.1352 | 0.1177 | 0.0072  | 0.0270  | - |
| 0.0055 | 1   | .   |                             |        |        |        |         |         |   |
| 5474   | OG  | OG  | . SER SER SER B B 290 290 . | 0.1616 | 0.1089 | 0.1227 | 0.0148  | 0.0178  |   |
| 0.0083 | 1   | .   |                             |        |        |        |         |         |   |
| 5475   | C   | C   | . SER SER SER B B 290 290 . | 0.1094 | 0.0919 | 0.1259 | 0.0032  | -0.0147 | - |
| 0.0206 | 1   | .   |                             |        |        |        |         |         |   |
| 5476   | O   | O   | . SER SER SER B B 290 290 . | 0.1471 | 0.1231 | 0.1147 | 0.0214  | 0.0102  | - |
| 0.0120 | 1   | .   |                             |        |        |        |         |         |   |
| 5477   | N   | N   | . ILE ILE ILE B B 291 291 . | 0.0968 | 0.0659 | 0.0904 | 0.0041  | -0.0096 | - |
| 0.0161 | 1   | .   |                             |        |        |        |         |         |   |
| 5478   | CA  | CA  | . ILE ILE ILE B B 291 291 . | 0.0896 | 0.0674 | 0.0994 | 0.0018  | -0.0014 | - |
| 0.0144 | 1   | .   |                             |        |        |        |         |         |   |
| 5479   | CB  | CB  | . ILE ILE ILE B B 291 291 . | 0.0797 | 0.0677 | 0.1038 | 0.0080  | 0.0128  | - |
| 0.0129 | 1   | .   |                             |        |        |        |         |         |   |
| 5480   | CG1 | CG1 | . ILE ILE ILE B B 291 291 . | 0.1178 | 0.0757 | 0.0826 | -0.0086 | 0.0091  | - |
| 0.0180 | 1   | .   |                             |        |        |        |         |         |   |
| 5481   | CD1 | CD1 | . ILE ILE ILE B B 291 291 . | 0.1013 | 0.1146 | 0.1145 | -0.0048 | 0.0143  | - |
| 0.0054 | 1   | .   |                             |        |        |        |         |         |   |









|        |     |     |                             |        |        |        |         |         |   |
|--------|-----|-----|-----------------------------|--------|--------|--------|---------|---------|---|
| 5572   | N   | N   | . ALA ALA ALA B B 302 302 . | 0.1279 | 0.0936 | 0.1139 | 0.0088  | -0.0053 |   |
| 0.0029 | 1   | .   |                             |        |        |        |         |         |   |
| 5573   | CA  | CA  | . ALA ALA ALA B B 302 302 . | 0.0930 | 0.0891 | 0.1168 | 0.0010  | -0.0247 |   |
| 0.0051 | 1   | .   |                             |        |        |        |         |         |   |
| 5574   | CB  | CB  | . ALA ALA ALA B B 302 302 . | 0.1031 | 0.0902 | 0.0729 | 0.0198  | -0.0413 | - |
| 0.0009 | 1   | .   |                             |        |        |        |         |         |   |
| 5575   | C   | C   | . ALA ALA ALA B B 302 302 . | 0.1125 | 0.0961 | 0.1355 | 0.0018  | -0.0060 |   |
| 0.0079 | 1   | .   |                             |        |        |        |         |         |   |
| 5576   | O   | O   | . ALA ALA ALA B B 302 302 . | 0.1527 | 0.1026 | 0.1308 | 0.0043  | 0.0063  | - |
| 0.0054 | 1   | .   |                             |        |        |        |         |         |   |
| 5577   | N   | N   | . TRP TRP TRP B B 303 303 . | 0.1213 | 0.0723 | 0.1101 | 0.0086  | 0.0000  |   |
| 0.0027 | 1   | .   |                             |        |        |        |         |         |   |
| 5578   | CA  | CA  | . TRP TRP TRP B B 303 303 . | 0.1221 | 0.1080 | 0.0973 | -0.0053 | -0.0077 |   |
| 0.0051 | 1   | .   |                             |        |        |        |         |         |   |
| 5579   | CB  | CB  | . TRP TRP TRP B B 303 303 . | 0.1251 | 0.1054 | 0.0955 | 0.0110  | 0.0018  |   |
| 0.0064 | 1   | .   |                             |        |        |        |         |         |   |
| 5580   | CG  | CG  | . TRP TRP TRP B B 303 303 . | 0.0824 | 0.0491 | 0.0702 | 0.0140  | 0.0036  | - |
| 0.0021 | 1   | .   |                             |        |        |        |         |         |   |
| 5581   | CD1 | CD1 | . TRP TRP TRP B B 303 303 . | 0.0658 | 0.0735 | 0.0895 | 0.0165  | -0.0063 |   |
| 0.0078 | 1   | .   |                             |        |        |        |         |         |   |
| 5582   | NE1 | NE1 | . TRP TRP TRP B B 303 303 . | 0.1227 | 0.0818 | 0.0881 | 0.0138  | 0.0169  |   |
| 0.0257 | 1   | .   |                             |        |        |        |         |         |   |
| 5583   | CE2 | CE2 | . TRP TRP TRP B B 303 303 . | 0.0828 | 0.0757 | 0.0985 | -0.0040 | -0.0127 | - |
| 0.0053 | 1   | .   |                             |        |        |        |         |         |   |
| 5584   | CD2 | CD2 | . TRP TRP TRP B B 303 303 . | 0.0989 | 0.0514 | 0.0554 | 0.0093  | -0.0045 |   |
| 0.0136 | 1   | .   |                             |        |        |        |         |         |   |
| 5585   | CE3 | CE3 | . TRP TRP TRP B B 303 303 . | 0.0907 | 0.0654 | 0.1233 | -0.0050 | -0.0117 |   |
| 0.0488 | 1   | .   |                             |        |        |        |         |         |   |
| 5586   | CZ3 | CZ3 | . TRP TRP TRP B B 303 303 . | 0.0971 | 0.0875 | 0.0483 | 0.0021  | -0.0351 |   |
| 0.0179 | 1   | .   |                             |        |        |        |         |         |   |
| 5587   | CH2 | CH2 | . TRP TRP TRP B B 303 303 . | 0.0454 | 0.0682 | 0.0677 | 0.0020  | -0.0165 | - |
| 0.0322 | 1   | .   |                             |        |        |        |         |         |   |
| 5588   | CZ2 | CZ2 | . TRP TRP TRP B B 303 303 . | 0.0885 | 0.0657 | 0.1053 | 0.0046  | 0.0117  | - |
| 0.0058 | 1   | .   |                             |        |        |        |         |         |   |
| 5589   | C   | C   | . TRP TRP TRP B B 303 303 . | 0.1189 | 0.1032 | 0.0876 | 0.0094  | -0.0112 | - |
| 0.0121 | 1   | .   |                             |        |        |        |         |         |   |
| 5590   | O   | O   | . TRP TRP TRP B B 303 303 . | 0.1481 | 0.0993 | 0.1017 | -0.0144 | -0.0027 | - |
| 0.0005 | 1   | .   |                             |        |        |        |         |         |   |
| 5591   | N   | N   | . SER SER SER B B 304 304 . | 0.1440 | 0.1095 | 0.0762 | -0.0008 | -0.0140 | - |
| 0.0027 | 1   | .   |                             |        |        |        |         |         |   |
| 5592   | CA  | CA  | . SER SER SER B B 304 304 . | 0.1297 | 0.1317 | 0.0820 | 0.0198  | 0.0007  | - |
| 0.0045 | 1   | .   |                             |        |        |        |         |         |   |
| 5593   | CB  | CB  | . SER SER SER B B 304 304 . | 0.0969 | 0.1255 | 0.0912 | 0.0284  | 0.0022  | - |
| 0.0070 | 1   | .   |                             |        |        |        |         |         |   |
| 5594   | OG  | OG  | . SER SER SER B B 304 304 . | 0.1228 | 0.1003 | 0.1204 | 0.0240  | 0.0035  |   |
| 0.0081 | 1   | .   |                             |        |        |        |         |         |   |
| 5595   | C   | C   | . SER SER SER B B 304 304 . | 0.1410 | 0.1324 | 0.1220 | 0.0084  | 0.0091  | - |
| 0.0071 | 1   | .   |                             |        |        |        |         |         |   |
| 5596   | O   | O   | . SER SER SER B B 304 304 . | 0.1808 | 0.1211 | 0.0977 | 0.0101  | 0.0158  | - |
| 0.0119 | 1   | .   |                             |        |        |        |         |         |   |
| 5597   | N   | N   | . LYS LYS LYS B B 305 305 . | 0.1424 | 0.1120 | 0.1243 | 0.0116  | 0.0168  |   |
| 0.0076 | 1   | .   |                             |        |        |        |         |         |   |
| 5598   | CA  | CA  | . LYS LYS LYS B B 305 305 . | 0.1384 | 0.1334 | 0.1601 | 0.0021  | 0.0248  |   |
| 0.0135 | 1   | .   |                             |        |        |        |         |         |   |
| 5599   | CB  | CB  | . LYS LYS LYS B B 305 305 . | 0.1714 | 0.1528 | 0.1535 | -0.0043 | 0.0568  |   |
| 0.0012 | 1   | .   |                             |        |        |        |         |         |   |
| 5600   | CG  | CG  | . LYS LYS LYS B B 305 305 . | 0.1577 | 0.2066 | 0.2077 | -0.0317 | 0.0490  |   |
| 0.0300 | 1   | .   |                             |        |        |        |         |         |   |
| 5601   | CD  | CD  | . LYS LYS LYS B B 305 305 . | 0.2336 | 0.2529 | 0.2778 | -0.0800 | 0.0642  | - |
| 0.0323 | 1   | .   |                             |        |        |        |         |         |   |



|        |     |     |                             |        |        |        |         |         |   |
|--------|-----|-----|-----------------------------|--------|--------|--------|---------|---------|---|
| 5632   | CG  | CG  | . ASN ASN ASN B B 309 309 . | 0.3003 | 0.2077 | 0.2250 | -0.0269 | 0.0013  |   |
| 0.0011 | 1   | .   |                             |        |        |        |         |         |   |
| 5633   | OD1 | OD1 | . ASN ASN ASN B B 309 309 . | 0.3536 | 0.3165 | 0.2924 | -0.0429 | -0.0331 |   |
| 0.0177 | 1   | .   |                             |        |        |        |         |         |   |
| 5634   | ND2 | ND2 | . ASN ASN ASN B B 309 309 . | 0.3863 | 0.2537 | 0.2743 | -0.0594 | 0.0528  | - |
| 0.0159 | 1   | .   |                             |        |        |        |         |         |   |
| 5635   | C   | C   | . ASN ASN ASN B B 309 309 . | 0.1346 | 0.1386 | 0.1354 | -0.0045 | -0.0016 | - |
| 0.0017 | 1   | .   |                             |        |        |        |         |         |   |
| 5636   | O   | O   | . ASN ASN ASN B B 309 309 . | 0.1585 | 0.1365 | 0.1695 | 0.0077  | 0.0223  |   |
| 0.0108 | 1   | .   |                             |        |        |        |         |         |   |
| 5637   | N   | N   | . VAL VAL VAL B B 310 310 . | 0.1536 | 0.1257 | 0.1071 | -0.0047 | 0.0016  |   |
| 0.0093 | 1   | .   |                             |        |        |        |         |         |   |
| 5638   | CA  | CA  | . VAL VAL VAL B B 310 310 . | 0.1458 | 0.1308 | 0.1189 | -0.0061 | -0.0107 | - |
| 0.0043 | 1   | .   |                             |        |        |        |         |         |   |
| 5639   | CB  | CB  | . VAL VAL VAL B B 310 310 . | 0.1561 | 0.1446 | 0.1117 | -0.0198 | -0.0005 | - |
| 0.0020 | 1   | .   |                             |        |        |        |         |         |   |
| 5640   | CG1 | CG1 | . VAL VAL VAL B B 310 310 . | 0.2180 | 0.2397 | 0.1786 | -0.0339 | -0.0052 | - |
| 0.0336 | 1   | .   |                             |        |        |        |         |         |   |
| 5641   | CG2 | CG2 | . VAL VAL VAL B B 310 310 . | 0.1739 | 0.0908 | 0.1128 | 0.0180  | -0.0048 | - |
| 0.0032 | 1   | .   |                             |        |        |        |         |         |   |
| 5642   | C   | C   | . VAL VAL VAL B B 310 310 . | 0.1393 | 0.1296 | 0.1026 | -0.0062 | -0.0055 |   |
| 0.0084 | 1   | .   |                             |        |        |        |         |         |   |
| 5643   | O   | O   | . VAL VAL VAL B B 310 310 . | 0.1243 | 0.1239 | 0.1169 | 0.0068  | 0.0144  | - |
| 0.0021 | 1   | .   |                             |        |        |        |         |         |   |
| 5644   | N   | N   | . GLY GLY GLY B B 311 311 . | 0.1458 | 0.1075 | 0.1047 | -0.0078 | -0.0102 | - |
| 0.0037 | 1   | .   |                             |        |        |        |         |         |   |
| 5645   | CA  | CA  | . GLY GLY GLY B B 311 311 . | 0.1365 | 0.1075 | 0.0692 | -0.0230 | 0.0026  |   |
| 0.0138 | 1   | .   |                             |        |        |        |         |         |   |
| 5646   | C   | C   | . GLY GLY GLY B B 311 311 . | 0.1445 | 0.1188 | 0.0998 | -0.0147 | -0.0042 |   |
| 0.0027 | 1   | .   |                             |        |        |        |         |         |   |
| 5647   | O   | O   | . GLY GLY GLY B B 311 311 . | 0.1557 | 0.1367 | 0.0777 | -0.0053 | 0.0013  |   |
| 0.0042 | 1   | .   |                             |        |        |        |         |         |   |
| 5648   | N   | N   | . ILE ILE ILE B B 312 312 . | 0.1343 | 0.1105 | 0.0806 | 0.0088  | 0.0040  | - |
| 0.0069 | 1   | .   |                             |        |        |        |         |         |   |
| 5649   | CA  | CA  | . ILE ILE ILE B B 312 312 . | 0.1233 | 0.1123 | 0.0940 | 0.0071  | -0.0015 | - |
| 0.0025 | 1   | .   |                             |        |        |        |         |         |   |
| 5650   | CB  | CB  | . ILE ILE ILE B B 312 312 . | 0.1120 | 0.1154 | 0.1031 | 0.0132  | -0.0097 | - |
| 0.0020 | 1   | .   |                             |        |        |        |         |         |   |
| 5651   | CG1 | CG1 | . ILE ILE ILE B B 312 312 . | 0.1524 | 0.1089 | 0.0775 | 0.0020  | -0.0129 | - |
| 0.0086 | 1   | .   |                             |        |        |        |         |         |   |
| 5652   | CD1 | CD1 | . ILE ILE ILE B B 312 312 . | 0.1316 | 0.1538 | 0.1162 | -0.0200 | -0.0212 | - |
| 0.0298 | 1   | .   |                             |        |        |        |         |         |   |
| 5653   | CG2 | CG2 | . ILE ILE ILE B B 312 312 . | 0.1078 | 0.1062 | 0.0994 | 0.0271  | 0.0167  | - |
| 0.0024 | 1   | .   |                             |        |        |        |         |         |   |
| 5654   | C   | C   | . ILE ILE ILE B B 312 312 . | 0.1240 | 0.1167 | 0.1022 | 0.0073  | 0.0005  |   |
| 0.0039 | 1   | .   |                             |        |        |        |         |         |   |
| 5655   | O   | O   | . ILE ILE ILE B B 312 312 . | 0.1409 | 0.1340 | 0.1011 | 0.0272  | -0.0091 |   |
| 0.0067 | 1   | .   |                             |        |        |        |         |         |   |
| 5656   | N   | N   | . GLN GLN GLN B B 313 313 . | 0.1058 | 0.0869 | 0.0966 | 0.0066  | 0.0161  |   |
| 0.0301 | 1   | .   |                             |        |        |        |         |         |   |
| 5657   | CA  | CA  | . GLN GLN GLN B B 313 313 . | 0.1091 | 0.0486 | 0.0693 | 0.0052  | 0.0132  |   |
| 0.0266 | 1   | .   |                             |        |        |        |         |         |   |
| 5658   | CB  | CB  | . GLN GLN GLN B B 313 313 . | 0.1026 | 0.0627 | 0.0382 | -0.0047 | 0.0247  |   |
| 0.0120 | 1   | .   |                             |        |        |        |         |         |   |
| 5659   | CG  | CG  | . GLN GLN GLN B B 313 313 . | 0.1258 | 0.1079 | 0.0866 | -0.0257 | 0.0421  |   |
| 0.0222 | 1   | .   |                             |        |        |        |         |         |   |
| 5660   | CD  | CD  | . GLN GLN GLN B B 313 313 . | 0.1337 | 0.0879 | 0.1218 | -0.0160 | 0.0009  |   |
| 0.0270 | 1   | .   |                             |        |        |        |         |         |   |
| 5661   | OE1 | OE1 | . GLN GLN GLN B B 313 313 . | 0.1729 | 0.1567 | 0.1559 | -0.0124 | 0.0234  |   |
| 0.0095 | 1   | .   |                             |        |        |        |         |         |   |



|        |     |     |                             |        |        |        |         |         |   |
|--------|-----|-----|-----------------------------|--------|--------|--------|---------|---------|---|
| 5692   | N   | N   | . ASP ASP ASP B B 318 318 . | 0.1126 | 0.0648 | 0.0534 | 0.0123  | 0.0143  |   |
| 0.0000 | 1   | .   |                             |        |        |        |         |         |   |
| 5693   | CA  | CA  | . ASP ASP ASP B B 318 318 . | 0.0930 | 0.0672 | 0.0786 | 0.0170  | -0.0063 |   |
| 0.0027 | 1   | .   |                             |        |        |        |         |         |   |
| 5694   | CB  | CB  | . ASP ASP ASP B B 318 318 . | 0.0983 | 0.0566 | 0.0846 | 0.0082  | -0.0195 |   |
| 0.0282 | 1   | .   |                             |        |        |        |         |         |   |
| 5695   | CG  | CG  | . ASP ASP ASP B B 318 318 . | 0.0630 | 0.0552 | 0.0377 | 0.0019  | -0.0062 | - |
| 0.0187 | 1   | .   |                             |        |        |        |         |         |   |
| 5696   | OD1 | OD1 | . ASP ASP ASP B B 318 318 . | 0.1179 | 0.1206 | 0.1013 | 0.0051  | -0.0072 | - |
| 0.0103 | 1   | .   |                             |        |        |        |         |         |   |
| 5697   | OD2 | OD2 | . ASP ASP ASP B B 318 318 . | 0.1298 | 0.1292 | 0.1327 | 0.0101  | -0.0207 | - |
| 0.0031 | 1   | .   |                             |        |        |        |         |         |   |
| 5698   | C   | C   | . ASP ASP ASP B B 318 318 . | 0.1148 | 0.1032 | 0.0805 | 0.0115  | 0.0002  |   |
| 0.0005 | 1   | .   |                             |        |        |        |         |         |   |
| 5699   | O   | O   | . ASP ASP ASP B B 318 318 . | 0.1149 | 0.0797 | 0.0665 | 0.0067  | -0.0193 |   |
| 0.0030 | 1   | .   |                             |        |        |        |         |         |   |
| 5700   | N   | N   | . LEU LEU LEU B B 319 319 . | 0.0989 | 0.1072 | 0.0766 | 0.0062  | -0.0149 | - |
| 0.0057 | 1   | .   |                             |        |        |        |         |         |   |
| 5701   | CA  | CA  | . LEU LEU LEU B B 319 319 . | 0.1158 | 0.1132 | 0.0768 | 0.0005  | -0.0162 | - |
| 0.0138 | 1   | .   |                             |        |        |        |         |         |   |
| 5702   | CB  | CB  | . LEU LEU LEU B B 319 319 . | 0.1235 | 0.1372 | 0.0697 | 0.0174  | -0.0146 |   |
| 0.0033 | 1   | .   |                             |        |        |        |         |         |   |
| 5703   | CG  | CG  | . LEU LEU LEU B B 319 319 . | 0.1160 | 0.0702 | 0.0597 | 0.0022  | -0.0445 |   |
| 0.0041 | 1   | .   |                             |        |        |        |         |         |   |
| 5704   | CD1 | CD1 | . LEU LEU LEU B B 319 319 . | 0.1348 | 0.0796 | 0.1077 | -0.0308 | -0.0072 | - |
| 0.0001 | 1   | .   |                             |        |        |        |         |         |   |
| 5705   | CD2 | CD2 | . LEU LEU LEU B B 319 319 . | 0.1401 | 0.0711 | 0.0522 | 0.0384  | 0.0062  |   |
| 0.0083 | 1   | .   |                             |        |        |        |         |         |   |
| 5706   | C   | C   | . LEU LEU LEU B B 319 319 . | 0.1124 | 0.1077 | 0.0894 | 0.0152  | -0.0080 | - |
| 0.0073 | 1   | .   |                             |        |        |        |         |         |   |
| 5707   | O   | O   | . LEU LEU LEU B B 319 319 . | 0.1396 | 0.1092 | 0.0832 | 0.0190  | -0.0199 | - |
| 0.0028 | 1   | .   |                             |        |        |        |         |         |   |
| 5708   | N   | N   | . THR THR THR B B 320 320 . | 0.1039 | 0.1013 | 0.0926 | -0.0091 | -0.0056 |   |
| 0.0096 | 1   | .   |                             |        |        |        |         |         |   |
| 5709   | CA  | CA  | . THR THR THR B B 320 320 . | 0.0992 | 0.0893 | 0.0986 | -0.0027 | 0.0025  | - |
| 0.0008 | 1   | .   |                             |        |        |        |         |         |   |
| 5710   | CB  | CB  | . THR THR THR B B 320 320 . | 0.0987 | 0.0908 | 0.0836 | 0.0172  | -0.0174 | - |
| 0.0095 | 1   | .   |                             |        |        |        |         |         |   |
| 5711   | OG1 | OG1 | . THR THR THR B B 320 320 . | 0.1203 | 0.0879 | 0.1350 | 0.0072  | -0.0093 | - |
| 0.0198 | 1   | .   |                             |        |        |        |         |         |   |
| 5712   | CG2 | CG2 | . THR THR THR B B 320 320 . | 0.1527 | 0.1291 | 0.0673 | -0.0073 | -0.0286 |   |
| 0.0052 | 1   | .   |                             |        |        |        |         |         |   |
| 5713   | C   | C   | . THR THR THR B B 320 320 . | 0.1027 | 0.0920 | 0.1006 | 0.0093  | -0.0026 |   |
| 0.0030 | 1   | .   |                             |        |        |        |         |         |   |
| 5714   | O   | O   | . THR THR THR B B 320 320 . | 0.0797 | 0.0903 | 0.1128 | 0.0200  | 0.0112  |   |
| 0.0092 | 1   | .   |                             |        |        |        |         |         |   |
| 5715   | N   | N   | . VAL VAL VAL B B 321 321 . | 0.1207 | 0.0603 | 0.0898 | 0.0076  | 0.0007  | - |
| 0.0062 | 1   | .   |                             |        |        |        |         |         |   |
| 5716   | CA  | CA  | . VAL VAL VAL B B 321 321 . | 0.1117 | 0.0695 | 0.0964 | 0.0059  | 0.0121  |   |
| 0.0000 | 1   | .   |                             |        |        |        |         |         |   |
| 5717   | CB  | CB  | . VAL VAL VAL B B 321 321 . | 0.1036 | 0.0660 | 0.1096 | 0.0117  | -0.0131 | - |
| 0.0039 | 1   | .   |                             |        |        |        |         |         |   |
| 5718   | CG1 | CG1 | . VAL VAL VAL B B 321 321 . | 0.0996 | 0.0461 | 0.1104 | -0.0201 | 0.0099  | - |
| 0.0084 | 1   | .   |                             |        |        |        |         |         |   |
| 5719   | CG2 | CG2 | . VAL VAL VAL B B 321 321 . | 0.1691 | 0.0945 | 0.1400 | 0.0276  | -0.0147 |   |
| 0.0053 | 1   | .   |                             |        |        |        |         |         |   |
| 5720   | C   | C   | . VAL VAL VAL B B 321 321 . | 0.1149 | 0.0868 | 0.0948 | 0.0090  | -0.0014 |   |
| 0.0037 | 1   | .   |                             |        |        |        |         |         |   |
| 5721   | O   | O   | . VAL VAL VAL B B 321 321 . | 0.0992 | 0.0984 | 0.1116 | 0.0060  | 0.0037  |   |
| 0.0171 | 1   | .   |                             |        |        |        |         |         |   |





|        |     |     |                             |        |        |        |         |         |   |
|--------|-----|-----|-----------------------------|--------|--------|--------|---------|---------|---|
| 5752   | CB  | CB  | . ARG ARG ARG B B 326 326 . | 0.1264 | 0.1026 | 0.1116 | 0.0129  | -0.0157 | - |
| 0.0297 | 1   | .   |                             |        |        |        |         |         |   |
| 5753   | CG  | CG  | . ARG ARG ARG B B 326 326 . | 0.2032 | 0.1825 | 0.1592 | 0.0043  | 0.0314  | - |
| 0.0504 | 1   | .   |                             |        |        |        |         |         |   |
| 5754   | CD  | CD  | . ARG ARG ARG B B 326 326 . | 0.1796 | 0.1659 | 0.2117 | -0.0045 | 0.1162  | - |
| 0.0306 | 1   | .   |                             |        |        |        |         |         |   |
| 5755   | NE  | NE  | . ARG ARG ARG B B 326 326 . | 0.1227 | 0.1333 | 0.1822 | 0.0105  | 0.0168  | - |
| 0.0229 | 1   | .   |                             |        |        |        |         |         |   |
| 5756   | CZ  | CZ  | . ARG ARG ARG B B 326 326 . | 0.1213 | 0.0998 | 0.1611 | 0.0165  | 0.0081  | - |
| 0.0043 | 1   | .   |                             |        |        |        |         |         |   |
| 5757   | NH1 | NH1 | . ARG ARG ARG B B 326 326 . | 0.1610 | 0.1549 | 0.2120 | 0.0354  | -0.0586 |   |
| 0.0240 | 1   | .   |                             |        |        |        |         |         |   |
| 5758   | NH2 | NH2 | . ARG ARG ARG B B 326 326 . | 0.1059 | 0.0966 | 0.1196 | -0.0201 | 0.0310  |   |
| 0.0253 | 1   | .   |                             |        |        |        |         |         |   |
| 5759   | C   | C   | . ARG ARG ARG B B 326 326 . | 0.1186 | 0.1267 | 0.1158 | 0.0038  | -0.0201 |   |
| 0.0078 | 1   | .   |                             |        |        |        |         |         |   |
| 5760   | O   | O   | . ARG ARG ARG B B 326 326 . | 0.1560 | 0.1449 | 0.1164 | -0.0021 | -0.0060 |   |
| 0.0138 | 1   | .   |                             |        |        |        |         |         |   |
| 5761   | N   | N   | . ILE ILE ILE B B 327 327 . | 0.1216 | 0.1163 | 0.0877 | 0.0092  | -0.0282 |   |
| 0.0217 | 1   | .   |                             |        |        |        |         |         |   |
| 5762   | CA  | CA  | . ILE ILE ILE B B 327 327 . | 0.1276 | 0.1225 | 0.0949 | -0.0058 | -0.0154 |   |
| 0.0145 | 1   | .   |                             |        |        |        |         |         |   |
| 5763   | CB  | CB  | . ILE ILE ILE B B 327 327 . | 0.1436 | 0.0940 | 0.0893 | -0.0037 | -0.0308 |   |
| 0.0071 | 1   | .   |                             |        |        |        |         |         |   |
| 5764   | CG1 | CG1 | . ILE ILE ILE B B 327 327 . | 0.1245 | 0.1508 | 0.1144 | -0.0180 | -0.0122 |   |
| 0.0540 | 1   | .   |                             |        |        |        |         |         |   |
| 5765   | CD1 | CD1 | . ILE ILE ILE B B 327 327 . | 0.1615 | 0.1474 | 0.0951 | -0.0326 | 0.0019  |   |
| 0.0421 | 1   | .   |                             |        |        |        |         |         |   |
| 5766   | CG2 | CG2 | . ILE ILE ILE B B 327 327 . | 0.1509 | 0.1077 | 0.0953 | 0.0056  | -0.0172 | - |
| 0.0230 | 1   | .   |                             |        |        |        |         |         |   |
| 5767   | C   | C   | . ILE ILE ILE B B 327 327 . | 0.1351 | 0.1348 | 0.1179 | 0.0006  | -0.0098 |   |
| 0.0108 | 1   | .   |                             |        |        |        |         |         |   |
| 5768   | O   | O   | . ILE ILE ILE B B 327 327 . | 0.1353 | 0.1465 | 0.1033 | -0.0021 | -0.0024 | - |
| 0.0010 | 1   | .   |                             |        |        |        |         |         |   |
| 5769   | N   | N   | . GLU GLU GLU B B 328 328 . | 0.1293 | 0.1490 | 0.1421 | 0.0082  | -0.0117 |   |
| 0.0149 | 1   | .   |                             |        |        |        |         |         |   |
| 5770   | CA  | CA  | . GLU GLU GLU B B 328 328 . | 0.1651 | 0.1676 | 0.1543 | 0.0070  | -0.0061 |   |
| 0.0241 | 1   | .   |                             |        |        |        |         |         |   |
| 5771   | CB  | CB  | . GLU GLU GLU B B 328 328 . | 0.1682 | 0.1984 | 0.2046 | 0.0101  | -0.0049 |   |
| 0.0186 | 1   | .   |                             |        |        |        |         |         |   |
| 5772   | CG  | CG  | . GLU GLU GLU B B 328 328 . | 0.2904 | 0.2776 | 0.2635 | -0.0301 | 0.0070  |   |
| 0.0590 | 1   | .   |                             |        |        |        |         |         |   |
| 5773   | CD  | CD  | . GLU GLU GLU B B 328 328 . | 0.4047 | 0.4458 | 0.4149 | -0.0510 | -0.0318 |   |
| 0.0048 | 1   | .   |                             |        |        |        |         |         |   |
| 5774   | OE1 | OE1 | . GLU GLU GLU B B 328 328 . | 0.4390 | 0.5535 | 0.3985 | -0.0646 | -0.0586 |   |
| 0.0273 | 1   | .   |                             |        |        |        |         |         |   |
| 5775   | OE2 | OE2 | . GLU GLU GLU B B 328 328 . | 0.3880 | 0.4972 | 0.5244 | -0.0568 | -0.0520 |   |
| 0.0157 | 1   | .   |                             |        |        |        |         |         |   |
| 5776   | C   | C   | . GLU GLU GLU B B 328 328 . | 0.1642 | 0.1632 | 0.1649 | 0.0135  | -0.0087 |   |
| 0.0124 | 1   | .   |                             |        |        |        |         |         |   |
| 5777   | O   | O   | . GLU GLU GLU B B 328 328 . | 0.1942 | 0.1695 | 0.1146 | 0.0172  | -0.0092 |   |
| 0.0063 | 1   | .   |                             |        |        |        |         |         |   |
| 5778   | N   | N   | . ARG ARG ARG B B 329 329 . | 0.1630 | 0.1519 | 0.1502 | 0.0135  | -0.0178 |   |
| 0.0199 | 1   | .   |                             |        |        |        |         |         |   |
| 5779   | CA  | CA  | . ARG ARG ARG B B 329 329 . | 0.1646 | 0.1364 | 0.1445 | 0.0091  | -0.0059 |   |
| 0.0198 | 1   | .   |                             |        |        |        |         |         |   |
| 5780   | CB  | CB  | . ARG ARG ARG B B 329 329 . | 0.1791 | 0.1148 | 0.1464 | -0.0093 | -0.0043 |   |
| 0.0276 | 1   | .   |                             |        |        |        |         |         |   |
| 5781   | CG  | CG  | . ARG ARG ARG B B 329 329 . | 0.1587 | 0.1596 | 0.1616 | -0.0151 | 0.0164  |   |
| 0.0141 | 1   | .   |                             |        |        |        |         |         |   |

|        |     |     |                             |        |        |        |         |         |   |
|--------|-----|-----|-----------------------------|--------|--------|--------|---------|---------|---|
| 5782   | CD  | CD  | . ARG ARG ARG B B 329 329 . | 0.2362 | 0.1884 | 0.2048 | -0.0154 | 0.0242  |   |
| 0.0085 | 1   | .   |                             |        |        |        |         |         |   |
| 5783   | NE  | NE  | . ARG ARG ARG B B 329 329 . | 0.1619 | 0.1589 | 0.2310 | 0.0307  | 0.0321  |   |
| 0.0036 | 1   | .   |                             |        |        |        |         |         |   |
| 5784   | CZ  | CZ  | . ARG ARG ARG B B 329 329 . | 0.2138 | 0.2138 | 0.2159 | 0.0209  | 0.0101  |   |
| 0.0277 | 1   | .   |                             |        |        |        |         |         |   |
| 5785   | NH1 | NH1 | . ARG ARG ARG B B 329 329 . | 0.2264 | 0.2081 | 0.2225 | 0.1107  | 0.0139  |   |
| 0.0210 | 1   | .   |                             |        |        |        |         |         |   |
| 5786   | NH2 | NH2 | . ARG ARG ARG B B 329 329 . | 0.1947 | 0.1974 | 0.2216 | 0.0137  | -0.0098 |   |
| 0.0624 | 1   | .   |                             |        |        |        |         |         |   |
| 5787   | C   | C   | . ARG ARG ARG B B 329 329 . | 0.1661 | 0.1517 | 0.1551 | 0.0067  | -0.0030 |   |
| 0.0315 | 1   | .   |                             |        |        |        |         |         |   |
| 5788   | O   | O   | . ARG ARG ARG B B 329 329 . | 0.1760 | 0.1340 | 0.1241 | 0.0160  | -0.0128 |   |
| 0.0204 | 1   | .   |                             |        |        |        |         |         |   |
| 5789   | N   | N   | . ALA ALA ALA B B 330 330 . | 0.1339 | 0.1167 | 0.1400 | 0.0167  | -0.0282 |   |
| 0.0172 | 1   | .   |                             |        |        |        |         |         |   |
| 5790   | CA  | CA  | . ALA ALA ALA B B 330 330 . | 0.1166 | 0.1181 | 0.1031 | 0.0092  | -0.0217 |   |
| 0.0074 | 1   | .   |                             |        |        |        |         |         |   |
| 5791   | CB  | CB  | . ALA ALA ALA B B 330 330 . | 0.1234 | 0.1211 | 0.1060 | 0.0235  | -0.0143 |   |
| 0.0050 | 1   | .   |                             |        |        |        |         |         |   |
| 5792   | C   | C   | . ALA ALA ALA B B 330 330 . | 0.1301 | 0.1214 | 0.1229 | 0.0002  | -0.0030 | - |
| 0.0031 | 1   | .   |                             |        |        |        |         |         |   |
| 5793   | O   | O   | . ALA ALA ALA B B 330 330 . | 0.1463 | 0.1515 | 0.1174 | 0.0093  | -0.0239 | - |
| 0.0164 | 1   | .   |                             |        |        |        |         |         |   |
| 5794   | N   | N   | . VAL VAL VAL B B 331 331 . | 0.1283 | 0.1418 | 0.1079 | -0.0147 | -0.0237 | - |
| 0.0170 | 1   | .   |                             |        |        |        |         |         |   |
| 5795   | CA  | CA  | . VAL VAL VAL B B 331 331 . | 0.1592 | 0.1658 | 0.1417 | -0.0244 | -0.0270 | - |
| 0.0108 | 1   | .   |                             |        |        |        |         |         |   |
| 5796   | CB  | CB  | . VAL VAL VAL B B 331 331 . | 0.1698 | 0.1726 | 0.1303 | -0.0332 | -0.0252 | - |
| 0.0077 | 1   | .   |                             |        |        |        |         |         |   |
| 5797   | CG1 | CG1 | . VAL VAL VAL B B 331 331 . | 0.2048 | 0.2502 | 0.1580 | -0.0232 | -0.0560 | - |
| 0.0425 | 1   | .   |                             |        |        |        |         |         |   |
| 5798   | CG2 | CG2 | . VAL VAL VAL B B 331 331 . | 0.1837 | 0.1701 | 0.1518 | -0.0258 | -0.0055 | - |
| 0.0294 | 1   | .   |                             |        |        |        |         |         |   |
| 5799   | C   | C   | . VAL VAL VAL B B 331 331 . | 0.1502 | 0.1795 | 0.1434 | -0.0174 | -0.0135 | - |
| 0.0087 | 1   | .   |                             |        |        |        |         |         |   |
| 5800   | O   | O   | . VAL VAL VAL B B 331 331 . | 0.2043 | 0.2310 | 0.1669 | -0.0113 | -0.0379 | - |
| 0.0157 | 1   | .   |                             |        |        |        |         |         |   |
| 5801   | N   | N   | . GLU GLU GLU B B 332 332 . | 0.1975 | 0.1915 | 0.1616 | -0.0015 | -0.0089 |   |
| 0.0154 | 1   | .   |                             |        |        |        |         |         |   |
| 5802   | CA  | CA  | . GLU GLU GLU B B 332 332 . | 0.2240 | 0.2245 | 0.1767 | 0.0099  | 0.0038  |   |
| 0.0293 | 1   | .   |                             |        |        |        |         |         |   |
| 5803   | CB  | CB  | . GLU GLU GLU B B 332 332 . | 0.2422 | 0.2425 | 0.2110 | 0.0102  | -0.0028 |   |
| 0.0276 | 1   | .   |                             |        |        |        |         |         |   |
| 5804   | CG  | CG  | . GLU GLU GLU B B 332 332 . | 0.3738 | 0.3363 | 0.3084 | 0.0448  | -0.0015 |   |
| 0.0474 | 1   | .   |                             |        |        |        |         |         |   |
| 5805   | CD  | CD  | . GLU GLU GLU B B 332 332 . | 0.5459 | 0.5058 | 0.4630 | -0.0276 | -0.0203 |   |
| 0.0502 | 1   | .   |                             |        |        |        |         |         |   |
| 5806   | OE1 | OE1 | . GLU GLU GLU B B 332 332 . | 0.6299 | 0.5400 | 0.3992 | 0.0175  | -0.0154 |   |
| 0.1295 | 1   | .   |                             |        |        |        |         |         |   |
| 5807   | OE2 | OE2 | . GLU GLU GLU B B 332 332 . | 0.5987 | 0.6595 | 0.4572 | -0.0023 | 0.0053  |   |
| 0.0766 | 1   | .   |                             |        |        |        |         |         |   |
| 5808   | C   | C   | . GLU GLU GLU B B 332 332 . | 0.2159 | 0.2173 | 0.1699 | 0.0140  | 0.0035  |   |
| 0.0169 | 1   | .   |                             |        |        |        |         |         |   |
| 5809   | O   | O   | . GLU GLU GLU B B 332 332 . | 0.2220 | 0.2556 | 0.1733 | 0.0201  | 0.0255  |   |
| 0.0321 | 1   | .   |                             |        |        |        |         |         |   |
| 5810   | N   | N   | . GLU GLU GLU B B 333 333 . | 0.1733 | 0.1829 | 0.1554 | 0.0136  | 0.0086  |   |
| 0.0253 | 1   | .   |                             |        |        |        |         |         |   |
| 5811   | CA  | CA  | . GLU GLU GLU B B 333 333 . | 0.1844 | 0.1720 | 0.1693 | 0.0029  | 0.0013  |   |
| 0.0067 | 1   | .   |                             |        |        |        |         |         |   |



|        |     |     |                             |        |        |        |         |         |   |
|--------|-----|-----|-----------------------------|--------|--------|--------|---------|---------|---|
| 5842   | CG  | CG  | . ASN ASN ASN B B 337 337 . | 0.1046 | 0.0947 | 0.1182 | -0.0135 | -0.0016 | - |
| 0.0144 | 1   | .   |                             |        |        |        |         |         |   |
| 5843   | OD1 | OD1 | . ASN ASN ASN B B 337 337 . | 0.1465 | 0.1239 | 0.1019 | 0.0033  | 0.0077  | - |
| 0.0140 | 1   | .   |                             |        |        |        |         |         |   |
| 5844   | ND2 | ND2 | . ASN ASN ASN B B 337 337 . | 0.1678 | 0.1061 | 0.1317 | 0.0066  | 0.0584  | - |
| 0.0476 | 1   | .   |                             |        |        |        |         |         |   |
| 5845   | C   | C   | . ASN ASN ASN B B 337 337 . | 0.1391 | 0.1069 | 0.1046 | -0.0003 | -0.0029 | - |
| 0.0051 | 1   | .   |                             |        |        |        |         |         |   |
| 5846   | O   | O   | . ASN ASN ASN B B 337 337 . | 0.1702 | 0.0960 | 0.1122 | -0.0241 | -0.0130 | - |
| 0.0121 | 1   | .   |                             |        |        |        |         |         |   |
| 5847   | N   | N   | . CYS CYS CYS B B 338 338 . | 0.1109 | 0.0813 | 0.0782 | -0.0146 | -0.0005 | - |
| 0.0044 | 1   | .   |                             |        |        |        |         |         |   |
| 5848   | CA  | CA  | . CYS CYS CYS B B 338 338 . | 0.1194 | 0.1072 | 0.0731 | 0.0129  | 0.0009  | - |
| 0.0012 | 1   | .   |                             |        |        |        |         |         |   |
| 5849   | CB  | CB  | . CYS CYS CYS B B 338 338 . | 0.0857 | 0.0783 | 0.0630 | 0.0110  | 0.0005  | - |
| 0.0312 | 1   | .   |                             |        |        |        |         |         |   |
| 5850   | SG  | SG  | . CYS CYS CYS B B 338 338 . | 0.1360 | 0.1297 | 0.1094 | 0.0020  | -0.0139 | - |
| 0.0253 | 1   | .   |                             |        |        |        |         |         |   |
| 5851   | C   | C   | . CYS CYS CYS B B 338 338 . | 0.1230 | 0.1089 | 0.0833 | -0.0031 | 0.0095  | - |
| 0.0025 | 1   | .   |                             |        |        |        |         |         |   |
| 5852   | O   | O   | . CYS CYS CYS B B 338 338 . | 0.1277 | 0.1108 | 0.1000 | -0.0064 | 0.0006  | - |
| 0.0051 | 1   | .   |                             |        |        |        |         |         |   |
| 5853   | N   | N   | . LEU LEU LEU B B 339 339 . | 0.1072 | 0.1064 | 0.0995 | -0.0004 | 0.0014  | - |
| 0.0094 | 1   | .   |                             |        |        |        |         |         |   |
| 5854   | CA  | CA  | . LEU LEU LEU B B 339 339 . | 0.1006 | 0.0889 | 0.0665 | 0.0057  | 0.0049  | - |
| 0.0090 | 1   | .   |                             |        |        |        |         |         |   |
| 5855   | CB  | CB  | . LEU LEU LEU B B 339 339 . | 0.1130 | 0.0897 | 0.1046 | 0.0162  | 0.0064  | - |
| 0.0175 | 1   | .   |                             |        |        |        |         |         |   |
| 5856   | CG  | CG  | . LEU LEU LEU B B 339 339 . | 0.0890 | 0.0907 | 0.0425 | 0.0098  | 0.0255  | - |
| 0.0250 | 1   | .   |                             |        |        |        |         |         |   |
| 5857   | CD1 | CD1 | . LEU LEU LEU B B 339 339 . | 0.1236 | 0.0572 | 0.1191 | 0.0052  | -0.0168 | - |
| 0.0491 | 1   | .   |                             |        |        |        |         |         |   |
| 5858   | CD2 | CD2 | . LEU LEU LEU B B 339 339 . | 0.1047 | 0.1096 | 0.0851 | 0.0306  | 0.0074  | - |
| 0.0308 | 1   | .   |                             |        |        |        |         |         |   |
| 5859   | C   | C   | . LEU LEU LEU B B 339 339 . | 0.1119 | 0.1025 | 0.0831 | -0.0032 | -0.0093 | - |
| 0.0032 | 1   | .   |                             |        |        |        |         |         |   |
| 5860   | O   | O   | . LEU LEU LEU B B 339 339 . | 0.1383 | 0.1150 | 0.0939 | -0.0006 | -0.0130 | - |
| 0.0041 | 1   | .   |                             |        |        |        |         |         |   |
| 5861   | N   | N   | . LEU LEU LEU B B 340 340 . | 0.1154 | 0.0914 | 0.0728 | 0.0018  | -0.0178 | - |
| 0.0173 | 1   | .   |                             |        |        |        |         |         |   |
| 5862   | CA  | CA  | . LEU LEU LEU B B 340 340 . | 0.1197 | 0.0896 | 0.0860 | 0.0071  | -0.0142 | - |
| 0.0230 | 1   | .   |                             |        |        |        |         |         |   |
| 5863   | CB  | CB  | . LEU LEU LEU B B 340 340 . | 0.1193 | 0.0926 | 0.0653 | 0.0040  | -0.0362 | - |
| 0.0249 | 1   | .   |                             |        |        |        |         |         |   |
| 5864   | CG  | CG  | . LEU LEU LEU B B 340 340 . | 0.1223 | 0.0840 | 0.0836 | 0.0535  | -0.0363 | - |
| 0.0085 | 1   | .   |                             |        |        |        |         |         |   |
| 5865   | CD1 | CD1 | . LEU LEU LEU B B 340 340 . | 0.1475 | 0.0915 | 0.1059 | 0.0432  | 0.0220  | - |
| 0.0057 | 1   | .   |                             |        |        |        |         |         |   |
| 5866   | CD2 | CD2 | . LEU LEU LEU B B 340 340 . | 0.0915 | 0.1022 | 0.0971 | -0.0139 | -0.0079 | - |
| 0.0053 | 1   | .   |                             |        |        |        |         |         |   |
| 5867   | C   | C   | . LEU LEU LEU B B 340 340 . | 0.1321 | 0.1085 | 0.1286 | 0.0021  | -0.0079 | - |
| 0.0201 | 1   | .   |                             |        |        |        |         |         |   |
| 5868   | O   | O   | . LEU LEU LEU B B 340 340 . | 0.1566 | 0.1110 | 0.1497 | 0.0205  | -0.0063 | - |
| 0.0162 | 1   | .   |                             |        |        |        |         |         |   |
| 5869   | N   | N   | . LEU LEU LEU B B 341 341 . | 0.1274 | 0.0961 | 0.1069 | 0.0000  | -0.0208 | - |
| 0.0263 | 1   | .   |                             |        |        |        |         |         |   |
| 5870   | CA  | CA  | . LEU LEU LEU B B 341 341 . | 0.1326 | 0.0952 | 0.0952 | 0.0021  | -0.0164 | - |
| 0.0167 | 1   | .   |                             |        |        |        |         |         |   |
| 5871   | CB  | CB  | . LEU LEU LEU B B 341 341 . | 0.1245 | 0.1011 | 0.0911 | -0.0065 | -0.0196 | - |
| 0.0011 | 1   | .   |                             |        |        |        |         |         |   |

|        |     |     |                             |        |        |        |         |         |   |
|--------|-----|-----|-----------------------------|--------|--------|--------|---------|---------|---|
| 5872   | CG  | CG  | . LEU LEU LEU B B 341 341 . | 0.1258 | 0.0890 | 0.1461 | 0.0146  | -0.0168 |   |
| 0.0469 | 1   | .   |                             |        |        |        |         |         |   |
| 5873   | CD1 | CD1 | . LEU LEU LEU B B 341 341 . | 0.2226 | 0.2142 | 0.1887 | -0.0021 | -0.1121 |   |
| 0.0056 | 1   | .   |                             |        |        |        |         |         |   |
| 5874   | CD2 | CD2 | . LEU LEU LEU B B 341 341 . | 0.1315 | 0.1711 | 0.2318 | -0.0337 | -0.0313 |   |
| 0.0083 | 1   | .   |                             |        |        |        |         |         |   |
| 5875   | C   | C   | . LEU LEU LEU B B 341 341 . | 0.1507 | 0.1019 | 0.1049 | 0.0107  | -0.0191 | - |
| 0.0082 | 1   | .   |                             |        |        |        |         |         |   |
| 5876   | O   | O   | . LEU LEU LEU B B 341 341 . | 0.1798 | 0.1084 | 0.0778 | 0.0227  | -0.0335 |   |
| 0.0148 | 1   | .   |                             |        |        |        |         |         |   |
| 5877   | N   | N   | . LYS LYS LYS B B 342 342 . | 0.1463 | 0.0999 | 0.1086 | 0.0015  | -0.0062 | - |
| 0.0154 | 1   | .   |                             |        |        |        |         |         |   |
| 5878   | CA  | CA  | . LYS LYS LYS B B 342 342 . | 0.1383 | 0.1227 | 0.0968 | 0.0073  | -0.0066 |   |
| 0.0118 | 1   | .   |                             |        |        |        |         |         |   |
| 5879   | CB  | CB  | . LYS LYS LYS B B 342 342 . | 0.1095 | 0.1107 | 0.0606 | -0.0095 | -0.0135 |   |
| 0.0136 | 1   | .   |                             |        |        |        |         |         |   |
| 5880   | CG  | CG  | . LYS LYS LYS B B 342 342 . | 0.1788 | 0.1292 | 0.0968 | -0.0002 | 0.0174  |   |
| 0.0552 | 1   | .   |                             |        |        |        |         |         |   |
| 5881   | CD  | CD  | . LYS LYS LYS B B 342 342 . | 0.1288 | 0.1461 | 0.0803 | -0.0141 | -0.0175 | - |
| 0.0097 | 1   | .   |                             |        |        |        |         |         |   |
| 5882   | CE  | CE  | . LYS LYS LYS B B 342 342 . | 0.1579 | 0.1607 | 0.0772 | 0.0033  | 0.0280  | - |
| 0.0332 | 1   | .   |                             |        |        |        |         |         |   |
| 5883   | NZ  | NZ  | . LYS LYS LYS B B 342 342 . | 0.2229 | 0.1495 | 0.1290 | 0.0015  | 0.0183  | - |
| 0.0216 | 1   | .   |                             |        |        |        |         |         |   |
| 5884   | C   | C   | . LYS LYS LYS B B 342 342 . | 0.1376 | 0.1128 | 0.1046 | 0.0080  | 0.0061  | - |
| 0.0069 | 1   | .   |                             |        |        |        |         |         |   |
| 5885   | O   | O   | . LYS LYS LYS B B 342 342 . | 0.1805 | 0.1292 | 0.0995 | 0.0165  | 0.0005  |   |
| 0.0006 | 1   | .   |                             |        |        |        |         |         |   |
| 5886   | N   | N   | . VAL VAL VAL B B 343 343 . | 0.1373 | 0.1132 | 0.0920 | 0.0132  | 0.0063  | - |
| 0.0028 | 1   | .   |                             |        |        |        |         |         |   |
| 5887   | CA  | CA  | . VAL VAL VAL B B 343 343 . | 0.1099 | 0.1166 | 0.1140 | 0.0018  | -0.0105 | - |
| 0.0063 | 1   | .   |                             |        |        |        |         |         |   |
| 5888   | CB  | CB  | . VAL VAL VAL B B 343 343 . | 0.0984 | 0.1250 | 0.1347 | -0.0008 | -0.0395 | - |
| 0.0087 | 1   | .   |                             |        |        |        |         |         |   |
| 5889   | CG1 | CG1 | . VAL VAL VAL B B 343 343 . | 0.1700 | 0.1265 | 0.1778 | -0.0196 | -0.0213 | - |
| 0.0005 | 1   | .   |                             |        |        |        |         |         |   |
| 5890   | CG2 | CG2 | . VAL VAL VAL B B 343 343 . | 0.1858 | 0.1533 | 0.1270 | 0.0499  | -0.0499 |   |
| 0.0205 | 1   | .   |                             |        |        |        |         |         |   |
| 5891   | C   | C   | . VAL VAL VAL B B 343 343 . | 0.1071 | 0.1140 | 0.1226 | -0.0039 | -0.0043 |   |
| 0.0017 | 1   | .   |                             |        |        |        |         |         |   |
| 5892   | O   | O   | . VAL VAL VAL B B 343 343 . | 0.1349 | 0.1167 | 0.1296 | 0.0144  | -0.0260 |   |
| 0.0055 | 1   | .   |                             |        |        |        |         |         |   |
| 5893   | N   | N   | . ASN ASN ASN B B 344 344 . | 0.1118 | 0.1021 | 0.0970 | 0.0091  | -0.0257 |   |
| 0.0112 | 1   | .   |                             |        |        |        |         |         |   |
| 5894   | CA  | CA  | . ASN ASN ASN B B 344 344 . | 0.1148 | 0.0832 | 0.0910 | 0.0047  | -0.0190 |   |
| 0.0155 | 1   | .   |                             |        |        |        |         |         |   |
| 5895   | CB  | CB  | . ASN ASN ASN B B 344 344 . | 0.0995 | 0.1071 | 0.0841 | 0.0006  | 0.0012  |   |
| 0.0175 | 1   | .   |                             |        |        |        |         |         |   |
| 5896   | CG  | CG  | . ASN ASN ASN B B 344 344 . | 0.1136 | 0.0987 | 0.0931 | 0.0010  | -0.0287 |   |
| 0.0274 | 1   | .   |                             |        |        |        |         |         |   |
| 5897   | OD1 | OD1 | . ASN ASN ASN B B 344 344 . | 0.1347 | 0.1476 | 0.1727 | 0.0435  | -0.0181 | - |
| 0.0023 | 1   | .   |                             |        |        |        |         |         |   |
| 5898   | ND2 | ND2 | . ASN ASN ASN B B 344 344 . | 0.1199 | 0.1286 | 0.0932 | 0.0121  | 0.0354  | - |
| 0.0227 | 1   | .   |                             |        |        |        |         |         |   |
| 5899   | C   | C   | . ASN ASN ASN B B 344 344 . | 0.1480 | 0.1097 | 0.1124 | 0.0074  | -0.0131 |   |
| 0.0133 | 1   | .   |                             |        |        |        |         |         |   |
| 5900   | O   | O   | . ASN ASN ASN B B 344 344 . | 0.1589 | 0.1274 | 0.1257 | 0.0147  | -0.0148 |   |
| 0.0092 | 1   | .   |                             |        |        |        |         |         |   |
| 5901   | N   | N   | . GLN GLN GLN B B 345 345 . | 0.1115 | 0.0948 | 0.0869 | 0.0172  | 0.0042  |   |
| 0.0307 | 1   | .   |                             |        |        |        |         |         |   |





|        |     |     |                             |        |        |        |         |         |   |
|--------|-----|-----|-----------------------------|--------|--------|--------|---------|---------|---|
| 5962   | C   | C   | . ILE ILE ILE B B 353 353 . | 0.1242 | 0.1506 | 0.1243 | -0.0135 | -0.0033 |   |
| 0.0102 | 1   | .   |                             |        |        |        |         |         |   |
| 5963   | O   | O   | . ILE ILE ILE B B 353 353 . | 0.1522 | 0.1376 | 0.1216 | -0.0174 | -0.0021 | - |
| 0.0208 | 1   | .   |                             |        |        |        |         |         |   |
| 5964   | N   | N   | . GLN GLN GLN B B 354 354 . | 0.1707 | 0.1184 | 0.1199 | -0.0066 | -0.0136 |   |
| 0.0143 | 1   | .   |                             |        |        |        |         |         |   |
| 5965   | CA  | CA  | . GLN GLN GLN B B 354 354 . | 0.1836 | 0.1663 | 0.1417 | 0.0177  | -0.0159 |   |
| 0.0154 | 1   | .   |                             |        |        |        |         |         |   |
| 5966   | CB  | CB  | . GLN GLN GLN B B 354 354 . | 0.2337 | 0.1929 | 0.1470 | 0.0572  | -0.0290 |   |
| 0.0168 | 1   | .   |                             |        |        |        |         |         |   |
| 5967   | CG  | CG  | . GLN GLN GLN B B 354 354 . | 0.3142 | 0.2833 | 0.2825 | 0.0752  | -0.0272 |   |
| 0.0284 | 1   | .   |                             |        |        |        |         |         |   |
| 5968   | CD  | CD  | . GLN GLN GLN B B 354 354 . | 0.4119 | 0.3625 | 0.3770 | 0.1026  | 0.0091  |   |
| 0.0153 | 1   | .   |                             |        |        |        |         |         |   |
| 5969   | OE1 | OE1 | . GLN GLN GLN B B 354 354 . | 0.3736 | 0.5108 | 0.4078 | 0.1413  | 0.0383  | - |
| 0.0415 | 1   | .   |                             |        |        |        |         |         |   |
| 5970   | NE2 | NE2 | . GLN GLN GLN B B 354 354 . | 0.4060 | 0.4478 | 0.3173 | 0.0919  | -0.0070 |   |
| 0.0959 | 1   | .   |                             |        |        |        |         |         |   |
| 5971   | C   | C   | . GLN GLN GLN B B 354 354 . | 0.1786 | 0.1561 | 0.1454 | 0.0243  | -0.0080 |   |
| 0.0087 | 1   | .   |                             |        |        |        |         |         |   |
| 5972   | O   | O   | . GLN GLN GLN B B 354 354 . | 0.1860 | 0.1661 | 0.1371 | -0.0036 | 0.0185  |   |
| 0.0034 | 1   | .   |                             |        |        |        |         |         |   |
| 5973   | N   | N   | . ALA ALA ALA B B 355 355 . | 0.1151 | 0.1015 | 0.1233 | 0.0124  | -0.0112 | - |
| 0.0072 | 1   | .   |                             |        |        |        |         |         |   |
| 5974   | CA  | CA  | . ALA ALA ALA B B 355 355 . | 0.1297 | 0.1042 | 0.1124 | 0.0072  | -0.0106 | - |
| 0.0025 | 1   | .   |                             |        |        |        |         |         |   |
| 5975   | CB  | CB  | . ALA ALA ALA B B 355 355 . | 0.1404 | 0.1134 | 0.1160 | 0.0102  | -0.0163 |   |
| 0.0145 | 1   | .   |                             |        |        |        |         |         |   |
| 5976   | C   | C   | . ALA ALA ALA B B 355 355 . | 0.1375 | 0.1205 | 0.1287 | -0.0071 | -0.0046 |   |
| 0.0064 | 1   | .   |                             |        |        |        |         |         |   |
| 5977   | O   | O   | . ALA ALA ALA B B 355 355 . | 0.1554 | 0.1331 | 0.1221 | 0.0049  | -0.0382 |   |
| 0.0258 | 1   | .   |                             |        |        |        |         |         |   |
| 5978   | N   | N   | . CYS CYS CYS B B 356 356 . | 0.1666 | 0.1271 | 0.1302 | 0.0017  | -0.0192 |   |
| 0.0213 | 1   | .   |                             |        |        |        |         |         |   |
| 5979   | CA  | CA  | . CYS CYS CYS B B 356 356 . | 0.1740 | 0.1361 | 0.1178 | -0.0005 | -0.0087 |   |
| 0.0034 | 1   | .   |                             |        |        |        |         |         |   |
| 5980   | CB  | CB  | . CYS CYS CYS B B 356 356 . | 0.1850 | 0.1438 | 0.1480 | 0.0038  | -0.0079 | - |
| 0.0009 | 1   | .   |                             |        |        |        |         |         |   |
| 5981   | SG  | SG  | . CYS CYS CYS B B 356 356 . | 0.2125 | 0.1340 | 0.1243 | -0.0095 | -0.0100 |   |
| 0.0012 | 1   | .   |                             |        |        |        |         |         |   |
| 5982   | C   | C   | . CYS CYS CYS B B 356 356 . | 0.1652 | 0.1457 | 0.1401 | -0.0098 | -0.0096 | - |
| 0.0007 | 1   | .   |                             |        |        |        |         |         |   |
| 5983   | O   | O   | . CYS CYS CYS B B 356 356 . | 0.1894 | 0.1403 | 0.1284 | 0.0206  | -0.0108 |   |
| 0.0178 | 1   | .   |                             |        |        |        |         |         |   |
| 5984   | N   | N   | . LYS LYS LYS B B 357 357 . | 0.1802 | 0.1376 | 0.1595 | -0.0046 | -0.0265 |   |
| 0.0067 | 1   | .   |                             |        |        |        |         |         |   |
| 5985   | CA  | CA  | . LYS LYS LYS B B 357 357 . | 0.1811 | 0.1751 | 0.1576 | -0.0127 | -0.0258 |   |
| 0.0211 | 1   | .   |                             |        |        |        |         |         |   |
| 5986   | CB  | CB  | . LYS LYS LYS B B 357 357 . | 0.1811 | 0.2041 | 0.1820 | -0.0201 | -0.0119 |   |
| 0.0382 | 1   | .   |                             |        |        |        |         |         |   |
| 5987   | CG  | CG  | . LYS LYS LYS B B 357 357 . | 0.2388 | 0.2736 | 0.2422 | -0.0372 | -0.0575 |   |
| 0.0411 | 1   | .   |                             |        |        |        |         |         |   |
| 5988   | CD  | CD  | . LYS LYS LYS B B 357 357 . | 0.2953 | 0.4231 | 0.3414 | -0.0953 | -0.0327 |   |
| 0.0284 | 1   | .   |                             |        |        |        |         |         |   |
| 5989   | CE  | CE  | . LYS LYS LYS B B 357 357 . | 0.3848 | 0.5517 | 0.3250 | -0.1114 | -0.0501 |   |
| 0.0387 | 1   | .   |                             |        |        |        |         |         |   |
| 5990   | NZ  | NZ  | . LYS LYS LYS B B 357 357 . | 0.4097 | 0.5750 | 0.3991 | -0.0898 | 0.0293  |   |
| 0.1017 | 1   | .   |                             |        |        |        |         |         |   |
| 5991   | C   | C   | . LYS LYS LYS B B 357 357 . | 0.1844 | 0.1701 | 0.1705 | -0.0111 | -0.0181 |   |
| 0.0051 | 1   | .   |                             |        |        |        |         |         |   |



|        |     |     |                             |        |        |        |         |         |   |
|--------|-----|-----|-----------------------------|--------|--------|--------|---------|---------|---|
| 5992   | O   | O   | . LYS LYS LYS B B 357 357 . | 0.1867 | 0.1751 | 0.1385 | -0.0243 | -0.0256 |   |
| 0.0011 | 1   | .   |                             |        |        |        |         |         |   |
| 5993   | N   | N   | . LEU LEU LEU B B 358 358 . | 0.1810 | 0.1586 | 0.1654 | 0.0134  | -0.0239 |   |
| 0.0065 | 1   | .   |                             |        |        |        |         |         |   |
| 5994   | CA  | CA  | . LEU LEU LEU B B 358 358 . | 0.1714 | 0.1376 | 0.1730 | -0.0029 | -0.0112 |   |
| 0.0052 | 1   | .   |                             |        |        |        |         |         |   |
| 5995   | CB  | CB  | . LEU LEU LEU B B 358 358 . | 0.1854 | 0.1532 | 0.1567 | -0.0007 | -0.0195 | - |
| 0.0079 | 1   | .   |                             |        |        |        |         |         |   |
| 5996   | CG  | CG  | . LEU LEU LEU B B 358 358 . | 0.2144 | 0.1666 | 0.1901 | -0.0026 | -0.0440 |   |
| 0.0018 | 1   | .   |                             |        |        |        |         |         |   |
| 5997   | CD1 | CD1 | . LEU LEU LEU B B 358 358 . | 0.2983 | 0.1987 | 0.2181 | 0.0101  | -0.0640 |   |
| 0.0209 | 1   | .   |                             |        |        |        |         |         |   |
| 5998   | CD2 | CD2 | . LEU LEU LEU B B 358 358 . | 0.2100 | 0.2056 | 0.1859 | 0.0186  | -0.0531 | - |
| 0.0035 | 1   | .   |                             |        |        |        |         |         |   |
| 5999   | C   | C   | . LEU LEU LEU B B 358 358 . | 0.1835 | 0.1487 | 0.1636 | -0.0012 | -0.0144 |   |
| 0.0037 | 1   | .   |                             |        |        |        |         |         |   |
| 6000   | O   | O   | . LEU LEU LEU B B 358 358 . | 0.1965 | 0.1290 | 0.1635 | 0.0108  | -0.0429 |   |
| 0.0010 | 1   | .   |                             |        |        |        |         |         |   |
| 6001   | N   | N   | . ALA ALA ALA B B 359 359 . | 0.1547 | 0.1263 | 0.1344 | -0.0038 | -0.0323 |   |
| 0.0145 | 1   | .   |                             |        |        |        |         |         |   |
| 6002   | CA  | CA  | . ALA ALA ALA B B 359 359 . | 0.1644 | 0.1436 | 0.1454 | -0.0014 | -0.0294 | - |
| 0.0001 | 1   | .   |                             |        |        |        |         |         |   |
| 6003   | CB  | CB  | . ALA ALA ALA B B 359 359 . | 0.1909 | 0.1477 | 0.1651 | 0.0028  | -0.0458 |   |
| 0.0142 | 1   | .   |                             |        |        |        |         |         |   |
| 6004   | C   | C   | . ALA ALA ALA B B 359 359 . | 0.1819 | 0.1428 | 0.1590 | 0.0038  | -0.0108 |   |
| 0.0057 | 1   | .   |                             |        |        |        |         |         |   |
| 6005   | O   | O   | . ALA ALA ALA B B 359 359 . | 0.1892 | 0.1424 | 0.1380 | 0.0130  | -0.0240 | - |
| 0.0112 | 1   | .   |                             |        |        |        |         |         |   |
| 6006   | N   | N   | . GLN GLN GLN B B 360 360 . | 0.1910 | 0.1519 | 0.1498 | -0.0157 | -0.0221 | - |
| 0.0042 | 1   | .   |                             |        |        |        |         |         |   |
| 6007   | CA  | CA  | . GLN GLN GLN B B 360 360 . | 0.1865 | 0.1420 | 0.1431 | -0.0045 | -0.0341 | - |
| 0.0057 | 1   | .   |                             |        |        |        |         |         |   |
| 6008   | CB  | CB  | . GLN GLN GLN B B 360 360 . | 0.2094 | 0.1329 | 0.1276 | 0.0060  | -0.0311 | - |
| 0.0243 | 1   | .   |                             |        |        |        |         |         |   |
| 6009   | CG  | CG  | . GLN GLN GLN B B 360 360 . | 0.1708 | 0.1697 | 0.1138 | -0.0220 | -0.0435 |   |
| 0.0301 | 1   | .   |                             |        |        |        |         |         |   |
| 6010   | CD  | CD  | . GLN GLN GLN B B 360 360 . | 0.2092 | 0.1930 | 0.1696 | -0.0186 | -0.0362 |   |
| 0.0093 | 1   | .   |                             |        |        |        |         |         |   |
| 6011   | OE1 | OE1 | . GLN GLN GLN B B 360 360 . | 0.2232 | 0.2399 | 0.1671 | -0.0296 | -0.0673 |   |
| 0.0306 | 1   | .   |                             |        |        |        |         |         |   |
| 6012   | NE2 | NE2 | . GLN GLN GLN B B 360 360 . | 0.2625 | 0.1820 | 0.1719 | 0.0246  | -0.0451 | - |
| 0.0036 | 1   | .   |                             |        |        |        |         |         |   |
| 6013   | C   | C   | . GLN GLN GLN B B 360 360 . | 0.1974 | 0.1796 | 0.1627 | -0.0072 | -0.0308 | - |
| 0.0022 | 1   | .   |                             |        |        |        |         |         |   |
| 6014   | O   | O   | . GLN GLN GLN B B 360 360 . | 0.2066 | 0.1794 | 0.1621 | -0.0137 | -0.0334 |   |
| 0.0204 | 1   | .   |                             |        |        |        |         |         |   |
| 6015   | N   | N   | . GLU GLU GLU B B 361 361 . | 0.2035 | 0.1838 | 0.1900 | -0.0150 | -0.0382 |   |
| 0.0050 | 1   | .   |                             |        |        |        |         |         |   |
| 6016   | CA  | CA  | . GLU GLU GLU B B 361 361 . | 0.2359 | 0.2265 | 0.1881 | -0.0171 | -0.0321 |   |
| 0.0078 | 1   | .   |                             |        |        |        |         |         |   |
| 6017   | CB  | CB  | . GLU GLU GLU B B 361 361 . | 0.2083 | 0.2730 | 0.2039 | -0.0168 | -0.0201 |   |
| 0.0248 | 1   | .   |                             |        |        |        |         |         |   |
| 6018   | CG  | CG  | . GLU GLU GLU B B 361 361 . | 0.3325 | 0.4285 | 0.3606 | -0.0281 | -0.0119 |   |
| 0.0074 | 1   | .   |                             |        |        |        |         |         |   |
| 6019   | CD  | CD  | . GLU GLU GLU B B 361 361 . | 0.4282 | 0.5072 | 0.5480 | 0.0275  | 0.0054  |   |
| 0.0228 | 1   | .   |                             |        |        |        |         |         |   |
| 6020   | OE1 | OE1 | . GLU GLU GLU B B 361 361 . | 0.4611 | 0.6463 | 0.6400 | 0.0006  | 0.0174  |   |
| 0.0159 | 1   | .   |                             |        |        |        |         |         |   |
| 6021   | OE2 | OE2 | . GLU GLU GLU B B 361 361 . | 0.4014 | 0.5285 | 0.5769 | -0.0053 | -0.0173 |   |
| 0.0549 | 1   | .   |                             |        |        |        |         |         |   |

|        |     |     |                             |        |        |        |         |         |   |
|--------|-----|-----|-----------------------------|--------|--------|--------|---------|---------|---|
| 6022   | C   | C   | . GLU GLU GLU B B 361 361 . | 0.2110 | 0.2121 | 0.1759 | -0.0194 | -0.0349 |   |
| 0.0053 | 1   | .   |                             |        |        |        |         |         |   |
| 6023   | O   | O   | . GLU GLU GLU B B 361 361 . | 0.2395 | 0.2228 | 0.1785 | -0.0429 | -0.0571 |   |
| 0.0046 | 1   | .   |                             |        |        |        |         |         |   |
| 6024   | N   | N   | . ASN ASN ASN B B 362 362 . | 0.2141 | 0.1736 | 0.1519 | -0.0334 | -0.0258 |   |
| 0.0090 | 1   | .   |                             |        |        |        |         |         |   |
| 6025   | CA  | CA  | . ASN ASN ASN B B 362 362 . | 0.2077 | 0.1846 | 0.1542 | -0.0216 | -0.0324 | - |
| 0.0115 | 1   | .   |                             |        |        |        |         |         |   |
| 6026   | CB  | CB  | . ASN ASN ASN B B 362 362 . | 0.2249 | 0.1624 | 0.1666 | -0.0157 | -0.0397 |   |
| 0.0006 | 1   | .   |                             |        |        |        |         |         |   |
| 6027   | CG  | CG  | . ASN ASN ASN B B 362 362 . | 0.2347 | 0.2255 | 0.1626 | -0.0090 | -0.0352 |   |
| 0.0030 | 1   | .   |                             |        |        |        |         |         |   |
| 6028   | OD1 | OD1 | . ASN ASN ASN B B 362 362 . | 0.3014 | 0.1971 | 0.1692 | -0.0206 | -0.0673 |   |
| 0.0597 | 1   | .   |                             |        |        |        |         |         |   |
| 6029   | ND2 | ND2 | . ASN ASN ASN B B 362 362 . | 0.2168 | 0.2378 | 0.1755 | 0.0131  | -0.0566 |   |
| 0.0593 | 1   | .   |                             |        |        |        |         |         |   |
| 6030   | C   | C   | . ASN ASN ASN B B 362 362 . | 0.2073 | 0.1874 | 0.1574 | -0.0256 | -0.0228 | - |
| 0.0071 | 1   | .   |                             |        |        |        |         |         |   |
| 6031   | O   | O   | . ASN ASN ASN B B 362 362 . | 0.2001 | 0.2078 | 0.1357 | -0.0228 | -0.0109 | - |
| 0.0023 | 1   | .   |                             |        |        |        |         |         |   |
| 6032   | N   | N   | . GLY GLY GLY B B 363 363 . | 0.1934 | 0.1956 | 0.1171 | -0.0006 | -0.0470 |   |
| 0.0106 | 1   | .   |                             |        |        |        |         |         |   |
| 6033   | CA  | CA  | . GLY GLY GLY B B 363 363 . | 0.2016 | 0.2061 | 0.1240 | 0.0053  | -0.0169 | - |
| 0.0297 | 1   | .   |                             |        |        |        |         |         |   |
| 6034   | C   | C   | . GLY GLY GLY B B 363 363 . | 0.1923 | 0.2003 | 0.1651 | 0.0204  | -0.0098 | - |
| 0.0291 | 1   | .   |                             |        |        |        |         |         |   |
| 6035   | O   | O   | . GLY GLY GLY B B 363 363 . | 0.2339 | 0.2316 | 0.1910 | 0.0120  | -0.0105 | - |
| 0.0442 | 1   | .   |                             |        |        |        |         |         |   |
| 6036   | N   | N   | . TRP TRP TRP B B 364 364 . | 0.1941 | 0.1395 | 0.1377 | 0.0079  | -0.0335 | - |
| 0.0215 | 1   | .   |                             |        |        |        |         |         |   |
| 6037   | CA  | CA  | . TRP TRP TRP B B 364 364 . | 0.1835 | 0.1302 | 0.1384 | 0.0097  | -0.0264 | - |
| 0.0043 | 1   | .   |                             |        |        |        |         |         |   |
| 6038   | CB  | CB  | . TRP TRP TRP B B 364 364 . | 0.1835 | 0.1001 | 0.1340 | 0.0048  | -0.0204 | - |
| 0.0042 | 1   | .   |                             |        |        |        |         |         |   |
| 6039   | CG  | CG  | . TRP TRP TRP B B 364 364 . | 0.1808 | 0.1274 | 0.1113 | 0.0024  | -0.0313 |   |
| 0.0147 | 1   | .   |                             |        |        |        |         |         |   |
| 6040   | CD1 | CD1 | . TRP TRP TRP B B 364 364 . | 0.1945 | 0.1668 | 0.1734 | -0.0109 | -0.0218 |   |
| 0.0092 | 1   | .   |                             |        |        |        |         |         |   |
| 6041   | NE1 | NE1 | . TRP TRP TRP B B 364 364 . | 0.1700 | 0.1477 | 0.1169 | -0.0264 | -0.0204 | - |
| 0.0016 | 1   | .   |                             |        |        |        |         |         |   |
| 6042   | CE2 | CE2 | . TRP TRP TRP B B 364 364 . | 0.1671 | 0.1517 | 0.1220 | -0.0098 | -0.0191 | - |
| 0.0057 | 1   | .   |                             |        |        |        |         |         |   |
| 6043   | CD2 | CD2 | . TRP TRP TRP B B 364 364 . | 0.1399 | 0.0877 | 0.0961 | 0.0306  | -0.0296 |   |
| 0.0055 | 1   | .   |                             |        |        |        |         |         |   |
| 6044   | CE3 | CE3 | . TRP TRP TRP B B 364 364 . | 0.1293 | 0.1182 | 0.1021 | -0.0159 | -0.0306 | - |
| 0.0353 | 1   | .   |                             |        |        |        |         |         |   |
| 6045   | CZ3 | CZ3 | . TRP TRP TRP B B 364 364 . | 0.0980 | 0.1118 | 0.1573 | 0.0529  | 0.0185  | - |
| 0.0151 | 1   | .   |                             |        |        |        |         |         |   |
| 6046   | CH2 | CH2 | . TRP TRP TRP B B 364 364 . | 0.1571 | 0.0864 | 0.0904 | 0.0151  | -0.0049 | - |
| 0.0206 | 1   | .   |                             |        |        |        |         |         |   |
| 6047   | CZ2 | CZ2 | . TRP TRP TRP B B 364 364 . | 0.1808 | 0.1578 | 0.1402 | 0.0206  | -0.0224 | - |
| 0.0271 | 1   | .   |                             |        |        |        |         |         |   |
| 6048   | C   | C   | . TRP TRP TRP B B 364 364 . | 0.1765 | 0.1262 | 0.1293 | -0.0084 | -0.0172 | - |
| 0.0127 | 1   | .   |                             |        |        |        |         |         |   |
| 6049   | O   | O   | . TRP TRP TRP B B 364 364 . | 0.1909 | 0.1397 | 0.1141 | -0.0201 | -0.0197 | - |
| 0.0113 | 1   | .   |                             |        |        |        |         |         |   |
| 6050   | N   | N   | . GLY GLY GLY B B 365 365 . | 0.1857 | 0.1258 | 0.1489 | 0.0230  | -0.0112 |   |
| 0.0051 | 1   | .   |                             |        |        |        |         |         |   |
| 6051   | CA  | CA  | . GLY GLY GLY B B 365 365 . | 0.1776 | 0.1332 | 0.1050 | 0.0184  | -0.0205 | - |
| 0.0071 | 1   | .   |                             |        |        |        |         |         |   |

|        |     |     |                             |        |        |        |         |         |   |
|--------|-----|-----|-----------------------------|--------|--------|--------|---------|---------|---|
| 6052   | C   | C   | . GLY GLY GLY B B 365 365 . | 0.1409 | 0.1150 | 0.0902 | 0.0078  | -0.0106 | - |
| 0.0061 | 1   | .   |                             |        |        |        |         |         |   |
| 6053   | O   | O   | . GLY GLY GLY B B 365 365 . | 0.1578 | 0.1222 | 0.0764 | -0.0119 | -0.0359 |   |
| 0.0012 | 1   | .   |                             |        |        |        |         |         |   |
| 6054   | N   | N   | . VAL VAL VAL B B 366 366 . | 0.1401 | 0.1133 | 0.0910 | 0.0005  | -0.0342 | - |
| 0.0115 | 1   | .   |                             |        |        |        |         |         |   |
| 6055   | CA  | CA  | . VAL VAL VAL B B 366 366 . | 0.1285 | 0.0991 | 0.0983 | 0.0222  | -0.0213 | - |
| 0.0005 | 1   | .   |                             |        |        |        |         |         |   |
| 6056   | CB  | CB  | . VAL VAL VAL B B 366 366 . | 0.1416 | 0.1123 | 0.1024 | 0.0136  | -0.0241 |   |
| 0.0026 | 1   | .   |                             |        |        |        |         |         |   |
| 6057   | CG1 | CG1 | . VAL VAL VAL B B 366 366 . | 0.1899 | 0.1415 | 0.0839 | 0.0111  | 0.0046  |   |
| 0.0033 | 1   | .   |                             |        |        |        |         |         |   |
| 6058   | CG2 | CG2 | . VAL VAL VAL B B 366 366 . | 0.1389 | 0.1431 | 0.1683 | 0.0230  | -0.0358 |   |
| 0.0049 | 1   | .   |                             |        |        |        |         |         |   |
| 6059   | C   | C   | . VAL VAL VAL B B 366 366 . | 0.1332 | 0.1239 | 0.1105 | 0.0067  | -0.0265 |   |
| 0.0015 | 1   | .   |                             |        |        |        |         |         |   |
| 6060   | O   | O   | . VAL VAL VAL B B 366 366 . | 0.1365 | 0.1095 | 0.1155 | 0.0076  | -0.0343 | - |
| 0.0090 | 1   | .   |                             |        |        |        |         |         |   |
| 6061   | N   | N   | . MET MET MET B B 367 367 . | 0.1101 | 0.1159 | 0.0843 | 0.0115  | -0.0184 | - |
| 0.0099 | 1   | .   |                             |        |        |        |         |         |   |
| 6062   | CA  | CA  | . MET MET MET B B 367 367 . | 0.1120 | 0.0948 | 0.0855 | 0.0082  | -0.0132 | - |
| 0.0091 | 1   | .   |                             |        |        |        |         |         |   |
| 6063   | CB  | CB  | . MET MET MET B B 367 367 . | 0.0885 | 0.1127 | 0.0922 | 0.0215  | -0.0132 | - |
| 0.0069 | 1   | .   |                             |        |        |        |         |         |   |
| 6064   | CG  | CG  | . MET MET MET B B 367 367 . | 0.1244 | 0.1061 | 0.0481 | 0.0338  | -0.0167 |   |
| 0.0002 | 1   | .   |                             |        |        |        |         |         |   |
| 6065   | SD  | SD  | . MET MET MET B B 367 367 . | 0.1628 | 0.1183 | 0.1256 | 0.0179  | -0.0003 | - |
| 0.0081 | 1   | .   |                             |        |        |        |         |         |   |
| 6066   | CE  | CE  | . MET MET MET B B 367 367 . | 0.1633 | 0.1811 | 0.1433 | 0.0205  | 0.0084  | - |
| 0.0577 | 1   | .   |                             |        |        |        |         |         |   |
| 6067   | C   | C   | . MET MET MET B B 367 367 . | 0.1097 | 0.1058 | 0.0987 | 0.0066  | -0.0024 |   |
| 0.0072 | 1   | .   |                             |        |        |        |         |         |   |
| 6068   | O   | O   | . MET MET MET B B 367 367 . | 0.1146 | 0.0792 | 0.1092 | -0.0034 | -0.0032 | - |
| 0.0013 | 1   | .   |                             |        |        |        |         |         |   |
| 6069   | N   | N   | . VAL VAL VAL B B 368 368 . | 0.1052 | 0.1048 | 0.0653 | -0.0008 | 0.0084  | - |
| 0.0040 | 1   | .   |                             |        |        |        |         |         |   |
| 6070   | CA  | CA  | . VAL VAL VAL B B 368 368 . | 0.1178 | 0.1039 | 0.0799 | 0.0018  | 0.0060  | - |
| 0.0004 | 1   | .   |                             |        |        |        |         |         |   |
| 6071   | CB  | CB  | . VAL VAL VAL B B 368 368 . | 0.1305 | 0.1224 | 0.0904 | -0.0029 | 0.0105  |   |
| 0.0004 | 1   | .   |                             |        |        |        |         |         |   |
| 6072   | CG1 | CG1 | . VAL VAL VAL B B 368 368 . | 0.0943 | 0.1443 | 0.0409 | -0.0070 | 0.0326  |   |
| 0.0005 | 1   | .   |                             |        |        |        |         |         |   |
| 6073   | CG2 | CG2 | . VAL VAL VAL B B 368 368 . | 0.1318 | 0.1304 | 0.1233 | -0.0020 | -0.0087 | - |
| 0.0162 | 1   | .   |                             |        |        |        |         |         |   |
| 6074   | C   | C   | . VAL VAL VAL B B 368 368 . | 0.1109 | 0.1075 | 0.0593 | 0.0088  | 0.0008  | - |
| 0.0047 | 1   | .   |                             |        |        |        |         |         |   |
| 6075   | O   | O   | . VAL VAL VAL B B 368 368 . | 0.1159 | 0.1001 | 0.0808 | 0.0099  | -0.0188 | - |
| 0.0011 | 1   | .   |                             |        |        |        |         |         |   |
| 6076   | N   | N   | . SER SER SER B B 369 369 . | 0.1146 | 0.0611 | 0.0866 | 0.0015  | -0.0238 |   |
| 0.0106 | 1   | .   |                             |        |        |        |         |         |   |
| 6077   | CA  | CA  | . SER SER SER B B 369 369 . | 0.1094 | 0.1102 | 0.0891 | -0.0101 | -0.0118 | - |
| 0.0003 | 1   | .   |                             |        |        |        |         |         |   |
| 6078   | CB  | CB  | . SER SER SER B B 369 369 . | 0.1005 | 0.1034 | 0.0822 | -0.0123 | -0.0152 |   |
| 0.0095 | 1   | .   |                             |        |        |        |         |         |   |
| 6079   | OG  | OG  | . SER SER SER B B 369 369 . | 0.1046 | 0.0990 | 0.0863 | -0.0133 | -0.0225 |   |
| 0.0183 | 1   | .   |                             |        |        |        |         |         |   |
| 6080   | C   | C   | . SER SER SER B B 369 369 . | 0.0931 | 0.0940 | 0.0741 | 0.0110  | -0.0029 |   |
| 0.0099 | 1   | .   |                             |        |        |        |         |         |   |
| 6081   | O   | O   | . SER SER SER B B 369 369 . | 0.1074 | 0.1158 | 0.0823 | 0.0207  | -0.0009 |   |
| 0.0128 | 1   | .   |                             |        |        |        |         |         |   |

|        |     |     |                             |        |        |        |         |         |   |
|--------|-----|-----|-----------------------------|--------|--------|--------|---------|---------|---|
| 6082   | N   | N   | . HIS HIS HIS B B 370 370 . | 0.1148 | 0.0966 | 0.0694 | 0.0242  | -0.0003 | - |
| 0.0089 | 1   | .   |                             |        |        |        |         |         |   |
| 6083   | CA  | CA  | . HIS HIS HIS B B 370 370 . | 0.1110 | 0.0767 | 0.0779 | 0.0205  | -0.0087 | - |
| 0.0092 | 1   | .   |                             |        |        |        |         |         |   |
| 6084   | CB  | CB  | . HIS HIS HIS B B 370 370 . | 0.1184 | 0.0743 | 0.0632 | 0.0085  | -0.0075 | - |
| 0.0004 | 1   | .   |                             |        |        |        |         |         |   |
| 6085   | CG  | CG  | . HIS HIS HIS B B 370 370 . | 0.1005 | 0.0493 | 0.0743 | 0.0293  | -0.0109 | - |
| 0.0164 | 1   | .   |                             |        |        |        |         |         |   |
| 6086   | ND1 | ND1 | . HIS HIS HIS B B 370 370 . | 0.1213 | 0.1039 | 0.0497 | 0.0024  | -0.0171 | - |
| 0.0196 | 1   | .   |                             |        |        |        |         |         |   |
| 6087   | CE1 | CE1 | . HIS HIS HIS B B 370 370 . | 0.1658 | 0.1572 | 0.1299 | 0.0463  | 0.0204  | - |
| 0.0153 | 1   | .   |                             |        |        |        |         |         |   |
| 6088   | NE2 | NE2 | . HIS HIS HIS B B 370 370 . | 0.1352 | 0.1110 | 0.1015 | 0.0480  | 0.0034  |   |
| 0.0166 | 1   | .   |                             |        |        |        |         |         |   |
| 6089   | CD2 | CD2 | . HIS HIS HIS B B 370 370 . | 0.1296 | 0.1326 | 0.1088 | 0.0074  | 0.0223  | - |
| 0.0068 | 1   | .   |                             |        |        |        |         |         |   |
| 6090   | C   | C   | . HIS HIS HIS B B 370 370 . | 0.1292 | 0.0866 | 0.0987 | 0.0136  | 0.0064  | - |
| 0.0011 | 1   | .   |                             |        |        |        |         |         |   |
| 6091   | O   | O   | . HIS HIS HIS B B 370 370 . | 0.1276 | 0.1003 | 0.0994 | 0.0286  | -0.0046 |   |
| 0.0096 | 1   | .   |                             |        |        |        |         |         |   |
| 6092   | N   | N   | . ARG ARG ARG B B 371 371 . | 0.1224 | 0.0835 | 0.0743 | 0.0177  | -0.0081 |   |
| 0.0024 | 1   | .   |                             |        |        |        |         |         |   |
| 6093   | CA  | CA  | . ARG ARG ARG B B 371 371 . | 0.0828 | 0.0912 | 0.0945 | 0.0145  | -0.0031 |   |
| 0.0087 | 1   | .   |                             |        |        |        |         |         |   |
| 6094   | CB  | CB  | . ARG ARG ARG B B 371 371 . | 0.0743 | 0.0759 | 0.0540 | 0.0351  | 0.0002  |   |
| 0.0133 | 1   | .   |                             |        |        |        |         |         |   |
| 6095   | CG  | CG  | . ARG ARG ARG B B 371 371 . | 0.0914 | 0.1018 | 0.0489 | 0.0063  | -0.0266 |   |
| 0.0286 | 1   | .   |                             |        |        |        |         |         |   |
| 6096   | CD  | CD  | . ARG ARG ARG B B 371 371 . | 0.0860 | 0.0677 | 0.0629 | -0.0061 | -0.0111 |   |
| 0.0289 | 1   | .   |                             |        |        |        |         |         |   |
| 6097   | NE  | NE  | . ARG ARG ARG B B 371 371 . | 0.1750 | 0.1002 | 0.0898 | -0.0066 | -0.0142 |   |
| 0.0348 | 1   | .   |                             |        |        |        |         |         |   |
| 6098   | CZ  | CZ  | . ARG ARG ARG B B 371 371 . | 0.0722 | 0.0758 | 0.1185 | 0.0264  | -0.0057 |   |
| 0.0141 | 1   | .   |                             |        |        |        |         |         |   |
| 6099   | NH1 | NH1 | . ARG ARG ARG B B 371 371 . | 0.0928 | 0.0649 | 0.0817 | 0.0167  | -0.0064 | - |
| 0.0030 | 1   | .   |                             |        |        |        |         |         |   |
| 6100   | NH2 | NH2 | . ARG ARG ARG B B 371 371 . | 0.1424 | 0.0591 | 0.0795 | 0.0190  | -0.0098 |   |
| 0.0284 | 1   | .   |                             |        |        |        |         |         |   |
| 6101   | C   | C   | . ARG ARG ARG B B 371 371 . | 0.0919 | 0.1017 | 0.0834 | 0.0105  | -0.0080 |   |
| 0.0075 | 1   | .   |                             |        |        |        |         |         |   |
| 6102   | O   | O   | . ARG ARG ARG B B 371 371 . | 0.1164 | 0.0936 | 0.0943 | 0.0104  | -0.0086 |   |
| 0.0110 | 1   | .   |                             |        |        |        |         |         |   |
| 6103   | N   | N   | . SER SER SER B B 372 372 . | 0.0872 | 0.0809 | 0.0737 | 0.0065  | -0.0170 | - |
| 0.0145 | 1   | .   |                             |        |        |        |         |         |   |
| 6104   | CA  | CA  | . SER SER SER B B 372 372 . | 0.1040 | 0.1009 | 0.1012 | 0.0259  | -0.0146 | - |
| 0.0030 | 1   | .   |                             |        |        |        |         |         |   |
| 6105   | CB  | CB  | . SER SER SER B B 372 372 . | 0.1016 | 0.1056 | 0.0778 | 0.0271  | -0.0209 |   |
| 0.0102 | 1   | .   |                             |        |        |        |         |         |   |
| 6106   | OG  | OG  | . SER SER SER B B 372 372 . | 0.1053 | 0.0989 | 0.1292 | 0.0071  | -0.0245 | - |
| 0.0172 | 1   | .   |                             |        |        |        |         |         |   |
| 6107   | C   | C   | . SER SER SER B B 372 372 . | 0.1123 | 0.0939 | 0.0871 | 0.0229  | -0.0053 | - |
| 0.0062 | 1   | .   |                             |        |        |        |         |         |   |
| 6108   | O   | O   | . SER SER SER B B 372 372 . | 0.1323 | 0.0998 | 0.1072 | 0.0183  | -0.0124 | - |
| 0.0103 | 1   | .   |                             |        |        |        |         |         |   |
| 6109   | N   | N   | . GLY GLY GLY B B 373 373 . | 0.1220 | 0.1289 | 0.1014 | 0.0099  | 0.0053  |   |
| 0.0061 | 1   | .   |                             |        |        |        |         |         |   |
| 6110   | CA  | CA  | . GLY GLY GLY B B 373 373 . | 0.1459 | 0.0995 | 0.0968 | -0.0030 | 0.0072  | - |
| 0.0133 | 1   | .   |                             |        |        |        |         |         |   |
| 6111   | C   | C   | . GLY GLY GLY B B 373 373 . | 0.1160 | 0.1035 | 0.1186 | 0.0103  | -0.0099 | - |
| 0.0084 | 1   | .   |                             |        |        |        |         |         |   |

|        |     |     |                             |        |        |        |         |         |   |
|--------|-----|-----|-----------------------------|--------|--------|--------|---------|---------|---|
| 6112   | O   | O   | . GLY GLY GLY B B 373 373 . | 0.1174 | 0.0985 | 0.1300 | 0.0130  | -0.0170 | - |
| 0.0140 | 1   | .   |                             |        |        |        |         |         |   |
| 6113   | N   | N   | . GLU GLU GLU B B 374 374 . | 0.1189 | 0.0877 | 0.1054 | 0.0040  | -0.0045 | - |
| 0.0117 | 1   | .   |                             |        |        |        |         |         |   |
| 6114   | CA  | CA  | . GLU GLU GLU B B 374 374 . | 0.0832 | 0.0839 | 0.0790 | 0.0003  | 0.0033  | - |
| 0.0087 | 1   | .   |                             |        |        |        |         |         |   |
| 6115   | CB  | CB  | . GLU GLU GLU B B 374 374 . | 0.0979 | 0.1004 | 0.0635 | 0.0157  | -0.0004 | - |
| 0.0108 | 1   | .   |                             |        |        |        |         |         |   |
| 6116   | CG  | CG  | . GLU GLU GLU B B 374 374 . | 0.1094 | 0.0860 | 0.0510 | 0.0185  | -0.0166 | - |
| 0.0002 | 1   | .   |                             |        |        |        |         |         |   |
| 6117   | CD  | CD  | . GLU GLU GLU B B 374 374 . | 0.1380 | 0.1189 | 0.0989 | 0.0121  | -0.0090 | - |
| 0.0078 | 1   | .   |                             |        |        |        |         |         |   |
| 6118   | OE1 | OE1 | . GLU GLU GLU B B 374 374 . | 0.0956 | 0.1143 | 0.0941 | -0.0064 | -0.0033 | - |
| 0.0068 | 1   | .   |                             |        |        |        |         |         |   |
| 6119   | OE2 | OE2 | . GLU GLU GLU B B 374 374 . | 0.1635 | 0.1303 | 0.0980 | 0.0439  | -0.0133 | - |
| 0.0115 | 1   | .   |                             |        |        |        |         |         |   |
| 6120   | C   | C   | . GLU GLU GLU B B 374 374 . | 0.0966 | 0.0856 | 0.0775 | -0.0083 | -0.0037 | - |
| 0.0055 | 1   | .   |                             |        |        |        |         |         |   |
| 6121   | O   | O   | . GLU GLU GLU B B 374 374 . | 0.1065 | 0.0820 | 0.0834 | -0.0101 | 0.0074  | - |
| 0.0080 | 1   | .   |                             |        |        |        |         |         |   |
| 6122   | N   | N   | . THR THR THR B B 375 375 . | 0.0896 | 0.0931 | 0.0896 | -0.0008 | 0.0137  | - |
| 0.0029 | 1   | .   |                             |        |        |        |         |         |   |
| 6123   | CA  | CA  | . THR THR THR B B 375 375 . | 0.1041 | 0.0744 | 0.1012 | 0.0032  | 0.0014  | - |
| 0.0032 | 1   | .   |                             |        |        |        |         |         |   |
| 6124   | CB  | CB  | . THR THR THR B B 375 375 . | 0.0918 | 0.0652 | 0.0880 | 0.0137  | -0.0168 | - |
| 0.0042 | 1   | .   |                             |        |        |        |         |         |   |
| 6125   | OG1 | OG1 | . THR THR THR B B 375 375 . | 0.0946 | 0.0818 | 0.1119 | -0.0001 | -0.0145 | - |
| 0.0105 | 1   | .   |                             |        |        |        |         |         |   |
| 6126   | CG2 | CG2 | . THR THR THR B B 375 375 . | 0.1214 | 0.0769 | 0.1053 | 0.0007  | 0.0159  | - |
| 0.0058 | 1   | .   |                             |        |        |        |         |         |   |
| 6127   | C   | C   | . THR THR THR B B 375 375 . | 0.1124 | 0.0907 | 0.1031 | 0.0084  | -0.0088 | - |
| 0.0049 | 1   | .   |                             |        |        |        |         |         |   |
| 6128   | O   | O   | . THR THR THR B B 375 375 . | 0.1286 | 0.1050 | 0.1226 | 0.0232  | 0.0069  | - |
| 0.0097 | 1   | .   |                             |        |        |        |         |         |   |
| 6129   | N   | N   | . GLU GLU GLU B B 376 376 . | 0.1019 | 0.0940 | 0.1063 | 0.0028  | -0.0224 | - |
| 0.0174 | 1   | .   |                             |        |        |        |         |         |   |
| 6130   | CA  | CA  | . GLU GLU GLU B B 376 376 . | 0.1243 | 0.1034 | 0.1029 | -0.0098 | -0.0250 | - |
| 0.0243 | 1   | .   |                             |        |        |        |         |         |   |
| 6131   | CB  | CB  | . GLU GLU GLU B B 376 376 . | 0.1274 | 0.1254 | 0.1016 | -0.0017 | -0.0026 | - |
| 0.0483 | 1   | .   |                             |        |        |        |         |         |   |
| 6132   | CG  | CG  | . GLU GLU GLU B B 376 376 . | 0.1336 | 0.1530 | 0.1141 | -0.0312 | 0.0136  | - |
| 0.0009 | 1   | .   |                             |        |        |        |         |         |   |
| 6133   | CD  | CD  | . GLU GLU GLU B B 376 376 . | 0.1801 | 0.1245 | 0.1292 | -0.0125 | 0.0163  | - |
| 0.0096 | 1   | .   |                             |        |        |        |         |         |   |
| 6134   | OE1 | OE1 | . GLU GLU GLU B B 376 376 . | 0.1884 | 0.1483 | 0.1182 | -0.0320 | 0.0208  | - |
| 0.0407 | 1   | .   |                             |        |        |        |         |         |   |
| 6135   | OE2 | OE2 | . GLU GLU GLU B B 376 376 . | 0.1426 | 0.1339 | 0.1389 | 0.0020  | 0.0274  | - |
| 0.0008 | 1   | .   |                             |        |        |        |         |         |   |
| 6136   | C   | C   | . GLU GLU GLU B B 376 376 . | 0.1472 | 0.1164 | 0.1112 | -0.0065 | -0.0289 | - |
| 0.0062 | 1   | .   |                             |        |        |        |         |         |   |
| 6137   | O   | O   | . GLU GLU GLU B B 376 376 . | 0.1919 | 0.1407 | 0.1337 | -0.0182 | -0.0442 | - |
| 0.0166 | 1   | .   |                             |        |        |        |         |         |   |
| 6138   | N   | N   | . ASP ASP ASP B B 377 377 . | 0.1108 | 0.1306 | 0.0989 | 0.0008  | -0.0241 | - |
| 0.0123 | 1   | .   |                             |        |        |        |         |         |   |
| 6139   | CA  | CA  | . ASP ASP ASP B B 377 377 . | 0.1267 | 0.1372 | 0.1239 | 0.0085  | -0.0160 | - |
| 0.0067 | 1   | .   |                             |        |        |        |         |         |   |
| 6140   | CB  | CB  | . ASP ASP ASP B B 377 377 . | 0.1095 | 0.1392 | 0.1540 | 0.0259  | -0.0121 | - |
| 0.0097 | 1   | .   |                             |        |        |        |         |         |   |
| 6141   | CG  | CG  | . ASP ASP ASP B B 377 377 . | 0.1678 | 0.1643 | 0.1543 | 0.0068  | -0.0172 | - |
| 0.0062 | 1   | .   |                             |        |        |        |         |         |   |



|        |     |     |                   |         |                                          |
|--------|-----|-----|-------------------|---------|------------------------------------------|
| 6172   | N   | N   | . ALA ALA ALA B B | 381 381 | . 0.1027 0.0639 0.0901 0.0143 -0.0206 -  |
| 0.0019 | 1   | .   |                   |         |                                          |
| 6173   | CA  | CA  | . ALA ALA ALA B B | 381 381 | . 0.1232 0.0775 0.0963 0.0129 -0.0197    |
| 0.0001 | 1   | .   |                   |         |                                          |
| 6174   | CB  | CB  | . ALA ALA ALA B B | 381 381 | . 0.1434 0.0678 0.0998 0.0499 -0.0175    |
| 0.0028 | 1   | .   |                   |         |                                          |
| 6175   | C   | C   | . ALA ALA ALA B B | 381 381 | . 0.1227 0.0785 0.0947 -0.0011 -0.0043 - |
| 0.0094 | 1   | .   |                   |         |                                          |
| 6176   | O   | O   | . ALA ALA ALA B B | 381 381 | . 0.1484 0.0982 0.1062 0.0065 -0.0115 -  |
| 0.0082 | 1   | .   |                   |         |                                          |
| 6177   | N   | N   | . ASP ASP ASP B B | 382 382 | . 0.1185 0.0762 0.1098 0.0202 -0.0154 -  |
| 0.0103 | 1   | .   |                   |         |                                          |
| 6178   | CA  | CA  | . ASP ASP ASP B B | 382 382 | . 0.1235 0.0814 0.1206 0.0011 -0.0172    |
| 0.0224 | 1   | .   |                   |         |                                          |
| 6179   | CB  | CB  | . ASP ASP ASP B B | 382 382 | . 0.1399 0.1202 0.1111 0.0106 -0.0059    |
| 0.0286 | 1   | .   |                   |         |                                          |
| 6180   | CG  | CG  | . ASP ASP ASP B B | 382 382 | . 0.1391 0.1173 0.1535 -0.0075 0.0038    |
| 0.0218 | 1   | .   |                   |         |                                          |
| 6181   | OD1 | OD1 | . ASP ASP ASP B B | 382 382 | . 0.1835 0.1668 0.1354 0.0130 -0.0392    |
| 0.0501 | 1   | .   |                   |         |                                          |
| 6182   | OD2 | OD2 | . ASP ASP ASP B B | 382 382 | . 0.1914 0.1876 0.2054 -0.0395 -0.0192 - |
| 0.0102 | 1   | .   |                   |         |                                          |
| 6183   | C   | C   | . ASP ASP ASP B B | 382 382 | . 0.1445 0.0986 0.1087 -0.0046 -0.0234   |
| 0.0141 | 1   | .   |                   |         |                                          |
| 6184   | O   | O   | . ASP ASP ASP B B | 382 382 | . 0.1568 0.1035 0.0975 0.0011 -0.0226    |
| 0.0114 | 1   | .   |                   |         |                                          |
| 6185   | N   | N   | . LEU LEU LEU B B | 383 383 | . 0.1233 0.0803 0.1083 0.0111 -0.0039    |
| 0.0166 | 1   | .   |                   |         |                                          |
| 6186   | CA  | CA  | . LEU LEU LEU B B | 383 383 | . 0.1150 0.0557 0.0801 0.0095 0.0014     |
| 0.0166 | 1   | .   |                   |         |                                          |
| 6187   | CB  | CB  | . LEU LEU LEU B B | 383 383 | . 0.1096 0.0503 0.0627 0.0000 -0.0314    |
| 0.0087 | 1   | .   |                   |         |                                          |
| 6188   | CG  | CG  | . LEU LEU LEU B B | 383 383 | . 0.0816 0.0617 0.0930 0.0201 -0.0183 -  |
| 0.0032 | 1   | .   |                   |         |                                          |
| 6189   | CD1 | CD1 | . LEU LEU LEU B B | 383 383 | . 0.0972 0.1209 0.1029 0.0266 -0.0211    |
| 0.0524 | 1   | .   |                   |         |                                          |
| 6190   | CD2 | CD2 | . LEU LEU LEU B B | 383 383 | . 0.1486 0.0844 0.1669 -0.0393 -0.0524   |
| 0.0215 | 1   | .   |                   |         |                                          |
| 6191   | C   | C   | . LEU LEU LEU B B | 383 383 | . 0.1280 0.0749 0.1033 0.0008 -0.0150    |
| 0.0038 | 1   | .   |                   |         |                                          |
| 6192   | O   | O   | . LEU LEU LEU B B | 383 383 | . 0.1574 0.1106 0.1032 0.0103 -0.0315 -  |
| 0.0030 | 1   | .   |                   |         |                                          |
| 6193   | N   | N   | . VAL VAL VAL B B | 384 384 | . 0.1418 0.0913 0.1026 0.0104 -0.0036 -  |
| 0.0016 | 1   | .   |                   |         |                                          |
| 6194   | CA  | CA  | . VAL VAL VAL B B | 384 384 | . 0.1313 0.0914 0.1188 0.0047 0.0127 -   |
| 0.0018 | 1   | .   |                   |         |                                          |
| 6195   | CB  | CB  | . VAL VAL VAL B B | 384 384 | . 0.1178 0.1050 0.0894 0.0225 -0.0060    |
| 0.0177 | 1   | .   |                   |         |                                          |
| 6196   | CG1 | CG1 | . VAL VAL VAL B B | 384 384 | . 0.0855 0.0791 0.1195 0.0333 0.0371 -   |
| 0.0154 | 1   | .   |                   |         |                                          |
| 6197   | CG2 | CG2 | . VAL VAL VAL B B | 384 384 | . 0.1336 0.1285 0.1071 -0.0086 0.0094 -  |
| 0.0069 | 1   | .   |                   |         |                                          |
| 6198   | C   | C   | . VAL VAL VAL B B | 384 384 | . 0.1480 0.1264 0.1239 -0.0134 -0.0086   |
| 0.0056 | 1   | .   |                   |         |                                          |
| 6199   | O   | O   | . VAL VAL VAL B B | 384 384 | . 0.1734 0.1206 0.1252 -0.0010 -0.0165 - |
| 0.0103 | 1   | .   |                   |         |                                          |
| 6200   | N   | N   | . VAL VAL VAL B B | 385 385 | . 0.1440 0.0971 0.1571 0.0054 -0.0283    |
| 0.0012 | 1   | .   |                   |         |                                          |
| 6201   | CA  | CA  | . VAL VAL VAL B B | 385 385 | . 0.1467 0.1211 0.1430 -0.0188 -0.0364   |
| 0.0040 | 1   | .   |                   |         |                                          |

|        |     |     |                             |        |        |        |         |         |   |
|--------|-----|-----|-----------------------------|--------|--------|--------|---------|---------|---|
| 6202   | CB  | CB  | . VAL VAL VAL B B 385 385 . | 0.1384 | 0.1167 | 0.1505 | -0.0128 | -0.0381 | - |
| 0.0053 | 1   | .   |                             |        |        |        |         |         |   |
| 6203   | CG1 | CG1 | . VAL VAL VAL B B 385 385 . | 0.1531 | 0.1266 | 0.1707 | -0.0588 | -0.0589 | - |
| 0.0207 | 1   | .   |                             |        |        |        |         |         |   |
| 6204   | CG2 | CG2 | . VAL VAL VAL B B 385 385 . | 0.0860 | 0.1798 | 0.1398 | 0.0127  | -0.0042 |   |
| 0.0040 | 1   | .   |                             |        |        |        |         |         |   |
| 6205   | C   | C   | . VAL VAL VAL B B 385 385 . | 0.1640 | 0.1142 | 0.1447 | -0.0063 | -0.0181 |   |
| 0.0129 | 1   | .   |                             |        |        |        |         |         |   |
| 6206   | O   | O   | . VAL VAL VAL B B 385 385 . | 0.1794 | 0.1077 | 0.1644 | -0.0170 | -0.0384 | - |
| 0.0026 | 1   | .   |                             |        |        |        |         |         |   |
| 6207   | N   | N   | . GLY GLY GLY B B 386 386 . | 0.1312 | 0.1049 | 0.1458 | -0.0158 | -0.0023 |   |
| 0.0328 | 1   | .   |                             |        |        |        |         |         |   |
| 6208   | CA  | CA  | . GLY GLY GLY B B 386 386 . | 0.1588 | 0.1245 | 0.1434 | -0.0007 | -0.0145 |   |
| 0.0225 | 1   | .   |                             |        |        |        |         |         |   |
| 6209   | C   | C   | . GLY GLY GLY B B 386 386 . | 0.1861 | 0.1411 | 0.1510 | -0.0148 | -0.0144 |   |
| 0.0244 | 1   | .   |                             |        |        |        |         |         |   |
| 6210   | O   | O   | . GLY GLY GLY B B 386 386 . | 0.1540 | 0.1482 | 0.1674 | -0.0210 | -0.0264 |   |
| 0.0258 | 1   | .   |                             |        |        |        |         |         |   |
| 6211   | N   | N   | . LEU LEU LEU B B 387 387 . | 0.1537 | 0.1614 | 0.1400 | -0.0230 | -0.0048 |   |
| 0.0249 | 1   | .   |                             |        |        |        |         |         |   |
| 6212   | CA  | CA  | . LEU LEU LEU B B 387 387 . | 0.1785 | 0.1459 | 0.1515 | -0.0176 | -0.0067 |   |
| 0.0071 | 1   | .   |                             |        |        |        |         |         |   |
| 6213   | CB  | CB  | . LEU LEU LEU B B 387 387 . | 0.1803 | 0.1267 | 0.1316 | -0.0113 | -0.0021 |   |
| 0.0217 | 1   | .   |                             |        |        |        |         |         |   |
| 6214   | CG  | CG  | . LEU LEU LEU B B 387 387 . | 0.1433 | 0.1613 | 0.1537 | -0.0137 | -0.0247 | - |
| 0.0139 | 1   | .   |                             |        |        |        |         |         |   |
| 6215   | CD1 | CD1 | . LEU LEU LEU B B 387 387 . | 0.2577 | 0.1584 | 0.1392 | -0.0326 | -0.0391 | - |
| 0.0071 | 1   | .   |                             |        |        |        |         |         |   |
| 6216   | CD2 | CD2 | . LEU LEU LEU B B 387 387 . | 0.1817 | 0.1755 | 0.0916 | 0.0458  | -0.0284 |   |
| 0.0057 | 1   | .   |                             |        |        |        |         |         |   |
| 6217   | C   | C   | . LEU LEU LEU B B 387 387 . | 0.2144 | 0.1876 | 0.1773 | -0.0162 | -0.0036 |   |
| 0.0120 | 1   | .   |                             |        |        |        |         |         |   |
| 6218   | O   | O   | . LEU LEU LEU B B 387 387 . | 0.2517 | 0.1804 | 0.1788 | -0.0062 | -0.0129 |   |
| 0.0111 | 1   | .   |                             |        |        |        |         |         |   |
| 6219   | N   | N   | . CYS CYS CYS B B 388 388 . | 0.1984 | 0.1869 | 0.1727 | -0.0072 | -0.0007 | - |
| 0.0027 | 1   | .   |                             |        |        |        |         |         |   |
| 6220   | CA  | CA  | . CYS CYS CYS B B 388 388 . | 0.2456 | 0.2286 | 0.1992 | -0.0177 | -0.0092 |   |
| 0.0014 | 1   | .   |                             |        |        |        |         |         |   |
| 6221   | CB  | CB  | . CYS CYS CYS B B 388 388 . | 0.2808 | 0.2812 | 0.2088 | -0.0080 | -0.0156 |   |
| 0.0246 | 1   | .   |                             |        |        |        |         |         |   |
| 6222   | SG  | SG  | . CYS CYS CYS B B 388 388 . | 0.4877 | 0.4640 | 0.4228 | -0.0596 | -0.0712 |   |
| 0.0362 | 1   | .   |                             |        |        |        |         |         |   |
| 6223   | C   | C   | . CYS CYS CYS B B 388 388 . | 0.2411 | 0.2161 | 0.1841 | -0.0166 | -0.0093 | - |
| 0.0040 | 1   | .   |                             |        |        |        |         |         |   |
| 6224   | O   | O   | . CYS CYS CYS B B 388 388 . | 0.2755 | 0.2053 | 0.1634 | -0.0228 | -0.0075 | - |
| 0.0010 | 1   | .   |                             |        |        |        |         |         |   |
| 6225   | N   | N   | . THR THR THR B B 389 389 . | 0.2092 | 0.1705 | 0.1472 | -0.0288 | -0.0173 | - |
| 0.0150 | 1   | .   |                             |        |        |        |         |         |   |
| 6226   | CA  | CA  | . THR THR THR B B 389 389 . | 0.1930 | 0.1661 | 0.1542 | -0.0183 | -0.0126 | - |
| 0.0200 | 1   | .   |                             |        |        |        |         |         |   |
| 6227   | CB  | CB  | . THR THR THR B B 389 389 . | 0.1850 | 0.1390 | 0.1678 | -0.0140 | -0.0051 | - |
| 0.0083 | 1   | .   |                             |        |        |        |         |         |   |
| 6228   | OG1 | OG1 | . THR THR THR B B 389 389 . | 0.2351 | 0.1314 | 0.1822 | 0.0172  | -0.0100 | - |
| 0.0005 | 1   | .   |                             |        |        |        |         |         |   |
| 6229   | CG2 | CG2 | . THR THR THR B B 389 389 . | 0.1600 | 0.1225 | 0.1820 | -0.0152 | 0.0318  | - |
| 0.0234 | 1   | .   |                             |        |        |        |         |         |   |
| 6230   | C   | C   | . THR THR THR B B 389 389 . | 0.1820 | 0.1612 | 0.1489 | -0.0205 | -0.0110 | - |
| 0.0177 | 1   | .   |                             |        |        |        |         |         |   |
| 6231   | O   | O   | . THR THR THR B B 389 389 . | 0.2195 | 0.1787 | 0.1507 | -0.0138 | 0.0043  |   |
| 0.0116 | 1   | .   |                             |        |        |        |         |         |   |



|        |     |     |                             |        |        |        |         |         |   |
|--------|-----|-----|-----------------------------|--------|--------|--------|---------|---------|---|
| 6232   | N   | N   | . GLY GLY GLY B B 390 390 . | 0.1419 | 0.1327 | 0.1044 | 0.0050  | -0.0125 | - |
| 0.0078 | 1   | .   |                             |        |        |        |         |         |   |
| 6233   | CA  | CA  | . GLY GLY GLY B B 390 390 . | 0.1670 | 0.1362 | 0.1132 | 0.0149  | -0.0082 | - |
| 0.0039 | 1   | .   |                             |        |        |        |         |         |   |
| 6234   | C   | C   | . GLY GLY GLY B B 390 390 . | 0.1429 | 0.0993 | 0.0895 | 0.0147  | 0.0016  | - |
| 0.0038 | 1   | .   |                             |        |        |        |         |         |   |
| 6235   | O   | O   | . GLY GLY GLY B B 390 390 . | 0.1724 | 0.1153 | 0.1188 | 0.0098  | -0.0083 | - |
| 0.0075 | 1   | .   |                             |        |        |        |         |         |   |
| 6236   | N   | N   | . GLN GLN GLN B B 391 391 . | 0.1740 | 0.1156 | 0.0910 | 0.0166  | -0.0126 | - |
| 0.0047 | 1   | .   |                             |        |        |        |         |         |   |
| 6237   | CA  | CA  | . GLN GLN GLN B B 391 391 . | 0.1591 | 0.1337 | 0.0937 | 0.0134  | 0.0046  | - |
| 0.0224 | 1   | .   |                             |        |        |        |         |         |   |
| 6238   | CB  | CB  | . GLN GLN GLN B B 391 391 . | 0.1821 | 0.1478 | 0.1369 | 0.0115  | -0.0164 | - |
| 0.0025 | 1   | .   |                             |        |        |        |         |         |   |
| 6239   | CG  | CG  | . GLN GLN GLN B B 391 391 . | 0.1770 | 0.1717 | 0.1674 | 0.0025  | -0.0150 | - |
| 0.0073 | 1   | .   |                             |        |        |        |         |         |   |
| 6240   | CD  | CD  | . GLN GLN GLN B B 391 391 . | 0.1624 | 0.1536 | 0.1604 | -0.0166 | -0.0131 | - |
| 0.0239 | 1   | .   |                             |        |        |        |         |         |   |
| 6241   | OE1 | OE1 | . GLN GLN GLN B B 391 391 . | 0.1493 | 0.1621 | 0.1055 | 0.0073  | 0.0150  | - |
| 0.0075 | 1   | .   |                             |        |        |        |         |         |   |
| 6242   | NE2 | NE2 | . GLN GLN GLN B B 391 391 . | 0.2082 | 0.1529 | 0.1370 | -0.0030 | 0.0200  | - |
| 0.0244 | 1   | .   |                             |        |        |        |         |         |   |
| 6243   | C   | C   | . GLN GLN GLN B B 391 391 . | 0.1607 | 0.1290 | 0.1199 | 0.0228  | -0.0036 | - |
| 0.0312 | 1   | .   |                             |        |        |        |         |         |   |
| 6244   | O   | O   | . GLN GLN GLN B B 391 391 . | 0.1225 | 0.1210 | 0.0922 | 0.0157  | 0.0029  | - |
| 0.0249 | 1   | .   |                             |        |        |        |         |         |   |
| 6245   | N   | N   | . ILE ILE ILE B B 392 392 . | 0.1472 | 0.1057 | 0.0701 | 0.0016  | 0.0005  | - |
| 0.0267 | 1   | .   |                             |        |        |        |         |         |   |
| 6246   | CA  | CA  | . ILE ILE ILE B B 392 392 . | 0.1347 | 0.0988 | 0.0786 | -0.0005 | 0.0025  | - |
| 0.0035 | 1   | .   |                             |        |        |        |         |         |   |
| 6247   | CB  | CB  | . ILE ILE ILE B B 392 392 . | 0.1426 | 0.0958 | 0.1005 | 0.0199  | 0.0077  | - |
| 0.0137 | 1   | .   |                             |        |        |        |         |         |   |
| 6248   | CG1 | CG1 | . ILE ILE ILE B B 392 392 . | 0.1240 | 0.0613 | 0.0623 | -0.0052 | 0.0056  | - |
| 0.0060 | 1   | .   |                             |        |        |        |         |         |   |
| 6249   | CD1 | CD1 | . ILE ILE ILE B B 392 392 . | 0.1387 | 0.1407 | 0.0790 | -0.0014 | 0.0584  | - |
| 0.0181 | 1   | .   |                             |        |        |        |         |         |   |
| 6250   | CG2 | CG2 | . ILE ILE ILE B B 392 392 . | 0.1509 | 0.0357 | 0.1244 | 0.0362  | -0.0232 | - |
| 0.0074 | 1   | .   |                             |        |        |        |         |         |   |
| 6251   | C   | C   | . ILE ILE ILE B B 392 392 . | 0.1347 | 0.1208 | 0.0974 | 0.0052  | 0.0020  | - |
| 0.0011 | 1   | .   |                             |        |        |        |         |         |   |
| 6252   | O   | O   | . ILE ILE ILE B B 392 392 . | 0.1432 | 0.1037 | 0.0734 | 0.0161  | 0.0070  | - |
| 0.0079 | 1   | .   |                             |        |        |        |         |         |   |
| 6253   | N   | N   | . LYS LYS LYS B B 393 393 . | 0.1256 | 0.0844 | 0.0920 | 0.0015  | 0.0035  | - |
| 0.0147 | 1   | .   |                             |        |        |        |         |         |   |
| 6254   | CA  | CA  | . LYS LYS LYS B B 393 393 . | 0.0923 | 0.0847 | 0.0636 | -0.0010 | 0.0178  | - |
| 0.0103 | 1   | .   |                             |        |        |        |         |         |   |
| 6255   | CB  | CB  | . LYS LYS LYS B B 393 393 . | 0.1263 | 0.0654 | 0.0385 | 0.0152  | 0.0219  | - |
| 0.0148 | 1   | .   |                             |        |        |        |         |         |   |
| 6256   | CG  | CG  | . LYS LYS LYS B B 393 393 . | 0.1460 | 0.0695 | 0.0451 | 0.0182  | 0.0191  | - |
| 0.0271 | 1   | .   |                             |        |        |        |         |         |   |
| 6257   | CD  | CD  | . LYS LYS LYS B B 393 393 . | 0.1550 | 0.0927 | 0.1405 | 0.0149  | 0.0127  | - |
| 0.0188 | 1   | .   |                             |        |        |        |         |         |   |
| 6258   | CE  | CE  | . LYS LYS LYS B B 393 393 . | 0.1490 | 0.0800 | 0.1157 | -0.0017 | 0.0138  | - |
| 0.0317 | 1   | .   |                             |        |        |        |         |         |   |
| 6259   | NZ  | NZ  | . LYS LYS LYS B B 393 393 . | 0.1606 | 0.1072 | 0.1048 | -0.0179 | 0.0012  | - |
| 0.0092 | 1   | .   |                             |        |        |        |         |         |   |
| 6260   | C   | C   | . LYS LYS LYS B B 393 393 . | 0.1307 | 0.1121 | 0.0918 | 0.0136  | 0.0068  | - |
| 0.0117 | 1   | .   |                             |        |        |        |         |         |   |
| 6261   | O   | O   | . LYS LYS LYS B B 393 393 . | 0.1201 | 0.1225 | 0.0744 | 0.0349  | 0.0101  | - |
| 0.0239 | 1   | .   |                             |        |        |        |         |         |   |

|        |     |     |                             |        |        |        |         |         |   |
|--------|-----|-----|-----------------------------|--------|--------|--------|---------|---------|---|
| 6262   | N   | N   | . THR THR THR B B 394 394 . | 0.1244 | 0.1078 | 0.0902 | 0.0117  | -0.0013 |   |
| 0.0150 | 1   | .   |                             |        |        |        |         |         |   |
| 6263   | CA  | CA  | . THR THR THR B B 394 394 . | 0.1120 | 0.0932 | 0.0898 | 0.0113  | 0.0080  | - |
| 0.0012 | 1   | .   |                             |        |        |        |         |         |   |
| 6264   | CB  | CB  | . THR THR THR B B 394 394 . | 0.1393 | 0.0935 | 0.1061 | 0.0213  | 0.0288  | - |
| 0.0047 | 1   | .   |                             |        |        |        |         |         |   |
| 6265   | OG1 | OG1 | . THR THR THR B B 394 394 . | 0.1601 | 0.1298 | 0.0760 | 0.0172  | 0.0267  | - |
| 0.0208 | 1   | .   |                             |        |        |        |         |         |   |
| 6266   | CG2 | CG2 | . THR THR THR B B 394 394 . | 0.0971 | 0.0858 | 0.1241 | -0.0021 | 0.0005  | - |
| 0.0161 | 1   | .   |                             |        |        |        |         |         |   |
| 6267   | C   | C   | . THR THR THR B B 394 394 . | 0.1305 | 0.1032 | 0.0909 | -0.0012 | 0.0006  | - |
| 0.0084 | 1   | .   |                             |        |        |        |         |         |   |
| 6268   | O   | O   | . THR THR THR B B 394 394 . | 0.1412 | 0.1005 | 0.1069 | 0.0002  | 0.0000  |   |
| 0.0065 | 1   | .   |                             |        |        |        |         |         |   |
| 6269   | N   | N   | . GLY GLY GLY B B 395 395 . | 0.1039 | 0.1081 | 0.0836 | 0.0160  | -0.0049 | - |
| 0.0036 | 1   | .   |                             |        |        |        |         |         |   |
| 6270   | CA  | CA  | . GLY GLY GLY B B 395 395 . | 0.1053 | 0.1118 | 0.0871 | 0.0172  | -0.0021 | - |
| 0.0137 | 1   | .   |                             |        |        |        |         |         |   |
| 6271   | C   | C   | . GLY GLY GLY B B 395 395 . | 0.1046 | 0.0994 | 0.0812 | 0.0147  | -0.0067 |   |
| 0.0000 | 1   | .   |                             |        |        |        |         |         |   |
| 6272   | O   | O   | . GLY GLY GLY B B 395 395 . | 0.1455 | 0.0612 | 0.0995 | 0.0230  | 0.0039  |   |
| 0.0164 | 1   | .   |                             |        |        |        |         |         |   |
| 6273   | N   | N   | . ALA ALA ALA B B 396 396 . | 0.1166 | 0.1133 | 0.1125 | 0.0269  | 0.0009  | - |
| 0.0029 | 1   | .   |                             |        |        |        |         |         |   |
| 6274   | CA  | CA  | . ALA ALA ALA B B 396 396 . | 0.1068 | 0.0931 | 0.1110 | 0.0380  | -0.0026 | - |
| 0.0117 | 1   | .   |                             |        |        |        |         |         |   |
| 6275   | CB  | CB  | . ALA ALA ALA B B 396 396 . | 0.1048 | 0.1259 | 0.1377 | 0.0292  | -0.0050 | - |
| 0.0031 | 1   | .   |                             |        |        |        |         |         |   |
| 6276   | C   | C   | . ALA ALA ALA B B 396 396 . | 0.1022 | 0.1021 | 0.1258 | 0.0219  | 0.0142  | - |
| 0.0096 | 1   | .   |                             |        |        |        |         |         |   |
| 6277   | O   | O   | . ALA ALA ALA B B 396 396 . | 0.1080 | 0.1058 | 0.1210 | 0.0133  | 0.0206  | - |
| 0.0126 | 1   | .   |                             |        |        |        |         |         |   |
| 6278   | N   | N   | . PRO PRO PRO B B 397 397 . | 0.1097 | 0.0919 | 0.1157 | 0.0058  | 0.0094  | - |
| 0.0084 | 1   | .   |                             |        |        |        |         |         |   |
| 6279   | CA  | CA  | . PRO PRO PRO B B 397 397 . | 0.1292 | 0.0748 | 0.0972 | 0.0162  | 0.0062  | - |
| 0.0020 | 1   | .   |                             |        |        |        |         |         |   |
| 6280   | CB  | CB  | . PRO PRO PRO B B 397 397 . | 0.1377 | 0.0950 | 0.1166 | 0.0200  | 0.0267  | - |
| 0.0225 | 1   | .   |                             |        |        |        |         |         |   |
| 6281   | CG  | CG  | . PRO PRO PRO B B 397 397 . | 0.1474 | 0.0843 | 0.1586 | 0.0223  | 0.0446  |   |
| 0.0153 | 1   | .   |                             |        |        |        |         |         |   |
| 6282   | CD  | CD  | . PRO PRO PRO B B 397 397 . | 0.1032 | 0.0896 | 0.1209 | 0.0200  | 0.0184  |   |
| 0.0009 | 1   | .   |                             |        |        |        |         |         |   |
| 6283   | C   | C   | . PRO PRO PRO B B 397 397 . | 0.1357 | 0.0935 | 0.0948 | 0.0190  | 0.0018  | - |
| 0.0021 | 1   | .   |                             |        |        |        |         |         |   |
| 6284   | O   | O   | . PRO PRO PRO B B 397 397 . | 0.1478 | 0.1051 | 0.1054 | 0.0361  | 0.0054  | - |
| 0.0185 | 1   | .   |                             |        |        |        |         |         |   |
| 6285   | N   | N   | . CYS CYS CYS B B 398 398 . | 0.1320 | 0.0801 | 0.0676 | 0.0055  | -0.0071 | - |
| 0.0027 | 1   | .   |                             |        |        |        |         |         |   |
| 6286   | CA  | CA  | . CYS CYS CYS B B 398 398 . | 0.1058 | 0.0931 | 0.0796 | 0.0147  | -0.0048 | - |
| 0.0007 | 1   | .   |                             |        |        |        |         |         |   |
| 6287   | CB  | CB  | . CYS CYS CYS B B 398 398 . | 0.1352 | 0.0959 | 0.0787 | -0.0091 | -0.0010 |   |
| 0.0117 | 1   | .   |                             |        |        |        |         |         |   |
| 6288   | SG  | SG  | . CYS CYS CYS B B 398 398 . | 0.1088 | 0.1429 | 0.1328 | 0.0018  | 0.0093  | - |
| 0.0043 | 1   | .   |                             |        |        |        |         |         |   |
| 6289   | C   | C   | . CYS CYS CYS B B 398 398 . | 0.1221 | 0.0978 | 0.0872 | 0.0125  | 0.0009  |   |
| 0.0066 | 1   | .   |                             |        |        |        |         |         |   |
| 6290   | O   | O   | . CYS CYS CYS B B 398 398 . | 0.1071 | 0.0907 | 0.0908 | 0.0150  | -0.0005 | - |
| 0.0049 | 1   | .   |                             |        |        |        |         |         |   |
| 6291   | N   | N   | . ARG ARG ARG B B 399 399 . | 0.1172 | 0.0861 | 0.0888 | 0.0024  | 0.0070  | - |
| 0.0009 | 1   | .   |                             |        |        |        |         |         |   |

|        |     |     |                             |        |        |        |         |         |   |
|--------|-----|-----|-----------------------------|--------|--------|--------|---------|---------|---|
| 6292   | CA  | CA  | . ARG ARG ARG B B 399 399 . | 0.0923 | 0.0753 | 0.1138 | -0.0044 | 0.0166  |   |
| 0.0011 | 1   | .   |                             |        |        |        |         |         |   |
| 6293   | CB  | CB  | . ARG ARG ARG B B 399 399 . | 0.0695 | 0.0468 | 0.0995 | -0.0224 | -0.0045 |   |
| 0.0008 | 1   | .   |                             |        |        |        |         |         |   |
| 6294   | CG  | CG  | . ARG ARG ARG B B 399 399 . | 0.0483 | 0.0852 | 0.1069 | -0.0062 | -0.0094 |   |
| 0.0137 | 1   | .   |                             |        |        |        |         |         |   |
| 6295   | CD  | CD  | . ARG ARG ARG B B 399 399 . | 0.0993 | 0.0689 | 0.1304 | 0.0295  | 0.0280  |   |
| 0.0163 | 1   | .   |                             |        |        |        |         |         |   |
| 6296   | NE  | NE  | . ARG ARG ARG B B 399 399 . | 0.1299 | 0.0733 | 0.0868 | 0.0077  | 0.0051  | - |
| 0.0036 | 1   | .   |                             |        |        |        |         |         |   |
| 6297   | CZ  | CZ  | . ARG ARG ARG B B 399 399 . | 0.0947 | 0.0905 | 0.0862 | 0.0176  | 0.0103  |   |
| 0.0046 | 1   | .   |                             |        |        |        |         |         |   |
| 6298   | NH1 | NH1 | . ARG ARG ARG B B 399 399 . | 0.1072 | 0.1208 | 0.0837 | 0.0190  | -0.0135 |   |
| 0.0140 | 1   | .   |                             |        |        |        |         |         |   |
| 6299   | NH2 | NH2 | . ARG ARG ARG B B 399 399 . | 0.1014 | 0.0713 | 0.0883 | 0.0438  | -0.0145 | - |
| 0.0201 | 1   | .   |                             |        |        |        |         |         |   |
| 6300   | C   | C   | . ARG ARG ARG B B 399 399 . | 0.0898 | 0.0910 | 0.0984 | -0.0009 | -0.0005 |   |
| 0.0100 | 1   | .   |                             |        |        |        |         |         |   |
| 6301   | O   | O   | . ARG ARG ARG B B 399 399 . | 0.1011 | 0.0620 | 0.0757 | -0.0042 | 0.0032  |   |
| 0.0145 | 1   | .   |                             |        |        |        |         |         |   |
| 6302   | N   | N   | . SER SER SER B B 400 400 . | 0.0757 | 0.0803 | 0.0777 | 0.0074  | 0.0196  |   |
| 0.0110 | 1   | .   |                             |        |        |        |         |         |   |
| 6303   | CA  | CA  | . SER SER SER B B 400 400 . | 0.0724 | 0.0482 | 0.0705 | 0.0142  | 0.0170  |   |
| 0.0146 | 1   | .   |                             |        |        |        |         |         |   |
| 6304   | CB  | CB  | . SER SER SER B B 400 400 . | 0.1053 | 0.0898 | 0.0423 | 0.0359  | 0.0118  |   |
| 0.0248 | 1   | .   |                             |        |        |        |         |         |   |
| 6305   | OG  | OG  | . SER SER SER B B 400 400 . | 0.0981 | 0.0801 | 0.0849 | 0.0357  | -0.0116 | - |
| 0.0072 | 1   | .   |                             |        |        |        |         |         |   |
| 6306   | C   | C   | . SER SER SER B B 400 400 . | 0.0707 | 0.0700 | 0.0478 | -0.0019 | 0.0164  |   |
| 0.0033 | 1   | .   |                             |        |        |        |         |         |   |
| 6307   | O   | O   | . SER SER SER B B 400 400 . | 0.0755 | 0.0859 | 0.0871 | 0.0107  | 0.0170  | - |
| 0.0007 | 1   | .   |                             |        |        |        |         |         |   |
| 6308   | N   | N   | . GLU GLU GLU B B 401 401 . | 0.0916 | 0.0608 | 0.0629 | 0.0227  | 0.0053  |   |
| 0.0022 | 1   | .   |                             |        |        |        |         |         |   |
| 6309   | CA  | CA  | . GLU GLU GLU B B 401 401 . | 0.0974 | 0.0811 | 0.0828 | 0.0196  | -0.0071 | - |
| 0.0155 | 1   | .   |                             |        |        |        |         |         |   |
| 6310   | CB  | CB  | . GLU GLU GLU B B 401 401 . | 0.0708 | 0.0552 | 0.0996 | 0.0175  | 0.0255  | - |
| 0.0066 | 1   | .   |                             |        |        |        |         |         |   |
| 6311   | CG  | CG  | . GLU GLU GLU B B 401 401 . | 0.0766 | 0.0895 | 0.0787 | 0.0043  | 0.0192  | - |
| 0.0058 | 1   | .   |                             |        |        |        |         |         |   |
| 6312   | CD  | CD  | . GLU GLU GLU B B 401 401 . | 0.0973 | 0.0930 | 0.0630 | 0.0110  | 0.0169  | - |
| 0.0168 | 1   | .   |                             |        |        |        |         |         |   |
| 6313   | OE1 | OE1 | . GLU GLU GLU B B 401 401 . | 0.0998 | 0.0772 | 0.1187 | 0.0120  | -0.0100 | - |
| 0.0068 | 1   | .   |                             |        |        |        |         |         |   |
| 6314   | OE2 | OE2 | . GLU GLU GLU B B 401 401 . | 0.0967 | 0.0624 | 0.0891 | 0.0231  | 0.0157  |   |
| 0.0056 | 1   | .   |                             |        |        |        |         |         |   |
| 6315   | C   | C   | . GLU GLU GLU B B 401 401 . | 0.0952 | 0.0781 | 0.0757 | 0.0087  | 0.0067  |   |
| 0.0021 | 1   | .   |                             |        |        |        |         |         |   |
| 6316   | O   | O   | . GLU GLU GLU B B 401 401 . | 0.0868 | 0.0954 | 0.0630 | -0.0001 | -0.0149 |   |
| 0.0069 | 1   | .   |                             |        |        |        |         |         |   |
| 6317   | N   | N   | . ARG ARG ARG B B 402 402 . | 0.0745 | 0.0782 | 0.0717 | -0.0012 | 0.0078  | - |
| 0.0045 | 1   | .   |                             |        |        |        |         |         |   |
| 6318   | CA  | CA  | . ARG ARG ARG B B 402 402 . | 0.0805 | 0.0658 | 0.0619 | -0.0038 | 0.0028  | - |
| 0.0096 | 1   | .   |                             |        |        |        |         |         |   |
| 6319   | CB  | CB  | . ARG ARG ARG B B 402 402 . | 0.0682 | 0.0517 | 0.0605 | 0.0046  | -0.0015 | - |
| 0.0117 | 1   | .   |                             |        |        |        |         |         |   |
| 6320   | CG  | CG  | . ARG ARG ARG B B 402 402 . | 0.0704 | 0.0503 | 0.0624 | 0.0279  | -0.0085 |   |
| 0.0051 | 1   | .   |                             |        |        |        |         |         |   |
| 6321   | CD  | CD  | . ARG ARG ARG B B 402 402 . | 0.0582 | 0.0455 | 0.0554 | 0.0198  | -0.0218 | - |
| 0.0245 | 1   | .   |                             |        |        |        |         |         |   |



|        |     |     |                             |        |        |        |         |         |   |
|--------|-----|-----|-----------------------------|--------|--------|--------|---------|---------|---|
| 6352   | CB  | CB  | . TYR TYR TYR B B 406 406 . | 0.0919 | 0.0958 | 0.0919 | -0.0125 | 0.0211  |   |
| 0.0147 | 1   | .   |                             |        |        |        |         |         |   |
| 6353   | CG  | CG  | . TYR TYR TYR B B 406 406 . | 0.1320 | 0.0920 | 0.0961 | 0.0096  | -0.0043 |   |
| 0.0125 | 1   | .   |                             |        |        |        |         |         |   |
| 6354   | CD1 | CD1 | . TYR TYR TYR B B 406 406 . | 0.0945 | 0.0981 | 0.0955 | -0.0067 | -0.0034 | - |
| 0.0025 | 1   | .   |                             |        |        |        |         |         |   |
| 6355   | CE1 | CE1 | . TYR TYR TYR B B 406 406 . | 0.1353 | 0.0953 | 0.1375 | -0.0049 | 0.0046  | - |
| 0.0030 | 1   | .   |                             |        |        |        |         |         |   |
| 6356   | CZ  | CZ  | . TYR TYR TYR B B 406 406 . | 0.0971 | 0.0783 | 0.0837 | 0.0043  | 0.0070  |   |
| 0.0006 | 1   | .   |                             |        |        |        |         |         |   |
| 6357   | OH  | OH  | . TYR TYR TYR B B 406 406 . | 0.1181 | 0.0909 | 0.0684 | 0.0198  | 0.0242  |   |
| 0.0044 | 1   | .   |                             |        |        |        |         |         |   |
| 6358   | CE2 | CE2 | . TYR TYR TYR B B 406 406 . | 0.0877 | 0.0927 | 0.0967 | -0.0019 | 0.0133  |   |
| 0.0029 | 1   | .   |                             |        |        |        |         |         |   |
| 6359   | CD2 | CD2 | . TYR TYR TYR B B 406 406 . | 0.1139 | 0.0943 | 0.0927 | -0.0055 | 0.0272  | - |
| 0.0144 | 1   | .   |                             |        |        |        |         |         |   |
| 6360   | C   | C   | . TYR TYR TYR B B 406 406 . | 0.1276 | 0.0962 | 0.1077 | 0.0111  | -0.0089 |   |
| 0.0053 | 1   | .   |                             |        |        |        |         |         |   |
| 6361   | O   | O   | . TYR TYR TYR B B 406 406 . | 0.1447 | 0.0852 | 0.0504 | 0.0082  | 0.0044  | - |
| 0.0163 | 1   | .   |                             |        |        |        |         |         |   |
| 6362   | N   | N   | . ASN ASN ASN B B 407 407 . | 0.1124 | 0.0788 | 0.0752 | 0.0237  | 0.0075  | - |
| 0.0070 | 1   | .   |                             |        |        |        |         |         |   |
| 6363   | CA  | CA  | . ASN ASN ASN B B 407 407 . | 0.0786 | 0.0913 | 0.0604 | 0.0011  | 0.0079  |   |
| 0.0031 | 1   | .   |                             |        |        |        |         |         |   |
| 6364   | CB  | CB  | . ASN ASN ASN B B 407 407 . | 0.0959 | 0.0778 | 0.0694 | -0.0025 | -0.0152 |   |
| 0.0095 | 1   | .   |                             |        |        |        |         |         |   |
| 6365   | CG  | CG  | . ASN ASN ASN B B 407 407 . | 0.0669 | 0.0806 | 0.0625 | 0.0191  | 0.0025  |   |
| 0.0221 | 1   | .   |                             |        |        |        |         |         |   |
| 6366   | OD1 | OD1 | . ASN ASN ASN B B 407 407 . | 0.1376 | 0.0886 | 0.0995 | 0.0103  | 0.0246  |   |
| 0.0163 | 1   | .   |                             |        |        |        |         |         |   |
| 6367   | ND2 | ND2 | . ASN ASN ASN B B 407 407 . | 0.1383 | 0.0506 | 0.1019 | -0.0010 | 0.0095  | - |
| 0.0057 | 1   | .   |                             |        |        |        |         |         |   |
| 6368   | C   | C   | . ASN ASN ASN B B 407 407 . | 0.0976 | 0.1064 | 0.0772 | 0.0015  | 0.0056  | - |
| 0.0093 | 1   | .   |                             |        |        |        |         |         |   |
| 6369   | O   | O   | . ASN ASN ASN B B 407 407 . | 0.0972 | 0.0895 | 0.1222 | 0.0079  | -0.0048 | - |
| 0.0079 | 1   | .   |                             |        |        |        |         |         |   |
| 6370   | N   | N   | . GLN GLN GLN B B 408 408 . | 0.0970 | 0.1050 | 0.0751 | 0.0060  | -0.0016 |   |
| 0.0150 | 1   | .   |                             |        |        |        |         |         |   |
| 6371   | CA  | CA  | . GLN GLN GLN B B 408 408 . | 0.1105 | 0.1168 | 0.1020 | 0.0100  | -0.0043 | - |
| 0.0084 | 1   | .   |                             |        |        |        |         |         |   |
| 6372   | CB  | CB  | . GLN GLN GLN B B 408 408 . | 0.1202 | 0.1287 | 0.1168 | 0.0274  | 0.0060  |   |
| 0.0037 | 1   | .   |                             |        |        |        |         |         |   |
| 6373   | CG  | CG  | . GLN GLN GLN B B 408 408 . | 0.1262 | 0.1660 | 0.1290 | -0.0201 | -0.0211 |   |
| 0.0188 | 1   | .   |                             |        |        |        |         |         |   |
| 6374   | CD  | CD  | . GLN GLN GLN B B 408 408 . | 0.1463 | 0.1319 | 0.1798 | 0.0065  | -0.0077 |   |
| 0.0058 | 1   | .   |                             |        |        |        |         |         |   |
| 6375   | OE1 | OE1 | . GLN GLN GLN B B 408 408 . | 0.1917 | 0.1648 | 0.1927 | 0.0034  | 0.0044  |   |
| 0.0213 | 1   | .   |                             |        |        |        |         |         |   |
| 6376   | NE2 | NE2 | . GLN GLN GLN B B 408 408 . | 0.1602 | 0.1715 | 0.1708 | -0.0351 | -0.0139 |   |
| 0.0147 | 1   | .   |                             |        |        |        |         |         |   |
| 6377   | C   | C   | . GLN GLN GLN B B 408 408 . | 0.1026 | 0.0980 | 0.0985 | 0.0084  | 0.0050  |   |
| 0.0004 | 1   | .   |                             |        |        |        |         |         |   |
| 6378   | O   | O   | . GLN GLN GLN B B 408 408 . | 0.1212 | 0.1112 | 0.0880 | 0.0120  | -0.0142 | - |
| 0.0206 | 1   | .   |                             |        |        |        |         |         |   |
| 6379   | N   | N   | . LEU LEU LEU B B 409 409 . | 0.1411 | 0.1058 | 0.1058 | 0.0140  | -0.0002 |   |
| 0.0045 | 1   | .   |                             |        |        |        |         |         |   |
| 6380   | CA  | CA  | . LEU LEU LEU B B 409 409 . | 0.1147 | 0.0702 | 0.1057 | 0.0163  | 0.0058  | - |
| 0.0054 | 1   | .   |                             |        |        |        |         |         |   |
| 6381   | CB  | CB  | . LEU LEU LEU B B 409 409 . | 0.1099 | 0.0877 | 0.1106 | 0.0079  | -0.0113 | - |
| 0.0021 | 1   | .   |                             |        |        |        |         |         |   |

|        |     |     |                             |        |        |        |         |         |   |
|--------|-----|-----|-----------------------------|--------|--------|--------|---------|---------|---|
| 6382   | CG  | CG  | . LEU LEU LEU B B 409 409 . | 0.1095 | 0.1136 | 0.1822 | 0.0007  | 0.0041  |   |
| 0.0086 | 1   | .   |                             |        |        |        |         |         |   |
| 6383   | CD1 | CD1 | . LEU LEU LEU B B 409 409 . | 0.1366 | 0.1683 | 0.1281 | -0.0214 | 0.0086  |   |
| 0.0424 | 1   | .   |                             |        |        |        |         |         |   |
| 6384   | CD2 | CD2 | . LEU LEU LEU B B 409 409 . | 0.1494 | 0.0883 | 0.0919 | 0.0292  | -0.0171 | - |
| 0.0002 | 1   | .   |                             |        |        |        |         |         |   |
| 6385   | C   | C   | . LEU LEU LEU B B 409 409 . | 0.1309 | 0.0931 | 0.1325 | 0.0087  | -0.0128 | - |
| 0.0064 | 1   | .   |                             |        |        |        |         |         |   |
| 6386   | O   | O   | . LEU LEU LEU B B 409 409 . | 0.1230 | 0.0834 | 0.1347 | -0.0007 | -0.0019 | - |
| 0.0077 | 1   | .   |                             |        |        |        |         |         |   |
| 6387   | N   | N   | . MET MET MET B B 410 410 . | 0.1070 | 0.0713 | 0.0895 | 0.0171  | -0.0216 | - |
| 0.0028 | 1   | .   |                             |        |        |        |         |         |   |
| 6388   | CA  | CA  | . MET MET MET B B 410 410 . | 0.1184 | 0.0849 | 0.1011 | 0.0128  | -0.0220 |   |
| 0.0044 | 1   | .   |                             |        |        |        |         |         |   |
| 6389   | CB  | CB  | . MET MET MET B B 410 410 . | 0.1172 | 0.0966 | 0.1319 | 0.0403  | -0.0199 |   |
| 0.0068 | 1   | .   |                             |        |        |        |         |         |   |
| 6390   | CG  | CG  | . MET MET MET B B 410 410 . | 0.1359 | 0.1590 | 0.1308 | 0.0163  | -0.0389 |   |
| 0.0012 | 1   | .   |                             |        |        |        |         |         |   |
| 6391   | SD  | SD  | . MET MET MET B B 410 410 . | 0.2066 | 0.1733 | 0.1514 | 0.0115  | -0.0187 |   |
| 0.0132 | 1   | .   |                             |        |        |        |         |         |   |
| 6392   | CE  | CE  | . MET MET MET B B 410 410 . | 0.1539 | 0.1857 | 0.1131 | 0.0129  | 0.0075  | - |
| 0.0565 | 1   | .   |                             |        |        |        |         |         |   |
| 6393   | C   | C   | . MET MET MET B B 410 410 . | 0.1252 | 0.1070 | 0.0967 | 0.0077  | -0.0121 |   |
| 0.0092 | 1   | .   |                             |        |        |        |         |         |   |
| 6394   | O   | O   | . MET MET MET B B 410 410 . | 0.1770 | 0.1114 | 0.1099 | 0.0099  | 0.0000  | - |
| 0.0018 | 1   | .   |                             |        |        |        |         |         |   |
| 6395   | N   | N   | . ARG ARG ARG B B 411 411 . | 0.1346 | 0.1185 | 0.1144 | 0.0113  | -0.0042 |   |
| 0.0160 | 1   | .   |                             |        |        |        |         |         |   |
| 6396   | CA  | CA  | . ARG ARG ARG B B 411 411 . | 0.1141 | 0.1232 | 0.0992 | -0.0037 | -0.0162 |   |
| 0.0176 | 1   | .   |                             |        |        |        |         |         |   |
| 6397   | CB  | CB  | . ARG ARG ARG B B 411 411 . | 0.1217 | 0.1202 | 0.0961 | 0.0048  | -0.0180 |   |
| 0.0213 | 1   | .   |                             |        |        |        |         |         |   |
| 6398   | CG  | CG  | . ARG ARG ARG B B 411 411 . | 0.1205 | 0.1151 | 0.0939 | 0.0025  | -0.0049 | - |
| 0.0032 | 1   | .   |                             |        |        |        |         |         |   |
| 6399   | CD  | CD  | . ARG ARG ARG B B 411 411 . | 0.1136 | 0.1934 | 0.0687 | 0.0162  | 0.0015  |   |
| 0.0145 | 1   | .   |                             |        |        |        |         |         |   |
| 6400   | NE  | NE  | . ARG ARG ARG B B 411 411 . | 0.1740 | 0.1505 | 0.0807 | -0.0234 | 0.0233  | - |
| 0.0113 | 1   | .   |                             |        |        |        |         |         |   |
| 6401   | CZ  | CZ  | . ARG ARG ARG B B 411 411 . | 0.1868 | 0.1229 | 0.1139 | 0.0105  | -0.0038 |   |
| 0.0069 | 1   | .   |                             |        |        |        |         |         |   |
| 6402   | NH1 | NH1 | . ARG ARG ARG B B 411 411 . | 0.1809 | 0.1064 | 0.1065 | 0.0163  | -0.0545 |   |
| 0.0277 | 1   | .   |                             |        |        |        |         |         |   |
| 6403   | NH2 | NH2 | . ARG ARG ARG B B 411 411 . | 0.2043 | 0.1486 | 0.1763 | 0.0337  | 0.0075  |   |
| 0.0146 | 1   | .   |                             |        |        |        |         |         |   |
| 6404   | C   | C   | . ARG ARG ARG B B 411 411 . | 0.1546 | 0.1255 | 0.1100 | -0.0139 | -0.0201 |   |
| 0.0153 | 1   | .   |                             |        |        |        |         |         |   |
| 6405   | O   | O   | . ARG ARG ARG B B 411 411 . | 0.1626 | 0.1305 | 0.1235 | -0.0105 | -0.0043 |   |
| 0.0452 | 1   | .   |                             |        |        |        |         |         |   |
| 6406   | N   | N   | . ILE ILE ILE B B 412 412 . | 0.1252 | 0.1037 | 0.1124 | 0.0003  | -0.0357 |   |
| 0.0186 | 1   | .   |                             |        |        |        |         |         |   |
| 6407   | CA  | CA  | . ILE ILE ILE B B 412 412 . | 0.1419 | 0.1074 | 0.1180 | -0.0058 | -0.0233 |   |
| 0.0197 | 1   | .   |                             |        |        |        |         |         |   |
| 6408   | CB  | CB  | . ILE ILE ILE B B 412 412 . | 0.1416 | 0.1125 | 0.1208 | 0.0033  | -0.0315 |   |
| 0.0142 | 1   | .   |                             |        |        |        |         |         |   |
| 6409   | CG1 | CG1 | . ILE ILE ILE B B 412 412 . | 0.1214 | 0.1023 | 0.0962 | -0.0016 | -0.0241 |   |
| 0.0187 | 1   | .   |                             |        |        |        |         |         |   |
| 6410   | CD1 | CD1 | . ILE ILE ILE B B 412 412 . | 0.1849 | 0.0622 | 0.1537 | 0.0121  | -0.0599 |   |
| 0.0160 | 1   | .   |                             |        |        |        |         |         |   |
| 6411   | CG2 | CG2 | . ILE ILE ILE B B 412 412 . | 0.1535 | 0.1444 | 0.1184 | -0.0272 | -0.0315 |   |
| 0.0320 | 1   | .   |                             |        |        |        |         |         |   |

|        |     |     |                             |        |        |        |         |         |   |
|--------|-----|-----|-----------------------------|--------|--------|--------|---------|---------|---|
| 6412   | C   | C   | . ILE ILE ILE B B 412 412 . | 0.1371 | 0.1164 | 0.1116 | -0.0050 | -0.0112 |   |
| 0.0084 | 1   | .   |                             |        |        |        |         |         |   |
| 6413   | O   | O   | . ILE ILE ILE B B 412 412 . | 0.1836 | 0.1605 | 0.1503 | 0.0147  | -0.0338 |   |
| 0.0153 | 1   | .   |                             |        |        |        |         |         |   |
| 6414   | N   | N   | . GLU GLU GLU B B 413 413 . | 0.1645 | 0.1205 | 0.1039 | 0.0125  | 0.0019  |   |
| 0.0091 | 1   | .   |                             |        |        |        |         |         |   |
| 6415   | CA  | CA  | . GLU GLU GLU B B 413 413 . | 0.1630 | 0.0992 | 0.1176 | -0.0057 | 0.0013  | - |
| 0.0020 | 1   | .   |                             |        |        |        |         |         |   |
| 6416   | CB  | CB  | . GLU GLU GLU B B 413 413 . | 0.1625 | 0.1114 | 0.1208 | 0.0042  | 0.0165  | - |
| 0.0236 | 1   | .   |                             |        |        |        |         |         |   |
| 6417   | CG  | CG  | . GLU GLU GLU B B 413 413 . | 0.2027 | 0.1440 | 0.2041 | -0.0053 | 0.0456  |   |
| 0.0024 | 1   | .   |                             |        |        |        |         |         |   |
| 6418   | CD  | CD  | . GLU GLU GLU B B 413 413 . | 0.1897 | 0.1451 | 0.2153 | -0.0226 | 0.0040  |   |
| 0.0035 | 1   | .   |                             |        |        |        |         |         |   |
| 6419   | OE1 | OE1 | . GLU GLU GLU B B 413 413 . | 0.2461 | 0.1230 | 0.2414 | -0.0484 | -0.0117 |   |
| 0.0425 | 1   | .   |                             |        |        |        |         |         |   |
| 6420   | OE2 | OE2 | . GLU GLU GLU B B 413 413 . | 0.2848 | 0.1727 | 0.1895 | 0.0140  | 0.0005  | - |
| 0.0028 | 1   | .   |                             |        |        |        |         |         |   |
| 6421   | C   | C   | . GLU GLU GLU B B 413 413 . | 0.1840 | 0.1041 | 0.1112 | -0.0134 | -0.0179 |   |
| 0.0007 | 1   | .   |                             |        |        |        |         |         |   |
| 6422   | O   | O   | . GLU GLU GLU B B 413 413 . | 0.1871 | 0.1015 | 0.1739 | -0.0148 | -0.0006 |   |
| 0.0044 | 1   | .   |                             |        |        |        |         |         |   |
| 6423   | N   | N   | . GLU GLU GLU B B 414 414 . | 0.1938 | 0.1005 | 0.1137 | -0.0261 | -0.0180 |   |
| 0.0182 | 1   | .   |                             |        |        |        |         |         |   |
| 6424   | CA  | CA  | . GLU GLU GLU B B 414 414 . | 0.2083 | 0.1421 | 0.1301 | -0.0230 | -0.0190 |   |
| 0.0125 | 1   | .   |                             |        |        |        |         |         |   |
| 6425   | CB  | CB  | . GLU GLU GLU B B 414 414 . | 0.2494 | 0.1568 | 0.1359 | -0.0210 | -0.0204 |   |
| 0.0239 | 1   | .   |                             |        |        |        |         |         |   |
| 6426   | CG  | CG  | . GLU GLU GLU B B 414 414 . | 0.2974 | 0.2126 | 0.1854 | 0.0012  | -0.0248 |   |
| 0.0350 | 1   | .   |                             |        |        |        |         |         |   |
| 6427   | CD  | CD  | . GLU GLU GLU B B 414 414 . | 0.2689 | 0.2507 | 0.1708 | 0.0146  | -0.0185 |   |
| 0.0626 | 1   | .   |                             |        |        |        |         |         |   |
| 6428   | OE1 | OE1 | . GLU GLU GLU B B 414 414 . | 0.3263 | 0.2879 | 0.1652 | 0.0131  | -0.0339 | - |
| 0.0230 | 1   | .   |                             |        |        |        |         |         |   |
| 6429   | OE2 | OE2 | . GLU GLU GLU B B 414 414 . | 0.3019 | 0.2618 | 0.2236 | 0.0302  | 0.0100  |   |
| 0.0752 | 1   | .   |                             |        |        |        |         |         |   |
| 6430   | C   | C   | . GLU GLU GLU B B 414 414 . | 0.2182 | 0.1672 | 0.1622 | -0.0201 | -0.0290 | - |
| 0.0053 | 1   | .   |                             |        |        |        |         |         |   |
| 6431   | O   | O   | . GLU GLU GLU B B 414 414 . | 0.2626 | 0.1913 | 0.2196 | -0.0325 | -0.0329 | - |
| 0.0067 | 1   | .   |                             |        |        |        |         |         |   |
| 6432   | N   | N   | . GLU GLU GLU B B 415 415 . | 0.2024 | 0.1746 | 0.1548 | -0.0205 | -0.0334 |   |
| 0.0013 | 1   | .   |                             |        |        |        |         |         |   |
| 6433   | CA  | CA  | . GLU GLU GLU B B 415 415 . | 0.2207 | 0.2283 | 0.1631 | -0.0293 | -0.0172 | - |
| 0.0118 | 1   | .   |                             |        |        |        |         |         |   |
| 6434   | CB  | CB  | . GLU GLU GLU B B 415 415 . | 0.2329 | 0.2322 | 0.1764 | -0.0130 | -0.0172 |   |
| 0.0117 | 1   | .   |                             |        |        |        |         |         |   |
| 6435   | CG  | CG  | . GLU GLU GLU B B 415 415 . | 0.2342 | 0.3538 | 0.1248 | -0.0811 | 0.0282  | - |
| 0.0465 | 1   | .   |                             |        |        |        |         |         |   |
| 6436   | CD  | CD  | . GLU GLU GLU B B 415 415 . | 0.3337 | 0.3288 | 0.3221 | -0.0408 | 0.0165  | - |
| 0.0256 | 1   | .   |                             |        |        |        |         |         |   |
| 6437   | OE1 | OE1 | . GLU GLU GLU B B 415 415 . | 0.3401 | 0.4285 | 0.5391 | -0.0849 | 0.0248  |   |
| 0.0377 | 1   | .   |                             |        |        |        |         |         |   |
| 6438   | OE2 | OE2 | . GLU GLU GLU B B 415 415 . | 0.5379 | 0.4899 | 0.3235 | -0.0445 | -0.0242 |   |
| 0.0084 | 1   | .   |                             |        |        |        |         |         |   |
| 6439   | C   | C   | . GLU GLU GLU B B 415 415 . | 0.2382 | 0.2372 | 0.1948 | -0.0286 | -0.0213 | - |
| 0.0065 | 1   | .   |                             |        |        |        |         |         |   |
| 6440   | O   | O   | . GLU GLU GLU B B 415 415 . | 0.2495 | 0.2721 | 0.1914 | -0.0502 | -0.0324 | - |
| 0.0079 | 1   | .   |                             |        |        |        |         |         |   |
| 6441   | N   | N   | . LEU LEU LEU B B 416 416 . | 0.2659 | 0.2277 | 0.2106 | -0.0222 | -0.0112 | - |
| 0.0165 | 1   | .   |                             |        |        |        |         |         |   |





|        |     |     |                             |        |        |        |         |         |   |
|--------|-----|-----|-----------------------------|--------|--------|--------|---------|---------|---|
| 6472   | C   | C   | . ARG ARG ARG B B 421 421 . | 0.2779 | 0.2334 | 0.2562 | -0.0107 | -0.0073 | - |
| 0.0075 | 1   | .   |                             |        |        |        |         |         |   |
| 6473   | O   | O   | . ARG ARG ARG B B 421 421 . | 0.2888 | 0.2365 | 0.2536 | -0.0172 | -0.0017 | - |
| 0.0322 | 1   | .   |                             |        |        |        |         |         |   |
| 6474   | N   | N   | . PHE PHE PHE B B 422 422 . | 0.2637 | 0.1954 | 0.2153 | 0.0018  | -0.0127 | - |
| 0.0122 | 1   | .   |                             |        |        |        |         |         |   |
| 6475   | CA  | CA  | . PHE PHE PHE B B 422 422 . | 0.2469 | 0.1807 | 0.1894 | -0.0006 | -0.0073 | - |
| 0.0013 | 1   | .   |                             |        |        |        |         |         |   |
| 6476   | CB  | CB  | . PHE PHE PHE B B 422 422 . | 0.2358 | 0.1833 | 0.1584 | 0.0099  | -0.0122 | - |
| 0.0081 | 1   | .   |                             |        |        |        |         |         |   |
| 6477   | CG  | CG  | . PHE PHE PHE B B 422 422 . | 0.2265 | 0.1707 | 0.1240 | 0.0182  | 0.0060  | - |
| 0.0149 | 1   | .   |                             |        |        |        |         |         |   |
| 6478   | CD1 | CD1 | . PHE PHE PHE B B 422 422 . | 0.2432 | 0.1441 | 0.1123 | -0.0126 | -0.0067 | - |
| 0.0169 | 1   | .   |                             |        |        |        |         |         |   |
| 6479   | CE1 | CE1 | . PHE PHE PHE B B 422 422 . | 0.1530 | 0.1298 | 0.1087 | -0.0105 | 0.0071  | - |
| 0.0153 | 1   | .   |                             |        |        |        |         |         |   |
| 6480   | CZ  | CZ  | . PHE PHE PHE B B 422 422 . | 0.1889 | 0.1721 | 0.1237 | 0.0458  | -0.0181 | - |
| 0.0318 | 1   | .   |                             |        |        |        |         |         |   |
| 6481   | CE2 | CE2 | . PHE PHE PHE B B 422 422 . | 0.2441 | 0.1874 | 0.1403 | 0.0158  | -0.0360 | - |
| 0.0057 | 1   | .   |                             |        |        |        |         |         |   |
| 6482   | CD2 | CD2 | . PHE PHE PHE B B 422 422 . | 0.1800 | 0.1717 | 0.1575 | 0.0293  | 0.0208  | - |
| 0.0095 | 1   | .   |                             |        |        |        |         |         |   |
| 6483   | C   | C   | . PHE PHE PHE B B 422 422 . | 0.2744 | 0.1639 | 0.1716 | 0.0000  | -0.0013 | - |
| 0.0108 | 1   | .   |                             |        |        |        |         |         |   |
| 6484   | O   | O   | . PHE PHE PHE B B 422 422 . | 0.3276 | 0.1541 | 0.1735 | -0.0137 | -0.0077 | - |
| 0.0093 | 1   | .   |                             |        |        |        |         |         |   |
| 6485   | N   | N   | . ALA ALA ALA B B 423 423 . | 0.2626 | 0.1374 | 0.1681 | -0.0096 | -0.0070 | - |
| 0.0033 | 1   | .   |                             |        |        |        |         |         |   |
| 6486   | CA  | CA  | . ALA ALA ALA B B 423 423 . | 0.2731 | 0.1330 | 0.1597 | -0.0099 | -0.0001 | - |
| 0.0141 | 1   | .   |                             |        |        |        |         |         |   |
| 6487   | CB  | CB  | . ALA ALA ALA B B 423 423 . | 0.2578 | 0.1239 | 0.1871 | -0.0018 | -0.0085 | - |
| 0.0010 | 1   | .   |                             |        |        |        |         |         |   |
| 6488   | C   | C   | . ALA ALA ALA B B 423 423 . | 0.2566 | 0.1485 | 0.1736 | -0.0036 | -0.0068 | - |
| 0.0007 | 1   | .   |                             |        |        |        |         |         |   |
| 6489   | O   | O   | . ALA ALA ALA B B 423 423 . | 0.2822 | 0.1484 | 0.1437 | -0.0033 | 0.0109  | - |
| 0.0142 | 1   | .   |                             |        |        |        |         |         |   |
| 6490   | N   | N   | . GLY GLY GLY B B 424 424 . | 0.2501 | 0.1364 | 0.1688 | -0.0051 | -0.0011 | - |
| 0.0074 | 1   | .   |                             |        |        |        |         |         |   |
| 6491   | CA  | CA  | . GLY GLY GLY B B 424 424 . | 0.2779 | 0.1678 | 0.1835 | 0.0008  | 0.0157  | - |
| 0.0082 | 1   | .   |                             |        |        |        |         |         |   |
| 6492   | C   | C   | . GLY GLY GLY B B 424 424 . | 0.2923 | 0.1961 | 0.1905 | -0.0068 | 0.0203  | - |
| 0.0024 | 1   | .   |                             |        |        |        |         |         |   |
| 6493   | O   | O   | . GLY GLY GLY B B 424 424 . | 0.2868 | 0.1812 | 0.1468 | -0.0067 | 0.0118  | - |
| 0.0296 | 1   | .   |                             |        |        |        |         |         |   |
| 6494   | N   | N   | . HIS HIS HIS B B 425 425 . | 0.2915 | 0.2027 | 0.1630 | 0.0024  | 0.0402  | - |
| 0.0148 | 1   | .   |                             |        |        |        |         |         |   |
| 6495   | CA  | CA  | . HIS HIS HIS B B 425 425 . | 0.3176 | 0.2159 | 0.1869 | 0.0030  | 0.0350  | - |
| 0.0132 | 1   | .   |                             |        |        |        |         |         |   |
| 6496   | CB  | CB  | . HIS HIS HIS B B 425 425 . | 0.3062 | 0.2125 | 0.1720 | 0.0203  | 0.0481  | - |
| 0.0056 | 1   | .   |                             |        |        |        |         |         |   |
| 6497   | CG  | CG  | . HIS HIS HIS B B 425 425 . | 0.3237 | 0.2984 | 0.2008 | 0.0243  | 0.0476  | - |
| 0.0200 | 1   | .   |                             |        |        |        |         |         |   |
| 6498   | ND1 | ND1 | . HIS HIS HIS B B 425 425 . | 0.3637 | 0.3432 | 0.2191 | 0.0275  | 0.0314  | - |
| 0.0033 | 1   | .   |                             |        |        |        |         |         |   |
| 6499   | CE1 | CE1 | . HIS HIS HIS B B 425 425 . | 0.3883 | 0.3621 | 0.2209 | 0.0374  | 0.0516  | - |
| 0.0062 | 1   | .   |                             |        |        |        |         |         |   |
| 6500   | NE2 | NE2 | . HIS HIS HIS B B 425 425 . | 0.4172 | 0.3867 | 0.1999 | 0.0210  | 0.0286  | - |
| 0.0022 | 1   | .   |                             |        |        |        |         |         |   |
| 6501   | CD2 | CD2 | . HIS HIS HIS B B 425 425 . | 0.3219 | 0.3013 | 0.2085 | 0.0387  | 0.0537  | - |
| 0.0367 | 1   | .   |                             |        |        |        |         |         |   |

|        |     |     |                             |        |        |        |         |         |   |
|--------|-----|-----|-----------------------------|--------|--------|--------|---------|---------|---|
| 6502   | C   | C   | . HIS HIS HIS B B 425 425 . | 0.3193 | 0.2204 | 0.1987 | -0.0009 | 0.0359  | - |
| 0.0286 | 1   | .   |                             |        |        |        |         |         |   |
| 6503   | O   | O   | . HIS HIS HIS B B 425 425 . | 0.3699 | 0.2252 | 0.2185 | -0.0148 | 0.0475  | - |
| 0.0092 | 1   | .   |                             |        |        |        |         |         |   |
| 6504   | N   | N   | . ASN ASN ASN B B 426 426 . | 0.2880 | 0.2263 | 0.1844 | -0.0024 | 0.0276  | - |
| 0.0304 | 1   | .   |                             |        |        |        |         |         |   |
| 6505   | CA  | CA  | . ASN ASN ASN B B 426 426 . | 0.3033 | 0.2480 | 0.2082 | -0.0028 | 0.0055  | - |
| 0.0246 | 1   | .   |                             |        |        |        |         |         |   |
| 6506   | CB  | CB  | . ASN ASN ASN B B 426 426 . | 0.3193 | 0.2579 | 0.2242 | -0.0183 | 0.0066  | - |
| 0.0381 | 1   | .   |                             |        |        |        |         |         |   |
| 6507   | CG  | CG  | . ASN ASN ASN B B 426 426 . | 0.4455 | 0.3205 | 0.2874 | -0.0186 | -0.0068 | - |
| 0.0672 | 1   | .   |                             |        |        |        |         |         |   |
| 6508   | OD1 | OD1 | . ASN ASN ASN B B 426 426 . | 0.5682 | 0.4791 | 0.3124 | -0.0681 | -0.0027 | - |
| 0.0905 | 1   | .   |                             |        |        |        |         |         |   |
| 6509   | ND2 | ND2 | . ASN ASN ASN B B 426 426 . | 0.5178 | 0.3123 | 0.3405 | 0.0304  | -0.0314 | - |
| 0.1125 | 1   | .   |                             |        |        |        |         |         |   |
| 6510   | C   | C   | . ASN ASN ASN B B 426 426 . | 0.2535 | 0.1937 | 0.1948 | -0.0055 | 0.0047  | - |
| 0.0082 | 1   | .   |                             |        |        |        |         |         |   |
| 6511   | O   | O   | . ASN ASN ASN B B 426 426 . | 0.2576 | 0.1936 | 0.1840 | 0.0002  | -0.0194 | - |
| 0.0030 | 1   | .   |                             |        |        |        |         |         |   |
| 6512   | N   | N   | . PHE PHE PHE B B 427 427 . | 0.2301 | 0.1648 | 0.1596 | 0.0055  | -0.0080 | - |
| 0.0167 | 1   | .   |                             |        |        |        |         |         |   |
| 6513   | CA  | CA  | . PHE PHE PHE B B 427 427 . | 0.1949 | 0.1578 | 0.1722 | 0.0235  | 0.0091  | - |
| 0.0004 | 1   | .   |                             |        |        |        |         |         |   |
| 6514   | CB  | CB  | . PHE PHE PHE B B 427 427 . | 0.1708 | 0.1285 | 0.1709 | 0.0003  | 0.0023  | - |
| 0.0065 | 1   | .   |                             |        |        |        |         |         |   |
| 6515   | CG  | CG  | . PHE PHE PHE B B 427 427 . | 0.1958 | 0.1787 | 0.1855 | 0.0023  | 0.0100  | - |
| 0.0108 | 1   | .   |                             |        |        |        |         |         |   |
| 6516   | CD1 | CD1 | . PHE PHE PHE B B 427 427 . | 0.2258 | 0.2130 | 0.2082 | 0.0055  | 0.0158  | - |
| 0.0168 | 1   | .   |                             |        |        |        |         |         |   |
| 6517   | CE1 | CE1 | . PHE PHE PHE B B 427 427 . | 0.1900 | 0.2224 | 0.2305 | 0.0144  | 0.0343  | - |
| 0.0098 | 1   | .   |                             |        |        |        |         |         |   |
| 6518   | CZ  | CZ  | . PHE PHE PHE B B 427 427 . | 0.2138 | 0.2014 | 0.1775 | 0.0332  | -0.0050 | - |
| 0.0084 | 1   | .   |                             |        |        |        |         |         |   |
| 6519   | CE2 | CE2 | . PHE PHE PHE B B 427 427 . | 0.2065 | 0.1838 | 0.1577 | -0.0104 | -0.0018 | - |
| 0.0092 | 1   | .   |                             |        |        |        |         |         |   |
| 6520   | CD2 | CD2 | . PHE PHE PHE B B 427 427 . | 0.1955 | 0.1489 | 0.1549 | -0.0318 | -0.0374 | - |
| 0.0145 | 1   | .   |                             |        |        |        |         |         |   |
| 6521   | C   | C   | . PHE PHE PHE B B 427 427 . | 0.1881 | 0.1396 | 0.1690 | 0.0089  | -0.0025 | - |
| 0.0073 | 1   | .   |                             |        |        |        |         |         |   |
| 6522   | O   | O   | . PHE PHE PHE B B 427 427 . | 0.1834 | 0.1443 | 0.1702 | 0.0080  | 0.0038  | - |
| 0.0084 | 1   | .   |                             |        |        |        |         |         |   |
| 6523   | N   | N   | . ARG ARG ARG B B 428 428 . | 0.1888 | 0.1696 | 0.1541 | 0.0068  | -0.0047 | - |
| 0.0035 | 1   | .   |                             |        |        |        |         |         |   |
| 6524   | CA  | CA  | . ARG ARG ARG B B 428 428 . | 0.1995 | 0.1518 | 0.1646 | -0.0049 | -0.0109 | - |
| 0.0054 | 1   | .   |                             |        |        |        |         |         |   |
| 6525   | CB  | CB  | . ARG ARG ARG B B 428 428 . | 0.1675 | 0.1698 | 0.1452 | -0.0011 | 0.0025  | - |
| 0.0024 | 1   | .   |                             |        |        |        |         |         |   |
| 6526   | CG  | CG  | . ARG ARG ARG B B 428 428 . | 0.1931 | 0.2084 | 0.1080 | -0.0394 | -0.0038 | - |
| 0.0367 | 1   | .   |                             |        |        |        |         |         |   |
| 6527   | CD  | CD  | . ARG ARG ARG B B 428 428 . | 0.2504 | 0.2025 | 0.1565 | 0.0043  | 0.0326  | - |
| 0.0123 | 1   | .   |                             |        |        |        |         |         |   |
| 6528   | NE  | NE  | . ARG ARG ARG B B 428 428 . | 0.2498 | 0.1760 | 0.1436 | -0.0050 | -0.0020 | - |
| 0.0003 | 1   | .   |                             |        |        |        |         |         |   |
| 6529   | CZ  | CZ  | . ARG ARG ARG B B 428 428 . | 0.1749 | 0.1251 | 0.1432 | -0.0052 | -0.0051 | - |
| 0.0129 | 1   | .   |                             |        |        |        |         |         |   |
| 6530   | NH1 | NH1 | . ARG ARG ARG B B 428 428 . | 0.1602 | 0.1477 | 0.0757 | -0.0075 | -0.0127 | - |
| 0.0423 | 1   | .   |                             |        |        |        |         |         |   |
| 6531   | NH2 | NH2 | . ARG ARG ARG B B 428 428 . | 0.2391 | 0.1629 | 0.1567 | 0.0253  | -0.0524 | - |
| 0.0071 | 1   | .   |                             |        |        |        |         |         |   |

|        |     |     |                             |        |        |        |         |         |   |
|--------|-----|-----|-----------------------------|--------|--------|--------|---------|---------|---|
| 6532   | C   | C   | . ARG ARG ARG B B 428 428 . | 0.2173 | 0.1829 | 0.2081 | 0.0030  | 0.0045  | - |
| 0.0082 | 1   | .   |                             |        |        |        |         |         |   |
| 6533   | O   | O   | . ARG ARG ARG B B 428 428 . | 0.2581 | 0.1846 | 0.2860 | 0.0122  | -0.0045 | - |
| 0.0076 | 1   | .   |                             |        |        |        |         |         |   |
| 6534   | N   | N   | . ASN ASN ASN B B 429 429 . | 0.2594 | 0.2012 | 0.2040 | -0.0202 | -0.0087 |   |
| 0.0164 | 1   | .   |                             |        |        |        |         |         |   |
| 6535   | CA  | CA  | . ASN ASN ASN B B 429 429 . | 0.2874 | 0.2368 | 0.2194 | -0.0301 | -0.0008 |   |
| 0.0117 | 1   | .   |                             |        |        |        |         |         |   |
| 6536   | CB  | CB  | . ASN ASN ASN B B 429 429 . | 0.3433 | 0.2824 | 0.2548 | -0.0207 | -0.0027 |   |
| 0.0145 | 1   | .   |                             |        |        |        |         |         |   |
| 6537   | CG  | CG  | . ASN ASN ASN B B 429 429 . | 0.3825 | 0.3017 | 0.2896 | -0.0210 | 0.0080  |   |
| 0.0111 | 1   | .   |                             |        |        |        |         |         |   |
| 6538   | OD1 | OD1 | . ASN ASN ASN B B 429 429 . | 0.4920 | 0.3458 | 0.3138 | -0.0770 | -0.0091 |   |
| 0.0331 | 1   | .   |                             |        |        |        |         |         |   |
| 6539   | ND2 | ND2 | . ASN ASN ASN B B 429 429 . | 0.3814 | 0.3234 | 0.2128 | -0.0642 | 0.0437  |   |
| 0.0261 | 1   | .   |                             |        |        |        |         |         |   |
| 6540   | C   | C   | . ASN ASN ASN B B 429 429 . | 0.3121 | 0.2450 | 0.2346 | -0.0293 | -0.0052 | - |
| 0.0060 | 1   | .   |                             |        |        |        |         |         |   |
| 6541   | O   | O   | . ASN ASN ASN B B 429 429 . | 0.3587 | 0.2638 | 0.2202 | -0.0390 | -0.0073 | - |
| 0.0037 | 1   | .   |                             |        |        |        |         |         |   |
| 6542   | N   | N   | . PRO PRO PRO B B 430 430 . | 0.3169 | 0.2507 | 0.2141 | -0.0333 | -0.0082 | - |
| 0.0097 | 1   | .   |                             |        |        |        |         |         |   |
| 6543   | CA  | CA  | . PRO PRO PRO B B 430 430 . | 0.3401 | 0.2801 | 0.2466 | -0.0355 | -0.0004 |   |
| 0.0029 | 1   | .   |                             |        |        |        |         |         |   |
| 6544   | CB  | CB  | . PRO PRO PRO B B 430 430 . | 0.3531 | 0.2756 | 0.2414 | -0.0237 | 0.0079  |   |
| 0.0015 | 1   | .   |                             |        |        |        |         |         |   |
| 6545   | CG  | CG  | . PRO PRO PRO B B 430 430 . | 0.3408 | 0.2617 | 0.1937 | -0.0388 | 0.0005  | - |
| 0.0047 | 1   | .   |                             |        |        |        |         |         |   |
| 6546   | CD  | CD  | . PRO PRO PRO B B 430 430 . | 0.3202 | 0.2281 | 0.1996 | -0.0225 | 0.0031  | - |
| 0.0160 | 1   | .   |                             |        |        |        |         |         |   |
| 6547   | C   | C   | . PRO PRO PRO B B 430 430 . | 0.3710 | 0.3273 | 0.3091 | -0.0306 | -0.0050 |   |
| 0.0003 | 1   | .   |                             |        |        |        |         |         |   |
| 6548   | O   | O   | . PRO PRO PRO B B 430 430 . | 0.3874 | 0.3285 | 0.3147 | -0.0555 | -0.0269 | - |
| 0.0075 | 1   | .   |                             |        |        |        |         |         |   |
| 6549   | N   | N   | . SER SER SER B B 431 431 . | 0.3953 | 0.3677 | 0.3447 | -0.0204 | -0.0014 |   |
| 0.0088 | 1   | .   |                             |        |        |        |         |         |   |
| 6550   | CA  | CA  | . SER SER SER B B 431 431 . | 0.4332 | 0.4266 | 0.4131 | -0.0146 | -0.0039 | - |
| 0.0067 | 1   | .   |                             |        |        |        |         |         |   |
| 6551   | CB  | CB  | . SER SER SER B B 431 431 . | 0.4383 | 0.4358 | 0.4126 | -0.0146 | -0.0060 |   |
| 0.0021 | 1   | .   |                             |        |        |        |         |         |   |
| 6552   | OG  | OG  | . SER SER SER B B 431 431 . | 0.4867 | 0.4999 | 0.4397 | -0.0137 | -0.0090 |   |
| 0.0090 | 1   | .   |                             |        |        |        |         |         |   |
| 6553   | C   | C   | . SER SER SER B B 431 431 . | 0.4605 | 0.4650 | 0.4434 | -0.0098 | -0.0028 | - |
| 0.0116 | 1   | .   |                             |        |        |        |         |         |   |
| 6554   | O   | O   | . SER SER SER B B 431 431 . | 0.4701 | 0.4718 | 0.4526 | -0.0163 | -0.0069 | - |
| 0.0216 | 1   | .   |                             |        |        |        |         |         |   |
| 6555   | N   | N   | . VAL VAL VAL B B 432 432 . | 0.4735 | 0.4939 | 0.4669 | -0.0045 | 0.0068  | - |
| 0.0105 | 1   | .   |                             |        |        |        |         |         |   |
| 6556   | CA  | CA  | . VAL VAL VAL B B 432 432 . | 0.5019 | 0.5170 | 0.4751 | -0.0077 | 0.0014  | - |
| 0.0085 | 1   | .   |                             |        |        |        |         |         |   |
| 6557   | CB  | CB  | . VAL VAL VAL B B 432 432 . | 0.5070 | 0.5290 | 0.4910 | -0.0078 | -0.0003 | - |
| 0.0062 | 1   | .   |                             |        |        |        |         |         |   |
| 6558   | CG1 | CG1 | . VAL VAL VAL B B 432 432 . | 0.5450 | 0.5284 | 0.4755 | -0.0089 | -0.0009 | - |
| 0.0086 | 1   | .   |                             |        |        |        |         |         |   |
| 6559   | CG2 | CG2 | . VAL VAL VAL B B 432 432 . | 0.5091 | 0.5397 | 0.4834 | -0.0053 | -0.0048 | - |
| 0.0032 | 1   | .   |                             |        |        |        |         |         |   |
| 6560   | C   | C   | . VAL VAL VAL B B 432 432 . | 0.5082 | 0.5309 | 0.4926 | -0.0109 | 0.0007  | - |
| 0.0029 | 1   | .   |                             |        |        |        |         |         |   |
| 6561   | O   | O   | . VAL VAL VAL B B 432 432 . | 0.5272 | 0.5540 | 0.4840 | -0.0107 | -0.0131 | - |
| 0.0166 | 1   | .   |                             |        |        |        |         |         |   |













































|        |   |   |   |     |     |     |   |   |     |     |   |        |        |        |         |         |   |
|--------|---|---|---|-----|-----|-----|---|---|-----|-----|---|--------|--------|--------|---------|---------|---|
| 7162   | O | O | . | HOH | HOH | HOH | S | . | 589 | 589 | . | 0.4440 | 0.3543 | 0.3658 | 0.0113  | 0.0903  |   |
| 0.0766 | 1 | . |   |     |     |     |   |   |     |     |   |        |        |        |         |         |   |
| 7163   | O | O | . | HOH | HOH | HOH | S | . | 590 | 590 | . | 0.5725 | 0.3275 | 0.4199 | -0.0166 | -0.0672 |   |
| 0.1781 | 1 | . |   |     |     |     |   |   |     |     |   |        |        |        |         |         |   |
| 7164   | O | O | . | HOH | HOH | HOH | S | . | 591 | 591 | . | 0.5419 | 0.5149 | 0.3519 | -0.2295 | 0.0059  |   |
| 0.0560 | 1 | . |   |     |     |     |   |   |     |     |   |        |        |        |         |         |   |
| 7165   | O | O | . | HOH | HOH | HOH | S | . | 592 | 592 | . | 0.4797 | 0.3919 | 0.3495 | -0.0120 | -0.1839 | - |
| 0.0354 | 1 | . |   |     |     |     |   |   |     |     |   |        |        |        |         |         |   |
| 7166   | O | O | . | HOH | HOH | HOH | S | . | 594 | 594 | . | 0.1094 | 0.8048 | 0.5371 | 0.0004  | -0.0323 | - |
| 0.0354 | 1 | . |   |     |     |     |   |   |     |     |   |        |        |        |         |         |   |
| 7167   | O | O | . | HOH | HOH | HOH | S | . | 595 | 595 | . | 0.4271 | 0.3830 | 0.5116 | -0.0171 | 0.0306  |   |
| 0.0827 | 1 | . |   |     |     |     |   |   |     |     |   |        |        |        |         |         |   |
| 7168   | O | O | . | HOH | HOH | HOH | S | . | 596 | 596 | . | 0.5284 | 0.7853 | 0.3361 | 0.2677  | -0.0713 |   |
| 0.0426 | 1 | . |   |     |     |     |   |   |     |     |   |        |        |        |         |         |   |
| 7169   | O | O | . | HOH | HOH | HOH | S | . | 597 | 597 | . | 0.3886 | 0.3420 | 0.2653 | 0.0252  | -0.0075 | - |
| 0.0757 | 1 | . |   |     |     |     |   |   |     |     |   |        |        |        |         |         |   |
| 7170   | O | O | . | HOH | HOH | HOH | S | . | 598 | 598 | . | 0.8460 | 0.4347 | 0.1856 | 0.0660  | 0.0716  |   |
| 0.0036 | 1 | . |   |     |     |     |   |   |     |     |   |        |        |        |         |         |   |
| 7171   | O | O | . | HOH | HOH | HOH | S | . | 599 | 599 | . | 0.5687 | 0.2309 | 0.3564 | -0.0082 | 0.1311  | - |
| 0.0255 | 1 | . |   |     |     |     |   |   |     |     |   |        |        |        |         |         |   |
| 7172   | O | O | . | HOH | HOH | HOH | S | . | 600 | 600 | . | 0.4578 | 0.9939 | 0.3824 | 0.1378  | 0.0477  | - |
| 0.2263 | 1 | . |   |     |     |     |   |   |     |     |   |        |        |        |         |         |   |
| 7173   | O | O | . | HOH | HOH | HOH | S | . | 601 | 601 | . | 0.3894 | 0.4979 | 0.3222 | 0.1552  | -0.0241 |   |
| 0.0617 | 1 | . |   |     |     |     |   |   |     |     |   |        |        |        |         |         |   |
| 7174   | O | O | . | HOH | HOH | HOH | S | . | 602 | 602 | . | 0.2223 | 0.3340 | 0.2954 | 0.0171  | -0.0762 |   |
| 0.0067 | 1 | . |   |     |     |     |   |   |     |     |   |        |        |        |         |         |   |
| 7175   | O | O | . | HOH | HOH | HOH | S | . | 603 | 603 | . | 0.3709 | 0.4577 | 0.6584 | 0.1155  | 0.1065  |   |
| 0.0351 | 1 | . |   |     |     |     |   |   |     |     |   |        |        |        |         |         |   |
| 7176   | O | O | . | HOH | HOH | HOH | S | . | 604 | 604 | . | 0.3978 | 0.2873 | 0.3951 | 0.0485  | 0.0924  |   |
| 0.0958 | 1 | . |   |     |     |     |   |   |     |     |   |        |        |        |         |         |   |
| 7177   | O | O | . | HOH | HOH | HOH | S | . | 605 | 605 | . | 0.6286 | 0.4839 | 0.3850 | -0.1870 | 0.0198  | - |
| 0.1434 | 1 | . |   |     |     |     |   |   |     |     |   |        |        |        |         |         |   |
| 7178   | O | O | . | HOH | HOH | HOH | S | . | 606 | 606 | . | 0.5086 | 0.4747 | 0.3336 | 0.1034  | -0.0812 |   |
| 0.0867 | 1 | . |   |     |     |     |   |   |     |     |   |        |        |        |         |         |   |
| 7179   | O | O | . | HOH | HOH | HOH | S | . | 607 | 607 | . | 0.3781 | 0.3348 | 0.3864 | 0.0419  | -0.0128 | - |
| 0.0193 | 1 | . |   |     |     |     |   |   |     |     |   |        |        |        |         |         |   |
| 7180   | O | O | . | HOH | HOH | HOH | S | . | 608 | 608 | . | 0.4794 | 0.5486 | 0.4394 | -0.0723 | 0.0386  | - |
| 0.0861 | 1 | . |   |     |     |     |   |   |     |     |   |        |        |        |         |         |   |
| 7181   | O | O | . | HOH | HOH | HOH | S | . | 609 | 609 | . | 0.3321 | 0.2872 | 0.3504 | -0.0533 | 0.0524  |   |
| 0.0086 | 1 | . |   |     |     |     |   |   |     |     |   |        |        |        |         |         |   |
| 7182   | O | O | . | HOH | HOH | HOH | S | . | 610 | 610 | . | 0.6104 | 0.3499 | 0.3132 | -0.0352 | -0.0550 |   |
| 0.0678 | 1 | . |   |     |     |     |   |   |     |     |   |        |        |        |         |         |   |
| 7183   | O | O | . | HOH | HOH | HOH | S | . | 612 | 612 | . | 0.6409 | 0.4298 | 0.3376 | -0.0637 | 0.0963  | - |
| 0.1885 | 1 | . |   |     |     |     |   |   |     |     |   |        |        |        |         |         |   |
| 7184   | O | O | . | HOH | HOH | HOH | S | . | 614 | 614 | . | 0.5465 | 0.6284 | 0.2836 | 0.0703  | -0.0056 | - |
| 0.1202 | 1 | . |   |     |     |     |   |   |     |     |   |        |        |        |         |         |   |
| 7185   | O | O | . | HOH | HOH | HOH | S | . | 615 | 615 | . | 0.4008 | 0.5261 | 0.5493 | -0.0688 | 0.0212  | - |
| 0.1132 | 1 | . |   |     |     |     |   |   |     |     |   |        |        |        |         |         |   |
| 7186   | O | O | . | HOH | HOH | HOH | S | . | 616 | 616 | . | 0.5369 | 0.2806 | 0.4998 | 0.0323  | -0.0386 |   |
| 0.0731 | 1 | . |   |     |     |     |   |   |     |     |   |        |        |        |         |         |   |

```

#
_atom_sites.entry_id          UNNAMED
_atom_sites.fract_transf_matrix[1][1]  0.009124
_atom_sites.fract_transf_matrix[1][2]  0.000000
_atom_sites.fract_transf_matrix[1][3]  0.000000
_atom_sites.fract_transf_matrix[2][1]  0.000000
_atom_sites.fract_transf_matrix[2][2]  0.008352
_atom_sites.fract_transf_matrix[2][3]  0.000000
_atom_sites.fract_transf_matrix[3][1]  0.000000
_atom_sites.fract_transf_matrix[3][2]  0.000000

```



```

_atom_sites.fract_transf_matrix[3][3]    0.014697
_atom_sites.fract_transf_vector[1]       0.000000
_atom_sites.fract_transf_vector[2]       0.000000
_atom_sites.fract_transf_vector[3]       0.000000
#
_cell.length_a      109.604
_cell.length_b      119.727
_cell.length_c      68.040
_cell.angle_alpha   90.000
_cell.angle_beta    90.000
_cell.angle_gamma   90.000
_cell.entry_id      UNNAMED
#
_computing.entry_id          UNNAMED
_computing.structure_refinement  'REFMAC 5.5.0109'
_computing.structure_solution   ?
_computing.pdbx_data_reduction_ds  HKL
_computing.pdbx_data_reduction_ii  HKL
_computing.cell_refinement        HKL
#
_data_extraction.software      pdb_extract
_data_extraction.extraction_date 'Fri Oct 21 15:22:49 2011'
_data_extraction.version       3.10
_data_extraction.release_date   'June 10, 2010'
_data_extraction.location       http://sw-tools.rcsb.org/apps/PDB_EXTRACT/
#
loop_
_database_2.database_id
_database_2.database_code
PDB UNNAMED
RCSB UNNAMED
#
_database_PDB_remark.id      3
_database_PDB_remark.text
;
REMARK 3
REMARK 3 REFINEMENT.
REMARK 3 PROGRAM : REFMAC 5.5.0109
REMARK 3 AUTHORS : MURSHUDOV,VAGIN,DODSON
REMARK 3
REMARK 3 REFINEMENT TARGET : MAXIMUM LIKELIHOOD
REMARK 3
REMARK 3 DATA USED IN REFINEMENT.
REMARK 3 RESOLUTION RANGE HIGH (ANGSTROMS) : 1.70
REMARK 3 RESOLUTION RANGE LOW (ANGSTROMS) : 80.84
REMARK 3 DATA CUTOFF (SIGMA(F)) : NONE
REMARK 3 COMPLETENESS FOR RANGE (%) : 96.69
REMARK 3 NUMBER OF REFLECTIONS : 90209
REMARK 3
REMARK 3 FIT TO DATA USED IN REFINEMENT.
REMARK 3 CROSS-VALIDATION METHOD : THROUGHOUT
REMARK 3 FREE R VALUE TEST SET SELECTION : RANDOM
REMARK 3 R VALUE (WORKING + TEST SET) : 0.14475
REMARK 3 R VALUE (WORKING SET) : 0.14233
REMARK 3 FREE R VALUE : 0.19127
REMARK 3 FREE R VALUE TEST SET SIZE (%) : 5.0
REMARK 3 FREE R VALUE TEST SET COUNT : 4725
REMARK 3
REMARK 3 FIT IN THE HIGHEST RESOLUTION BIN.
REMARK 3 TOTAL NUMBER OF BINS USED : 20

```

REMARK 3 BIN RESOLUTION RANGE HIGH : 1.705  
REMARK 3 BIN RESOLUTION RANGE LOW : 1.749  
REMARK 3 REFLECTION IN BIN (WORKING SET) : 5137  
REMARK 3 BIN COMPLETENESS (WORKING+TEST) (%) : 76.22  
REMARK 3 BIN R VALUE (WORKING SET) : 0.166  
REMARK 3 BIN FREE R VALUE SET COUNT : 278  
REMARK 3 BIN FREE R VALUE : 0.221  
REMARK 3  
REMARK 3 NUMBER OF NON-HYDROGEN ATOMS USED IN REFINEMENT.  
REMARK 3 ALL ATOMS : 7186  
REMARK 3  
REMARK 3 B VALUES.  
REMARK 3 FROM WILSON PLOT (A\*\*2) : NULL  
REMARK 3 MEAN B VALUE (OVERALL, A\*\*2) : 14.284  
REMARK 3 OVERALL ANISOTROPIC B VALUE.  
REMARK 3 B11 (A\*\*2) : 1.03  
REMARK 3 B22 (A\*\*2) : -0.54  
REMARK 3 B33 (A\*\*2) : -0.49  
REMARK 3 B12 (A\*\*2) : 0.00  
REMARK 3 B13 (A\*\*2) : 0.00  
REMARK 3 B23 (A\*\*2) : 0.00  
REMARK 3  
REMARK 3 ESTIMATED OVERALL COORDINATE ERROR.  
REMARK 3 ESU BASED ON R VALUE (A) : 0.132  
REMARK 3 ESU BASED ON FREE R VALUE (A) : 0.095  
REMARK 3 ESU BASED ON MAXIMUM LIKELIHOOD (A) : 0.054  
REMARK 3 ESU FOR B VALUES BASED ON MAXIMUM LIKELIHOOD (A\*\*2) : 3.526  
REMARK 3  
REMARK 3 CORRELATION COEFFICIENTS.  
REMARK 3 CORRELATION COEFFICIENT FO-FC : 0.963  
REMARK 3 CORRELATION COEFFICIENT FO-FC FREE : 0.941  
REMARK 3  
REMARK 3 RMS DEVIATIONS FROM IDEAL VALUES COUNT RMS WEIGHT  
REMARK 3 BOND LENGTHS REFINED ATOMS (A) : 6695 ; 0.027 ; 0.022  
REMARK 3 BOND ANGLES REFINED ATOMS (DEGREES) : 9067 ; 2.077 ; 1.970  
REMARK 3 TORSION ANGLES, PERIOD 1 (DEGREES) : 861 ; 6.123 ; 5.000  
REMARK 3 TORSION ANGLES, PERIOD 2 (DEGREES) : 298 ; 38.349 ; 24.966  
REMARK 3 TORSION ANGLES, PERIOD 3 (DEGREES) : 1125 ; 13.672 ; 15.000  
REMARK 3 TORSION ANGLES, PERIOD 4 (DEGREES) : 38 ; 20.551 ; 15.000  
REMARK 3 CHIRAL-CENTER RESTRAINTS (A\*\*3) : 1024 ; 0.196 ; 0.200  
REMARK 3 GENERAL PLANES REFINED ATOMS (A) : 5066 ; 0.012 ; 0.021  
REMARK 3  
REMARK 3 ISOTROPIC THERMAL FACTOR RESTRAINTS. COUNT RMS WEIGHT  
REMARK 3 MAIN-CHAIN BOND REFINED ATOMS (A\*\*2) : 4277 ; 2.041 ; 1.500  
REMARK 3 MAIN-CHAIN ANGLE REFINED ATOMS (A\*\*2) : 6829 ; 2.947 ; 2.000  
REMARK 3 SIDE-CHAIN BOND REFINED ATOMS (A\*\*2) : 2418 ; 4.849 ; 3.000  
REMARK 3 SIDE-CHAIN ANGLE REFINED ATOMS (A\*\*2) : 2238 ; 6.975 ; 4.500  
REMARK 3  
REMARK 3 ANISOTROPIC THERMAL FACTOR RESTRAINTS. COUNT RMS WEIGHT  
REMARK 3 RIGID-BOND RESTRAINTS (A\*\*2) : 6695 ; 2.754 ; 3.000  
REMARK 3  
REMARK 3 NCS RESTRAINTS STATISTICS  
REMARK 3 NUMBER OF NCS GROUPS : NULL  
REMARK 3  
REMARK 3 TWIN DETAILS  
REMARK 3 NUMBER OF TWIN DOMAINS : NULL  
REMARK 3  
REMARK 3  
REMARK 3 TLS DETAILS  
REMARK 3 NUMBER OF TLS GROUPS : NULL

```

REMARK 3
REMARK 3
REMARK 3 BULK SOLVENT MODELLING.
REMARK 3 METHOD USED : MASK
REMARK 3 PARAMETERS FOR MASK CALCULATION
REMARK 3 VDW PROBE RADIUS : 1.40
REMARK 3 ION PROBE RADIUS : 0.80
REMARK 3 SHRINKAGE RADIUS : 0.80
REMARK 3
REMARK 3 OTHER REFINEMENT REMARKS:
REMARK 3 HYDROGENS HAVE BEEN ADDED IN THE RIDING POSITIONS
REMARK 3 U VALUES : REFINED INDIVIDUALLY
REMARK 3

```

```

;
#
_entity_poly.entity_id 1
_entity_poly.pdbx_seq_one_letter_code
;SIQKIWAREILDSRGNPTVEVDLYTAKGLFRAAVPSGASTGIYEALRLDGDQRYLGKG
VLKAVDHNSTIAPALISSGLSVVEQEKLDNLMLELDGTENKSKFGANAILGVSLAVCKA
GAAERELPLYRHIAQLAGNSDLILPVPAFNIVINGGSHAGNKLAMQEFMILPVGAEFRDA
MRLGAEVYHTLKGVIKDKYGKDATNVGDEGGFAPNILENSEALELVKEAIDKAGYTEKIV
IGMDVAASEFYRDGKYDLDFKSPTDPSRYITGDQLGALYQDFVRDYPVVSIEDPFDQDDW
AAWSKFTANVGIQIVGDDLTVTNPKRIERAVEREACNCLLLKVNQIGSVTEAIQACKLAQ
ENGWGVMSHRSGETEDTFIADLVVGLCTGQIKTGAPCRSERLAKYNQLMRIEELGDEA
RFAGHNFRNPSVL
;
_entity_poly.pdbx_strand_id A,B
_entity_poly.type 'polypeptide(L)'
_entity_poly.pdbx_target_identifier ?
#
_entry.id UNNAMED
#
_exptl.crystals_number 1
_exptl.entry_id UNNAMED
_exptl.method 'X-RAY DIFFRACTION'
#
_exptl_crystal.id 1
_exptl_crystal.pdbx_mosaicity 0.435
_exptl_crystal.pdbx_mosaicity_esd ?
_exptl_crystal.density_Matthews ?
_exptl_crystal.density_diffn ?
_exptl_crystal.density_meas ?
_exptl_crystal.density_meas_temp ?
_exptl_crystal.density_percent_sol ?
_exptl_crystal.size_max ?
_exptl_crystal.size_mid ?
_exptl_crystal.size_min ?
_exptl_crystal.size_rad ?
#
_refine.entry_id UNNAMED
_refine.pdbx_refine_id 'X-RAY DIFFRACTION'
_refine.ls_d_res_high 1.7000
_refine.ls_d_res_low 80.8400
_refine.pdbx_ls_sigma_F 0.000
_refine.pdbx_data_cutoff_high_absF ?
_refine.pdbx_data_cutoff_low_absF ?
_refine.ls_percent_reflns_obs 96.6900
_refine.ls_number_reflns_obs 94934
_refine.ls_number_reflns_all ?
_refine.pdbx_ls_cross_valid_method THROUGHOUT

```

```

_refine.ls_matrix_type ?
_refine.pdbx_R_Free_selection_details RANDOM
_refine.details
' HYDROGENS HAVE BEEN ADDED IN THE RIDING POSITIONS U VALUES : REFINED
INDIVIDUALLY '
_refine.ls_R_factor_all ?
_refine.ls_R_factor_obs 0.1447
_refine.ls_R_factor_R_work 0.1423
_refine.ls_wR_factor_R_work 0.1423
_refine.ls_R_factor_R_free 0.1913
_refine.ls_wR_factor_R_free 0.1913
_refine.ls_percent_reflns_R_free 5.0000
_refine.ls_number_reflns_R_free 4725
_refine.ls_number_reflns_R_work 90209
_refine.ls_R_factor_R_free_error ?
_refine.B_iso_mean 14.4092
_refine.solvent_model_param_bsol ?
_refine.solvent_model_param_ksol ?
_refine.pdbx_isotropic_thermal_model ?
_refine.aniso_B[1][1] 1.0300
_refine.aniso_B[2][2] -0.5400
_refine.aniso_B[3][3] -0.4900
_refine.aniso_B[1][2] 0.0000
_refine.aniso_B[1][3] 0.0000
_refine.aniso_B[2][3] 0.0000
_refine.correlation_coeff_Fo_to_Fc 0.9630
_refine.correlation_coeff_Fo_to_Fc_free 0.9410
_refine.overall_SU_R_Cruickshank_DPI 0.1324
_refine.pdbx_overall_SU_R_free_Cruickshank_DPI ?
_refine.pdbx_overall_SU_R_Blow_DPI ?
_refine.pdbx_overall_SU_R_free_Blow_DPI ?
_refine.overall_SU_R_free 0.0947
_refine.pdbx_overall_ESU_R 0.1320
_refine.pdbx_overall_ESU_R_Free 0.0950
_refine.overall_SU_ML 0.0540
_refine.overall_SU_B 3.5260
_refine.solvent_model_details MASK
_refine.pdbx_solvent_vdw_probe_radii 1.4000
_refine.pdbx_solvent_ion_probe_radii 0.8000
_refine.pdbx_solvent_shrinkage_radii 0.8000
_refine.ls_number_parameters ?
_refine.ls_number_restraints ?
_refine.pdbx_starting_model ?
_refine.pdbx_method_to_determine_struct ?
_refine.pdbx_stereochemistry_target_values 'MAXIMUM LIKELIHOOD'
_refine.pdbx_stereochem_target_val_spec_case ?
_refine.overall_FOM_work_R_set 0.9036
_refine.B_iso_max 53.390
_refine.B_iso_min 3.550
_refine.pdbx_overall_phase_error ?
_refine.occupancy_max 1.000
_refine.occupancy_min 0.500
#
loop_
_refine_ls_restr.pdbx_refine_id
_refine_ls_restr.type
_refine_ls_restr.number
_refine_ls_restr.dev_ideal
_refine_ls_restr.dev_ideal_target
_refine_ls_restr.weight

```

```

_refine_ls_restr.pdbx_restraint_function
'X-RAY DIFFRACTION' r_bond_refined_d      6695 0.027 0.022 ? ?
'X-RAY DIFFRACTION' r_angle_refined_deg   9067 2.077 1.970 ? ?
'X-RAY DIFFRACTION' r_dihedral_angle_1_deg 861 6.123 5.000 ? ?
'X-RAY DIFFRACTION' r_dihedral_angle_2_deg 298 38.349 24.966 ? ?
'X-RAY DIFFRACTION' r_dihedral_angle_3_deg 1125 13.672 15.000 ? ?
'X-RAY DIFFRACTION' r_dihedral_angle_4_deg 38 20.551 15.000 ? ?
'X-RAY DIFFRACTION' r_chiral_restr       1024 0.196 0.200 ? ?
'X-RAY DIFFRACTION' r_gen_planes_refined  5066 0.012 0.021 ? ?
'X-RAY DIFFRACTION' r_mcbond_it          4277 2.041 1.500 ? ?
'X-RAY DIFFRACTION' r_mcbond_it          6829 2.947 2.000 ? ?
'X-RAY DIFFRACTION' r_scbond_it          2418 4.849 3.000 ? ?
'X-RAY DIFFRACTION' r_scangle_it         2238 6.975 4.500 ? ?
'X-RAY DIFFRACTION' r_rigid_bond_restr   6695 2.754 3.000 ? ?
#
_refine_ls_shell.d_res_high               1.7050
_refine_ls_shell.d_res_low                1.7490
_refine_ls_shell.pdbx_total_number_of_bins_used 20
_refine_ls_shell.percent_reflns_obs      76.2200
_refine_ls_shell.number_reflns_R_work    5137
_refine_ls_shell.R_factor_all            ?
_refine_ls_shell.R_factor_R_work         0.1660
_refine_ls_shell.R_factor_R_free         0.2210
_refine_ls_shell.percent_reflns_R_free   ?
_refine_ls_shell.number_reflns_R_free    278
_refine_ls_shell.R_factor_R_free_error   ?
_refine_ls_shell.number_reflns_all       5415
_refine_ls_shell.number_reflns_obs       ?
_refine_ls_shell.pdbx_refine_id          'X-RAY DIFFRACTION'
#
_reflns.entry_id                          UNNAMED
_reflns.d_resolution_high                  1.700
_reflns.d_resolution_low                   50.000
_reflns.pdbx_number_measured_all          555923
_reflns.number_obs                         94960
_reflns.pdbx_Rmerge_I_obs                  0.051
_reflns.pdbx_netI_over_av_sigmaI          37.571
_reflns.pdbx_netI_over_sigmaI             16.400
_reflns.pdbx_chi_squared                   1.351
_reflns.pdbx_redundancy                   5.900
_reflns.percent_possible_obs              96.800
_reflns.pdbx_Rmeas_mean                    0.051
_reflns.pdbx_average_I_obs                 3787.200
_reflns.pdbx_average_sigmaI_obs           100.800
#
loop_
_reflns_shell.d_res_high
_reflns_shell.d_res_low
_reflns_shell.number_measured_obs
_reflns_shell.number_measured_all
_reflns_shell.number_unique_obs
_reflns_shell.pdbx_rejects
_reflns_shell.Rmerge_I_obs
_reflns_shell.meanI_over_sigI_obs
_reflns_shell.pdbx_Rsym_value
_reflns_shell.pdbx_chi_squared
_reflns_shell.pdbx_redundancy
_reflns_shell.percent_possible_obs
_reflns_shell.pdbx_Rmeas_mean
_reflns_shell.pdbx_netI_over_sigmaI_obs

```

```

_reflns_shell.pdbx_number_centric
_reflns_shell.pdbx_number_anomalous
_reflns_shell.pdbx_Rmerge_I_anomalous
_reflns_shell.pdbx_meanI_over_sigI_anomalous
_reflns_shell.pdbx_PCV_mean
_reflns_shell.number_possible
_reflns_shell.number_unique_all
_reflns_shell.Rmerge_F_all
_reflns_shell.Rmerge_F_obs
_reflns_shell.Rmerge_I_all
_reflns_shell.meanI_over_sigI_all
_reflns_shell.percent_possible_all
_reflns_shell.pdbx_Rrim_I_all
_reflns_shell.pdbx_Rpim_I_all
1.700 1.760 ? ? ? ? 0.156 ? ? 0.832 4.000 ? ? ? ? ? ? ? ? ? ? 7763 ? ? ? ? 80.100 ? ?
1.760 1.830 ? ? ? ? 0.135 ? ? 0.897 4.700 ? ? ? ? ? ? ? ? ? ? 9282 ? ? ? ? 95.700 ? ?
1.830 1.910 ? ? ? ? 0.112 ? ? 0.927 5.700 ? ? ? ? ? ? ? ? ? ? 9596 ? ? ? ? 99.100 ? ?
1.910 2.020 ? ? ? ? 0.086 ? ? 0.990 5.900 ? ? ? ? ? ? ? ? ? ? 9661 ? ? ? ? 99.400 ? ?
2.020 2.140 ? ? ? ? 0.069 ? ? 1.100 6.100 ? ? ? ? ? ? ? ? ? ? 9675 ? ? ? ? 99.500 ? ?
2.140 2.310 ? ? ? ? 0.057 ? ? 1.197 6.300 ? ? ? ? ? ? ? ? ? ? 9730 ? ? ? ? 99.700 ? ?
2.310 2.540 ? ? ? ? 0.051 ? ? 1.297 6.400 ? ? ? ? ? ? ? ? ? ? 9767 ? ? ? ? 99.700 ? ?
2.540 2.910 ? ? ? ? 0.045 ? ? 1.453 6.500 ? ? ? ? ? ? ? ? ? ? 9762 ? ? ? ? 99.600 ? ?
2.910 3.660 ? ? ? ? 0.047 ? ? 2.175 6.400 ? ? ? ? ? ? ? ? ? ? 9830 ? ? ? ? 99.000 ? ?
3.660 50.000 ? ? ? ? 0.039 ? ? 2.085 6.300 ? ? ? ? ? ? ? ? ? ? 9894 ? ? ? ? 96.400 ? ?
#
loop_
_software.pdbx_ordinal
_software.name
_software.version
_software.date
_software.type
_software.contact_author
_software.contact_author_email
_software.classification
_software.location
_software.language
1 HKL ? ? package 'Zbyszek Otwinowski' hkl@hkl-xray.com
'data reduction' http://www.hkl-xray.com/ ?
2 REFMAC5 ? ? program 'Garib N. Murshudov' garib@ysbl.york.ac.uk
refinement http://www.ccp4.ac.uk/dist/html/refmac5.html Fortran_77
3 pdb_extract 3.10 'June 10, 2010' package PDB
deposit@deposit.rcsb.org
'data extraction' http://sw-tools.pdb.org/apps/PDB_EXTRACT/ C++
#
_struct_biol.id 1
_struct_biol.details ?
#
_symmetry.space_group_name_H-M 'P 21 21 2'
_symmetry.entry_id UNNAMED
_symmetry.Int_Tables_number 18
#

```

## CIF File(s) (REQUIRED if paper describes X-ray crystal structures)

data\_UNNAMED

#

loop\_

\_atom\_site.group\_PDB

\_atom\_site.id

\_atom\_site.auth\_atom\_id

\_atom\_site.label\_atom\_id

\_atom\_site.label\_alt\_id

\_atom\_site.auth\_comp\_id

\_atom\_site.label\_comp\_id

\_atom\_site.pdbx\_auth\_comp\_id

\_atom\_site.auth\_asym\_id

\_atom\_site.label\_asym\_id

\_atom\_site.auth\_seq\_id

\_atom\_site.label\_seq\_id

\_atom\_site.pdbx\_PDB\_ins\_code

\_atom\_site.Cartn\_x

\_atom\_site.Cartn\_y

\_atom\_site.Cartn\_z

\_atom\_site.occupancy

\_atom\_site.B\_iso\_or\_equiv

\_atom\_site.pdbx\_PDB\_model\_num

\_atom\_site.label\_entity\_id

\_atom\_site.type\_symbol

|        |   |   |   |     |     |     |   |   |   |   |   |         |        |        |      |       |
|--------|---|---|---|-----|-----|-----|---|---|---|---|---|---------|--------|--------|------|-------|
| ATOM 1 | N | N | . | SER | SER | SER | A | A | 1 | 1 | . | 115.859 | 75.866 | 21.949 | 1.00 | 18.10 |
|--------|---|---|---|-----|-----|-----|---|---|---|---|---|---------|--------|--------|------|-------|

1 . .

|        |    |    |   |     |     |     |   |   |   |   |   |         |        |        |      |       |
|--------|----|----|---|-----|-----|-----|---|---|---|---|---|---------|--------|--------|------|-------|
| ATOM 2 | CA | CA | . | SER | SER | SER | A | A | 1 | 1 | . | 117.061 | 75.248 | 21.331 | 1.00 | 17.79 |
|--------|----|----|---|-----|-----|-----|---|---|---|---|---|---------|--------|--------|------|-------|

1 . .

|        |    |    |   |     |     |     |   |   |   |   |   |         |        |        |      |       |
|--------|----|----|---|-----|-----|-----|---|---|---|---|---|---------|--------|--------|------|-------|
| ATOM 3 | CB | CB | . | SER | SER | SER | A | A | 1 | 1 | . | 116.827 | 73.787 | 20.974 | 1.00 | 19.68 |
|--------|----|----|---|-----|-----|-----|---|---|---|---|---|---------|--------|--------|------|-------|

1 . .

|        |    |    |   |     |     |     |   |   |   |   |   |         |        |        |      |       |
|--------|----|----|---|-----|-----|-----|---|---|---|---|---|---------|--------|--------|------|-------|
| ATOM 4 | OG | OG | . | SER | SER | SER | A | A | 1 | 1 | . | 115.762 | 73.731 | 20.076 | 1.00 | 23.06 |
|--------|----|----|---|-----|-----|-----|---|---|---|---|---|---------|--------|--------|------|-------|

1 . .

|        |   |   |   |     |     |     |   |   |   |   |   |         |        |        |      |       |
|--------|---|---|---|-----|-----|-----|---|---|---|---|---|---------|--------|--------|------|-------|
| ATOM 5 | C | C | . | SER | SER | SER | A | A | 1 | 1 | . | 117.551 | 76.046 | 20.085 | 1.00 | 17.86 |
|--------|---|---|---|-----|-----|-----|---|---|---|---|---|---------|--------|--------|------|-------|

1 . .

|        |   |   |   |     |     |     |   |   |   |   |   |         |        |        |      |       |
|--------|---|---|---|-----|-----|-----|---|---|---|---|---|---------|--------|--------|------|-------|
| ATOM 6 | O | O | . | SER | SER | SER | A | A | 1 | 1 | . | 116.879 | 76.964 | 19.530 | 1.00 | 18.38 |
|--------|---|---|---|-----|-----|-----|---|---|---|---|---|---------|--------|--------|------|-------|

1 . .

|        |   |   |   |     |     |     |   |   |   |   |   |         |        |        |      |       |
|--------|---|---|---|-----|-----|-----|---|---|---|---|---|---------|--------|--------|------|-------|
| ATOM 7 | N | N | . | ILE | ILE | ILE | A | A | 2 | 2 | . | 118.806 | 75.749 | 19.742 | 1.00 | 13.93 |
|--------|---|---|---|-----|-----|-----|---|---|---|---|---|---------|--------|--------|------|-------|

1 . .

|        |    |    |   |     |     |     |   |   |   |   |   |         |        |        |      |       |
|--------|----|----|---|-----|-----|-----|---|---|---|---|---|---------|--------|--------|------|-------|
| ATOM 8 | CA | CA | . | ILE | ILE | ILE | A | A | 2 | 2 | . | 119.407 | 76.403 | 18.576 | 1.00 | 12.02 |
|--------|----|----|---|-----|-----|-----|---|---|---|---|---|---------|--------|--------|------|-------|

1 . .

|        |    |    |   |     |     |     |   |   |   |   |   |         |        |        |      |       |
|--------|----|----|---|-----|-----|-----|---|---|---|---|---|---------|--------|--------|------|-------|
| ATOM 9 | CB | CB | . | ILE | ILE | ILE | A | A | 2 | 2 | . | 120.917 | 76.179 | 18.598 | 1.00 | 11.94 |
|--------|----|----|---|-----|-----|-----|---|---|---|---|---|---------|--------|--------|------|-------|

1 . .

|         |     |     |   |     |     |     |   |   |   |   |   |         |        |        |      |       |
|---------|-----|-----|---|-----|-----|-----|---|---|---|---|---|---------|--------|--------|------|-------|
| ATOM 10 | CG1 | CG1 | . | ILE | ILE | ILE | A | A | 2 | 2 | . | 121.552 | 76.811 | 19.871 | 1.00 | 12.62 |
|---------|-----|-----|---|-----|-----|-----|---|---|---|---|---|---------|--------|--------|------|-------|

1 . .

|         |    |    |   |     |     |     |   |   |   |   |   |         |        |        |      |       |
|---------|----|----|---|-----|-----|-----|---|---|---|---|---|---------|--------|--------|------|-------|
| ATOM 11 | CD | CD | . | ILE | ILE | ILE | A | A | 2 | 2 | . | 122.954 | 76.298 | 20.211 | 1.00 | 16.39 |
|---------|----|----|---|-----|-----|-----|---|---|---|---|---|---------|--------|--------|------|-------|

1 . .

|         |     |     |   |     |     |     |   |   |   |   |   |         |        |        |      |       |
|---------|-----|-----|---|-----|-----|-----|---|---|---|---|---|---------|--------|--------|------|-------|
| ATOM 12 | CG2 | CG2 | . | ILE | ILE | ILE | A | A | 2 | 2 | . | 121.514 | 76.654 | 17.335 | 1.00 | 12.53 |
|---------|-----|-----|---|-----|-----|-----|---|---|---|---|---|---------|--------|--------|------|-------|

1 . .

|         |   |   |   |     |     |     |   |   |   |   |   |         |        |        |      |       |
|---------|---|---|---|-----|-----|-----|---|---|---|---|---|---------|--------|--------|------|-------|
| ATOM 13 | C | C | . | ILE | ILE | ILE | A | A | 2 | 2 | . | 118.816 | 75.762 | 17.325 | 1.00 | 11.88 |
|---------|---|---|---|-----|-----|-----|---|---|---|---|---|---------|--------|--------|------|-------|

1 . .

|         |   |   |   |     |     |     |   |   |   |   |   |         |        |        |      |       |
|---------|---|---|---|-----|-----|-----|---|---|---|---|---|---------|--------|--------|------|-------|
| ATOM 14 | O | O | . | ILE | ILE | ILE | A | A | 2 | 2 | . | 118.714 | 74.500 | 17.247 | 1.00 | 14.42 |
|---------|---|---|---|-----|-----|-----|---|---|---|---|---|---------|--------|--------|------|-------|

1 . .

|         |   |   |   |     |     |     |   |   |   |   |   |         |        |        |      |       |
|---------|---|---|---|-----|-----|-----|---|---|---|---|---|---------|--------|--------|------|-------|
| ATOM 15 | N | N | . | GLN | GLN | GLN | A | A | 3 | 3 | . | 118.358 | 76.599 | 16.378 | 1.00 | 11.77 |
|---------|---|---|---|-----|-----|-----|---|---|---|---|---|---------|--------|--------|------|-------|

1 . .

|         |    |    |   |     |     |     |   |   |   |   |   |         |        |        |      |       |
|---------|----|----|---|-----|-----|-----|---|---|---|---|---|---------|--------|--------|------|-------|
| ATOM 16 | CA | CA | . | GLN | GLN | GLN | A | A | 3 | 3 | . | 117.776 | 76.118 | 15.117 | 1.00 | 13.48 |
|---------|----|----|---|-----|-----|-----|---|---|---|---|---|---------|--------|--------|------|-------|

1 . .

|         |    |    |   |     |     |     |   |   |   |   |   |         |        |        |      |       |
|---------|----|----|---|-----|-----|-----|---|---|---|---|---|---------|--------|--------|------|-------|
| ATOM 17 | CB | CB | . | GLN | GLN | GLN | A | A | 3 | 3 | . | 116.709 | 77.064 | 14.592 | 1.00 | 15.48 |
|---------|----|----|---|-----|-----|-----|---|---|---|---|---|---------|--------|--------|------|-------|

1 . .

|         |    |    |   |     |     |     |   |   |   |   |   |         |        |        |      |       |
|---------|----|----|---|-----|-----|-----|---|---|---|---|---|---------|--------|--------|------|-------|
| ATOM 18 | CG | CG | . | GLN | GLN | GLN | A | A | 3 | 3 | . | 115.549 | 77.179 | 15.522 | 1.00 | 18.45 |
|---------|----|----|---|-----|-----|-----|---|---|---|---|---|---------|--------|--------|------|-------|

1 . .









|          |     |     |               |           |                         |            |
|----------|-----|-----|---------------|-----------|-------------------------|------------|
| ATOM 109 | O   | O   | . SER SER SER | A A 13 13 | . 141.828 97.388 10.102 | 1.00 6.91  |
| 1 . .    |     |     |               |           |                         |            |
| ATOM 110 | N   | N   | . ARG ARG ARG | A A 14 14 | . 142.331 95.124 10.289 | 1.00 6.68  |
| 1 . .    |     |     |               |           |                         |            |
| ATOM 111 | CA  | CA  | . ARG ARG ARG | A A 14 14 | . 143.617 95.265 9.551  | 1.00 5.87  |
| 1 . .    |     |     |               |           |                         |            |
| ATOM 112 | CB  | CB  | . ARG ARG ARG | A A 14 14 | . 144.817 94.554 10.358 | 1.00 10.14 |
| 1 . .    |     |     |               |           |                         |            |
| ATOM 113 | CG  | CG  | . ARG ARG ARG | A A 14 14 | . 145.474 95.459 11.369 | 1.00 12.15 |
| 1 . .    |     |     |               |           |                         |            |
| ATOM 114 | CD  | CD  | . ARG ARG ARG | A A 14 14 | . 146.678 94.756 12.037 | 1.00 12.65 |
| 1 . .    |     |     |               |           |                         |            |
| ATOM 115 | NE  | NE  | . ARG ARG ARG | A A 14 14 | . 146.226 93.660 12.879 | 1.00 12.17 |
| 1 . .    |     |     |               |           |                         |            |
| ATOM 116 | CZ  | CZ  | . ARG ARG ARG | A A 14 14 | . 146.408 93.635 14.193 | 1.00 8.64  |
| 1 . .    |     |     |               |           |                         |            |
| ATOM 117 | NH1 | NH1 | . ARG ARG ARG | A A 14 14 | . 147.071 94.638 14.779 | 1.00 10.37 |
| 1 . .    |     |     |               |           |                         |            |
| ATOM 118 | NH2 | NH2 | . ARG ARG ARG | A A 14 14 | . 145.959 92.592 14.846 | 1.00 11.11 |
| 1 . .    |     |     |               |           |                         |            |
| ATOM 119 | C   | C   | . ARG ARG ARG | A A 14 14 | . 143.492 94.600 8.193  | 1.00 7.95  |
| 1 . .    |     |     |               |           |                         |            |
| ATOM 120 | O   | O   | . ARG ARG ARG | A A 14 14 | . 144.494 94.526 7.484  | 1.00 10.11 |
| 1 . .    |     |     |               |           |                         |            |
| ATOM 121 | N   | N   | . GLY GLY GLY | A A 15 15 | . 142.323 94.099 7.865  | 1.00 7.18  |
| 1 . .    |     |     |               |           |                         |            |
| ATOM 122 | CA  | CA  | . GLY GLY GLY | A A 15 15 | . 142.139 93.484 6.553  | 1.00 7.84  |
| 1 . .    |     |     |               |           |                         |            |
| ATOM 123 | C   | C   | . GLY GLY GLY | A A 15 15 | . 142.449 91.975 6.575  | 1.00 6.26  |
| 1 . .    |     |     |               |           |                         |            |
| ATOM 124 | O   | O   | . GLY GLY GLY | A A 15 15 | . 142.650 91.386 5.495  | 1.00 8.64  |
| 1 . .    |     |     |               |           |                         |            |
| ATOM 125 | N   | N   | . ASN ASN ASN | A A 16 16 | . 142.603 91.380 7.770  | 1.00 7.42  |
| 1 . .    |     |     |               |           |                         |            |
| ATOM 126 | CA  | CA  | . ASN ASN ASN | A A 16 16 | . 142.879 89.935 7.887  | 1.00 8.31  |
| 1 . .    |     |     |               |           |                         |            |
| ATOM 127 | CB  | CB  | . ASN ASN ASN | A A 16 16 | . 143.926 89.685 8.981  | 1.00 8.77  |
| 1 . .    |     |     |               |           |                         |            |
| ATOM 128 | CG  | CG  | . ASN ASN ASN | A A 16 16 | . 145.249 90.300 8.656  | 1.00 9.31  |
| 1 . .    |     |     |               |           |                         |            |
| ATOM 129 | OD1 | OD1 | . ASN ASN ASN | A A 16 16 | . 145.722 90.189 7.528  | 1.00 11.69 |
| 1 . .    |     |     |               |           |                         |            |
| ATOM 130 | ND2 | ND2 | . ASN ASN ASN | A A 16 16 | . 145.807 91.023 9.616  | 1.00 12.05 |
| 1 . .    |     |     |               |           |                         |            |
| ATOM 131 | C   | C   | . ASN ASN ASN | A A 16 16 | . 141.631 89.151 8.175  | 1.00 6.99  |
| 1 . .    |     |     |               |           |                         |            |
| ATOM 132 | O   | O   | . ASN ASN ASN | A A 16 16 | . 140.734 89.599 8.834  | 1.00 6.71  |
| 1 . .    |     |     |               |           |                         |            |
| ATOM 133 | N   | N   | . PRO PRO PRO | A A 17 17 | . 141.543 87.926 7.638  | 1.00 7.68  |
| 1 . .    |     |     |               |           |                         |            |
| ATOM 134 | CA  | CA  | . PRO PRO PRO | A A 17 17 | . 140.324 87.104 7.910  | 1.00 6.45  |
| 1 . .    |     |     |               |           |                         |            |
| ATOM 135 | CB  | CB  | . PRO PRO PRO | A A 17 17 | . 140.666 85.771 7.247  | 1.00 7.63  |
| 1 . .    |     |     |               |           |                         |            |
| ATOM 136 | CG  | CG  | . PRO PRO PRO | A A 17 17 | . 141.590 86.176 6.102  | 1.00 7.80  |
| 1 . .    |     |     |               |           |                         |            |
| ATOM 137 | CD  | CD  | . PRO PRO PRO | A A 17 17 | . 142.494 87.227 6.769  | 1.00 7.12  |
| 1 . .    |     |     |               |           |                         |            |
| ATOM 138 | C   | C   | . PRO PRO PRO | A A 17 17 | . 140.113 86.849 9.405  | 1.00 6.24  |
| 1 . .    |     |     |               |           |                         |            |







|          |     |     |               |           |                         |            |
|----------|-----|-----|---------------|-----------|-------------------------|------------|
| ATOM 229 | C   | C   | . LEU LEU LEU | A A 29 29 | . 120.253 86.619 14.882 | 1.00 12.73 |
| 1 . .    |     |     |               |           |                         |            |
| ATOM 230 | O   | O   | . LEU LEU LEU | A A 29 29 | . 120.039 87.810 15.104 | 1.00 15.57 |
| 1 . .    |     |     |               |           |                         |            |
| ATOM 231 | N   | N   | . PHE PHE PHE | A A 30 30 | . 121.280 86.014 15.410 | 1.00 10.42 |
| 1 . .    |     |     |               |           |                         |            |
| ATOM 232 | CA  | CA  | . PHE PHE PHE | A A 30 30 | . 122.206 86.671 16.326 | 1.00 10.01 |
| 1 . .    |     |     |               |           |                         |            |
| ATOM 233 | CB  | CB  | . PHE PHE PHE | A A 30 30 | . 122.055 86.065 17.712 | 1.00 10.67 |
| 1 . .    |     |     |               |           |                         |            |
| ATOM 234 | CG  | CG  | . PHE PHE PHE | A A 30 30 | . 120.680 86.242 18.197 | 1.00 10.74 |
| 1 . .    |     |     |               |           |                         |            |
| ATOM 235 | CD1 | CD1 | . PHE PHE PHE | A A 30 30 | . 120.318 87.493 18.698 | 1.00 12.26 |
| 1 . .    |     |     |               |           |                         |            |
| ATOM 236 | CE1 | CE1 | . PHE PHE PHE | A A 30 30 | . 118.965 87.731 19.025 | 1.00 13.59 |
| 1 . .    |     |     |               |           |                         |            |
| ATOM 237 | CZ  | CZ  | . PHE PHE PHE | A A 30 30 | . 118.003 86.711 18.861 | 1.00 13.93 |
| 1 . .    |     |     |               |           |                         |            |
| ATOM 238 | CE2 | CE2 | . PHE PHE PHE | A A 30 30 | . 118.375 85.503 18.302 | 1.00 13.10 |
| 1 . .    |     |     |               |           |                         |            |
| ATOM 239 | CD2 | CD2 | . PHE PHE PHE | A A 30 30 | . 119.729 85.275 18.031 | 1.00 12.15 |
| 1 . .    |     |     |               |           |                         |            |
| ATOM 240 | C   | C   | . PHE PHE PHE | A A 30 30 | . 123.628 86.464 15.735 | 1.00 10.73 |
| 1 . .    |     |     |               |           |                         |            |
| ATOM 241 | O   | O   | . PHE PHE PHE | A A 30 30 | . 123.961 85.332 15.321 | 1.00 14.86 |
| 1 . .    |     |     |               |           |                         |            |
| ATOM 242 | N   | N   | . ARG ARG ARG | A A 31 31 | . 124.456 87.492 15.804 | 1.00 8.87  |
| 1 . .    |     |     |               |           |                         |            |
| ATOM 243 | CA  | CA  | . ARG ARG ARG | A A 31 31 | . 125.722 87.451 15.072 | 1.00 8.22  |
| 1 . .    |     |     |               |           |                         |            |
| ATOM 244 | CB  | CB  | . ARG ARG ARG | A A 31 31 | . 125.637 88.314 13.773 | 1.00 9.30  |
| 1 . .    |     |     |               |           |                         |            |
| ATOM 245 | CG  | CG  | . ARG ARG ARG | A A 31 31 | . 126.895 88.289 12.933 | 1.00 9.30  |
| 1 . .    |     |     |               |           |                         |            |
| ATOM 246 | CD  | CD  | . ARG ARG ARG | A A 31 31 | . 126.729 89.149 11.770 | 1.00 11.81 |
| 1 . .    |     |     |               |           |                         |            |
| ATOM 247 | NE  | NE  | . ARG ARG ARG | A A 31 31 | . 125.658 88.762 10.899 | 1.00 11.10 |
| 1 . .    |     |     |               |           |                         |            |
| ATOM 248 | CZ  | CZ  | . ARG ARG ARG | A A 31 31 | . 124.946 89.703 10.225 | 1.00 13.86 |
| 1 . .    |     |     |               |           |                         |            |
| ATOM 249 | NH1 | NH1 | . ARG ARG ARG | A A 31 31 | . 125.242 91.016 10.358 | 1.00 15.18 |
| 1 . .    |     |     |               |           |                         |            |
| ATOM 250 | NH2 | NH2 | . ARG ARG ARG | A A 31 31 | . 123.955 89.359 9.450  | 1.00 17.21 |
| 1 . .    |     |     |               |           |                         |            |
| ATOM 251 | C   | C   | . ARG ARG ARG | A A 31 31 | . 126.831 87.924 15.950 | 1.00 7.53  |
| 1 . .    |     |     |               |           |                         |            |
| ATOM 252 | O   | O   | . ARG ARG ARG | A A 31 31 | . 126.655 88.935 16.627 | 1.00 9.75  |
| 1 . .    |     |     |               |           |                         |            |
| ATOM 253 | N   | N   | . ALA ALA ALA | A A 32 32 | . 127.980 87.236 15.916 | 1.00 7.36  |
| 1 . .    |     |     |               |           |                         |            |
| ATOM 254 | CA  | CA  | . ALA ALA ALA | A A 32 32 | . 129.169 87.683 16.650 | 1.00 6.45  |
| 1 . .    |     |     |               |           |                         |            |
| ATOM 255 | CB  | CB  | . ALA ALA ALA | A A 32 32 | . 129.302 86.947 18.013 | 1.00 9.00  |
| 1 . .    |     |     |               |           |                         |            |
| ATOM 256 | C   | C   | . ALA ALA ALA | A A 32 32 | . 130.400 87.447 15.842 | 1.00 6.89  |
| 1 . .    |     |     |               |           |                         |            |
| ATOM 257 | O   | O   | . ALA ALA ALA | A A 32 32 | . 130.425 86.567 14.998 | 1.00 8.30  |
| 1 . .    |     |     |               |           |                         |            |
| ATOM 258 | N   | N   | . ALA ALA ALA | A A 33 33 | . 131.445 88.187 16.111 | 1.00 6.97  |
| 1 . .    |     |     |               |           |                         |            |









|          |     |     |                         |                                    |
|----------|-----|-----|-------------------------|------------------------------------|
| ATOM 349 | C   | C   | . LEU LEU LEU A A 46 46 | . 144.398 79.446 18.952 1.00 10.14 |
| 1 . .    |     |     |                         |                                    |
| ATOM 350 | O   | O   | . LEU LEU LEU A A 46 46 | . 143.191 79.204 18.952 1.00 10.51 |
| 1 . .    |     |     |                         |                                    |
| ATOM 351 | N   | N   | . GLU GLU GLU A A 47 47 | . 144.937 80.360 18.171 1.00 9.44  |
| 1 . .    |     |     |                         |                                    |
| ATOM 352 | CA  | CA  | . GLU GLU GLU A A 47 47 | . 144.158 80.965 17.065 1.00 8.32  |
| 1 . .    |     |     |                         |                                    |
| ATOM 353 | CB  | CB  | . GLU GLU GLU A A 47 47 | . 144.637 82.428 16.856 1.00 9.38  |
| 1 . .    |     |     |                         |                                    |
| ATOM 354 | CG  | CG  | . GLU GLU GLU A A 47 47 | . 143.982 83.104 15.657 1.00 8.97  |
| 1 . .    |     |     |                         |                                    |
| ATOM 355 | CD  | CD  | . GLU GLU GLU A A 47 47 | . 144.505 84.486 15.518 1.00 10.73 |
| 1 . .    |     |     |                         |                                    |
| ATOM 356 | OE1 | OE1 | . GLU GLU GLU A A 47 47 | . 143.918 85.389 16.168 1.00 11.29 |
| 1 . .    |     |     |                         |                                    |
| ATOM 357 | OE2 | OE2 | . GLU GLU GLU A A 47 47 | . 145.581 84.687 14.864 1.00 11.77 |
| 1 . .    |     |     |                         |                                    |
| ATOM 358 | C   | C   | . GLU GLU GLU A A 47 47 | . 144.455 80.142 15.813 1.00 7.91  |
| 1 . .    |     |     |                         |                                    |
| ATOM 359 | O   | O   | . GLU GLU GLU A A 47 47 | . 145.608 80.099 15.328 1.00 10.27 |
| 1 . .    |     |     |                         |                                    |
| ATOM 360 | N   | N   | . LEU LEU LEU A A 48 48 | . 143.457 79.434 15.335 1.00 7.88  |
| 1 . .    |     |     |                         |                                    |
| ATOM 361 | CA  | CA  | . LEU LEU LEU A A 48 48 | . 143.665 78.500 14.216 1.00 8.17  |
| 1 . .    |     |     |                         |                                    |
| ATOM 362 | CB  | CB  | . LEU LEU LEU A A 48 48 | . 142.611 77.374 14.293 1.00 10.13 |
| 1 . .    |     |     |                         |                                    |
| ATOM 363 | CG  | CG  | . LEU LEU LEU A A 48 48 | . 142.719 76.336 13.152 1.00 9.55  |
| 1 . .    |     |     |                         |                                    |
| ATOM 364 | CD1 | CD1 | . LEU LEU LEU A A 48 48 | . 144.095 75.604 13.250 1.00 12.78 |
| 1 . .    |     |     |                         |                                    |
| ATOM 365 | CD2 | CD2 | . LEU LEU LEU A A 48 48 | . 141.517 75.368 13.242 1.00 10.98 |
| 1 . .    |     |     |                         |                                    |
| ATOM 366 | C   | C   | . LEU LEU LEU A A 48 48 | . 143.581 79.281 12.893 1.00 8.71  |
| 1 . .    |     |     |                         |                                    |
| ATOM 367 | O   | O   | . LEU LEU LEU A A 48 48 | . 142.503 79.799 12.563 1.00 9.30  |
| 1 . .    |     |     |                         |                                    |
| ATOM 368 | N   | N   | . ARG ARG ARG A A 49 49 | . 144.670 79.263 12.119 1.00 10.80 |
| 1 . .    |     |     |                         |                                    |
| ATOM 369 | CA  | CA  | . ARG ARG ARG A A 49 49 | . 144.725 79.851 10.793 1.00 10.64 |
| 1 . .    |     |     |                         |                                    |
| ATOM 370 | CB  | CB  | . ARG ARG ARG A A 49 49 | . 145.870 80.854 10.674 1.00 12.65 |
| 1 . .    |     |     |                         |                                    |
| ATOM 371 | CG  | CG  | . ARG ARG ARG A A 49 49 | . 145.836 81.950 11.710 1.00 16.61 |
| 1 . .    |     |     |                         |                                    |
| ATOM 372 | CD  | CD  | . ARG ARG ARG A A 49 49 | . 145.194 83.097 11.073 1.00 15.15 |
| 1 . .    |     |     |                         |                                    |
| ATOM 373 | NE  | NE  | . ARG ARG ARG A A 49 49 | . 145.003 84.283 11.950 1.00 13.42 |
| 1 . .    |     |     |                         |                                    |
| ATOM 374 | CZ  | CZ  | . ARG ARG ARG A A 49 49 | . 144.156 85.278 11.684 1.00 12.41 |
| 1 . .    |     |     |                         |                                    |
| ATOM 375 | NH1 | NH1 | . ARG ARG ARG A A 49 49 | . 143.446 85.322 10.576 1.00 11.26 |
| 1 . .    |     |     |                         |                                    |
| ATOM 376 | NH2 | NH2 | . ARG ARG ARG A A 49 49 | . 143.999 86.224 12.587 1.00 11.21 |
| 1 . .    |     |     |                         |                                    |
| ATOM 377 | C   | C   | . ARG ARG ARG A A 49 49 | . 145.011 78.735 9.835 1.00 10.93  |
| 1 . .    |     |     |                         |                                    |
| ATOM 378 | O   | O   | . ARG ARG ARG A A 49 49 | . 145.575 77.663 10.201 1.00 12.11 |
| 1 . .    |     |     |                         |                                    |













|          |     |     |                                                            |
|----------|-----|-----|------------------------------------------------------------|
| ATOM 529 | CB  | CB  | . ASN ASN ASN A A 69 69 . 129.869 75.114 9.215 1.00 8.30   |
| 1 . .    |     |     |                                                            |
| ATOM 530 | CG  | CG  | . ASN ASN ASN A A 69 69 . 129.606 76.589 9.089 1.00 8.38   |
| 1 . .    |     |     |                                                            |
| ATOM 531 | OD1 | OD1 | . ASN ASN ASN A A 69 69 . 128.930 77.160 9.945 1.00 9.45   |
| 1 . .    |     |     |                                                            |
| ATOM 532 | ND2 | ND2 | . ASN ASN ASN A A 69 69 . 130.198 77.224 8.097 1.00 9.46   |
| 1 . .    |     |     |                                                            |
| ATOM 533 | C   | C   | . ASN ASN ASN A A 69 69 . 129.227 73.159 10.672 1.00 9.10  |
| 1 . .    |     |     |                                                            |
| ATOM 534 | O   | O   | . ASN ASN ASN A A 69 69 . 128.044 72.871 10.698 1.00 9.96  |
| 1 . .    |     |     |                                                            |
| ATOM 535 | N   | N   | . SER SER SER A A 70 70 . 130.270 72.345 10.670 1.00 9.11  |
| 1 . .    |     |     |                                                            |
| ATOM 536 | CA  | CA  | . SER SER SER A A 70 70 . 130.102 70.919 10.441 1.00 10.14 |
| 1 . .    |     |     |                                                            |
| ATOM 537 | CB  | CB  | . SER SER SER A A 70 70 . 131.173 70.413 9.419 1.00 9.61   |
| 1 . .    |     |     |                                                            |
| ATOM 538 | OG  | OG  | . SER SER SER A A 70 70 . 130.899 71.070 8.191 1.00 21.78  |
| 1 . .    |     |     |                                                            |
| ATOM 539 | C   | C   | . SER SER SER A A 70 70 . 130.217 70.059 11.715 1.00 8.53  |
| 1 . .    |     |     |                                                            |
| ATOM 540 | O   | O   | . SER SER SER A A 70 70 . 129.709 68.898 11.730 1.00 9.38  |
| 1 . .    |     |     |                                                            |
| ATOM 541 | N   | N   | . THR THR THR A A 71 71 . 130.856 70.591 12.803 1.00 8.56  |
| 1 . .    |     |     |                                                            |
| ATOM 542 | CA  | CA  | . THR THR THR A A 71 71 . 131.043 69.799 14.024 1.00 7.60  |
| 1 . .    |     |     |                                                            |
| ATOM 543 | CB  | CB  | . THR THR THR A A 71 71 . 132.527 69.539 14.240 1.00 6.69  |
| 1 . .    |     |     |                                                            |
| ATOM 544 | OG1 | OG1 | . THR THR THR A A 71 71 . 133.077 68.805 13.113 1.00 8.25  |
| 1 . .    |     |     |                                                            |
| ATOM 545 | CG2 | CG2 | . THR THR THR A A 71 71 . 132.779 68.643 15.480 1.00 9.19  |
| 1 . .    |     |     |                                                            |
| ATOM 546 | C   | C   | . THR THR THR A A 71 71 . 130.433 70.413 15.242 1.00 8.11  |
| 1 . .    |     |     |                                                            |
| ATOM 547 | O   | O   | . THR THR THR A A 71 71 . 129.586 69.801 15.930 1.00 8.55  |
| 1 . .    |     |     |                                                            |
| ATOM 548 | N   | N   | . ILE ILE ILE A A 72 72 . 130.724 71.713 15.472 1.00 7.05  |
| 1 . .    |     |     |                                                            |
| ATOM 549 | CA  | CA  | . ILE ILE ILE A A 72 72 . 130.182 72.327 16.672 1.00 7.19  |
| 1 . .    |     |     |                                                            |
| ATOM 550 | CB  | CB  | . ILE ILE ILE A A 72 72 . 130.898 73.659 16.998 1.00 7.33  |
| 1 . .    |     |     |                                                            |
| ATOM 551 | CG1 | CG1 | . ILE ILE ILE A A 72 72 . 132.383 73.403 17.409 1.00 8.30  |
| 1 . .    |     |     |                                                            |
| ATOM 552 | CD  | CD  | . ILE ILE ILE A A 72 72 . 133.236 74.699 17.498 1.00 9.49  |
| 1 . .    |     |     |                                                            |
| ATOM 553 | CG2 | CG2 | . ILE ILE ILE A A 72 72 . 130.191 74.347 18.060 1.00 10.15 |
| 1 . .    |     |     |                                                            |
| ATOM 554 | C   | C   | . ILE ILE ILE A A 72 72 . 128.670 72.531 16.507 1.00 7.86  |
| 1 . .    |     |     |                                                            |
| ATOM 555 | O   | O   | . ILE ILE ILE A A 72 72 . 127.919 72.238 17.451 1.00 8.84  |
| 1 . .    |     |     |                                                            |
| ATOM 556 | N   | N   | . ALA ALA ALA A A 73 73 . 128.215 73.068 15.370 1.00 7.60  |
| 1 . .    |     |     |                                                            |
| ATOM 557 | CA  | CA  | . ALA ALA ALA A A 73 73 . 126.786 73.337 15.204 1.00 8.79  |
| 1 . .    |     |     |                                                            |
| ATOM 558 | CB  | CB  | . ALA ALA ALA A A 73 73 . 126.537 73.938 13.810 1.00 10.50 |
| 1 . .    |     |     |                                                            |









































|           |     |     |                   |         |                          |            |
|-----------|-----|-----|-------------------|---------|--------------------------|------------|
| ATOM 1099 | CA  | CA  | . PRO PRO PRO A A | 147 147 | . 137.317 104.185 29.081 | 1.00 7.46  |
| 1 . .     |     |     |                   |         |                          |            |
| ATOM 1100 | CB  | CB  | . PRO PRO PRO A A | 147 147 | . 136.542 104.976 27.994 | 1.00 7.01  |
| 1 . .     |     |     |                   |         |                          |            |
| ATOM 1101 | CG  | CG  | . PRO PRO PRO A A | 147 147 | . 136.179 106.336 28.739 | 1.00 7.82  |
| 1 . .     |     |     |                   |         |                          |            |
| ATOM 1102 | CD  | CD  | . PRO PRO PRO A A | 147 147 | . 135.917 105.895 30.206 | 1.00 6.97  |
| 1 . .     |     |     |                   |         |                          |            |
| ATOM 1103 | C   | C   | . PRO PRO PRO A A | 147 147 | . 138.777 104.586 29.182 | 1.00 7.14  |
| 1 . .     |     |     |                   |         |                          |            |
| ATOM 1104 | O   | O   | . PRO PRO PRO A A | 147 147 | . 139.135 105.708 29.673 | 1.00 9.24  |
| 1 . .     |     |     |                   |         |                          |            |
| ATOM 1105 | N   | N   | . ALA ALA ALA A A | 148 148 | . 139.634 103.737 28.646 | 1.00 6.79  |
| 1 . .     |     |     |                   |         |                          |            |
| ATOM 1106 | CA  | CA  | . ALA ALA ALA A A | 148 148 | . 141.067 104.005 28.584 | 1.00 5.77  |
| 1 . .     |     |     |                   |         |                          |            |
| ATOM 1107 | CB  | CB  | . ALA ALA ALA A A | 148 148 | . 141.897 102.925 29.328 | 1.00 7.28  |
| 1 . .     |     |     |                   |         |                          |            |
| ATOM 1108 | C   | C   | . ALA ALA ALA A A | 148 148 | . 141.465 104.087 27.090 | 1.00 6.90  |
| 1 . .     |     |     |                   |         |                          |            |
| ATOM 1109 | O   | O   | . ALA ALA ALA A A | 148 148 | . 141.521 103.032 26.411 | 1.00 6.83  |
| 1 . .     |     |     |                   |         |                          |            |
| ATOM 1110 | N   | N   | . PHE PHE PHE A A | 149 149 | . 141.712 105.305 26.576 | 1.00 6.83  |
| 1 . .     |     |     |                   |         |                          |            |
| ATOM 1111 | CA  | CA  | . PHE PHE PHE A A | 149 149 | . 141.816 105.548 25.132 | 1.00 5.94  |
| 1 . .     |     |     |                   |         |                          |            |
| ATOM 1112 | CB  | CB  | . PHE PHE PHE A A | 149 149 | . 141.269 106.898 24.756 | 1.00 6.09  |
| 1 . .     |     |     |                   |         |                          |            |
| ATOM 1113 | CG  | CG  | . PHE PHE PHE A A | 149 149 | . 139.795 107.094 25.052 | 1.00 5.49  |
| 1 . .     |     |     |                   |         |                          |            |
| ATOM 1114 | CD1 | CD1 | . PHE PHE PHE A A | 149 149 | . 138.791 106.578 24.235 | 1.00 6.71  |
| 1 . .     |     |     |                   |         |                          |            |
| ATOM 1115 | CE1 | CE1 | . PHE PHE PHE A A | 149 149 | . 137.426 106.848 24.490 | 1.00 8.38  |
| 1 . .     |     |     |                   |         |                          |            |
| ATOM 1116 | CZ  | CZ  | . PHE PHE PHE A A | 149 149 | . 137.085 107.597 25.589 | 1.00 7.68  |
| 1 . .     |     |     |                   |         |                          |            |
| ATOM 1117 | CE2 | CE2 | . PHE PHE PHE A A | 149 149 | . 138.076 108.144 26.394 | 1.00 6.86  |
| 1 . .     |     |     |                   |         |                          |            |
| ATOM 1118 | CD2 | CD2 | . PHE PHE PHE A A | 149 149 | . 139.424 107.873 26.154 | 1.00 6.39  |
| 1 . .     |     |     |                   |         |                          |            |
| ATOM 1119 | C   | C   | . PHE PHE PHE A A | 149 149 | . 143.304 105.556 24.748 | 1.00 6.14  |
| 1 . .     |     |     |                   |         |                          |            |
| ATOM 1120 | O   | O   | . PHE PHE PHE A A | 149 149 | . 144.073 106.414 25.235 | 1.00 6.56  |
| 1 . .     |     |     |                   |         |                          |            |
| ATOM 1121 | N   | N   | . ASN ASN ASN A A | 150 150 | . 143.738 104.635 23.877 | 1.00 6.84  |
| 1 . .     |     |     |                   |         |                          |            |
| ATOM 1122 | CA  | CA  | . ASN ASN ASN A A | 150 150 | . 145.129 104.567 23.429 | 1.00 7.41  |
| 1 . .     |     |     |                   |         |                          |            |
| ATOM 1123 | CB  | CB  | . ASN ASN ASN A A | 150 150 | . 145.316 103.083 22.946 | 1.00 8.42  |
| 1 . .     |     |     |                   |         |                          |            |
| ATOM 1124 | CG  | CG  | . ASN ASN ASN A A | 150 150 | . 146.704 102.802 22.448 | 1.00 7.89  |
| 1 . .     |     |     |                   |         |                          |            |
| ATOM 1125 | OD1 | OD1 | . ASN ASN ASN A A | 150 150 | . 146.885 101.709 21.751 | 1.00 12.86 |
| 1 . .     |     |     |                   |         |                          |            |
| ATOM 1126 | ND2 | ND2 | . ASN ASN ASN A A | 150 150 | . 147.629 103.689 22.621 | 1.00 7.02  |
| 1 . .     |     |     |                   |         |                          |            |
| ATOM 1127 | C   | C   | . ASN ASN ASN A A | 150 150 | . 145.421 105.540 22.324 | 1.00 8.55  |
| 1 . .     |     |     |                   |         |                          |            |
| ATOM 1128 | O   | O   | . ASN ASN ASN A A | 150 150 | . 145.262 105.244 21.139 | 1.00 8.55  |
| 1 . .     |     |     |                   |         |                          |            |



















































|           |     |     |                   |         |                          |            |
|-----------|-----|-----|-------------------|---------|--------------------------|------------|
| ATOM 1789 | C   | C   | . LYS LYS LYS A A | 238 238 | . 140.607 113.743 34.593 | 1.00 9.78  |
| 1 . .     |     |     |                   |         |                          |            |
| ATOM 1790 | O   | O   | . LYS LYS LYS A A | 238 238 | . 139.878 112.787 34.465 | 1.00 10.48 |
| 1 . .     |     |     |                   |         |                          |            |
| ATOM 1791 | N   | N   | . ILE ILE ILE A A | 239 239 | . 141.806 113.839 34.029 | 1.00 9.78  |
| 1 . .     |     |     |                   |         |                          |            |
| ATOM 1792 | CA  | CA  | . ILE ILE ILE A A | 239 239 | . 142.261 112.779 33.133 | 1.00 8.95  |
| 1 . .     |     |     |                   |         |                          |            |
| ATOM 1793 | CB  | CB  | . ILE ILE ILE A A | 239 239 | . 142.278 113.292 31.658 | 1.00 10.15 |
| 1 . .     |     |     |                   |         |                          |            |
| ATOM 1794 | CG1 | CG1 | . ILE ILE ILE A A | 239 239 | . 140.857 113.693 31.256 | 1.00 11.97 |
| 1 . .     |     |     |                   |         |                          |            |
| ATOM 1795 | CD  | CD  | . ILE ILE ILE A A | 239 239 | . 140.724 114.277 29.784 | 1.00 11.69 |
| 1 . .     |     |     |                   |         |                          |            |
| ATOM 1796 | CG2 | CG2 | . ILE ILE ILE A A | 239 239 | . 142.794 112.142 30.731 | 1.00 9.46  |
| 1 . .     |     |     |                   |         |                          |            |
| ATOM 1797 | C   | C   | . ILE ILE ILE A A | 239 239 | . 143.614 112.363 33.561 | 1.00 10.02 |
| 1 . .     |     |     |                   |         |                          |            |
| ATOM 1798 | O   | O   | . ILE ILE ILE A A | 239 239 | . 144.495 113.202 33.769 | 1.00 13.40 |
| 1 . .     |     |     |                   |         |                          |            |
| ATOM 1799 | N   | N   | . VAL VAL VAL A A | 240 240 | . 143.816 111.058 33.677 | 1.00 9.49  |
| 1 . .     |     |     |                   |         |                          |            |
| ATOM 1800 | CA  | CA  | . VAL VAL VAL A A | 240 240 | . 145.142 110.452 34.068 | 1.00 8.88  |
| 1 . .     |     |     |                   |         |                          |            |
| ATOM 1801 | CB  | CB  | . VAL VAL VAL A A | 240 240 | . 145.017 109.718 35.419 | 1.00 8.79  |
| 1 . .     |     |     |                   |         |                          |            |
| ATOM 1802 | CG1 | CG1 | . VAL VAL VAL A A | 240 240 | . 144.666 110.752 36.489 | 1.00 10.90 |
| 1 . .     |     |     |                   |         |                          |            |
| ATOM 1803 | CG2 | CG2 | . VAL VAL VAL A A | 240 240 | . 144.013 108.574 35.389 | 1.00 11.72 |
| 1 . .     |     |     |                   |         |                          |            |
| ATOM 1804 | C   | C   | . VAL VAL VAL A A | 240 240 | . 145.616 109.519 32.953 | 1.00 9.13  |
| 1 . .     |     |     |                   |         |                          |            |
| ATOM 1805 | O   | O   | . VAL VAL VAL A A | 240 240 | . 144.921 109.371 31.916 | 1.00 9.26  |
| 1 . .     |     |     |                   |         |                          |            |
| ATOM 1806 | N   | N   | . ILE ILE ILE A A | 241 241 | . 146.753 108.887 33.139 | 1.00 8.03  |
| 1 . .     |     |     |                   |         |                          |            |
| ATOM 1807 | CA  | CA  | . ILE ILE ILE A A | 241 241 | . 147.412 108.189 32.040 | 1.00 8.36  |
| 1 . .     |     |     |                   |         |                          |            |
| ATOM 1808 | CB  | CB  | . ILE ILE ILE A A | 241 241 | . 148.769 108.825 31.686 | 1.00 8.60  |
| 1 . .     |     |     |                   |         |                          |            |
| ATOM 1809 | CG1 | CG1 | . ILE ILE ILE A A | 241 241 | . 148.538 110.243 31.065 | 1.00 8.76  |
| 1 . .     |     |     |                   |         |                          |            |
| ATOM 1810 | CD  | CD  | . ILE ILE ILE A A | 241 241 | . 149.904 111.059 30.877 | 1.00 10.52 |
| 1 . .     |     |     |                   |         |                          |            |
| ATOM 1811 | CG2 | CG2 | . ILE ILE ILE A A | 241 241 | . 149.619 107.919 30.756 | 1.00 11.26 |
| 1 . .     |     |     |                   |         |                          |            |
| ATOM 1812 | C   | C   | . ILE ILE ILE A A | 241 241 | . 147.605 106.739 32.424 | 1.00 9.09  |
| 1 . .     |     |     |                   |         |                          |            |
| ATOM 1813 | O   | O   | . ILE ILE ILE A A | 241 241 | . 147.934 106.376 33.566 | 1.00 8.33  |
| 1 . .     |     |     |                   |         |                          |            |
| ATOM 1814 | N   | N   | . GLY GLY GLY A A | 242 242 | . 147.381 105.871 31.447 | 1.00 8.29  |
| 1 . .     |     |     |                   |         |                          |            |
| ATOM 1815 | CA  | CA  | . GLY GLY GLY A A | 242 242 | . 147.741 104.483 31.569 | 1.00 8.49  |
| 1 . .     |     |     |                   |         |                          |            |
| ATOM 1816 | C   | C   | . GLY GLY GLY A A | 242 242 | . 148.688 104.084 30.477 | 1.00 7.19  |
| 1 . .     |     |     |                   |         |                          |            |
| ATOM 1817 | O   | O   | . GLY GLY GLY A A | 242 242 | . 148.723 104.689 29.439 | 1.00 9.26  |
| 1 . .     |     |     |                   |         |                          |            |
| ATOM 1818 | N   | N   | . MET MET MET A A | 243 243 | . 149.469 103.029 30.666 | 1.00 7.73  |
| 1 . .     |     |     |                   |         |                          |            |













































































































































|           |     |     |                   |       |                          |            |
|-----------|-----|-----|-------------------|-------|--------------------------|------------|
| ATOM 3679 | C   | C   | . LEU LEU LEU B B | 46 46 | . 124.276 120.490 6.086  | 1.00 9.22  |
| 1 . .     |     |     |                   |       |                          |            |
| ATOM 3680 | O   | O   | . LEU LEU LEU B B | 46 46 | . 123.314 119.886 6.536  | 1.00 11.15 |
| 1 . .     |     |     |                   |       |                          |            |
| ATOM 3681 | N   | N   | . GLU GLU GLU B B | 47 47 | . 125.500 120.304 6.524  | 1.00 10.37 |
| 1 . .     |     |     |                   |       |                          |            |
| ATOM 3682 | CA  | CA  | . GLU GLU GLU B B | 47 47 | . 125.789 119.509 7.746  | 1.00 9.23  |
| 1 . .     |     |     |                   |       |                          |            |
| ATOM 3683 | CB  | CB  | . GLU GLU GLU B B | 47 47 | . 127.202 118.862 7.605  | 1.00 8.20  |
| 1 . .     |     |     |                   |       |                          |            |
| ATOM 3684 | CG  | CG  | . GLU GLU GLU B B | 47 47 | . 127.571 118.140 8.875  | 1.00 10.29 |
| 1 . .     |     |     |                   |       |                          |            |
| ATOM 3685 | CD  | CD  | . GLU GLU GLU B B | 47 47 | . 128.979 117.601 8.710  | 1.00 12.02 |
| 1 . .     |     |     |                   |       |                          |            |
| ATOM 3686 | OE1 | OE1 | . GLU GLU GLU B B | 47 47 | . 129.054 116.469 8.200  | 1.00 10.06 |
| 1 . .     |     |     |                   |       |                          |            |
| ATOM 3687 | OE2 | OE2 | . GLU GLU GLU B B | 47 47 | . 129.946 118.296 9.054  | 1.00 11.41 |
| 1 . .     |     |     |                   |       |                          |            |
| ATOM 3688 | C   | C   | . GLU GLU GLU B B | 47 47 | . 125.756 120.547 8.925  | 1.00 9.17  |
| 1 . .     |     |     |                   |       |                          |            |
| ATOM 3689 | O   | O   | . GLU GLU GLU B B | 47 47 | . 126.665 121.388 9.031  | 1.00 11.27 |
| 1 . .     |     |     |                   |       |                          |            |
| ATOM 3690 | N   | N   | . LEU LEU LEU B B | 48 48 | . 124.757 120.365 9.821  | 1.00 7.72  |
| 1 . .     |     |     |                   |       |                          |            |
| ATOM 3691 | CA  | CA  | . LEU LEU LEU B B | 48 48 | . 124.568 121.289 10.905 | 1.00 8.10  |
| 1 . .     |     |     |                   |       |                          |            |
| ATOM 3692 | CB  | CB  | . LEU LEU LEU B B | 48 48 | . 123.058 121.375 11.304 | 1.00 8.19  |
| 1 . .     |     |     |                   |       |                          |            |
| ATOM 3693 | CG  | CG  | . LEU LEU LEU B B | 48 48 | . 122.815 122.327 12.524 | 1.00 9.32  |
| 1 . .     |     |     |                   |       |                          |            |
| ATOM 3694 | CD1 | CD1 | . LEU LEU LEU B B | 48 48 | . 123.135 123.775 12.136 | 1.00 14.28 |
| 1 . .     |     |     |                   |       |                          |            |
| ATOM 3695 | CD2 | CD2 | . LEU LEU LEU B B | 48 48 | . 121.329 122.160 12.929 | 1.00 12.15 |
| 1 . .     |     |     |                   |       |                          |            |
| ATOM 3696 | C   | C   | . LEU LEU LEU B B | 48 48 | . 125.447 120.903 12.094 | 1.00 9.12  |
| 1 . .     |     |     |                   |       |                          |            |
| ATOM 3697 | O   | O   | . LEU LEU LEU B B | 48 48 | . 125.270 119.815 12.665 | 1.00 8.99  |
| 1 . .     |     |     |                   |       |                          |            |
| ATOM 3698 | N   | N   | . ARG ARG ARG B B | 49 49 | . 126.380 121.771 12.455 | 1.00 10.18 |
| 1 . .     |     |     |                   |       |                          |            |
| ATOM 3699 | CA  | CA  | . ARG ARG ARG B B | 49 49 | . 127.215 121.602 13.671 | 1.00 10.67 |
| 1 . .     |     |     |                   |       |                          |            |
| ATOM 3700 | CB  | CB  | . ARG ARG ARG B B | 49 49 | . 128.708 121.776 13.270 | 1.00 12.91 |
| 1 . .     |     |     |                   |       |                          |            |
| ATOM 3701 | CG  | CG  | . ARG ARG ARG B B | 49 49 | . 129.169 120.800 12.149 | 1.00 13.47 |
| 1 . .     |     |     |                   |       |                          |            |
| ATOM 3702 | CD  | CD  | . ARG ARG ARG B B | 49 49 | . 129.739 119.624 12.877 | 1.00 13.24 |
| 1 . .     |     |     |                   |       |                          |            |
| ATOM 3703 | NE  | NE  | . ARG ARG ARG B B | 49 49 | . 130.194 118.514 12.028 | 1.00 12.86 |
| 1 . .     |     |     |                   |       |                          |            |
| ATOM 3704 | CZ  | CZ  | . ARG ARG ARG B B | 49 49 | . 130.370 117.246 12.405 | 1.00 10.72 |
| 1 . .     |     |     |                   |       |                          |            |
| ATOM 3705 | NH1 | NH1 | . ARG ARG ARG B B | 49 49 | . 130.207 116.907 13.663 | 1.00 10.40 |
| 1 . .     |     |     |                   |       |                          |            |
| ATOM 3706 | NH2 | NH2 | . ARG ARG ARG B B | 49 49 | . 130.737 116.342 11.475 | 1.00 13.71 |
| 1 . .     |     |     |                   |       |                          |            |
| ATOM 3707 | C   | C   | . ARG ARG ARG B B | 49 49 | . 126.910 122.711 14.648 | 1.00 10.12 |
| 1 . .     |     |     |                   |       |                          |            |
| ATOM 3708 | O   | O   | . ARG ARG ARG B B | 49 49 | . 126.370 123.771 14.244 | 1.00 11.86 |
| 1 . .     |     |     |                   |       |                          |            |

|           |     |     |                         |                          |            |
|-----------|-----|-----|-------------------------|--------------------------|------------|
| ATOM 3709 | N   | N   | . ASP ASP ASP B B 50 50 | . 127.196 122.460 15.921 | 1.00 9.55  |
| 1 . .     |     |     |                         |                          |            |
| ATOM 3710 | CA  | CA  | . ASP ASP ASP B B 50 50 | . 126.727 123.390 16.941 | 1.00 10.45 |
| 1 . .     |     |     |                         |                          |            |
| ATOM 3711 | CB  | CB  | . ASP ASP ASP B B 50 50 | . 126.826 122.703 18.311 | 1.00 11.10 |
| 1 . .     |     |     |                         |                          |            |
| ATOM 3712 | CG  | CG  | . ASP ASP ASP B B 50 50 | . 125.869 121.500 18.434 | 1.00 12.35 |
| 1 . .     |     |     |                         |                          |            |
| ATOM 3713 | OD1 | OD1 | . ASP ASP ASP B B 50 50 | . 124.933 121.425 17.623 | 1.00 10.62 |
| 1 . .     |     |     |                         |                          |            |
| ATOM 3714 | OD2 | OD2 | . ASP ASP ASP B B 50 50 | . 126.089 120.632 19.350 | 1.00 10.94 |
| 1 . .     |     |     |                         |                          |            |
| ATOM 3715 | C   | C   | . ASP ASP ASP B B 50 50 | . 127.529 124.682 17.006 | 1.00 12.42 |
| 1 . .     |     |     |                         |                          |            |
| ATOM 3716 | O   | O   | . ASP ASP ASP B B 50 50 | . 127.001 125.755 17.384 | 1.00 14.04 |
| 1 . .     |     |     |                         |                          |            |
| ATOM 3717 | N   | N   | . GLY GLY GLY B B 51 51 | . 128.816 124.585 16.692 | 1.00 11.43 |
| 1 . .     |     |     |                         |                          |            |
| ATOM 3718 | CA  | CA  | . GLY GLY GLY B B 51 51 | . 129.701 125.762 16.701 | 1.00 13.79 |
| 1 . .     |     |     |                         |                          |            |
| ATOM 3719 | C   | C   | . GLY GLY GLY B B 51 51 | . 130.074 126.201 18.104 | 1.00 15.94 |
| 1 . .     |     |     |                         |                          |            |
| ATOM 3720 | O   | O   | . GLY GLY GLY B B 51 51 | . 130.433 127.356 18.268 | 1.00 18.95 |
| 1 . .     |     |     |                         |                          |            |
| ATOM 3721 | N   | N   | . ASP ASP ASP B B 52 52 | . 129.871 125.371 19.125 | 1.00 14.48 |
| 1 . .     |     |     |                         |                          |            |
| ATOM 3722 | CA  | CA  | . ASP ASP ASP B B 52 52 | . 130.230 125.725 20.507 | 1.00 15.25 |
| 1 . .     |     |     |                         |                          |            |
| ATOM 3723 | CB  | CB  | . ASP ASP ASP B B 52 52 | . 129.350 124.999 21.509 | 1.00 14.91 |
| 1 . .     |     |     |                         |                          |            |
| ATOM 3724 | CG  | CG  | . ASP ASP ASP B B 52 52 | . 129.775 125.231 22.946 | 1.00 17.18 |
| 1 . .     |     |     |                         |                          |            |
| ATOM 3725 | OD1 | OD1 | . ASP ASP ASP B B 52 52 | . 130.881 125.849 23.168 | 1.00 20.19 |
| 1 . .     |     |     |                         |                          |            |
| ATOM 3726 | OD2 | OD2 | . ASP ASP ASP B B 52 52 | . 129.025 124.763 23.834 | 1.00 21.29 |
| 1 . .     |     |     |                         |                          |            |
| ATOM 3727 | C   | C   | . ASP ASP ASP B B 52 52 | . 131.728 125.353 20.657 | 1.00 17.77 |
| 1 . .     |     |     |                         |                          |            |
| ATOM 3728 | O   | O   | . ASP ASP ASP B B 52 52 | . 132.072 124.151 20.752 | 1.00 16.46 |
| 1 . .     |     |     |                         |                          |            |
| ATOM 3729 | N   | N   | . LYS LYS LYS B B 53 53 | . 132.621 126.355 20.634 | 1.00 18.19 |
| 1 . .     |     |     |                         |                          |            |
| ATOM 3730 | CA  | CA  | . LYS LYS LYS B B 53 53 | . 134.078 126.136 20.464 | 1.00 20.77 |
| 1 . .     |     |     |                         |                          |            |
| ATOM 3731 | CB  | CB  | . LYS LYS LYS B B 53 53 | . 134.742 127.514 20.204 | 1.00 22.81 |
| 1 . .     |     |     |                         |                          |            |
| ATOM 3732 | CG  | CG  | . LYS LYS LYS B B 53 53 | . 134.803 127.928 18.685 | 1.00 30.67 |
| 1 . .     |     |     |                         |                          |            |
| ATOM 3733 | CD  | CD  | . LYS LYS LYS B B 53 53 | . 134.381 129.444 18.324 | 1.00 41.35 |
| 1 . .     |     |     |                         |                          |            |
| ATOM 3734 | CE  | CE  | . LYS LYS LYS B B 53 53 | . 135.334 130.601 18.756 | 1.00 45.21 |
| 1 . .     |     |     |                         |                          |            |
| ATOM 3735 | NZ  | NZ  | . LYS LYS LYS B B 53 53 | . 136.527 130.821 17.874 | 1.00 49.00 |
| 1 . .     |     |     |                         |                          |            |
| ATOM 3736 | C   | C   | . LYS LYS LYS B B 53 53 | . 134.654 125.422 21.673 | 1.00 20.55 |
| 1 . .     |     |     |                         |                          |            |
| ATOM 3737 | O   | O   | . LYS LYS LYS B B 53 53 | . 135.764 124.867 21.607 | 1.00 22.73 |
| 1 . .     |     |     |                         |                          |            |
| ATOM 3738 | N   | N   | . GLN GLN GLN B B 54 54 | . 133.869 125.372 22.732 | 1.00 19.31 |
| 1 . .     |     |     |                         |                          |            |























|           |     |     |                         |                          |            |
|-----------|-----|-----|-------------------------|--------------------------|------------|
| ATOM 4039 | N   | N   | . LEU LEU LEU B B 94 94 | . 111.376 117.236 4.184  | 1.00 9.68  |
| 1 . .     |     |     |                         |                          |            |
| ATOM 4040 | CA  | CA  | . LEU LEU LEU B B 94 94 | . 111.876 118.352 3.391  | 1.00 11.45 |
| 1 . .     |     |     |                         |                          |            |
| ATOM 4041 | CB  | CB  | . LEU LEU LEU B B 94 94 | . 111.871 118.009 1.910  | 1.00 11.32 |
| 1 . .     |     |     |                         |                          |            |
| ATOM 4042 | CG  | CG  | . LEU LEU LEU B B 94 94 | . 112.721 116.835 1.416  | 1.00 17.73 |
| 1 . .     |     |     |                         |                          |            |
| ATOM 4043 | CD1 | CD1 | . LEU LEU LEU B B 94 94 | . 112.850 116.883 -0.103 | 1.00 18.65 |
| 1 . .     |     |     |                         |                          |            |
| ATOM 4044 | CD2 | CD2 | . LEU LEU LEU B B 94 94 | . 113.929 116.416 2.132  | 1.00 17.76 |
| 1 . .     |     |     |                         |                          |            |
| ATOM 4045 | C   | C   | . LEU LEU LEU B B 94 94 | . 111.053 119.641 3.609  | 1.00 10.10 |
| 1 . .     |     |     |                         |                          |            |
| ATOM 4046 | O   | O   | . LEU LEU LEU B B 94 94 | . 111.621 120.708 3.720  | 1.00 10.98 |
| 1 . .     |     |     |                         |                          |            |
| ATOM 4047 | N   | N   | . GLU GLU GLU B B 95 95 | . 109.708 119.457 3.725  | 1.00 12.29 |
| 1 . .     |     |     |                         |                          |            |
| ATOM 4048 | CA  | CA  | . GLU GLU GLU B B 95 95 | . 108.845 120.587 3.886  | 1.00 12.19 |
| 1 . .     |     |     |                         |                          |            |
| ATOM 4049 | CB  | CB  | . GLU GLU GLU B B 95 95 | . 107.416 120.243 3.514  | 1.00 14.26 |
| 1 . .     |     |     |                         |                          |            |
| ATOM 4050 | CG  | CG  | . GLU GLU GLU B B 95 95 | . 107.228 119.935 2.018  | 1.00 20.98 |
| 1 . .     |     |     |                         |                          |            |
| ATOM 4051 | CD  | CD  | . GLU GLU GLU B B 95 95 | . 107.662 121.026 1.172  | 1.00 32.48 |
| 1 . .     |     |     |                         |                          |            |
| ATOM 4052 | OE1 | OE1 | . GLU GLU GLU B B 95 95 | . 106.890 122.011 1.046  | 1.00 39.57 |
| 1 . .     |     |     |                         |                          |            |
| ATOM 4053 | OE2 | OE2 | . GLU GLU GLU B B 95 95 | . 108.805 120.965 0.702  | 1.00 31.49 |
| 1 . .     |     |     |                         |                          |            |
| ATOM 4054 | C   | C   | . GLU GLU GLU B B 95 95 | . 108.932 121.153 5.328  | 1.00 12.01 |
| 1 . .     |     |     |                         |                          |            |
| ATOM 4055 | O   | O   | . GLU GLU GLU B B 95 95 | . 108.764 122.362 5.507  | 1.00 13.71 |
| 1 . .     |     |     |                         |                          |            |
| ATOM 4056 | N   | N   | . LEU LEU LEU B B 96 96 | . 109.238 120.304 6.337  | 1.00 10.81 |
| 1 . .     |     |     |                         |                          |            |
| ATOM 4057 | CA  | CA  | . LEU LEU LEU B B 96 96 | . 109.351 120.742 7.694  | 1.00 12.07 |
| 1 . .     |     |     |                         |                          |            |
| ATOM 4058 | CB  | CB  | . LEU LEU LEU B B 96 96 | . 109.478 119.563 8.618  | 1.00 13.50 |
| 1 . .     |     |     |                         |                          |            |
| ATOM 4059 | CG  | CG  | . LEU LEU LEU B B 96 96 | . 108.258 118.827 9.142  | 1.00 19.88 |
| 1 . .     |     |     |                         |                          |            |
| ATOM 4060 | CD1 | CD1 | . LEU LEU LEU B B 96 96 | . 108.632 117.436 9.755  | 1.00 23.68 |
| 1 . .     |     |     |                         |                          |            |
| ATOM 4061 | CD2 | CD2 | . LEU LEU LEU B B 96 96 | . 107.512 119.858 10.157 | 1.00 23.08 |
| 1 . .     |     |     |                         |                          |            |
| ATOM 4062 | C   | C   | . LEU LEU LEU B B 96 96 | . 110.594 121.616 7.826  | 1.00 12.04 |
| 1 . .     |     |     |                         |                          |            |
| ATOM 4063 | O   | O   | . LEU LEU LEU B B 96 96 | . 110.557 122.641 8.520  | 1.00 13.00 |
| 1 . .     |     |     |                         |                          |            |
| ATOM 4064 | N   | N   | . ASP ASP ASP B B 97 97 | . 111.689 121.263 7.122  | 1.00 11.26 |
| 1 . .     |     |     |                         |                          |            |
| ATOM 4065 | CA  | CA  | . ASP ASP ASP B B 97 97 | . 112.868 122.098 7.180  | 1.00 10.63 |
| 1 . .     |     |     |                         |                          |            |
| ATOM 4066 | CB  | CB  | . ASP ASP ASP B B 97 97 | . 114.033 121.268 6.618  | 1.00 9.61  |
| 1 . .     |     |     |                         |                          |            |
| ATOM 4067 | CG  | CG  | . ASP ASP ASP B B 97 97 | . 115.246 122.163 6.225  | 1.00 11.47 |
| 1 . .     |     |     |                         |                          |            |
| ATOM 4068 | OD1 | OD1 | . ASP ASP ASP B B 97 97 | . 116.271 122.283 6.979  | 1.00 11.33 |
| 1 . .     |     |     |                         |                          |            |

































































|           |     |     |               |     |         |                         |            |
|-----------|-----|-----|---------------|-----|---------|-------------------------|------------|
| ATOM 4909 | C   | C   | . GLY GLY GLY | B B | 211 211 | . 146.314 104.142 3.694 | 1.00 7.33  |
| 1 . .     |     |     |               |     |         |                         |            |
| ATOM 4910 | O   | O   | . GLY GLY GLY | B B | 211 211 | . 146.319 104.902 4.685 | 1.00 7.64  |
| 1 . .     |     |     |               |     |         |                         |            |
| ATOM 4911 | N   | N   | . PHE PHE PHE | B B | 212 212 | . 147.444 103.625 3.155 | 1.00 6.93  |
| 1 . .     |     |     |               |     |         |                         |            |
| ATOM 4912 | CA  | CA  | . PHE PHE PHE | B B | 212 212 | . 148.694 104.058 3.719 | 1.00 7.37  |
| 1 . .     |     |     |               |     |         |                         |            |
| ATOM 4913 | CB  | CB  | . PHE PHE PHE | B B | 212 212 | . 149.820 103.148 3.164 | 1.00 8.33  |
| 1 . .     |     |     |               |     |         |                         |            |
| ATOM 4914 | CG  | CG  | . PHE PHE PHE | B B | 212 212 | . 149.601 101.741 3.499 | 1.00 8.77  |
| 1 . .     |     |     |               |     |         |                         |            |
| ATOM 4915 | CD1 | CD1 | . PHE PHE PHE | B B | 212 212 | . 149.268 100.843 2.499 | 1.00 9.73  |
| 1 . .     |     |     |               |     |         |                         |            |
| ATOM 4916 | CE1 | CE1 | . PHE PHE PHE | B B | 212 212 | . 149.022 99.495 2.803  | 1.00 11.01 |
| 1 . .     |     |     |               |     |         |                         |            |
| ATOM 4917 | CZ  | CZ  | . PHE PHE PHE | B B | 212 212 | . 149.067 99.085 4.090  | 1.00 7.77  |
| 1 . .     |     |     |               |     |         |                         |            |
| ATOM 4918 | CE2 | CE2 | . PHE PHE PHE | B B | 212 212 | . 149.400 99.987 5.132  | 1.00 9.28  |
| 1 . .     |     |     |               |     |         |                         |            |
| ATOM 4919 | CD2 | CD2 | . PHE PHE PHE | B B | 212 212 | . 149.675 101.329 4.813 | 1.00 9.17  |
| 1 . .     |     |     |               |     |         |                         |            |
| ATOM 4920 | C   | C   | . PHE PHE PHE | B B | 212 212 | . 148.966 105.497 3.412 | 1.00 8.76  |
| 1 . .     |     |     |               |     |         |                         |            |
| ATOM 4921 | O   | O   | . PHE PHE PHE | B B | 212 212 | . 148.522 106.065 2.364 | 1.00 9.87  |
| 1 . .     |     |     |               |     |         |                         |            |
| ATOM 4922 | N   | N   | . ALA ALA ALA | B B | 213 213 | . 149.746 106.064 4.315 | 1.00 9.25  |
| 1 . .     |     |     |               |     |         |                         |            |
| ATOM 4923 | CA  | CA  | . ALA ALA ALA | B B | 213 213 | . 150.070 107.488 4.191 | 1.00 10.89 |
| 1 . .     |     |     |               |     |         |                         |            |
| ATOM 4924 | CB  | CB  | . ALA ALA ALA | B B | 213 213 | . 149.457 108.252 5.415 | 1.00 12.97 |
| 1 . .     |     |     |               |     |         |                         |            |
| ATOM 4925 | C   | C   | . ALA ALA ALA | B B | 213 213 | . 151.546 107.689 4.165 | 1.00 11.54 |
| 1 . .     |     |     |               |     |         |                         |            |
| ATOM 4926 | O   | O   | . ALA ALA ALA | B B | 213 213 | . 152.123 108.250 5.133 | 1.00 12.72 |
| 1 . .     |     |     |               |     |         |                         |            |
| ATOM 4927 | N   | N   | . PRO PRO PRO | B B | 214 214 | . 152.200 107.263 3.078 | 1.00 10.90 |
| 1 . .     |     |     |               |     |         |                         |            |
| ATOM 4928 | CA  | CA  | . PRO PRO PRO | B B | 214 214 | . 153.650 107.519 2.956 | 1.00 10.44 |
| 1 . .     |     |     |               |     |         |                         |            |
| ATOM 4929 | CB  | CB  | . PRO PRO PRO | B B | 214 214 | . 154.067 106.646 1.773 | 1.00 11.36 |
| 1 . .     |     |     |               |     |         |                         |            |
| ATOM 4930 | CG  | CG  | . PRO PRO PRO | B B | 214 214 | . 152.811 106.592 0.880 | 1.00 9.89  |
| 1 . .     |     |     |               |     |         |                         |            |
| ATOM 4931 | CD  | CD  | . PRO PRO PRO | B B | 214 214 | . 151.698 106.487 1.942 | 1.00 10.77 |
| 1 . .     |     |     |               |     |         |                         |            |
| ATOM 4932 | C   | C   | . PRO PRO PRO | B B | 214 214 | . 153.867 108.986 2.666 | 1.00 10.87 |
| 1 . .     |     |     |               |     |         |                         |            |
| ATOM 4933 | O   | O   | . PRO PRO PRO | B B | 214 214 | . 153.016 109.634 2.064 | 1.00 11.81 |
| 1 . .     |     |     |               |     |         |                         |            |
| ATOM 4934 | N   | N   | . ASN ASN ASN | B B | 215 215 | . 154.978 109.542 3.175 | 1.00 10.59 |
| 1 . .     |     |     |               |     |         |                         |            |
| ATOM 4935 | CA  | CA  | . ASN ASN ASN | B B | 215 215 | . 155.234 111.009 2.964 | 1.00 12.79 |
| 1 . .     |     |     |               |     |         |                         |            |
| ATOM 4936 | CB  | CB  | . ASN ASN ASN | B B | 215 215 | . 156.127 111.531 4.083 | 1.00 15.05 |
| 1 . .     |     |     |               |     |         |                         |            |
| ATOM 4937 | CG  | CG  | . ASN ASN ASN | B B | 215 215 | . 157.530 110.718 4.237 | 1.00 29.27 |
| 1 . .     |     |     |               |     |         |                         |            |
| ATOM 4938 | OD1 | OD1 | . ASN ASN ASN | B B | 215 215 | . 158.487 111.202 4.930 | 1.00 41.17 |
| 1 . .     |     |     |               |     |         |                         |            |



















|           |     |     |                   |         |                          |            |
|-----------|-----|-----|-------------------|---------|--------------------------|------------|
| ATOM 5179 | C   | C   | . ALA ALA ALA B B | 247 247 | . 139.877 120.327 -6.671 | 1.00 7.98  |
| 1 . .     |     |     |                   |         |                          |            |
| ATOM 5180 | O   | O   | . ALA ALA ALA B B | 247 247 | . 140.580 121.328 -6.644 | 1.00 8.02  |
| 1 . .     |     |     |                   |         |                          |            |
| ATOM 5181 | N   | N   | . SER SER SER B B | 248 248 | . 138.640 120.327 -6.197 | 1.00 8.57  |
| 1 . .     |     |     |                   |         |                          |            |
| ATOM 5182 | CA  | CA  | . SER SER SER B B | 248 248 | . 138.096 121.550 -5.522 | 1.00 8.02  |
| 1 . .     |     |     |                   |         |                          |            |
| ATOM 5183 | CB  | CB  | . SER SER SER B B | 248 248 | . 136.641 121.400 -5.116 | 1.00 7.51  |
| 1 . .     |     |     |                   |         |                          |            |
| ATOM 5184 | OG  | OG  | . SER SER SER B B | 248 248 | . 135.841 121.024 -6.233 | 1.00 7.91  |
| 1 . .     |     |     |                   |         |                          |            |
| ATOM 5185 | C   | C   | . SER SER SER B B | 248 248 | . 138.943 121.938 -4.312 | 1.00 8.51  |
| 1 . .     |     |     |                   |         |                          |            |
| ATOM 5186 | O   | O   | . SER SER SER B B | 248 248 | . 138.953 123.119 -3.924 | 1.00 10.48 |
| 1 . .     |     |     |                   |         |                          |            |
| ATOM 5187 | N   | N   | . GLU GLU GLU B B | 249 249 | . 139.593 120.955 -3.694 | 1.00 8.13  |
| 1 . .     |     |     |                   |         |                          |            |
| ATOM 5188 | CA  | CA  | . GLU GLU GLU B B | 249 249 | . 140.423 121.233 -2.525 | 1.00 9.30  |
| 1 . .     |     |     |                   |         |                          |            |
| ATOM 5189 | CB  | CB  | . GLU GLU GLU B B | 249 249 | . 140.830 119.898 -1.863 | 1.00 8.29  |
| 1 . .     |     |     |                   |         |                          |            |
| ATOM 5190 | CG  | CG  | . GLU GLU GLU B B | 249 249 | . 139.575 119.158 -1.349 | 1.00 10.93 |
| 1 . .     |     |     |                   |         |                          |            |
| ATOM 5191 | CD  | CD  | . GLU GLU GLU B B | 249 249 | . 138.887 119.901 -0.198 | 1.00 10.86 |
| 1 . .     |     |     |                   |         |                          |            |
| ATOM 5192 | OE1 | OE1 | . GLU GLU GLU B B | 249 249 | . 139.595 120.344 0.748  | 1.00 18.10 |
| 1 . .     |     |     |                   |         |                          |            |
| ATOM 5193 | OE2 | OE2 | . GLU GLU GLU B B | 249 249 | . 137.661 120.038 -0.177 | 1.00 10.84 |
| 1 . .     |     |     |                   |         |                          |            |
| ATOM 5194 | C   | C   | . GLU GLU GLU B B | 249 249 | . 141.679 121.995 -2.824 | 1.00 10.33 |
| 1 . .     |     |     |                   |         |                          |            |
| ATOM 5195 | O   | O   | . GLU GLU GLU B B | 249 249 | . 142.221 122.642 -1.912 | 1.00 12.73 |
| 1 . .     |     |     |                   |         |                          |            |
| ATOM 5196 | N   | N   | . PHE PHE PHE B B | 250 250 | . 142.076 122.060 -4.111 | 1.00 8.76  |
| 1 . .     |     |     |                   |         |                          |            |
| ATOM 5197 | CA  | CA  | . PHE PHE PHE B B | 250 250 | . 143.322 122.748 -4.453 | 1.00 9.27  |
| 1 . .     |     |     |                   |         |                          |            |
| ATOM 5198 | CB  | CB  | . PHE PHE PHE B B | 250 250 | . 144.476 121.769 -4.564 | 1.00 9.36  |
| 1 . .     |     |     |                   |         |                          |            |
| ATOM 5199 | CG  | CG  | . PHE PHE PHE B B | 250 250 | . 144.349 120.726 -5.672 | 1.00 8.00  |
| 1 . .     |     |     |                   |         |                          |            |
| ATOM 5200 | CD1 | CD1 | . PHE PHE PHE B B | 250 250 | . 144.070 119.415 -5.347 | 1.00 8.74  |
| 1 . .     |     |     |                   |         |                          |            |
| ATOM 5201 | CE1 | CE1 | . PHE PHE PHE B B | 250 250 | . 143.994 118.403 -6.331 | 1.00 8.13  |
| 1 . .     |     |     |                   |         |                          |            |
| ATOM 5202 | CZ  | CZ  | . PHE PHE PHE B B | 250 250 | . 144.199 118.696 -7.678 | 1.00 9.75  |
| 1 . .     |     |     |                   |         |                          |            |
| ATOM 5203 | CE2 | CE2 | . PHE PHE PHE B B | 250 250 | . 144.514 120.031 -8.035 | 1.00 10.87 |
| 1 . .     |     |     |                   |         |                          |            |
| ATOM 5204 | CD2 | CD2 | . PHE PHE PHE B B | 250 250 | . 144.578 121.027 -7.031 | 1.00 8.36  |
| 1 . .     |     |     |                   |         |                          |            |
| ATOM 5205 | C   | C   | . PHE PHE PHE B B | 250 250 | . 143.174 123.743 -5.628 | 1.00 9.15  |
| 1 . .     |     |     |                   |         |                          |            |
| ATOM 5206 | O   | O   | . PHE PHE PHE B B | 250 250 | . 144.147 124.259 -6.135 | 1.00 10.84 |
| 1 . .     |     |     |                   |         |                          |            |
| ATOM 5207 | N   | N   | . TYR TYR TYR B B | 251 251 | . 141.925 124.077 -5.926 | 1.00 9.03  |
| 1 . .     |     |     |                   |         |                          |            |
| ATOM 5208 | CA  | CA  | . TYR TYR TYR B B | 251 251 | . 141.662 125.165 -6.836 | 1.00 9.21  |
| 1 . .     |     |     |                   |         |                          |            |



























































|           |     |     |                   |         |                          |            |
|-----------|-----|-----|-------------------|---------|--------------------------|------------|
| ATOM 5989 | C   | C   | . SER SER SER B B | 348 348 | . 117.503 110.682 1.144  | 1.00 8.21  |
| 1 . .     |     |     |                   |         |                          |            |
| ATOM 5990 | O   | O   | . SER SER SER B B | 348 348 | . 118.066 110.795 0.083  | 1.00 8.89  |
| 1 . .     |     |     |                   |         |                          |            |
| ATOM 5991 | N   | N   | . VAL VAL VAL B B | 349 349 | . 116.937 109.565 1.557  | 1.00 9.11  |
| 1 . .     |     |     |                   |         |                          |            |
| ATOM 5992 | CA  | CA  | . VAL VAL VAL B B | 349 349 | . 116.978 108.381 0.696  | 1.00 9.38  |
| 1 . .     |     |     |                   |         |                          |            |
| ATOM 5993 | CB  | CB  | . VAL VAL VAL B B | 349 349 | . 116.404 107.157 1.464  | 1.00 9.42  |
| 1 . .     |     |     |                   |         |                          |            |
| ATOM 5994 | CG1 | CG1 | . VAL VAL VAL B B | 349 349 | . 116.215 105.910 0.545  | 1.00 13.07 |
| 1 . .     |     |     |                   |         |                          |            |
| ATOM 5995 | CG2 | CG2 | . VAL VAL VAL B B | 349 349 | . 117.318 106.793 2.640  | 1.00 10.63 |
| 1 . .     |     |     |                   |         |                          |            |
| ATOM 5996 | C   | C   | . VAL VAL VAL B B | 349 349 | . 116.231 108.639 -0.622 | 1.00 9.26  |
| 1 . .     |     |     |                   |         |                          |            |
| ATOM 5997 | O   | O   | . VAL VAL VAL B B | 349 349 | . 116.678 108.285 -1.701 | 1.00 10.14 |
| 1 . .     |     |     |                   |         |                          |            |
| ATOM 5998 | N   | N   | . THR THR THR B B | 350 350 | . 115.016 109.208 -0.526 | 1.00 9.82  |
| 1 . .     |     |     |                   |         |                          |            |
| ATOM 5999 | CA  | CA  | . THR THR THR B B | 350 350 | . 114.254 109.451 -1.761 | 1.00 10.38 |
| 1 . .     |     |     |                   |         |                          |            |
| ATOM 6000 | CB  | CB  | . THR THR THR B B | 350 350 | . 112.946 110.172 -1.394 | 1.00 10.31 |
| 1 . .     |     |     |                   |         |                          |            |
| ATOM 6001 | OG1 | OG1 | . THR THR THR B B | 350 350 | . 112.144 109.226 -0.631 | 1.00 11.39 |
| 1 . .     |     |     |                   |         |                          |            |
| ATOM 6002 | CG2 | CG2 | . THR THR THR B B | 350 350 | . 112.182 110.574 -2.658 | 1.00 13.91 |
| 1 . .     |     |     |                   |         |                          |            |
| ATOM 6003 | C   | C   | . THR THR THR B B | 350 350 | . 115.030 110.275 -2.790 | 1.00 9.63  |
| 1 . .     |     |     |                   |         |                          |            |
| ATOM 6004 | O   | O   | . THR THR THR B B | 350 350 | . 115.054 109.912 -3.951 | 1.00 10.31 |
| 1 . .     |     |     |                   |         |                          |            |
| ATOM 6005 | N   | N   | . GLU GLU GLU B B | 351 351 | . 115.667 111.351 -2.360 | 1.00 9.10  |
| 1 . .     |     |     |                   |         |                          |            |
| ATOM 6006 | CA  | CA  | . GLU GLU GLU B B | 351 351 | . 116.395 112.157 -3.345 | 1.00 9.22  |
| 1 . .     |     |     |                   |         |                          |            |
| ATOM 6007 | CB  | CB  | . GLU GLU GLU B B | 351 351 | . 116.775 113.477 -2.680 | 1.00 9.40  |
| 1 . .     |     |     |                   |         |                          |            |
| ATOM 6008 | CG  | CG  | . GLU GLU GLU B B | 351 351 | . 115.611 114.393 -2.373 | 1.00 10.49 |
| 1 . .     |     |     |                   |         |                          |            |
| ATOM 6009 | CD  | CD  | . GLU GLU GLU B B | 351 351 | . 116.026 115.532 -1.462 | 1.00 10.62 |
| 1 . .     |     |     |                   |         |                          |            |
| ATOM 6010 | OE1 | OE1 | . GLU GLU GLU B B | 351 351 | . 116.385 115.315 -0.304 | 1.00 11.45 |
| 1 . .     |     |     |                   |         |                          |            |
| ATOM 6011 | OE2 | OE2 | . GLU GLU GLU B B | 351 351 | . 115.968 116.717 -1.902 | 1.00 14.63 |
| 1 . .     |     |     |                   |         |                          |            |
| ATOM 6012 | C   | C   | . GLU GLU GLU B B | 351 351 | . 117.648 111.455 -3.872 | 1.00 10.40 |
| 1 . .     |     |     |                   |         |                          |            |
| ATOM 6013 | O   | O   | . GLU GLU GLU B B | 351 351 | . 117.983 111.635 -5.054 | 1.00 9.78  |
| 1 . .     |     |     |                   |         |                          |            |
| ATOM 6014 | N   | N   | . ALA ALA ALA B B | 352 352 | . 118.340 110.647 -3.031 | 1.00 9.71  |
| 1 . .     |     |     |                   |         |                          |            |
| ATOM 6015 | CA  | CA  | . ALA ALA ALA B B | 352 352 | . 119.544 109.890 -3.519 | 1.00 8.82  |
| 1 . .     |     |     |                   |         |                          |            |
| ATOM 6016 | CB  | CB  | . ALA ALA ALA B B | 352 352 | . 120.191 109.182 -2.370 | 1.00 9.27  |
| 1 . .     |     |     |                   |         |                          |            |
| ATOM 6017 | C   | C   | . ALA ALA ALA B B | 352 352 | . 119.089 108.911 -4.556 | 1.00 9.08  |
| 1 . .     |     |     |                   |         |                          |            |
| ATOM 6018 | O   | O   | . ALA ALA ALA B B | 352 352 | . 119.760 108.713 -5.560 | 1.00 9.61  |
| 1 . .     |     |     |                   |         |                          |            |





|           |     |     |                   |         |                           |            |
|-----------|-----|-----|-------------------|---------|---------------------------|------------|
| ATOM 6049 | CB  | CB  | . LYS LYS LYS B B | 357 357 | . 116.431 106.871 -11.081 | 1.00 11.67 |
| 1 . .     |     |     |                   |         |                           |            |
| ATOM 6050 | CG  | CG  | . LYS LYS LYS B B | 357 357 | . 116.169 105.711 -10.083 | 1.00 15.54 |
| 1 . .     |     |     |                   |         |                           |            |
| ATOM 6051 | CD  | CD  | . LYS LYS LYS B B | 357 357 | . 114.656 105.570 -9.784  | 1.00 20.83 |
| 1 . .     |     |     |                   |         |                           |            |
| ATOM 6052 | CE  | CE  | . LYS LYS LYS B B | 357 357 | . 113.966 104.970 -11.073 | 1.00 27.15 |
| 1 . .     |     |     |                   |         |                           |            |
| ATOM 6053 | NZ  | NZ  | . LYS LYS LYS B B | 357 357 | . 112.594 104.451 -10.807 | 1.00 29.22 |
| 1 . .     |     |     |                   |         |                           |            |
| ATOM 6054 | C   | C   | . LYS LYS LYS B B | 357 357 | . 118.144 107.907 -12.629 | 1.00 10.18 |
| 1 . .     |     |     |                   |         |                           |            |
| ATOM 6055 | O   | O   | . LYS LYS LYS B B | 357 357 | . 118.225 107.515 -13.807 | 1.00 12.69 |
| 1 . .     |     |     |                   |         |                           |            |
| ATOM 6056 | N   | N   | . LEU LEU LEU B B | 358 358 | . 118.325 109.182 -12.292 | 1.00 10.44 |
| 1 . .     |     |     |                   |         |                           |            |
| ATOM 6057 | CA  | CA  | . LEU LEU LEU B B | 358 358 | . 118.545 110.178 -13.328 | 1.00 11.46 |
| 1 . .     |     |     |                   |         |                           |            |
| ATOM 6058 | CB  | CB  | . LEU LEU LEU B B | 358 358 | . 118.547 111.581 -12.640 | 1.00 12.21 |
| 1 . .     |     |     |                   |         |                           |            |
| ATOM 6059 | CG  | CG  | . LEU LEU LEU B B | 358 358 | . 118.837 112.769 -13.587 | 1.00 12.47 |
| 1 . .     |     |     |                   |         |                           |            |
| ATOM 6060 | CD1 | CD1 | . LEU LEU LEU B B | 358 358 | . 117.703 112.900 -14.676 | 1.00 17.29 |
| 1 . .     |     |     |                   |         |                           |            |
| ATOM 6061 | CD2 | CD2 | . LEU LEU LEU B B | 358 358 | . 118.891 114.048 -12.795 | 1.00 15.24 |
| 1 . .     |     |     |                   |         |                           |            |
| ATOM 6062 | C   | C   | . LEU LEU LEU B B | 358 358 | . 119.844 109.905 -14.040 | 1.00 11.97 |
| 1 . .     |     |     |                   |         |                           |            |
| ATOM 6063 | O   | O   | . LEU LEU LEU B B | 358 358 | . 119.952 109.999 -15.301 | 1.00 12.16 |
| 1 . .     |     |     |                   |         |                           |            |
| ATOM 6064 | N   | N   | . ALA ALA ALA B B | 359 359 | . 120.896 109.629 -13.282 | 1.00 9.79  |
| 1 . .     |     |     |                   |         |                           |            |
| ATOM 6065 | CA  | CA  | . ALA ALA ALA B B | 359 359 | . 122.162 109.318 -13.904 | 1.00 10.39 |
| 1 . .     |     |     |                   |         |                           |            |
| ATOM 6066 | CB  | CB  | . ALA ALA ALA B B | 359 359 | . 123.216 109.111 -12.825 | 1.00 9.95  |
| 1 . .     |     |     |                   |         |                           |            |
| ATOM 6067 | C   | C   | . ALA ALA ALA B B | 359 359 | . 122.060 108.055 -14.775 | 1.00 10.09 |
| 1 . .     |     |     |                   |         |                           |            |
| ATOM 6068 | O   | O   | . ALA ALA ALA B B | 359 359 | . 122.512 108.031 -15.934 | 1.00 11.35 |
| 1 . .     |     |     |                   |         |                           |            |
| ATOM 6069 | N   | N   | . GLN GLN GLN B B | 360 360 | . 121.452 106.990 -14.248 | 1.00 10.44 |
| 1 . .     |     |     |                   |         |                           |            |
| ATOM 6070 | CA  | CA  | . GLN GLN GLN B B | 360 360 | . 121.367 105.739 -15.013 | 1.00 11.20 |
| 1 . .     |     |     |                   |         |                           |            |
| ATOM 6071 | CB  | CB  | . GLN GLN GLN B B | 360 360 | . 120.738 104.637 -14.131 | 1.00 11.07 |
| 1 . .     |     |     |                   |         |                           |            |
| ATOM 6072 | CG  | CG  | . GLN GLN GLN B B | 360 360 | . 121.710 104.179 -13.045 | 1.00 13.61 |
| 1 . .     |     |     |                   |         |                           |            |
| ATOM 6073 | CD  | CD  | . GLN GLN GLN B B | 360 360 | . 121.082 103.237 -12.028 | 1.00 12.89 |
| 1 . .     |     |     |                   |         |                           |            |
| ATOM 6074 | OE1 | OE1 | . GLN GLN GLN B B | 360 360 | . 119.890 103.319 -11.715 | 1.00 14.36 |
| 1 . .     |     |     |                   |         |                           |            |
| ATOM 6075 | NE2 | NE2 | . GLN GLN GLN B B | 360 360 | . 121.915 102.373 -11.453 | 1.00 14.21 |
| 1 . .     |     |     |                   |         |                           |            |
| ATOM 6076 | C   | C   | . GLN GLN GLN B B | 360 360 | . 120.538 105.904 -16.282 | 1.00 11.70 |
| 1 . .     |     |     |                   |         |                           |            |
| ATOM 6077 | O   | O   | . GLN GLN GLN B B | 360 360 | . 120.904 105.327 -17.327 | 1.00 12.62 |
| 1 . .     |     |     |                   |         |                           |            |
| ATOM 6078 | N   | N   | . GLU GLU GLU B B | 361 361 | . 119.434 106.678 -16.191 | 1.00 11.05 |
| 1 . .     |     |     |                   |         |                           |            |





|           |     |     |                   |         |                          |           |
|-----------|-----|-----|-------------------|---------|--------------------------|-----------|
| ATOM 6139 | N   | N   | . SER SER SER B B | 369 369 | . 129.142 105.678 -2.533 | 1.00 5.25 |
| 1 . .     |     |     |                   |         |                          |           |
| ATOM 6140 | CA  | CA  | . SER SER SER B B | 369 369 | . 130.354 105.994 -1.799 | 1.00 6.01 |
| 1 . .     |     |     |                   |         |                          |           |
| ATOM 6141 | CB  | CB  | . SER SER SER B B | 369 369 | . 130.886 107.362 -2.370 | 1.00 7.42 |
| 1 . .     |     |     |                   |         |                          |           |
| ATOM 6142 | OG  | OG  | . SER SER SER B B | 369 369 | . 132.094 107.780 -1.698 | 1.00 7.74 |
| 1 . .     |     |     |                   |         |                          |           |
| ATOM 6143 | C   | C   | . SER SER SER B B | 369 369 | . 130.080 106.275 -0.321 | 1.00 6.67 |
| 1 . .     |     |     |                   |         |                          |           |
| ATOM 6144 | O   | O   | . SER SER SER B B | 369 369 | . 129.067 106.864 0.069  | 1.00 8.19 |
| 1 . .     |     |     |                   |         |                          |           |
| ATOM 6145 | N   | N   | . HIS HIS HIS B B | 370 370 | . 131.050 105.893 0.496  | 1.00 6.00 |
| 1 . .     |     |     |                   |         |                          |           |
| ATOM 6146 | CA  | CA  | . HIS HIS HIS B B | 370 370 | . 131.140 106.367 1.898  | 1.00 6.79 |
| 1 . .     |     |     |                   |         |                          |           |
| ATOM 6147 | CB  | CB  | . HIS HIS HIS B B | 370 370 | . 132.296 105.545 2.592  | 1.00 7.86 |
| 1 . .     |     |     |                   |         |                          |           |
| ATOM 6148 | CG  | CG  | . HIS HIS HIS B B | 370 370 | . 133.645 105.746 1.972  | 1.00 6.08 |
| 1 . .     |     |     |                   |         |                          |           |
| ATOM 6149 | ND1 | ND1 | . HIS HIS HIS B B | 370 370 | . 134.799 105.324 2.588  | 1.00 6.63 |
| 1 . .     |     |     |                   |         |                          |           |
| ATOM 6150 | CE1 | CE1 | . HIS HIS HIS B B | 370 370 | . 135.854 105.585 1.839  | 1.00 8.87 |
| 1 . .     |     |     |                   |         |                          |           |
| ATOM 6151 | NE2 | NE2 | . HIS HIS HIS B B | 370 370 | . 135.430 106.166 0.707  | 1.00 7.59 |
| 1 . .     |     |     |                   |         |                          |           |
| ATOM 6152 | CD2 | CD2 | . HIS HIS HIS B B | 370 370 | . 134.055 106.303 0.779  | 1.00 6.43 |
| 1 . .     |     |     |                   |         |                          |           |
| ATOM 6153 | C   | C   | . HIS HIS HIS B B | 370 370 | . 131.515 107.847 1.970  | 1.00 5.96 |
| 1 . .     |     |     |                   |         |                          |           |
| ATOM 6154 | O   | O   | . HIS HIS HIS B B | 370 370 | . 131.760 108.489 0.959  | 1.00 7.79 |
| 1 . .     |     |     |                   |         |                          |           |
| ATOM 6155 | N   | N   | . ARG ARG ARG B B | 371 371 | . 131.566 108.395 3.169  | 1.00 6.14 |
| 1 . .     |     |     |                   |         |                          |           |
| ATOM 6156 | CA  | CA  | . ARG ARG ARG B B | 371 371 | . 132.331 109.639 3.432  | 1.00 5.80 |
| 1 . .     |     |     |                   |         |                          |           |
| ATOM 6157 | CB  | CB  | . ARG ARG ARG B B | 371 371 | . 131.548 110.642 4.306  | 1.00 6.20 |
| 1 . .     |     |     |                   |         |                          |           |
| ATOM 6158 | CG  | CG  | . ARG ARG ARG B B | 371 371 | . 130.160 110.996 3.736  | 1.00 5.19 |
| 1 . .     |     |     |                   |         |                          |           |
| ATOM 6159 | CD  | CD  | . ARG ARG ARG B B | 371 371 | . 130.263 111.476 2.280  | 1.00 5.24 |
| 1 . .     |     |     |                   |         |                          |           |
| ATOM 6160 | NE  | NE  | . ARG ARG ARG B B | 371 371 | . 131.187 112.640 2.053  | 1.00 6.54 |
| 1 . .     |     |     |                   |         |                          |           |
| ATOM 6161 | CZ  | CZ  | . ARG ARG ARG B B | 371 371 | . 130.782 113.900 1.797  | 1.00 6.48 |
| 1 . .     |     |     |                   |         |                          |           |
| ATOM 6162 | NH1 | NH1 | . ARG ARG ARG B B | 371 371 | . 129.486 114.244 1.913  | 1.00 7.11 |
| 1 . .     |     |     |                   |         |                          |           |
| ATOM 6163 | NH2 | NH2 | . ARG ARG ARG B B | 371 371 | . 131.673 114.811 1.445  | 1.00 7.42 |
| 1 . .     |     |     |                   |         |                          |           |
| ATOM 6164 | C   | C   | . ARG ARG ARG B B | 371 371 | . 133.633 109.288 4.171  | 1.00 6.41 |
| 1 . .     |     |     |                   |         |                          |           |
| ATOM 6165 | O   | O   | . ARG ARG ARG B B | 371 371 | . 133.775 108.189 4.748  | 1.00 6.60 |
| 1 . .     |     |     |                   |         |                          |           |
| ATOM 6166 | N   | N   | . SER SER SER B B | 372 372 | . 134.570 110.229 4.208  | 1.00 6.75 |
| 1 . .     |     |     |                   |         |                          |           |
| ATOM 6167 | CA  | CA  | . SER SER SER B B | 372 372 | . 135.774 109.912 4.928  | 1.00 6.70 |
| 1 . .     |     |     |                   |         |                          |           |
| ATOM 6168 | CB  | CB  | . SER SER SER B B | 372 372 | . 136.822 110.950 4.590  | 1.00 7.23 |
| 1 . .     |     |     |                   |         |                          |           |

















|           |     |     |                   |         |                         |           |
|-----------|-----|-----|-------------------|---------|-------------------------|-----------|
| ATOM 6379 | O   | O   | . GLU GLU GLU B B | 401 401 | . 132.927 101.718 7.259 | 1.00 7.35 |
| 1 . .     |     |     |                   |         |                         |           |
| ATOM 6380 | N   | N   | . ARG ARG ARG B B | 402 402 | . 135.068 100.809 7.386 | 1.00 6.03 |
| 1 . .     |     |     |                   |         |                         |           |
| ATOM 6381 | CA  | CA  | . ARG ARG ARG B B | 402 402 | . 135.170 100.386 5.974 | 1.00 5.96 |
| 1 . .     |     |     |                   |         |                         |           |
| ATOM 6382 | CB  | CB  | . ARG ARG ARG B B | 402 402 | . 136.580 100.640 5.435 | 1.00 5.39 |
| 1 . .     |     |     |                   |         |                         |           |
| ATOM 6383 | CG  | CG  | . ARG ARG ARG B B | 402 402 | . 137.194 101.993 5.803 | 1.00 6.63 |
| 1 . .     |     |     |                   |         |                         |           |
| ATOM 6384 | CD  | CD  | . ARG ARG ARG B B | 402 402 | . 136.383 103.167 5.412 | 1.00 6.44 |
| 1 . .     |     |     |                   |         |                         |           |
| ATOM 6385 | NE  | NE  | . ARG ARG ARG B B | 402 402 | . 136.873 104.274 6.248 | 1.00 6.22 |
| 1 . .     |     |     |                   |         |                         |           |
| ATOM 6386 | CZ  | CZ  | . ARG ARG ARG B B | 402 402 | . 136.310 105.534 6.259 | 1.00 5.30 |
| 1 . .     |     |     |                   |         |                         |           |
| ATOM 6387 | NH1 | NH1 | . ARG ARG ARG B B | 402 402 | . 135.457 105.954 5.279 | 1.00 7.07 |
| 1 . .     |     |     |                   |         |                         |           |
| ATOM 6388 | NH2 | NH2 | . ARG ARG ARG B B | 402 402 | . 136.596 106.382 7.240 | 1.00 5.85 |
| 1 . .     |     |     |                   |         |                         |           |
| ATOM 6389 | C   | C   | . ARG ARG ARG B B | 402 402 | . 134.747 98.920 5.871  | 1.00 6.20 |
| 1 . .     |     |     |                   |         |                         |           |
| ATOM 6390 | O   | O   | . ARG ARG ARG B B | 402 402 | . 133.815 98.560 5.098  | 1.00 5.80 |
| 1 . .     |     |     |                   |         |                         |           |
| ATOM 6391 | N   | N   | . LEU LEU LEU B B | 403 403 | . 135.440 98.073 6.660  | 1.00 6.74 |
| 1 . .     |     |     |                   |         |                         |           |
| ATOM 6392 | CA  | CA  | . LEU LEU LEU B B | 403 403 | . 135.157 96.648 6.573  | 1.00 7.23 |
| 1 . .     |     |     |                   |         |                         |           |
| ATOM 6393 | CB  | CB  | . LEU LEU LEU B B | 403 403 | . 136.035 95.710 7.422  | 1.00 7.20 |
| 1 . .     |     |     |                   |         |                         |           |
| ATOM 6394 | CG  | CG  | . LEU LEU LEU B B | 403 403 | . 137.501 95.547 7.005  | 1.00 7.83 |
| 1 . .     |     |     |                   |         |                         |           |
| ATOM 6395 | CD1 | CD1 | . LEU LEU LEU B B | 403 403 | . 137.521 95.281 5.484  | 1.00 7.76 |
| 1 . .     |     |     |                   |         |                         |           |
| ATOM 6396 | CD2 | CD2 | . LEU LEU LEU B B | 403 403 | . 138.448 96.642 7.494  | 1.00 7.53 |
| 1 . .     |     |     |                   |         |                         |           |
| ATOM 6397 | C   | C   | . LEU LEU LEU B B | 403 403 | . 133.661 96.342 6.904  | 1.00 5.57 |
| 1 . .     |     |     |                   |         |                         |           |
| ATOM 6398 | O   | O   | . LEU LEU LEU B B | 403 403 | . 133.150 95.360 6.381  | 1.00 6.80 |
| 1 . .     |     |     |                   |         |                         |           |
| ATOM 6399 | N   | N   | . ALA ALA ALA B B | 404 404 | . 132.993 97.110 7.771  | 1.00 6.65 |
| 1 . .     |     |     |                   |         |                         |           |
| ATOM 6400 | CA  | CA  | . ALA ALA ALA B B | 404 404 | . 131.594 96.767 8.056  | 1.00 6.14 |
| 1 . .     |     |     |                   |         |                         |           |
| ATOM 6401 | CB  | CB  | . ALA ALA ALA B B | 404 404 | . 130.991 97.771 9.050  | 1.00 7.95 |
| 1 . .     |     |     |                   |         |                         |           |
| ATOM 6402 | C   | C   | . ALA ALA ALA B B | 404 404 | . 130.751 96.729 6.782  | 1.00 5.75 |
| 1 . .     |     |     |                   |         |                         |           |
| ATOM 6403 | O   | O   | . ALA ALA ALA B B | 404 404 | . 129.919 95.821 6.615  | 1.00 7.19 |
| 1 . .     |     |     |                   |         |                         |           |
| ATOM 6404 | N   | N   | . LYS LYS LYS B B | 405 405 | . 131.054 97.607 5.835  | 1.00 6.15 |
| 1 . .     |     |     |                   |         |                         |           |
| ATOM 6405 | CA  | CA  | . LYS LYS LYS B B | 405 405 | . 130.293 97.595 4.591  | 1.00 5.81 |
| 1 . .     |     |     |                   |         |                         |           |
| ATOM 6406 | CB  | CB  | . LYS LYS LYS B B | 405 405 | . 130.542 98.844 3.721  | 1.00 6.52 |
| 1 . .     |     |     |                   |         |                         |           |
| ATOM 6407 | CG  | CG  | . LYS LYS LYS B B | 405 405 | . 129.848 100.125 4.236 | 1.00 7.09 |
| 1 . .     |     |     |                   |         |                         |           |
| ATOM 6408 | CD  | CD  | . LYS LYS LYS B B | 405 405 | . 130.312 100.664 5.609 | 1.00 7.92 |
| 1 . .     |     |     |                   |         |                         |           |









































|      |      |   |   |   |     |     |     |   |   |     |     |   |         |         |         |      |       |   |
|------|------|---|---|---|-----|-----|-----|---|---|-----|-----|---|---------|---------|---------|------|-------|---|
| ATOM | 6949 | O | O | . | HOH | HOH | HOH | S | . | 300 | 300 | . | 117.696 | 116.117 | 22.084  | 1.00 | 21.21 |   |
| 1    | .    | . | . | . | .   | .   | .   | . | . | .   | .   | . | .       | .       | .       | .    | .     | . |
| ATOM | 6950 | O | O | . | HOH | HOH | HOH | S | . | 301 | 301 | . | 107.006 | 108.002 | 20.964  | 1.00 | 26.01 |   |
| 1    | .    | . | . | . | .   | .   | .   | . | . | .   | .   | . | .       | .       | .       | .    | .     | . |
| ATOM | 6951 | O | O | . | HOH | HOH | HOH | S | . | 302 | 302 | . | 157.559 | 86.117  | 41.589  | 1.00 | 24.66 |   |
| 1    | .    | . | . | . | .   | .   | .   | . | . | .   | .   | . | .       | .       | .       | .    | .     | . |
| ATOM | 6952 | O | O | . | HOH | HOH | HOH | S | . | 303 | 303 | . | 123.989 | 124.773 | -11.558 | 1.00 | 25.00 |   |
| 1    | .    | . | . | . | .   | .   | .   | . | . | .   | .   | . | .       | .       | .       | .    | .     | . |
| ATOM | 6953 | O | O | . | HOH | HOH | HOH | S | . | 304 | 304 | . | 134.384 | 113.096 | -27.688 | 1.00 | 22.02 |   |
| 1    | .    | . | . | . | .   | .   | .   | . | . | .   | .   | . | .       | .       | .       | .    | .     | . |
| ATOM | 6954 | O | O | . | HOH | HOH | HOH | S | . | 305 | 305 | . | 157.169 | 113.862 | -5.016  | 1.00 | 66.59 |   |
| 1    | .    | . | . | . | .   | .   | .   | . | . | .   | .   | . | .       | .       | .       | .    | .     | . |
| ATOM | 6955 | O | O | . | HOH | HOH | HOH | S | . | 306 | 306 | . | 156.687 | 93.813  | 15.851  | 1.00 | 27.37 |   |
| 1    | .    | . | . | . | .   | .   | .   | . | . | .   | .   | . | .       | .       | .       | .    | .     | . |
| ATOM | 6956 | O | O | . | HOH | HOH | HOH | S | . | 307 | 307 | . | 118.924 | 102.883 | 25.615  | 1.00 | 27.25 |   |
| 1    | .    | . | . | . | .   | .   | .   | . | . | .   | .   | . | .       | .       | .       | .    | .     | . |
| ATOM | 6957 | O | O | . | HOH | HOH | HOH | S | . | 308 | 308 | . | 116.438 | 104.258 | 21.816  | 1.00 | 25.10 |   |
| 1    | .    | . | . | . | .   | .   | .   | . | . | .   | .   | . | .       | .       | .       | .    | .     | . |
| ATOM | 6958 | O | O | . | HOH | HOH | HOH | S | . | 309 | 309 | . | 131.868 | 129.128 | 20.805  | 1.00 | 28.99 |   |
| 1    | .    | . | . | . | .   | .   | .   | . | . | .   | .   | . | .       | .       | .       | .    | .     | . |
| ATOM | 6959 | O | O | . | HOH | HOH | HOH | S | . | 310 | 310 | . | 153.003 | 121.410 | 19.952  | 1.00 | 24.45 |   |
| 1    | .    | . | . | . | .   | .   | .   | . | . | .   | .   | . | .       | .       | .       | .    | .     | . |
| ATOM | 6960 | O | O | . | HOH | HOH | HOH | S | . | 311 | 311 | . | 115.631 | 128.124 | 0.593   | 1.00 | 28.64 |   |
| 1    | .    | . | . | . | .   | .   | .   | . | . | .   | .   | . | .       | .       | .       | .    | .     | . |
| ATOM | 6961 | O | O | . | HOH | HOH | HOH | S | . | 312 | 312 | . | 136.213 | 85.413  | 2.897   | 1.00 | 18.58 |   |
| 1    | .    | . | . | . | .   | .   | .   | . | . | .   | .   | . | .       | .       | .       | .    | .     | . |
| ATOM | 6962 | O | O | . | HOH | HOH | HOH | S | . | 313 | 313 | . | 134.012 | 70.009  | 10.752  | 1.00 | 23.13 |   |
| 1    | .    | . | . | . | .   | .   | .   | . | . | .   | .   | . | .       | .       | .       | .    | .     | . |
| ATOM | 6963 | O | O | . | HOH | HOH | HOH | S | . | 314 | 314 | . | 121.480 | 111.811 | -22.065 | 1.00 | 24.99 |   |
| 1    | .    | . | . | . | .   | .   | .   | . | . | .   | .   | . | .       | .       | .       | .    | .     | . |
| ATOM | 6964 | O | O | . | HOH | HOH | HOH | S | . | 315 | 315 | . | 126.009 | 92.704  | -10.545 | 1.00 | 27.42 |   |
| 1    | .    | . | . | . | .   | .   | .   | . | . | .   | .   | . | .       | .       | .       | .    | .     | . |
| ATOM | 6965 | O | O | . | HOH | HOH | HOH | S | . | 316 | 316 | . | 154.576 | 90.342  | 17.579  | 1.00 | 23.29 |   |
| 1    | .    | . | . | . | .   | .   | .   | . | . | .   | .   | . | .       | .       | .       | .    | .     | . |
| ATOM | 6966 | O | O | . | HOH | HOH | HOH | S | . | 317 | 317 | . | 135.189 | 76.956  | 5.608   | 1.00 | 22.87 |   |
| 1    | .    | . | . | . | .   | .   | .   | . | . | .   | .   | . | .       | .       | .       | .    | .     | . |
| ATOM | 6967 | O | O | . | HOH | HOH | HOH | S | . | 318 | 318 | . | 128.556 | 126.036 | 0.998   | 1.00 | 25.39 |   |
| 1    | .    | . | . | . | .   | .   | .   | . | . | .   | .   | . | .       | .       | .       | .    | .     | . |
| ATOM | 6968 | O | O | . | HOH | HOH | HOH | S | . | 319 | 319 | . | 154.987 | 97.836  | 14.091  | 1.00 | 25.73 |   |
| 1    | .    | . | . | . | .   | .   | .   | . | . | .   | .   | . | .       | .       | .       | .    | .     | . |
| ATOM | 6969 | O | O | . | HOH | HOH | HOH | S | . | 320 | 320 | . | 139.718 | 78.065  | 31.852  | 1.00 | 22.43 |   |
| 1    | .    | . | . | . | .   | .   | .   | . | . | .   | .   | . | .       | .       | .       | .    | .     | . |
| ATOM | 6970 | O | O | . | HOH | HOH | HOH | S | . | 321 | 321 | . | 166.248 | 93.141  | 19.113  | 1.00 | 20.84 |   |
| 1    | .    | . | . | . | .   | .   | .   | . | . | .   | .   | . | .       | .       | .       | .    | .     | . |
| ATOM | 6971 | O | O | . | HOH | HOH | HOH | S | . | 322 | 322 | . | 153.432 | 87.938  | 17.816  | 1.00 | 22.27 |   |
| 1    | .    | . | . | . | .   | .   | .   | . | . | .   | .   | . | .       | .       | .       | .    | .     | . |
| ATOM | 6972 | O | O | . | HOH | HOH | HOH | S | . | 323 | 323 | . | 148.522 | 84.980  | 11.816  | 1.00 | 34.29 |   |
| 1    | .    | . | . | . | .   | .   | .   | . | . | .   | .   | . | .       | .       | .       | .    | .     | . |
| ATOM | 6973 | O | O | . | HOH | HOH | HOH | S | . | 324 | 324 | . | 137.833 | 75.485  | 31.432  | 1.00 | 24.96 |   |
| 1    | .    | . | . | . | .   | .   | .   | . | . | .   | .   | . | .       | .       | .       | .    | .     | . |
| ATOM | 6974 | O | O | . | HOH | HOH | HOH | S | . | 325 | 325 | . | 125.008 | 95.614  | 9.531   | 1.00 | 23.77 |   |
| 1    | .    | . | . | . | .   | .   | .   | . | . | .   | .   | . | .       | .       | .       | .    | .     | . |
| ATOM | 6975 | O | O | . | HOH | HOH | HOH | S | . | 326 | 326 | . | 153.920 | 123.763 | -11.159 | 1.00 | 24.52 |   |
| 1    | .    | . | . | . | .   | .   | .   | . | . | .   | .   | . | .       | .       | .       | .    | .     | . |

#  
loop\_  
\_atom\_site\_anisotrop.id  
\_atom\_site\_anisotrop.pdbx\_auth\_atom\_id  
\_atom\_site\_anisotrop.pdbx\_label\_atom\_id  
\_atom\_site\_anisotrop.pdbx\_label\_alt\_id

```

_atom_site_anisotrop.pdbx_auth_comp_id
_atom_site_anisotrop.pdbx_label_comp_id
_atom_site_anisotrop.pdbx_orig_comp_id
_atom_site_anisotrop.pdbx_auth_asym_id
_atom_site_anisotrop.pdbx_label_asym_id
_atom_site_anisotrop.pdbx_auth_seq_id
_atom_site_anisotrop.pdbx_label_seq_id
_atom_site_anisotrop.pdbx_PDB_ins_code
_atom_site_anisotrop.U[1][1]
_atom_site_anisotrop.U[2][2]
_atom_site_anisotrop.U[3][3]
_atom_site_anisotrop.U[1][2]
_atom_site_anisotrop.U[1][3]
_atom_site_anisotrop.U[2][3]
_atom_site_anisotrop.pdbx_PDB_model_num
_atom_site_anisotrop.type_symbol
1  N  N  . SER SER SER A A 1 1  . 0.1823 0.2377 0.2676 0.0498 0.0662
0.0045 1 .
2  CA  CA  . SER SER SER A A 1 1  . 0.1940 0.2388 0.2431 0.0158 0.0454
0.0245 1 .
3  CB  CB  . SER SER SER A A 1 1  . 0.2157 0.2634 0.2686 0.0112 0.0089
0.0149 1 .
4  OG  OG  . SER SER SER A A 1 1  . 0.2515 0.3414 0.2832 0.0007 0.0017
0.0315 1 .
5  C  C  . SER SER SER A A 1 1  . 0.1853 0.2461 0.2471 0.0130 0.0454
0.0400 1 .
6  O  O  . SER SER SER A A 1 1  . 0.1927 0.2405 0.2649 0.0159 0.0811
0.0569 1 .
7  N  N  . ILE ILE ILE A A 2 2  . 0.1620 0.1809 0.1861 0.0065 0.0360
0.0312 1 .
8  CA  CA  . ILE ILE ILE A A 2 2  . 0.1451 0.1570 0.1543 -0.0164 0.0318
0.0272 1 .
9  CB  CB  . ILE ILE ILE A A 2 2  . 0.1622 0.1364 0.1550 0.0018 0.0008 -
0.0042 1 .
10 CG1  CG1  . ILE ILE ILE A A 2 2  . 0.1730 0.1571 0.1494 -0.0126 0.0015 -
0.0210 1 .
11 CD  CD  . ILE ILE ILE A A 2 2  . 0.1939 0.2056 0.2232 0.0066 -0.0046 -
0.0330 1 .
12 CG2  CG2  . ILE ILE ILE A A 2 2  . 0.1763 0.1436 0.1560 0.0077 0.0155
0.0254 1 .
13 C  C  . ILE ILE ILE A A 2 2  . 0.1242 0.1569 0.1700 -0.0151 0.0203
0.0121 1 .
14 O  O  . ILE ILE ILE A A 2 2  . 0.1793 0.1834 0.1852 -0.0176 0.0288
0.0032 1 .
15 N  N  . GLN GLN GLN A A 3 3  . 0.1262 0.1518 0.1691 -0.0319 0.0144 -
0.0043 1 .
16 CA  CA  . GLN GLN GLN A A 3 3  . 0.1678 0.1680 0.1763 -0.0127 0.0091 -
0.0158 1 .
17 CB  CB  . GLN GLN GLN A A 3 3  . 0.1640 0.1996 0.2244 0.0043 0.0120 -
0.0200 1 .
18 CG  CG  . GLN GLN GLN A A 3 3  . 0.2203 0.2220 0.2586 0.0031 0.0600
0.0020 1 .
19 CD  CD  . GLN GLN GLN A A 3 3  . 0.3047 0.3985 0.3820 -0.0067 0.0125
0.0315 1 .
20 OE1  OE1  . GLN GLN GLN A A 3 3  . 0.4256 0.4193 0.4853 0.0525 0.0161
0.0689 1 .
21 NE2  NE2  . GLN GLN GLN A A 3 3  . 0.2927 0.5140 0.4445 -0.0267 0.0510 -
0.0338 1 .
22 C  C  . GLN GLN GLN A A 3 3  . 0.1685 0.1753 0.1809 -0.0388 0.0206 -
0.0237 1 .

```





|        |     |     |                         |                                          |
|--------|-----|-----|-------------------------|------------------------------------------|
| 53     | C   | C   | . TRP TRP TRP A A 6 6   | . 0.1116 0.1026 0.1063 0.0011 -0.0120    |
| 0.0000 | 1   | .   |                         |                                          |
| 54     | O   | O   | . TRP TRP TRP A A 6 6   | . 0.0995 0.1081 0.1303 0.0099 0.0110 -   |
| 0.0222 | 1   | .   |                         |                                          |
| 55     | N   | N   | . ALA ALA ALA A A 7 7   | . 0.0910 0.0946 0.0923 -0.0136 0.0092    |
| 0.0066 | 1   | .   |                         |                                          |
| 56     | CA  | CA  | . ALA ALA ALA A A 7 7   | . 0.0854 0.0943 0.0806 -0.0073 -0.0036 - |
| 0.0035 | 1   | .   |                         |                                          |
| 57     | CB  | CB  | . ALA ALA ALA A A 7 7   | . 0.1188 0.1229 0.0931 -0.0013 -0.0290   |
| 0.0249 | 1   | .   |                         |                                          |
| 58     | C   | C   | . ALA ALA ALA A A 7 7   | . 0.1011 0.0805 0.0766 -0.0105 -0.0119   |
| 0.0009 | 1   | .   |                         |                                          |
| 59     | O   | O   | . ALA ALA ALA A A 7 7   | . 0.1128 0.0873 0.0879 -0.0147 -0.0038 - |
| 0.0050 | 1   | .   |                         |                                          |
| 60     | N   | N   | . ARG ARG ARG A A 8 8   | . 0.1063 0.0954 0.0941 -0.0160 0.0061 -  |
| 0.0095 | 1   | .   |                         |                                          |
| 61     | CA  | CA  | . ARG ARG ARG A A 8 8   | . 0.1146 0.0986 0.0808 -0.0140 0.0017    |
| 0.0085 | 1   | .   |                         |                                          |
| 62     | CB  | CB  | . ARG ARG ARG A A 8 8   | . 0.1150 0.0742 0.1022 -0.0062 0.0056    |
| 0.0176 | 1   | .   |                         |                                          |
| 63     | CG  | CG  | . ARG ARG ARG A A 8 8   | . 0.1383 0.0916 0.1234 0.0160 -0.0048    |
| 0.0160 | 1   | .   |                         |                                          |
| 64     | CD  | CD  | . ARG ARG ARG A A 8 8   | . 0.0902 0.1047 0.1164 -0.0109 -0.0121   |
| 0.0453 | 1   | .   |                         |                                          |
| 65     | NE  | NE  | . ARG ARG ARG A A 8 8   | . 0.0951 0.1192 0.1267 0.0058 0.0097     |
| 0.0137 | 1   | .   |                         |                                          |
| 66     | CZ  | CZ  | . ARG ARG ARG A A 8 8   | . 0.0846 0.1091 0.1278 0.0077 0.0055     |
| 0.0082 | 1   | .   |                         |                                          |
| 67     | NH1 | NH1 | . ARG ARG ARG A A 8 8   | . 0.1163 0.1320 0.1588 -0.0137 0.0187    |
| 0.0099 | 1   | .   |                         |                                          |
| 68     | NH2 | NH2 | . ARG ARG ARG A A 8 8   | . 0.1663 0.1565 0.2354 -0.0159 -0.0289 - |
| 0.0312 | 1   | .   |                         |                                          |
| 69     | C   | C   | . ARG ARG ARG A A 8 8   | . 0.1089 0.0763 0.0859 -0.0127 0.0123    |
| 0.0046 | 1   | .   |                         |                                          |
| 70     | O   | O   | . ARG ARG ARG A A 8 8   | . 0.0958 0.0854 0.0876 -0.0143 0.0002    |
| 0.0003 | 1   | .   |                         |                                          |
| 71     | N   | N   | . GLU GLU GLU A A 9 9   | . 0.1008 0.0996 0.1027 -0.0090 0.0097    |
| 0.0106 | 1   | .   |                         |                                          |
| 72     | CA  | CA  | . GLU GLU GLU A A 9 9   | . 0.0980 0.0904 0.1198 -0.0057 0.0006    |
| 0.0056 | 1   | .   |                         |                                          |
| 73     | CB  | CB  | . GLU GLU GLU A A 9 9   | . 0.1522 0.1810 0.0966 -0.0248 0.0182 -  |
| 0.0136 | 1   | .   |                         |                                          |
| 74     | CG  | CG  | . GLU GLU GLU A A 9 9   | . 0.2100 0.2707 0.1381 0.0168 0.0143 -   |
| 0.0152 | 1   | .   |                         |                                          |
| 75     | CD  | CD  | . GLU GLU GLU A A 9 9   | . 0.1860 0.2151 0.1884 0.0439 0.0069 -   |
| 0.0061 | 1   | .   |                         |                                          |
| 76     | OE1 | OE1 | . GLU GLU GLU A A 9 9   | . 0.1728 0.1564 0.1174 0.0449 0.0293     |
| 0.0060 | 1   | .   |                         |                                          |
| 77     | OE2 | OE2 | . GLU GLU GLU A A 9 9   | . 0.1979 0.2183 0.1739 0.0650 0.0071 -   |
| 0.0130 | 1   | .   |                         |                                          |
| 78     | C   | C   | . GLU GLU GLU A A 9 9   | . 0.1303 0.1121 0.1148 -0.0176 -0.0197   |
| 0.0161 | 1   | .   |                         |                                          |
| 79     | O   | O   | . GLU GLU GLU A A 9 9   | . 0.2552 0.1123 0.1790 -0.0282 -0.0797   |
| 0.0360 | 1   | .   |                         |                                          |
| 80     | N   | N   | . ILE ILE ILE A A 10 10 | . 0.1007 0.0770 0.0773 -0.0082 0.0004    |
| 0.0160 | 1   | .   |                         |                                          |
| 81     | CA  | CA  | . ILE ILE ILE A A 10 10 | . 0.0832 0.0871 0.0952 0.0060 -0.0069    |
| 0.0137 | 1   | .   |                         |                                          |
| 82     | CB  | CB  | . ILE ILE ILE A A 10 10 | . 0.0900 0.0859 0.0930 0.0223 -0.0143    |
| 0.0133 | 1   | .   |                         |                                          |

|        |     |     |                         |                                          |
|--------|-----|-----|-------------------------|------------------------------------------|
| 83     | CG1 | CG1 | . ILE ILE ILE A A 10 10 | . 0.1141 0.1061 0.0919 0.0389 -0.0078    |
| 0.0151 | 1   | .   |                         |                                          |
| 84     | CD  | CD  | . ILE ILE ILE A A 10 10 | . 0.1816 0.0904 0.1204 -0.0057 0.0149 -  |
| 0.0086 | 1   | .   |                         |                                          |
| 85     | CG2 | CG2 | . ILE ILE ILE A A 10 10 | . 0.1166 0.1120 0.1423 -0.0025 0.0026    |
| 0.0153 | 1   | .   |                         |                                          |
| 86     | C   | C   | . ILE ILE ILE A A 10 10 | . 0.0855 0.0622 0.0968 -0.0008 -0.0003   |
| 0.0161 | 1   | .   |                         |                                          |
| 87     | O   | O   | . ILE ILE ILE A A 10 10 | . 0.1020 0.1038 0.1063 0.0011 0.0105     |
| 0.0148 | 1   | .   |                         |                                          |
| 88     | N   | N   | . LEU LEU LEU A A 11 11 | . 0.0936 0.0640 0.0828 -0.0198 0.0012    |
| 0.0270 | 1   | .   |                         |                                          |
| 89     | CA  | CA  | . LEU LEU LEU A A 11 11 | . 0.0715 0.0831 0.0727 -0.0206 0.0144    |
| 0.0104 | 1   | .   |                         |                                          |
| 90     | CB  | CB  | . LEU LEU LEU A A 11 11 | . 0.0880 0.0832 0.0786 -0.0054 0.0085    |
| 0.0021 | 1   | .   |                         |                                          |
| 91     | CG  | CG  | . LEU LEU LEU A A 11 11 | . 0.1154 0.0703 0.0756 -0.0006 0.0138    |
| 0.0026 | 1   | .   |                         |                                          |
| 92     | CD1 | CD1 | . LEU LEU LEU A A 11 11 | . 0.0952 0.0993 0.1011 -0.0156 0.0325 -  |
| 0.0041 | 1   | .   |                         |                                          |
| 93     | CD2 | CD2 | . LEU LEU LEU A A 11 11 | . 0.1674 0.1125 0.1284 0.0262 0.0367     |
| 0.0072 | 1   | .   |                         |                                          |
| 94     | C   | C   | . LEU LEU LEU A A 11 11 | . 0.0767 0.0783 0.0728 -0.0057 0.0137    |
| 0.0116 | 1   | .   |                         |                                          |
| 95     | O   | O   | . LEU LEU LEU A A 11 11 | . 0.0752 0.0923 0.0893 -0.0006 -0.0002   |
| 0.0045 | 1   | .   |                         |                                          |
| 96     | N   | N   | . ASP ASP ASP A A 12 12 | . 0.0845 0.0779 0.0673 -0.0060 -0.0142 - |
| 0.0033 | 1   | .   |                         |                                          |
| 97     | CA  | CA  | . ASP ASP ASP A A 12 12 | . 0.0989 0.0715 0.0686 -0.0016 -0.0076 - |
| 0.0084 | 1   | .   |                         |                                          |
| 98     | CB  | CB  | . ASP ASP ASP A A 12 12 | . 0.0838 0.0571 0.1063 0.0141 -0.0037    |
| 0.0225 | 1   | .   |                         |                                          |
| 99     | CG  | CG  | . ASP ASP ASP A A 12 12 | . 0.1407 0.1076 0.1070 -0.0047 0.0070 -  |
| 0.0061 | 1   | .   |                         |                                          |
| 100    | OD1 | OD1 | . ASP ASP ASP A A 12 12 | . 0.1010 0.1047 0.1031 0.0002 0.0140     |
| 0.0033 | 1   | .   |                         |                                          |
| 101    | OD2 | OD2 | . ASP ASP ASP A A 12 12 | . 0.1092 0.1113 0.1266 0.0052 -0.0102    |
| 0.0065 | 1   | .   |                         |                                          |
| 102    | C   | C   | . ASP ASP ASP A A 12 12 | . 0.0813 0.0711 0.0754 0.0132 0.0092     |
| 0.0008 | 1   | .   |                         |                                          |
| 103    | O   | O   | . ASP ASP ASP A A 12 12 | . 0.0794 0.0752 0.0844 0.0059 -0.0024 -  |
| 0.0058 | 1   | .   |                         |                                          |
| 104    | N   | N   | . SER SER SER A A 13 13 | . 0.0832 0.0650 0.0844 0.0113 0.0047 -   |
| 0.0032 | 1   | .   |                         |                                          |
| 105    | CA  | CA  | . SER SER SER A A 13 13 | . 0.0923 0.0737 0.0889 -0.0104 0.0245 -  |
| 0.0203 | 1   | .   |                         |                                          |
| 106    | CB  | CB  | . SER SER SER A A 13 13 | . 0.1219 0.0821 0.0674 0.0206 -0.0179 -  |
| 0.0216 | 1   | .   |                         |                                          |
| 107    | OG  | OG  | . SER SER SER A A 13 13 | . 0.0834 0.0903 0.0824 0.0119 -0.0051    |
| 0.0029 | 1   | .   |                         |                                          |
| 108    | C   | C   | . SER SER SER A A 13 13 | . 0.0855 0.0773 0.0898 0.0061 0.0007     |
| 0.0024 | 1   | .   |                         |                                          |
| 109    | O   | O   | . SER SER SER A A 13 13 | . 0.0947 0.0797 0.0880 -0.0050 -0.0030   |
| 0.0116 | 1   | .   |                         |                                          |
| 110    | N   | N   | . ARG ARG ARG A A 14 14 | . 0.0791 0.0841 0.0905 0.0061 0.0106 -   |
| 0.0029 | 1   | .   |                         |                                          |
| 111    | CA  | CA  | . ARG ARG ARG A A 14 14 | . 0.0598 0.0936 0.0695 0.0184 0.0065 -   |
| 0.0061 | 1   | .   |                         |                                          |
| 112    | CB  | CB  | . ARG ARG ARG A A 14 14 | . 0.1002 0.1541 0.1310 0.0073 -0.0140 -  |
| 0.0027 | 1   | .   |                         |                                          |





|        |     |     |                         |                                          |
|--------|-----|-----|-------------------------|------------------------------------------|
| 173    | CG  | CG  | . ASP ASP ASP A A 22 22 | . 0.1140 0.1458 0.1271 0.0047 0.0367 -   |
| 0.0190 | 1   | .   |                         |                                          |
| 174    | OD1 | OD1 | . ASP ASP ASP A A 22 22 | . 0.1792 0.1907 0.1441 -0.0170 -0.0124   |
| 0.0055 | 1   | .   |                         |                                          |
| 175    | OD2 | OD2 | . ASP ASP ASP A A 22 22 | . 0.1601 0.1436 0.1367 -0.0091 0.0065    |
| 0.0095 | 1   | .   |                         |                                          |
| 176    | C   | C   | . ASP ASP ASP A A 22 22 | . 0.1043 0.0934 0.1084 0.0044 0.0186 -   |
| 0.0020 | 1   | .   |                         |                                          |
| 177    | O   | O   | . ASP ASP ASP A A 22 22 | . 0.1199 0.0816 0.1358 0.0074 0.0248 -   |
| 0.0224 | 1   | .   |                         |                                          |
| 178    | N   | N   | . LEU LEU LEU A A 23 23 | . 0.1002 0.1004 0.0938 0.0026 0.0169     |
| 0.0224 | 1   | .   |                         |                                          |
| 179    | CA  | CA  | . LEU LEU LEU A A 23 23 | . 0.0943 0.0724 0.1052 0.0044 0.0064     |
| 0.0163 | 1   | .   |                         |                                          |
| 180    | CB  | CB  | . LEU LEU LEU A A 23 23 | . 0.1259 0.1071 0.1047 -0.0129 -0.0133   |
| 0.0087 | 1   | .   |                         |                                          |
| 181    | CG  | CG  | . LEU LEU LEU A A 23 23 | . 0.1207 0.1314 0.1101 -0.0029 0.0190    |
| 0.0220 | 1   | .   |                         |                                          |
| 182    | CD1 | CD1 | . LEU LEU LEU A A 23 23 | . 0.1541 0.2015 0.1336 -0.0065 0.0153 -  |
| 0.0065 | 1   | .   |                         |                                          |
| 183    | CD2 | CD2 | . LEU LEU LEU A A 23 23 | . 0.1204 0.1129 0.1577 -0.0074 0.0393    |
| 0.0183 | 1   | .   |                         |                                          |
| 184    | C   | C   | . LEU LEU LEU A A 23 23 | . 0.1112 0.1185 0.1029 -0.0107 0.0099    |
| 0.0024 | 1   | .   |                         |                                          |
| 185    | O   | O   | . LEU LEU LEU A A 23 23 | . 0.1191 0.0954 0.1475 -0.0037 0.0045 -  |
| 0.0153 | 1   | .   |                         |                                          |
| 186    | N   | N   | . TYR TYR TYR A A 24 24 | . 0.1292 0.1239 0.1380 -0.0245 0.0075 -  |
| 0.0003 | 1   | .   |                         |                                          |
| 187    | CA  | CA  | . TYR TYR TYR A A 24 24 | . 0.1126 0.1390 0.1335 -0.0143 0.0104    |
| 0.0086 | 1   | .   |                         |                                          |
| 188    | CB  | CB  | . TYR TYR TYR A A 24 24 | . 0.1098 0.1399 0.1164 -0.0020 0.0134    |
| 0.0093 | 1   | .   |                         |                                          |
| 189    | CG  | CG  | . TYR TYR TYR A A 24 24 | . 0.1492 0.1284 0.1672 0.0002 -0.0047    |
| 0.0370 | 1   | .   |                         |                                          |
| 190    | CD1 | CD1 | . TYR TYR TYR A A 24 24 | . 0.1605 0.1936 0.1827 -0.0488 -0.0062   |
| 0.0169 | 1   | .   |                         |                                          |
| 191    | CE1 | CE1 | . TYR TYR TYR A A 24 24 | . 0.1896 0.1837 0.1928 -0.0019 -0.0059   |
| 0.0292 | 1   | .   |                         |                                          |
| 192    | CZ  | CZ  | . TYR TYR TYR A A 24 24 | . 0.1900 0.2333 0.2211 0.0068 0.0077     |
| 0.1068 | 1   | .   |                         |                                          |
| 193    | OH  | OH  | . TYR TYR TYR A A 24 24 | . 0.2540 0.2530 0.2441 -0.0164 -0.0093   |
| 0.1194 | 1   | .   |                         |                                          |
| 194    | CE2 | CE2 | . TYR TYR TYR A A 24 24 | . 0.2184 0.2744 0.2388 0.0192 0.0249     |
| 0.1099 | 1   | .   |                         |                                          |
| 195    | CD2 | CD2 | . TYR TYR TYR A A 24 24 | . 0.2101 0.2352 0.1761 0.0052 -0.0099    |
| 0.0711 | 1   | .   |                         |                                          |
| 196    | C   | C   | . TYR TYR TYR A A 24 24 | . 0.1098 0.1375 0.1386 -0.0048 0.0018    |
| 0.0100 | 1   | .   |                         |                                          |
| 197    | O   | O   | . TYR TYR TYR A A 24 24 | . 0.1288 0.1343 0.1604 -0.0185 -0.0034   |
| 0.0056 | 1   | .   |                         |                                          |
| 198    | N   | N   | . THR THR THR A A 25 25 | . 0.1290 0.1550 0.1609 -0.0371 0.0241 -  |
| 0.0129 | 1   | .   |                         |                                          |
| 199    | CA  | CA  | . THR THR THR A A 25 25 | . 0.1394 0.1769 0.1704 -0.0254 0.0169    |
| 0.0038 | 1   | .   |                         |                                          |
| 200    | CB  | CB  | . THR THR THR A A 25 25 | . 0.1364 0.1553 0.1815 -0.0221 0.0153 -  |
| 0.0031 | 1   | .   |                         |                                          |
| 201    | OG1 | OG1 | . THR THR THR A A 25 25 | . 0.1501 0.1743 0.1977 -0.0021 -0.0016 - |
| 0.0025 | 1   | .   |                         |                                          |
| 202    | CG2 | CG2 | . THR THR THR A A 25 25 | . 0.1506 0.1598 0.1802 0.0043 -0.0032 -  |
| 0.0116 | 1   | .   |                         |                                          |

|        |     |     |                           |        |        |        |         |         |   |
|--------|-----|-----|---------------------------|--------|--------|--------|---------|---------|---|
| 203    | C   | C   | . THR THR THR A A 25 25 . | 0.1921 | 0.2229 | 0.2076 | -0.0235 | 0.0214  |   |
| 0.0240 | 1   | .   |                           |        |        |        |         |         |   |
| 204    | O   | O   | . THR THR THR A A 25 25 . | 0.2016 | 0.2195 | 0.2118 | -0.0459 | 0.0127  |   |
| 0.0159 | 1   | .   |                           |        |        |        |         |         |   |
| 205    | N   | N   | . ALA ALA ALA A A 26 26 . | 0.1375 | 0.2444 | 0.2254 | -0.0347 | 0.0333  |   |
| 0.0102 | 1   | .   |                           |        |        |        |         |         |   |
| 206    | CA  | CA  | . ALA ALA ALA A A 26 26 . | 0.1788 | 0.2691 | 0.2756 | -0.0105 | 0.0440  |   |
| 0.0209 | 1   | .   |                           |        |        |        |         |         |   |
| 207    | CB  | CB  | . ALA ALA ALA A A 26 26 . | 0.1925 | 0.2705 | 0.2694 | -0.0193 | 0.0528  |   |
| 0.0494 | 1   | .   |                           |        |        |        |         |         |   |
| 208    | C   | C   | . ALA ALA ALA A A 26 26 . | 0.1939 | 0.2629 | 0.2896 | 0.0027  | 0.0265  |   |
| 0.0312 | 1   | .   |                           |        |        |        |         |         |   |
| 209    | O   | O   | . ALA ALA ALA A A 26 26 . | 0.2040 | 0.2848 | 0.3596 | -0.0112 | -0.0193 |   |
| 0.0277 | 1   | .   |                           |        |        |        |         |         |   |
| 210    | N   | N   | . LYS LYS LYS A A 27 27 . | 0.2152 | 0.2609 | 0.2772 | 0.0005  | 0.0547  |   |
| 0.0260 | 1   | .   |                           |        |        |        |         |         |   |
| 211    | CA  | CA  | . LYS LYS LYS A A 27 27 . | 0.2392 | 0.2671 | 0.2889 | 0.0113  | 0.0522  |   |
| 0.0291 | 1   | .   |                           |        |        |        |         |         |   |
| 212    | CB  | CB  | . LYS LYS LYS A A 27 27 . | 0.2559 | 0.2875 | 0.2977 | -0.0072 | 0.0566  |   |
| 0.0168 | 1   | .   |                           |        |        |        |         |         |   |
| 213    | CG  | CG  | . LYS LYS LYS A A 27 27 . | 0.3126 | 0.3012 | 0.3188 | -0.0014 | 0.0957  |   |
| 0.0244 | 1   | .   |                           |        |        |        |         |         |   |
| 214    | CD  | CD  | . LYS LYS LYS A A 27 27 . | 0.4146 | 0.4105 | 0.4669 | 0.0473  | 0.0481  | - |
| 0.0069 | 1   | .   |                           |        |        |        |         |         |   |
| 215    | CE  | CE  | . LYS LYS LYS A A 27 27 . | 0.5149 | 0.3988 | 0.4429 | -0.0453 | 0.0379  |   |
| 0.0247 | 1   | .   |                           |        |        |        |         |         |   |
| 216    | NZ  | NZ  | . LYS LYS LYS A A 27 27 . | 0.4678 | 0.3914 | 0.5564 | 0.0346  | 0.0085  |   |
| 0.0090 | 1   | .   |                           |        |        |        |         |         |   |
| 217    | C   | C   | . LYS LYS LYS A A 27 27 . | 0.2378 | 0.2568 | 0.3139 | 0.0103  | 0.0474  |   |
| 0.0277 | 1   | .   |                           |        |        |        |         |         |   |
| 218    | O   | O   | . LYS LYS LYS A A 27 27 . | 0.2874 | 0.2867 | 0.3746 | 0.0304  | 0.0398  |   |
| 0.0441 | 1   | .   |                           |        |        |        |         |         |   |
| 219    | N   | N   | . GLY GLY GLY A A 28 28 . | 0.1964 | 0.2235 | 0.2761 | -0.0026 | 0.0250  |   |
| 0.0402 | 1   | .   |                           |        |        |        |         |         |   |
| 220    | CA  | CA  | . GLY GLY GLY A A 28 28 . | 0.1616 | 0.2363 | 0.2708 | 0.0224  | 0.0371  |   |
| 0.0286 | 1   | .   |                           |        |        |        |         |         |   |
| 221    | C   | C   | . GLY GLY GLY A A 28 28 . | 0.1132 | 0.1821 | 0.2018 | 0.0174  | 0.0278  |   |
| 0.0413 | 1   | .   |                           |        |        |        |         |         |   |
| 222    | O   | O   | . GLY GLY GLY A A 28 28 . | 0.1451 | 0.1610 | 0.1770 | -0.0062 | 0.0045  |   |
| 0.0088 | 1   | .   |                           |        |        |        |         |         |   |
| 223    | N   | N   | . LEU LEU LEU A A 29 29 . | 0.1557 | 0.1817 | 0.2121 | -0.0005 | 0.0139  |   |
| 0.0361 | 1   | .   |                           |        |        |        |         |         |   |
| 224    | CA  | CA  | . LEU LEU LEU A A 29 29 . | 0.1498 | 0.1794 | 0.1785 | -0.0115 | 0.0100  |   |
| 0.0258 | 1   | .   |                           |        |        |        |         |         |   |
| 225    | CB  | CB  | . LEU LEU LEU A A 29 29 . | 0.1920 | 0.1991 | 0.1589 | 0.0015  | 0.0155  |   |
| 0.0393 | 1   | .   |                           |        |        |        |         |         |   |
| 226    | CG  | CG  | . LEU LEU LEU A A 29 29 . | 0.2107 | 0.3145 | 0.1497 | -0.0547 | 0.0258  |   |
| 0.0089 | 1   | .   |                           |        |        |        |         |         |   |
| 227    | CD1 | CD1 | . LEU LEU LEU A A 29 29 . | 0.3108 | 0.4212 | 0.2052 | -0.0048 | 0.0325  |   |
| 0.0682 | 1   | .   |                           |        |        |        |         |         |   |
| 228    | CD2 | CD2 | . LEU LEU LEU A A 29 29 . | 0.3037 | 0.3384 | 0.2019 | -0.0494 | 0.0032  |   |
| 0.0152 | 1   | .   |                           |        |        |        |         |         |   |
| 229    | C   | C   | . LEU LEU LEU A A 29 29 . | 0.1487 | 0.1538 | 0.1811 | -0.0091 | 0.0136  |   |
| 0.0068 | 1   | .   |                           |        |        |        |         |         |   |
| 230    | O   | O   | . LEU LEU LEU A A 29 29 . | 0.1590 | 0.1958 | 0.2365 | 0.0182  | -0.0003 |   |
| 0.0054 | 1   | .   |                           |        |        |        |         |         |   |
| 231    | N   | N   | . PHE PHE PHE A A 30 30 . | 0.1255 | 0.1346 | 0.1356 | -0.0113 | 0.0110  | - |
| 0.0041 | 1   | .   |                           |        |        |        |         |         |   |
| 232    | CA  | CA  | . PHE PHE PHE A A 30 30 . | 0.1001 | 0.1163 | 0.1638 | -0.0186 | 0.0342  | - |
| 0.0115 | 1   | .   |                           |        |        |        |         |         |   |

|        |     |     |                         |                                          |
|--------|-----|-----|-------------------------|------------------------------------------|
| 233    | CB  | CB  | . PHE PHE PHE A A 30 30 | . 0.0900 0.1780 0.1371 -0.0087 0.0330 -  |
| 0.0157 | 1   | .   |                         |                                          |
| 234    | CG  | CG  | . PHE PHE PHE A A 30 30 | . 0.1284 0.1480 0.1315 0.0153 0.0465 -   |
| 0.0139 | 1   | .   |                         |                                          |
| 235    | CD1 | CD1 | . PHE PHE PHE A A 30 30 | . 0.1272 0.1532 0.1852 0.0372 0.0804 -   |
| 0.0498 | 1   | .   |                         |                                          |
| 236    | CE1 | CE1 | . PHE PHE PHE A A 30 30 | . 0.1079 0.2058 0.2027 0.0020 0.0752 -   |
| 0.0241 | 1   | .   |                         |                                          |
| 237    | CZ  | CZ  | . PHE PHE PHE A A 30 30 | . 0.1714 0.2042 0.1535 -0.0200 0.0537 -  |
| 0.0467 | 1   | .   |                         |                                          |
| 238    | CE2 | CE2 | . PHE PHE PHE A A 30 30 | . 0.1637 0.1930 0.1410 0.0217 0.0813 -   |
| 0.0202 | 1   | .   |                         |                                          |
| 239    | CD2 | CD2 | . PHE PHE PHE A A 30 30 | . 0.1503 0.2060 0.1053 -0.0092 0.0429 -  |
| 0.0229 | 1   | .   |                         |                                          |
| 240    | C   | C   | . PHE PHE PHE A A 30 30 | . 0.1130 0.1278 0.1669 0.0025 0.0350 -   |
| 0.0227 | 1   | .   |                         |                                          |
| 241    | O   | O   | . PHE PHE PHE A A 30 30 | . 0.1748 0.1292 0.2606 -0.0294 0.0635 -  |
| 0.0360 | 1   | .   |                         |                                          |
| 242    | N   | N   | . ARG ARG ARG A A 31 31 | . 0.0888 0.1211 0.1272 -0.0127 0.0230 -  |
| 0.0119 | 1   | .   |                         |                                          |
| 243    | CA  | CA  | . ARG ARG ARG A A 31 31 | . 0.0842 0.1105 0.1175 -0.0043 0.0205    |
| 0.0054 | 1   | .   |                         |                                          |
| 244    | CB  | CB  | . ARG ARG ARG A A 31 31 | . 0.1131 0.1057 0.1342 -0.0030 0.0243    |
| 0.0137 | 1   | .   |                         |                                          |
| 245    | CG  | CG  | . ARG ARG ARG A A 31 31 | . 0.1212 0.1539 0.0779 -0.0137 0.0111    |
| 0.0250 | 1   | .   |                         |                                          |
| 246    | CD  | CD  | . ARG ARG ARG A A 31 31 | . 0.1523 0.1228 0.1735 -0.0159 -0.0085   |
| 0.0253 | 1   | .   |                         |                                          |
| 247    | NE  | NE  | . ARG ARG ARG A A 31 31 | . 0.1303 0.1661 0.1253 0.0142 0.0093     |
| 0.0260 | 1   | .   |                         |                                          |
| 248    | CZ  | CZ  | . ARG ARG ARG A A 31 31 | . 0.1964 0.1815 0.1486 0.0120 0.0423     |
| 0.0121 | 1   | .   |                         |                                          |
| 249    | NH1 | NH1 | . ARG ARG ARG A A 31 31 | . 0.2334 0.1763 0.1669 0.0145 0.0377 -   |
| 0.0030 | 1   | .   |                         |                                          |
| 250    | NH2 | NH2 | . ARG ARG ARG A A 31 31 | . 0.2231 0.2799 0.1507 -0.0198 0.0063 -  |
| 0.0263 | 1   | .   |                         |                                          |
| 251    | C   | C   | . ARG ARG ARG A A 31 31 | . 0.0915 0.0899 0.1047 -0.0021 0.0146    |
| 0.0046 | 1   | .   |                         |                                          |
| 252    | O   | O   | . ARG ARG ARG A A 31 31 | . 0.1025 0.1387 0.1291 0.0056 0.0049 -   |
| 0.0036 | 1   | .   |                         |                                          |
| 253    | N   | N   | . ALA ALA ALA A A 32 32 | . 0.0870 0.0916 0.1010 -0.0217 0.0177    |
| 0.0093 | 1   | .   |                         |                                          |
| 254    | CA  | CA  | . ALA ALA ALA A A 32 32 | . 0.0702 0.0950 0.0795 0.0038 -0.0022    |
| 0.0228 | 1   | .   |                         |                                          |
| 255    | CB  | CB  | . ALA ALA ALA A A 32 32 | . 0.1150 0.1252 0.1015 -0.0028 0.0114    |
| 0.0370 | 1   | .   |                         |                                          |
| 256    | C   | C   | . ALA ALA ALA A A 32 32 | . 0.0947 0.0908 0.0763 0.0103 -0.0112    |
| 0.0061 | 1   | .   |                         |                                          |
| 257    | O   | O   | . ALA ALA ALA A A 32 32 | . 0.1099 0.0927 0.1127 -0.0115 0.0081 -  |
| 0.0328 | 1   | .   |                         |                                          |
| 258    | N   | N   | . ALA ALA ALA A A 33 33 | . 0.0908 0.0730 0.1007 0.0100 0.0032     |
| 0.0046 | 1   | .   |                         |                                          |
| 259    | CA  | CA  | . ALA ALA ALA A A 33 33 | . 0.0979 0.0980 0.0952 -0.0064 -0.0008   |
| 0.0140 | 1   | .   |                         |                                          |
| 260    | CB  | CB  | . ALA ALA ALA A A 33 33 | . 0.1307 0.0865 0.0983 -0.0023 0.0014    |
| 0.0155 | 1   | .   |                         |                                          |
| 261    | C   | C   | . ALA ALA ALA A A 33 33 | . 0.0935 0.0934 0.0925 -0.0061 -0.0015 - |
| 0.0018 | 1   | .   |                         |                                          |
| 262    | O   | O   | . ALA ALA ALA A A 33 33 | . 0.0877 0.1150 0.1027 0.0060 -0.0051 -  |
| 0.0115 | 1   | .   |                         |                                          |











|        |     |     |                         |                                        |   |
|--------|-----|-----|-------------------------|----------------------------------------|---|
| 383    | OD1 | OD1 | . ASP ASP ASP A A 50 50 | . 0.1452 0.1119 0.1494 0.0303 0.0145   |   |
| 0.0076 | 1   | .   |                         |                                        |   |
| 384    | OD2 | OD2 | . ASP ASP ASP A A 50 50 | . 0.1452 0.1338 0.1296 0.0082 0.0019   | - |
| 0.0136 | 1   | .   |                         |                                        |   |
| 385    | C   | C   | . ASP ASP ASP A A 50 50 | . 0.1569 0.1436 0.1187 0.0198 0.0282   | - |
| 0.0102 | 1   | .   |                         |                                        |   |
| 386    | O   | O   | . ASP ASP ASP A A 50 50 | . 0.2117 0.1529 0.1777 0.0280 0.0174   |   |
| 0.0114 | 1   | .   |                         |                                        |   |
| 387    | N   | N   | . GLY GLY GLY A A 51 51 | . 0.1488 0.1476 0.1534 0.0185 0.0257   |   |
| 0.0077 | 1   | .   |                         |                                        |   |
| 388    | CA  | CA  | . GLY GLY GLY A A 51 51 | . 0.1768 0.1704 0.1896 0.0495 0.0277   |   |
| 0.0083 | 1   | .   |                         |                                        |   |
| 389    | C   | C   | . GLY GLY GLY A A 51 51 | . 0.2114 0.2329 0.2230 0.0415 0.0374   |   |
| 0.0183 | 1   | .   |                         |                                        |   |
| 390    | O   | O   | . GLY GLY GLY A A 51 51 | . 0.2273 0.2728 0.2336 0.0888 0.0579   |   |
| 0.0284 | 1   | .   |                         |                                        |   |
| 391    | N   | N   | . ASP ASP ASP A A 52 52 | . 0.1954 0.2071 0.1600 0.0340 0.0396   |   |
| 0.0020 | 1   | .   |                         |                                        |   |
| 392    | CA  | CA  | . ASP ASP ASP A A 52 52 | . 0.2545 0.2155 0.1917 0.0294 0.0478   |   |
| 0.0002 | 1   | .   |                         |                                        |   |
| 393    | CB  | CB  | . ASP ASP ASP A A 52 52 | . 0.2811 0.1885 0.1810 0.0226 0.0412   | - |
| 0.0138 | 1   | .   |                         |                                        |   |
| 394    | CG  | CG  | . ASP ASP ASP A A 52 52 | . 0.2905 0.1876 0.2110 0.0095 0.0293   |   |
| 0.0003 | 1   | .   |                         |                                        |   |
| 395    | OD1 | OD1 | . ASP ASP ASP A A 52 52 | . 0.3131 0.2691 0.2291 0.0606 0.0380   | - |
| 0.0413 | 1   | .   |                         |                                        |   |
| 396    | OD2 | OD2 | . ASP ASP ASP A A 52 52 | . 0.2957 0.2417 0.2554 0.1015 0.0722   |   |
| 0.0269 | 1   | .   |                         |                                        |   |
| 397    | C   | C   | . ASP ASP ASP A A 52 52 | . 0.2525 0.2300 0.2097 0.0429 0.0658   |   |
| 0.0076 | 1   | .   |                         |                                        |   |
| 398    | O   | O   | . ASP ASP ASP A A 52 52 | . 0.2446 0.2262 0.1664 0.0664 0.0725   |   |
| 0.0289 | 1   | .   |                         |                                        |   |
| 399    | N   | N   | . LYS LYS LYS A A 53 53 | . 0.2703 0.2795 0.2881 0.0477 0.0731   |   |
| 0.0157 | 1   | .   |                         |                                        |   |
| 400    | CA  | CA  | . LYS LYS LYS A A 53 53 | . 0.3125 0.3422 0.3344 0.0422 0.0674   |   |
| 0.0058 | 1   | .   |                         |                                        |   |
| 401    | CB  | CB  | . LYS LYS LYS A A 53 53 | . 0.3130 0.3591 0.3541 0.0565 0.0527   |   |
| 0.0215 | 1   | .   |                         |                                        |   |
| 402    | CG  | CG  | . LYS LYS LYS A A 53 53 | . 0.3870 0.4647 0.3647 0.0380 0.0295   |   |
| 0.0220 | 1   | .   |                         |                                        |   |
| 403    | CD  | CD  | . LYS LYS LYS A A 53 53 | . 0.5047 0.4742 0.4519 0.0001 0.0154   | - |
| 0.0165 | 1   | .   |                         |                                        |   |
| 404    | CE  | CE  | . LYS LYS LYS A A 53 53 | . 0.5361 0.5389 0.4943 0.0137 0.0086   | - |
| 0.0532 | 1   | .   |                         |                                        |   |
| 405    | NZ  | NZ  | . LYS LYS LYS A A 53 53 | . 0.5815 0.5957 0.5792 -0.0369 -0.0327 | - |
| 0.0314 | 1   | .   |                         |                                        |   |
| 406    | C   | C   | . LYS LYS LYS A A 53 53 | . 0.3039 0.3184 0.3280 0.0497 0.0646   |   |
| 0.0013 | 1   | .   |                         |                                        |   |
| 407    | O   | O   | . LYS LYS LYS A A 53 53 | . 0.3192 0.3731 0.3832 0.0391 0.1117   |   |
| 0.0275 | 1   | .   |                         |                                        |   |
| 408    | N   | N   | . GLN GLN GLN A A 54 54 | . 0.3353 0.3547 0.3440 0.0452 0.0544   |   |
| 0.0144 | 1   | .   |                         |                                        |   |
| 409    | CA  | CA  | . GLN GLN GLN A A 54 54 | . 0.3895 0.3649 0.3446 0.0346 0.0279   |   |
| 0.0126 | 1   | .   |                         |                                        |   |
| 410    | CB  | CB  | . GLN GLN GLN A A 54 54 | . 0.4126 0.3917 0.3793 0.0161 0.0141   |   |
| 0.0062 | 1   | .   |                         |                                        |   |
| 411    | CG  | CG  | . GLN GLN GLN A A 54 54 | . 0.4477 0.4609 0.4537 0.0251 0.0303   |   |
| 0.0096 | 1   | .   |                         |                                        |   |
| 412    | CD  | CD  | . GLN GLN GLN A A 54 54 | . 0.4850 0.5016 0.5323 0.0214 0.0359   |   |
| 0.0416 | 1   | .   |                         |                                        |   |



|        |     |     |                         |                                          |
|--------|-----|-----|-------------------------|------------------------------------------|
| 443    | CG  | CG  | . LEU LEU LEU A A 57 57 | . 0.4210 0.4362 0.3677 -0.0337 0.0291    |
| 0.0342 | 1   | .   |                         |                                          |
| 444    | CD1 | CD1 | . LEU LEU LEU A A 57 57 | . 0.4938 0.4439 0.4235 -0.0325 -0.0019   |
| 0.0132 | 1   | .   |                         |                                          |
| 445    | CD2 | CD2 | . LEU LEU LEU A A 57 57 | . 0.4554 0.5686 0.4296 0.0016 0.0297 -   |
| 0.0036 | 1   | .   |                         |                                          |
| 446    | C   | C   | . LEU LEU LEU A A 57 57 | . 0.2168 0.2526 0.2255 0.0089 0.0217     |
| 0.0104 | 1   | .   |                         |                                          |
| 447    | O   | O   | . LEU LEU LEU A A 57 57 | . 0.1834 0.2945 0.2578 -0.0087 0.0353    |
| 0.0120 | 1   | .   |                         |                                          |
| 448    | N   | N   | . GLY GLY GLY A A 58 58 | . 0.1892 0.2110 0.2011 0.0174 0.0447     |
| 0.0165 | 1   | .   |                         |                                          |
| 449    | CA  | CA  | . GLY GLY GLY A A 58 58 | . 0.1671 0.1750 0.1678 0.0375 0.0420     |
| 0.0248 | 1   | .   |                         |                                          |
| 450    | C   | C   | . GLY GLY GLY A A 58 58 | . 0.1707 0.1605 0.1626 0.0266 0.0418     |
| 0.0161 | 1   | .   |                         |                                          |
| 451    | O   | O   | . GLY GLY GLY A A 58 58 | . 0.1553 0.1724 0.1490 0.0360 0.0285     |
| 0.0175 | 1   | .   |                         |                                          |
| 452    | N   | N   | . LYS LYS LYS A A 59 59 | . 0.1212 0.1490 0.1439 0.0144 0.0335     |
| 0.0008 | 1   | .   |                         |                                          |
| 453    | CA  | CA  | . LYS LYS LYS A A 59 59 | . 0.1388 0.1216 0.1410 0.0004 0.0229 -   |
| 0.0118 | 1   | .   |                         |                                          |
| 454    | CB  | CB  | . LYS LYS LYS A A 59 59 | . 0.1399 0.1380 0.2113 0.0046 0.0165 -   |
| 0.0180 | 1   | .   |                         |                                          |
| 455    | CG  | CG  | . LYS LYS LYS A A 59 59 | . 0.1428 0.2390 0.2718 -0.0133 0.0171 -  |
| 0.0295 | 1   | .   |                         |                                          |
| 456    | CD  | CD  | . LYS LYS LYS A A 59 59 | . 0.3996 0.4415 0.4071 0.0122 -0.0069 -  |
| 0.0577 | 1   | .   |                         |                                          |
| 457    | CE  | CE  | . LYS LYS LYS A A 59 59 | . 0.4860 0.4095 0.5660 0.0533 0.0213 -   |
| 0.0616 | 1   | .   |                         |                                          |
| 458    | NZ  | NZ  | . LYS LYS LYS A A 59 59 | . 0.4160 0.3673 0.5453 0.0925 -0.0008 -  |
| 0.0383 | 1   | .   |                         |                                          |
| 459    | C   | C   | . LYS LYS LYS A A 59 59 | . 0.1138 0.0987 0.1234 -0.0017 0.0049 -  |
| 0.0131 | 1   | .   |                         |                                          |
| 460    | O   | O   | . LYS LYS LYS A A 59 59 | . 0.1336 0.1171 0.1231 0.0057 0.0049 -   |
| 0.0063 | 1   | .   |                         |                                          |
| 461    | N   | N   | . GLY GLY GLY A A 60 60 | . 0.1128 0.1053 0.1153 0.0047 -0.0011    |
| 0.0017 | 1   | .   |                         |                                          |
| 462    | CA  | CA  | . GLY GLY GLY A A 60 60 | . 0.1110 0.1168 0.1291 -0.0030 0.0171    |
| 0.0182 | 1   | .   |                         |                                          |
| 463    | C   | C   | . GLY GLY GLY A A 60 60 | . 0.1115 0.1132 0.0980 0.0226 -0.0007 -  |
| 0.0036 | 1   | .   |                         |                                          |
| 464    | O   | O   | . GLY GLY GLY A A 60 60 | . 0.1343 0.1303 0.0915 0.0148 0.0055 -   |
| 0.0136 | 1   | .   |                         |                                          |
| 465    | N   | N   | . VAL VAL VAL A A 61 61 | . 0.0856 0.0718 0.0893 0.0088 0.0162     |
| 0.0026 | 1   | .   |                         |                                          |
| 466    | CA  | CA  | . VAL VAL VAL A A 61 61 | . 0.0968 0.0920 0.1114 0.0021 0.0216     |
| 0.0035 | 1   | .   |                         |                                          |
| 467    | CB  | CB  | . VAL VAL VAL A A 61 61 | . 0.1075 0.0623 0.0784 -0.0003 -0.0185 - |
| 0.0058 | 1   | .   |                         |                                          |
| 468    | CG1 | CG1 | . VAL VAL VAL A A 61 61 | . 0.1027 0.0896 0.0706 -0.0003 0.0000    |
| 0.0008 | 1   | .   |                         |                                          |
| 469    | CG2 | CG2 | . VAL VAL VAL A A 61 61 | . 0.0887 0.1027 0.1188 -0.0026 -0.0080 - |
| 0.0071 | 1   | .   |                         |                                          |
| 470    | C   | C   | . VAL VAL VAL A A 61 61 | . 0.1134 0.0807 0.1061 0.0121 0.0118 -   |
| 0.0078 | 1   | .   |                         |                                          |
| 471    | O   | O   | . VAL VAL VAL A A 61 61 | . 0.1318 0.0982 0.1128 -0.0017 0.0145    |
| 0.0000 | 1   | .   |                         |                                          |
| 472    | N   | N   | . LEU LEU LEU A A 62 62 | . 0.1461 0.0933 0.0930 -0.0021 0.0069 -  |
| 0.0070 | 1   | .   |                         |                                          |





|        |     |     |                         |                                          |
|--------|-----|-----|-------------------------|------------------------------------------|
| 503    | CB  | CB  | . ASP ASP ASP A A 66 66 | . 0.1488 0.1276 0.1145 -0.0019 0.0321    |
| 0.0065 | 1   | .   |                         |                                          |
| 504    | CG  | CG  | . ASP ASP ASP A A 66 66 | . 0.3594 0.2524 0.2993 0.0047 0.0351     |
| 0.0161 | 1   | .   |                         |                                          |
| 505    | OD1 | OD1 | . ASP ASP ASP A A 66 66 | . 0.4339 0.4256 0.4734 -0.0029 0.0265    |
| 0.0154 | 1   | .   |                         |                                          |
| 506    | OD2 | OD2 | . ASP ASP ASP A A 66 66 | . 0.4646 0.4373 0.4919 0.1241 0.0363     |
| 0.0672 | 1   | .   |                         |                                          |
| 507    | C   | C   | . ASP ASP ASP A A 66 66 | . 0.1456 0.1049 0.1189 0.0045 0.0035     |
| 0.0068 | 1   | .   |                         |                                          |
| 508    | O   | O   | . ASP ASP ASP A A 66 66 | . 0.1278 0.1010 0.1305 0.0136 0.0041     |
| 0.0042 | 1   | .   |                         |                                          |
| 509    | N   | N   | . HIS HIS HIS A A 67 67 | . 0.1026 0.1020 0.1034 -0.0005 0.0143    |
| 0.0057 | 1   | .   |                         |                                          |
| 510    | CA  | CA  | . HIS HIS HIS A A 67 67 | . 0.1040 0.0850 0.1022 -0.0002 0.0133    |
| 0.0143 | 1   | .   |                         |                                          |
| 511    | CB  | CB  | . HIS HIS HIS A A 67 67 | . 0.1129 0.1234 0.1044 0.0189 0.0184 -   |
| 0.0052 | 1   | .   |                         |                                          |
| 512    | CG  | CG  | . HIS HIS HIS A A 67 67 | . 0.0956 0.0934 0.1403 -0.0093 -0.0014 - |
| 0.0267 | 1   | .   |                         |                                          |
| 513    | ND1 | ND1 | . HIS HIS HIS A A 67 67 | . 0.1629 0.1201 0.1675 0.0029 0.0098 -   |
| 0.0026 | 1   | .   |                         |                                          |
| 514    | CE1 | CE1 | . HIS HIS HIS A A 67 67 | . 0.1195 0.1392 0.1589 0.0227 0.0045     |
| 0.0006 | 1   | .   |                         |                                          |
| 515    | NE2 | NE2 | . HIS HIS HIS A A 67 67 | . 0.1869 0.1132 0.1975 0.0098 0.0276     |
| 0.0233 | 1   | .   |                         |                                          |
| 516    | CD2 | CD2 | . HIS HIS HIS A A 67 67 | . 0.0962 0.1104 0.1168 0.0117 0.0030     |
| 0.0418 | 1   | .   |                         |                                          |
| 517    | C   | C   | . HIS HIS HIS A A 67 67 | . 0.1336 0.0977 0.0965 0.0081 0.0230 -   |
| 0.0048 | 1   | .   |                         |                                          |
| 518    | O   | O   | . HIS HIS HIS A A 67 67 | . 0.1253 0.0865 0.1146 -0.0032 0.0011    |
| 0.0001 | 1   | .   |                         |                                          |
| 519    | N   | N   | . ILE ILE ILE A A 68 68 | . 0.1055 0.0804 0.1007 0.0175 0.0096     |
| 0.0040 | 1   | .   |                         |                                          |
| 520    | CA  | CA  | . ILE ILE ILE A A 68 68 | . 0.1022 0.0870 0.1137 -0.0040 0.0049    |
| 0.0014 | 1   | .   |                         |                                          |
| 521    | CB  | CB  | . ILE ILE ILE A A 68 68 | . 0.0915 0.0611 0.0778 -0.0024 0.0022    |
| 0.0106 | 1   | .   |                         |                                          |
| 522    | CG1 | CG1 | . ILE ILE ILE A A 68 68 | . 0.1287 0.0934 0.0890 -0.0183 -0.0009   |
| 0.0374 | 1   | .   |                         |                                          |
| 523    | CD  | CD  | . ILE ILE ILE A A 68 68 | . 0.1268 0.0670 0.0901 0.0071 -0.0059    |
| 0.0383 | 1   | .   |                         |                                          |
| 524    | CG2 | CG2 | . ILE ILE ILE A A 68 68 | . 0.0756 0.0742 0.1013 0.0304 0.0069     |
| 0.0085 | 1   | .   |                         |                                          |
| 525    | C   | C   | . ILE ILE ILE A A 68 68 | . 0.0968 0.0902 0.0895 -0.0005 0.0130 -  |
| 0.0083 | 1   | .   |                         |                                          |
| 526    | O   | O   | . ILE ILE ILE A A 68 68 | . 0.1199 0.1050 0.1216 0.0022 -0.0090    |
| 0.0227 | 1   | .   |                         |                                          |
| 527    | N   | N   | . ASN ASN ASN A A 69 69 | . 0.1044 0.0763 0.1112 0.0054 -0.0058 -  |
| 0.0100 | 1   | .   |                         |                                          |
| 528    | CA  | CA  | . ASN ASN ASN A A 69 69 | . 0.1133 0.0809 0.1023 -0.0065 -0.0069 - |
| 0.0040 | 1   | .   |                         |                                          |
| 529    | CB  | CB  | . ASN ASN ASN A A 69 69 | . 0.1429 0.0799 0.0925 -0.0007 -0.0052   |
| 0.0078 | 1   | .   |                         |                                          |
| 530    | CG  | CG  | . ASN ASN ASN A A 69 69 | . 0.0962 0.0979 0.1243 -0.0038 0.0126 -  |
| 0.0176 | 1   | .   |                         |                                          |
| 531    | OD1 | OD1 | . ASN ASN ASN A A 69 69 | . 0.1380 0.0972 0.1235 -0.0227 0.0238 -  |
| 0.0099 | 1   | .   |                         |                                          |
| 532    | ND2 | ND2 | . ASN ASN ASN A A 69 69 | . 0.1438 0.1198 0.0958 0.0000 -0.0088 -  |
| 0.0026 | 1   | .   |                         |                                          |

|        |     |     |                           |        |        |        |         |         |   |
|--------|-----|-----|---------------------------|--------|--------|--------|---------|---------|---|
| 533    | C   | C   | . ASN ASN ASN A A 69 69 . | 0.1179 | 0.0969 | 0.1309 | -0.0051 | -0.0066 | - |
| 0.0080 | 1   | .   |                           |        |        |        |         |         |   |
| 534    | O   | O   | . ASN ASN ASN A A 69 69 . | 0.1404 | 0.0888 | 0.1491 | -0.0130 | -0.0112 |   |
| 0.0039 | 1   | .   |                           |        |        |        |         |         |   |
| 535    | N   | N   | . SER SER SER A A 70 70 . | 0.1421 | 0.0785 | 0.1255 | 0.0019  | -0.0027 | - |
| 0.0044 | 1   | .   |                           |        |        |        |         |         |   |
| 536    | CA  | CA  | . SER SER SER A A 70 70 . | 0.1596 | 0.0801 | 0.1455 | 0.0164  | -0.0042 | - |
| 0.0029 | 1   | .   |                           |        |        |        |         |         |   |
| 537    | CB  | CB  | . SER SER SER A A 70 70 . | 0.1842 | 0.1014 | 0.0794 | -0.0060 | 0.0357  |   |
| 0.0200 | 1   | .   |                           |        |        |        |         |         |   |
| 538    | OG  | OG  | . SER SER SER A A 70 70 . | 0.3701 | 0.2483 | 0.2088 | 0.0145  | 0.0130  | - |
| 0.0031 | 1   | .   |                           |        |        |        |         |         |   |
| 539    | C   | C   | . SER SER SER A A 70 70 . | 0.1194 | 0.1072 | 0.0975 | 0.0054  | -0.0192 | - |
| 0.0008 | 1   | .   |                           |        |        |        |         |         |   |
| 540    | O   | O   | . SER SER SER A A 70 70 . | 0.1342 | 0.1012 | 0.1208 | 0.0054  | -0.0137 | - |
| 0.0068 | 1   | .   |                           |        |        |        |         |         |   |
| 541    | N   | N   | . THR THR THR A A 71 71 . | 0.1268 | 0.0865 | 0.1117 | 0.0046  | -0.0029 | - |
| 0.0129 | 1   | .   |                           |        |        |        |         |         |   |
| 542    | CA  | CA  | . THR THR THR A A 71 71 . | 0.1034 | 0.0915 | 0.0937 | 0.0197  | -0.0002 |   |
| 0.0044 | 1   | .   |                           |        |        |        |         |         |   |
| 543    | CB  | CB  | . THR THR THR A A 71 71 . | 0.0994 | 0.0857 | 0.0691 | 0.0369  | -0.0090 | - |
| 0.0168 | 1   | .   |                           |        |        |        |         |         |   |
| 544    | OG1 | OG1 | . THR THR THR A A 71 71 . | 0.1233 | 0.0908 | 0.0992 | 0.0074  | 0.0082  | - |
| 0.0071 | 1   | .   |                           |        |        |        |         |         |   |
| 545    | CG2 | CG2 | . THR THR THR A A 71 71 . | 0.1408 | 0.0818 | 0.1265 | 0.0164  | 0.0073  |   |
| 0.0181 | 1   | .   |                           |        |        |        |         |         |   |
| 546    | C   | C   | . THR THR THR A A 71 71 . | 0.1176 | 0.0976 | 0.0929 | -0.0102 | -0.0021 | - |
| 0.0173 | 1   | .   |                           |        |        |        |         |         |   |
| 547    | O   | O   | . THR THR THR A A 71 71 . | 0.1348 | 0.0812 | 0.1086 | -0.0038 | 0.0172  |   |
| 0.0007 | 1   | .   |                           |        |        |        |         |         |   |
| 548    | N   | N   | . ILE ILE ILE A A 72 72 . | 0.1088 | 0.0724 | 0.0864 | -0.0061 | 0.0104  | - |
| 0.0035 | 1   | .   |                           |        |        |        |         |         |   |
| 549    | CA  | CA  | . ILE ILE ILE A A 72 72 . | 0.0885 | 0.0935 | 0.0913 | -0.0122 | 0.0017  | - |
| 0.0079 | 1   | .   |                           |        |        |        |         |         |   |
| 550    | CB  | CB  | . ILE ILE ILE A A 72 72 . | 0.1055 | 0.0736 | 0.0992 | -0.0088 | 0.0086  | - |
| 0.0093 | 1   | .   |                           |        |        |        |         |         |   |
| 551    | CG1 | CG1 | . ILE ILE ILE A A 72 72 . | 0.1107 | 0.0824 | 0.1222 | -0.0302 | -0.0030 |   |
| 0.0081 | 1   | .   |                           |        |        |        |         |         |   |
| 552    | CD  | CD  | . ILE ILE ILE A A 72 72 . | 0.0972 | 0.1165 | 0.1469 | -0.0421 | -0.0386 |   |
| 0.0059 | 1   | .   |                           |        |        |        |         |         |   |
| 553    | CG2 | CG2 | . ILE ILE ILE A A 72 72 . | 0.1403 | 0.1254 | 0.1198 | -0.0246 | 0.0199  | - |
| 0.0330 | 1   | .   |                           |        |        |        |         |         |   |
| 554    | C   | C   | . ILE ILE ILE A A 72 72 . | 0.1024 | 0.0909 | 0.1053 | 0.0008  | 0.0024  |   |
| 0.0060 | 1   | .   |                           |        |        |        |         |         |   |
| 555    | O   | O   | . ILE ILE ILE A A 72 72 . | 0.1357 | 0.1060 | 0.0940 | -0.0180 | 0.0222  | - |
| 0.0110 | 1   | .   |                           |        |        |        |         |         |   |
| 556    | N   | N   | . ALA ALA ALA A A 73 73 . | 0.1076 | 0.0815 | 0.0995 | -0.0043 | -0.0093 |   |
| 0.0044 | 1   | .   |                           |        |        |        |         |         |   |
| 557    | CA  | CA  | . ALA ALA ALA A A 73 73 . | 0.1158 | 0.0969 | 0.1211 | -0.0089 | 0.0095  |   |
| 0.0094 | 1   | .   |                           |        |        |        |         |         |   |
| 558    | CB  | CB  | . ALA ALA ALA A A 73 73 . | 0.1437 | 0.1001 | 0.1551 | -0.0119 | -0.0136 | - |
| 0.0090 | 1   | .   |                           |        |        |        |         |         |   |
| 559    | C   | C   | . ALA ALA ALA A A 73 73 . | 0.1146 | 0.1015 | 0.1132 | -0.0052 | 0.0005  | - |
| 0.0095 | 1   | .   |                           |        |        |        |         |         |   |
| 560    | O   | O   | . ALA ALA ALA A A 73 73 . | 0.1384 | 0.0879 | 0.1371 | -0.0079 | 0.0155  | - |
| 0.0022 | 1   | .   |                           |        |        |        |         |         |   |
| 561    | N   | N   | . PRO PRO PRO A A 74 74 . | 0.1137 | 0.0923 | 0.0922 | 0.0001  | 0.0043  |   |
| 0.0008 | 1   | .   |                           |        |        |        |         |         |   |
| 562    | CA  | CA  | . PRO PRO PRO A A 74 74 . | 0.1181 | 0.0895 | 0.0880 | -0.0109 | -0.0006 | - |
| 0.0090 | 1   | .   |                           |        |        |        |         |         |   |



|        |     |     |                           |        |        |        |         |         |   |
|--------|-----|-----|---------------------------|--------|--------|--------|---------|---------|---|
| 593    | C   | C   | . SER SER SER A A 78 78 . | 0.1473 | 0.1440 | 0.1400 | -0.0185 | 0.0187  | - |
| 0.0163 | 1   | .   |                           |        |        |        |         |         |   |
| 594    | O   | O   | . SER SER SER A A 78 78 . | 0.1668 | 0.1454 | 0.1627 | -0.0352 | 0.0267  | - |
| 0.0199 | 1   | .   |                           |        |        |        |         |         |   |
| 595    | N   | N   | . SER SER SER A A 79 79 . | 0.1315 | 0.0852 | 0.1018 | -0.0059 | 0.0094  | - |
| 0.0113 | 1   | .   |                           |        |        |        |         |         |   |
| 596    | CA  | CA  | . SER SER SER A A 79 79 . | 0.1451 | 0.1291 | 0.1089 | -0.0077 | 0.0093  | - |
| 0.0045 | 1   | .   |                           |        |        |        |         |         |   |
| 597    | CB  | CB  | . SER SER SER A A 79 79 . | 0.1382 | 0.0941 | 0.1507 | -0.0085 | -0.0048 | - |
| 0.0118 | 1   | .   |                           |        |        |        |         |         |   |
| 598    | OG  | OG  | . SER SER SER A A 79 79 . | 0.1366 | 0.1131 | 0.1308 | -0.0049 | 0.0191  | - |
| 0.0080 | 1   | .   |                           |        |        |        |         |         |   |
| 599    | C   | C   | . SER SER SER A A 79 79 . | 0.1507 | 0.1164 | 0.1387 | -0.0141 | 0.0103  | - |
| 0.0079 | 1   | .   |                           |        |        |        |         |         |   |
| 600    | O   | O   | . SER SER SER A A 79 79 . | 0.1640 | 0.1558 | 0.1458 | -0.0310 | 0.0244  | - |
| 0.0069 | 1   | .   |                           |        |        |        |         |         |   |
| 601    | N   | N   | . GLY GLY GLY A A 80 80 . | 0.1228 | 0.1267 | 0.1510 | -0.0101 | 0.0090  | - |
| 0.0073 | 1   | .   |                           |        |        |        |         |         |   |
| 602    | CA  | CA  | . GLY GLY GLY A A 80 80 . | 0.1323 | 0.1486 | 0.1618 | -0.0043 | 0.0276  | - |
| 0.0245 | 1   | .   |                           |        |        |        |         |         |   |
| 603    | C   | C   | . GLY GLY GLY A A 80 80 . | 0.1513 | 0.1523 | 0.1818 | -0.0070 | 0.0180  | - |
| 0.0078 | 1   | .   |                           |        |        |        |         |         |   |
| 604    | O   | O   | . GLY GLY GLY A A 80 80 . | 0.1522 | 0.1845 | 0.2242 | 0.0026  | 0.0239  | - |
| 0.0457 | 1   | .   |                           |        |        |        |         |         |   |
| 605    | N   | N   | . LEU LEU LEU A A 81 81 . | 0.1700 | 0.1571 | 0.1567 | -0.0057 | 0.0156  | - |
| 0.0171 | 1   | .   |                           |        |        |        |         |         |   |
| 606    | CA  | CA  | . LEU LEU LEU A A 81 81 . | 0.1689 | 0.1469 | 0.1611 | -0.0115 | 0.0158  | - |
| 0.0217 | 1   | .   |                           |        |        |        |         |         |   |
| 607    | CB  | CB  | . LEU LEU LEU A A 81 81 . | 0.1730 | 0.1587 | 0.1542 | -0.0065 | 0.0081  | - |
| 0.0259 | 1   | .   |                           |        |        |        |         |         |   |
| 608    | CG  | CG  | . LEU LEU LEU A A 81 81 . | 0.2194 | 0.1232 | 0.1291 | -0.0234 | 0.0248  | - |
| 0.0072 | 1   | .   |                           |        |        |        |         |         |   |
| 609    | CD1 | CD1 | . LEU LEU LEU A A 81 81 . | 0.2351 | 0.1478 | 0.1631 | -0.0049 | -0.0193 | - |
| 0.0035 | 1   | .   |                           |        |        |        |         |         |   |
| 610    | CD2 | CD2 | . LEU LEU LEU A A 81 81 . | 0.3248 | 0.1870 | 0.1811 | 0.0082  | 0.0605  | - |
| 0.0153 | 1   | .   |                           |        |        |        |         |         |   |
| 611    | C   | C   | . LEU LEU LEU A A 81 81 . | 0.1706 | 0.1664 | 0.1578 | -0.0053 | 0.0355  | - |
| 0.0071 | 1   | .   |                           |        |        |        |         |         |   |
| 612    | O   | O   | . LEU LEU LEU A A 81 81 . | 0.1859 | 0.1576 | 0.1476 | -0.0149 | 0.0074  | - |
| 0.0032 | 1   | .   |                           |        |        |        |         |         |   |
| 613    | N   | N   | . SER SER SER A A 82 82 . | 0.1581 | 0.1153 | 0.1765 | -0.0062 | 0.0225  | - |
| 0.0192 | 1   | .   |                           |        |        |        |         |         |   |
| 614    | CA  | CA  | . SER SER SER A A 82 82 . | 0.1404 | 0.1267 | 0.1892 | -0.0084 | 0.0416  | - |
| 0.0142 | 1   | .   |                           |        |        |        |         |         |   |
| 615    | CB  | CB  | . SER SER SER A A 82 82 . | 0.1689 | 0.1334 | 0.2111 | 0.0082  | 0.0841  | - |
| 0.0136 | 1   | .   |                           |        |        |        |         |         |   |
| 616    | OG  | OG  | . SER SER SER A A 82 82 . | 0.1862 | 0.1434 | 0.2353 | -0.0126 | 0.0664  | - |
| 0.0182 | 1   | .   |                           |        |        |        |         |         |   |
| 617    | C   | C   | . SER SER SER A A 82 82 . | 0.1165 | 0.1431 | 0.1437 | -0.0003 | 0.0236  | - |
| 0.0075 | 1   | .   |                           |        |        |        |         |         |   |
| 618    | O   | O   | . SER SER SER A A 82 82 . | 0.1618 | 0.1206 | 0.1442 | -0.0041 | 0.0287  | - |
| 0.0178 | 1   | .   |                           |        |        |        |         |         |   |
| 619    | N   | N   | . VAL VAL VAL A A 83 83 . | 0.1514 | 0.1360 | 0.1439 | -0.0023 | 0.0259  | - |
| 0.0052 | 1   | .   |                           |        |        |        |         |         |   |
| 620    | CA  | CA  | . VAL VAL VAL A A 83 83 . | 0.1433 | 0.1595 | 0.1524 | -0.0049 | 0.0166  | - |
| 0.0075 | 1   | .   |                           |        |        |        |         |         |   |
| 621    | CB  | CB  | . VAL VAL VAL A A 83 83 . | 0.1127 | 0.1431 | 0.1190 | 0.0175  | 0.0040  | - |
| 0.0060 | 1   | .   |                           |        |        |        |         |         |   |
| 622    | CG1 | CG1 | . VAL VAL VAL A A 83 83 . | 0.1643 | 0.1917 | 0.1435 | -0.0063 | 0.0468  | - |
| 0.0254 | 1   | .   |                           |        |        |        |         |         |   |





|        |     |     |                         |                                        |   |
|--------|-----|-----|-------------------------|----------------------------------------|---|
| 683    | C   | C   | . ASP ASP ASP A A 90 90 | . 0.1490 0.1293 0.1350 -0.0009 0.0185  |   |
| 0.0105 | 1   | .   |                         |                                        |   |
| 684    | O   | O   | . ASP ASP ASP A A 90 90 | . 0.1290 0.1177 0.1458 0.0016 0.0098   | - |
| 0.0008 | 1   | .   |                         |                                        |   |
| 685    | N   | N   | . ASN ASN ASN A A 91 91 | . 0.1601 0.1185 0.1388 -0.0161 0.0039  |   |
| 0.0099 | 1   | .   |                         |                                        |   |
| 686    | CA  | CA  | . ASN ASN ASN A A 91 91 | . 0.1883 0.1369 0.1305 -0.0040 0.0100  |   |
| 0.0093 | 1   | .   |                         |                                        |   |
| 687    | CB  | CB  | . ASN ASN ASN A A 91 91 | . 0.2020 0.1405 0.1260 -0.0064 0.0026  |   |
| 0.0334 | 1   | .   |                         |                                        |   |
| 688    | CG  | CG  | . ASN ASN ASN A A 91 91 | . 0.2225 0.2572 0.2194 0.0043 -0.0208  |   |
| 0.0026 | 1   | .   |                         |                                        |   |
| 689    | OD1 | OD1 | . ASN ASN ASN A A 91 91 | . 0.3820 0.3401 0.2349 -0.0938 0.0220  | - |
| 0.0002 | 1   | .   |                         |                                        |   |
| 690    | ND2 | ND2 | . ASN ASN ASN A A 91 91 | . 0.2847 0.4099 0.2906 0.0432 0.0094   |   |
| 0.0310 | 1   | .   |                         |                                        |   |
| 691    | C   | C   | . ASN ASN ASN A A 91 91 | . 0.1604 0.1191 0.1348 -0.0084 -0.0019 |   |
| 0.0164 | 1   | .   |                         |                                        |   |
| 692    | O   | O   | . ASN ASN ASN A A 91 91 | . 0.1698 0.1347 0.1398 -0.0168 0.0168  |   |
| 0.0138 | 1   | .   |                         |                                        |   |
| 693    | N   | N   | . LEU LEU LEU A A 92 92 | . 0.1560 0.1008 0.1359 -0.0375 0.0096  |   |
| 0.0143 | 1   | .   |                         |                                        |   |
| 694    | CA  | CA  | . LEU LEU LEU A A 92 92 | . 0.1576 0.1437 0.1437 -0.0061 -0.0022 |   |
| 0.0066 | 1   | .   |                         |                                        |   |
| 695    | CB  | CB  | . LEU LEU LEU A A 92 92 | . 0.1532 0.1843 0.2021 0.0115 0.0001   |   |
| 0.0054 | 1   | .   |                         |                                        |   |
| 696    | CG  | CG  | . LEU LEU LEU A A 92 92 | . 0.2460 0.2081 0.2439 0.0158 -0.0387  |   |
| 0.0215 | 1   | .   |                         |                                        |   |
| 697    | CD1 | CD1 | . LEU LEU LEU A A 92 92 | . 0.3380 0.2405 0.3773 -0.0034 -0.0234 |   |
| 0.0913 | 1   | .   |                         |                                        |   |
| 698    | CD2 | CD2 | . LEU LEU LEU A A 92 92 | . 0.2124 0.2364 0.3132 -0.0103 -0.0960 |   |
| 0.0568 | 1   | .   |                         |                                        |   |
| 699    | C   | C   | . LEU LEU LEU A A 92 92 | . 0.1510 0.1212 0.1533 -0.0073 -0.0003 |   |
| 0.0131 | 1   | .   |                         |                                        |   |
| 700    | O   | O   | . LEU LEU LEU A A 92 92 | . 0.1423 0.1221 0.1496 -0.0070 -0.0057 | - |
| 0.0009 | 1   | .   |                         |                                        |   |
| 701    | N   | N   | . MET MET MET A A 93 93 | . 0.1215 0.0986 0.1165 -0.0263 -0.0069 | - |
| 0.0029 | 1   | .   |                         |                                        |   |
| 702    | CA  | CA  | . MET MET MET A A 93 93 | . 0.1273 0.1004 0.1250 -0.0033 0.0114  |   |
| 0.0088 | 1   | .   |                         |                                        |   |
| 703    | CB  | CB  | . MET MET MET A A 93 93 | . 0.1107 0.0947 0.1427 0.0265 0.0202   |   |
| 0.0084 | 1   | .   |                         |                                        |   |
| 704    | CG  | CG  | . MET MET MET A A 93 93 | . 0.1378 0.0909 0.1265 -0.0143 -0.0106 |   |
| 0.0323 | 1   | .   |                         |                                        |   |
| 705    | SD  | SD  | . MET MET MET A A 93 93 | . 0.1484 0.1093 0.1160 0.0078 0.0027   |   |
| 0.0059 | 1   | .   |                         |                                        |   |
| 706    | CE  | CE  | . MET MET MET A A 93 93 | . 0.1684 0.1493 0.0913 -0.0005 -0.0110 | - |
| 0.0095 | 1   | .   |                         |                                        |   |
| 707    | C   | C   | . MET MET MET A A 93 93 | . 0.1235 0.1025 0.1350 -0.0072 0.0139  |   |
| 0.0114 | 1   | .   |                         |                                        |   |
| 708    | O   | O   | . MET MET MET A A 93 93 | . 0.1288 0.0856 0.1121 -0.0031 0.0149  | - |
| 0.0027 | 1   | .   |                         |                                        |   |
| 709    | N   | N   | . LEU LEU LEU A A 94 94 | . 0.1202 0.1189 0.1299 -0.0098 0.0029  |   |
| 0.0149 | 1   | .   |                         |                                        |   |
| 710    | CA  | CA  | . LEU LEU LEU A A 94 94 | . 0.1248 0.0845 0.1322 -0.0111 -0.0150 | - |
| 0.0125 | 1   | .   |                         |                                        |   |
| 711    | CB  | CB  | . LEU LEU LEU A A 94 94 | . 0.1439 0.1258 0.1311 -0.0265 -0.0134 | - |
| 0.0047 | 1   | .   |                         |                                        |   |
| 712    | CG  | CG  | . LEU LEU LEU A A 94 94 | . 0.2263 0.1618 0.1664 -0.0346 -0.0033 | - |
| 0.0323 | 1   | .   |                         |                                        |   |

|        |     |     |                         |                                          |
|--------|-----|-----|-------------------------|------------------------------------------|
| 713    | CD1 | CD1 | . LEU LEU LEU A A 94 94 | . 0.3501 0.2383 0.1588 -0.0621 0.0197 -  |
| 0.0294 | 1   | .   |                         |                                          |
| 714    | CD2 | CD2 | . LEU LEU LEU A A 94 94 | . 0.3059 0.1553 0.2674 -0.0633 0.0690 -  |
| 0.0350 | 1   | .   |                         |                                          |
| 715    | C   | C   | . LEU LEU LEU A A 94 94 | . 0.1185 0.1076 0.1460 -0.0002 -0.0119   |
| 0.0076 | 1   | .   |                         |                                          |
| 716    | O   | O   | . LEU LEU LEU A A 94 94 | . 0.1352 0.1091 0.1663 -0.0017 -0.0071   |
| 0.0052 | 1   | .   |                         |                                          |
| 717    | N   | N   | . GLU GLU GLU A A 95 95 | . 0.1585 0.1158 0.1293 -0.0024 -0.0155   |
| 0.0001 | 1   | .   |                         |                                          |
| 718    | CA  | CA  | . GLU GLU GLU A A 95 95 | . 0.1595 0.1380 0.1726 0.0184 -0.0078    |
| 0.0170 | 1   | .   |                         |                                          |
| 719    | CB  | CB  | . GLU GLU GLU A A 95 95 | . 0.2292 0.1750 0.2065 0.0081 -0.0006    |
| 0.0008 | 1   | .   |                         |                                          |
| 720    | CG  | CG  | . GLU GLU GLU A A 95 95 | . 0.3194 0.2038 0.2457 -0.0094 -0.0564 - |
| 0.0157 | 1   | .   |                         |                                          |
| 721    | CD  | CD  | . GLU GLU GLU A A 95 95 | . 0.4688 0.3791 0.4989 0.0381 -0.0903 -  |
| 0.0408 | 1   | .   |                         |                                          |
| 722    | OE1 | OE1 | . GLU GLU GLU A A 95 95 | . 0.5947 0.4088 0.6278 0.0908 -0.0093 -  |
| 0.0839 | 1   | .   |                         |                                          |
| 723    | OE2 | OE2 | . GLU GLU GLU A A 95 95 | . 0.6066 0.4903 0.5689 0.0328 -0.1103 -  |
| 0.0892 | 1   | .   |                         |                                          |
| 724    | C   | C   | . GLU GLU GLU A A 95 95 | . 0.1380 0.1308 0.1590 0.0064 -0.0050    |
| 0.0185 | 1   | .   |                         |                                          |
| 725    | O   | O   | . GLU GLU GLU A A 95 95 | . 0.1608 0.1460 0.2007 -0.0042 -0.0071   |
| 0.0232 | 1   | .   |                         |                                          |
| 726    | N   | N   | . LEU LEU LEU A A 96 96 | . 0.1285 0.1023 0.1204 -0.0280 -0.0162   |
| 0.0017 | 1   | .   |                         |                                          |
| 727    | CA  | CA  | . LEU LEU LEU A A 96 96 | . 0.1469 0.1364 0.1625 0.0004 -0.0138 -  |
| 0.0127 | 1   | .   |                         |                                          |
| 728    | CB  | CB  | . LEU LEU LEU A A 96 96 | . 0.1225 0.1323 0.1482 0.0194 -0.0319    |
| 0.0027 | 1   | .   |                         |                                          |
| 729    | CG  | CG  | . LEU LEU LEU A A 96 96 | . 0.1680 0.0903 0.1687 0.0151 0.0116     |
| 0.0185 | 1   | .   |                         |                                          |
| 730    | CD1 | CD1 | . LEU LEU LEU A A 96 96 | . 0.1449 0.0779 0.1745 -0.0171 0.0073 -  |
| 0.0041 | 1   | .   |                         |                                          |
| 731    | CD2 | CD2 | . LEU LEU LEU A A 96 96 | . 0.2050 0.1696 0.1346 0.0141 -0.0268    |
| 0.0355 | 1   | .   |                         |                                          |
| 732    | C   | C   | . LEU LEU LEU A A 96 96 | . 0.1672 0.1331 0.1357 -0.0055 0.0074 -  |
| 0.0195 | 1   | .   |                         |                                          |
| 733    | O   | O   | . LEU LEU LEU A A 96 96 | . 0.1628 0.1254 0.1821 -0.0040 0.0116 -  |
| 0.0271 | 1   | .   |                         |                                          |
| 734    | N   | N   | . ASP ASP ASP A A 97 97 | . 0.1393 0.1263 0.1343 -0.0219 -0.0159   |
| 0.0140 | 1   | .   |                         |                                          |
| 735    | CA  | CA  | . ASP ASP ASP A A 97 97 | . 0.1290 0.0882 0.1332 -0.0092 -0.0117 - |
| 0.0035 | 1   | .   |                         |                                          |
| 736    | CB  | CB  | . ASP ASP ASP A A 97 97 | . 0.1253 0.0898 0.1551 -0.0080 -0.0071   |
| 0.0095 | 1   | .   |                         |                                          |
| 737    | CG  | CG  | . ASP ASP ASP A A 97 97 | . 0.1184 0.0910 0.1233 0.0166 0.0080 -   |
| 0.0025 | 1   | .   |                         |                                          |
| 738    | OD1 | OD1 | . ASP ASP ASP A A 97 97 | . 0.1428 0.1238 0.1365 -0.0170 0.0010    |
| 0.0041 | 1   | .   |                         |                                          |
| 739    | OD2 | OD2 | . ASP ASP ASP A A 97 97 | . 0.1467 0.1367 0.1277 -0.0120 -0.0105   |
| 0.0085 | 1   | .   |                         |                                          |
| 740    | C   | C   | . ASP ASP ASP A A 97 97 | . 0.1424 0.1318 0.1460 -0.0032 -0.0150 - |
| 0.0109 | 1   | .   |                         |                                          |
| 741    | O   | O   | . ASP ASP ASP A A 97 97 | . 0.1598 0.1568 0.2017 0.0216 -0.0333 -  |
| 0.0136 | 1   | .   |                         |                                          |
| 742    | N   | N   | . GLY GLY GLY A A 98 98 | . 0.1566 0.1015 0.1533 0.0003 -0.0195    |
| 0.0272 | 1   | .   |                         |                                          |



|        |     |     |                             |        |        |        |         |         |   |
|--------|-----|-----|-----------------------------|--------|--------|--------|---------|---------|---|
| 743    | CA  | CA  | . GLY GLY GLY A A 98 98 .   | 0.1485 | 0.1156 | 0.1993 | -0.0011 | -0.0293 |   |
| 0.0368 | 1   | .   |                             |        |        |        |         |         |   |
| 744    | C   | C   | . GLY GLY GLY A A 98 98 .   | 0.1720 | 0.1576 | 0.2103 | 0.0007  | -0.0376 |   |
| 0.0314 | 1   | .   |                             |        |        |        |         |         |   |
| 745    | O   | O   | . GLY GLY GLY A A 98 98 .   | 0.1993 | 0.1503 | 0.2539 | -0.0023 | -0.0453 |   |
| 0.0601 | 1   | .   |                             |        |        |        |         |         |   |
| 746    | N   | N   | . THR THR THR A A 99 99 .   | 0.1675 | 0.1635 | 0.1691 | 0.0033  | -0.0211 |   |
| 0.0293 | 1   | .   |                             |        |        |        |         |         |   |
| 747    | CA  | CA  | . THR THR THR A A 99 99 .   | 0.1872 | 0.1582 | 0.1893 | -0.0017 | -0.0196 |   |
| 0.0204 | 1   | .   |                             |        |        |        |         |         |   |
| 748    | CB  | CB  | . THR THR THR A A 99 99 .   | 0.1529 | 0.1197 | 0.1882 | 0.0279  | 0.0000  | - |
| 0.0022 | 1   | .   |                             |        |        |        |         |         |   |
| 749    | OG1 | OG1 | . THR THR THR A A 99 99 .   | 0.1773 | 0.1493 | 0.1906 | 0.0205  | 0.0155  |   |
| 0.0605 | 1   | .   |                             |        |        |        |         |         |   |
| 750    | CG2 | CG2 | . THR THR THR A A 99 99 .   | 0.1820 | 0.2055 | 0.1700 | 0.0022  | -0.0173 | - |
| 0.0356 | 1   | .   |                             |        |        |        |         |         |   |
| 751    | C   | C   | . THR THR THR A A 99 99 .   | 0.1773 | 0.1738 | 0.1821 | 0.0146  | -0.0124 |   |
| 0.0157 | 1   | .   |                             |        |        |        |         |         |   |
| 752    | O   | O   | . THR THR THR A A 99 99 .   | 0.2014 | 0.1866 | 0.2346 | 0.0293  | -0.0012 | - |
| 0.0031 | 1   | .   |                             |        |        |        |         |         |   |
| 753    | N   | N   | . GLU GLU GLU A A 100 100 . | 0.2085 | 0.1535 | 0.1767 | -0.0007 | -0.0168 |   |
| 0.0221 | 1   | .   |                             |        |        |        |         |         |   |
| 754    | CA  | CA  | . GLU GLU GLU A A 100 100 . | 0.2215 | 0.1540 | 0.2001 | -0.0064 | -0.0310 | - |
| 0.0010 | 1   | .   |                             |        |        |        |         |         |   |
| 755    | CB  | CB  | . GLU GLU GLU A A 100 100 . | 0.2730 | 0.2050 | 0.2588 | 0.0038  | -0.0361 |   |
| 0.0106 | 1   | .   |                             |        |        |        |         |         |   |
| 756    | CG  | CG  | . GLU GLU GLU A A 100 100 . | 0.3961 | 0.2900 | 0.3375 | -0.0004 | -0.0439 | - |
| 0.0163 | 1   | .   |                             |        |        |        |         |         |   |
| 757    | CD  | CD  | . GLU GLU GLU A A 100 100 . | 0.5635 | 0.4758 | 0.4680 | 0.0208  | 0.0227  |   |
| 0.0135 | 1   | .   |                             |        |        |        |         |         |   |
| 758    | OE1 | OE1 | . GLU GLU GLU A A 100 100 . | 0.6460 | 0.4728 | 0.5531 | 0.0010  | -0.0254 |   |
| 0.0624 | 1   | .   |                             |        |        |        |         |         |   |
| 759    | OE2 | OE2 | . GLU GLU GLU A A 100 100 . | 0.6960 | 0.5509 | 0.5728 | 0.0764  | 0.0308  | - |
| 0.0107 | 1   | .   |                             |        |        |        |         |         |   |
| 760    | C   | C   | . GLU GLU GLU A A 100 100 . | 0.1865 | 0.1614 | 0.1870 | 0.0052  | -0.0149 |   |
| 0.0102 | 1   | .   |                             |        |        |        |         |         |   |
| 761    | O   | O   | . GLU GLU GLU A A 100 100 . | 0.2421 | 0.1598 | 0.2011 | 0.0026  | 0.0051  |   |
| 0.0096 | 1   | .   |                             |        |        |        |         |         |   |
| 762    | N   | N   | . ASN ASN ASN A A 101 101 . | 0.1373 | 0.1363 | 0.1609 | 0.0053  | -0.0396 |   |
| 0.0161 | 1   | .   |                             |        |        |        |         |         |   |
| 763    | CA  | CA  | . ASN ASN ASN A A 101 101 . | 0.1376 | 0.1508 | 0.1580 | 0.0138  | -0.0246 |   |
| 0.0199 | 1   | .   |                             |        |        |        |         |         |   |
| 764    | CB  | CB  | . ASN ASN ASN A A 101 101 . | 0.1747 | 0.1932 | 0.2463 | 0.0011  | -0.0205 |   |
| 0.0408 | 1   | .   |                             |        |        |        |         |         |   |
| 765    | CG  | CG  | . ASN ASN ASN A A 101 101 . | 0.2900 | 0.3458 | 0.3109 | -0.0222 | -0.0086 | - |
| 0.0174 | 1   | .   |                             |        |        |        |         |         |   |
| 766    | OD1 | OD1 | . ASN ASN ASN A A 101 101 . | 0.4594 | 0.5087 | 0.4524 | -0.0649 | 0.0032  |   |
| 0.0151 | 1   | .   |                             |        |        |        |         |         |   |
| 767    | ND2 | ND2 | . ASN ASN ASN A A 101 101 . | 0.2964 | 0.4470 | 0.3701 | -0.1051 | 0.0340  | - |
| 0.0882 | 1   | .   |                             |        |        |        |         |         |   |
| 768    | C   | C   | . ASN ASN ASN A A 101 101 . | 0.1398 | 0.1233 | 0.1291 | -0.0037 | -0.0126 |   |
| 0.0145 | 1   | .   |                             |        |        |        |         |         |   |
| 769    | O   | O   | . ASN ASN ASN A A 101 101 . | 0.1617 | 0.1193 | 0.1563 | -0.0121 | -0.0007 |   |
| 0.0218 | 1   | .   |                             |        |        |        |         |         |   |
| 770    | N   | N   | . LYS LYS LYS A A 102 102 . | 0.1145 | 0.1326 | 0.1165 | 0.0029  | -0.0054 |   |
| 0.0051 | 1   | .   |                             |        |        |        |         |         |   |
| 771    | CA  | CA  | . LYS LYS LYS A A 102 102 . | 0.1487 | 0.1294 | 0.1373 | 0.0077  | -0.0071 | - |
| 0.0034 | 1   | .   |                             |        |        |        |         |         |   |
| 772    | CB  | CB  | . LYS LYS LYS A A 102 102 . | 0.1612 | 0.1135 | 0.1346 | 0.0082  | 0.0184  |   |
| 0.0197 | 1   | .   |                             |        |        |        |         |         |   |

|        |     |     |                             |        |        |        |         |         |   |
|--------|-----|-----|-----------------------------|--------|--------|--------|---------|---------|---|
| 773    | CG  | CG  | . LYS LYS LYS A A 102 102 . | 0.1379 | 0.0879 | 0.1275 | 0.0143  | -0.0036 | - |
| 0.0040 | 1   | .   |                             |        |        |        |         |         |   |
| 774    | CD  | CD  | . LYS LYS LYS A A 102 102 . | 0.1829 | 0.1348 | 0.1744 | 0.0234  | 0.0159  | - |
| 0.0118 | 1   | .   |                             |        |        |        |         |         |   |
| 775    | CE  | CE  | . LYS LYS LYS A A 102 102 . | 0.1819 | 0.1449 | 0.1613 | -0.0269 | -0.0022 |   |
| 0.0182 | 1   | .   |                             |        |        |        |         |         |   |
| 776    | NZ  | NZ  | . LYS LYS LYS A A 102 102 . | 0.1286 | 0.1333 | 0.1220 | -0.0346 | 0.0079  |   |
| 0.0074 | 1   | .   |                             |        |        |        |         |         |   |
| 777    | C   | C   | . LYS LYS LYS A A 102 102 . | 0.1399 | 0.1315 | 0.1448 | 0.0064  | 0.0078  |   |
| 0.0106 | 1   | .   |                             |        |        |        |         |         |   |
| 778    | O   | O   | . LYS LYS LYS A A 102 102 . | 0.1432 | 0.1387 | 0.1363 | 0.0124  | -0.0043 |   |
| 0.0022 | 1   | .   |                             |        |        |        |         |         |   |
| 779    | N   | N   | . SER SER SER A A 103 103 . | 0.1234 | 0.1053 | 0.1352 | 0.0120  | -0.0029 | - |
| 0.0113 | 1   | .   |                             |        |        |        |         |         |   |
| 780    | CA  | CA  | . SER SER SER A A 103 103 . | 0.1447 | 0.1496 | 0.1607 | -0.0001 | 0.0085  |   |
| 0.0013 | 1   | .   |                             |        |        |        |         |         |   |
| 781    | CB  | CB  | . SER SER SER A A 103 103 . | 0.1388 | 0.1772 | 0.1727 | 0.0002  | -0.0132 | - |
| 0.0053 | 1   | .   |                             |        |        |        |         |         |   |
| 782    | OG  | OG  | . SER SER SER A A 103 103 . | 0.1606 | 0.1770 | 0.2647 | 0.0446  | 0.0091  |   |
| 0.0439 | 1   | .   |                             |        |        |        |         |         |   |
| 783    | C   | C   | . SER SER SER A A 103 103 . | 0.1493 | 0.1620 | 0.1632 | 0.0047  | 0.0140  | - |
| 0.0276 | 1   | .   |                             |        |        |        |         |         |   |
| 784    | O   | O   | . SER SER SER A A 103 103 . | 0.2188 | 0.1972 | 0.1840 | -0.0129 | 0.0221  | - |
| 0.0242 | 1   | .   |                             |        |        |        |         |         |   |
| 785    | N   | N   | . LYS LYS LYS A A 104 104 . | 0.1613 | 0.1186 | 0.1402 | 0.0049  | 0.0008  | - |
| 0.0279 | 1   | .   |                             |        |        |        |         |         |   |
| 786    | CA  | CA  | . LYS LYS LYS A A 104 104 . | 0.1601 | 0.1494 | 0.1534 | 0.0287  | -0.0224 | - |
| 0.0164 | 1   | .   |                             |        |        |        |         |         |   |
| 787    | CB  | CB  | . LYS LYS LYS A A 104 104 . | 0.1832 | 0.1502 | 0.1436 | 0.0194  | -0.0108 | - |
| 0.0359 | 1   | .   |                             |        |        |        |         |         |   |
| 788    | CG  | CG  | . LYS LYS LYS A A 104 104 . | 0.1893 | 0.1682 | 0.2096 | 0.0036  | -0.0643 | - |
| 0.0301 | 1   | .   |                             |        |        |        |         |         |   |
| 789    | CD  | CD  | . LYS LYS LYS A A 104 104 . | 0.2379 | 0.2148 | 0.2916 | -0.0289 | -0.0829 | - |
| 0.0220 | 1   | .   |                             |        |        |        |         |         |   |
| 790    | CE  | CE  | . LYS LYS LYS A A 104 104 . | 0.2888 | 0.2731 | 0.3445 | -0.0652 | -0.0916 |   |
| 0.0080 | 1   | .   |                             |        |        |        |         |         |   |
| 791    | NZ  | NZ  | . LYS LYS LYS A A 104 104 . | 0.3275 | 0.3013 | 0.3704 | -0.1053 | -0.0117 | - |
| 0.0128 | 1   | .   |                             |        |        |        |         |         |   |
| 792    | C   | C   | . LYS LYS LYS A A 104 104 . | 0.1663 | 0.1593 | 0.1438 | 0.0367  | -0.0038 | - |
| 0.0036 | 1   | .   |                             |        |        |        |         |         |   |
| 793    | O   | O   | . LYS LYS LYS A A 104 104 . | 0.2114 | 0.1930 | 0.1602 | 0.0501  | -0.0015 |   |
| 0.0022 | 1   | .   |                             |        |        |        |         |         |   |
| 794    | N   | N   | . PHE PHE PHE A A 105 105 . | 0.1537 | 0.1042 | 0.1118 | 0.0285  | 0.0057  | - |
| 0.0105 | 1   | .   |                             |        |        |        |         |         |   |
| 795    | CA  | CA  | . PHE PHE PHE A A 105 105 . | 0.1172 | 0.1143 | 0.1205 | 0.0018  | 0.0036  |   |
| 0.0002 | 1   | .   |                             |        |        |        |         |         |   |
| 796    | CB  | CB  | . PHE PHE PHE A A 105 105 . | 0.1271 | 0.1409 | 0.1669 | -0.0011 | 0.0139  |   |
| 0.0011 | 1   | .   |                             |        |        |        |         |         |   |
| 797    | CG  | CG  | . PHE PHE PHE A A 105 105 . | 0.1281 | 0.1126 | 0.1200 | -0.0176 | -0.0176 | - |
| 0.0022 | 1   | .   |                             |        |        |        |         |         |   |
| 798    | CD1 | CD1 | . PHE PHE PHE A A 105 105 . | 0.1458 | 0.1220 | 0.1625 | -0.0026 | -0.0267 |   |
| 0.0239 | 1   | .   |                             |        |        |        |         |         |   |
| 799    | CE1 | CE1 | . PHE PHE PHE A A 105 105 . | 0.1084 | 0.1263 | 0.1546 | -0.0064 | 0.0032  |   |
| 0.0126 | 1   | .   |                             |        |        |        |         |         |   |
| 800    | CZ  | CZ  | . PHE PHE PHE A A 105 105 . | 0.1655 | 0.1532 | 0.1629 | -0.0060 | -0.0055 | - |
| 0.0185 | 1   | .   |                             |        |        |        |         |         |   |
| 801    | CE2 | CE2 | . PHE PHE PHE A A 105 105 . | 0.1909 | 0.1357 | 0.1545 | -0.0283 | -0.0202 | - |
| 0.0141 | 1   | .   |                             |        |        |        |         |         |   |
| 802    | CD2 | CD2 | . PHE PHE PHE A A 105 105 . | 0.1647 | 0.1504 | 0.1469 | -0.0114 | -0.0376 |   |
| 0.0158 | 1   | .   |                             |        |        |        |         |         |   |

|        |     |     |                             |        |        |        |         |         |   |
|--------|-----|-----|-----------------------------|--------|--------|--------|---------|---------|---|
| 803    | C   | C   | . PHE PHE PHE A A 105 105 . | 0.1210 | 0.1110 | 0.1208 | 0.0089  | 0.0053  | - |
| 0.0103 | 1   | .   |                             |        |        |        |         |         |   |
| 804    | O   | O   | . PHE PHE PHE A A 105 105 . | 0.1168 | 0.1311 | 0.1258 | 0.0135  | -0.0043 | - |
| 0.0108 | 1   | .   |                             |        |        |        |         |         |   |
| 805    | N   | N   | . GLY GLY GLY A A 106 106 . | 0.1181 | 0.1007 | 0.1419 | 0.0088  | -0.0080 | - |
| 0.0089 | 1   | .   |                             |        |        |        |         |         |   |
| 806    | CA  | CA  | . GLY GLY GLY A A 106 106 . | 0.1226 | 0.0971 | 0.1282 | 0.0116  | 0.0216  | - |
| 0.0146 | 1   | .   |                             |        |        |        |         |         |   |
| 807    | C   | C   | . GLY GLY GLY A A 106 106 . | 0.1209 | 0.1139 | 0.1235 | 0.0052  | 0.0071  |   |
| 0.0106 | 1   | .   |                             |        |        |        |         |         |   |
| 808    | O   | O   | . GLY GLY GLY A A 106 106 . | 0.1086 | 0.1028 | 0.1152 | 0.0078  | 0.0050  |   |
| 0.0291 | 1   | .   |                             |        |        |        |         |         |   |
| 809    | N   | N   | . ALA ALA ALA A A 107 107 . | 0.1156 | 0.0869 | 0.0802 | -0.0056 | 0.0142  |   |
| 0.0062 | 1   | .   |                             |        |        |        |         |         |   |
| 810    | CA  | CA  | . ALA ALA ALA A A 107 107 . | 0.1002 | 0.0858 | 0.1114 | 0.0048  | 0.0024  |   |
| 0.0090 | 1   | .   |                             |        |        |        |         |         |   |
| 811    | CB  | CB  | . ALA ALA ALA A A 107 107 . | 0.1188 | 0.1427 | 0.1184 | 0.0100  | -0.0271 | - |
| 0.0149 | 1   | .   |                             |        |        |        |         |         |   |
| 812    | C   | C   | . ALA ALA ALA A A 107 107 . | 0.1080 | 0.1099 | 0.1256 | 0.0009  | -0.0009 |   |
| 0.0023 | 1   | .   |                             |        |        |        |         |         |   |
| 813    | O   | O   | . ALA ALA ALA A A 107 107 . | 0.1236 | 0.1140 | 0.1129 | 0.0080  | 0.0139  |   |
| 0.0075 | 1   | .   |                             |        |        |        |         |         |   |
| 814    | N   | N   | . ASN ASN ASN A A 108 108 . | 0.1293 | 0.0871 | 0.1106 | 0.0074  | -0.0018 | - |
| 0.0060 | 1   | .   |                             |        |        |        |         |         |   |
| 815    | CA  | CA  | . ASN ASN ASN A A 108 108 . | 0.0889 | 0.0858 | 0.1143 | 0.0055  | 0.0117  |   |
| 0.0024 | 1   | .   |                             |        |        |        |         |         |   |
| 816    | CB  | CB  | . ASN ASN ASN A A 108 108 . | 0.1119 | 0.0940 | 0.0968 | 0.0200  | 0.0387  | - |
| 0.0054 | 1   | .   |                             |        |        |        |         |         |   |
| 817    | CG  | CG  | . ASN ASN ASN A A 108 108 . | 0.0919 | 0.0925 | 0.1023 | -0.0022 | 0.0202  |   |
| 0.0100 | 1   | .   |                             |        |        |        |         |         |   |
| 818    | OD1 | OD1 | . ASN ASN ASN A A 108 108 . | 0.1226 | 0.1089 | 0.1124 | 0.0156  | 0.0239  |   |
| 0.0080 | 1   | .   |                             |        |        |        |         |         |   |
| 819    | ND2 | ND2 | . ASN ASN ASN A A 108 108 . | 0.1069 | 0.1338 | 0.0997 | -0.0149 | -0.0069 |   |
| 0.0022 | 1   | .   |                             |        |        |        |         |         |   |
| 820    | C   | C   | . ASN ASN ASN A A 108 108 . | 0.1168 | 0.0967 | 0.1149 | 0.0074  | 0.0101  |   |
| 0.0055 | 1   | .   |                             |        |        |        |         |         |   |
| 821    | O   | O   | . ASN ASN ASN A A 108 108 . | 0.1011 | 0.1123 | 0.1438 | 0.0038  | -0.0034 |   |
| 0.0106 | 1   | .   |                             |        |        |        |         |         |   |
| 822    | N   | N   | . ALA ALA ALA A A 109 109 . | 0.1088 | 0.0963 | 0.0932 | -0.0001 | -0.0058 | - |
| 0.0157 | 1   | .   |                             |        |        |        |         |         |   |
| 823    | CA  | CA  | . ALA ALA ALA A A 109 109 . | 0.0872 | 0.0865 | 0.0927 | 0.0004  | -0.0042 | - |
| 0.0025 | 1   | .   |                             |        |        |        |         |         |   |
| 824    | CB  | CB  | . ALA ALA ALA A A 109 109 . | 0.1132 | 0.0952 | 0.1373 | 0.0203  | 0.0080  | - |
| 0.0036 | 1   | .   |                             |        |        |        |         |         |   |
| 825    | C   | C   | . ALA ALA ALA A A 109 109 . | 0.1062 | 0.0884 | 0.1159 | 0.0136  | -0.0127 | - |
| 0.0027 | 1   | .   |                             |        |        |        |         |         |   |
| 826    | O   | O   | . ALA ALA ALA A A 109 109 . | 0.1038 | 0.1190 | 0.1112 | 0.0072  | 0.0055  |   |
| 0.0036 | 1   | .   |                             |        |        |        |         |         |   |
| 827    | N   | N   | . ILE ILE ILE A A 110 110 . | 0.0979 | 0.0973 | 0.0977 | 0.0133  | 0.0083  |   |
| 0.0200 | 1   | .   |                             |        |        |        |         |         |   |
| 828    | CA  | CA  | . ILE ILE ILE A A 110 110 . | 0.1090 | 0.0872 | 0.0978 | 0.0024  | 0.0111  | - |
| 0.0029 | 1   | .   |                             |        |        |        |         |         |   |
| 829    | CB  | CB  | . ILE ILE ILE A A 110 110 . | 0.1085 | 0.0748 | 0.1006 | 0.0107  | 0.0115  |   |
| 0.0040 | 1   | .   |                             |        |        |        |         |         |   |
| 830    | CG1 | CG1 | . ILE ILE ILE A A 110 110 . | 0.1386 | 0.0997 | 0.0999 | 0.0030  | -0.0387 | - |
| 0.0198 | 1   | .   |                             |        |        |        |         |         |   |
| 831    | CD  | CD  | . ILE ILE ILE A A 110 110 . | 0.1557 | 0.1101 | 0.1682 | 0.0209  | -0.0717 | - |
| 0.0066 | 1   | .   |                             |        |        |        |         |         |   |
| 832    | CG2 | CG2 | . ILE ILE ILE A A 110 110 . | 0.1156 | 0.1460 | 0.1151 | -0.0110 | 0.0054  |   |
| 0.0063 | 1   | .   |                             |        |        |        |         |         |   |

|        |     |     |                             |        |        |        |         |         |   |
|--------|-----|-----|-----------------------------|--------|--------|--------|---------|---------|---|
| 833    | C   | C   | . ILE ILE ILE A A 110 110 . | 0.0732 | 0.0753 | 0.0870 | -0.0066 | 0.0165  |   |
| 0.0065 | 1   | .   |                             |        |        |        |         |         |   |
| 834    | O   | O   | . ILE ILE ILE A A 110 110 . | 0.0912 | 0.0989 | 0.1086 | 0.0034  | 0.0058  |   |
| 0.0075 | 1   | .   |                             |        |        |        |         |         |   |
| 835    | N   | N   | . LEU LEU LEU A A 111 111 . | 0.0936 | 0.0706 | 0.0994 | -0.0032 | 0.0003  | - |
| 0.0067 | 1   | .   |                             |        |        |        |         |         |   |
| 836    | CA  | CA  | . LEU LEU LEU A A 111 111 . | 0.0968 | 0.0805 | 0.1159 | -0.0012 | -0.0038 | - |
| 0.0097 | 1   | .   |                             |        |        |        |         |         |   |
| 837    | CB  | CB  | . LEU LEU LEU A A 111 111 . | 0.1025 | 0.0725 | 0.1096 | -0.0152 | 0.0078  | - |
| 0.0150 | 1   | .   |                             |        |        |        |         |         |   |
| 838    | CG  | CG  | . LEU LEU LEU A A 111 111 . | 0.0965 | 0.1051 | 0.1106 | 0.0094  | 0.0161  | - |
| 0.0034 | 1   | .   |                             |        |        |        |         |         |   |
| 839    | CD1 | CD1 | . LEU LEU LEU A A 111 111 . | 0.1087 | 0.1225 | 0.1193 | 0.0203  | 0.0432  | - |
| 0.0294 | 1   | .   |                             |        |        |        |         |         |   |
| 840    | CD2 | CD2 | . LEU LEU LEU A A 111 111 . | 0.1232 | 0.1207 | 0.1612 | -0.0289 | -0.0137 | - |
| 0.0213 | 1   | .   |                             |        |        |        |         |         |   |
| 841    | C   | C   | . LEU LEU LEU A A 111 111 . | 0.0891 | 0.0879 | 0.0991 | -0.0168 | 0.0034  |   |
| 0.0072 | 1   | .   |                             |        |        |        |         |         |   |
| 842    | O   | O   | . LEU LEU LEU A A 111 111 . | 0.0985 | 0.0929 | 0.1065 | -0.0163 | 0.0021  | - |
| 0.0093 | 1   | .   |                             |        |        |        |         |         |   |
| 843    | N   | N   | . GLY GLY GLY A A 112 112 . | 0.0920 | 0.0788 | 0.0878 | -0.0192 | -0.0138 |   |
| 0.0044 | 1   | .   |                             |        |        |        |         |         |   |
| 844    | CA  | CA  | . GLY GLY GLY A A 112 112 . | 0.0620 | 0.0973 | 0.1229 | 0.0026  | 0.0043  |   |
| 0.0167 | 1   | .   |                             |        |        |        |         |         |   |
| 845    | C   | C   | . GLY GLY GLY A A 112 112 . | 0.0789 | 0.0670 | 0.1023 | -0.0093 | -0.0082 | - |
| 0.0066 | 1   | .   |                             |        |        |        |         |         |   |
| 846    | O   | O   | . GLY GLY GLY A A 112 112 . | 0.1116 | 0.0930 | 0.0929 | 0.0039  | 0.0091  |   |
| 0.0159 | 1   | .   |                             |        |        |        |         |         |   |
| 847    | N   | N   | . VAL VAL VAL A A 113 113 . | 0.1177 | 0.0831 | 0.1087 | -0.0220 | -0.0096 | - |
| 0.0112 | 1   | .   |                             |        |        |        |         |         |   |
| 848    | CA  | CA  | . VAL VAL VAL A A 113 113 . | 0.1017 | 0.0827 | 0.0954 | 0.0074  | 0.0147  | - |
| 0.0119 | 1   | .   |                             |        |        |        |         |         |   |
| 849    | CB  | CB  | . VAL VAL VAL A A 113 113 . | 0.1247 | 0.0779 | 0.1015 | -0.0100 | 0.0254  | - |
| 0.0151 | 1   | .   |                             |        |        |        |         |         |   |
| 850    | CG1 | CG1 | . VAL VAL VAL A A 113 113 . | 0.1099 | 0.0847 | 0.1181 | -0.0188 | 0.0000  |   |
| 0.0089 | 1   | .   |                             |        |        |        |         |         |   |
| 851    | CG2 | CG2 | . VAL VAL VAL A A 113 113 . | 0.1103 | 0.1133 | 0.1131 | 0.0094  | 0.0018  | - |
| 0.0312 | 1   | .   |                             |        |        |        |         |         |   |
| 852    | C   | C   | . VAL VAL VAL A A 113 113 . | 0.1073 | 0.0801 | 0.0874 | -0.0089 | -0.0009 |   |
| 0.0054 | 1   | .   |                             |        |        |        |         |         |   |
| 853    | O   | O   | . VAL VAL VAL A A 113 113 . | 0.1243 | 0.1078 | 0.1037 | -0.0104 | 0.0075  |   |
| 0.0004 | 1   | .   |                             |        |        |        |         |         |   |
| 854    | N   | N   | . SER SER SER A A 114 114 . | 0.1033 | 0.0842 | 0.0869 | -0.0244 | 0.0105  |   |
| 0.0010 | 1   | .   |                             |        |        |        |         |         |   |
| 855    | CA  | CA  | . SER SER SER A A 114 114 . | 0.0830 | 0.0728 | 0.0854 | 0.0040  | 0.0097  | - |
| 0.0052 | 1   | .   |                             |        |        |        |         |         |   |
| 856    | CB  | CB  | . SER SER SER A A 114 114 . | 0.1024 | 0.1206 | 0.0838 | -0.0118 | -0.0107 | - |
| 0.0103 | 1   | .   |                             |        |        |        |         |         |   |
| 857    | OG  | OG  | . SER SER SER A A 114 114 . | 0.1406 | 0.1254 | 0.1115 | 0.0053  | 0.0169  |   |
| 0.0036 | 1   | .   |                             |        |        |        |         |         |   |
| 858    | C   | C   | . SER SER SER A A 114 114 . | 0.1087 | 0.0950 | 0.1102 | 0.0018  | 0.0095  |   |
| 0.0070 | 1   | .   |                             |        |        |        |         |         |   |
| 859    | O   | O   | . SER SER SER A A 114 114 . | 0.0956 | 0.0909 | 0.1221 | -0.0050 | 0.0208  |   |
| 0.0062 | 1   | .   |                             |        |        |        |         |         |   |
| 860    | N   | N   | . LEU LEU LEU A A 115 115 . | 0.1045 | 0.1018 | 0.0892 | -0.0004 | 0.0024  | - |
| 0.0064 | 1   | .   |                             |        |        |        |         |         |   |
| 861    | CA  | CA  | . LEU LEU LEU A A 115 115 . | 0.1069 | 0.0867 | 0.0794 | -0.0135 | -0.0015 |   |
| 0.0123 | 1   | .   |                             |        |        |        |         |         |   |
| 862    | CB  | CB  | . LEU LEU LEU A A 115 115 . | 0.1005 | 0.1208 | 0.1046 | -0.0146 | -0.0025 |   |
| 0.0130 | 1   | .   |                             |        |        |        |         |         |   |

|        |     |     |                             |        |        |        |         |         |   |
|--------|-----|-----|-----------------------------|--------|--------|--------|---------|---------|---|
| 863    | CG  | CG  | . LEU LEU LEU A A 115 115 . | 0.0656 | 0.1039 | 0.0765 | -0.0123 | 0.0058  | - |
| 0.0101 | 1   | .   |                             |        |        |        |         |         |   |
| 864    | CD1 | CD1 | . LEU LEU LEU A A 115 115 . | 0.0997 | 0.1189 | 0.1177 | -0.0238 | 0.0123  |   |
| 0.0498 | 1   | .   |                             |        |        |        |         |         |   |
| 865    | CD2 | CD2 | . LEU LEU LEU A A 115 115 . | 0.1185 | 0.1197 | 0.1496 | 0.0046  | -0.0068 | - |
| 0.0424 | 1   | .   |                             |        |        |        |         |         |   |
| 866    | C   | C   | . LEU LEU LEU A A 115 115 . | 0.0749 | 0.0699 | 0.0910 | -0.0093 | 0.0097  | - |
| 0.0006 | 1   | .   |                             |        |        |        |         |         |   |
| 867    | O   | O   | . LEU LEU LEU A A 115 115 . | 0.1122 | 0.0879 | 0.1156 | -0.0051 | 0.0013  | - |
| 0.0127 | 1   | .   |                             |        |        |        |         |         |   |
| 868    | N   | N   | . ALA ALA ALA A A 116 116 . | 0.1046 | 0.1211 | 0.0900 | -0.0099 | 0.0016  |   |
| 0.0152 | 1   | .   |                             |        |        |        |         |         |   |
| 869    | CA  | CA  | . ALA ALA ALA A A 116 116 . | 0.0859 | 0.1088 | 0.0958 | -0.0034 | 0.0094  | - |
| 0.0151 | 1   | .   |                             |        |        |        |         |         |   |
| 870    | CB  | CB  | . ALA ALA ALA A A 116 116 . | 0.0986 | 0.1087 | 0.1048 | 0.0072  | 0.0085  | - |
| 0.0242 | 1   | .   |                             |        |        |        |         |         |   |
| 871    | C   | C   | . ALA ALA ALA A A 116 116 . | 0.1052 | 0.0976 | 0.0759 | 0.0017  | 0.0011  |   |
| 0.0028 | 1   | .   |                             |        |        |        |         |         |   |
| 872    | O   | O   | . ALA ALA ALA A A 116 116 . | 0.1069 | 0.1066 | 0.1064 | -0.0108 | 0.0028  | - |
| 0.0083 | 1   | .   |                             |        |        |        |         |         |   |
| 873    | N   | N   | . VAL VAL VAL A A 117 117 . | 0.1032 | 0.0985 | 0.1135 | -0.0215 | 0.0117  | - |
| 0.0010 | 1   | .   |                             |        |        |        |         |         |   |
| 874    | CA  | CA  | . VAL VAL VAL A A 117 117 . | 0.1111 | 0.1026 | 0.0917 | -0.0164 | 0.0159  |   |
| 0.0055 | 1   | .   |                             |        |        |        |         |         |   |
| 875    | CB  | CB  | . VAL VAL VAL A A 117 117 . | 0.0965 | 0.0934 | 0.1209 | -0.0291 | 0.0093  |   |
| 0.0044 | 1   | .   |                             |        |        |        |         |         |   |
| 876    | CG1 | CG1 | . VAL VAL VAL A A 117 117 . | 0.1523 | 0.1506 | 0.1246 | -0.0321 | 0.0227  |   |
| 0.0106 | 1   | .   |                             |        |        |        |         |         |   |
| 877    | CG2 | CG2 | . VAL VAL VAL A A 117 117 . | 0.1311 | 0.0963 | 0.1056 | 0.0126  | 0.0284  |   |
| 0.0049 | 1   | .   |                             |        |        |        |         |         |   |
| 878    | C   | C   | . VAL VAL VAL A A 117 117 . | 0.1031 | 0.1043 | 0.0953 | -0.0171 | 0.0108  |   |
| 0.0137 | 1   | .   |                             |        |        |        |         |         |   |
| 879    | O   | O   | . VAL VAL VAL A A 117 117 . | 0.1176 | 0.1257 | 0.1257 | -0.0098 | 0.0065  |   |
| 0.0048 | 1   | .   |                             |        |        |        |         |         |   |
| 880    | N   | N   | . CYS CYS CYS A A 118 118 . | 0.1146 | 0.0904 | 0.1051 | -0.0233 | 0.0099  | - |
| 0.0021 | 1   | .   |                             |        |        |        |         |         |   |
| 881    | CA  | CA  | . CYS CYS CYS A A 118 118 . | 0.1024 | 0.0935 | 0.1014 | -0.0092 | 0.0059  |   |
| 0.0000 | 1   | .   |                             |        |        |        |         |         |   |
| 882    | CB  | CB  | . CYS CYS CYS A A 118 118 . | 0.1233 | 0.1017 | 0.0919 | -0.0349 | -0.0019 | - |
| 0.0120 | 1   | .   |                             |        |        |        |         |         |   |
| 883    | SG  | SG  | . CYS CYS CYS A A 118 118 . | 0.1341 | 0.1305 | 0.1239 | 0.0032  | 0.0152  | - |
| 0.0020 | 1   | .   |                             |        |        |        |         |         |   |
| 884    | C   | C   | . CYS CYS CYS A A 118 118 . | 0.1084 | 0.1048 | 0.1012 | -0.0087 | 0.0010  | - |
| 0.0135 | 1   | .   |                             |        |        |        |         |         |   |
| 885    | O   | O   | . CYS CYS CYS A A 118 118 . | 0.1146 | 0.1038 | 0.1240 | 0.0028  | 0.0251  |   |
| 0.0027 | 1   | .   |                             |        |        |        |         |         |   |
| 886    | N   | N   | . LYS LYS LYS A A 119 119 . | 0.1017 | 0.0989 | 0.1045 | -0.0214 | -0.0035 |   |
| 0.0058 | 1   | .   |                             |        |        |        |         |         |   |
| 887    | CA  | CA  | . LYS LYS LYS A A 119 119 . | 0.0891 | 0.1267 | 0.1176 | -0.0066 | -0.0029 |   |
| 0.0189 | 1   | .   |                             |        |        |        |         |         |   |
| 888    | CB  | CB  | . LYS LYS LYS A A 119 119 . | 0.1021 | 0.1367 | 0.1240 | -0.0132 | 0.0035  |   |
| 0.0033 | 1   | .   |                             |        |        |        |         |         |   |
| 889    | CG  | CG  | . LYS LYS LYS A A 119 119 . | 0.1075 | 0.1697 | 0.1361 | -0.0120 | -0.0014 | - |
| 0.0019 | 1   | .   |                             |        |        |        |         |         |   |
| 890    | CD  | CD  | . LYS LYS LYS A A 119 119 . | 0.1097 | 0.1352 | 0.1078 | -0.0067 | 0.0302  |   |
| 0.0062 | 1   | .   |                             |        |        |        |         |         |   |
| 891    | CE  | CE  | . LYS LYS LYS A A 119 119 . | 0.1637 | 0.2089 | 0.1441 | -0.0427 | 0.0583  |   |
| 0.0131 | 1   | .   |                             |        |        |        |         |         |   |
| 892    | NZ  | NZ  | . LYS LYS LYS A A 119 119 . | 0.1926 | 0.1514 | 0.1614 | -0.0453 | 0.0611  | - |
| 0.0061 | 1   | .   |                             |        |        |        |         |         |   |

|        |     |     |                   |         |                                        |   |
|--------|-----|-----|-------------------|---------|----------------------------------------|---|
| 893    | C   | C   | . LYS LYS LYS A A | 119 119 | . 0.1178 0.1022 0.1187 -0.0185 0.0030  | - |
| 0.0201 | 1   | .   |                   |         |                                        |   |
| 894    | O   | O   | . LYS LYS LYS A A | 119 119 | . 0.1276 0.1285 0.1293 -0.0095 0.0067  | - |
| 0.0167 | 1   | .   |                   |         |                                        |   |
| 895    | N   | N   | . ALA ALA ALA A A | 120 120 | . 0.1024 0.0964 0.1030 -0.0322 0.0007  | - |
| 0.0241 | 1   | .   |                   |         |                                        |   |
| 896    | CA  | CA  | . ALA ALA ALA A A | 120 120 | . 0.1170 0.1281 0.1222 -0.0093 0.0137  | - |
| 0.0205 | 1   | .   |                   |         |                                        |   |
| 897    | CB  | CB  | . ALA ALA ALA A A | 120 120 | . 0.1254 0.0981 0.1281 -0.0150 0.0126  | - |
| 0.0386 | 1   | .   |                   |         |                                        |   |
| 898    | C   | C   | . ALA ALA ALA A A | 120 120 | . 0.1120 0.1191 0.1433 -0.0166 0.0128  | - |
| 0.0063 | 1   | .   |                   |         |                                        |   |
| 899    | O   | O   | . ALA ALA ALA A A | 120 120 | . 0.1004 0.1387 0.1578 -0.0209 0.0257  | - |
| 0.0165 | 1   | .   |                   |         |                                        |   |
| 900    | N   | N   | . GLY GLY GLY A A | 121 121 | . 0.1220 0.1192 0.1105 -0.0118 0.0301  | - |
| 0.0147 | 1   | .   |                   |         |                                        |   |
| 901    | CA  | CA  | . GLY GLY GLY A A | 121 121 | . 0.1458 0.1216 0.1113 -0.0006 0.0306  | - |
| 0.0035 | 1   | .   |                   |         |                                        |   |
| 902    | C   | C   | . GLY GLY GLY A A | 121 121 | . 0.1528 0.1178 0.1312 -0.0127 0.0430  | - |
| 0.0008 | 1   | .   |                   |         |                                        |   |
| 903    | O   | O   | . GLY GLY GLY A A | 121 121 | . 0.1498 0.1459 0.1484 -0.0286 0.0267  | - |
| 0.0093 | 1   | .   |                   |         |                                        |   |
| 904    | N   | N   | . ALA ALA ALA A A | 122 122 | . 0.1114 0.1063 0.1253 -0.0122 0.0246  | - |
| 0.0096 | 1   | .   |                   |         |                                        |   |
| 905    | CA  | CA  | . ALA ALA ALA A A | 122 122 | . 0.1119 0.1009 0.1420 -0.0108 0.0281  | - |
| 0.0118 | 1   | .   |                   |         |                                        |   |
| 906    | CB  | CB  | . ALA ALA ALA A A | 122 122 | . 0.1273 0.0987 0.1431 -0.0316 0.0073  | - |
| 0.0280 | 1   | .   |                   |         |                                        |   |
| 907    | C   | C   | . ALA ALA ALA A A | 122 122 | . 0.1193 0.1365 0.1271 0.0115 0.0235   | - |
| 0.0132 | 1   | .   |                   |         |                                        |   |
| 908    | O   | O   | . ALA ALA ALA A A | 122 122 | . 0.1058 0.1357 0.1742 -0.0008 0.0458  | - |
| 0.0322 | 1   | .   |                   |         |                                        |   |
| 909    | N   | N   | . ALA ALA ALA A A | 123 123 | . 0.1052 0.1323 0.1228 -0.0108 -0.0124 | - |
| 0.0027 | 1   | .   |                   |         |                                        |   |
| 910    | CA  | CA  | . ALA ALA ALA A A | 123 123 | . 0.0964 0.1497 0.1322 -0.0097 -0.0033 | - |
| 0.0093 | 1   | .   |                   |         |                                        |   |
| 911    | CB  | CB  | . ALA ALA ALA A A | 123 123 | . 0.1140 0.1722 0.1270 -0.0007 0.0051  | - |
| 0.0203 | 1   | .   |                   |         |                                        |   |
| 912    | C   | C   | . ALA ALA ALA A A | 123 123 | . 0.1210 0.1411 0.1688 -0.0063 0.0035  | - |
| 0.0108 | 1   | .   |                   |         |                                        |   |
| 913    | O   | O   | . ALA ALA ALA A A | 123 123 | . 0.1408 0.1647 0.2150 0.0282 -0.0033  | - |
| 0.0505 | 1   | .   |                   |         |                                        |   |
| 914    | N   | N   | . GLU GLU GLU A A | 124 124 | . 0.1223 0.1246 0.1781 -0.0034 0.0213  | - |
| 0.0104 | 1   | .   |                   |         |                                        |   |
| 915    | CA  | CA  | . GLU GLU GLU A A | 124 124 | . 0.1301 0.1447 0.1634 -0.0226 0.0281  | - |
| 0.0160 | 1   | .   |                   |         |                                        |   |
| 916    | CB  | CB  | . GLU GLU GLU A A | 124 124 | . 0.1488 0.1336 0.1894 -0.0284 0.0428  | - |
| 0.0037 | 1   | .   |                   |         |                                        |   |
| 917    | CG  | CG  | . GLU GLU GLU A A | 124 124 | . 0.1672 0.1825 0.2085 -0.0406 0.0588  | - |
| 0.0236 | 1   | .   |                   |         |                                        |   |
| 918    | CD  | CD  | . GLU GLU GLU A A | 124 124 | . 0.2636 0.2804 0.2245 -0.0958 0.0171  | - |
| 0.0107 | 1   | .   |                   |         |                                        |   |
| 919    | OE1 | OE1 | . GLU GLU GLU A A | 124 124 | . 0.2572 0.2499 0.3056 -0.1001 0.0301  | - |
| 0.0143 | 1   | .   |                   |         |                                        |   |
| 920    | OE2 | OE2 | . GLU GLU GLU A A | 124 124 | . 0.2732 0.4171 0.4026 -0.0867 0.0464  | - |
| 0.0015 | 1   | .   |                   |         |                                        |   |
| 921    | C   | C   | . GLU GLU GLU A A | 124 124 | . 0.1560 0.1711 0.1855 -0.0489 0.0391  | - |
| 0.0204 | 1   | .   |                   |         |                                        |   |
| 922    | O   | O   | . GLU GLU GLU A A | 124 124 | . 0.1327 0.2062 0.2331 -0.0460 0.0345  | - |
| 0.0479 | 1   | .   |                   |         |                                        |   |

|        |     |     |                             |        |        |        |         |         |   |
|--------|-----|-----|-----------------------------|--------|--------|--------|---------|---------|---|
| 923    | N   | N   | . ARG ARG ARG A A 125 125 . | 0.1407 | 0.1924 | 0.1733 | -0.0513 | 0.0261  | - |
| 0.0342 | 1   | .   |                             |        |        |        |         |         |   |
| 924    | CA  | CA  | . ARG ARG ARG A A 125 125 . | 0.1746 | 0.1980 | 0.1885 | -0.0392 | 0.0173  | - |
| 0.0165 | 1   | .   |                             |        |        |        |         |         |   |
| 925    | CB  | CB  | . ARG ARG ARG A A 125 125 . | 0.1920 | 0.2147 | 0.2267 | -0.0412 | 0.0172  | - |
| 0.0158 | 1   | .   |                             |        |        |        |         |         |   |
| 926    | CG  | CG  | . ARG ARG ARG A A 125 125 . | 0.2220 | 0.2465 | 0.2503 | -0.0026 | 0.0079  | - |
| 0.0149 | 1   | .   |                             |        |        |        |         |         |   |
| 927    | CD  | CD  | . ARG ARG ARG A A 125 125 . | 0.3876 | 0.2894 | 0.3755 | 0.0130  | -0.2037 | - |
| 0.0582 | 1   | .   |                             |        |        |        |         |         |   |
| 928    | NE  | NE  | . ARG ARG ARG A A 125 125 . | 0.5488 | 0.6179 | 0.6686 | 0.0947  | -0.0910 | - |
| 0.0366 | 1   | .   |                             |        |        |        |         |         |   |
| 929    | CZ  | CZ  | . ARG ARG ARG A A 125 125 . | 0.6666 | 0.6554 | 0.7848 | 0.0605  | -0.0680 | - |
| 0.0011 | 1   | .   |                             |        |        |        |         |         |   |
| 930    | NH1 | NH1 | . ARG ARG ARG A A 125 125 . | 0.6551 | 0.7483 | 0.8494 | 0.0664  | -0.0655 | - |
| 0.0024 | 1   | .   |                             |        |        |        |         |         |   |
| 931    | NH2 | NH2 | . ARG ARG ARG A A 125 125 . | 0.6818 | 0.7261 | 0.8470 | 0.0261  | -0.0515 | - |
| 0.0456 | 1   | .   |                             |        |        |        |         |         |   |
| 932    | C   | C   | . ARG ARG ARG A A 125 125 . | 0.1532 | 0.2247 | 0.2187 | -0.0264 | 0.0301  | - |
| 0.0318 | 1   | .   |                             |        |        |        |         |         |   |
| 933    | O   | O   | . ARG ARG ARG A A 125 125 . | 0.1869 | 0.2463 | 0.2035 | -0.0145 | 0.0435  | - |
| 0.0608 | 1   | .   |                             |        |        |        |         |         |   |
| 934    | N   | N   | . GLU GLU GLU A A 126 126 . | 0.1488 | 0.2147 | 0.2338 | -0.0197 | 0.0048  | - |
| 0.0518 | 1   | .   |                             |        |        |        |         |         |   |
| 935    | CA  | CA  | . GLU GLU GLU A A 126 126 . | 0.1553 | 0.2490 | 0.2721 | -0.0118 | 0.0208  | - |
| 0.0463 | 1   | .   |                             |        |        |        |         |         |   |
| 936    | CB  | CB  | . GLU GLU GLU A A 126 126 . | 0.1611 | 0.2691 | 0.3348 | -0.0232 | 0.0012  | - |
| 0.0720 | 1   | .   |                             |        |        |        |         |         |   |
| 937    | CG  | CG  | . GLU GLU GLU A A 126 126 . | 0.2825 | 0.3218 | 0.3936 | -0.0216 | 0.0007  | - |
| 0.0834 | 1   | .   |                             |        |        |        |         |         |   |
| 938    | CD  | CD  | . GLU GLU GLU A A 126 126 . | 0.3779 | 0.4119 | 0.3930 | -0.0297 | -0.0031 | - |
| 0.0783 | 1   | .   |                             |        |        |        |         |         |   |
| 939    | OE1 | OE1 | . GLU GLU GLU A A 126 126 . | 0.3990 | 0.4310 | 0.5012 | -0.0764 | 0.0270  | - |
| 0.1242 | 1   | .   |                             |        |        |        |         |         |   |
| 940    | OE2 | OE2 | . GLU GLU GLU A A 126 126 . | 0.4085 | 0.3842 | 0.4046 | -0.0660 | 0.0041  | - |
| 0.1074 | 1   | .   |                             |        |        |        |         |         |   |
| 941    | C   | C   | . GLU GLU GLU A A 126 126 . | 0.1578 | 0.2105 | 0.2516 | 0.0012  | 0.0190  | - |
| 0.0450 | 1   | .   |                             |        |        |        |         |         |   |
| 942    | O   | O   | . GLU GLU GLU A A 126 126 . | 0.1488 | 0.2098 | 0.2599 | 0.0105  | 0.0237  | - |
| 0.0548 | 1   | .   |                             |        |        |        |         |         |   |
| 943    | N   | N   | . LEU LEU LEU A A 127 127 . | 0.1221 | 0.2200 | 0.2092 | -0.0215 | 0.0217  | - |
| 0.0217 | 1   | .   |                             |        |        |        |         |         |   |
| 944    | CA  | CA  | . LEU LEU LEU A A 127 127 . | 0.1421 | 0.1581 | 0.1660 | -0.0203 | 0.0123  | - |
| 0.0066 | 1   | .   |                             |        |        |        |         |         |   |
| 945    | CB  | CB  | . LEU LEU LEU A A 127 127 . | 0.1396 | 0.1713 | 0.1868 | -0.0169 | 0.0329  | - |
| 0.0159 | 1   | .   |                             |        |        |        |         |         |   |
| 946    | CG  | CG  | . LEU LEU LEU A A 127 127 . | 0.1830 | 0.1897 | 0.1723 | -0.0130 | 0.0588  | - |
| 0.0206 | 1   | .   |                             |        |        |        |         |         |   |
| 947    | CD1 | CD1 | . LEU LEU LEU A A 127 127 . | 0.2539 | 0.1809 | 0.2125 | -0.0439 | 0.0589  | - |
| 0.0555 | 1   | .   |                             |        |        |        |         |         |   |
| 948    | CD2 | CD2 | . LEU LEU LEU A A 127 127 . | 0.2538 | 0.1838 | 0.2000 | -0.0170 | 0.0646  | - |
| 0.0092 | 1   | .   |                             |        |        |        |         |         |   |
| 949    | C   | C   | . LEU LEU LEU A A 127 127 . | 0.1475 | 0.1571 | 0.1522 | -0.0031 | 0.0114  | - |
| 0.0093 | 1   | .   |                             |        |        |        |         |         |   |
| 950    | O   | O   | . LEU LEU LEU A A 127 127 . | 0.1228 | 0.1680 | 0.1662 | 0.0014  | 0.0219  | - |
| 0.0240 | 1   | .   |                             |        |        |        |         |         |   |
| 951    | N   | N   | . PRO PRO PRO A A 128 128 . | 0.1223 | 0.1524 | 0.1417 | -0.0092 | 0.0245  | - |
| 0.0194 | 1   | .   |                             |        |        |        |         |         |   |
| 952    | CA  | CA  | . PRO PRO PRO A A 128 128 . | 0.1152 | 0.1437 | 0.1790 | -0.0132 | 0.0146  | - |
| 0.0109 | 1   | .   |                             |        |        |        |         |         |   |









|        |     |     |                             |        |        |        |         |         |   |
|--------|-----|-----|-----------------------------|--------|--------|--------|---------|---------|---|
| 1043   | ND2 | ND2 | . ASN ASN ASN A A 139 139 . | 0.2651 | 0.3597 | 0.2032 | -0.0696 | -0.0017 |   |
| 0.0117 | 1   | .   |                             |        |        |        |         |         |   |
| 1044   | C   | C   | . ASN ASN ASN A A 139 139 . | 0.3746 | 0.4297 | 0.3507 | 0.0047  | 0.0161  |   |
| 0.0023 | 1   | .   |                             |        |        |        |         |         |   |
| 1045   | O   | O   | . ASN ASN ASN A A 139 139 . | 0.3568 | 0.4385 | 0.3180 | 0.0294  | 0.0384  | - |
| 0.0202 | 1   | .   |                             |        |        |        |         |         |   |
| 1046   | N   | N   | . SER SER SER A A 140 140 . | 0.4329 | 0.4551 | 0.3954 | 0.0053  | 0.0157  | - |
| 0.0057 | 1   | .   |                             |        |        |        |         |         |   |
| 1047   | CA  | CA  | . SER SER SER A A 140 140 . | 0.4712 | 0.4869 | 0.4464 | 0.0047  | 0.0126  |   |
| 0.0080 | 1   | .   |                             |        |        |        |         |         |   |
| 1048   | CB  | CB  | . SER SER SER A A 140 140 . | 0.4725 | 0.4922 | 0.4642 | -0.0047 | 0.0256  |   |
| 0.0089 | 1   | .   |                             |        |        |        |         |         |   |
| 1049   | OG  | OG  | . SER SER SER A A 140 140 . | 0.5100 | 0.5323 | 0.5116 | -0.0168 | 0.0364  |   |
| 0.0423 | 1   | .   |                             |        |        |        |         |         |   |
| 1050   | C   | C   | . SER SER SER A A 140 140 . | 0.4957 | 0.4964 | 0.4629 | 0.0031  | 0.0047  |   |
| 0.0105 | 1   | .   |                             |        |        |        |         |         |   |
| 1051   | O   | O   | . SER SER SER A A 140 140 . | 0.5229 | 0.5253 | 0.4949 | 0.0131  | 0.0022  |   |
| 0.0293 | 1   | .   |                             |        |        |        |         |         |   |
| 1052   | N   | N   | . ASP ASP ASP A A 141 141 . | 0.4854 | 0.4956 | 0.4877 | -0.0008 | 0.0069  |   |
| 0.0153 | 1   | .   |                             |        |        |        |         |         |   |
| 1053   | CA  | CA  | . ASP ASP ASP A A 141 141 . | 0.4694 | 0.4886 | 0.4898 | -0.0044 | 0.0136  |   |
| 0.0071 | 1   | .   |                             |        |        |        |         |         |   |
| 1054   | CB  | CB  | . ASP ASP ASP A A 141 141 . | 0.4933 | 0.5128 | 0.5120 | -0.0005 | 0.0139  | - |
| 0.0055 | 1   | .   |                             |        |        |        |         |         |   |
| 1055   | CG  | CG  | . ASP ASP ASP A A 141 141 . | 0.5606 | 0.5595 | 0.6061 | 0.0346  | 0.0151  |   |
| 0.0031 | 1   | .   |                             |        |        |        |         |         |   |
| 1056   | OD1 | OD1 | . ASP ASP ASP A A 141 141 . | 0.6090 | 0.6828 | 0.7084 | 0.0565  | 0.0478  | - |
| 0.0124 | 1   | .   |                             |        |        |        |         |         |   |
| 1057   | OD2 | OD2 | . ASP ASP ASP A A 141 141 . | 0.5989 | 0.5961 | 0.6470 | 0.0244  | 0.0239  | - |
| 0.0070 | 1   | .   |                             |        |        |        |         |         |   |
| 1058   | C   | C   | . ASP ASP ASP A A 141 141 . | 0.4264 | 0.4598 | 0.4626 | -0.0034 | 0.0082  |   |
| 0.0095 | 1   | .   |                             |        |        |        |         |         |   |
| 1059   | O   | O   | . ASP ASP ASP A A 141 141 . | 0.4507 | 0.4853 | 0.4962 | -0.0082 | -0.0022 |   |
| 0.0016 | 1   | .   |                             |        |        |        |         |         |   |
| 1060   | N   | N   | . LEU LEU LEU A A 142 142 . | 0.3517 | 0.3958 | 0.3880 | -0.0211 | 0.0247  |   |
| 0.0127 | 1   | .   |                             |        |        |        |         |         |   |
| 1061   | CA  | CA  | . LEU LEU LEU A A 142 142 . | 0.2873 | 0.3093 | 0.3476 | -0.0125 | 0.0232  |   |
| 0.0110 | 1   | .   |                             |        |        |        |         |         |   |
| 1062   | CB  | CB  | . LEU LEU LEU A A 142 142 . | 0.3027 | 0.2769 | 0.3120 | -0.0234 | 0.0606  | - |
| 0.0095 | 1   | .   |                             |        |        |        |         |         |   |
| 1063   | CG  | CG  | . LEU LEU LEU A A 142 142 . | 0.2918 | 0.3077 | 0.3612 | -0.0708 | 0.0205  | - |
| 0.0132 | 1   | .   |                             |        |        |        |         |         |   |
| 1064   | CD1 | CD1 | . LEU LEU LEU A A 142 142 . | 0.2600 | 0.2818 | 0.3020 | -0.0436 | 0.0115  | - |
| 0.0955 | 1   | .   |                             |        |        |        |         |         |   |
| 1065   | CD2 | CD2 | . LEU LEU LEU A A 142 142 . | 0.3084 | 0.2600 | 0.4542 | 0.0005  | 0.0515  | - |
| 0.0250 | 1   | .   |                             |        |        |        |         |         |   |
| 1066   | C   | C   | . LEU LEU LEU A A 142 142 . | 0.2391 | 0.3001 | 0.2994 | -0.0116 | 0.0162  |   |
| 0.0005 | 1   | .   |                             |        |        |        |         |         |   |
| 1067   | O   | O   | . LEU LEU LEU A A 142 142 . | 0.2272 | 0.3060 | 0.2903 | -0.0108 | 0.0460  |   |
| 0.0103 | 1   | .   |                             |        |        |        |         |         |   |
| 1068   | N   | N   | . ILE ILE ILE A A 143 143 . | 0.2214 | 0.2600 | 0.2640 | 0.0046  | 0.0177  |   |
| 0.0269 | 1   | .   |                             |        |        |        |         |         |   |
| 1069   | CA  | CA  | . ILE ILE ILE A A 143 143 . | 0.2004 | 0.2401 | 0.1963 | -0.0085 | 0.0055  |   |
| 0.0238 | 1   | .   |                             |        |        |        |         |         |   |
| 1070   | CB  | CB  | . ILE ILE ILE A A 143 143 . | 0.2612 | 0.3161 | 0.2135 | 0.0201  | 0.0154  |   |
| 0.0355 | 1   | .   |                             |        |        |        |         |         |   |
| 1071   | CG1 | CG1 | . ILE ILE ILE A A 143 143 . | 0.3358 | 0.2840 | 0.2508 | 0.0453  | -0.0032 |   |
| 0.0173 | 1   | .   |                             |        |        |        |         |         |   |
| 1072   | CD  | CD  | . ILE ILE ILE A A 143 143 . | 0.3589 | 0.3373 | 0.2861 | -0.0040 | -0.0341 |   |
| 0.0538 | 1   | .   |                             |        |        |        |         |         |   |



|        |     |     |                             |        |        |        |         |         |   |
|--------|-----|-----|-----------------------------|--------|--------|--------|---------|---------|---|
| 1103   | C   | C   | . PRO PRO PRO A A 147 147 . | 0.1086 | 0.0871 | 0.0753 | -0.0049 | -0.0011 |   |
| 0.0064 | 1   | .   |                             |        |        |        |         |         |   |
| 1104   | O   | O   | . PRO PRO PRO A A 147 147 . | 0.1261 | 0.1123 | 0.1124 | -0.0034 | 0.0038  | - |
| 0.0091 | 1   | .   |                             |        |        |        |         |         |   |
| 1105   | N   | N   | . ALA ALA ALA A A 148 148 . | 0.0832 | 0.1043 | 0.0703 | -0.0036 | 0.0132  | - |
| 0.0050 | 1   | .   |                             |        |        |        |         |         |   |
| 1106   | CA  | CA  | . ALA ALA ALA A A 148 148 . | 0.0657 | 0.0861 | 0.0675 | 0.0000  | -0.0109 |   |
| 0.0009 | 1   | .   |                             |        |        |        |         |         |   |
| 1107   | CB  | CB  | . ALA ALA ALA A A 148 148 . | 0.1111 | 0.0957 | 0.0698 | -0.0008 | -0.0048 |   |
| 0.0374 | 1   | .   |                             |        |        |        |         |         |   |
| 1108   | C   | C   | . ALA ALA ALA A A 148 148 . | 0.0936 | 0.0782 | 0.0900 | -0.0062 | 0.0076  |   |
| 0.0059 | 1   | .   |                             |        |        |        |         |         |   |
| 1109   | O   | O   | . ALA ALA ALA A A 148 148 . | 0.0966 | 0.0796 | 0.0830 | 0.0023  | 0.0103  |   |
| 0.0077 | 1   | .   |                             |        |        |        |         |         |   |
| 1110   | N   | N   | . PHE PHE PHE A A 149 149 . | 0.0737 | 0.1001 | 0.0855 | -0.0115 | -0.0058 |   |
| 0.0068 | 1   | .   |                             |        |        |        |         |         |   |
| 1111   | CA  | CA  | . PHE PHE PHE A A 149 149 . | 0.0738 | 0.0838 | 0.0680 | 0.0007  | -0.0022 |   |
| 0.0134 | 1   | .   |                             |        |        |        |         |         |   |
| 1112   | CB  | CB  | . PHE PHE PHE A A 149 149 . | 0.0665 | 0.0859 | 0.0787 | 0.0007  | -0.0003 |   |
| 0.0057 | 1   | .   |                             |        |        |        |         |         |   |
| 1113   | CG  | CG  | . PHE PHE PHE A A 149 149 . | 0.0571 | 0.0744 | 0.0770 | -0.0042 | -0.0020 | - |
| 0.0011 | 1   | .   |                             |        |        |        |         |         |   |
| 1114   | CD1 | CD1 | . PHE PHE PHE A A 149 149 . | 0.0864 | 0.0716 | 0.0966 | -0.0071 | -0.0066 |   |
| 0.0074 | 1   | .   |                             |        |        |        |         |         |   |
| 1115   | CE1 | CE1 | . PHE PHE PHE A A 149 149 . | 0.1133 | 0.0800 | 0.1250 | 0.0133  | 0.0183  | - |
| 0.0060 | 1   | .   |                             |        |        |        |         |         |   |
| 1116   | CZ  | CZ  | . PHE PHE PHE A A 149 149 . | 0.1098 | 0.0846 | 0.0974 | -0.0144 | -0.0026 |   |
| 0.0075 | 1   | .   |                             |        |        |        |         |         |   |
| 1117   | CE2 | CE2 | . PHE PHE PHE A A 149 149 . | 0.0828 | 0.0948 | 0.0830 | -0.0038 | -0.0135 |   |
| 0.0093 | 1   | .   |                             |        |        |        |         |         |   |
| 1118   | CD2 | CD2 | . PHE PHE PHE A A 149 149 . | 0.0777 | 0.0851 | 0.0799 | 0.0071  | 0.0148  |   |
| 0.0182 | 1   | .   |                             |        |        |        |         |         |   |
| 1119   | C   | C   | . PHE PHE PHE A A 149 149 . | 0.0738 | 0.0852 | 0.0742 | -0.0083 | -0.0027 |   |
| 0.0033 | 1   | .   |                             |        |        |        |         |         |   |
| 1120   | O   | O   | . PHE PHE PHE A A 149 149 . | 0.0834 | 0.0779 | 0.0877 | -0.0144 | -0.0072 | - |
| 0.0037 | 1   | .   |                             |        |        |        |         |         |   |
| 1121   | N   | N   | . ASN ASN ASN A A 150 150 . | 0.0836 | 0.0889 | 0.0871 | 0.0044  | -0.0058 |   |
| 0.0016 | 1   | .   |                             |        |        |        |         |         |   |
| 1122   | CA  | CA  | . ASN ASN ASN A A 150 150 . | 0.0964 | 0.0977 | 0.0875 | 0.0025  | -0.0162 | - |
| 0.0011 | 1   | .   |                             |        |        |        |         |         |   |
| 1123   | CB  | CB  | . ASN ASN ASN A A 150 150 . | 0.0966 | 0.0984 | 0.1249 | 0.0051  | 0.0185  | - |
| 0.0046 | 1   | .   |                             |        |        |        |         |         |   |
| 1124   | CG  | CG  | . ASN ASN ASN A A 150 150 . | 0.0908 | 0.1068 | 0.1021 | 0.0189  | -0.0125 | - |
| 0.0107 | 1   | .   |                             |        |        |        |         |         |   |
| 1125   | OD1 | OD1 | . ASN ASN ASN A A 150 150 . | 0.1623 | 0.1412 | 0.1850 | 0.0288  | -0.0029 | - |
| 0.0368 | 1   | .   |                             |        |        |        |         |         |   |
| 1126   | ND2 | ND2 | . ASN ASN ASN A A 150 150 . | 0.0945 | 0.0969 | 0.0754 | 0.0017  | -0.0040 |   |
| 0.0093 | 1   | .   |                             |        |        |        |         |         |   |
| 1127   | C   | C   | . ASN ASN ASN A A 150 150 . | 0.1135 | 0.1114 | 0.0997 | -0.0072 | -0.0122 | - |
| 0.0021 | 1   | .   |                             |        |        |        |         |         |   |
| 1128   | O   | O   | . ASN ASN ASN A A 150 150 . | 0.1005 | 0.1145 | 0.1098 | 0.0014  | -0.0132 | - |
| 0.0116 | 1   | .   |                             |        |        |        |         |         |   |
| 1129   | N   | N   | . VAL VAL VAL A A 151 151 . | 0.0997 | 0.0710 | 0.0897 | 0.0028  | -0.0112 |   |
| 0.0232 | 1   | .   |                             |        |        |        |         |         |   |
| 1130   | CA  | CA  | . VAL VAL VAL A A 151 151 . | 0.0996 | 0.0774 | 0.0871 | -0.0005 | 0.0079  |   |
| 0.0239 | 1   | .   |                             |        |        |        |         |         |   |
| 1131   | CB  | CB  | . VAL VAL VAL A A 151 151 . | 0.0662 | 0.0974 | 0.0904 | -0.0059 | -0.0151 |   |
| 0.0021 | 1   | .   |                             |        |        |        |         |         |   |
| 1132   | CG1 | CG1 | . VAL VAL VAL A A 151 151 . | 0.0818 | 0.1275 | 0.1397 | -0.0016 | 0.0113  | - |
| 0.0034 | 1   | .   |                             |        |        |        |         |         |   |



|        |     |     |                             |        |        |        |         |         |   |
|--------|-----|-----|-----------------------------|--------|--------|--------|---------|---------|---|
| 1163   | OG  | OG  | . SER SER SER A A 156 156 . | 0.2155 | 0.1537 | 0.2008 | 0.0225  | -0.0497 |   |
| 0.0051 | 1   | .   |                             |        |        |        |         |         |   |
| 1164   | C   | C   | . SER SER SER A A 156 156 . | 0.1446 | 0.1280 | 0.1381 | 0.0228  | -0.0291 | - |
| 0.0056 | 1   | .   |                             |        |        |        |         |         |   |
| 1165   | O   | O   | . SER SER SER A A 156 156 . | 0.1589 | 0.1713 | 0.1987 | 0.0287  | -0.0433 | - |
| 0.0259 | 1   | .   |                             |        |        |        |         |         |   |
| 1166   | N   | N   | . HIS HIS HIS A A 157 157 . | 0.1284 | 0.1332 | 0.1486 | 0.0269  | -0.0196 |   |
| 0.0155 | 1   | .   |                             |        |        |        |         |         |   |
| 1167   | CA  | CA  | . HIS HIS HIS A A 157 157 . | 0.1050 | 0.1363 | 0.1292 | 0.0039  | -0.0019 |   |
| 0.0129 | 1   | .   |                             |        |        |        |         |         |   |
| 1168   | CB  | CB  | . HIS HIS HIS A A 157 157 . | 0.1202 | 0.1236 | 0.0994 | 0.0143  | 0.0045  |   |
| 0.0169 | 1   | .   |                             |        |        |        |         |         |   |
| 1169   | CG  | CG  | . HIS HIS HIS A A 157 157 . | 0.1406 | 0.1275 | 0.1217 | -0.0034 | 0.0316  |   |
| 0.0077 | 1   | .   |                             |        |        |        |         |         |   |
| 1170   | ND1 | ND1 | . HIS HIS HIS A A 157 157 . | 0.1082 | 0.1564 | 0.1196 | -0.0065 | 0.0181  | - |
| 0.0058 | 1   | .   |                             |        |        |        |         |         |   |
| 1171   | CE1 | CE1 | . HIS HIS HIS A A 157 157 . | 0.1297 | 0.1153 | 0.1823 | 0.0054  | -0.0043 |   |
| 0.0008 | 1   | .   |                             |        |        |        |         |         |   |
| 1172   | NE2 | NE2 | . HIS HIS HIS A A 157 157 . | 0.1002 | 0.1293 | 0.1019 | -0.0068 | -0.0069 | - |
| 0.0125 | 1   | .   |                             |        |        |        |         |         |   |
| 1173   | CD2 | CD2 | . HIS HIS HIS A A 157 157 . | 0.1132 | 0.1615 | 0.1458 | 0.0098  | -0.0007 |   |
| 0.0282 | 1   | .   |                             |        |        |        |         |         |   |
| 1174   | C   | C   | . HIS HIS HIS A A 157 157 . | 0.1265 | 0.1239 | 0.1689 | -0.0032 | -0.0048 |   |
| 0.0190 | 1   | .   |                             |        |        |        |         |         |   |
| 1175   | O   | O   | . HIS HIS HIS A A 157 157 . | 0.1107 | 0.1395 | 0.1468 | 0.0110  | -0.0018 |   |
| 0.0294 | 1   | .   |                             |        |        |        |         |         |   |
| 1176   | N   | N   | . ALA ALA ALA A A 158 158 . | 0.1302 | 0.1353 | 0.1430 | -0.0039 | -0.0012 |   |
| 0.0114 | 1   | .   |                             |        |        |        |         |         |   |
| 1177   | CA  | CA  | . ALA ALA ALA A A 158 158 . | 0.1496 | 0.1575 | 0.1549 | -0.0255 | -0.0076 |   |
| 0.0025 | 1   | .   |                             |        |        |        |         |         |   |
| 1178   | CB  | CB  | . ALA ALA ALA A A 158 158 . | 0.1429 | 0.1477 | 0.1611 | -0.0201 | 0.0334  | - |
| 0.0017 | 1   | .   |                             |        |        |        |         |         |   |
| 1179   | C   | C   | . ALA ALA ALA A A 158 158 . | 0.1546 | 0.1698 | 0.1543 | -0.0187 | -0.0079 |   |
| 0.0083 | 1   | .   |                             |        |        |        |         |         |   |
| 1180   | O   | O   | . ALA ALA ALA A A 158 158 . | 0.1823 | 0.1610 | 0.1598 | -0.0017 | -0.0168 |   |
| 0.0268 | 1   | .   |                             |        |        |        |         |         |   |
| 1181   | N   | N   | . GLY GLY GLY A A 159 159 . | 0.1402 | 0.1578 | 0.1296 | -0.0108 | 0.0058  |   |
| 0.0341 | 1   | .   |                             |        |        |        |         |         |   |
| 1182   | CA  | CA  | . GLY GLY GLY A A 159 159 . | 0.1624 | 0.1647 | 0.1528 | -0.0380 | 0.0137  |   |
| 0.0066 | 1   | .   |                             |        |        |        |         |         |   |
| 1183   | C   | C   | . GLY GLY GLY A A 159 159 . | 0.1769 | 0.1753 | 0.1631 | -0.0227 | 0.0184  |   |
| 0.0098 | 1   | .   |                             |        |        |        |         |         |   |
| 1184   | O   | O   | . GLY GLY GLY A A 159 159 . | 0.1667 | 0.1941 | 0.1647 | -0.0022 | 0.0061  |   |
| 0.0103 | 1   | .   |                             |        |        |        |         |         |   |
| 1185   | N   | N   | . ASN ASN ASN A A 160 160 . | 0.1530 | 0.1711 | 0.1504 | -0.0055 | 0.0069  |   |
| 0.0185 | 1   | .   |                             |        |        |        |         |         |   |
| 1186   | CA  | CA  | . ASN ASN ASN A A 160 160 . | 0.1307 | 0.1376 | 0.1402 | 0.0016  | -0.0064 |   |
| 0.0188 | 1   | .   |                             |        |        |        |         |         |   |
| 1187   | CB  | CB  | . ASN ASN ASN A A 160 160 . | 0.1006 | 0.1483 | 0.1115 | -0.0138 | 0.0138  |   |
| 0.0112 | 1   | .   |                             |        |        |        |         |         |   |
| 1188   | CG  | CG  | . ASN ASN ASN A A 160 160 . | 0.1192 | 0.1063 | 0.1155 | -0.0049 | 0.0082  | - |
| 0.0012 | 1   | .   |                             |        |        |        |         |         |   |
| 1189   | OD1 | OD1 | . ASN ASN ASN A A 160 160 . | 0.1401 | 0.1510 | 0.1307 | -0.0054 | 0.0149  |   |
| 0.0238 | 1   | .   |                             |        |        |        |         |         |   |
| 1190   | ND2 | ND2 | . ASN ASN ASN A A 160 160 . | 0.0997 | 0.1318 | 0.1330 | 0.0031  | 0.0066  | - |
| 0.0094 | 1   | .   |                             |        |        |        |         |         |   |
| 1191   | C   | C   | . ASN ASN ASN A A 160 160 . | 0.1303 | 0.1369 | 0.1434 | 0.0066  | 0.0018  |   |
| 0.0113 | 1   | .   |                             |        |        |        |         |         |   |
| 1192   | O   | O   | . ASN ASN ASN A A 160 160 . | 0.1270 | 0.1464 | 0.1365 | -0.0125 | 0.0030  |   |
| 0.0186 | 1   | .   |                             |        |        |        |         |         |   |

|        |     |     |                             |        |        |        |         |         |   |
|--------|-----|-----|-----------------------------|--------|--------|--------|---------|---------|---|
| 1193   | N   | N   | . LYS LYS LYS A A 161 161 . | 0.1540 | 0.1820 | 0.1445 | -0.0089 | 0.0260  |   |
| 0.0148 | 1   | .   |                             |        |        |        |         |         |   |
| 1194   | CA  | CA  | . LYS LYS LYS A A 161 161 . | 0.1181 | 0.1799 | 0.1267 | -0.0056 | 0.0035  |   |
| 0.0051 | 1   | .   |                             |        |        |        |         |         |   |
| 1195   | CB  | CB  | . LYS LYS LYS A A 161 161 . | 0.1475 | 0.1917 | 0.1471 | -0.0323 | 0.0317  |   |
| 0.0051 | 1   | .   |                             |        |        |        |         |         |   |
| 1196   | CG  | CG  | . LYS LYS LYS A A 161 161 . | 0.1421 | 0.2160 | 0.1804 | -0.0390 | 0.0287  |   |
| 0.0332 | 1   | .   |                             |        |        |        |         |         |   |
| 1197   | CD  | CD  | . LYS LYS LYS A A 161 161 . | 0.2190 | 0.3416 | 0.1842 | -0.0718 | 0.0008  | - |
| 0.0080 | 1   | .   |                             |        |        |        |         |         |   |
| 1198   | CE  | CE  | . LYS LYS LYS A A 161 161 . | 0.3190 | 0.4100 | 0.2050 | -0.1172 | 0.0231  |   |
| 0.0558 | 1   | .   |                             |        |        |        |         |         |   |
| 1199   | NZ  | NZ  | . LYS LYS LYS A A 161 161 . | 0.3028 | 0.4015 | 0.4016 | -0.0960 | -0.0162 |   |
| 0.0175 | 1   | .   |                             |        |        |        |         |         |   |
| 1200   | C   | C   | . LYS LYS LYS A A 161 161 . | 0.1475 | 0.1554 | 0.1581 | -0.0011 | 0.0053  |   |
| 0.0071 | 1   | .   |                             |        |        |        |         |         |   |
| 1201   | O   | O   | . LYS LYS LYS A A 161 161 . | 0.1566 | 0.1870 | 0.1803 | 0.0199  | 0.0251  |   |
| 0.0511 | 1   | .   |                             |        |        |        |         |         |   |
| 1202   | N   | N   | . LEU LEU LEU A A 162 162 . | 0.1086 | 0.1389 | 0.1156 | 0.0028  | -0.0045 |   |
| 0.0083 | 1   | .   |                             |        |        |        |         |         |   |
| 1203   | CA  | CA  | . LEU LEU LEU A A 162 162 . | 0.0931 | 0.1326 | 0.1251 | 0.0113  | -0.0079 |   |
| 0.0233 | 1   | .   |                             |        |        |        |         |         |   |
| 1204   | CB  | CB  | . LEU LEU LEU A A 162 162 . | 0.1093 | 0.1475 | 0.1396 | 0.0185  | -0.0078 |   |
| 0.0231 | 1   | .   |                             |        |        |        |         |         |   |
| 1205   | CG  | CG  | . LEU LEU LEU A A 162 162 . | 0.1206 | 0.1341 | 0.1106 | 0.0185  | 0.0034  |   |
| 0.0089 | 1   | .   |                             |        |        |        |         |         |   |
| 1206   | CD1 | CD1 | . LEU LEU LEU A A 162 162 . | 0.1276 | 0.1578 | 0.1714 | 0.0023  | 0.0105  | - |
| 0.0156 | 1   | .   |                             |        |        |        |         |         |   |
| 1207   | CD2 | CD2 | . LEU LEU LEU A A 162 162 . | 0.0561 | 0.1352 | 0.1563 | -0.0034 | 0.0121  |   |
| 0.0101 | 1   | .   |                             |        |        |        |         |         |   |
| 1208   | C   | C   | . LEU LEU LEU A A 162 162 . | 0.0987 | 0.1309 | 0.1229 | 0.0016  | -0.0045 |   |
| 0.0136 | 1   | .   |                             |        |        |        |         |         |   |
| 1209   | O   | O   | . LEU LEU LEU A A 162 162 . | 0.1254 | 0.1203 | 0.1124 | -0.0003 | -0.0046 |   |
| 0.0094 | 1   | .   |                             |        |        |        |         |         |   |
| 1210   | N   | N   | . ALA ALA ALA A A 163 163 . | 0.1180 | 0.1391 | 0.1372 | 0.0122  | 0.0099  |   |
| 0.0316 | 1   | .   |                             |        |        |        |         |         |   |
| 1211   | CA  | CA  | . ALA ALA ALA A A 163 163 . | 0.1160 | 0.1498 | 0.1482 | 0.0203  | 0.0180  |   |
| 0.0220 | 1   | .   |                             |        |        |        |         |         |   |
| 1212   | CB  | CB  | . ALA ALA ALA A A 163 163 . | 0.1045 | 0.1305 | 0.1572 | -0.0094 | -0.0188 |   |
| 0.0205 | 1   | .   |                             |        |        |        |         |         |   |
| 1213   | C   | C   | . ALA ALA ALA A A 163 163 . | 0.0805 | 0.1170 | 0.1259 | -0.0051 | 0.0016  |   |
| 0.0105 | 1   | .   |                             |        |        |        |         |         |   |
| 1214   | O   | O   | . ALA ALA ALA A A 163 163 . | 0.1197 | 0.1201 | 0.1253 | 0.0145  | 0.0030  | - |
| 0.0009 | 1   | .   |                             |        |        |        |         |         |   |
| 1215   | N   | N   | . MET MET MET A A 164 164 . | 0.1009 | 0.1081 | 0.1085 | -0.0076 | 0.0035  |   |
| 0.0209 | 1   | .   |                             |        |        |        |         |         |   |
| 1216   | CA  | CA  | . MET MET MET A A 164 164 . | 0.0849 | 0.1291 | 0.0967 | -0.0002 | 0.0141  |   |
| 0.0060 | 1   | .   |                             |        |        |        |         |         |   |
| 1217   | CB  | CB  | . MET MET MET A A 164 164 . | 0.0952 | 0.1337 | 0.1241 | -0.0119 | 0.0024  |   |
| 0.0079 | 1   | .   |                             |        |        |        |         |         |   |
| 1218   | CG  | CG  | . MET MET MET A A 164 164 . | 0.0868 | 0.1267 | 0.1237 | -0.0138 | -0.0079 | - |
| 0.0056 | 1   | .   |                             |        |        |        |         |         |   |
| 1219   | SD  | SD  | . MET MET MET A A 164 164 . | 0.1129 | 0.1500 | 0.1360 | 0.0019  | -0.0036 |   |
| 0.0107 | 1   | .   |                             |        |        |        |         |         |   |
| 1220   | CE  | CE  | . MET MET MET A A 164 164 . | 0.0961 | 0.1712 | 0.1367 | 0.0421  | -0.0377 | - |
| 0.0201 | 1   | .   |                             |        |        |        |         |         |   |
| 1221   | C   | C   | . MET MET MET A A 164 164 . | 0.0876 | 0.1095 | 0.1210 | -0.0079 | 0.0169  |   |
| 0.0068 | 1   | .   |                             |        |        |        |         |         |   |
| 1222   | O   | O   | . MET MET MET A A 164 164 . | 0.1212 | 0.1203 | 0.1173 | -0.0002 | 0.0046  |   |
| 0.0270 | 1   | .   |                             |        |        |        |         |         |   |



|        |     |     |                             |        |        |        |         |         |   |
|--------|-----|-----|-----------------------------|--------|--------|--------|---------|---------|---|
| 1223   | N   | N   | . GLN GLN GLN A A 165 165 . | 0.0818 | 0.1087 | 0.1017 | -0.0192 | -0.0062 | - |
| 0.0134 | 1   | .   |                             |        |        |        |         |         |   |
| 1224   | CA  | CA  | . GLN GLN GLN A A 165 165 . | 0.0995 | 0.0772 | 0.0812 | -0.0047 | -0.0128 |   |
| 0.0016 | 1   | .   |                             |        |        |        |         |         |   |
| 1225   | CB  | CB  | . GLN GLN GLN A A 165 165 . | 0.1049 | 0.0894 | 0.0839 | -0.0175 | -0.0015 | - |
| 0.0175 | 1   | .   |                             |        |        |        |         |         |   |
| 1226   | CG  | CG  | . GLN GLN GLN A A 165 165 . | 0.0874 | 0.0972 | 0.0777 | -0.0090 | -0.0169 |   |
| 0.0135 | 1   | .   |                             |        |        |        |         |         |   |
| 1227   | CD  | CD  | . GLN GLN GLN A A 165 165 . | 0.1173 | 0.1068 | 0.0997 | -0.0024 | -0.0145 |   |
| 0.0004 | 1   | .   |                             |        |        |        |         |         |   |
| 1228   | OE1 | OE1 | . GLN GLN GLN A A 165 165 . | 0.1117 | 0.0970 | 0.0986 | 0.0157  | 0.0070  |   |
| 0.0004 | 1   | .   |                             |        |        |        |         |         |   |
| 1229   | NE2 | NE2 | . GLN GLN GLN A A 165 165 . | 0.1063 | 0.1460 | 0.1225 | -0.0127 | -0.0008 | - |
| 0.0123 | 1   | .   |                             |        |        |        |         |         |   |
| 1230   | C   | C   | . GLN GLN GLN A A 165 165 . | 0.0908 | 0.1173 | 0.0888 | -0.0056 | 0.0045  | - |
| 0.0037 | 1   | .   |                             |        |        |        |         |         |   |
| 1231   | O   | O   | . GLN GLN GLN A A 165 165 . | 0.0878 | 0.0984 | 0.0890 | 0.0192  | 0.0132  |   |
| 0.0091 | 1   | .   |                             |        |        |        |         |         |   |
| 1232   | N   | N   | . GLU GLU GLU A A 166 166 . | 0.0920 | 0.1080 | 0.1001 | 0.0041  | 0.0269  |   |
| 0.0015 | 1   | .   |                             |        |        |        |         |         |   |
| 1233   | CA  | CA  | . GLU GLU GLU A A 166 166 . | 0.0829 | 0.0941 | 0.0931 | 0.0052  | -0.0101 | - |
| 0.0003 | 1   | .   |                             |        |        |        |         |         |   |
| 1234   | CB  | CB  | . GLU GLU GLU A A 166 166 . | 0.1055 | 0.1079 | 0.0942 | -0.0095 | -0.0029 | - |
| 0.0046 | 1   | .   |                             |        |        |        |         |         |   |
| 1235   | CG  | CG  | . GLU GLU GLU A A 166 166 . | 0.1014 | 0.1134 | 0.1332 | -0.0253 | -0.0181 | - |
| 0.0199 | 1   | .   |                             |        |        |        |         |         |   |
| 1236   | CD  | CD  | . GLU GLU GLU A A 166 166 . | 0.0894 | 0.1392 | 0.1314 | 0.0014  | 0.0071  | - |
| 0.0019 | 1   | .   |                             |        |        |        |         |         |   |
| 1237   | OE1 | OE1 | . GLU GLU GLU A A 166 166 . | 0.0982 | 0.1277 | 0.1239 | 0.0065  | 0.0108  |   |
| 0.0057 | 1   | .   |                             |        |        |        |         |         |   |
| 1238   | OE2 | OE2 | . GLU GLU GLU A A 166 166 . | 0.1093 | 0.1395 | 0.1591 | -0.0025 | 0.0030  | - |
| 0.0129 | 1   | .   |                             |        |        |        |         |         |   |
| 1239   | C   | C   | . GLU GLU GLU A A 166 166 . | 0.0887 | 0.0849 | 0.0871 | 0.0023  | -0.0025 | - |
| 0.0010 | 1   | .   |                             |        |        |        |         |         |   |
| 1240   | O   | O   | . GLU GLU GLU A A 166 166 . | 0.1042 | 0.1233 | 0.1111 | 0.0026  | -0.0160 |   |
| 0.0054 | 1   | .   |                             |        |        |        |         |         |   |
| 1241   | N   | N   | . PHE PHE PHE A A 167 167 . | 0.0801 | 0.0773 | 0.0799 | 0.0097  | -0.0009 |   |
| 0.0054 | 1   | .   |                             |        |        |        |         |         |   |
| 1242   | CA  | CA  | . PHE PHE PHE A A 167 167 . | 0.0777 | 0.0964 | 0.0998 | 0.0024  | -0.0072 | - |
| 0.0068 | 1   | .   |                             |        |        |        |         |         |   |
| 1243   | CB  | CB  | . PHE PHE PHE A A 167 167 . | 0.0984 | 0.0989 | 0.1213 | -0.0004 | 0.0125  | - |
| 0.0048 | 1   | .   |                             |        |        |        |         |         |   |
| 1244   | CG  | CG  | . PHE PHE PHE A A 167 167 . | 0.1102 | 0.0930 | 0.0984 | 0.0136  | 0.0072  |   |
| 0.0162 | 1   | .   |                             |        |        |        |         |         |   |
| 1245   | CD1 | CD1 | . PHE PHE PHE A A 167 167 . | 0.1178 | 0.0812 | 0.1300 | 0.0058  | 0.0182  |   |
| 0.0014 | 1   | .   |                             |        |        |        |         |         |   |
| 1246   | CE1 | CE1 | . PHE PHE PHE A A 167 167 . | 0.1161 | 0.1286 | 0.1559 | -0.0235 | 0.0138  |   |
| 0.0158 | 1   | .   |                             |        |        |        |         |         |   |
| 1247   | CZ  | CZ  | . PHE PHE PHE A A 167 167 . | 0.0880 | 0.1500 | 0.1366 | -0.0140 | 0.0043  |   |
| 0.0293 | 1   | .   |                             |        |        |        |         |         |   |
| 1248   | CE2 | CE2 | . PHE PHE PHE A A 167 167 . | 0.1209 | 0.1764 | 0.2154 | 0.0044  | -0.0232 |   |
| 0.0174 | 1   | .   |                             |        |        |        |         |         |   |
| 1249   | CD2 | CD2 | . PHE PHE PHE A A 167 167 . | 0.1233 | 0.1288 | 0.1868 | -0.0283 | 0.0142  |   |
| 0.0217 | 1   | .   |                             |        |        |        |         |         |   |
| 1250   | C   | C   | . PHE PHE PHE A A 167 167 . | 0.0812 | 0.1100 | 0.1022 | 0.0056  | -0.0104 |   |
| 0.0117 | 1   | .   |                             |        |        |        |         |         |   |
| 1251   | O   | O   | . PHE PHE PHE A A 167 167 . | 0.0983 | 0.0975 | 0.0789 | -0.0093 | -0.0061 |   |
| 0.0101 | 1   | .   |                             |        |        |        |         |         |   |
| 1252   | N   | N   | . MET MET MET A A 168 168 . | 0.0798 | 0.1228 | 0.0825 | -0.0014 | -0.0089 | - |
| 0.0132 | 1   | .   |                             |        |        |        |         |         |   |

|        |     |     |                             |        |        |        |         |         |   |
|--------|-----|-----|-----------------------------|--------|--------|--------|---------|---------|---|
| 1253   | CA  | CA  | . MET MET MET A A 168 168 . | 0.0704 | 0.0990 | 0.1108 | -0.0228 | 0.0099  | - |
| 0.0021 | 1   | .   |                             |        |        |        |         |         |   |
| 1254   | CB  | CB  | . MET MET MET A A 168 168 . | 0.1108 | 0.1099 | 0.1122 | -0.0084 | 0.0108  | - |
| 0.0054 | 1   | .   |                             |        |        |        |         |         |   |
| 1255   | CG  | CG  | . MET MET MET A A 168 168 . | 0.1080 | 0.0887 | 0.1007 | -0.0053 | 0.0038  |   |
| 0.0072 | 1   | .   |                             |        |        |        |         |         |   |
| 1256   | SD  | SD  | . MET MET MET A A 168 168 . | 0.1224 | 0.1298 | 0.1331 | 0.0003  | -0.0101 |   |
| 0.0053 | 1   | .   |                             |        |        |        |         |         |   |
| 1257   | CE  | CE  | . MET MET MET A A 168 168 . | 0.0623 | 0.1670 | 0.1429 | 0.0279  | -0.0128 |   |
| 0.0000 | 1   | .   |                             |        |        |        |         |         |   |
| 1258   | C   | C   | . MET MET MET A A 168 168 . | 0.0752 | 0.0866 | 0.0744 | -0.0103 | -0.0130 |   |
| 0.0001 | 1   | .   |                             |        |        |        |         |         |   |
| 1259   | O   | O   | . MET MET MET A A 168 168 . | 0.1098 | 0.0940 | 0.0829 | 0.0064  | -0.0236 | - |
| 0.0048 | 1   | .   |                             |        |        |        |         |         |   |
| 1260   | N   | N   | . ILE ILE ILE A A 169 169 . | 0.0772 | 0.0875 | 0.0815 | 0.0093  | 0.0140  | - |
| 0.0165 | 1   | .   |                             |        |        |        |         |         |   |
| 1261   | CA  | CA  | . ILE ILE ILE A A 169 169 . | 0.0963 | 0.0826 | 0.0824 | 0.0037  | 0.0030  | - |
| 0.0138 | 1   | .   |                             |        |        |        |         |         |   |
| 1262   | CB  | CB  | . ILE ILE ILE A A 169 169 . | 0.1085 | 0.0775 | 0.0755 | -0.0287 | -0.0206 | - |
| 0.0065 | 1   | .   |                             |        |        |        |         |         |   |
| 1263   | CG1 | CG1 | . ILE ILE ILE A A 169 169 . | 0.0964 | 0.0762 | 0.0913 | -0.0059 | -0.0136 | - |
| 0.0104 | 1   | .   |                             |        |        |        |         |         |   |
| 1264   | CD  | CD  | . ILE ILE ILE A A 169 169 . | 0.1511 | 0.0820 | 0.1458 | -0.0142 | -0.0102 | - |
| 0.0288 | 1   | .   |                             |        |        |        |         |         |   |
| 1265   | CG2 | CG2 | . ILE ILE ILE A A 169 169 . | 0.1162 | 0.1437 | 0.1156 | -0.0236 | 0.0153  | - |
| 0.0287 | 1   | .   |                             |        |        |        |         |         |   |
| 1266   | C   | C   | . ILE ILE ILE A A 169 169 . | 0.0852 | 0.0912 | 0.0750 | -0.0133 | -0.0067 | - |
| 0.0021 | 1   | .   |                             |        |        |        |         |         |   |
| 1267   | O   | O   | . ILE ILE ILE A A 169 169 . | 0.1163 | 0.1087 | 0.0816 | -0.0110 | -0.0106 | - |
| 0.0039 | 1   | .   |                             |        |        |        |         |         |   |
| 1268   | N   | N   | . LEU LEU LEU A A 170 170 . | 0.1115 | 0.1204 | 0.0829 | 0.0019  | 0.0162  | - |
| 0.0064 | 1   | .   |                             |        |        |        |         |         |   |
| 1269   | CA  | CA  | . LEU LEU LEU A A 170 170 . | 0.0920 | 0.0784 | 0.0822 | -0.0018 | -0.0041 | - |
| 0.0018 | 1   | .   |                             |        |        |        |         |         |   |
| 1270   | CB  | CB  | . LEU LEU LEU A A 170 170 . | 0.1093 | 0.0963 | 0.0957 | 0.0058  | -0.0183 | - |
| 0.0045 | 1   | .   |                             |        |        |        |         |         |   |
| 1271   | CG  | CG  | . LEU LEU LEU A A 170 170 . | 0.1084 | 0.1063 | 0.1201 | 0.0165  | 0.0049  | - |
| 0.0193 | 1   | .   |                             |        |        |        |         |         |   |
| 1272   | CD1 | CD1 | . LEU LEU LEU A A 170 170 . | 0.0997 | 0.1601 | 0.1525 | 0.0258  | 0.0223  | - |
| 0.0173 | 1   | .   |                             |        |        |        |         |         |   |
| 1273   | CD2 | CD2 | . LEU LEU LEU A A 170 170 . | 0.1944 | 0.1314 | 0.1600 | 0.0089  | 0.0297  | - |
| 0.0302 | 1   | .   |                             |        |        |        |         |         |   |
| 1274   | C   | C   | . LEU LEU LEU A A 170 170 . | 0.0912 | 0.0896 | 0.0755 | 0.0072  | -0.0042 | - |
| 0.0014 | 1   | .   |                             |        |        |        |         |         |   |
| 1275   | O   | O   | . LEU LEU LEU A A 170 170 . | 0.0958 | 0.0985 | 0.0913 | -0.0060 | -0.0274 | - |
| 0.0038 | 1   | .   |                             |        |        |        |         |         |   |
| 1276   | N   | N   | . PRO PRO PRO A A 171 171 . | 0.1034 | 0.0902 | 0.0833 | 0.0039  | -0.0046 | - |
| 0.0026 | 1   | .   |                             |        |        |        |         |         |   |
| 1277   | CA  | CA  | . PRO PRO PRO A A 171 171 . | 0.1027 | 0.0979 | 0.0781 | 0.0265  | 0.0052  | - |
| 0.0007 | 1   | .   |                             |        |        |        |         |         |   |
| 1278   | CB  | CB  | . PRO PRO PRO A A 171 171 . | 0.1053 | 0.1460 | 0.0808 | 0.0159  | 0.0026  | - |
| 0.0180 | 1   | .   |                             |        |        |        |         |         |   |
| 1279   | CG  | CG  | . PRO PRO PRO A A 171 171 . | 0.1320 | 0.1267 | 0.1183 | 0.0432  | 0.0014  | - |
| 0.0206 | 1   | .   |                             |        |        |        |         |         |   |
| 1280   | CD  | CD  | . PRO PRO PRO A A 171 171 . | 0.1398 | 0.1048 | 0.0637 | 0.0152  | -0.0275 | - |
| 0.0007 | 1   | .   |                             |        |        |        |         |         |   |
| 1281   | C   | C   | . PRO PRO PRO A A 171 171 . | 0.0813 | 0.0860 | 0.0829 | -0.0051 | -0.0041 | - |
| 0.0138 | 1   | .   |                             |        |        |        |         |         |   |
| 1282   | O   | O   | . PRO PRO PRO A A 171 171 . | 0.1144 | 0.1120 | 0.0937 | 0.0066  | -0.0039 | - |
| 0.0105 | 1   | .   |                             |        |        |        |         |         |   |

|        |     |     |                             |        |        |        |         |         |   |
|--------|-----|-----|-----------------------------|--------|--------|--------|---------|---------|---|
| 1283   | N   | N   | . VAL VAL VAL A A 172 172 . | 0.1110 | 0.1091 | 0.0750 | 0.0038  | -0.0052 |   |
| 0.0016 | 1   | .   |                             |        |        |        |         |         |   |
| 1284   | CA  | CA  | . VAL VAL VAL A A 172 172 . | 0.1189 | 0.1126 | 0.0946 | 0.0090  | -0.0004 |   |
| 0.0052 | 1   | .   |                             |        |        |        |         |         |   |
| 1285   | CB  | CB  | . VAL VAL VAL A A 172 172 . | 0.1217 | 0.1105 | 0.0910 | 0.0031  | -0.0120 | - |
| 0.0034 | 1   | .   |                             |        |        |        |         |         |   |
| 1286   | CG1 | CG1 | . VAL VAL VAL A A 172 172 . | 0.1487 | 0.0879 | 0.1206 | 0.0169  | -0.0211 | - |
| 0.0008 | 1   | .   |                             |        |        |        |         |         |   |
| 1287   | CG2 | CG2 | . VAL VAL VAL A A 172 172 . | 0.1120 | 0.1349 | 0.1205 | 0.0031  | -0.0178 | - |
| 0.0028 | 1   | .   |                             |        |        |        |         |         |   |
| 1288   | C   | C   | . VAL VAL VAL A A 172 172 . | 0.1217 | 0.1293 | 0.1051 | -0.0168 | -0.0136 | - |
| 0.0171 | 1   | .   |                             |        |        |        |         |         |   |
| 1289   | O   | O   | . VAL VAL VAL A A 172 172 . | 0.1568 | 0.1546 | 0.1165 | -0.0054 | 0.0072  | - |
| 0.0223 | 1   | .   |                             |        |        |        |         |         |   |
| 1290   | N   | N   | . GLY GLY GLY A A 173 173 . | 0.1356 | 0.1046 | 0.0880 | 0.0267  | -0.0047 | - |
| 0.0241 | 1   | .   |                             |        |        |        |         |         |   |
| 1291   | CA  | CA  | . GLY GLY GLY A A 173 173 . | 0.1256 | 0.1288 | 0.1243 | 0.0441  | -0.0054 | - |
| 0.0383 | 1   | .   |                             |        |        |        |         |         |   |
| 1292   | C   | C   | . GLY GLY GLY A A 173 173 . | 0.1433 | 0.1332 | 0.1281 | 0.0178  | -0.0154 | - |
| 0.0337 | 1   | .   |                             |        |        |        |         |         |   |
| 1293   | O   | O   | . GLY GLY GLY A A 173 173 . | 0.1486 | 0.1619 | 0.1722 | 0.0240  | -0.0182 | - |
| 0.0368 | 1   | .   |                             |        |        |        |         |         |   |
| 1294   | N   | N   | . ALA ALA ALA A A 174 174 . | 0.1325 | 0.1319 | 0.0931 | 0.0077  | 0.0077  | - |
| 0.0219 | 1   | .   |                             |        |        |        |         |         |   |
| 1295   | CA  | CA  | . ALA ALA ALA A A 174 174 . | 0.1353 | 0.1311 | 0.1252 | -0.0126 | -0.0097 | - |
| 0.0114 | 1   | .   |                             |        |        |        |         |         |   |
| 1296   | CB  | CB  | . ALA ALA ALA A A 174 174 . | 0.1450 | 0.1408 | 0.1275 | 0.0048  | -0.0352 | - |
| 0.0338 | 1   | .   |                             |        |        |        |         |         |   |
| 1297   | C   | C   | . ALA ALA ALA A A 174 174 . | 0.1490 | 0.1275 | 0.1108 | -0.0058 | -0.0105 | - |
| 0.0255 | 1   | .   |                             |        |        |        |         |         |   |
| 1298   | O   | O   | . ALA ALA ALA A A 174 174 . | 0.1648 | 0.1430 | 0.1227 | -0.0004 | -0.0134 | - |
| 0.0115 | 1   | .   |                             |        |        |        |         |         |   |
| 1299   | N   | N   | . GLU GLU GLU A A 175 175 . | 0.1550 | 0.1694 | 0.1635 | -0.0040 | -0.0054 | - |
| 0.0360 | 1   | .   |                             |        |        |        |         |         |   |
| 1300   | CA  | CA  | . GLU GLU GLU A A 175 175 . | 0.1323 | 0.1907 | 0.2009 | -0.0136 | 0.0014  | - |
| 0.0217 | 1   | .   |                             |        |        |        |         |         |   |
| 1301   | CB  | CB  | . GLU GLU GLU A A 175 175 . | 0.1695 | 0.1964 | 0.2779 | 0.0070  | 0.0136  | - |
| 0.0545 | 1   | .   |                             |        |        |        |         |         |   |
| 1302   | CG  | CG  | . GLU GLU GLU A A 175 175 . | 0.3128 | 0.3178 | 0.3701 | -0.0177 | 0.0062  | - |
| 0.0192 | 1   | .   |                             |        |        |        |         |         |   |
| 1303   | CD  | CD  | . GLU GLU GLU A A 175 175 . | 0.5002 | 0.5681 | 0.4711 | 0.0159  | 0.0035  | - |
| 0.0313 | 1   | .   |                             |        |        |        |         |         |   |
| 1304   | OE1 | OE1 | . GLU GLU GLU A A 175 175 . | 0.5815 | 0.6205 | 0.5938 | 0.0429  | -0.0607 | - |
| 0.0155 | 1   | .   |                             |        |        |        |         |         |   |
| 1305   | OE2 | OE2 | . GLU GLU GLU A A 175 175 . | 0.5303 | 0.6176 | 0.5967 | 0.0690  | 0.0636  | - |
| 0.0186 | 1   | .   |                             |        |        |        |         |         |   |
| 1306   | C   | C   | . GLU GLU GLU A A 175 175 . | 0.1607 | 0.1937 | 0.1753 | 0.0005  | 0.0090  | - |
| 0.0234 | 1   | .   |                             |        |        |        |         |         |   |
| 1307   | O   | O   | . GLU GLU GLU A A 175 175 . | 0.1643 | 0.2536 | 0.1791 | -0.0460 | 0.0188  | - |
| 0.0231 | 1   | .   |                             |        |        |        |         |         |   |
| 1308   | N   | N   | . SER SER SER A A 176 176 . | 0.1234 | 0.1505 | 0.1087 | -0.0080 | 0.0019  | - |
| 0.0267 | 1   | .   |                             |        |        |        |         |         |   |
| 1309   | CA  | CA  | . SER SER SER A A 176 176 . | 0.1136 | 0.1401 | 0.1252 | 0.0088  | 0.0003  | - |
| 0.0143 | 1   | .   |                             |        |        |        |         |         |   |
| 1310   | CB  | CB  | . SER SER SER A A 176 176 . | 0.1079 | 0.1517 | 0.1186 | 0.0377  | 0.0329  | - |
| 0.0129 | 1   | .   |                             |        |        |        |         |         |   |
| 1311   | OG  | OG  | . SER SER SER A A 176 176 . | 0.1201 | 0.1597 | 0.1195 | 0.0083  | -0.0017 | - |
| 0.0140 | 1   | .   |                             |        |        |        |         |         |   |
| 1312   | C   | C   | . SER SER SER A A 176 176 . | 0.1049 | 0.1227 | 0.1028 | 0.0002  | 0.0079  | - |
| 0.0052 | 1   | .   |                             |        |        |        |         |         |   |

|        |     |     |                             |        |        |        |         |         |   |
|--------|-----|-----|-----------------------------|--------|--------|--------|---------|---------|---|
| 1313   | O   | O   | . SER SER SER A A 176 176 . | 0.1368 | 0.1144 | 0.1064 | 0.0147  | 0.0013  | - |
| 0.0031 | 1   | .   |                             |        |        |        |         |         |   |
| 1314   | N   | N   | . PHE PHE PHE A A 177 177 . | 0.1278 | 0.1201 | 0.1143 | 0.0082  | 0.0001  | - |
| 0.0139 | 1   | .   |                             |        |        |        |         |         |   |
| 1315   | CA  | CA  | . PHE PHE PHE A A 177 177 . | 0.1433 | 0.1013 | 0.1095 | 0.0059  | 0.0050  | - |
| 0.0039 | 1   | .   |                             |        |        |        |         |         |   |
| 1316   | CB  | CB  | . PHE PHE PHE A A 177 177 . | 0.1029 | 0.1070 | 0.1270 | -0.0239 | 0.0044  | - |
| 0.0047 | 1   | .   |                             |        |        |        |         |         |   |
| 1317   | CG  | CG  | . PHE PHE PHE A A 177 177 . | 0.0922 | 0.1009 | 0.1037 | -0.0073 | -0.0014 |   |
| 0.0123 | 1   | .   |                             |        |        |        |         |         |   |
| 1318   | CD1 | CD1 | . PHE PHE PHE A A 177 177 . | 0.1255 | 0.1283 | 0.1427 | -0.0049 | -0.0130 |   |
| 0.0030 | 1   | .   |                             |        |        |        |         |         |   |
| 1319   | CE1 | CE1 | . PHE PHE PHE A A 177 177 . | 0.1108 | 0.1288 | 0.0961 | 0.0112  | -0.0112 | - |
| 0.0140 | 1   | .   |                             |        |        |        |         |         |   |
| 1320   | CZ  | CZ  | . PHE PHE PHE A A 177 177 . | 0.1232 | 0.1048 | 0.0927 | -0.0223 | -0.0201 | - |
| 0.0138 | 1   | .   |                             |        |        |        |         |         |   |
| 1321   | CE2 | CE2 | . PHE PHE PHE A A 177 177 . | 0.1315 | 0.0714 | 0.1135 | 0.0053  | 0.0059  | - |
| 0.0297 | 1   | .   |                             |        |        |        |         |         |   |
| 1322   | CD2 | CD2 | . PHE PHE PHE A A 177 177 . | 0.0931 | 0.0974 | 0.0888 | -0.0038 | 0.0053  |   |
| 0.0146 | 1   | .   |                             |        |        |        |         |         |   |
| 1323   | C   | C   | . PHE PHE PHE A A 177 177 . | 0.1124 | 0.1078 | 0.1131 | -0.0057 | 0.0077  | - |
| 0.0109 | 1   | .   |                             |        |        |        |         |         |   |
| 1324   | O   | O   | . PHE PHE PHE A A 177 177 . | 0.1162 | 0.1014 | 0.1140 | 0.0015  | 0.0044  |   |
| 0.0053 | 1   | .   |                             |        |        |        |         |         |   |
| 1325   | N   | N   | . ARG ARG ARG A A 178 178 . | 0.1460 | 0.1023 | 0.1094 | 0.0056  | -0.0092 | - |
| 0.0024 | 1   | .   |                             |        |        |        |         |         |   |
| 1326   | CA  | CA  | . ARG ARG ARG A A 178 178 . | 0.1195 | 0.1039 | 0.1098 | -0.0008 | -0.0078 |   |
| 0.0069 | 1   | .   |                             |        |        |        |         |         |   |
| 1327   | CB  | CB  | . ARG ARG ARG A A 178 178 . | 0.1378 | 0.1190 | 0.1266 | 0.0123  | -0.0141 |   |
| 0.0356 | 1   | .   |                             |        |        |        |         |         |   |
| 1328   | CG  | CG  | . ARG ARG ARG A A 178 178 . | 0.1824 | 0.2204 | 0.1580 | -0.0029 | 0.0146  |   |
| 0.0377 | 1   | .   |                             |        |        |        |         |         |   |
| 1329   | CD  | CD  | . ARG ARG ARG A A 178 178 . | 0.2127 | 0.3253 | 0.3256 | 0.0047  | -0.0356 |   |
| 0.0416 | 1   | .   |                             |        |        |        |         |         |   |
| 1330   | NE  | NE  | . ARG ARG ARG A A 178 178 . | 0.3926 | 0.3568 | 0.3819 | 0.0296  | -0.0345 |   |
| 0.0671 | 1   | .   |                             |        |        |        |         |         |   |
| 1331   | CZ  | CZ  | . ARG ARG ARG A A 178 178 . | 0.5083 | 0.3384 | 0.3768 | -0.0465 | 0.0069  | - |
| 0.0056 | 1   | .   |                             |        |        |        |         |         |   |
| 1332   | NH1 | NH1 | . ARG ARG ARG A A 178 178 . | 0.4619 | 0.3895 | 0.3620 | -0.0723 | 0.0215  | - |
| 0.0583 | 1   | .   |                             |        |        |        |         |         |   |
| 1333   | NH2 | NH2 | . ARG ARG ARG A A 178 178 . | 0.4327 | 0.3380 | 0.3529 | -0.0479 | -0.0003 | - |
| 0.0104 | 1   | .   |                             |        |        |        |         |         |   |
| 1334   | C   | C   | . ARG ARG ARG A A 178 178 . | 0.1165 | 0.1171 | 0.1014 | 0.0000  | -0.0011 |   |
| 0.0079 | 1   | .   |                             |        |        |        |         |         |   |
| 1335   | O   | O   | . ARG ARG ARG A A 178 178 . | 0.0902 | 0.0919 | 0.0922 | -0.0057 | 0.0048  | - |
| 0.0131 | 1   | .   |                             |        |        |        |         |         |   |
| 1336   | N   | N   | . ASP ASP ASP A A 179 179 . | 0.1265 | 0.1021 | 0.1263 | 0.0086  | -0.0134 | - |
| 0.0061 | 1   | .   |                             |        |        |        |         |         |   |
| 1337   | CA  | CA  | . ASP ASP ASP A A 179 179 . | 0.1064 | 0.1120 | 0.0780 | -0.0018 | 0.0056  | - |
| 0.0197 | 1   | .   |                             |        |        |        |         |         |   |
| 1338   | CB  | CB  | . ASP ASP ASP A A 179 179 . | 0.1457 | 0.1169 | 0.0948 | 0.0080  | -0.0120 | - |
| 0.0142 | 1   | .   |                             |        |        |        |         |         |   |
| 1339   | CG  | CG  | . ASP ASP ASP A A 179 179 . | 0.1502 | 0.1588 | 0.1768 | 0.0179  | 0.0028  | - |
| 0.0125 | 1   | .   |                             |        |        |        |         |         |   |
| 1340   | OD1 | OD1 | . ASP ASP ASP A A 179 179 . | 0.2398 | 0.2234 | 0.2551 | 0.0258  | -0.0263 |   |
| 0.0176 | 1   | .   |                             |        |        |        |         |         |   |
| 1341   | OD2 | OD2 | . ASP ASP ASP A A 179 179 . | 0.2602 | 0.2220 | 0.1887 | 0.0268  | 0.0182  | - |
| 0.0254 | 1   | .   |                             |        |        |        |         |         |   |
| 1342   | C   | C   | . ASP ASP ASP A A 179 179 . | 0.1080 | 0.0758 | 0.0951 | -0.0072 | 0.0157  | - |
| 0.0052 | 1   | .   |                             |        |        |        |         |         |   |

|        |     |     |                             |        |        |        |         |         |   |
|--------|-----|-----|-----------------------------|--------|--------|--------|---------|---------|---|
| 1343   | O   | O   | . ASP ASP ASP A A 179 179 . | 0.1045 | 0.0972 | 0.1089 | -0.0088 | 0.0132  | - |
| 0.0102 | 1   | .   |                             |        |        |        |         |         |   |
| 1344   | N   | N   | . ALA ALA ALA A A 180 180 . | 0.1043 | 0.1007 | 0.1045 | 0.0151  | -0.0109 |   |
| 0.0108 | 1   | .   |                             |        |        |        |         |         |   |
| 1345   | CA  | CA  | . ALA ALA ALA A A 180 180 . | 0.0919 | 0.0863 | 0.0827 | 0.0148  | -0.0041 |   |
| 0.0184 | 1   | .   |                             |        |        |        |         |         |   |
| 1346   | CB  | CB  | . ALA ALA ALA A A 180 180 . | 0.1084 | 0.1052 | 0.1135 | 0.0086  | 0.0097  |   |
| 0.0197 | 1   | .   |                             |        |        |        |         |         |   |
| 1347   | C   | C   | . ALA ALA ALA A A 180 180 . | 0.0673 | 0.0852 | 0.0777 | 0.0076  | 0.0047  |   |
| 0.0026 | 1   | .   |                             |        |        |        |         |         |   |
| 1348   | O   | O   | . ALA ALA ALA A A 180 180 . | 0.0821 | 0.1035 | 0.0827 | 0.0070  | -0.0098 | - |
| 0.0097 | 1   | .   |                             |        |        |        |         |         |   |
| 1349   | N   | N   | . MET MET MET A A 181 181 . | 0.0968 | 0.0927 | 0.0822 | -0.0082 | -0.0032 | - |
| 0.0156 | 1   | .   |                             |        |        |        |         |         |   |
| 1350   | CA  | CA  | . MET MET MET A A 181 181 . | 0.0915 | 0.0965 | 0.0936 | -0.0124 | -0.0027 | - |
| 0.0042 | 1   | .   |                             |        |        |        |         |         |   |
| 1351   | CB  | CB  | . MET MET MET A A 181 181 . | 0.0901 | 0.0998 | 0.1156 | -0.0076 | -0.0095 | - |
| 0.0012 | 1   | .   |                             |        |        |        |         |         |   |
| 1352   | CG  | CG  | . MET MET MET A A 181 181 . | 0.0914 | 0.0942 | 0.1178 | 0.0084  | 0.0202  |   |
| 0.0067 | 1   | .   |                             |        |        |        |         |         |   |
| 1353   | SD  | SD  | . MET MET MET A A 181 181 . | 0.1065 | 0.1092 | 0.1068 | 0.0075  | 0.0006  | - |
| 0.0022 | 1   | .   |                             |        |        |        |         |         |   |
| 1354   | CE  | CE  | . MET MET MET A A 181 181 . | 0.1146 | 0.0903 | 0.0852 | -0.0031 | 0.0139  | - |
| 0.0068 | 1   | .   |                             |        |        |        |         |         |   |
| 1355   | C   | C   | . MET MET MET A A 181 181 . | 0.0878 | 0.0884 | 0.0903 | -0.0102 | -0.0142 | - |
| 0.0142 | 1   | .   |                             |        |        |        |         |         |   |
| 1356   | O   | O   | . MET MET MET A A 181 181 . | 0.0922 | 0.1190 | 0.1113 | -0.0068 | -0.0073 | - |
| 0.0041 | 1   | .   |                             |        |        |        |         |         |   |
| 1357   | N   | N   | . ARG ARG ARG A A 182 182 . | 0.0837 | 0.0944 | 0.0977 | -0.0071 | -0.0123 | - |
| 0.0166 | 1   | .   |                             |        |        |        |         |         |   |
| 1358   | CA  | CA  | . ARG ARG ARG A A 182 182 . | 0.0898 | 0.0809 | 0.1121 | 0.0142  | -0.0078 |   |
| 0.0039 | 1   | .   |                             |        |        |        |         |         |   |
| 1359   | CB  | CB  | . ARG ARG ARG A A 182 182 . | 0.0987 | 0.0823 | 0.1499 | 0.0059  | 0.0143  | - |
| 0.0052 | 1   | .   |                             |        |        |        |         |         |   |
| 1360   | CG  | CG  | . ARG ARG ARG A A 182 182 . | 0.1684 | 0.1074 | 0.1541 | -0.0178 | 0.0075  |   |
| 0.0134 | 1   | .   |                             |        |        |        |         |         |   |
| 1361   | CD  | CD  | . ARG ARG ARG A A 182 182 . | 0.1807 | 0.0745 | 0.3291 | 0.0391  | 0.0491  |   |
| 0.0331 | 1   | .   |                             |        |        |        |         |         |   |
| 1362   | NE  | NE  | . ARG ARG ARG A A 182 182 . | 0.2370 | 0.1536 | 0.2834 | 0.0426  | 0.0458  | - |
| 0.0311 | 1   | .   |                             |        |        |        |         |         |   |
| 1363   | CZ  | CZ  | . ARG ARG ARG A A 182 182 . | 0.2786 | 0.2290 | 0.3132 | 0.0048  | 0.0289  | - |
| 0.0462 | 1   | .   |                             |        |        |        |         |         |   |
| 1364   | NH1 | NH1 | . ARG ARG ARG A A 182 182 . | 0.2640 | 0.2083 | 0.3309 | 0.0015  | -0.0123 | - |
| 0.0728 | 1   | .   |                             |        |        |        |         |         |   |
| 1365   | NH2 | NH2 | . ARG ARG ARG A A 182 182 . | 0.2833 | 0.3441 | 0.2909 | 0.0130  | 0.0440  | - |
| 0.0662 | 1   | .   |                             |        |        |        |         |         |   |
| 1366   | C   | C   | . ARG ARG ARG A A 182 182 . | 0.1152 | 0.0803 | 0.1108 | -0.0078 | 0.0010  |   |
| 0.0000 | 1   | .   |                             |        |        |        |         |         |   |
| 1367   | O   | O   | . ARG ARG ARG A A 182 182 . | 0.1007 | 0.1147 | 0.1126 | -0.0041 | 0.0060  |   |
| 0.0125 | 1   | .   |                             |        |        |        |         |         |   |
| 1368   | N   | N   | . LEU LEU LEU A A 183 183 . | 0.1218 | 0.0931 | 0.1055 | -0.0109 | -0.0121 | - |
| 0.0056 | 1   | .   |                             |        |        |        |         |         |   |
| 1369   | CA  | CA  | . LEU LEU LEU A A 183 183 . | 0.1102 | 0.1093 | 0.1011 | 0.0155  | -0.0114 |   |
| 0.0025 | 1   | .   |                             |        |        |        |         |         |   |
| 1370   | CB  | CB  | . LEU LEU LEU A A 183 183 . | 0.1462 | 0.0883 | 0.1176 | 0.0021  | -0.0118 |   |
| 0.0012 | 1   | .   |                             |        |        |        |         |         |   |
| 1371   | CG  | CG  | . LEU LEU LEU A A 183 183 . | 0.1355 | 0.1358 | 0.1097 | 0.0275  | 0.0110  | - |
| 0.0126 | 1   | .   |                             |        |        |        |         |         |   |
| 1372   | CD1 | CD1 | . LEU LEU LEU A A 183 183 . | 0.1672 | 0.1177 | 0.2038 | 0.0540  | 0.0226  | - |
| 0.0157 | 1   | .   |                             |        |        |        |         |         |   |





|        |     |     |                             |        |        |        |         |         |   |
|--------|-----|-----|-----------------------------|--------|--------|--------|---------|---------|---|
| 1433   | CG  | CG  | . LEU LEU LEU A A 191 191 . | 0.1053 | 0.0839 | 0.1306 | -0.0059 | -0.0176 |   |
| 0.0191 | 1   | .   |                             |        |        |        |         |         |   |
| 1434   | CD1 | CD1 | . LEU LEU LEU A A 191 191 . | 0.1267 | 0.1285 | 0.1360 | 0.0018  | -0.0550 | - |
| 0.0127 | 1   | .   |                             |        |        |        |         |         |   |
| 1435   | CD2 | CD2 | . LEU LEU LEU A A 191 191 . | 0.1627 | 0.1206 | 0.1287 | -0.0095 | 0.0127  |   |
| 0.0231 | 1   | .   |                             |        |        |        |         |         |   |
| 1436   | C   | C   | . LEU LEU LEU A A 191 191 . | 0.0855 | 0.0984 | 0.0842 | -0.0107 | -0.0111 |   |
| 0.0037 | 1   | .   |                             |        |        |        |         |         |   |
| 1437   | O   | O   | . LEU LEU LEU A A 191 191 . | 0.1111 | 0.0938 | 0.1239 | -0.0099 | 0.0117  | - |
| 0.0058 | 1   | .   |                             |        |        |        |         |         |   |
| 1438   | N   | N   | . LYS LYS LYS A A 192 192 . | 0.1049 | 0.0841 | 0.0918 | 0.0020  | -0.0099 | - |
| 0.0087 | 1   | .   |                             |        |        |        |         |         |   |
| 1439   | CA  | CA  | . LYS LYS LYS A A 192 192 . | 0.0830 | 0.1009 | 0.0861 | -0.0188 | -0.0027 | - |
| 0.0135 | 1   | .   |                             |        |        |        |         |         |   |
| 1440   | CB  | CB  | . LYS LYS LYS A A 192 192 . | 0.0925 | 0.1267 | 0.1072 | -0.0104 | -0.0128 | - |
| 0.0121 | 1   | .   |                             |        |        |        |         |         |   |
| 1441   | CG  | CG  | . LYS LYS LYS A A 192 192 . | 0.1219 | 0.1477 | 0.1045 | -0.0174 | -0.0169 | - |
| 0.0097 | 1   | .   |                             |        |        |        |         |         |   |
| 1442   | CD  | CD  | . LYS LYS LYS A A 192 192 . | 0.1459 | 0.1892 | 0.1552 | -0.0458 | -0.0092 |   |
| 0.0095 | 1   | .   |                             |        |        |        |         |         |   |
| 1443   | CE  | CE  | . LYS LYS LYS A A 192 192 . | 0.2418 | 0.2755 | 0.1491 | -0.0395 | -0.0433 | - |
| 0.0159 | 1   | .   |                             |        |        |        |         |         |   |
| 1444   | NZ  | NZ  | . LYS LYS LYS A A 192 192 . | 0.2771 | 0.3163 | 0.2303 | -0.0415 | -0.0850 |   |
| 0.0356 | 1   | .   |                             |        |        |        |         |         |   |
| 1445   | C   | C   | . LYS LYS LYS A A 192 192 . | 0.0986 | 0.1081 | 0.0920 | -0.0077 | 0.0057  |   |
| 0.0007 | 1   | .   |                             |        |        |        |         |         |   |
| 1446   | O   | O   | . LYS LYS LYS A A 192 192 . | 0.1180 | 0.1027 | 0.1154 | -0.0088 | 0.0184  | - |
| 0.0067 | 1   | .   |                             |        |        |        |         |         |   |
| 1447   | N   | N   | . GLY GLY GLY A A 193 193 . | 0.1119 | 0.1011 | 0.1315 | -0.0238 | -0.0120 |   |
| 0.0025 | 1   | .   |                             |        |        |        |         |         |   |
| 1448   | CA  | CA  | . GLY GLY GLY A A 193 193 . | 0.1446 | 0.0958 | 0.1346 | -0.0127 | 0.0000  |   |
| 0.0269 | 1   | .   |                             |        |        |        |         |         |   |
| 1449   | C   | C   | . GLY GLY GLY A A 193 193 . | 0.1429 | 0.1223 | 0.1410 | -0.0119 | 0.0056  |   |
| 0.0238 | 1   | .   |                             |        |        |        |         |         |   |
| 1450   | O   | O   | . GLY GLY GLY A A 193 193 . | 0.1414 | 0.1276 | 0.1776 | -0.0288 | 0.0147  |   |
| 0.0193 | 1   | .   |                             |        |        |        |         |         |   |
| 1451   | N   | N   | . VAL VAL VAL A A 194 194 . | 0.1326 | 0.1307 | 0.1304 | -0.0057 | -0.0035 | - |
| 0.0197 | 1   | .   |                             |        |        |        |         |         |   |
| 1452   | CA  | CA  | . VAL VAL VAL A A 194 194 . | 0.1166 | 0.1267 | 0.1432 | -0.0058 | -0.0078 | - |
| 0.0137 | 1   | .   |                             |        |        |        |         |         |   |
| 1453   | CB  | CB  | . VAL VAL VAL A A 194 194 . | 0.1332 | 0.1413 | 0.1261 | 0.0104  | -0.0209 | - |
| 0.0161 | 1   | .   |                             |        |        |        |         |         |   |
| 1454   | CG1 | CG1 | . VAL VAL VAL A A 194 194 . | 0.0871 | 0.2098 | 0.2095 | 0.0399  | -0.0178 | - |
| 0.0321 | 1   | .   |                             |        |        |        |         |         |   |
| 1455   | CG2 | CG2 | . VAL VAL VAL A A 194 194 . | 0.1709 | 0.1501 | 0.1419 | 0.0004  | -0.0007 | - |
| 0.0312 | 1   | .   |                             |        |        |        |         |         |   |
| 1456   | C   | C   | . VAL VAL VAL A A 194 194 . | 0.1388 | 0.1415 | 0.1833 | -0.0190 | 0.0099  | - |
| 0.0089 | 1   | .   |                             |        |        |        |         |         |   |
| 1457   | O   | O   | . VAL VAL VAL A A 194 194 . | 0.1102 | 0.1427 | 0.2193 | -0.0215 | 0.0177  | - |
| 0.0231 | 1   | .   |                             |        |        |        |         |         |   |
| 1458   | N   | N   | . ILE ILE ILE A A 195 195 . | 0.1248 | 0.1054 | 0.1394 | -0.0181 | 0.0036  | - |
| 0.0263 | 1   | .   |                             |        |        |        |         |         |   |
| 1459   | CA  | CA  | . ILE ILE ILE A A 195 195 . | 0.1237 | 0.1147 | 0.1514 | -0.0225 | 0.0049  | - |
| 0.0146 | 1   | .   |                             |        |        |        |         |         |   |
| 1460   | CB  | CB  | . ILE ILE ILE A A 195 195 . | 0.1483 | 0.1187 | 0.1467 | -0.0183 | 0.0104  | - |
| 0.0089 | 1   | .   |                             |        |        |        |         |         |   |
| 1461   | CG1 | CG1 | . ILE ILE ILE A A 195 195 . | 0.1651 | 0.1039 | 0.1859 | -0.0617 | 0.0038  |   |
| 0.0222 | 1   | .   |                             |        |        |        |         |         |   |
| 1462   | CD  | CD  | . ILE ILE ILE A A 195 195 . | 0.1318 | 0.1245 | 0.1919 | -0.0507 | 0.0022  | - |
| 0.0354 | 1   | .   |                             |        |        |        |         |         |   |





|        |     |     |                             |        |        |        |         |         |   |
|--------|-----|-----|-----------------------------|--------|--------|--------|---------|---------|---|
| 1493   | CA  | CA  | . TYR TYR TYR A A 199 199 . | 0.1336 | 0.1868 | 0.1726 | -0.0142 | 0.0179  |   |
| 0.0051 | 1   | .   |                             |        |        |        |         |         |   |
| 1494   | CB  | CB  | . TYR TYR TYR A A 199 199 . | 0.1360 | 0.1842 | 0.1903 | -0.0176 | 0.0004  |   |
| 0.0008 | 1   | .   |                             |        |        |        |         |         |   |
| 1495   | CG  | CG  | . TYR TYR TYR A A 199 199 . | 0.2055 | 0.1565 | 0.1631 | -0.0308 | 0.0124  |   |
| 0.0029 | 1   | .   |                             |        |        |        |         |         |   |
| 1496   | CD1 | CD1 | . TYR TYR TYR A A 199 199 . | 0.1890 | 0.1715 | 0.2457 | -0.0615 | 0.0459  |   |
| 0.0042 | 1   | .   |                             |        |        |        |         |         |   |
| 1497   | CE1 | CE1 | . TYR TYR TYR A A 199 199 . | 0.2284 | 0.1692 | 0.2538 | -0.0623 | 0.0228  | - |
| 0.0100 | 1   | .   |                             |        |        |        |         |         |   |
| 1498   | CZ  | CZ  | . TYR TYR TYR A A 199 199 . | 0.2619 | 0.1770 | 0.2555 | -0.0723 | 0.0088  |   |
| 0.0130 | 1   | .   |                             |        |        |        |         |         |   |
| 1499   | OH  | OH  | . TYR TYR TYR A A 199 199 . | 0.3649 | 0.2262 | 0.2796 | -0.0983 | -0.0378 |   |
| 0.0022 | 1   | .   |                             |        |        |        |         |         |   |
| 1500   | CE2 | CE2 | . TYR TYR TYR A A 199 199 . | 0.1886 | 0.1252 | 0.1894 | -0.0955 | -0.0097 |   |
| 0.0096 | 1   | .   |                             |        |        |        |         |         |   |
| 1501   | CD2 | CD2 | . TYR TYR TYR A A 199 199 . | 0.1669 | 0.1508 | 0.2025 | -0.0598 | -0.0411 |   |
| 0.0117 | 1   | .   |                             |        |        |        |         |         |   |
| 1502   | C   | C   | . TYR TYR TYR A A 199 199 . | 0.1512 | 0.1999 | 0.1797 | -0.0102 | -0.0041 | - |
| 0.0200 | 1   | .   |                             |        |        |        |         |         |   |
| 1503   | O   | O   | . TYR TYR TYR A A 199 199 . | 0.1829 | 0.2608 | 0.1927 | 0.0018  | 0.0189  | - |
| 0.0383 | 1   | .   |                             |        |        |        |         |         |   |
| 1504   | N   | N   | . GLY GLY GLY A A 200 200 . | 0.1642 | 0.1780 | 0.1811 | -0.0118 | -0.0048 | - |
| 0.0065 | 1   | .   |                             |        |        |        |         |         |   |
| 1505   | CA  | CA  | . GLY GLY GLY A A 200 200 . | 0.1395 | 0.1763 | 0.1885 | -0.0303 | -0.0114 | - |
| 0.0129 | 1   | .   |                             |        |        |        |         |         |   |
| 1506   | C   | C   | . GLY GLY GLY A A 200 200 . | 0.1537 | 0.1671 | 0.1699 | -0.0088 | -0.0031 | - |
| 0.0133 | 1   | .   |                             |        |        |        |         |         |   |
| 1507   | O   | O   | . GLY GLY GLY A A 200 200 . | 0.1397 | 0.1674 | 0.1397 | 0.0011  | -0.0178 | - |
| 0.0167 | 1   | .   |                             |        |        |        |         |         |   |
| 1508   | N   | N   | . LYS LYS LYS A A 201 201 . | 0.1563 | 0.1683 | 0.1783 | -0.0134 | -0.0263 |   |
| 0.0020 | 1   | .   |                             |        |        |        |         |         |   |
| 1509   | CA  | CA  | . LYS LYS LYS A A 201 201 . | 0.1770 | 0.1713 | 0.1740 | -0.0095 | -0.0143 | - |
| 0.0056 | 1   | .   |                             |        |        |        |         |         |   |
| 1510   | CB  | CB  | . LYS LYS LYS A A 201 201 . | 0.1778 | 0.1918 | 0.2015 | -0.0140 | -0.0088 |   |
| 0.0083 | 1   | .   |                             |        |        |        |         |         |   |
| 1511   | CG  | CG  | . LYS LYS LYS A A 201 201 . | 0.3005 | 0.2938 | 0.2224 | 0.0318  | -0.0061 |   |
| 0.0187 | 1   | .   |                             |        |        |        |         |         |   |
| 1512   | CD  | CD  | . LYS LYS LYS A A 201 201 . | 0.3246 | 0.4614 | 0.3548 | 0.0056  | -0.0328 |   |
| 0.1288 | 1   | .   |                             |        |        |        |         |         |   |
| 1513   | CE  | CE  | . LYS LYS LYS A A 201 201 . | 0.4566 | 0.5103 | 0.3943 | -0.0323 | -0.0195 |   |
| 0.1148 | 1   | .   |                             |        |        |        |         |         |   |
| 1514   | NZ  | NZ  | . LYS LYS LYS A A 201 201 . | 0.5100 | 0.5726 | 0.4809 | -0.0718 | 0.0042  |   |
| 0.1397 | 1   | .   |                             |        |        |        |         |         |   |
| 1515   | C   | C   | . LYS LYS LYS A A 201 201 . | 0.1626 | 0.1633 | 0.1516 | -0.0087 | -0.0034 | - |
| 0.0016 | 1   | .   |                             |        |        |        |         |         |   |
| 1516   | O   | O   | . LYS LYS LYS A A 201 201 . | 0.1605 | 0.1650 | 0.1938 | -0.0174 | -0.0343 | - |
| 0.0001 | 1   | .   |                             |        |        |        |         |         |   |
| 1517   | N   | N   | . ASP ASP ASP A A 202 202 . | 0.1655 | 0.1527 | 0.1801 | 0.0020  | -0.0245 | - |
| 0.0159 | 1   | .   |                             |        |        |        |         |         |   |
| 1518   | CA  | CA  | . ASP ASP ASP A A 202 202 . | 0.1570 | 0.1395 | 0.1568 | 0.0061  | 0.0010  | - |
| 0.0249 | 1   | .   |                             |        |        |        |         |         |   |
| 1519   | CB  | CB  | . ASP ASP ASP A A 202 202 . | 0.1397 | 0.1796 | 0.1760 | -0.0039 | 0.0090  | - |
| 0.0235 | 1   | .   |                             |        |        |        |         |         |   |
| 1520   | CG  | CG  | . ASP ASP ASP A A 202 202 . | 0.2106 | 0.2665 | 0.2500 | -0.0080 | -0.0130 | - |
| 0.0539 | 1   | .   |                             |        |        |        |         |         |   |
| 1521   | OD1 | OD1 | . ASP ASP ASP A A 202 202 . | 0.2434 | 0.2873 | 0.3466 | -0.0271 | 0.0096  |   |
| 0.0047 | 1   | .   |                             |        |        |        |         |         |   |
| 1522   | OD2 | OD2 | . ASP ASP ASP A A 202 202 . | 0.2817 | 0.3413 | 0.3471 | 0.0449  | -0.0141 | - |
| 0.0938 | 1   | .   |                             |        |        |        |         |         |   |

|        |     |     |                             |        |        |        |         |         |   |
|--------|-----|-----|-----------------------------|--------|--------|--------|---------|---------|---|
| 1523   | C   | C   | . ASP ASP ASP A A 202 202 . | 0.1609 | 0.1594 | 0.1753 | -0.0158 | 0.0072  | - |
| 0.0213 | 1   | .   |                             |        |        |        |         |         |   |
| 1524   | O   | O   | . ASP ASP ASP A A 202 202 . | 0.1870 | 0.1658 | 0.2030 | 0.0042  | 0.0332  | - |
| 0.0212 | 1   | .   |                             |        |        |        |         |         |   |
| 1525   | N   | N   | . ALA ALA ALA A A 203 203 . | 0.1126 | 0.1389 | 0.1317 | -0.0113 | 0.0032  | - |
| 0.0138 | 1   | .   |                             |        |        |        |         |         |   |
| 1526   | CA  | CA  | . ALA ALA ALA A A 203 203 . | 0.1105 | 0.1263 | 0.1418 | -0.0286 | -0.0043 | - |
| 0.0063 | 1   | .   |                             |        |        |        |         |         |   |
| 1527   | CB  | CB  | . ALA ALA ALA A A 203 203 . | 0.1183 | 0.1720 | 0.1236 | -0.0223 | -0.0324 | - |
| 0.0041 | 1   | .   |                             |        |        |        |         |         |   |
| 1528   | C   | C   | . ALA ALA ALA A A 203 203 . | 0.1093 | 0.1361 | 0.1366 | -0.0009 | -0.0068 |   |
| 0.0094 | 1   | .   |                             |        |        |        |         |         |   |
| 1529   | O   | O   | . ALA ALA ALA A A 203 203 . | 0.1395 | 0.1615 | 0.1448 | -0.0064 | -0.0160 | - |
| 0.0197 | 1   | .   |                             |        |        |        |         |         |   |
| 1530   | N   | N   | . THR THR THR A A 204 204 . | 0.1131 | 0.1143 | 0.1356 | 0.0000  | -0.0244 | - |
| 0.0150 | 1   | .   |                             |        |        |        |         |         |   |
| 1531   | CA  | CA  | . THR THR THR A A 204 204 . | 0.1244 | 0.1302 | 0.1487 | -0.0092 | -0.0062 | - |
| 0.0096 | 1   | .   |                             |        |        |        |         |         |   |
| 1532   | CB  | CB  | . THR THR THR A A 204 204 . | 0.1196 | 0.1398 | 0.1578 | -0.0195 | -0.0041 | - |
| 0.0341 | 1   | .   |                             |        |        |        |         |         |   |
| 1533   | OG1 | OG1 | . THR THR THR A A 204 204 . | 0.1375 | 0.1673 | 0.2211 | -0.0189 | 0.0020  |   |
| 0.0068 | 1   | .   |                             |        |        |        |         |         |   |
| 1534   | CG2 | CG2 | . THR THR THR A A 204 204 . | 0.1476 | 0.1430 | 0.1975 | -0.0405 | -0.0058 | - |
| 0.0356 | 1   | .   |                             |        |        |        |         |         |   |
| 1535   | C   | C   | . THR THR THR A A 204 204 . | 0.1059 | 0.0942 | 0.1367 | -0.0085 | -0.0016 | - |
| 0.0120 | 1   | .   |                             |        |        |        |         |         |   |
| 1536   | O   | O   | . THR THR THR A A 204 204 . | 0.1279 | 0.1413 | 0.1387 | -0.0318 | 0.0039  | - |
| 0.0149 | 1   | .   |                             |        |        |        |         |         |   |
| 1537   | N   | N   | . ASN ASN ASN A A 205 205 . | 0.1071 | 0.1054 | 0.1110 | -0.0300 | 0.0062  |   |
| 0.0016 | 1   | .   |                             |        |        |        |         |         |   |
| 1538   | CA  | CA  | . ASN ASN ASN A A 205 205 . | 0.1124 | 0.0902 | 0.1037 | -0.0098 | 0.0107  |   |
| 0.0033 | 1   | .   |                             |        |        |        |         |         |   |
| 1539   | CB  | CB  | . ASN ASN ASN A A 205 205 . | 0.1380 | 0.1012 | 0.1073 | -0.0159 | 0.0033  | - |
| 0.0099 | 1   | .   |                             |        |        |        |         |         |   |
| 1540   | CG  | CG  | . ASN ASN ASN A A 205 205 . | 0.1122 | 0.1752 | 0.1301 | -0.0163 | -0.0042 |   |
| 0.0098 | 1   | .   |                             |        |        |        |         |         |   |
| 1541   | OD1 | OD1 | . ASN ASN ASN A A 205 205 . | 0.1473 | 0.1713 | 0.1491 | -0.0007 | 0.0071  |   |
| 0.0368 | 1   | .   |                             |        |        |        |         |         |   |
| 1542   | ND2 | ND2 | . ASN ASN ASN A A 205 205 . | 0.1523 | 0.1971 | 0.1801 | -0.0398 | 0.0216  | - |
| 0.0186 | 1   | .   |                             |        |        |        |         |         |   |
| 1543   | C   | C   | . ASN ASN ASN A A 205 205 . | 0.1125 | 0.1066 | 0.0990 | -0.0276 | -0.0025 | - |
| 0.0029 | 1   | .   |                             |        |        |        |         |         |   |
| 1544   | O   | O   | . ASN ASN ASN A A 205 205 . | 0.1365 | 0.1239 | 0.0941 | -0.0195 | -0.0185 |   |
| 0.0080 | 1   | .   |                             |        |        |        |         |         |   |
| 1545   | N   | N   | . VAL VAL VAL A A 206 206 . | 0.1003 | 0.0820 | 0.1123 | -0.0097 | -0.0009 |   |
| 0.0017 | 1   | .   |                             |        |        |        |         |         |   |
| 1546   | CA  | CA  | . VAL VAL VAL A A 206 206 . | 0.0863 | 0.0908 | 0.0857 | -0.0029 | 0.0290  |   |
| 0.0023 | 1   | .   |                             |        |        |        |         |         |   |
| 1547   | CB  | CB  | . VAL VAL VAL A A 206 206 . | 0.0850 | 0.0859 | 0.1017 | -0.0101 | -0.0025 | - |
| 0.0098 | 1   | .   |                             |        |        |        |         |         |   |
| 1548   | CG1 | CG1 | . VAL VAL VAL A A 206 206 . | 0.0972 | 0.0954 | 0.1197 | 0.0100  | 0.0262  | - |
| 0.0160 | 1   | .   |                             |        |        |        |         |         |   |
| 1549   | CG2 | CG2 | . VAL VAL VAL A A 206 206 . | 0.1022 | 0.1183 | 0.1031 | 0.0035  | -0.0149 |   |
| 0.0135 | 1   | .   |                             |        |        |        |         |         |   |
| 1550   | C   | C   | . VAL VAL VAL A A 206 206 . | 0.0817 | 0.0990 | 0.0864 | -0.0082 | -0.0003 | - |
| 0.0059 | 1   | .   |                             |        |        |        |         |         |   |
| 1551   | O   | O   | . VAL VAL VAL A A 206 206 . | 0.0769 | 0.1034 | 0.0930 | -0.0076 | 0.0175  | - |
| 0.0090 | 1   | .   |                             |        |        |        |         |         |   |
| 1552   | N   | N   | . GLY GLY GLY A A 207 207 . | 0.0884 | 0.1065 | 0.1071 | 0.0000  | 0.0171  |   |
| 0.0226 | 1   | .   |                             |        |        |        |         |         |   |

|        |     |     |                             |        |        |        |         |         |   |
|--------|-----|-----|-----------------------------|--------|--------|--------|---------|---------|---|
| 1553   | CA  | CA  | . GLY GLY GLY A A 207 207 . | 0.1007 | 0.0813 | 0.1058 | 0.0091  | 0.0128  | - |
| 0.0006 | 1   | .   |                             |        |        |        |         |         |   |
| 1554   | C   | C   | . GLY GLY GLY A A 207 207 . | 0.0883 | 0.0993 | 0.0756 | 0.0150  | 0.0028  | - |
| 0.0057 | 1   | .   |                             |        |        |        |         |         |   |
| 1555   | O   | O   | . GLY GLY GLY A A 207 207 . | 0.0931 | 0.0902 | 0.0992 | 0.0023  | -0.0063 | - |
| 0.0016 | 1   | .   |                             |        |        |        |         |         |   |
| 1556   | N   | N   | . ASP ASP ASP A A 208 208 . | 0.1143 | 0.0849 | 0.1095 | -0.0195 | 0.0004  |   |
| 0.0105 | 1   | .   |                             |        |        |        |         |         |   |
| 1557   | CA  | CA  | . ASP ASP ASP A A 208 208 . | 0.0902 | 0.0891 | 0.1098 | -0.0043 | 0.0011  |   |
| 0.0083 | 1   | .   |                             |        |        |        |         |         |   |
| 1558   | CB  | CB  | . ASP ASP ASP A A 208 208 . | 0.0895 | 0.0974 | 0.0954 | 0.0010  | 0.0083  |   |
| 0.0065 | 1   | .   |                             |        |        |        |         |         |   |
| 1559   | CG  | CG  | . ASP ASP ASP A A 208 208 . | 0.1252 | 0.1296 | 0.1089 | 0.0104  | -0.0132 | - |
| 0.0082 | 1   | .   |                             |        |        |        |         |         |   |
| 1560   | OD1 | OD1 | . ASP ASP ASP A A 208 208 . | 0.1401 | 0.1605 | 0.1610 | 0.0167  | 0.0113  |   |
| 0.0163 | 1   | .   |                             |        |        |        |         |         |   |
| 1561   | OD2 | OD2 | . ASP ASP ASP A A 208 208 . | 0.1287 | 0.1380 | 0.1665 | 0.0258  | -0.0048 |   |
| 0.0166 | 1   | .   |                             |        |        |        |         |         |   |
| 1562   | C   | C   | . ASP ASP ASP A A 208 208 . | 0.1054 | 0.0837 | 0.0705 | 0.0052  | -0.0060 |   |
| 0.0086 | 1   | .   |                             |        |        |        |         |         |   |
| 1563   | O   | O   | . ASP ASP ASP A A 208 208 . | 0.0956 | 0.0961 | 0.0867 | -0.0124 | 0.0089  |   |
| 0.0021 | 1   | .   |                             |        |        |        |         |         |   |
| 1564   | N   | N   | . GLU GLU GLU A A 209 209 . | 0.0986 | 0.0683 | 0.0853 | 0.0200  | 0.0100  | - |
| 0.0006 | 1   | .   |                             |        |        |        |         |         |   |
| 1565   | CA  | CA  | . GLU GLU GLU A A 209 209 . | 0.0839 | 0.0795 | 0.0789 | 0.0054  | 0.0073  |   |
| 0.0137 | 1   | .   |                             |        |        |        |         |         |   |
| 1566   | CB  | CB  | . GLU GLU GLU A A 209 209 . | 0.1275 | 0.0849 | 0.0866 | 0.0241  | -0.0040 |   |
| 0.0026 | 1   | .   |                             |        |        |        |         |         |   |
| 1567   | CG  | CG  | . GLU GLU GLU A A 209 209 . | 0.1367 | 0.1082 | 0.1059 | 0.0133  | 0.0214  |   |
| 0.0161 | 1   | .   |                             |        |        |        |         |         |   |
| 1568   | CD  | CD  | . GLU GLU GLU A A 209 209 . | 0.1145 | 0.1618 | 0.1447 | 0.0069  | 0.0453  |   |
| 0.0096 | 1   | .   |                             |        |        |        |         |         |   |
| 1569   | OE1 | OE1 | . GLU GLU GLU A A 209 209 . | 0.1364 | 0.1290 | 0.1401 | 0.0018  | -0.0129 |   |
| 0.0157 | 1   | .   |                             |        |        |        |         |         |   |
| 1570   | OE2 | OE2 | . GLU GLU GLU A A 209 209 . | 0.1317 | 0.1211 | 0.1600 | 0.0040  | 0.0173  |   |
| 0.0162 | 1   | .   |                             |        |        |        |         |         |   |
| 1571   | C   | C   | . GLU GLU GLU A A 209 209 . | 0.0875 | 0.0899 | 0.0866 | -0.0070 | 0.0174  | - |
| 0.0037 | 1   | .   |                             |        |        |        |         |         |   |
| 1572   | O   | O   | . GLU GLU GLU A A 209 209 . | 0.0778 | 0.0936 | 0.0944 | -0.0135 | 0.0176  | - |
| 0.0095 | 1   | .   |                             |        |        |        |         |         |   |
| 1573   | N   | N   | . GLY GLY GLY A A 210 210 . | 0.0939 | 0.0731 | 0.0713 | -0.0081 | -0.0222 |   |
| 0.0124 | 1   | .   |                             |        |        |        |         |         |   |
| 1574   | CA  | CA  | . GLY GLY GLY A A 210 210 . | 0.0883 | 0.0742 | 0.0969 | -0.0077 | -0.0034 | - |
| 0.0149 | 1   | .   |                             |        |        |        |         |         |   |
| 1575   | C   | C   | . GLY GLY GLY A A 210 210 . | 0.0786 | 0.0791 | 0.0754 | 0.0042  | -0.0065 | - |
| 0.0132 | 1   | .   |                             |        |        |        |         |         |   |
| 1576   | O   | O   | . GLY GLY GLY A A 210 210 . | 0.1059 | 0.1051 | 0.0948 | 0.0179  | -0.0077 |   |
| 0.0003 | 1   | .   |                             |        |        |        |         |         |   |
| 1577   | N   | N   | . GLY GLY GLY A A 211 211 . | 0.0652 | 0.0949 | 0.0895 | -0.0219 | -0.0038 |   |
| 0.0000 | 1   | .   |                             |        |        |        |         |         |   |
| 1578   | CA  | CA  | . GLY GLY GLY A A 211 211 . | 0.0793 | 0.1095 | 0.0993 | -0.0410 | 0.0178  |   |
| 0.0010 | 1   | .   |                             |        |        |        |         |         |   |
| 1579   | C   | C   | . GLY GLY GLY A A 211 211 . | 0.0909 | 0.0790 | 0.0785 | -0.0072 | 0.0078  |   |
| 0.0060 | 1   | .   |                             |        |        |        |         |         |   |
| 1580   | O   | O   | . GLY GLY GLY A A 211 211 . | 0.1097 | 0.1232 | 0.1024 | -0.0027 | 0.0200  |   |
| 0.0004 | 1   | .   |                             |        |        |        |         |         |   |
| 1581   | N   | N   | . PHE PHE PHE A A 212 212 . | 0.1129 | 0.0863 | 0.0864 | -0.0216 | 0.0062  | - |
| 0.0074 | 1   | .   |                             |        |        |        |         |         |   |
| 1582   | CA  | CA  | . PHE PHE PHE A A 212 212 . | 0.0905 | 0.0820 | 0.1110 | -0.0022 | 0.0129  | - |
| 0.0094 | 1   | .   |                             |        |        |        |         |         |   |



|        |     |     |                             |        |        |        |         |         |
|--------|-----|-----|-----------------------------|--------|--------|--------|---------|---------|
| 1613   | CA  | CA  | . ILE ILE ILE A A 216 216 . | 0.1452 | 0.1522 | 0.1382 | -0.0267 | -0.0022 |
| 0.0142 | 1   | .   |                             |        |        |        |         |         |
| 1614   | CB  | CB  | . ILE ILE ILE A A 216 216 . | 0.1802 | 0.1677 | 0.1659 | -0.0091 | -0.0075 |
| 0.0277 | 1   | .   |                             |        |        |        |         |         |
| 1615   | CG1 | CG1 | . ILE ILE ILE A A 216 216 . | 0.1405 | 0.1451 | 0.1125 | -0.0223 | 0.0154  |
| 0.0019 | 1   | .   |                             |        |        |        |         |         |
| 1616   | CD  | CD  | . ILE ILE ILE A A 216 216 . | 0.2031 | 0.1434 | 0.1967 | 0.0031  | -0.0057 |
| 0.0255 | 1   | .   |                             |        |        |        |         |         |
| 1617   | CG2 | CG2 | . ILE ILE ILE A A 216 216 . | 0.2291 | 0.1851 | 0.2107 | 0.0304  | -0.0127 |
| 0.0407 | 1   | .   |                             |        |        |        |         |         |
| 1618   | C   | C   | . ILE ILE ILE A A 216 216 . | 0.1315 | 0.1668 | 0.1610 | -0.0176 | -0.0009 |
| 0.0097 | 1   | .   |                             |        |        |        |         |         |
| 1619   | O   | O   | . ILE ILE ILE A A 216 216 . | 0.1339 | 0.1633 | 0.1675 | -0.0135 | 0.0109  |
| 0.0188 | 1   | .   |                             |        |        |        |         |         |
| 1620   | N   | N   | . LEU LEU LEU A A 217 217 . | 0.1379 | 0.1757 | 0.1318 | -0.0150 | -0.0153 |
| 0.0336 | 1   | .   |                             |        |        |        |         |         |
| 1621   | CA  | CA  | . LEU LEU LEU A A 217 217 . | 0.1282 | 0.1834 | 0.1652 | 0.0120  | 0.0067  |
| 0.0200 | 1   | .   |                             |        |        |        |         |         |
| 1622   | CB  | CB  | . LEU LEU LEU A A 217 217 . | 0.1453 | 0.2219 | 0.2226 | 0.0010  | -0.0075 |
| 0.0495 | 1   | .   |                             |        |        |        |         |         |
| 1623   | CG  | CG  | . LEU LEU LEU A A 217 217 . | 0.1198 | 0.2198 | 0.1815 | 0.0167  | 0.0025  |
| 0.0255 | 1   | .   |                             |        |        |        |         |         |
| 1624   | CD1 | CD1 | . LEU LEU LEU A A 217 217 . | 0.1581 | 0.2377 | 0.1850 | 0.0231  | -0.0025 |
| 0.0307 | 1   | .   |                             |        |        |        |         |         |
| 1625   | CD2 | CD2 | . LEU LEU LEU A A 217 217 . | 0.1062 | 0.1953 | 0.2655 | 0.0175  | 0.0147  |
| 0.0354 | 1   | .   |                             |        |        |        |         |         |
| 1626   | C   | C   | . LEU LEU LEU A A 217 217 . | 0.1420 | 0.1767 | 0.1779 | 0.0037  | 0.0162  |
| 0.0096 | 1   | .   |                             |        |        |        |         |         |
| 1627   | O   | O   | . LEU LEU LEU A A 217 217 . | 0.1580 | 0.1815 | 0.1875 | -0.0169 | 0.0139  |
| 0.0299 | 1   | .   |                             |        |        |        |         |         |
| 1628   | N   | N   | . GLU GLU GLU A A 218 218 . | 0.1451 | 0.1597 | 0.1809 | -0.0118 | 0.0070  |
| 0.0065 | 1   | .   |                             |        |        |        |         |         |
| 1629   | CA  | CA  | . GLU GLU GLU A A 218 218 . | 0.1480 | 0.1742 | 0.1838 | -0.0067 | 0.0198  |
| 0.0024 | 1   | .   |                             |        |        |        |         |         |
| 1630   | CB  | CB  | . GLU GLU GLU A A 218 218 . | 0.1779 | 0.2093 | 0.2201 | -0.0460 | 0.0275  |
| 0.0172 | 1   | .   |                             |        |        |        |         |         |
| 1631   | CG  | CG  | . GLU GLU GLU A A 218 218 . | 0.2148 | 0.3376 | 0.3516 | -0.0333 | -0.0104 |
| 0.0180 | 1   | .   |                             |        |        |        |         |         |
| 1632   | CD  | CD  | . GLU GLU GLU A A 218 218 . | 0.4144 | 0.5213 | 0.4648 | -0.0685 | -0.0542 |
| 0.0373 | 1   | .   |                             |        |        |        |         |         |
| 1633   | OE1 | OE1 | . GLU GLU GLU A A 218 218 . | 0.5201 | 0.5003 | 0.6106 | -0.0800 | -0.0054 |
| 0.0189 | 1   | .   |                             |        |        |        |         |         |
| 1634   | OE2 | OE2 | . GLU GLU GLU A A 218 218 . | 0.4458 | 0.5628 | 0.5436 | -0.0630 | -0.0043 |
| 0.0758 | 1   | .   |                             |        |        |        |         |         |
| 1635   | C   | C   | . GLU GLU GLU A A 218 218 . | 0.1601 | 0.1690 | 0.1756 | -0.0020 | 0.0089  |
| 0.0157 | 1   | .   |                             |        |        |        |         |         |
| 1636   | O   | O   | . GLU GLU GLU A A 218 218 . | 0.1705 | 0.1535 | 0.1591 | -0.0019 | 0.0057  |
| 0.0021 | 1   | .   |                             |        |        |        |         |         |
| 1637   | N   | N   | . ASN ASN ASN A A 219 219 . | 0.1451 | 0.1679 | 0.1553 | -0.0115 | -0.0044 |
| 0.0241 | 1   | .   |                             |        |        |        |         |         |
| 1638   | CA  | CA  | . ASN ASN ASN A A 219 219 . | 0.1262 | 0.1292 | 0.1458 | -0.0039 | -0.0079 |
| 0.0204 | 1   | .   |                             |        |        |        |         |         |
| 1639   | CB  | CB  | . ASN ASN ASN A A 219 219 . | 0.1546 | 0.1128 | 0.1215 | 0.0112  | -0.0088 |
| 0.0167 | 1   | .   |                             |        |        |        |         |         |
| 1640   | CG  | CG  | . ASN ASN ASN A A 219 219 . | 0.1141 | 0.1229 | 0.1258 | 0.0039  | 0.0065  |
| 0.0035 | 1   | .   |                             |        |        |        |         |         |
| 1641   | OD1 | OD1 | . ASN ASN ASN A A 219 219 . | 0.1639 | 0.2014 | 0.2039 | 0.0633  | 0.0191  |
| 0.0480 | 1   | .   |                             |        |        |        |         |         |
| 1642   | ND2 | ND2 | . ASN ASN ASN A A 219 219 . | 0.0645 | 0.0954 | 0.1196 | 0.0004  | -0.0077 |
| 0.0036 | 1   | .   |                             |        |        |        |         |         |

|        |     |     |                             |        |        |        |         |         |   |
|--------|-----|-----|-----------------------------|--------|--------|--------|---------|---------|---|
| 1643   | C   | C   | . ASN ASN ASN A A 219 219 . | 0.1337 | 0.1462 | 0.1518 | 0.0019  | -0.0035 |   |
| 0.0156 | 1   | .   |                             |        |        |        |         |         |   |
| 1644   | O   | O   | . ASN ASN ASN A A 219 219 . | 0.1264 | 0.1538 | 0.1784 | -0.0070 | -0.0205 |   |
| 0.0257 | 1   | .   |                             |        |        |        |         |         |   |
| 1645   | N   | N   | . SER SER SER A A 220 220 . | 0.1395 | 0.1494 | 0.1562 | -0.0120 | -0.0124 |   |
| 0.0041 | 1   | .   |                             |        |        |        |         |         |   |
| 1646   | CA  | CA  | . SER SER SER A A 220 220 . | 0.1361 | 0.1590 | 0.1483 | -0.0019 | -0.0333 |   |
| 0.0032 | 1   | .   |                             |        |        |        |         |         |   |
| 1647   | CB  | CB  | . SER SER SER A A 220 220 . | 0.1710 | 0.1817 | 0.1731 | -0.0269 | -0.0122 | - |
| 0.0303 | 1   | .   |                             |        |        |        |         |         |   |
| 1648   | OG  | OG  | . SER SER SER A A 220 220 . | 0.1981 | 0.2579 | 0.2356 | -0.0539 | -0.0284 |   |
| 0.0365 | 1   | .   |                             |        |        |        |         |         |   |
| 1649   | C   | C   | . SER SER SER A A 220 220 . | 0.1339 | 0.1611 | 0.1613 | -0.0121 | -0.0194 | - |
| 0.0014 | 1   | .   |                             |        |        |        |         |         |   |
| 1650   | O   | O   | . SER SER SER A A 220 220 . | 0.1549 | 0.1672 | 0.1399 | 0.0169  | -0.0092 |   |
| 0.0100 | 1   | .   |                             |        |        |        |         |         |   |
| 1651   | N   | N   | . GLU GLU GLU A A 221 221 . | 0.1470 | 0.1567 | 0.1576 | -0.0005 | -0.0198 |   |
| 0.0210 | 1   | .   |                             |        |        |        |         |         |   |
| 1652   | CA  | CA  | . GLU GLU GLU A A 221 221 . | 0.1310 | 0.1534 | 0.1422 | -0.0061 | -0.0107 |   |
| 0.0104 | 1   | .   |                             |        |        |        |         |         |   |
| 1653   | CB  | CB  | . GLU GLU GLU A A 221 221 . | 0.1892 | 0.1824 | 0.1680 | -0.0173 | -0.0065 |   |
| 0.0288 | 1   | .   |                             |        |        |        |         |         |   |
| 1654   | CG  | CG  | . GLU GLU GLU A A 221 221 . | 0.1824 | 0.1855 | 0.2181 | -0.0296 | -0.0251 |   |
| 0.0328 | 1   | .   |                             |        |        |        |         |         |   |
| 1655   | CD  | CD  | . GLU GLU GLU A A 221 221 . | 0.3591 | 0.2522 | 0.3334 | -0.0363 | -0.0648 | - |
| 0.0157 | 1   | .   |                             |        |        |        |         |         |   |
| 1656   | OE1 | OE1 | . GLU GLU GLU A A 221 221 . | 0.4125 | 0.3913 | 0.3185 | -0.0397 | -0.0785 |   |
| 0.0217 | 1   | .   |                             |        |        |        |         |         |   |
| 1657   | OE2 | OE2 | . GLU GLU GLU A A 221 221 . | 0.3592 | 0.3618 | 0.3804 | -0.0558 | -0.1003 |   |
| 0.0165 | 1   | .   |                             |        |        |        |         |         |   |
| 1658   | C   | C   | . GLU GLU GLU A A 221 221 . | 0.1242 | 0.1227 | 0.1324 | -0.0012 | -0.0062 |   |
| 0.0009 | 1   | .   |                             |        |        |        |         |         |   |
| 1659   | O   | O   | . GLU GLU GLU A A 221 221 . | 0.1354 | 0.1339 | 0.1529 | -0.0029 | 0.0028  |   |
| 0.0059 | 1   | .   |                             |        |        |        |         |         |   |
| 1660   | N   | N   | . ALA ALA ALA A A 222 222 . | 0.1098 | 0.1137 | 0.1267 | 0.0026  | 0.0074  |   |
| 0.0093 | 1   | .   |                             |        |        |        |         |         |   |
| 1661   | CA  | CA  | . ALA ALA ALA A A 222 222 . | 0.1268 | 0.1363 | 0.1305 | -0.0117 | -0.0038 |   |
| 0.0031 | 1   | .   |                             |        |        |        |         |         |   |
| 1662   | CB  | CB  | . ALA ALA ALA A A 222 222 . | 0.1413 | 0.1216 | 0.1348 | -0.0106 | -0.0086 | - |
| 0.0050 | 1   | .   |                             |        |        |        |         |         |   |
| 1663   | C   | C   | . ALA ALA ALA A A 222 222 . | 0.1357 | 0.1330 | 0.1271 | 0.0005  | -0.0154 |   |
| 0.0110 | 1   | .   |                             |        |        |        |         |         |   |
| 1664   | O   | O   | . ALA ALA ALA A A 222 222 . | 0.1351 | 0.1235 | 0.1109 | -0.0184 | -0.0185 |   |
| 0.0100 | 1   | .   |                             |        |        |        |         |         |   |
| 1665   | N   | N   | . LEU LEU LEU A A 223 223 . | 0.1105 | 0.1163 | 0.0949 | -0.0298 | -0.0115 |   |
| 0.0112 | 1   | .   |                             |        |        |        |         |         |   |
| 1666   | CA  | CA  | . LEU LEU LEU A A 223 223 . | 0.1340 | 0.1387 | 0.1276 | -0.0105 | -0.0180 |   |
| 0.0130 | 1   | .   |                             |        |        |        |         |         |   |
| 1667   | CB  | CB  | . LEU LEU LEU A A 223 223 . | 0.0970 | 0.1271 | 0.1095 | -0.0100 | -0.0158 |   |
| 0.0278 | 1   | .   |                             |        |        |        |         |         |   |
| 1668   | CG  | CG  | . LEU LEU LEU A A 223 223 . | 0.1017 | 0.1325 | 0.1300 | -0.0046 | -0.0228 |   |
| 0.0155 | 1   | .   |                             |        |        |        |         |         |   |
| 1669   | CD1 | CD1 | . LEU LEU LEU A A 223 223 . | 0.1458 | 0.1746 | 0.1355 | -0.0055 | -0.0425 |   |
| 0.0570 | 1   | .   |                             |        |        |        |         |         |   |
| 1670   | CD2 | CD2 | . LEU LEU LEU A A 223 223 . | 0.1205 | 0.1710 | 0.1582 | -0.0086 | 0.0202  | - |
| 0.0014 | 1   | .   |                             |        |        |        |         |         |   |
| 1671   | C   | C   | . LEU LEU LEU A A 223 223 . | 0.1192 | 0.1249 | 0.1305 | -0.0051 | -0.0075 |   |
| 0.0031 | 1   | .   |                             |        |        |        |         |         |   |
| 1672   | O   | O   | . LEU LEU LEU A A 223 223 . | 0.1319 | 0.1362 | 0.1478 | 0.0224  | -0.0204 | - |
| 0.0165 | 1   | .   |                             |        |        |        |         |         |   |

|        |     |     |                             |        |        |        |         |         |   |
|--------|-----|-----|-----------------------------|--------|--------|--------|---------|---------|---|
| 1673   | N   | N   | . GLU GLU GLU A A 224 224 . | 0.1160 | 0.1234 | 0.1311 | -0.0102 | -0.0173 |   |
| 0.0130 | 1   | .   |                             |        |        |        |         |         |   |
| 1674   | CA  | CA  | . GLU GLU GLU A A 224 224 . | 0.1479 | 0.1596 | 0.1678 | -0.0048 | -0.0112 |   |
| 0.0101 | 1   | .   |                             |        |        |        |         |         |   |
| 1675   | CB  | CB  | . GLU GLU GLU A A 224 224 . | 0.1462 | 0.1596 | 0.2190 | -0.0189 | -0.0169 | - |
| 0.0089 | 1   | .   |                             |        |        |        |         |         |   |
| 1676   | CG  | CG  | . GLU GLU GLU A A 224 224 . | 0.2846 | 0.2413 | 0.2815 | -0.0160 | -0.0259 | - |
| 0.0031 | 1   | .   |                             |        |        |        |         |         |   |
| 1677   | CD  | CD  | . GLU GLU GLU A A 224 224 . | 0.4286 | 0.3247 | 0.3106 | -0.0308 | 0.0085  | - |
| 0.0597 | 1   | .   |                             |        |        |        |         |         |   |
| 1678   | OE1 | OE1 | . GLU GLU GLU A A 224 224 . | 0.6005 | 0.4032 | 0.4809 | -0.0146 | 0.0127  | - |
| 0.0390 | 1   | .   |                             |        |        |        |         |         |   |
| 1679   | OE2 | OE2 | . GLU GLU GLU A A 224 224 . | 0.4379 | 0.3517 | 0.3522 | -0.1340 | 0.0337  |   |
| 0.0130 | 1   | .   |                             |        |        |        |         |         |   |
| 1680   | C   | C   | . GLU GLU GLU A A 224 224 . | 0.1227 | 0.1237 | 0.1340 | -0.0044 | 0.0016  |   |
| 0.0054 | 1   | .   |                             |        |        |        |         |         |   |
| 1681   | O   | O   | . GLU GLU GLU A A 224 224 . | 0.1386 | 0.1378 | 0.1607 | -0.0045 | -0.0230 | - |
| 0.0061 | 1   | .   |                             |        |        |        |         |         |   |
| 1682   | N   | N   | . LEU LEU LEU A A 225 225 . | 0.1442 | 0.1189 | 0.1423 | -0.0120 | -0.0110 |   |
| 0.0117 | 1   | .   |                             |        |        |        |         |         |   |
| 1683   | CA  | CA  | . LEU LEU LEU A A 225 225 . | 0.1158 | 0.1435 | 0.1129 | -0.0123 | -0.0040 |   |
| 0.0147 | 1   | .   |                             |        |        |        |         |         |   |
| 1684   | CB  | CB  | . LEU LEU LEU A A 225 225 . | 0.1204 | 0.1286 | 0.1271 | -0.0167 | 0.0108  | - |
| 0.0109 | 1   | .   |                             |        |        |        |         |         |   |
| 1685   | CG  | CG  | . LEU LEU LEU A A 225 225 . | 0.1555 | 0.1582 | 0.1722 | -0.0140 | 0.0165  |   |
| 0.0283 | 1   | .   |                             |        |        |        |         |         |   |
| 1686   | CD1 | CD1 | . LEU LEU LEU A A 225 225 . | 0.1342 | 0.1789 | 0.1205 | 0.0136  | 0.0036  |   |
| 0.0238 | 1   | .   |                             |        |        |        |         |         |   |
| 1687   | CD2 | CD2 | . LEU LEU LEU A A 225 225 . | 0.2148 | 0.1663 | 0.1897 | -0.0515 | 0.0411  |   |
| 0.0525 | 1   | .   |                             |        |        |        |         |         |   |
| 1688   | C   | C   | . LEU LEU LEU A A 225 225 . | 0.1159 | 0.1340 | 0.1250 | -0.0011 | 0.0080  |   |
| 0.0064 | 1   | .   |                             |        |        |        |         |         |   |
| 1689   | O   | O   | . LEU LEU LEU A A 225 225 . | 0.1247 | 0.1203 | 0.1207 | -0.0015 | -0.0051 |   |
| 0.0045 | 1   | .   |                             |        |        |        |         |         |   |
| 1690   | N   | N   | . VAL VAL VAL A A 226 226 . | 0.0974 | 0.1136 | 0.1164 | -0.0051 | -0.0105 |   |
| 0.0068 | 1   | .   |                             |        |        |        |         |         |   |
| 1691   | CA  | CA  | . VAL VAL VAL A A 226 226 . | 0.1074 | 0.1111 | 0.1236 | -0.0136 | -0.0149 | - |
| 0.0040 | 1   | .   |                             |        |        |        |         |         |   |
| 1692   | CB  | CB  | . VAL VAL VAL A A 226 226 . | 0.1176 | 0.1187 | 0.0896 | -0.0184 | -0.0078 |   |
| 0.0234 | 1   | .   |                             |        |        |        |         |         |   |
| 1693   | CG1 | CG1 | . VAL VAL VAL A A 226 226 . | 0.1256 | 0.1363 | 0.1407 | -0.0192 | 0.0272  |   |
| 0.0135 | 1   | .   |                             |        |        |        |         |         |   |
| 1694   | CG2 | CG2 | . VAL VAL VAL A A 226 226 . | 0.1377 | 0.1508 | 0.1035 | -0.0392 | -0.0022 | - |
| 0.0184 | 1   | .   |                             |        |        |        |         |         |   |
| 1695   | C   | C   | . VAL VAL VAL A A 226 226 . | 0.0919 | 0.1222 | 0.1273 | -0.0090 | -0.0105 |   |
| 0.0033 | 1   | .   |                             |        |        |        |         |         |   |
| 1696   | O   | O   | . VAL VAL VAL A A 226 226 . | 0.1098 | 0.1129 | 0.1372 | 0.0212  | -0.0171 | - |
| 0.0045 | 1   | .   |                             |        |        |        |         |         |   |
| 1697   | N   | N   | . LYS LYS LYS A A 227 227 . | 0.1191 | 0.1343 | 0.1165 | -0.0015 | -0.0232 | - |
| 0.0048 | 1   | .   |                             |        |        |        |         |         |   |
| 1698   | CA  | CA  | . LYS LYS LYS A A 227 227 . | 0.1554 | 0.1410 | 0.1573 | -0.0012 | -0.0328 | - |
| 0.0179 | 1   | .   |                             |        |        |        |         |         |   |
| 1699   | CB  | CB  | . LYS LYS LYS A A 227 227 . | 0.1870 | 0.1566 | 0.1474 | 0.0020  | -0.0462 | - |
| 0.0239 | 1   | .   |                             |        |        |        |         |         |   |
| 1700   | CG  | CG  | . LYS LYS LYS A A 227 227 . | 0.2113 | 0.2112 | 0.1731 | 0.0089  | -0.0601 | - |
| 0.0342 | 1   | .   |                             |        |        |        |         |         |   |
| 1701   | CD  | CD  | . LYS LYS LYS A A 227 227 . | 0.3126 | 0.3703 | 0.2736 | 0.0288  | -0.0737 | - |
| 0.0115 | 1   | .   |                             |        |        |        |         |         |   |
| 1702   | CE  | CE  | . LYS LYS LYS A A 227 227 . | 0.3690 | 0.3720 | 0.2945 | 0.0517  | -0.0739 |   |
| 0.0311 | 1   | .   |                             |        |        |        |         |         |   |



|        |     |     |                             |        |        |        |         |         |   |
|--------|-----|-----|-----------------------------|--------|--------|--------|---------|---------|---|
| 1703   | NZ  | NZ  | . LYS LYS LYS A A 227 227 . | 0.3145 | 0.3237 | 0.4201 | 0.0387  | -0.1502 |   |
| 0.0161 | 1   | .   |                             |        |        |        |         |         |   |
| 1704   | C   | C   | . LYS LYS LYS A A 227 227 . | 0.1336 | 0.1347 | 0.1254 | -0.0103 | -0.0193 | - |
| 0.0179 | 1   | .   |                             |        |        |        |         |         |   |
| 1705   | O   | O   | . LYS LYS LYS A A 227 227 . | 0.1297 | 0.1354 | 0.1609 | -0.0026 | -0.0085 | - |
| 0.0040 | 1   | .   |                             |        |        |        |         |         |   |
| 1706   | N   | N   | . GLU GLU GLU A A 228 228 . | 0.1273 | 0.1318 | 0.1487 | -0.0107 | -0.0199 |   |
| 0.0003 | 1   | .   |                             |        |        |        |         |         |   |
| 1707   | CA  | CA  | . GLU GLU GLU A A 228 228 . | 0.1120 | 0.1230 | 0.1285 | -0.0115 | -0.0276 | - |
| 0.0006 | 1   | .   |                             |        |        |        |         |         |   |
| 1708   | CB  | CB  | . GLU GLU GLU A A 228 228 . | 0.1738 | 0.1629 | 0.1705 | -0.0094 | -0.0070 |   |
| 0.0208 | 1   | .   |                             |        |        |        |         |         |   |
| 1709   | CG  | CG  | . GLU GLU GLU A A 228 228 . | 0.2498 | 0.1847 | 0.2265 | -0.0238 | -0.0637 |   |
| 0.0133 | 1   | .   |                             |        |        |        |         |         |   |
| 1710   | CD  | CD  | . GLU GLU GLU A A 228 228 . | 0.5220 | 0.3735 | 0.4529 | -0.0857 | -0.0303 |   |
| 0.0053 | 1   | .   |                             |        |        |        |         |         |   |
| 1711   | OE1 | OE1 | . GLU GLU GLU A A 228 228 . | 0.5862 | 0.4953 | 0.4631 | -0.1100 | 0.0253  |   |
| 0.0158 | 1   | .   |                             |        |        |        |         |         |   |
| 1712   | OE2 | OE2 | . GLU GLU GLU A A 228 228 . | 0.6332 | 0.4721 | 0.5464 | -0.0860 | -0.0302 |   |
| 0.1006 | 1   | .   |                             |        |        |        |         |         |   |
| 1713   | C   | C   | . GLU GLU GLU A A 228 228 . | 0.1148 | 0.1296 | 0.1444 | -0.0043 | -0.0237 | - |
| 0.0095 | 1   | .   |                             |        |        |        |         |         |   |
| 1714   | O   | O   | . GLU GLU GLU A A 228 228 . | 0.1482 | 0.1368 | 0.1559 | -0.0081 | -0.0067 | - |
| 0.0150 | 1   | .   |                             |        |        |        |         |         |   |
| 1715   | N   | N   | . ALA ALA ALA A A 229 229 . | 0.1230 | 0.1224 | 0.1318 | -0.0066 | -0.0086 | - |
| 0.0073 | 1   | .   |                             |        |        |        |         |         |   |
| 1716   | CA  | CA  | . ALA ALA ALA A A 229 229 . | 0.1312 | 0.1358 | 0.1284 | -0.0014 | -0.0195 | - |
| 0.0108 | 1   | .   |                             |        |        |        |         |         |   |
| 1717   | CB  | CB  | . ALA ALA ALA A A 229 229 . | 0.1297 | 0.1064 | 0.1026 | -0.0115 | 0.0022  | - |
| 0.0086 | 1   | .   |                             |        |        |        |         |         |   |
| 1718   | C   | C   | . ALA ALA ALA A A 229 229 . | 0.1341 | 0.1196 | 0.1287 | -0.0025 | -0.0186 |   |
| 0.0012 | 1   | .   |                             |        |        |        |         |         |   |
| 1719   | O   | O   | . ALA ALA ALA A A 229 229 . | 0.1289 | 0.1112 | 0.1247 | -0.0043 | -0.0160 | - |
| 0.0045 | 1   | .   |                             |        |        |        |         |         |   |
| 1720   | N   | N   | . ILE ILE ILE A A 230 230 . | 0.1424 | 0.1099 | 0.1114 | -0.0126 | -0.0072 | - |
| 0.0007 | 1   | .   |                             |        |        |        |         |         |   |
| 1721   | CA  | CA  | . ILE ILE ILE A A 230 230 . | 0.1438 | 0.1063 | 0.1107 | -0.0085 | -0.0101 | - |
| 0.0186 | 1   | .   |                             |        |        |        |         |         |   |
| 1722   | CB  | CB  | . ILE ILE ILE A A 230 230 . | 0.1246 | 0.0984 | 0.1198 | -0.0084 | -0.0016 | - |
| 0.0143 | 1   | .   |                             |        |        |        |         |         |   |
| 1723   | CG1 | CG1 | . ILE ILE ILE A A 230 230 . | 0.1302 | 0.1075 | 0.0926 | 0.0124  | -0.0436 | - |
| 0.0049 | 1   | .   |                             |        |        |        |         |         |   |
| 1724   | CD  | CD  | . ILE ILE ILE A A 230 230 . | 0.1187 | 0.1266 | 0.1102 | 0.0135  | 0.0279  |   |
| 0.0198 | 1   | .   |                             |        |        |        |         |         |   |
| 1725   | CG2 | CG2 | . ILE ILE ILE A A 230 230 . | 0.1755 | 0.1147 | 0.1264 | 0.0207  | 0.0086  | - |
| 0.0189 | 1   | .   |                             |        |        |        |         |         |   |
| 1726   | C   | C   | . ILE ILE ILE A A 230 230 . | 0.1152 | 0.1215 | 0.1284 | 0.0040  | -0.0157 | - |
| 0.0221 | 1   | .   |                             |        |        |        |         |         |   |
| 1727   | O   | O   | . ILE ILE ILE A A 230 230 . | 0.1233 | 0.1250 | 0.1262 | 0.0190  | 0.0012  | - |
| 0.0250 | 1   | .   |                             |        |        |        |         |         |   |
| 1728   | N   | N   | . ASP ASP ASP A A 231 231 . | 0.1191 | 0.1250 | 0.1239 | -0.0164 | -0.0201 | - |
| 0.0125 | 1   | .   |                             |        |        |        |         |         |   |
| 1729   | CA  | CA  | . ASP ASP ASP A A 231 231 . | 0.1451 | 0.1444 | 0.1733 | 0.0071  | -0.0210 | - |
| 0.0239 | 1   | .   |                             |        |        |        |         |         |   |
| 1730   | CB  | CB  | . ASP ASP ASP A A 231 231 . | 0.1610 | 0.1524 | 0.1909 | -0.0300 | -0.0236 | - |
| 0.0440 | 1   | .   |                             |        |        |        |         |         |   |
| 1731   | CG  | CG  | . ASP ASP ASP A A 231 231 . | 0.2152 | 0.2561 | 0.2602 | -0.0110 | -0.0383 | - |
| 0.0276 | 1   | .   |                             |        |        |        |         |         |   |
| 1732   | OD1 | OD1 | . ASP ASP ASP A A 231 231 . | 0.2057 | 0.3261 | 0.3913 | -0.0324 | -0.0550 | - |
| 0.0374 | 1   | .   |                             |        |        |        |         |         |   |







|        |     |     |                             |        |        |        |         |         |   |
|--------|-----|-----|-----------------------------|--------|--------|--------|---------|---------|---|
| 1823   | CE  | CE  | . MET MET MET A A 243 243 . | 0.1415 | 0.1736 | 0.1897 | -0.0204 | 0.0058  | - |
| 0.0250 | 1   | .   |                             |        |        |        |         |         |   |
| 1824   | C   | C   | . MET MET MET A A 243 243 . | 0.0960 | 0.1174 | 0.1008 | -0.0042 | -0.0023 |   |
| 0.0051 | 1   | .   |                             |        |        |        |         |         |   |
| 1825   | O   | O   | . MET MET MET A A 243 243 . | 0.1418 | 0.1100 | 0.1022 | 0.0100  | -0.0113 |   |
| 0.0236 | 1   | .   |                             |        |        |        |         |         |   |
| 1826   | N   | N   | . ASP ASP ASP A A 244 244 . | 0.1018 | 0.0981 | 0.1105 | 0.0093  | -0.0055 |   |
| 0.0040 | 1   | .   |                             |        |        |        |         |         |   |
| 1827   | CA  | CA  | . ASP ASP ASP A A 244 244 . | 0.0909 | 0.0934 | 0.1225 | 0.0077  | -0.0036 | - |
| 0.0058 | 1   | .   |                             |        |        |        |         |         |   |
| 1828   | CB  | CB  | . ASP ASP ASP A A 244 244 . | 0.1086 | 0.1128 | 0.1134 | 0.0118  | -0.0449 |   |
| 0.0068 | 1   | .   |                             |        |        |        |         |         |   |
| 1829   | CG  | CG  | . ASP ASP ASP A A 244 244 . | 0.1146 | 0.1105 | 0.1185 | 0.0006  | -0.0102 | - |
| 0.0092 | 1   | .   |                             |        |        |        |         |         |   |
| 1830   | OD1 | OD1 | . ASP ASP ASP A A 244 244 . | 0.1031 | 0.0865 | 0.1059 | 0.0050  | -0.0164 |   |
| 0.0043 | 1   | .   |                             |        |        |        |         |         |   |
| 1831   | OD2 | OD2 | . ASP ASP ASP A A 244 244 . | 0.1010 | 0.1047 | 0.0956 | -0.0056 | -0.0100 | - |
| 0.0037 | 1   | .   |                             |        |        |        |         |         |   |
| 1832   | C   | C   | . ASP ASP ASP A A 244 244 . | 0.1016 | 0.1101 | 0.0980 | -0.0043 | -0.0021 |   |
| 0.0127 | 1   | .   |                             |        |        |        |         |         |   |
| 1833   | O   | O   | . ASP ASP ASP A A 244 244 . | 0.1130 | 0.1011 | 0.0984 | -0.0019 | 0.0003  |   |
| 0.0072 | 1   | .   |                             |        |        |        |         |         |   |
| 1834   | N   | N   | . VAL VAL VAL A A 245 245 . | 0.0844 | 0.0918 | 0.0993 | 0.0113  | -0.0081 |   |
| 0.0011 | 1   | .   |                             |        |        |        |         |         |   |
| 1835   | CA  | CA  | . VAL VAL VAL A A 245 245 . | 0.1077 | 0.1141 | 0.0886 | -0.0057 | -0.0039 | - |
| 0.0081 | 1   | .   |                             |        |        |        |         |         |   |
| 1836   | CB  | CB  | . VAL VAL VAL A A 245 245 . | 0.0881 | 0.1165 | 0.1217 | 0.0253  | -0.0197 | - |
| 0.0077 | 1   | .   |                             |        |        |        |         |         |   |
| 1837   | CG1 | CG1 | . VAL VAL VAL A A 245 245 . | 0.0910 | 0.1566 | 0.1284 | 0.0030  | 0.0095  |   |
| 0.0107 | 1   | .   |                             |        |        |        |         |         |   |
| 1838   | CG2 | CG2 | . VAL VAL VAL A A 245 245 . | 0.1059 | 0.1492 | 0.1115 | 0.0160  | -0.0219 | - |
| 0.0281 | 1   | .   |                             |        |        |        |         |         |   |
| 1839   | C   | C   | . VAL VAL VAL A A 245 245 . | 0.1213 | 0.1211 | 0.1183 | 0.0025  | -0.0172 |   |
| 0.0023 | 1   | .   |                             |        |        |        |         |         |   |
| 1840   | O   | O   | . VAL VAL VAL A A 245 245 . | 0.1075 | 0.1383 | 0.1171 | 0.0205  | -0.0088 |   |
| 0.0105 | 1   | .   |                             |        |        |        |         |         |   |
| 1841   | N   | N   | . ALA ALA ALA A A 246 246 . | 0.1095 | 0.0952 | 0.1031 | 0.0026  | -0.0161 |   |
| 0.0081 | 1   | .   |                             |        |        |        |         |         |   |
| 1842   | CA  | CA  | . ALA ALA ALA A A 246 246 . | 0.1085 | 0.1159 | 0.1023 | 0.0247  | -0.0073 | - |
| 0.0036 | 1   | .   |                             |        |        |        |         |         |   |
| 1843   | CB  | CB  | . ALA ALA ALA A A 246 246 . | 0.1177 | 0.1168 | 0.0896 | 0.0116  | -0.0153 |   |
| 0.0062 | 1   | .   |                             |        |        |        |         |         |   |
| 1844   | C   | C   | . ALA ALA ALA A A 246 246 . | 0.0891 | 0.1315 | 0.0831 | 0.0166  | -0.0062 |   |
| 0.0080 | 1   | .   |                             |        |        |        |         |         |   |
| 1845   | O   | O   | . ALA ALA ALA A A 246 246 . | 0.1451 | 0.1369 | 0.1110 | 0.0267  | -0.0057 |   |
| 0.0259 | 1   | .   |                             |        |        |        |         |         |   |
| 1846   | N   | N   | . ALA ALA ALA A A 247 247 . | 0.1076 | 0.1376 | 0.1007 | 0.0133  | -0.0239 |   |
| 0.0085 | 1   | .   |                             |        |        |        |         |         |   |
| 1847   | CA  | CA  | . ALA ALA ALA A A 247 247 . | 0.1135 | 0.1400 | 0.1140 | 0.0249  | -0.0116 |   |
| 0.0031 | 1   | .   |                             |        |        |        |         |         |   |
| 1848   | CB  | CB  | . ALA ALA ALA A A 247 247 . | 0.1199 | 0.1614 | 0.1199 | 0.0271  | -0.0259 |   |
| 0.0343 | 1   | .   |                             |        |        |        |         |         |   |
| 1849   | C   | C   | . ALA ALA ALA A A 247 247 . | 0.1211 | 0.1324 | 0.1177 | 0.0155  | -0.0068 |   |
| 0.0152 | 1   | .   |                             |        |        |        |         |         |   |
| 1850   | O   | O   | . ALA ALA ALA A A 247 247 . | 0.1047 | 0.1411 | 0.1446 | 0.0130  | 0.0066  |   |
| 0.0131 | 1   | .   |                             |        |        |        |         |         |   |
| 1851   | N   | N   | . SER SER SER A A 248 248 . | 0.1283 | 0.0954 | 0.1072 | 0.0139  | -0.0276 | - |
| 0.0018 | 1   | .   |                             |        |        |        |         |         |   |
| 1852   | CA  | CA  | . SER SER SER A A 248 248 . | 0.1326 | 0.1026 | 0.1352 | 0.0341  | 0.0142  |   |
| 0.0098 | 1   | .   |                             |        |        |        |         |         |   |

|        |     |     |                             |        |        |        |         |         |   |
|--------|-----|-----|-----------------------------|--------|--------|--------|---------|---------|---|
| 1853   | CB  | CB  | . SER SER SER A A 248 248 . | 0.1244 | 0.1212 | 0.1089 | 0.0085  | -0.0039 | - |
| 0.0017 | 1   | .   |                             |        |        |        |         |         |   |
| 1854   | OG  | OG  | . SER SER SER A A 248 248 . | 0.1161 | 0.1241 | 0.1238 | 0.0044  | -0.0138 | - |
| 0.0016 | 1   | .   |                             |        |        |        |         |         |   |
| 1855   | C   | C   | . SER SER SER A A 248 248 . | 0.1208 | 0.1228 | 0.1313 | 0.0260  | 0.0121  |   |
| 0.0027 | 1   | .   |                             |        |        |        |         |         |   |
| 1856   | O   | O   | . SER SER SER A A 248 248 . | 0.1839 | 0.1630 | 0.1477 | 0.0523  | 0.0085  |   |
| 0.0183 | 1   | .   |                             |        |        |        |         |         |   |
| 1857   | N   | N   | . GLU GLU GLU A A 249 249 . | 0.1096 | 0.1375 | 0.1185 | 0.0119  | 0.0089  |   |
| 0.0206 | 1   | .   |                             |        |        |        |         |         |   |
| 1858   | CA  | CA  | . GLU GLU GLU A A 249 249 . | 0.1333 | 0.1708 | 0.1403 | 0.0156  | 0.0110  |   |
| 0.0123 | 1   | .   |                             |        |        |        |         |         |   |
| 1859   | CB  | CB  | . GLU GLU GLU A A 249 249 . | 0.1037 | 0.1698 | 0.1492 | 0.0151  | 0.0188  |   |
| 0.0376 | 1   | .   |                             |        |        |        |         |         |   |
| 1860   | CG  | CG  | . GLU GLU GLU A A 249 249 . | 0.1667 | 0.1169 | 0.1490 | -0.0363 | 0.0090  |   |
| 0.0064 | 1   | .   |                             |        |        |        |         |         |   |
| 1861   | CD  | CD  | . GLU GLU GLU A A 249 249 . | 0.1557 | 0.1714 | 0.1642 | 0.0022  | 0.0412  | - |
| 0.0122 | 1   | .   |                             |        |        |        |         |         |   |
| 1862   | OE1 | OE1 | . GLU GLU GLU A A 249 249 . | 0.2905 | 0.2822 | 0.1986 | -0.0008 | 0.0124  |   |
| 0.0215 | 1   | .   |                             |        |        |        |         |         |   |
| 1863   | OE2 | OE2 | . GLU GLU GLU A A 249 249 . | 0.1540 | 0.1743 | 0.1556 | 0.0299  | -0.0003 | - |
| 0.0092 | 1   | .   |                             |        |        |        |         |         |   |
| 1864   | C   | C   | . GLU GLU GLU A A 249 249 . | 0.1347 | 0.1789 | 0.1334 | 0.0031  | 0.0103  |   |
| 0.0085 | 1   | .   |                             |        |        |        |         |         |   |
| 1865   | O   | O   | . GLU GLU GLU A A 249 249 . | 0.1671 | 0.1771 | 0.1394 | 0.0169  | 0.0158  |   |
| 0.0177 | 1   | .   |                             |        |        |        |         |         |   |
| 1866   | N   | N   | . PHE PHE PHE A A 250 250 . | 0.1229 | 0.1388 | 0.1675 | 0.0149  | 0.0153  |   |
| 0.0097 | 1   | .   |                             |        |        |        |         |         |   |
| 1867   | CA  | CA  | . PHE PHE PHE A A 250 250 . | 0.1302 | 0.1585 | 0.1805 | 0.0186  | 0.0166  |   |
| 0.0171 | 1   | .   |                             |        |        |        |         |         |   |
| 1868   | CB  | CB  | . PHE PHE PHE A A 250 250 . | 0.1536 | 0.1678 | 0.1358 | 0.0127  | 0.0192  |   |
| 0.0147 | 1   | .   |                             |        |        |        |         |         |   |
| 1869   | CG  | CG  | . PHE PHE PHE A A 250 250 . | 0.1427 | 0.1842 | 0.1394 | 0.0292  | -0.0008 | - |
| 0.0002 | 1   | .   |                             |        |        |        |         |         |   |
| 1870   | CD1 | CD1 | . PHE PHE PHE A A 250 250 . | 0.1336 | 0.1468 | 0.1800 | -0.0141 | -0.0056 |   |
| 0.0068 | 1   | .   |                             |        |        |        |         |         |   |
| 1871   | CE1 | CE1 | . PHE PHE PHE A A 250 250 . | 0.0817 | 0.1618 | 0.1412 | -0.0337 | 0.0035  |   |
| 0.0038 | 1   | .   |                             |        |        |        |         |         |   |
| 1872   | CZ  | CZ  | . PHE PHE PHE A A 250 250 . | 0.1120 | 0.1613 | 0.1338 | -0.0233 | 0.0144  |   |
| 0.0216 | 1   | .   |                             |        |        |        |         |         |   |
| 1873   | CE2 | CE2 | . PHE PHE PHE A A 250 250 . | 0.1340 | 0.1822 | 0.1851 | -0.0023 | 0.0181  |   |
| 0.0111 | 1   | .   |                             |        |        |        |         |         |   |
| 1874   | CD2 | CD2 | . PHE PHE PHE A A 250 250 . | 0.1635 | 0.1882 | 0.1569 | -0.0062 | -0.0191 |   |
| 0.0057 | 1   | .   |                             |        |        |        |         |         |   |
| 1875   | C   | C   | . PHE PHE PHE A A 250 250 . | 0.1577 | 0.1583 | 0.1788 | 0.0066  | 0.0036  |   |
| 0.0149 | 1   | .   |                             |        |        |        |         |         |   |
| 1876   | O   | O   | . PHE PHE PHE A A 250 250 . | 0.1481 | 0.1498 | 0.2312 | 0.0358  | -0.0021 |   |
| 0.0234 | 1   | .   |                             |        |        |        |         |         |   |
| 1877   | N   | N   | . TYR TYR TYR A A 251 251 . | 0.1513 | 0.1727 | 0.2094 | 0.0323  | 0.0062  |   |
| 0.0326 | 1   | .   |                             |        |        |        |         |         |   |
| 1878   | CA  | CA  | . TYR TYR TYR A A 251 251 . | 0.1549 | 0.1633 | 0.1731 | 0.0298  | 0.0051  |   |
| 0.0286 | 1   | .   |                             |        |        |        |         |         |   |
| 1879   | CB  | CB  | . TYR TYR TYR A A 251 251 . | 0.1624 | 0.1809 | 0.1712 | 0.0214  | -0.0049 |   |
| 0.0490 | 1   | .   |                             |        |        |        |         |         |   |
| 1880   | CG  | CG  | . TYR TYR TYR A A 251 251 . | 0.1355 | 0.1934 | 0.2281 | 0.0179  | 0.0320  |   |
| 0.0389 | 1   | .   |                             |        |        |        |         |         |   |
| 1881   | CD1 | CD1 | . TYR TYR TYR A A 251 251 . | 0.1686 | 0.2069 | 0.1781 | 0.0295  | 0.0102  |   |
| 0.0506 | 1   | .   |                             |        |        |        |         |         |   |
| 1882   | CE1 | CE1 | . TYR TYR TYR A A 251 251 . | 0.1622 | 0.2116 | 0.1819 | 0.0573  | 0.0036  |   |
| 0.0348 | 1   | .   |                             |        |        |        |         |         |   |

|        |     |     |                             |        |        |        |        |         |
|--------|-----|-----|-----------------------------|--------|--------|--------|--------|---------|
| 1883   | CZ  | CZ  | . TYR TYR TYR A A 251 251 . | 0.2717 | 0.2009 | 0.2100 | 0.0407 | -0.0228 |
| 0.0803 | 1   | .   |                             |        |        |        |        |         |
| 1884   | OH  | OH  | . TYR TYR TYR A A 251 251 . | 0.3634 | 0.2819 | 0.3124 | 0.0576 | -0.0393 |
| 0.1356 | 1   | .   |                             |        |        |        |        |         |
| 1885   | CE2 | CE2 | . TYR TYR TYR A A 251 251 . | 0.2395 | 0.2253 | 0.2589 | 0.0153 | -0.0461 |
| 0.1073 | 1   | .   |                             |        |        |        |        |         |
| 1886   | CD2 | CD2 | . TYR TYR TYR A A 251 251 . | 0.1631 | 0.1920 | 0.2496 | 0.0287 | -0.0176 |
| 0.0219 | 1   | .   |                             |        |        |        |        |         |
| 1887   | C   | C   | . TYR TYR TYR A A 251 251 . | 0.1720 | 0.2020 | 0.1992 | 0.0218 | 0.0077  |
| 0.0160 | 1   | .   |                             |        |        |        |        |         |
| 1888   | O   | O   | . TYR TYR TYR A A 251 251 . | 0.1728 | 0.1917 | 0.2045 | 0.0455 | 0.0235  |
| 0.0167 | 1   | .   |                             |        |        |        |        |         |
| 1889   | N   | N   | . ARG ARG ARG A A 252 252 . | 0.1724 | 0.2210 | 0.2176 | 0.0431 | 0.0228  |
| 0.0080 | 1   | .   |                             |        |        |        |        |         |
| 1890   | CA  | CA  | . ARG ARG ARG A A 252 252 . | 0.2127 | 0.2583 | 0.2403 | 0.0374 | 0.0173  |
| 0.0047 | 1   | .   |                             |        |        |        |        |         |
| 1891   | CB  | CB  | . ARG ARG ARG A A 252 252 . | 0.2178 | 0.2718 | 0.2307 | 0.0400 | 0.0276  |
| 0.0018 | 1   | .   |                             |        |        |        |        |         |
| 1892   | CG  | CG  | . ARG ARG ARG A A 252 252 . | 0.2134 | 0.2615 | 0.2303 | 0.0376 | 0.0326  |
| 0.0238 | 1   | .   |                             |        |        |        |        |         |
| 1893   | CD  | CD  | . ARG ARG ARG A A 252 252 . | 0.2497 | 0.2922 | 0.2609 | 0.0024 | -0.0424 |
| 0.0344 | 1   | .   |                             |        |        |        |        |         |
| 1894   | NE  | NE  | . ARG ARG ARG A A 252 252 . | 0.2845 | 0.2778 | 0.2480 | 0.0189 | -0.0173 |
| 0.0546 | 1   | .   |                             |        |        |        |        |         |
| 1895   | CZ  | CZ  | . ARG ARG ARG A A 252 252 . | 0.2548 | 0.2922 | 0.2576 | 0.0184 | -0.0157 |
| 0.0736 | 1   | .   |                             |        |        |        |        |         |
| 1896   | NH1 | NH1 | . ARG ARG ARG A A 252 252 . | 0.1838 | 0.2907 | 0.2138 | 0.0273 | 0.0146  |
| 0.0413 | 1   | .   |                             |        |        |        |        |         |
| 1897   | NH2 | NH2 | . ARG ARG ARG A A 252 252 . | 0.1508 | 0.3247 | 0.2914 | 0.0360 | -0.0182 |
| 0.0115 | 1   | .   |                             |        |        |        |        |         |
| 1898   | C   | C   | . ARG ARG ARG A A 252 252 . | 0.2555 | 0.3104 | 0.2476 | 0.0304 | 0.0081  |
| 0.0047 | 1   | .   |                             |        |        |        |        |         |
| 1899   | O   | O   | . ARG ARG ARG A A 252 252 . | 0.2116 | 0.3962 | 0.2665 | 0.0470 | 0.0253  |
| 0.0139 | 1   | .   |                             |        |        |        |        |         |
| 1900   | N   | N   | . ASP ASP ASP A A 253 253 . | 0.3175 | 0.3643 | 0.3021 | 0.0578 | -0.0191 |
| 0.0058 | 1   | .   |                             |        |        |        |        |         |
| 1901   | CA  | CA  | . ASP ASP ASP A A 253 253 . | 0.3572 | 0.3935 | 0.3263 | 0.0550 | -0.0137 |
| 0.0095 | 1   | .   |                             |        |        |        |        |         |
| 1902   | CB  | CB  | . ASP ASP ASP A A 253 253 . | 0.3773 | 0.4226 | 0.3334 | 0.0444 | -0.0122 |
| 0.0161 | 1   | .   |                             |        |        |        |        |         |
| 1903   | CG  | CG  | . ASP ASP ASP A A 253 253 . | 0.4236 | 0.4645 | 0.4141 | 0.0246 | 0.0159  |
| 0.0091 | 1   | .   |                             |        |        |        |        |         |
| 1904   | OD1 | OD1 | . ASP ASP ASP A A 253 253 . | 0.4236 | 0.5182 | 0.4672 | 0.0363 | 0.0392  |
| 0.0118 | 1   | .   |                             |        |        |        |        |         |
| 1905   | OD2 | OD2 | . ASP ASP ASP A A 253 253 . | 0.4748 | 0.5577 | 0.4065 | 0.0956 | 0.0534  |
| 0.0439 | 1   | .   |                             |        |        |        |        |         |
| 1906   | C   | C   | . ASP ASP ASP A A 253 253 . | 0.3493 | 0.3827 | 0.3252 | 0.0409 | -0.0141 |
| 0.0170 | 1   | .   |                             |        |        |        |        |         |
| 1907   | O   | O   | . ASP ASP ASP A A 253 253 . | 0.3661 | 0.3904 | 0.3496 | 0.0572 | -0.0069 |
| 0.0068 | 1   | .   |                             |        |        |        |        |         |
| 1908   | N   | N   | . GLY GLY GLY A A 254 254 . | 0.2995 | 0.3132 | 0.2985 | 0.0550 | -0.0139 |
| 0.0391 | 1   | .   |                             |        |        |        |        |         |
| 1909   | CA  | CA  | . GLY GLY GLY A A 254 254 . | 0.2505 | 0.2454 | 0.2610 | 0.0306 | -0.0103 |
| 0.0308 | 1   | .   |                             |        |        |        |        |         |
| 1910   | C   | C   | . GLY GLY GLY A A 254 254 . | 0.2136 | 0.2380 | 0.2291 | 0.0263 | -0.0119 |
| 0.0301 | 1   | .   |                             |        |        |        |        |         |
| 1911   | O   | O   | . GLY GLY GLY A A 254 254 . | 0.2445 | 0.2208 | 0.2501 | 0.0186 | -0.0110 |
| 0.0383 | 1   | .   |                             |        |        |        |        |         |
| 1912   | N   | N   | . LYS LYS LYS A A 255 255 . | 0.1712 | 0.2380 | 0.2210 | 0.0383 | -0.0163 |
| 0.0264 | 1   | .   |                             |        |        |        |        |         |

|        |     |     |                             |        |        |        |         |         |
|--------|-----|-----|-----------------------------|--------|--------|--------|---------|---------|
| 1913   | CA  | CA  | . LYS LYS LYS A A 255 255 . | 0.1807 | 0.2496 | 0.2184 | 0.0138  | -0.0383 |
| 0.0509 | 1   | .   |                             |        |        |        |         |         |
| 1914   | CB  | CB  | . LYS LYS LYS A A 255 255 . | 0.2053 | 0.2794 | 0.2222 | 0.0056  | -0.0484 |
| 0.0565 | 1   | .   |                             |        |        |        |         |         |
| 1915   | CG  | CG  | . LYS LYS LYS A A 255 255 . | 0.2017 | 0.3513 | 0.2470 | 0.0129  | -0.0404 |
| 0.0884 | 1   | .   |                             |        |        |        |         |         |
| 1916   | CD  | CD  | . LYS LYS LYS A A 255 255 . | 0.2116 | 0.4853 | 0.4064 | -0.0287 | -0.0241 |
| 0.0523 | 1   | .   |                             |        |        |        |         |         |
| 1917   | CE  | CE  | . LYS LYS LYS A A 255 255 . | 0.2779 | 0.5094 | 0.4871 | -0.0410 | 0.0154  |
| 0.0090 | 1   | .   |                             |        |        |        |         |         |
| 1918   | NZ  | NZ  | . LYS LYS LYS A A 255 255 . | 0.2649 | 0.5374 | 0.5391 | -0.0846 | 0.0434  |
| 0.0007 | 1   | .   |                             |        |        |        |         |         |
| 1919   | C   | C   | . LYS LYS LYS A A 255 255 . | 0.1651 | 0.2171 | 0.2149 | 0.0145  | -0.0170 |
| 0.0329 | 1   | .   |                             |        |        |        |         |         |
| 1920   | O   | O   | . LYS LYS LYS A A 255 255 . | 0.1815 | 0.2336 | 0.2414 | 0.0273  | -0.0172 |
| 0.0407 | 1   | .   |                             |        |        |        |         |         |
| 1921   | N   | N   | . TYR TYR TYR A A 256 256 . | 0.1669 | 0.2117 | 0.2058 | 0.0098  | -0.0231 |
| 0.0657 | 1   | .   |                             |        |        |        |         |         |
| 1922   | CA  | CA  | . TYR TYR TYR A A 256 256 . | 0.1449 | 0.2055 | 0.2199 | -0.0045 | -0.0138 |
| 0.0563 | 1   | .   |                             |        |        |        |         |         |
| 1923   | CB  | CB  | . TYR TYR TYR A A 256 256 . | 0.1576 | 0.2093 | 0.2097 | -0.0202 | -0.0061 |
| 0.0331 | 1   | .   |                             |        |        |        |         |         |
| 1924   | CG  | CG  | . TYR TYR TYR A A 256 256 . | 0.1440 | 0.1806 | 0.1994 | -0.0427 | -0.0128 |
| 0.0525 | 1   | .   |                             |        |        |        |         |         |
| 1925   | CD1 | CD1 | . TYR TYR TYR A A 256 256 . | 0.1357 | 0.1798 | 0.1646 | -0.0021 | -0.0103 |
| 0.0145 | 1   | .   |                             |        |        |        |         |         |
| 1926   | CE1 | CE1 | . TYR TYR TYR A A 256 256 . | 0.1903 | 0.1700 | 0.1758 | 0.0427  | 0.0101  |
| 0.0688 | 1   | .   |                             |        |        |        |         |         |
| 1927   | CZ  | CZ  | . TYR TYR TYR A A 256 256 . | 0.0951 | 0.1384 | 0.1506 | 0.0037  | -0.0086 |
| 0.0303 | 1   | .   |                             |        |        |        |         |         |
| 1928   | OH  | OH  | . TYR TYR TYR A A 256 256 . | 0.1224 | 0.1311 | 0.1421 | 0.0117  | 0.0082  |
| 0.0274 | 1   | .   |                             |        |        |        |         |         |
| 1929   | CE2 | CE2 | . TYR TYR TYR A A 256 256 . | 0.1280 | 0.1503 | 0.2137 | 0.0239  | -0.0424 |
| 0.0463 | 1   | .   |                             |        |        |        |         |         |
| 1930   | CD2 | CD2 | . TYR TYR TYR A A 256 256 . | 0.1255 | 0.2192 | 0.1768 | -0.0050 | -0.0183 |
| 0.0670 | 1   | .   |                             |        |        |        |         |         |
| 1931   | C   | C   | . TYR TYR TYR A A 256 256 . | 0.1862 | 0.1906 | 0.1840 | -0.0181 | -0.0136 |
| 0.0405 | 1   | .   |                             |        |        |        |         |         |
| 1932   | O   | O   | . TYR TYR TYR A A 256 256 . | 0.1828 | 0.2315 | 0.2251 | -0.0150 | -0.0122 |
| 0.0533 | 1   | .   |                             |        |        |        |         |         |
| 1933   | N   | N   | . ASP ASP ASP A A 257 257 . | 0.1489 | 0.2068 | 0.1802 | 0.0100  | 0.0102  |
| 0.0402 | 1   | .   |                             |        |        |        |         |         |
| 1934   | CA  | CA  | . ASP ASP ASP A A 257 257 . | 0.1663 | 0.2008 | 0.1927 | 0.0263  | 0.0020  |
| 0.0337 | 1   | .   |                             |        |        |        |         |         |
| 1935   | CB  | CB  | . ASP ASP ASP A A 257 257 . | 0.1342 | 0.1964 | 0.2098 | 0.0011  | 0.0151  |
| 0.0300 | 1   | .   |                             |        |        |        |         |         |
| 1936   | CG  | CG  | . ASP ASP ASP A A 257 257 . | 0.1290 | 0.1846 | 0.1716 | 0.0263  | -0.0070 |
| 0.0164 | 1   | .   |                             |        |        |        |         |         |
| 1937   | OD1 | OD1 | . ASP ASP ASP A A 257 257 . | 0.1160 | 0.2222 | 0.2346 | 0.0100  | 0.0285  |
| 0.0216 | 1   | .   |                             |        |        |        |         |         |
| 1938   | OD2 | OD2 | . ASP ASP ASP A A 257 257 . | 0.1538 | 0.1986 | 0.2107 | 0.0477  | 0.0265  |
| 0.0399 | 1   | .   |                             |        |        |        |         |         |
| 1939   | C   | C   | . ASP ASP ASP A A 257 257 . | 0.1293 | 0.1852 | 0.1804 | 0.0220  | 0.0111  |
| 0.0100 | 1   | .   |                             |        |        |        |         |         |
| 1940   | O   | O   | . ASP ASP ASP A A 257 257 . | 0.1684 | 0.1693 | 0.1792 | 0.0197  | 0.0149  |
| 0.0299 | 1   | .   |                             |        |        |        |         |         |
| 1941   | N   | N   | . LEU LEU LEU A A 258 258 . | 0.1331 | 0.1658 | 0.1845 | 0.0347  | 0.0179  |
| 0.0243 | 1   | .   |                             |        |        |        |         |         |
| 1942   | CA  | CA  | . LEU LEU LEU A A 258 258 . | 0.1472 | 0.1686 | 0.1717 | 0.0367  | -0.0097 |
| 0.0203 | 1   | .   |                             |        |        |        |         |         |



|        |     |     |                             |        |        |        |         |         |   |
|--------|-----|-----|-----------------------------|--------|--------|--------|---------|---------|---|
| 1943   | CB  | CB  | . LEU LEU LEU A A 258 258 . | 0.1751 | 0.1770 | 0.1770 | 0.0064  | -0.0250 |   |
| 0.0146 | 1   | .   |                             |        |        |        |         |         |   |
| 1944   | CG  | CG  | . LEU LEU LEU A A 258 258 . | 0.1894 | 0.1735 | 0.1816 | -0.0115 | -0.0155 |   |
| 0.0144 | 1   | .   |                             |        |        |        |         |         |   |
| 1945   | CD1 | CD1 | . LEU LEU LEU A A 258 258 . | 0.2195 | 0.1960 | 0.2285 | -0.0018 | 0.0270  | - |
| 0.0202 | 1   | .   |                             |        |        |        |         |         |   |
| 1946   | CD2 | CD2 | . LEU LEU LEU A A 258 258 . | 0.1911 | 0.2265 | 0.1937 | -0.0204 | 0.0007  |   |
| 0.0380 | 1   | .   |                             |        |        |        |         |         |   |
| 1947   | C   | C   | . LEU LEU LEU A A 258 258 . | 0.1551 | 0.1712 | 0.1757 | 0.0115  | 0.0355  |   |
| 0.0290 | 1   | .   |                             |        |        |        |         |         |   |
| 1948   | O   | O   | . LEU LEU LEU A A 258 258 . | 0.1476 | 0.1720 | 0.1833 | 0.0226  | 0.0240  |   |
| 0.0359 | 1   | .   |                             |        |        |        |         |         |   |
| 1949   | N   | N   | . ASP ASP ASP A A 259 259 . | 0.1606 | 0.2166 | 0.2100 | -0.0045 | 0.0208  |   |
| 0.0287 | 1   | .   |                             |        |        |        |         |         |   |
| 1950   | CA  | CA  | . ASP ASP ASP A A 259 259 . | 0.1635 | 0.2160 | 0.1929 | -0.0041 | 0.0176  |   |
| 0.0319 | 1   | .   |                             |        |        |        |         |         |   |
| 1951   | CB  | CB  | . ASP ASP ASP A A 259 259 . | 0.1553 | 0.2214 | 0.1891 | -0.0105 | -0.0013 |   |
| 0.0014 | 1   | .   |                             |        |        |        |         |         |   |
| 1952   | CG  | CG  | . ASP ASP ASP A A 259 259 . | 0.1700 | 0.2302 | 0.2426 | -0.0147 | 0.0221  |   |
| 0.0454 | 1   | .   |                             |        |        |        |         |         |   |
| 1953   | OD1 | OD1 | . ASP ASP ASP A A 259 259 . | 0.1976 | 0.2446 | 0.2312 | -0.0061 | 0.0400  |   |
| 0.0546 | 1   | .   |                             |        |        |        |         |         |   |
| 1954   | OD2 | OD2 | . ASP ASP ASP A A 259 259 . | 0.2492 | 0.3477 | 0.3352 | -0.0495 | 0.0499  |   |
| 0.1059 | 1   | .   |                             |        |        |        |         |         |   |
| 1955   | C   | C   | . ASP ASP ASP A A 259 259 . | 0.1574 | 0.1916 | 0.1911 | -0.0082 | 0.0184  |   |
| 0.0245 | 1   | .   |                             |        |        |        |         |         |   |
| 1956   | O   | O   | . ASP ASP ASP A A 259 259 . | 0.1688 | 0.2462 | 0.2053 | -0.0087 | 0.0199  |   |
| 0.0437 | 1   | .   |                             |        |        |        |         |         |   |
| 1957   | N   | N   | . PHE PHE PHE A A 260 260 . | 0.1634 | 0.1987 | 0.2166 | -0.0023 | 0.0176  |   |
| 0.0318 | 1   | .   |                             |        |        |        |         |         |   |
| 1958   | CA  | CA  | . PHE PHE PHE A A 260 260 . | 0.1668 | 0.1886 | 0.1944 | 0.0138  | 0.0242  |   |
| 0.0143 | 1   | .   |                             |        |        |        |         |         |   |
| 1959   | CB  | CB  | . PHE PHE PHE A A 260 260 . | 0.1556 | 0.1878 | 0.2012 | 0.0090  | 0.0264  |   |
| 0.0357 | 1   | .   |                             |        |        |        |         |         |   |
| 1960   | CG  | CG  | . PHE PHE PHE A A 260 260 . | 0.1957 | 0.1686 | 0.1561 | 0.0189  | 0.0061  |   |
| 0.0275 | 1   | .   |                             |        |        |        |         |         |   |
| 1961   | CD1 | CD1 | . PHE PHE PHE A A 260 260 . | 0.1451 | 0.1652 | 0.1605 | 0.0005  | 0.0022  |   |
| 0.0341 | 1   | .   |                             |        |        |        |         |         |   |
| 1962   | CE1 | CE1 | . PHE PHE PHE A A 260 260 . | 0.1698 | 0.1602 | 0.1790 | 0.0161  | -0.0092 |   |
| 0.0460 | 1   | .   |                             |        |        |        |         |         |   |
| 1963   | CZ  | CZ  | . PHE PHE PHE A A 260 260 . | 0.1949 | 0.1626 | 0.1116 | 0.0164  | 0.0271  |   |
| 0.0258 | 1   | .   |                             |        |        |        |         |         |   |
| 1964   | CE2 | CE2 | . PHE PHE PHE A A 260 260 . | 0.1425 | 0.1935 | 0.1813 | 0.0040  | -0.0121 |   |
| 0.0059 | 1   | .   |                             |        |        |        |         |         |   |
| 1965   | CD2 | CD2 | . PHE PHE PHE A A 260 260 . | 0.1157 | 0.1850 | 0.1806 | -0.0029 | -0.0071 |   |
| 0.0422 | 1   | .   |                             |        |        |        |         |         |   |
| 1966   | C   | C   | . PHE PHE PHE A A 260 260 . | 0.2009 | 0.2025 | 0.2032 | 0.0229  | 0.0206  |   |
| 0.0112 | 1   | .   |                             |        |        |        |         |         |   |
| 1967   | O   | O   | . PHE PHE PHE A A 260 260 . | 0.2080 | 0.2073 | 0.2234 | 0.0586  | 0.0141  |   |
| 0.0002 | 1   | .   |                             |        |        |        |         |         |   |
| 1968   | N   | N   | . LYS LYS LYS A A 261 261 . | 0.2067 | 0.2312 | 0.2046 | 0.0491  | 0.0158  |   |
| 0.0190 | 1   | .   |                             |        |        |        |         |         |   |
| 1969   | CA  | CA  | . LYS LYS LYS A A 261 261 . | 0.1755 | 0.2423 | 0.2023 | 0.0528  | 0.0278  |   |
| 0.0135 | 1   | .   |                             |        |        |        |         |         |   |
| 1970   | CB  | CB  | . LYS LYS LYS A A 261 261 . | 0.1544 | 0.2366 | 0.2289 | 0.0429  | -0.0040 |   |
| 0.0162 | 1   | .   |                             |        |        |        |         |         |   |
| 1971   | CG  | CG  | . LYS LYS LYS A A 261 261 . | 0.1542 | 0.2018 | 0.2012 | 0.0387  | 0.0375  | - |
| 0.0028 | 1   | .   |                             |        |        |        |         |         |   |
| 1972   | CD  | CD  | . LYS LYS LYS A A 261 261 . | 0.1363 | 0.1491 | 0.1387 | 0.0293  | 0.0277  |   |
| 0.0099 | 1   | .   |                             |        |        |        |         |         |   |



|        |     |     |                             |        |        |        |         |         |   |
|--------|-----|-----|-----------------------------|--------|--------|--------|---------|---------|---|
| 2003   | C   | C   | . ASP ASP ASP A A 265 265 . | 0.3305 | 0.3647 | 0.3650 | 0.0245  | 0.0195  |   |
| 0.0058 | 1   | .   |                             |        |        |        |         |         |   |
| 2004   | O   | O   | . ASP ASP ASP A A 265 265 . | 0.2639 | 0.3695 | 0.3735 | 0.0364  | 0.0305  |   |
| 0.0031 | 1   | .   |                             |        |        |        |         |         |   |
| 2005   | N   | N   | . PRO PRO PRO A A 266 266 . | 0.3109 | 0.3622 | 0.3617 | 0.0308  | 0.0163  |   |
| 0.0189 | 1   | .   |                             |        |        |        |         |         |   |
| 2006   | CA  | CA  | . PRO PRO PRO A A 266 266 . | 0.2943 | 0.3619 | 0.3712 | 0.0231  | 0.0113  |   |
| 0.0209 | 1   | .   |                             |        |        |        |         |         |   |
| 2007   | CB  | CB  | . PRO PRO PRO A A 266 266 . | 0.3108 | 0.3442 | 0.3613 | 0.0240  | 0.0117  |   |
| 0.0247 | 1   | .   |                             |        |        |        |         |         |   |
| 2008   | CG  | CG  | . PRO PRO PRO A A 266 266 . | 0.3387 | 0.3551 | 0.3749 | 0.0078  | 0.0047  |   |
| 0.0274 | 1   | .   |                             |        |        |        |         |         |   |
| 2009   | CD  | CD  | . PRO PRO PRO A A 266 266 . | 0.3225 | 0.3354 | 0.3396 | 0.0263  | 0.0053  |   |
| 0.0215 | 1   | .   |                             |        |        |        |         |         |   |
| 2010   | C   | C   | . PRO PRO PRO A A 266 266 . | 0.2839 | 0.3612 | 0.3765 | 0.0321  | 0.0103  |   |
| 0.0300 | 1   | .   |                             |        |        |        |         |         |   |
| 2011   | O   | O   | . PRO PRO PRO A A 266 266 . | 0.1965 | 0.3864 | 0.3977 | 0.0317  | 0.0124  |   |
| 0.0459 | 1   | .   |                             |        |        |        |         |         |   |
| 2012   | N   | N   | . SER SER SER A A 267 267 . | 0.2478 | 0.3560 | 0.3811 | 0.0183  | 0.0200  |   |
| 0.0246 | 1   | .   |                             |        |        |        |         |         |   |
| 2013   | CA  | CA  | . SER SER SER A A 267 267 . | 0.2972 | 0.3836 | 0.3914 | 0.0120  | 0.0181  |   |
| 0.0167 | 1   | .   |                             |        |        |        |         |         |   |
| 2014   | CB  | CB  | . SER SER SER A A 267 267 . | 0.3238 | 0.4086 | 0.4087 | 0.0035  | 0.0226  |   |
| 0.0145 | 1   | .   |                             |        |        |        |         |         |   |
| 2015   | OG  | OG  | . SER SER SER A A 267 267 . | 0.3195 | 0.4060 | 0.4476 | 0.0132  | 0.0571  |   |
| 0.0508 | 1   | .   |                             |        |        |        |         |         |   |
| 2016   | C   | C   | . SER SER SER A A 267 267 . | 0.2878 | 0.3829 | 0.3776 | 0.0068  | -0.0028 |   |
| 0.0045 | 1   | .   |                             |        |        |        |         |         |   |
| 2017   | O   | O   | . SER SER SER A A 267 267 . | 0.2629 | 0.4019 | 0.3782 | 0.0159  | -0.0231 |   |
| 0.0045 | 1   | .   |                             |        |        |        |         |         |   |
| 2018   | N   | N   | . ARG ARG ARG A A 268 268 . | 0.2221 | 0.3442 | 0.3491 | -0.0137 | -0.0119 |   |
| 0.0173 | 1   | .   |                             |        |        |        |         |         |   |
| 2019   | CA  | CA  | . ARG ARG ARG A A 268 268 . | 0.2450 | 0.3157 | 0.3103 | -0.0144 | 0.0014  |   |
| 0.0202 | 1   | .   |                             |        |        |        |         |         |   |
| 2020   | CB  | CB  | . ARG ARG ARG A A 268 268 . | 0.2502 | 0.3044 | 0.3405 | -0.0008 | 0.0033  |   |
| 0.0296 | 1   | .   |                             |        |        |        |         |         |   |
| 2021   | CG  | CG  | . ARG ARG ARG A A 268 268 . | 0.2330 | 0.3585 | 0.3287 | -0.0123 | 0.0311  | - |
| 0.0249 | 1   | .   |                             |        |        |        |         |         |   |
| 2022   | CD  | CD  | . ARG ARG ARG A A 268 268 . | 0.3709 | 0.4258 | 0.4316 | 0.1325  | 0.0081  |   |
| 0.0230 | 1   | .   |                             |        |        |        |         |         |   |
| 2023   | NE  | NE  | . ARG ARG ARG A A 268 268 . | 0.3294 | 0.3701 | 0.3112 | 0.1652  | -0.0123 |   |
| 0.1041 | 1   | .   |                             |        |        |        |         |         |   |
| 2024   | CZ  | CZ  | . ARG ARG ARG A A 268 268 . | 0.2026 | 0.2841 | 0.4129 | 0.0614  | -0.0256 |   |
| 0.0343 | 1   | .   |                             |        |        |        |         |         |   |
| 2025   | NH1 | NH1 | . ARG ARG ARG A A 268 268 . | 0.1900 | 0.3037 | 0.2883 | 0.0941  | 0.0626  |   |
| 0.0578 | 1   | .   |                             |        |        |        |         |         |   |
| 2026   | NH2 | NH2 | . ARG ARG ARG A A 268 268 . | 0.2047 | 0.3143 | 0.3347 | 0.0533  | -0.0302 |   |
| 0.0866 | 1   | .   |                             |        |        |        |         |         |   |
| 2027   | C   | C   | . ARG ARG ARG A A 268 268 . | 0.2233 | 0.2878 | 0.3088 | -0.0179 | -0.0067 |   |
| 0.0191 | 1   | .   |                             |        |        |        |         |         |   |
| 2028   | O   | O   | . ARG ARG ARG A A 268 268 . | 0.2089 | 0.2985 | 0.2907 | -0.0284 | -0.0151 |   |
| 0.0241 | 1   | .   |                             |        |        |        |         |         |   |
| 2029   | N   | N   | . TYR TYR TYR A A 269 269 . | 0.1896 | 0.2837 | 0.2834 | -0.0177 | -0.0136 |   |
| 0.0226 | 1   | .   |                             |        |        |        |         |         |   |
| 2030   | CA  | CA  | . TYR TYR TYR A A 269 269 . | 0.1996 | 0.2760 | 0.2904 | 0.0004  | 0.0015  |   |
| 0.0177 | 1   | .   |                             |        |        |        |         |         |   |
| 2031   | CB  | CB  | . TYR TYR TYR A A 269 269 . | 0.1560 | 0.2702 | 0.2811 | -0.0195 | -0.0092 |   |
| 0.0253 | 1   | .   |                             |        |        |        |         |         |   |
| 2032   | CG  | CG  | . TYR TYR TYR A A 269 269 . | 0.1780 | 0.2877 | 0.2991 | 0.0267  | 0.0318  |   |
| 0.0097 | 1   | .   |                             |        |        |        |         |         |   |

|        |     |     |                             |        |        |        |         |         |
|--------|-----|-----|-----------------------------|--------|--------|--------|---------|---------|
| 2033   | CD1 | CD1 | . TYR TYR TYR A A 269 269 . | 0.1431 | 0.2503 | 0.2613 | 0.0194  | 0.0257  |
| 0.0118 | 1   | .   |                             |        |        |        |         |         |
| 2034   | CE1 | CE1 | . TYR TYR TYR A A 269 269 . | 0.1478 | 0.2770 | 0.2559 | 0.0432  | 0.0113  |
| 0.0151 | 1   | .   |                             |        |        |        |         |         |
| 2035   | CZ  | CZ  | . TYR TYR TYR A A 269 269 . | 0.1553 | 0.2855 | 0.2806 | 0.0425  | 0.0448  |
| 0.0058 | 1   | .   |                             |        |        |        |         |         |
| 2036   | OH  | OH  | . TYR TYR TYR A A 269 269 . | 0.2092 | 0.4115 | 0.2920 | 0.0145  | 0.0558  |
| 0.0044 | 1   | .   |                             |        |        |        |         |         |
| 2037   | CE2 | CE2 | . TYR TYR TYR A A 269 269 . | 0.1957 | 0.2875 | 0.2840 | 0.0002  | 0.0688  |
| 0.0346 | 1   | .   |                             |        |        |        |         |         |
| 2038   | CD2 | CD2 | . TYR TYR TYR A A 269 269 . | 0.1425 | 0.2727 | 0.3200 | -0.0084 | 0.0365  |
| 0.0177 | 1   | .   |                             |        |        |        |         |         |
| 2039   | C   | C   | . TYR TYR TYR A A 269 269 . | 0.1835 | 0.2691 | 0.2647 | -0.0127 | -0.0018 |
| 0.0272 | 1   | .   |                             |        |        |        |         |         |
| 2040   | O   | O   | . TYR TYR TYR A A 269 269 . | 0.1747 | 0.3357 | 0.3113 | -0.0193 | -0.0155 |
| 0.0002 | 1   | .   |                             |        |        |        |         |         |
| 2041   | N   | N   | . ILE ILE ILE A A 270 270 . | 0.1516 | 0.2061 | 0.2608 | 0.0022  | 0.0069  |
| 0.0204 | 1   | .   |                             |        |        |        |         |         |
| 2042   | CA  | CA  | . ILE ILE ILE A A 270 270 . | 0.1500 | 0.2145 | 0.2497 | -0.0066 | -0.0078 |
| 0.0377 | 1   | .   |                             |        |        |        |         |         |
| 2043   | CB  | CB  | . ILE ILE ILE A A 270 270 . | 0.1445 | 0.2105 | 0.2560 | -0.0096 | 0.0034  |
| 0.0412 | 1   | .   |                             |        |        |        |         |         |
| 2044   | CG1 | CG1 | . ILE ILE ILE A A 270 270 . | 0.1313 | 0.2443 | 0.2737 | 0.0175  | -0.0255 |
| 0.0197 | 1   | .   |                             |        |        |        |         |         |
| 2045   | CD  | CD  | . ILE ILE ILE A A 270 270 . | 0.2034 | 0.1981 | 0.2909 | 0.0050  | -0.0163 |
| 0.0491 | 1   | .   |                             |        |        |        |         |         |
| 2046   | CG2 | CG2 | . ILE ILE ILE A A 270 270 . | 0.1826 | 0.2189 | 0.2638 | -0.0232 | 0.0213  |
| 0.0481 | 1   | .   |                             |        |        |        |         |         |
| 2047   | C   | C   | . ILE ILE ILE A A 270 270 . | 0.2000 | 0.2142 | 0.2612 | 0.0035  | -0.0188 |
| 0.0303 | 1   | .   |                             |        |        |        |         |         |
| 2048   | O   | O   | . ILE ILE ILE A A 270 270 . | 0.1890 | 0.2195 | 0.3161 | 0.0091  | -0.0389 |
| 0.0465 | 1   | .   |                             |        |        |        |         |         |
| 2049   | N   | N   | . THR THR THR A A 271 271 . | 0.1774 | 0.2048 | 0.2302 | 0.0032  | -0.0144 |
| 0.0462 | 1   | .   |                             |        |        |        |         |         |
| 2050   | CA  | CA  | . THR THR THR A A 271 271 . | 0.1649 | 0.2445 | 0.2436 | 0.0107  | -0.0041 |
| 0.0470 | 1   | .   |                             |        |        |        |         |         |
| 2051   | CB  | CB  | . THR THR THR A A 271 271 . | 0.1816 | 0.2593 | 0.2284 | 0.0101  | -0.0005 |
| 0.0426 | 1   | .   |                             |        |        |        |         |         |
| 2052   | OG1 | OG1 | . THR THR THR A A 271 271 . | 0.1334 | 0.2930 | 0.2717 | 0.0350  | -0.0253 |
| 0.0625 | 1   | .   |                             |        |        |        |         |         |
| 2053   | CG2 | CG2 | . THR THR THR A A 271 271 . | 0.1414 | 0.2683 | 0.3310 | 0.0266  | 0.0010  |
| 0.0450 | 1   | .   |                             |        |        |        |         |         |
| 2054   | C   | C   | . THR THR THR A A 271 271 . | 0.1543 | 0.1972 | 0.2044 | 0.0197  | -0.0029 |
| 0.0208 | 1   | .   |                             |        |        |        |         |         |
| 2055   | O   | O   | . THR THR THR A A 271 271 . | 0.1653 | 0.2228 | 0.2313 | 0.0236  | -0.0211 |
| 0.0187 | 1   | .   |                             |        |        |        |         |         |
| 2056   | N   | N   | . GLY GLY GLY A A 272 272 . | 0.1516 | 0.1911 | 0.1961 | 0.0327  | -0.0156 |
| 0.0266 | 1   | .   |                             |        |        |        |         |         |
| 2057   | CA  | CA  | . GLY GLY GLY A A 272 272 . | 0.1412 | 0.1968 | 0.1988 | 0.0420  | -0.0126 |
| 0.0237 | 1   | .   |                             |        |        |        |         |         |
| 2058   | C   | C   | . GLY GLY GLY A A 272 272 . | 0.1272 | 0.1995 | 0.1752 | 0.0221  | -0.0123 |
| 0.0250 | 1   | .   |                             |        |        |        |         |         |
| 2059   | O   | O   | . GLY GLY GLY A A 272 272 . | 0.1447 | 0.1817 | 0.2064 | 0.0295  | 0.0032  |
| 0.0439 | 1   | .   |                             |        |        |        |         |         |
| 2060   | N   | N   | . ASP ASP ASP A A 273 273 . | 0.1409 | 0.2002 | 0.1868 | 0.0331  | -0.0535 |
| 0.0168 | 1   | .   |                             |        |        |        |         |         |
| 2061   | CA  | CA  | . ASP ASP ASP A A 273 273 . | 0.1609 | 0.1737 | 0.1989 | 0.0384  | -0.0452 |
| 0.0297 | 1   | .   |                             |        |        |        |         |         |
| 2062   | CB  | CB  | . ASP ASP ASP A A 273 273 . | 0.1785 | 0.1821 | 0.2053 | 0.0562  | -0.0482 |
| 0.0106 | 1   | .   |                             |        |        |        |         |         |

|        |     |     |                             |        |        |        |         |         |   |
|--------|-----|-----|-----------------------------|--------|--------|--------|---------|---------|---|
| 2063   | CG  | CG  | . ASP ASP ASP A A 273 273 . | 0.3131 | 0.2474 | 0.3035 | 0.0380  | -0.0220 |   |
| 0.0046 | 1   | .   |                             |        |        |        |         |         |   |
| 2064   | OD1 | OD1 | . ASP ASP ASP A A 273 273 . | 0.4685 | 0.5722 | 0.2992 | 0.0783  | -0.0153 | - |
| 0.0046 | 1   | .   |                             |        |        |        |         |         |   |
| 2065   | OD2 | OD2 | . ASP ASP ASP A A 273 273 . | 0.4610 | 0.3310 | 0.4083 | 0.0562  | -0.0488 | - |
| 0.0406 | 1   | .   |                             |        |        |        |         |         |   |
| 2066   | C   | C   | . ASP ASP ASP A A 273 273 . | 0.1619 | 0.1867 | 0.2135 | 0.0277  | -0.0467 |   |
| 0.0147 | 1   | .   |                             |        |        |        |         |         |   |
| 2067   | O   | O   | . ASP ASP ASP A A 273 273 . | 0.1642 | 0.1829 | 0.2463 | 0.0370  | -0.0615 | - |
| 0.0037 | 1   | .   |                             |        |        |        |         |         |   |
| 2068   | N   | N   | . GLN GLN GLN A A 274 274 . | 0.1530 | 0.1931 | 0.2424 | 0.0199  | -0.0650 |   |
| 0.0279 | 1   | .   |                             |        |        |        |         |         |   |
| 2069   | CA  | CA  | . GLN GLN GLN A A 274 274 . | 0.1836 | 0.2252 | 0.2649 | 0.0134  | -0.0325 |   |
| 0.0376 | 1   | .   |                             |        |        |        |         |         |   |
| 2070   | CB  | CB  | . GLN GLN GLN A A 274 274 . | 0.2108 | 0.2396 | 0.2647 | 0.0061  | -0.0302 |   |
| 0.0193 | 1   | .   |                             |        |        |        |         |         |   |
| 2071   | CG  | CG  | . GLN GLN GLN A A 274 274 . | 0.3055 | 0.3355 | 0.3522 | -0.0100 | -0.0080 |   |
| 0.0245 | 1   | .   |                             |        |        |        |         |         |   |
| 2072   | CD  | CD  | . GLN GLN GLN A A 274 274 . | 0.3528 | 0.3303 | 0.3843 | -0.0403 | 0.0321  | - |
| 0.0015 | 1   | .   |                             |        |        |        |         |         |   |
| 2073   | OE1 | OE1 | . GLN GLN GLN A A 274 274 . | 0.2770 | 0.3442 | 0.3851 | -0.0018 | 0.0479  | - |
| 0.0234 | 1   | .   |                             |        |        |        |         |         |   |
| 2074   | NE2 | NE2 | . GLN GLN GLN A A 274 274 . | 0.3892 | 0.3140 | 0.2980 | -0.0453 | -0.0121 |   |
| 0.0777 | 1   | .   |                             |        |        |        |         |         |   |
| 2075   | C   | C   | . GLN GLN GLN A A 274 274 . | 0.1618 | 0.1970 | 0.2405 | 0.0077  | -0.0378 |   |
| 0.0080 | 1   | .   |                             |        |        |        |         |         |   |
| 2076   | O   | O   | . GLN GLN GLN A A 274 274 . | 0.1329 | 0.2111 | 0.2804 | 0.0310  | -0.0120 |   |
| 0.0299 | 1   | .   |                             |        |        |        |         |         |   |
| 2077   | N   | N   | . LEU LEU LEU A A 275 275 . | 0.1248 | 0.1660 | 0.2125 | 0.0101  | -0.0322 |   |
| 0.0244 | 1   | .   |                             |        |        |        |         |         |   |
| 2078   | CA  | CA  | . LEU LEU LEU A A 275 275 . | 0.1248 | 0.1470 | 0.1819 | 0.0156  | -0.0434 |   |
| 0.0209 | 1   | .   |                             |        |        |        |         |         |   |
| 2079   | CB  | CB  | . LEU LEU LEU A A 275 275 . | 0.1272 | 0.1651 | 0.1641 | 0.0092  | -0.0370 |   |
| 0.0212 | 1   | .   |                             |        |        |        |         |         |   |
| 2080   | CG  | CG  | . LEU LEU LEU A A 275 275 . | 0.1343 | 0.1801 | 0.1738 | 0.0271  | -0.0633 |   |
| 0.0570 | 1   | .   |                             |        |        |        |         |         |   |
| 2081   | CD1 | CD1 | . LEU LEU LEU A A 275 275 . | 0.1982 | 0.2377 | 0.1957 | 0.0020  | -0.0616 |   |
| 0.1187 | 1   | .   |                             |        |        |        |         |         |   |
| 2082   | CD2 | CD2 | . LEU LEU LEU A A 275 275 . | 0.1861 | 0.1945 | 0.1712 | 0.0255  | -0.0381 |   |
| 0.0394 | 1   | .   |                             |        |        |        |         |         |   |
| 2083   | C   | C   | . LEU LEU LEU A A 275 275 . | 0.1310 | 0.1485 | 0.1680 | 0.0036  | -0.0332 |   |
| 0.0196 | 1   | .   |                             |        |        |        |         |         |   |
| 2084   | O   | O   | . LEU LEU LEU A A 275 275 . | 0.1225 | 0.1440 | 0.1868 | 0.0294  | -0.0241 |   |
| 0.0072 | 1   | .   |                             |        |        |        |         |         |   |
| 2085   | N   | N   | . GLY GLY GLY A A 276 276 . | 0.1298 | 0.1605 | 0.1405 | -0.0145 | -0.0177 |   |
| 0.0143 | 1   | .   |                             |        |        |        |         |         |   |
| 2086   | CA  | CA  | . GLY GLY GLY A A 276 276 . | 0.1117 | 0.1544 | 0.1444 | -0.0010 | -0.0185 |   |
| 0.0161 | 1   | .   |                             |        |        |        |         |         |   |
| 2087   | C   | C   | . GLY GLY GLY A A 276 276 . | 0.1297 | 0.1855 | 0.1674 | -0.0111 | -0.0186 |   |
| 0.0143 | 1   | .   |                             |        |        |        |         |         |   |
| 2088   | O   | O   | . GLY GLY GLY A A 276 276 . | 0.1635 | 0.1943 | 0.1768 | -0.0040 | -0.0230 |   |
| 0.0069 | 1   | .   |                             |        |        |        |         |         |   |
| 2089   | N   | N   | . ALA ALA ALA A A 277 277 . | 0.1396 | 0.1884 | 0.2100 | -0.0071 | -0.0351 |   |
| 0.0441 | 1   | .   |                             |        |        |        |         |         |   |
| 2090   | CA  | CA  | . ALA ALA ALA A A 277 277 . | 0.1403 | 0.1923 | 0.1981 | 0.0252  | -0.0417 |   |
| 0.0168 | 1   | .   |                             |        |        |        |         |         |   |
| 2091   | CB  | CB  | . ALA ALA ALA A A 277 277 . | 0.1299 | 0.1829 | 0.2210 | 0.0163  | -0.0735 |   |
| 0.0122 | 1   | .   |                             |        |        |        |         |         |   |
| 2092   | C   | C   | . ALA ALA ALA A A 277 277 . | 0.1441 | 0.1657 | 0.1791 | 0.0006  | -0.0310 |   |
| 0.0074 | 1   | .   |                             |        |        |        |         |         |   |

|        |     |     |                             |        |        |        |         |         |   |
|--------|-----|-----|-----------------------------|--------|--------|--------|---------|---------|---|
| 2093   | O   | O   | . ALA ALA ALA A A 277 277 . | 0.1761 | 0.1557 | 0.2057 | 0.0145  | -0.0461 |   |
| 0.0145 | 1   | .   |                             |        |        |        |         |         |   |
| 2094   | N   | N   | . LEU LEU LEU A A 278 278 . | 0.1617 | 0.1688 | 0.1900 | 0.0286  | -0.0088 |   |
| 0.0317 | 1   | .   |                             |        |        |        |         |         |   |
| 2095   | CA  | CA  | . LEU LEU LEU A A 278 278 . | 0.1602 | 0.1605 | 0.1758 | 0.0163  | -0.0209 |   |
| 0.0153 | 1   | .   |                             |        |        |        |         |         |   |
| 2096   | CB  | CB  | . LEU LEU LEU A A 278 278 . | 0.1846 | 0.1789 | 0.1953 | 0.0204  | -0.0074 |   |
| 0.0140 | 1   | .   |                             |        |        |        |         |         |   |
| 2097   | CG  | CG  | . LEU LEU LEU A A 278 278 . | 0.2436 | 0.2332 | 0.1723 | -0.0166 | -0.0291 |   |
| 0.0210 | 1   | .   |                             |        |        |        |         |         |   |
| 2098   | CD1 | CD1 | . LEU LEU LEU A A 278 278 . | 0.3354 | 0.2512 | 0.2882 | -0.0436 | 0.0104  |   |
| 0.0435 | 1   | .   |                             |        |        |        |         |         |   |
| 2099   | CD2 | CD2 | . LEU LEU LEU A A 278 278 . | 0.2997 | 0.2858 | 0.1939 | -0.0223 | -0.0132 | - |
| 0.0235 | 1   | .   |                             |        |        |        |         |         |   |
| 2100   | C   | C   | . LEU LEU LEU A A 278 278 . | 0.1508 | 0.1305 | 0.1631 | -0.0047 | -0.0128 |   |
| 0.0054 | 1   | .   |                             |        |        |        |         |         |   |
| 2101   | O   | O   | . LEU LEU LEU A A 278 278 . | 0.1178 | 0.1312 | 0.1619 | 0.0081  | -0.0246 | - |
| 0.0009 | 1   | .   |                             |        |        |        |         |         |   |
| 2102   | N   | N   | . TYR TYR TYR A A 279 279 . | 0.1288 | 0.1558 | 0.1223 | -0.0130 | -0.0048 |   |
| 0.0023 | 1   | .   |                             |        |        |        |         |         |   |
| 2103   | CA  | CA  | . TYR TYR TYR A A 279 279 . | 0.1112 | 0.1429 | 0.1444 | -0.0004 | -0.0077 |   |
| 0.0000 | 1   | .   |                             |        |        |        |         |         |   |
| 2104   | CB  | CB  | . TYR TYR TYR A A 279 279 . | 0.1276 | 0.1175 | 0.1530 | 0.0062  | -0.0084 | - |
| 0.0132 | 1   | .   |                             |        |        |        |         |         |   |
| 2105   | CG  | CG  | . TYR TYR TYR A A 279 279 . | 0.1062 | 0.1478 | 0.1247 | 0.0315  | -0.0182 |   |
| 0.0016 | 1   | .   |                             |        |        |        |         |         |   |
| 2106   | CD1 | CD1 | . TYR TYR TYR A A 279 279 . | 0.1049 | 0.1867 | 0.1385 | 0.0053  | -0.0247 | - |
| 0.0073 | 1   | .   |                             |        |        |        |         |         |   |
| 2107   | CE1 | CE1 | . TYR TYR TYR A A 279 279 . | 0.0905 | 0.1226 | 0.1566 | 0.0101  | -0.0172 |   |
| 0.0006 | 1   | .   |                             |        |        |        |         |         |   |
| 2108   | CZ  | CZ  | . TYR TYR TYR A A 279 279 . | 0.0881 | 0.1332 | 0.1109 | 0.0104  | -0.0193 |   |
| 0.0135 | 1   | .   |                             |        |        |        |         |         |   |
| 2109   | OH  | OH  | . TYR TYR TYR A A 279 279 . | 0.1247 | 0.1555 | 0.1283 | -0.0080 | -0.0166 | - |
| 0.0056 | 1   | .   |                             |        |        |        |         |         |   |
| 2110   | CE2 | CE2 | . TYR TYR TYR A A 279 279 . | 0.1151 | 0.1408 | 0.1184 | -0.0004 | -0.0112 |   |
| 0.0101 | 1   | .   |                             |        |        |        |         |         |   |
| 2111   | CD2 | CD2 | . TYR TYR TYR A A 279 279 . | 0.1054 | 0.1272 | 0.1665 | -0.0190 | -0.0076 | - |
| 0.0004 | 1   | .   |                             |        |        |        |         |         |   |
| 2112   | C   | C   | . TYR TYR TYR A A 279 279 . | 0.1545 | 0.1526 | 0.1597 | 0.0146  | -0.0169 |   |
| 0.0054 | 1   | .   |                             |        |        |        |         |         |   |
| 2113   | O   | O   | . TYR TYR TYR A A 279 279 . | 0.1381 | 0.1372 | 0.1385 | 0.0155  | -0.0201 |   |
| 0.0133 | 1   | .   |                             |        |        |        |         |         |   |
| 2114   | N   | N   | . GLN GLN GLN A A 280 280 . | 0.1323 | 0.1588 | 0.1277 | -0.0135 | -0.0277 | - |
| 0.0068 | 1   | .   |                             |        |        |        |         |         |   |
| 2115   | CA  | CA  | . GLN GLN GLN A A 280 280 . | 0.1542 | 0.1455 | 0.1403 | 0.0023  | -0.0451 |   |
| 0.0043 | 1   | .   |                             |        |        |        |         |         |   |
| 2116   | CB  | CB  | . GLN GLN GLN A A 280 280 . | 0.1589 | 0.1761 | 0.1680 | 0.0083  | -0.0625 |   |
| 0.0096 | 1   | .   |                             |        |        |        |         |         |   |
| 2117   | CG  | CG  | . GLN GLN GLN A A 280 280 . | 0.2620 | 0.2191 | 0.2334 | -0.0309 | -0.0358 |   |
| 0.0076 | 1   | .   |                             |        |        |        |         |         |   |
| 2118   | CD  | CD  | . GLN GLN GLN A A 280 280 . | 0.2849 | 0.2694 | 0.3125 | -0.0300 | 0.0070  | - |
| 0.0121 | 1   | .   |                             |        |        |        |         |         |   |
| 2119   | OE1 | OE1 | . GLN GLN GLN A A 280 280 . | 0.3830 | 0.2920 | 0.3384 | -0.0148 | 0.0337  | - |
| 0.0093 | 1   | .   |                             |        |        |        |         |         |   |
| 2120   | NE2 | NE2 | . GLN GLN GLN A A 280 280 . | 0.3253 | 0.3098 | 0.2794 | -0.0516 | -0.0641 |   |
| 0.0216 | 1   | .   |                             |        |        |        |         |         |   |
| 2121   | C   | C   | . GLN GLN GLN A A 280 280 . | 0.1778 | 0.1771 | 0.1549 | 0.0177  | -0.0358 |   |
| 0.0073 | 1   | .   |                             |        |        |        |         |         |   |
| 2122   | O   | O   | . GLN GLN GLN A A 280 280 . | 0.1542 | 0.1746 | 0.1259 | 0.0316  | -0.0315 | - |
| 0.0060 | 1   | .   |                             |        |        |        |         |         |   |

|        |     |     |                             |        |        |        |         |         |   |
|--------|-----|-----|-----------------------------|--------|--------|--------|---------|---------|---|
| 2123   | N   | N   | . ASP ASP ASP A A 281 281 . | 0.1295 | 0.1510 | 0.1491 | 0.0008  | -0.0447 |   |
| 0.0183 | 1   | .   |                             |        |        |        |         |         |   |
| 2124   | CA  | CA  | . ASP ASP ASP A A 281 281 . | 0.1519 | 0.1553 | 0.1767 | -0.0031 | -0.0379 |   |
| 0.0204 | 1   | .   |                             |        |        |        |         |         |   |
| 2125   | CB  | CB  | . ASP ASP ASP A A 281 281 . | 0.1708 | 0.1847 | 0.1924 | 0.0044  | -0.0449 |   |
| 0.0246 | 1   | .   |                             |        |        |        |         |         |   |
| 2126   | CG  | CG  | . ASP ASP ASP A A 281 281 . | 0.2175 | 0.2641 | 0.2646 | -0.0019 | -0.0311 |   |
| 0.0098 | 1   | .   |                             |        |        |        |         |         |   |
| 2127   | OD1 | OD1 | . ASP ASP ASP A A 281 281 . | 0.2600 | 0.3365 | 0.3222 | -0.0466 | -0.0925 | - |
| 0.0184 | 1   | .   |                             |        |        |        |         |         |   |
| 2128   | OD2 | OD2 | . ASP ASP ASP A A 281 281 . | 0.1976 | 0.3878 | 0.3688 | -0.0446 | -0.0132 |   |
| 0.0064 | 1   | .   |                             |        |        |        |         |         |   |
| 2129   | C   | C   | . ASP ASP ASP A A 281 281 . | 0.1414 | 0.1498 | 0.1331 | 0.0000  | -0.0037 |   |
| 0.0082 | 1   | .   |                             |        |        |        |         |         |   |
| 2130   | O   | O   | . ASP ASP ASP A A 281 281 . | 0.1579 | 0.1573 | 0.1827 | 0.0081  | -0.0422 |   |
| 0.0036 | 1   | .   |                             |        |        |        |         |         |   |
| 2131   | N   | N   | . PHE PHE PHE A A 282 282 . | 0.0935 | 0.1281 | 0.1540 | 0.0004  | -0.0119 |   |
| 0.0061 | 1   | .   |                             |        |        |        |         |         |   |
| 2132   | CA  | CA  | . PHE PHE PHE A A 282 282 . | 0.1011 | 0.1520 | 0.1350 | 0.0070  | -0.0222 |   |
| 0.0000 | 1   | .   |                             |        |        |        |         |         |   |
| 2133   | CB  | CB  | . PHE PHE PHE A A 282 282 . | 0.1439 | 0.1654 | 0.1466 | 0.0231  | -0.0057 | - |
| 0.0001 | 1   | .   |                             |        |        |        |         |         |   |
| 2134   | CG  | CG  | . PHE PHE PHE A A 282 282 . | 0.1266 | 0.1654 | 0.1199 | 0.0134  | -0.0397 |   |
| 0.0289 | 1   | .   |                             |        |        |        |         |         |   |
| 2135   | CD1 | CD1 | . PHE PHE PHE A A 282 282 . | 0.1490 | 0.1715 | 0.1199 | 0.0310  | -0.0307 |   |
| 0.0038 | 1   | .   |                             |        |        |        |         |         |   |
| 2136   | CE1 | CE1 | . PHE PHE PHE A A 282 282 . | 0.1667 | 0.2379 | 0.1403 | -0.0016 | -0.0466 |   |
| 0.0028 | 1   | .   |                             |        |        |        |         |         |   |
| 2137   | CZ  | CZ  | . PHE PHE PHE A A 282 282 . | 0.1507 | 0.2168 | 0.2136 | 0.0282  | -0.0541 |   |
| 0.0069 | 1   | .   |                             |        |        |        |         |         |   |
| 2138   | CE2 | CE2 | . PHE PHE PHE A A 282 282 . | 0.1999 | 0.2133 | 0.1398 | -0.0033 | -0.0221 |   |
| 0.0116 | 1   | .   |                             |        |        |        |         |         |   |
| 2139   | CD2 | CD2 | . PHE PHE PHE A A 282 282 . | 0.1486 | 0.1747 | 0.1157 | 0.0226  | -0.0145 |   |
| 0.0363 | 1   | .   |                             |        |        |        |         |         |   |
| 2140   | C   | C   | . PHE PHE PHE A A 282 282 . | 0.1319 | 0.1265 | 0.1415 | 0.0075  | -0.0099 | - |
| 0.0019 | 1   | .   |                             |        |        |        |         |         |   |
| 2141   | O   | O   | . PHE PHE PHE A A 282 282 . | 0.1293 | 0.1691 | 0.1486 | 0.0052  | -0.0310 | - |
| 0.0040 | 1   | .   |                             |        |        |        |         |         |   |
| 2142   | N   | N   | . VAL VAL VAL A A 283 283 . | 0.1061 | 0.1658 | 0.1321 | -0.0036 | -0.0165 | - |
| 0.0005 | 1   | .   |                             |        |        |        |         |         |   |
| 2143   | CA  | CA  | . VAL VAL VAL A A 283 283 . | 0.1371 | 0.1456 | 0.1385 | 0.0045  | -0.0063 |   |
| 0.0066 | 1   | .   |                             |        |        |        |         |         |   |
| 2144   | CB  | CB  | . VAL VAL VAL A A 283 283 . | 0.1655 | 0.1475 | 0.1257 | -0.0205 | -0.0018 |   |
| 0.0038 | 1   | .   |                             |        |        |        |         |         |   |
| 2145   | CG1 | CG1 | . VAL VAL VAL A A 283 283 . | 0.1953 | 0.1656 | 0.1701 | -0.0092 | 0.0295  | - |
| 0.0181 | 1   | .   |                             |        |        |        |         |         |   |
| 2146   | CG2 | CG2 | . VAL VAL VAL A A 283 283 . | 0.1599 | 0.1517 | 0.1668 | -0.0302 | -0.0484 | - |
| 0.0224 | 1   | .   |                             |        |        |        |         |         |   |
| 2147   | C   | C   | . VAL VAL VAL A A 283 283 . | 0.1526 | 0.1492 | 0.1519 | 0.0124  | -0.0166 |   |
| 0.0050 | 1   | .   |                             |        |        |        |         |         |   |
| 2148   | O   | O   | . VAL VAL VAL A A 283 283 . | 0.1544 | 0.1946 | 0.1973 | 0.0180  | -0.0379 | - |
| 0.0283 | 1   | .   |                             |        |        |        |         |         |   |
| 2149   | N   | N   | . ARG ARG ARG A A 284 284 . | 0.1541 | 0.1419 | 0.1519 | -0.0063 | -0.0111 | - |
| 0.0174 | 1   | .   |                             |        |        |        |         |         |   |
| 2150   | CA  | CA  | . ARG ARG ARG A A 284 284 . | 0.1810 | 0.1910 | 0.1759 | 0.0053  | -0.0091 | - |
| 0.0044 | 1   | .   |                             |        |        |        |         |         |   |
| 2151   | CB  | CB  | . ARG ARG ARG A A 284 284 . | 0.1868 | 0.2305 | 0.2234 | 0.0115  | -0.0026 |   |
| 0.0238 | 1   | .   |                             |        |        |        |         |         |   |
| 2152   | CG  | CG  | . ARG ARG ARG A A 284 284 . | 0.3008 | 0.2907 | 0.2640 | -0.0196 | -0.0401 |   |
| 0.0214 | 1   | .   |                             |        |        |        |         |         |   |

|        |     |     |                             |        |        |        |         |         |   |
|--------|-----|-----|-----------------------------|--------|--------|--------|---------|---------|---|
| 2153   | CD  | CD  | . ARG ARG ARG A A 284 284 . | 0.3671 | 0.2038 | 0.3680 | -0.0562 | -0.0670 | - |
| 0.0643 | 1   | .   |                             |        |        |        |         |         |   |
| 2154   | NE  | NE  | . ARG ARG ARG A A 284 284 . | 0.2841 | 0.3396 | 0.3723 | -0.0110 | -0.0753 | - |
| 0.0304 | 1   | .   |                             |        |        |        |         |         |   |
| 2155   | CZ  | CZ  | . ARG ARG ARG A A 284 284 . | 0.2998 | 0.3065 | 0.4028 | 0.0072  | -0.0519 | - |
| 0.0135 | 1   | .   |                             |        |        |        |         |         |   |
| 2156   | NH1 | NH1 | . ARG ARG ARG A A 284 284 . | 0.3176 | 0.3584 | 0.3932 | -0.0032 | -0.1083 | - |
| 0.0491 | 1   | .   |                             |        |        |        |         |         |   |
| 2157   | NH2 | NH2 | . ARG ARG ARG A A 284 284 . | 0.3249 | 0.3382 | 0.3850 | -0.0010 | -0.0767 | - |
| 0.0512 | 1   | .   |                             |        |        |        |         |         |   |
| 2158   | C   | C   | . ARG ARG ARG A A 284 284 . | 0.1911 | 0.1922 | 0.1855 | 0.0085  | -0.0022 | - |
| 0.0127 | 1   | .   |                             |        |        |        |         |         |   |
| 2159   | O   | O   | . ARG ARG ARG A A 284 284 . | 0.2162 | 0.2184 | 0.2003 | 0.0349  | -0.0050 | - |
| 0.0407 | 1   | .   |                             |        |        |        |         |         |   |
| 2160   | N   | N   | . ASP ASP ASP A A 285 285 . | 0.1734 | 0.1833 | 0.1698 | 0.0024  | -0.0191 | - |
| 0.0023 | 1   | .   |                             |        |        |        |         |         |   |
| 2161   | CA  | CA  | . ASP ASP ASP A A 285 285 . | 0.1648 | 0.1578 | 0.1681 | -0.0001 | -0.0283 | - |
| 0.0153 | 1   | .   |                             |        |        |        |         |         |   |
| 2162   | CB  | CB  | . ASP ASP ASP A A 285 285 . | 0.1423 | 0.1740 | 0.1892 | -0.0315 | -0.0437 | - |
| 0.0066 | 1   | .   |                             |        |        |        |         |         |   |
| 2163   | CG  | CG  | . ASP ASP ASP A A 285 285 . | 0.1749 | 0.2016 | 0.2227 | 0.0048  | -0.0224 | - |
| 0.0139 | 1   | .   |                             |        |        |        |         |         |   |
| 2164   | OD1 | OD1 | . ASP ASP ASP A A 285 285 . | 0.1807 | 0.2382 | 0.2461 | -0.0005 | -0.0442 | - |
| 0.0168 | 1   | .   |                             |        |        |        |         |         |   |
| 2165   | OD2 | OD2 | . ASP ASP ASP A A 285 285 . | 0.1258 | 0.2980 | 0.3236 | 0.0058  | -0.0068 | - |
| 0.0031 | 1   | .   |                             |        |        |        |         |         |   |
| 2166   | C   | C   | . ASP ASP ASP A A 285 285 . | 0.1457 | 0.1504 | 0.1947 | -0.0168 | -0.0318 | - |
| 0.0070 | 1   | .   |                             |        |        |        |         |         |   |
| 2167   | O   | O   | . ASP ASP ASP A A 285 285 . | 0.1553 | 0.1504 | 0.1989 | -0.0095 | -0.0480 | - |
| 0.0176 | 1   | .   |                             |        |        |        |         |         |   |
| 2168   | N   | N   | . TYR TYR TYR A A 286 286 . | 0.1239 | 0.1357 | 0.1614 | -0.0237 | -0.0314 | - |
| 0.0061 | 1   | .   |                             |        |        |        |         |         |   |
| 2169   | CA  | CA  | . TYR TYR TYR A A 286 286 . | 0.1440 | 0.1494 | 0.1536 | -0.0134 | -0.0257 | - |
| 0.0119 | 1   | .   |                             |        |        |        |         |         |   |
| 2170   | CB  | CB  | . TYR TYR TYR A A 286 286 . | 0.1470 | 0.1457 | 0.1427 | -0.0118 | -0.0212 | - |
| 0.0318 | 1   | .   |                             |        |        |        |         |         |   |
| 2171   | CG  | CG  | . TYR TYR TYR A A 286 286 . | 0.1619 | 0.1297 | 0.1486 | -0.0286 | -0.0373 | - |
| 0.0100 | 1   | .   |                             |        |        |        |         |         |   |
| 2172   | CD1 | CD1 | . TYR TYR TYR A A 286 286 . | 0.1975 | 0.1576 | 0.2038 | -0.0526 | -0.0186 | - |
| 0.0058 | 1   | .   |                             |        |        |        |         |         |   |
| 2173   | CE1 | CE1 | . TYR TYR TYR A A 286 286 . | 0.2771 | 0.2542 | 0.2193 | -0.0731 | 0.0503  | - |
| 0.0070 | 1   | .   |                             |        |        |        |         |         |   |
| 2174   | CZ  | CZ  | . TYR TYR TYR A A 286 286 . | 0.2461 | 0.2842 | 0.2033 | -0.0973 | 0.0148  | - |
| 0.0193 | 1   | .   |                             |        |        |        |         |         |   |
| 2175   | OH  | OH  | . TYR TYR TYR A A 286 286 . | 0.3585 | 0.4340 | 0.2758 | -0.1688 | 0.0470  | - |
| 0.0469 | 1   | .   |                             |        |        |        |         |         |   |
| 2176   | CE2 | CE2 | . TYR TYR TYR A A 286 286 . | 0.2109 | 0.2975 | 0.1954 | -0.0606 | -0.0090 | - |
| 0.0205 | 1   | .   |                             |        |        |        |         |         |   |
| 2177   | CD2 | CD2 | . TYR TYR TYR A A 286 286 . | 0.1704 | 0.2248 | 0.1752 | -0.0242 | 0.0348  | - |
| 0.0071 | 1   | .   |                             |        |        |        |         |         |   |
| 2178   | C   | C   | . TYR TYR TYR A A 286 286 . | 0.1373 | 0.1010 | 0.1370 | -0.0019 | -0.0148 | - |
| 0.0270 | 1   | .   |                             |        |        |        |         |         |   |
| 2179   | O   | O   | . TYR TYR TYR A A 286 286 . | 0.1553 | 0.1334 | 0.1462 | -0.0105 | -0.0031 | - |
| 0.0027 | 1   | .   |                             |        |        |        |         |         |   |
| 2180   | N   | N   | . PRO PRO PRO A A 287 287 . | 0.1517 | 0.1212 | 0.1619 | 0.0130  | -0.0221 | - |
| 0.0026 | 1   | .   |                             |        |        |        |         |         |   |
| 2181   | CA  | CA  | . PRO PRO PRO A A 287 287 . | 0.1218 | 0.0980 | 0.1290 | 0.0094  | -0.0145 | - |
| 0.0010 | 1   | .   |                             |        |        |        |         |         |   |
| 2182   | CB  | CB  | . PRO PRO PRO A A 287 287 . | 0.1219 | 0.1667 | 0.1728 | 0.0153  | -0.0020 | - |
| 0.0155 | 1   | .   |                             |        |        |        |         |         |   |



|        |     |     |                             |        |        |        |         |         |   |
|--------|-----|-----|-----------------------------|--------|--------|--------|---------|---------|---|
| 2183   | CG  | CG  | . PRO PRO PRO A A 287 287 . | 0.1433 | 0.1655 | 0.1827 | -0.0017 | -0.0145 |   |
| 0.0195 | 1   | .   |                             |        |        |        |         |         |   |
| 2184   | CD  | CD  | . PRO PRO PRO A A 287 287 . | 0.1693 | 0.1180 | 0.1856 | 0.0056  | -0.0364 |   |
| 0.0192 | 1   | .   |                             |        |        |        |         |         |   |
| 2185   | C   | C   | . PRO PRO PRO A A 287 287 . | 0.1374 | 0.1325 | 0.1258 | 0.0135  | 0.0044  | - |
| 0.0214 | 1   | .   |                             |        |        |        |         |         |   |
| 2186   | O   | O   | . PRO PRO PRO A A 287 287 . | 0.1187 | 0.1383 | 0.1263 | 0.0006  | -0.0017 | - |
| 0.0018 | 1   | .   |                             |        |        |        |         |         |   |
| 2187   | N   | N   | . VAL VAL VAL A A 288 288 . | 0.1162 | 0.1278 | 0.1243 | 0.0013  | -0.0059 | - |
| 0.0038 | 1   | .   |                             |        |        |        |         |         |   |
| 2188   | CA  | CA  | . VAL VAL VAL A A 288 288 . | 0.1151 | 0.1231 | 0.1274 | -0.0121 | 0.0044  | - |
| 0.0054 | 1   | .   |                             |        |        |        |         |         |   |
| 2189   | CB  | CB  | . VAL VAL VAL A A 288 288 . | 0.1099 | 0.1261 | 0.1337 | 0.0065  | 0.0006  | - |
| 0.0051 | 1   | .   |                             |        |        |        |         |         |   |
| 2190   | CG1 | CG1 | . VAL VAL VAL A A 288 288 . | 0.1457 | 0.0967 | 0.1529 | -0.0382 | -0.0344 | - |
| 0.0191 | 1   | .   |                             |        |        |        |         |         |   |
| 2191   | CG2 | CG2 | . VAL VAL VAL A A 288 288 . | 0.1140 | 0.1378 | 0.1423 | -0.0164 | -0.0228 | - |
| 0.0295 | 1   | .   |                             |        |        |        |         |         |   |
| 2192   | C   | C   | . VAL VAL VAL A A 288 288 . | 0.1314 | 0.1180 | 0.1213 | -0.0161 | -0.0171 | - |
| 0.0151 | 1   | .   |                             |        |        |        |         |         |   |
| 2193   | O   | O   | . VAL VAL VAL A A 288 288 . | 0.1833 | 0.1594 | 0.1146 | -0.0198 | -0.0389 | - |
| 0.0001 | 1   | .   |                             |        |        |        |         |         |   |
| 2194   | N   | N   | . VAL VAL VAL A A 289 289 . | 0.1179 | 0.1087 | 0.0970 | -0.0275 | -0.0160 | - |
| 0.0069 | 1   | .   |                             |        |        |        |         |         |   |
| 2195   | CA  | CA  | . VAL VAL VAL A A 289 289 . | 0.1233 | 0.1310 | 0.1150 | -0.0019 | 0.0068  | - |
| 0.0043 | 1   | .   |                             |        |        |        |         |         |   |
| 2196   | CB  | CB  | . VAL VAL VAL A A 289 289 . | 0.1319 | 0.1248 | 0.1068 | -0.0129 | 0.0101  | - |
| 0.0215 | 1   | .   |                             |        |        |        |         |         |   |
| 2197   | CG1 | CG1 | . VAL VAL VAL A A 289 289 . | 0.1900 | 0.1199 | 0.1234 | 0.0024  | 0.0341  | - |
| 0.0159 | 1   | .   |                             |        |        |        |         |         |   |
| 2198   | CG2 | CG2 | . VAL VAL VAL A A 289 289 . | 0.1142 | 0.1459 | 0.1520 | -0.0276 | -0.0213 | - |
| 0.0096 | 1   | .   |                             |        |        |        |         |         |   |
| 2199   | C   | C   | . VAL VAL VAL A A 289 289 . | 0.1213 | 0.1190 | 0.1145 | -0.0168 | 0.0026  | - |
| 0.0050 | 1   | .   |                             |        |        |        |         |         |   |
| 2200   | O   | O   | . VAL VAL VAL A A 289 289 . | 0.1597 | 0.1072 | 0.1182 | 0.0020  | 0.0058  | - |
| 0.0238 | 1   | .   |                             |        |        |        |         |         |   |
| 2201   | N   | N   | . SER SER SER A A 290 290 . | 0.1050 | 0.1046 | 0.0919 | 0.0015  | -0.0113 | - |
| 0.0054 | 1   | .   |                             |        |        |        |         |         |   |
| 2202   | CA  | CA  | . SER SER SER A A 290 290 . | 0.1186 | 0.1166 | 0.1144 | 0.0016  | -0.0177 | - |
| 0.0014 | 1   | .   |                             |        |        |        |         |         |   |
| 2203   | CB  | CB  | . SER SER SER A A 290 290 . | 0.1151 | 0.1225 | 0.1055 | -0.0035 | -0.0205 | - |
| 0.0001 | 1   | .   |                             |        |        |        |         |         |   |
| 2204   | OG  | OG  | . SER SER SER A A 290 290 . | 0.1258 | 0.1111 | 0.1238 | -0.0044 | -0.0101 | - |
| 0.0105 | 1   | .   |                             |        |        |        |         |         |   |
| 2205   | C   | C   | . SER SER SER A A 290 290 . | 0.1203 | 0.0988 | 0.1088 | 0.0030  | -0.0012 | - |
| 0.0081 | 1   | .   |                             |        |        |        |         |         |   |
| 2206   | O   | O   | . SER SER SER A A 290 290 . | 0.1146 | 0.1186 | 0.1030 | 0.0011  | -0.0066 | - |
| 0.0242 | 1   | .   |                             |        |        |        |         |         |   |
| 2207   | N   | N   | . ILE ILE ILE A A 291 291 . | 0.1031 | 0.0958 | 0.0788 | 0.0101  | -0.0273 | - |
| 0.0016 | 1   | .   |                             |        |        |        |         |         |   |
| 2208   | CA  | CA  | . ILE ILE ILE A A 291 291 . | 0.0641 | 0.0804 | 0.0952 | 0.0050  | -0.0195 | - |
| 0.0149 | 1   | .   |                             |        |        |        |         |         |   |
| 2209   | CB  | CB  | . ILE ILE ILE A A 291 291 . | 0.0741 | 0.0917 | 0.1010 | -0.0059 | -0.0026 | - |
| 0.0097 | 1   | .   |                             |        |        |        |         |         |   |
| 2210   | CG1 | CG1 | . ILE ILE ILE A A 291 291 . | 0.1051 | 0.1060 | 0.1574 | -0.0219 | -0.0270 | - |
| 0.0260 | 1   | .   |                             |        |        |        |         |         |   |
| 2211   | CD  | CD  | . ILE ILE ILE A A 291 291 . | 0.1281 | 0.2027 | 0.1321 | -0.0163 | -0.0474 | - |
| 0.0248 | 1   | .   |                             |        |        |        |         |         |   |
| 2212   | CG2 | CG2 | . ILE ILE ILE A A 291 291 . | 0.1505 | 0.1365 | 0.1199 | 0.0159  | 0.0236  | - |
| 0.0036 | 1   | .   |                             |        |        |        |         |         |   |

|        |     |     |                             |        |        |        |         |         |   |
|--------|-----|-----|-----------------------------|--------|--------|--------|---------|---------|---|
| 2213   | C   | C   | . ILE ILE ILE A A 291 291 . | 0.1010 | 0.0957 | 0.0733 | 0.0118  | -0.0059 |   |
| 0.0101 | 1   | .   |                             |        |        |        |         |         |   |
| 2214   | O   | O   | . ILE ILE ILE A A 291 291 . | 0.1154 | 0.1067 | 0.1056 | 0.0032  | -0.0144 |   |
| 0.0190 | 1   | .   |                             |        |        |        |         |         |   |
| 2215   | N   | N   | . GLU GLU GLU A A 292 292 . | 0.0891 | 0.1044 | 0.0848 | 0.0019  | -0.0042 | - |
| 0.0104 | 1   | .   |                             |        |        |        |         |         |   |
| 2216   | CA  | CA  | . GLU GLU GLU A A 292 292 . | 0.0925 | 0.1142 | 0.0855 | 0.0192  | -0.0246 | - |
| 0.0141 | 1   | .   |                             |        |        |        |         |         |   |
| 2217   | CB  | CB  | . GLU GLU GLU A A 292 292 . | 0.0779 | 0.0864 | 0.0904 | 0.0005  | -0.0238 |   |
| 0.0040 | 1   | .   |                             |        |        |        |         |         |   |
| 2218   | CG  | CG  | . GLU GLU GLU A A 292 292 . | 0.1201 | 0.0726 | 0.0719 | 0.0073  | -0.0329 | - |
| 0.0030 | 1   | .   |                             |        |        |        |         |         |   |
| 2219   | CD  | CD  | . GLU GLU GLU A A 292 292 . | 0.1050 | 0.0873 | 0.0808 | 0.0102  | -0.0195 | - |
| 0.0030 | 1   | .   |                             |        |        |        |         |         |   |
| 2220   | OE1 | OE1 | . GLU GLU GLU A A 292 292 . | 0.1220 | 0.0988 | 0.1197 | 0.0088  | -0.0142 |   |
| 0.0034 | 1   | .   |                             |        |        |        |         |         |   |
| 2221   | OE2 | OE2 | . GLU GLU GLU A A 292 292 . | 0.1211 | 0.1189 | 0.1211 | 0.0056  | -0.0180 | - |
| 0.0027 | 1   | .   |                             |        |        |        |         |         |   |
| 2222   | C   | C   | . GLU GLU GLU A A 292 292 . | 0.0919 | 0.1100 | 0.0891 | 0.0034  | -0.0147 |   |
| 0.0119 | 1   | .   |                             |        |        |        |         |         |   |
| 2223   | O   | O   | . GLU GLU GLU A A 292 292 . | 0.0969 | 0.1055 | 0.0963 | 0.0062  | -0.0091 |   |
| 0.0185 | 1   | .   |                             |        |        |        |         |         |   |
| 2224   | N   | N   | . ASP ASP ASP A A 293 293 . | 0.1041 | 0.1054 | 0.1140 | 0.0191  | -0.0209 |   |
| 0.0023 | 1   | .   |                             |        |        |        |         |         |   |
| 2225   | CA  | CA  | . ASP ASP ASP A A 293 293 . | 0.0941 | 0.1159 | 0.0840 | 0.0001  | -0.0027 | - |
| 0.0034 | 1   | .   |                             |        |        |        |         |         |   |
| 2226   | CB  | CB  | . ASP ASP ASP A A 293 293 . | 0.1120 | 0.1186 | 0.1017 | -0.0109 | -0.0266 |   |
| 0.0008 | 1   | .   |                             |        |        |        |         |         |   |
| 2227   | CG  | CG  | . ASP ASP ASP A A 293 293 . | 0.1023 | 0.0890 | 0.0977 | 0.0022  | -0.0126 |   |
| 0.0176 | 1   | .   |                             |        |        |        |         |         |   |
| 2228   | OD1 | OD1 | . ASP ASP ASP A A 293 293 . | 0.1200 | 0.1132 | 0.1027 | -0.0152 | -0.0017 |   |
| 0.0401 | 1   | .   |                             |        |        |        |         |         |   |
| 2229   | OD2 | OD2 | . ASP ASP ASP A A 293 293 . | 0.1061 | 0.1178 | 0.1069 | 0.0081  | -0.0176 |   |
| 0.0029 | 1   | .   |                             |        |        |        |         |         |   |
| 2230   | C   | C   | . ASP ASP ASP A A 293 293 . | 0.0832 | 0.1173 | 0.0857 | -0.0043 | -0.0122 |   |
| 0.0048 | 1   | .   |                             |        |        |        |         |         |   |
| 2231   | O   | O   | . ASP ASP ASP A A 293 293 . | 0.0974 | 0.1209 | 0.0918 | -0.0017 | -0.0235 |   |
| 0.0112 | 1   | .   |                             |        |        |        |         |         |   |
| 2232   | N   | N   | . PRO PRO PRO A A 294 294 . | 0.0828 | 0.1079 | 0.0719 | -0.0056 | -0.0138 |   |
| 0.0004 | 1   | .   |                             |        |        |        |         |         |   |
| 2233   | CA  | CA  | . PRO PRO PRO A A 294 294 . | 0.1043 | 0.1252 | 0.1208 | 0.0007  | -0.0191 | - |
| 0.0018 | 1   | .   |                             |        |        |        |         |         |   |
| 2234   | CB  | CB  | . PRO PRO PRO A A 294 294 . | 0.1286 | 0.1333 | 0.1272 | -0.0120 | -0.0224 |   |
| 0.0083 | 1   | .   |                             |        |        |        |         |         |   |
| 2235   | CG  | CG  | . PRO PRO PRO A A 294 294 . | 0.1305 | 0.1606 | 0.1159 | 0.0000  | -0.0444 |   |
| 0.0173 | 1   | .   |                             |        |        |        |         |         |   |
| 2236   | CD  | CD  | . PRO PRO PRO A A 294 294 . | 0.0781 | 0.1404 | 0.0857 | -0.0154 | -0.0112 | - |
| 0.0005 | 1   | .   |                             |        |        |        |         |         |   |
| 2237   | C   | C   | . PRO PRO PRO A A 294 294 . | 0.0953 | 0.1063 | 0.0897 | -0.0066 | -0.0367 |   |
| 0.0148 | 1   | .   |                             |        |        |        |         |         |   |
| 2238   | O   | O   | . PRO PRO PRO A A 294 294 . | 0.0907 | 0.1227 | 0.1483 | 0.0129  | -0.0006 |   |
| 0.0194 | 1   | .   |                             |        |        |        |         |         |   |
| 2239   | N   | N   | . PHE PHE PHE A A 295 295 . | 0.1100 | 0.1102 | 0.1088 | 0.0192  | -0.0192 |   |
| 0.0056 | 1   | .   |                             |        |        |        |         |         |   |
| 2240   | CA  | CA  | . PHE PHE PHE A A 295 295 . | 0.1111 | 0.1101 | 0.1081 | 0.0015  | -0.0146 |   |
| 0.0063 | 1   | .   |                             |        |        |        |         |         |   |
| 2241   | CB  | CB  | . PHE PHE PHE A A 295 295 . | 0.1271 | 0.1198 | 0.1039 | -0.0113 | -0.0338 |   |
| 0.0050 | 1   | .   |                             |        |        |        |         |         |   |
| 2242   | CG  | CG  | . PHE PHE PHE A A 295 295 . | 0.1201 | 0.1276 | 0.1086 | 0.0073  | -0.0200 | - |
| 0.0055 | 1   | .   |                             |        |        |        |         |         |   |



|        |     |     |                             |        |        |        |         |         |
|--------|-----|-----|-----------------------------|--------|--------|--------|---------|---------|
| 2273   | C   | C   | . ASP ASP ASP A A 298 298 . | 0.1428 | 0.1354 | 0.1685 | 0.0134  | -0.0396 |
| 0.0194 | 1   | .   |                             |        |        |        |         |         |
| 2274   | O   | O   | . ASP ASP ASP A A 298 298 . | 0.1817 | 0.1629 | 0.1623 | 0.0306  | -0.0511 |
| 0.0177 | 1   | .   |                             |        |        |        |         |         |
| 2275   | N   | N   | . ASP ASP ASP A A 299 299 . | 0.1367 | 0.1344 | 0.1354 | -0.0067 | -0.0405 |
| 0.0147 | 1   | .   |                             |        |        |        |         |         |
| 2276   | CA  | CA  | . ASP ASP ASP A A 299 299 . | 0.1198 | 0.1541 | 0.1438 | -0.0058 | -0.0278 |
| 0.0211 | 1   | .   |                             |        |        |        |         |         |
| 2277   | CB  | CB  | . ASP ASP ASP A A 299 299 . | 0.0953 | 0.1411 | 0.1378 | -0.0155 | -0.0218 |
| 0.0192 | 1   | .   |                             |        |        |        |         |         |
| 2278   | CG  | CG  | . ASP ASP ASP A A 299 299 . | 0.1296 | 0.1735 | 0.1352 | -0.0132 | -0.0253 |
| 0.0370 | 1   | .   |                             |        |        |        |         |         |
| 2279   | OD1 | OD1 | . ASP ASP ASP A A 299 299 . | 0.1761 | 0.2064 | 0.1929 | 0.0462  | -0.0439 |
| 0.0572 | 1   | .   |                             |        |        |        |         |         |
| 2280   | OD2 | OD2 | . ASP ASP ASP A A 299 299 . | 0.1559 | 0.1789 | 0.1777 | 0.0133  | -0.0127 |
| 0.0383 | 1   | .   |                             |        |        |        |         |         |
| 2281   | C   | C   | . ASP ASP ASP A A 299 299 . | 0.1196 | 0.1558 | 0.1343 | 0.0054  | -0.0491 |
| 0.0178 | 1   | .   |                             |        |        |        |         |         |
| 2282   | O   | O   | . ASP ASP ASP A A 299 299 . | 0.1248 | 0.1588 | 0.1665 | 0.0067  | -0.0293 |
| 0.0034 | 1   | .   |                             |        |        |        |         |         |
| 2283   | N   | N   | . TRP TRP TRP A A 300 300 . | 0.1252 | 0.1494 | 0.1517 | 0.0108  | -0.0392 |
| 0.0391 | 1   | .   |                             |        |        |        |         |         |
| 2284   | CA  | CA  | . TRP TRP TRP A A 300 300 . | 0.1510 | 0.1628 | 0.1538 | 0.0001  | -0.0112 |
| 0.0273 | 1   | .   |                             |        |        |        |         |         |
| 2285   | CB  | CB  | . TRP TRP TRP A A 300 300 . | 0.1549 | 0.1477 | 0.1584 | -0.0020 | -0.0139 |
| 0.0322 | 1   | .   |                             |        |        |        |         |         |
| 2286   | CG  | CG  | . TRP TRP TRP A A 300 300 . | 0.1976 | 0.1492 | 0.1716 | -0.0111 | -0.0015 |
| 0.0395 | 1   | .   |                             |        |        |        |         |         |
| 2287   | CD1 | CD1 | . TRP TRP TRP A A 300 300 . | 0.1956 | 0.1798 | 0.1689 | -0.0016 | -0.0022 |
| 0.0406 | 1   | .   |                             |        |        |        |         |         |
| 2288   | NE1 | NE1 | . TRP TRP TRP A A 300 300 . | 0.1785 | 0.2113 | 0.2224 | 0.0224  | -0.0005 |
| 0.0045 | 1   | .   |                             |        |        |        |         |         |
| 2289   | CE2 | CE2 | . TRP TRP TRP A A 300 300 . | 0.1640 | 0.1447 | 0.1466 | 0.0023  | 0.0150  |
| 0.0177 | 1   | .   |                             |        |        |        |         |         |
| 2290   | CD2 | CD2 | . TRP TRP TRP A A 300 300 . | 0.1859 | 0.1778 | 0.1318 | 0.0011  | -0.0043 |
| 0.0352 | 1   | .   |                             |        |        |        |         |         |
| 2291   | CE3 | CE3 | . TRP TRP TRP A A 300 300 . | 0.1356 | 0.1826 | 0.1713 | 0.0096  | -0.0097 |
| 0.0277 | 1   | .   |                             |        |        |        |         |         |
| 2292   | CZ3 | CZ3 | . TRP TRP TRP A A 300 300 . | 0.1871 | 0.1788 | 0.1769 | -0.0019 | -0.0161 |
| 0.0155 | 1   | .   |                             |        |        |        |         |         |
| 2293   | CH2 | CH2 | . TRP TRP TRP A A 300 300 . | 0.1619 | 0.1245 | 0.1637 | -0.0270 | 0.0019  |
| 0.0445 | 1   | .   |                             |        |        |        |         |         |
| 2294   | CZ2 | CZ2 | . TRP TRP TRP A A 300 300 . | 0.1799 | 0.1600 | 0.1633 | 0.0033  | 0.0206  |
| 0.0230 | 1   | .   |                             |        |        |        |         |         |
| 2295   | C   | C   | . TRP TRP TRP A A 300 300 . | 0.1401 | 0.1619 | 0.1457 | 0.0067  | -0.0003 |
| 0.0073 | 1   | .   |                             |        |        |        |         |         |
| 2296   | O   | O   | . TRP TRP TRP A A 300 300 . | 0.1600 | 0.1518 | 0.1460 | 0.0056  | -0.0152 |
| 0.0242 | 1   | .   |                             |        |        |        |         |         |
| 2297   | N   | N   | . ALA ALA ALA A A 301 301 . | 0.1461 | 0.1658 | 0.1338 | -0.0040 | -0.0204 |
| 0.0080 | 1   | .   |                             |        |        |        |         |         |
| 2298   | CA  | CA  | . ALA ALA ALA A A 301 301 . | 0.1372 | 0.1821 | 0.1527 | 0.0033  | -0.0148 |
| 0.0088 | 1   | .   |                             |        |        |        |         |         |
| 2299   | CB  | CB  | . ALA ALA ALA A A 301 301 . | 0.1515 | 0.2061 | 0.2386 | 0.0227  | -0.0307 |
| 0.0002 | 1   | .   |                             |        |        |        |         |         |
| 2300   | C   | C   | . ALA ALA ALA A A 301 301 . | 0.1110 | 0.1652 | 0.1595 | 0.0019  | -0.0094 |
| 0.0070 | 1   | .   |                             |        |        |        |         |         |
| 2301   | O   | O   | . ALA ALA ALA A A 301 301 . | 0.1145 | 0.1949 | 0.1448 | 0.0275  | -0.0251 |
| 0.0011 | 1   | .   |                             |        |        |        |         |         |
| 2302   | N   | N   | . ALA ALA ALA A A 302 302 . | 0.1039 | 0.1670 | 0.1609 | 0.0156  | -0.0165 |
| 0.0156 | 1   | .   |                             |        |        |        |         |         |

|        |     |     |                   |         |                                |           |
|--------|-----|-----|-------------------|---------|--------------------------------|-----------|
| 2303   | CA  | CA  | . ALA ALA ALA A A | 302 302 | . 0.0985 0.1559 0.1404 0.0091  | -0.0028   |
| 0.0019 | 1   | .   |                   |         |                                |           |
| 2304   | CB  | CB  | . ALA ALA ALA A A | 302 302 | . 0.1370 0.2047 0.1353 0.0381  | -0.0217   |
| 0.0304 | 1   | .   |                   |         |                                |           |
| 2305   | C   | C   | . ALA ALA ALA A A | 302 302 | . 0.1098 0.1376 0.1283 0.0112  | -0.0052 - |
| 0.0102 | 1   | .   |                   |         |                                |           |
| 2306   | O   | O   | . ALA ALA ALA A A | 302 302 | . 0.1264 0.1688 0.1392 0.0191  | -0.0383 - |
| 0.0099 | 1   | .   |                   |         |                                |           |
| 2307   | N   | N   | . TRP TRP TRP A A | 303 303 | . 0.1461 0.1733 0.1146 0.0025  | -0.0260 - |
| 0.0077 | 1   | .   |                   |         |                                |           |
| 2308   | CA  | CA  | . TRP TRP TRP A A | 303 303 | . 0.1439 0.1403 0.1344 0.0005  | -0.0054 - |
| 0.0087 | 1   | .   |                   |         |                                |           |
| 2309   | CB  | CB  | . TRP TRP TRP A A | 303 303 | . 0.1142 0.1511 0.1199 0.0103  | -0.0153   |
| 0.0230 | 1   | .   |                   |         |                                |           |
| 2310   | CG  | CG  | . TRP TRP TRP A A | 303 303 | . 0.1249 0.1357 0.1304 0.0087  | -0.0219   |
| 0.0019 | 1   | .   |                   |         |                                |           |
| 2311   | CD1 | CD1 | . TRP TRP TRP A A | 303 303 | . 0.1552 0.1509 0.0918 -0.0159 | -0.0094   |
| 0.0162 | 1   | .   |                   |         |                                |           |
| 2312   | NE1 | NE1 | . TRP TRP TRP A A | 303 303 | . 0.1279 0.1253 0.1122 0.0167  | -0.0091   |
| 0.0216 | 1   | .   |                   |         |                                |           |
| 2313   | CE2 | CE2 | . TRP TRP TRP A A | 303 303 | . 0.0852 0.0918 0.0957 0.0317  | -0.0052   |
| 0.0198 | 1   | .   |                   |         |                                |           |
| 2314   | CD2 | CD2 | . TRP TRP TRP A A | 303 303 | . 0.1129 0.1378 0.1297 0.0353  | -0.0031   |
| 0.0230 | 1   | .   |                   |         |                                |           |
| 2315   | CE3 | CE3 | . TRP TRP TRP A A | 303 303 | . 0.0921 0.1136 0.1216 0.0051  | -0.0191   |
| 0.0003 | 1   | .   |                   |         |                                |           |
| 2316   | CZ3 | CZ3 | . TRP TRP TRP A A | 303 303 | . 0.0800 0.1013 0.0832 0.0050  | -0.0074   |
| 0.0022 | 1   | .   |                   |         |                                |           |
| 2317   | CH2 | CH2 | . TRP TRP TRP A A | 303 303 | . 0.1082 0.1184 0.0937 -0.0310 | 0.0088    |
| 0.0143 | 1   | .   |                   |         |                                |           |
| 2318   | CZ2 | CZ2 | . TRP TRP TRP A A | 303 303 | . 0.0931 0.0859 0.1023 0.0147  | -0.0156   |
| 0.0235 | 1   | .   |                   |         |                                |           |
| 2319   | C   | C   | . TRP TRP TRP A A | 303 303 | . 0.1484 0.1385 0.1308 0.0221  | -0.0143   |
| 0.0227 | 1   | .   |                   |         |                                |           |
| 2320   | O   | O   | . TRP TRP TRP A A | 303 303 | . 0.1525 0.1588 0.1150 0.0191  | -0.0209   |
| 0.0137 | 1   | .   |                   |         |                                |           |
| 2321   | N   | N   | . SER SER SER A A | 304 304 | . 0.1336 0.1694 0.1239 0.0133  | -0.0190   |
| 0.0261 | 1   | .   |                   |         |                                |           |
| 2322   | CA  | CA  | . SER SER SER A A | 304 304 | . 0.1608 0.1884 0.1553 0.0240  | -0.0066   |
| 0.0157 | 1   | .   |                   |         |                                |           |
| 2323   | CB  | CB  | . SER SER SER A A | 304 304 | . 0.2188 0.1646 0.1592 0.0119  | -0.0141   |
| 0.0258 | 1   | .   |                   |         |                                |           |
| 2324   | OG  | OG  | . SER SER SER A A | 304 304 | . 0.2268 0.2463 0.2043 0.0339  | -0.0233   |
| 0.0441 | 1   | .   |                   |         |                                |           |
| 2325   | C   | C   | . SER SER SER A A | 304 304 | . 0.1659 0.1743 0.1433 0.0252  | -0.0173   |
| 0.0133 | 1   | .   |                   |         |                                |           |
| 2326   | O   | O   | . SER SER SER A A | 304 304 | . 0.1879 0.2015 0.1624 0.0131  | -0.0348   |
| 0.0083 | 1   | .   |                   |         |                                |           |
| 2327   | N   | N   | . LYS LYS LYS A A | 305 305 | . 0.1672 0.1926 0.1323 0.0140  | -0.0460   |
| 0.0301 | 1   | .   |                   |         |                                |           |
| 2328   | CA  | CA  | . LYS LYS LYS A A | 305 305 | . 0.1627 0.1970 0.1659 -0.0016 | -0.0279   |
| 0.0115 | 1   | .   |                   |         |                                |           |
| 2329   | CB  | CB  | . LYS LYS LYS A A | 305 305 | . 0.1792 0.2502 0.2145 -0.0059 | -0.0326   |
| 0.0072 | 1   | .   |                   |         |                                |           |
| 2330   | CG  | CG  | . LYS LYS LYS A A | 305 305 | . 0.2582 0.3176 0.2548 -0.0186 | -0.0408   |
| 0.0112 | 1   | .   |                   |         |                                |           |
| 2331   | CD  | CD  | . LYS LYS LYS A A | 305 305 | . 0.3078 0.4531 0.4078 0.0346  | -0.0598   |
| 0.0024 | 1   | .   |                   |         |                                |           |
| 2332   | CE  | CE  | . LYS LYS LYS A A | 305 305 | . 0.4798 0.4562 0.4504 0.0142  | -0.0517   |
| 0.0614 | 1   | .   |                   |         |                                |           |



|        |     |     |                             |        |        |        |         |         |   |
|--------|-----|-----|-----------------------------|--------|--------|--------|---------|---------|---|
| 2363   | OD1 | OD1 | . ASN ASN ASN A A 309 309 . | 0.3919 | 0.3986 | 0.4154 | 0.0284  | -0.1722 |   |
| 0.0082 | 1   | .   |                             |        |        |        |         |         |   |
| 2364   | ND2 | ND2 | . ASN ASN ASN A A 309 309 . | 0.4190 | 0.4567 | 0.3792 | -0.0183 | -0.1450 | - |
| 0.0493 | 1   | .   |                             |        |        |        |         |         |   |
| 2365   | C   | C   | . ASN ASN ASN A A 309 309 . | 0.1857 | 0.2012 | 0.2181 | 0.0023  | -0.0231 |   |
| 0.0088 | 1   | .   |                             |        |        |        |         |         |   |
| 2366   | O   | O   | . ASN ASN ASN A A 309 309 . | 0.2027 | 0.2197 | 0.2681 | -0.0059 | -0.0625 |   |
| 0.0035 | 1   | .   |                             |        |        |        |         |         |   |
| 2367   | N   | N   | . VAL VAL VAL A A 310 310 . | 0.1734 | 0.1872 | 0.1425 | 0.0077  | -0.0282 | - |
| 0.0067 | 1   | .   |                             |        |        |        |         |         |   |
| 2368   | CA  | CA  | . VAL VAL VAL A A 310 310 . | 0.1828 | 0.1871 | 0.1461 | 0.0003  | -0.0137 | - |
| 0.0014 | 1   | .   |                             |        |        |        |         |         |   |
| 2369   | CB  | CB  | . VAL VAL VAL A A 310 310 . | 0.1477 | 0.1872 | 0.1422 | -0.0090 | -0.0202 |   |
| 0.0127 | 1   | .   |                             |        |        |        |         |         |   |
| 2370   | CG1 | CG1 | . VAL VAL VAL A A 310 310 . | 0.1792 | 0.2109 | 0.1886 | 0.0493  | -0.0072 | - |
| 0.0033 | 1   | .   |                             |        |        |        |         |         |   |
| 2371   | CG2 | CG2 | . VAL VAL VAL A A 310 310 . | 0.2326 | 0.1835 | 0.1428 | 0.0117  | -0.0140 | - |
| 0.0593 | 1   | .   |                             |        |        |        |         |         |   |
| 2372   | C   | C   | . VAL VAL VAL A A 310 310 . | 0.1458 | 0.1599 | 0.1262 | 0.0093  | -0.0362 |   |
| 0.0011 | 1   | .   |                             |        |        |        |         |         |   |
| 2373   | O   | O   | . VAL VAL VAL A A 310 310 . | 0.1799 | 0.1510 | 0.1665 | -0.0093 | -0.0215 | - |
| 0.0023 | 1   | .   |                             |        |        |        |         |         |   |
| 2374   | N   | N   | . GLY GLY GLY A A 311 311 . | 0.1455 | 0.1362 | 0.1051 | 0.0121  | -0.0309 | - |
| 0.0154 | 1   | .   |                             |        |        |        |         |         |   |
| 2375   | CA  | CA  | . GLY GLY GLY A A 311 311 . | 0.1435 | 0.1411 | 0.0968 | -0.0019 | -0.0299 | - |
| 0.0145 | 1   | .   |                             |        |        |        |         |         |   |
| 2376   | C   | C   | . GLY GLY GLY A A 311 311 . | 0.1179 | 0.1109 | 0.1156 | 0.0054  | 0.0024  | - |
| 0.0179 | 1   | .   |                             |        |        |        |         |         |   |
| 2377   | O   | O   | . GLY GLY GLY A A 311 311 . | 0.1487 | 0.1448 | 0.1312 | 0.0157  | -0.0078 | - |
| 0.0024 | 1   | .   |                             |        |        |        |         |         |   |
| 2378   | N   | N   | . ILE ILE ILE A A 312 312 . | 0.1687 | 0.1287 | 0.1178 | -0.0005 | -0.0196 |   |
| 0.0115 | 1   | .   |                             |        |        |        |         |         |   |
| 2379   | CA  | CA  | . ILE ILE ILE A A 312 312 . | 0.1175 | 0.1132 | 0.1004 | -0.0048 | -0.0167 | - |
| 0.0023 | 1   | .   |                             |        |        |        |         |         |   |
| 2380   | CB  | CB  | . ILE ILE ILE A A 312 312 . | 0.1129 | 0.0946 | 0.0953 | -0.0127 | -0.0045 | - |
| 0.0173 | 1   | .   |                             |        |        |        |         |         |   |
| 2381   | CG1 | CG1 | . ILE ILE ILE A A 312 312 . | 0.1296 | 0.1752 | 0.1214 | 0.0025  | 0.0116  |   |
| 0.0066 | 1   | .   |                             |        |        |        |         |         |   |
| 2382   | CD  | CD  | . ILE ILE ILE A A 312 312 . | 0.1675 | 0.1679 | 0.1094 | -0.0308 | 0.0168  |   |
| 0.0061 | 1   | .   |                             |        |        |        |         |         |   |
| 2383   | CG2 | CG2 | . ILE ILE ILE A A 312 312 . | 0.1904 | 0.1178 | 0.1207 | -0.0275 | -0.0322 | - |
| 0.0164 | 1   | .   |                             |        |        |        |         |         |   |
| 2384   | C   | C   | . ILE ILE ILE A A 312 312 . | 0.1275 | 0.1071 | 0.0955 | 0.0011  | -0.0202 |   |
| 0.0047 | 1   | .   |                             |        |        |        |         |         |   |
| 2385   | O   | O   | . ILE ILE ILE A A 312 312 . | 0.1274 | 0.1231 | 0.1217 | -0.0032 | -0.0145 | - |
| 0.0018 | 1   | .   |                             |        |        |        |         |         |   |
| 2386   | N   | N   | . GLN GLN GLN A A 313 313 . | 0.1136 | 0.1130 | 0.1022 | -0.0013 | -0.0278 | - |
| 0.0056 | 1   | .   |                             |        |        |        |         |         |   |
| 2387   | CA  | CA  | . GLN GLN GLN A A 313 313 . | 0.1307 | 0.1055 | 0.1052 | 0.0074  | -0.0143 |   |
| 0.0010 | 1   | .   |                             |        |        |        |         |         |   |
| 2388   | CB  | CB  | . GLN GLN GLN A A 313 313 . | 0.1368 | 0.1280 | 0.0944 | 0.0073  | -0.0103 | - |
| 0.0259 | 1   | .   |                             |        |        |        |         |         |   |
| 2389   | CG  | CG  | . GLN GLN GLN A A 313 313 . | 0.1294 | 0.1433 | 0.1118 | -0.0048 | -0.0307 | - |
| 0.0355 | 1   | .   |                             |        |        |        |         |         |   |
| 2390   | CD  | CD  | . GLN GLN GLN A A 313 313 . | 0.1284 | 0.1303 | 0.0993 | -0.0081 | 0.0056  |   |
| 0.0121 | 1   | .   |                             |        |        |        |         |         |   |
| 2391   | OE1 | OE1 | . GLN GLN GLN A A 313 313 . | 0.1095 | 0.1402 | 0.0931 | 0.0084  | -0.0039 | - |
| 0.0015 | 1   | .   |                             |        |        |        |         |         |   |
| 2392   | NE2 | NE2 | . GLN GLN GLN A A 313 313 . | 0.1699 | 0.1172 | 0.1082 | 0.0034  | -0.0344 |   |
| 0.0127 | 1   | .   |                             |        |        |        |         |         |   |





|        |     |     |                             |        |        |        |         |         |   |
|--------|-----|-----|-----------------------------|--------|--------|--------|---------|---------|---|
| 2423   | CA  | CA  | . ASP ASP ASP A A 318 318 . | 0.0944 | 0.0912 | 0.1000 | 0.0240  | 0.0025  |   |
| 0.0089 | 1   | .   |                             |        |        |        |         |         |   |
| 2424   | CB  | CB  | . ASP ASP ASP A A 318 318 . | 0.1290 | 0.0931 | 0.0841 | 0.0212  | 0.0034  |   |
| 0.0156 | 1   | .   |                             |        |        |        |         |         |   |
| 2425   | CG  | CG  | . ASP ASP ASP A A 318 318 . | 0.1351 | 0.1320 | 0.1318 | -0.0007 | -0.0042 |   |
| 0.0012 | 1   | .   |                             |        |        |        |         |         |   |
| 2426   | OD1 | OD1 | . ASP ASP ASP A A 318 318 . | 0.1283 | 0.1473 | 0.1286 | 0.0021  | -0.0108 |   |
| 0.0140 | 1   | .   |                             |        |        |        |         |         |   |
| 2427   | OD2 | OD2 | . ASP ASP ASP A A 318 318 . | 0.1481 | 0.1486 | 0.1711 | 0.0060  | -0.0023 | - |
| 0.0042 | 1   | .   |                             |        |        |        |         |         |   |
| 2428   | C   | C   | . ASP ASP ASP A A 318 318 . | 0.1105 | 0.1072 | 0.0946 | 0.0105  | -0.0061 | - |
| 0.0079 | 1   | .   |                             |        |        |        |         |         |   |
| 2429   | O   | O   | . ASP ASP ASP A A 318 318 . | 0.1281 | 0.1269 | 0.1125 | 0.0202  | -0.0241 |   |
| 0.0008 | 1   | .   |                             |        |        |        |         |         |   |
| 2430   | N   | N   | . LEU LEU LEU A A 319 319 . | 0.1084 | 0.1192 | 0.0905 | 0.0159  | -0.0106 |   |
| 0.0021 | 1   | .   |                             |        |        |        |         |         |   |
| 2431   | CA  | CA  | . LEU LEU LEU A A 319 319 . | 0.1144 | 0.0839 | 0.0773 | 0.0043  | -0.0060 | - |
| 0.0066 | 1   | .   |                             |        |        |        |         |         |   |
| 2432   | CB  | CB  | . LEU LEU LEU A A 319 319 . | 0.1269 | 0.0843 | 0.0760 | 0.0270  | -0.0146 | - |
| 0.0202 | 1   | .   |                             |        |        |        |         |         |   |
| 2433   | CG  | CG  | . LEU LEU LEU A A 319 319 . | 0.1186 | 0.1332 | 0.1027 | 0.0021  | -0.0195 |   |
| 0.0113 | 1   | .   |                             |        |        |        |         |         |   |
| 2434   | CD1 | CD1 | . LEU LEU LEU A A 319 319 . | 0.1188 | 0.2095 | 0.1387 | -0.0015 | -0.0354 |   |
| 0.0060 | 1   | .   |                             |        |        |        |         |         |   |
| 2435   | CD2 | CD2 | . LEU LEU LEU A A 319 319 . | 0.1543 | 0.1795 | 0.1188 | -0.0017 | -0.0293 | - |
| 0.0133 | 1   | .   |                             |        |        |        |         |         |   |
| 2436   | C   | C   | . LEU LEU LEU A A 319 319 . | 0.1248 | 0.1185 | 0.0982 | 0.0071  | 0.0000  |   |
| 0.0008 | 1   | .   |                             |        |        |        |         |         |   |
| 2437   | O   | O   | . LEU LEU LEU A A 319 319 . | 0.1502 | 0.1462 | 0.1294 | 0.0218  | -0.0029 |   |
| 0.0309 | 1   | .   |                             |        |        |        |         |         |   |
| 2438   | N   | N   | . THR THR THR A A 320 320 . | 0.1026 | 0.1137 | 0.1003 | -0.0085 | -0.0044 | - |
| 0.0010 | 1   | .   |                             |        |        |        |         |         |   |
| 2439   | CA  | CA  | . THR THR THR A A 320 320 . | 0.0913 | 0.1112 | 0.0854 | -0.0005 | 0.0006  | - |
| 0.0086 | 1   | .   |                             |        |        |        |         |         |   |
| 2440   | CB  | CB  | . THR THR THR A A 320 320 . | 0.1155 | 0.1160 | 0.1009 | 0.0110  | 0.0143  |   |
| 0.0134 | 1   | .   |                             |        |        |        |         |         |   |
| 2441   | OG1 | OG1 | . THR THR THR A A 320 320 . | 0.1401 | 0.1137 | 0.1343 | 0.0073  | -0.0059 | - |
| 0.0022 | 1   | .   |                             |        |        |        |         |         |   |
| 2442   | CG2 | CG2 | . THR THR THR A A 320 320 . | 0.1409 | 0.1698 | 0.1344 | -0.0204 | 0.0146  |   |
| 0.0032 | 1   | .   |                             |        |        |        |         |         |   |
| 2443   | C   | C   | . THR THR THR A A 320 320 . | 0.1178 | 0.1086 | 0.1022 | -0.0002 | -0.0058 |   |
| 0.0047 | 1   | .   |                             |        |        |        |         |         |   |
| 2444   | O   | O   | . THR THR THR A A 320 320 . | 0.1220 | 0.1356 | 0.1143 | -0.0128 | -0.0108 |   |
| 0.0220 | 1   | .   |                             |        |        |        |         |         |   |
| 2445   | N   | N   | . VAL VAL VAL A A 321 321 . | 0.1241 | 0.0971 | 0.1020 | 0.0085  | -0.0097 |   |
| 0.0048 | 1   | .   |                             |        |        |        |         |         |   |
| 2446   | CA  | CA  | . VAL VAL VAL A A 321 321 . | 0.1256 | 0.1164 | 0.1124 | 0.0093  | -0.0033 |   |
| 0.0035 | 1   | .   |                             |        |        |        |         |         |   |
| 2447   | CB  | CB  | . VAL VAL VAL A A 321 321 . | 0.1260 | 0.0993 | 0.1388 | 0.0278  | -0.0089 | - |
| 0.0025 | 1   | .   |                             |        |        |        |         |         |   |
| 2448   | CG1 | CG1 | . VAL VAL VAL A A 321 321 . | 0.1563 | 0.1172 | 0.1065 | -0.0109 | -0.0098 |   |
| 0.0047 | 1   | .   |                             |        |        |        |         |         |   |
| 2449   | CG2 | CG2 | . VAL VAL VAL A A 321 321 . | 0.1336 | 0.0941 | 0.1538 | -0.0141 | -0.0267 |   |
| 0.0381 | 1   | .   |                             |        |        |        |         |         |   |
| 2450   | C   | C   | . VAL VAL VAL A A 321 321 . | 0.1196 | 0.0898 | 0.0838 | 0.0077  | -0.0051 |   |
| 0.0179 | 1   | .   |                             |        |        |        |         |         |   |
| 2451   | O   | O   | . VAL VAL VAL A A 321 321 . | 0.1079 | 0.1113 | 0.1035 | 0.0012  | -0.0054 |   |
| 0.0102 | 1   | .   |                             |        |        |        |         |         |   |
| 2452   | N   | N   | . THR THR THR A A 322 322 . | 0.0760 | 0.1144 | 0.1005 | 0.0057  | -0.0069 |   |
| 0.0023 | 1   | .   |                             |        |        |        |         |         |   |

|        |     |     |                             |        |        |        |         |         |
|--------|-----|-----|-----------------------------|--------|--------|--------|---------|---------|
| 2453   | CA  | CA  | . THR THR THR A A 322 322 . | 0.0841 | 0.0999 | 0.1051 | 0.0026  | -0.0184 |
| 0.0172 | 1   | .   |                             |        |        |        |         |         |
| 2454   | CB  | CB  | . THR THR THR A A 322 322 . | 0.1020 | 0.0890 | 0.0913 | -0.0065 | -0.0116 |
| 0.0251 | 1   | .   |                             |        |        |        |         |         |
| 2455   | OG1 | OG1 | . THR THR THR A A 322 322 . | 0.1118 | 0.0971 | 0.0968 | -0.0147 | -0.0219 |
| 0.0261 | 1   | .   |                             |        |        |        |         |         |
| 2456   | CG2 | CG2 | . THR THR THR A A 322 322 . | 0.1269 | 0.1195 | 0.1363 | -0.0141 | 0.0337  |
| 0.0073 | 1   | .   |                             |        |        |        |         |         |
| 2457   | C   | C   | . THR THR THR A A 322 322 . | 0.1096 | 0.1129 | 0.0961 | -0.0148 | -0.0060 |
| 0.0091 | 1   | .   |                             |        |        |        |         |         |
| 2458   | O   | O   | . THR THR THR A A 322 322 . | 0.1183 | 0.1107 | 0.1242 | -0.0077 | -0.0158 |
| 0.0107 | 1   | .   |                             |        |        |        |         |         |
| 2459   | N   | N   | . ASN ASN ASN A A 323 323 . | 0.1370 | 0.1060 | 0.1347 | -0.0019 | -0.0050 |
| 0.0308 | 1   | .   |                             |        |        |        |         |         |
| 2460   | CA  | CA  | . ASN ASN ASN A A 323 323 . | 0.1696 | 0.1322 | 0.1526 | -0.0017 | -0.0072 |
| 0.0194 | 1   | .   |                             |        |        |        |         |         |
| 2461   | CB  | CB  | . ASN ASN ASN A A 323 323 . | 0.1564 | 0.1119 | 0.1552 | 0.0122  | 0.0004  |
| 0.0074 | 1   | .   |                             |        |        |        |         |         |
| 2462   | CG  | CG  | . ASN ASN ASN A A 323 323 . | 0.1867 | 0.1029 | 0.1431 | -0.0197 | 0.0067  |
| 0.0128 | 1   | .   |                             |        |        |        |         |         |
| 2463   | OD1 | OD1 | . ASN ASN ASN A A 323 323 . | 0.3124 | 0.1649 | 0.1947 | 0.0337  | 0.0252  |
| 0.0274 | 1   | .   |                             |        |        |        |         |         |
| 2464   | ND2 | ND2 | . ASN ASN ASN A A 323 323 . | 0.2089 | 0.1871 | 0.1396 | 0.0148  | -0.0007 |
| 0.0292 | 1   | .   |                             |        |        |        |         |         |
| 2465   | C   | C   | . ASN ASN ASN A A 323 323 . | 0.1412 | 0.1465 | 0.1328 | -0.0172 | 0.0047  |
| 0.0123 | 1   | .   |                             |        |        |        |         |         |
| 2466   | O   | O   | . ASN ASN ASN A A 323 323 . | 0.1524 | 0.1508 | 0.1403 | -0.0099 | -0.0198 |
| 0.0231 | 1   | .   |                             |        |        |        |         |         |
| 2467   | N   | N   | . PRO PRO PRO A A 324 324 . | 0.1664 | 0.1785 | 0.1524 | -0.0142 | 0.0023  |
| 0.0167 | 1   | .   |                             |        |        |        |         |         |
| 2468   | CA  | CA  | . PRO PRO PRO A A 324 324 . | 0.1747 | 0.1852 | 0.1560 | -0.0220 | 0.0013  |
| 0.0331 | 1   | .   |                             |        |        |        |         |         |
| 2469   | CB  | CB  | . PRO PRO PRO A A 324 324 . | 0.1807 | 0.2236 | 0.1854 | -0.0229 | 0.0176  |
| 0.0343 | 1   | .   |                             |        |        |        |         |         |
| 2470   | CG  | CG  | . PRO PRO PRO A A 324 324 . | 0.1635 | 0.2152 | 0.2210 | -0.0181 | 0.0348  |
| 0.0187 | 1   | .   |                             |        |        |        |         |         |
| 2471   | CD  | CD  | . PRO PRO PRO A A 324 324 . | 0.1663 | 0.1905 | 0.1605 | -0.0186 | 0.0010  |
| 0.0337 | 1   | .   |                             |        |        |        |         |         |
| 2472   | C   | C   | . PRO PRO PRO A A 324 324 . | 0.1908 | 0.1574 | 0.1709 | -0.0246 | 0.0019  |
| 0.0142 | 1   | .   |                             |        |        |        |         |         |
| 2473   | O   | O   | . PRO PRO PRO A A 324 324 . | 0.2273 | 0.1801 | 0.1516 | -0.0002 | -0.0096 |
| 0.0491 | 1   | .   |                             |        |        |        |         |         |
| 2474   | N   | N   | . LYS LYS LYS A A 325 325 . | 0.1908 | 0.1810 | 0.1822 | 0.0085  | 0.0144  |
| 0.0407 | 1   | .   |                             |        |        |        |         |         |
| 2475   | CA  | CA  | . LYS LYS LYS A A 325 325 . | 0.2081 | 0.1817 | 0.1966 | 0.0034  | -0.0065 |
| 0.0246 | 1   | .   |                             |        |        |        |         |         |
| 2476   | CB  | CB  | . LYS LYS LYS A A 325 325 . | 0.2248 | 0.2066 | 0.2397 | 0.0293  | 0.0081  |
| 0.0033 | 1   | .   |                             |        |        |        |         |         |
| 2477   | CG  | CG  | . LYS LYS LYS A A 325 325 . | 0.3306 | 0.3638 | 0.3771 | 0.0070  | -0.0351 |
| 0.0151 | 1   | .   |                             |        |        |        |         |         |
| 2478   | CD  | CD  | . LYS LYS LYS A A 325 325 . | 0.4676 | 0.5462 | 0.5252 | 0.0300  | 0.0047  |
| 0.0199 | 1   | .   |                             |        |        |        |         |         |
| 2479   | CE  | CE  | . LYS LYS LYS A A 325 325 . | 0.5861 | 0.5622 | 0.5500 | 0.0323  | -0.0118 |
| 0.0398 | 1   | .   |                             |        |        |        |         |         |
| 2480   | NZ  | NZ  | . LYS LYS LYS A A 325 325 . | 0.6537 | 0.6040 | 0.5560 | 0.0235  | -0.0238 |
| 0.0301 | 1   | .   |                             |        |        |        |         |         |
| 2481   | C   | C   | . LYS LYS LYS A A 325 325 . | 0.1875 | 0.1667 | 0.1704 | 0.0120  | -0.0172 |
| 0.0339 | 1   | .   |                             |        |        |        |         |         |
| 2482   | O   | O   | . LYS LYS LYS A A 325 325 . | 0.2394 | 0.1856 | 0.1935 | 0.0183  | -0.0085 |
| 0.0346 | 1   | .   |                             |        |        |        |         |         |

|        |     |     |                             |        |        |        |         |         |   |
|--------|-----|-----|-----------------------------|--------|--------|--------|---------|---------|---|
| 2483   | N   | N   | . ARG ARG ARG A A 326 326 . | 0.1820 | 0.1531 | 0.1501 | 0.0133  | -0.0124 |   |
| 0.0561 | 1   | .   |                             |        |        |        |         |         |   |
| 2484   | CA  | CA  | . ARG ARG ARG A A 326 326 . | 0.1701 | 0.1554 | 0.1523 | -0.0044 | -0.0181 |   |
| 0.0266 | 1   | .   |                             |        |        |        |         |         |   |
| 2485   | CB  | CB  | . ARG ARG ARG A A 326 326 . | 0.1641 | 0.1539 | 0.1538 | -0.0203 | 0.0046  |   |
| 0.0087 | 1   | .   |                             |        |        |        |         |         |   |
| 2486   | CG  | CG  | . ARG ARG ARG A A 326 326 . | 0.2663 | 0.1792 | 0.2235 | -0.0462 | -0.0384 | - |
| 0.0233 | 1   | .   |                             |        |        |        |         |         |   |
| 2487   | CD  | CD  | . ARG ARG ARG A A 326 326 . | 0.3422 | 0.3428 | 0.3229 | -0.0050 | -0.0098 |   |
| 0.0253 | 1   | .   |                             |        |        |        |         |         |   |
| 2488   | NE  | NE  | . ARG ARG ARG A A 326 326 . | 0.2480 | 0.2474 | 0.2567 | 0.0971  | -0.0278 | - |
| 0.0236 | 1   | .   |                             |        |        |        |         |         |   |
| 2489   | CZ  | CZ  | . ARG ARG ARG A A 326 326 . | 0.2703 | 0.1219 | 0.1878 | 0.0019  | -0.0014 |   |
| 0.0163 | 1   | .   |                             |        |        |        |         |         |   |
| 2490   | NH1 | NH1 | . ARG ARG ARG A A 326 326 . | 0.1189 | 0.1548 | 0.1870 | -0.0073 | -0.0010 |   |
| 0.0171 | 1   | .   |                             |        |        |        |         |         |   |
| 2491   | NH2 | NH2 | . ARG ARG ARG A A 326 326 . | 0.2405 | 0.1561 | 0.2203 | 0.0712  | 0.0200  |   |
| 0.0421 | 1   | .   |                             |        |        |        |         |         |   |
| 2492   | C   | C   | . ARG ARG ARG A A 326 326 . | 0.1443 | 0.1481 | 0.1492 | -0.0151 | -0.0095 |   |
| 0.0245 | 1   | .   |                             |        |        |        |         |         |   |
| 2493   | O   | O   | . ARG ARG ARG A A 326 326 . | 0.1816 | 0.1800 | 0.1335 | 0.0166  | -0.0470 |   |
| 0.0313 | 1   | .   |                             |        |        |        |         |         |   |
| 2494   | N   | N   | . ILE ILE ILE A A 327 327 . | 0.1499 | 0.1351 | 0.1282 | 0.0148  | -0.0023 |   |
| 0.0341 | 1   | .   |                             |        |        |        |         |         |   |
| 2495   | CA  | CA  | . ILE ILE ILE A A 327 327 . | 0.1482 | 0.1502 | 0.1299 | 0.0102  | -0.0100 |   |
| 0.0186 | 1   | .   |                             |        |        |        |         |         |   |
| 2496   | CB  | CB  | . ILE ILE ILE A A 327 327 . | 0.1303 | 0.1298 | 0.1158 | -0.0150 | -0.0083 |   |
| 0.0000 | 1   | .   |                             |        |        |        |         |         |   |
| 2497   | CG1 | CG1 | . ILE ILE ILE A A 327 327 . | 0.1180 | 0.1301 | 0.1481 | 0.0048  | -0.0233 |   |
| 0.0104 | 1   | .   |                             |        |        |        |         |         |   |
| 2498   | CD  | CD  | . ILE ILE ILE A A 327 327 . | 0.1075 | 0.1358 | 0.1514 | -0.0150 | -0.0467 |   |
| 0.0227 | 1   | .   |                             |        |        |        |         |         |   |
| 2499   | CG2 | CG2 | . ILE ILE ILE A A 327 327 . | 0.1585 | 0.1423 | 0.1469 | 0.0175  | -0.0065 | - |
| 0.0261 | 1   | .   |                             |        |        |        |         |         |   |
| 2500   | C   | C   | . ILE ILE ILE A A 327 327 . | 0.1890 | 0.1391 | 0.1466 | -0.0003 | -0.0125 |   |
| 0.0185 | 1   | .   |                             |        |        |        |         |         |   |
| 2501   | O   | O   | . ILE ILE ILE A A 327 327 . | 0.2041 | 0.1794 | 0.1334 | 0.0101  | -0.0059 |   |
| 0.0179 | 1   | .   |                             |        |        |        |         |         |   |
| 2502   | N   | N   | . GLU GLU GLU A A 328 328 . | 0.2287 | 0.1597 | 0.1479 | 0.0041  | -0.0199 |   |
| 0.0188 | 1   | .   |                             |        |        |        |         |         |   |
| 2503   | CA  | CA  | . GLU GLU GLU A A 328 328 . | 0.2120 | 0.1797 | 0.1619 | -0.0078 | -0.0207 |   |
| 0.0398 | 1   | .   |                             |        |        |        |         |         |   |
| 2504   | CB  | CB  | . GLU GLU GLU A A 328 328 . | 0.2277 | 0.1885 | 0.2298 | -0.0224 | -0.0399 |   |
| 0.0436 | 1   | .   |                             |        |        |        |         |         |   |
| 2505   | CG  | CG  | . GLU GLU GLU A A 328 328 . | 0.2473 | 0.2953 | 0.2595 | -0.0191 | -0.0129 |   |
| 0.0282 | 1   | .   |                             |        |        |        |         |         |   |
| 2506   | CD  | CD  | . GLU GLU GLU A A 328 328 . | 0.3942 | 0.4594 | 0.3697 | -0.0780 | 0.0051  | - |
| 0.0012 | 1   | .   |                             |        |        |        |         |         |   |
| 2507   | OE1 | OE1 | . GLU GLU GLU A A 328 328 . | 0.3861 | 0.4417 | 0.4233 | -0.1192 | 0.0118  |   |
| 0.0640 | 1   | .   |                             |        |        |        |         |         |   |
| 2508   | OE2 | OE2 | . GLU GLU GLU A A 328 328 . | 0.5292 | 0.5273 | 0.3529 | -0.0830 | -0.0546 |   |
| 0.0000 | 1   | .   |                             |        |        |        |         |         |   |
| 2509   | C   | C   | . GLU GLU GLU A A 328 328 . | 0.2249 | 0.1652 | 0.1929 | -0.0017 | -0.0074 |   |
| 0.0399 | 1   | .   |                             |        |        |        |         |         |   |
| 2510   | O   | O   | . GLU GLU GLU A A 328 328 . | 0.2677 | 0.2182 | 0.1751 | -0.0137 | -0.0141 |   |
| 0.0358 | 1   | .   |                             |        |        |        |         |         |   |
| 2511   | N   | N   | . ARG ARG ARG A A 329 329 . | 0.1998 | 0.1421 | 0.1518 | 0.0081  | -0.0082 |   |
| 0.0237 | 1   | .   |                             |        |        |        |         |         |   |
| 2512   | CA  | CA  | . ARG ARG ARG A A 329 329 . | 0.1965 | 0.1553 | 0.1683 | 0.0194  | -0.0058 |   |
| 0.0298 | 1   | .   |                             |        |        |        |         |         |   |

|        |     |     |                             |        |        |        |         |         |   |
|--------|-----|-----|-----------------------------|--------|--------|--------|---------|---------|---|
| 2513   | CB  | CB  | . ARG ARG ARG A A 329 329 . | 0.2095 | 0.1625 | 0.1912 | 0.0157  | -0.0156 |   |
| 0.0259 | 1   | .   |                             |        |        |        |         |         |   |
| 2514   | CG  | CG  | . ARG ARG ARG A A 329 329 . | 0.2181 | 0.2177 | 0.2090 | 0.0204  | -0.0014 |   |
| 0.0243 | 1   | .   |                             |        |        |        |         |         |   |
| 2515   | CD  | CD  | . ARG ARG ARG A A 329 329 . | 0.3331 | 0.2516 | 0.3031 | 0.0397  | 0.0463  |   |
| 0.0186 | 1   | .   |                             |        |        |        |         |         |   |
| 2516   | NE  | NE  | . ARG ARG ARG A A 329 329 . | 0.3401 | 0.2347 | 0.3294 | 0.0511  | 0.0449  |   |
| 0.0407 | 1   | .   |                             |        |        |        |         |         |   |
| 2517   | CZ  | CZ  | . ARG ARG ARG A A 329 329 . | 0.2970 | 0.2769 | 0.3412 | 0.0634  | 0.0054  |   |
| 0.0229 | 1   | .   |                             |        |        |        |         |         |   |
| 2518   | NH1 | NH1 | . ARG ARG ARG A A 329 329 . | 0.2805 | 0.2544 | 0.3144 | 0.0584  | 0.0152  |   |
| 0.0287 | 1   | .   |                             |        |        |        |         |         |   |
| 2519   | NH2 | NH2 | . ARG ARG ARG A A 329 329 . | 0.2783 | 0.2315 | 0.4535 | 0.0734  | -0.0066 |   |
| 0.0392 | 1   | .   |                             |        |        |        |         |         |   |
| 2520   | C   | C   | . ARG ARG ARG A A 329 329 . | 0.1925 | 0.1707 | 0.1690 | 0.0223  | -0.0166 |   |
| 0.0094 | 1   | .   |                             |        |        |        |         |         |   |
| 2521   | O   | O   | . ARG ARG ARG A A 329 329 . | 0.2141 | 0.1854 | 0.1701 | 0.0134  | -0.0320 |   |
| 0.0338 | 1   | .   |                             |        |        |        |         |         |   |
| 2522   | N   | N   | . ALA ALA ALA A A 330 330 . | 0.1795 | 0.1665 | 0.1575 | 0.0188  | -0.0015 |   |
| 0.0286 | 1   | .   |                             |        |        |        |         |         |   |
| 2523   | CA  | CA  | . ALA ALA ALA A A 330 330 . | 0.1571 | 0.1747 | 0.1563 | 0.0210  | -0.0134 |   |
| 0.0245 | 1   | .   |                             |        |        |        |         |         |   |
| 2524   | CB  | CB  | . ALA ALA ALA A A 330 330 . | 0.1336 | 0.1682 | 0.1363 | 0.0115  | -0.0259 |   |
| 0.0697 | 1   | .   |                             |        |        |        |         |         |   |
| 2525   | C   | C   | . ALA ALA ALA A A 330 330 . | 0.1915 | 0.1856 | 0.1672 | -0.0028 | -0.0036 |   |
| 0.0099 | 1   | .   |                             |        |        |        |         |         |   |
| 2526   | O   | O   | . ALA ALA ALA A A 330 330 . | 0.2026 | 0.1823 | 0.1420 | -0.0034 | 0.0012  |   |
| 0.0056 | 1   | .   |                             |        |        |        |         |         |   |
| 2527   | N   | N   | . VAL VAL VAL A A 331 331 . | 0.1891 | 0.1913 | 0.1567 | 0.0014  | 0.0057  |   |
| 0.0053 | 1   | .   |                             |        |        |        |         |         |   |
| 2528   | CA  | CA  | . VAL VAL VAL A A 331 331 . | 0.2212 | 0.2090 | 0.1775 | -0.0049 | 0.0130  | - |
| 0.0045 | 1   | .   |                             |        |        |        |         |         |   |
| 2529   | CB  | CB  | . VAL VAL VAL A A 331 331 . | 0.2044 | 0.2166 | 0.1641 | -0.0087 | 0.0044  | - |
| 0.0075 | 1   | .   |                             |        |        |        |         |         |   |
| 2530   | CG1 | CG1 | . VAL VAL VAL A A 331 331 . | 0.2149 | 0.2369 | 0.1876 | 0.0141  | 0.0294  |   |
| 0.0206 | 1   | .   |                             |        |        |        |         |         |   |
| 2531   | CG2 | CG2 | . VAL VAL VAL A A 331 331 . | 0.2603 | 0.1894 | 0.1805 | 0.0195  | 0.0222  |   |
| 0.0040 | 1   | .   |                             |        |        |        |         |         |   |
| 2532   | C   | C   | . VAL VAL VAL A A 331 331 . | 0.2140 | 0.2023 | 0.1721 | -0.0048 | 0.0160  |   |
| 0.0067 | 1   | .   |                             |        |        |        |         |         |   |
| 2533   | O   | O   | . VAL VAL VAL A A 331 331 . | 0.2680 | 0.2038 | 0.1552 | -0.0253 | 0.0088  |   |
| 0.0257 | 1   | .   |                             |        |        |        |         |         |   |
| 2534   | N   | N   | . GLU GLU GLU A A 332 332 . | 0.2333 | 0.1979 | 0.1739 | 0.0053  | -0.0113 |   |
| 0.0201 | 1   | .   |                             |        |        |        |         |         |   |
| 2535   | CA  | CA  | . GLU GLU GLU A A 332 332 . | 0.2826 | 0.2582 | 0.1995 | 0.0035  | -0.0210 |   |
| 0.0396 | 1   | .   |                             |        |        |        |         |         |   |
| 2536   | CB  | CB  | . GLU GLU GLU A A 332 332 . | 0.2912 | 0.2618 | 0.2156 | 0.0080  | -0.0261 |   |
| 0.0489 | 1   | .   |                             |        |        |        |         |         |   |
| 2537   | CG  | CG  | . GLU GLU GLU A A 332 332 . | 0.4586 | 0.3916 | 0.2756 | 0.0144  | -0.0588 |   |
| 0.0541 | 1   | .   |                             |        |        |        |         |         |   |
| 2538   | CD  | CD  | . GLU GLU GLU A A 332 332 . | 0.5421 | 0.5901 | 0.4028 | -0.0304 | 0.0007  |   |
| 0.0378 | 1   | .   |                             |        |        |        |         |         |   |
| 2539   | OE1 | OE1 | . GLU GLU GLU A A 332 332 . | 0.5292 | 0.6292 | 0.4752 | -0.0844 | -0.0126 |   |
| 0.0790 | 1   | .   |                             |        |        |        |         |         |   |
| 2540   | OE2 | OE2 | . GLU GLU GLU A A 332 332 . | 0.6523 | 0.6845 | 0.4724 | -0.0513 | -0.0679 |   |
| 0.0535 | 1   | .   |                             |        |        |        |         |         |   |
| 2541   | C   | C   | . GLU GLU GLU A A 332 332 . | 0.2718 | 0.2382 | 0.1859 | -0.0120 | -0.0236 |   |
| 0.0351 | 1   | .   |                             |        |        |        |         |         |   |
| 2542   | O   | O   | . GLU GLU GLU A A 332 332 . | 0.3126 | 0.2576 | 0.2112 | -0.0097 | -0.0385 |   |
| 0.0536 | 1   | .   |                             |        |        |        |         |         |   |

|        |     |     |                             |        |        |        |         |         |   |
|--------|-----|-----|-----------------------------|--------|--------|--------|---------|---------|---|
| 2543   | N   | N   | . GLU GLU GLU A A 333 333 . | 0.2225 | 0.2098 | 0.1680 | -0.0067 | -0.0049 |   |
| 0.0442 | 1   | .   |                             |        |        |        |         |         |   |
| 2544   | CA  | CA  | . GLU GLU GLU A A 333 333 . | 0.1974 | 0.1931 | 0.1754 | 0.0006  | -0.0319 |   |
| 0.0221 | 1   | .   |                             |        |        |        |         |         |   |
| 2545   | CB  | CB  | . GLU GLU GLU A A 333 333 . | 0.2477 | 0.2179 | 0.2376 | 0.0020  | -0.0261 |   |
| 0.0018 | 1   | .   |                             |        |        |        |         |         |   |
| 2546   | CG  | CG  | . GLU GLU GLU A A 333 333 . | 0.2580 | 0.2411 | 0.2629 | 0.0385  | -0.0527 | - |
| 0.0081 | 1   | .   |                             |        |        |        |         |         |   |
| 2547   | CD  | CD  | . GLU GLU GLU A A 333 333 . | 0.3115 | 0.3599 | 0.3639 | -0.0088 | 0.0010  | - |
| 0.0212 | 1   | .   |                             |        |        |        |         |         |   |
| 2548   | OE1 | OE1 | . GLU GLU GLU A A 333 333 . | 0.2758 | 0.3463 | 0.4707 | -0.0071 | 0.0206  |   |
| 0.0348 | 1   | .   |                             |        |        |        |         |         |   |
| 2549   | OE2 | OE2 | . GLU GLU GLU A A 333 333 . | 0.4111 | 0.4032 | 0.2828 | -0.0078 | -0.0556 |   |
| 0.0238 | 1   | .   |                             |        |        |        |         |         |   |
| 2550   | C   | C   | . GLU GLU GLU A A 333 333 . | 0.1662 | 0.1780 | 0.1423 | 0.0034  | -0.0241 |   |
| 0.0194 | 1   | .   |                             |        |        |        |         |         |   |
| 2551   | O   | O   | . GLU GLU GLU A A 333 333 . | 0.1941 | 0.1815 | 0.1666 | -0.0069 | -0.0479 |   |
| 0.0164 | 1   | .   |                             |        |        |        |         |         |   |
| 2552   | N   | N   | . LYS LYS LYS A A 334 334 . | 0.1693 | 0.1908 | 0.1366 | 0.0050  | -0.0201 |   |
| 0.0173 | 1   | .   |                             |        |        |        |         |         |   |
| 2553   | CA  | CA  | . LYS LYS LYS A A 334 334 . | 0.2004 | 0.1733 | 0.1503 | -0.0155 | -0.0118 | - |
| 0.0118 | 1   | .   |                             |        |        |        |         |         |   |
| 2554   | CB  | CB  | . LYS LYS LYS A A 334 334 . | 0.2371 | 0.1852 | 0.1608 | -0.0246 | -0.0127 | - |
| 0.0144 | 1   | .   |                             |        |        |        |         |         |   |
| 2555   | CG  | CG  | . LYS LYS LYS A A 334 334 . | 0.2911 | 0.2485 | 0.1992 | -0.0367 | 0.0156  | - |
| 0.0146 | 1   | .   |                             |        |        |        |         |         |   |
| 2556   | CD  | CD  | . LYS LYS LYS A A 334 334 . | 0.4442 | 0.4647 | 0.4062 | 0.0075  | 0.0308  | - |
| 0.0357 | 1   | .   |                             |        |        |        |         |         |   |
| 2557   | CE  | CE  | . LYS LYS LYS A A 334 334 . | 0.4970 | 0.5061 | 0.4613 | -0.0315 | -0.0428 | - |
| 0.0437 | 1   | .   |                             |        |        |        |         |         |   |
| 2558   | NZ  | NZ  | . LYS LYS LYS A A 334 334 . | 0.4977 | 0.5419 | 0.4480 | 0.0066  | -0.0140 |   |
| 0.0051 | 1   | .   |                             |        |        |        |         |         |   |
| 2559   | C   | C   | . LYS LYS LYS A A 334 334 . | 0.1798 | 0.1498 | 0.1398 | -0.0049 | -0.0045 | - |
| 0.0036 | 1   | .   |                             |        |        |        |         |         |   |
| 2560   | O   | O   | . LYS LYS LYS A A 334 334 . | 0.1858 | 0.1624 | 0.1419 | 0.0115  | -0.0257 |   |
| 0.0000 | 1   | .   |                             |        |        |        |         |         |   |
| 2561   | N   | N   | . ALA ALA ALA A A 335 335 . | 0.1870 | 0.1677 | 0.1226 | 0.0078  | -0.0200 |   |
| 0.0190 | 1   | .   |                             |        |        |        |         |         |   |
| 2562   | CA  | CA  | . ALA ALA ALA A A 335 335 . | 0.1475 | 0.1613 | 0.1340 | 0.0161  | 0.0052  |   |
| 0.0135 | 1   | .   |                             |        |        |        |         |         |   |
| 2563   | CB  | CB  | . ALA ALA ALA A A 335 335 . | 0.1482 | 0.1336 | 0.1307 | 0.0166  | 0.0041  |   |
| 0.0035 | 1   | .   |                             |        |        |        |         |         |   |
| 2564   | C   | C   | . ALA ALA ALA A A 335 335 . | 0.1309 | 0.1383 | 0.1287 | 0.0060  | -0.0081 |   |
| 0.0025 | 1   | .   |                             |        |        |        |         |         |   |
| 2565   | O   | O   | . ALA ALA ALA A A 335 335 . | 0.1067 | 0.1575 | 0.1347 | -0.0009 | -0.0100 |   |
| 0.0064 | 1   | .   |                             |        |        |        |         |         |   |
| 2566   | N   | N   | . CYS CYS CYS A A 336 336 . | 0.1321 | 0.1422 | 0.1442 | 0.0331  | -0.0249 | - |
| 0.0031 | 1   | .   |                             |        |        |        |         |         |   |
| 2567   | CA  | CA  | . CYS CYS CYS A A 336 336 . | 0.1450 | 0.1190 | 0.1194 | 0.0160  | -0.0004 |   |
| 0.0040 | 1   | .   |                             |        |        |        |         |         |   |
| 2568   | CB  | CB  | . CYS CYS CYS A A 336 336 . | 0.1504 | 0.1346 | 0.1273 | -0.0237 | -0.0092 | - |
| 0.0049 | 1   | .   |                             |        |        |        |         |         |   |
| 2569   | SG  | SG  | . CYS CYS CYS A A 336 336 . | 0.1511 | 0.1449 | 0.1327 | 0.0033  | -0.0156 |   |
| 0.0124 | 1   | .   |                             |        |        |        |         |         |   |
| 2570   | C   | C   | . CYS CYS CYS A A 336 336 . | 0.1415 | 0.1360 | 0.1442 | -0.0008 | -0.0077 |   |
| 0.0021 | 1   | .   |                             |        |        |        |         |         |   |
| 2571   | O   | O   | . CYS CYS CYS A A 336 336 . | 0.1475 | 0.1604 | 0.1570 | 0.0036  | -0.0040 |   |
| 0.0192 | 1   | .   |                             |        |        |        |         |         |   |
| 2572   | N   | N   | . ASN ASN ASN A A 337 337 . | 0.1141 | 0.1007 | 0.1220 | 0.0081  | -0.0211 | - |
| 0.0069 | 1   | .   |                             |        |        |        |         |         |   |

|        |     |     |                             |        |        |        |         |         |   |
|--------|-----|-----|-----------------------------|--------|--------|--------|---------|---------|---|
| 2573   | CA  | CA  | . ASN ASN ASN A A 337 337 . | 0.1177 | 0.1027 | 0.1108 | -0.0010 | -0.0081 |   |
| 0.0048 | 1   | .   |                             |        |        |        |         |         |   |
| 2574   | CB  | CB  | . ASN ASN ASN A A 337 337 . | 0.1336 | 0.1173 | 0.1117 | -0.0045 | -0.0086 |   |
| 0.0079 | 1   | .   |                             |        |        |        |         |         |   |
| 2575   | CG  | CG  | . ASN ASN ASN A A 337 337 . | 0.1196 | 0.1051 | 0.1084 | 0.0036  | -0.0200 |   |
| 0.0118 | 1   | .   |                             |        |        |        |         |         |   |
| 2576   | OD1 | OD1 | . ASN ASN ASN A A 337 337 . | 0.1970 | 0.1638 | 0.1637 | -0.0144 | -0.0597 | - |
| 0.0007 | 1   | .   |                             |        |        |        |         |         |   |
| 2577   | ND2 | ND2 | . ASN ASN ASN A A 337 337 . | 0.0960 | 0.0944 | 0.0639 | 0.0067  | -0.0119 | - |
| 0.0123 | 1   | .   |                             |        |        |        |         |         |   |
| 2578   | C   | C   | . ASN ASN ASN A A 337 337 . | 0.1483 | 0.1038 | 0.0962 | 0.0090  | -0.0111 |   |
| 0.0046 | 1   | .   |                             |        |        |        |         |         |   |
| 2579   | O   | O   | . ASN ASN ASN A A 337 337 . | 0.1310 | 0.1480 | 0.1151 | 0.0113  | -0.0280 |   |
| 0.0157 | 1   | .   |                             |        |        |        |         |         |   |
| 2580   | N   | N   | . CYS CYS CYS A A 338 338 . | 0.1353 | 0.1298 | 0.0864 | -0.0084 | -0.0142 | - |
| 0.0050 | 1   | .   |                             |        |        |        |         |         |   |
| 2581   | CA  | CA  | . CYS CYS CYS A A 338 338 . | 0.1069 | 0.1057 | 0.1098 | 0.0144  | -0.0158 | - |
| 0.0121 | 1   | .   |                             |        |        |        |         |         |   |
| 2582   | CB  | CB  | . CYS CYS CYS A A 338 338 . | 0.1072 | 0.1208 | 0.1099 | -0.0012 | -0.0171 |   |
| 0.0063 | 1   | .   |                             |        |        |        |         |         |   |
| 2583   | SG  | SG  | . CYS CYS CYS A A 338 338 . | 0.1245 | 0.1396 | 0.1179 | 0.0098  | -0.0093 |   |
| 0.0144 | 1   | .   |                             |        |        |        |         |         |   |
| 2584   | C   | C   | . CYS CYS CYS A A 338 338 . | 0.1010 | 0.0970 | 0.0913 | 0.0064  | -0.0092 |   |
| 0.0108 | 1   | .   |                             |        |        |        |         |         |   |
| 2585   | O   | O   | . CYS CYS CYS A A 338 338 . | 0.1155 | 0.1199 | 0.1059 | -0.0051 | -0.0090 |   |
| 0.0145 | 1   | .   |                             |        |        |        |         |         |   |
| 2586   | N   | N   | . LEU LEU LEU A A 339 339 . | 0.1000 | 0.1034 | 0.0766 | 0.0004  | -0.0113 | - |
| 0.0007 | 1   | .   |                             |        |        |        |         |         |   |
| 2587   | CA  | CA  | . LEU LEU LEU A A 339 339 . | 0.1176 | 0.0917 | 0.0837 | 0.0121  | -0.0080 |   |
| 0.0088 | 1   | .   |                             |        |        |        |         |         |   |
| 2588   | CB  | CB  | . LEU LEU LEU A A 339 339 . | 0.1040 | 0.0764 | 0.0891 | 0.0009  | -0.0085 | - |
| 0.0193 | 1   | .   |                             |        |        |        |         |         |   |
| 2589   | CG  | CG  | . LEU LEU LEU A A 339 339 . | 0.1456 | 0.0997 | 0.0794 | -0.0136 | 0.0176  | - |
| 0.0265 | 1   | .   |                             |        |        |        |         |         |   |
| 2590   | CD1 | CD1 | . LEU LEU LEU A A 339 339 . | 0.1022 | 0.1116 | 0.1264 | 0.0149  | -0.0035 |   |
| 0.0005 | 1   | .   |                             |        |        |        |         |         |   |
| 2591   | CD2 | CD2 | . LEU LEU LEU A A 339 339 . | 0.1228 | 0.0908 | 0.1116 | -0.0241 | -0.0027 | - |
| 0.0024 | 1   | .   |                             |        |        |        |         |         |   |
| 2592   | C   | C   | . LEU LEU LEU A A 339 339 . | 0.0952 | 0.0842 | 0.0670 | 0.0181  | 0.0049  |   |
| 0.0262 | 1   | .   |                             |        |        |        |         |         |   |
| 2593   | O   | O   | . LEU LEU LEU A A 339 339 . | 0.1116 | 0.1044 | 0.0785 | 0.0102  | -0.0001 |   |
| 0.0205 | 1   | .   |                             |        |        |        |         |         |   |
| 2594   | N   | N   | . LEU LEU LEU A A 340 340 . | 0.1102 | 0.0848 | 0.0869 | 0.0231  | -0.0085 |   |
| 0.0131 | 1   | .   |                             |        |        |        |         |         |   |
| 2595   | CA  | CA  | . LEU LEU LEU A A 340 340 . | 0.0763 | 0.1026 | 0.0680 | 0.0009  | -0.0170 |   |
| 0.0165 | 1   | .   |                             |        |        |        |         |         |   |
| 2596   | CB  | CB  | . LEU LEU LEU A A 340 340 . | 0.0784 | 0.0958 | 0.0406 | 0.0009  | -0.0236 |   |
| 0.0129 | 1   | .   |                             |        |        |        |         |         |   |
| 2597   | CG  | CG  | . LEU LEU LEU A A 340 340 . | 0.0966 | 0.0729 | 0.0762 | 0.0034  | 0.0090  |   |
| 0.0187 | 1   | .   |                             |        |        |        |         |         |   |
| 2598   | CD1 | CD1 | . LEU LEU LEU A A 340 340 . | 0.0942 | 0.0726 | 0.1185 | -0.0102 | 0.0258  | - |
| 0.0117 | 1   | .   |                             |        |        |        |         |         |   |
| 2599   | CD2 | CD2 | . LEU LEU LEU A A 340 340 . | 0.0830 | 0.1294 | 0.0790 | -0.0051 | 0.0078  |   |
| 0.0044 | 1   | .   |                             |        |        |        |         |         |   |
| 2600   | C   | C   | . LEU LEU LEU A A 340 340 . | 0.0940 | 0.0930 | 0.0885 | 0.0124  | -0.0028 |   |
| 0.0039 | 1   | .   |                             |        |        |        |         |         |   |
| 2601   | O   | O   | . LEU LEU LEU A A 340 340 . | 0.1113 | 0.1076 | 0.1163 | 0.0097  | 0.0015  | - |
| 0.0014 | 1   | .   |                             |        |        |        |         |         |   |
| 2602   | N   | N   | . LEU LEU LEU A A 341 341 . | 0.0897 | 0.1088 | 0.0756 | -0.0102 | -0.0079 | - |
| 0.0016 | 1   | .   |                             |        |        |        |         |         |   |

|        |     |     |                             |        |        |        |         |         |   |
|--------|-----|-----|-----------------------------|--------|--------|--------|---------|---------|---|
| 2603   | CA  | CA  | . LEU LEU LEU A A 341 341 . | 0.0972 | 0.0916 | 0.0742 | -0.0069 | -0.0021 |   |
| 0.0075 | 1   | .   |                             |        |        |        |         |         |   |
| 2604   | CB  | CB  | . LEU LEU LEU A A 341 341 . | 0.0916 | 0.0996 | 0.0792 | -0.0150 | 0.0129  |   |
| 0.0056 | 1   | .   |                             |        |        |        |         |         |   |
| 2605   | CG  | CG  | . LEU LEU LEU A A 341 341 . | 0.1041 | 0.0794 | 0.1348 | 0.0065  | -0.0185 |   |
| 0.0303 | 1   | .   |                             |        |        |        |         |         |   |
| 2606   | CD1 | CD1 | . LEU LEU LEU A A 341 341 . | 0.1852 | 0.1540 | 0.1160 | 0.0032  | -0.0347 |   |
| 0.0597 | 1   | .   |                             |        |        |        |         |         |   |
| 2607   | CD2 | CD2 | . LEU LEU LEU A A 341 341 . | 0.1253 | 0.1696 | 0.1671 | 0.0465  | 0.0316  | - |
| 0.0046 | 1   | .   |                             |        |        |        |         |         |   |
| 2608   | C   | C   | . LEU LEU LEU A A 341 341 . | 0.0973 | 0.0835 | 0.0771 | 0.0087  | -0.0002 |   |
| 0.0009 | 1   | .   |                             |        |        |        |         |         |   |
| 2609   | O   | O   | . LEU LEU LEU A A 341 341 . | 0.1262 | 0.0979 | 0.1104 | 0.0025  | -0.0042 |   |
| 0.0010 | 1   | .   |                             |        |        |        |         |         |   |
| 2610   | N   | N   | . LYS LYS LYS A A 342 342 . | 0.1327 | 0.0959 | 0.0904 | 0.0020  | -0.0103 | - |
| 0.0071 | 1   | .   |                             |        |        |        |         |         |   |
| 2611   | CA  | CA  | . LYS LYS LYS A A 342 342 . | 0.0890 | 0.1116 | 0.0747 | -0.0100 | 0.0037  | - |
| 0.0032 | 1   | .   |                             |        |        |        |         |         |   |
| 2612   | CB  | CB  | . LYS LYS LYS A A 342 342 . | 0.0969 | 0.1154 | 0.1398 | -0.0002 | 0.0115  | - |
| 0.0182 | 1   | .   |                             |        |        |        |         |         |   |
| 2613   | CG  | CG  | . LYS LYS LYS A A 342 342 . | 0.1159 | 0.1329 | 0.1423 | -0.0017 | -0.0014 |   |
| 0.0024 | 1   | .   |                             |        |        |        |         |         |   |
| 2614   | CD  | CD  | . LYS LYS LYS A A 342 342 . | 0.1302 | 0.1239 | 0.1549 | 0.0109  | -0.0109 |   |
| 0.0136 | 1   | .   |                             |        |        |        |         |         |   |
| 2615   | CE  | CE  | . LYS LYS LYS A A 342 342 . | 0.1534 | 0.1723 | 0.0995 | -0.0184 | -0.0277 | - |
| 0.0002 | 1   | .   |                             |        |        |        |         |         |   |
| 2616   | NZ  | NZ  | . LYS LYS LYS A A 342 342 . | 0.1446 | 0.1700 | 0.1891 | -0.0131 | -0.0323 |   |
| 0.0316 | 1   | .   |                             |        |        |        |         |         |   |
| 2617   | C   | C   | . LYS LYS LYS A A 342 342 . | 0.1107 | 0.1037 | 0.0998 | 0.0146  | 0.0009  | - |
| 0.0005 | 1   | .   |                             |        |        |        |         |         |   |
| 2618   | O   | O   | . LYS LYS LYS A A 342 342 . | 0.1199 | 0.1131 | 0.1217 | 0.0220  | -0.0154 | - |
| 0.0020 | 1   | .   |                             |        |        |        |         |         |   |
| 2619   | N   | N   | . VAL VAL VAL A A 343 343 . | 0.1033 | 0.1048 | 0.0969 | -0.0010 | -0.0122 |   |
| 0.0019 | 1   | .   |                             |        |        |        |         |         |   |
| 2620   | CA  | CA  | . VAL VAL VAL A A 343 343 . | 0.1117 | 0.0924 | 0.0696 | 0.0147  | -0.0004 |   |
| 0.0059 | 1   | .   |                             |        |        |        |         |         |   |
| 2621   | CB  | CB  | . VAL VAL VAL A A 343 343 . | 0.1079 | 0.1074 | 0.1089 | 0.0280  | 0.0081  | - |
| 0.0063 | 1   | .   |                             |        |        |        |         |         |   |
| 2622   | CG1 | CG1 | . VAL VAL VAL A A 343 343 . | 0.1256 | 0.1436 | 0.0786 | 0.0066  | 0.0360  | - |
| 0.0110 | 1   | .   |                             |        |        |        |         |         |   |
| 2623   | CG2 | CG2 | . VAL VAL VAL A A 343 343 . | 0.1125 | 0.1286 | 0.1302 | -0.0070 | 0.0021  |   |
| 0.0323 | 1   | .   |                             |        |        |        |         |         |   |
| 2624   | C   | C   | . VAL VAL VAL A A 343 343 . | 0.1048 | 0.0986 | 0.0927 | 0.0126  | 0.0062  |   |
| 0.0137 | 1   | .   |                             |        |        |        |         |         |   |
| 2625   | O   | O   | . VAL VAL VAL A A 343 343 . | 0.1367 | 0.1061 | 0.1035 | -0.0061 | 0.0159  |   |
| 0.0085 | 1   | .   |                             |        |        |        |         |         |   |
| 2626   | N   | N   | . ASN ASN ASN A A 344 344 . | 0.0953 | 0.1077 | 0.1028 | 0.0000  | 0.0121  |   |
| 0.0060 | 1   | .   |                             |        |        |        |         |         |   |
| 2627   | CA  | CA  | . ASN ASN ASN A A 344 344 . | 0.0906 | 0.0960 | 0.0759 | 0.0131  | 0.0146  |   |
| 0.0143 | 1   | .   |                             |        |        |        |         |         |   |
| 2628   | CB  | CB  | . ASN ASN ASN A A 344 344 . | 0.0846 | 0.0863 | 0.0663 | -0.0112 | 0.0075  |   |
| 0.0009 | 1   | .   |                             |        |        |        |         |         |   |
| 2629   | CG  | CG  | . ASN ASN ASN A A 344 344 . | 0.0933 | 0.0812 | 0.0733 | -0.0049 | 0.0053  | - |
| 0.0070 | 1   | .   |                             |        |        |        |         |         |   |
| 2630   | OD1 | OD1 | . ASN ASN ASN A A 344 344 . | 0.1003 | 0.0893 | 0.1247 | -0.0004 | 0.0024  | - |
| 0.0056 | 1   | .   |                             |        |        |        |         |         |   |
| 2631   | ND2 | ND2 | . ASN ASN ASN A A 344 344 . | 0.1168 | 0.0884 | 0.0943 | 0.0238  | 0.0065  |   |
| 0.0165 | 1   | .   |                             |        |        |        |         |         |   |
| 2632   | C   | C   | . ASN ASN ASN A A 344 344 . | 0.0960 | 0.1045 | 0.0930 | 0.0019  | -0.0029 | - |
| 0.0074 | 1   | .   |                             |        |        |        |         |         |   |

|        |     |     |                             |        |        |        |         |         |   |
|--------|-----|-----|-----------------------------|--------|--------|--------|---------|---------|---|
| 2633   | O   | O   | . ASN ASN ASN A A 344 344 . | 0.1354 | 0.1179 | 0.1046 | 0.0372  | 0.0109  | - |
| 0.0053 | 1   | .   |                             |        |        |        |         |         |   |
| 2634   | N   | N   | . GLN GLN GLN A A 345 345 . | 0.0884 | 0.0964 | 0.0723 | 0.0095  | -0.0001 |   |
| 0.0034 | 1   | .   |                             |        |        |        |         |         |   |
| 2635   | CA  | CA  | . GLN GLN GLN A A 345 345 . | 0.0979 | 0.0904 | 0.0906 | 0.0020  | -0.0239 |   |
| 0.0083 | 1   | .   |                             |        |        |        |         |         |   |
| 2636   | CB  | CB  | . GLN GLN GLN A A 345 345 . | 0.1017 | 0.1046 | 0.0994 | -0.0085 | -0.0329 |   |
| 0.0109 | 1   | .   |                             |        |        |        |         |         |   |
| 2637   | CG  | CG  | . GLN GLN GLN A A 345 345 . | 0.1060 | 0.0666 | 0.1236 | -0.0078 | -0.0270 | - |
| 0.0026 | 1   | .   |                             |        |        |        |         |         |   |
| 2638   | CD  | CD  | . GLN GLN GLN A A 345 345 . | 0.0876 | 0.0916 | 0.0769 | -0.0080 | -0.0083 | - |
| 0.0165 | 1   | .   |                             |        |        |        |         |         |   |
| 2639   | OE1 | OE1 | . GLN GLN GLN A A 345 345 . | 0.0902 | 0.1168 | 0.0960 | 0.0051  | -0.0114 |   |
| 0.0244 | 1   | .   |                             |        |        |        |         |         |   |
| 2640   | NE2 | NE2 | . GLN GLN GLN A A 345 345 . | 0.1070 | 0.1187 | 0.1301 | -0.0146 | -0.0051 |   |
| 0.0189 | 1   | .   |                             |        |        |        |         |         |   |
| 2641   | C   | C   | . GLN GLN GLN A A 345 345 . | 0.1054 | 0.1150 | 0.0933 | 0.0037  | -0.0056 |   |
| 0.0186 | 1   | .   |                             |        |        |        |         |         |   |
| 2642   | O   | O   | . GLN GLN GLN A A 345 345 . | 0.1114 | 0.1228 | 0.1312 | 0.0050  | 0.0022  |   |
| 0.0039 | 1   | .   |                             |        |        |        |         |         |   |
| 2643   | N   | N   | . ILE ILE ILE A A 346 346 . | 0.0990 | 0.0831 | 0.1114 | -0.0035 | -0.0039 |   |
| 0.0019 | 1   | .   |                             |        |        |        |         |         |   |
| 2644   | CA  | CA  | . ILE ILE ILE A A 346 346 . | 0.1039 | 0.1039 | 0.0922 | -0.0043 | 0.0027  |   |
| 0.0147 | 1   | .   |                             |        |        |        |         |         |   |
| 2645   | CB  | CB  | . ILE ILE ILE A A 346 346 . | 0.1189 | 0.0948 | 0.0885 | 0.0064  | -0.0010 |   |
| 0.0052 | 1   | .   |                             |        |        |        |         |         |   |
| 2646   | CG1 | CG1 | . ILE ILE ILE A A 346 346 . | 0.1373 | 0.1338 | 0.1421 | 0.0143  | 0.0152  |   |
| 0.0377 | 1   | .   |                             |        |        |        |         |         |   |
| 2647   | CD  | CD  | . ILE ILE ILE A A 346 346 . | 0.1469 | 0.1513 | 0.1510 | 0.0295  | -0.0365 |   |
| 0.0149 | 1   | .   |                             |        |        |        |         |         |   |
| 2648   | CG2 | CG2 | . ILE ILE ILE A A 346 346 . | 0.1180 | 0.1353 | 0.1098 | 0.0239  | 0.0305  |   |
| 0.0050 | 1   | .   |                             |        |        |        |         |         |   |
| 2649   | C   | C   | . ILE ILE ILE A A 346 346 . | 0.1050 | 0.0931 | 0.1116 | 0.0155  | -0.0152 |   |
| 0.0004 | 1   | .   |                             |        |        |        |         |         |   |
| 2650   | O   | O   | . ILE ILE ILE A A 346 346 . | 0.1412 | 0.1038 | 0.1336 | -0.0056 | -0.0046 |   |
| 0.0035 | 1   | .   |                             |        |        |        |         |         |   |
| 2651   | N   | N   | . GLY GLY GLY A A 347 347 . | 0.0958 | 0.1026 | 0.0841 | 0.0097  | -0.0181 |   |
| 0.0034 | 1   | .   |                             |        |        |        |         |         |   |
| 2652   | CA  | CA  | . GLY GLY GLY A A 347 347 . | 0.1220 | 0.1192 | 0.1189 | -0.0102 | -0.0019 |   |
| 0.0042 | 1   | .   |                             |        |        |        |         |         |   |
| 2653   | C   | C   | . GLY GLY GLY A A 347 347 . | 0.1219 | 0.1019 | 0.1198 | -0.0015 | -0.0048 |   |
| 0.0030 | 1   | .   |                             |        |        |        |         |         |   |
| 2654   | O   | O   | . GLY GLY GLY A A 347 347 . | 0.1175 | 0.1201 | 0.1082 | -0.0192 | 0.0003  |   |
| 0.0054 | 1   | .   |                             |        |        |        |         |         |   |
| 2655   | N   | N   | . SER SER SER A A 348 348 . | 0.1098 | 0.1160 | 0.1245 | -0.0067 | 0.0028  |   |
| 0.0101 | 1   | .   |                             |        |        |        |         |         |   |
| 2656   | CA  | CA  | . SER SER SER A A 348 348 . | 0.1155 | 0.0998 | 0.1135 | -0.0046 | 0.0148  |   |
| 0.0029 | 1   | .   |                             |        |        |        |         |         |   |
| 2657   | CB  | CB  | . SER SER SER A A 348 348 . | 0.1223 | 0.1272 | 0.1293 | 0.0087  | -0.0030 |   |
| 0.0236 | 1   | .   |                             |        |        |        |         |         |   |
| 2658   | OG  | OG  | . SER SER SER A A 348 348 . | 0.1516 | 0.1344 | 0.0993 | -0.0224 | -0.0187 |   |
| 0.0046 | 1   | .   |                             |        |        |        |         |         |   |
| 2659   | C   | C   | . SER SER SER A A 348 348 . | 0.1186 | 0.0950 | 0.1047 | -0.0030 | -0.0005 |   |
| 0.0108 | 1   | .   |                             |        |        |        |         |         |   |
| 2660   | O   | O   | . SER SER SER A A 348 348 . | 0.1199 | 0.1230 | 0.1227 | 0.0071  | -0.0258 |   |
| 0.0028 | 1   | .   |                             |        |        |        |         |         |   |
| 2661   | N   | N   | . VAL VAL VAL A A 349 349 . | 0.1230 | 0.0815 | 0.1231 | 0.0129  | 0.0072  | - |
| 0.0059 | 1   | .   |                             |        |        |        |         |         |   |
| 2662   | CA  | CA  | . VAL VAL VAL A A 349 349 . | 0.1384 | 0.1074 | 0.0827 | -0.0042 | 0.0185  |   |
| 0.0147 | 1   | .   |                             |        |        |        |         |         |   |







|        |     |     |                             |        |        |        |         |         |   |
|--------|-----|-----|-----------------------------|--------|--------|--------|---------|---------|---|
| 2723   | NZ  | NZ  | . LYS LYS LYS A A 357 357 . | 0.5053 | 0.4633 | 0.2457 | -0.0260 | -0.0314 |   |
| 0.0128 | 1   | .   |                             |        |        |        |         |         |   |
| 2724   | C   | C   | . LYS LYS LYS A A 357 357 . | 0.1233 | 0.1357 | 0.1159 | -0.0178 | 0.0109  | - |
| 0.0138 | 1   | .   |                             |        |        |        |         |         |   |
| 2725   | O   | O   | . LYS LYS LYS A A 357 357 . | 0.1646 | 0.1573 | 0.0973 | -0.0192 | 0.0028  | - |
| 0.0037 | 1   | .   |                             |        |        |        |         |         |   |
| 2726   | N   | N   | . LEU LEU LEU A A 358 358 . | 0.1429 | 0.1290 | 0.1296 | -0.0034 | 0.0160  |   |
| 0.0135 | 1   | .   |                             |        |        |        |         |         |   |
| 2727   | CA  | CA  | . LEU LEU LEU A A 358 358 . | 0.1567 | 0.1367 | 0.1253 | -0.0075 | 0.0174  |   |
| 0.0062 | 1   | .   |                             |        |        |        |         |         |   |
| 2728   | CB  | CB  | . LEU LEU LEU A A 358 358 . | 0.1490 | 0.1149 | 0.1396 | -0.0006 | 0.0231  |   |
| 0.0017 | 1   | .   |                             |        |        |        |         |         |   |
| 2729   | CG  | CG  | . LEU LEU LEU A A 358 358 . | 0.1820 | 0.1841 | 0.1672 | -0.0063 | 0.0145  | - |
| 0.0010 | 1   | .   |                             |        |        |        |         |         |   |
| 2730   | CD1 | CD1 | . LEU LEU LEU A A 358 358 . | 0.2646 | 0.2596 | 0.1491 | 0.0164  | -0.0072 |   |
| 0.0421 | 1   | .   |                             |        |        |        |         |         |   |
| 2731   | CD2 | CD2 | . LEU LEU LEU A A 358 358 . | 0.2133 | 0.2064 | 0.2117 | 0.0070  | 0.0041  | - |
| 0.0049 | 1   | .   |                             |        |        |        |         |         |   |
| 2732   | C   | C   | . LEU LEU LEU A A 358 358 . | 0.1575 | 0.1370 | 0.1272 | -0.0083 | -0.0121 | - |
| 0.0036 | 1   | .   |                             |        |        |        |         |         |   |
| 2733   | O   | O   | . LEU LEU LEU A A 358 358 . | 0.2092 | 0.1693 | 0.1078 | 0.0021  | -0.0074 |   |
| 0.0151 | 1   | .   |                             |        |        |        |         |         |   |
| 2734   | N   | N   | . ALA ALA ALA A A 359 359 . | 0.1593 | 0.1264 | 0.1255 | -0.0157 | 0.0085  | - |
| 0.0039 | 1   | .   |                             |        |        |        |         |         |   |
| 2735   | CA  | CA  | . ALA ALA ALA A A 359 359 . | 0.1260 | 0.1384 | 0.1135 | -0.0129 | 0.0150  |   |
| 0.0050 | 1   | .   |                             |        |        |        |         |         |   |
| 2736   | CB  | CB  | . ALA ALA ALA A A 359 359 . | 0.1415 | 0.1390 | 0.0672 | -0.0162 | -0.0058 |   |
| 0.0186 | 1   | .   |                             |        |        |        |         |         |   |
| 2737   | C   | C   | . ALA ALA ALA A A 359 359 . | 0.1332 | 0.1422 | 0.1087 | -0.0134 | 0.0017  | - |
| 0.0011 | 1   | .   |                             |        |        |        |         |         |   |
| 2738   | O   | O   | . ALA ALA ALA A A 359 359 . | 0.1899 | 0.1561 | 0.1100 | -0.0216 | -0.0028 |   |
| 0.0112 | 1   | .   |                             |        |        |        |         |         |   |
| 2739   | N   | N   | . GLN GLN GLN A A 360 360 . | 0.1328 | 0.1374 | 0.1223 | -0.0059 | 0.0151  | - |
| 0.0040 | 1   | .   |                             |        |        |        |         |         |   |
| 2740   | CA  | CA  | . GLN GLN GLN A A 360 360 . | 0.1446 | 0.1394 | 0.1076 | -0.0058 | 0.0142  |   |
| 0.0028 | 1   | .   |                             |        |        |        |         |         |   |
| 2741   | CB  | CB  | . GLN GLN GLN A A 360 360 . | 0.1449 | 0.1526 | 0.1230 | 0.0083  | 0.0079  |   |
| 0.0175 | 1   | .   |                             |        |        |        |         |         |   |
| 2742   | CG  | CG  | . GLN GLN GLN A A 360 360 . | 0.1663 | 0.1313 | 0.1160 | 0.0221  | 0.0322  |   |
| 0.0302 | 1   | .   |                             |        |        |        |         |         |   |
| 2743   | CD  | CD  | . GLN GLN GLN A A 360 360 . | 0.1801 | 0.1759 | 0.1451 | 0.0151  | 0.0045  |   |
| 0.0321 | 1   | .   |                             |        |        |        |         |         |   |
| 2744   | OE1 | OE1 | . GLN GLN GLN A A 360 360 . | 0.3014 | 0.1925 | 0.1869 | 0.0400  | -0.0032 |   |
| 0.0375 | 1   | .   |                             |        |        |        |         |         |   |
| 2745   | NE2 | NE2 | . GLN GLN GLN A A 360 360 . | 0.1637 | 0.1582 | 0.1461 | -0.0086 | 0.0026  |   |
| 0.0070 | 1   | .   |                             |        |        |        |         |         |   |
| 2746   | C   | C   | . GLN GLN GLN A A 360 360 . | 0.1747 | 0.1497 | 0.1130 | -0.0048 | 0.0068  | - |
| 0.0010 | 1   | .   |                             |        |        |        |         |         |   |
| 2747   | O   | O   | . GLN GLN GLN A A 360 360 . | 0.1920 | 0.1641 | 0.1213 | -0.0058 | 0.0068  | - |
| 0.0231 | 1   | .   |                             |        |        |        |         |         |   |
| 2748   | N   | N   | . GLU GLU GLU A A 361 361 . | 0.1767 | 0.1752 | 0.1156 | -0.0103 | 0.0012  |   |
| 0.0132 | 1   | .   |                             |        |        |        |         |         |   |
| 2749   | CA  | CA  | . GLU GLU GLU A A 361 361 . | 0.2434 | 0.1952 | 0.1279 | -0.0151 | -0.0070 |   |
| 0.0155 | 1   | .   |                             |        |        |        |         |         |   |
| 2750   | CB  | CB  | . GLU GLU GLU A A 361 361 . | 0.2680 | 0.2289 | 0.1670 | -0.0407 | -0.0119 |   |
| 0.0537 | 1   | .   |                             |        |        |        |         |         |   |
| 2751   | CG  | CG  | . GLU GLU GLU A A 361 361 . | 0.3418 | 0.3261 | 0.3635 | -0.0286 | -0.0168 |   |
| 0.0394 | 1   | .   |                             |        |        |        |         |         |   |
| 2752   | CD  | CD  | . GLU GLU GLU A A 361 361 . | 0.4622 | 0.3872 | 0.5177 | -0.0494 | -0.0158 | - |
| 0.0084 | 1   | .   |                             |        |        |        |         |         |   |

|        |     |     |                             |        |        |        |         |         |   |
|--------|-----|-----|-----------------------------|--------|--------|--------|---------|---------|---|
| 2753   | OE1 | OE1 | . GLU GLU GLU A A 361 361 . | 0.5740 | 0.3955 | 0.6140 | -0.0159 | -0.0249 |   |
| 0.0332 | 1   | .   |                             |        |        |        |         |         |   |
| 2754   | OE2 | OE2 | . GLU GLU GLU A A 361 361 . | 0.4694 | 0.4695 | 0.5659 | -0.0392 | -0.0421 |   |
| 0.0068 | 1   | .   |                             |        |        |        |         |         |   |
| 2755   | C   | C   | . GLU GLU GLU A A 361 361 . | 0.2026 | 0.2132 | 0.1446 | -0.0142 | 0.0101  |   |
| 0.0125 | 1   | .   |                             |        |        |        |         |         |   |
| 2756   | O   | O   | . GLU GLU GLU A A 361 361 . | 0.2454 | 0.2184 | 0.1205 | -0.0112 | 0.0012  | - |
| 0.0007 | 1   | .   |                             |        |        |        |         |         |   |
| 2757   | N   | N   | . ASN ASN ASN A A 362 362 . | 0.1689 | 0.1978 | 0.1361 | -0.0203 | -0.0169 |   |
| 0.0072 | 1   | .   |                             |        |        |        |         |         |   |
| 2758   | CA  | CA  | . ASN ASN ASN A A 362 362 . | 0.1782 | 0.1939 | 0.1479 | -0.0003 | -0.0044 |   |
| 0.0032 | 1   | .   |                             |        |        |        |         |         |   |
| 2759   | CB  | CB  | . ASN ASN ASN A A 362 362 . | 0.2019 | 0.1998 | 0.1587 | 0.0195  | -0.0125 |   |
| 0.0199 | 1   | .   |                             |        |        |        |         |         |   |
| 2760   | CG  | CG  | . ASN ASN ASN A A 362 362 . | 0.2492 | 0.1795 | 0.1951 | 0.0159  | -0.0621 |   |
| 0.0268 | 1   | .   |                             |        |        |        |         |         |   |
| 2761   | OD1 | OD1 | . ASN ASN ASN A A 362 362 . | 0.3557 | 0.3059 | 0.1321 | 0.0475  | -0.0819 |   |
| 0.0738 | 1   | .   |                             |        |        |        |         |         |   |
| 2762   | ND2 | ND2 | . ASN ASN ASN A A 362 362 . | 0.2695 | 0.2558 | 0.1698 | 0.0149  | -0.0706 |   |
| 0.0308 | 1   | .   |                             |        |        |        |         |         |   |
| 2763   | C   | C   | . ASN ASN ASN A A 362 362 . | 0.1744 | 0.1839 | 0.1252 | -0.0134 | -0.0031 |   |
| 0.0083 | 1   | .   |                             |        |        |        |         |         |   |
| 2764   | O   | O   | . ASN ASN ASN A A 362 362 . | 0.1978 | 0.2398 | 0.1601 | -0.0399 | -0.0238 |   |
| 0.0217 | 1   | .   |                             |        |        |        |         |         |   |
| 2765   | N   | N   | . GLY GLY GLY A A 363 363 . | 0.2011 | 0.1814 | 0.1205 | -0.0160 | 0.0204  |   |
| 0.0055 | 1   | .   |                             |        |        |        |         |         |   |
| 2766   | CA  | CA  | . GLY GLY GLY A A 363 363 . | 0.2008 | 0.1735 | 0.1193 | -0.0302 | 0.0352  |   |
| 0.0092 | 1   | .   |                             |        |        |        |         |         |   |
| 2767   | C   | C   | . GLY GLY GLY A A 363 363 . | 0.2208 | 0.1888 | 0.1420 | -0.0236 | 0.0262  |   |
| 0.0009 | 1   | .   |                             |        |        |        |         |         |   |
| 2768   | O   | O   | . GLY GLY GLY A A 363 363 . | 0.2530 | 0.2173 | 0.1374 | -0.0288 | 0.0388  | - |
| 0.0025 | 1   | .   |                             |        |        |        |         |         |   |
| 2769   | N   | N   | . TRP TRP TRP A A 364 364 . | 0.1574 | 0.1464 | 0.1288 | 0.0006  | 0.0044  | - |
| 0.0054 | 1   | .   |                             |        |        |        |         |         |   |
| 2770   | CA  | CA  | . TRP TRP TRP A A 364 364 . | 0.1487 | 0.1370 | 0.1340 | 0.0180  | 0.0043  |   |
| 0.0117 | 1   | .   |                             |        |        |        |         |         |   |
| 2771   | CB  | CB  | . TRP TRP TRP A A 364 364 . | 0.1330 | 0.1331 | 0.1442 | 0.0028  | -0.0019 |   |
| 0.0083 | 1   | .   |                             |        |        |        |         |         |   |
| 2772   | CG  | CG  | . TRP TRP TRP A A 364 364 . | 0.1243 | 0.1306 | 0.0970 | -0.0067 | -0.0062 |   |
| 0.0286 | 1   | .   |                             |        |        |        |         |         |   |
| 2773   | CD1 | CD1 | . TRP TRP TRP A A 364 364 . | 0.1721 | 0.2035 | 0.1536 | 0.0151  | -0.0110 |   |
| 0.0109 | 1   | .   |                             |        |        |        |         |         |   |
| 2774   | NE1 | NE1 | . TRP TRP TRP A A 364 364 . | 0.2045 | 0.1668 | 0.1221 | 0.0058  | 0.0091  | - |
| 0.0133 | 1   | .   |                             |        |        |        |         |         |   |
| 2775   | CE2 | CE2 | . TRP TRP TRP A A 364 364 . | 0.1368 | 0.1589 | 0.1149 | 0.0045  | 0.0085  |   |
| 0.0200 | 1   | .   |                             |        |        |        |         |         |   |
| 2776   | CD2 | CD2 | . TRP TRP TRP A A 364 364 . | 0.1264 | 0.1453 | 0.1045 | -0.0047 | -0.0072 |   |
| 0.0125 | 1   | .   |                             |        |        |        |         |         |   |
| 2777   | CE3 | CE3 | . TRP TRP TRP A A 364 364 . | 0.1782 | 0.1754 | 0.0868 | -0.0124 | 0.0230  | - |
| 0.0156 | 1   | .   |                             |        |        |        |         |         |   |
| 2778   | CZ3 | CZ3 | . TRP TRP TRP A A 364 364 . | 0.1398 | 0.1442 | 0.1377 | 0.0139  | 0.0310  |   |
| 0.0401 | 1   | .   |                             |        |        |        |         |         |   |
| 2779   | CH2 | CH2 | . TRP TRP TRP A A 364 364 . | 0.1813 | 0.1567 | 0.1488 | 0.0415  | -0.0099 | - |
| 0.0168 | 1   | .   |                             |        |        |        |         |         |   |
| 2780   | CZ2 | CZ2 | . TRP TRP TRP A A 364 364 . | 0.1471 | 0.1197 | 0.1392 | -0.0038 | -0.0179 | - |
| 0.0088 | 1   | .   |                             |        |        |        |         |         |   |
| 2781   | C   | C   | . TRP TRP TRP A A 364 364 . | 0.1509 | 0.1547 | 0.1306 | 0.0068  | 0.0025  | - |
| 0.0064 | 1   | .   |                             |        |        |        |         |         |   |
| 2782   | O   | O   | . TRP TRP TRP A A 364 364 . | 0.1520 | 0.1749 | 0.1536 | -0.0030 | 0.0038  |   |
| 0.0078 | 1   | .   |                             |        |        |        |         |         |   |

|        |     |     |                             |        |        |        |         |         |   |
|--------|-----|-----|-----------------------------|--------|--------|--------|---------|---------|---|
| 2783   | N   | N   | . GLY GLY GLY A A 365 365 . | 0.1376 | 0.1494 | 0.1116 | 0.0165  | -0.0047 |   |
| 0.0018 | 1   | .   |                             |        |        |        |         |         |   |
| 2784   | CA  | CA  | . GLY GLY GLY A A 365 365 . | 0.1521 | 0.1477 | 0.0904 | 0.0231  | 0.0080  | - |
| 0.0126 | 1   | .   |                             |        |        |        |         |         |   |
| 2785   | C   | C   | . GLY GLY GLY A A 365 365 . | 0.1237 | 0.1359 | 0.1191 | 0.0008  | 0.0068  | - |
| 0.0020 | 1   | .   |                             |        |        |        |         |         |   |
| 2786   | O   | O   | . GLY GLY GLY A A 365 365 . | 0.1153 | 0.1339 | 0.0841 | 0.0014  | 0.0173  |   |
| 0.0260 | 1   | .   |                             |        |        |        |         |         |   |
| 2787   | N   | N   | . VAL VAL VAL A A 366 366 . | 0.1133 | 0.1347 | 0.0947 | 0.0126  | -0.0210 | - |
| 0.0060 | 1   | .   |                             |        |        |        |         |         |   |
| 2788   | CA  | CA  | . VAL VAL VAL A A 366 366 . | 0.1188 | 0.1185 | 0.0830 | -0.0001 | -0.0055 | - |
| 0.0010 | 1   | .   |                             |        |        |        |         |         |   |
| 2789   | CB  | CB  | . VAL VAL VAL A A 366 366 . | 0.1221 | 0.0876 | 0.0753 | -0.0056 | -0.0124 |   |
| 0.0007 | 1   | .   |                             |        |        |        |         |         |   |
| 2790   | CG1 | CG1 | . VAL VAL VAL A A 366 366 . | 0.1115 | 0.1153 | 0.0720 | -0.0088 | -0.0219 | - |
| 0.0141 | 1   | .   |                             |        |        |        |         |         |   |
| 2791   | CG2 | CG2 | . VAL VAL VAL A A 366 366 . | 0.1126 | 0.1054 | 0.1399 | 0.0007  | 0.0088  |   |
| 0.0221 | 1   | .   |                             |        |        |        |         |         |   |
| 2792   | C   | C   | . VAL VAL VAL A A 366 366 . | 0.0846 | 0.0939 | 0.0715 | -0.0011 | 0.0015  | - |
| 0.0045 | 1   | .   |                             |        |        |        |         |         |   |
| 2793   | O   | O   | . VAL VAL VAL A A 366 366 . | 0.1242 | 0.1239 | 0.0761 | 0.0234  | -0.0006 |   |
| 0.0073 | 1   | .   |                             |        |        |        |         |         |   |
| 2794   | N   | N   | . MET MET MET A A 367 367 . | 0.0879 | 0.1092 | 0.0757 | 0.0002  | -0.0106 |   |
| 0.0036 | 1   | .   |                             |        |        |        |         |         |   |
| 2795   | CA  | CA  | . MET MET MET A A 367 367 . | 0.1030 | 0.0883 | 0.0723 | -0.0078 | -0.0221 |   |
| 0.0101 | 1   | .   |                             |        |        |        |         |         |   |
| 2796   | CB  | CB  | . MET MET MET A A 367 367 . | 0.1227 | 0.1001 | 0.0477 | -0.0145 | 0.0086  |   |
| 0.0128 | 1   | .   |                             |        |        |        |         |         |   |
| 2797   | CG  | CG  | . MET MET MET A A 367 367 . | 0.0958 | 0.1104 | 0.1074 | 0.0139  | -0.0125 |   |
| 0.0184 | 1   | .   |                             |        |        |        |         |         |   |
| 2798   | SD  | SD  | . MET MET MET A A 367 367 . | 0.1125 | 0.1206 | 0.1140 | -0.0034 | -0.0010 |   |
| 0.0069 | 1   | .   |                             |        |        |        |         |         |   |
| 2799   | CE  | CE  | . MET MET MET A A 367 367 . | 0.2196 | 0.1594 | 0.1922 | -0.0523 | 0.0137  | - |
| 0.0572 | 1   | .   |                             |        |        |        |         |         |   |
| 2800   | C   | C   | . MET MET MET A A 367 367 . | 0.0890 | 0.0840 | 0.0674 | 0.0033  | 0.0081  |   |
| 0.0113 | 1   | .   |                             |        |        |        |         |         |   |
| 2801   | O   | O   | . MET MET MET A A 367 367 . | 0.1060 | 0.1040 | 0.0842 | -0.0017 | 0.0024  |   |
| 0.0026 | 1   | .   |                             |        |        |        |         |         |   |
| 2802   | N   | N   | . VAL VAL VAL A A 368 368 . | 0.0929 | 0.0825 | 0.0846 | -0.0097 | -0.0096 | - |
| 0.0021 | 1   | .   |                             |        |        |        |         |         |   |
| 2803   | CA  | CA  | . VAL VAL VAL A A 368 368 . | 0.0996 | 0.1126 | 0.0648 | -0.0145 | -0.0121 |   |
| 0.0024 | 1   | .   |                             |        |        |        |         |         |   |
| 2804   | CB  | CB  | . VAL VAL VAL A A 368 368 . | 0.0897 | 0.1017 | 0.0619 | 0.0029  | -0.0087 |   |
| 0.0135 | 1   | .   |                             |        |        |        |         |         |   |
| 2805   | CG1 | CG1 | . VAL VAL VAL A A 368 368 . | 0.0910 | 0.1355 | 0.0872 | -0.0215 | 0.0084  | - |
| 0.0248 | 1   | .   |                             |        |        |        |         |         |   |
| 2806   | CG2 | CG2 | . VAL VAL VAL A A 368 368 . | 0.0725 | 0.1232 | 0.1247 | -0.0125 | 0.0124  |   |
| 0.0460 | 1   | .   |                             |        |        |        |         |         |   |
| 2807   | C   | C   | . VAL VAL VAL A A 368 368 . | 0.1035 | 0.0890 | 0.0759 | -0.0002 | -0.0053 | - |
| 0.0008 | 1   | .   |                             |        |        |        |         |         |   |
| 2808   | O   | O   | . VAL VAL VAL A A 368 368 . | 0.1099 | 0.0850 | 0.1024 | 0.0056  | 0.0017  |   |
| 0.0022 | 1   | .   |                             |        |        |        |         |         |   |
| 2809   | N   | N   | . SER SER SER A A 369 369 . | 0.0810 | 0.1065 | 0.0694 | -0.0118 | 0.0014  | - |
| 0.0074 | 1   | .   |                             |        |        |        |         |         |   |
| 2810   | CA  | CA  | . SER SER SER A A 369 369 . | 0.0948 | 0.1032 | 0.0967 | 0.0036  | -0.0015 |   |
| 0.0142 | 1   | .   |                             |        |        |        |         |         |   |
| 2811   | CB  | CB  | . SER SER SER A A 369 369 . | 0.0674 | 0.1026 | 0.0930 | -0.0074 | 0.0010  | - |
| 0.0044 | 1   | .   |                             |        |        |        |         |         |   |
| 2812   | OG  | OG  | . SER SER SER A A 369 369 . | 0.0961 | 0.1101 | 0.1036 | -0.0024 | -0.0002 |   |
| 0.0038 | 1   | .   |                             |        |        |        |         |         |   |

|        |     |     |                             |        |        |        |         |         |   |
|--------|-----|-----|-----------------------------|--------|--------|--------|---------|---------|---|
| 2813   | C   | C   | . SER SER SER A A 369 369 . | 0.0905 | 0.0722 | 0.0916 | 0.0041  | -0.0029 | - |
| 0.0076 | 1   | .   |                             |        |        |        |         |         |   |
| 2814   | O   | O   | . SER SER SER A A 369 369 . | 0.1166 | 0.0896 | 0.0887 | -0.0035 | 0.0129  |   |
| 0.0092 | 1   | .   |                             |        |        |        |         |         |   |
| 2815   | N   | N   | . HIS HIS HIS A A 370 370 . | 0.0931 | 0.0988 | 0.0828 | 0.0033  | 0.0188  | - |
| 0.0090 | 1   | .   |                             |        |        |        |         |         |   |
| 2816   | CA  | CA  | . HIS HIS HIS A A 370 370 . | 0.0797 | 0.0818 | 0.0827 | 0.0131  | -0.0059 |   |
| 0.0009 | 1   | .   |                             |        |        |        |         |         |   |
| 2817   | CB  | CB  | . HIS HIS HIS A A 370 370 . | 0.0829 | 0.0816 | 0.0845 | 0.0009  | -0.0103 |   |
| 0.0242 | 1   | .   |                             |        |        |        |         |         |   |
| 2818   | CG  | CG  | . HIS HIS HIS A A 370 370 . | 0.1079 | 0.0854 | 0.0648 | -0.0018 | -0.0001 |   |
| 0.0154 | 1   | .   |                             |        |        |        |         |         |   |
| 2819   | ND1 | ND1 | . HIS HIS HIS A A 370 370 . | 0.0890 | 0.0820 | 0.0716 | 0.0022  | 0.0098  |   |
| 0.0090 | 1   | .   |                             |        |        |        |         |         |   |
| 2820   | CE1 | CE1 | . HIS HIS HIS A A 370 370 . | 0.0980 | 0.1180 | 0.0908 | 0.0127  | -0.0011 | - |
| 0.0028 | 1   | .   |                             |        |        |        |         |         |   |
| 2821   | NE2 | NE2 | . HIS HIS HIS A A 370 370 . | 0.1242 | 0.0918 | 0.1053 | -0.0029 | -0.0101 |   |
| 0.0210 | 1   | .   |                             |        |        |        |         |         |   |
| 2822   | CD2 | CD2 | . HIS HIS HIS A A 370 370 . | 0.0639 | 0.0927 | 0.0952 | 0.0082  | 0.0149  | - |
| 0.0120 | 1   | .   |                             |        |        |        |         |         |   |
| 2823   | C   | C   | . HIS HIS HIS A A 370 370 . | 0.0572 | 0.0772 | 0.0809 | -0.0134 | 0.0005  |   |
| 0.0011 | 1   | .   |                             |        |        |        |         |         |   |
| 2824   | O   | O   | . HIS HIS HIS A A 370 370 . | 0.0880 | 0.0969 | 0.0724 | 0.0048  | 0.0044  | - |
| 0.0019 | 1   | .   |                             |        |        |        |         |         |   |
| 2825   | N   | N   | . ARG ARG ARG A A 371 371 . | 0.0790 | 0.0949 | 0.0690 | -0.0019 | 0.0228  |   |
| 0.0013 | 1   | .   |                             |        |        |        |         |         |   |
| 2826   | CA  | CA  | . ARG ARG ARG A A 371 371 . | 0.0682 | 0.0822 | 0.0697 | 0.0024  | 0.0123  | - |
| 0.0026 | 1   | .   |                             |        |        |        |         |         |   |
| 2827   | CB  | CB  | . ARG ARG ARG A A 371 371 . | 0.0805 | 0.0572 | 0.0758 | -0.0106 | 0.0224  |   |
| 0.0113 | 1   | .   |                             |        |        |        |         |         |   |
| 2828   | CG  | CG  | . ARG ARG ARG A A 371 371 . | 0.0981 | 0.0652 | 0.0656 | -0.0110 | -0.0104 |   |
| 0.0180 | 1   | .   |                             |        |        |        |         |         |   |
| 2829   | CD  | CD  | . ARG ARG ARG A A 371 371 . | 0.0401 | 0.0866 | 0.0951 | 0.0152  | -0.0270 |   |
| 0.0024 | 1   | .   |                             |        |        |        |         |         |   |
| 2830   | NE  | NE  | . ARG ARG ARG A A 371 371 . | 0.0810 | 0.0938 | 0.1013 | 0.0031  | -0.0082 |   |
| 0.0171 | 1   | .   |                             |        |        |        |         |         |   |
| 2831   | CZ  | CZ  | . ARG ARG ARG A A 371 371 . | 0.0905 | 0.0860 | 0.0921 | 0.0078  | 0.0017  | - |
| 0.0062 | 1   | .   |                             |        |        |        |         |         |   |
| 2832   | NH1 | NH1 | . ARG ARG ARG A A 371 371 . | 0.1088 | 0.0915 | 0.0994 | -0.0014 | 0.0014  | - |
| 0.0007 | 1   | .   |                             |        |        |        |         |         |   |
| 2833   | NH2 | NH2 | . ARG ARG ARG A A 371 371 . | 0.0910 | 0.1097 | 0.0902 | -0.0038 | 0.0063  |   |
| 0.0187 | 1   | .   |                             |        |        |        |         |         |   |
| 2834   | C   | C   | . ARG ARG ARG A A 371 371 . | 0.0908 | 0.0808 | 0.0708 | 0.0020  | 0.0039  | - |
| 0.0081 | 1   | .   |                             |        |        |        |         |         |   |
| 2835   | O   | O   | . ARG ARG ARG A A 371 371 . | 0.0786 | 0.0939 | 0.0814 | 0.0069  | -0.0107 |   |
| 0.0075 | 1   | .   |                             |        |        |        |         |         |   |
| 2836   | N   | N   | . SER SER SER A A 372 372 . | 0.0790 | 0.0669 | 0.0808 | 0.0107  | 0.0143  |   |
| 0.0078 | 1   | .   |                             |        |        |        |         |         |   |
| 2837   | CA  | CA  | . SER SER SER A A 372 372 . | 0.0831 | 0.0987 | 0.0823 | -0.0091 | 0.0053  |   |
| 0.0180 | 1   | .   |                             |        |        |        |         |         |   |
| 2838   | CB  | CB  | . SER SER SER A A 372 372 . | 0.0857 | 0.0749 | 0.1236 | 0.0012  | 0.0106  |   |
| 0.0008 | 1   | .   |                             |        |        |        |         |         |   |
| 2839   | OG  | OG  | . SER SER SER A A 372 372 . | 0.0788 | 0.0753 | 0.0956 | 0.0039  | 0.0153  | - |
| 0.0071 | 1   | .   |                             |        |        |        |         |         |   |
| 2840   | C   | C   | . SER SER SER A A 372 372 . | 0.0646 | 0.0952 | 0.1012 | 0.0000  | 0.0034  |   |
| 0.0072 | 1   | .   |                             |        |        |        |         |         |   |
| 2841   | O   | O   | . SER SER SER A A 372 372 . | 0.1032 | 0.0803 | 0.0921 | 0.0041  | 0.0047  |   |
| 0.0220 | 1   | .   |                             |        |        |        |         |         |   |
| 2842   | N   | N   | . GLY GLY GLY A A 373 373 . | 0.0878 | 0.0798 | 0.0796 | 0.0146  | -0.0030 | - |
| 0.0096 | 1   | .   |                             |        |        |        |         |         |   |



|        |     |     |                             |        |        |        |         |         |   |
|--------|-----|-----|-----------------------------|--------|--------|--------|---------|---------|---|
| 2873   | CB  | CB  | . ASP ASP ASP A A 377 377 . | 0.1327 | 0.1245 | 0.1112 | 0.0062  | 0.0167  |   |
| 0.0136 | 1   | .   |                             |        |        |        |         |         |   |
| 2874   | CG  | CG  | . ASP ASP ASP A A 377 377 . | 0.1678 | 0.1562 | 0.1276 | -0.0115 | 0.0068  |   |
| 0.0121 | 1   | .   |                             |        |        |        |         |         |   |
| 2875   | OD1 | OD1 | . ASP ASP ASP A A 377 377 . | 0.2236 | 0.1562 | 0.1720 | 0.0052  | 0.0380  | - |
| 0.0042 | 1   | .   |                             |        |        |        |         |         |   |
| 2876   | OD2 | OD2 | . ASP ASP ASP A A 377 377 . | 0.1665 | 0.1631 | 0.1781 | -0.0241 | 0.0527  | - |
| 0.0378 | 1   | .   |                             |        |        |        |         |         |   |
| 2877   | C   | C   | . ASP ASP ASP A A 377 377 . | 0.0867 | 0.0988 | 0.1192 | 0.0050  | -0.0033 | - |
| 0.0064 | 1   | .   |                             |        |        |        |         |         |   |
| 2878   | O   | O   | . ASP ASP ASP A A 377 377 . | 0.1232 | 0.1079 | 0.1168 | -0.0145 | 0.0125  | - |
| 0.0110 | 1   | .   |                             |        |        |        |         |         |   |
| 2879   | N   | N   | . THR THR THR A A 378 378 . | 0.1131 | 0.0907 | 0.1014 | -0.0033 | 0.0095  | - |
| 0.0143 | 1   | .   |                             |        |        |        |         |         |   |
| 2880   | CA  | CA  | . THR THR THR A A 378 378 . | 0.1224 | 0.0888 | 0.0909 | -0.0044 | 0.0084  | - |
| 0.0001 | 1   | .   |                             |        |        |        |         |         |   |
| 2881   | CB  | CB  | . THR THR THR A A 378 378 . | 0.1131 | 0.1202 | 0.0884 | -0.0072 | 0.0025  |   |
| 0.0027 | 1   | .   |                             |        |        |        |         |         |   |
| 2882   | OG1 | OG1 | . THR THR THR A A 378 378 . | 0.1235 | 0.1497 | 0.1354 | -0.0039 | -0.0056 |   |
| 0.0253 | 1   | .   |                             |        |        |        |         |         |   |
| 2883   | CG2 | CG2 | . THR THR THR A A 378 378 . | 0.1942 | 0.1422 | 0.1196 | -0.0138 | 0.0191  |   |
| 0.0228 | 1   | .   |                             |        |        |        |         |         |   |
| 2884   | C   | C   | . THR THR THR A A 378 378 . | 0.1162 | 0.0911 | 0.0912 | -0.0002 | 0.0017  |   |
| 0.0117 | 1   | .   |                             |        |        |        |         |         |   |
| 2885   | O   | O   | . THR THR THR A A 378 378 . | 0.1084 | 0.1085 | 0.0994 | -0.0029 | 0.0003  | - |
| 0.0046 | 1   | .   |                             |        |        |        |         |         |   |
| 2886   | N   | N   | . PHE PHE PHE A A 379 379 . | 0.0956 | 0.0866 | 0.0926 | -0.0189 | 0.0150  |   |
| 0.0084 | 1   | .   |                             |        |        |        |         |         |   |
| 2887   | CA  | CA  | . PHE PHE PHE A A 379 379 . | 0.0876 | 0.0773 | 0.0578 | -0.0052 | 0.0076  | - |
| 0.0004 | 1   | .   |                             |        |        |        |         |         |   |
| 2888   | CB  | CB  | . PHE PHE PHE A A 379 379 . | 0.0967 | 0.0768 | 0.0729 | -0.0109 | 0.0116  |   |
| 0.0029 | 1   | .   |                             |        |        |        |         |         |   |
| 2889   | CG  | CG  | . PHE PHE PHE A A 379 379 . | 0.1040 | 0.0892 | 0.0986 | -0.0026 | 0.0052  | - |
| 0.0140 | 1   | .   |                             |        |        |        |         |         |   |
| 2890   | CD1 | CD1 | . PHE PHE PHE A A 379 379 . | 0.1093 | 0.0919 | 0.0918 | 0.0058  | 0.0077  |   |
| 0.0011 | 1   | .   |                             |        |        |        |         |         |   |
| 2891   | CE1 | CE1 | . PHE PHE PHE A A 379 379 . | 0.1335 | 0.1161 | 0.1071 | -0.0114 | -0.0089 | - |
| 0.0294 | 1   | .   |                             |        |        |        |         |         |   |
| 2892   | CZ  | CZ  | . PHE PHE PHE A A 379 379 . | 0.1469 | 0.1288 | 0.1113 | 0.0014  | 0.0329  | - |
| 0.0181 | 1   | .   |                             |        |        |        |         |         |   |
| 2893   | CE2 | CE2 | . PHE PHE PHE A A 379 379 . | 0.1205 | 0.1414 | 0.1654 | 0.0043  | 0.0398  |   |
| 0.0116 | 1   | .   |                             |        |        |        |         |         |   |
| 2894   | CD2 | CD2 | . PHE PHE PHE A A 379 379 . | 0.1082 | 0.1391 | 0.1780 | -0.0028 | 0.0145  |   |
| 0.0307 | 1   | .   |                             |        |        |        |         |         |   |
| 2895   | C   | C   | . PHE PHE PHE A A 379 379 . | 0.0634 | 0.0986 | 0.0712 | -0.0282 | 0.0200  | - |
| 0.0040 | 1   | .   |                             |        |        |        |         |         |   |
| 2896   | O   | O   | . PHE PHE PHE A A 379 379 . | 0.0863 | 0.0906 | 0.0851 | -0.0144 | 0.0121  | - |
| 0.0107 | 1   | .   |                             |        |        |        |         |         |   |
| 2897   | N   | N   | . ILE ILE ILE A A 380 380 . | 0.0651 | 0.0845 | 0.0770 | -0.0133 | -0.0052 |   |
| 0.0004 | 1   | .   |                             |        |        |        |         |         |   |
| 2898   | CA  | CA  | . ILE ILE ILE A A 380 380 . | 0.0920 | 0.0870 | 0.0839 | -0.0086 | 0.0054  | - |
| 0.0118 | 1   | .   |                             |        |        |        |         |         |   |
| 2899   | CB  | CB  | . ILE ILE ILE A A 380 380 . | 0.0769 | 0.0741 | 0.0887 | -0.0031 | -0.0052 |   |
| 0.0019 | 1   | .   |                             |        |        |        |         |         |   |
| 2900   | CG1 | CG1 | . ILE ILE ILE A A 380 380 . | 0.0702 | 0.0964 | 0.0889 | -0.0078 | -0.0141 |   |
| 0.0166 | 1   | .   |                             |        |        |        |         |         |   |
| 2901   | CD  | CD  | . ILE ILE ILE A A 380 380 . | 0.0734 | 0.1268 | 0.1397 | -0.0274 | 0.0112  |   |
| 0.0242 | 1   | .   |                             |        |        |        |         |         |   |
| 2902   | CG2 | CG2 | . ILE ILE ILE A A 380 380 . | 0.1138 | 0.0772 | 0.0967 | 0.0451  | 0.0345  |   |
| 0.0132 | 1   | .   |                             |        |        |        |         |         |   |



|        |     |     |                             |        |        |        |         |         |   |
|--------|-----|-----|-----------------------------|--------|--------|--------|---------|---------|---|
| 2903   | C   | C   | . ILE ILE ILE A A 380 380 . | 0.0718 | 0.0873 | 0.0780 | 0.0003  | 0.0134  |   |
| 0.0035 | 1   | .   |                             |        |        |        |         |         |   |
| 2904   | O   | O   | . ILE ILE ILE A A 380 380 . | 0.0861 | 0.0917 | 0.0830 | 0.0028  | 0.0109  |   |
| 0.0039 | 1   | .   |                             |        |        |        |         |         |   |
| 2905   | N   | N   | . ALA ALA ALA A A 381 381 . | 0.0778 | 0.0685 | 0.0665 | 0.0160  | 0.0099  | - |
| 0.0024 | 1   | .   |                             |        |        |        |         |         |   |
| 2906   | CA  | CA  | . ALA ALA ALA A A 381 381 . | 0.0799 | 0.0495 | 0.0647 | -0.0013 | 0.0180  |   |
| 0.0043 | 1   | .   |                             |        |        |        |         |         |   |
| 2907   | CB  | CB  | . ALA ALA ALA A A 381 381 . | 0.0795 | 0.0651 | 0.0988 | 0.0291  | -0.0199 |   |
| 0.0073 | 1   | .   |                             |        |        |        |         |         |   |
| 2908   | C   | C   | . ALA ALA ALA A A 381 381 . | 0.0838 | 0.0659 | 0.0943 | 0.0012  | 0.0055  | - |
| 0.0091 | 1   | .   |                             |        |        |        |         |         |   |
| 2909   | O   | O   | . ALA ALA ALA A A 381 381 . | 0.0926 | 0.1082 | 0.0771 | -0.0054 | 0.0047  | - |
| 0.0080 | 1   | .   |                             |        |        |        |         |         |   |
| 2910   | N   | N   | . ASP ASP ASP A A 382 382 . | 0.0807 | 0.0719 | 0.0794 | -0.0164 | -0.0047 | - |
| 0.0084 | 1   | .   |                             |        |        |        |         |         |   |
| 2911   | CA  | CA  | . ASP ASP ASP A A 382 382 . | 0.0955 | 0.0965 | 0.1100 | -0.0218 | 0.0000  |   |
| 0.0044 | 1   | .   |                             |        |        |        |         |         |   |
| 2912   | CB  | CB  | . ASP ASP ASP A A 382 382 . | 0.0867 | 0.1211 | 0.1119 | 0.0019  | -0.0142 |   |
| 0.0005 | 1   | .   |                             |        |        |        |         |         |   |
| 2913   | CG  | CG  | . ASP ASP ASP A A 382 382 . | 0.1421 | 0.1514 | 0.1260 | 0.0093  | 0.0012  |   |
| 0.0375 | 1   | .   |                             |        |        |        |         |         |   |
| 2914   | OD1 | OD1 | . ASP ASP ASP A A 382 382 . | 0.1174 | 0.1568 | 0.1556 | -0.0133 | -0.0060 |   |
| 0.0387 | 1   | .   |                             |        |        |        |         |         |   |
| 2915   | OD2 | OD2 | . ASP ASP ASP A A 382 382 . | 0.1448 | 0.1668 | 0.1578 | -0.0008 | 0.0434  |   |
| 0.0245 | 1   | .   |                             |        |        |        |         |         |   |
| 2916   | C   | C   | . ASP ASP ASP A A 382 382 . | 0.0812 | 0.1220 | 0.1088 | -0.0048 | 0.0115  |   |
| 0.0082 | 1   | .   |                             |        |        |        |         |         |   |
| 2917   | O   | O   | . ASP ASP ASP A A 382 382 . | 0.0969 | 0.1324 | 0.1151 | 0.0035  | 0.0091  |   |
| 0.0015 | 1   | .   |                             |        |        |        |         |         |   |
| 2918   | N   | N   | . LEU LEU LEU A A 383 383 . | 0.0817 | 0.0819 | 0.0993 | -0.0022 | 0.0066  |   |
| 0.0103 | 1   | .   |                             |        |        |        |         |         |   |
| 2919   | CA  | CA  | . LEU LEU LEU A A 383 383 . | 0.1037 | 0.0741 | 0.0798 | 0.0127  | 0.0066  | - |
| 0.0180 | 1   | .   |                             |        |        |        |         |         |   |
| 2920   | CB  | CB  | . LEU LEU LEU A A 383 383 . | 0.0811 | 0.0865 | 0.0912 | 0.0154  | 0.0222  | - |
| 0.0027 | 1   | .   |                             |        |        |        |         |         |   |
| 2921   | CG  | CG  | . LEU LEU LEU A A 383 383 . | 0.1115 | 0.0814 | 0.0971 | 0.0078  | 0.0308  |   |
| 0.0233 | 1   | .   |                             |        |        |        |         |         |   |
| 2922   | CD1 | CD1 | . LEU LEU LEU A A 383 383 . | 0.0957 | 0.0915 | 0.1136 | -0.0104 | 0.0305  | - |
| 0.0154 | 1   | .   |                             |        |        |        |         |         |   |
| 2923   | CD2 | CD2 | . LEU LEU LEU A A 383 383 . | 0.1043 | 0.1037 | 0.1119 | -0.0055 | 0.0179  | - |
| 0.0236 | 1   | .   |                             |        |        |        |         |         |   |
| 2924   | C   | C   | . LEU LEU LEU A A 383 383 . | 0.1009 | 0.0762 | 0.0675 | -0.0224 | 0.0046  | - |
| 0.0039 | 1   | .   |                             |        |        |        |         |         |   |
| 2925   | O   | O   | . LEU LEU LEU A A 383 383 . | 0.1270 | 0.1099 | 0.0856 | -0.0035 | -0.0021 |   |
| 0.0031 | 1   | .   |                             |        |        |        |         |         |   |
| 2926   | N   | N   | . VAL VAL VAL A A 384 384 . | 0.0849 | 0.0870 | 0.0906 | -0.0108 | 0.0055  |   |
| 0.0008 | 1   | .   |                             |        |        |        |         |         |   |
| 2927   | CA  | CA  | . VAL VAL VAL A A 384 384 . | 0.0941 | 0.0898 | 0.0832 | -0.0172 | 0.0151  | - |
| 0.0063 | 1   | .   |                             |        |        |        |         |         |   |
| 2928   | CB  | CB  | . VAL VAL VAL A A 384 384 . | 0.0948 | 0.0827 | 0.0871 | -0.0122 | -0.0193 |   |
| 0.0174 | 1   | .   |                             |        |        |        |         |         |   |
| 2929   | CG1 | CG1 | . VAL VAL VAL A A 384 384 . | 0.1042 | 0.1084 | 0.0731 | 0.0067  | -0.0021 |   |
| 0.0010 | 1   | .   |                             |        |        |        |         |         |   |
| 2930   | CG2 | CG2 | . VAL VAL VAL A A 384 384 . | 0.1138 | 0.1164 | 0.0814 | -0.0082 | 0.0036  |   |
| 0.0030 | 1   | .   |                             |        |        |        |         |         |   |
| 2931   | C   | C   | . VAL VAL VAL A A 384 384 . | 0.0853 | 0.0997 | 0.0850 | -0.0024 | -0.0070 |   |
| 0.0064 | 1   | .   |                             |        |        |        |         |         |   |
| 2932   | O   | O   | . VAL VAL VAL A A 384 384 . | 0.0948 | 0.0984 | 0.0915 | -0.0033 | 0.0072  | - |
| 0.0045 | 1   | .   |                             |        |        |        |         |         |   |

|        |     |     |                             |        |        |        |         |         |   |
|--------|-----|-----|-----------------------------|--------|--------|--------|---------|---------|---|
| 2933   | N   | N   | . VAL VAL VAL A A 385 385 . | 0.0749 | 0.0997 | 0.0929 | 0.0037  | 0.0033  | - |
| 0.0111 | 1   | .   |                             |        |        |        |         |         |   |
| 2934   | CA  | CA  | . VAL VAL VAL A A 385 385 . | 0.0972 | 0.1090 | 0.0973 | 0.0118  | 0.0219  |   |
| 0.0161 | 1   | .   |                             |        |        |        |         |         |   |
| 2935   | CB  | CB  | . VAL VAL VAL A A 385 385 . | 0.0762 | 0.1095 | 0.0798 | 0.0113  | 0.0111  |   |
| 0.0069 | 1   | .   |                             |        |        |        |         |         |   |
| 2936   | CG1 | CG1 | . VAL VAL VAL A A 385 385 . | 0.1048 | 0.1365 | 0.1340 | 0.0143  | 0.0374  |   |
| 0.0071 | 1   | .   |                             |        |        |        |         |         |   |
| 2937   | CG2 | CG2 | . VAL VAL VAL A A 385 385 . | 0.1134 | 0.1183 | 0.1334 | 0.0038  | 0.0311  |   |
| 0.0254 | 1   | .   |                             |        |        |        |         |         |   |
| 2938   | C   | C   | . VAL VAL VAL A A 385 385 . | 0.0861 | 0.1161 | 0.0997 | -0.0032 | 0.0156  | - |
| 0.0009 | 1   | .   |                             |        |        |        |         |         |   |
| 2939   | O   | O   | . VAL VAL VAL A A 385 385 . | 0.1061 | 0.1441 | 0.1117 | -0.0003 | 0.0213  |   |
| 0.0043 | 1   | .   |                             |        |        |        |         |         |   |
| 2940   | N   | N   | . GLY GLY GLY A A 386 386 . | 0.1044 | 0.1088 | 0.1202 | -0.0132 | 0.0294  |   |
| 0.0128 | 1   | .   |                             |        |        |        |         |         |   |
| 2941   | CA  | CA  | . GLY GLY GLY A A 386 386 . | 0.1001 | 0.1117 | 0.1218 | -0.0013 | 0.0215  |   |
| 0.0253 | 1   | .   |                             |        |        |        |         |         |   |
| 2942   | C   | C   | . GLY GLY GLY A A 386 386 . | 0.1108 | 0.1168 | 0.0990 | -0.0157 | 0.0155  |   |
| 0.0119 | 1   | .   |                             |        |        |        |         |         |   |
| 2943   | O   | O   | . GLY GLY GLY A A 386 386 . | 0.1424 | 0.1533 | 0.1208 | -0.0291 | 0.0171  |   |
| 0.0343 | 1   | .   |                             |        |        |        |         |         |   |
| 2944   | N   | N   | . LEU LEU LEU A A 387 387 . | 0.1029 | 0.1180 | 0.1185 | 0.0055  | -0.0027 |   |
| 0.0107 | 1   | .   |                             |        |        |        |         |         |   |
| 2945   | CA  | CA  | . LEU LEU LEU A A 387 387 . | 0.1079 | 0.1197 | 0.0889 | 0.0175  | 0.0100  | - |
| 0.0011 | 1   | .   |                             |        |        |        |         |         |   |
| 2946   | CB  | CB  | . LEU LEU LEU A A 387 387 . | 0.1298 | 0.1393 | 0.1038 | 0.0188  | 0.0189  |   |
| 0.0104 | 1   | .   |                             |        |        |        |         |         |   |
| 2947   | CG  | CG  | . LEU LEU LEU A A 387 387 . | 0.1374 | 0.1313 | 0.1408 | -0.0180 | 0.0172  | - |
| 0.0192 | 1   | .   |                             |        |        |        |         |         |   |
| 2948   | CD1 | CD1 | . LEU LEU LEU A A 387 387 . | 0.1280 | 0.2057 | 0.1710 | 0.0384  | -0.0022 | - |
| 0.0374 | 1   | .   |                             |        |        |        |         |         |   |
| 2949   | CD2 | CD2 | . LEU LEU LEU A A 387 387 . | 0.2734 | 0.1852 | 0.1784 | -0.0261 | 0.0117  |   |
| 0.0009 | 1   | .   |                             |        |        |        |         |         |   |
| 2950   | C   | C   | . LEU LEU LEU A A 387 387 . | 0.1357 | 0.1290 | 0.0965 | 0.0021  | 0.0099  |   |
| 0.0060 | 1   | .   |                             |        |        |        |         |         |   |
| 2951   | O   | O   | . LEU LEU LEU A A 387 387 . | 0.1397 | 0.1585 | 0.1318 | -0.0023 | 0.0150  |   |
| 0.0240 | 1   | .   |                             |        |        |        |         |         |   |
| 2952   | N   | N   | . CYS CYS CYS A A 388 388 . | 0.1254 | 0.1393 | 0.1229 | -0.0129 | 0.0335  | - |
| 0.0100 | 1   | .   |                             |        |        |        |         |         |   |
| 2953   | CA  | CA  | . CYS CYS CYS A A 388 388 . | 0.1535 | 0.1387 | 0.1376 | -0.0018 | 0.0135  |   |
| 0.0010 | 1   | .   |                             |        |        |        |         |         |   |
| 2954   | CB  | CB  | . CYS CYS CYS A A 388 388 . | 0.1428 | 0.1932 | 0.1582 | 0.0160  | 0.0197  | - |
| 0.0141 | 1   | .   |                             |        |        |        |         |         |   |
| 2955   | SG  | SG  | . CYS CYS CYS A A 388 388 . | 0.2491 | 0.3390 | 0.2641 | -0.0002 | 0.0430  |   |
| 0.0011 | 1   | .   |                             |        |        |        |         |         |   |
| 2956   | C   | C   | . CYS CYS CYS A A 388 388 . | 0.1437 | 0.1618 | 0.1297 | 0.0012  | 0.0013  |   |
| 0.0024 | 1   | .   |                             |        |        |        |         |         |   |
| 2957   | O   | O   | . CYS CYS CYS A A 388 388 . | 0.1578 | 0.2168 | 0.1567 | -0.0158 | 0.0064  | - |
| 0.0276 | 1   | .   |                             |        |        |        |         |         |   |
| 2958   | N   | N   | . THR THR THR A A 389 389 . | 0.1111 | 0.1013 | 0.1290 | -0.0039 | 0.0019  |   |
| 0.0029 | 1   | .   |                             |        |        |        |         |         |   |
| 2959   | CA  | CA  | . THR THR THR A A 389 389 . | 0.1160 | 0.1345 | 0.1142 | 0.0009  | 0.0053  |   |
| 0.0045 | 1   | .   |                             |        |        |        |         |         |   |
| 2960   | CB  | CB  | . THR THR THR A A 389 389 . | 0.1347 | 0.1182 | 0.1284 | -0.0043 | 0.0226  |   |
| 0.0190 | 1   | .   |                             |        |        |        |         |         |   |
| 2961   | OG1 | OG1 | . THR THR THR A A 389 389 . | 0.1354 | 0.1370 | 0.1097 | 0.0166  | 0.0006  |   |
| 0.0290 | 1   | .   |                             |        |        |        |         |         |   |
| 2962   | CG2 | CG2 | . THR THR THR A A 389 389 . | 0.1544 | 0.0966 | 0.1451 | -0.0158 | 0.0161  | - |
| 0.0050 | 1   | .   |                             |        |        |        |         |         |   |

|        |     |     |                             |        |        |        |         |         |   |
|--------|-----|-----|-----------------------------|--------|--------|--------|---------|---------|---|
| 2963   | C   | C   | . THR THR THR A A 389 389 . | 0.1161 | 0.1365 | 0.1125 | 0.0047  | 0.0108  |   |
| 0.0088 | 1   | .   |                             |        |        |        |         |         |   |
| 2964   | O   | O   | . THR THR THR A A 389 389 . | 0.1299 | 0.1781 | 0.1312 | -0.0014 | -0.0019 | - |
| 0.0124 | 1   | .   |                             |        |        |        |         |         |   |
| 2965   | N   | N   | . GLY GLY GLY A A 390 390 . | 0.1060 | 0.0977 | 0.0907 | 0.0032  | 0.0260  |   |
| 0.0010 | 1   | .   |                             |        |        |        |         |         |   |
| 2966   | CA  | CA  | . GLY GLY GLY A A 390 390 . | 0.1214 | 0.1085 | 0.1035 | -0.0220 | 0.0166  |   |
| 0.0036 | 1   | .   |                             |        |        |        |         |         |   |
| 2967   | C   | C   | . GLY GLY GLY A A 390 390 . | 0.0971 | 0.0768 | 0.0902 | 0.0180  | 0.0001  |   |
| 0.0009 | 1   | .   |                             |        |        |        |         |         |   |
| 2968   | O   | O   | . GLY GLY GLY A A 390 390 . | 0.1228 | 0.1015 | 0.0885 | -0.0109 | -0.0072 |   |
| 0.0092 | 1   | .   |                             |        |        |        |         |         |   |
| 2969   | N   | N   | . GLN GLN GLN A A 391 391 . | 0.0868 | 0.1114 | 0.0688 | 0.0174  | -0.0032 |   |
| 0.0033 | 1   | .   |                             |        |        |        |         |         |   |
| 2970   | CA  | CA  | . GLN GLN GLN A A 391 391 . | 0.0934 | 0.0985 | 0.0650 | 0.0098  | 0.0012  | - |
| 0.0049 | 1   | .   |                             |        |        |        |         |         |   |
| 2971   | CB  | CB  | . GLN GLN GLN A A 391 391 . | 0.1217 | 0.1148 | 0.1001 | 0.0116  | 0.0030  |   |
| 0.0303 | 1   | .   |                             |        |        |        |         |         |   |
| 2972   | CG  | CG  | . GLN GLN GLN A A 391 391 . | 0.0952 | 0.1251 | 0.1344 | 0.0294  | -0.0036 |   |
| 0.0329 | 1   | .   |                             |        |        |        |         |         |   |
| 2973   | CD  | CD  | . GLN GLN GLN A A 391 391 . | 0.1008 | 0.1491 | 0.1159 | 0.0096  | -0.0027 |   |
| 0.0258 | 1   | .   |                             |        |        |        |         |         |   |
| 2974   | OE1 | OE1 | . GLN GLN GLN A A 391 391 . | 0.1236 | 0.1663 | 0.1120 | 0.0255  | -0.0230 |   |
| 0.0082 | 1   | .   |                             |        |        |        |         |         |   |
| 2975   | NE2 | NE2 | . GLN GLN GLN A A 391 391 . | 0.1279 | 0.1516 | 0.0841 | 0.0053  | -0.0013 |   |
| 0.0243 | 1   | .   |                             |        |        |        |         |         |   |
| 2976   | C   | C   | . GLN GLN GLN A A 391 391 . | 0.1026 | 0.0704 | 0.0839 | 0.0060  | 0.0028  | - |
| 0.0109 | 1   | .   |                             |        |        |        |         |         |   |
| 2977   | O   | O   | . GLN GLN GLN A A 391 391 . | 0.0979 | 0.0849 | 0.0857 | -0.0051 | 0.0076  |   |
| 0.0017 | 1   | .   |                             |        |        |        |         |         |   |
| 2978   | N   | N   | . ILE ILE ILE A A 392 392 . | 0.0809 | 0.0869 | 0.0685 | -0.0011 | -0.0007 |   |
| 0.0003 | 1   | .   |                             |        |        |        |         |         |   |
| 2979   | CA  | CA  | . ILE ILE ILE A A 392 392 . | 0.0741 | 0.0776 | 0.0630 | -0.0084 | -0.0109 | - |
| 0.0008 | 1   | .   |                             |        |        |        |         |         |   |
| 2980   | CB  | CB  | . ILE ILE ILE A A 392 392 . | 0.0804 | 0.0754 | 0.0857 | -0.0039 | 0.0172  | - |
| 0.0083 | 1   | .   |                             |        |        |        |         |         |   |
| 2981   | CG1 | CG1 | . ILE ILE ILE A A 392 392 . | 0.0927 | 0.0846 | 0.0755 | 0.0027  | -0.0049 | - |
| 0.0173 | 1   | .   |                             |        |        |        |         |         |   |
| 2982   | CD  | CD  | . ILE ILE ILE A A 392 392 . | 0.0863 | 0.1476 | 0.1014 | -0.0170 | -0.0091 |   |
| 0.0147 | 1   | .   |                             |        |        |        |         |         |   |
| 2983   | CG2 | CG2 | . ILE ILE ILE A A 392 392 . | 0.0983 | 0.0807 | 0.1132 | 0.0018  | 0.0166  |   |
| 0.0210 | 1   | .   |                             |        |        |        |         |         |   |
| 2984   | C   | C   | . ILE ILE ILE A A 392 392 . | 0.0810 | 0.0797 | 0.0779 | 0.0162  | 0.0016  |   |
| 0.0085 | 1   | .   |                             |        |        |        |         |         |   |
| 2985   | O   | O   | . ILE ILE ILE A A 392 392 . | 0.1014 | 0.0864 | 0.1140 | -0.0017 | -0.0022 | - |
| 0.0111 | 1   | .   |                             |        |        |        |         |         |   |
| 2986   | N   | N   | . LYS LYS LYS A A 393 393 . | 0.0737 | 0.0897 | 0.0670 | 0.0067  | -0.0015 | - |
| 0.0008 | 1   | .   |                             |        |        |        |         |         |   |
| 2987   | CA  | CA  | . LYS LYS LYS A A 393 393 . | 0.0651 | 0.0809 | 0.0741 | -0.0089 | -0.0013 | - |
| 0.0033 | 1   | .   |                             |        |        |        |         |         |   |
| 2988   | CB  | CB  | . LYS LYS LYS A A 393 393 . | 0.0669 | 0.0794 | 0.0999 | 0.0042  | -0.0066 | - |
| 0.0059 | 1   | .   |                             |        |        |        |         |         |   |
| 2989   | CG  | CG  | . LYS LYS LYS A A 393 393 . | 0.0586 | 0.1039 | 0.1142 | 0.0096  | -0.0108 | - |
| 0.0045 | 1   | .   |                             |        |        |        |         |         |   |
| 2990   | CD  | CD  | . LYS LYS LYS A A 393 393 . | 0.0741 | 0.0973 | 0.1165 | -0.0058 | -0.0044 | - |
| 0.0158 | 1   | .   |                             |        |        |        |         |         |   |
| 2991   | CE  | CE  | . LYS LYS LYS A A 393 393 . | 0.0534 | 0.1302 | 0.1635 | 0.0137  | -0.0021 | - |
| 0.0101 | 1   | .   |                             |        |        |        |         |         |   |
| 2992   | NZ  | NZ  | . LYS LYS LYS A A 393 393 . | 0.0838 | 0.1285 | 0.1165 | -0.0109 | 0.0034  |   |
| 0.0130 | 1   | .   |                             |        |        |        |         |         |   |

|        |     |     |                             |        |        |        |         |         |   |
|--------|-----|-----|-----------------------------|--------|--------|--------|---------|---------|---|
| 2993   | C   | C   | . LYS LYS LYS A A 393 393 . | 0.0749 | 0.0719 | 0.0629 | -0.0079 | 0.0067  |   |
| 0.0016 | 1   | .   |                             |        |        |        |         |         |   |
| 2994   | O   | O   | . LYS LYS LYS A A 393 393 . | 0.0885 | 0.0750 | 0.0703 | 0.0096  | -0.0020 | - |
| 0.0072 | 1   | .   |                             |        |        |        |         |         |   |
| 2995   | N   | N   | . THR THR THR A A 394 394 . | 0.0746 | 0.0808 | 0.0632 | -0.0056 | -0.0143 |   |
| 0.0039 | 1   | .   |                             |        |        |        |         |         |   |
| 2996   | CA  | CA  | . THR THR THR A A 394 394 . | 0.0745 | 0.0943 | 0.0650 | -0.0086 | 0.0087  |   |
| 0.0030 | 1   | .   |                             |        |        |        |         |         |   |
| 2997   | CB  | CB  | . THR THR THR A A 394 394 . | 0.0615 | 0.1155 | 0.0615 | 0.0070  | 0.0124  | - |
| 0.0104 | 1   | .   |                             |        |        |        |         |         |   |
| 2998   | OG1 | OG1 | . THR THR THR A A 394 394 . | 0.0909 | 0.0899 | 0.0854 | -0.0099 | -0.0055 | - |
| 0.0036 | 1   | .   |                             |        |        |        |         |         |   |
| 2999   | CG2 | CG2 | . THR THR THR A A 394 394 . | 0.0835 | 0.1037 | 0.1394 | 0.0106  | -0.0075 | - |
| 0.0031 | 1   | .   |                             |        |        |        |         |         |   |
| 3000   | C   | C   | . THR THR THR A A 394 394 . | 0.0730 | 0.0616 | 0.0701 | -0.0045 | -0.0026 |   |
| 0.0023 | 1   | .   |                             |        |        |        |         |         |   |
| 3001   | O   | O   | . THR THR THR A A 394 394 . | 0.0875 | 0.0962 | 0.0835 | -0.0210 | -0.0102 |   |
| 0.0101 | 1   | .   |                             |        |        |        |         |         |   |
| 3002   | N   | N   | . GLY GLY GLY A A 395 395 . | 0.0666 | 0.0739 | 0.0712 | 0.0009  | 0.0136  |   |
| 0.0051 | 1   | .   |                             |        |        |        |         |         |   |
| 3003   | CA  | CA  | . GLY GLY GLY A A 395 395 . | 0.1000 | 0.0796 | 0.0638 | -0.0090 | 0.0003  |   |
| 0.0062 | 1   | .   |                             |        |        |        |         |         |   |
| 3004   | C   | C   | . GLY GLY GLY A A 395 395 . | 0.0747 | 0.0808 | 0.0751 | 0.0135  | -0.0048 |   |
| 0.0026 | 1   | .   |                             |        |        |        |         |         |   |
| 3005   | O   | O   | . GLY GLY GLY A A 395 395 . | 0.0925 | 0.0768 | 0.0764 | 0.0111  | 0.0026  | - |
| 0.0051 | 1   | .   |                             |        |        |        |         |         |   |
| 3006   | N   | N   | . ALA ALA ALA A A 396 396 . | 0.0832 | 0.0643 | 0.0744 | -0.0027 | -0.0028 |   |
| 0.0061 | 1   | .   |                             |        |        |        |         |         |   |
| 3007   | CA  | CA  | . ALA ALA ALA A A 396 396 . | 0.0690 | 0.0706 | 0.0929 | 0.0056  | -0.0072 |   |
| 0.0213 | 1   | .   |                             |        |        |        |         |         |   |
| 3008   | CB  | CB  | . ALA ALA ALA A A 396 396 . | 0.0750 | 0.1085 | 0.0990 | -0.0153 | 0.0008  |   |
| 0.0150 | 1   | .   |                             |        |        |        |         |         |   |
| 3009   | C   | C   | . ALA ALA ALA A A 396 396 . | 0.0820 | 0.0670 | 0.0828 | 0.0056  | -0.0171 |   |
| 0.0032 | 1   | .   |                             |        |        |        |         |         |   |
| 3010   | O   | O   | . ALA ALA ALA A A 396 396 . | 0.0979 | 0.0844 | 0.0836 | -0.0096 | 0.0008  |   |
| 0.0125 | 1   | .   |                             |        |        |        |         |         |   |
| 3011   | N   | N   | . PRO PRO PRO A A 397 397 . | 0.0825 | 0.0712 | 0.0702 | 0.0097  | -0.0116 | - |
| 0.0038 | 1   | .   |                             |        |        |        |         |         |   |
| 3012   | CA  | CA  | . PRO PRO PRO A A 397 397 . | 0.0903 | 0.0947 | 0.0817 | 0.0098  | -0.0073 | - |
| 0.0056 | 1   | .   |                             |        |        |        |         |         |   |
| 3013   | CB  | CB  | . PRO PRO PRO A A 397 397 . | 0.0732 | 0.0785 | 0.0803 | -0.0053 | 0.0161  | - |
| 0.0049 | 1   | .   |                             |        |        |        |         |         |   |
| 3014   | CG  | CG  | . PRO PRO PRO A A 397 397 . | 0.0837 | 0.1019 | 0.1138 | -0.0034 | 0.0035  |   |
| 0.0195 | 1   | .   |                             |        |        |        |         |         |   |
| 3015   | CD  | CD  | . PRO PRO PRO A A 397 397 . | 0.0796 | 0.0735 | 0.1007 | -0.0167 | -0.0117 | - |
| 0.0098 | 1   | .   |                             |        |        |        |         |         |   |
| 3016   | C   | C   | . PRO PRO PRO A A 397 397 . | 0.0845 | 0.0909 | 0.0882 | 0.0008  | -0.0019 |   |
| 0.0076 | 1   | .   |                             |        |        |        |         |         |   |
| 3017   | O   | O   | . PRO PRO PRO A A 397 397 . | 0.1115 | 0.0925 | 0.0991 | 0.0074  | -0.0094 |   |
| 0.0084 | 1   | .   |                             |        |        |        |         |         |   |
| 3018   | N   | N   | . CYS CYS CYS A A 398 398 . | 0.0794 | 0.0788 | 0.0647 | -0.0005 | 0.0013  |   |
| 0.0040 | 1   | .   |                             |        |        |        |         |         |   |
| 3019   | CA  | CA  | . CYS CYS CYS A A 398 398 . | 0.1014 | 0.0950 | 0.0839 | 0.0004  | 0.0310  | - |
| 0.0121 | 1   | .   |                             |        |        |        |         |         |   |
| 3020   | CB  | CB  | . CYS CYS CYS A A 398 398 . | 0.1114 | 0.0958 | 0.0889 | -0.0209 | 0.0119  | - |
| 0.0212 | 1   | .   |                             |        |        |        |         |         |   |
| 3021   | SG  | SG  | . CYS CYS CYS A A 398 398 . | 0.1153 | 0.1114 | 0.0939 | -0.0115 | -0.0006 |   |
| 0.0066 | 1   | .   |                             |        |        |        |         |         |   |
| 3022   | C   | C   | . CYS CYS CYS A A 398 398 . | 0.0776 | 0.0698 | 0.0816 | 0.0090  | -0.0037 |   |
| 0.0009 | 1   | .   |                             |        |        |        |         |         |   |

|        |     |     |                             |        |        |        |         |         |   |
|--------|-----|-----|-----------------------------|--------|--------|--------|---------|---------|---|
| 3023   | O   | O   | . CYS CYS CYS A A 398 398 . | 0.0940 | 0.0859 | 0.1015 | 0.0047  | -0.0045 |   |
| 0.0030 | 1   | .   |                             |        |        |        |         |         |   |
| 3024   | N   | N   | . ARG ARG ARG A A 399 399 . | 0.0745 | 0.0669 | 0.0676 | -0.0062 | 0.0006  | - |
| 0.0184 | 1   | .   |                             |        |        |        |         |         |   |
| 3025   | CA  | CA  | . ARG ARG ARG A A 399 399 . | 0.0619 | 0.0761 | 0.0845 | 0.0052  | 0.0038  | - |
| 0.0060 | 1   | .   |                             |        |        |        |         |         |   |
| 3026   | CB  | CB  | . ARG ARG ARG A A 399 399 . | 0.0776 | 0.0778 | 0.0967 | 0.0145  | 0.0156  | - |
| 0.0147 | 1   | .   |                             |        |        |        |         |         |   |
| 3027   | CG  | CG  | . ARG ARG ARG A A 399 399 . | 0.0521 | 0.0773 | 0.0813 | 0.0007  | -0.0072 |   |
| 0.0182 | 1   | .   |                             |        |        |        |         |         |   |
| 3028   | CD  | CD  | . ARG ARG ARG A A 399 399 . | 0.0730 | 0.0681 | 0.1173 | 0.0154  | -0.0211 | - |
| 0.0210 | 1   | .   |                             |        |        |        |         |         |   |
| 3029   | NE  | NE  | . ARG ARG ARG A A 399 399 . | 0.0800 | 0.0686 | 0.0845 | 0.0145  | 0.0026  | - |
| 0.0046 | 1   | .   |                             |        |        |        |         |         |   |
| 3030   | CZ  | CZ  | . ARG ARG ARG A A 399 399 . | 0.0750 | 0.0839 | 0.0933 | 0.0048  | 0.0118  |   |
| 0.0003 | 1   | .   |                             |        |        |        |         |         |   |
| 3031   | NH1 | NH1 | . ARG ARG ARG A A 399 399 . | 0.0958 | 0.0806 | 0.0880 | -0.0063 | -0.0062 |   |
| 0.0093 | 1   | .   |                             |        |        |        |         |         |   |
| 3032   | NH2 | NH2 | . ARG ARG ARG A A 399 399 . | 0.0943 | 0.0938 | 0.0891 | -0.0103 | -0.0031 |   |
| 0.0057 | 1   | .   |                             |        |        |        |         |         |   |
| 3033   | C   | C   | . ARG ARG ARG A A 399 399 . | 0.0692 | 0.0810 | 0.0807 | -0.0114 | -0.0016 |   |
| 0.0087 | 1   | .   |                             |        |        |        |         |         |   |
| 3034   | O   | O   | . ARG ARG ARG A A 399 399 . | 0.0847 | 0.0663 | 0.0722 | -0.0033 | 0.0015  | - |
| 0.0007 | 1   | .   |                             |        |        |        |         |         |   |
| 3035   | N   | N   | . SER SER SER A A 400 400 . | 0.0806 | 0.0680 | 0.0746 | 0.0018  | 0.0000  |   |
| 0.0026 | 1   | .   |                             |        |        |        |         |         |   |
| 3036   | CA  | CA  | . SER SER SER A A 400 400 . | 0.0654 | 0.0725 | 0.0535 | -0.0018 | 0.0077  |   |
| 0.0052 | 1   | .   |                             |        |        |        |         |         |   |
| 3037   | CB  | CB  | . SER SER SER A A 400 400 . | 0.0818 | 0.0633 | 0.0766 | 0.0121  | -0.0109 |   |
| 0.0182 | 1   | .   |                             |        |        |        |         |         |   |
| 3038   | OG  | OG  | . SER SER SER A A 400 400 . | 0.1051 | 0.0744 | 0.0852 | 0.0087  | 0.0063  |   |
| 0.0068 | 1   | .   |                             |        |        |        |         |         |   |
| 3039   | C   | C   | . SER SER SER A A 400 400 . | 0.0682 | 0.0718 | 0.0676 | 0.0198  | 0.0056  | - |
| 0.0011 | 1   | .   |                             |        |        |        |         |         |   |
| 3040   | O   | O   | . SER SER SER A A 400 400 . | 0.0882 | 0.0732 | 0.0822 | -0.0039 | 0.0017  | - |
| 0.0038 | 1   | .   |                             |        |        |        |         |         |   |
| 3041   | N   | N   | . GLU GLU GLU A A 401 401 . | 0.0585 | 0.0582 | 0.0837 | 0.0112  | 0.0073  |   |
| 0.0060 | 1   | .   |                             |        |        |        |         |         |   |
| 3042   | CA  | CA  | . GLU GLU GLU A A 401 401 . | 0.0723 | 0.0693 | 0.0703 | 0.0211  | 0.0134  |   |
| 0.0000 | 1   | .   |                             |        |        |        |         |         |   |
| 3043   | CB  | CB  | . GLU GLU GLU A A 401 401 . | 0.0535 | 0.0830 | 0.0920 | 0.0229  | 0.0064  |   |
| 0.0002 | 1   | .   |                             |        |        |        |         |         |   |
| 3044   | CG  | CG  | . GLU GLU GLU A A 401 401 . | 0.0792 | 0.0749 | 0.0819 | -0.0208 | 0.0183  |   |
| 0.0148 | 1   | .   |                             |        |        |        |         |         |   |
| 3045   | CD  | CD  | . GLU GLU GLU A A 401 401 . | 0.0771 | 0.0750 | 0.0725 | 0.0204  | 0.0006  | - |
| 0.0101 | 1   | .   |                             |        |        |        |         |         |   |
| 3046   | OE1 | OE1 | . GLU GLU GLU A A 401 401 . | 0.0822 | 0.0778 | 0.0604 | -0.0069 | -0.0010 | - |
| 0.0016 | 1   | .   |                             |        |        |        |         |         |   |
| 3047   | OE2 | OE2 | . GLU GLU GLU A A 401 401 . | 0.0821 | 0.1010 | 0.0831 | -0.0014 | 0.0073  |   |
| 0.0126 | 1   | .   |                             |        |        |        |         |         |   |
| 3048   | C   | C   | . GLU GLU GLU A A 401 401 . | 0.0559 | 0.0894 | 0.0749 | -0.0093 | -0.0046 |   |
| 0.0012 | 1   | .   |                             |        |        |        |         |         |   |
| 3049   | O   | O   | . GLU GLU GLU A A 401 401 . | 0.0807 | 0.0735 | 0.0821 | -0.0036 | -0.0016 | - |
| 0.0041 | 1   | .   |                             |        |        |        |         |         |   |
| 3050   | N   | N   | . ARG ARG ARG A A 402 402 . | 0.0793 | 0.0698 | 0.0734 | -0.0010 | -0.0055 | - |
| 0.0138 | 1   | .   |                             |        |        |        |         |         |   |
| 3051   | CA  | CA  | . ARG ARG ARG A A 402 402 . | 0.0605 | 0.0790 | 0.0756 | -0.0053 | -0.0039 | - |
| 0.0031 | 1   | .   |                             |        |        |        |         |         |   |
| 3052   | CB  | CB  | . ARG ARG ARG A A 402 402 . | 0.0695 | 0.0628 | 0.1003 | -0.0121 | 0.0044  | - |
| 0.0022 | 1   | .   |                             |        |        |        |         |         |   |



|        |     |     |                             |        |        |        |         |         |   |
|--------|-----|-----|-----------------------------|--------|--------|--------|---------|---------|---|
| 3083   | N   | N   | . TYR TYR TYR A A 406 406 . | 0.1045 | 0.0578 | 0.0821 | 0.0005  | 0.0039  |   |
| 0.0111 | 1   | .   |                             |        |        |        |         |         |   |
| 3084   | CA  | CA  | . TYR TYR TYR A A 406 406 . | 0.0820 | 0.0755 | 0.0658 | -0.0025 | 0.0126  | - |
| 0.0003 | 1   | .   |                             |        |        |        |         |         |   |
| 3085   | CB  | CB  | . TYR TYR TYR A A 406 406 . | 0.0871 | 0.0830 | 0.0923 | -0.0088 | -0.0058 |   |
| 0.0044 | 1   | .   |                             |        |        |        |         |         |   |
| 3086   | CG  | CG  | . TYR TYR TYR A A 406 406 . | 0.0831 | 0.0650 | 0.0761 | 0.0211  | -0.0056 |   |
| 0.0057 | 1   | .   |                             |        |        |        |         |         |   |
| 3087   | CD1 | CD1 | . TYR TYR TYR A A 406 406 . | 0.0892 | 0.0603 | 0.0857 | 0.0015  | -0.0153 | - |
| 0.0093 | 1   | .   |                             |        |        |        |         |         |   |
| 3088   | CE1 | CE1 | . TYR TYR TYR A A 406 406 . | 0.0639 | 0.0792 | 0.0842 | 0.0132  | 0.0069  | - |
| 0.0089 | 1   | .   |                             |        |        |        |         |         |   |
| 3089   | CZ  | CZ  | . TYR TYR TYR A A 406 406 . | 0.0764 | 0.0849 | 0.0784 | 0.0072  | -0.0048 | - |
| 0.0041 | 1   | .   |                             |        |        |        |         |         |   |
| 3090   | OH  | OH  | . TYR TYR TYR A A 406 406 . | 0.0854 | 0.0900 | 0.0776 | -0.0026 | -0.0095 | - |
| 0.0034 | 1   | .   |                             |        |        |        |         |         |   |
| 3091   | CE2 | CE2 | . TYR TYR TYR A A 406 406 . | 0.0902 | 0.0739 | 0.0944 | 0.0025  | -0.0042 |   |
| 0.0019 | 1   | .   |                             |        |        |        |         |         |   |
| 3092   | CD2 | CD2 | . TYR TYR TYR A A 406 406 . | 0.0658 | 0.0598 | 0.0797 | 0.0070  | -0.0120 |   |
| 0.0097 | 1   | .   |                             |        |        |        |         |         |   |
| 3093   | C   | C   | . TYR TYR TYR A A 406 406 . | 0.0747 | 0.0783 | 0.0701 | -0.0158 | 0.0036  | - |
| 0.0023 | 1   | .   |                             |        |        |        |         |         |   |
| 3094   | O   | O   | . TYR TYR TYR A A 406 406 . | 0.0857 | 0.0958 | 0.1025 | -0.0056 | 0.0062  |   |
| 0.0002 | 1   | .   |                             |        |        |        |         |         |   |
| 3095   | N   | N   | . ASN ASN ASN A A 407 407 . | 0.0893 | 0.0706 | 0.0641 | 0.0059  | -0.0142 | - |
| 0.0042 | 1   | .   |                             |        |        |        |         |         |   |
| 3096   | CA  | CA  | . ASN ASN ASN A A 407 407 . | 0.0832 | 0.1131 | 0.0732 | -0.0036 | 0.0038  |   |
| 0.0159 | 1   | .   |                             |        |        |        |         |         |   |
| 3097   | CB  | CB  | . ASN ASN ASN A A 407 407 . | 0.1076 | 0.0841 | 0.0757 | -0.0019 | 0.0013  |   |
| 0.0140 | 1   | .   |                             |        |        |        |         |         |   |
| 3098   | CG  | CG  | . ASN ASN ASN A A 407 407 . | 0.0626 | 0.0737 | 0.0799 | -0.0176 | 0.0035  | - |
| 0.0026 | 1   | .   |                             |        |        |        |         |         |   |
| 3099   | OD1 | OD1 | . ASN ASN ASN A A 407 407 . | 0.0905 | 0.0867 | 0.0802 | -0.0188 | -0.0015 |   |
| 0.0128 | 1   | .   |                             |        |        |        |         |         |   |
| 3100   | ND2 | ND2 | . ASN ASN ASN A A 407 407 . | 0.0756 | 0.1019 | 0.0781 | 0.0195  | 0.0101  | - |
| 0.0019 | 1   | .   |                             |        |        |        |         |         |   |
| 3101   | C   | C   | . ASN ASN ASN A A 407 407 . | 0.0920 | 0.0916 | 0.0778 | -0.0012 | 0.0103  |   |
| 0.0136 | 1   | .   |                             |        |        |        |         |         |   |
| 3102   | O   | O   | . ASN ASN ASN A A 407 407 . | 0.0854 | 0.1063 | 0.0825 | 0.0081  | 0.0192  |   |
| 0.0019 | 1   | .   |                             |        |        |        |         |         |   |
| 3103   | N   | N   | . GLN GLN GLN A A 408 408 . | 0.0821 | 0.0938 | 0.0834 | -0.0036 | 0.0105  | - |
| 0.0059 | 1   | .   |                             |        |        |        |         |         |   |
| 3104   | CA  | CA  | . GLN GLN GLN A A 408 408 . | 0.0702 | 0.0849 | 0.0703 | 0.0042  | 0.0200  |   |
| 0.0023 | 1   | .   |                             |        |        |        |         |         |   |
| 3105   | CB  | CB  | . GLN GLN GLN A A 408 408 . | 0.0935 | 0.0728 | 0.0802 | 0.0019  | 0.0242  |   |
| 0.0063 | 1   | .   |                             |        |        |        |         |         |   |
| 3106   | CG  | CG  | . GLN GLN GLN A A 408 408 . | 0.0726 | 0.0620 | 0.0821 | -0.0171 | -0.0024 |   |
| 0.0032 | 1   | .   |                             |        |        |        |         |         |   |
| 3107   | CD  | CD  | . GLN GLN GLN A A 408 408 . | 0.1306 | 0.1520 | 0.1685 | -0.0140 | -0.0107 |   |
| 0.0084 | 1   | .   |                             |        |        |        |         |         |   |
| 3108   | OE1 | OE1 | . GLN GLN GLN A A 408 408 . | 0.1344 | 0.1811 | 0.1811 | -0.0183 | -0.0119 |   |
| 0.0334 | 1   | .   |                             |        |        |        |         |         |   |
| 3109   | NE2 | NE2 | . GLN GLN GLN A A 408 408 . | 0.1966 | 0.1780 | 0.2223 | -0.0441 | -0.0211 |   |
| 0.0501 | 1   | .   |                             |        |        |        |         |         |   |
| 3110   | C   | C   | . GLN GLN GLN A A 408 408 . | 0.0752 | 0.0777 | 0.0767 | 0.0017  | 0.0109  | - |
| 0.0002 | 1   | .   |                             |        |        |        |         |         |   |
| 3111   | O   | O   | . GLN GLN GLN A A 408 408 . | 0.0717 | 0.0947 | 0.0911 | -0.0075 | 0.0118  |   |
| 0.0020 | 1   | .   |                             |        |        |        |         |         |   |
| 3112   | N   | N   | . LEU LEU LEU A A 409 409 . | 0.0894 | 0.0772 | 0.0663 | 0.0016  | -0.0060 | - |
| 0.0116 | 1   | .   |                             |        |        |        |         |         |   |

|        |     |     |                             |        |        |        |         |         |   |
|--------|-----|-----|-----------------------------|--------|--------|--------|---------|---------|---|
| 3113   | CA  | CA  | . LEU LEU LEU A A 409 409 . | 0.0601 | 0.0938 | 0.0837 | 0.0120  | 0.0013  | - |
| 0.0045 | 1   | .   |                             |        |        |        |         |         |   |
| 3114   | CB  | CB  | . LEU LEU LEU A A 409 409 . | 0.0689 | 0.0998 | 0.0779 | 0.0018  | -0.0191 | - |
| 0.0106 | 1   | .   |                             |        |        |        |         |         |   |
| 3115   | CG  | CG  | . LEU LEU LEU A A 409 409 . | 0.0822 | 0.0771 | 0.0958 | -0.0181 | -0.0066 |   |
| 0.0030 | 1   | .   |                             |        |        |        |         |         |   |
| 3116   | CD1 | CD1 | . LEU LEU LEU A A 409 409 . | 0.0980 | 0.1239 | 0.1065 | -0.0028 | -0.0154 |   |
| 0.0217 | 1   | .   |                             |        |        |        |         |         |   |
| 3117   | CD2 | CD2 | . LEU LEU LEU A A 409 409 . | 0.0890 | 0.0909 | 0.0904 | 0.0032  | 0.0011  | - |
| 0.0090 | 1   | .   |                             |        |        |        |         |         |   |
| 3118   | C   | C   | . LEU LEU LEU A A 409 409 . | 0.0760 | 0.0954 | 0.0807 | 0.0015  | -0.0030 | - |
| 0.0047 | 1   | .   |                             |        |        |        |         |         |   |
| 3119   | O   | O   | . LEU LEU LEU A A 409 409 . | 0.0777 | 0.1067 | 0.0873 | 0.0029  | 0.0119  |   |
| 0.0087 | 1   | .   |                             |        |        |        |         |         |   |
| 3120   | N   | N   | . MET MET MET A A 410 410 . | 0.0781 | 0.0916 | 0.1203 | 0.0201  | -0.0043 |   |
| 0.0023 | 1   | .   |                             |        |        |        |         |         |   |
| 3121   | CA  | CA  | . MET MET MET A A 410 410 . | 0.0953 | 0.0766 | 0.0934 | 0.0141  | 0.0013  | - |
| 0.0050 | 1   | .   |                             |        |        |        |         |         |   |
| 3122   | CB  | CB  | . MET MET MET A A 410 410 . | 0.0981 | 0.0955 | 0.1161 | -0.0054 | -0.0058 |   |
| 0.0164 | 1   | .   |                             |        |        |        |         |         |   |
| 3123   | CG  | CG  | . MET MET MET A A 410 410 . | 0.1383 | 0.1237 | 0.1330 | -0.0190 | -0.0191 |   |
| 0.0552 | 1   | .   |                             |        |        |        |         |         |   |
| 3124   | SD  | SD  | . MET MET MET A A 410 410 . | 0.1564 | 0.1409 | 0.1597 | -0.0001 | -0.0086 |   |
| 0.0098 | 1   | .   |                             |        |        |        |         |         |   |
| 3125   | CE  | CE  | . MET MET MET A A 410 410 . | 0.1166 | 0.1255 | 0.0637 | -0.0113 | 0.0180  | - |
| 0.0087 | 1   | .   |                             |        |        |        |         |         |   |
| 3126   | C   | C   | . MET MET MET A A 410 410 . | 0.0924 | 0.1090 | 0.0963 | 0.0019  | 0.0049  | - |
| 0.0081 | 1   | .   |                             |        |        |        |         |         |   |
| 3127   | O   | O   | . MET MET MET A A 410 410 . | 0.1137 | 0.1386 | 0.1152 | -0.0005 | 0.0255  | - |
| 0.0001 | 1   | .   |                             |        |        |        |         |         |   |
| 3128   | N   | N   | . ARG ARG ARG A A 411 411 . | 0.0840 | 0.0934 | 0.0824 | -0.0063 | -0.0118 | - |
| 0.0006 | 1   | .   |                             |        |        |        |         |         |   |
| 3129   | CA  | CA  | . ARG ARG ARG A A 411 411 . | 0.0964 | 0.1094 | 0.0801 | -0.0074 | 0.0015  | - |
| 0.0059 | 1   | .   |                             |        |        |        |         |         |   |
| 3130   | CB  | CB  | . ARG ARG ARG A A 411 411 . | 0.1023 | 0.1177 | 0.1079 | -0.0201 | -0.0027 | - |
| 0.0026 | 1   | .   |                             |        |        |        |         |         |   |
| 3131   | CG  | CG  | . ARG ARG ARG A A 411 411 . | 0.1478 | 0.1049 | 0.0986 | 0.0001  | -0.0087 |   |
| 0.0092 | 1   | .   |                             |        |        |        |         |         |   |
| 3132   | CD  | CD  | . ARG ARG ARG A A 411 411 . | 0.1358 | 0.1454 | 0.0841 | -0.0335 | -0.0231 |   |
| 0.0224 | 1   | .   |                             |        |        |        |         |         |   |
| 3133   | NE  | NE  | . ARG ARG ARG A A 411 411 . | 0.0883 | 0.1473 | 0.1296 | -0.0004 | 0.0179  | - |
| 0.0081 | 1   | .   |                             |        |        |        |         |         |   |
| 3134   | CZ  | CZ  | . ARG ARG ARG A A 411 411 . | 0.0781 | 0.1100 | 0.1047 | 0.0149  | 0.0092  |   |
| 0.0071 | 1   | .   |                             |        |        |        |         |         |   |
| 3135   | NH1 | NH1 | . ARG ARG ARG A A 411 411 . | 0.1130 | 0.1231 | 0.1319 | 0.0130  | -0.0146 |   |
| 0.0196 | 1   | .   |                             |        |        |        |         |         |   |
| 3136   | NH2 | NH2 | . ARG ARG ARG A A 411 411 . | 0.1476 | 0.1411 | 0.1556 | -0.0184 | 0.0071  |   |
| 0.0243 | 1   | .   |                             |        |        |        |         |         |   |
| 3137   | C   | C   | . ARG ARG ARG A A 411 411 . | 0.1143 | 0.1426 | 0.0920 | 0.0073  | 0.0041  | - |
| 0.0149 | 1   | .   |                             |        |        |        |         |         |   |
| 3138   | O   | O   | . ARG ARG ARG A A 411 411 . | 0.1088 | 0.1895 | 0.1140 | 0.0126  | 0.0319  |   |
| 0.0018 | 1   | .   |                             |        |        |        |         |         |   |
| 3139   | N   | N   | . ILE ILE ILE A A 412 412 . | 0.1117 | 0.1006 | 0.0935 | 0.0021  | 0.0019  |   |
| 0.0049 | 1   | .   |                             |        |        |        |         |         |   |
| 3140   | CA  | CA  | . ILE ILE ILE A A 412 412 . | 0.1004 | 0.1146 | 0.0866 | 0.0046  | 0.0035  | - |
| 0.0051 | 1   | .   |                             |        |        |        |         |         |   |
| 3141   | CB  | CB  | . ILE ILE ILE A A 412 412 . | 0.1235 | 0.1260 | 0.0827 | 0.0153  | 0.0150  |   |
| 0.0083 | 1   | .   |                             |        |        |        |         |         |   |
| 3142   | CG1 | CG1 | . ILE ILE ILE A A 412 412 . | 0.0952 | 0.0956 | 0.0936 | -0.0045 | 0.0159  |   |
| 0.0028 | 1   | .   |                             |        |        |        |         |         |   |





|        |     |     |                             |        |        |        |         |         |   |
|--------|-----|-----|-----------------------------|--------|--------|--------|---------|---------|---|
| 3173   | O   | O   | . GLU GLU GLU A A 415 415 . | 0.1650 | 0.3351 | 0.2149 | -0.0084 | 0.0475  | - |
| 0.0547 | 1   | .   |                             |        |        |        |         |         |   |
| 3174   | N   | N   | . LEU LEU LEU A A 416 416 . | 0.1871 | 0.2702 | 0.1335 | -0.0239 | 0.0247  | - |
| 0.0135 | 1   | .   |                             |        |        |        |         |         |   |
| 3175   | CA  | CA  | . LEU LEU LEU A A 416 416 . | 0.1950 | 0.2253 | 0.1470 | -0.0178 | 0.0237  | - |
| 0.0082 | 1   | .   |                             |        |        |        |         |         |   |
| 3176   | CB  | CB  | . LEU LEU LEU A A 416 416 . | 0.1880 | 0.1961 | 0.1409 | -0.0192 | 0.0227  | - |
| 0.0122 | 1   | .   |                             |        |        |        |         |         |   |
| 3177   | CG  | CG  | . LEU LEU LEU A A 416 416 . | 0.1742 | 0.1816 | 0.1648 | -0.0180 | 0.0215  | - |
| 0.0052 | 1   | .   |                             |        |        |        |         |         |   |
| 3178   | CD1 | CD1 | . LEU LEU LEU A A 416 416 . | 0.2306 | 0.1866 | 0.1846 | 0.0982  | -0.0025 | - |
| 0.0637 | 1   | .   |                             |        |        |        |         |         |   |
| 3179   | CD2 | CD2 | . LEU LEU LEU A A 416 416 . | 0.3188 | 0.2341 | 0.2712 | -0.0429 | 0.0933  | - |
| 0.0156 | 1   | .   |                             |        |        |        |         |         |   |
| 3180   | C   | C   | . LEU LEU LEU A A 416 416 . | 0.2009 | 0.2629 | 0.1908 | -0.0004 | 0.0286  | - |
| 0.0054 | 1   | .   |                             |        |        |        |         |         |   |
| 3181   | O   | O   | . LEU LEU LEU A A 416 416 . | 0.1992 | 0.3050 | 0.1734 | -0.0100 | 0.0338  | - |
| 0.0179 | 1   | .   |                             |        |        |        |         |         |   |
| 3182   | N   | N   | . GLY GLY GLY A A 417 417 . | 0.2220 | 0.2730 | 0.2034 | 0.0157  | 0.0434  | - |
| 0.0244 | 1   | .   |                             |        |        |        |         |         |   |
| 3183   | CA  | CA  | . GLY GLY GLY A A 417 417 . | 0.2753 | 0.2999 | 0.2372 | 0.0358  | 0.0132  | - |
| 0.0272 | 1   | .   |                             |        |        |        |         |         |   |
| 3184   | C   | C   | . GLY GLY GLY A A 417 417 . | 0.2710 | 0.3207 | 0.2508 | 0.0183  | 0.0234  | - |
| 0.0241 | 1   | .   |                             |        |        |        |         |         |   |
| 3185   | O   | O   | . GLY GLY GLY A A 417 417 . | 0.2512 | 0.3098 | 0.2513 | 0.0481  | 0.0335  | - |
| 0.0384 | 1   | .   |                             |        |        |        |         |         |   |
| 3186   | N   | N   | . ASP ASP ASP A A 418 418 . | 0.2876 | 0.3536 | 0.2876 | 0.0415  | 0.0327  | - |
| 0.0315 | 1   | .   |                             |        |        |        |         |         |   |
| 3187   | CA  | CA  | . ASP ASP ASP A A 418 418 . | 0.3119 | 0.3761 | 0.3115 | 0.0250  | 0.0389  | - |
| 0.0238 | 1   | .   |                             |        |        |        |         |         |   |
| 3188   | CB  | CB  | . ASP ASP ASP A A 418 418 . | 0.3169 | 0.4054 | 0.3159 | 0.0349  | 0.0526  | - |
| 0.0313 | 1   | .   |                             |        |        |        |         |         |   |
| 3189   | CG  | CG  | . ASP ASP ASP A A 418 418 . | 0.4120 | 0.4465 | 0.4437 | 0.0391  | 0.0613  | - |
| 0.0278 | 1   | .   |                             |        |        |        |         |         |   |
| 3190   | OD1 | OD1 | . ASP ASP ASP A A 418 418 . | 0.4843 | 0.5533 | 0.5573 | 0.0873  | 0.1202  | - |
| 0.0835 | 1   | .   |                             |        |        |        |         |         |   |
| 3191   | OD2 | OD2 | . ASP ASP ASP A A 418 418 . | 0.5104 | 0.4481 | 0.5180 | 0.0139  | 0.0697  | - |
| 0.0283 | 1   | .   |                             |        |        |        |         |         |   |
| 3192   | C   | C   | . ASP ASP ASP A A 418 418 . | 0.2665 | 0.3816 | 0.3016 | 0.0126  | 0.0262  | - |
| 0.0198 | 1   | .   |                             |        |        |        |         |         |   |
| 3193   | O   | O   | . ASP ASP ASP A A 418 418 . | 0.3113 | 0.4168 | 0.3025 | 0.0029  | 0.0244  | - |
| 0.0184 | 1   | .   |                             |        |        |        |         |         |   |
| 3194   | N   | N   | . GLU GLU GLU A A 419 419 . | 0.2687 | 0.3784 | 0.2765 | 0.0115  | 0.0328  | - |
| 0.0020 | 1   | .   |                             |        |        |        |         |         |   |
| 3195   | CA  | CA  | . GLU GLU GLU A A 419 419 . | 0.2858 | 0.3732 | 0.2961 | 0.0080  | 0.0378  | - |
| 0.0107 | 1   | .   |                             |        |        |        |         |         |   |
| 3196   | CB  | CB  | . GLU GLU GLU A A 419 419 . | 0.3015 | 0.3889 | 0.3339 | -0.0110 | 0.0531  | - |
| 0.0182 | 1   | .   |                             |        |        |        |         |         |   |
| 3197   | CG  | CG  | . GLU GLU GLU A A 419 419 . | 0.4627 | 0.4588 | 0.4545 | -0.0051 | 0.0234  | - |
| 0.0217 | 1   | .   |                             |        |        |        |         |         |   |
| 3198   | CD  | CD  | . GLU GLU GLU A A 419 419 . | 0.5332 | 0.5186 | 0.5517 | -0.0375 | 0.0464  | - |
| 0.0362 | 1   | .   |                             |        |        |        |         |         |   |
| 3199   | OE1 | OE1 | . GLU GLU GLU A A 419 419 . | 0.5791 | 0.4509 | 0.5172 | -0.0867 | 0.1301  | - |
| 0.0461 | 1   | .   |                             |        |        |        |         |         |   |
| 3200   | OE2 | OE2 | . GLU GLU GLU A A 419 419 . | 0.5507 | 0.6137 | 0.6456 | 0.0107  | 0.0342  | - |
| 0.0018 | 1   | .   |                             |        |        |        |         |         |   |
| 3201   | C   | C   | . GLU GLU GLU A A 419 419 . | 0.2648 | 0.3514 | 0.2800 | -0.0019 | 0.0199  | - |
| 0.0290 | 1   | .   |                             |        |        |        |         |         |   |
| 3202   | O   | O   | . GLU GLU GLU A A 419 419 . | 0.2729 | 0.3791 | 0.2979 | 0.0074  | 0.0391  | - |
| 0.0517 | 1   | .   |                             |        |        |        |         |         |   |

|        |     |     |                   |         |                                          |
|--------|-----|-----|-------------------|---------|------------------------------------------|
| 3203   | N   | N   | . ALA ALA ALA A A | 420 420 | . 0.2314 0.3126 0.2319 -0.0036 0.0032    |
| 0.0136 | 1   | .   |                   |         |                                          |
| 3204   | CA  | CA  | . ALA ALA ALA A A | 420 420 | . 0.2173 0.2720 0.1971 -0.0163 -0.0144 - |
| 0.0012 | 1   | .   |                   |         |                                          |
| 3205   | CB  | CB  | . ALA ALA ALA A A | 420 420 | . 0.2342 0.2548 0.2053 -0.0078 0.0219    |
| 0.0018 | 1   | .   |                   |         |                                          |
| 3206   | C   | C   | . ALA ALA ALA A A | 420 420 | . 0.2133 0.2561 0.2109 0.0038 -0.0096 -  |
| 0.0302 | 1   | .   |                   |         |                                          |
| 3207   | O   | O   | . ALA ALA ALA A A | 420 420 | . 0.2265 0.2858 0.2361 -0.0035 -0.0329 - |
| 0.0377 | 1   | .   |                   |         |                                          |
| 3208   | N   | N   | . ARG ARG ARG A A | 421 421 | . 0.1835 0.2532 0.1639 0.0044 0.0118 -   |
| 0.0159 | 1   | .   |                   |         |                                          |
| 3209   | CA  | CA  | . ARG ARG ARG A A | 421 421 | . 0.1579 0.2483 0.1874 -0.0167 0.0291 -  |
| 0.0161 | 1   | .   |                   |         |                                          |
| 3210   | CB  | CB  | . ARG ARG ARG A A | 421 421 | . 0.1974 0.3163 0.1984 0.0051 0.0563 -   |
| 0.0020 | 1   | .   |                   |         |                                          |
| 3211   | CG  | CG  | . ARG ARG ARG A A | 421 421 | . 0.2447 0.3880 0.2505 -0.0087 0.0689    |
| 0.0085 | 1   | .   |                   |         |                                          |
| 3212   | CD  | CD  | . ARG ARG ARG A A | 421 421 | . 0.4589 0.4010 0.4675 0.0063 -0.0061 -  |
| 0.0458 | 1   | .   |                   |         |                                          |
| 3213   | NE  | NE  | . ARG ARG ARG A A | 421 421 | . 0.5764 0.5922 0.5970 -0.0125 -0.0278 - |
| 0.0474 | 1   | .   |                   |         |                                          |
| 3214   | CZ  | CZ  | . ARG ARG ARG A A | 421 421 | . 0.6421 0.6130 0.6512 -0.0211 -0.0391 - |
| 0.0316 | 1   | .   |                   |         |                                          |
| 3215   | NH1 | NH1 | . ARG ARG ARG A A | 421 421 | . 0.7075 0.6481 0.6659 -0.0013 -0.0039   |
| 0.0011 | 1   | .   |                   |         |                                          |
| 3216   | NH2 | NH2 | . ARG ARG ARG A A | 421 421 | . 0.6385 0.6527 0.6173 -0.0082 -0.0720 - |
| 0.0344 | 1   | .   |                   |         |                                          |
| 3217   | C   | C   | . ARG ARG ARG A A | 421 421 | . 0.1749 0.2310 0.1954 -0.0038 0.0363 -  |
| 0.0252 | 1   | .   |                   |         |                                          |
| 3218   | O   | O   | . ARG ARG ARG A A | 421 421 | . 0.1951 0.2628 0.2465 -0.0294 0.0765 -  |
| 0.0578 | 1   | .   |                   |         |                                          |
| 3219   | N   | N   | . PHE PHE PHE A A | 422 422 | . 0.1499 0.1708 0.1302 0.0020 0.0161 -   |
| 0.0075 | 1   | .   |                   |         |                                          |
| 3220   | CA  | CA  | . PHE PHE PHE A A | 422 422 | . 0.1173 0.1594 0.1253 0.0190 0.0055     |
| 0.0102 | 1   | .   |                   |         |                                          |
| 3221   | CB  | CB  | . PHE PHE PHE A A | 422 422 | . 0.1018 0.1457 0.1433 0.0012 0.0292 -   |
| 0.0196 | 1   | .   |                   |         |                                          |
| 3222   | CG  | CG  | . PHE PHE PHE A A | 422 422 | . 0.1252 0.1303 0.1094 0.0047 0.0211     |
| 0.0094 | 1   | .   |                   |         |                                          |
| 3223   | CD1 | CD1 | . PHE PHE PHE A A | 422 422 | . 0.0858 0.1320 0.0980 0.0112 -0.0081 -  |
| 0.0096 | 1   | .   |                   |         |                                          |
| 3224   | CE1 | CE1 | . PHE PHE PHE A A | 422 422 | . 0.1063 0.1323 0.0895 0.0027 0.0323 -   |
| 0.0189 | 1   | .   |                   |         |                                          |
| 3225   | CZ  | CZ  | . PHE PHE PHE A A | 422 422 | . 0.1500 0.1328 0.0876 0.0000 -0.0196    |
| 0.0180 | 1   | .   |                   |         |                                          |
| 3226   | CE2 | CE2 | . PHE PHE PHE A A | 422 422 | . 0.1223 0.1055 0.1259 0.0163 0.0054     |
| 0.0139 | 1   | .   |                   |         |                                          |
| 3227   | CD2 | CD2 | . PHE PHE PHE A A | 422 422 | . 0.1475 0.1469 0.1011 0.0170 -0.0117    |
| 0.0036 | 1   | .   |                   |         |                                          |
| 3228   | C   | C   | . PHE PHE PHE A A | 422 422 | . 0.1125 0.1513 0.1373 0.0127 -0.0120 -  |
| 0.0178 | 1   | .   |                   |         |                                          |
| 3229   | O   | O   | . PHE PHE PHE A A | 422 422 | . 0.1588 0.2073 0.1235 0.0209 -0.0117 -  |
| 0.0158 | 1   | .   |                   |         |                                          |
| 3230   | N   | N   | . ALA ALA ALA A A | 423 423 | . 0.1160 0.1211 0.1160 0.0082 -0.0085 -  |
| 0.0003 | 1   | .   |                   |         |                                          |
| 3231   | CA  | CA  | . ALA ALA ALA A A | 423 423 | . 0.1374 0.1138 0.1153 0.0072 -0.0165    |
| 0.0025 | 1   | .   |                   |         |                                          |
| 3232   | CB  | CB  | . ALA ALA ALA A A | 423 423 | . 0.1343 0.1302 0.1104 0.0175 -0.0109 -  |
| 0.0247 | 1   | .   |                   |         |                                          |

|        |     |     |                             |        |        |        |         |         |   |
|--------|-----|-----|-----------------------------|--------|--------|--------|---------|---------|---|
| 3233   | C   | C   | . ALA ALA ALA A A 423 423 . | 0.1154 | 0.1293 | 0.1155 | -0.0075 | -0.0225 |   |
| 0.0117 | 1   | .   |                             |        |        |        |         |         |   |
| 3234   | O   | O   | . ALA ALA ALA A A 423 423 . | 0.1485 | 0.1685 | 0.1011 | -0.0103 | -0.0074 |   |
| 0.0172 | 1   | .   |                             |        |        |        |         |         |   |
| 3235   | N   | N   | . GLY GLY GLY A A 424 424 . | 0.1171 | 0.1124 | 0.0862 | -0.0080 | -0.0015 | - |
| 0.0090 | 1   | .   |                             |        |        |        |         |         |   |
| 3236   | CA  | CA  | . GLY GLY GLY A A 424 424 . | 0.1147 | 0.1322 | 0.0977 | -0.0219 | -0.0097 |   |
| 0.0025 | 1   | .   |                             |        |        |        |         |         |   |
| 3237   | C   | C   | . GLY GLY GLY A A 424 424 . | 0.1143 | 0.1314 | 0.1181 | -0.0162 | -0.0096 | - |
| 0.0071 | 1   | .   |                             |        |        |        |         |         |   |
| 3238   | O   | O   | . GLY GLY GLY A A 424 424 . | 0.1309 | 0.1312 | 0.1298 | -0.0050 | -0.0041 | - |
| 0.0038 | 1   | .   |                             |        |        |        |         |         |   |
| 3239   | N   | N   | . HIS HIS HIS A A 425 425 . | 0.1431 | 0.1355 | 0.0942 | 0.0029  | -0.0235 | - |
| 0.0196 | 1   | .   |                             |        |        |        |         |         |   |
| 3240   | CA  | CA  | . HIS HIS HIS A A 425 425 . | 0.1243 | 0.1208 | 0.1242 | -0.0053 | -0.0136 | - |
| 0.0172 | 1   | .   |                             |        |        |        |         |         |   |
| 3241   | CB  | CB  | . HIS HIS HIS A A 425 425 . | 0.1730 | 0.1379 | 0.0831 | -0.0101 | -0.0092 | - |
| 0.0317 | 1   | .   |                             |        |        |        |         |         |   |
| 3242   | CG  | CG  | . HIS HIS HIS A A 425 425 . | 0.1466 | 0.1103 | 0.1288 | 0.0192  | -0.0348 | - |
| 0.0495 | 1   | .   |                             |        |        |        |         |         |   |
| 3243   | ND1 | ND1 | . HIS HIS HIS A A 425 425 . | 0.2319 | 0.1540 | 0.1887 | 0.0051  | 0.0128  | - |
| 0.0020 | 1   | .   |                             |        |        |        |         |         |   |
| 3244   | CE1 | CE1 | . HIS HIS HIS A A 425 425 . | 0.2606 | 0.1346 | 0.1108 | -0.0089 | -0.0281 | - |
| 0.0458 | 1   | .   |                             |        |        |        |         |         |   |
| 3245   | NE2 | NE2 | . HIS HIS HIS A A 425 425 . | 0.2602 | 0.1686 | 0.1567 | -0.0048 | -0.0206 | - |
| 0.0269 | 1   | .   |                             |        |        |        |         |         |   |
| 3246   | CD2 | CD2 | . HIS HIS HIS A A 425 425 . | 0.2312 | 0.1873 | 0.1576 | 0.0069  | -0.0387 | - |
| 0.0352 | 1   | .   |                             |        |        |        |         |         |   |
| 3247   | C   | C   | . HIS HIS HIS A A 425 425 . | 0.1010 | 0.1154 | 0.0981 | 0.0007  | -0.0006 | - |
| 0.0085 | 1   | .   |                             |        |        |        |         |         |   |
| 3248   | O   | O   | . HIS HIS HIS A A 425 425 . | 0.1558 | 0.1379 | 0.1399 | 0.0136  | -0.0082 |   |
| 0.0188 | 1   | .   |                             |        |        |        |         |         |   |
| 3249   | N   | N   | . ASN ASN ASN A A 426 426 . | 0.1401 | 0.1208 | 0.1050 | -0.0165 | 0.0053  | - |
| 0.0050 | 1   | .   |                             |        |        |        |         |         |   |
| 3250   | CA  | CA  | . ASN ASN ASN A A 426 426 . | 0.1404 | 0.1291 | 0.1466 | 0.0092  | 0.0005  |   |
| 0.0073 | 1   | .   |                             |        |        |        |         |         |   |
| 3251   | CB  | CB  | . ASN ASN ASN A A 426 426 . | 0.1681 | 0.1570 | 0.1341 | 0.0108  | 0.0054  | - |
| 0.0226 | 1   | .   |                             |        |        |        |         |         |   |
| 3252   | CG  | CG  | . ASN ASN ASN A A 426 426 . | 0.1924 | 0.1936 | 0.1615 | 0.0089  | -0.0128 | - |
| 0.0101 | 1   | .   |                             |        |        |        |         |         |   |
| 3253   | OD1 | OD1 | . ASN ASN ASN A A 426 426 . | 0.2724 | 0.2296 | 0.1813 | -0.0277 | -0.0322 |   |
| 0.0445 | 1   | .   |                             |        |        |        |         |         |   |
| 3254   | ND2 | ND2 | . ASN ASN ASN A A 426 426 . | 0.1679 | 0.1689 | 0.1340 | -0.0053 | 0.0228  | - |
| 0.0282 | 1   | .   |                             |        |        |        |         |         |   |
| 3255   | C   | C   | . ASN ASN ASN A A 426 426 . | 0.1778 | 0.1648 | 0.1544 | -0.0265 | 0.0119  | - |
| 0.0189 | 1   | .   |                             |        |        |        |         |         |   |
| 3256   | O   | O   | . ASN ASN ASN A A 426 426 . | 0.2191 | 0.1735 | 0.1743 | -0.0281 | 0.0344  | - |
| 0.0106 | 1   | .   |                             |        |        |        |         |         |   |
| 3257   | N   | N   | . PHE PHE PHE A A 427 427 . | 0.1551 | 0.1497 | 0.1347 | -0.0267 | 0.0130  | - |
| 0.0212 | 1   | .   |                             |        |        |        |         |         |   |
| 3258   | CA  | CA  | . PHE PHE PHE A A 427 427 . | 0.1878 | 0.1485 | 0.1318 | -0.0180 | 0.0154  | - |
| 0.0260 | 1   | .   |                             |        |        |        |         |         |   |
| 3259   | CB  | CB  | . PHE PHE PHE A A 427 427 . | 0.1601 | 0.1746 | 0.1232 | -0.0397 | 0.0109  | - |
| 0.0265 | 1   | .   |                             |        |        |        |         |         |   |
| 3260   | CG  | CG  | . PHE PHE PHE A A 427 427 . | 0.1290 | 0.1249 | 0.1245 | 0.0156  | -0.0216 |   |
| 0.0079 | 1   | .   |                             |        |        |        |         |         |   |
| 3261   | CD1 | CD1 | . PHE PHE PHE A A 427 427 . | 0.1519 | 0.1306 | 0.1180 | 0.0056  | 0.0026  | - |
| 0.0028 | 1   | .   |                             |        |        |        |         |         |   |
| 3262   | CE1 | CE1 | . PHE PHE PHE A A 427 427 . | 0.1626 | 0.1667 | 0.1787 | 0.0175  | 0.0211  | - |
| 0.0013 | 1   | .   |                             |        |        |        |         |         |   |

|        |     |     |                             |        |        |        |         |         |   |
|--------|-----|-----|-----------------------------|--------|--------|--------|---------|---------|---|
| 3263   | CZ  | CZ  | . PHE PHE PHE A A 427 427 . | 0.1524 | 0.1547 | 0.1621 | -0.0133 | 0.0323  |   |
| 0.0031 | 1   | .   |                             |        |        |        |         |         |   |
| 3264   | CE2 | CE2 | . PHE PHE PHE A A 427 427 . | 0.1993 | 0.2001 | 0.1930 | -0.0057 | 0.0027  | - |
| 0.0001 | 1   | .   |                             |        |        |        |         |         |   |
| 3265   | CD2 | CD2 | . PHE PHE PHE A A 427 427 . | 0.1828 | 0.1819 | 0.2155 | -0.0026 | -0.0208 | - |
| 0.0120 | 1   | .   |                             |        |        |        |         |         |   |
| 3266   | C   | C   | . PHE PHE PHE A A 427 427 . | 0.1694 | 0.1428 | 0.1603 | -0.0204 | 0.0015  | - |
| 0.0231 | 1   | .   |                             |        |        |        |         |         |   |
| 3267   | O   | O   | . PHE PHE PHE A A 427 427 . | 0.2034 | 0.1484 | 0.1507 | -0.0024 | 0.0018  | - |
| 0.0396 | 1   | .   |                             |        |        |        |         |         |   |
| 3268   | N   | N   | . ARG ARG ARG A A 428 428 . | 0.1696 | 0.1637 | 0.1529 | 0.0179  | 0.0094  | - |
| 0.0117 | 1   | .   |                             |        |        |        |         |         |   |
| 3269   | CA  | CA  | . ARG ARG ARG A A 428 428 . | 0.1919 | 0.1775 | 0.2009 | 0.0067  | 0.0042  | - |
| 0.0146 | 1   | .   |                             |        |        |        |         |         |   |
| 3270   | CB  | CB  | . ARG ARG ARG A A 428 428 . | 0.1986 | 0.1855 | 0.1956 | 0.0147  | -0.0099 | - |
| 0.0202 | 1   | .   |                             |        |        |        |         |         |   |
| 3271   | CG  | CG  | . ARG ARG ARG A A 428 428 . | 0.1987 | 0.1797 | 0.1922 | 0.0075  | -0.0070 |   |
| 0.0000 | 1   | .   |                             |        |        |        |         |         |   |
| 3272   | CD  | CD  | . ARG ARG ARG A A 428 428 . | 0.1877 | 0.2553 | 0.2189 | 0.0524  | 0.0000  | - |
| 0.0074 | 1   | .   |                             |        |        |        |         |         |   |
| 3273   | NE  | NE  | . ARG ARG ARG A A 428 428 . | 0.2191 | 0.2713 | 0.1924 | 0.0372  | 0.0101  | - |
| 0.0147 | 1   | .   |                             |        |        |        |         |         |   |
| 3274   | CZ  | CZ  | . ARG ARG ARG A A 428 428 . | 0.2610 | 0.2817 | 0.2814 | 0.0450  | -0.0044 | - |
| 0.0533 | 1   | .   |                             |        |        |        |         |         |   |
| 3275   | NH1 | NH1 | . ARG ARG ARG A A 428 428 . | 0.2148 | 0.3577 | 0.2552 | 0.0108  | -0.0318 | - |
| 0.0992 | 1   | .   |                             |        |        |        |         |         |   |
| 3276   | NH2 | NH2 | . ARG ARG ARG A A 428 428 . | 0.2942 | 0.3469 | 0.2044 | 0.0814  | -0.0022 | - |
| 0.0388 | 1   | .   |                             |        |        |        |         |         |   |
| 3277   | C   | C   | . ARG ARG ARG A A 428 428 . | 0.2508 | 0.2035 | 0.2352 | -0.0060 | 0.0116  | - |
| 0.0036 | 1   | .   |                             |        |        |        |         |         |   |
| 3278   | O   | O   | . ARG ARG ARG A A 428 428 . | 0.2850 | 0.2000 | 0.2717 | 0.0144  | 0.0213  |   |
| 0.0094 | 1   | .   |                             |        |        |        |         |         |   |
| 3279   | N   | N   | . ASN ASN ASN A A 429 429 . | 0.2254 | 0.2232 | 0.2173 | -0.0313 | 0.0155  | - |
| 0.0050 | 1   | .   |                             |        |        |        |         |         |   |
| 3280   | CA  | CA  | . ASN ASN ASN A A 429 429 . | 0.3031 | 0.2690 | 0.2265 | -0.0381 | 0.0212  |   |
| 0.0104 | 1   | .   |                             |        |        |        |         |         |   |
| 3281   | CB  | CB  | . ASN ASN ASN A A 429 429 . | 0.3142 | 0.3337 | 0.2931 | -0.0368 | -0.0039 |   |
| 0.0191 | 1   | .   |                             |        |        |        |         |         |   |
| 3282   | CG  | CG  | . ASN ASN ASN A A 429 429 . | 0.4258 | 0.3899 | 0.3725 | -0.0237 | 0.0002  |   |
| 0.0231 | 1   | .   |                             |        |        |        |         |         |   |
| 3283   | OD1 | OD1 | . ASN ASN ASN A A 429 429 . | 0.4774 | 0.3113 | 0.3989 | 0.0359  | -0.0793 | - |
| 0.0030 | 1   | .   |                             |        |        |        |         |         |   |
| 3284   | ND2 | ND2 | . ASN ASN ASN A A 429 429 . | 0.4620 | 0.4900 | 0.4265 | -0.0091 | -0.0180 | - |
| 0.0479 | 1   | .   |                             |        |        |        |         |         |   |
| 3285   | C   | C   | . ASN ASN ASN A A 429 429 . | 0.2606 | 0.2401 | 0.2161 | -0.0487 | 0.0258  |   |
| 0.0008 | 1   | .   |                             |        |        |        |         |         |   |
| 3286   | O   | O   | . ASN ASN ASN A A 429 429 . | 0.3194 | 0.2670 | 0.2128 | -0.0607 | 0.0165  | - |
| 0.0006 | 1   | .   |                             |        |        |        |         |         |   |
| 3287   | N   | N   | . PRO PRO PRO A A 430 430 . | 0.2729 | 0.2222 | 0.1933 | -0.0432 | 0.0306  | - |
| 0.0156 | 1   | .   |                             |        |        |        |         |         |   |
| 3288   | CA  | CA  | . PRO PRO PRO A A 430 430 . | 0.2625 | 0.2310 | 0.1934 | -0.0411 | 0.0314  | - |
| 0.0273 | 1   | .   |                             |        |        |        |         |         |   |
| 3289   | CB  | CB  | . PRO PRO PRO A A 430 430 . | 0.2527 | 0.2599 | 0.2333 | -0.0464 | 0.0119  | - |
| 0.0172 | 1   | .   |                             |        |        |        |         |         |   |
| 3290   | CG  | CG  | . PRO PRO PRO A A 430 430 . | 0.2917 | 0.2143 | 0.2143 | -0.0370 | 0.0317  | - |
| 0.0161 | 1   | .   |                             |        |        |        |         |         |   |
| 3291   | CD  | CD  | . PRO PRO PRO A A 430 430 . | 0.2809 | 0.2268 | 0.1900 | -0.0323 | 0.0511  | - |
| 0.0263 | 1   | .   |                             |        |        |        |         |         |   |
| 3292   | C   | C   | . PRO PRO PRO A A 430 430 . | 0.2779 | 0.2737 | 0.2354 | -0.0356 | 0.0151  | - |
| 0.0415 | 1   | .   |                             |        |        |        |         |         |   |

|        |      |      |                             |        |        |        |         |         |   |
|--------|------|------|-----------------------------|--------|--------|--------|---------|---------|---|
| 3293   | O    | O    | . PRO PRO PRO A A 430 430 . | 0.2929 | 0.3016 | 0.2338 | -0.0436 | 0.0261  | - |
| 0.0568 | 1    | .    |                             |        |        |        |         |         |   |
| 3294   | N    | N    | . SER SER SER A A 431 431 . | 0.3204 | 0.2939 | 0.2202 | -0.0518 | 0.0312  | - |
| 0.0271 | 1    | .    |                             |        |        |        |         |         |   |
| 3295   | CA   | CA   | . SER SER SER A A 431 431 . | 0.3448 | 0.3482 | 0.3095 | -0.0526 | 0.0255  | - |
| 0.0059 | 1    | .    |                             |        |        |        |         |         |   |
| 3296   | CB   | CB   | . SER SER SER A A 431 431 . | 0.3709 | 0.3599 | 0.3271 | -0.0509 | 0.0079  | - |
| 0.0001 | 1    | .    |                             |        |        |        |         |         |   |
| 3297   | OG   | OG   | . SER SER SER A A 431 431 . | 0.4069 | 0.4351 | 0.3331 | -0.0350 | 0.0327  | - |
| 0.0765 | 1    | .    |                             |        |        |        |         |         |   |
| 3298   | C    | C    | . SER SER SER A A 431 431 . | 0.3450 | 0.3642 | 0.3160 | -0.0547 | 0.0291  | - |
| 0.0221 | 1    | .    |                             |        |        |        |         |         |   |
| 3299   | O    | O    | . SER SER SER A A 431 431 . | 0.3593 | 0.4235 | 0.3240 | -0.0645 | 0.0350  | - |
| 0.0158 | 1    | .    |                             |        |        |        |         |         |   |
| 3300   | N    | N    | . VAL VAL VAL A A 432 432 . | 0.3463 | 0.3713 | 0.3135 | -0.0459 | 0.0230  | - |
| 0.0285 | 1    | .    |                             |        |        |        |         |         |   |
| 3301   | CA   | CA   | . VAL VAL VAL A A 432 432 . | 0.3523 | 0.3866 | 0.3148 | -0.0363 | 0.0208  | - |
| 0.0399 | 1    | .    |                             |        |        |        |         |         |   |
| 3302   | CB   | CB   | . VAL VAL VAL A A 432 432 . | 0.3610 | 0.3729 | 0.3108 | -0.0411 | 0.0193  | - |
| 0.0437 | 1    | .    |                             |        |        |        |         |         |   |
| 3303   | CG1  | CG1  | . VAL VAL VAL A A 432 432 . | 0.3407 | 0.4145 | 0.2981 | -0.0504 | -0.0147 | - |
| 0.0650 | 1    | .    |                             |        |        |        |         |         |   |
| 3304   | CG2  | CG2  | . VAL VAL VAL A A 432 432 . | 0.3802 | 0.3896 | 0.3170 | -0.0358 | 0.0348  | - |
| 0.0707 | 1    | .    |                             |        |        |        |         |         |   |
| 3305   | C    | C    | . VAL VAL VAL A A 432 432 . | 0.3643 | 0.3993 | 0.3449 | -0.0295 | 0.0281  | - |
| 0.0273 | 1    | .    |                             |        |        |        |         |         |   |
| 3306   | O    | O    | . VAL VAL VAL A A 432 432 . | 0.3337 | 0.4209 | 0.3081 | -0.0466 | 0.0567  | - |
| 0.0160 | 1    | .    |                             |        |        |        |         |         |   |
| 3307   | N    | N    | . LEU LEU LEU A A 433 433 . | 0.3825 | 0.4392 | 0.3762 | -0.0385 | 0.0245  | - |
| 0.0179 | 1    | .    |                             |        |        |        |         |         |   |
| 3308   | CA   | CA   | . LEU LEU LEU A A 433 433 . | 0.4259 | 0.4559 | 0.4313 | -0.0301 | 0.0255  | - |
| 0.0209 | 1    | .    |                             |        |        |        |         |         |   |
| 3309   | CB   | CB   | . LEU LEU LEU A A 433 433 . | 0.4297 | 0.4529 | 0.4225 | -0.0454 | 0.0309  | - |
| 0.0203 | 1    | .    |                             |        |        |        |         |         |   |
| 3310   | CG   | CG   | . LEU LEU LEU A A 433 433 . | 0.4090 | 0.4046 | 0.3695 | -0.0543 | 0.0571  | - |
| 0.0510 | 1    | .    |                             |        |        |        |         |         |   |
| 3311   | CD1  | CD1  | . LEU LEU LEU A A 433 433 . | 0.4380 | 0.3674 | 0.3688 | -0.0833 | 0.0519  | - |
| 0.0184 | 1    | .    |                             |        |        |        |         |         |   |
| 3312   | CD2  | CD2  | . LEU LEU LEU A A 433 433 . | 0.4350 | 0.3756 | 0.4007 | -0.0789 | 0.0406  | - |
| 0.0564 | 1    | .    |                             |        |        |        |         |         |   |
| 3313   | C    | C    | . LEU LEU LEU A A 433 433 . | 0.4607 | 0.4960 | 0.4897 | -0.0252 | 0.0229  | - |
| 0.0220 | 1    | .    |                             |        |        |        |         |         |   |
| 3314   | O    | O    | . LEU LEU LEU A A 433 433 . | 0.4896 | 0.5008 | 0.5149 | -0.0258 | 0.0286  | - |
| 0.0425 | 1    | .    |                             |        |        |        |         |         |   |
| 3315   | MG+2 | MG+2 | . MG2 MG2 MG2 A . 440 440 . | 0.1034 | 0.0892 | 0.0882 | 0.0090  | -0.0063 | - |
| 0.0054 | 1    | .    |                             |        |        |        |         |         |   |
| 3316   | MG+2 | MG+2 | . MG2 MG2 MG2 A . 441 441 . | 0.0915 | 0.1023 | 0.1062 | 0.0034  | -0.0069 | - |
| 0.0010 | 1    | .    |                             |        |        |        |         |         |   |
| 3317   | O4P  | O4P  | . 2PG 2PG 2PG A . 442 442 . | 0.0807 | 0.0708 | 0.0942 | -0.0104 | -0.0266 | - |
| 0.0226 | 1    | .    |                             |        |        |        |         |         |   |
| 3318   | P    | P    | . 2PG 2PG 2PG A . 442 442 . | 0.0877 | 0.0952 | 0.0936 | 0.0054  | -0.0063 | - |
| 0.0069 | 1    | .    |                             |        |        |        |         |         |   |
| 3319   | O2P  | O2P  | . 2PG 2PG 2PG A . 442 442 . | 0.0956 | 0.0949 | 0.0781 | -0.0113 | -0.0038 | - |
| 0.0014 | 1    | .    |                             |        |        |        |         |         |   |
| 3320   | O3P  | O3P  | . 2PG 2PG 2PG A . 442 442 . | 0.1055 | 0.0878 | 0.1083 | 0.0086  | 0.0074  | - |
| 0.0236 | 1    | .    |                             |        |        |        |         |         |   |
| 3321   | O1P  | O1P  | . 2PG 2PG 2PG A . 442 442 . | 0.1040 | 0.0953 | 0.0896 | -0.0019 | -0.0024 | - |
| 0.0101 | 1    | .    |                             |        |        |        |         |         |   |
| 3322   | C2   | C2   | . 2PG 2PG 2PG A . 442 442 . | 0.1177 | 0.1258 | 0.0718 | 0.0290  | -0.0018 | - |
| 0.0272 | 1    | .    |                             |        |        |        |         |         |   |







|        |     |     |                         |                                          |
|--------|-----|-----|-------------------------|------------------------------------------|
| 3383   | C   | C   | . TRP TRP TRP B B 6 6   | . 0.1139 0.1210 0.1291 0.0074 0.0179 -   |
| 0.0027 | 1   | .   |                         |                                          |
| 3384   | O   | O   | . TRP TRP TRP B B 6 6   | . 0.1376 0.1243 0.1646 -0.0275 0.0159 -  |
| 0.0108 | 1   | .   |                         |                                          |
| 3385   | N   | N   | . ALA ALA ALA B B 7 7   | . 0.0936 0.1154 0.1103 -0.0053 0.0004    |
| 0.0079 | 1   | .   |                         |                                          |
| 3386   | CA  | CA  | . ALA ALA ALA B B 7 7   | . 0.0898 0.1162 0.1116 -0.0012 0.0051    |
| 0.0176 | 1   | .   |                         |                                          |
| 3387   | CB  | CB  | . ALA ALA ALA B B 7 7   | . 0.1349 0.1339 0.0926 0.0098 -0.0075    |
| 0.0208 | 1   | .   |                         |                                          |
| 3388   | C   | C   | . ALA ALA ALA B B 7 7   | . 0.1134 0.1211 0.0873 -0.0060 0.0045 -  |
| 0.0044 | 1   | .   |                         |                                          |
| 3389   | O   | O   | . ALA ALA ALA B B 7 7   | . 0.1023 0.1514 0.1099 0.0119 0.0112 -   |
| 0.0095 | 1   | .   |                         |                                          |
| 3390   | N   | N   | . ARG ARG ARG B B 8 8   | . 0.1086 0.1385 0.1234 0.0116 -0.0084    |
| 0.0140 | 1   | .   |                         |                                          |
| 3391   | CA  | CA  | . ARG ARG ARG B B 8 8   | . 0.1045 0.1284 0.0913 -0.0103 0.0066 -  |
| 0.0012 | 1   | .   |                         |                                          |
| 3392   | CB  | CB  | . ARG ARG ARG B B 8 8   | . 0.1021 0.1167 0.1029 0.0014 0.0200     |
| 0.0032 | 1   | .   |                         |                                          |
| 3393   | CG  | CG  | . ARG ARG ARG B B 8 8   | . 0.0994 0.1356 0.1252 0.0217 0.0163 -   |
| 0.0093 | 1   | .   |                         |                                          |
| 3394   | CD  | CD  | . ARG ARG ARG B B 8 8   | . 0.1361 0.1334 0.1878 -0.0244 0.0127    |
| 0.0408 | 1   | .   |                         |                                          |
| 3395   | NE  | NE  | . ARG ARG ARG B B 8 8   | . 0.1471 0.1668 0.1471 0.0180 0.0104     |
| 0.0334 | 1   | .   |                         |                                          |
| 3396   | CZ  | CZ  | . ARG ARG ARG B B 8 8   | . 0.1537 0.1555 0.1983 0.0103 0.0286     |
| 0.0249 | 1   | .   |                         |                                          |
| 3397   | NH1 | NH1 | . ARG ARG ARG B B 8 8   | . 0.1316 0.1543 0.1847 0.0056 -0.0018    |
| 0.0094 | 1   | .   |                         |                                          |
| 3398   | NH2 | NH2 | . ARG ARG ARG B B 8 8   | . 0.2036 0.2352 0.3122 -0.0109 0.1033    |
| 0.0281 | 1   | .   |                         |                                          |
| 3399   | C   | C   | . ARG ARG ARG B B 8 8   | . 0.1050 0.1116 0.1049 0.0013 0.0020 -   |
| 0.0019 | 1   | .   |                         |                                          |
| 3400   | O   | O   | . ARG ARG ARG B B 8 8   | . 0.1094 0.1558 0.0905 0.0041 -0.0026 -  |
| 0.0150 | 1   | .   |                         |                                          |
| 3401   | N   | N   | . GLU GLU GLU B B 9 9   | . 0.0973 0.0985 0.1128 -0.0029 -0.0095 - |
| 0.0036 | 1   | .   |                         |                                          |
| 3402   | CA  | CA  | . GLU GLU GLU B B 9 9   | . 0.1347 0.1229 0.1307 0.0107 0.0049     |
| 0.0014 | 1   | .   |                         |                                          |
| 3403   | CB  | CB  | . GLU GLU GLU B B 9 9   | . 0.1432 0.1814 0.1252 -0.0509 0.0027 -  |
| 0.0320 | 1   | .   |                         |                                          |
| 3404   | CG  | CG  | . GLU GLU GLU B B 9 9   | . 0.2376 0.2059 0.2003 -0.0337 -0.0082 - |
| 0.0262 | 1   | .   |                         |                                          |
| 3405   | CD  | CD  | . GLU GLU GLU B B 9 9   | . 0.2193 0.1421 0.1649 -0.0583 -0.0326 - |
| 0.0090 | 1   | .   |                         |                                          |
| 3406   | OE1 | OE1 | . GLU GLU GLU B B 9 9   | . 0.1610 0.1169 0.1299 -0.0076 -0.0050   |
| 0.0230 | 1   | .   |                         |                                          |
| 3407   | OE2 | OE2 | . GLU GLU GLU B B 9 9   | . 0.2412 0.1876 0.1605 -0.0181 -0.0310 - |
| 0.0286 | 1   | .   |                         |                                          |
| 3408   | C   | C   | . GLU GLU GLU B B 9 9   | . 0.1139 0.1517 0.1136 0.0278 0.0001     |
| 0.0000 | 1   | .   |                         |                                          |
| 3409   | O   | O   | . GLU GLU GLU B B 9 9   | . 0.1758 0.2313 0.1686 0.0615 0.0428     |
| 0.0568 | 1   | .   |                         |                                          |
| 3410   | N   | N   | . ILE ILE ILE B B 10 10 | . 0.1147 0.0998 0.1088 0.0046 0.0100     |
| 0.0186 | 1   | .   |                         |                                          |
| 3411   | CA  | CA  | . ILE ILE ILE B B 10 10 | . 0.0946 0.1023 0.1065 0.0098 0.0045     |
| 0.0166 | 1   | .   |                         |                                          |
| 3412   | CB  | CB  | . ILE ILE ILE B B 10 10 | . 0.1010 0.1170 0.0830 -0.0152 -0.0034   |
| 0.0169 | 1   | .   |                         |                                          |

|        |     |     |                         |                                          |
|--------|-----|-----|-------------------------|------------------------------------------|
| 3413   | CG1 | CG1 | . ILE ILE ILE B B 10 10 | . 0.1105 0.1074 0.0925 0.0030 -0.0017    |
| 0.0161 | 1   | .   |                         |                                          |
| 3414   | CD  | CD  | . ILE ILE ILE B B 10 10 | . 0.1150 0.1577 0.1133 0.0168 -0.0048 -  |
| 0.0326 | 1   | .   |                         |                                          |
| 3415   | CG2 | CG2 | . ILE ILE ILE B B 10 10 | . 0.0872 0.1571 0.1509 -0.0242 0.0144    |
| 0.0133 | 1   | .   |                         |                                          |
| 3416   | C   | C   | . ILE ILE ILE B B 10 10 | . 0.0738 0.0856 0.1008 0.0121 -0.0028    |
| 0.0093 | 1   | .   |                         |                                          |
| 3417   | O   | O   | . ILE ILE ILE B B 10 10 | . 0.0816 0.0960 0.1085 0.0099 0.0086     |
| 0.0246 | 1   | .   |                         |                                          |
| 3418   | N   | N   | . LEU LEU LEU B B 11 11 | . 0.0646 0.1119 0.0894 0.0123 0.0006 -   |
| 0.0028 | 1   | .   |                         |                                          |
| 3419   | CA  | CA  | . LEU LEU LEU B B 11 11 | . 0.0712 0.0961 0.0744 0.0001 0.0001 -   |
| 0.0125 | 1   | .   |                         |                                          |
| 3420   | CB  | CB  | . LEU LEU LEU B B 11 11 | . 0.0996 0.0824 0.0569 -0.0093 0.0031 -  |
| 0.0045 | 1   | .   |                         |                                          |
| 3421   | CG  | CG  | . LEU LEU LEU B B 11 11 | . 0.0810 0.0898 0.0827 0.0102 -0.0074    |
| 0.0052 | 1   | .   |                         |                                          |
| 3422   | CD1 | CD1 | . LEU LEU LEU B B 11 11 | . 0.0973 0.1224 0.1098 0.0225 -0.0085 -  |
| 0.0022 | 1   | .   |                         |                                          |
| 3423   | CD2 | CD2 | . LEU LEU LEU B B 11 11 | . 0.1144 0.0693 0.1510 0.0070 -0.0139    |
| 0.0121 | 1   | .   |                         |                                          |
| 3424   | C   | C   | . LEU LEU LEU B B 11 11 | . 0.0681 0.0741 0.0767 -0.0064 -0.0037 - |
| 0.0071 | 1   | .   |                         |                                          |
| 3425   | O   | O   | . LEU LEU LEU B B 11 11 | . 0.0905 0.0810 0.0767 -0.0089 0.0066    |
| 0.0130 | 1   | .   |                         |                                          |
| 3426   | N   | N   | . ASP ASP ASP B B 12 12 | . 0.0877 0.0853 0.0634 0.0054 0.0090     |
| 0.0072 | 1   | .   |                         |                                          |
| 3427   | CA  | CA  | . ASP ASP ASP B B 12 12 | . 0.0851 0.0668 0.0737 0.0055 0.0052     |
| 0.0037 | 1   | .   |                         |                                          |
| 3428   | CB  | CB  | . ASP ASP ASP B B 12 12 | . 0.0754 0.0866 0.0673 -0.0118 0.0040    |
| 0.0291 | 1   | .   |                         |                                          |
| 3429   | CG  | CG  | . ASP ASP ASP B B 12 12 | . 0.0942 0.1380 0.1279 0.0116 -0.0140    |
| 0.0059 | 1   | .   |                         |                                          |
| 3430   | OD1 | OD1 | . ASP ASP ASP B B 12 12 | . 0.0848 0.0801 0.0801 0.0002 -0.0009 -  |
| 0.0136 | 1   | .   |                         |                                          |
| 3431   | OD2 | OD2 | . ASP ASP ASP B B 12 12 | . 0.1338 0.1131 0.1350 0.0043 0.0037     |
| 0.0166 | 1   | .   |                         |                                          |
| 3432   | C   | C   | . ASP ASP ASP B B 12 12 | . 0.0969 0.0593 0.0866 -0.0078 -0.0057   |
| 0.0013 | 1   | .   |                         |                                          |
| 3433   | O   | O   | . ASP ASP ASP B B 12 12 | . 0.0987 0.0824 0.0889 -0.0031 0.0049    |
| 0.0132 | 1   | .   |                         |                                          |
| 3434   | N   | N   | . SER SER SER B B 13 13 | . 0.0727 0.0683 0.0825 0.0007 0.0094     |
| 0.0018 | 1   | .   |                         |                                          |
| 3435   | CA  | CA  | . SER SER SER B B 13 13 | . 0.0803 0.0743 0.0837 -0.0005 0.0107 -  |
| 0.0171 | 1   | .   |                         |                                          |
| 3436   | CB  | CB  | . SER SER SER B B 13 13 | . 0.1152 0.0546 0.0493 0.0184 0.0017     |
| 0.0039 | 1   | .   |                         |                                          |
| 3437   | OG  | OG  | . SER SER SER B B 13 13 | . 0.0792 0.0767 0.0684 0.0135 -0.0009    |
| 0.0070 | 1   | .   |                         |                                          |
| 3438   | C   | C   | . SER SER SER B B 13 13 | . 0.0812 0.0865 0.0719 0.0081 -0.0130 -  |
| 0.0103 | 1   | .   |                         |                                          |
| 3439   | O   | O   | . SER SER SER B B 13 13 | . 0.0847 0.0842 0.0975 0.0075 0.0047     |
| 0.0090 | 1   | .   |                         |                                          |
| 3440   | N   | N   | . ARG ARG ARG B B 14 14 | . 0.0831 0.0734 0.1068 -0.0012 -0.0041 - |
| 0.0006 | 1   | .   |                         |                                          |
| 3441   | CA  | CA  | . ARG ARG ARG B B 14 14 | . 0.0856 0.0890 0.0812 -0.0026 -0.0086   |
| 0.0057 | 1   | .   |                         |                                          |
| 3442   | CB  | CB  | . ARG ARG ARG B B 14 14 | . 0.1250 0.0997 0.1228 0.0005 0.0170     |
| 0.0165 | 1   | .   |                         |                                          |

|        |     |     |                           |        |        |        |         |         |   |
|--------|-----|-----|---------------------------|--------|--------|--------|---------|---------|---|
| 3443   | CG  | CG  | . ARG ARG ARG B B 14 14 . | 0.1433 | 0.1319 | 0.1159 | 0.0224  | -0.0133 |   |
| 0.0036 | 1   | .   |                           |        |        |        |         |         |   |
| 3444   | CD  | CD  | . ARG ARG ARG B B 14 14 . | 0.1283 | 0.1509 | 0.1921 | -0.0131 | -0.0246 |   |
| 0.0174 | 1   | .   |                           |        |        |        |         |         |   |
| 3445   | NE  | NE  | . ARG ARG ARG B B 14 14 . | 0.1444 | 0.1575 | 0.1288 | -0.0068 | -0.0220 |   |
| 0.0141 | 1   | .   |                           |        |        |        |         |         |   |
| 3446   | CZ  | CZ  | . ARG ARG ARG B B 14 14 . | 0.1308 | 0.1130 | 0.0954 | 0.0038  | -0.0075 |   |
| 0.0295 | 1   | .   |                           |        |        |        |         |         |   |
| 3447   | NH1 | NH1 | . ARG ARG ARG B B 14 14 . | 0.1835 | 0.1051 | 0.1270 | 0.0236  | -0.0031 | - |
| 0.0004 | 1   | .   |                           |        |        |        |         |         |   |
| 3448   | NH2 | NH2 | . ARG ARG ARG B B 14 14 . | 0.1400 | 0.1425 | 0.1590 | -0.0025 | -0.0044 | - |
| 0.0049 | 1   | .   |                           |        |        |        |         |         |   |
| 3449   | C   | C   | . ARG ARG ARG B B 14 14 . | 0.0806 | 0.1006 | 0.0933 | -0.0032 | 0.0006  | - |
| 0.0074 | 1   | .   |                           |        |        |        |         |         |   |
| 3450   | O   | O   | . ARG ARG ARG B B 14 14 . | 0.1195 | 0.1257 | 0.1017 | -0.0194 | 0.0134  | - |
| 0.0121 | 1   | .   |                           |        |        |        |         |         |   |
| 3451   | N   | N   | . GLY GLY GLY B B 15 15 . | 0.0752 | 0.0919 | 0.0645 | 0.0149  | 0.0001  | - |
| 0.0006 | 1   | .   |                           |        |        |        |         |         |   |
| 3452   | CA  | CA  | . GLY GLY GLY B B 15 15 . | 0.0745 | 0.0850 | 0.0829 | 0.0196  | 0.0142  | - |
| 0.0023 | 1   | .   |                           |        |        |        |         |         |   |
| 3453   | C   | C   | . GLY GLY GLY B B 15 15 . | 0.1068 | 0.0925 | 0.1041 | 0.0112  | -0.0032 | - |
| 0.0062 | 1   | .   |                           |        |        |        |         |         |   |
| 3454   | O   | O   | . GLY GLY GLY B B 15 15 . | 0.1015 | 0.1012 | 0.0962 | 0.0063  | 0.0010  | - |
| 0.0133 | 1   | .   |                           |        |        |        |         |         |   |
| 3455   | N   | N   | . ASN ASN ASN B B 16 16 . | 0.1017 | 0.0811 | 0.1065 | 0.0213  | -0.0087 |   |
| 0.0074 | 1   | .   |                           |        |        |        |         |         |   |
| 3456   | CA  | CA  | . ASN ASN ASN B B 16 16 . | 0.1062 | 0.0745 | 0.0962 | 0.0214  | 0.0008  | - |
| 0.0061 | 1   | .   |                           |        |        |        |         |         |   |
| 3457   | CB  | CB  | . ASN ASN ASN B B 16 16 . | 0.1212 | 0.1014 | 0.1146 | 0.0084  | 0.0127  |   |
| 0.0259 | 1   | .   |                           |        |        |        |         |         |   |
| 3458   | CG  | CG  | . ASN ASN ASN B B 16 16 . | 0.1348 | 0.0982 | 0.1151 | 0.0268  | 0.0022  | - |
| 0.0004 | 1   | .   |                           |        |        |        |         |         |   |
| 3459   | OD1 | OD1 | . ASN ASN ASN B B 16 16 . | 0.1369 | 0.1490 | 0.1519 | -0.0118 | -0.0114 |   |
| 0.0088 | 1   | .   |                           |        |        |        |         |         |   |
| 3460   | ND2 | ND2 | . ASN ASN ASN B B 16 16 . | 0.1616 | 0.1218 | 0.1388 | 0.0155  | 0.0284  |   |
| 0.0293 | 1   | .   |                           |        |        |        |         |         |   |
| 3461   | C   | C   | . ASN ASN ASN B B 16 16 . | 0.0818 | 0.0939 | 0.1129 | 0.0226  | -0.0164 | - |
| 0.0124 | 1   | .   |                           |        |        |        |         |         |   |
| 3462   | O   | O   | . ASN ASN ASN B B 16 16 . | 0.1050 | 0.0997 | 0.1224 | 0.0100  | 0.0023  | - |
| 0.0023 | 1   | .   |                           |        |        |        |         |         |   |
| 3463   | N   | N   | . PRO PRO PRO B B 17 17 . | 0.0939 | 0.0822 | 0.0889 | -0.0059 | 0.0057  | - |
| 0.0188 | 1   | .   |                           |        |        |        |         |         |   |
| 3464   | CA  | CA  | . PRO PRO PRO B B 17 17 . | 0.0558 | 0.0847 | 0.0688 | 0.0073  | -0.0006 | - |
| 0.0175 | 1   | .   |                           |        |        |        |         |         |   |
| 3465   | CB  | CB  | . PRO PRO PRO B B 17 17 . | 0.1193 | 0.1001 | 0.0888 | 0.0118  | -0.0335 | - |
| 0.0399 | 1   | .   |                           |        |        |        |         |         |   |
| 3466   | CG  | CG  | . PRO PRO PRO B B 17 17 . | 0.0765 | 0.1260 | 0.0948 | -0.0012 | -0.0041 | - |
| 0.0190 | 1   | .   |                           |        |        |        |         |         |   |
| 3467   | CD  | CD  | . PRO PRO PRO B B 17 17 . | 0.0992 | 0.0906 | 0.1051 | 0.0030  | 0.0029  | - |
| 0.0383 | 1   | .   |                           |        |        |        |         |         |   |
| 3468   | C   | C   | . PRO PRO PRO B B 17 17 . | 0.0670 | 0.0823 | 0.0859 | 0.0074  | 0.0021  |   |
| 0.0014 | 1   | .   |                           |        |        |        |         |         |   |
| 3469   | O   | O   | . PRO PRO PRO B B 17 17 . | 0.1040 | 0.0809 | 0.1011 | 0.0043  | 0.0041  |   |
| 0.0051 | 1   | .   |                           |        |        |        |         |         |   |
| 3470   | N   | N   | . THR THR THR B B 18 18 . | 0.0967 | 0.0895 | 0.0942 | 0.0067  | -0.0060 | - |
| 0.0064 | 1   | .   |                           |        |        |        |         |         |   |
| 3471   | CA  | CA  | . THR THR THR B B 18 18 . | 0.0901 | 0.1007 | 0.0685 | 0.0049  | 0.0099  | - |
| 0.0023 | 1   | .   |                           |        |        |        |         |         |   |
| 3472   | CB  | CB  | . THR THR THR B B 18 18 . | 0.1135 | 0.0937 | 0.0794 | 0.0318  | -0.0083 | - |
| 0.0161 | 1   | .   |                           |        |        |        |         |         |   |

|        |     |     |                         |                                         |
|--------|-----|-----|-------------------------|-----------------------------------------|
| 3473   | OG1 | OG1 | . THR THR THR B B 18 18 | . 0.1134 0.1178 0.1044 -0.0064 -0.0090  |
| 0.0166 | 1   | .   |                         |                                         |
| 3474   | CG2 | CG2 | . THR THR THR B B 18 18 | . 0.1270 0.0921 0.1346 0.0174 -0.0146   |
| 0.0240 | 1   | .   |                         |                                         |
| 3475   | C   | C   | . THR THR THR B B 18 18 | . 0.0688 0.0762 0.0852 0.0050 0.0017    |
| 0.0089 | 1   | .   |                         |                                         |
| 3476   | O   | O   | . THR THR THR B B 18 18 | . 0.1034 0.1045 0.0862 0.0210 -0.0021   |
| 0.0008 | 1   | .   |                         |                                         |
| 3477   | N   | N   | . VAL VAL VAL B B 19 19 | . 0.0860 0.0889 0.0900 0.0011 0.0000 -  |
| 0.0004 | 1   | .   |                         |                                         |
| 3478   | CA  | CA  | . VAL VAL VAL B B 19 19 | . 0.0958 0.0878 0.0921 -0.0034 0.0087   |
| 0.0160 | 1   | .   |                         |                                         |
| 3479   | CB  | CB  | . VAL VAL VAL B B 19 19 | . 0.1007 0.1014 0.1273 -0.0020 -0.0044  |
| 0.0107 | 1   | .   |                         |                                         |
| 3480   | CG1 | CG1 | . VAL VAL VAL B B 19 19 | . 0.1055 0.1713 0.1887 0.0048 -0.0048   |
| 0.0344 | 1   | .   |                         |                                         |
| 3481   | CG2 | CG2 | . VAL VAL VAL B B 19 19 | . 0.1509 0.1034 0.1260 0.0547 0.0299 -  |
| 0.0094 | 1   | .   |                         |                                         |
| 3482   | C   | C   | . VAL VAL VAL B B 19 19 | . 0.1224 0.1150 0.0877 0.0002 0.0020 -  |
| 0.0121 | 1   | .   |                         |                                         |
| 3483   | O   | O   | . VAL VAL VAL B B 19 19 | . 0.0952 0.1098 0.1075 0.0135 0.0152 -  |
| 0.0128 | 1   | .   |                         |                                         |
| 3484   | N   | N   | . GLU GLU GLU B B 20 20 | . 0.0819 0.0974 0.0978 -0.0076 -0.0144  |
| 0.0161 | 1   | .   |                         |                                         |
| 3485   | CA  | CA  | . GLU GLU GLU B B 20 20 | . 0.0926 0.1005 0.1118 0.0079 -0.0089   |
| 0.0138 | 1   | .   |                         |                                         |
| 3486   | CB  | CB  | . GLU GLU GLU B B 20 20 | . 0.0958 0.1034 0.1393 0.0012 -0.0040   |
| 0.0056 | 1   | .   |                         |                                         |
| 3487   | CG  | CG  | . GLU GLU GLU B B 20 20 | . 0.1022 0.1219 0.1639 0.0006 -0.0061   |
| 0.0251 | 1   | .   |                         |                                         |
| 3488   | CD  | CD  | . GLU GLU GLU B B 20 20 | . 0.1374 0.1570 0.1283 0.0469 0.0146    |
| 0.0100 | 1   | .   |                         |                                         |
| 3489   | OE1 | OE1 | . GLU GLU GLU B B 20 20 | . 0.1189 0.1539 0.1610 0.0037 0.0253    |
| 0.0135 | 1   | .   |                         |                                         |
| 3490   | OE2 | OE2 | . GLU GLU GLU B B 20 20 | . 0.1281 0.1439 0.1576 0.0122 -0.0054   |
| 0.0177 | 1   | .   |                         |                                         |
| 3491   | C   | C   | . GLU GLU GLU B B 20 20 | . 0.0992 0.1134 0.1031 -0.0009 0.0125 - |
| 0.0131 | 1   | .   |                         |                                         |
| 3492   | O   | O   | . GLU GLU GLU B B 20 20 | . 0.1066 0.1270 0.1335 0.0041 0.0103    |
| 0.0000 | 1   | .   |                         |                                         |
| 3493   | N   | N   | . VAL VAL VAL B B 21 21 | . 0.0821 0.0972 0.1040 -0.0023 0.0158   |
| 0.0150 | 1   | .   |                         |                                         |
| 3494   | CA  | CA  | . VAL VAL VAL B B 21 21 | . 0.0783 0.0960 0.1180 0.0061 0.0056    |
| 0.0116 | 1   | .   |                         |                                         |
| 3495   | CB  | CB  | . VAL VAL VAL B B 21 21 | . 0.0736 0.1084 0.1036 -0.0059 0.0004   |
| 0.0017 | 1   | .   |                         |                                         |
| 3496   | CG1 | CG1 | . VAL VAL VAL B B 21 21 | . 0.0860 0.1561 0.1511 0.0019 0.0439    |
| 0.0191 | 1   | .   |                         |                                         |
| 3497   | CG2 | CG2 | . VAL VAL VAL B B 21 21 | . 0.1380 0.1323 0.1455 -0.0138 0.0304   |
| 0.0156 | 1   | .   |                         |                                         |
| 3498   | C   | C   | . VAL VAL VAL B B 21 21 | . 0.0837 0.1106 0.1101 -0.0077 0.0039   |
| 0.0026 | 1   | .   |                         |                                         |
| 3499   | O   | O   | . VAL VAL VAL B B 21 21 | . 0.0943 0.1263 0.1245 -0.0095 0.0082   |
| 0.0093 | 1   | .   |                         |                                         |
| 3500   | N   | N   | . ASP ASP ASP B B 22 22 | . 0.1140 0.1386 0.1112 0.0117 0.0100    |
| 0.0102 | 1   | .   |                         |                                         |
| 3501   | CA  | CA  | . ASP ASP ASP B B 22 22 | . 0.0892 0.1458 0.1386 -0.0059 0.0054   |
| 0.0007 | 1   | .   |                         |                                         |
| 3502   | CB  | CB  | . ASP ASP ASP B B 22 22 | . 0.0958 0.1561 0.1417 -0.0217 0.0042   |
| 0.0129 | 1   | .   |                         |                                         |

|        |     |     |                         |                                         |
|--------|-----|-----|-------------------------|-----------------------------------------|
| 3503   | CG  | CG  | . ASP ASP ASP B B 22 22 | . 0.1457 0.1788 0.1760 -0.0059 0.0020   |
| 0.0186 | 1   | .   |                         |                                         |
| 3504   | OD1 | OD1 | . ASP ASP ASP B B 22 22 | . 0.1932 0.1977 0.2142 -0.0064 -0.0072  |
| 0.0198 | 1   | .   |                         |                                         |
| 3505   | OD2 | OD2 | . ASP ASP ASP B B 22 22 | . 0.1465 0.2063 0.1722 0.0322 -0.0182   |
| 0.0267 | 1   | .   |                         |                                         |
| 3506   | C   | C   | . ASP ASP ASP B B 22 22 | . 0.1039 0.1105 0.1349 0.0169 -0.0053   |
| 0.0086 | 1   | .   |                         |                                         |
| 3507   | O   | O   | . ASP ASP ASP B B 22 22 | . 0.1250 0.1381 0.1605 0.0161 0.0048    |
| 0.0023 | 1   | .   |                         |                                         |
| 3508   | N   | N   | . LEU LEU LEU B B 23 23 | . 0.0834 0.1056 0.1360 0.0006 -0.0125   |
| 0.0167 | 1   | .   |                         |                                         |
| 3509   | CA  | CA  | . LEU LEU LEU B B 23 23 | . 0.0791 0.1247 0.1301 -0.0086 -0.0090  |
| 0.0326 | 1   | .   |                         |                                         |
| 3510   | CB  | CB  | . LEU LEU LEU B B 23 23 | . 0.0981 0.1222 0.1082 0.0114 -0.0260   |
| 0.0279 | 1   | .   |                         |                                         |
| 3511   | CG  | CG  | . LEU LEU LEU B B 23 23 | . 0.0883 0.1569 0.1431 0.0166 -0.0095   |
| 0.0351 | 1   | .   |                         |                                         |
| 3512   | CD1 | CD1 | . LEU LEU LEU B B 23 23 | . 0.0872 0.2407 0.1719 -0.0075 0.0226   |
| 0.0372 | 1   | .   |                         |                                         |
| 3513   | CD2 | CD2 | . LEU LEU LEU B B 23 23 | . 0.1570 0.1395 0.1558 0.0071 0.0007    |
| 0.0235 | 1   | .   |                         |                                         |
| 3514   | C   | C   | . LEU LEU LEU B B 23 23 | . 0.1101 0.1288 0.1384 0.0021 0.0100    |
| 0.0024 | 1   | .   |                         |                                         |
| 3515   | O   | O   | . LEU LEU LEU B B 23 23 | . 0.1113 0.1260 0.1594 -0.0061 0.0091   |
| 0.0056 | 1   | .   |                         |                                         |
| 3516   | N   | N   | . TYR TYR TYR B B 24 24 | . 0.1178 0.1666 0.1461 -0.0106 0.0186   |
| 0.0178 | 1   | .   |                         |                                         |
| 3517   | CA  | CA  | . TYR TYR TYR B B 24 24 | . 0.1265 0.1695 0.1405 -0.0138 0.0036   |
| 0.0147 | 1   | .   |                         |                                         |
| 3518   | CB  | CB  | . TYR TYR TYR B B 24 24 | . 0.1385 0.1972 0.1433 0.0034 0.0163    |
| 0.0197 | 1   | .   |                         |                                         |
| 3519   | CG  | CG  | . TYR TYR TYR B B 24 24 | . 0.1723 0.2045 0.1780 0.0103 0.0118    |
| 0.0147 | 1   | .   |                         |                                         |
| 3520   | CD1 | CD1 | . TYR TYR TYR B B 24 24 | . 0.1780 0.2495 0.1775 0.0018 0.0049 -  |
| 0.0066 | 1   | .   |                         |                                         |
| 3521   | CE1 | CE1 | . TYR TYR TYR B B 24 24 | . 0.1650 0.2597 0.2624 -0.0326 -0.0147  |
| 0.0219 | 1   | .   |                         |                                         |
| 3522   | CZ  | CZ  | . TYR TYR TYR B B 24 24 | . 0.1735 0.2837 0.2573 -0.0097 -0.0385  |
| 0.0686 | 1   | .   |                         |                                         |
| 3523   | OH  | OH  | . TYR TYR TYR B B 24 24 | . 0.1910 0.3314 0.2871 -0.0332 -0.0460  |
| 0.0891 | 1   | .   |                         |                                         |
| 3524   | CE2 | CE2 | . TYR TYR TYR B B 24 24 | . 0.2106 0.2832 0.2523 0.0061 -0.0225   |
| 0.0484 | 1   | .   |                         |                                         |
| 3525   | CD2 | CD2 | . TYR TYR TYR B B 24 24 | . 0.1773 0.2389 0.2525 0.0048 0.0005    |
| 0.0766 | 1   | .   |                         |                                         |
| 3526   | C   | C   | . TYR TYR TYR B B 24 24 | . 0.1348 0.1699 0.1459 0.0027 0.0115    |
| 0.0112 | 1   | .   |                         |                                         |
| 3527   | O   | O   | . TYR TYR TYR B B 24 24 | . 0.1214 0.1770 0.1961 -0.0010 0.0153 - |
| 0.0007 | 1   | .   |                         |                                         |
| 3528   | N   | N   | . THR THR THR B B 25 25 | . 0.1185 0.1873 0.1481 -0.0041 0.0038   |
| 0.0094 | 1   | .   |                         |                                         |
| 3529   | CA  | CA  | . THR THR THR B B 25 25 | . 0.1386 0.1984 0.1797 -0.0305 0.0132 - |
| 0.0079 | 1   | .   |                         |                                         |
| 3530   | CB  | CB  | . THR THR THR B B 25 25 | . 0.1337 0.1756 0.1876 -0.0217 0.0172 - |
| 0.0008 | 1   | .   |                         |                                         |
| 3531   | OG1 | OG1 | . THR THR THR B B 25 25 | . 0.1556 0.1840 0.2050 0.0028 0.0172    |
| 0.0193 | 1   | .   |                         |                                         |
| 3532   | CG2 | CG2 | . THR THR THR B B 25 25 | . 0.2030 0.1697 0.1987 -0.0299 0.0200   |
| 0.0158 | 1   | .   |                         |                                         |

|        |     |     |                           |        |        |        |         |         |
|--------|-----|-----|---------------------------|--------|--------|--------|---------|---------|
| 3533   | C   | C   | . THR THR THR B B 25 25 . | 0.1703 | 0.1908 | 0.1791 | -0.0026 | -0.0011 |
| 0.0056 | 1   | .   |                           |        |        |        |         |         |
| 3534   | O   | O   | . THR THR THR B B 25 25 . | 0.1628 | 0.2223 | 0.1990 | -0.0188 | 0.0169  |
| 0.0052 | 1   | .   |                           |        |        |        |         |         |
| 3535   | N   | N   | . ALA ALA ALA B B 26 26 . | 0.1587 | 0.2020 | 0.2199 | -0.0235 | 0.0190  |
| 0.0017 | 1   | .   |                           |        |        |        |         |         |
| 3536   | CA  | CA  | . ALA ALA ALA B B 26 26 . | 0.1849 | 0.2344 | 0.2720 | -0.0302 | 0.0054  |
| 0.0240 | 1   | .   |                           |        |        |        |         |         |
| 3537   | CB  | CB  | . ALA ALA ALA B B 26 26 . | 0.1712 | 0.2791 | 0.2993 | -0.0342 | -0.0075 |
| 0.0189 | 1   | .   |                           |        |        |        |         |         |
| 3538   | C   | C   | . ALA ALA ALA B B 26 26 . | 0.1914 | 0.2309 | 0.2686 | -0.0225 | -0.0008 |
| 0.0314 | 1   | .   |                           |        |        |        |         |         |
| 3539   | O   | O   | . ALA ALA ALA B B 26 26 . | 0.2161 | 0.2473 | 0.3229 | -0.0547 | 0.0168  |
| 0.0626 | 1   | .   |                           |        |        |        |         |         |
| 3540   | N   | N   | . LYS LYS LYS B B 27 27 . | 0.2006 | 0.2347 | 0.2669 | -0.0393 | 0.0000  |
| 0.0255 | 1   | .   |                           |        |        |        |         |         |
| 3541   | CA  | CA  | . LYS LYS LYS B B 27 27 . | 0.2401 | 0.2283 | 0.2843 | -0.0217 | -0.0050 |
| 0.0160 | 1   | .   |                           |        |        |        |         |         |
| 3542   | CB  | CB  | . LYS LYS LYS B B 27 27 . | 0.2686 | 0.2432 | 0.2959 | -0.0303 | -0.0110 |
| 0.0150 | 1   | .   |                           |        |        |        |         |         |
| 3543   | CG  | CG  | . LYS LYS LYS B B 27 27 . | 0.2909 | 0.2942 | 0.3295 | 0.0024  | -0.0414 |
| 0.0211 | 1   | .   |                           |        |        |        |         |         |
| 3544   | CD  | CD  | . LYS LYS LYS B B 27 27 . | 0.3179 | 0.3392 | 0.3666 | -0.0441 | -0.0671 |
| 0.0288 | 1   | .   |                           |        |        |        |         |         |
| 3545   | CE  | CE  | . LYS LYS LYS B B 27 27 . | 0.2775 | 0.3405 | 0.3639 | -0.0256 | -0.0407 |
| 0.0773 | 1   | .   |                           |        |        |        |         |         |
| 3546   | NZ  | NZ  | . LYS LYS LYS B B 27 27 . | 0.3005 | 0.5307 | 0.4145 | -0.0556 | -0.0361 |
| 0.0882 | 1   | .   |                           |        |        |        |         |         |
| 3547   | C   | C   | . LYS LYS LYS B B 27 27 . | 0.2286 | 0.2280 | 0.2756 | -0.0071 | 0.0045  |
| 0.0153 | 1   | .   |                           |        |        |        |         |         |
| 3548   | O   | O   | . LYS LYS LYS B B 27 27 . | 0.2443 | 0.2581 | 0.3397 | 0.0216  | -0.0133 |
| 0.0125 | 1   | .   |                           |        |        |        |         |         |
| 3549   | N   | N   | . GLY GLY GLY B B 28 28 . | 0.1891 | 0.2045 | 0.2448 | -0.0354 | -0.0131 |
| 0.0253 | 1   | .   |                           |        |        |        |         |         |
| 3550   | CA  | CA  | . GLY GLY GLY B B 28 28 . | 0.1866 | 0.1987 | 0.2367 | -0.0468 | 0.0068  |
| 0.0218 | 1   | .   |                           |        |        |        |         |         |
| 3551   | C   | C   | . GLY GLY GLY B B 28 28 . | 0.1803 | 0.1811 | 0.2200 | -0.0217 | 0.0116  |
| 0.0415 | 1   | .   |                           |        |        |        |         |         |
| 3552   | O   | O   | . GLY GLY GLY B B 28 28 . | 0.1281 | 0.1868 | 0.2090 | -0.0003 | 0.0129  |
| 0.0176 | 1   | .   |                           |        |        |        |         |         |
| 3553   | N   | N   | . LEU LEU LEU B B 29 29 . | 0.1572 | 0.1834 | 0.2476 | -0.0059 | -0.0004 |
| 0.0251 | 1   | .   |                           |        |        |        |         |         |
| 3554   | CA  | CA  | . LEU LEU LEU B B 29 29 . | 0.1770 | 0.1830 | 0.1939 | -0.0091 | -0.0016 |
| 0.0090 | 1   | .   |                           |        |        |        |         |         |
| 3555   | CB  | CB  | . LEU LEU LEU B B 29 29 . | 0.1758 | 0.1915 | 0.2025 | 0.0013  | -0.0180 |
| 0.0117 | 1   | .   |                           |        |        |        |         |         |
| 3556   | CG  | CG  | . LEU LEU LEU B B 29 29 . | 0.2222 | 0.2624 | 0.2802 | -0.0360 | -0.0786 |
| 0.0138 | 1   | .   |                           |        |        |        |         |         |
| 3557   | CD1 | CD1 | . LEU LEU LEU B B 29 29 . | 0.2771 | 0.3056 | 0.3105 | -0.0510 | -0.1160 |
| 0.0133 | 1   | .   |                           |        |        |        |         |         |
| 3558   | CD2 | CD2 | . LEU LEU LEU B B 29 29 . | 0.2772 | 0.3414 | 0.3439 | -0.0311 | -0.0961 |
| 0.0588 | 1   | .   |                           |        |        |        |         |         |
| 3559   | C   | C   | . LEU LEU LEU B B 29 29 . | 0.1648 | 0.1743 | 0.2105 | -0.0009 | 0.0043  |
| 0.0043 | 1   | .   |                           |        |        |        |         |         |
| 3560   | O   | O   | . LEU LEU LEU B B 29 29 . | 0.1747 | 0.1636 | 0.2274 | 0.0013  | 0.0078  |
| 0.0101 | 1   | .   |                           |        |        |        |         |         |
| 3561   | N   | N   | . PHE PHE PHE B B 30 30 . | 0.1202 | 0.1479 | 0.1595 | 0.0009  | -0.0003 |
| 0.0169 | 1   | .   |                           |        |        |        |         |         |
| 3562   | CA  | CA  | . PHE PHE PHE B B 30 30 . | 0.1165 | 0.1427 | 0.1485 | 0.0033  | -0.0004 |
| 0.0008 | 1   | .   |                           |        |        |        |         |         |

|        |     |     |                         |                                          |
|--------|-----|-----|-------------------------|------------------------------------------|
| 3563   | CB  | CB  | . PHE PHE PHE B B 30 30 | . 0.1613 0.1537 0.1605 -0.0116 -0.0229   |
| 0.0117 | 1   | .   |                         |                                          |
| 3564   | CG  | CG  | . PHE PHE PHE B B 30 30 | . 0.1208 0.1478 0.1427 -0.0217 0.0139 -  |
| 0.0144 | 1   | .   |                         |                                          |
| 3565   | CD1 | CD1 | . PHE PHE PHE B B 30 30 | . 0.1626 0.1087 0.1792 -0.0176 0.0128 -  |
| 0.0342 | 1   | .   |                         |                                          |
| 3566   | CE1 | CE1 | . PHE PHE PHE B B 30 30 | . 0.1574 0.1459 0.2125 -0.0393 0.0007    |
| 0.0283 | 1   | .   |                         |                                          |
| 3567   | CZ  | CZ  | . PHE PHE PHE B B 30 30 | . 0.1413 0.1620 0.1956 -0.0345 0.0009 -  |
| 0.0106 | 1   | .   |                         |                                          |
| 3568   | CE2 | CE2 | . PHE PHE PHE B B 30 30 | . 0.1604 0.1453 0.1580 -0.0245 -0.0121 - |
| 0.0152 | 1   | .   |                         |                                          |
| 3569   | CD2 | CD2 | . PHE PHE PHE B B 30 30 | . 0.1393 0.1537 0.1178 -0.0136 0.0066    |
| 0.0014 | 1   | .   |                         |                                          |
| 3570   | C   | C   | . PHE PHE PHE B B 30 30 | . 0.1232 0.1396 0.1680 0.0007 -0.0055 -  |
| 0.0123 | 1   | .   |                         |                                          |
| 3571   | O   | O   | . PHE PHE PHE B B 30 30 | . 0.1243 0.1897 0.2394 -0.0071 0.0225 -  |
| 0.0072 | 1   | .   |                         |                                          |
| 3572   | N   | N   | . ARG ARG ARG B B 31 31 | . 0.0896 0.1302 0.1426 0.0060 0.0046 -   |
| 0.0031 | 1   | .   |                         |                                          |
| 3573   | CA  | CA  | . ARG ARG ARG B B 31 31 | . 0.1093 0.1199 0.1347 -0.0048 -0.0039   |
| 0.0166 | 1   | .   |                         |                                          |
| 3574   | CB  | CB  | . ARG ARG ARG B B 31 31 | . 0.1044 0.1190 0.1328 0.0028 -0.0038    |
| 0.0161 | 1   | .   |                         |                                          |
| 3575   | CG  | CG  | . ARG ARG ARG B B 31 31 | . 0.1378 0.1199 0.1475 -0.0332 -0.0387   |
| 0.0378 | 1   | .   |                         |                                          |
| 3576   | CD  | CD  | . ARG ARG ARG B B 31 31 | . 0.1304 0.1339 0.2020 -0.0083 -0.0015   |
| 0.0232 | 1   | .   |                         |                                          |
| 3577   | NE  | NE  | . ARG ARG ARG B B 31 31 | . 0.1210 0.1298 0.1850 -0.0189 -0.0366   |
| 0.0413 | 1   | .   |                         |                                          |
| 3578   | CZ  | CZ  | . ARG ARG ARG B B 31 31 | . 0.1674 0.1816 0.1877 -0.0196 -0.0356   |
| 0.0185 | 1   | .   |                         |                                          |
| 3579   | NH1 | NH1 | . ARG ARG ARG B B 31 31 | . 0.1869 0.2829 0.1805 -0.1023 -0.0197   |
| 0.0038 | 1   | .   |                         |                                          |
| 3580   | NH2 | NH2 | . ARG ARG ARG B B 31 31 | . 0.2085 0.2083 0.2682 -0.0079 -0.0144 - |
| 0.0068 | 1   | .   |                         |                                          |
| 3581   | C   | C   | . ARG ARG ARG B B 31 31 | . 0.1137 0.1146 0.1263 0.0015 0.0011     |
| 0.0079 | 1   | .   |                         |                                          |
| 3582   | O   | O   | . ARG ARG ARG B B 31 31 | . 0.1429 0.1295 0.1405 -0.0080 0.0162    |
| 0.0139 | 1   | .   |                         |                                          |
| 3583   | N   | N   | . ALA ALA ALA B B 32 32 | . 0.0956 0.0882 0.1059 0.0084 0.0088     |
| 0.0281 | 1   | .   |                         |                                          |
| 3584   | CA  | CA  | . ALA ALA ALA B B 32 32 | . 0.0872 0.0987 0.1117 0.0085 0.0000     |
| 0.0050 | 1   | .   |                         |                                          |
| 3585   | CB  | CB  | . ALA ALA ALA B B 32 32 | . 0.0815 0.1295 0.1029 -0.0048 -0.0263   |
| 0.0383 | 1   | .   |                         |                                          |
| 3586   | C   | C   | . ALA ALA ALA B B 32 32 | . 0.0804 0.1000 0.1137 0.0109 -0.0054    |
| 0.0225 | 1   | .   |                         |                                          |
| 3587   | O   | O   | . ALA ALA ALA B B 32 32 | . 0.1219 0.1039 0.1117 -0.0137 0.0183    |
| 0.0003 | 1   | .   |                         |                                          |
| 3588   | N   | N   | . ALA ALA ALA B B 33 33 | . 0.0981 0.1063 0.1220 0.0102 0.0214     |
| 0.0147 | 1   | .   |                         |                                          |
| 3589   | CA  | CA  | . ALA ALA ALA B B 33 33 | . 0.1110 0.0973 0.1012 0.0112 0.0083     |
| 0.0154 | 1   | .   |                         |                                          |
| 3590   | CB  | CB  | . ALA ALA ALA B B 33 33 | . 0.0888 0.1415 0.1110 -0.0019 -0.0116   |
| 0.0129 | 1   | .   |                         |                                          |
| 3591   | C   | C   | . ALA ALA ALA B B 33 33 | . 0.0765 0.0864 0.0872 -0.0055 0.0137 -  |
| 0.0060 | 1   | .   |                         |                                          |
| 3592   | O   | O   | . ALA ALA ALA B B 33 33 | . 0.1216 0.1274 0.1113 -0.0156 0.0206 -  |
| 0.0088 | 1   | .   |                         |                                          |





|        |     |     |                           |        |        |        |         |         |   |
|--------|-----|-----|---------------------------|--------|--------|--------|---------|---------|---|
| 3623   | CA  | CA  | . SER SER SER B B 39 39 . | 0.1155 | 0.1099 | 0.0714 | 0.0162  | -0.0055 |   |
| 0.0020 | 1   | .   |                           |        |        |        |         |         |   |
| 3624   | CB  | CB  | . SER SER SER B B 39 39 . | 0.1221 | 0.0905 | 0.0879 | -0.0022 | 0.0152  | - |
| 0.0135 | 1   | .   |                           |        |        |        |         |         |   |
| 3625   | OG  | OG  | . SER SER SER B B 39 39 . | 0.1189 | 0.0691 | 0.0950 | -0.0157 | -0.0212 |   |
| 0.0119 | 1   | .   |                           |        |        |        |         |         |   |
| 3626   | C   | C   | . SER SER SER B B 39 39 . | 0.0881 | 0.0650 | 0.0955 | 0.0006  | 0.0085  |   |
| 0.0005 | 1   | .   |                           |        |        |        |         |         |   |
| 3627   | O   | O   | . SER SER SER B B 39 39 . | 0.1069 | 0.0845 | 0.0772 | 0.0038  | 0.0062  | - |
| 0.0001 | 1   | .   |                           |        |        |        |         |         |   |
| 3628   | N   | N   | . THR THR THR B B 40 40 . | 0.1232 | 0.0873 | 0.0952 | 0.0192  | 0.0064  | - |
| 0.0045 | 1   | .   |                           |        |        |        |         |         |   |
| 3629   | CA  | CA  | . THR THR THR B B 40 40 . | 0.1051 | 0.0937 | 0.0867 | 0.0133  | 0.0180  |   |
| 0.0009 | 1   | .   |                           |        |        |        |         |         |   |
| 3630   | CB  | CB  | . THR THR THR B B 40 40 . | 0.1211 | 0.0844 | 0.1161 | -0.0045 | 0.0254  |   |
| 0.0041 | 1   | .   |                           |        |        |        |         |         |   |
| 3631   | OG1 | OG1 | . THR THR THR B B 40 40 . | 0.1549 | 0.1400 | 0.1288 | -0.0210 | 0.0099  | - |
| 0.0094 | 1   | .   |                           |        |        |        |         |         |   |
| 3632   | CG2 | CG2 | . THR THR THR B B 40 40 . | 0.1325 | 0.0933 | 0.1116 | -0.0148 | 0.0241  |   |
| 0.0411 | 1   | .   |                           |        |        |        |         |         |   |
| 3633   | C   | C   | . THR THR THR B B 40 40 . | 0.0832 | 0.0731 | 0.0896 | -0.0106 | 0.0003  | - |
| 0.0122 | 1   | .   |                           |        |        |        |         |         |   |
| 3634   | O   | O   | . THR THR THR B B 40 40 . | 0.1477 | 0.0927 | 0.1241 | -0.0178 | -0.0083 | - |
| 0.0028 | 1   | .   |                           |        |        |        |         |         |   |
| 3635   | N   | N   | . GLY GLY GLY B B 41 41 . | 0.0968 | 0.0966 | 0.0845 | 0.0168  | -0.0049 |   |
| 0.0056 | 1   | .   |                           |        |        |        |         |         |   |
| 3636   | CA  | CA  | . GLY GLY GLY B B 41 41 . | 0.1179 | 0.0889 | 0.0776 | 0.0211  | 0.0036  |   |
| 0.0034 | 1   | .   |                           |        |        |        |         |         |   |
| 3637   | C   | C   | . GLY GLY GLY B B 41 41 . | 0.1137 | 0.0777 | 0.0970 | 0.0068  | 0.0093  |   |
| 0.0000 | 1   | .   |                           |        |        |        |         |         |   |
| 3638   | O   | O   | . GLY GLY GLY B B 41 41 . | 0.1133 | 0.0948 | 0.1242 | 0.0147  | -0.0030 |   |
| 0.0094 | 1   | .   |                           |        |        |        |         |         |   |
| 3639   | N   | N   | . ILE ILE ILE B B 42 42 . | 0.1161 | 0.0854 | 0.0968 | 0.0016  | 0.0015  | - |
| 0.0014 | 1   | .   |                           |        |        |        |         |         |   |
| 3640   | CA  | CA  | . ILE ILE ILE B B 42 42 . | 0.1216 | 0.1007 | 0.1124 | 0.0109  | -0.0013 | - |
| 0.0016 | 1   | .   |                           |        |        |        |         |         |   |
| 3641   | CB  | CB  | . ILE ILE ILE B B 42 42 . | 0.1268 | 0.1153 | 0.1129 | -0.0171 | 0.0092  | - |
| 0.0010 | 1   | .   |                           |        |        |        |         |         |   |
| 3642   | CG1 | CG1 | . ILE ILE ILE B B 42 42 . | 0.1390 | 0.0814 | 0.1210 | -0.0043 | -0.0096 |   |
| 0.0334 | 1   | .   |                           |        |        |        |         |         |   |
| 3643   | CD  | CD  | . ILE ILE ILE B B 42 42 . | 0.2720 | 0.2007 | 0.1609 | -0.0128 | -0.0063 |   |
| 0.1077 | 1   | .   |                           |        |        |        |         |         |   |
| 3644   | CG2 | CG2 | . ILE ILE ILE B B 42 42 . | 0.1225 | 0.1384 | 0.1745 | -0.0028 | 0.0151  |   |
| 0.0262 | 1   | .   |                           |        |        |        |         |         |   |
| 3645   | C   | C   | . ILE ILE ILE B B 42 42 . | 0.1080 | 0.1121 | 0.1029 | 0.0037  | 0.0112  | - |
| 0.0005 | 1   | .   |                           |        |        |        |         |         |   |
| 3646   | O   | O   | . ILE ILE ILE B B 42 42 . | 0.1300 | 0.1078 | 0.1397 | 0.0145  | 0.0040  | - |
| 0.0380 | 1   | .   |                           |        |        |        |         |         |   |
| 3647   | N   | N   | . TYR TYR TYR B B 43 43 . | 0.1043 | 0.1081 | 0.0975 | 0.0033  | -0.0122 |   |
| 0.0064 | 1   | .   |                           |        |        |        |         |         |   |
| 3648   | CA  | CA  | . TYR TYR TYR B B 43 43 . | 0.0894 | 0.0984 | 0.0858 | -0.0093 | 0.0016  |   |
| 0.0017 | 1   | .   |                           |        |        |        |         |         |   |
| 3649   | CB  | CB  | . TYR TYR TYR B B 43 43 . | 0.0903 | 0.0978 | 0.0653 | -0.0079 | 0.0028  |   |
| 0.0086 | 1   | .   |                           |        |        |        |         |         |   |
| 3650   | CG  | CG  | . TYR TYR TYR B B 43 43 . | 0.1049 | 0.0888 | 0.0975 | 0.0267  | 0.0036  |   |
| 0.0129 | 1   | .   |                           |        |        |        |         |         |   |
| 3651   | CD1 | CD1 | . TYR TYR TYR B B 43 43 . | 0.0906 | 0.1174 | 0.1195 | -0.0119 | 0.0006  |   |
| 0.0255 | 1   | .   |                           |        |        |        |         |         |   |
| 3652   | CE1 | CE1 | . TYR TYR TYR B B 43 43 . | 0.1256 | 0.0785 | 0.0927 | 0.0223  | 0.0018  |   |
| 0.0109 | 1   | .   |                           |        |        |        |         |         |   |

|        |     |     |                           |        |        |        |         |         |   |
|--------|-----|-----|---------------------------|--------|--------|--------|---------|---------|---|
| 3653   | CZ  | CZ  | . TYR TYR TYR B B 43 43 . | 0.1574 | 0.1116 | 0.1433 | 0.0394  | 0.0485  |   |
| 0.0400 | 1   | .   |                           |        |        |        |         |         |   |
| 3654   | OH  | OH  | . TYR TYR TYR B B 43 43 . | 0.1931 | 0.1270 | 0.1570 | 0.0043  | 0.0447  |   |
| 0.0302 | 1   | .   |                           |        |        |        |         |         |   |
| 3655   | CE2 | CE2 | . TYR TYR TYR B B 43 43 . | 0.1335 | 0.1193 | 0.1287 | 0.0112  | 0.0491  |   |
| 0.0311 | 1   | .   |                           |        |        |        |         |         |   |
| 3656   | CD2 | CD2 | . TYR TYR TYR B B 43 43 . | 0.1740 | 0.1156 | 0.1359 | 0.0186  | 0.0432  |   |
| 0.0306 | 1   | .   |                           |        |        |        |         |         |   |
| 3657   | C   | C   | . TYR TYR TYR B B 43 43 . | 0.0777 | 0.0757 | 0.0824 | 0.0078  | 0.0000  |   |
| 0.0081 | 1   | .   |                           |        |        |        |         |         |   |
| 3658   | O   | O   | . TYR TYR TYR B B 43 43 . | 0.1177 | 0.1040 | 0.1027 | 0.0107  | 0.0017  |   |
| 0.0196 | 1   | .   |                           |        |        |        |         |         |   |
| 3659   | N   | N   | . GLU GLU GLU B B 44 44 . | 0.1077 | 0.0849 | 0.0661 | 0.0213  | 0.0158  |   |
| 0.0028 | 1   | .   |                           |        |        |        |         |         |   |
| 3660   | CA  | CA  | . GLU GLU GLU B B 44 44 . | 0.0880 | 0.0878 | 0.0911 | 0.0244  | 0.0137  |   |
| 0.0187 | 1   | .   |                           |        |        |        |         |         |   |
| 3661   | CB  | CB  | . GLU GLU GLU B B 44 44 . | 0.0984 | 0.1039 | 0.0817 | 0.0334  | 0.0118  |   |
| 0.0163 | 1   | .   |                           |        |        |        |         |         |   |
| 3662   | CG  | CG  | . GLU GLU GLU B B 44 44 . | 0.1099 | 0.0943 | 0.0980 | 0.0273  | 0.0174  |   |
| 0.0125 | 1   | .   |                           |        |        |        |         |         |   |
| 3663   | CD  | CD  | . GLU GLU GLU B B 44 44 . | 0.1089 | 0.0982 | 0.0982 | -0.0162 | 0.0107  |   |
| 0.0037 | 1   | .   |                           |        |        |        |         |         |   |
| 3664   | OE1 | OE1 | . GLU GLU GLU B B 44 44 . | 0.1365 | 0.0891 | 0.1116 | 0.0146  | 0.0159  |   |
| 0.0003 | 1   | .   |                           |        |        |        |         |         |   |
| 3665   | OE2 | OE2 | . GLU GLU GLU B B 44 44 . | 0.1194 | 0.1007 | 0.1027 | 0.0107  | 0.0023  |   |
| 0.0201 | 1   | .   |                           |        |        |        |         |         |   |
| 3666   | C   | C   | . GLU GLU GLU B B 44 44 . | 0.0913 | 0.0772 | 0.0782 | 0.0053  | 0.0061  |   |
| 0.0083 | 1   | .   |                           |        |        |        |         |         |   |
| 3667   | O   | O   | . GLU GLU GLU B B 44 44 . | 0.1205 | 0.1076 | 0.1009 | 0.0064  | 0.0067  |   |
| 0.0034 | 1   | .   |                           |        |        |        |         |         |   |
| 3668   | N   | N   | . ALA ALA ALA B B 45 45 . | 0.0912 | 0.1122 | 0.1080 | 0.0183  | -0.0075 |   |
| 0.0254 | 1   | .   |                           |        |        |        |         |         |   |
| 3669   | CA  | CA  | . ALA ALA ALA B B 45 45 . | 0.0910 | 0.1101 | 0.0837 | -0.0067 | -0.0064 |   |
| 0.0018 | 1   | .   |                           |        |        |        |         |         |   |
| 3670   | CB  | CB  | . ALA ALA ALA B B 45 45 . | 0.1055 | 0.1218 | 0.1256 | -0.0171 | 0.0067  |   |
| 0.0062 | 1   | .   |                           |        |        |        |         |         |   |
| 3671   | C   | C   | . ALA ALA ALA B B 45 45 . | 0.0965 | 0.1037 | 0.1094 | 0.0148  | -0.0079 | - |
| 0.0046 | 1   | .   |                           |        |        |        |         |         |   |
| 3672   | O   | O   | . ALA ALA ALA B B 45 45 . | 0.1100 | 0.1263 | 0.1171 | 0.0240  | 0.0108  |   |
| 0.0247 | 1   | .   |                           |        |        |        |         |         |   |
| 3673   | N   | N   | . LEU LEU LEU B B 46 46 . | 0.1291 | 0.1001 | 0.0884 | 0.0095  | -0.0040 | - |
| 0.0051 | 1   | .   |                           |        |        |        |         |         |   |
| 3674   | CA  | CA  | . LEU LEU LEU B B 46 46 . | 0.0971 | 0.1115 | 0.1190 | 0.0145  | -0.0028 | - |
| 0.0010 | 1   | .   |                           |        |        |        |         |         |   |
| 3675   | CB  | CB  | . LEU LEU LEU B B 46 46 . | 0.1883 | 0.1335 | 0.1643 | 0.0314  | -0.0118 | - |
| 0.0152 | 1   | .   |                           |        |        |        |         |         |   |
| 3676   | CG  | CG  | . LEU LEU LEU B B 46 46 . | 0.2202 | 0.2107 | 0.2192 | 0.0452  | -0.0469 | - |
| 0.0484 | 1   | .   |                           |        |        |        |         |         |   |
| 3677   | CD1 | CD1 | . LEU LEU LEU B B 46 46 . | 0.3359 | 0.2526 | 0.3100 | -0.0283 | -0.0302 | - |
| 0.0450 | 1   | .   |                           |        |        |        |         |         |   |
| 3678   | CD2 | CD2 | . LEU LEU LEU B B 46 46 . | 0.2763 | 0.3281 | 0.2318 | 0.0173  | 0.0059  | - |
| 0.0699 | 1   | .   |                           |        |        |        |         |         |   |
| 3679   | C   | C   | . LEU LEU LEU B B 46 46 . | 0.1183 | 0.1165 | 0.1154 | 0.0025  | 0.0100  | - |
| 0.0047 | 1   | .   |                           |        |        |        |         |         |   |
| 3680   | O   | O   | . LEU LEU LEU B B 46 46 . | 0.1210 | 0.1376 | 0.1650 | 0.0011  | 0.0039  |   |
| 0.0205 | 1   | .   |                           |        |        |        |         |         |   |
| 3681   | N   | N   | . GLU GLU GLU B B 47 47 . | 0.1477 | 0.1287 | 0.1172 | 0.0151  | -0.0135 |   |
| 0.0082 | 1   | .   |                           |        |        |        |         |         |   |
| 3682   | CA  | CA  | . GLU GLU GLU B B 47 47 . | 0.1155 | 0.1272 | 0.1077 | 0.0166  | 0.0118  |   |
| 0.0056 | 1   | .   |                           |        |        |        |         |         |   |



|        |     |     |                         |                                          |
|--------|-----|-----|-------------------------|------------------------------------------|
| 3713   | OD1 | OD1 | . ASP ASP ASP B B 50 50 | . 0.1449 0.1199 0.1386 0.0127 0.0121 -   |
| 0.0153 | 1 . |     |                         |                                          |
| 3714   | OD2 | OD2 | . ASP ASP ASP B B 50 50 | . 0.1430 0.1353 0.1372 0.0345 -0.0020 -  |
| 0.0089 | 1 . |     |                         |                                          |
| 3715   | C   | C   | . ASP ASP ASP B B 50 50 | . 0.1484 0.1572 0.1662 0.0047 0.0022 -   |
| 0.0072 | 1 . |     |                         |                                          |
| 3716   | O   | O   | . ASP ASP ASP B B 50 50 | . 0.1901 0.1432 0.2002 0.0070 -0.0134 -  |
| 0.0194 | 1 . |     |                         |                                          |
| 3717   | N   | N   | . GLY GLY GLY B B 51 51 | . 0.1154 0.1386 0.1801 0.0028 -0.0026 -  |
| 0.0208 | 1 . |     |                         |                                          |
| 3718   | CA  | CA  | . GLY GLY GLY B B 51 51 | . 0.1863 0.1608 0.1766 -0.0200 -0.0135 - |
| 0.0088 | 1 . |     |                         |                                          |
| 3719   | C   | C   | . GLY GLY GLY B B 51 51 | . 0.2210 0.1713 0.2133 -0.0327 -0.0132 - |
| 0.0273 | 1 . |     |                         |                                          |
| 3720   | O   | O   | . GLY GLY GLY B B 51 51 | . 0.2918 0.1353 0.2928 -0.0252 -0.0344 - |
| 0.0114 | 1 . |     |                         |                                          |
| 3721   | N   | N   | . ASP ASP ASP B B 52 52 | . 0.1983 0.1576 0.1943 -0.0072 -0.0302 - |
| 0.0315 | 1 . |     |                         |                                          |
| 3722   | CA  | CA  | . ASP ASP ASP B B 52 52 | . 0.2029 0.1733 0.2032 -0.0071 -0.0368 - |
| 0.0399 | 1 . |     |                         |                                          |
| 3723   | CB  | CB  | . ASP ASP ASP B B 52 52 | . 0.2310 0.1547 0.1806 0.0320 -0.0360 -  |
| 0.0505 | 1 . |     |                         |                                          |
| 3724   | CG  | CG  | . ASP ASP ASP B B 52 52 | . 0.2153 0.2168 0.2205 0.0161 -0.0166 -  |
| 0.0401 | 1 . |     |                         |                                          |
| 3725   | OD1 | OD1 | . ASP ASP ASP B B 52 52 | . 0.2496 0.2356 0.2818 0.0073 -0.0481 -  |
| 0.0428 | 1 . |     |                         |                                          |
| 3726   | OD2 | OD2 | . ASP ASP ASP B B 52 52 | . 0.3378 0.2427 0.2285 0.0164 -0.0260 -  |
| 0.0879 | 1 . |     |                         |                                          |
| 3727   | C   | C   | . ASP ASP ASP B B 52 52 | . 0.2155 0.2030 0.2565 -0.0126 -0.0289 - |
| 0.0104 | 1 . |     |                         |                                          |
| 3728   | O   | O   | . ASP ASP ASP B B 52 52 | . 0.1992 0.1814 0.2445 0.0024 -0.0323 -  |
| 0.0343 | 1 . |     |                         |                                          |
| 3729   | N   | N   | . LYS LYS LYS B B 53 53 | . 0.2319 0.2124 0.2469 -0.0204 -0.0239   |
| 0.0047 | 1 . |     |                         |                                          |
| 3730   | CA  | CA  | . LYS LYS LYS B B 53 53 | . 0.2676 0.2287 0.2928 -0.0080 -0.0345   |
| 0.0179 | 1 . |     |                         |                                          |
| 3731   | CB  | CB  | . LYS LYS LYS B B 53 53 | . 0.2812 0.2492 0.3362 -0.0401 -0.0202   |
| 0.0221 | 1 . |     |                         |                                          |
| 3732   | CG  | CG  | . LYS LYS LYS B B 53 53 | . 0.4120 0.3746 0.3787 0.0023 -0.0253    |
| 0.0149 | 1 . |     |                         |                                          |
| 3733   | CD  | CD  | . LYS LYS LYS B B 53 53 | . 0.5649 0.4519 0.5543 -0.0145 -0.0059   |
| 0.0375 | 1 . |     |                         |                                          |
| 3734   | CE  | CE  | . LYS LYS LYS B B 53 53 | . 0.5558 0.5589 0.6028 -0.0405 0.0060 -  |
| 0.0019 | 1 . |     |                         |                                          |
| 3735   | NZ  | NZ  | . LYS LYS LYS B B 53 53 | . 0.6550 0.6043 0.6021 -0.0597 0.0628    |
| 0.0305 | 1 . |     |                         |                                          |
| 3736   | C   | C   | . LYS LYS LYS B B 53 53 | . 0.2637 0.2214 0.2958 -0.0049 -0.0287   |
| 0.0019 | 1 . |     |                         |                                          |
| 3737   | O   | O   | . LYS LYS LYS B B 53 53 | . 0.2487 0.2675 0.3472 -0.0093 -0.0538   |
| 0.0030 | 1 . |     |                         |                                          |
| 3738   | N   | N   | . GLN GLN GLN B B 54 54 | . 0.2758 0.1822 0.2756 -0.0061 -0.0517 - |
| 0.0112 | 1 . |     |                         |                                          |
| 3739   | CA  | CA  | . GLN GLN GLN B B 54 54 | . 0.2972 0.2060 0.2563 0.0031 -0.0331 -  |
| 0.0123 | 1 . |     |                         |                                          |
| 3740   | CB  | CB  | . GLN GLN GLN B B 54 54 | . 0.3172 0.2359 0.2436 -0.0001 -0.0286   |
| 0.0000 | 1 . |     |                         |                                          |
| 3741   | CG  | CG  | . GLN GLN GLN B B 54 54 | . 0.4188 0.2811 0.3494 0.0045 -0.0495 -  |
| 0.0332 | 1 . |     |                         |                                          |
| 3742   | CD  | CD  | . GLN GLN GLN B B 54 54 | . 0.4613 0.3996 0.4569 -0.0467 -0.0565 - |
| 0.0038 | 1 . |     |                         |                                          |



|        |     |     |                           |        |        |        |         |         |   |
|--------|-----|-----|---------------------------|--------|--------|--------|---------|---------|---|
| 3773   | CG  | CG  | . LEU LEU LEU B B 57 57 . | 0.2505 | 0.2462 | 0.2770 | 0.0084  | -0.0016 |   |
| 0.0308 | 1   | .   |                           |        |        |        |         |         |   |
| 3774   | CD1 | CD1 | . LEU LEU LEU B B 57 57 . | 0.2916 | 0.2313 | 0.3327 | 0.0157  | 0.0256  |   |
| 0.0570 | 1   | .   |                           |        |        |        |         |         |   |
| 3775   | CD2 | CD2 | . LEU LEU LEU B B 57 57 . | 0.2033 | 0.2434 | 0.3323 | 0.0014  | -0.0178 |   |
| 0.0434 | 1   | .   |                           |        |        |        |         |         |   |
| 3776   | C   | C   | . LEU LEU LEU B B 57 57 . | 0.1998 | 0.1821 | 0.1970 | 0.0003  | -0.0013 | - |
| 0.0028 | 1   | .   |                           |        |        |        |         |         |   |
| 3777   | O   | O   | . LEU LEU LEU B B 57 57 . | 0.2236 | 0.2265 | 0.2329 | 0.0064  | -0.0020 | - |
| 0.0025 | 1   | .   |                           |        |        |        |         |         |   |
| 3778   | N   | N   | . GLY GLY GLY B B 58 58 . | 0.1711 | 0.1368 | 0.2165 | -0.0152 | -0.0203 | - |
| 0.0321 | 1   | .   |                           |        |        |        |         |         |   |
| 3779   | CA  | CA  | . GLY GLY GLY B B 58 58 . | 0.1874 | 0.1447 | 0.2278 | 0.0050  | -0.0292 | - |
| 0.0220 | 1   | .   |                           |        |        |        |         |         |   |
| 3780   | C   | C   | . GLY GLY GLY B B 58 58 . | 0.1691 | 0.1434 | 0.1782 | 0.0109  | -0.0123 | - |
| 0.0088 | 1   | .   |                           |        |        |        |         |         |   |
| 3781   | O   | O   | . GLY GLY GLY B B 58 58 . | 0.1604 | 0.1120 | 0.1634 | 0.0220  | -0.0056 | - |
| 0.0309 | 1   | .   |                           |        |        |        |         |         |   |
| 3782   | N   | N   | . LYS LYS LYS B B 59 59 . | 0.1430 | 0.1215 | 0.1536 | -0.0013 | -0.0085 | - |
| 0.0133 | 1   | .   |                           |        |        |        |         |         |   |
| 3783   | CA  | CA  | . LYS LYS LYS B B 59 59 . | 0.1295 | 0.1111 | 0.1451 | 0.0025  | -0.0018 | - |
| 0.0115 | 1   | .   |                           |        |        |        |         |         |   |
| 3784   | CB  | CB  | . LYS LYS LYS B B 59 59 . | 0.1379 | 0.1420 | 0.1626 | -0.0110 | 0.0421  | - |
| 0.0287 | 1   | .   |                           |        |        |        |         |         |   |
| 3785   | CG  | CG  | . LYS LYS LYS B B 59 59 . | 0.1487 | 0.1731 | 0.2211 | 0.0044  | 0.0455  |   |
| 0.0033 | 1   | .   |                           |        |        |        |         |         |   |
| 3786   | CD  | CD  | . LYS LYS LYS B B 59 59 . | 0.2180 | 0.2868 | 0.3721 | 0.0435  | 0.1182  | - |
| 0.0293 | 1   | .   |                           |        |        |        |         |         |   |
| 3787   | CE  | CE  | . LYS LYS LYS B B 59 59 . | 0.2927 | 0.3521 | 0.3865 | -0.0064 | 0.1011  |   |
| 0.0072 | 1   | .   |                           |        |        |        |         |         |   |
| 3788   | NZ  | NZ  | . LYS LYS LYS B B 59 59 . | 0.3689 | 0.4228 | 0.4211 | 0.0250  | 0.1119  |   |
| 0.0057 | 1   | .   |                           |        |        |        |         |         |   |
| 3789   | C   | C   | . LYS LYS LYS B B 59 59 . | 0.1160 | 0.1185 | 0.1066 | 0.0038  | 0.0099  | - |
| 0.0052 | 1   | .   |                           |        |        |        |         |         |   |
| 3790   | O   | O   | . LYS LYS LYS B B 59 59 . | 0.1648 | 0.1036 | 0.1114 | 0.0080  | 0.0089  | - |
| 0.0155 | 1   | .   |                           |        |        |        |         |         |   |
| 3791   | N   | N   | . GLY GLY GLY B B 60 60 . | 0.1311 | 0.1182 | 0.1134 | 0.0228  | 0.0011  |   |
| 0.0065 | 1   | .   |                           |        |        |        |         |         |   |
| 3792   | CA  | CA  | . GLY GLY GLY B B 60 60 . | 0.1367 | 0.1430 | 0.1073 | 0.0073  | -0.0140 |   |
| 0.0005 | 1   | .   |                           |        |        |        |         |         |   |
| 3793   | C   | C   | . GLY GLY GLY B B 60 60 . | 0.1070 | 0.0978 | 0.1097 | -0.0020 | -0.0049 | - |
| 0.0082 | 1   | .   |                           |        |        |        |         |         |   |
| 3794   | O   | O   | . GLY GLY GLY B B 60 60 . | 0.1410 | 0.0980 | 0.1166 | 0.0223  | -0.0025 | - |
| 0.0123 | 1   | .   |                           |        |        |        |         |         |   |
| 3795   | N   | N   | . VAL VAL VAL B B 61 61 . | 0.0828 | 0.0964 | 0.1107 | 0.0093  | -0.0078 |   |
| 0.0044 | 1   | .   |                           |        |        |        |         |         |   |
| 3796   | CA  | CA  | . VAL VAL VAL B B 61 61 . | 0.0820 | 0.1152 | 0.1069 | 0.0065  | -0.0017 | - |
| 0.0199 | 1   | .   |                           |        |        |        |         |         |   |
| 3797   | CB  | CB  | . VAL VAL VAL B B 61 61 . | 0.1199 | 0.0989 | 0.1138 | 0.0047  | 0.0069  | - |
| 0.0050 | 1   | .   |                           |        |        |        |         |         |   |
| 3798   | CG1 | CG1 | . VAL VAL VAL B B 61 61 . | 0.1338 | 0.1185 | 0.0939 | -0.0043 | 0.0430  |   |
| 0.0034 | 1   | .   |                           |        |        |        |         |         |   |
| 3799   | CG2 | CG2 | . VAL VAL VAL B B 61 61 . | 0.1142 | 0.0839 | 0.1275 | 0.0086  | 0.0111  |   |
| 0.0157 | 1   | .   |                           |        |        |        |         |         |   |
| 3800   | C   | C   | . VAL VAL VAL B B 61 61 . | 0.1128 | 0.0965 | 0.0934 | 0.0069  | 0.0023  | - |
| 0.0029 | 1   | .   |                           |        |        |        |         |         |   |
| 3801   | O   | O   | . VAL VAL VAL B B 61 61 . | 0.0864 | 0.1055 | 0.1150 | 0.0140  | 0.0170  | - |
| 0.0228 | 1   | .   |                           |        |        |        |         |         |   |
| 3802   | N   | N   | . LEU LEU LEU B B 62 62 . | 0.1137 | 0.1056 | 0.1051 | 0.0222  | 0.0066  | - |
| 0.0057 | 1   | .   |                           |        |        |        |         |         |   |



|        |     |     |                         |                                         |
|--------|-----|-----|-------------------------|-----------------------------------------|
| 3833   | CB  | CB  | . ASP ASP ASP B B 66 66 | . 0.1369 0.1689 0.1782 0.0281 0.0096 -  |
| 0.0380 | 1   | .   |                         |                                         |
| 3834   | CG  | CG  | . ASP ASP ASP B B 66 66 | . 0.1908 0.2914 0.2601 0.0306 -0.0157 - |
| 0.0177 | 1   | .   |                         |                                         |
| 3835   | OD1 | OD1 | . ASP ASP ASP B B 66 66 | . 0.3655 0.3293 0.4394 0.0717 0.0185 -  |
| 0.0463 | 1   | .   |                         |                                         |
| 3836   | OD2 | OD2 | . ASP ASP ASP B B 66 66 | . 0.2053 0.4590 0.2541 0.0138 0.0542 -  |
| 0.0531 | 1   | .   |                         |                                         |
| 3837   | C   | C   | . ASP ASP ASP B B 66 66 | . 0.1327 0.1405 0.1504 0.0014 -0.0005   |
| 0.0123 | 1   | .   |                         |                                         |
| 3838   | O   | O   | . ASP ASP ASP B B 66 66 | . 0.1489 0.1686 0.1592 0.0073 0.0007    |
| 0.0052 | 1   | .   |                         |                                         |
| 3839   | N   | N   | . HIS HIS HIS B B 67 67 | . 0.1471 0.1570 0.1240 0.0121 0.0198 -  |
| 0.0144 | 1   | .   |                         |                                         |
| 3840   | CA  | CA  | . HIS HIS HIS B B 67 67 | . 0.1348 0.1175 0.1275 0.0044 -0.0006 - |
| 0.0062 | 1   | .   |                         |                                         |
| 3841   | CB  | CB  | . HIS HIS HIS B B 67 67 | . 0.1202 0.1272 0.1681 0.0033 0.0218 -  |
| 0.0128 | 1   | .   |                         |                                         |
| 3842   | CG  | CG  | . HIS HIS HIS B B 67 67 | . 0.1727 0.1335 0.1797 0.0192 0.0079 -  |
| 0.0092 | 1   | .   |                         |                                         |
| 3843   | ND1 | ND1 | . HIS HIS HIS B B 67 67 | . 0.1415 0.1791 0.1842 0.0297 -0.0187   |
| 0.0000 | 1   | .   |                         |                                         |
| 3844   | CE1 | CE1 | . HIS HIS HIS B B 67 67 | . 0.1617 0.1456 0.1975 0.0178 -0.0092   |
| 0.0217 | 1   | .   |                         |                                         |
| 3845   | NE2 | NE2 | . HIS HIS HIS B B 67 67 | . 0.1447 0.1426 0.2104 0.0130 -0.0194 - |
| 0.0131 | 1   | .   |                         |                                         |
| 3846   | CD2 | CD2 | . HIS HIS HIS B B 67 67 | . 0.1631 0.1198 0.1765 0.0099 -0.0074   |
| 0.0121 | 1   | .   |                         |                                         |
| 3847   | C   | C   | . HIS HIS HIS B B 67 67 | . 0.1321 0.1148 0.1603 0.0130 -0.0166   |
| 0.0042 | 1   | .   |                         |                                         |
| 3848   | O   | O   | . HIS HIS HIS B B 67 67 | . 0.1351 0.1542 0.1793 0.0240 -0.0015   |
| 0.0105 | 1   | .   |                         |                                         |
| 3849   | N   | N   | . ILE ILE ILE B B 68 68 | . 0.1208 0.1322 0.1280 0.0304 -0.0038 - |
| 0.0114 | 1   | .   |                         |                                         |
| 3850   | CA  | CA  | . ILE ILE ILE B B 68 68 | . 0.1107 0.1374 0.1392 0.0346 0.0062    |
| 0.0144 | 1   | .   |                         |                                         |
| 3851   | CB  | CB  | . ILE ILE ILE B B 68 68 | . 0.1123 0.1284 0.1038 0.0307 0.0042    |
| 0.0082 | 1   | .   |                         |                                         |
| 3852   | CG1 | CG1 | . ILE ILE ILE B B 68 68 | . 0.1251 0.1352 0.1208 0.0248 0.0236    |
| 0.0374 | 1   | .   |                         |                                         |
| 3853   | CD  | CD  | . ILE ILE ILE B B 68 68 | . 0.1163 0.1243 0.1354 0.0083 0.0243    |
| 0.0159 | 1   | .   |                         |                                         |
| 3854   | CG2 | CG2 | . ILE ILE ILE B B 68 68 | . 0.1334 0.1370 0.1222 0.0073 -0.0202   |
| 0.0266 | 1   | .   |                         |                                         |
| 3855   | C   | C   | . ILE ILE ILE B B 68 68 | . 0.1315 0.1286 0.1280 -0.0123 0.0059 - |
| 0.0014 | 1   | .   |                         |                                         |
| 3856   | O   | O   | . ILE ILE ILE B B 68 68 | . 0.1310 0.1645 0.1458 0.0131 0.0008    |
| 0.0127 | 1   | .   |                         |                                         |
| 3857   | N   | N   | . ASN ASN ASN B B 69 69 | . 0.1219 0.1332 0.1129 0.0149 -0.0008   |
| 0.0122 | 1   | .   |                         |                                         |
| 3858   | CA  | CA  | . ASN ASN ASN B B 69 69 | . 0.1381 0.1638 0.1543 0.0244 -0.0050   |
| 0.0191 | 1   | .   |                         |                                         |
| 3859   | CB  | CB  | . ASN ASN ASN B B 69 69 | . 0.1302 0.1635 0.1180 0.0096 0.0195    |
| 0.0101 | 1   | .   |                         |                                         |
| 3860   | CG  | CG  | . ASN ASN ASN B B 69 69 | . 0.1300 0.1353 0.1055 0.0032 0.0076 -  |
| 0.0019 | 1   | .   |                         |                                         |
| 3861   | OD1 | OD1 | . ASN ASN ASN B B 69 69 | . 0.1130 0.1721 0.1610 0.0194 -0.0103   |
| 0.0055 | 1   | .   |                         |                                         |
| 3862   | ND2 | ND2 | . ASN ASN ASN B B 69 69 | . 0.1162 0.1529 0.1128 0.0089 0.0027    |
| 0.0190 | 1   | .   |                         |                                         |



|        |     |     |                           |        |        |        |        |         |   |
|--------|-----|-----|---------------------------|--------|--------|--------|--------|---------|---|
| 3863   | C   | C   | . ASN ASN ASN B B 69 69 . | 0.1248 | 0.1579 | 0.1523 | 0.0202 | 0.0026  |   |
| 0.0139 | 1   | .   |                           |        |        |        |        |         |   |
| 3864   | O   | O   | . ASN ASN ASN B B 69 69 . | 0.1286 | 0.1917 | 0.1781 | 0.0168 | 0.0059  |   |
| 0.0182 | 1   | .   |                           |        |        |        |        |         |   |
| 3865   | N   | N   | . SER SER SER B B 70 70 . | 0.1379 | 0.1572 | 0.1291 | 0.0326 | -0.0047 |   |
| 0.0013 | 1   | .   |                           |        |        |        |        |         |   |
| 3866   | CA  | CA  | . SER SER SER B B 70 70 . | 0.1158 | 0.1680 | 0.1516 | 0.0477 | 0.0063  |   |
| 0.0021 | 1   | .   |                           |        |        |        |        |         |   |
| 3867   | CB  | CB  | . SER SER SER B B 70 70 . | 0.1586 | 0.2212 | 0.1870 | 0.0616 | -0.0298 | - |
| 0.0308 | 1   | .   |                           |        |        |        |        |         |   |
| 3868   | OG  | OG  | . SER SER SER B B 70 70 . | 0.2667 | 0.3458 | 0.2412 | 0.0148 | -0.0036 |   |
| 0.0134 | 1   | .   |                           |        |        |        |        |         |   |
| 3869   | C   | C   | . SER SER SER B B 70 70 . | 0.1237 | 0.1940 | 0.1582 | 0.0388 | 0.0092  | - |
| 0.0034 | 1   | .   |                           |        |        |        |        |         |   |
| 3870   | O   | O   | . SER SER SER B B 70 70 . | 0.1382 | 0.2439 | 0.1997 | 0.0537 | 0.0334  | - |
| 0.0108 | 1   | .   |                           |        |        |        |        |         |   |
| 3871   | N   | N   | . THR THR THR B B 71 71 . | 0.1323 | 0.1732 | 0.1365 | 0.0273 | -0.0204 | - |
| 0.0179 | 1   | .   |                           |        |        |        |        |         |   |
| 3872   | CA  | CA  | . THR THR THR B B 71 71 . | 0.1207 | 0.1456 | 0.1568 | 0.0339 | -0.0130 | - |
| 0.0022 | 1   | .   |                           |        |        |        |        |         |   |
| 3873   | CB  | CB  | . THR THR THR B B 71 71 . | 0.1442 | 0.1485 | 0.1458 | 0.0364 | -0.0215 | - |
| 0.0122 | 1   | .   |                           |        |        |        |        |         |   |
| 3874   | OG1 | OG1 | . THR THR THR B B 71 71 . | 0.1501 | 0.1623 | 0.1729 | 0.0141 | 0.0159  | - |
| 0.0043 | 1   | .   |                           |        |        |        |        |         |   |
| 3875   | CG2 | CG2 | . THR THR THR B B 71 71 . | 0.1938 | 0.1757 | 0.1958 | 0.0749 | -0.0502 |   |
| 0.0101 | 1   | .   |                           |        |        |        |        |         |   |
| 3876   | C   | C   | . THR THR THR B B 71 71 . | 0.1254 | 0.1604 | 0.1732 | 0.0272 | -0.0176 | - |
| 0.0191 | 1   | .   |                           |        |        |        |        |         |   |
| 3877   | O   | O   | . THR THR THR B B 71 71 . | 0.1069 | 0.1562 | 0.1773 | 0.0130 | 0.0011  |   |
| 0.0025 | 1   | .   |                           |        |        |        |        |         |   |
| 3878   | N   | N   | . ILE ILE ILE B B 72 72 . | 0.1014 | 0.1260 | 0.1363 | 0.0360 | 0.0206  | - |
| 0.0128 | 1   | .   |                           |        |        |        |        |         |   |
| 3879   | CA  | CA  | . ILE ILE ILE B B 72 72 . | 0.0894 | 0.1481 | 0.1447 | 0.0089 | 0.0024  | - |
| 0.0071 | 1   | .   |                           |        |        |        |        |         |   |
| 3880   | CB  | CB  | . ILE ILE ILE B B 72 72 . | 0.0910 | 0.1219 | 0.1396 | 0.0226 | 0.0165  | - |
| 0.0125 | 1   | .   |                           |        |        |        |        |         |   |
| 3881   | CG1 | CG1 | . ILE ILE ILE B B 72 72 . | 0.0958 | 0.1349 | 0.1730 | 0.0335 | 0.0424  |   |
| 0.0074 | 1   | .   |                           |        |        |        |        |         |   |
| 3882   | CD  | CD  | . ILE ILE ILE B B 72 72 . | 0.0889 | 0.1877 | 0.1583 | 0.0505 | 0.0220  |   |
| 0.0792 | 1   | .   |                           |        |        |        |        |         |   |
| 3883   | CG2 | CG2 | . ILE ILE ILE B B 72 72 . | 0.1359 | 0.1910 | 0.1428 | 0.0117 | 0.0014  | - |
| 0.0056 | 1   | .   |                           |        |        |        |        |         |   |
| 3884   | C   | C   | . ILE ILE ILE B B 72 72 . | 0.1282 | 0.1411 | 0.1233 | 0.0043 | 0.0054  |   |
| 0.0025 | 1   | .   |                           |        |        |        |        |         |   |
| 3885   | O   | O   | . ILE ILE ILE B B 72 72 . | 0.1056 | 0.2018 | 0.1507 | 0.0226 | -0.0072 |   |
| 0.0098 | 1   | .   |                           |        |        |        |        |         |   |
| 3886   | N   | N   | . ALA ALA ALA B B 73 73 . | 0.1030 | 0.1161 | 0.1397 | 0.0334 | 0.0115  |   |
| 0.0068 | 1   | .   |                           |        |        |        |        |         |   |
| 3887   | CA  | CA  | . ALA ALA ALA B B 73 73 . | 0.1153 | 0.1551 | 0.1538 | 0.0184 | 0.0146  |   |
| 0.0067 | 1   | .   |                           |        |        |        |        |         |   |
| 3888   | CB  | CB  | . ALA ALA ALA B B 73 73 . | 0.1417 | 0.1784 | 0.1660 | 0.0237 | 0.0052  | - |
| 0.0078 | 1   | .   |                           |        |        |        |        |         |   |
| 3889   | C   | C   | . ALA ALA ALA B B 73 73 . | 0.1300 | 0.1473 | 0.1465 | 0.0134 | 0.0170  | - |
| 0.0151 | 1   | .   |                           |        |        |        |        |         |   |
| 3890   | O   | O   | . ALA ALA ALA B B 73 73 . | 0.1198 | 0.1732 | 0.1816 | 0.0063 | 0.0286  | - |
| 0.0033 | 1   | .   |                           |        |        |        |        |         |   |
| 3891   | N   | N   | . PRO PRO PRO B B 74 74 . | 0.1379 | 0.1568 | 0.1574 | 0.0191 | 0.0128  |   |
| 0.0109 | 1   | .   |                           |        |        |        |        |         |   |
| 3892   | CA  | CA  | . PRO PRO PRO B B 74 74 . | 0.1332 | 0.1674 | 0.1638 | 0.0137 | 0.0199  |   |
| 0.0019 | 1   | .   |                           |        |        |        |        |         |   |

|        |     |     |                           |        |        |        |         |         |   |
|--------|-----|-----|---------------------------|--------|--------|--------|---------|---------|---|
| 3893   | CB  | CB  | . PRO PRO PRO B B 74 74 . | 0.1299 | 0.1632 | 0.1764 | 0.0198  | 0.0035  |   |
| 0.0014 | 1   | .   |                           |        |        |        |         |         |   |
| 3894   | CG  | CG  | . PRO PRO PRO B B 74 74 . | 0.1410 | 0.1742 | 0.1816 | 0.0294  | 0.0445  | - |
| 0.0133 | 1   | .   |                           |        |        |        |         |         |   |
| 3895   | CD  | CD  | . PRO PRO PRO B B 74 74 . | 0.1396 | 0.1332 | 0.1815 | 0.0110  | 0.0436  |   |
| 0.0029 | 1   | .   |                           |        |        |        |         |         |   |
| 3896   | C   | C   | . PRO PRO PRO B B 74 74 . | 0.1389 | 0.1463 | 0.1646 | 0.0222  | 0.0092  |   |
| 0.0071 | 1   | .   |                           |        |        |        |         |         |   |
| 3897   | O   | O   | . PRO PRO PRO B B 74 74 . | 0.1560 | 0.1835 | 0.1826 | 0.0103  | -0.0024 |   |
| 0.0045 | 1   | .   |                           |        |        |        |         |         |   |
| 3898   | N   | N   | . ALA ALA ALA B B 75 75 . | 0.1213 | 0.1644 | 0.1545 | 0.0340  | 0.0073  |   |
| 0.0042 | 1   | .   |                           |        |        |        |         |         |   |
| 3899   | CA  | CA  | . ALA ALA ALA B B 75 75 . | 0.1118 | 0.1481 | 0.1478 | 0.0051  | -0.0091 |   |
| 0.0110 | 1   | .   |                           |        |        |        |         |         |   |
| 3900   | CB  | CB  | . ALA ALA ALA B B 75 75 . | 0.1675 | 0.1553 | 0.1738 | -0.0006 | 0.0107  |   |
| 0.0329 | 1   | .   |                           |        |        |        |         |         |   |
| 3901   | C   | C   | . ALA ALA ALA B B 75 75 . | 0.1289 | 0.1439 | 0.1743 | 0.0188  | -0.0099 | - |
| 0.0019 | 1   | .   |                           |        |        |        |         |         |   |
| 3902   | O   | O   | . ALA ALA ALA B B 75 75 . | 0.1231 | 0.1413 | 0.1733 | 0.0114  | 0.0000  | - |
| 0.0135 | 1   | .   |                           |        |        |        |         |         |   |
| 3903   | N   | N   | . LEU LEU LEU B B 76 76 . | 0.1352 | 0.1542 | 0.1572 | 0.0294  | 0.0065  |   |
| 0.0047 | 1   | .   |                           |        |        |        |         |         |   |
| 3904   | CA  | CA  | . LEU LEU LEU B B 76 76 . | 0.1139 | 0.1487 | 0.1577 | 0.0452  | 0.0122  | - |
| 0.0053 | 1   | .   |                           |        |        |        |         |         |   |
| 3905   | CB  | CB  | . LEU LEU LEU B B 76 76 . | 0.1231 | 0.1683 | 0.1855 | 0.0449  | 0.0176  |   |
| 0.0201 | 1   | .   |                           |        |        |        |         |         |   |
| 3906   | CG  | CG  | . LEU LEU LEU B B 76 76 . | 0.1381 | 0.1858 | 0.2050 | 0.0588  | 0.0330  |   |
| 0.0378 | 1   | .   |                           |        |        |        |         |         |   |
| 3907   | CD1 | CD1 | . LEU LEU LEU B B 76 76 . | 0.1008 | 0.2144 | 0.2382 | 0.0606  | 0.0519  |   |
| 0.0293 | 1   | .   |                           |        |        |        |         |         |   |
| 3908   | CD2 | CD2 | . LEU LEU LEU B B 76 76 . | 0.1406 | 0.2783 | 0.2913 | 0.1045  | 0.0053  |   |
| 0.0994 | 1   | .   |                           |        |        |        |         |         |   |
| 3909   | C   | C   | . LEU LEU LEU B B 76 76 . | 0.1358 | 0.1464 | 0.1534 | 0.0234  | -0.0160 | - |
| 0.0010 | 1   | .   |                           |        |        |        |         |         |   |
| 3910   | O   | O   | . LEU LEU LEU B B 76 76 . | 0.1179 | 0.1559 | 0.1653 | 0.0148  | 0.0009  |   |
| 0.0246 | 1   | .   |                           |        |        |        |         |         |   |
| 3911   | N   | N   | . ILE ILE ILE B B 77 77 . | 0.1297 | 0.1573 | 0.1661 | 0.0241  | 0.0274  |   |
| 0.0130 | 1   | .   |                           |        |        |        |         |         |   |
| 3912   | CA  | CA  | . ILE ILE ILE B B 77 77 . | 0.1112 | 0.1613 | 0.1464 | 0.0249  | 0.0203  |   |
| 0.0281 | 1   | .   |                           |        |        |        |         |         |   |
| 3913   | CB  | CB  | . ILE ILE ILE B B 77 77 . | 0.1332 | 0.1655 | 0.1564 | 0.0258  | 0.0297  |   |
| 0.0103 | 1   | .   |                           |        |        |        |         |         |   |
| 3914   | CG1 | CG1 | . ILE ILE ILE B B 77 77 . | 0.1510 | 0.1799 | 0.1912 | 0.0610  | -0.0061 |   |
| 0.0154 | 1   | .   |                           |        |        |        |         |         |   |
| 3915   | CD  | CD  | . ILE ILE ILE B B 77 77 . | 0.2032 | 0.1806 | 0.2053 | 0.0216  | -0.0344 |   |
| 0.0405 | 1   | .   |                           |        |        |        |         |         |   |
| 3916   | CG2 | CG2 | . ILE ILE ILE B B 77 77 . | 0.1178 | 0.2127 | 0.2150 | -0.0032 | 0.0452  |   |
| 0.0599 | 1   | .   |                           |        |        |        |         |         |   |
| 3917   | C   | C   | . ILE ILE ILE B B 77 77 . | 0.1414 | 0.1765 | 0.1735 | 0.0258  | 0.0041  |   |
| 0.0071 | 1   | .   |                           |        |        |        |         |         |   |
| 3918   | O   | O   | . ILE ILE ILE B B 77 77 . | 0.1342 | 0.2021 | 0.1958 | 0.0246  | -0.0092 |   |
| 0.0188 | 1   | .   |                           |        |        |        |         |         |   |
| 3919   | N   | N   | . SER SER SER B B 78 78 . | 0.1186 | 0.1610 | 0.1944 | 0.0235  | -0.0028 |   |
| 0.0053 | 1   | .   |                           |        |        |        |         |         |   |
| 3920   | CA  | CA  | . SER SER SER B B 78 78 . | 0.1208 | 0.1761 | 0.2076 | 0.0137  | 0.0116  | - |
| 0.0038 | 1   | .   |                           |        |        |        |         |         |   |
| 3921   | CB  | CB  | . SER SER SER B B 78 78 . | 0.1100 | 0.1711 | 0.3117 | 0.0452  | 0.0436  |   |
| 0.0173 | 1   | .   |                           |        |        |        |         |         |   |
| 3922   | OG  | OG  | . SER SER SER B B 78 78 . | 0.3546 | 0.3508 | 0.3962 | 0.0038  | -0.0118 |   |
| 0.0101 | 1   | .   |                           |        |        |        |         |         |   |







|        |     |     |                         |                                         |
|--------|-----|-----|-------------------------|-----------------------------------------|
| 4013   | C   | C   | . ASP ASP ASP B B 90 90 | . 0.1327 0.1357 0.1394 0.0068 -0.0109   |
| 0.0072 | 1   | .   |                         |                                         |
| 4014   | O   | O   | . ASP ASP ASP B B 90 90 | . 0.1072 0.1385 0.1808 0.0142 -0.0078 - |
| 0.0017 | 1   | .   |                         |                                         |
| 4015   | N   | N   | . ASN ASN ASN B B 91 91 | . 0.1296 0.1461 0.1637 0.0045 -0.0038   |
| 0.0014 | 1   | .   |                         |                                         |
| 4016   | CA  | CA  | . ASN ASN ASN B B 91 91 | . 0.1596 0.1591 0.1650 0.0011 -0.0245   |
| 0.0072 | 1   | .   |                         |                                         |
| 4017   | CB  | CB  | . ASN ASN ASN B B 91 91 | . 0.1823 0.1771 0.2193 0.0334 -0.0581   |
| 0.0516 | 1   | .   |                         |                                         |
| 4018   | CG  | CG  | . ASN ASN ASN B B 91 91 | . 0.3050 0.3702 0.2456 0.0822 -0.0192   |
| 0.0266 | 1   | .   |                         |                                         |
| 4019   | OD1 | OD1 | . ASN ASN ASN B B 91 91 | . 0.3494 0.4899 0.3492 0.1641 -0.0322   |
| 0.0556 | 1   | .   |                         |                                         |
| 4020   | ND2 | ND2 | . ASN ASN ASN B B 91 91 | . 0.4449 0.4897 0.4789 0.1230 -0.0306   |
| 0.0428 | 1   | .   |                         |                                         |
| 4021   | C   | C   | . ASN ASN ASN B B 91 91 | . 0.1474 0.1494 0.1625 0.0036 -0.0182   |
| 0.0192 | 1   | .   |                         |                                         |
| 4022   | O   | O   | . ASN ASN ASN B B 91 91 | . 0.1593 0.1438 0.2033 0.0017 -0.0150   |
| 0.0094 | 1   | .   |                         |                                         |
| 4023   | N   | N   | . LEU LEU LEU B B 92 92 | . 0.1020 0.1523 0.1548 0.0055 -0.0121 - |
| 0.0003 | 1   | .   |                         |                                         |
| 4024   | CA  | CA  | . LEU LEU LEU B B 92 92 | . 0.1419 0.1394 0.1546 0.0151 -0.0066   |
| 0.0141 | 1   | .   |                         |                                         |
| 4025   | CB  | CB  | . LEU LEU LEU B B 92 92 | . 0.1293 0.1485 0.1745 0.0068 0.0105    |
| 0.0108 | 1   | .   |                         |                                         |
| 4026   | CG  | CG  | . LEU LEU LEU B B 92 92 | . 0.1978 0.1743 0.1977 0.0156 0.0203    |
| 0.0309 | 1   | .   |                         |                                         |
| 4027   | CD1 | CD1 | . LEU LEU LEU B B 92 92 | . 0.2037 0.1873 0.3237 0.0258 0.0166    |
| 0.0040 | 1   | .   |                         |                                         |
| 4028   | CD2 | CD2 | . LEU LEU LEU B B 92 92 | . 0.1070 0.1378 0.1916 -0.0088 0.0280   |
| 0.0117 | 1   | .   |                         |                                         |
| 4029   | C   | C   | . LEU LEU LEU B B 92 92 | . 0.1358 0.1469 0.1833 0.0116 0.0124    |
| 0.0086 | 1   | .   |                         |                                         |
| 4030   | O   | O   | . LEU LEU LEU B B 92 92 | . 0.1374 0.1382 0.1679 0.0123 0.0013    |
| 0.0007 | 1   | .   |                         |                                         |
| 4031   | N   | N   | . MET MET MET B B 93 93 | . 0.0996 0.1442 0.1480 0.0220 0.0073    |
| 0.0186 | 1   | .   |                         |                                         |
| 4032   | CA  | CA  | . MET MET MET B B 93 93 | . 0.1074 0.1120 0.1453 0.0175 -0.0077   |
| 0.0089 | 1   | .   |                         |                                         |
| 4033   | CB  | CB  | . MET MET MET B B 93 93 | . 0.1118 0.1250 0.1311 0.0358 0.0165    |
| 0.0151 | 1   | .   |                         |                                         |
| 4034   | CG  | CG  | . MET MET MET B B 93 93 | . 0.1177 0.1273 0.1500 0.0349 0.0008    |
| 0.0079 | 1   | .   |                         |                                         |
| 4035   | SD  | SD  | . MET MET MET B B 93 93 | . 0.1270 0.1581 0.1564 0.0302 -0.0022   |
| 0.0084 | 1   | .   |                         |                                         |
| 4036   | CE  | CE  | . MET MET MET B B 93 93 | . 0.1412 0.1539 0.1905 0.0480 -0.0115 - |
| 0.0133 | 1   | .   |                         |                                         |
| 4037   | C   | C   | . MET MET MET B B 93 93 | . 0.1188 0.1427 0.1339 0.0076 -0.0009 - |
| 0.0055 | 1   | .   |                         |                                         |
| 4038   | O   | O   | . MET MET MET B B 93 93 | . 0.1375 0.1222 0.1396 0.0067 0.0050 -  |
| 0.0147 | 1   | .   |                         |                                         |
| 4039   | N   | N   | . LEU LEU LEU B B 94 94 | . 0.1107 0.1239 0.1329 0.0392 0.0065    |
| 0.0117 | 1   | .   |                         |                                         |
| 4040   | CA  | CA  | . LEU LEU LEU B B 94 94 | . 0.1458 0.1321 0.1569 0.0353 0.0143    |
| 0.0063 | 1   | .   |                         |                                         |
| 4041   | CB  | CB  | . LEU LEU LEU B B 94 94 | . 0.1259 0.1433 0.1607 0.0541 0.0304 -  |
| 0.0313 | 1   | .   |                         |                                         |
| 4042   | CG  | CG  | . LEU LEU LEU B B 94 94 | . 0.2655 0.2251 0.1829 0.1120 -0.0052 - |
| 0.0127 | 1   | .   |                         |                                         |



|        |     |     |                             |        |        |        |         |         |   |
|--------|-----|-----|-----------------------------|--------|--------|--------|---------|---------|---|
| 4073   | CA  | CA  | . GLY GLY GLY B B 98 98 .   | 0.1817 | 0.1875 | 0.1922 | 0.0041  | 0.0016  |   |
| 0.0297 | 1   | .   |                             |        |        |        |         |         |   |
| 4074   | C   | C   | . GLY GLY GLY B B 98 98 .   | 0.1752 | 0.1852 | 0.1907 | 0.0216  | 0.0078  |   |
| 0.0275 | 1   | .   |                             |        |        |        |         |         |   |
| 4075   | O   | O   | . GLY GLY GLY B B 98 98 .   | 0.1863 | 0.1812 | 0.2383 | 0.0339  | -0.0096 |   |
| 0.0570 | 1   | .   |                             |        |        |        |         |         |   |
| 4076   | N   | N   | . THR THR THR B B 99 99 .   | 0.1262 | 0.1517 | 0.1569 | 0.0271  | 0.0106  |   |
| 0.0080 | 1   | .   |                             |        |        |        |         |         |   |
| 4077   | CA  | CA  | . THR THR THR B B 99 99 .   | 0.1785 | 0.1692 | 0.1735 | 0.0201  | 0.0079  |   |
| 0.0092 | 1   | .   |                             |        |        |        |         |         |   |
| 4078   | CB  | CB  | . THR THR THR B B 99 99 .   | 0.1610 | 0.1757 | 0.1775 | 0.0226  | 0.0092  | - |
| 0.0122 | 1   | .   |                             |        |        |        |         |         |   |
| 4079   | OG1 | OG1 | . THR THR THR B B 99 99 .   | 0.1722 | 0.1727 | 0.2197 | 0.0191  | 0.0300  |   |
| 0.0329 | 1   | .   |                             |        |        |        |         |         |   |
| 4080   | CG2 | CG2 | . THR THR THR B B 99 99 .   | 0.1971 | 0.1806 | 0.1480 | 0.0271  | 0.0230  | - |
| 0.0171 | 1   | .   |                             |        |        |        |         |         |   |
| 4081   | C   | C   | . THR THR THR B B 99 99 .   | 0.1720 | 0.1852 | 0.1976 | 0.0299  | 0.0155  |   |
| 0.0021 | 1   | .   |                             |        |        |        |         |         |   |
| 4082   | O   | O   | . THR THR THR B B 99 99 .   | 0.2267 | 0.1854 | 0.2260 | 0.0106  | 0.0639  |   |
| 0.0041 | 1   | .   |                             |        |        |        |         |         |   |
| 4083   | N   | N   | . GLU GLU GLU B B 100 100 . | 0.1799 | 0.1746 | 0.1742 | 0.0418  | 0.0098  |   |
| 0.0128 | 1   | .   |                             |        |        |        |         |         |   |
| 4084   | CA  | CA  | . GLU GLU GLU B B 100 100 . | 0.1916 | 0.1971 | 0.1910 | 0.0483  | 0.0174  |   |
| 0.0028 | 1   | .   |                             |        |        |        |         |         |   |
| 4085   | CB  | CB  | . GLU GLU GLU B B 100 100 . | 0.2183 | 0.2084 | 0.1937 | 0.0500  | -0.0105 |   |
| 0.0293 | 1   | .   |                             |        |        |        |         |         |   |
| 4086   | CG  | CG  | . GLU GLU GLU B B 100 100 . | 0.2950 | 0.3533 | 0.2767 | 0.0558  | 0.0424  | - |
| 0.0148 | 1   | .   |                             |        |        |        |         |         |   |
| 4087   | CD  | CD  | . GLU GLU GLU B B 100 100 . | 0.3607 | 0.4702 | 0.4185 | 0.0390  | -0.0263 | - |
| 0.0209 | 1   | .   |                             |        |        |        |         |         |   |
| 4088   | OE1 | OE1 | . GLU GLU GLU B B 100 100 . | 0.3802 | 0.5469 | 0.4810 | 0.0555  | -0.0190 |   |
| 0.0014 | 1   | .   |                             |        |        |        |         |         |   |
| 4089   | OE2 | OE2 | . GLU GLU GLU B B 100 100 . | 0.3702 | 0.5360 | 0.5323 | 0.0425  | -0.0030 | - |
| 0.0423 | 1   | .   |                             |        |        |        |         |         |   |
| 4090   | C   | C   | . GLU GLU GLU B B 100 100 . | 0.1731 | 0.1623 | 0.1605 | 0.0268  | 0.0098  |   |
| 0.0108 | 1   | .   |                             |        |        |        |         |         |   |
| 4091   | O   | O   | . GLU GLU GLU B B 100 100 . | 0.1678 | 0.1894 | 0.1753 | 0.0328  | 0.0179  | - |
| 0.0239 | 1   | .   |                             |        |        |        |         |         |   |
| 4092   | N   | N   | . ASN ASN ASN B B 101 101 . | 0.1413 | 0.1860 | 0.1652 | 0.0531  | -0.0105 |   |
| 0.0164 | 1   | .   |                             |        |        |        |         |         |   |
| 4093   | CA  | CA  | . ASN ASN ASN B B 101 101 . | 0.1291 | 0.1516 | 0.1612 | 0.0478  | -0.0085 |   |
| 0.0152 | 1   | .   |                             |        |        |        |         |         |   |
| 4094   | CB  | CB  | . ASN ASN ASN B B 101 101 . | 0.1694 | 0.2257 | 0.2116 | 0.0211  | -0.0006 |   |
| 0.0127 | 1   | .   |                             |        |        |        |         |         |   |
| 4095   | CG  | CG  | . ASN ASN ASN B B 101 101 . | 0.2794 | 0.2910 | 0.3024 | -0.0094 | -0.0052 |   |
| 0.0152 | 1   | .   |                             |        |        |        |         |         |   |
| 4096   | OD1 | OD1 | . ASN ASN ASN B B 101 101 . | 0.3907 | 0.5239 | 0.4484 | -0.0553 | -0.0394 | - |
| 0.0112 | 1   | .   |                             |        |        |        |         |         |   |
| 4097   | ND2 | ND2 | . ASN ASN ASN B B 101 101 . | 0.2911 | 0.4649 | 0.4039 | -0.1246 | 0.1290  | - |
| 0.0537 | 1   | .   |                             |        |        |        |         |         |   |
| 4098   | C   | C   | . ASN ASN ASN B B 101 101 . | 0.1312 | 0.1596 | 0.1589 | 0.0092  | 0.0155  |   |
| 0.0022 | 1   | .   |                             |        |        |        |         |         |   |
| 4099   | O   | O   | . ASN ASN ASN B B 101 101 . | 0.1339 | 0.1333 | 0.1658 | 0.0219  | 0.0098  | - |
| 0.0093 | 1   | .   |                             |        |        |        |         |         |   |
| 4100   | N   | N   | . LYS LYS LYS B B 102 102 . | 0.1269 | 0.1104 | 0.1298 | 0.0209  | 0.0315  |   |
| 0.0092 | 1   | .   |                             |        |        |        |         |         |   |
| 4101   | CA  | CA  | . LYS LYS LYS B B 102 102 . | 0.1267 | 0.0977 | 0.1029 | 0.0197  | -0.0069 |   |
| 0.0102 | 1   | .   |                             |        |        |        |         |         |   |
| 4102   | CB  | CB  | . LYS LYS LYS B B 102 102 . | 0.1101 | 0.1072 | 0.1088 | 0.0123  | 0.0138  |   |
| 0.0209 | 1   | .   |                             |        |        |        |         |         |   |





|        |     |     |                             |        |        |        |         |         |   |
|--------|-----|-----|-----------------------------|--------|--------|--------|---------|---------|---|
| 4133   | C   | C   | . PHE PHE PHE B B 105 105 . | 0.1385 | 0.1467 | 0.1481 | 0.0312  | 0.0097  |   |
| 0.0070 | 1   | .   |                             |        |        |        |         |         |   |
| 4134   | O   | O   | . PHE PHE PHE B B 105 105 . | 0.1455 | 0.1521 | 0.1486 | 0.0156  | 0.0028  |   |
| 0.0184 | 1   | .   |                             |        |        |        |         |         |   |
| 4135   | N   | N   | . GLY GLY GLY B B 106 106 . | 0.0987 | 0.1146 | 0.1358 | 0.0184  | 0.0159  | - |
| 0.0062 | 1   | .   |                             |        |        |        |         |         |   |
| 4136   | CA  | CA  | . GLY GLY GLY B B 106 106 . | 0.0971 | 0.1085 | 0.1475 | 0.0400  | 0.0174  |   |
| 0.0043 | 1   | .   |                             |        |        |        |         |         |   |
| 4137   | C   | C   | . GLY GLY GLY B B 106 106 . | 0.1097 | 0.1298 | 0.1002 | 0.0049  | 0.0074  | - |
| 0.0017 | 1   | .   |                             |        |        |        |         |         |   |
| 4138   | O   | O   | . GLY GLY GLY B B 106 106 . | 0.1083 | 0.1180 | 0.1270 | 0.0219  | 0.0059  | - |
| 0.0065 | 1   | .   |                             |        |        |        |         |         |   |
| 4139   | N   | N   | . ALA ALA ALA B B 107 107 . | 0.1065 | 0.1123 | 0.1182 | 0.0295  | 0.0009  |   |
| 0.0114 | 1   | .   |                             |        |        |        |         |         |   |
| 4140   | CA  | CA  | . ALA ALA ALA B B 107 107 . | 0.1082 | 0.1309 | 0.0987 | 0.0077  | 0.0136  |   |
| 0.0052 | 1   | .   |                             |        |        |        |         |         |   |
| 4141   | CB  | CB  | . ALA ALA ALA B B 107 107 . | 0.0935 | 0.1378 | 0.0892 | 0.0078  | 0.0425  |   |
| 0.0324 | 1   | .   |                             |        |        |        |         |         |   |
| 4142   | C   | C   | . ALA ALA ALA B B 107 107 . | 0.1194 | 0.1093 | 0.1300 | 0.0060  | -0.0066 |   |
| 0.0055 | 1   | .   |                             |        |        |        |         |         |   |
| 4143   | O   | O   | . ALA ALA ALA B B 107 107 . | 0.1241 | 0.1116 | 0.1268 | 0.0048  | -0.0088 |   |
| 0.0054 | 1   | .   |                             |        |        |        |         |         |   |
| 4144   | N   | N   | . ASN ASN ASN B B 108 108 . | 0.1064 | 0.1045 | 0.0957 | 0.0189  | 0.0126  |   |
| 0.0118 | 1   | .   |                             |        |        |        |         |         |   |
| 4145   | CA  | CA  | . ASN ASN ASN B B 108 108 . | 0.1063 | 0.1130 | 0.0999 | 0.0087  | 0.0021  |   |
| 0.0157 | 1   | .   |                             |        |        |        |         |         |   |
| 4146   | CB  | CB  | . ASN ASN ASN B B 108 108 . | 0.0881 | 0.0768 | 0.1350 | 0.0013  | -0.0141 |   |
| 0.0000 | 1   | .   |                             |        |        |        |         |         |   |
| 4147   | CG  | CG  | . ASN ASN ASN B B 108 108 . | 0.1325 | 0.1129 | 0.1374 | 0.0019  | 0.0035  |   |
| 0.0031 | 1   | .   |                             |        |        |        |         |         |   |
| 4148   | OD1 | OD1 | . ASN ASN ASN B B 108 108 . | 0.1270 | 0.1236 | 0.1302 | 0.0266  | -0.0139 | - |
| 0.0058 | 1   | .   |                             |        |        |        |         |         |   |
| 4149   | ND2 | ND2 | . ASN ASN ASN B B 108 108 . | 0.1173 | 0.1018 | 0.1217 | 0.0027  | 0.0000  |   |
| 0.0044 | 1   | .   |                             |        |        |        |         |         |   |
| 4150   | C   | C   | . ASN ASN ASN B B 108 108 . | 0.0892 | 0.1039 | 0.1420 | 0.0139  | 0.0138  |   |
| 0.0089 | 1   | .   |                             |        |        |        |         |         |   |
| 4151   | O   | O   | . ASN ASN ASN B B 108 108 . | 0.1168 | 0.1268 | 0.1560 | 0.0090  | 0.0291  |   |
| 0.0512 | 1   | .   |                             |        |        |        |         |         |   |
| 4152   | N   | N   | . ALA ALA ALA B B 109 109 . | 0.1028 | 0.1027 | 0.1068 | 0.0078  | 0.0188  |   |
| 0.0044 | 1   | .   |                             |        |        |        |         |         |   |
| 4153   | CA  | CA  | . ALA ALA ALA B B 109 109 . | 0.0950 | 0.0909 | 0.0936 | 0.0075  | 0.0045  |   |
| 0.0054 | 1   | .   |                             |        |        |        |         |         |   |
| 4154   | CB  | CB  | . ALA ALA ALA B B 109 109 . | 0.1034 | 0.0898 | 0.1246 | 0.0167  | 0.0049  | - |
| 0.0031 | 1   | .   |                             |        |        |        |         |         |   |
| 4155   | C   | C   | . ALA ALA ALA B B 109 109 . | 0.1047 | 0.1063 | 0.1111 | 0.0048  | -0.0004 |   |
| 0.0129 | 1   | .   |                             |        |        |        |         |         |   |
| 4156   | O   | O   | . ALA ALA ALA B B 109 109 . | 0.1169 | 0.1262 | 0.1344 | -0.0024 | -0.0127 |   |
| 0.0189 | 1   | .   |                             |        |        |        |         |         |   |
| 4157   | N   | N   | . ILE ILE ILE B B 110 110 . | 0.0919 | 0.1044 | 0.0990 | 0.0096  | -0.0017 | - |
| 0.0010 | 1   | .   |                             |        |        |        |         |         |   |
| 4158   | CA  | CA  | . ILE ILE ILE B B 110 110 . | 0.1183 | 0.0981 | 0.0809 | 0.0042  | -0.0105 |   |
| 0.0132 | 1   | .   |                             |        |        |        |         |         |   |
| 4159   | CB  | CB  | . ILE ILE ILE B B 110 110 . | 0.1345 | 0.1300 | 0.0879 | 0.0330  | -0.0040 |   |
| 0.0062 | 1   | .   |                             |        |        |        |         |         |   |
| 4160   | CG1 | CG1 | . ILE ILE ILE B B 110 110 . | 0.1268 | 0.1035 | 0.1312 | 0.0458  | -0.0105 |   |
| 0.0076 | 1   | .   |                             |        |        |        |         |         |   |
| 4161   | CD  | CD  | . ILE ILE ILE B B 110 110 . | 0.1731 | 0.1257 | 0.1825 | 0.0559  | -0.0016 |   |
| 0.0342 | 1   | .   |                             |        |        |        |         |         |   |
| 4162   | CG2 | CG2 | . ILE ILE ILE B B 110 110 . | 0.0966 | 0.1257 | 0.1147 | -0.0065 | -0.0145 |   |
| 0.0031 | 1   | .   |                             |        |        |        |         |         |   |

|        |     |     |                             |        |        |        |         |         |   |
|--------|-----|-----|-----------------------------|--------|--------|--------|---------|---------|---|
| 4163   | C   | C   | . ILE ILE ILE B B 110 110 . | 0.0968 | 0.1063 | 0.0961 | 0.0087  | 0.0042  |   |
| 0.0103 | 1   | .   |                             |        |        |        |         |         |   |
| 4164   | O   | O   | . ILE ILE ILE B B 110 110 . | 0.1117 | 0.1241 | 0.1310 | 0.0153  | -0.0066 |   |
| 0.0120 | 1   | .   |                             |        |        |        |         |         |   |
| 4165   | N   | N   | . LEU LEU LEU B B 111 111 . | 0.1000 | 0.1126 | 0.1036 | 0.0100  | 0.0108  | - |
| 0.0027 | 1   | .   |                             |        |        |        |         |         |   |
| 4166   | CA  | CA  | . LEU LEU LEU B B 111 111 . | 0.0849 | 0.0847 | 0.1202 | -0.0021 | 0.0196  |   |
| 0.0156 | 1   | .   |                             |        |        |        |         |         |   |
| 4167   | CB  | CB  | . LEU LEU LEU B B 111 111 . | 0.0810 | 0.0937 | 0.1182 | 0.0007  | 0.0255  | - |
| 0.0033 | 1   | .   |                             |        |        |        |         |         |   |
| 4168   | CG  | CG  | . LEU LEU LEU B B 111 111 . | 0.0724 | 0.1010 | 0.1013 | 0.0091  | -0.0090 | - |
| 0.0208 | 1   | .   |                             |        |        |        |         |         |   |
| 4169   | CD1 | CD1 | . LEU LEU LEU B B 111 111 . | 0.0745 | 0.1120 | 0.1311 | 0.0196  | -0.0288 | - |
| 0.0218 | 1   | .   |                             |        |        |        |         |         |   |
| 4170   | CD2 | CD2 | . LEU LEU LEU B B 111 111 . | 0.1088 | 0.1222 | 0.1673 | 0.0026  | 0.0444  |   |
| 0.0061 | 1   | .   |                             |        |        |        |         |         |   |
| 4171   | C   | C   | . LEU LEU LEU B B 111 111 . | 0.0983 | 0.1095 | 0.1037 | 0.0055  | 0.0270  | - |
| 0.0077 | 1   | .   |                             |        |        |        |         |         |   |
| 4172   | O   | O   | . LEU LEU LEU B B 111 111 . | 0.0859 | 0.1164 | 0.1236 | 0.0086  | 0.0106  | - |
| 0.0027 | 1   | .   |                             |        |        |        |         |         |   |
| 4173   | N   | N   | . GLY GLY GLY B B 112 112 . | 0.1065 | 0.1320 | 0.1239 | 0.0136  | 0.0106  |   |
| 0.0203 | 1   | .   |                             |        |        |        |         |         |   |
| 4174   | CA  | CA  | . GLY GLY GLY B B 112 112 . | 0.1040 | 0.1326 | 0.1244 | 0.0223  | 0.0118  |   |
| 0.0441 | 1   | .   |                             |        |        |        |         |         |   |
| 4175   | C   | C   | . GLY GLY GLY B B 112 112 . | 0.1310 | 0.1275 | 0.1230 | 0.0129  | 0.0178  |   |
| 0.0132 | 1   | .   |                             |        |        |        |         |         |   |
| 4176   | O   | O   | . GLY GLY GLY B B 112 112 . | 0.1042 | 0.1238 | 0.1360 | 0.0091  | 0.0105  |   |
| 0.0224 | 1   | .   |                             |        |        |        |         |         |   |
| 4177   | N   | N   | . VAL VAL VAL B B 113 113 . | 0.1060 | 0.1307 | 0.1015 | 0.0116  | -0.0066 |   |
| 0.0205 | 1   | .   |                             |        |        |        |         |         |   |
| 4178   | CA  | CA  | . VAL VAL VAL B B 113 113 . | 0.0789 | 0.1188 | 0.1268 | 0.0110  | 0.0018  | - |
| 0.0057 | 1   | .   |                             |        |        |        |         |         |   |
| 4179   | CB  | CB  | . VAL VAL VAL B B 113 113 . | 0.0835 | 0.1020 | 0.1166 | 0.0238  | 0.0001  | - |
| 0.0035 | 1   | .   |                             |        |        |        |         |         |   |
| 4180   | CG1 | CG1 | . VAL VAL VAL B B 113 113 . | 0.0998 | 0.1299 | 0.1339 | -0.0233 | -0.0078 |   |
| 0.0115 | 1   | .   |                             |        |        |        |         |         |   |
| 4181   | CG2 | CG2 | . VAL VAL VAL B B 113 113 . | 0.0555 | 0.1380 | 0.1421 | 0.0026  | 0.0045  | - |
| 0.0141 | 1   | .   |                             |        |        |        |         |         |   |
| 4182   | C   | C   | . VAL VAL VAL B B 113 113 . | 0.1147 | 0.1289 | 0.1109 | 0.0080  | 0.0091  |   |
| 0.0123 | 1   | .   |                             |        |        |        |         |         |   |
| 4183   | O   | O   | . VAL VAL VAL B B 113 113 . | 0.1198 | 0.1239 | 0.1196 | -0.0075 | 0.0033  |   |
| 0.0133 | 1   | .   |                             |        |        |        |         |         |   |
| 4184   | N   | N   | . SER SER SER B B 114 114 . | 0.0811 | 0.1204 | 0.0996 | 0.0147  | 0.0077  |   |
| 0.0112 | 1   | .   |                             |        |        |        |         |         |   |
| 4185   | CA  | CA  | . SER SER SER B B 114 114 . | 0.0990 | 0.0988 | 0.1060 | 0.0045  | 0.0067  | - |
| 0.0030 | 1   | .   |                             |        |        |        |         |         |   |
| 4186   | CB  | CB  | . SER SER SER B B 114 114 . | 0.1152 | 0.1116 | 0.0792 | -0.0026 | -0.0212 |   |
| 0.0195 | 1   | .   |                             |        |        |        |         |         |   |
| 4187   | OG  | OG  | . SER SER SER B B 114 114 . | 0.1266 | 0.1210 | 0.1112 | -0.0062 | -0.0265 | - |
| 0.0024 | 1   | .   |                             |        |        |        |         |         |   |
| 4188   | C   | C   | . SER SER SER B B 114 114 . | 0.1034 | 0.1155 | 0.1169 | 0.0078  | -0.0034 | - |
| 0.0058 | 1   | .   |                             |        |        |        |         |         |   |
| 4189   | O   | O   | . SER SER SER B B 114 114 . | 0.1002 | 0.1058 | 0.1215 | 0.0075  | -0.0113 |   |
| 0.0187 | 1   | .   |                             |        |        |        |         |         |   |
| 4190   | N   | N   | . LEU LEU LEU B B 115 115 . | 0.1107 | 0.1157 | 0.1011 | 0.0137  | 0.0102  |   |
| 0.0330 | 1   | .   |                             |        |        |        |         |         |   |
| 4191   | CA  | CA  | . LEU LEU LEU B B 115 115 . | 0.0775 | 0.0951 | 0.1359 | -0.0026 | -0.0038 |   |
| 0.0404 | 1   | .   |                             |        |        |        |         |         |   |
| 4192   | CB  | CB  | . LEU LEU LEU B B 115 115 . | 0.0842 | 0.1183 | 0.1477 | -0.0069 | -0.0029 |   |
| 0.0344 | 1   | .   |                             |        |        |        |         |         |   |

|        |     |     |                             |        |        |        |         |         |   |
|--------|-----|-----|-----------------------------|--------|--------|--------|---------|---------|---|
| 4193   | CG  | CG  | . LEU LEU LEU B B 115 115 . | 0.1199 | 0.1193 | 0.0883 | -0.0249 | 0.0122  |   |
| 0.0172 | 1   | .   |                             |        |        |        |         |         |   |
| 4194   | CD1 | CD1 | . LEU LEU LEU B B 115 115 . | 0.1327 | 0.1514 | 0.1587 | -0.0188 | 0.0017  |   |
| 0.0489 | 1   | .   |                             |        |        |        |         |         |   |
| 4195   | CD2 | CD2 | . LEU LEU LEU B B 115 115 . | 0.1323 | 0.1374 | 0.1355 | 0.0046  | 0.0188  |   |
| 0.0041 | 1   | .   |                             |        |        |        |         |         |   |
| 4196   | C   | C   | . LEU LEU LEU B B 115 115 . | 0.0920 | 0.1206 | 0.1181 | 0.0045  | -0.0080 |   |
| 0.0140 | 1   | .   |                             |        |        |        |         |         |   |
| 4197   | O   | O   | . LEU LEU LEU B B 115 115 . | 0.1112 | 0.1278 | 0.1435 | 0.0089  | -0.0016 |   |
| 0.0260 | 1   | .   |                             |        |        |        |         |         |   |
| 4198   | N   | N   | . ALA ALA ALA B B 116 116 . | 0.0868 | 0.1208 | 0.1184 | 0.0007  | 0.0031  |   |
| 0.0262 | 1   | .   |                             |        |        |        |         |         |   |
| 4199   | CA  | CA  | . ALA ALA ALA B B 116 116 . | 0.1132 | 0.1023 | 0.1133 | -0.0026 | -0.0012 |   |
| 0.0176 | 1   | .   |                             |        |        |        |         |         |   |
| 4200   | CB  | CB  | . ALA ALA ALA B B 116 116 . | 0.1247 | 0.1679 | 0.1125 | -0.0091 | -0.0072 | - |
| 0.0047 | 1   | .   |                             |        |        |        |         |         |   |
| 4201   | C   | C   | . ALA ALA ALA B B 116 116 . | 0.1303 | 0.1224 | 0.1243 | 0.0039  | 0.0022  |   |
| 0.0153 | 1   | .   |                             |        |        |        |         |         |   |
| 4202   | O   | O   | . ALA ALA ALA B B 116 116 . | 0.1239 | 0.1209 | 0.1407 | 0.0024  | 0.0044  |   |
| 0.0013 | 1   | .   |                             |        |        |        |         |         |   |
| 4203   | N   | N   | . VAL VAL VAL B B 117 117 . | 0.0970 | 0.1145 | 0.1345 | 0.0147  | 0.0054  |   |
| 0.0125 | 1   | .   |                             |        |        |        |         |         |   |
| 4204   | CA  | CA  | . VAL VAL VAL B B 117 117 . | 0.1002 | 0.1089 | 0.1286 | -0.0001 | -0.0197 |   |
| 0.0077 | 1   | .   |                             |        |        |        |         |         |   |
| 4205   | CB  | CB  | . VAL VAL VAL B B 117 117 . | 0.1022 | 0.1279 | 0.1184 | 0.0114  | -0.0109 |   |
| 0.0127 | 1   | .   |                             |        |        |        |         |         |   |
| 4206   | CG1 | CG1 | . VAL VAL VAL B B 117 117 . | 0.1124 | 0.1418 | 0.1542 | 0.0459  | -0.0256 |   |
| 0.0092 | 1   | .   |                             |        |        |        |         |         |   |
| 4207   | CG2 | CG2 | . VAL VAL VAL B B 117 117 . | 0.1467 | 0.1292 | 0.1352 | 0.0095  | 0.0229  | - |
| 0.0094 | 1   | .   |                             |        |        |        |         |         |   |
| 4208   | C   | C   | . VAL VAL VAL B B 117 117 . | 0.0973 | 0.1304 | 0.1242 | -0.0034 | 0.0006  |   |
| 0.0066 | 1   | .   |                             |        |        |        |         |         |   |
| 4209   | O   | O   | . VAL VAL VAL B B 117 117 . | 0.1278 | 0.1333 | 0.1625 | -0.0027 | 0.0052  |   |
| 0.0160 | 1   | .   |                             |        |        |        |         |         |   |
| 4210   | N   | N   | . CYS CYS CYS B B 118 118 . | 0.0853 | 0.1121 | 0.0999 | 0.0037  | 0.0075  |   |
| 0.0063 | 1   | .   |                             |        |        |        |         |         |   |
| 4211   | CA  | CA  | . CYS CYS CYS B B 118 118 . | 0.1093 | 0.1087 | 0.1198 | -0.0068 | 0.0083  |   |
| 0.0080 | 1   | .   |                             |        |        |        |         |         |   |
| 4212   | CB  | CB  | . CYS CYS CYS B B 118 118 . | 0.1177 | 0.1626 | 0.1318 | -0.0122 | 0.0118  | - |
| 0.0015 | 1   | .   |                             |        |        |        |         |         |   |
| 4213   | SG  | SG  | . CYS CYS CYS B B 118 118 . | 0.1497 | 0.1474 | 0.1617 | -0.0021 | 0.0097  |   |
| 0.0069 | 1   | .   |                             |        |        |        |         |         |   |
| 4214   | C   | C   | . CYS CYS CYS B B 118 118 . | 0.1188 | 0.1276 | 0.1313 | -0.0051 | -0.0032 | - |
| 0.0048 | 1   | .   |                             |        |        |        |         |         |   |
| 4215   | O   | O   | . CYS CYS CYS B B 118 118 . | 0.1191 | 0.1337 | 0.1360 | -0.0104 | -0.0003 |   |
| 0.0116 | 1   | .   |                             |        |        |        |         |         |   |
| 4216   | N   | N   | . LYS LYS LYS B B 119 119 . | 0.1132 | 0.1290 | 0.1194 | 0.0012  | -0.0019 |   |
| 0.0225 | 1   | .   |                             |        |        |        |         |         |   |
| 4217   | CA  | CA  | . LYS LYS LYS B B 119 119 . | 0.1113 | 0.1254 | 0.1318 | -0.0022 | 0.0155  |   |
| 0.0241 | 1   | .   |                             |        |        |        |         |         |   |
| 4218   | CB  | CB  | . LYS LYS LYS B B 119 119 . | 0.1235 | 0.1373 | 0.1495 | 0.0087  | 0.0100  |   |
| 0.0122 | 1   | .   |                             |        |        |        |         |         |   |
| 4219   | CG  | CG  | . LYS LYS LYS B B 119 119 . | 0.1358 | 0.1066 | 0.1408 | 0.0159  | 0.0071  |   |
| 0.0015 | 1   | .   |                             |        |        |        |         |         |   |
| 4220   | CD  | CD  | . LYS LYS LYS B B 119 119 . | 0.1385 | 0.1596 | 0.1410 | -0.0243 | 0.0120  |   |
| 0.0018 | 1   | .   |                             |        |        |        |         |         |   |
| 4221   | CE  | CE  | . LYS LYS LYS B B 119 119 . | 0.1052 | 0.2470 | 0.1857 | -0.0177 | -0.0126 | - |
| 0.0107 | 1   | .   |                             |        |        |        |         |         |   |
| 4222   | NZ  | NZ  | . LYS LYS LYS B B 119 119 . | 0.1557 | 0.2570 | 0.1883 | 0.0095  | -0.0266 | - |
| 0.0666 | 1   | .   |                             |        |        |        |         |         |   |

|        |     |     |                             |        |        |        |         |         |   |
|--------|-----|-----|-----------------------------|--------|--------|--------|---------|---------|---|
| 4223   | C   | C   | . LYS LYS LYS B B 119 119 . | 0.1048 | 0.1319 | 0.1573 | -0.0006 | 0.0189  | - |
| 0.0027 | 1   | .   |                             |        |        |        |         |         |   |
| 4224   | O   | O   | . LYS LYS LYS B B 119 119 . | 0.1299 | 0.1347 | 0.1833 | -0.0113 | 0.0129  |   |
| 0.0141 | 1   | .   |                             |        |        |        |         |         |   |
| 4225   | N   | N   | . ALA ALA ALA B B 120 120 . | 0.1424 | 0.1309 | 0.1669 | -0.0082 | 0.0383  |   |
| 0.0034 | 1   | .   |                             |        |        |        |         |         |   |
| 4226   | CA  | CA  | . ALA ALA ALA B B 120 120 . | 0.1293 | 0.1317 | 0.1505 | -0.0048 | 0.0069  |   |
| 0.0016 | 1   | .   |                             |        |        |        |         |         |   |
| 4227   | CB  | CB  | . ALA ALA ALA B B 120 120 . | 0.1357 | 0.1221 | 0.1304 | 0.0029  | 0.0399  | - |
| 0.0005 | 1   | .   |                             |        |        |        |         |         |   |
| 4228   | C   | C   | . ALA ALA ALA B B 120 120 . | 0.1502 | 0.1424 | 0.1359 | -0.0114 | 0.0104  |   |
| 0.0035 | 1   | .   |                             |        |        |        |         |         |   |
| 4229   | O   | O   | . ALA ALA ALA B B 120 120 . | 0.1471 | 0.1463 | 0.1654 | -0.0118 | 0.0171  | - |
| 0.0028 | 1   | .   |                             |        |        |        |         |         |   |
| 4230   | N   | N   | . GLY GLY GLY B B 121 121 . | 0.1300 | 0.1249 | 0.1258 | -0.0029 | -0.0029 |   |
| 0.0086 | 1   | .   |                             |        |        |        |         |         |   |
| 4231   | CA  | CA  | . GLY GLY GLY B B 121 121 . | 0.1141 | 0.1460 | 0.1436 | 0.0156  | 0.0077  | - |
| 0.0034 | 1   | .   |                             |        |        |        |         |         |   |
| 4232   | C   | C   | . GLY GLY GLY B B 121 121 . | 0.1332 | 0.1303 | 0.1527 | -0.0018 | -0.0151 |   |
| 0.0144 | 1   | .   |                             |        |        |        |         |         |   |
| 4233   | O   | O   | . GLY GLY GLY B B 121 121 . | 0.1228 | 0.1478 | 0.1711 | -0.0098 | 0.0032  |   |
| 0.0121 | 1   | .   |                             |        |        |        |         |         |   |
| 4234   | N   | N   | . ALA ALA ALA B B 122 122 . | 0.1121 | 0.1336 | 0.1611 | 0.0092  | 0.0192  |   |
| 0.0030 | 1   | .   |                             |        |        |        |         |         |   |
| 4235   | CA  | CA  | . ALA ALA ALA B B 122 122 . | 0.1133 | 0.1190 | 0.1662 | -0.0158 | 0.0091  |   |
| 0.0147 | 1   | .   |                             |        |        |        |         |         |   |
| 4236   | CB  | CB  | . ALA ALA ALA B B 122 122 . | 0.0948 | 0.1565 | 0.1976 | -0.0239 | 0.0228  | - |
| 0.0078 | 1   | .   |                             |        |        |        |         |         |   |
| 4237   | C   | C   | . ALA ALA ALA B B 122 122 . | 0.1471 | 0.1583 | 0.1554 | -0.0256 | 0.0182  |   |
| 0.0031 | 1   | .   |                             |        |        |        |         |         |   |
| 4238   | O   | O   | . ALA ALA ALA B B 122 122 . | 0.1624 | 0.1702 | 0.1648 | -0.0136 | 0.0029  | - |
| 0.0012 | 1   | .   |                             |        |        |        |         |         |   |
| 4239   | N   | N   | . ALA ALA ALA B B 123 123 . | 0.1606 | 0.1568 | 0.1497 | -0.0205 | 0.0134  |   |
| 0.0259 | 1   | .   |                             |        |        |        |         |         |   |
| 4240   | CA  | CA  | . ALA ALA ALA B B 123 123 . | 0.1448 | 0.1308 | 0.1454 | -0.0237 | 0.0006  |   |
| 0.0192 | 1   | .   |                             |        |        |        |         |         |   |
| 4241   | CB  | CB  | . ALA ALA ALA B B 123 123 . | 0.1691 | 0.1602 | 0.1647 | 0.0126  | -0.0217 |   |
| 0.0305 | 1   | .   |                             |        |        |        |         |         |   |
| 4242   | C   | C   | . ALA ALA ALA B B 123 123 . | 0.1528 | 0.1487 | 0.1994 | -0.0110 | 0.0037  |   |
| 0.0184 | 1   | .   |                             |        |        |        |         |         |   |
| 4243   | O   | O   | . ALA ALA ALA B B 123 123 . | 0.2163 | 0.1581 | 0.2116 | -0.0447 | 0.0283  |   |
| 0.0272 | 1   | .   |                             |        |        |        |         |         |   |
| 4244   | N   | N   | . GLU GLU GLU B B 124 124 . | 0.1545 | 0.1586 | 0.1948 | -0.0302 | 0.0015  | - |
| 0.0018 | 1   | .   |                             |        |        |        |         |         |   |
| 4245   | CA  | CA  | . GLU GLU GLU B B 124 124 . | 0.1594 | 0.1767 | 0.2149 | -0.0094 | -0.0021 |   |
| 0.0105 | 1   | .   |                             |        |        |        |         |         |   |
| 4246   | CB  | CB  | . GLU GLU GLU B B 124 124 . | 0.1606 | 0.1404 | 0.2418 | -0.0059 | -0.0032 |   |
| 0.0136 | 1   | .   |                             |        |        |        |         |         |   |
| 4247   | CG  | CG  | . GLU GLU GLU B B 124 124 . | 0.1954 | 0.2991 | 0.3112 | 0.0219  | 0.0262  |   |
| 0.0127 | 1   | .   |                             |        |        |        |         |         |   |
| 4248   | CD  | CD  | . GLU GLU GLU B B 124 124 . | 0.2789 | 0.3333 | 0.3466 | -0.0036 | -0.0173 |   |
| 0.0499 | 1   | .   |                             |        |        |        |         |         |   |
| 4249   | OE1 | OE1 | . GLU GLU GLU B B 124 124 . | 0.3202 | 0.2553 | 0.2780 | -0.0076 | 0.0450  |   |
| 0.0200 | 1   | .   |                             |        |        |        |         |         |   |
| 4250   | OE2 | OE2 | . GLU GLU GLU B B 124 124 . | 0.3065 | 0.4543 | 0.4483 | -0.0367 | 0.0242  | - |
| 0.0173 | 1   | .   |                             |        |        |        |         |         |   |
| 4251   | C   | C   | . GLU GLU GLU B B 124 124 . | 0.1529 | 0.1853 | 0.2258 | -0.0286 | 0.0148  | - |
| 0.0028 | 1   | .   |                             |        |        |        |         |         |   |
| 4252   | O   | O   | . GLU GLU GLU B B 124 124 . | 0.1644 | 0.2259 | 0.2843 | -0.0565 | 0.0209  |   |
| 0.0014 | 1   | .   |                             |        |        |        |         |         |   |

|        |     |     |                             |        |        |        |         |         |   |
|--------|-----|-----|-----------------------------|--------|--------|--------|---------|---------|---|
| 4253   | N   | N   | . ARG ARG ARG B B 125 125 . | 0.1864 | 0.1988 | 0.2178 | -0.0165 | 0.0164  |   |
| 0.0104 | 1   | .   |                             |        |        |        |         |         |   |
| 4254   | CA  | CA  | . ARG ARG ARG B B 125 125 . | 0.1777 | 0.2148 | 0.2111 | -0.0264 | 0.0167  |   |
| 0.0107 | 1   | .   |                             |        |        |        |         |         |   |
| 4255   | CB  | CB  | . ARG ARG ARG B B 125 125 . | 0.2034 | 0.2099 | 0.2465 | -0.0172 | 0.0308  |   |
| 0.0071 | 1   | .   |                             |        |        |        |         |         |   |
| 4256   | CG  | CG  | . ARG ARG ARG B B 125 125 . | 0.2304 | 0.2145 | 0.2703 | 0.0145  | 0.0239  |   |
| 0.0106 | 1   | .   |                             |        |        |        |         |         |   |
| 4257   | CD  | CD  | . ARG ARG ARG B B 125 125 . | 0.2175 | 0.2762 | 0.3747 | 0.0533  | -0.0178 |   |
| 0.0695 | 1   | .   |                             |        |        |        |         |         |   |
| 4258   | NE  | NE  | . ARG ARG ARG B B 125 125 . | 0.4678 | 0.3685 | 0.4093 | 0.0331  | 0.0018  |   |
| 0.0618 | 1   | .   |                             |        |        |        |         |         |   |
| 4259   | CZ  | CZ  | . ARG ARG ARG B B 125 125 . | 0.4727 | 0.4587 | 0.5042 | 0.0062  | -0.0295 |   |
| 0.0669 | 1   | .   |                             |        |        |        |         |         |   |
| 4260   | NH1 | NH1 | . ARG ARG ARG B B 125 125 . | 0.5126 | 0.5436 | 0.5496 | -0.0526 | -0.0422 |   |
| 0.0317 | 1   | .   |                             |        |        |        |         |         |   |
| 4261   | NH2 | NH2 | . ARG ARG ARG B B 125 125 . | 0.4591 | 0.4159 | 0.5010 | 0.0460  | -0.0582 |   |
| 0.0664 | 1   | .   |                             |        |        |        |         |         |   |
| 4262   | C   | C   | . ARG ARG ARG B B 125 125 . | 0.1752 | 0.2082 | 0.2120 | -0.0462 | 0.0354  |   |
| 0.0023 | 1   | .   |                             |        |        |        |         |         |   |
| 4263   | O   | O   | . ARG ARG ARG B B 125 125 . | 0.1913 | 0.2508 | 0.2620 | -0.0420 | -0.0023 | - |
| 0.0115 | 1   | .   |                             |        |        |        |         |         |   |
| 4264   | N   | N   | . GLU GLU GLU B B 126 126 . | 0.1913 | 0.2094 | 0.2407 | -0.0386 | 0.0208  |   |
| 0.0134 | 1   | .   |                             |        |        |        |         |         |   |
| 4265   | CA  | CA  | . GLU GLU GLU B B 126 126 . | 0.2099 | 0.2100 | 0.2693 | -0.0380 | 0.0225  |   |
| 0.0039 | 1   | .   |                             |        |        |        |         |         |   |
| 4266   | CB  | CB  | . GLU GLU GLU B B 126 126 . | 0.2529 | 0.2193 | 0.3057 | -0.0372 | 0.0282  | - |
| 0.0145 | 1   | .   |                             |        |        |        |         |         |   |
| 4267   | CG  | CG  | . GLU GLU GLU B B 126 126 . | 0.3144 | 0.3569 | 0.4056 | -0.0425 | 0.0347  |   |
| 0.0085 | 1   | .   |                             |        |        |        |         |         |   |
| 4268   | CD  | CD  | . GLU GLU GLU B B 126 126 . | 0.5001 | 0.4727 | 0.5360 | -0.0654 | -0.0007 |   |
| 0.0514 | 1   | .   |                             |        |        |        |         |         |   |
| 4269   | OE1 | OE1 | . GLU GLU GLU B B 126 126 . | 0.5969 | 0.6077 | 0.6318 | 0.0008  | -0.0436 |   |
| 0.0266 | 1   | .   |                             |        |        |        |         |         |   |
| 4270   | OE2 | OE2 | . GLU GLU GLU B B 126 126 . | 0.5152 | 0.5649 | 0.6140 | -0.1098 | -0.0161 |   |
| 0.0412 | 1   | .   |                             |        |        |        |         |         |   |
| 4271   | C   | C   | . GLU GLU GLU B B 126 126 . | 0.2352 | 0.2201 | 0.2670 | -0.0281 | 0.0168  | - |
| 0.0114 | 1   | .   |                             |        |        |        |         |         |   |
| 4272   | O   | O   | . GLU GLU GLU B B 126 126 . | 0.2590 | 0.1878 | 0.2932 | -0.0422 | 0.0388  | - |
| 0.0329 | 1   | .   |                             |        |        |        |         |         |   |
| 4273   | N   | N   | . LEU LEU LEU B B 127 127 . | 0.2042 | 0.1939 | 0.2318 | -0.0323 | 0.0254  |   |
| 0.0181 | 1   | .   |                             |        |        |        |         |         |   |
| 4274   | CA  | CA  | . LEU LEU LEU B B 127 127 . | 0.1865 | 0.2066 | 0.1999 | -0.0109 | 0.0057  |   |
| 0.0087 | 1   | .   |                             |        |        |        |         |         |   |
| 4275   | CB  | CB  | . LEU LEU LEU B B 127 127 . | 0.1712 | 0.2084 | 0.2059 | -0.0190 | 0.0009  |   |
| 0.0250 | 1   | .   |                             |        |        |        |         |         |   |
| 4276   | CG  | CG  | . LEU LEU LEU B B 127 127 . | 0.1998 | 0.2263 | 0.2459 | -0.0285 | -0.0112 | - |
| 0.0258 | 1   | .   |                             |        |        |        |         |         |   |
| 4277   | CD1 | CD1 | . LEU LEU LEU B B 127 127 . | 0.1618 | 0.2351 | 0.2437 | -0.0249 | -0.0232 |   |
| 0.0008 | 1   | .   |                             |        |        |        |         |         |   |
| 4278   | CD2 | CD2 | . LEU LEU LEU B B 127 127 . | 0.2091 | 0.2215 | 0.2952 | -0.0015 | -0.0465 | - |
| 0.0310 | 1   | .   |                             |        |        |        |         |         |   |
| 4279   | C   | C   | . LEU LEU LEU B B 127 127 . | 0.1799 | 0.1759 | 0.1889 | -0.0114 | 0.0179  |   |
| 0.0020 | 1   | .   |                             |        |        |        |         |         |   |
| 4280   | O   | O   | . LEU LEU LEU B B 127 127 . | 0.1792 | 0.1665 | 0.2171 | -0.0111 | 0.0271  |   |
| 0.0014 | 1   | .   |                             |        |        |        |         |         |   |
| 4281   | N   | N   | . PRO PRO PRO B B 128 128 . | 0.1619 | 0.1617 | 0.2117 | -0.0195 | 0.0003  |   |
| 0.0041 | 1   | .   |                             |        |        |        |         |         |   |
| 4282   | CA  | CA  | . PRO PRO PRO B B 128 128 . | 0.1548 | 0.1645 | 0.1956 | -0.0114 | -0.0076 |   |
| 0.0174 | 1   | .   |                             |        |        |        |         |         |   |

|        |     |     |                             |        |        |        |         |         |   |
|--------|-----|-----|-----------------------------|--------|--------|--------|---------|---------|---|
| 4283   | CB  | CB  | . PRO PRO PRO B B 128 128 . | 0.1701 | 0.1465 | 0.2101 | -0.0289 | 0.0212  | - |
| 0.0012 | 1   | .   |                             |        |        |        |         |         |   |
| 4284   | CG  | CG  | . PRO PRO PRO B B 128 128 . | 0.1919 | 0.2395 | 0.2214 | 0.0247  | -0.0134 | - |
| 0.0068 | 1   | .   |                             |        |        |        |         |         |   |
| 4285   | CD  | CD  | . PRO PRO PRO B B 128 128 . | 0.1612 | 0.1741 | 0.1769 | -0.0109 | -0.0174 | - |
| 0.0049 | 1   | .   |                             |        |        |        |         |         |   |
| 4286   | C   | C   | . PRO PRO PRO B B 128 128 . | 0.1668 | 0.1435 | 0.1523 | -0.0225 | -0.0194 |   |
| 0.0126 | 1   | .   |                             |        |        |        |         |         |   |
| 4287   | O   | O   | . PRO PRO PRO B B 128 128 . | 0.1190 | 0.1553 | 0.1752 | -0.0096 | -0.0045 |   |
| 0.0006 | 1   | .   |                             |        |        |        |         |         |   |
| 4288   | N   | N   | . LEU LEU LEU B B 129 129 . | 0.1014 | 0.1371 | 0.1811 | -0.0296 | -0.0079 |   |
| 0.0279 | 1   | .   |                             |        |        |        |         |         |   |
| 4289   | CA  | CA  | . LEU LEU LEU B B 129 129 . | 0.1288 | 0.1312 | 0.1651 | -0.0136 | -0.0025 |   |
| 0.0068 | 1   | .   |                             |        |        |        |         |         |   |
| 4290   | CB  | CB  | . LEU LEU LEU B B 129 129 . | 0.1680 | 0.1333 | 0.1527 | -0.0175 | -0.0244 |   |
| 0.0195 | 1   | .   |                             |        |        |        |         |         |   |
| 4291   | CG  | CG  | . LEU LEU LEU B B 129 129 . | 0.1304 | 0.1163 | 0.1585 | -0.0045 | -0.0177 |   |
| 0.0092 | 1   | .   |                             |        |        |        |         |         |   |
| 4292   | CD1 | CD1 | . LEU LEU LEU B B 129 129 . | 0.1562 | 0.1922 | 0.1906 | 0.0357  | -0.0248 | - |
| 0.0271 | 1   | .   |                             |        |        |        |         |         |   |
| 4293   | CD2 | CD2 | . LEU LEU LEU B B 129 129 . | 0.1525 | 0.1568 | 0.1196 | -0.0210 | -0.0415 | - |
| 0.0039 | 1   | .   |                             |        |        |        |         |         |   |
| 4294   | C   | C   | . LEU LEU LEU B B 129 129 . | 0.1206 | 0.1158 | 0.1412 | -0.0158 | -0.0078 |   |
| 0.0022 | 1   | .   |                             |        |        |        |         |         |   |
| 4295   | O   | O   | . LEU LEU LEU B B 129 129 . | 0.1170 | 0.1155 | 0.1430 | -0.0164 | -0.0155 |   |
| 0.0029 | 1   | .   |                             |        |        |        |         |         |   |
| 4296   | N   | N   | . TYR TYR TYR B B 130 130 . | 0.1268 | 0.1288 | 0.1487 | -0.0198 | 0.0119  | - |
| 0.0025 | 1   | .   |                             |        |        |        |         |         |   |
| 4297   | CA  | CA  | . TYR TYR TYR B B 130 130 . | 0.1415 | 0.1140 | 0.1333 | -0.0169 | -0.0140 | - |
| 0.0085 | 1   | .   |                             |        |        |        |         |         |   |
| 4298   | CB  | CB  | . TYR TYR TYR B B 130 130 . | 0.1569 | 0.1240 | 0.1724 | -0.0082 | -0.0015 |   |
| 0.0136 | 1   | .   |                             |        |        |        |         |         |   |
| 4299   | CG  | CG  | . TYR TYR TYR B B 130 130 . | 0.1248 | 0.1288 | 0.1359 | -0.0160 | -0.0196 |   |
| 0.0092 | 1   | .   |                             |        |        |        |         |         |   |
| 4300   | CD1 | CD1 | . TYR TYR TYR B B 130 130 . | 0.1909 | 0.1516 | 0.1929 | -0.0073 | -0.0058 |   |
| 0.0109 | 1   | .   |                             |        |        |        |         |         |   |
| 4301   | CE1 | CE1 | . TYR TYR TYR B B 130 130 . | 0.1705 | 0.1875 | 0.2454 | -0.0012 | -0.0041 |   |
| 0.0175 | 1   | .   |                             |        |        |        |         |         |   |
| 4302   | CZ  | CZ  | . TYR TYR TYR B B 130 130 . | 0.1983 | 0.1580 | 0.2107 | -0.0083 | 0.0173  | - |
| 0.0016 | 1   | .   |                             |        |        |        |         |         |   |
| 4303   | OH  | OH  | . TYR TYR TYR B B 130 130 . | 0.2184 | 0.1586 | 0.3473 | -0.0346 | 0.0382  |   |
| 0.0140 | 1   | .   |                             |        |        |        |         |         |   |
| 4304   | CE2 | CE2 | . TYR TYR TYR B B 130 130 . | 0.1257 | 0.1792 | 0.2173 | -0.0002 | 0.0262  |   |
| 0.0125 | 1   | .   |                             |        |        |        |         |         |   |
| 4305   | CD2 | CD2 | . TYR TYR TYR B B 130 130 . | 0.1397 | 0.1380 | 0.1480 | -0.0217 | 0.0166  |   |
| 0.0366 | 1   | .   |                             |        |        |        |         |         |   |
| 4306   | C   | C   | . TYR TYR TYR B B 130 130 . | 0.1375 | 0.1255 | 0.1401 | -0.0089 | -0.0146 |   |
| 0.0125 | 1   | .   |                             |        |        |        |         |         |   |
| 4307   | O   | O   | . TYR TYR TYR B B 130 130 . | 0.1362 | 0.1258 | 0.1507 | -0.0164 | -0.0110 |   |
| 0.0076 | 1   | .   |                             |        |        |        |         |         |   |
| 4308   | N   | N   | . ARG ARG ARG B B 131 131 . | 0.1242 | 0.1340 | 0.1243 | -0.0256 | -0.0102 | - |
| 0.0105 | 1   | .   |                             |        |        |        |         |         |   |
| 4309   | CA  | CA  | . ARG ARG ARG B B 131 131 . | 0.1449 | 0.1184 | 0.1644 | -0.0177 | -0.0152 | - |
| 0.0045 | 1   | .   |                             |        |        |        |         |         |   |
| 4310   | CB  | CB  | . ARG ARG ARG B B 131 131 . | 0.1600 | 0.1342 | 0.1826 | -0.0203 | -0.0165 |   |
| 0.0031 | 1   | .   |                             |        |        |        |         |         |   |
| 4311   | CG  | CG  | . ARG ARG ARG B B 131 131 . | 0.2173 | 0.2124 | 0.2887 | -0.0357 | 0.0043  | - |
| 0.0079 | 1   | .   |                             |        |        |        |         |         |   |
| 4312   | CD  | CD  | . ARG ARG ARG B B 131 131 . | 0.3538 | 0.2701 | 0.4118 | -0.0782 | 0.0148  | - |
| 0.0226 | 1   | .   |                             |        |        |        |         |         |   |









|        |     |     |                             |        |        |        |         |         |   |
|--------|-----|-----|-----------------------------|--------|--------|--------|---------|---------|---|
| 4403   | CG2 | CG2 | . ILE ILE ILE B B 143 143 . | 0.2758 | 0.3236 | 0.2555 | -0.0300 | -0.0623 |   |
| 0.0110 | 1   | .   |                             |        |        |        |         |         |   |
| 4404   | C   | C   | . ILE ILE ILE B B 143 143 . | 0.1496 | 0.1628 | 0.1620 | -0.0203 | 0.0047  |   |
| 0.0011 | 1   | .   |                             |        |        |        |         |         |   |
| 4405   | O   | O   | . ILE ILE ILE B B 143 143 . | 0.1716 | 0.1625 | 0.1858 | 0.0115  | -0.0069 |   |
| 0.0114 | 1   | .   |                             |        |        |        |         |         |   |
| 4406   | N   | N   | . LEU LEU LEU B B 144 144 . | 0.1740 | 0.1435 | 0.1497 | -0.0272 | -0.0137 |   |
| 0.0174 | 1   | .   |                             |        |        |        |         |         |   |
| 4407   | CA  | CA  | . LEU LEU LEU B B 144 144 . | 0.1445 | 0.1231 | 0.1098 | -0.0222 | 0.0020  |   |
| 0.0087 | 1   | .   |                             |        |        |        |         |         |   |
| 4408   | CB  | CB  | . LEU LEU LEU B B 144 144 . | 0.1629 | 0.1387 | 0.1181 | -0.0118 | -0.0016 |   |
| 0.0244 | 1   | .   |                             |        |        |        |         |         |   |
| 4409   | CG  | CG  | . LEU LEU LEU B B 144 144 . | 0.1759 | 0.1645 | 0.1156 | -0.0330 | 0.0109  |   |
| 0.0036 | 1   | .   |                             |        |        |        |         |         |   |
| 4410   | CD1 | CD1 | . LEU LEU LEU B B 144 144 . | 0.1916 | 0.1416 | 0.1324 | 0.0156  | 0.0155  | - |
| 0.0096 | 1   | .   |                             |        |        |        |         |         |   |
| 4411   | CD2 | CD2 | . LEU LEU LEU B B 144 144 . | 0.1734 | 0.1836 | 0.1903 | -0.0512 | 0.0035  |   |
| 0.0352 | 1   | .   |                             |        |        |        |         |         |   |
| 4412   | C   | C   | . LEU LEU LEU B B 144 144 . | 0.1416 | 0.1103 | 0.1149 | -0.0293 | 0.0036  | - |
| 0.0002 | 1   | .   |                             |        |        |        |         |         |   |
| 4413   | O   | O   | . LEU LEU LEU B B 144 144 . | 0.1556 | 0.1230 | 0.1226 | -0.0227 | 0.0127  | - |
| 0.0099 | 1   | .   |                             |        |        |        |         |         |   |
| 4414   | N   | N   | . PRO PRO PRO B B 145 145 . | 0.1124 | 0.0985 | 0.1016 | -0.0226 | -0.0016 |   |
| 0.0040 | 1   | .   |                             |        |        |        |         |         |   |
| 4415   | CA  | CA  | . PRO PRO PRO B B 145 145 . | 0.1247 | 0.0769 | 0.1107 | -0.0159 | 0.0153  |   |
| 0.0055 | 1   | .   |                             |        |        |        |         |         |   |
| 4416   | CB  | CB  | . PRO PRO PRO B B 145 145 . | 0.1281 | 0.1004 | 0.0964 | -0.0032 | 0.0113  | - |
| 0.0071 | 1   | .   |                             |        |        |        |         |         |   |
| 4417   | CG  | CG  | . PRO PRO PRO B B 145 145 . | 0.1252 | 0.0944 | 0.1051 | -0.0353 | 0.0125  |   |
| 0.0147 | 1   | .   |                             |        |        |        |         |         |   |
| 4418   | CD  | CD  | . PRO PRO PRO B B 145 145 . | 0.1188 | 0.1090 | 0.1138 | -0.0176 | -0.0054 | - |
| 0.0254 | 1   | .   |                             |        |        |        |         |         |   |
| 4419   | C   | C   | . PRO PRO PRO B B 145 145 . | 0.1286 | 0.0863 | 0.1151 | -0.0192 | -0.0012 |   |
| 0.0000 | 1   | .   |                             |        |        |        |         |         |   |
| 4420   | O   | O   | . PRO PRO PRO B B 145 145 . | 0.1168 | 0.1149 | 0.0922 | 0.0046  | 0.0147  |   |
| 0.0024 | 1   | .   |                             |        |        |        |         |         |   |
| 4421   | N   | N   | . VAL VAL VAL B B 146 146 . | 0.0875 | 0.0938 | 0.0889 | -0.0090 | 0.0136  |   |
| 0.0021 | 1   | .   |                             |        |        |        |         |         |   |
| 4422   | CA  | CA  | . VAL VAL VAL B B 146 146 . | 0.0929 | 0.0749 | 0.0769 | -0.0108 | 0.0000  | - |
| 0.0015 | 1   | .   |                             |        |        |        |         |         |   |
| 4423   | CB  | CB  | . VAL VAL VAL B B 146 146 . | 0.1027 | 0.0754 | 0.0790 | -0.0068 | 0.0175  | - |
| 0.0054 | 1   | .   |                             |        |        |        |         |         |   |
| 4424   | CG1 | CG1 | . VAL VAL VAL B B 146 146 . | 0.1279 | 0.1440 | 0.1099 | -0.0165 | -0.0057 | - |
| 0.0170 | 1   | .   |                             |        |        |        |         |         |   |
| 4425   | CG2 | CG2 | . VAL VAL VAL B B 146 146 . | 0.1752 | 0.1124 | 0.1211 | 0.0051  | 0.0466  | - |
| 0.0188 | 1   | .   |                             |        |        |        |         |         |   |
| 4426   | C   | C   | . VAL VAL VAL B B 146 146 . | 0.0957 | 0.0772 | 0.0976 | 0.0117  | 0.0101  |   |
| 0.0035 | 1   | .   |                             |        |        |        |         |         |   |
| 4427   | O   | O   | . VAL VAL VAL B B 146 146 . | 0.1052 | 0.0846 | 0.0959 | 0.0090  | 0.0024  | - |
| 0.0121 | 1   | .   |                             |        |        |        |         |         |   |
| 4428   | N   | N   | . PRO PRO PRO B B 147 147 . | 0.1134 | 0.0776 | 0.0823 | 0.0004  | -0.0050 | - |
| 0.0006 | 1   | .   |                             |        |        |        |         |         |   |
| 4429   | CA  | CA  | . PRO PRO PRO B B 147 147 . | 0.0890 | 0.0833 | 0.0782 | 0.0040  | -0.0048 | - |
| 0.0091 | 1   | .   |                             |        |        |        |         |         |   |
| 4430   | CB  | CB  | . PRO PRO PRO B B 147 147 . | 0.1275 | 0.0807 | 0.0819 | 0.0081  | 0.0127  | - |
| 0.0066 | 1   | .   |                             |        |        |        |         |         |   |
| 4431   | CG  | CG  | . PRO PRO PRO B B 147 147 . | 0.1187 | 0.0954 | 0.0996 | 0.0147  | -0.0107 | - |
| 0.0081 | 1   | .   |                             |        |        |        |         |         |   |
| 4432   | CD  | CD  | . PRO PRO PRO B B 147 147 . | 0.1173 | 0.0780 | 0.0863 | 0.0365  | -0.0140 | - |
| 0.0036 | 1   | .   |                             |        |        |        |         |         |   |

|        |     |     |                             |        |        |        |         |         |   |
|--------|-----|-----|-----------------------------|--------|--------|--------|---------|---------|---|
| 4433   | C   | C   | . PRO PRO PRO B B 147 147 . | 0.0986 | 0.0942 | 0.1073 | 0.0024  | -0.0046 | - |
| 0.0113 | 1   | .   |                             |        |        |        |         |         |   |
| 4434   | O   | O   | . PRO PRO PRO B B 147 147 . | 0.1279 | 0.0928 | 0.1318 | 0.0106  | 0.0229  | - |
| 0.0084 | 1   | .   |                             |        |        |        |         |         |   |
| 4435   | N   | N   | . ALA ALA ALA B B 148 148 . | 0.1232 | 0.0973 | 0.1088 | -0.0098 | 0.0027  |   |
| 0.0005 | 1   | .   |                             |        |        |        |         |         |   |
| 4436   | CA  | CA  | . ALA ALA ALA B B 148 148 . | 0.0827 | 0.0945 | 0.0770 | 0.0130  | -0.0007 |   |
| 0.0115 | 1   | .   |                             |        |        |        |         |         |   |
| 4437   | CB  | CB  | . ALA ALA ALA B B 148 148 . | 0.1320 | 0.1038 | 0.0889 | 0.0140  | -0.0010 |   |
| 0.0185 | 1   | .   |                             |        |        |        |         |         |   |
| 4438   | C   | C   | . ALA ALA ALA B B 148 148 . | 0.0953 | 0.0919 | 0.0830 | 0.0000  | 0.0032  | - |
| 0.0068 | 1   | .   |                             |        |        |        |         |         |   |
| 4439   | O   | O   | . ALA ALA ALA B B 148 148 . | 0.0914 | 0.0997 | 0.1074 | 0.0231  | -0.0059 |   |
| 0.0075 | 1   | .   |                             |        |        |        |         |         |   |
| 4440   | N   | N   | . PHE PHE PHE B B 149 149 . | 0.0978 | 0.1090 | 0.0836 | 0.0127  | 0.0066  |   |
| 0.0034 | 1   | .   |                             |        |        |        |         |         |   |
| 4441   | CA  | CA  | . PHE PHE PHE B B 149 149 . | 0.0852 | 0.0996 | 0.0763 | 0.0013  | 0.0020  |   |
| 0.0127 | 1   | .   |                             |        |        |        |         |         |   |
| 4442   | CB  | CB  | . PHE PHE PHE B B 149 149 . | 0.1094 | 0.1015 | 0.1121 | -0.0001 | 0.0035  |   |
| 0.0047 | 1   | .   |                             |        |        |        |         |         |   |
| 4443   | CG  | CG  | . PHE PHE PHE B B 149 149 . | 0.0710 | 0.0908 | 0.0718 | -0.0046 | 0.0086  |   |
| 0.0143 | 1   | .   |                             |        |        |        |         |         |   |
| 4444   | CD1 | CD1 | . PHE PHE PHE B B 149 149 . | 0.0826 | 0.0798 | 0.0737 | -0.0028 | 0.0124  |   |
| 0.0043 | 1   | .   |                             |        |        |        |         |         |   |
| 4445   | CE1 | CE1 | . PHE PHE PHE B B 149 149 . | 0.1121 | 0.0754 | 0.0991 | 0.0039  | 0.0141  |   |
| 0.0228 | 1   | .   |                             |        |        |        |         |         |   |
| 4446   | CZ  | CZ  | . PHE PHE PHE B B 149 149 . | 0.1406 | 0.1137 | 0.1019 | -0.0053 | 0.0262  |   |
| 0.0055 | 1   | .   |                             |        |        |        |         |         |   |
| 4447   | CE2 | CE2 | . PHE PHE PHE B B 149 149 . | 0.0860 | 0.0809 | 0.1275 | -0.0137 | 0.0144  | - |
| 0.0192 | 1   | .   |                             |        |        |        |         |         |   |
| 4448   | CD2 | CD2 | . PHE PHE PHE B B 149 149 . | 0.1122 | 0.1194 | 0.1385 | -0.0240 | -0.0122 | - |
| 0.0126 | 1   | .   |                             |        |        |        |         |         |   |
| 4449   | C   | C   | . PHE PHE PHE B B 149 149 . | 0.0843 | 0.0921 | 0.0807 | 0.0020  | 0.0128  |   |
| 0.0037 | 1   | .   |                             |        |        |        |         |         |   |
| 4450   | O   | O   | . PHE PHE PHE B B 149 149 . | 0.0985 | 0.0911 | 0.0881 | 0.0097  | 0.0207  |   |
| 0.0076 | 1   | .   |                             |        |        |        |         |         |   |
| 4451   | N   | N   | . ASN ASN ASN B B 150 150 . | 0.1042 | 0.0836 | 0.1013 | 0.0056  | 0.0110  |   |
| 0.0002 | 1   | .   |                             |        |        |        |         |         |   |
| 4452   | CA  | CA  | . ASN ASN ASN B B 150 150 . | 0.0895 | 0.1088 | 0.1152 | 0.0198  | 0.0094  | - |
| 0.0104 | 1   | .   |                             |        |        |        |         |         |   |
| 4453   | CB  | CB  | . ASN ASN ASN B B 150 150 . | 0.1342 | 0.1058 | 0.1452 | -0.0062 | 0.0465  | - |
| 0.0086 | 1   | .   |                             |        |        |        |         |         |   |
| 4454   | CG  | CG  | . ASN ASN ASN B B 150 150 . | 0.2117 | 0.1440 | 0.1364 | 0.0003  | 0.0427  | - |
| 0.0092 | 1   | .   |                             |        |        |        |         |         |   |
| 4455   | OD1 | OD1 | . ASN ASN ASN B B 150 150 . | 0.2004 | 0.2241 | 0.2357 | 0.0627  | 0.0127  | - |
| 0.0322 | 1   | .   |                             |        |        |        |         |         |   |
| 4456   | ND2 | ND2 | . ASN ASN ASN B B 150 150 . | 0.0800 | 0.1000 | 0.1529 | 0.0182  | -0.0030 |   |
| 0.0266 | 1   | .   |                             |        |        |        |         |         |   |
| 4457   | C   | C   | . ASN ASN ASN B B 150 150 . | 0.1239 | 0.1504 | 0.1025 | 0.0100  | 0.0068  |   |
| 0.0083 | 1   | .   |                             |        |        |        |         |         |   |
| 4458   | O   | O   | . ASN ASN ASN B B 150 150 . | 0.1861 | 0.2755 | 0.1630 | 0.0111  | 0.0218  |   |
| 0.0104 | 1   | .   |                             |        |        |        |         |         |   |
| 4459   | N   | N   | . VAL VAL VAL B B 151 151 . | 0.1068 | 0.1113 | 0.0957 | 0.0147  | -0.0005 |   |
| 0.0099 | 1   | .   |                             |        |        |        |         |         |   |
| 4460   | CA  | CA  | . VAL VAL VAL B B 151 151 . | 0.1121 | 0.1086 | 0.0762 | 0.0010  | -0.0100 |   |
| 0.0034 | 1   | .   |                             |        |        |        |         |         |   |
| 4461   | CB  | CB  | . VAL VAL VAL B B 151 151 . | 0.1054 | 0.1081 | 0.1139 | 0.0022  | 0.0064  |   |
| 0.0108 | 1   | .   |                             |        |        |        |         |         |   |
| 4462   | CG1 | CG1 | . VAL VAL VAL B B 151 151 . | 0.1165 | 0.1346 | 0.1453 | -0.0161 | -0.0154 |   |
| 0.0000 | 1   | .   |                             |        |        |        |         |         |   |



|        |     |     |                   |         |                                        |   |
|--------|-----|-----|-------------------|---------|----------------------------------------|---|
| 4493   | OG  | OG  | . SER SER SER B B | 156 156 | . 0.3025 0.2794 0.1988 0.0987 0.0393   | - |
| 0.0073 | 1   | .   |                   |         |                                        |   |
| 4494   | C   | C   | . SER SER SER B B | 156 156 | . 0.2593 0.2393 0.2648 0.0107 0.0328   | - |
| 0.0105 | 1   | .   |                   |         |                                        |   |
| 4495   | O   | O   | . SER SER SER B B | 156 156 | . 0.2433 0.2303 0.2757 -0.0168 0.0660  |   |
| 0.0231 | 1   | .   |                   |         |                                        |   |
| 4496   | N   | N   | . HIS HIS HIS B B | 157 157 | . 0.1809 0.1794 0.2789 0.0063 0.0224   | - |
| 0.0188 | 1   | .   |                   |         |                                        |   |
| 4497   | CA  | CA  | . HIS HIS HIS B B | 157 157 | . 0.1762 0.1855 0.2511 -0.0050 0.0044  | - |
| 0.0016 | 1   | .   |                   |         |                                        |   |
| 4498   | CB  | CB  | . HIS HIS HIS B B | 157 157 | . 0.1910 0.1944 0.2244 -0.0160 -0.0056 | - |
| 0.0255 | 1   | .   |                   |         |                                        |   |
| 4499   | CG  | CG  | . HIS HIS HIS B B | 157 157 | . 0.2009 0.2240 0.2458 0.0328 0.0030   | - |
| 0.0246 | 1   | .   |                   |         |                                        |   |
| 4500   | ND1 | ND1 | . HIS HIS HIS B B | 157 157 | . 0.2122 0.2033 0.2895 -0.0101 0.0459  |   |
| 0.0197 | 1   | .   |                   |         |                                        |   |
| 4501   | CE1 | CE1 | . HIS HIS HIS B B | 157 157 | . 0.1835 0.2684 0.2763 -0.0020 0.0087  | - |
| 0.0318 | 1   | .   |                   |         |                                        |   |
| 4502   | NE2 | NE2 | . HIS HIS HIS B B | 157 157 | . 0.1956 0.1985 0.1538 0.0201 0.0209   |   |
| 0.0032 | 1   | .   |                   |         |                                        |   |
| 4503   | CD2 | CD2 | . HIS HIS HIS B B | 157 157 | . 0.2340 0.2467 0.1948 -0.0164 0.0385  | - |
| 0.0434 | 1   | .   |                   |         |                                        |   |
| 4504   | C   | C   | . HIS HIS HIS B B | 157 157 | . 0.2253 0.2288 0.2459 -0.0064 0.0100  |   |
| 0.0071 | 1   | .   |                   |         |                                        |   |
| 4505   | O   | O   | . HIS HIS HIS B B | 157 157 | . 0.1785 0.1777 0.2428 -0.0036 0.0179  |   |
| 0.0455 | 1   | .   |                   |         |                                        |   |
| 4506   | N   | N   | . ALA ALA ALA B B | 158 158 | . 0.2310 0.2429 0.2562 -0.0108 -0.0052 | - |
| 0.0100 | 1   | .   |                   |         |                                        |   |
| 4507   | CA  | CA  | . ALA ALA ALA B B | 158 158 | . 0.2405 0.2399 0.2510 0.0087 -0.0238  | - |
| 0.0174 | 1   | .   |                   |         |                                        |   |
| 4508   | CB  | CB  | . ALA ALA ALA B B | 158 158 | . 0.2638 0.2963 0.2394 0.0092 -0.0311  | - |
| 0.0455 | 1   | .   |                   |         |                                        |   |
| 4509   | C   | C   | . ALA ALA ALA B B | 158 158 | . 0.2430 0.2352 0.2213 -0.0009 0.0068  | - |
| 0.0127 | 1   | .   |                   |         |                                        |   |
| 4510   | O   | O   | . ALA ALA ALA B B | 158 158 | . 0.2898 0.2171 0.2413 0.0745 -0.0026  |   |
| 0.0010 | 1   | .   |                   |         |                                        |   |
| 4511   | N   | N   | . GLY GLY GLY B B | 159 159 | . 0.1950 0.2203 0.2168 0.0194 -0.0044  | - |
| 0.0101 | 1   | .   |                   |         |                                        |   |
| 4512   | CA  | CA  | . GLY GLY GLY B B | 159 159 | . 0.1960 0.2302 0.1816 0.0046 -0.0180  | - |
| 0.0017 | 1   | .   |                   |         |                                        |   |
| 4513   | C   | C   | . GLY GLY GLY B B | 159 159 | . 0.1896 0.2359 0.1797 0.0128 -0.0191  |   |
| 0.0125 | 1   | .   |                   |         |                                        |   |
| 4514   | O   | O   | . GLY GLY GLY B B | 159 159 | . 0.2441 0.2021 0.1667 -0.0097 -0.0301 |   |
| 0.0180 | 1   | .   |                   |         |                                        |   |
| 4515   | N   | N   | . ASN ASN ASN B B | 160 160 | . 0.1793 0.1997 0.1630 0.0182 -0.0171  |   |
| 0.0351 | 1   | .   |                   |         |                                        |   |
| 4516   | CA  | CA  | . ASN ASN ASN B B | 160 160 | . 0.1697 0.1696 0.1569 0.0022 -0.0179  |   |
| 0.0136 | 1   | .   |                   |         |                                        |   |
| 4517   | CB  | CB  | . ASN ASN ASN B B | 160 160 | . 0.1494 0.1899 0.1829 0.0123 -0.0338  | - |
| 0.0051 | 1   | .   |                   |         |                                        |   |
| 4518   | CG  | CG  | . ASN ASN ASN B B | 160 160 | . 0.1703 0.1874 0.1962 0.0107 -0.0489  |   |
| 0.0094 | 1   | .   |                   |         |                                        |   |
| 4519   | OD1 | OD1 | . ASN ASN ASN B B | 160 160 | . 0.2033 0.2431 0.2311 0.0102 -0.0728  |   |
| 0.0302 | 1   | .   |                   |         |                                        |   |
| 4520   | ND2 | ND2 | . ASN ASN ASN B B | 160 160 | . 0.1565 0.2095 0.1249 0.0139 -0.0215  |   |
| 0.0017 | 1   | .   |                   |         |                                        |   |
| 4521   | C   | C   | . ASN ASN ASN B B | 160 160 | . 0.1246 0.1472 0.1395 -0.0119 -0.0294 | - |
| 0.0028 | 1   | .   |                   |         |                                        |   |
| 4522   | O   | O   | . ASN ASN ASN B B | 160 160 | . 0.1622 0.1792 0.1716 -0.0028 -0.0137 | - |
| 0.0090 | 1   | .   |                   |         |                                        |   |







|        |     |     |                             |        |        |        |         |         |   |
|--------|-----|-----|-----------------------------|--------|--------|--------|---------|---------|---|
| 4583   | CA  | CA  | . MET MET MET B B 168 168 . | 0.0926 | 0.0883 | 0.0990 | -0.0051 | 0.0085  | - |
| 0.0017 | 1   | .   |                             |        |        |        |         |         |   |
| 4584   | CB  | CB  | . MET MET MET B B 168 168 . | 0.1136 | 0.1104 | 0.0898 | 0.0150  | 0.0013  | - |
| 0.0115 | 1   | .   |                             |        |        |        |         |         |   |
| 4585   | CG  | CG  | . MET MET MET B B 168 168 . | 0.1216 | 0.1470 | 0.1281 | 0.0300  | 0.0093  | - |
| 0.0326 | 1   | .   |                             |        |        |        |         |         |   |
| 4586   | SD  | SD  | . MET MET MET B B 168 168 . | 0.1227 | 0.1254 | 0.1636 | 0.0053  | 0.0075  | - |
| 0.0095 | 1   | .   |                             |        |        |        |         |         |   |
| 4587   | CE  | CE  | . MET MET MET B B 168 168 . | 0.1393 | 0.1195 | 0.1615 | 0.0374  | 0.0217  | - |
| 0.0228 | 1   | .   |                             |        |        |        |         |         |   |
| 4588   | C   | C   | . MET MET MET B B 168 168 . | 0.1092 | 0.0827 | 0.0813 | -0.0069 | 0.0173  | - |
| 0.0115 | 1   | .   |                             |        |        |        |         |         |   |
| 4589   | O   | O   | . MET MET MET B B 168 168 . | 0.1294 | 0.0763 | 0.0978 | 0.0067  | 0.0178  | - |
| 0.0001 | 1   | .   |                             |        |        |        |         |         |   |
| 4590   | N   | N   | . ILE ILE ILE B B 169 169 . | 0.1270 | 0.0654 | 0.0915 | 0.0132  | 0.0034  | - |
| 0.0062 | 1   | .   |                             |        |        |        |         |         |   |
| 4591   | CA  | CA  | . ILE ILE ILE B B 169 169 . | 0.1003 | 0.0974 | 0.0944 | 0.0073  | -0.0013 | - |
| 0.0114 | 1   | .   |                             |        |        |        |         |         |   |
| 4592   | CB  | CB  | . ILE ILE ILE B B 169 169 . | 0.0998 | 0.1079 | 0.0817 | 0.0122  | 0.0260  | - |
| 0.0217 | 1   | .   |                             |        |        |        |         |         |   |
| 4593   | CG1 | CG1 | . ILE ILE ILE B B 169 169 . | 0.1217 | 0.1194 | 0.0814 | 0.0118  | 0.0028  | - |
| 0.0140 | 1   | .   |                             |        |        |        |         |         |   |
| 4594   | CD  | CD  | . ILE ILE ILE B B 169 169 . | 0.1209 | 0.1568 | 0.1379 | 0.0402  | 0.0446  | - |
| 0.0329 | 1   | .   |                             |        |        |        |         |         |   |
| 4595   | CG2 | CG2 | . ILE ILE ILE B B 169 169 . | 0.1177 | 0.1042 | 0.0852 | -0.0232 | 0.0405  | - |
| 0.0020 | 1   | .   |                             |        |        |        |         |         |   |
| 4596   | C   | C   | . ILE ILE ILE B B 169 169 . | 0.1084 | 0.0860 | 0.0980 | -0.0004 | 0.0188  | - |
| 0.0036 | 1   | .   |                             |        |        |        |         |         |   |
| 4597   | O   | O   | . ILE ILE ILE B B 169 169 . | 0.1243 | 0.1269 | 0.0946 | -0.0080 | 0.0209  | - |
| 0.0116 | 1   | .   |                             |        |        |        |         |         |   |
| 4598   | N   | N   | . LEU LEU LEU B B 170 170 . | 0.1028 | 0.0790 | 0.0858 | 0.0020  | -0.0039 | - |
| 0.0095 | 1   | .   |                             |        |        |        |         |         |   |
| 4599   | CA  | CA  | . LEU LEU LEU B B 170 170 . | 0.1035 | 0.0843 | 0.1029 | -0.0063 | 0.0133  | - |
| 0.0162 | 1   | .   |                             |        |        |        |         |         |   |
| 4600   | CB  | CB  | . LEU LEU LEU B B 170 170 . | 0.1378 | 0.0961 | 0.0832 | 0.0072  | 0.0261  | - |
| 0.0161 | 1   | .   |                             |        |        |        |         |         |   |
| 4601   | CG  | CG  | . LEU LEU LEU B B 170 170 . | 0.1186 | 0.0813 | 0.1141 | 0.0101  | -0.0114 | - |
| 0.0135 | 1   | .   |                             |        |        |        |         |         |   |
| 4602   | CD1 | CD1 | . LEU LEU LEU B B 170 170 . | 0.1581 | 0.1438 | 0.1555 | -0.0173 | -0.0041 | - |
| 0.0028 | 1   | .   |                             |        |        |        |         |         |   |
| 4603   | CD2 | CD2 | . LEU LEU LEU B B 170 170 . | 0.1681 | 0.1402 | 0.1641 | 0.0323  | -0.0529 | - |
| 0.0149 | 1   | .   |                             |        |        |        |         |         |   |
| 4604   | C   | C   | . LEU LEU LEU B B 170 170 . | 0.1403 | 0.0994 | 0.0979 | 0.0048  | 0.0264  | - |
| 0.0021 | 1   | .   |                             |        |        |        |         |         |   |
| 4605   | O   | O   | . LEU LEU LEU B B 170 170 . | 0.1391 | 0.1006 | 0.0914 | -0.0132 | 0.0373  | - |
| 0.0056 | 1   | .   |                             |        |        |        |         |         |   |
| 4606   | N   | N   | . PRO PRO PRO B B 171 171 . | 0.1362 | 0.1103 | 0.0895 | -0.0069 | 0.0213  | - |
| 0.0039 | 1   | .   |                             |        |        |        |         |         |   |
| 4607   | CA  | CA  | . PRO PRO PRO B B 171 171 . | 0.1407 | 0.1046 | 0.0926 | -0.0001 | 0.0109  | - |
| 0.0023 | 1   | .   |                             |        |        |        |         |         |   |
| 4608   | CB  | CB  | . PRO PRO PRO B B 171 171 . | 0.1446 | 0.1263 | 0.0956 | -0.0187 | 0.0204  | - |
| 0.0150 | 1   | .   |                             |        |        |        |         |         |   |
| 4609   | CG  | CG  | . PRO PRO PRO B B 171 171 . | 0.1531 | 0.0766 | 0.1287 | -0.0021 | -0.0036 | - |
| 0.0278 | 1   | .   |                             |        |        |        |         |         |   |
| 4610   | CD  | CD  | . PRO PRO PRO B B 171 171 . | 0.1235 | 0.1167 | 0.0845 | -0.0039 | 0.0175  | - |
| 0.0033 | 1   | .   |                             |        |        |        |         |         |   |
| 4611   | C   | C   | . PRO PRO PRO B B 171 171 . | 0.1458 | 0.0953 | 0.1106 | -0.0113 | 0.0151  | - |
| 0.0092 | 1   | .   |                             |        |        |        |         |         |   |
| 4612   | O   | O   | . PRO PRO PRO B B 171 171 . | 0.1488 | 0.1140 | 0.1097 | -0.0273 | 0.0289  | - |
| 0.0219 | 1   | .   |                             |        |        |        |         |         |   |

|        |     |     |                             |        |        |        |         |         |   |
|--------|-----|-----|-----------------------------|--------|--------|--------|---------|---------|---|
| 4613   | N   | N   | . VAL VAL VAL B B 172 172 . | 0.1522 | 0.1160 | 0.1034 | -0.0074 | 0.0155  | - |
| 0.0097 | 1   | .   |                             |        |        |        |         |         |   |
| 4614   | CA  | CA  | . VAL VAL VAL B B 172 172 . | 0.1755 | 0.1092 | 0.1126 | -0.0019 | 0.0095  | - |
| 0.0072 | 1   | .   |                             |        |        |        |         |         |   |
| 4615   | CB  | CB  | . VAL VAL VAL B B 172 172 . | 0.1817 | 0.1234 | 0.1422 | -0.0205 | 0.0186  | - |
| 0.0002 | 1   | .   |                             |        |        |        |         |         |   |
| 4616   | CG1 | CG1 | . VAL VAL VAL B B 172 172 . | 0.1561 | 0.1471 | 0.1481 | 0.0011  | 0.0149  | - |
| 0.0263 | 1   | .   |                             |        |        |        |         |         |   |
| 4617   | CG2 | CG2 | . VAL VAL VAL B B 172 172 . | 0.2067 | 0.1552 | 0.1406 | -0.0042 | 0.0403  | - |
| 0.0244 | 1   | .   |                             |        |        |        |         |         |   |
| 4618   | C   | C   | . VAL VAL VAL B B 172 172 . | 0.1334 | 0.1122 | 0.1207 | -0.0076 | 0.0115  | - |
| 0.0074 | 1   | .   |                             |        |        |        |         |         |   |
| 4619   | O   | O   | . VAL VAL VAL B B 172 172 . | 0.1588 | 0.1568 | 0.1234 | -0.0079 | 0.0324  | - |
| 0.0208 | 1   | .   |                             |        |        |        |         |         |   |
| 4620   | N   | N   | . GLY GLY GLY B B 173 173 . | 0.1946 | 0.1165 | 0.1184 | -0.0059 | 0.0385  | - |
| 0.0219 | 1   | .   |                             |        |        |        |         |         |   |
| 4621   | CA  | CA  | . GLY GLY GLY B B 173 173 . | 0.1943 | 0.0922 | 0.1584 | -0.0064 | 0.0515  | - |
| 0.0157 | 1   | .   |                             |        |        |        |         |         |   |
| 4622   | C   | C   | . GLY GLY GLY B B 173 173 . | 0.2324 | 0.1337 | 0.1570 | -0.0050 | 0.0303  | - |
| 0.0134 | 1   | .   |                             |        |        |        |         |         |   |
| 4623   | O   | O   | . GLY GLY GLY B B 173 173 . | 0.2497 | 0.1316 | 0.1866 | -0.0039 | 0.0415  | - |
| 0.0302 | 1   | .   |                             |        |        |        |         |         |   |
| 4624   | N   | N   | . ALA ALA ALA B B 174 174 . | 0.2421 | 0.1335 | 0.1459 | -0.0208 | 0.0339  | - |
| 0.0035 | 1   | .   |                             |        |        |        |         |         |   |
| 4625   | CA  | CA  | . ALA ALA ALA B B 174 174 . | 0.2083 | 0.1435 | 0.1297 | -0.0133 | 0.0107  | - |
| 0.0084 | 1   | .   |                             |        |        |        |         |         |   |
| 4626   | CB  | CB  | . ALA ALA ALA B B 174 174 . | 0.2019 | 0.1284 | 0.0860 | -0.0126 | 0.0171  | - |
| 0.0014 | 1   | .   |                             |        |        |        |         |         |   |
| 4627   | C   | C   | . ALA ALA ALA B B 174 174 . | 0.1969 | 0.1492 | 0.1415 | -0.0019 | 0.0100  | - |
| 0.0199 | 1   | .   |                             |        |        |        |         |         |   |
| 4628   | O   | O   | . ALA ALA ALA B B 174 174 . | 0.2007 | 0.1458 | 0.1430 | -0.0123 | 0.0147  | - |
| 0.0211 | 1   | .   |                             |        |        |        |         |         |   |
| 4629   | N   | N   | . GLU GLU GLU B B 175 175 . | 0.2071 | 0.1680 | 0.1567 | -0.0142 | 0.0402  | - |
| 0.0085 | 1   | .   |                             |        |        |        |         |         |   |
| 4630   | CA  | CA  | . GLU GLU GLU B B 175 175 . | 0.2188 | 0.1945 | 0.1945 | -0.0188 | 0.0283  | - |
| 0.0178 | 1   | .   |                             |        |        |        |         |         |   |
| 4631   | CB  | CB  | . GLU GLU GLU B B 175 175 . | 0.2245 | 0.1948 | 0.2573 | -0.0153 | 0.0440  | - |
| 0.0065 | 1   | .   |                             |        |        |        |         |         |   |
| 4632   | CG  | CG  | . GLU GLU GLU B B 175 175 . | 0.3693 | 0.2934 | 0.3684 | 0.0338  | 0.0742  | - |
| 0.0187 | 1   | .   |                             |        |        |        |         |         |   |
| 4633   | CD  | CD  | . GLU GLU GLU B B 175 175 . | 0.5826 | 0.3715 | 0.5248 | 0.0600  | 0.0742  | - |
| 0.0134 | 1   | .   |                             |        |        |        |         |         |   |
| 4634   | OE1 | OE1 | . GLU GLU GLU B B 175 175 . | 0.6437 | 0.4608 | 0.5307 | 0.0419  | 0.0900  | - |
| 0.0173 | 1   | .   |                             |        |        |        |         |         |   |
| 4635   | OE2 | OE2 | . GLU GLU GLU B B 175 175 . | 0.5678 | 0.5104 | 0.5886 | 0.0528  | 0.1063  | - |
| 0.0326 | 1   | .   |                             |        |        |        |         |         |   |
| 4636   | C   | C   | . GLU GLU GLU B B 175 175 . | 0.1806 | 0.1819 | 0.1635 | -0.0327 | 0.0109  | - |
| 0.0172 | 1   | .   |                             |        |        |        |         |         |   |
| 4637   | O   | O   | . GLU GLU GLU B B 175 175 . | 0.2066 | 0.2328 | 0.1877 | -0.0526 | 0.0186  | - |
| 0.0301 | 1   | .   |                             |        |        |        |         |         |   |
| 4638   | N   | N   | . SER SER SER B B 176 176 . | 0.1690 | 0.1392 | 0.1163 | -0.0220 | 0.0058  | - |
| 0.0006 | 1   | .   |                             |        |        |        |         |         |   |
| 4639   | CA  | CA  | . SER SER SER B B 176 176 . | 0.1499 | 0.1327 | 0.1581 | -0.0246 | 0.0091  | - |
| 0.0013 | 1   | .   |                             |        |        |        |         |         |   |
| 4640   | CB  | CB  | . SER SER SER B B 176 176 . | 0.1534 | 0.1120 | 0.1673 | -0.0293 | 0.0006  | - |
| 0.0139 | 1   | .   |                             |        |        |        |         |         |   |
| 4641   | OG  | OG  | . SER SER SER B B 176 176 . | 0.1735 | 0.1514 | 0.1341 | 0.0024  | -0.0113 | - |
| 0.0145 | 1   | .   |                             |        |        |        |         |         |   |
| 4642   | C   | C   | . SER SER SER B B 176 176 . | 0.1263 | 0.1414 | 0.1110 | -0.0065 | 0.0145  | - |
| 0.0149 | 1   | .   |                             |        |        |        |         |         |   |

|        |     |     |                             |        |        |        |         |         |   |
|--------|-----|-----|-----------------------------|--------|--------|--------|---------|---------|---|
| 4643   | O   | O   | . SER SER SER B B 176 176 . | 0.1270 | 0.1154 | 0.1194 | -0.0127 | 0.0003  | - |
| 0.0022 | 1   | .   |                             |        |        |        |         |         |   |
| 4644   | N   | N   | . PHE PHE PHE B B 177 177 . | 0.1634 | 0.1321 | 0.1278 | 0.0039  | 0.0014  | - |
| 0.0105 | 1   | .   |                             |        |        |        |         |         |   |
| 4645   | CA  | CA  | . PHE PHE PHE B B 177 177 . | 0.1346 | 0.1212 | 0.1221 | -0.0175 | -0.0034 | - |
| 0.0153 | 1   | .   |                             |        |        |        |         |         |   |
| 4646   | CB  | CB  | . PHE PHE PHE B B 177 177 . | 0.1719 | 0.1091 | 0.1147 | -0.0285 | -0.0030 | - |
| 0.0127 | 1   | .   |                             |        |        |        |         |         |   |
| 4647   | CG  | CG  | . PHE PHE PHE B B 177 177 . | 0.1498 | 0.1021 | 0.0865 | -0.0188 | -0.0025 | - |
| 0.0142 | 1   | .   |                             |        |        |        |         |         |   |
| 4648   | CD1 | CD1 | . PHE PHE PHE B B 177 177 . | 0.1051 | 0.0823 | 0.1195 | 0.0227  | 0.0138  | - |
| 0.0173 | 1   | .   |                             |        |        |        |         |         |   |
| 4649   | CE1 | CE1 | . PHE PHE PHE B B 177 177 . | 0.1495 | 0.1097 | 0.1086 | -0.0187 | 0.0047  | - |
| 0.0251 | 1   | .   |                             |        |        |        |         |         |   |
| 4650   | CZ  | CZ  | . PHE PHE PHE B B 177 177 . | 0.0822 | 0.0878 | 0.1134 | -0.0081 | -0.0125 | - |
| 0.0047 | 1   | .   |                             |        |        |        |         |         |   |
| 4651   | CE2 | CE2 | . PHE PHE PHE B B 177 177 . | 0.1038 | 0.1153 | 0.1070 | 0.0049  | 0.0072  |   |
| 0.0061 | 1   | .   |                             |        |        |        |         |         |   |
| 4652   | CD2 | CD2 | . PHE PHE PHE B B 177 177 . | 0.1138 | 0.1568 | 0.0928 | -0.0224 | 0.0082  | - |
| 0.0095 | 1   | .   |                             |        |        |        |         |         |   |
| 4653   | C   | C   | . PHE PHE PHE B B 177 177 . | 0.1465 | 0.1217 | 0.1271 | 0.0024  | 0.0033  | - |
| 0.0051 | 1   | .   |                             |        |        |        |         |         |   |
| 4654   | O   | O   | . PHE PHE PHE B B 177 177 . | 0.1401 | 0.0955 | 0.1193 | 0.0002  | 0.0150  | - |
| 0.0049 | 1   | .   |                             |        |        |        |         |         |   |
| 4655   | N   | N   | . ARG ARG ARG B B 178 178 . | 0.1466 | 0.1141 | 0.1100 | -0.0065 | 0.0112  | - |
| 0.0095 | 1   | .   |                             |        |        |        |         |         |   |
| 4656   | CA  | CA  | . ARG ARG ARG B B 178 178 . | 0.1139 | 0.1061 | 0.1374 | 0.0103  | 0.0035  | - |
| 0.0071 | 1   | .   |                             |        |        |        |         |         |   |
| 4657   | CB  | CB  | . ARG ARG ARG B B 178 178 . | 0.1445 | 0.1626 | 0.1682 | -0.0285 | 0.0258  | - |
| 0.0003 | 1   | .   |                             |        |        |        |         |         |   |
| 4658   | CG  | CG  | . ARG ARG ARG B B 178 178 . | 0.2539 | 0.2510 | 0.3175 | -0.0185 | 0.0377  | - |
| 0.0306 | 1   | .   |                             |        |        |        |         |         |   |
| 4659   | CD  | CD  | . ARG ARG ARG B B 178 178 . | 0.4466 | 0.2688 | 0.2345 | -0.1696 | 0.0541  |   |
| 0.0029 | 1   | .   |                             |        |        |        |         |         |   |
| 4660   | NE  | NE  | . ARG ARG ARG B B 178 178 . | 0.4613 | 0.4055 | 0.3732 | -0.1269 | -0.0266 |   |
| 0.0099 | 1   | .   |                             |        |        |        |         |         |   |
| 4661   | CZ  | CZ  | . ARG ARG ARG B B 178 178 . | 0.5019 | 0.3896 | 0.4557 | -0.0810 | -0.0202 | - |
| 0.0148 | 1   | .   |                             |        |        |        |         |         |   |
| 4662   | NH1 | NH1 | . ARG ARG ARG B B 178 178 . | 0.5742 | 0.4440 | 0.5043 | -0.0145 | -0.0485 | - |
| 0.0579 | 1   | .   |                             |        |        |        |         |         |   |
| 4663   | NH2 | NH2 | . ARG ARG ARG B B 178 178 . | 0.3985 | 0.3649 | 0.4600 | -0.0491 | 0.0375  | - |
| 0.0227 | 1   | .   |                             |        |        |        |         |         |   |
| 4664   | C   | C   | . ARG ARG ARG B B 178 178 . | 0.1211 | 0.1106 | 0.1094 | 0.0064  | 0.0023  | - |
| 0.0020 | 1   | .   |                             |        |        |        |         |         |   |
| 4665   | O   | O   | . ARG ARG ARG B B 178 178 . | 0.1220 | 0.0917 | 0.1072 | 0.0033  | 0.0100  | - |
| 0.0121 | 1   | .   |                             |        |        |        |         |         |   |
| 4666   | N   | N   | . ASP ASP ASP B B 179 179 . | 0.1127 | 0.0908 | 0.1170 | 0.0246  | 0.0062  | - |
| 0.0005 | 1   | .   |                             |        |        |        |         |         |   |
| 4667   | CA  | CA  | . ASP ASP ASP B B 179 179 . | 0.1252 | 0.0962 | 0.1212 | -0.0187 | 0.0136  | - |
| 0.0079 | 1   | .   |                             |        |        |        |         |         |   |
| 4668   | CB  | CB  | . ASP ASP ASP B B 179 179 . | 0.1638 | 0.1281 | 0.1398 | 0.0069  | 0.0107  | - |
| 0.0186 | 1   | .   |                             |        |        |        |         |         |   |
| 4669   | CG  | CG  | . ASP ASP ASP B B 179 179 . | 0.2059 | 0.1891 | 0.2115 | -0.0111 | -0.0002 | - |
| 0.0055 | 1   | .   |                             |        |        |        |         |         |   |
| 4670   | OD1 | OD1 | . ASP ASP ASP B B 179 179 . | 0.2783 | 0.2275 | 0.2354 | 0.0430  | 0.0179  |   |
| 0.0057 | 1   | .   |                             |        |        |        |         |         |   |
| 4671   | OD2 | OD2 | . ASP ASP ASP B B 179 179 . | 0.2913 | 0.2118 | 0.2314 | 0.0211  | 0.0111  | - |
| 0.0060 | 1   | .   |                             |        |        |        |         |         |   |
| 4672   | C   | C   | . ASP ASP ASP B B 179 179 . | 0.1023 | 0.0840 | 0.1076 | -0.0009 | 0.0076  |   |
| 0.0022 | 1   | .   |                             |        |        |        |         |         |   |

|        |     |     |                             |        |        |        |         |         |   |
|--------|-----|-----|-----------------------------|--------|--------|--------|---------|---------|---|
| 4673   | O   | O   | . ASP ASP ASP B B 179 179 . | 0.1050 | 0.1051 | 0.1097 | 0.0045  | 0.0081  |   |
| 0.0069 | 1   | .   |                             |        |        |        |         |         |   |
| 4674   | N   | N   | . ALA ALA ALA B B 180 180 . | 0.1378 | 0.1053 | 0.1027 | -0.0119 | -0.0011 |   |
| 0.0064 | 1   | .   |                             |        |        |        |         |         |   |
| 4675   | CA  | CA  | . ALA ALA ALA B B 180 180 . | 0.1198 | 0.0797 | 0.1140 | -0.0129 | 0.0027  |   |
| 0.0068 | 1   | .   |                             |        |        |        |         |         |   |
| 4676   | CB  | CB  | . ALA ALA ALA B B 180 180 . | 0.1241 | 0.1250 | 0.1110 | 0.0034  | -0.0116 |   |
| 0.0021 | 1   | .   |                             |        |        |        |         |         |   |
| 4677   | C   | C   | . ALA ALA ALA B B 180 180 . | 0.0945 | 0.1031 | 0.1009 | -0.0124 | 0.0097  | - |
| 0.0015 | 1   | .   |                             |        |        |        |         |         |   |
| 4678   | O   | O   | . ALA ALA ALA B B 180 180 . | 0.1301 | 0.1043 | 0.1090 | -0.0074 | 0.0231  | - |
| 0.0026 | 1   | .   |                             |        |        |        |         |         |   |
| 4679   | N   | N   | . MET MET MET B B 181 181 . | 0.1305 | 0.0980 | 0.0892 | -0.0057 | 0.0103  |   |
| 0.0083 | 1   | .   |                             |        |        |        |         |         |   |
| 4680   | CA  | CA  | . MET MET MET B B 181 181 . | 0.1141 | 0.1149 | 0.1012 | 0.0013  | 0.0024  |   |
| 0.0038 | 1   | .   |                             |        |        |        |         |         |   |
| 4681   | CB  | CB  | . MET MET MET B B 181 181 . | 0.1400 | 0.1088 | 0.1267 | 0.0055  | 0.0199  |   |
| 0.0166 | 1   | .   |                             |        |        |        |         |         |   |
| 4682   | CG  | CG  | . MET MET MET B B 181 181 . | 0.0864 | 0.0888 | 0.0831 | 0.0061  | 0.0186  | - |
| 0.0029 | 1   | .   |                             |        |        |        |         |         |   |
| 4683   | SD  | SD  | . MET MET MET B B 181 181 . | 0.1287 | 0.1147 | 0.1181 | 0.0000  | 0.0153  | - |
| 0.0009 | 1   | .   |                             |        |        |        |         |         |   |
| 4684   | CE  | CE  | . MET MET MET B B 181 181 . | 0.1453 | 0.1030 | 0.1117 | -0.0214 | -0.0005 |   |
| 0.0088 | 1   | .   |                             |        |        |        |         |         |   |
| 4685   | C   | C   | . MET MET MET B B 181 181 . | 0.1260 | 0.1160 | 0.0726 | 0.0042  | 0.0161  | - |
| 0.0095 | 1   | .   |                             |        |        |        |         |         |   |
| 4686   | O   | O   | . MET MET MET B B 181 181 . | 0.1197 | 0.0996 | 0.1103 | 0.0066  | 0.0183  |   |
| 0.0072 | 1   | .   |                             |        |        |        |         |         |   |
| 4687   | N   | N   | . ARG ARG ARG B B 182 182 . | 0.1222 | 0.0909 | 0.0987 | 0.0122  | 0.0221  | - |
| 0.0044 | 1   | .   |                             |        |        |        |         |         |   |
| 4688   | CA  | CA  | . ARG ARG ARG B B 182 182 . | 0.1238 | 0.1041 | 0.1111 | 0.0095  | 0.0298  |   |
| 0.0045 | 1   | .   |                             |        |        |        |         |         |   |
| 4689   | CB  | CB  | . ARG ARG ARG B B 182 182 . | 0.1303 | 0.1054 | 0.1205 | 0.0101  | 0.0127  | - |
| 0.0012 | 1   | .   |                             |        |        |        |         |         |   |
| 4690   | CG  | CG  | . ARG ARG ARG B B 182 182 . | 0.1610 | 0.1119 | 0.1891 | 0.0251  | 0.0055  | - |
| 0.0113 | 1   | .   |                             |        |        |        |         |         |   |
| 4691   | CD  | CD  | . ARG ARG ARG B B 182 182 . | 0.2326 | 0.1598 | 0.2685 | -0.0183 | -0.0048 |   |
| 0.0247 | 1   | .   |                             |        |        |        |         |         |   |
| 4692   | NE  | NE  | . ARG ARG ARG B B 182 182 . | 0.3101 | 0.2044 | 0.3255 | 0.0257  | 0.0126  | - |
| 0.0551 | 1   | .   |                             |        |        |        |         |         |   |
| 4693   | CZ  | CZ  | . ARG ARG ARG B B 182 182 . | 0.3543 | 0.2501 | 0.3552 | -0.0005 | 0.0057  | - |
| 0.0333 | 1   | .   |                             |        |        |        |         |         |   |
| 4694   | NH1 | NH1 | . ARG ARG ARG B B 182 182 . | 0.3291 | 0.2879 | 0.4048 | 0.0061  | -0.0009 | - |
| 0.0284 | 1   | .   |                             |        |        |        |         |         |   |
| 4695   | NH2 | NH2 | . ARG ARG ARG B B 182 182 . | 0.4345 | 0.2303 | 0.3703 | 0.0339  | -0.0203 | - |
| 0.0547 | 1   | .   |                             |        |        |        |         |         |   |
| 4696   | C   | C   | . ARG ARG ARG B B 182 182 . | 0.1302 | 0.1021 | 0.1112 | 0.0010  | 0.0181  |   |
| 0.0111 | 1   | .   |                             |        |        |        |         |         |   |
| 4697   | O   | O   | . ARG ARG ARG B B 182 182 . | 0.1216 | 0.1051 | 0.1019 | 0.0011  | 0.0092  |   |
| 0.0172 | 1   | .   |                             |        |        |        |         |         |   |
| 4698   | N   | N   | . LEU LEU LEU B B 183 183 . | 0.1106 | 0.0853 | 0.0898 | 0.0369  | 0.0143  | - |
| 0.0065 | 1   | .   |                             |        |        |        |         |         |   |
| 4699   | CA  | CA  | . LEU LEU LEU B B 183 183 . | 0.1086 | 0.1035 | 0.1135 | -0.0008 | 0.0043  | - |
| 0.0134 | 1   | .   |                             |        |        |        |         |         |   |
| 4700   | CB  | CB  | . LEU LEU LEU B B 183 183 . | 0.1476 | 0.1017 | 0.1044 | 0.0270  | 0.0275  | - |
| 0.0157 | 1   | .   |                             |        |        |        |         |         |   |
| 4701   | CG  | CG  | . LEU LEU LEU B B 183 183 . | 0.1840 | 0.1218 | 0.1257 | -0.0097 | 0.0125  | - |
| 0.0320 | 1   | .   |                             |        |        |        |         |         |   |
| 4702   | CD1 | CD1 | . LEU LEU LEU B B 183 183 . | 0.1975 | 0.1386 | 0.1404 | -0.0049 | 0.0223  | - |
| 0.0048 | 1   | .   |                             |        |        |        |         |         |   |





|        |     |     |                             |        |        |        |         |         |
|--------|-----|-----|-----------------------------|--------|--------|--------|---------|---------|
| 4763   | CG  | CG  | . LEU LEU LEU B B 191 191 . | 0.1019 | 0.1387 | 0.1276 | -0.0093 | 0.0129  |
| 0.0350 | 1   | .   |                             |        |        |        |         |         |
| 4764   | CD1 | CD1 | . LEU LEU LEU B B 191 191 . | 0.1116 | 0.1155 | 0.1077 | 0.0070  | 0.0499  |
| 0.0312 | 1   | .   |                             |        |        |        |         |         |
| 4765   | CD2 | CD2 | . LEU LEU LEU B B 191 191 . | 0.1299 | 0.1485 | 0.1613 | 0.0198  | -0.0142 |
| 0.0280 | 1   | .   |                             |        |        |        |         |         |
| 4766   | C   | C   | . LEU LEU LEU B B 191 191 . | 0.1311 | 0.1434 | 0.1522 | 0.0062  | 0.0181  |
| 0.0213 | 1   | .   |                             |        |        |        |         |         |
| 4767   | O   | O   | . LEU LEU LEU B B 191 191 . | 0.1091 | 0.1432 | 0.1476 | 0.0139  | 0.0128  |
| 0.0376 | 1   | .   |                             |        |        |        |         |         |
| 4768   | N   | N   | . LYS LYS LYS B B 192 192 . | 0.1112 | 0.1296 | 0.0984 | 0.0160  | 0.0214  |
| 0.0209 | 1   | .   |                             |        |        |        |         |         |
| 4769   | CA  | CA  | . LYS LYS LYS B B 192 192 . | 0.0889 | 0.1418 | 0.1296 | 0.0180  | 0.0290  |
| 0.0206 | 1   | .   |                             |        |        |        |         |         |
| 4770   | CB  | CB  | . LYS LYS LYS B B 192 192 . | 0.1769 | 0.1302 | 0.1061 | -0.0061 | 0.0257  |
| 0.0360 | 1   | .   |                             |        |        |        |         |         |
| 4771   | CG  | CG  | . LYS LYS LYS B B 192 192 . | 0.1524 | 0.1518 | 0.1483 | -0.0193 | 0.0114  |
| 0.0304 | 1   | .   |                             |        |        |        |         |         |
| 4772   | CD  | CD  | . LYS LYS LYS B B 192 192 . | 0.1693 | 0.1949 | 0.1375 | -0.0458 | -0.0034 |
| 0.0324 | 1   | .   |                             |        |        |        |         |         |
| 4773   | CE  | CE  | . LYS LYS LYS B B 192 192 . | 0.2550 | 0.2272 | 0.1795 | -0.0509 | 0.0244  |
| 0.0070 | 1   | .   |                             |        |        |        |         |         |
| 4774   | NZ  | NZ  | . LYS LYS LYS B B 192 192 . | 0.2438 | 0.3070 | 0.2374 | -0.0766 | 0.0230  |
| 0.0453 | 1   | .   |                             |        |        |        |         |         |
| 4775   | C   | C   | . LYS LYS LYS B B 192 192 . | 0.1252 | 0.1437 | 0.1202 | 0.0115  | 0.0077  |
| 0.0169 | 1   | .   |                             |        |        |        |         |         |
| 4776   | O   | O   | . LYS LYS LYS B B 192 192 . | 0.1502 | 0.1551 | 0.1285 | 0.0118  | 0.0236  |
| 0.0190 | 1   | .   |                             |        |        |        |         |         |
| 4777   | N   | N   | . GLY GLY GLY B B 193 193 . | 0.1231 | 0.1596 | 0.1324 | 0.0094  | 0.0107  |
| 0.0275 | 1   | .   |                             |        |        |        |         |         |
| 4778   | CA  | CA  | . GLY GLY GLY B B 193 193 . | 0.1308 | 0.1716 | 0.1910 | 0.0326  | 0.0161  |
| 0.0367 | 1   | .   |                             |        |        |        |         |         |
| 4779   | C   | C   | . GLY GLY GLY B B 193 193 . | 0.1443 | 0.1563 | 0.1855 | 0.0145  | 0.0024  |
| 0.0232 | 1   | .   |                             |        |        |        |         |         |
| 4780   | O   | O   | . GLY GLY GLY B B 193 193 . | 0.1166 | 0.1775 | 0.1763 | 0.0203  | -0.0024 |
| 0.0510 | 1   | .   |                             |        |        |        |         |         |
| 4781   | N   | N   | . VAL VAL VAL B B 194 194 . | 0.1318 | 0.1476 | 0.1448 | 0.0216  | 0.0399  |
| 0.0357 | 1   | .   |                             |        |        |        |         |         |
| 4782   | CA  | CA  | . VAL VAL VAL B B 194 194 . | 0.1259 | 0.1818 | 0.1452 | -0.0002 | 0.0243  |
| 0.0330 | 1   | .   |                             |        |        |        |         |         |
| 4783   | CB  | CB  | . VAL VAL VAL B B 194 194 . | 0.1404 | 0.1736 | 0.1418 | 0.0123  | 0.0093  |
| 0.0336 | 1   | .   |                             |        |        |        |         |         |
| 4784   | CG1 | CG1 | . VAL VAL VAL B B 194 194 . | 0.1128 | 0.2027 | 0.1500 | -0.0075 | 0.0059  |
| 0.0452 | 1   | .   |                             |        |        |        |         |         |
| 4785   | CG2 | CG2 | . VAL VAL VAL B B 194 194 . | 0.1405 | 0.1646 | 0.1542 | 0.0502  | 0.0325  |
| 0.0163 | 1   | .   |                             |        |        |        |         |         |
| 4786   | C   | C   | . VAL VAL VAL B B 194 194 . | 0.1359 | 0.1714 | 0.1529 | 0.0098  | 0.0242  |
| 0.0215 | 1   | .   |                             |        |        |        |         |         |
| 4787   | O   | O   | . VAL VAL VAL B B 194 194 . | 0.1314 | 0.2030 | 0.1735 | -0.0051 | 0.0174  |
| 0.0343 | 1   | .   |                             |        |        |        |         |         |
| 4788   | N   | N   | . ILE ILE ILE B B 195 195 . | 0.1428 | 0.1644 | 0.1196 | 0.0210  | 0.0318  |
| 0.0207 | 1   | .   |                             |        |        |        |         |         |
| 4789   | CA  | CA  | . ILE ILE ILE B B 195 195 . | 0.1317 | 0.1991 | 0.1320 | 0.0068  | 0.0328  |
| 0.0086 | 1   | .   |                             |        |        |        |         |         |
| 4790   | CB  | CB  | . ILE ILE ILE B B 195 195 . | 0.1148 | 0.1595 | 0.1578 | 0.0360  | 0.0041  |
| 0.0176 | 1   | .   |                             |        |        |        |         |         |
| 4791   | CG1 | CG1 | . ILE ILE ILE B B 195 195 . | 0.0963 | 0.1696 | 0.1504 | 0.0334  | 0.0037  |
| 0.0687 | 1   | .   |                             |        |        |        |         |         |
| 4792   | CD  | CD  | . ILE ILE ILE B B 195 195 . | 0.0939 | 0.1493 | 0.1187 | 0.0251  | 0.0358  |
| 0.0252 | 1   | .   |                             |        |        |        |         |         |

|        |     |     |                             |        |        |        |         |         |   |
|--------|-----|-----|-----------------------------|--------|--------|--------|---------|---------|---|
| 4793   | CG2 | CG2 | . ILE ILE ILE B B 195 195 . | 0.1902 | 0.1782 | 0.1454 | 0.0104  | 0.0340  |   |
| 0.0199 | 1   | .   |                             |        |        |        |         |         |   |
| 4794   | C   | C   | . ILE ILE ILE B B 195 195 . | 0.1407 | 0.1899 | 0.1677 | 0.0115  | 0.0132  |   |
| 0.0157 | 1   | .   |                             |        |        |        |         |         |   |
| 4795   | O   | O   | . ILE ILE ILE B B 195 195 . | 0.1375 | 0.2356 | 0.1901 | -0.0198 | 0.0213  |   |
| 0.0249 | 1   | .   |                             |        |        |        |         |         |   |
| 4796   | N   | N   | . LYS LYS LYS B B 196 196 . | 0.1685 | 0.2052 | 0.1665 | 0.0313  | -0.0016 |   |
| 0.0158 | 1   | .   |                             |        |        |        |         |         |   |
| 4797   | CA  | CA  | . LYS LYS LYS B B 196 196 . | 0.1449 | 0.2244 | 0.2126 | 0.0279  | -0.0156 |   |
| 0.0318 | 1   | .   |                             |        |        |        |         |         |   |
| 4798   | CB  | CB  | . LYS LYS LYS B B 196 196 . | 0.1861 | 0.2296 | 0.1716 | 0.0384  | -0.0148 |   |
| 0.0329 | 1   | .   |                             |        |        |        |         |         |   |
| 4799   | CG  | CG  | . LYS LYS LYS B B 196 196 . | 0.2356 | 0.2513 | 0.2180 | -0.0047 | -0.0472 |   |
| 0.0806 | 1   | .   |                             |        |        |        |         |         |   |
| 4800   | CD  | CD  | . LYS LYS LYS B B 196 196 . | 0.3027 | 0.3871 | 0.2729 | -0.0378 | -0.0361 |   |
| 0.1297 | 1   | .   |                             |        |        |        |         |         |   |
| 4801   | CE  | CE  | . LYS LYS LYS B B 196 196 . | 0.4040 | 0.4664 | 0.3016 | -0.0657 | -0.0573 |   |
| 0.1057 | 1   | .   |                             |        |        |        |         |         |   |
| 4802   | NZ  | NZ  | . LYS LYS LYS B B 196 196 . | 0.5282 | 0.4627 | 0.4007 | -0.0208 | -0.0417 |   |
| 0.1665 | 1   | .   |                             |        |        |        |         |         |   |
| 4803   | C   | C   | . LYS LYS LYS B B 196 196 . | 0.1809 | 0.2310 | 0.2076 | 0.0148  | 0.0031  |   |
| 0.0203 | 1   | .   |                             |        |        |        |         |         |   |
| 4804   | O   | O   | . LYS LYS LYS B B 196 196 . | 0.1541 | 0.2774 | 0.2240 | 0.0118  | 0.0067  |   |
| 0.0177 | 1   | .   |                             |        |        |        |         |         |   |
| 4805   | N   | N   | . ASP ASP ASP B B 197 197 . | 0.1195 | 0.2261 | 0.1907 | 0.0313  | 0.0176  |   |
| 0.0227 | 1   | .   |                             |        |        |        |         |         |   |
| 4806   | CA  | CA  | . ASP ASP ASP B B 197 197 . | 0.1589 | 0.2423 | 0.2194 | 0.0316  | 0.0192  |   |
| 0.0054 | 1   | .   |                             |        |        |        |         |         |   |
| 4807   | CB  | CB  | . ASP ASP ASP B B 197 197 . | 0.1699 | 0.2824 | 0.2104 | 0.0244  | 0.0445  |   |
| 0.0037 | 1   | .   |                             |        |        |        |         |         |   |
| 4808   | CG  | CG  | . ASP ASP ASP B B 197 197 . | 0.1817 | 0.2620 | 0.2748 | 0.0150  | 0.0015  | - |
| 0.0348 | 1   | .   |                             |        |        |        |         |         |   |
| 4809   | OD1 | OD1 | . ASP ASP ASP B B 197 197 . | 0.3381 | 0.3452 | 0.3549 | 0.0196  | -0.0249 | - |
| 0.0600 | 1   | .   |                             |        |        |        |         |         |   |
| 4810   | OD2 | OD2 | . ASP ASP ASP B B 197 197 . | 0.2546 | 0.3377 | 0.3236 | 0.0017  | 0.0218  |   |
| 0.0340 | 1   | .   |                             |        |        |        |         |         |   |
| 4811   | C   | C   | . ASP ASP ASP B B 197 197 . | 0.1628 | 0.2792 | 0.2088 | 0.0217  | 0.0370  |   |
| 0.0158 | 1   | .   |                             |        |        |        |         |         |   |
| 4812   | O   | O   | . ASP ASP ASP B B 197 197 . | 0.1603 | 0.3560 | 0.2472 | 0.0215  | 0.0101  |   |
| 0.0230 | 1   | .   |                             |        |        |        |         |         |   |
| 4813   | N   | N   | . LYS LYS LYS B B 198 198 . | 0.1574 | 0.2674 | 0.2035 | 0.0092  | 0.0307  |   |
| 0.0404 | 1   | .   |                             |        |        |        |         |         |   |
| 4814   | CA  | CA  | . LYS LYS LYS B B 198 198 . | 0.1375 | 0.2630 | 0.1944 | -0.0074 | 0.0205  |   |
| 0.0334 | 1   | .   |                             |        |        |        |         |         |   |
| 4815   | CB  | CB  | . LYS LYS LYS B B 198 198 . | 0.1582 | 0.2650 | 0.1960 | -0.0073 | 0.0154  |   |
| 0.0425 | 1   | .   |                             |        |        |        |         |         |   |
| 4816   | CG  | CG  | . LYS LYS LYS B B 198 198 . | 0.2164 | 0.2688 | 0.1539 | 0.0082  | 0.0354  |   |
| 0.0302 | 1   | .   |                             |        |        |        |         |         |   |
| 4817   | CD  | CD  | . LYS LYS LYS B B 198 198 . | 0.1947 | 0.3071 | 0.1860 | -0.0491 | 0.0239  |   |
| 0.0596 | 1   | .   |                             |        |        |        |         |         |   |
| 4818   | CE  | CE  | . LYS LYS LYS B B 198 198 . | 0.2246 | 0.2781 | 0.2057 | -0.0824 | -0.0154 |   |
| 0.0855 | 1   | .   |                             |        |        |        |         |         |   |
| 4819   | NZ  | NZ  | . LYS LYS LYS B B 198 198 . | 0.2070 | 0.3618 | 0.2085 | 0.0094  | -0.0047 |   |
| 0.0611 | 1   | .   |                             |        |        |        |         |         |   |
| 4820   | C   | C   | . LYS LYS LYS B B 198 198 . | 0.1816 | 0.2770 | 0.2154 | -0.0226 | 0.0159  |   |
| 0.0252 | 1   | .   |                             |        |        |        |         |         |   |
| 4821   | O   | O   | . LYS LYS LYS B B 198 198 . | 0.1936 | 0.3480 | 0.2347 | -0.0467 | 0.0046  |   |
| 0.0332 | 1   | .   |                             |        |        |        |         |         |   |
| 4822   | N   | N   | . TYR TYR TYR B B 199 199 . | 0.1615 | 0.2828 | 0.1922 | -0.0093 | 0.0207  |   |
| 0.0179 | 1   | .   |                             |        |        |        |         |         |   |



|        |     |     |                             |        |        |        |         |         |
|--------|-----|-----|-----------------------------|--------|--------|--------|---------|---------|
| 4823   | CA  | CA  | . TYR TYR TYR B B 199 199 . | 0.1438 | 0.2181 | 0.1632 | -0.0168 | -0.0063 |
| 0.0272 | 1   | .   |                             |        |        |        |         |         |
| 4824   | CB  | CB  | . TYR TYR TYR B B 199 199 . | 0.1573 | 0.2635 | 0.1740 | -0.0025 | 0.0138  |
| 0.0392 | 1   | .   |                             |        |        |        |         |         |
| 4825   | CG  | CG  | . TYR TYR TYR B B 199 199 . | 0.2139 | 0.2494 | 0.1637 | -0.0742 | -0.0059 |
| 0.0340 | 1   | .   |                             |        |        |        |         |         |
| 4826   | CD1 | CD1 | . TYR TYR TYR B B 199 199 . | 0.1320 | 0.2670 | 0.1360 | 0.0015  | 0.0101  |
| 0.0084 | 1   | .   |                             |        |        |        |         |         |
| 4827   | CE1 | CE1 | . TYR TYR TYR B B 199 199 . | 0.1543 | 0.2212 | 0.1501 | -0.0088 | -0.0100 |
| 0.0481 | 1   | .   |                             |        |        |        |         |         |
| 4828   | CZ  | CZ  | . TYR TYR TYR B B 199 199 . | 0.2405 | 0.2915 | 0.1655 | -0.0634 | 0.0110  |
| 0.0481 | 1   | .   |                             |        |        |        |         |         |
| 4829   | OH  | OH  | . TYR TYR TYR B B 199 199 . | 0.1758 | 0.2840 | 0.1714 | -0.0649 | -0.0151 |
| 0.0795 | 1   | .   |                             |        |        |        |         |         |
| 4830   | CE2 | CE2 | . TYR TYR TYR B B 199 199 . | 0.2295 | 0.3061 | 0.1859 | -0.0995 | 0.0038  |
| 0.0693 | 1   | .   |                             |        |        |        |         |         |
| 4831   | CD2 | CD2 | . TYR TYR TYR B B 199 199 . | 0.2408 | 0.3223 | 0.2199 | -0.1026 | -0.0250 |
| 0.0561 | 1   | .   |                             |        |        |        |         |         |
| 4832   | C   | C   | . TYR TYR TYR B B 199 199 . | 0.1540 | 0.2237 | 0.1733 | -0.0215 | 0.0143  |
| 0.0180 | 1   | .   |                             |        |        |        |         |         |
| 4833   | O   | O   | . TYR TYR TYR B B 199 199 . | 0.2009 | 0.2509 | 0.1716 | -0.0349 | 0.0089  |
| 0.0100 | 1   | .   |                             |        |        |        |         |         |
| 4834   | N   | N   | . GLY GLY GLY B B 200 200 . | 0.1581 | 0.2472 | 0.1450 | 0.0125  | -0.0073 |
| 0.0321 | 1   | .   |                             |        |        |        |         |         |
| 4835   | CA  | CA  | . GLY GLY GLY B B 200 200 . | 0.1471 | 0.2623 | 0.1406 | -0.0059 | 0.0248  |
| 0.0267 | 1   | .   |                             |        |        |        |         |         |
| 4836   | C   | C   | . GLY GLY GLY B B 200 200 . | 0.1613 | 0.2837 | 0.1912 | 0.0108  | 0.0263  |
| 0.0419 | 1   | .   |                             |        |        |        |         |         |
| 4837   | O   | O   | . GLY GLY GLY B B 200 200 . | 0.1660 | 0.2271 | 0.1603 | 0.0047  | 0.0174  |
| 0.0374 | 1   | .   |                             |        |        |        |         |         |
| 4838   | N   | N   | . LYS LYS LYS B B 201 201 . | 0.1873 | 0.2773 | 0.2008 | 0.0117  | 0.0508  |
| 0.0454 | 1   | .   |                             |        |        |        |         |         |
| 4839   | CA  | CA  | . LYS LYS LYS B B 201 201 . | 0.2065 | 0.2973 | 0.2030 | 0.0207  | 0.0483  |
| 0.0542 | 1   | .   |                             |        |        |        |         |         |
| 4840   | CB  | CB  | . LYS LYS LYS B B 201 201 . | 0.2335 | 0.3224 | 0.2181 | 0.0048  | 0.0431  |
| 0.0706 | 1   | .   |                             |        |        |        |         |         |
| 4841   | CG  | CG  | . LYS LYS LYS B B 201 201 . | 0.3532 | 0.3194 | 0.2364 | 0.0206  | 0.0345  |
| 0.0369 | 1   | .   |                             |        |        |        |         |         |
| 4842   | CD  | CD  | . LYS LYS LYS B B 201 201 . | 0.3637 | 0.4380 | 0.2069 | 0.0397  | 0.0616  |
| 0.0290 | 1   | .   |                             |        |        |        |         |         |
| 4843   | CE  | CE  | . LYS LYS LYS B B 201 201 . | 0.3195 | 0.4945 | 0.2417 | 0.0243  | 0.0830  |
| 0.0429 | 1   | .   |                             |        |        |        |         |         |
| 4844   | NZ  | NZ  | . LYS LYS LYS B B 201 201 . | 0.3280 | 0.5967 | 0.3380 | 0.0712  | 0.1172  |
| 0.0354 | 1   | .   |                             |        |        |        |         |         |
| 4845   | C   | C   | . LYS LYS LYS B B 201 201 . | 0.2063 | 0.2342 | 0.1934 | 0.0086  | 0.0157  |
| 0.0341 | 1   | .   |                             |        |        |        |         |         |
| 4846   | O   | O   | . LYS LYS LYS B B 201 201 . | 0.1853 | 0.2447 | 0.1806 | 0.0117  | 0.0500  |
| 0.0530 | 1   | .   |                             |        |        |        |         |         |
| 4847   | N   | N   | . ASP ASP ASP B B 202 202 . | 0.1827 | 0.2462 | 0.1889 | -0.0003 | 0.0324  |
| 0.0264 | 1   | .   |                             |        |        |        |         |         |
| 4848   | CA  | CA  | . ASP ASP ASP B B 202 202 . | 0.1888 | 0.2136 | 0.2031 | -0.0070 | 0.0244  |
| 0.0245 | 1   | .   |                             |        |        |        |         |         |
| 4849   | CB  | CB  | . ASP ASP ASP B B 202 202 . | 0.2182 | 0.2561 | 0.2253 | -0.0171 | -0.0041 |
| 0.0103 | 1   | .   |                             |        |        |        |         |         |
| 4850   | CG  | CG  | . ASP ASP ASP B B 202 202 . | 0.3152 | 0.3340 | 0.3229 | -0.0289 | -0.0286 |
| 0.0216 | 1   | .   |                             |        |        |        |         |         |
| 4851   | OD1 | OD1 | . ASP ASP ASP B B 202 202 . | 0.3768 | 0.4672 | 0.3525 | -0.0514 | 0.0308  |
| 0.1032 | 1   | .   |                             |        |        |        |         |         |
| 4852   | OD2 | OD2 | . ASP ASP ASP B B 202 202 . | 0.3744 | 0.3954 | 0.4531 | -0.0457 | -0.0131 |
| 0.0288 | 1   | .   |                             |        |        |        |         |         |

|        |     |     |                             |        |        |        |         |         |   |
|--------|-----|-----|-----------------------------|--------|--------|--------|---------|---------|---|
| 4853   | C   | C   | . ASP ASP ASP B B 202 202 . | 0.1778 | 0.2086 | 0.1979 | -0.0049 | 0.0155  |   |
| 0.0070 | 1   | .   |                             |        |        |        |         |         |   |
| 4854   | O   | O   | . ASP ASP ASP B B 202 202 . | 0.1993 | 0.2151 | 0.1873 | -0.0082 | 0.0462  |   |
| 0.0295 | 1   | .   |                             |        |        |        |         |         |   |
| 4855   | N   | N   | . ALA ALA ALA B B 203 203 . | 0.1581 | 0.2096 | 0.1688 | -0.0223 | 0.0086  |   |
| 0.0320 | 1   | .   |                             |        |        |        |         |         |   |
| 4856   | CA  | CA  | . ALA ALA ALA B B 203 203 . | 0.1408 | 0.1791 | 0.1440 | -0.0347 | 0.0172  |   |
| 0.0203 | 1   | .   |                             |        |        |        |         |         |   |
| 4857   | CB  | CB  | . ALA ALA ALA B B 203 203 . | 0.1534 | 0.1438 | 0.1578 | -0.0217 | 0.0455  |   |
| 0.0335 | 1   | .   |                             |        |        |        |         |         |   |
| 4858   | C   | C   | . ALA ALA ALA B B 203 203 . | 0.1702 | 0.1601 | 0.1540 | -0.0179 | 0.0044  |   |
| 0.0105 | 1   | .   |                             |        |        |        |         |         |   |
| 4859   | O   | O   | . ALA ALA ALA B B 203 203 . | 0.1515 | 0.1480 | 0.1632 | -0.0101 | 0.0001  |   |
| 0.0431 | 1   | .   |                             |        |        |        |         |         |   |
| 4860   | N   | N   | . THR THR THR B B 204 204 . | 0.1677 | 0.1501 | 0.1584 | -0.0088 | 0.0329  |   |
| 0.0017 | 1   | .   |                             |        |        |        |         |         |   |
| 4861   | CA  | CA  | . THR THR THR B B 204 204 . | 0.1194 | 0.1540 | 0.1689 | 0.0078  | 0.0287  |   |
| 0.0100 | 1   | .   |                             |        |        |        |         |         |   |
| 4862   | CB  | CB  | . THR THR THR B B 204 204 . | 0.1544 | 0.1543 | 0.1849 | 0.0185  | 0.0544  | - |
| 0.0004 | 1   | .   |                             |        |        |        |         |         |   |
| 4863   | OG1 | OG1 | . THR THR THR B B 204 204 . | 0.1668 | 0.2351 | 0.2661 | 0.0282  | 0.0401  |   |
| 0.0430 | 1   | .   |                             |        |        |        |         |         |   |
| 4864   | CG2 | CG2 | . THR THR THR B B 204 204 . | 0.2141 | 0.2288 | 0.2542 | 0.0035  | 0.0833  |   |
| 0.0214 | 1   | .   |                             |        |        |        |         |         |   |
| 4865   | C   | C   | . THR THR THR B B 204 204 . | 0.1336 | 0.1420 | 0.1328 | 0.0083  | 0.0218  |   |
| 0.0031 | 1   | .   |                             |        |        |        |         |         |   |
| 4866   | O   | O   | . THR THR THR B B 204 204 . | 0.1331 | 0.1450 | 0.1609 | 0.0050  | 0.0257  | - |
| 0.0061 | 1   | .   |                             |        |        |        |         |         |   |
| 4867   | N   | N   | . ASN ASN ASN B B 205 205 . | 0.0967 | 0.1168 | 0.1200 | 0.0000  | -0.0061 |   |
| 0.0041 | 1   | .   |                             |        |        |        |         |         |   |
| 4868   | CA  | CA  | . ASN ASN ASN B B 205 205 . | 0.1073 | 0.1101 | 0.0940 | 0.0014  | -0.0061 |   |
| 0.0012 | 1   | .   |                             |        |        |        |         |         |   |
| 4869   | CB  | CB  | . ASN ASN ASN B B 205 205 . | 0.1131 | 0.1184 | 0.1081 | 0.0047  | -0.0246 | - |
| 0.0028 | 1   | .   |                             |        |        |        |         |         |   |
| 4870   | CG  | CG  | . ASN ASN ASN B B 205 205 . | 0.1234 | 0.1094 | 0.1034 | -0.0118 | -0.0230 |   |
| 0.0020 | 1   | .   |                             |        |        |        |         |         |   |
| 4871   | OD1 | OD1 | . ASN ASN ASN B B 205 205 . | 0.1284 | 0.1375 | 0.1323 | 0.0018  | 0.0026  |   |
| 0.0175 | 1   | .   |                             |        |        |        |         |         |   |
| 4872   | ND2 | ND2 | . ASN ASN ASN B B 205 205 . | 0.1507 | 0.1695 | 0.1192 | -0.0432 | 0.0058  | - |
| 0.0344 | 1   | .   |                             |        |        |        |         |         |   |
| 4873   | C   | C   | . ASN ASN ASN B B 205 205 . | 0.0889 | 0.1277 | 0.0979 | -0.0119 | -0.0019 |   |
| 0.0127 | 1   | .   |                             |        |        |        |         |         |   |
| 4874   | O   | O   | . ASN ASN ASN B B 205 205 . | 0.1177 | 0.1431 | 0.1215 | 0.0009  | 0.0079  |   |
| 0.0064 | 1   | .   |                             |        |        |        |         |         |   |
| 4875   | N   | N   | . VAL VAL VAL B B 206 206 . | 0.0712 | 0.1119 | 0.0914 | 0.0076  | 0.0127  |   |
| 0.0155 | 1   | .   |                             |        |        |        |         |         |   |
| 4876   | CA  | CA  | . VAL VAL VAL B B 206 206 . | 0.1035 | 0.0940 | 0.1261 | 0.0050  | -0.0043 | - |
| 0.0032 | 1   | .   |                             |        |        |        |         |         |   |
| 4877   | CB  | CB  | . VAL VAL VAL B B 206 206 . | 0.0888 | 0.1051 | 0.1167 | 0.0032  | 0.0163  | - |
| 0.0112 | 1   | .   |                             |        |        |        |         |         |   |
| 4878   | CG1 | CG1 | . VAL VAL VAL B B 206 206 . | 0.1086 | 0.0884 | 0.1270 | 0.0083  | -0.0097 | - |
| 0.0062 | 1   | .   |                             |        |        |        |         |         |   |
| 4879   | CG2 | CG2 | . VAL VAL VAL B B 206 206 . | 0.1578 | 0.1067 | 0.1310 | -0.0047 | 0.0374  | - |
| 0.0045 | 1   | .   |                             |        |        |        |         |         |   |
| 4880   | C   | C   | . VAL VAL VAL B B 206 206 . | 0.0914 | 0.0945 | 0.1088 | 0.0027  | -0.0001 | - |
| 0.0075 | 1   | .   |                             |        |        |        |         |         |   |
| 4881   | O   | O   | . VAL VAL VAL B B 206 206 . | 0.1198 | 0.0985 | 0.1006 | -0.0118 | -0.0049 | - |
| 0.0042 | 1   | .   |                             |        |        |        |         |         |   |
| 4882   | N   | N   | . GLY GLY GLY B B 207 207 . | 0.0993 | 0.0948 | 0.1012 | -0.0032 | 0.0049  |   |
| 0.0013 | 1   | .   |                             |        |        |        |         |         |   |

|        |     |     |                             |        |        |        |         |         |   |
|--------|-----|-----|-----------------------------|--------|--------|--------|---------|---------|---|
| 4883   | CA  | CA  | . GLY GLY GLY B B 207 207 . | 0.0878 | 0.1112 | 0.1392 | -0.0207 | 0.0173  |   |
| 0.0277 | 1   | .   |                             |        |        |        |         |         |   |
| 4884   | C   | C   | . GLY GLY GLY B B 207 207 . | 0.0729 | 0.0997 | 0.0894 | -0.0045 | -0.0021 |   |
| 0.0314 | 1   | .   |                             |        |        |        |         |         |   |
| 4885   | O   | O   | . GLY GLY GLY B B 207 207 . | 0.0890 | 0.0900 | 0.1040 | 0.0114  | 0.0105  |   |
| 0.0059 | 1   | .   |                             |        |        |        |         |         |   |
| 4886   | N   | N   | . ASP ASP ASP B B 208 208 . | 0.0821 | 0.1005 | 0.1261 | 0.0067  | 0.0200  | - |
| 0.0166 | 1   | .   |                             |        |        |        |         |         |   |
| 4887   | CA  | CA  | . ASP ASP ASP B B 208 208 . | 0.0657 | 0.0958 | 0.0998 | 0.0162  | 0.0082  |   |
| 0.0085 | 1   | .   |                             |        |        |        |         |         |   |
| 4888   | CB  | CB  | . ASP ASP ASP B B 208 208 . | 0.1234 | 0.0654 | 0.0960 | 0.0053  | -0.0191 | - |
| 0.0198 | 1   | .   |                             |        |        |        |         |         |   |
| 4889   | CG  | CG  | . ASP ASP ASP B B 208 208 . | 0.1224 | 0.1240 | 0.1451 | -0.0263 | -0.0204 |   |
| 0.0042 | 1   | .   |                             |        |        |        |         |         |   |
| 4890   | OD1 | OD1 | . ASP ASP ASP B B 208 208 . | 0.1704 | 0.1412 | 0.1703 | 0.0084  | -0.0096 |   |
| 0.0201 | 1   | .   |                             |        |        |        |         |         |   |
| 4891   | OD2 | OD2 | . ASP ASP ASP B B 208 208 . | 0.1667 | 0.1196 | 0.2299 | -0.0027 | -0.0094 |   |
| 0.0323 | 1   | .   |                             |        |        |        |         |         |   |
| 4892   | C   | C   | . ASP ASP ASP B B 208 208 . | 0.0983 | 0.1002 | 0.0878 | 0.0081  | -0.0043 |   |
| 0.0031 | 1   | .   |                             |        |        |        |         |         |   |
| 4893   | O   | O   | . ASP ASP ASP B B 208 208 . | 0.0621 | 0.0970 | 0.0960 | 0.0008  | 0.0032  |   |
| 0.0115 | 1   | .   |                             |        |        |        |         |         |   |
| 4894   | N   | N   | . GLU GLU GLU B B 209 209 . | 0.1090 | 0.0820 | 0.0928 | -0.0066 | 0.0080  |   |
| 0.0032 | 1   | .   |                             |        |        |        |         |         |   |
| 4895   | CA  | CA  | . GLU GLU GLU B B 209 209 . | 0.0986 | 0.0910 | 0.1022 | -0.0120 | -0.0158 | - |
| 0.0016 | 1   | .   |                             |        |        |        |         |         |   |
| 4896   | CB  | CB  | . GLU GLU GLU B B 209 209 . | 0.1113 | 0.1029 | 0.1329 | 0.0158  | -0.0238 | - |
| 0.0155 | 1   | .   |                             |        |        |        |         |         |   |
| 4897   | CG  | CG  | . GLU GLU GLU B B 209 209 . | 0.1069 | 0.1084 | 0.1659 | -0.0070 | -0.0462 | - |
| 0.0095 | 1   | .   |                             |        |        |        |         |         |   |
| 4898   | CD  | CD  | . GLU GLU GLU B B 209 209 . | 0.1542 | 0.1720 | 0.1729 | 0.0351  | -0.0233 | - |
| 0.0208 | 1   | .   |                             |        |        |        |         |         |   |
| 4899   | OE1 | OE1 | . GLU GLU GLU B B 209 209 . | 0.1991 | 0.1596 | 0.1253 | 0.0028  | -0.0186 |   |
| 0.0190 | 1   | .   |                             |        |        |        |         |         |   |
| 4900   | OE2 | OE2 | . GLU GLU GLU B B 209 209 . | 0.2205 | 0.1804 | 0.2115 | 0.0624  | -0.0041 | - |
| 0.0060 | 1   | .   |                             |        |        |        |         |         |   |
| 4901   | C   | C   | . GLU GLU GLU B B 209 209 . | 0.0606 | 0.0903 | 0.1040 | -0.0060 | -0.0055 | - |
| 0.0051 | 1   | .   |                             |        |        |        |         |         |   |
| 4902   | O   | O   | . GLU GLU GLU B B 209 209 . | 0.1090 | 0.0973 | 0.1064 | -0.0064 | -0.0110 | - |
| 0.0113 | 1   | .   |                             |        |        |        |         |         |   |
| 4903   | N   | N   | . GLY GLY GLY B B 210 210 . | 0.0871 | 0.0936 | 0.0894 | 0.0000  | -0.0009 |   |
| 0.0134 | 1   | .   |                             |        |        |        |         |         |   |
| 4904   | CA  | CA  | . GLY GLY GLY B B 210 210 . | 0.0885 | 0.0740 | 0.0890 | 0.0098  | 0.0041  |   |
| 0.0221 | 1   | .   |                             |        |        |        |         |         |   |
| 4905   | C   | C   | . GLY GLY GLY B B 210 210 . | 0.0951 | 0.0839 | 0.0883 | 0.0188  | -0.0035 |   |
| 0.0214 | 1   | .   |                             |        |        |        |         |         |   |
| 4906   | O   | O   | . GLY GLY GLY B B 210 210 . | 0.1164 | 0.1260 | 0.1070 | 0.0319  | 0.0213  |   |
| 0.0028 | 1   | .   |                             |        |        |        |         |         |   |
| 4907   | N   | N   | . GLY GLY GLY B B 211 211 . | 0.0841 | 0.0908 | 0.0679 | 0.0094  | 0.0059  |   |
| 0.0118 | 1   | .   |                             |        |        |        |         |         |   |
| 4908   | CA  | CA  | . GLY GLY GLY B B 211 211 . | 0.0907 | 0.1322 | 0.0880 | 0.0098  | -0.0029 |   |
| 0.0088 | 1   | .   |                             |        |        |        |         |         |   |
| 4909   | C   | C   | . GLY GLY GLY B B 211 211 . | 0.0954 | 0.1018 | 0.0810 | 0.0061  | -0.0031 | - |
| 0.0083 | 1   | .   |                             |        |        |        |         |         |   |
| 4910   | O   | O   | . GLY GLY GLY B B 211 211 . | 0.1092 | 0.0923 | 0.0886 | 0.0000  | -0.0081 | - |
| 0.0171 | 1   | .   |                             |        |        |        |         |         |   |
| 4911   | N   | N   | . PHE PHE PHE B B 212 212 . | 0.0729 | 0.1032 | 0.0870 | -0.0121 | 0.0111  |   |
| 0.0043 | 1   | .   |                             |        |        |        |         |         |   |
| 4912   | CA  | CA  | . PHE PHE PHE B B 212 212 . | 0.0810 | 0.0988 | 0.1001 | -0.0014 | -0.0042 |   |
| 0.0070 | 1   | .   |                             |        |        |        |         |         |   |

|        |     |     |                             |        |        |        |         |         |   |
|--------|-----|-----|-----------------------------|--------|--------|--------|---------|---------|---|
| 4913   | CB  | CB  | . PHE PHE PHE B B 212 212 . | 0.1163 | 0.0980 | 0.1022 | 0.0077  | -0.0067 |   |
| 0.0012 | 1   | .   |                             |        |        |        |         |         |   |
| 4914   | CG  | CG  | . PHE PHE PHE B B 212 212 . | 0.1060 | 0.1215 | 0.1054 | 0.0121  | -0.0104 | - |
| 0.0056 | 1   | .   |                             |        |        |        |         |         |   |
| 4915   | CD1 | CD1 | . PHE PHE PHE B B 212 212 . | 0.0970 | 0.1173 | 0.1552 | -0.0103 | 0.0247  | - |
| 0.0278 | 1   | .   |                             |        |        |        |         |         |   |
| 4916   | CE1 | CE1 | . PHE PHE PHE B B 212 212 . | 0.1265 | 0.1566 | 0.1350 | 0.0032  | 0.0177  |   |
| 0.0054 | 1   | .   |                             |        |        |        |         |         |   |
| 4917   | CZ  | CZ  | . PHE PHE PHE B B 212 212 . | 0.0577 | 0.1306 | 0.1068 | -0.0010 | 0.0120  |   |
| 0.0086 | 1   | .   |                             |        |        |        |         |         |   |
| 4918   | CE2 | CE2 | . PHE PHE PHE B B 212 212 . | 0.1003 | 0.1092 | 0.1429 | 0.0260  | 0.0247  | - |
| 0.0095 | 1   | .   |                             |        |        |        |         |         |   |
| 4919   | CD2 | CD2 | . PHE PHE PHE B B 212 212 . | 0.1158 | 0.1217 | 0.1109 | 0.0185  | 0.0169  |   |
| 0.0037 | 1   | .   |                             |        |        |        |         |         |   |
| 4920   | C   | C   | . PHE PHE PHE B B 212 212 . | 0.1058 | 0.1207 | 0.1064 | -0.0094 | -0.0024 |   |
| 0.0012 | 1   | .   |                             |        |        |        |         |         |   |
| 4921   | O   | O   | . PHE PHE PHE B B 212 212 . | 0.1335 | 0.1244 | 0.1172 | -0.0003 | -0.0159 |   |
| 0.0010 | 1   | .   |                             |        |        |        |         |         |   |
| 4922   | N   | N   | . ALA ALA ALA B B 213 213 . | 0.1022 | 0.1152 | 0.1339 | -0.0179 | 0.0112  | - |
| 0.0186 | 1   | .   |                             |        |        |        |         |         |   |
| 4923   | CA  | CA  | . ALA ALA ALA B B 213 213 . | 0.1373 | 0.1222 | 0.1542 | -0.0164 | 0.0216  |   |
| 0.0005 | 1   | .   |                             |        |        |        |         |         |   |
| 4924   | CB  | CB  | . ALA ALA ALA B B 213 213 . | 0.1905 | 0.1378 | 0.1644 | -0.0357 | 0.0328  | - |
| 0.0285 | 1   | .   |                             |        |        |        |         |         |   |
| 4925   | C   | C   | . ALA ALA ALA B B 213 213 . | 0.1428 | 0.1587 | 0.1367 | -0.0238 | 0.0140  | - |
| 0.0044 | 1   | .   |                             |        |        |        |         |         |   |
| 4926   | O   | O   | . ALA ALA ALA B B 213 213 . | 0.1577 | 0.1688 | 0.1568 | -0.0236 | 0.0173  | - |
| 0.0132 | 1   | .   |                             |        |        |        |         |         |   |
| 4927   | N   | N   | . PRO PRO PRO B B 214 214 . | 0.1202 | 0.1493 | 0.1445 | -0.0164 | 0.0052  | - |
| 0.0026 | 1   | .   |                             |        |        |        |         |         |   |
| 4928   | CA  | CA  | . PRO PRO PRO B B 214 214 . | 0.0991 | 0.1399 | 0.1574 | -0.0118 | 0.0036  |   |
| 0.0026 | 1   | .   |                             |        |        |        |         |         |   |
| 4929   | CB  | CB  | . PRO PRO PRO B B 214 214 . | 0.1345 | 0.1492 | 0.1476 | -0.0050 | 0.0000  | - |
| 0.0027 | 1   | .   |                             |        |        |        |         |         |   |
| 4930   | CG  | CG  | . PRO PRO PRO B B 214 214 . | 0.0984 | 0.1506 | 0.1267 | 0.0016  | 0.0278  |   |
| 0.0209 | 1   | .   |                             |        |        |        |         |         |   |
| 4931   | CD  | CD  | . PRO PRO PRO B B 214 214 . | 0.1598 | 0.1322 | 0.1169 | -0.0322 | 0.0363  | - |
| 0.0216 | 1   | .   |                             |        |        |        |         |         |   |
| 4932   | C   | C   | . PRO PRO PRO B B 214 214 . | 0.1319 | 0.1391 | 0.1417 | -0.0098 | -0.0075 |   |
| 0.0125 | 1   | .   |                             |        |        |        |         |         |   |
| 4933   | O   | O   | . PRO PRO PRO B B 214 214 . | 0.1353 | 0.1553 | 0.1581 | -0.0105 | 0.0057  |   |
| 0.0093 | 1   | .   |                             |        |        |        |         |         |   |
| 4934   | N   | N   | . ASN ASN ASN B B 215 215 . | 0.1074 | 0.1465 | 0.1481 | -0.0225 | -0.0055 | - |
| 0.0115 | 1   | .   |                             |        |        |        |         |         |   |
| 4935   | CA  | CA  | . ASN ASN ASN B B 215 215 . | 0.1473 | 0.1776 | 0.1609 | -0.0293 | -0.0056 |   |
| 0.0092 | 1   | .   |                             |        |        |        |         |         |   |
| 4936   | CB  | CB  | . ASN ASN ASN B B 215 215 . | 0.1929 | 0.2108 | 0.1681 | -0.0174 | -0.0229 | - |
| 0.0366 | 1   | .   |                             |        |        |        |         |         |   |
| 4937   | CG  | CG  | . ASN ASN ASN B B 215 215 . | 0.3438 | 0.3705 | 0.3976 | 0.0006  | -0.0214 | - |
| 0.0535 | 1   | .   |                             |        |        |        |         |         |   |
| 4938   | OD1 | OD1 | . ASN ASN ASN B B 215 215 . | 0.5292 | 0.4894 | 0.5456 | -0.0434 | -0.0709 | - |
| 0.0849 | 1   | .   |                             |        |        |        |         |         |   |
| 4939   | ND2 | ND2 | . ASN ASN ASN B B 215 215 . | 0.5461 | 0.4459 | 0.5082 | -0.0035 | -0.0370 | - |
| 0.0876 | 1   | .   |                             |        |        |        |         |         |   |
| 4940   | C   | C   | . ASN ASN ASN B B 215 215 . | 0.1370 | 0.1961 | 0.1488 | -0.0020 | -0.0111 |   |
| 0.0036 | 1   | .   |                             |        |        |        |         |         |   |
| 4941   | O   | O   | . ASN ASN ASN B B 215 215 . | 0.1874 | 0.2326 | 0.1542 | -0.0286 | -0.0146 |   |
| 0.0250 | 1   | .   |                             |        |        |        |         |         |   |
| 4942   | N   | N   | . ILE ILE ILE B B 216 216 . | 0.1781 | 0.2267 | 0.1386 | -0.0301 | -0.0121 | - |
| 0.0091 | 1   | .   |                             |        |        |        |         |         |   |



|        |     |     |                             |        |        |        |         |         |   |
|--------|-----|-----|-----------------------------|--------|--------|--------|---------|---------|---|
| 4973   | C   | C   | . ASN ASN ASN B B 219 219 . | 0.1450 | 0.1194 | 0.1068 | 0.0004  | 0.0289  | - |
| 0.0167 | 1   | .   |                             |        |        |        |         |         |   |
| 4974   | O   | O   | . ASN ASN ASN B B 219 219 . | 0.1395 | 0.1376 | 0.1168 | -0.0232 | 0.0087  |   |
| 0.0004 | 1   | .   |                             |        |        |        |         |         |   |
| 4975   | N   | N   | . SER SER SER B B 220 220 . | 0.1290 | 0.1313 | 0.1217 | 0.0165  | 0.0147  |   |
| 0.0067 | 1   | .   |                             |        |        |        |         |         |   |
| 4976   | CA  | CA  | . SER SER SER B B 220 220 . | 0.1604 | 0.1297 | 0.1371 | -0.0040 | 0.0192  |   |
| 0.0214 | 1   | .   |                             |        |        |        |         |         |   |
| 4977   | CB  | CB  | . SER SER SER B B 220 220 . | 0.1967 | 0.1356 | 0.1357 | -0.0147 | 0.0230  |   |
| 0.0370 | 1   | .   |                             |        |        |        |         |         |   |
| 4978   | OG  | OG  | . SER SER SER B B 220 220 . | 0.1939 | 0.2271 | 0.2004 | -0.0285 | 0.0431  |   |
| 0.0166 | 1   | .   |                             |        |        |        |         |         |   |
| 4979   | C   | C   | . SER SER SER B B 220 220 . | 0.1223 | 0.1441 | 0.1187 | -0.0114 | 0.0088  |   |
| 0.0013 | 1   | .   |                             |        |        |        |         |         |   |
| 4980   | O   | O   | . SER SER SER B B 220 220 . | 0.1366 | 0.1376 | 0.1143 | 0.0137  | 0.0090  |   |
| 0.0183 | 1   | .   |                             |        |        |        |         |         |   |
| 4981   | N   | N   | . GLU GLU GLU B B 221 221 . | 0.1323 | 0.1607 | 0.1178 | -0.0199 | 0.0047  |   |
| 0.0222 | 1   | .   |                             |        |        |        |         |         |   |
| 4982   | CA  | CA  | . GLU GLU GLU B B 221 221 . | 0.1234 | 0.1364 | 0.1309 | -0.0160 | 0.0104  |   |
| 0.0180 | 1   | .   |                             |        |        |        |         |         |   |
| 4983   | CB  | CB  | . GLU GLU GLU B B 221 221 . | 0.1523 | 0.1922 | 0.1204 | 0.0007  | -0.0126 |   |
| 0.0096 | 1   | .   |                             |        |        |        |         |         |   |
| 4984   | CG  | CG  | . GLU GLU GLU B B 221 221 . | 0.1728 | 0.1846 | 0.1859 | -0.0316 | -0.0174 |   |
| 0.0411 | 1   | .   |                             |        |        |        |         |         |   |
| 4985   | CD  | CD  | . GLU GLU GLU B B 221 221 . | 0.1833 | 0.3274 | 0.2497 | -0.0049 | 0.0458  |   |
| 0.0679 | 1   | .   |                             |        |        |        |         |         |   |
| 4986   | OE1 | OE1 | . GLU GLU GLU B B 221 221 . | 0.1625 | 0.4763 | 0.2630 | 0.0512  | 0.0286  |   |
| 0.0448 | 1   | .   |                             |        |        |        |         |         |   |
| 4987   | OE2 | OE2 | . GLU GLU GLU B B 221 221 . | 0.2093 | 0.2881 | 0.2353 | -0.0488 | 0.0241  |   |
| 0.0726 | 1   | .   |                             |        |        |        |         |         |   |
| 4988   | C   | C   | . GLU GLU GLU B B 221 221 . | 0.1189 | 0.1392 | 0.1456 | -0.0214 | 0.0079  |   |
| 0.0001 | 1   | .   |                             |        |        |        |         |         |   |
| 4989   | O   | O   | . GLU GLU GLU B B 221 221 . | 0.1197 | 0.1686 | 0.1472 | -0.0107 | 0.0137  |   |
| 0.0133 | 1   | .   |                             |        |        |        |         |         |   |
| 4990   | N   | N   | . ALA ALA ALA B B 222 222 . | 0.1240 | 0.1233 | 0.1416 | -0.0177 | 0.0053  | - |
| 0.0082 | 1   | .   |                             |        |        |        |         |         |   |
| 4991   | CA  | CA  | . ALA ALA ALA B B 222 222 . | 0.1232 | 0.1226 | 0.1220 | -0.0130 | 0.0118  |   |
| 0.0013 | 1   | .   |                             |        |        |        |         |         |   |
| 4992   | CB  | CB  | . ALA ALA ALA B B 222 222 . | 0.1341 | 0.1138 | 0.1117 | 0.0035  | 0.0111  | - |
| 0.0038 | 1   | .   |                             |        |        |        |         |         |   |
| 4993   | C   | C   | . ALA ALA ALA B B 222 222 . | 0.1341 | 0.1217 | 0.0970 | -0.0171 | 0.0174  |   |
| 0.0020 | 1   | .   |                             |        |        |        |         |         |   |
| 4994   | O   | O   | . ALA ALA ALA B B 222 222 . | 0.1481 | 0.1201 | 0.1062 | 0.0062  | 0.0112  |   |
| 0.0005 | 1   | .   |                             |        |        |        |         |         |   |
| 4995   | N   | N   | . LEU LEU LEU B B 223 223 . | 0.1176 | 0.1367 | 0.1172 | -0.0062 | 0.0022  | - |
| 0.0032 | 1   | .   |                             |        |        |        |         |         |   |
| 4996   | CA  | CA  | . LEU LEU LEU B B 223 223 . | 0.1382 | 0.1188 | 0.0692 | 0.0052  | 0.0121  | - |
| 0.0042 | 1   | .   |                             |        |        |        |         |         |   |
| 4997   | CB  | CB  | . LEU LEU LEU B B 223 223 . | 0.1270 | 0.1312 | 0.1211 | 0.0243  | -0.0150 |   |
| 0.0273 | 1   | .   |                             |        |        |        |         |         |   |
| 4998   | CG  | CG  | . LEU LEU LEU B B 223 223 . | 0.1452 | 0.1044 | 0.1236 | 0.0070  | 0.0177  |   |
| 0.0152 | 1   | .   |                             |        |        |        |         |         |   |
| 4999   | CD1 | CD1 | . LEU LEU LEU B B 223 223 . | 0.1906 | 0.1432 | 0.1208 | 0.0083  | 0.0009  |   |
| 0.0553 | 1   | .   |                             |        |        |        |         |         |   |
| 5000   | CD2 | CD2 | . LEU LEU LEU B B 223 223 . | 0.1227 | 0.1241 | 0.1314 | -0.0025 | 0.0275  |   |
| 0.0045 | 1   | .   |                             |        |        |        |         |         |   |
| 5001   | C   | C   | . LEU LEU LEU B B 223 223 . | 0.1297 | 0.1358 | 0.1035 | -0.0132 | -0.0007 |   |
| 0.0112 | 1   | .   |                             |        |        |        |         |         |   |
| 5002   | O   | O   | . LEU LEU LEU B B 223 223 . | 0.1299 | 0.1062 | 0.1219 | -0.0092 | 0.0123  | - |
| 0.0068 | 1   | .   |                             |        |        |        |         |         |   |

|        |     |     |                             |        |        |        |         |         |   |
|--------|-----|-----|-----------------------------|--------|--------|--------|---------|---------|---|
| 5003   | N   | N   | . GLU GLU GLU B B 224 224 . | 0.1245 | 0.1300 | 0.1095 | -0.0022 | 0.0120  | - |
| 0.0014 | 1   | .   |                             |        |        |        |         |         |   |
| 5004   | CA  | CA  | . GLU GLU GLU B B 224 224 . | 0.1152 | 0.1244 | 0.1232 | -0.0042 | 0.0214  |   |
| 0.0288 | 1   | .   |                             |        |        |        |         |         |   |
| 5005   | CB  | CB  | . GLU GLU GLU B B 224 224 . | 0.1110 | 0.1543 | 0.1340 | 0.0100  | 0.0140  |   |
| 0.0062 | 1   | .   |                             |        |        |        |         |         |   |
| 5006   | CG  | CG  | . GLU GLU GLU B B 224 224 . | 0.2112 | 0.1944 | 0.2699 | 0.0253  | 0.0568  |   |
| 0.0238 | 1   | .   |                             |        |        |        |         |         |   |
| 5007   | CD  | CD  | . GLU GLU GLU B B 224 224 . | 0.3541 | 0.3618 | 0.3116 | -0.0127 | 0.0761  | - |
| 0.0145 | 1   | .   |                             |        |        |        |         |         |   |
| 5008   | OE1 | OE1 | . GLU GLU GLU B B 224 224 . | 0.4058 | 0.4181 | 0.4414 | -0.0509 | 0.1220  | - |
| 0.0160 | 1   | .   |                             |        |        |        |         |         |   |
| 5009   | OE2 | OE2 | . GLU GLU GLU B B 224 224 . | 0.4137 | 0.3704 | 0.4604 | 0.0148  | 0.0256  |   |
| 0.0002 | 1   | .   |                             |        |        |        |         |         |   |
| 5010   | C   | C   | . GLU GLU GLU B B 224 224 . | 0.1246 | 0.1218 | 0.1069 | 0.0053  | -0.0041 |   |
| 0.0124 | 1   | .   |                             |        |        |        |         |         |   |
| 5011   | O   | O   | . GLU GLU GLU B B 224 224 . | 0.1811 | 0.1401 | 0.1384 | -0.0059 | 0.0247  |   |
| 0.0253 | 1   | .   |                             |        |        |        |         |         |   |
| 5012   | N   | N   | . LEU LEU LEU B B 225 225 . | 0.1201 | 0.1216 | 0.1105 | 0.0146  | 0.0252  |   |
| 0.0141 | 1   | .   |                             |        |        |        |         |         |   |
| 5013   | CA  | CA  | . LEU LEU LEU B B 225 225 . | 0.1402 | 0.1513 | 0.1319 | 0.0092  | 0.0154  |   |
| 0.0215 | 1   | .   |                             |        |        |        |         |         |   |
| 5014   | CB  | CB  | . LEU LEU LEU B B 225 225 . | 0.1204 | 0.1504 | 0.1448 | -0.0155 | 0.0014  | - |
| 0.0107 | 1   | .   |                             |        |        |        |         |         |   |
| 5015   | CG  | CG  | . LEU LEU LEU B B 225 225 . | 0.1414 | 0.1583 | 0.1707 | 0.0063  | -0.0381 | - |
| 0.0034 | 1   | .   |                             |        |        |        |         |         |   |
| 5016   | CD1 | CD1 | . LEU LEU LEU B B 225 225 . | 0.1799 | 0.1969 | 0.1481 | -0.0076 | 0.0211  | - |
| 0.0054 | 1   | .   |                             |        |        |        |         |         |   |
| 5017   | CD2 | CD2 | . LEU LEU LEU B B 225 225 . | 0.1355 | 0.2078 | 0.2188 | 0.0232  | -0.0599 |   |
| 0.0304 | 1   | .   |                             |        |        |        |         |         |   |
| 5018   | C   | C   | . LEU LEU LEU B B 225 225 . | 0.0983 | 0.1065 | 0.1118 | 0.0206  | 0.0133  |   |
| 0.0095 | 1   | .   |                             |        |        |        |         |         |   |
| 5019   | O   | O   | . LEU LEU LEU B B 225 225 . | 0.1284 | 0.1340 | 0.1263 | 0.0183  | 0.0331  |   |
| 0.0310 | 1   | .   |                             |        |        |        |         |         |   |
| 5020   | N   | N   | . VAL VAL VAL B B 226 226 . | 0.1137 | 0.1436 | 0.1067 | 0.0023  | 0.0094  |   |
| 0.0025 | 1   | .   |                             |        |        |        |         |         |   |
| 5021   | CA  | CA  | . VAL VAL VAL B B 226 226 . | 0.1111 | 0.1117 | 0.1086 | 0.0049  | 0.0138  |   |
| 0.0124 | 1   | .   |                             |        |        |        |         |         |   |
| 5022   | CB  | CB  | . VAL VAL VAL B B 226 226 . | 0.1129 | 0.1189 | 0.0918 | 0.0017  | 0.0060  | - |
| 0.0049 | 1   | .   |                             |        |        |        |         |         |   |
| 5023   | CG1 | CG1 | . VAL VAL VAL B B 226 226 . | 0.0968 | 0.1296 | 0.1516 | -0.0098 | -0.0168 | - |
| 0.0042 | 1   | .   |                             |        |        |        |         |         |   |
| 5024   | CG2 | CG2 | . VAL VAL VAL B B 226 226 . | 0.1303 | 0.1226 | 0.1102 | -0.0014 | 0.0144  | - |
| 0.0403 | 1   | .   |                             |        |        |        |         |         |   |
| 5025   | C   | C   | . VAL VAL VAL B B 226 226 . | 0.1245 | 0.1103 | 0.1176 | -0.0147 | 0.0204  |   |
| 0.0168 | 1   | .   |                             |        |        |        |         |         |   |
| 5026   | O   | O   | . VAL VAL VAL B B 226 226 . | 0.1295 | 0.1184 | 0.1376 | 0.0013  | 0.0249  |   |
| 0.0257 | 1   | .   |                             |        |        |        |         |         |   |
| 5027   | N   | N   | . LYS LYS LYS B B 227 227 . | 0.1463 | 0.1305 | 0.0984 | 0.0091  | 0.0223  |   |
| 0.0204 | 1   | .   |                             |        |        |        |         |         |   |
| 5028   | CA  | CA  | . LYS LYS LYS B B 227 227 . | 0.1450 | 0.1181 | 0.1040 | 0.0208  | 0.0246  |   |
| 0.0131 | 1   | .   |                             |        |        |        |         |         |   |
| 5029   | CB  | CB  | . LYS LYS LYS B B 227 227 . | 0.1822 | 0.1308 | 0.1184 | 0.0258  | 0.0301  |   |
| 0.0161 | 1   | .   |                             |        |        |        |         |         |   |
| 5030   | CG  | CG  | . LYS LYS LYS B B 227 227 . | 0.2001 | 0.1554 | 0.1348 | 0.0139  | 0.0310  |   |
| 0.0089 | 1   | .   |                             |        |        |        |         |         |   |
| 5031   | CD  | CD  | . LYS LYS LYS B B 227 227 . | 0.3018 | 0.2299 | 0.1877 | 0.0401  | 0.0438  |   |
| 0.0654 | 1   | .   |                             |        |        |        |         |         |   |
| 5032   | CE  | CE  | . LYS LYS LYS B B 227 227 . | 0.4017 | 0.3702 | 0.3465 | 0.0444  | 0.0459  | - |
| 0.0527 | 1   | .   |                             |        |        |        |         |         |   |

|        |     |     |                             |        |        |        |         |        |   |
|--------|-----|-----|-----------------------------|--------|--------|--------|---------|--------|---|
| 5033   | NZ  | NZ  | . LYS LYS LYS B B 227 227 . | 0.4348 | 0.5503 | 0.4917 | 0.0208  | 0.0113 |   |
| 0.0107 | 1   | .   |                             |        |        |        |         |        |   |
| 5034   | C   | C   | . LYS LYS LYS B B 227 227 . | 0.1285 | 0.1262 | 0.1015 | -0.0030 | 0.0513 |   |
| 0.0127 | 1   | .   |                             |        |        |        |         |        |   |
| 5035   | O   | O   | . LYS LYS LYS B B 227 227 . | 0.1879 | 0.1481 | 0.1346 | 0.0203  | 0.0550 |   |
| 0.0054 | 1   | .   |                             |        |        |        |         |        |   |
| 5036   | N   | N   | . GLU GLU GLU B B 228 228 . | 0.1381 | 0.1513 | 0.1264 | 0.0232  | 0.0369 |   |
| 0.0282 | 1   | .   |                             |        |        |        |         |        |   |
| 5037   | CA  | CA  | . GLU GLU GLU B B 228 228 . | 0.1665 | 0.1503 | 0.1689 | 0.0218  | 0.0257 |   |
| 0.0318 | 1   | .   |                             |        |        |        |         |        |   |
| 5038   | CB  | CB  | . GLU GLU GLU B B 228 228 . | 0.1465 | 0.1571 | 0.1758 | 0.0462  | 0.0228 |   |
| 0.0279 | 1   | .   |                             |        |        |        |         |        |   |
| 5039   | CG  | CG  | . GLU GLU GLU B B 228 228 . | 0.1435 | 0.1871 | 0.2181 | 0.0704  | 0.0378 |   |
| 0.0319 | 1   | .   |                             |        |        |        |         |        |   |
| 5040   | CD  | CD  | . GLU GLU GLU B B 228 228 . | 0.3194 | 0.3774 | 0.3775 | 0.0155  | 0.0205 |   |
| 0.0159 | 1   | .   |                             |        |        |        |         |        |   |
| 5041   | OE1 | OE1 | . GLU GLU GLU B B 228 228 . | 0.4230 | 0.4324 | 0.4889 | 0.0900  | 0.0540 |   |
| 0.0164 | 1   | .   |                             |        |        |        |         |        |   |
| 5042   | OE2 | OE2 | . GLU GLU GLU B B 228 228 . | 0.4093 | 0.4123 | 0.4786 | 0.0388  | 0.0756 |   |
| 0.0137 | 1   | .   |                             |        |        |        |         |        |   |
| 5043   | C   | C   | . GLU GLU GLU B B 228 228 . | 0.1736 | 0.1407 | 0.1637 | 0.0106  | 0.0447 |   |
| 0.0146 | 1   | .   |                             |        |        |        |         |        |   |
| 5044   | O   | O   | . GLU GLU GLU B B 228 228 . | 0.1402 | 0.1473 | 0.1978 | 0.0211  | 0.0355 |   |
| 0.0136 | 1   | .   |                             |        |        |        |         |        |   |
| 5045   | N   | N   | . ALA ALA ALA B B 229 229 . | 0.1382 | 0.1372 | 0.1388 | 0.0104  | 0.0492 |   |
| 0.0218 | 1   | .   |                             |        |        |        |         |        |   |
| 5046   | CA  | CA  | . ALA ALA ALA B B 229 229 . | 0.1569 | 0.1245 | 0.1189 | -0.0041 | 0.0365 |   |
| 0.0150 | 1   | .   |                             |        |        |        |         |        |   |
| 5047   | CB  | CB  | . ALA ALA ALA B B 229 229 . | 0.1265 | 0.1611 | 0.1059 | 0.0463  | 0.0453 |   |
| 0.0158 | 1   | .   |                             |        |        |        |         |        |   |
| 5048   | C   | C   | . ALA ALA ALA B B 229 229 . | 0.1375 | 0.1353 | 0.1317 | 0.0020  | 0.0150 |   |
| 0.0162 | 1   | .   |                             |        |        |        |         |        |   |
| 5049   | O   | O   | . ALA ALA ALA B B 229 229 . | 0.1599 | 0.1315 | 0.1352 | 0.0130  | 0.0122 |   |
| 0.0068 | 1   | .   |                             |        |        |        |         |        |   |
| 5050   | N   | N   | . ILE ILE ILE B B 230 230 . | 0.1298 | 0.1324 | 0.1106 | 0.0157  | 0.0178 |   |
| 0.0065 | 1   | .   |                             |        |        |        |         |        |   |
| 5051   | CA  | CA  | . ILE ILE ILE B B 230 230 . | 0.1393 | 0.1195 | 0.1161 | 0.0075  | 0.0200 |   |
| 0.0199 | 1   | .   |                             |        |        |        |         |        |   |
| 5052   | CB  | CB  | . ILE ILE ILE B B 230 230 . | 0.1419 | 0.1181 | 0.1163 | 0.0312  | 0.0203 | - |
| 0.0017 | 1   | .   |                             |        |        |        |         |        |   |
| 5053   | CG1 | CG1 | . ILE ILE ILE B B 230 230 . | 0.1189 | 0.1021 | 0.1455 | 0.0134  | 0.0311 |   |
| 0.0073 | 1   | .   |                             |        |        |        |         |        |   |
| 5054   | CD  | CD  | . ILE ILE ILE B B 230 230 . | 0.1588 | 0.0936 | 0.1103 | 0.0112  | 0.0111 |   |
| 0.0167 | 1   | .   |                             |        |        |        |         |        |   |
| 5055   | CG2 | CG2 | . ILE ILE ILE B B 230 230 . | 0.1594 | 0.1371 | 0.1371 | 0.0043  | 0.0001 | - |
| 0.0111 | 1   | .   |                             |        |        |        |         |        |   |
| 5056   | C   | C   | . ILE ILE ILE B B 230 230 . | 0.1677 | 0.1450 | 0.1592 | 0.0106  | 0.0062 |   |
| 0.0078 | 1   | .   |                             |        |        |        |         |        |   |
| 5057   | O   | O   | . ILE ILE ILE B B 230 230 . | 0.1545 | 0.1305 | 0.1399 | 0.0061  | 0.0337 | - |
| 0.0012 | 1   | .   |                             |        |        |        |         |        |   |
| 5058   | N   | N   | . ASP ASP ASP B B 231 231 . | 0.1691 | 0.1722 | 0.1648 | 0.0355  | 0.0332 |   |
| 0.0037 | 1   | .   |                             |        |        |        |         |        |   |
| 5059   | CA  | CA  | . ASP ASP ASP B B 231 231 . | 0.1878 | 0.1710 | 0.1477 | 0.0291  | 0.0444 |   |
| 0.0191 | 1   | .   |                             |        |        |        |         |        |   |
| 5060   | CB  | CB  | . ASP ASP ASP B B 231 231 . | 0.1947 | 0.1988 | 0.1761 | 0.0164  | 0.0569 | - |
| 0.0054 | 1   | .   |                             |        |        |        |         |        |   |
| 5061   | CG  | CG  | . ASP ASP ASP B B 231 231 . | 0.3386 | 0.3606 | 0.3166 | 0.0444  | 0.0567 | - |
| 0.0195 | 1   | .   |                             |        |        |        |         |        |   |
| 5062   | OD1 | OD1 | . ASP ASP ASP B B 231 231 . | 0.4909 | 0.4647 | 0.4377 | -0.0408 | 0.0436 | - |
| 0.0390 | 1   | .   |                             |        |        |        |         |        |   |



|        |     |     |                             |        |        |        |         |        |   |
|--------|-----|-----|-----------------------------|--------|--------|--------|---------|--------|---|
| 5063   | OD2 | OD2 | . ASP ASP ASP B B 231 231 . | 0.3900 | 0.5160 | 0.5152 | 0.0454  | 0.0563 |   |
| 0.0029 | 1   | .   |                             |        |        |        |         |        |   |
| 5064   | C   | C   | . ASP ASP ASP B B 231 231 . | 0.1587 | 0.1790 | 0.1737 | 0.0317  | 0.0350 |   |
| 0.0096 | 1   | .   |                             |        |        |        |         |        |   |
| 5065   | O   | O   | . ASP ASP ASP B B 231 231 . | 0.2165 | 0.1738 | 0.1881 | 0.0433  | 0.0367 |   |
| 0.0087 | 1   | .   |                             |        |        |        |         |        |   |
| 5066   | N   | N   | . LYS LYS LYS B B 232 232 . | 0.1653 | 0.1772 | 0.1684 | 0.0301  | 0.0555 |   |
| 0.0154 | 1   | .   |                             |        |        |        |         |        |   |
| 5067   | CA  | CA  | . LYS LYS LYS B B 232 232 . | 0.1703 | 0.1862 | 0.1858 | 0.0283  | 0.0299 |   |
| 0.0071 | 1   | .   |                             |        |        |        |         |        |   |
| 5068   | CB  | CB  | . LYS LYS LYS B B 232 232 . | 0.2249 | 0.2039 | 0.1961 | 0.0154  | 0.0098 |   |
| 0.0137 | 1   | .   |                             |        |        |        |         |        |   |
| 5069   | CG  | CG  | . LYS LYS LYS B B 232 232 . | 0.2727 | 0.2627 | 0.2516 | 0.0533  | 0.0335 |   |
| 0.0318 | 1   | .   |                             |        |        |        |         |        |   |
| 5070   | CD  | CD  | . LYS LYS LYS B B 232 232 . | 0.3255 | 0.3161 | 0.3728 | 0.0228  | 0.0282 | - |
| 0.0135 | 1   | .   |                             |        |        |        |         |        |   |
| 5071   | CE  | CE  | . LYS LYS LYS B B 232 232 . | 0.4571 | 0.4701 | 0.5057 | -0.0042 | 0.0382 |   |
| 0.0379 | 1   | .   |                             |        |        |        |         |        |   |
| 5072   | NZ  | NZ  | . LYS LYS LYS B B 232 232 . | 0.6191 | 0.5470 | 0.5310 | 0.0249  | 0.0102 |   |
| 0.0481 | 1   | .   |                             |        |        |        |         |        |   |
| 5073   | C   | C   | . LYS LYS LYS B B 232 232 . | 0.1846 | 0.1785 | 0.1977 | 0.0252  | 0.0231 |   |
| 0.0130 | 1   | .   |                             |        |        |        |         |        |   |
| 5074   | O   | O   | . LYS LYS LYS B B 232 232 . | 0.1943 | 0.1668 | 0.2179 | 0.0301  | 0.0273 |   |
| 0.0231 | 1   | .   |                             |        |        |        |         |        |   |
| 5075   | N   | N   | . ALA ALA ALA B B 233 233 . | 0.1507 | 0.1741 | 0.1588 | 0.0056  | 0.0212 |   |
| 0.0056 | 1   | .   |                             |        |        |        |         |        |   |
| 5076   | CA  | CA  | . ALA ALA ALA B B 233 233 . | 0.1389 | 0.1439 | 0.1810 | 0.0242  | 0.0346 | - |
| 0.0072 | 1   | .   |                             |        |        |        |         |        |   |
| 5077   | CB  | CB  | . ALA ALA ALA B B 233 233 . | 0.1580 | 0.1379 | 0.1809 | 0.0631  | 0.0444 | - |
| 0.0041 | 1   | .   |                             |        |        |        |         |        |   |
| 5078   | C   | C   | . ALA ALA ALA B B 233 233 . | 0.1610 | 0.1445 | 0.1720 | 0.0220  | 0.0347 | - |
| 0.0150 | 1   | .   |                             |        |        |        |         |        |   |
| 5079   | O   | O   | . ALA ALA ALA B B 233 233 . | 0.2298 | 0.1804 | 0.1943 | 0.0040  | 0.0611 | - |
| 0.0040 | 1   | .   |                             |        |        |        |         |        |   |
| 5080   | N   | N   | . GLY GLY GLY B B 234 234 . | 0.1974 | 0.1491 | 0.1832 | 0.0265  | 0.0229 |   |
| 0.0031 | 1   | .   |                             |        |        |        |         |        |   |
| 5081   | CA  | CA  | . GLY GLY GLY B B 234 234 . | 0.2182 | 0.1748 | 0.1965 | 0.0246  | 0.0127 | - |
| 0.0054 | 1   | .   |                             |        |        |        |         |        |   |
| 5082   | C   | C   | . GLY GLY GLY B B 234 234 . | 0.2085 | 0.1514 | 0.1680 | 0.0182  | 0.0115 | - |
| 0.0080 | 1   | .   |                             |        |        |        |         |        |   |
| 5083   | O   | O   | . GLY GLY GLY B B 234 234 . | 0.2312 | 0.1526 | 0.1954 | 0.0226  | 0.0114 |   |
| 0.0008 | 1   | .   |                             |        |        |        |         |        |   |
| 5084   | N   | N   | . TYR TYR TYR B B 235 235 . | 0.2013 | 0.1420 | 0.1434 | 0.0513  | 0.0286 |   |
| 0.0020 | 1   | .   |                             |        |        |        |         |        |   |
| 5085   | CA  | CA  | . TYR TYR TYR B B 235 235 . | 0.1611 | 0.1443 | 0.1289 | 0.0245  | 0.0418 | - |
| 0.0197 | 1   | .   |                             |        |        |        |         |        |   |
| 5086   | CB  | CB  | . TYR TYR TYR B B 235 235 . | 0.1661 | 0.1597 | 0.0933 | 0.0296  | 0.0525 |   |
| 0.0166 | 1   | .   |                             |        |        |        |         |        |   |
| 5087   | CG  | CG  | . TYR TYR TYR B B 235 235 . | 0.1651 | 0.1190 | 0.1562 | -0.0229 | 0.0416 | - |
| 0.0079 | 1   | .   |                             |        |        |        |         |        |   |
| 5088   | CD1 | CD1 | . TYR TYR TYR B B 235 235 . | 0.1844 | 0.1200 | 0.1394 | 0.0424  | 0.0011 |   |
| 0.0039 | 1   | .   |                             |        |        |        |         |        |   |
| 5089   | CE1 | CE1 | . TYR TYR TYR B B 235 235 . | 0.1784 | 0.1756 | 0.1794 | -0.0162 | 0.0251 |   |
| 0.0170 | 1   | .   |                             |        |        |        |         |        |   |
| 5090   | CZ  | CZ  | . TYR TYR TYR B B 235 235 . | 0.1525 | 0.1710 | 0.1960 | 0.0240  | 0.0325 |   |
| 0.0173 | 1   | .   |                             |        |        |        |         |        |   |
| 5091   | OH  | OH  | . TYR TYR TYR B B 235 235 . | 0.2422 | 0.1547 | 0.1833 | 0.0181  | 0.0556 |   |
| 0.0202 | 1   | .   |                             |        |        |        |         |        |   |
| 5092   | CE2 | CE2 | . TYR TYR TYR B B 235 235 . | 0.1724 | 0.1716 | 0.2112 | 0.0209  | 0.0248 |   |
| 0.0292 | 1   | .   |                             |        |        |        |         |        |   |





|        |     |     |                             |        |        |        |         |         |   |
|--------|-----|-----|-----------------------------|--------|--------|--------|---------|---------|---|
| 5153   | CE  | CE  | . MET MET MET B B 243 243 . | 0.1485 | 0.1535 | 0.1601 | -0.0713 | 0.0108  | - |
| 0.0268 | 1   | .   |                             |        |        |        |         |         |   |
| 5154   | C   | C   | . MET MET MET B B 243 243 . | 0.0958 | 0.0902 | 0.0775 | 0.0032  | -0.0080 |   |
| 0.0013 | 1   | .   |                             |        |        |        |         |         |   |
| 5155   | O   | O   | . MET MET MET B B 243 243 . | 0.1037 | 0.1058 | 0.1104 | 0.0106  | -0.0209 |   |
| 0.0069 | 1   | .   |                             |        |        |        |         |         |   |
| 5156   | N   | N   | . ASP ASP ASP B B 244 244 . | 0.1173 | 0.0924 | 0.0778 | 0.0036  | 0.0032  | - |
| 0.0022 | 1   | .   |                             |        |        |        |         |         |   |
| 5157   | CA  | CA  | . ASP ASP ASP B B 244 244 . | 0.1154 | 0.0769 | 0.0833 | -0.0018 | 0.0074  |   |
| 0.0200 | 1   | .   |                             |        |        |        |         |         |   |
| 5158   | CB  | CB  | . ASP ASP ASP B B 244 244 . | 0.1403 | 0.0648 | 0.0766 | -0.0020 | 0.0183  | - |
| 0.0064 | 1   | .   |                             |        |        |        |         |         |   |
| 5159   | CG  | CG  | . ASP ASP ASP B B 244 244 . | 0.0572 | 0.0997 | 0.0869 | -0.0007 | 0.0125  |   |
| 0.0054 | 1   | .   |                             |        |        |        |         |         |   |
| 5160   | OD1 | OD1 | . ASP ASP ASP B B 244 244 . | 0.1012 | 0.0918 | 0.0841 | -0.0016 | 0.0146  | - |
| 0.0037 | 1   | .   |                             |        |        |        |         |         |   |
| 5161   | OD2 | OD2 | . ASP ASP ASP B B 244 244 . | 0.1001 | 0.0974 | 0.0949 | 0.0068  | 0.0013  |   |
| 0.0004 | 1   | .   |                             |        |        |        |         |         |   |
| 5162   | C   | C   | . ASP ASP ASP B B 244 244 . | 0.0981 | 0.0929 | 0.0998 | 0.0080  | -0.0186 |   |
| 0.0029 | 1   | .   |                             |        |        |        |         |         |   |
| 5163   | O   | O   | . ASP ASP ASP B B 244 244 . | 0.1156 | 0.1003 | 0.1008 | 0.0203  | -0.0215 |   |
| 0.0003 | 1   | .   |                             |        |        |        |         |         |   |
| 5164   | N   | N   | . VAL VAL VAL B B 245 245 . | 0.0993 | 0.0805 | 0.0898 | -0.0159 | -0.0213 |   |
| 0.0135 | 1   | .   |                             |        |        |        |         |         |   |
| 5165   | CA  | CA  | . VAL VAL VAL B B 245 245 . | 0.1153 | 0.0888 | 0.0990 | -0.0050 | -0.0005 |   |
| 0.0000 | 1   | .   |                             |        |        |        |         |         |   |
| 5166   | CB  | CB  | . VAL VAL VAL B B 245 245 . | 0.1388 | 0.0805 | 0.0774 | 0.0003  | -0.0010 |   |
| 0.0094 | 1   | .   |                             |        |        |        |         |         |   |
| 5167   | CG1 | CG1 | . VAL VAL VAL B B 245 245 . | 0.1442 | 0.0960 | 0.0838 | -0.0174 | 0.0014  |   |
| 0.0023 | 1   | .   |                             |        |        |        |         |         |   |
| 5168   | CG2 | CG2 | . VAL VAL VAL B B 245 245 . | 0.1470 | 0.0862 | 0.1007 | -0.0094 | 0.0187  | - |
| 0.0242 | 1   | .   |                             |        |        |        |         |         |   |
| 5169   | C   | C   | . VAL VAL VAL B B 245 245 . | 0.0802 | 0.0836 | 0.0959 | -0.0051 | -0.0013 | - |
| 0.0060 | 1   | .   |                             |        |        |        |         |         |   |
| 5170   | O   | O   | . VAL VAL VAL B B 245 245 . | 0.1008 | 0.1082 | 0.1035 | -0.0082 | -0.0118 | - |
| 0.0089 | 1   | .   |                             |        |        |        |         |         |   |
| 5171   | N   | N   | . ALA ALA ALA B B 246 246 . | 0.0789 | 0.0932 | 0.0915 | 0.0044  | 0.0116  | - |
| 0.0058 | 1   | .   |                             |        |        |        |         |         |   |
| 5172   | CA  | CA  | . ALA ALA ALA B B 246 246 . | 0.0931 | 0.0865 | 0.0567 | 0.0067  | 0.0075  | - |
| 0.0061 | 1   | .   |                             |        |        |        |         |         |   |
| 5173   | CB  | CB  | . ALA ALA ALA B B 246 246 . | 0.1087 | 0.1136 | 0.0812 | -0.0155 | 0.0119  |   |
| 0.0247 | 1   | .   |                             |        |        |        |         |         |   |
| 5174   | C   | C   | . ALA ALA ALA B B 246 246 . | 0.0719 | 0.0946 | 0.0633 | 0.0018  | -0.0105 | - |
| 0.0058 | 1   | .   |                             |        |        |        |         |         |   |
| 5175   | O   | O   | . ALA ALA ALA B B 246 246 . | 0.1171 | 0.0925 | 0.0975 | -0.0070 | -0.0065 | - |
| 0.0075 | 1   | .   |                             |        |        |        |         |         |   |
| 5176   | N   | N   | . ALA ALA ALA B B 247 247 . | 0.1181 | 0.0820 | 0.0734 | -0.0117 | -0.0143 |   |
| 0.0089 | 1   | .   |                             |        |        |        |         |         |   |
| 5177   | CA  | CA  | . ALA ALA ALA B B 247 247 . | 0.1238 | 0.0844 | 0.0663 | -0.0111 | 0.0226  |   |
| 0.0160 | 1   | .   |                             |        |        |        |         |         |   |
| 5178   | CB  | CB  | . ALA ALA ALA B B 247 247 . | 0.1206 | 0.0873 | 0.0753 | -0.0005 | 0.0116  |   |
| 0.0083 | 1   | .   |                             |        |        |        |         |         |   |
| 5179   | C   | C   | . ALA ALA ALA B B 247 247 . | 0.1187 | 0.0970 | 0.0875 | 0.0127  | 0.0043  |   |
| 0.0185 | 1   | .   |                             |        |        |        |         |         |   |
| 5180   | O   | O   | . ALA ALA ALA B B 247 247 . | 0.1114 | 0.0914 | 0.1016 | -0.0017 | 0.0013  |   |
| 0.0000 | 1   | .   |                             |        |        |        |         |         |   |
| 5181   | N   | N   | . SER SER SER B B 248 248 . | 0.1267 | 0.0858 | 0.1131 | 0.0049  | -0.0015 | - |
| 0.0042 | 1   | .   |                             |        |        |        |         |         |   |
| 5182   | CA  | CA  | . SER SER SER B B 248 248 . | 0.1067 | 0.0874 | 0.1106 | 0.0200  | 0.0049  | - |
| 0.0064 | 1   | .   |                             |        |        |        |         |         |   |

|        |     |     |                             |        |        |        |         |         |   |
|--------|-----|-----|-----------------------------|--------|--------|--------|---------|---------|---|
| 5183   | CB  | CB  | . SER SER SER B B 248 248 . | 0.0934 | 0.1135 | 0.0782 | 0.0141  | 0.0080  |   |
| 0.0021 | 1   | .   |                             |        |        |        |         |         |   |
| 5184   | OG  | OG  | . SER SER SER B B 248 248 . | 0.0999 | 0.1067 | 0.0939 | -0.0054 | -0.0070 |   |
| 0.0137 | 1   | .   |                             |        |        |        |         |         |   |
| 5185   | C   | C   | . SER SER SER B B 248 248 . | 0.1133 | 0.0974 | 0.1123 | -0.0021 | -0.0043 |   |
| 0.0134 | 1   | .   |                             |        |        |        |         |         |   |
| 5186   | O   | O   | . SER SER SER B B 248 248 . | 0.1434 | 0.1258 | 0.1288 | 0.0131  | -0.0167 | - |
| 0.0089 | 1   | .   |                             |        |        |        |         |         |   |
| 5187   | N   | N   | . GLU GLU GLU B B 249 249 . | 0.1094 | 0.1143 | 0.0849 | 0.0007  | -0.0066 |   |
| 0.0070 | 1   | .   |                             |        |        |        |         |         |   |
| 5188   | CA  | CA  | . GLU GLU GLU B B 249 249 . | 0.1236 | 0.1250 | 0.1045 | -0.0297 | -0.0140 |   |
| 0.0029 | 1   | .   |                             |        |        |        |         |         |   |
| 5189   | CB  | CB  | . GLU GLU GLU B B 249 249 . | 0.0915 | 0.1098 | 0.1134 | -0.0281 | -0.0224 |   |
| 0.0127 | 1   | .   |                             |        |        |        |         |         |   |
| 5190   | CG  | CG  | . GLU GLU GLU B B 249 249 . | 0.1316 | 0.1706 | 0.1131 | -0.0115 | 0.0186  |   |
| 0.0272 | 1   | .   |                             |        |        |        |         |         |   |
| 5191   | CD  | CD  | . GLU GLU GLU B B 249 249 . | 0.1233 | 0.1666 | 0.1225 | 0.0149  | -0.0261 | - |
| 0.0288 | 1   | .   |                             |        |        |        |         |         |   |
| 5192   | OE1 | OE1 | . GLU GLU GLU B B 249 249 . | 0.2018 | 0.3447 | 0.1410 | -0.0368 | -0.0115 | - |
| 0.0633 | 1   | .   |                             |        |        |        |         |         |   |
| 5193   | OE2 | OE2 | . GLU GLU GLU B B 249 249 . | 0.1453 | 0.1183 | 0.1483 | -0.0005 | -0.0227 | - |
| 0.0043 | 1   | .   |                             |        |        |        |         |         |   |
| 5194   | C   | C   | . GLU GLU GLU B B 249 249 . | 0.1387 | 0.1258 | 0.1279 | -0.0147 | -0.0010 | - |
| 0.0093 | 1   | .   |                             |        |        |        |         |         |   |
| 5195   | O   | O   | . GLU GLU GLU B B 249 249 . | 0.1649 | 0.1833 | 0.1353 | -0.0581 | -0.0212 | - |
| 0.0119 | 1   | .   |                             |        |        |        |         |         |   |
| 5196   | N   | N   | . PHE PHE PHE B B 250 250 . | 0.1149 | 0.1235 | 0.0942 | -0.0101 | -0.0088 |   |
| 0.0198 | 1   | .   |                             |        |        |        |         |         |   |
| 5197   | CA  | CA  | . PHE PHE PHE B B 250 250 . | 0.1203 | 0.1113 | 0.1203 | -0.0018 | -0.0057 |   |
| 0.0066 | 1   | .   |                             |        |        |        |         |         |   |
| 5198   | CB  | CB  | . PHE PHE PHE B B 250 250 . | 0.1040 | 0.1198 | 0.1318 | -0.0038 | -0.0052 | - |
| 0.0079 | 1   | .   |                             |        |        |        |         |         |   |
| 5199   | CG  | CG  | . PHE PHE PHE B B 250 250 . | 0.0724 | 0.1116 | 0.1198 | -0.0042 | -0.0117 |   |
| 0.0095 | 1   | .   |                             |        |        |        |         |         |   |
| 5200   | CD1 | CD1 | . PHE PHE PHE B B 250 250 . | 0.1101 | 0.1150 | 0.1069 | -0.0059 | -0.0210 |   |
| 0.0012 | 1   | .   |                             |        |        |        |         |         |   |
| 5201   | CE1 | CE1 | . PHE PHE PHE B B 250 250 . | 0.1005 | 0.1104 | 0.0978 | -0.0037 | 0.0227  | - |
| 0.0015 | 1   | .   |                             |        |        |        |         |         |   |
| 5202   | CZ  | CZ  | . PHE PHE PHE B B 250 250 . | 0.0959 | 0.1539 | 0.1206 | 0.0070  | 0.0120  |   |
| 0.0287 | 1   | .   |                             |        |        |        |         |         |   |
| 5203   | CE2 | CE2 | . PHE PHE PHE B B 250 250 . | 0.1341 | 0.1328 | 0.1460 | 0.0238  | -0.0202 |   |
| 0.0105 | 1   | .   |                             |        |        |        |         |         |   |
| 5204   | CD2 | CD2 | . PHE PHE PHE B B 250 250 . | 0.1119 | 0.1102 | 0.0954 | 0.0081  | -0.0187 |   |
| 0.0053 | 1   | .   |                             |        |        |        |         |         |   |
| 5205   | C   | C   | . PHE PHE PHE B B 250 250 . | 0.1044 | 0.1217 | 0.1213 | -0.0066 | 0.0078  |   |
| 0.0338 | 1   | .   |                             |        |        |        |         |         |   |
| 5206   | O   | O   | . PHE PHE PHE B B 250 250 . | 0.1281 | 0.1278 | 0.1558 | -0.0280 | -0.0102 | - |
| 0.0006 | 1   | .   |                             |        |        |        |         |         |   |
| 5207   | N   | N   | . TYR TYR TYR B B 251 251 . | 0.1265 | 0.1034 | 0.1129 | -0.0038 | -0.0141 |   |
| 0.0235 | 1   | .   |                             |        |        |        |         |         |   |
| 5208   | CA  | CA  | . TYR TYR TYR B B 251 251 . | 0.1163 | 0.1042 | 0.1292 | 0.0002  | -0.0228 |   |
| 0.0211 | 1   | .   |                             |        |        |        |         |         |   |
| 5209   | CB  | CB  | . TYR TYR TYR B B 251 251 . | 0.1026 | 0.1341 | 0.1225 | -0.0008 | -0.0188 |   |
| 0.0219 | 1   | .   |                             |        |        |        |         |         |   |
| 5210   | CG  | CG  | . TYR TYR TYR B B 251 251 . | 0.1228 | 0.1132 | 0.1220 | 0.0219  | 0.0057  | - |
| 0.0042 | 1   | .   |                             |        |        |        |         |         |   |
| 5211   | CD1 | CD1 | . TYR TYR TYR B B 251 251 . | 0.1479 | 0.1410 | 0.1377 | -0.0251 | -0.0182 |   |
| 0.0197 | 1   | .   |                             |        |        |        |         |         |   |
| 5212   | CE1 | CE1 | . TYR TYR TYR B B 251 251 . | 0.0953 | 0.1474 | 0.1679 | 0.0296  | 0.0100  |   |
| 0.0072 | 1   | .   |                             |        |        |        |         |         |   |



|        |     |     |                             |        |        |        |         |         |   |
|--------|-----|-----|-----------------------------|--------|--------|--------|---------|---------|---|
| 5243   | CA  | CA  | . LYS LYS LYS B B 255 255 . | 0.1379 | 0.1148 | 0.1519 | -0.0093 | 0.0024  |   |
| 0.0246 | 1   | .   |                             |        |        |        |         |         |   |
| 5244   | CB  | CB  | . LYS LYS LYS B B 255 255 . | 0.1401 | 0.1130 | 0.1624 | -0.0027 | -0.0005 |   |
| 0.0106 | 1   | .   |                             |        |        |        |         |         |   |
| 5245   | CG  | CG  | . LYS LYS LYS B B 255 255 . | 0.1479 | 0.1585 | 0.1546 | -0.0246 | 0.0099  |   |
| 0.0215 | 1   | .   |                             |        |        |        |         |         |   |
| 5246   | CD  | CD  | . LYS LYS LYS B B 255 255 . | 0.1757 | 0.1990 | 0.2359 | -0.0161 | 0.0159  |   |
| 0.0595 | 1   | .   |                             |        |        |        |         |         |   |
| 5247   | CE  | CE  | . LYS LYS LYS B B 255 255 . | 0.2401 | 0.1995 | 0.3339 | -0.0403 | 0.0584  |   |
| 0.0539 | 1   | .   |                             |        |        |        |         |         |   |
| 5248   | NZ  | NZ  | . LYS LYS LYS B B 255 255 . | 0.2664 | 0.3417 | 0.3739 | -0.0197 | 0.0864  | - |
| 0.0051 | 1   | .   |                             |        |        |        |         |         |   |
| 5249   | C   | C   | . LYS LYS LYS B B 255 255 . | 0.1533 | 0.1484 | 0.1381 | -0.0098 | -0.0007 |   |
| 0.0135 | 1   | .   |                             |        |        |        |         |         |   |
| 5250   | O   | O   | . LYS LYS LYS B B 255 255 . | 0.1459 | 0.1380 | 0.1372 | -0.0009 | 0.0048  | - |
| 0.0137 | 1   | .   |                             |        |        |        |         |         |   |
| 5251   | N   | N   | . TYR TYR TYR B B 256 256 . | 0.1190 | 0.1290 | 0.1309 | -0.0092 | 0.0050  |   |
| 0.0111 | 1   | .   |                             |        |        |        |         |         |   |
| 5252   | CA  | CA  | . TYR TYR TYR B B 256 256 . | 0.1396 | 0.1373 | 0.1293 | 0.0085  | -0.0258 |   |
| 0.0144 | 1   | .   |                             |        |        |        |         |         |   |
| 5253   | CB  | CB  | . TYR TYR TYR B B 256 256 . | 0.0763 | 0.1286 | 0.1210 | 0.0104  | -0.0162 |   |
| 0.0108 | 1   | .   |                             |        |        |        |         |         |   |
| 5254   | CG  | CG  | . TYR TYR TYR B B 256 256 . | 0.0991 | 0.0978 | 0.1151 | 0.0013  | -0.0318 |   |
| 0.0155 | 1   | .   |                             |        |        |        |         |         |   |
| 5255   | CD1 | CD1 | . TYR TYR TYR B B 256 256 . | 0.0915 | 0.1020 | 0.1156 | 0.0004  | -0.0038 |   |
| 0.0115 | 1   | .   |                             |        |        |        |         |         |   |
| 5256   | CE1 | CE1 | . TYR TYR TYR B B 256 256 . | 0.0802 | 0.0664 | 0.0859 | -0.0124 | -0.0354 | - |
| 0.0059 | 1   | .   |                             |        |        |        |         |         |   |
| 5257   | CZ  | CZ  | . TYR TYR TYR B B 256 256 . | 0.0780 | 0.0724 | 0.1082 | 0.0021  | -0.0052 |   |
| 0.0033 | 1   | .   |                             |        |        |        |         |         |   |
| 5258   | OH  | OH  | . TYR TYR TYR B B 256 256 . | 0.0945 | 0.0853 | 0.1129 | 0.0020  | -0.0017 | - |
| 0.0128 | 1   | .   |                             |        |        |        |         |         |   |
| 5259   | CE2 | CE2 | . TYR TYR TYR B B 256 256 . | 0.1229 | 0.0894 | 0.1317 | -0.0182 | 0.0074  |   |
| 0.0044 | 1   | .   |                             |        |        |        |         |         |   |
| 5260   | CD2 | CD2 | . TYR TYR TYR B B 256 256 . | 0.1039 | 0.0987 | 0.0861 | 0.0141  | -0.0119 |   |
| 0.0018 | 1   | .   |                             |        |        |        |         |         |   |
| 5261   | C   | C   | . TYR TYR TYR B B 256 256 . | 0.1170 | 0.1565 | 0.1254 | -0.0076 | -0.0139 |   |
| 0.0096 | 1   | .   |                             |        |        |        |         |         |   |
| 5262   | O   | O   | . TYR TYR TYR B B 256 256 . | 0.1351 | 0.1604 | 0.1176 | -0.0097 | -0.0180 | - |
| 0.0066 | 1   | .   |                             |        |        |        |         |         |   |
| 5263   | N   | N   | . ASP ASP ASP B B 257 257 . | 0.1483 | 0.2052 | 0.1595 | -0.0043 | -0.0202 |   |
| 0.0154 | 1   | .   |                             |        |        |        |         |         |   |
| 5264   | CA  | CA  | . ASP ASP ASP B B 257 257 . | 0.1360 | 0.1800 | 0.1527 | -0.0026 | -0.0128 |   |
| 0.0033 | 1   | .   |                             |        |        |        |         |         |   |
| 5265   | CB  | CB  | . ASP ASP ASP B B 257 257 . | 0.1288 | 0.1750 | 0.1800 | -0.0164 | -0.0432 | - |
| 0.0248 | 1   | .   |                             |        |        |        |         |         |   |
| 5266   | CG  | CG  | . ASP ASP ASP B B 257 257 . | 0.1192 | 0.1652 | 0.1295 | -0.0080 | -0.0006 |   |
| 0.0039 | 1   | .   |                             |        |        |        |         |         |   |
| 5267   | OD1 | OD1 | . ASP ASP ASP B B 257 257 . | 0.1373 | 0.1763 | 0.1730 | 0.0093  | -0.0260 | - |
| 0.0255 | 1   | .   |                             |        |        |        |         |         |   |
| 5268   | OD2 | OD2 | . ASP ASP ASP B B 257 257 . | 0.1589 | 0.1699 | 0.1753 | -0.0005 | -0.0173 | - |
| 0.0143 | 1   | .   |                             |        |        |        |         |         |   |
| 5269   | C   | C   | . ASP ASP ASP B B 257 257 . | 0.1047 | 0.1519 | 0.1544 | 0.0012  | -0.0176 |   |
| 0.0075 | 1   | .   |                             |        |        |        |         |         |   |
| 5270   | O   | O   | . ASP ASP ASP B B 257 257 . | 0.1253 | 0.1887 | 0.1528 | 0.0008  | -0.0192 |   |
| 0.0138 | 1   | .   |                             |        |        |        |         |         |   |
| 5271   | N   | N   | . LEU LEU LEU B B 258 258 . | 0.1738 | 0.1816 | 0.1440 | -0.0322 | -0.0275 | - |
| 0.0263 | 1   | .   |                             |        |        |        |         |         |   |
| 5272   | CA  | CA  | . LEU LEU LEU B B 258 258 . | 0.1687 | 0.1853 | 0.1657 | -0.0036 | 0.0159  | - |
| 0.0256 | 1   | .   |                             |        |        |        |         |         |   |







|        |     |     |                             |        |        |        |         |         |   |
|--------|-----|-----|-----------------------------|--------|--------|--------|---------|---------|---|
| 5333   | C   | C   | . ASP ASP ASP B B 265 265 . | 0.2856 | 0.2714 | 0.2981 | 0.0131  | -0.0326 | - |
| 0.0187 | 1   | .   |                             |        |        |        |         |         |   |
| 5334   | O   | O   | . ASP ASP ASP B B 265 265 . | 0.2401 | 0.1932 | 0.3378 | 0.0454  | -0.0455 | - |
| 0.0367 | 1   | .   |                             |        |        |        |         |         |   |
| 5335   | N   | N   | . PRO PRO PRO B B 266 266 . | 0.2790 | 0.2791 | 0.3085 | 0.0125  | -0.0165 | - |
| 0.0276 | 1   | .   |                             |        |        |        |         |         |   |
| 5336   | CA  | CA  | . PRO PRO PRO B B 266 266 . | 0.2955 | 0.2837 | 0.3021 | -0.0175 | -0.0169 | - |
| 0.0310 | 1   | .   |                             |        |        |        |         |         |   |
| 5337   | CB  | CB  | . PRO PRO PRO B B 266 266 . | 0.2803 | 0.2688 | 0.3069 | -0.0170 | -0.0361 | - |
| 0.0254 | 1   | .   |                             |        |        |        |         |         |   |
| 5338   | CG  | CG  | . PRO PRO PRO B B 266 266 . | 0.2949 | 0.2749 | 0.3159 | -0.0152 | -0.0185 | - |
| 0.0110 | 1   | .   |                             |        |        |        |         |         |   |
| 5339   | CD  | CD  | . PRO PRO PRO B B 266 266 . | 0.2751 | 0.2682 | 0.3374 | 0.0012  | -0.0268 | - |
| 0.0357 | 1   | .   |                             |        |        |        |         |         |   |
| 5340   | C   | C   | . PRO PRO PRO B B 266 266 . | 0.2958 | 0.2951 | 0.3293 | -0.0164 | -0.0104 | - |
| 0.0402 | 1   | .   |                             |        |        |        |         |         |   |
| 5341   | O   | O   | . PRO PRO PRO B B 266 266 . | 0.2815 | 0.3182 | 0.3077 | -0.0540 | -0.0381 | - |
| 0.0379 | 1   | .   |                             |        |        |        |         |         |   |
| 5342   | N   | N   | . SER SER SER B B 267 267 . | 0.2915 | 0.2982 | 0.3201 | -0.0117 | -0.0298 | - |
| 0.0469 | 1   | .   |                             |        |        |        |         |         |   |
| 5343   | CA  | CA  | . SER SER SER B B 267 267 . | 0.2805 | 0.2922 | 0.3271 | -0.0140 | -0.0220 | - |
| 0.0244 | 1   | .   |                             |        |        |        |         |         |   |
| 5344   | CB  | CB  | . SER SER SER B B 267 267 . | 0.2779 | 0.3124 | 0.3561 | -0.0345 | -0.0386 | - |
| 0.0112 | 1   | .   |                             |        |        |        |         |         |   |
| 5345   | OG  | OG  | . SER SER SER B B 267 267 . | 0.3004 | 0.3479 | 0.3295 | 0.0127  | -0.0513 | - |
| 0.0011 | 1   | .   |                             |        |        |        |         |         |   |
| 5346   | C   | C   | . SER SER SER B B 267 267 . | 0.2895 | 0.2684 | 0.2929 | -0.0130 | -0.0101 | - |
| 0.0143 | 1   | .   |                             |        |        |        |         |         |   |
| 5347   | O   | O   | . SER SER SER B B 267 267 . | 0.2983 | 0.2684 | 0.2989 | -0.0290 | 0.0111  | - |
| 0.0176 | 1   | .   |                             |        |        |        |         |         |   |
| 5348   | N   | N   | . ARG ARG ARG B B 268 268 . | 0.2463 | 0.2013 | 0.2684 | -0.0144 | -0.0138 | - |
| 0.0111 | 1   | .   |                             |        |        |        |         |         |   |
| 5349   | CA  | CA  | . ARG ARG ARG B B 268 268 . | 0.2392 | 0.2381 | 0.2241 | 0.0040  | -0.0137 | - |
| 0.0252 | 1   | .   |                             |        |        |        |         |         |   |
| 5350   | CB  | CB  | . ARG ARG ARG B B 268 268 . | 0.2484 | 0.2394 | 0.2480 | 0.0004  | -0.0052 | - |
| 0.0149 | 1   | .   |                             |        |        |        |         |         |   |
| 5351   | CG  | CG  | . ARG ARG ARG B B 268 268 . | 0.2613 | 0.1693 | 0.1815 | 0.0433  | -0.0305 | - |
| 0.0580 | 1   | .   |                             |        |        |        |         |         |   |
| 5352   | CD  | CD  | . ARG ARG ARG B B 268 268 . | 0.2583 | 0.2381 | 0.2131 | 0.0177  | -0.0111 | - |
| 0.0732 | 1   | .   |                             |        |        |        |         |         |   |
| 5353   | NE  | NE  | . ARG ARG ARG B B 268 268 . | 0.2486 | 0.2591 | 0.2509 | 0.0109  | 0.0241  | - |
| 0.0521 | 1   | .   |                             |        |        |        |         |         |   |
| 5354   | CZ  | CZ  | . ARG ARG ARG B B 268 268 . | 0.1429 | 0.1485 | 0.2348 | -0.0398 | -0.0728 | - |
| 0.0316 | 1   | .   |                             |        |        |        |         |         |   |
| 5355   | NH1 | NH1 | . ARG ARG ARG B B 268 268 . | 0.2235 | 0.2752 | 0.3661 | -0.0220 | -0.0970 | - |
| 0.0834 | 1   | .   |                             |        |        |        |         |         |   |
| 5356   | NH2 | NH2 | . ARG ARG ARG B B 268 268 . | 0.2533 | 0.1405 | 0.2172 | 0.0419  | -0.0791 | - |
| 0.0326 | 1   | .   |                             |        |        |        |         |         |   |
| 5357   | C   | C   | . ARG ARG ARG B B 268 268 . | 0.1796 | 0.2195 | 0.2092 | -0.0182 | -0.0152 | - |
| 0.0123 | 1   | .   |                             |        |        |        |         |         |   |
| 5358   | O   | O   | . ARG ARG ARG B B 268 268 . | 0.1784 | 0.2696 | 0.2514 | -0.0142 | -0.0183 | - |
| 0.0169 | 1   | .   |                             |        |        |        |         |         |   |
| 5359   | N   | N   | . TYR TYR TYR B B 269 269 . | 0.1983 | 0.2408 | 0.1883 | -0.0443 | 0.0010  | - |
| 0.0217 | 1   | .   |                             |        |        |        |         |         |   |
| 5360   | CA  | CA  | . TYR TYR TYR B B 269 269 . | 0.1663 | 0.1975 | 0.1586 | -0.0445 | -0.0058 | - |
| 0.0218 | 1   | .   |                             |        |        |        |         |         |   |
| 5361   | CB  | CB  | . TYR TYR TYR B B 269 269 . | 0.1766 | 0.1679 | 0.1788 | -0.0520 | -0.0200 | - |
| 0.0237 | 1   | .   |                             |        |        |        |         |         |   |
| 5362   | CG  | CG  | . TYR TYR TYR B B 269 269 . | 0.1588 | 0.1217 | 0.1766 | -0.0330 | -0.0201 | - |
| 0.0069 | 1   | .   |                             |        |        |        |         |         |   |



|        |     |     |                             |        |        |        |         |         |   |
|--------|-----|-----|-----------------------------|--------|--------|--------|---------|---------|---|
| 5393   | CG  | CG  | . ASP ASP ASP B B 273 273 . | 0.2635 | 0.2298 | 0.2695 | -0.0010 | 0.0151  |   |
| 0.0092 | 1   | .   |                             |        |        |        |         |         |   |
| 5394   | OD1 | OD1 | . ASP ASP ASP B B 273 273 . | 0.3055 | 0.2752 | 0.3820 | -0.0816 | 0.0548  |   |
| 0.0120 | 1   | .   |                             |        |        |        |         |         |   |
| 5395   | OD2 | OD2 | . ASP ASP ASP B B 273 273 . | 0.3440 | 0.3066 | 0.2708 | -0.0163 | 0.0384  | - |
| 0.0478 | 1   | .   |                             |        |        |        |         |         |   |
| 5396   | C   | C   | . ASP ASP ASP B B 273 273 . | 0.1853 | 0.1570 | 0.1572 | 0.0114  | 0.0008  |   |
| 0.0099 | 1   | .   |                             |        |        |        |         |         |   |
| 5397   | O   | O   | . ASP ASP ASP B B 273 273 . | 0.1911 | 0.1488 | 0.1323 | 0.0192  | 0.0009  |   |
| 0.0050 | 1   | .   |                             |        |        |        |         |         |   |
| 5398   | N   | N   | . GLN GLN GLN B B 274 274 . | 0.1544 | 0.1225 | 0.1529 | 0.0072  | 0.0042  | - |
| 0.0012 | 1   | .   |                             |        |        |        |         |         |   |
| 5399   | CA  | CA  | . GLN GLN GLN B B 274 274 . | 0.1435 | 0.1460 | 0.1605 | -0.0008 | 0.0007  |   |
| 0.0137 | 1   | .   |                             |        |        |        |         |         |   |
| 5400   | CB  | CB  | . GLN GLN GLN B B 274 274 . | 0.1634 | 0.1447 | 0.1722 | -0.0172 | -0.0129 |   |
| 0.0187 | 1   | .   |                             |        |        |        |         |         |   |
| 5401   | CG  | CG  | . GLN GLN GLN B B 274 274 . | 0.2050 | 0.1808 | 0.2137 | -0.0066 | 0.0079  |   |
| 0.0194 | 1   | .   |                             |        |        |        |         |         |   |
| 5402   | CD  | CD  | . GLN GLN GLN B B 274 274 . | 0.2468 | 0.2047 | 0.2641 | -0.0297 | 0.0279  | - |
| 0.0157 | 1   | .   |                             |        |        |        |         |         |   |
| 5403   | OE1 | OE1 | . GLN GLN GLN B B 274 274 . | 0.2037 | 0.1966 | 0.1908 | -0.0122 | 0.0453  |   |
| 0.0103 | 1   | .   |                             |        |        |        |         |         |   |
| 5404   | NE2 | NE2 | . GLN GLN GLN B B 274 274 . | 0.2561 | 0.3045 | 0.3566 | -0.0483 | 0.0221  | - |
| 0.0668 | 1   | .   |                             |        |        |        |         |         |   |
| 5405   | C   | C   | . GLN GLN GLN B B 274 274 . | 0.1521 | 0.1285 | 0.1568 | 0.0084  | 0.0250  |   |
| 0.0025 | 1   | .   |                             |        |        |        |         |         |   |
| 5406   | O   | O   | . GLN GLN GLN B B 274 274 . | 0.1566 | 0.1197 | 0.1422 | 0.0098  | 0.0045  |   |
| 0.0065 | 1   | .   |                             |        |        |        |         |         |   |
| 5407   | N   | N   | . LEU LEU LEU B B 275 275 . | 0.1160 | 0.1001 | 0.1373 | 0.0030  | 0.0064  | - |
| 0.0014 | 1   | .   |                             |        |        |        |         |         |   |
| 5408   | CA  | CA  | . LEU LEU LEU B B 275 275 . | 0.1134 | 0.1330 | 0.1205 | 0.0090  | 0.0182  | - |
| 0.0138 | 1   | .   |                             |        |        |        |         |         |   |
| 5409   | CB  | CB  | . LEU LEU LEU B B 275 275 . | 0.1384 | 0.1619 | 0.1614 | 0.0326  | 0.0309  |   |
| 0.0063 | 1   | .   |                             |        |        |        |         |         |   |
| 5410   | CG  | CG  | . LEU LEU LEU B B 275 275 . | 0.1474 | 0.1891 | 0.1423 | 0.0463  | 0.0160  |   |
| 0.0220 | 1   | .   |                             |        |        |        |         |         |   |
| 5411   | CD1 | CD1 | . LEU LEU LEU B B 275 275 . | 0.1342 | 0.2172 | 0.1593 | 0.0665  | 0.0180  |   |
| 0.0843 | 1   | .   |                             |        |        |        |         |         |   |
| 5412   | CD2 | CD2 | . LEU LEU LEU B B 275 275 . | 0.1451 | 0.1947 | 0.1299 | 0.0693  | 0.0139  |   |
| 0.0023 | 1   | .   |                             |        |        |        |         |         |   |
| 5413   | C   | C   | . LEU LEU LEU B B 275 275 . | 0.1469 | 0.1406 | 0.1491 | 0.0090  | 0.0090  | - |
| 0.0053 | 1   | .   |                             |        |        |        |         |         |   |
| 5414   | O   | O   | . LEU LEU LEU B B 275 275 . | 0.1361 | 0.1422 | 0.1420 | 0.0138  | 0.0187  |   |
| 0.0051 | 1   | .   |                             |        |        |        |         |         |   |
| 5415   | N   | N   | . GLY GLY GLY B B 276 276 . | 0.1313 | 0.1064 | 0.1124 | -0.0209 | 0.0056  |   |
| 0.0112 | 1   | .   |                             |        |        |        |         |         |   |
| 5416   | CA  | CA  | . GLY GLY GLY B B 276 276 . | 0.1331 | 0.1040 | 0.1014 | 0.0110  | 0.0011  | - |
| 0.0046 | 1   | .   |                             |        |        |        |         |         |   |
| 5417   | C   | C   | . GLY GLY GLY B B 276 276 . | 0.1478 | 0.1252 | 0.1096 | 0.0058  | 0.0182  |   |
| 0.0079 | 1   | .   |                             |        |        |        |         |         |   |
| 5418   | O   | O   | . GLY GLY GLY B B 276 276 . | 0.1606 | 0.1143 | 0.1092 | 0.0013  | 0.0166  | - |
| 0.0043 | 1   | .   |                             |        |        |        |         |         |   |
| 5419   | N   | N   | . ALA ALA ALA B B 277 277 . | 0.1356 | 0.0947 | 0.1221 | 0.0186  | 0.0330  |   |
| 0.0193 | 1   | .   |                             |        |        |        |         |         |   |
| 5420   | CA  | CA  | . ALA ALA ALA B B 277 277 . | 0.1152 | 0.1163 | 0.1039 | 0.0101  | 0.0206  |   |
| 0.0124 | 1   | .   |                             |        |        |        |         |         |   |
| 5421   | CB  | CB  | . ALA ALA ALA B B 277 277 . | 0.1364 | 0.1183 | 0.1534 | 0.0072  | 0.0656  |   |
| 0.0287 | 1   | .   |                             |        |        |        |         |         |   |
| 5422   | C   | C   | . ALA ALA ALA B B 277 277 . | 0.1344 | 0.1118 | 0.1326 | 0.0161  | 0.0188  |   |
| 0.0051 | 1   | .   |                             |        |        |        |         |         |   |

|        |     |     |                             |        |        |        |        |         |   |
|--------|-----|-----|-----------------------------|--------|--------|--------|--------|---------|---|
| 5423   | O   | O   | . ALA ALA ALA B B 277 277 . | 0.1830 | 0.1182 | 0.1595 | 0.0099 | 0.0393  | - |
| 0.0002 | 1   | .   |                             |        |        |        |        |         |   |
| 5424   | N   | N   | . LEU LEU LEU B B 278 278 . | 0.1118 | 0.1079 | 0.1180 | 0.0132 | 0.0059  |   |
| 0.0141 | 1   | .   |                             |        |        |        |        |         |   |
| 5425   | CA  | CA  | . LEU LEU LEU B B 278 278 . | 0.0978 | 0.1119 | 0.1216 | 0.0207 | -0.0113 |   |
| 0.0047 | 1   | .   |                             |        |        |        |        |         |   |
| 5426   | CB  | CB  | . LEU LEU LEU B B 278 278 . | 0.1196 | 0.1324 | 0.1277 | 0.0136 | 0.0075  | - |
| 0.0051 | 1   | .   |                             |        |        |        |        |         |   |
| 5427   | CG  | CG  | . LEU LEU LEU B B 278 278 . | 0.1601 | 0.1598 | 0.1503 | 0.0057 | 0.0089  | - |
| 0.0269 | 1   | .   |                             |        |        |        |        |         |   |
| 5428   | CD1 | CD1 | . LEU LEU LEU B B 278 278 . | 0.1353 | 0.2325 | 0.2443 | 0.0135 | -0.0523 | - |
| 0.0408 | 1   | .   |                             |        |        |        |        |         |   |
| 5429   | CD2 | CD2 | . LEU LEU LEU B B 278 278 . | 0.2035 | 0.1951 | 0.1320 | 0.0138 | -0.0056 | - |
| 0.0742 | 1   | .   |                             |        |        |        |        |         |   |
| 5430   | C   | C   | . LEU LEU LEU B B 278 278 . | 0.0969 | 0.1041 | 0.1255 | 0.0204 | -0.0075 |   |
| 0.0039 | 1   | .   |                             |        |        |        |        |         |   |
| 5431   | O   | O   | . LEU LEU LEU B B 278 278 . | 0.1519 | 0.1057 | 0.1049 | 0.0299 | 0.0088  | - |
| 0.0075 | 1   | .   |                             |        |        |        |        |         |   |
| 5432   | N   | N   | . TYR TYR TYR B B 279 279 . | 0.0937 | 0.1164 | 0.1049 | 0.0077 | 0.0194  |   |
| 0.0186 | 1   | .   |                             |        |        |        |        |         |   |
| 5433   | CA  | CA  | . TYR TYR TYR B B 279 279 . | 0.0905 | 0.0986 | 0.1098 | 0.0077 | -0.0007 | - |
| 0.0091 | 1   | .   |                             |        |        |        |        |         |   |
| 5434   | CB  | CB  | . TYR TYR TYR B B 279 279 . | 0.1032 | 0.0998 | 0.1073 | 0.0082 | -0.0066 | - |
| 0.0102 | 1   | .   |                             |        |        |        |        |         |   |
| 5435   | CG  | CG  | . TYR TYR TYR B B 279 279 . | 0.0944 | 0.0812 | 0.0808 | 0.0269 | 0.0043  | - |
| 0.0038 | 1   | .   |                             |        |        |        |        |         |   |
| 5436   | CD1 | CD1 | . TYR TYR TYR B B 279 279 . | 0.1264 | 0.0918 | 0.0966 | 0.0197 | -0.0004 | - |
| 0.0206 | 1   | .   |                             |        |        |        |        |         |   |
| 5437   | CE1 | CE1 | . TYR TYR TYR B B 279 279 . | 0.1063 | 0.1044 | 0.0818 | 0.0103 | -0.0048 | - |
| 0.0162 | 1   | .   |                             |        |        |        |        |         |   |
| 5438   | CZ  | CZ  | . TYR TYR TYR B B 279 279 . | 0.1260 | 0.1126 | 0.0956 | 0.0155 | -0.0091 | - |
| 0.0081 | 1   | .   |                             |        |        |        |        |         |   |
| 5439   | OH  | OH  | . TYR TYR TYR B B 279 279 . | 0.1352 | 0.1057 | 0.0976 | 0.0182 | 0.0000  |   |
| 0.0044 | 1   | .   |                             |        |        |        |        |         |   |
| 5440   | CE2 | CE2 | . TYR TYR TYR B B 279 279 . | 0.1045 | 0.0984 | 0.0748 | 0.0106 | 0.0075  | - |
| 0.0237 | 1   | .   |                             |        |        |        |        |         |   |
| 5441   | CD2 | CD2 | . TYR TYR TYR B B 279 279 . | 0.1141 | 0.0755 | 0.0958 | 0.0040 | 0.0161  | - |
| 0.0097 | 1   | .   |                             |        |        |        |        |         |   |
| 5442   | C   | C   | . TYR TYR TYR B B 279 279 . | 0.1152 | 0.1062 | 0.1027 | 0.0225 | 0.0133  |   |
| 0.0001 | 1   | .   |                             |        |        |        |        |         |   |
| 5443   | O   | O   | . TYR TYR TYR B B 279 279 . | 0.1161 | 0.1097 | 0.1144 | 0.0063 | -0.0007 | - |
| 0.0045 | 1   | .   |                             |        |        |        |        |         |   |
| 5444   | N   | N   | . GLN GLN GLN B B 280 280 . | 0.1405 | 0.1149 | 0.0994 | 0.0037 | 0.0179  | - |
| 0.0023 | 1   | .   |                             |        |        |        |        |         |   |
| 5445   | CA  | CA  | . GLN GLN GLN B B 280 280 . | 0.1395 | 0.1163 | 0.1157 | 0.0184 | 0.0112  | - |
| 0.0063 | 1   | .   |                             |        |        |        |        |         |   |
| 5446   | CB  | CB  | . GLN GLN GLN B B 280 280 . | 0.1399 | 0.1622 | 0.0981 | 0.0449 | 0.0260  | - |
| 0.0001 | 1   | .   |                             |        |        |        |        |         |   |
| 5447   | CG  | CG  | . GLN GLN GLN B B 280 280 . | 0.2232 | 0.1715 | 0.1818 | 0.0752 | -0.0160 | - |
| 0.0421 | 1   | .   |                             |        |        |        |        |         |   |
| 5448   | CD  | CD  | . GLN GLN GLN B B 280 280 . | 0.4596 | 0.3861 | 0.3698 | 0.0108 | -0.0762 | - |
| 0.0140 | 1   | .   |                             |        |        |        |        |         |   |
| 5449   | OE1 | OE1 | . GLN GLN GLN B B 280 280 . | 0.5776 | 0.4008 | 0.4865 | 0.0062 | -0.0187 |   |
| 0.0346 | 1   | .   |                             |        |        |        |        |         |   |
| 5450   | NE2 | NE2 | . GLN GLN GLN B B 280 280 . | 0.5598 | 0.3728 | 0.4064 | 0.0422 | -0.0580 |   |
| 0.0748 | 1   | .   |                             |        |        |        |        |         |   |
| 5451   | C   | C   | . GLN GLN GLN B B 280 280 . | 0.1318 | 0.1244 | 0.1112 | 0.0168 | 0.0222  | - |
| 0.0089 | 1   | .   |                             |        |        |        |        |         |   |
| 5452   | O   | O   | . GLN GLN GLN B B 280 280 . | 0.1720 | 0.1123 | 0.1104 | 0.0095 | 0.0085  | - |
| 0.0121 | 1   | .   |                             |        |        |        |        |         |   |

|        |     |     |                             |        |        |        |         |         |   |
|--------|-----|-----|-----------------------------|--------|--------|--------|---------|---------|---|
| 5453   | N   | N   | . ASP ASP ASP B B 281 281 . | 0.1331 | 0.1483 | 0.0959 | 0.0134  | 0.0105  |   |
| 0.0099 | 1   | .   |                             |        |        |        |         |         |   |
| 5454   | CA  | CA  | . ASP ASP ASP B B 281 281 . | 0.1361 | 0.1285 | 0.1413 | 0.0041  | 0.0123  |   |
| 0.0128 | 1   | .   |                             |        |        |        |         |         |   |
| 5455   | CB  | CB  | . ASP ASP ASP B B 281 281 . | 0.1374 | 0.1518 | 0.1391 | 0.0063  | 0.0181  |   |
| 0.0272 | 1   | .   |                             |        |        |        |         |         |   |
| 5456   | CG  | CG  | . ASP ASP ASP B B 281 281 . | 0.2107 | 0.2043 | 0.2373 | 0.0130  | -0.0194 |   |
| 0.0224 | 1   | .   |                             |        |        |        |         |         |   |
| 5457   | OD1 | OD1 | . ASP ASP ASP B B 281 281 . | 0.2504 | 0.2771 | 0.2474 | 0.0063  | 0.0737  |   |
| 0.0161 | 1   | .   |                             |        |        |        |         |         |   |
| 5458   | OD2 | OD2 | . ASP ASP ASP B B 281 281 . | 0.2870 | 0.2858 | 0.4477 | -0.0760 | 0.0043  | - |
| 0.0148 | 1   | .   |                             |        |        |        |         |         |   |
| 5459   | C   | C   | . ASP ASP ASP B B 281 281 . | 0.1421 | 0.1314 | 0.1308 | 0.0016  | 0.0200  |   |
| 0.0080 | 1   | .   |                             |        |        |        |         |         |   |
| 5460   | O   | O   | . ASP ASP ASP B B 281 281 . | 0.1424 | 0.1268 | 0.1352 | 0.0142  | 0.0131  | - |
| 0.0176 | 1   | .   |                             |        |        |        |         |         |   |
| 5461   | N   | N   | . PHE PHE PHE B B 282 282 . | 0.1002 | 0.1212 | 0.1063 | -0.0117 | 0.0079  |   |
| 0.0088 | 1   | .   |                             |        |        |        |         |         |   |
| 5462   | CA  | CA  | . PHE PHE PHE B B 282 282 . | 0.1269 | 0.1148 | 0.1211 | -0.0024 | 0.0043  |   |
| 0.0054 | 1   | .   |                             |        |        |        |         |         |   |
| 5463   | CB  | CB  | . PHE PHE PHE B B 282 282 . | 0.1208 | 0.1065 | 0.1343 | -0.0158 | 0.0130  |   |
| 0.0075 | 1   | .   |                             |        |        |        |         |         |   |
| 5464   | CG  | CG  | . PHE PHE PHE B B 282 282 . | 0.1524 | 0.1171 | 0.1183 | -0.0093 | -0.0020 |   |
| 0.0529 | 1   | .   |                             |        |        |        |         |         |   |
| 5465   | CD1 | CD1 | . PHE PHE PHE B B 282 282 . | 0.2539 | 0.1104 | 0.1207 | -0.0215 | 0.0063  |   |
| 0.0217 | 1   | .   |                             |        |        |        |         |         |   |
| 5466   | CE1 | CE1 | . PHE PHE PHE B B 282 282 . | 0.2198 | 0.1261 | 0.1476 | -0.0111 | -0.0176 |   |
| 0.0222 | 1   | .   |                             |        |        |        |         |         |   |
| 5467   | CZ  | CZ  | . PHE PHE PHE B B 282 282 . | 0.2132 | 0.1364 | 0.1317 | -0.0302 | -0.0137 |   |
| 0.0262 | 1   | .   |                             |        |        |        |         |         |   |
| 5468   | CE2 | CE2 | . PHE PHE PHE B B 282 282 . | 0.2413 | 0.1601 | 0.1820 | 0.0224  | -0.0285 | - |
| 0.0020 | 1   | .   |                             |        |        |        |         |         |   |
| 5469   | CD2 | CD2 | . PHE PHE PHE B B 282 282 . | 0.1295 | 0.1006 | 0.1314 | 0.0165  | -0.0088 |   |
| 0.0027 | 1   | .   |                             |        |        |        |         |         |   |
| 5470   | C   | C   | . PHE PHE PHE B B 282 282 . | 0.1140 | 0.0969 | 0.1076 | 0.0136  | 0.0053  | - |
| 0.0066 | 1   | .   |                             |        |        |        |         |         |   |
| 5471   | O   | O   | . PHE PHE PHE B B 282 282 . | 0.1304 | 0.1202 | 0.0991 | 0.0069  | -0.0143 |   |
| 0.0034 | 1   | .   |                             |        |        |        |         |         |   |
| 5472   | N   | N   | . VAL VAL VAL B B 283 283 . | 0.1176 | 0.1160 | 0.0863 | -0.0021 | -0.0029 | - |
| 0.0089 | 1   | .   |                             |        |        |        |         |         |   |
| 5473   | CA  | CA  | . VAL VAL VAL B B 283 283 . | 0.0936 | 0.1011 | 0.0914 | 0.0119  | -0.0080 | - |
| 0.0021 | 1   | .   |                             |        |        |        |         |         |   |
| 5474   | CB  | CB  | . VAL VAL VAL B B 283 283 . | 0.0819 | 0.1048 | 0.0824 | 0.0070  | -0.0099 |   |
| 0.0067 | 1   | .   |                             |        |        |        |         |         |   |
| 5475   | CG1 | CG1 | . VAL VAL VAL B B 283 283 . | 0.1610 | 0.1312 | 0.1148 | 0.0177  | -0.0114 | - |
| 0.0161 | 1   | .   |                             |        |        |        |         |         |   |
| 5476   | CG2 | CG2 | . VAL VAL VAL B B 283 283 . | 0.1313 | 0.1195 | 0.1463 | 0.0283  | 0.0257  |   |
| 0.0232 | 1   | .   |                             |        |        |        |         |         |   |
| 5477   | C   | C   | . VAL VAL VAL B B 283 283 . | 0.1010 | 0.0864 | 0.0978 | 0.0035  | 0.0025  |   |
| 0.0126 | 1   | .   |                             |        |        |        |         |         |   |
| 5478   | O   | O   | . VAL VAL VAL B B 283 283 . | 0.1636 | 0.0893 | 0.1089 | 0.0018  | 0.0070  | - |
| 0.0047 | 1   | .   |                             |        |        |        |         |         |   |
| 5479   | N   | N   | . ARG ARG ARG B B 284 284 . | 0.1216 | 0.1147 | 0.0865 | 0.0082  | 0.0170  | - |
| 0.0065 | 1   | .   |                             |        |        |        |         |         |   |
| 5480   | CA  | CA  | . ARG ARG ARG B B 284 284 . | 0.1201 | 0.1080 | 0.1271 | 0.0150  | 0.0091  | - |
| 0.0077 | 1   | .   |                             |        |        |        |         |         |   |
| 5481   | CB  | CB  | . ARG ARG ARG B B 284 284 . | 0.1544 | 0.1257 | 0.1206 | 0.0036  | 0.0419  | - |
| 0.0027 | 1   | .   |                             |        |        |        |         |         |   |
| 5482   | CG  | CG  | . ARG ARG ARG B B 284 284 . | 0.1502 | 0.1321 | 0.1451 | 0.0042  | -0.0025 | - |
| 0.0204 | 1   | .   |                             |        |        |        |         |         |   |



|        |     |     |                             |        |        |        |         |         |   |
|--------|-----|-----|-----------------------------|--------|--------|--------|---------|---------|---|
| 5513   | CG  | CG  | . PRO PRO PRO B B 287 287 . | 0.1622 | 0.1248 | 0.1937 | 0.0214  | 0.0103  |   |
| 0.0374 | 1   | .   |                             |        |        |        |         |         |   |
| 5514   | CD  | CD  | . PRO PRO PRO B B 287 287 . | 0.1245 | 0.1111 | 0.1294 | 0.0319  | 0.0118  |   |
| 0.0216 | 1   | .   |                             |        |        |        |         |         |   |
| 5515   | C   | C   | . PRO PRO PRO B B 287 287 . | 0.1535 | 0.1135 | 0.1210 | 0.0020  | 0.0269  | - |
| 0.0095 | 1   | .   |                             |        |        |        |         |         |   |
| 5516   | O   | O   | . PRO PRO PRO B B 287 287 . | 0.1341 | 0.1063 | 0.1253 | 0.0042  | 0.0215  |   |
| 0.0045 | 1   | .   |                             |        |        |        |         |         |   |
| 5517   | N   | N   | . VAL VAL VAL B B 288 288 . | 0.1430 | 0.1075 | 0.1209 | 0.0079  | 0.0062  |   |
| 0.0151 | 1   | .   |                             |        |        |        |         |         |   |
| 5518   | CA  | CA  | . VAL VAL VAL B B 288 288 . | 0.1298 | 0.1125 | 0.1237 | -0.0106 | 0.0154  |   |
| 0.0049 | 1   | .   |                             |        |        |        |         |         |   |
| 5519   | CB  | CB  | . VAL VAL VAL B B 288 288 . | 0.1340 | 0.1049 | 0.1178 | 0.0182  | 0.0196  |   |
| 0.0054 | 1   | .   |                             |        |        |        |         |         |   |
| 5520   | CG1 | CG1 | . VAL VAL VAL B B 288 288 . | 0.1503 | 0.0891 | 0.1203 | 0.0435  | 0.0298  | - |
| 0.0107 | 1   | .   |                             |        |        |        |         |         |   |
| 5521   | CG2 | CG2 | . VAL VAL VAL B B 288 288 . | 0.1167 | 0.1416 | 0.1353 | -0.0033 | 0.0339  |   |
| 0.0040 | 1   | .   |                             |        |        |        |         |         |   |
| 5522   | C   | C   | . VAL VAL VAL B B 288 288 . | 0.1192 | 0.1000 | 0.0820 | 0.0257  | 0.0134  |   |
| 0.0077 | 1   | .   |                             |        |        |        |         |         |   |
| 5523   | O   | O   | . VAL VAL VAL B B 288 288 . | 0.1679 | 0.1486 | 0.1067 | 0.0090  | 0.0085  |   |
| 0.0388 | 1   | .   |                             |        |        |        |         |         |   |
| 5524   | N   | N   | . VAL VAL VAL B B 289 289 . | 0.1131 | 0.0806 | 0.0923 | 0.0096  | -0.0011 | - |
| 0.0043 | 1   | .   |                             |        |        |        |         |         |   |
| 5525   | CA  | CA  | . VAL VAL VAL B B 289 289 . | 0.1025 | 0.0896 | 0.1108 | 0.0108  | 0.0017  |   |
| 0.0005 | 1   | .   |                             |        |        |        |         |         |   |
| 5526   | CB  | CB  | . VAL VAL VAL B B 289 289 . | 0.1535 | 0.0958 | 0.1129 | 0.0148  | -0.0042 | - |
| 0.0026 | 1   | .   |                             |        |        |        |         |         |   |
| 5527   | CG1 | CG1 | . VAL VAL VAL B B 289 289 . | 0.1475 | 0.1248 | 0.1539 | 0.0389  | 0.0087  | - |
| 0.0142 | 1   | .   |                             |        |        |        |         |         |   |
| 5528   | CG2 | CG2 | . VAL VAL VAL B B 289 289 . | 0.1633 | 0.1285 | 0.1552 | 0.0040  | 0.0331  |   |
| 0.0122 | 1   | .   |                             |        |        |        |         |         |   |
| 5529   | C   | C   | . VAL VAL VAL B B 289 289 . | 0.0906 | 0.1059 | 0.0738 | 0.0069  | 0.0072  | - |
| 0.0088 | 1   | .   |                             |        |        |        |         |         |   |
| 5530   | O   | O   | . VAL VAL VAL B B 289 289 . | 0.1405 | 0.0940 | 0.1098 | 0.0052  | -0.0021 |   |
| 0.0128 | 1   | .   |                             |        |        |        |         |         |   |
| 5531   | N   | N   | . SER SER SER B B 290 290 . | 0.1164 | 0.0815 | 0.0869 | 0.0118  | 0.0145  | - |
| 0.0120 | 1   | .   |                             |        |        |        |         |         |   |
| 5532   | CA  | CA  | . SER SER SER B B 290 290 . | 0.1109 | 0.0836 | 0.0922 | 0.0125  | -0.0004 |   |
| 0.0049 | 1   | .   |                             |        |        |        |         |         |   |
| 5533   | CB  | CB  | . SER SER SER B B 290 290 . | 0.1538 | 0.0878 | 0.1131 | -0.0024 | 0.0188  | - |
| 0.0060 | 1   | .   |                             |        |        |        |         |         |   |
| 5534   | OG  | OG  | . SER SER SER B B 290 290 . | 0.1353 | 0.0882 | 0.1109 | 0.0128  | 0.0134  |   |
| 0.0194 | 1   | .   |                             |        |        |        |         |         |   |
| 5535   | C   | C   | . SER SER SER B B 290 290 . | 0.0953 | 0.0842 | 0.0819 | 0.0131  | -0.0044 | - |
| 0.0041 | 1   | .   |                             |        |        |        |         |         |   |
| 5536   | O   | O   | . SER SER SER B B 290 290 . | 0.1136 | 0.0854 | 0.0720 | 0.0026  | -0.0193 | - |
| 0.0083 | 1   | .   |                             |        |        |        |         |         |   |
| 5537   | N   | N   | . ILE ILE ILE B B 291 291 . | 0.0956 | 0.0843 | 0.0728 | 0.0114  | 0.0024  | - |
| 0.0053 | 1   | .   |                             |        |        |        |         |         |   |
| 5538   | CA  | CA  | . ILE ILE ILE B B 291 291 . | 0.0931 | 0.0867 | 0.0904 | -0.0072 | 0.0123  | - |
| 0.0018 | 1   | .   |                             |        |        |        |         |         |   |
| 5539   | CB  | CB  | . ILE ILE ILE B B 291 291 . | 0.0696 | 0.0615 | 0.0810 | -0.0001 | 0.0225  | - |
| 0.0129 | 1   | .   |                             |        |        |        |         |         |   |
| 5540   | CG1 | CG1 | . ILE ILE ILE B B 291 291 . | 0.0773 | 0.1184 | 0.0948 | 0.0380  | 0.0348  |   |
| 0.0029 | 1   | .   |                             |        |        |        |         |         |   |
| 5541   | CD  | CD  | . ILE ILE ILE B B 291 291 . | 0.1356 | 0.1366 | 0.0953 | 0.0139  | 0.0517  | - |
| 0.0117 | 1   | .   |                             |        |        |        |         |         |   |
| 5542   | CG2 | CG2 | . ILE ILE ILE B B 291 291 . | 0.1156 | 0.0739 | 0.1077 | -0.0072 | -0.0021 | - |
| 0.0351 | 1   | .   |                             |        |        |        |         |         |   |



|        |     |     |                             |        |        |        |         |         |   |
|--------|-----|-----|-----------------------------|--------|--------|--------|---------|---------|---|
| 5543   | C   | C   | . ILE ILE ILE B B 291 291 . | 0.0893 | 0.0811 | 0.0680 | 0.0012  | -0.0162 |   |
| 0.0066 | 1   | .   |                             |        |        |        |         |         |   |
| 5544   | O   | O   | . ILE ILE ILE B B 291 291 . | 0.0940 | 0.0834 | 0.0725 | -0.0007 | -0.0058 | - |
| 0.0056 | 1   | .   |                             |        |        |        |         |         |   |
| 5545   | N   | N   | . GLU GLU GLU B B 292 292 . | 0.1178 | 0.0760 | 0.0760 | 0.0050  | 0.0288  | - |
| 0.0166 | 1   | .   |                             |        |        |        |         |         |   |
| 5546   | CA  | CA  | . GLU GLU GLU B B 292 292 . | 0.0722 | 0.0811 | 0.0610 | -0.0089 | 0.0165  | - |
| 0.0076 | 1   | .   |                             |        |        |        |         |         |   |
| 5547   | CB  | CB  | . GLU GLU GLU B B 292 292 . | 0.0840 | 0.0921 | 0.0544 | 0.0128  | 0.0090  |   |
| 0.0104 | 1   | .   |                             |        |        |        |         |         |   |
| 5548   | CG  | CG  | . GLU GLU GLU B B 292 292 . | 0.0981 | 0.0862 | 0.0610 | 0.0046  | -0.0009 |   |
| 0.0246 | 1   | .   |                             |        |        |        |         |         |   |
| 5549   | CD  | CD  | . GLU GLU GLU B B 292 292 . | 0.0905 | 0.0957 | 0.0874 | 0.0164  | -0.0167 |   |
| 0.0087 | 1   | .   |                             |        |        |        |         |         |   |
| 5550   | OE1 | OE1 | . GLU GLU GLU B B 292 292 . | 0.1295 | 0.0877 | 0.0928 | 0.0092  | 0.0107  | - |
| 0.0055 | 1   | .   |                             |        |        |        |         |         |   |
| 5551   | OE2 | OE2 | . GLU GLU GLU B B 292 292 . | 0.1459 | 0.1023 | 0.1169 | 0.0105  | 0.0112  |   |
| 0.0145 | 1   | .   |                             |        |        |        |         |         |   |
| 5552   | C   | C   | . GLU GLU GLU B B 292 292 . | 0.0818 | 0.0657 | 0.0801 | 0.0068  | -0.0085 |   |
| 0.0167 | 1   | .   |                             |        |        |        |         |         |   |
| 5553   | O   | O   | . GLU GLU GLU B B 292 292 . | 0.0990 | 0.0760 | 0.0771 | 0.0089  | -0.0185 |   |
| 0.0021 | 1   | .   |                             |        |        |        |         |         |   |
| 5554   | N   | N   | . ASP ASP ASP B B 293 293 . | 0.0703 | 0.0587 | 0.0697 | 0.0158  | 0.0002  |   |
| 0.0074 | 1   | .   |                             |        |        |        |         |         |   |
| 5555   | CA  | CA  | . ASP ASP ASP B B 293 293 . | 0.0907 | 0.0746 | 0.0622 | 0.0031  | -0.0065 | - |
| 0.0051 | 1   | .   |                             |        |        |        |         |         |   |
| 5556   | CB  | CB  | . ASP ASP ASP B B 293 293 . | 0.0811 | 0.0982 | 0.0807 | -0.0007 | 0.0074  |   |
| 0.0047 | 1   | .   |                             |        |        |        |         |         |   |
| 5557   | CG  | CG  | . ASP ASP ASP B B 293 293 . | 0.0856 | 0.0867 | 0.0763 | 0.0244  | -0.0002 |   |
| 0.0078 | 1   | .   |                             |        |        |        |         |         |   |
| 5558   | OD1 | OD1 | . ASP ASP ASP B B 293 293 . | 0.0992 | 0.1090 | 0.0896 | -0.0042 | 0.0071  |   |
| 0.0049 | 1   | .   |                             |        |        |        |         |         |   |
| 5559   | OD2 | OD2 | . ASP ASP ASP B B 293 293 . | 0.1000 | 0.0981 | 0.0774 | 0.0157  | 0.0058  | - |
| 0.0069 | 1   | .   |                             |        |        |        |         |         |   |
| 5560   | C   | C   | . ASP ASP ASP B B 293 293 . | 0.0866 | 0.0606 | 0.0855 | 0.0091  | 0.0001  |   |
| 0.0007 | 1   | .   |                             |        |        |        |         |         |   |
| 5561   | O   | O   | . ASP ASP ASP B B 293 293 . | 0.0878 | 0.0835 | 0.0623 | -0.0011 | 0.0015  | - |
| 0.0006 | 1   | .   |                             |        |        |        |         |         |   |
| 5562   | N   | N   | . PRO PRO PRO B B 294 294 . | 0.0965 | 0.0680 | 0.0856 | -0.0116 | -0.0030 |   |
| 0.0142 | 1   | .   |                             |        |        |        |         |         |   |
| 5563   | CA  | CA  | . PRO PRO PRO B B 294 294 . | 0.1014 | 0.0751 | 0.0843 | -0.0049 | 0.0097  | - |
| 0.0177 | 1   | .   |                             |        |        |        |         |         |   |
| 5564   | CB  | CB  | . PRO PRO PRO B B 294 294 . | 0.1000 | 0.0879 | 0.0869 | 0.0039  | -0.0040 | - |
| 0.0326 | 1   | .   |                             |        |        |        |         |         |   |
| 5565   | CG  | CG  | . PRO PRO PRO B B 294 294 . | 0.1038 | 0.0752 | 0.0706 | -0.0283 | 0.0294  |   |
| 0.0186 | 1   | .   |                             |        |        |        |         |         |   |
| 5566   | CD  | CD  | . PRO PRO PRO B B 294 294 . | 0.1306 | 0.1088 | 0.0653 | -0.0056 | -0.0007 |   |
| 0.0150 | 1   | .   |                             |        |        |        |         |         |   |
| 5567   | C   | C   | . PRO PRO PRO B B 294 294 . | 0.0799 | 0.0718 | 0.0729 | -0.0003 | -0.0064 |   |
| 0.0059 | 1   | .   |                             |        |        |        |         |         |   |
| 5568   | O   | O   | . PRO PRO PRO B B 294 294 . | 0.0984 | 0.0867 | 0.0914 | 0.0061  | 0.0083  | - |
| 0.0076 | 1   | .   |                             |        |        |        |         |         |   |
| 5569   | N   | N   | . PHE PHE PHE B B 295 295 . | 0.1000 | 0.0618 | 0.0912 | 0.0075  | -0.0036 |   |
| 0.0014 | 1   | .   |                             |        |        |        |         |         |   |
| 5570   | CA  | CA  | . PHE PHE PHE B B 295 295 . | 0.1054 | 0.0670 | 0.0692 | -0.0011 | 0.0027  | - |
| 0.0109 | 1   | .   |                             |        |        |        |         |         |   |
| 5571   | CB  | CB  | . PHE PHE PHE B B 295 295 . | 0.1018 | 0.1148 | 0.0745 | 0.0059  | 0.0008  |   |
| 0.0138 | 1   | .   |                             |        |        |        |         |         |   |
| 5572   | CG  | CG  | . PHE PHE PHE B B 295 295 . | 0.0782 | 0.0980 | 0.0977 | -0.0027 | -0.0107 |   |
| 0.0099 | 1   | .   |                             |        |        |        |         |         |   |



|        |     |     |                             |        |        |        |         |         |   |
|--------|-----|-----|-----------------------------|--------|--------|--------|---------|---------|---|
| 5603   | C   | C   | . ASP ASP ASP B B 298 298 . | 0.1084 | 0.0859 | 0.0915 | -0.0030 | 0.0088  |   |
| 0.0065 | 1   | .   |                             |        |        |        |         |         |   |
| 5604   | O   | O   | . ASP ASP ASP B B 298 298 . | 0.1008 | 0.0854 | 0.0908 | 0.0221  | -0.0081 |   |
| 0.0068 | 1   | .   |                             |        |        |        |         |         |   |
| 5605   | N   | N   | . ASP ASP ASP B B 299 299 . | 0.1064 | 0.0825 | 0.0835 | 0.0004  | 0.0085  | - |
| 0.0045 | 1   | .   |                             |        |        |        |         |         |   |
| 5606   | CA  | CA  | . ASP ASP ASP B B 299 299 . | 0.0881 | 0.0762 | 0.0854 | -0.0154 | 0.0101  | - |
| 0.0013 | 1   | .   |                             |        |        |        |         |         |   |
| 5607   | CB  | CB  | . ASP ASP ASP B B 299 299 . | 0.0952 | 0.0798 | 0.0817 | -0.0019 | 0.0085  |   |
| 0.0033 | 1   | .   |                             |        |        |        |         |         |   |
| 5608   | CG  | CG  | . ASP ASP ASP B B 299 299 . | 0.1109 | 0.0912 | 0.1128 | 0.0026  | -0.0167 | - |
| 0.0053 | 1   | .   |                             |        |        |        |         |         |   |
| 5609   | OD1 | OD1 | . ASP ASP ASP B B 299 299 . | 0.1029 | 0.0747 | 0.0833 | 0.0003  | 0.0037  |   |
| 0.0051 | 1   | .   |                             |        |        |        |         |         |   |
| 5610   | OD2 | OD2 | . ASP ASP ASP B B 299 299 . | 0.1190 | 0.0933 | 0.1266 | 0.0115  | -0.0010 |   |
| 0.0168 | 1   | .   |                             |        |        |        |         |         |   |
| 5611   | C   | C   | . ASP ASP ASP B B 299 299 . | 0.0809 | 0.0931 | 0.0990 | -0.0140 | 0.0071  | - |
| 0.0070 | 1   | .   |                             |        |        |        |         |         |   |
| 5612   | O   | O   | . ASP ASP ASP B B 299 299 . | 0.1081 | 0.0935 | 0.1076 | 0.0070  | 0.0016  |   |
| 0.0066 | 1   | .   |                             |        |        |        |         |         |   |
| 5613   | N   | N   | . TRP TRP TRP B B 300 300 . | 0.0901 | 0.0806 | 0.0868 | 0.0126  | -0.0044 | - |
| 0.0035 | 1   | .   |                             |        |        |        |         |         |   |
| 5614   | CA  | CA  | . TRP TRP TRP B B 300 300 . | 0.0802 | 0.0980 | 0.1051 | 0.0130  | 0.0095  | - |
| 0.0059 | 1   | .   |                             |        |        |        |         |         |   |
| 5615   | CB  | CB  | . TRP TRP TRP B B 300 300 . | 0.0698 | 0.1118 | 0.0879 | 0.0246  | -0.0082 | - |
| 0.0105 | 1   | .   |                             |        |        |        |         |         |   |
| 5616   | CG  | CG  | . TRP TRP TRP B B 300 300 . | 0.1088 | 0.0817 | 0.0991 | 0.0077  | -0.0007 |   |
| 0.0063 | 1   | .   |                             |        |        |        |         |         |   |
| 5617   | CD1 | CD1 | . TRP TRP TRP B B 300 300 . | 0.1404 | 0.1054 | 0.1318 | 0.0114  | -0.0120 | - |
| 0.0017 | 1   | .   |                             |        |        |        |         |         |   |
| 5618   | NE1 | NE1 | . TRP TRP TRP B B 300 300 . | 0.1458 | 0.1078 | 0.1473 | -0.0050 | -0.0174 | - |
| 0.0153 | 1   | .   |                             |        |        |        |         |         |   |
| 5619   | CE2 | CE2 | . TRP TRP TRP B B 300 300 . | 0.1171 | 0.0790 | 0.1167 | -0.0093 | -0.0097 |   |
| 0.0121 | 1   | .   |                             |        |        |        |         |         |   |
| 5620   | CD2 | CD2 | . TRP TRP TRP B B 300 300 . | 0.1174 | 0.1042 | 0.1214 | -0.0002 | 0.0119  |   |
| 0.0151 | 1   | .   |                             |        |        |        |         |         |   |
| 5621   | CE3 | CE3 | . TRP TRP TRP B B 300 300 . | 0.1434 | 0.1010 | 0.1084 | -0.0128 | 0.0010  |   |
| 0.0108 | 1   | .   |                             |        |        |        |         |         |   |
| 5622   | CZ3 | CZ3 | . TRP TRP TRP B B 300 300 . | 0.1721 | 0.1246 | 0.1102 | -0.0384 | 0.0054  |   |
| 0.0080 | 1   | .   |                             |        |        |        |         |         |   |
| 5623   | CH2 | CH2 | . TRP TRP TRP B B 300 300 . | 0.1182 | 0.1094 | 0.1086 | -0.0013 | -0.0107 |   |
| 0.0124 | 1   | .   |                             |        |        |        |         |         |   |
| 5624   | CZ2 | CZ2 | . TRP TRP TRP B B 300 300 . | 0.1246 | 0.1160 | 0.1238 | 0.0216  | 0.0092  |   |
| 0.0062 | 1   | .   |                             |        |        |        |         |         |   |
| 5625   | C   | C   | . TRP TRP TRP B B 300 300 . | 0.1050 | 0.0989 | 0.1105 | 0.0005  | 0.0050  | - |
| 0.0083 | 1   | .   |                             |        |        |        |         |         |   |
| 5626   | O   | O   | . TRP TRP TRP B B 300 300 . | 0.1202 | 0.0882 | 0.0909 | -0.0025 | 0.0061  | - |
| 0.0146 | 1   | .   |                             |        |        |        |         |         |   |
| 5627   | N   | N   | . ALA ALA ALA B B 301 301 . | 0.1039 | 0.0846 | 0.0706 | 0.0074  | 0.0084  |   |
| 0.0063 | 1   | .   |                             |        |        |        |         |         |   |
| 5628   | CA  | CA  | . ALA ALA ALA B B 301 301 . | 0.1101 | 0.0778 | 0.0866 | 0.0053  | 0.0214  |   |
| 0.0044 | 1   | .   |                             |        |        |        |         |         |   |
| 5629   | CB  | CB  | . ALA ALA ALA B B 301 301 . | 0.1066 | 0.0778 | 0.0841 | -0.0015 | 0.0045  |   |
| 0.0080 | 1   | .   |                             |        |        |        |         |         |   |
| 5630   | C   | C   | . ALA ALA ALA B B 301 301 . | 0.1082 | 0.0846 | 0.0918 | -0.0022 | 0.0038  |   |
| 0.0119 | 1   | .   |                             |        |        |        |         |         |   |
| 5631   | O   | O   | . ALA ALA ALA B B 301 301 . | 0.1199 | 0.0763 | 0.0924 | -0.0018 | -0.0044 |   |
| 0.0110 | 1   | .   |                             |        |        |        |         |         |   |
| 5632   | N   | N   | . ALA ALA ALA B B 302 302 . | 0.0882 | 0.0942 | 0.0819 | 0.0070  | 0.0018  |   |
| 0.0124 | 1   | .   |                             |        |        |        |         |         |   |

|        |     |     |                             |        |        |        |         |         |   |
|--------|-----|-----|-----------------------------|--------|--------|--------|---------|---------|---|
| 5633   | CA  | CA  | . ALA ALA ALA B B 302 302 . | 0.1070 | 0.0888 | 0.1038 | 0.0051  | -0.0009 |   |
| 0.0107 | 1   | .   |                             |        |        |        |         |         |   |
| 5634   | CB  | CB  | . ALA ALA ALA B B 302 302 . | 0.0957 | 0.0711 | 0.0804 | 0.0021  | -0.0221 | - |
| 0.0117 | 1   | .   |                             |        |        |        |         |         |   |
| 5635   | C   | C   | . ALA ALA ALA B B 302 302 . | 0.1362 | 0.0865 | 0.0925 | 0.0027  | 0.0073  |   |
| 0.0052 | 1   | .   |                             |        |        |        |         |         |   |
| 5636   | O   | O   | . ALA ALA ALA B B 302 302 . | 0.1099 | 0.0933 | 0.0835 | 0.0118  | 0.0140  | - |
| 0.0002 | 1   | .   |                             |        |        |        |         |         |   |
| 5637   | N   | N   | . TRP TRP TRP B B 303 303 . | 0.1000 | 0.0776 | 0.0996 | -0.0070 | -0.0073 |   |
| 0.0008 | 1   | .   |                             |        |        |        |         |         |   |
| 5638   | CA  | CA  | . TRP TRP TRP B B 303 303 . | 0.1188 | 0.0824 | 0.0985 | -0.0143 | 0.0062  | - |
| 0.0048 | 1   | .   |                             |        |        |        |         |         |   |
| 5639   | CB  | CB  | . TRP TRP TRP B B 303 303 . | 0.0978 | 0.0729 | 0.0755 | -0.0015 | -0.0116 |   |
| 0.0110 | 1   | .   |                             |        |        |        |         |         |   |
| 5640   | CG  | CG  | . TRP TRP TRP B B 303 303 . | 0.1203 | 0.0711 | 0.0599 | 0.0044  | -0.0103 | - |
| 0.0022 | 1   | .   |                             |        |        |        |         |         |   |
| 5641   | CD1 | CD1 | . TRP TRP TRP B B 303 303 . | 0.1097 | 0.0774 | 0.0584 | 0.0092  | -0.0132 | - |
| 0.0067 | 1   | .   |                             |        |        |        |         |         |   |
| 5642   | NE1 | NE1 | . TRP TRP TRP B B 303 303 . | 0.0873 | 0.0793 | 0.0846 | -0.0020 | -0.0014 |   |
| 0.0116 | 1   | .   |                             |        |        |        |         |         |   |
| 5643   | CE2 | CE2 | . TRP TRP TRP B B 303 303 . | 0.0850 | 0.0557 | 0.0736 | 0.0146  | -0.0008 |   |
| 0.0105 | 1   | .   |                             |        |        |        |         |         |   |
| 5644   | CD2 | CD2 | . TRP TRP TRP B B 303 303 . | 0.1091 | 0.0663 | 0.0888 | -0.0011 | 0.0082  | - |
| 0.0063 | 1   | .   |                             |        |        |        |         |         |   |
| 5645   | CE3 | CE3 | . TRP TRP TRP B B 303 303 . | 0.1235 | 0.0527 | 0.0846 | -0.0057 | -0.0071 |   |
| 0.0191 | 1   | .   |                             |        |        |        |         |         |   |
| 5646   | CZ3 | CZ3 | . TRP TRP TRP B B 303 303 . | 0.1080 | 0.1054 | 0.0754 | -0.0135 | 0.0000  |   |
| 0.0229 | 1   | .   |                             |        |        |        |         |         |   |
| 5647   | CH2 | CH2 | . TRP TRP TRP B B 303 303 . | 0.0769 | 0.0771 | 0.0719 | -0.0122 | -0.0041 | - |
| 0.0093 | 1   | .   |                             |        |        |        |         |         |   |
| 5648   | CZ2 | CZ2 | . TRP TRP TRP B B 303 303 . | 0.0975 | 0.0747 | 0.1136 | 0.0009  | 0.0139  |   |
| 0.0056 | 1   | .   |                             |        |        |        |         |         |   |
| 5649   | C   | C   | . TRP TRP TRP B B 303 303 . | 0.1064 | 0.0938 | 0.0954 | -0.0022 | 0.0017  |   |
| 0.0035 | 1   | .   |                             |        |        |        |         |         |   |
| 5650   | O   | O   | . TRP TRP TRP B B 303 303 . | 0.1463 | 0.0820 | 0.0847 | -0.0133 | 0.0114  | - |
| 0.0060 | 1   | .   |                             |        |        |        |         |         |   |
| 5651   | N   | N   | . SER SER SER B B 304 304 . | 0.1258 | 0.0979 | 0.0783 | -0.0049 | -0.0073 |   |
| 0.0116 | 1   | .   |                             |        |        |        |         |         |   |
| 5652   | CA  | CA  | . SER SER SER B B 304 304 . | 0.1239 | 0.1037 | 0.0956 | 0.0192  | -0.0052 | - |
| 0.0019 | 1   | .   |                             |        |        |        |         |         |   |
| 5653   | CB  | CB  | . SER SER SER B B 304 304 . | 0.1107 | 0.1192 | 0.1129 | 0.0466  | -0.0083 |   |
| 0.0014 | 1   | .   |                             |        |        |        |         |         |   |
| 5654   | OG  | OG  | . SER SER SER B B 304 304 . | 0.1417 | 0.1424 | 0.1197 | 0.0146  | 0.0081  |   |
| 0.0107 | 1   | .   |                             |        |        |        |         |         |   |
| 5655   | C   | C   | . SER SER SER B B 304 304 . | 0.1202 | 0.0973 | 0.0731 | 0.0053  | -0.0046 |   |
| 0.0038 | 1   | .   |                             |        |        |        |         |         |   |
| 5656   | O   | O   | . SER SER SER B B 304 304 . | 0.1535 | 0.0882 | 0.1016 | -0.0122 | 0.0042  | - |
| 0.0075 | 1   | .   |                             |        |        |        |         |         |   |
| 5657   | N   | N   | . LYS LYS LYS B B 305 305 . | 0.1127 | 0.0960 | 0.0816 | 0.0129  | 0.0108  |   |
| 0.0019 | 1   | .   |                             |        |        |        |         |         |   |
| 5658   | CA  | CA  | . LYS LYS LYS B B 305 305 . | 0.1211 | 0.1046 | 0.0903 | -0.0018 | 0.0070  |   |
| 0.0106 | 1   | .   |                             |        |        |        |         |         |   |
| 5659   | CB  | CB  | . LYS LYS LYS B B 305 305 . | 0.1239 | 0.1196 | 0.1306 | -0.0046 | 0.0009  |   |
| 0.0143 | 1   | .   |                             |        |        |        |         |         |   |
| 5660   | CG  | CG  | . LYS LYS LYS B B 305 305 . | 0.1935 | 0.1972 | 0.1726 | -0.0078 | 0.0296  | - |
| 0.0416 | 1   | .   |                             |        |        |        |         |         |   |
| 5661   | CD  | CD  | . LYS LYS LYS B B 305 305 . | 0.2025 | 0.2598 | 0.2531 | -0.0865 | 0.0663  | - |
| 0.0085 | 1   | .   |                             |        |        |        |         |         |   |
| 5662   | CE  | CE  | . LYS LYS LYS B B 305 305 . | 0.3546 | 0.3316 | 0.3803 | -0.1172 | 0.0859  |   |
| 0.0109 | 1   | .   |                             |        |        |        |         |         |   |



|        |     |     |                             |        |        |        |         |         |   |
|--------|-----|-----|-----------------------------|--------|--------|--------|---------|---------|---|
| 5693   | OD1 | OD1 | . ASN ASN ASN B B 309 309 . | 0.4014 | 0.2844 | 0.3534 | -0.0590 | -0.0442 |   |
| 0.0660 | 1   | .   |                             |        |        |        |         |         |   |
| 5694   | ND2 | ND2 | . ASN ASN ASN B B 309 309 . | 0.3074 | 0.2338 | 0.3653 | -0.0734 | 0.0865  | - |
| 0.0463 | 1   | .   |                             |        |        |        |         |         |   |
| 5695   | C   | C   | . ASN ASN ASN B B 309 309 . | 0.1139 | 0.1075 | 0.0882 | -0.0016 | -0.0050 | - |
| 0.0201 | 1   | .   |                             |        |        |        |         |         |   |
| 5696   | O   | O   | . ASN ASN ASN B B 309 309 . | 0.1465 | 0.1585 | 0.1574 | -0.0083 | 0.0112  |   |
| 0.0099 | 1   | .   |                             |        |        |        |         |         |   |
| 5697   | N   | N   | . VAL VAL VAL B B 310 310 . | 0.1417 | 0.0904 | 0.0935 | -0.0113 | -0.0089 | - |
| 0.0149 | 1   | .   |                             |        |        |        |         |         |   |
| 5698   | CA  | CA  | . VAL VAL VAL B B 310 310 . | 0.1462 | 0.0972 | 0.0847 | -0.0152 | -0.0288 | - |
| 0.0129 | 1   | .   |                             |        |        |        |         |         |   |
| 5699   | CB  | CB  | . VAL VAL VAL B B 310 310 . | 0.1239 | 0.1313 | 0.1050 | -0.0168 | -0.0199 |   |
| 0.0144 | 1   | .   |                             |        |        |        |         |         |   |
| 5700   | CG1 | CG1 | . VAL VAL VAL B B 310 310 . | 0.1913 | 0.1752 | 0.1817 | -0.0159 | -0.0246 | - |
| 0.0148 | 1   | .   |                             |        |        |        |         |         |   |
| 5701   | CG2 | CG2 | . VAL VAL VAL B B 310 310 . | 0.2252 | 0.1087 | 0.1298 | 0.0208  | -0.0033 |   |
| 0.0059 | 1   | .   |                             |        |        |        |         |         |   |
| 5702   | C   | C   | . VAL VAL VAL B B 310 310 . | 0.1125 | 0.1082 | 0.0955 | 0.0083  | -0.0115 | - |
| 0.0052 | 1   | .   |                             |        |        |        |         |         |   |
| 5703   | O   | O   | . VAL VAL VAL B B 310 310 . | 0.1072 | 0.1101 | 0.1187 | -0.0009 | 0.0119  | - |
| 0.0121 | 1   | .   |                             |        |        |        |         |         |   |
| 5704   | N   | N   | . GLY GLY GLY B B 311 311 . | 0.1405 | 0.1075 | 0.0914 | -0.0036 | -0.0032 | - |
| 0.0075 | 1   | .   |                             |        |        |        |         |         |   |
| 5705   | CA  | CA  | . GLY GLY GLY B B 311 311 . | 0.1321 | 0.1269 | 0.0752 | -0.0257 | -0.0037 | - |
| 0.0067 | 1   | .   |                             |        |        |        |         |         |   |
| 5706   | C   | C   | . GLY GLY GLY B B 311 311 . | 0.1217 | 0.1314 | 0.0968 | -0.0243 | -0.0022 |   |
| 0.0056 | 1   | .   |                             |        |        |        |         |         |   |
| 5707   | O   | O   | . GLY GLY GLY B B 311 311 . | 0.1729 | 0.1255 | 0.1176 | -0.0389 | -0.0100 | - |
| 0.0039 | 1   | .   |                             |        |        |        |         |         |   |
| 5708   | N   | N   | . ILE ILE ILE B B 312 312 . | 0.1186 | 0.0962 | 0.0842 | -0.0064 | 0.0023  |   |
| 0.0055 | 1   | .   |                             |        |        |        |         |         |   |
| 5709   | CA  | CA  | . ILE ILE ILE B B 312 312 . | 0.1256 | 0.1228 | 0.0943 | -0.0102 | 0.0042  |   |
| 0.0043 | 1   | .   |                             |        |        |        |         |         |   |
| 5710   | CB  | CB  | . ILE ILE ILE B B 312 312 . | 0.0885 | 0.1156 | 0.1054 | 0.0005  | -0.0048 |   |
| 0.0056 | 1   | .   |                             |        |        |        |         |         |   |
| 5711   | CG1 | CG1 | . ILE ILE ILE B B 312 312 . | 0.1306 | 0.1271 | 0.0983 | -0.0072 | -0.0248 |   |
| 0.0080 | 1   | .   |                             |        |        |        |         |         |   |
| 5712   | CD  | CD  | . ILE ILE ILE B B 312 312 . | 0.1832 | 0.1889 | 0.1147 | -0.0183 | -0.0435 | - |
| 0.0219 | 1   | .   |                             |        |        |        |         |         |   |
| 5713   | CG2 | CG2 | . ILE ILE ILE B B 312 312 . | 0.1196 | 0.1225 | 0.1275 | -0.0020 | 0.0283  |   |
| 0.0094 | 1   | .   |                             |        |        |        |         |         |   |
| 5714   | C   | C   | . ILE ILE ILE B B 312 312 . | 0.1108 | 0.0924 | 0.0926 | 0.0103  | 0.0038  |   |
| 0.0021 | 1   | .   |                             |        |        |        |         |         |   |
| 5715   | O   | O   | . ILE ILE ILE B B 312 312 . | 0.1429 | 0.1105 | 0.0981 | 0.0106  | 0.0116  |   |
| 0.0120 | 1   | .   |                             |        |        |        |         |         |   |
| 5716   | N   | N   | . GLN GLN GLN B B 313 313 . | 0.0976 | 0.0841 | 0.0743 | -0.0054 | 0.0089  |   |
| 0.0070 | 1   | .   |                             |        |        |        |         |         |   |
| 5717   | CA  | CA  | . GLN GLN GLN B B 313 313 . | 0.1131 | 0.0710 | 0.0859 | 0.0046  | 0.0258  |   |
| 0.0136 | 1   | .   |                             |        |        |        |         |         |   |
| 5718   | CB  | CB  | . GLN GLN GLN B B 313 313 . | 0.1091 | 0.0820 | 0.0722 | 0.0128  | 0.0165  |   |
| 0.0311 | 1   | .   |                             |        |        |        |         |         |   |
| 5719   | CG  | CG  | . GLN GLN GLN B B 313 313 . | 0.1355 | 0.1103 | 0.1294 | -0.0107 | 0.0418  |   |
| 0.0127 | 1   | .   |                             |        |        |        |         |         |   |
| 5720   | CD  | CD  | . GLN GLN GLN B B 313 313 . | 0.1305 | 0.0942 | 0.0930 | -0.0092 | 0.0105  |   |
| 0.0111 | 1   | .   |                             |        |        |        |         |         |   |
| 5721   | OE1 | OE1 | . GLN GLN GLN B B 313 313 . | 0.1708 | 0.1438 | 0.1173 | -0.0145 | -0.0055 |   |
| 0.0074 | 1   | .   |                             |        |        |        |         |         |   |
| 5722   | NE2 | NE2 | . GLN GLN GLN B B 313 313 . | 0.1270 | 0.1042 | 0.1141 | 0.0133  | -0.0173 | - |
| 0.0066 | 1   | .   |                             |        |        |        |         |         |   |



|        |     |     |                             |        |        |        |         |         |   |
|--------|-----|-----|-----------------------------|--------|--------|--------|---------|---------|---|
| 5753   | CA  | CA  | . ASP ASP ASP B B 318 318 . | 0.0785 | 0.0776 | 0.0824 | 0.0131  | -0.0113 |   |
| 0.0007 | 1   | .   |                             |        |        |        |         |         |   |
| 5754   | CB  | CB  | . ASP ASP ASP B B 318 318 . | 0.0894 | 0.0836 | 0.0764 | 0.0127  | -0.0166 | - |
| 0.0043 | 1   | .   |                             |        |        |        |         |         |   |
| 5755   | CG  | CG  | . ASP ASP ASP B B 318 318 . | 0.1076 | 0.1075 | 0.0781 | 0.0048  | 0.0062  | - |
| 0.0105 | 1   | .   |                             |        |        |        |         |         |   |
| 5756   | OD1 | OD1 | . ASP ASP ASP B B 318 318 . | 0.0972 | 0.0978 | 0.0830 | 0.0178  | 0.0010  |   |
| 0.0020 | 1   | .   |                             |        |        |        |         |         |   |
| 5757   | OD2 | OD2 | . ASP ASP ASP B B 318 318 . | 0.1176 | 0.1295 | 0.1103 | 0.0142  | -0.0107 | - |
| 0.0034 | 1   | .   |                             |        |        |        |         |         |   |
| 5758   | C   | C   | . ASP ASP ASP B B 318 318 . | 0.1017 | 0.0825 | 0.0586 | 0.0125  | 0.0137  |   |
| 0.0142 | 1   | .   |                             |        |        |        |         |         |   |
| 5759   | O   | O   | . ASP ASP ASP B B 318 318 . | 0.1062 | 0.0888 | 0.0984 | 0.0066  | 0.0054  | - |
| 0.0001 | 1   | .   |                             |        |        |        |         |         |   |
| 5760   | N   | N   | . LEU LEU LEU B B 319 319 . | 0.1164 | 0.1007 | 0.0713 | -0.0036 | -0.0004 |   |
| 0.0061 | 1   | .   |                             |        |        |        |         |         |   |
| 5761   | CA  | CA  | . LEU LEU LEU B B 319 319 . | 0.0724 | 0.0718 | 0.0847 | 0.0151  | 0.0071  |   |
| 0.0142 | 1   | .   |                             |        |        |        |         |         |   |
| 5762   | CB  | CB  | . LEU LEU LEU B B 319 319 . | 0.0889 | 0.0998 | 0.0582 | 0.0047  | -0.0225 | - |
| 0.0100 | 1   | .   |                             |        |        |        |         |         |   |
| 5763   | CG  | CG  | . LEU LEU LEU B B 319 319 . | 0.1003 | 0.0749 | 0.0799 | 0.0175  | -0.0244 |   |
| 0.0003 | 1   | .   |                             |        |        |        |         |         |   |
| 5764   | CD1 | CD1 | . LEU LEU LEU B B 319 319 . | 0.1177 | 0.0795 | 0.1037 | -0.0092 | -0.0041 |   |
| 0.0067 | 1   | .   |                             |        |        |        |         |         |   |
| 5765   | CD2 | CD2 | . LEU LEU LEU B B 319 319 . | 0.1241 | 0.0886 | 0.0947 | 0.0159  | 0.0048  | - |
| 0.0141 | 1   | .   |                             |        |        |        |         |         |   |
| 5766   | C   | C   | . LEU LEU LEU B B 319 319 . | 0.0770 | 0.0891 | 0.0842 | 0.0111  | -0.0063 |   |
| 0.0147 | 1   | .   |                             |        |        |        |         |         |   |
| 5767   | O   | O   | . LEU LEU LEU B B 319 319 . | 0.1209 | 0.0806 | 0.0958 | 0.0231  | 0.0226  | - |
| 0.0054 | 1   | .   |                             |        |        |        |         |         |   |
| 5768   | N   | N   | . THR THR THR B B 320 320 . | 0.0746 | 0.0728 | 0.0643 | 0.0022  | 0.0101  |   |
| 0.0087 | 1   | .   |                             |        |        |        |         |         |   |
| 5769   | CA  | CA  | . THR THR THR B B 320 320 . | 0.0922 | 0.0666 | 0.0899 | 0.0064  | 0.0078  |   |
| 0.0035 | 1   | .   |                             |        |        |        |         |         |   |
| 5770   | CB  | CB  | . THR THR THR B B 320 320 . | 0.0920 | 0.0882 | 0.0770 | 0.0124  | -0.0155 | - |
| 0.0175 | 1   | .   |                             |        |        |        |         |         |   |
| 5771   | OG1 | OG1 | . THR THR THR B B 320 320 . | 0.1054 | 0.0959 | 0.0920 | 0.0086  | -0.0026 | - |
| 0.0035 | 1   | .   |                             |        |        |        |         |         |   |
| 5772   | CG2 | CG2 | . THR THR THR B B 320 320 . | 0.0893 | 0.1243 | 0.0848 | -0.0203 | 0.0049  |   |
| 0.0122 | 1   | .   |                             |        |        |        |         |         |   |
| 5773   | C   | C   | . THR THR THR B B 320 320 . | 0.0918 | 0.0794 | 0.0987 | 0.0163  | 0.0040  |   |
| 0.0140 | 1   | .   |                             |        |        |        |         |         |   |
| 5774   | O   | O   | . THR THR THR B B 320 320 . | 0.0924 | 0.1167 | 0.0875 | 0.0129  | 0.0057  |   |
| 0.0152 | 1   | .   |                             |        |        |        |         |         |   |
| 5775   | N   | N   | . VAL VAL VAL B B 321 321 . | 0.0893 | 0.0874 | 0.0637 | 0.0043  | -0.0136 |   |
| 0.0094 | 1   | .   |                             |        |        |        |         |         |   |
| 5776   | CA  | CA  | . VAL VAL VAL B B 321 321 . | 0.0842 | 0.0788 | 0.0798 | -0.0060 | -0.0014 | - |
| 0.0125 | 1   | .   |                             |        |        |        |         |         |   |
| 5777   | CB  | CB  | . VAL VAL VAL B B 321 321 . | 0.1078 | 0.0811 | 0.1091 | 0.0051  | -0.0140 |   |
| 0.0223 | 1   | .   |                             |        |        |        |         |         |   |
| 5778   | CG1 | CG1 | . VAL VAL VAL B B 321 321 . | 0.0876 | 0.1112 | 0.1019 | 0.0030  | -0.0009 |   |
| 0.0126 | 1   | .   |                             |        |        |        |         |         |   |
| 5779   | CG2 | CG2 | . VAL VAL VAL B B 321 321 . | 0.1198 | 0.1299 | 0.1262 | 0.0447  | -0.0355 |   |
| 0.0328 | 1   | .   |                             |        |        |        |         |         |   |
| 5780   | C   | C   | . VAL VAL VAL B B 321 321 . | 0.0848 | 0.0976 | 0.1058 | -0.0020 | 0.0088  |   |
| 0.0044 | 1   | .   |                             |        |        |        |         |         |   |
| 5781   | O   | O   | . VAL VAL VAL B B 321 321 . | 0.1008 | 0.0953 | 0.0849 | -0.0011 | 0.0027  |   |
| 0.0074 | 1   | .   |                             |        |        |        |         |         |   |
| 5782   | N   | N   | . THR THR THR B B 322 322 . | 0.0984 | 0.0940 | 0.0801 | -0.0065 | -0.0091 |   |
| 0.0077 | 1   | .   |                             |        |        |        |         |         |   |



|        |     |     |                             |        |        |        |         |         |   |
|--------|-----|-----|-----------------------------|--------|--------|--------|---------|---------|---|
| 5783   | CA  | CA  | . THR THR THR B B 322 322 . | 0.0923 | 0.0941 | 0.0836 | 0.0032  | -0.0028 |   |
| 0.0163 | 1   | .   |                             |        |        |        |         |         |   |
| 5784   | CB  | CB  | . THR THR THR B B 322 322 . | 0.0954 | 0.1141 | 0.0863 | -0.0119 | 0.0238  |   |
| 0.0259 | 1   | .   |                             |        |        |        |         |         |   |
| 5785   | OG1 | OG1 | . THR THR THR B B 322 322 . | 0.1105 | 0.1043 | 0.1093 | 0.0234  | 0.0047  |   |
| 0.0103 | 1   | .   |                             |        |        |        |         |         |   |
| 5786   | CG2 | CG2 | . THR THR THR B B 322 322 . | 0.0915 | 0.1200 | 0.1216 | -0.0224 | 0.0016  | - |
| 0.0002 | 1   | .   |                             |        |        |        |         |         |   |
| 5787   | C   | C   | . THR THR THR B B 322 322 . | 0.0937 | 0.0933 | 0.0896 | 0.0139  | 0.0130  |   |
| 0.0033 | 1   | .   |                             |        |        |        |         |         |   |
| 5788   | O   | O   | . THR THR THR B B 322 322 . | 0.1013 | 0.1156 | 0.1176 | 0.0000  | -0.0018 |   |
| 0.0159 | 1   | .   |                             |        |        |        |         |         |   |
| 5789   | N   | N   | . ASN ASN ASN B B 323 323 . | 0.0935 | 0.1034 | 0.0997 | 0.0200  | 0.0044  |   |
| 0.0098 | 1   | .   |                             |        |        |        |         |         |   |
| 5790   | CA  | CA  | . ASN ASN ASN B B 323 323 . | 0.1145 | 0.1064 | 0.1116 | 0.0347  | -0.0155 |   |
| 0.0081 | 1   | .   |                             |        |        |        |         |         |   |
| 5791   | CB  | CB  | . ASN ASN ASN B B 323 323 . | 0.1224 | 0.1002 | 0.1164 | 0.0403  | -0.0190 | - |
| 0.0141 | 1   | .   |                             |        |        |        |         |         |   |
| 5792   | CG  | CG  | . ASN ASN ASN B B 323 323 . | 0.1311 | 0.1475 | 0.1333 | 0.0390  | -0.0069 | - |
| 0.0315 | 1   | .   |                             |        |        |        |         |         |   |
| 5793   | OD1 | OD1 | . ASN ASN ASN B B 323 323 . | 0.2182 | 0.1441 | 0.1861 | 0.0666  | -0.0497 | - |
| 0.0196 | 1   | .   |                             |        |        |        |         |         |   |
| 5794   | ND2 | ND2 | . ASN ASN ASN B B 323 323 . | 0.1594 | 0.1312 | 0.1271 | 0.0058  | -0.0045 | - |
| 0.0194 | 1   | .   |                             |        |        |        |         |         |   |
| 5795   | C   | C   | . ASN ASN ASN B B 323 323 . | 0.0985 | 0.1038 | 0.1148 | 0.0157  | -0.0035 |   |
| 0.0007 | 1   | .   |                             |        |        |        |         |         |   |
| 5796   | O   | O   | . ASN ASN ASN B B 323 323 . | 0.1109 | 0.1252 | 0.1117 | 0.0305  | -0.0036 |   |
| 0.0129 | 1   | .   |                             |        |        |        |         |         |   |
| 5797   | N   | N   | . PRO PRO PRO B B 324 324 . | 0.1151 | 0.1252 | 0.1038 | -0.0032 | 0.0046  |   |
| 0.0154 | 1   | .   |                             |        |        |        |         |         |   |
| 5798   | CA  | CA  | . PRO PRO PRO B B 324 324 . | 0.1088 | 0.1324 | 0.1228 | -0.0113 | -0.0062 |   |
| 0.0100 | 1   | .   |                             |        |        |        |         |         |   |
| 5799   | CB  | CB  | . PRO PRO PRO B B 324 324 . | 0.0871 | 0.1510 | 0.1245 | -0.0019 | -0.0141 |   |
| 0.0331 | 1   | .   |                             |        |        |        |         |         |   |
| 5800   | CG  | CG  | . PRO PRO PRO B B 324 324 . | 0.1318 | 0.1487 | 0.1507 | -0.0091 | -0.0254 |   |
| 0.0308 | 1   | .   |                             |        |        |        |         |         |   |
| 5801   | CD  | CD  | . PRO PRO PRO B B 324 324 . | 0.1008 | 0.1610 | 0.1241 | -0.0141 | 0.0160  |   |
| 0.0227 | 1   | .   |                             |        |        |        |         |         |   |
| 5802   | C   | C   | . PRO PRO PRO B B 324 324 . | 0.1016 | 0.1349 | 0.1175 | 0.0012  | -0.0017 | - |
| 0.0063 | 1   | .   |                             |        |        |        |         |         |   |
| 5803   | O   | O   | . PRO PRO PRO B B 324 324 . | 0.1204 | 0.1558 | 0.1287 | 0.0082  | -0.0162 |   |
| 0.0122 | 1   | .   |                             |        |        |        |         |         |   |
| 5804   | N   | N   | . LYS LYS LYS B B 325 325 . | 0.1133 | 0.1210 | 0.1424 | 0.0183  | -0.0032 |   |
| 0.0192 | 1   | .   |                             |        |        |        |         |         |   |
| 5805   | CA  | CA  | . LYS LYS LYS B B 325 325 . | 0.1395 | 0.1389 | 0.1544 | 0.0093  | 0.0135  |   |
| 0.0198 | 1   | .   |                             |        |        |        |         |         |   |
| 5806   | CB  | CB  | . LYS LYS LYS B B 325 325 . | 0.1579 | 0.1622 | 0.2152 | 0.0448  | 0.0049  | - |
| 0.0021 | 1   | .   |                             |        |        |        |         |         |   |
| 5807   | CG  | CG  | . LYS LYS LYS B B 325 325 . | 0.2400 | 0.2674 | 0.2914 | 0.0066  | 0.0203  |   |
| 0.0257 | 1   | .   |                             |        |        |        |         |         |   |
| 5808   | CD  | CD  | . LYS LYS LYS B B 325 325 . | 0.4494 | 0.3712 | 0.3977 | -0.0010 | -0.0226 | - |
| 0.0928 | 1   | .   |                             |        |        |        |         |         |   |
| 5809   | CE  | CE  | . LYS LYS LYS B B 325 325 . | 0.5931 | 0.4452 | 0.4445 | -0.0289 | -0.0279 | - |
| 0.0713 | 1   | .   |                             |        |        |        |         |         |   |
| 5810   | NZ  | NZ  | . LYS LYS LYS B B 325 325 . | 0.6992 | 0.5021 | 0.4844 | -0.0583 | -0.0257 | - |
| 0.0940 | 1   | .   |                             |        |        |        |         |         |   |
| 5811   | C   | C   | . LYS LYS LYS B B 325 325 . | 0.1375 | 0.1405 | 0.1516 | 0.0246  | 0.0101  |   |
| 0.0162 | 1   | .   |                             |        |        |        |         |         |   |
| 5812   | O   | O   | . LYS LYS LYS B B 325 325 . | 0.1551 | 0.1725 | 0.1406 | 0.0072  | -0.0108 |   |
| 0.0364 | 1   | .   |                             |        |        |        |         |         |   |

|        |     |     |                             |        |        |        |         |         |   |
|--------|-----|-----|-----------------------------|--------|--------|--------|---------|---------|---|
| 5813   | N   | N   | . ARG ARG ARG B B 326 326 . | 0.1039 | 0.1086 | 0.1289 | 0.0092  | -0.0087 |   |
| 0.0098 | 1   | .   |                             |        |        |        |         |         |   |
| 5814   | CA  | CA  | . ARG ARG ARG B B 326 326 . | 0.1315 | 0.1218 | 0.1203 | 0.0046  | -0.0015 | - |
| 0.0007 | 1   | .   |                             |        |        |        |         |         |   |
| 5815   | CB  | CB  | . ARG ARG ARG B B 326 326 . | 0.1513 | 0.1241 | 0.1646 | 0.0070  | -0.0032 | - |
| 0.0270 | 1   | .   |                             |        |        |        |         |         |   |
| 5816   | CG  | CG  | . ARG ARG ARG B B 326 326 . | 0.2135 | 0.2178 | 0.1928 | -0.0046 | -0.0284 | - |
| 0.0734 | 1   | .   |                             |        |        |        |         |         |   |
| 5817   | CD  | CD  | . ARG ARG ARG B B 326 326 . | 0.1208 | 0.2035 | 0.3499 | 0.0046  | 0.0989  | - |
| 0.0733 | 1   | .   |                             |        |        |        |         |         |   |
| 5818   | NE  | NE  | . ARG ARG ARG B B 326 326 . | 0.0968 | 0.1227 | 0.1583 | 0.0189  | 0.0109  | - |
| 0.0331 | 1   | .   |                             |        |        |        |         |         |   |
| 5819   | CZ  | CZ  | . ARG ARG ARG B B 326 326 . | 0.1335 | 0.1098 | 0.1425 | 0.0115  | -0.0033 | - |
| 0.0003 | 1   | .   |                             |        |        |        |         |         |   |
| 5820   | NH1 | NH1 | . ARG ARG ARG B B 326 326 . | 0.1959 | 0.1023 | 0.2260 | 0.0172  | -0.0535 | - |
| 0.0050 | 1   | .   |                             |        |        |        |         |         |   |
| 5821   | NH2 | NH2 | . ARG ARG ARG B B 326 326 . | 0.1495 | 0.1317 | 0.1312 | 0.0225  | 0.0255  |   |
| 0.0019 | 1   | .   |                             |        |        |        |         |         |   |
| 5822   | C   | C   | . ARG ARG ARG B B 326 326 . | 0.1079 | 0.1117 | 0.1139 | 0.0000  | 0.0047  |   |
| 0.0090 | 1   | .   |                             |        |        |        |         |         |   |
| 5823   | O   | O   | . ARG ARG ARG B B 326 326 . | 0.1286 | 0.1116 | 0.1178 | -0.0151 | -0.0103 |   |
| 0.0077 | 1   | .   |                             |        |        |        |         |         |   |
| 5824   | N   | N   | . ILE ILE ILE B B 327 327 . | 0.1081 | 0.0958 | 0.1160 | 0.0201  | -0.0068 |   |
| 0.0043 | 1   | .   |                             |        |        |        |         |         |   |
| 5825   | CA  | CA  | . ILE ILE ILE B B 327 327 . | 0.1143 | 0.1053 | 0.0988 | 0.0001  | -0.0052 |   |
| 0.0141 | 1   | .   |                             |        |        |        |         |         |   |
| 5826   | CB  | CB  | . ILE ILE ILE B B 327 327 . | 0.1237 | 0.1040 | 0.1150 | -0.0281 | -0.0176 |   |
| 0.0194 | 1   | .   |                             |        |        |        |         |         |   |
| 5827   | CG1 | CG1 | . ILE ILE ILE B B 327 327 . | 0.1259 | 0.1236 | 0.1047 | -0.0080 | -0.0003 |   |
| 0.0297 | 1   | .   |                             |        |        |        |         |         |   |
| 5828   | CD  | CD  | . ILE ILE ILE B B 327 327 . | 0.1121 | 0.1742 | 0.1627 | -0.0086 | 0.0205  |   |
| 0.0417 | 1   | .   |                             |        |        |        |         |         |   |
| 5829   | CG2 | CG2 | . ILE ILE ILE B B 327 327 . | 0.1508 | 0.1283 | 0.1617 | -0.0078 | 0.0212  | - |
| 0.0108 | 1   | .   |                             |        |        |        |         |         |   |
| 5830   | C   | C   | . ILE ILE ILE B B 327 327 . | 0.1190 | 0.1176 | 0.1208 | 0.0035  | -0.0119 | - |
| 0.0019 | 1   | .   |                             |        |        |        |         |         |   |
| 5831   | O   | O   | . ILE ILE ILE B B 327 327 . | 0.1268 | 0.1262 | 0.1210 | 0.0065  | -0.0077 |   |
| 0.0132 | 1   | .   |                             |        |        |        |         |         |   |
| 5832   | N   | N   | . GLU GLU GLU B B 328 328 . | 0.1573 | 0.1443 | 0.1392 | 0.0100  | -0.0163 |   |
| 0.0266 | 1   | .   |                             |        |        |        |         |         |   |
| 5833   | CA  | CA  | . GLU GLU GLU B B 328 328 . | 0.1565 | 0.1664 | 0.1345 | 0.0064  | -0.0118 |   |
| 0.0238 | 1   | .   |                             |        |        |        |         |         |   |
| 5834   | CB  | CB  | . GLU GLU GLU B B 328 328 . | 0.1408 | 0.1850 | 0.1397 | 0.0082  | -0.0396 |   |
| 0.0373 | 1   | .   |                             |        |        |        |         |         |   |
| 5835   | CG  | CG  | . GLU GLU GLU B B 328 328 . | 0.2404 | 0.2700 | 0.2485 | -0.0077 | -0.0278 |   |
| 0.0640 | 1   | .   |                             |        |        |        |         |         |   |
| 5836   | CD  | CD  | . GLU GLU GLU B B 328 328 . | 0.3811 | 0.5129 | 0.3543 | -0.0034 | -0.0558 |   |
| 0.0076 | 1   | .   |                             |        |        |        |         |         |   |
| 5837   | OE1 | OE1 | . GLU GLU GLU B B 328 328 . | 0.4158 | 0.6080 | 0.3644 | 0.0473  | -0.0699 |   |
| 0.0333 | 1   | .   |                             |        |        |        |         |         |   |
| 5838   | OE2 | OE2 | . GLU GLU GLU B B 328 328 . | 0.3540 | 0.5589 | 0.4234 | 0.0153  | -0.0656 |   |
| 0.0263 | 1   | .   |                             |        |        |        |         |         |   |
| 5839   | C   | C   | . GLU GLU GLU B B 328 328 . | 0.1452 | 0.1225 | 0.1314 | 0.0104  | -0.0185 |   |
| 0.0075 | 1   | .   |                             |        |        |        |         |         |   |
| 5840   | O   | O   | . GLU GLU GLU B B 328 328 . | 0.1517 | 0.1478 | 0.1444 | 0.0224  | -0.0111 |   |
| 0.0144 | 1   | .   |                             |        |        |        |         |         |   |
| 5841   | N   | N   | . ARG ARG ARG B B 329 329 . | 0.1393 | 0.1242 | 0.1309 | 0.0047  | -0.0288 |   |
| 0.0303 | 1   | .   |                             |        |        |        |         |         |   |
| 5842   | CA  | CA  | . ARG ARG ARG B B 329 329 . | 0.1457 | 0.1103 | 0.1378 | 0.0043  | -0.0023 |   |
| 0.0248 | 1   | .   |                             |        |        |        |         |         |   |

|        |     |     |                             |        |        |        |         |         |   |
|--------|-----|-----|-----------------------------|--------|--------|--------|---------|---------|---|
| 5843   | CB  | CB  | . ARG ARG ARG B B 329 329 . | 0.1523 | 0.1072 | 0.1314 | 0.0069  | -0.0029 |   |
| 0.0234 | 1   | .   |                             |        |        |        |         |         |   |
| 5844   | CG  | CG  | . ARG ARG ARG B B 329 329 . | 0.1509 | 0.1059 | 0.1487 | 0.0131  | -0.0051 |   |
| 0.0092 | 1   | .   |                             |        |        |        |         |         |   |
| 5845   | CD  | CD  | . ARG ARG ARG B B 329 329 . | 0.1465 | 0.1356 | 0.1626 | 0.0114  | 0.0212  | - |
| 0.0019 | 1   | .   |                             |        |        |        |         |         |   |
| 5846   | NE  | NE  | . ARG ARG ARG B B 329 329 . | 0.1529 | 0.1260 | 0.1894 | -0.0075 | -0.0126 |   |
| 0.0199 | 1   | .   |                             |        |        |        |         |         |   |
| 5847   | CZ  | CZ  | . ARG ARG ARG B B 329 329 . | 0.1659 | 0.1473 | 0.1456 | 0.0065  | -0.0124 |   |
| 0.0312 | 1   | .   |                             |        |        |        |         |         |   |
| 5848   | NH1 | NH1 | . ARG ARG ARG B B 329 329 . | 0.1703 | 0.1481 | 0.1672 | 0.0425  | -0.0129 | - |
| 0.0080 | 1   | .   |                             |        |        |        |         |         |   |
| 5849   | NH2 | NH2 | . ARG ARG ARG B B 329 329 . | 0.1568 | 0.1379 | 0.1800 | 0.0268  | 0.0016  |   |
| 0.0278 | 1   | .   |                             |        |        |        |         |         |   |
| 5850   | C   | C   | . ARG ARG ARG B B 329 329 . | 0.1332 | 0.1101 | 0.1181 | 0.0092  | 0.0142  |   |
| 0.0286 | 1   | .   |                             |        |        |        |         |         |   |
| 5851   | O   | O   | . ARG ARG ARG B B 329 329 . | 0.1461 | 0.1231 | 0.1071 | 0.0256  | -0.0064 |   |
| 0.0265 | 1   | .   |                             |        |        |        |         |         |   |
| 5852   | N   | N   | . ALA ALA ALA B B 330 330 . | 0.1366 | 0.1207 | 0.1160 | 0.0234  | -0.0108 |   |
| 0.0033 | 1   | .   |                             |        |        |        |         |         |   |
| 5853   | CA  | CA  | . ALA ALA ALA B B 330 330 . | 0.1152 | 0.1154 | 0.1195 | 0.0110  | -0.0112 |   |
| 0.0094 | 1   | .   |                             |        |        |        |         |         |   |
| 5854   | CB  | CB  | . ALA ALA ALA B B 330 330 . | 0.1092 | 0.1172 | 0.0861 | 0.0111  | -0.0341 |   |
| 0.0090 | 1   | .   |                             |        |        |        |         |         |   |
| 5855   | C   | C   | . ALA ALA ALA B B 330 330 . | 0.1199 | 0.1152 | 0.1341 | 0.0017  | -0.0044 | - |
| 0.0111 | 1   | .   |                             |        |        |        |         |         |   |
| 5856   | O   | O   | . ALA ALA ALA B B 330 330 . | 0.1402 | 0.1559 | 0.1060 | 0.0107  | -0.0183 | - |
| 0.0011 | 1   | .   |                             |        |        |        |         |         |   |
| 5857   | N   | N   | . VAL VAL VAL B B 331 331 . | 0.1307 | 0.1082 | 0.1185 | 0.0147  | -0.0223 |   |
| 0.0054 | 1   | .   |                             |        |        |        |         |         |   |
| 5858   | CA  | CA  | . VAL VAL VAL B B 331 331 . | 0.1389 | 0.1343 | 0.1283 | -0.0050 | -0.0105 | - |
| 0.0086 | 1   | .   |                             |        |        |        |         |         |   |
| 5859   | CB  | CB  | . VAL VAL VAL B B 331 331 . | 0.1405 | 0.1578 | 0.1336 | -0.0238 | -0.0106 |   |
| 0.0065 | 1   | .   |                             |        |        |        |         |         |   |
| 5860   | CG1 | CG1 | . VAL VAL VAL B B 331 331 . | 0.1997 | 0.1603 | 0.1719 | -0.0009 | -0.0033 | - |
| 0.0264 | 1   | .   |                             |        |        |        |         |         |   |
| 5861   | CG2 | CG2 | . VAL VAL VAL B B 331 331 . | 0.1603 | 0.1328 | 0.1361 | -0.0379 | -0.0082 |   |
| 0.0046 | 1   | .   |                             |        |        |        |         |         |   |
| 5862   | C   | C   | . VAL VAL VAL B B 331 331 . | 0.1418 | 0.1545 | 0.1348 | -0.0011 | -0.0220 | - |
| 0.0113 | 1   | .   |                             |        |        |        |         |         |   |
| 5863   | O   | O   | . VAL VAL VAL B B 331 331 . | 0.1463 | 0.1797 | 0.1530 | -0.0067 | -0.0141 | - |
| 0.0151 | 1   | .   |                             |        |        |        |         |         |   |
| 5864   | N   | N   | . GLU GLU GLU B B 332 332 . | 0.1507 | 0.1551 | 0.1271 | -0.0100 | -0.0378 |   |
| 0.0074 | 1   | .   |                             |        |        |        |         |         |   |
| 5865   | CA  | CA  | . GLU GLU GLU B B 332 332 . | 0.1693 | 0.1412 | 0.1298 | 0.0069  | -0.0230 |   |
| 0.0319 | 1   | .   |                             |        |        |        |         |         |   |
| 5866   | CB  | CB  | . GLU GLU GLU B B 332 332 . | 0.1986 | 0.1642 | 0.1454 | 0.0289  | 0.0067  |   |
| 0.0588 | 1   | .   |                             |        |        |        |         |         |   |
| 5867   | CG  | CG  | . GLU GLU GLU B B 332 332 . | 0.2903 | 0.2646 | 0.2860 | 0.0364  | -0.0113 |   |
| 0.0927 | 1   | .   |                             |        |        |        |         |         |   |
| 5868   | CD  | CD  | . GLU GLU GLU B B 332 332 . | 0.4686 | 0.3835 | 0.5243 | 0.0364  | -0.0032 |   |
| 0.0412 | 1   | .   |                             |        |        |        |         |         |   |
| 5869   | OE1 | OE1 | . GLU GLU GLU B B 332 332 . | 0.5385 | 0.5370 | 0.6578 | 0.0659  | 0.0062  |   |
| 0.0352 | 1   | .   |                             |        |        |        |         |         |   |
| 5870   | OE2 | OE2 | . GLU GLU GLU B B 332 332 . | 0.5045 | 0.4684 | 0.6174 | 0.1411  | 0.0120  |   |
| 0.0113 | 1   | .   |                             |        |        |        |         |         |   |
| 5871   | C   | C   | . GLU GLU GLU B B 332 332 . | 0.1616 | 0.1678 | 0.1423 | 0.0319  | -0.0172 |   |
| 0.0160 | 1   | .   |                             |        |        |        |         |         |   |
| 5872   | O   | O   | . GLU GLU GLU B B 332 332 . | 0.1863 | 0.2321 | 0.1540 | 0.0200  | -0.0313 |   |
| 0.0341 | 1   | .   |                             |        |        |        |         |         |   |

|        |     |     |                             |        |        |        |         |         |   |
|--------|-----|-----|-----------------------------|--------|--------|--------|---------|---------|---|
| 5873   | N   | N   | . GLU GLU GLU B B 333 333 . | 0.1445 | 0.1202 | 0.1439 | 0.0164  | -0.0237 |   |
| 0.0266 | 1   | .   |                             |        |        |        |         |         |   |
| 5874   | CA  | CA  | . GLU GLU GLU B B 333 333 . | 0.1426 | 0.1387 | 0.1547 | 0.0348  | -0.0058 |   |
| 0.0122 | 1   | .   |                             |        |        |        |         |         |   |
| 5875   | CB  | CB  | . GLU GLU GLU B B 333 333 . | 0.1682 | 0.1207 | 0.1701 | 0.0261  | 0.0166  | - |
| 0.0069 | 1   | .   |                             |        |        |        |         |         |   |
| 5876   | CG  | CG  | . GLU GLU GLU B B 333 333 . | 0.2047 | 0.1309 | 0.1905 | 0.0456  | -0.0308 |   |
| 0.0030 | 1   | .   |                             |        |        |        |         |         |   |
| 5877   | CD  | CD  | . GLU GLU GLU B B 333 333 . | 0.1793 | 0.1941 | 0.1560 | -0.0137 | 0.0165  |   |
| 0.0058 | 1   | .   |                             |        |        |        |         |         |   |
| 5878   | OE1 | OE1 | . GLU GLU GLU B B 333 333 . | 0.2309 | 0.1461 | 0.1697 | 0.0098  | 0.0013  |   |
| 0.0043 | 1   | .   |                             |        |        |        |         |         |   |
| 5879   | OE2 | OE2 | . GLU GLU GLU B B 333 333 . | 0.2016 | 0.1784 | 0.1781 | 0.0312  | -0.0134 | - |
| 0.0014 | 1   | .   |                             |        |        |        |         |         |   |
| 5880   | C   | C   | . GLU GLU GLU B B 333 333 . | 0.1455 | 0.1318 | 0.1084 | 0.0147  | -0.0082 |   |
| 0.0125 | 1   | .   |                             |        |        |        |         |         |   |
| 5881   | O   | O   | . GLU GLU GLU B B 333 333 . | 0.1588 | 0.1369 | 0.1462 | -0.0015 | 0.0010  | - |
| 0.0045 | 1   | .   |                             |        |        |        |         |         |   |
| 5882   | N   | N   | . LYS LYS LYS B B 334 334 . | 0.1492 | 0.1387 | 0.0876 | 0.0150  | -0.0149 |   |
| 0.0082 | 1   | .   |                             |        |        |        |         |         |   |
| 5883   | CA  | CA  | . LYS LYS LYS B B 334 334 . | 0.1228 | 0.1427 | 0.1065 | 0.0229  | 0.0096  | - |
| 0.0154 | 1   | .   |                             |        |        |        |         |         |   |
| 5884   | CB  | CB  | . LYS LYS LYS B B 334 334 . | 0.1434 | 0.1382 | 0.0924 | 0.0026  | -0.0016 | - |
| 0.0087 | 1   | .   |                             |        |        |        |         |         |   |
| 5885   | CG  | CG  | . LYS LYS LYS B B 334 334 . | 0.1857 | 0.2148 | 0.1732 | 0.0004  | -0.0211 | - |
| 0.0081 | 1   | .   |                             |        |        |        |         |         |   |
| 5886   | CD  | CD  | . LYS LYS LYS B B 334 334 . | 0.2115 | 0.2921 | 0.1365 | -0.0022 | -0.0441 | - |
| 0.0515 | 1   | .   |                             |        |        |        |         |         |   |
| 5887   | CE  | CE  | . LYS LYS LYS B B 334 334 . | 0.3559 | 0.3704 | 0.3289 | -0.0947 | -0.0795 | - |
| 0.0647 | 1   | .   |                             |        |        |        |         |         |   |
| 5888   | NZ  | NZ  | . LYS LYS LYS B B 334 334 . | 0.4131 | 0.3940 | 0.4580 | -0.1139 | -0.0569 | - |
| 0.0523 | 1   | .   |                             |        |        |        |         |         |   |
| 5889   | C   | C   | . LYS LYS LYS B B 334 334 . | 0.1215 | 0.0999 | 0.1019 | -0.0078 | 0.0016  | - |
| 0.0135 | 1   | .   |                             |        |        |        |         |         |   |
| 5890   | O   | O   | . LYS LYS LYS B B 334 334 . | 0.1305 | 0.1135 | 0.1062 | -0.0060 | -0.0013 | - |
| 0.0079 | 1   | .   |                             |        |        |        |         |         |   |
| 5891   | N   | N   | . ALA ALA ALA B B 335 335 . | 0.1164 | 0.1221 | 0.0949 | -0.0108 | -0.0115 | - |
| 0.0005 | 1   | .   |                             |        |        |        |         |         |   |
| 5892   | CA  | CA  | . ALA ALA ALA B B 335 335 . | 0.1159 | 0.1046 | 0.0947 | 0.0136  | -0.0281 | - |
| 0.0015 | 1   | .   |                             |        |        |        |         |         |   |
| 5893   | CB  | CB  | . ALA ALA ALA B B 335 335 . | 0.1458 | 0.1297 | 0.1183 | 0.0125  | 0.0096  | - |
| 0.0155 | 1   | .   |                             |        |        |        |         |         |   |
| 5894   | C   | C   | . ALA ALA ALA B B 335 335 . | 0.1162 | 0.1042 | 0.0833 | 0.0043  | -0.0027 | - |
| 0.0032 | 1   | .   |                             |        |        |        |         |         |   |
| 5895   | O   | O   | . ALA ALA ALA B B 335 335 . | 0.1277 | 0.1052 | 0.1124 | 0.0076  | -0.0169 | - |
| 0.0174 | 1   | .   |                             |        |        |        |         |         |   |
| 5896   | N   | N   | . CYS CYS CYS B B 336 336 . | 0.1299 | 0.1007 | 0.0879 | -0.0057 | -0.0028 |   |
| 0.0011 | 1   | .   |                             |        |        |        |         |         |   |
| 5897   | CA  | CA  | . CYS CYS CYS B B 336 336 . | 0.1006 | 0.0824 | 0.0728 | -0.0150 | -0.0119 |   |
| 0.0155 | 1   | .   |                             |        |        |        |         |         |   |
| 5898   | CB  | CB  | . CYS CYS CYS B B 336 336 . | 0.1096 | 0.0839 | 0.0978 | -0.0083 | 0.0009  |   |
| 0.0167 | 1   | .   |                             |        |        |        |         |         |   |
| 5899   | SG  | SG  | . CYS CYS CYS B B 336 336 . | 0.1407 | 0.1138 | 0.1229 | 0.0037  | 0.0010  |   |
| 0.0025 | 1   | .   |                             |        |        |        |         |         |   |
| 5900   | C   | C   | . CYS CYS CYS B B 336 336 . | 0.1073 | 0.0885 | 0.0863 | 0.0067  | -0.0227 |   |
| 0.0087 | 1   | .   |                             |        |        |        |         |         |   |
| 5901   | O   | O   | . CYS CYS CYS B B 336 336 . | 0.1553 | 0.1107 | 0.1363 | 0.0033  | -0.0376 |   |
| 0.0080 | 1   | .   |                             |        |        |        |         |         |   |
| 5902   | N   | N   | . ASN ASN ASN B B 337 337 . | 0.1020 | 0.0899 | 0.1033 | -0.0062 | 0.0032  |   |
| 0.0093 | 1   | .   |                             |        |        |        |         |         |   |

|        |     |     |                             |        |        |        |         |         |   |
|--------|-----|-----|-----------------------------|--------|--------|--------|---------|---------|---|
| 5903   | CA  | CA  | . ASN ASN ASN B B 337 337 . | 0.1156 | 0.0646 | 0.0846 | 0.0025  | 0.0012  | - |
| 0.0114 | 1   | .   |                             |        |        |        |         |         |   |
| 5904   | CB  | CB  | . ASN ASN ASN B B 337 337 . | 0.1083 | 0.0965 | 0.0861 | 0.0225  | 0.0039  | - |
| 0.0220 | 1   | .   |                             |        |        |        |         |         |   |
| 5905   | CG  | CG  | . ASN ASN ASN B B 337 337 . | 0.1237 | 0.0734 | 0.0852 | 0.0227  | 0.0019  | - |
| 0.0112 | 1   | .   |                             |        |        |        |         |         |   |
| 5906   | OD1 | OD1 | . ASN ASN ASN B B 337 337 . | 0.1277 | 0.1005 | 0.0908 | 0.0167  | -0.0046 | - |
| 0.0026 | 1   | .   |                             |        |        |        |         |         |   |
| 5907   | ND2 | ND2 | . ASN ASN ASN B B 337 337 . | 0.1516 | 0.1456 | 0.1265 | 0.0045  | 0.0234  | - |
| 0.0222 | 1   | .   |                             |        |        |        |         |         |   |
| 5908   | C   | C   | . ASN ASN ASN B B 337 337 . | 0.0997 | 0.1047 | 0.0935 | -0.0017 | -0.0027 | - |
| 0.0129 | 1   | .   |                             |        |        |        |         |         |   |
| 5909   | O   | O   | . ASN ASN ASN B B 337 337 . | 0.1435 | 0.1209 | 0.1259 | -0.0135 | 0.0018  |   |
| 0.0036 | 1   | .   |                             |        |        |        |         |         |   |
| 5910   | N   | N   | . CYS CYS CYS B B 338 338 . | 0.0997 | 0.1174 | 0.0881 | 0.0085  | 0.0080  | - |
| 0.0081 | 1   | .   |                             |        |        |        |         |         |   |
| 5911   | CA  | CA  | . CYS CYS CYS B B 338 338 . | 0.1150 | 0.0984 | 0.0884 | -0.0018 | 0.0018  |   |
| 0.0037 | 1   | .   |                             |        |        |        |         |         |   |
| 5912   | CB  | CB  | . CYS CYS CYS B B 338 338 . | 0.1316 | 0.0863 | 0.0756 | 0.0198  | -0.0244 |   |
| 0.0261 | 1   | .   |                             |        |        |        |         |         |   |
| 5913   | SG  | SG  | . CYS CYS CYS B B 338 338 . | 0.1310 | 0.1273 | 0.1297 | -0.0028 | -0.0148 |   |
| 0.0161 | 1   | .   |                             |        |        |        |         |         |   |
| 5914   | C   | C   | . CYS CYS CYS B B 338 338 . | 0.1177 | 0.0877 | 0.0947 | -0.0064 | -0.0009 |   |
| 0.0046 | 1   | .   |                             |        |        |        |         |         |   |
| 5915   | O   | O   | . CYS CYS CYS B B 338 338 . | 0.1183 | 0.0923 | 0.1018 | -0.0202 | 0.0020  |   |
| 0.0015 | 1   | .   |                             |        |        |        |         |         |   |
| 5916   | N   | N   | . LEU LEU LEU B B 339 339 . | 0.0905 | 0.0863 | 0.0702 | 0.0140  | -0.0021 |   |
| 0.0007 | 1   | .   |                             |        |        |        |         |         |   |
| 5917   | CA  | CA  | . LEU LEU LEU B B 339 339 . | 0.0925 | 0.0980 | 0.0818 | 0.0121  | 0.0091  |   |
| 0.0132 | 1   | .   |                             |        |        |        |         |         |   |
| 5918   | CB  | CB  | . LEU LEU LEU B B 339 339 . | 0.0917 | 0.1196 | 0.0812 | -0.0102 | -0.0032 | - |
| 0.0133 | 1   | .   |                             |        |        |        |         |         |   |
| 5919   | CG  | CG  | . LEU LEU LEU B B 339 339 . | 0.0914 | 0.0875 | 0.0961 | 0.0043  | -0.0063 | - |
| 0.0138 | 1   | .   |                             |        |        |        |         |         |   |
| 5920   | CD1 | CD1 | . LEU LEU LEU B B 339 339 . | 0.1425 | 0.0958 | 0.0944 | 0.0065  | -0.0160 | - |
| 0.0250 | 1   | .   |                             |        |        |        |         |         |   |
| 5921   | CD2 | CD2 | . LEU LEU LEU B B 339 339 . | 0.0951 | 0.1305 | 0.1318 | 0.0011  | 0.0157  | - |
| 0.0021 | 1   | .   |                             |        |        |        |         |         |   |
| 5922   | C   | C   | . LEU LEU LEU B B 339 339 . | 0.1225 | 0.1066 | 0.0736 | -0.0038 | 0.0124  | - |
| 0.0031 | 1   | .   |                             |        |        |        |         |         |   |
| 5923   | O   | O   | . LEU LEU LEU B B 339 339 . | 0.1241 | 0.1036 | 0.0831 | -0.0085 | -0.0122 | - |
| 0.0013 | 1   | .   |                             |        |        |        |         |         |   |
| 5924   | N   | N   | . LEU LEU LEU B B 340 340 . | 0.0941 | 0.0961 | 0.0679 | 0.0047  | -0.0143 |   |
| 0.0134 | 1   | .   |                             |        |        |        |         |         |   |
| 5925   | CA  | CA  | . LEU LEU LEU B B 340 340 . | 0.1015 | 0.0841 | 0.0799 | -0.0104 | -0.0032 |   |
| 0.0148 | 1   | .   |                             |        |        |        |         |         |   |
| 5926   | CB  | CB  | . LEU LEU LEU B B 340 340 . | 0.0824 | 0.0684 | 0.0797 | -0.0120 | -0.0331 |   |
| 0.0123 | 1   | .   |                             |        |        |        |         |         |   |
| 5927   | CG  | CG  | . LEU LEU LEU B B 340 340 . | 0.0966 | 0.0653 | 0.1045 | 0.0111  | -0.0248 | - |
| 0.0065 | 1   | .   |                             |        |        |        |         |         |   |
| 5928   | CD1 | CD1 | . LEU LEU LEU B B 340 340 . | 0.1117 | 0.0894 | 0.1089 | 0.0244  | -0.0075 |   |
| 0.0082 | 1   | .   |                             |        |        |        |         |         |   |
| 5929   | CD2 | CD2 | . LEU LEU LEU B B 340 340 . | 0.0852 | 0.0812 | 0.1367 | -0.0135 | 0.0006  | - |
| 0.0394 | 1   | .   |                             |        |        |        |         |         |   |
| 5930   | C   | C   | . LEU LEU LEU B B 340 340 . | 0.0975 | 0.0874 | 0.0859 | 0.0176  | -0.0015 |   |
| 0.0101 | 1   | .   |                             |        |        |        |         |         |   |
| 5931   | O   | O   | . LEU LEU LEU B B 340 340 . | 0.1180 | 0.0962 | 0.0974 | 0.0016  | -0.0004 |   |
| 0.0065 | 1   | .   |                             |        |        |        |         |         |   |
| 5932   | N   | N   | . LEU LEU LEU B B 341 341 . | 0.0742 | 0.0880 | 0.0806 | 0.0001  | 0.0056  |   |
| 0.0114 | 1   | .   |                             |        |        |        |         |         |   |

|        |     |     |                   |         |                                        |   |
|--------|-----|-----|-------------------|---------|----------------------------------------|---|
| 5933   | CA  | CA  | . LEU LEU LEU B B | 341 341 | . 0.0995 0.1006 0.0769 -0.0043 0.0073  | - |
| 0.0041 | 1   | .   |                   |         |                                        |   |
| 5934   | CB  | CB  | . LEU LEU LEU B B | 341 341 | . 0.0844 0.0745 0.1271 0.0077 0.0198   | - |
| 0.0103 | 1   | .   |                   |         |                                        |   |
| 5935   | CG  | CG  | . LEU LEU LEU B B | 341 341 | . 0.0952 0.1072 0.1289 0.0141 -0.0041  |   |
| 0.0298 | 1   | .   |                   |         |                                        |   |
| 5936   | CD1 | CD1 | . LEU LEU LEU B B | 341 341 | . 0.1633 0.1740 0.1618 0.0081 -0.0430  |   |
| 0.0366 | 1   | .   |                   |         |                                        |   |
| 5937   | CD2 | CD2 | . LEU LEU LEU B B | 341 341 | . 0.1438 0.1429 0.1852 -0.0230 0.0024  |   |
| 0.0181 | 1   | .   |                   |         |                                        |   |
| 5938   | C   | C   | . LEU LEU LEU B B | 341 341 | . 0.1167 0.0919 0.0749 0.0044 0.0028   |   |
| 0.0033 | 1   | .   |                   |         |                                        |   |
| 5939   | O   | O   | . LEU LEU LEU B B | 341 341 | . 0.1084 0.0990 0.0916 0.0242 0.0077   | - |
| 0.0035 | 1   | .   |                   |         |                                        |   |
| 5940   | N   | N   | . LYS LYS LYS B B | 342 342 | . 0.1077 0.0810 0.0734 0.0032 -0.0010  |   |
| 0.0038 | 1   | .   |                   |         |                                        |   |
| 5941   | CA  | CA  | . LYS LYS LYS B B | 342 342 | . 0.1162 0.1049 0.0874 -0.0080 0.0001  |   |
| 0.0095 | 1   | .   |                   |         |                                        |   |
| 5942   | CB  | CB  | . LYS LYS LYS B B | 342 342 | . 0.1135 0.1007 0.0866 0.0010 -0.0125  | - |
| 0.0185 | 1   | .   |                   |         |                                        |   |
| 5943   | CG  | CG  | . LYS LYS LYS B B | 342 342 | . 0.0974 0.1267 0.1048 0.0107 -0.0119  | - |
| 0.0040 | 1   | .   |                   |         |                                        |   |
| 5944   | CD  | CD  | . LYS LYS LYS B B | 342 342 | . 0.1027 0.1207 0.1291 -0.0084 0.0273  |   |
| 0.0075 | 1   | .   |                   |         |                                        |   |
| 5945   | CE  | CE  | . LYS LYS LYS B B | 342 342 | . 0.1349 0.1287 0.1445 0.0133 0.0090   |   |
| 0.0256 | 1   | .   |                   |         |                                        |   |
| 5946   | NZ  | NZ  | . LYS LYS LYS B B | 342 342 | . 0.1352 0.1642 0.1386 -0.0104 -0.0020 | - |
| 0.0261 | 1   | .   |                   |         |                                        |   |
| 5947   | C   | C   | . LYS LYS LYS B B | 342 342 | . 0.1255 0.0958 0.1002 0.0099 0.0072   |   |
| 0.0079 | 1   | .   |                   |         |                                        |   |
| 5948   | O   | O   | . LYS LYS LYS B B | 342 342 | . 0.1253 0.1109 0.0970 0.0263 0.0008   |   |
| 0.0050 | 1   | .   |                   |         |                                        |   |
| 5949   | N   | N   | . VAL VAL VAL B B | 343 343 | . 0.1187 0.1172 0.1085 -0.0002 -0.0038 |   |
| 0.0147 | 1   | .   |                   |         |                                        |   |
| 5950   | CA  | CA  | . VAL VAL VAL B B | 343 343 | . 0.1154 0.1074 0.1190 -0.0057 0.0002  |   |
| 0.0180 | 1   | .   |                   |         |                                        |   |
| 5951   | CB  | CB  | . VAL VAL VAL B B | 343 343 | . 0.1146 0.1216 0.1240 -0.0134 -0.0033 |   |
| 0.0255 | 1   | .   |                   |         |                                        |   |
| 5952   | CG1 | CG1 | . VAL VAL VAL B B | 343 343 | . 0.2012 0.1327 0.1499 0.0165 0.0018   | - |
| 0.0204 | 1   | .   |                   |         |                                        |   |
| 5953   | CG2 | CG2 | . VAL VAL VAL B B | 343 343 | . 0.1406 0.1273 0.1177 -0.0012 -0.0132 |   |
| 0.0235 | 1   | .   |                   |         |                                        |   |
| 5954   | C   | C   | . VAL VAL VAL B B | 343 343 | . 0.1103 0.1120 0.1146 0.0117 0.0028   |   |
| 0.0056 | 1   | .   |                   |         |                                        |   |
| 5955   | O   | O   | . VAL VAL VAL B B | 343 343 | . 0.1003 0.1136 0.1200 0.0150 -0.0023  | - |
| 0.0115 | 1   | .   |                   |         |                                        |   |
| 5956   | N   | N   | . ASN ASN ASN B B | 344 344 | . 0.1112 0.0997 0.1047 0.0100 0.0001   |   |
| 0.0012 | 1   | .   |                   |         |                                        |   |
| 5957   | CA  | CA  | . ASN ASN ASN B B | 344 344 | . 0.1187 0.0937 0.0918 0.0178 -0.0178  |   |
| 0.0076 | 1   | .   |                   |         |                                        |   |
| 5958   | CB  | CB  | . ASN ASN ASN B B | 344 344 | . 0.0989 0.1227 0.0922 0.0029 -0.0166  |   |
| 0.0085 | 1   | .   |                   |         |                                        |   |
| 5959   | CG  | CG  | . ASN ASN ASN B B | 344 344 | . 0.1127 0.0658 0.0729 0.0019 0.0041   |   |
| 0.0219 | 1   | .   |                   |         |                                        |   |
| 5960   | OD1 | OD1 | . ASN ASN ASN B B | 344 344 | . 0.1000 0.0936 0.1135 0.0183 0.0164   | - |
| 0.0135 | 1   | .   |                   |         |                                        |   |
| 5961   | ND2 | ND2 | . ASN ASN ASN B B | 344 344 | . 0.1334 0.1093 0.1221 -0.0010 -0.0416 |   |
| 0.0086 | 1   | .   |                   |         |                                        |   |
| 5962   | C   | C   | . ASN ASN ASN B B | 344 344 | . 0.0935 0.0918 0.0979 0.0035 0.0052   | - |
| 0.0050 | 1   | .   |                   |         |                                        |   |

|        |     |     |                             |        |        |        |         |         |   |
|--------|-----|-----|-----------------------------|--------|--------|--------|---------|---------|---|
| 5963   | O   | O   | . ASN ASN ASN B B 344 344 . | 0.1332 | 0.0932 | 0.0978 | 0.0126  | 0.0101  | - |
| 0.0003 | 1   | .   |                             |        |        |        |         |         |   |
| 5964   | N   | N   | . GLN GLN GLN B B 345 345 . | 0.0950 | 0.0832 | 0.0841 | 0.0128  | 0.0066  |   |
| 0.0238 | 1   | .   |                             |        |        |        |         |         |   |
| 5965   | CA  | CA  | . GLN GLN GLN B B 345 345 . | 0.1032 | 0.0770 | 0.1008 | 0.0185  | 0.0308  |   |
| 0.0251 | 1   | .   |                             |        |        |        |         |         |   |
| 5966   | CB  | CB  | . GLN GLN GLN B B 345 345 . | 0.0755 | 0.1022 | 0.0866 | 0.0070  | 0.0300  |   |
| 0.0006 | 1   | .   |                             |        |        |        |         |         |   |
| 5967   | CG  | CG  | . GLN GLN GLN B B 345 345 . | 0.0883 | 0.0795 | 0.0779 | 0.0008  | 0.0038  |   |
| 0.0184 | 1   | .   |                             |        |        |        |         |         |   |
| 5968   | CD  | CD  | . GLN GLN GLN B B 345 345 . | 0.1043 | 0.1087 | 0.1001 | 0.0139  | -0.0074 | - |
| 0.0036 | 1   | .   |                             |        |        |        |         |         |   |
| 5969   | OE1 | OE1 | . GLN GLN GLN B B 345 345 . | 0.1513 | 0.1308 | 0.1366 | -0.0013 | 0.0020  | - |
| 0.0023 | 1   | .   |                             |        |        |        |         |         |   |
| 5970   | NE2 | NE2 | . GLN GLN GLN B B 345 345 . | 0.0652 | 0.0552 | 0.0673 | 0.0239  | -0.0084 |   |
| 0.0097 | 1   | .   |                             |        |        |        |         |         |   |
| 5971   | C   | C   | . GLN GLN GLN B B 345 345 . | 0.0929 | 0.0789 | 0.0933 | -0.0072 | 0.0062  | - |
| 0.0005 | 1   | .   |                             |        |        |        |         |         |   |
| 5972   | O   | O   | . GLN GLN GLN B B 345 345 . | 0.1235 | 0.1033 | 0.1053 | 0.0044  | -0.0099 |   |
| 0.0054 | 1   | .   |                             |        |        |        |         |         |   |
| 5973   | N   | N   | . ILE ILE ILE B B 346 346 . | 0.0740 | 0.1022 | 0.1110 | 0.0108  | 0.0060  | - |
| 0.0015 | 1   | .   |                             |        |        |        |         |         |   |
| 5974   | CA  | CA  | . ILE ILE ILE B B 346 346 . | 0.1045 | 0.1124 | 0.1118 | 0.0240  | -0.0018 |   |
| 0.0040 | 1   | .   |                             |        |        |        |         |         |   |
| 5975   | CB  | CB  | . ILE ILE ILE B B 346 346 . | 0.1400 | 0.1144 | 0.1157 | 0.0150  | -0.0394 |   |
| 0.0041 | 1   | .   |                             |        |        |        |         |         |   |
| 5976   | CG1 | CG1 | . ILE ILE ILE B B 346 346 . | 0.1034 | 0.1342 | 0.1211 | 0.0256  | -0.0186 |   |
| 0.0291 | 1   | .   |                             |        |        |        |         |         |   |
| 5977   | CD  | CD  | . ILE ILE ILE B B 346 346 . | 0.1329 | 0.1356 | 0.1583 | -0.0059 | 0.0053  |   |
| 0.0026 | 1   | .   |                             |        |        |        |         |         |   |
| 5978   | CG2 | CG2 | . ILE ILE ILE B B 346 346 . | 0.1011 | 0.0833 | 0.1192 | 0.0187  | 0.0041  | - |
| 0.0149 | 1   | .   |                             |        |        |        |         |         |   |
| 5979   | C   | C   | . ILE ILE ILE B B 346 346 . | 0.0860 | 0.0837 | 0.0969 | 0.0147  | 0.0010  |   |
| 0.0075 | 1   | .   |                             |        |        |        |         |         |   |
| 5980   | O   | O   | . ILE ILE ILE B B 346 346 . | 0.1270 | 0.1136 | 0.1138 | 0.0247  | 0.0072  |   |
| 0.0118 | 1   | .   |                             |        |        |        |         |         |   |
| 5981   | N   | N   | . GLY GLY GLY B B 347 347 . | 0.1140 | 0.1218 | 0.1087 | 0.0134  | 0.0144  |   |
| 0.0151 | 1   | .   |                             |        |        |        |         |         |   |
| 5982   | CA  | CA  | . GLY GLY GLY B B 347 347 . | 0.1119 | 0.1325 | 0.1115 | 0.0130  | 0.0187  | - |
| 0.0031 | 1   | .   |                             |        |        |        |         |         |   |
| 5983   | C   | C   | . GLY GLY GLY B B 347 347 . | 0.1174 | 0.1017 | 0.0995 | -0.0002 | 0.0114  | - |
| 0.0017 | 1   | .   |                             |        |        |        |         |         |   |
| 5984   | O   | O   | . GLY GLY GLY B B 347 347 . | 0.1070 | 0.1339 | 0.1246 | 0.0104  | 0.0148  | - |
| 0.0112 | 1   | .   |                             |        |        |        |         |         |   |
| 5985   | N   | N   | . SER SER SER B B 348 348 . | 0.0891 | 0.1005 | 0.1090 | -0.0007 | 0.0108  |   |
| 0.0004 | 1   | .   |                             |        |        |        |         |         |   |
| 5986   | CA  | CA  | . SER SER SER B B 348 348 . | 0.1083 | 0.1038 | 0.1299 | -0.0015 | 0.0024  |   |
| 0.0015 | 1   | .   |                             |        |        |        |         |         |   |
| 5987   | CB  | CB  | . SER SER SER B B 348 348 . | 0.1011 | 0.1362 | 0.1131 | 0.0157  | -0.0058 |   |
| 0.0113 | 1   | .   |                             |        |        |        |         |         |   |
| 5988   | OG  | OG  | . SER SER SER B B 348 348 . | 0.1244 | 0.1319 | 0.1424 | 0.0139  | -0.0204 |   |
| 0.0149 | 1   | .   |                             |        |        |        |         |         |   |
| 5989   | C   | C   | . SER SER SER B B 348 348 . | 0.1085 | 0.0983 | 0.1051 | 0.0094  | 0.0024  |   |
| 0.0072 | 1   | .   |                             |        |        |        |         |         |   |
| 5990   | O   | O   | . SER SER SER B B 348 348 . | 0.1074 | 0.1166 | 0.1135 | 0.0094  | 0.0004  |   |
| 0.0168 | 1   | .   |                             |        |        |        |         |         |   |
| 5991   | N   | N   | . VAL VAL VAL B B 349 349 . | 0.1304 | 0.1028 | 0.1127 | 0.0050  | -0.0112 |   |
| 0.0106 | 1   | .   |                             |        |        |        |         |         |   |
| 5992   | CA  | CA  | . VAL VAL VAL B B 349 349 . | 0.1316 | 0.1125 | 0.1121 | 0.0061  | -0.0008 | - |
| 0.0006 | 1   | .   |                             |        |        |        |         |         |   |

|        |     |     |                   |         |                                          |
|--------|-----|-----|-------------------|---------|------------------------------------------|
| 5993   | CB  | CB  | . VAL VAL VAL B B | 349 349 | . 0.1244 0.1140 0.1194 0.0073 -0.0064    |
| 0.0184 | 1   | .   |                   |         |                                          |
| 5994   | CG1 | CG1 | . VAL VAL VAL B B | 349 349 | . 0.1526 0.1578 0.1859 -0.0047 -0.0204 - |
| 0.0163 | 1   | .   |                   |         |                                          |
| 5995   | CG2 | CG2 | . VAL VAL VAL B B | 349 349 | . 0.1792 0.1182 0.1064 0.0096 0.0045     |
| 0.0084 | 1   | .   |                   |         |                                          |
| 5996   | C   | C   | . VAL VAL VAL B B | 349 349 | . 0.1016 0.1298 0.1203 0.0080 0.0024     |
| 0.0115 | 1   | .   |                   |         |                                          |
| 5997   | O   | O   | . VAL VAL VAL B B | 349 349 | . 0.1243 0.1372 0.1237 0.0281 -0.0160    |
| 0.0113 | 1   | .   |                   |         |                                          |
| 5998   | N   | N   | . THR THR THR B B | 350 350 | . 0.1156 0.1208 0.1365 0.0145 -0.0042    |
| 0.0002 | 1   | .   |                   |         |                                          |
| 5999   | CA  | CA  | . THR THR THR B B | 350 350 | . 0.1189 0.1429 0.1327 0.0100 0.0086     |
| 0.0110 | 1   | .   |                   |         |                                          |
| 6000   | CB  | CB  | . THR THR THR B B | 350 350 | . 0.1125 0.1379 0.1414 0.0159 0.0023     |
| 0.0248 | 1   | .   |                   |         |                                          |
| 6001   | OG1 | OG1 | . THR THR THR B B | 350 350 | . 0.1112 0.1681 0.1532 0.0027 0.0023     |
| 0.0213 | 1   | .   |                   |         |                                          |
| 6002   | CG2 | CG2 | . THR THR THR B B | 350 350 | . 0.1713 0.1830 0.1740 0.0320 -0.0017    |
| 0.0374 | 1   | .   |                   |         |                                          |
| 6003   | C   | C   | . THR THR THR B B | 350 350 | . 0.1242 0.1168 0.1247 0.0077 -0.0063    |
| 0.0063 | 1   | .   |                   |         |                                          |
| 6004   | O   | O   | . THR THR THR B B | 350 350 | . 0.1250 0.1382 0.1284 0.0108 0.0177     |
| 0.0112 | 1   | .   |                   |         |                                          |
| 6005   | N   | N   | . GLU GLU GLU B B | 351 351 | . 0.1014 0.1170 0.1274 -0.0079 -0.0121   |
| 0.0109 | 1   | .   |                   |         |                                          |
| 6006   | CA  | CA  | . GLU GLU GLU B B | 351 351 | . 0.1101 0.1190 0.1211 0.0059 -0.0127    |
| 0.0037 | 1   | .   |                   |         |                                          |
| 6007   | CB  | CB  | . GLU GLU GLU B B | 351 351 | . 0.1047 0.1107 0.1415 0.0046 0.0061 -   |
| 0.0070 | 1   | .   |                   |         |                                          |
| 6008   | CG  | CG  | . GLU GLU GLU B B | 351 351 | . 0.1265 0.1235 0.1485 0.0033 0.0322     |
| 0.0032 | 1   | .   |                   |         |                                          |
| 6009   | CD  | CD  | . GLU GLU GLU B B | 351 351 | . 0.1212 0.1480 0.1341 0.0055 -0.0091    |
| 0.0060 | 1   | .   |                   |         |                                          |
| 6010   | OE1 | OE1 | . GLU GLU GLU B B | 351 351 | . 0.1535 0.1447 0.1369 0.0150 -0.0026 -  |
| 0.0079 | 1   | .   |                   |         |                                          |
| 6011   | OE2 | OE2 | . GLU GLU GLU B B | 351 351 | . 0.1810 0.1656 0.2090 0.0111 0.0050     |
| 0.0455 | 1   | .   |                   |         |                                          |
| 6012   | C   | C   | . GLU GLU GLU B B | 351 351 | . 0.1293 0.1332 0.1324 0.0000 0.0048     |
| 0.0156 | 1   | .   |                   |         |                                          |
| 6013   | O   | O   | . GLU GLU GLU B B | 351 351 | . 0.1272 0.1354 0.1090 0.0041 -0.0083 -  |
| 0.0053 | 1   | .   |                   |         |                                          |
| 6014   | N   | N   | . ALA ALA ALA B B | 352 352 | . 0.1040 0.1337 0.1310 0.0039 -0.0124    |
| 0.0069 | 1   | .   |                   |         |                                          |
| 6015   | CA  | CA  | . ALA ALA ALA B B | 352 352 | . 0.1116 0.1108 0.1127 0.0216 -0.0107    |
| 0.0050 | 1   | .   |                   |         |                                          |
| 6016   | CB  | CB  | . ALA ALA ALA B B | 352 352 | . 0.1352 0.1167 0.1002 0.0175 -0.0037 -  |
| 0.0112 | 1   | .   |                   |         |                                          |
| 6017   | C   | C   | . ALA ALA ALA B B | 352 352 | . 0.1144 0.1036 0.1268 0.0131 0.0000     |
| 0.0129 | 1   | .   |                   |         |                                          |
| 6018   | O   | O   | . ALA ALA ALA B B | 352 352 | . 0.1176 0.1410 0.1065 0.0122 -0.0074    |
| 0.0037 | 1   | .   |                   |         |                                          |
| 6019   | N   | N   | . ILE ILE ILE B B | 353 353 | . 0.1171 0.1391 0.1302 -0.0168 -0.0012 - |
| 0.0005 | 1   | .   |                   |         |                                          |
| 6020   | CA  | CA  | . ILE ILE ILE B B | 353 353 | . 0.1165 0.1210 0.1041 -0.0113 0.0020    |
| 0.0101 | 1   | .   |                   |         |                                          |
| 6021   | CB  | CB  | . ILE ILE ILE B B | 353 353 | . 0.1136 0.1465 0.1294 -0.0130 -0.0011   |
| 0.0020 | 1   | .   |                   |         |                                          |
| 6022   | CG1 | CG1 | . ILE ILE ILE B B | 353 353 | . 0.1431 0.1485 0.1645 -0.0432 -0.0163   |
| 0.0113 | 1   | .   |                   |         |                                          |



|        |     |     |                             |        |        |        |         |         |   |
|--------|-----|-----|-----------------------------|--------|--------|--------|---------|---------|---|
| 6023   | CD  | CD  | . ILE ILE ILE B B 353 353 . | 0.1861 | 0.1714 | 0.1862 | -0.0838 | 0.0054  |   |
| 0.0040 | 1   | .   |                             |        |        |        |         |         |   |
| 6024   | CG2 | CG2 | . ILE ILE ILE B B 353 353 . | 0.1316 | 0.1580 | 0.1833 | -0.0389 | -0.0088 | - |
| 0.0272 | 1   | .   |                             |        |        |        |         |         |   |
| 6025   | C   | C   | . ILE ILE ILE B B 353 353 . | 0.1242 | 0.1149 | 0.1257 | 0.0078  | 0.0021  |   |
| 0.0158 | 1   | .   |                             |        |        |        |         |         |   |
| 6026   | O   | O   | . ILE ILE ILE B B 353 353 . | 0.1285 | 0.1327 | 0.1201 | 0.0173  | -0.0218 |   |
| 0.0004 | 1   | .   |                             |        |        |        |         |         |   |
| 6027   | N   | N   | . GLN GLN GLN B B 354 354 . | 0.1012 | 0.1209 | 0.1283 | -0.0079 | 0.0049  |   |
| 0.0011 | 1   | .   |                             |        |        |        |         |         |   |
| 6028   | CA  | CA  | . GLN GLN GLN B B 354 354 . | 0.1340 | 0.1270 | 0.1191 | 0.0007  | -0.0013 |   |
| 0.0033 | 1   | .   |                             |        |        |        |         |         |   |
| 6029   | CB  | CB  | . GLN GLN GLN B B 354 354 . | 0.1371 | 0.1290 | 0.1670 | 0.0257  | -0.0083 |   |
| 0.0337 | 1   | .   |                             |        |        |        |         |         |   |
| 6030   | CG  | CG  | . GLN GLN GLN B B 354 354 . | 0.2547 | 0.2469 | 0.2497 | 0.0489  | 0.0127  |   |
| 0.0398 | 1   | .   |                             |        |        |        |         |         |   |
| 6031   | CD  | CD  | . GLN GLN GLN B B 354 354 . | 0.3361 | 0.2981 | 0.3624 | 0.0780  | -0.0093 |   |
| 0.0186 | 1   | .   |                             |        |        |        |         |         |   |
| 6032   | OE1 | OE1 | . GLN GLN GLN B B 354 354 . | 0.3680 | 0.4618 | 0.4283 | 0.1650  | -0.0146 | - |
| 0.0352 | 1   | .   |                             |        |        |        |         |         |   |
| 6033   | NE2 | NE2 | . GLN GLN GLN B B 354 354 . | 0.3385 | 0.3436 | 0.3240 | 0.0223  | -0.0228 |   |
| 0.0423 | 1   | .   |                             |        |        |        |         |         |   |
| 6034   | C   | C   | . GLN GLN GLN B B 354 354 . | 0.1516 | 0.1476 | 0.1493 | -0.0002 | -0.0169 |   |
| 0.0089 | 1   | .   |                             |        |        |        |         |         |   |
| 6035   | O   | O   | . GLN GLN GLN B B 354 354 . | 0.1199 | 0.1560 | 0.1385 | -0.0012 | -0.0128 |   |
| 0.0151 | 1   | .   |                             |        |        |        |         |         |   |
| 6036   | N   | N   | . ALA ALA ALA B B 355 355 . | 0.1223 | 0.1252 | 0.1350 | 0.0158  | -0.0184 |   |
| 0.0072 | 1   | .   |                             |        |        |        |         |         |   |
| 6037   | CA  | CA  | . ALA ALA ALA B B 355 355 . | 0.1260 | 0.1104 | 0.1323 | 0.0097  | -0.0028 | - |
| 0.0014 | 1   | .   |                             |        |        |        |         |         |   |
| 6038   | CB  | CB  | . ALA ALA ALA B B 355 355 . | 0.1073 | 0.1115 | 0.1017 | 0.0334  | -0.0223 | - |
| 0.0093 | 1   | .   |                             |        |        |        |         |         |   |
| 6039   | C   | C   | . ALA ALA ALA B B 355 355 . | 0.1042 | 0.1243 | 0.1054 | 0.0058  | 0.0249  |   |
| 0.0132 | 1   | .   |                             |        |        |        |         |         |   |
| 6040   | O   | O   | . ALA ALA ALA B B 355 355 . | 0.1163 | 0.1283 | 0.0953 | -0.0037 | -0.0151 |   |
| 0.0092 | 1   | .   |                             |        |        |        |         |         |   |
| 6041   | N   | N   | . CYS CYS CYS B B 356 356 . | 0.1113 | 0.1054 | 0.1254 | -0.0012 | -0.0095 |   |
| 0.0062 | 1   | .   |                             |        |        |        |         |         |   |
| 6042   | CA  | CA  | . CYS CYS CYS B B 356 356 . | 0.1159 | 0.1157 | 0.1030 | 0.0034  | 0.0000  |   |
| 0.0141 | 1   | .   |                             |        |        |        |         |         |   |
| 6043   | CB  | CB  | . CYS CYS CYS B B 356 356 . | 0.1223 | 0.1245 | 0.1417 | 0.0022  | 0.0240  |   |
| 0.0095 | 1   | .   |                             |        |        |        |         |         |   |
| 6044   | SG  | SG  | . CYS CYS CYS B B 356 356 . | 0.1584 | 0.1325 | 0.1342 | 0.0000  | -0.0071 |   |
| 0.0154 | 1   | .   |                             |        |        |        |         |         |   |
| 6045   | C   | C   | . CYS CYS CYS B B 356 356 . | 0.1402 | 0.1244 | 0.1397 | 0.0161  | 0.0021  | - |
| 0.0030 | 1   | .   |                             |        |        |        |         |         |   |
| 6046   | O   | O   | . CYS CYS CYS B B 356 356 . | 0.1494 | 0.1224 | 0.1187 | 0.0222  | -0.0044 |   |
| 0.0183 | 1   | .   |                             |        |        |        |         |         |   |
| 6047   | N   | N   | . LYS LYS LYS B B 357 357 . | 0.1219 | 0.1222 | 0.1193 | -0.0040 | -0.0320 | - |
| 0.0018 | 1   | .   |                             |        |        |        |         |         |   |
| 6048   | CA  | CA  | . LYS LYS LYS B B 357 357 . | 0.1422 | 0.1754 | 0.1374 | -0.0009 | -0.0174 | - |
| 0.0067 | 1   | .   |                             |        |        |        |         |         |   |
| 6049   | CB  | CB  | . LYS LYS LYS B B 357 357 . | 0.1336 | 0.1752 | 0.1346 | -0.0178 | -0.0166 |   |
| 0.0160 | 1   | .   |                             |        |        |        |         |         |   |
| 6050   | CG  | CG  | . LYS LYS LYS B B 357 357 . | 0.1733 | 0.1952 | 0.2217 | -0.0465 | -0.0164 |   |
| 0.0402 | 1   | .   |                             |        |        |        |         |         |   |
| 6051   | CD  | CD  | . LYS LYS LYS B B 357 357 . | 0.2279 | 0.2896 | 0.2738 | -0.0580 | -0.0254 |   |
| 0.0250 | 1   | .   |                             |        |        |        |         |         |   |
| 6052   | CE  | CE  | . LYS LYS LYS B B 357 357 . | 0.2825 | 0.4159 | 0.3329 | -0.0718 | -0.1055 |   |
| 0.0651 | 1   | .   |                             |        |        |        |         |         |   |

|        |     |     |                             |        |        |        |         |         |   |
|--------|-----|-----|-----------------------------|--------|--------|--------|---------|---------|---|
| 6053   | NZ  | NZ  | . LYS LYS LYS B B 357 357 . | 0.3120 | 0.4319 | 0.3663 | -0.0846 | -0.0830 |   |
| 0.0755 | 1   | .   |                             |        |        |        |         |         |   |
| 6054   | C   | C   | . LYS LYS LYS B B 357 357 . | 0.1427 | 0.1191 | 0.1250 | 0.0215  | -0.0259 | - |
| 0.0023 | 1   | .   |                             |        |        |        |         |         |   |
| 6055   | O   | O   | . LYS LYS LYS B B 357 357 . | 0.1751 | 0.1761 | 0.1307 | -0.0059 | -0.0246 |   |
| 0.0103 | 1   | .   |                             |        |        |        |         |         |   |
| 6056   | N   | N   | . LEU LEU LEU B B 358 358 . | 0.1130 | 0.1354 | 0.1482 | 0.0126  | -0.0172 |   |
| 0.0128 | 1   | .   |                             |        |        |        |         |         |   |
| 6057   | CA  | CA  | . LEU LEU LEU B B 358 358 . | 0.1644 | 0.1369 | 0.1340 | 0.0083  | -0.0117 |   |
| 0.0121 | 1   | .   |                             |        |        |        |         |         |   |
| 6058   | CB  | CB  | . LEU LEU LEU B B 358 358 . | 0.1585 | 0.1483 | 0.1567 | -0.0067 | -0.0185 |   |
| 0.0174 | 1   | .   |                             |        |        |        |         |         |   |
| 6059   | CG  | CG  | . LEU LEU LEU B B 358 358 . | 0.1517 | 0.1620 | 0.1601 | 0.0119  | -0.0376 |   |
| 0.0220 | 1   | .   |                             |        |        |        |         |         |   |
| 6060   | CD1 | CD1 | . LEU LEU LEU B B 358 358 . | 0.2425 | 0.2044 | 0.2100 | 0.0018  | -0.1274 | - |
| 0.0058 | 1   | .   |                             |        |        |        |         |         |   |
| 6061   | CD2 | CD2 | . LEU LEU LEU B B 358 358 . | 0.2184 | 0.1602 | 0.2005 | -0.0033 | -0.0131 | - |
| 0.0296 | 1   | .   |                             |        |        |        |         |         |   |
| 6062   | C   | C   | . LEU LEU LEU B B 358 358 . | 0.1638 | 0.1528 | 0.1380 | 0.0060  | -0.0197 |   |
| 0.0101 | 1   | .   |                             |        |        |        |         |         |   |
| 6063   | O   | O   | . LEU LEU LEU B B 358 358 . | 0.1643 | 0.1820 | 0.1155 | 0.0103  | -0.0253 |   |
| 0.0043 | 1   | .   |                             |        |        |        |         |         |   |
| 6064   | N   | N   | . ALA ALA ALA B B 359 359 . | 0.1152 | 0.1288 | 0.1277 | 0.0143  | -0.0198 |   |
| 0.0003 | 1   | .   |                             |        |        |        |         |         |   |
| 6065   | CA  | CA  | . ALA ALA ALA B B 359 359 . | 0.1301 | 0.1400 | 0.1246 | 0.0113  | -0.0260 |   |
| 0.0020 | 1   | .   |                             |        |        |        |         |         |   |
| 6066   | CB  | CB  | . ALA ALA ALA B B 359 359 . | 0.1252 | 0.1532 | 0.0995 | 0.0238  | -0.0298 |   |
| 0.0015 | 1   | .   |                             |        |        |        |         |         |   |
| 6067   | C   | C   | . ALA ALA ALA B B 359 359 . | 0.1485 | 0.1189 | 0.1160 | -0.0008 | 0.0063  | - |
| 0.0025 | 1   | .   |                             |        |        |        |         |         |   |
| 6068   | O   | O   | . ALA ALA ALA B B 359 359 . | 0.1550 | 0.1655 | 0.1106 | 0.0095  | -0.0200 |   |
| 0.0027 | 1   | .   |                             |        |        |        |         |         |   |
| 6069   | N   | N   | . GLN GLN GLN B B 360 360 . | 0.1487 | 0.1270 | 0.1210 | 0.0007  | -0.0064 |   |
| 0.0072 | 1   | .   |                             |        |        |        |         |         |   |
| 6070   | CA  | CA  | . GLN GLN GLN B B 360 360 . | 0.1471 | 0.1397 | 0.1384 | 0.0042  | -0.0070 |   |
| 0.0011 | 1   | .   |                             |        |        |        |         |         |   |
| 6071   | CB  | CB  | . GLN GLN GLN B B 360 360 . | 0.1579 | 0.1206 | 0.1420 | -0.0120 | -0.0274 | - |
| 0.0021 | 1   | .   |                             |        |        |        |         |         |   |
| 6072   | CG  | CG  | . GLN GLN GLN B B 360 360 . | 0.1938 | 0.1562 | 0.1670 | -0.0086 | -0.0383 |   |
| 0.0104 | 1   | .   |                             |        |        |        |         |         |   |
| 6073   | CD  | CD  | . GLN GLN GLN B B 360 360 . | 0.1768 | 0.1533 | 0.1596 | 0.0064  | -0.0078 | - |
| 0.0024 | 1   | .   |                             |        |        |        |         |         |   |
| 6074   | OE1 | OE1 | . GLN GLN GLN B B 360 360 . | 0.2035 | 0.1750 | 0.1670 | -0.0010 | 0.0060  |   |
| 0.0169 | 1   | .   |                             |        |        |        |         |         |   |
| 6075   | NE2 | NE2 | . GLN GLN GLN B B 360 360 . | 0.1958 | 0.1590 | 0.1848 | 0.0111  | -0.0340 | - |
| 0.0247 | 1   | .   |                             |        |        |        |         |         |   |
| 6076   | C   | C   | . GLN GLN GLN B B 360 360 . | 0.1586 | 0.1480 | 0.1379 | -0.0065 | -0.0065 | - |
| 0.0067 | 1   | .   |                             |        |        |        |         |         |   |
| 6077   | O   | O   | . GLN GLN GLN B B 360 360 . | 0.1791 | 0.1686 | 0.1317 | 0.0000  | -0.0261 | - |
| 0.0266 | 1   | .   |                             |        |        |        |         |         |   |
| 6078   | N   | N   | . GLU GLU GLU B B 361 361 . | 0.1383 | 0.1566 | 0.1249 | -0.0192 | -0.0190 | - |
| 0.0014 | 1   | .   |                             |        |        |        |         |         |   |
| 6079   | CA  | CA  | . GLU GLU GLU B B 361 361 . | 0.1673 | 0.1943 | 0.1359 | -0.0209 | -0.0242 |   |
| 0.0003 | 1   | .   |                             |        |        |        |         |         |   |
| 6080   | CB  | CB  | . GLU GLU GLU B B 361 361 . | 0.1368 | 0.2943 | 0.1624 | -0.0158 | -0.0249 |   |
| 0.0176 | 1   | .   |                             |        |        |        |         |         |   |
| 6081   | CG  | CG  | . GLU GLU GLU B B 361 361 . | 0.2834 | 0.3495 | 0.3333 | -0.0200 | -0.0247 |   |
| 0.0385 | 1   | .   |                             |        |        |        |         |         |   |
| 6082   | CD  | CD  | . GLU GLU GLU B B 361 361 . | 0.3974 | 0.4948 | 0.4880 | 0.0174  | 0.0050  |   |
| 0.0263 | 1   | .   |                             |        |        |        |         |         |   |

|        |     |     |                             |        |        |        |         |         |   |
|--------|-----|-----|-----------------------------|--------|--------|--------|---------|---------|---|
| 6083   | OE1 | OE1 | . GLU GLU GLU B B 361 361 . | 0.3571 | 0.5142 | 0.6017 | 0.1068  | -0.0734 |   |
| 0.0850 | 1   | .   |                             |        |        |        |         |         |   |
| 6084   | OE2 | OE2 | . GLU GLU GLU B B 361 361 . | 0.4243 | 0.5903 | 0.4944 | -0.0290 | -0.0212 |   |
| 0.0684 | 1   | .   |                             |        |        |        |         |         |   |
| 6085   | C   | C   | . GLU GLU GLU B B 361 361 . | 0.1923 | 0.1757 | 0.1504 | -0.0378 | -0.0402 |   |
| 0.0136 | 1   | .   |                             |        |        |        |         |         |   |
| 6086   | O   | O   | . GLU GLU GLU B B 361 361 . | 0.2088 | 0.2384 | 0.1529 | -0.0263 | -0.0577 |   |
| 0.0002 | 1   | .   |                             |        |        |        |         |         |   |
| 6087   | N   | N   | . ASN ASN ASN B B 362 362 . | 0.1516 | 0.1695 | 0.1439 | -0.0202 | -0.0238 |   |
| 0.0075 | 1   | .   |                             |        |        |        |         |         |   |
| 6088   | CA  | CA  | . ASN ASN ASN B B 362 362 . | 0.1777 | 0.1576 | 0.1443 | -0.0104 | -0.0250 |   |
| 0.0116 | 1   | .   |                             |        |        |        |         |         |   |
| 6089   | CB  | CB  | . ASN ASN ASN B B 362 362 . | 0.1436 | 0.1494 | 0.1351 | -0.0225 | -0.0268 |   |
| 0.0113 | 1   | .   |                             |        |        |        |         |         |   |
| 6090   | CG  | CG  | . ASN ASN ASN B B 362 362 . | 0.1891 | 0.1454 | 0.1644 | -0.0109 | -0.0327 |   |
| 0.0075 | 1   | .   |                             |        |        |        |         |         |   |
| 6091   | OD1 | OD1 | . ASN ASN ASN B B 362 362 . | 0.2933 | 0.2318 | 0.1378 | -0.0127 | -0.0465 |   |
| 0.0600 | 1   | .   |                             |        |        |        |         |         |   |
| 6092   | ND2 | ND2 | . ASN ASN ASN B B 362 362 . | 0.2979 | 0.2182 | 0.1811 | -0.0031 | -0.0179 |   |
| 0.0313 | 1   | .   |                             |        |        |        |         |         |   |
| 6093   | C   | C   | . ASN ASN ASN B B 362 362 . | 0.1922 | 0.1922 | 0.1389 | -0.0108 | -0.0363 |   |
| 0.0080 | 1   | .   |                             |        |        |        |         |         |   |
| 6094   | O   | O   | . ASN ASN ASN B B 362 362 . | 0.2338 | 0.2485 | 0.1966 | -0.0349 | -0.0175 |   |
| 0.0230 | 1   | .   |                             |        |        |        |         |         |   |
| 6095   | N   | N   | . GLY GLY GLY B B 363 363 . | 0.1967 | 0.1750 | 0.1306 | -0.0121 | -0.0521 | - |
| 0.0048 | 1   | .   |                             |        |        |        |         |         |   |
| 6096   | CA  | CA  | . GLY GLY GLY B B 363 363 . | 0.2088 | 0.2281 | 0.1772 | 0.0001  | -0.0424 | - |
| 0.0070 | 1   | .   |                             |        |        |        |         |         |   |
| 6097   | C   | C   | . GLY GLY GLY B B 363 363 . | 0.1746 | 0.2016 | 0.1569 | 0.0137  | -0.0344 | - |
| 0.0257 | 1   | .   |                             |        |        |        |         |         |   |
| 6098   | O   | O   | . GLY GLY GLY B B 363 363 . | 0.1734 | 0.2745 | 0.1599 | 0.0015  | -0.0277 | - |
| 0.0401 | 1   | .   |                             |        |        |        |         |         |   |
| 6099   | N   | N   | . TRP TRP TRP B B 364 364 . | 0.1657 | 0.1369 | 0.1402 | -0.0150 | -0.0152 | - |
| 0.0074 | 1   | .   |                             |        |        |        |         |         |   |
| 6100   | CA  | CA  | . TRP TRP TRP B B 364 364 . | 0.1331 | 0.1207 | 0.1046 | 0.0111  | -0.0190 | - |
| 0.0042 | 1   | .   |                             |        |        |        |         |         |   |
| 6101   | CB  | CB  | . TRP TRP TRP B B 364 364 . | 0.1450 | 0.1035 | 0.1243 | 0.0048  | -0.0332 | - |
| 0.0076 | 1   | .   |                             |        |        |        |         |         |   |
| 6102   | CG  | CG  | . TRP TRP TRP B B 364 364 . | 0.1429 | 0.1329 | 0.1034 | -0.0176 | -0.0126 | - |
| 0.0029 | 1   | .   |                             |        |        |        |         |         |   |
| 6103   | CD1 | CD1 | . TRP TRP TRP B B 364 364 . | 0.1536 | 0.1562 | 0.1428 | -0.0165 | -0.0206 | - |
| 0.0220 | 1   | .   |                             |        |        |        |         |         |   |
| 6104   | NE1 | NE1 | . TRP TRP TRP B B 364 364 . | 0.1563 | 0.1296 | 0.1313 | 0.0047  | -0.0345 | - |
| 0.0102 | 1   | .   |                             |        |        |        |         |         |   |
| 6105   | CE2 | CE2 | . TRP TRP TRP B B 364 364 . | 0.1684 | 0.1123 | 0.1182 | 0.0383  | -0.0109 | - |
| 0.0046 | 1   | .   |                             |        |        |        |         |         |   |
| 6106   | CD2 | CD2 | . TRP TRP TRP B B 364 364 . | 0.1330 | 0.1084 | 0.1184 | 0.0158  | -0.0110 | - |
| 0.0157 | 1   | .   |                             |        |        |        |         |         |   |
| 6107   | CE3 | CE3 | . TRP TRP TRP B B 364 364 . | 0.1160 | 0.1253 | 0.1115 | 0.0437  | -0.0059 | - |
| 0.0287 | 1   | .   |                             |        |        |        |         |         |   |
| 6108   | CZ3 | CZ3 | . TRP TRP TRP B B 364 364 . | 0.1557 | 0.1069 | 0.1362 | 0.0011  | 0.0100  | - |
| 0.0023 | 1   | .   |                             |        |        |        |         |         |   |
| 6109   | CH2 | CH2 | . TRP TRP TRP B B 364 364 . | 0.1580 | 0.1095 | 0.1240 | 0.0282  | -0.0294 | - |
| 0.0281 | 1   | .   |                             |        |        |        |         |         |   |
| 6110   | CZ2 | CZ2 | . TRP TRP TRP B B 364 364 . | 0.1365 | 0.1409 | 0.1261 | 0.0104  | -0.0163 | - |
| 0.0069 | 1   | .   |                             |        |        |        |         |         |   |
| 6111   | C   | C   | . TRP TRP TRP B B 364 364 . | 0.1365 | 0.1069 | 0.1182 | -0.0137 | 0.0091  | - |
| 0.0165 | 1   | .   |                             |        |        |        |         |         |   |
| 6112   | O   | O   | . TRP TRP TRP B B 364 364 . | 0.1570 | 0.1540 | 0.1623 | -0.0338 | -0.0014 | - |
| 0.0014 | 1   | .   |                             |        |        |        |         |         |   |

|        |     |     |                             |        |        |        |         |         |   |
|--------|-----|-----|-----------------------------|--------|--------|--------|---------|---------|---|
| 6113   | N   | N   | . GLY GLY GLY B B 365 365 . | 0.1296 | 0.1023 | 0.0778 | 0.0126  | -0.0065 |   |
| 0.0089 | 1   | .   |                             |        |        |        |         |         |   |
| 6114   | CA  | CA  | . GLY GLY GLY B B 365 365 . | 0.1448 | 0.0881 | 0.0906 | -0.0026 | -0.0054 | - |
| 0.0022 | 1   | .   |                             |        |        |        |         |         |   |
| 6115   | C   | C   | . GLY GLY GLY B B 365 365 . | 0.1121 | 0.0988 | 0.1060 | 0.0001  | -0.0150 | - |
| 0.0038 | 1   | .   |                             |        |        |        |         |         |   |
| 6116   | O   | O   | . GLY GLY GLY B B 365 365 . | 0.1304 | 0.1134 | 0.0999 | -0.0112 | -0.0184 |   |
| 0.0045 | 1   | .   |                             |        |        |        |         |         |   |
| 6117   | N   | N   | . VAL VAL VAL B B 366 366 . | 0.1014 | 0.1026 | 0.1012 | -0.0059 | -0.0041 | - |
| 0.0021 | 1   | .   |                             |        |        |        |         |         |   |
| 6118   | CA  | CA  | . VAL VAL VAL B B 366 366 . | 0.1056 | 0.1062 | 0.0913 | 0.0048  | -0.0021 |   |
| 0.0016 | 1   | .   |                             |        |        |        |         |         |   |
| 6119   | CB  | CB  | . VAL VAL VAL B B 366 366 . | 0.0902 | 0.1480 | 0.0883 | 0.0110  | 0.0049  |   |
| 0.0020 | 1   | .   |                             |        |        |        |         |         |   |
| 6120   | CG1 | CG1 | . VAL VAL VAL B B 366 366 . | 0.1275 | 0.1254 | 0.0657 | 0.0195  | -0.0004 |   |
| 0.0133 | 1   | .   |                             |        |        |        |         |         |   |
| 6121   | CG2 | CG2 | . VAL VAL VAL B B 366 366 . | 0.1478 | 0.1342 | 0.0920 | 0.0157  | -0.0105 |   |
| 0.0155 | 1   | .   |                             |        |        |        |         |         |   |
| 6122   | C   | C   | . VAL VAL VAL B B 366 366 . | 0.1070 | 0.1041 | 0.0998 | 0.0034  | -0.0056 |   |
| 0.0001 | 1   | .   |                             |        |        |        |         |         |   |
| 6123   | O   | O   | . VAL VAL VAL B B 366 366 . | 0.1109 | 0.1075 | 0.1189 | -0.0178 | -0.0090 |   |
| 0.0114 | 1   | .   |                             |        |        |        |         |         |   |
| 6124   | N   | N   | . MET MET MET B B 367 367 . | 0.0822 | 0.0852 | 0.0842 | -0.0145 | -0.0146 |   |
| 0.0165 | 1   | .   |                             |        |        |        |         |         |   |
| 6125   | CA  | CA  | . MET MET MET B B 367 367 . | 0.0990 | 0.0753 | 0.0822 | 0.0011  | -0.0019 |   |
| 0.0209 | 1   | .   |                             |        |        |        |         |         |   |
| 6126   | CB  | CB  | . MET MET MET B B 367 367 . | 0.0918 | 0.0964 | 0.0906 | 0.0025  | -0.0185 | - |
| 0.0076 | 1   | .   |                             |        |        |        |         |         |   |
| 6127   | CG  | CG  | . MET MET MET B B 367 367 . | 0.0657 | 0.1153 | 0.0702 | -0.0117 | -0.0152 |   |
| 0.0196 | 1   | .   |                             |        |        |        |         |         |   |
| 6128   | SD  | SD  | . MET MET MET B B 367 367 . | 0.1130 | 0.1138 | 0.1052 | -0.0042 | 0.0005  | - |
| 0.0039 | 1   | .   |                             |        |        |        |         |         |   |
| 6129   | CE  | CE  | . MET MET MET B B 367 367 . | 0.1634 | 0.1926 | 0.1371 | -0.0206 | 0.0284  | - |
| 0.0475 | 1   | .   |                             |        |        |        |         |         |   |
| 6130   | C   | C   | . MET MET MET B B 367 367 . | 0.0937 | 0.0696 | 0.0702 | -0.0124 | -0.0121 |   |
| 0.0020 | 1   | .   |                             |        |        |        |         |         |   |
| 6131   | O   | O   | . MET MET MET B B 367 367 . | 0.1242 | 0.0817 | 0.0932 | 0.0104  | -0.0200 |   |
| 0.0051 | 1   | .   |                             |        |        |        |         |         |   |
| 6132   | N   | N   | . VAL VAL VAL B B 368 368 . | 0.1036 | 0.0722 | 0.0730 | -0.0071 | -0.0124 |   |
| 0.0000 | 1   | .   |                             |        |        |        |         |         |   |
| 6133   | CA  | CA  | . VAL VAL VAL B B 368 368 . | 0.0851 | 0.1005 | 0.0893 | 0.0071  | -0.0089 |   |
| 0.0036 | 1   | .   |                             |        |        |        |         |         |   |
| 6134   | CB  | CB  | . VAL VAL VAL B B 368 368 . | 0.0827 | 0.0846 | 0.0845 | -0.0036 | 0.0010  | - |
| 0.0041 | 1   | .   |                             |        |        |        |         |         |   |
| 6135   | CG1 | CG1 | . VAL VAL VAL B B 368 368 . | 0.1214 | 0.1081 | 0.0889 | 0.0004  | 0.0144  | - |
| 0.0108 | 1   | .   |                             |        |        |        |         |         |   |
| 6136   | CG2 | CG2 | . VAL VAL VAL B B 368 368 . | 0.1002 | 0.0958 | 0.1254 | 0.0022  | -0.0361 | - |
| 0.0023 | 1   | .   |                             |        |        |        |         |         |   |
| 6137   | C   | C   | . VAL VAL VAL B B 368 368 . | 0.0869 | 0.0769 | 0.0952 | 0.0102  | -0.0105 | - |
| 0.0077 | 1   | .   |                             |        |        |        |         |         |   |
| 6138   | O   | O   | . VAL VAL VAL B B 368 368 . | 0.1049 | 0.1034 | 0.0888 | 0.0176  | -0.0024 |   |
| 0.0087 | 1   | .   |                             |        |        |        |         |         |   |
| 6139   | N   | N   | . SER SER SER B B 369 369 . | 0.0700 | 0.0643 | 0.0648 | -0.0159 | -0.0169 | - |
| 0.0031 | 1   | .   |                             |        |        |        |         |         |   |
| 6140   | CA  | CA  | . SER SER SER B B 369 369 . | 0.0671 | 0.0870 | 0.0742 | -0.0142 | 0.0005  |   |
| 0.0103 | 1   | .   |                             |        |        |        |         |         |   |
| 6141   | CB  | CB  | . SER SER SER B B 369 369 . | 0.1101 | 0.0779 | 0.0937 | -0.0254 | -0.0308 |   |
| 0.0162 | 1   | .   |                             |        |        |        |         |         |   |
| 6142   | OG  | OG  | . SER SER SER B B 369 369 . | 0.1015 | 0.1000 | 0.0925 | -0.0057 | -0.0037 |   |
| 0.0097 | 1   | .   |                             |        |        |        |         |         |   |

|        |     |     |                             |        |        |        |         |         |   |
|--------|-----|-----|-----------------------------|--------|--------|--------|---------|---------|---|
| 6143   | C   | C   | . SER SER SER B B 369 369 . | 0.0895 | 0.0792 | 0.0847 | 0.0063  | 0.0005  |   |
| 0.0102 | 1   | .   |                             |        |        |        |         |         |   |
| 6144   | O   | O   | . SER SER SER B B 369 369 . | 0.0980 | 0.1190 | 0.0942 | 0.0197  | -0.0068 | - |
| 0.0039 | 1   | .   |                             |        |        |        |         |         |   |
| 6145   | N   | N   | . HIS HIS HIS B B 370 370 . | 0.0824 | 0.0859 | 0.0596 | -0.0003 | -0.0115 |   |
| 0.0121 | 1   | .   |                             |        |        |        |         |         |   |
| 6146   | CA  | CA  | . HIS HIS HIS B B 370 370 . | 0.0999 | 0.0854 | 0.0727 | 0.0128  | -0.0090 | - |
| 0.0063 | 1   | .   |                             |        |        |        |         |         |   |
| 6147   | CB  | CB  | . HIS HIS HIS B B 370 370 . | 0.1173 | 0.0925 | 0.0885 | 0.0264  | 0.0175  | - |
| 0.0039 | 1   | .   |                             |        |        |        |         |         |   |
| 6148   | CG  | CG  | . HIS HIS HIS B B 370 370 . | 0.0672 | 0.0735 | 0.0903 | 0.0209  | -0.0232 |   |
| 0.0046 | 1   | .   |                             |        |        |        |         |         |   |
| 6149   | ND1 | ND1 | . HIS HIS HIS B B 370 370 . | 0.0804 | 0.0790 | 0.0921 | 0.0186  | -0.0199 |   |
| 0.0042 | 1   | .   |                             |        |        |        |         |         |   |
| 6150   | CE1 | CE1 | . HIS HIS HIS B B 370 370 . | 0.1499 | 0.0675 | 0.1194 | -0.0142 | -0.0017 |   |
| 0.0054 | 1   | .   |                             |        |        |        |         |         |   |
| 6151   | NE2 | NE2 | . HIS HIS HIS B B 370 370 . | 0.0884 | 0.1123 | 0.0877 | 0.0214  | -0.0080 | - |
| 0.0048 | 1   | .   |                             |        |        |        |         |         |   |
| 6152   | CD2 | CD2 | . HIS HIS HIS B B 370 370 . | 0.0518 | 0.0759 | 0.1163 | -0.0120 | 0.0036  |   |
| 0.0088 | 1   | .   |                             |        |        |        |         |         |   |
| 6153   | C   | C   | . HIS HIS HIS B B 370 370 . | 0.0727 | 0.0899 | 0.0638 | -0.0164 | 0.0032  | - |
| 0.0111 | 1   | .   |                             |        |        |        |         |         |   |
| 6154   | O   | O   | . HIS HIS HIS B B 370 370 . | 0.1079 | 0.0889 | 0.0990 | -0.0041 | 0.0020  |   |
| 0.0009 | 1   | .   |                             |        |        |        |         |         |   |
| 6155   | N   | N   | . ARG ARG ARG B B 371 371 . | 0.0854 | 0.0883 | 0.0592 | -0.0048 | -0.0003 | - |
| 0.0117 | 1   | .   |                             |        |        |        |         |         |   |
| 6156   | CA  | CA  | . ARG ARG ARG B B 371 371 . | 0.0687 | 0.0687 | 0.0826 | 0.0107  | 0.0008  | - |
| 0.0066 | 1   | .   |                             |        |        |        |         |         |   |
| 6157   | CB  | CB  | . ARG ARG ARG B B 371 371 . | 0.0659 | 0.0916 | 0.0778 | 0.0144  | 0.0156  | - |
| 0.0057 | 1   | .   |                             |        |        |        |         |         |   |
| 6158   | CG  | CG  | . ARG ARG ARG B B 371 371 . | 0.0607 | 0.0795 | 0.0569 | 0.0047  | 0.0025  |   |
| 0.0044 | 1   | .   |                             |        |        |        |         |         |   |
| 6159   | CD  | CD  | . ARG ARG ARG B B 371 371 . | 0.0652 | 0.0712 | 0.0625 | -0.0092 | 0.0176  |   |
| 0.0157 | 1   | .   |                             |        |        |        |         |         |   |
| 6160   | NE  | NE  | . ARG ARG ARG B B 371 371 . | 0.0959 | 0.0619 | 0.0907 | 0.0172  | -0.0079 |   |
| 0.0238 | 1   | .   |                             |        |        |        |         |         |   |
| 6161   | CZ  | CZ  | . ARG ARG ARG B B 371 371 . | 0.0803 | 0.0668 | 0.0990 | 0.0075  | -0.0133 |   |
| 0.0045 | 1   | .   |                             |        |        |        |         |         |   |
| 6162   | NH1 | NH1 | . ARG ARG ARG B B 371 371 . | 0.0941 | 0.0896 | 0.0861 | -0.0018 | 0.0144  | - |
| 0.0012 | 1   | .   |                             |        |        |        |         |         |   |
| 6163   | NH2 | NH2 | . ARG ARG ARG B B 371 371 . | 0.0917 | 0.0890 | 0.1010 | -0.0028 | -0.0016 |   |
| 0.0139 | 1   | .   |                             |        |        |        |         |         |   |
| 6164   | C   | C   | . ARG ARG ARG B B 371 371 . | 0.0984 | 0.0829 | 0.0620 | -0.0024 | 0.0043  |   |
| 0.0190 | 1   | .   |                             |        |        |        |         |         |   |
| 6165   | O   | O   | . ARG ARG ARG B B 371 371 . | 0.0923 | 0.0674 | 0.0910 | 0.0045  | -0.0046 |   |
| 0.0069 | 1   | .   |                             |        |        |        |         |         |   |
| 6166   | N   | N   | . SER SER SER B B 372 372 . | 0.0802 | 0.0844 | 0.0917 | 0.0042  | 0.0017  | - |
| 0.0146 | 1   | .   |                             |        |        |        |         |         |   |
| 6167   | CA  | CA  | . SER SER SER B B 372 372 . | 0.0843 | 0.0914 | 0.0789 | 0.0048  | 0.0047  |   |
| 0.0080 | 1   | .   |                             |        |        |        |         |         |   |
| 6168   | CB  | CB  | . SER SER SER B B 372 372 . | 0.0912 | 0.0815 | 0.1020 | -0.0009 | -0.0008 |   |
| 0.0062 | 1   | .   |                             |        |        |        |         |         |   |
| 6169   | OG  | OG  | . SER SER SER B B 372 372 . | 0.0776 | 0.1069 | 0.0808 | 0.0039  | 0.0070  | - |
| 0.0178 | 1   | .   |                             |        |        |        |         |         |   |
| 6170   | C   | C   | . SER SER SER B B 372 372 . | 0.0895 | 0.0816 | 0.0856 | 0.0152  | -0.0127 | - |
| 0.0043 | 1   | .   |                             |        |        |        |         |         |   |
| 6171   | O   | O   | . SER SER SER B B 372 372 . | 0.0827 | 0.0860 | 0.0827 | 0.0138  | -0.0184 | - |
| 0.0030 | 1   | .   |                             |        |        |        |         |         |   |
| 6172   | N   | N   | . GLY GLY GLY B B 373 373 . | 0.0954 | 0.0784 | 0.0699 | -0.0089 | 0.0063  | - |
| 0.0071 | 1   | .   |                             |        |        |        |         |         |   |



|        |     |     |                             |        |        |        |         |         |   |
|--------|-----|-----|-----------------------------|--------|--------|--------|---------|---------|---|
| 6203   | CB  | CB  | . ASP ASP ASP B B 377 377 . | 0.0992 | 0.1178 | 0.1422 | -0.0049 | -0.0239 |   |
| 0.0081 | 1   | .   |                             |        |        |        |         |         |   |
| 6204   | CG  | CG  | . ASP ASP ASP B B 377 377 . | 0.1184 | 0.1631 | 0.1340 | 0.0362  | -0.0016 | - |
| 0.0079 | 1   | .   |                             |        |        |        |         |         |   |
| 6205   | OD1 | OD1 | . ASP ASP ASP B B 377 377 . | 0.1410 | 0.1593 | 0.1549 | -0.0078 | 0.0000  | - |
| 0.0237 | 1   | .   |                             |        |        |        |         |         |   |
| 6206   | OD2 | OD2 | . ASP ASP ASP B B 377 377 . | 0.1244 | 0.1574 | 0.1967 | -0.0249 | 0.0251  | - |
| 0.0358 | 1   | .   |                             |        |        |        |         |         |   |
| 6207   | C   | C   | . ASP ASP ASP B B 377 377 . | 0.0988 | 0.1064 | 0.0979 | -0.0087 | -0.0006 |   |
| 0.0108 | 1   | .   |                             |        |        |        |         |         |   |
| 6208   | O   | O   | . ASP ASP ASP B B 377 377 . | 0.1165 | 0.1371 | 0.1393 | -0.0155 | 0.0089  | - |
| 0.0063 | 1   | .   |                             |        |        |        |         |         |   |
| 6209   | N   | N   | . THR THR THR B B 378 378 . | 0.1157 | 0.0946 | 0.0775 | -0.0068 | -0.0016 | - |
| 0.0159 | 1   | .   |                             |        |        |        |         |         |   |
| 6210   | CA  | CA  | . THR THR THR B B 378 378 . | 0.0908 | 0.0971 | 0.0730 | 0.0089  | -0.0065 |   |
| 0.0000 | 1   | .   |                             |        |        |        |         |         |   |
| 6211   | CB  | CB  | . THR THR THR B B 378 378 . | 0.1071 | 0.1069 | 0.0981 | -0.0009 | -0.0186 | - |
| 0.0002 | 1   | .   |                             |        |        |        |         |         |   |
| 6212   | OG1 | OG1 | . THR THR THR B B 378 378 . | 0.1402 | 0.1423 | 0.1343 | 0.0146  | -0.0009 |   |
| 0.0031 | 1   | .   |                             |        |        |        |         |         |   |
| 6213   | CG2 | CG2 | . THR THR THR B B 378 378 . | 0.1187 | 0.1072 | 0.1106 | 0.0045  | -0.0450 | - |
| 0.0026 | 1   | .   |                             |        |        |        |         |         |   |
| 6214   | C   | C   | . THR THR THR B B 378 378 . | 0.0948 | 0.0971 | 0.0964 | -0.0116 | -0.0017 |   |
| 0.0088 | 1   | .   |                             |        |        |        |         |         |   |
| 6215   | O   | O   | . THR THR THR B B 378 378 . | 0.1111 | 0.1024 | 0.1056 | -0.0042 | 0.0001  | - |
| 0.0001 | 1   | .   |                             |        |        |        |         |         |   |
| 6216   | N   | N   | . PHE PHE PHE B B 379 379 . | 0.0754 | 0.1043 | 0.0966 | 0.0021  | -0.0003 | - |
| 0.0059 | 1   | .   |                             |        |        |        |         |         |   |
| 6217   | CA  | CA  | . PHE PHE PHE B B 379 379 . | 0.0957 | 0.0811 | 0.0795 | 0.0063  | -0.0131 | - |
| 0.0162 | 1   | .   |                             |        |        |        |         |         |   |
| 6218   | CB  | CB  | . PHE PHE PHE B B 379 379 . | 0.0861 | 0.0934 | 0.1086 | 0.0409  | -0.0091 |   |
| 0.0145 | 1   | .   |                             |        |        |        |         |         |   |
| 6219   | CG  | CG  | . PHE PHE PHE B B 379 379 . | 0.1295 | 0.1215 | 0.1304 | 0.0148  | -0.0091 | - |
| 0.0115 | 1   | .   |                             |        |        |        |         |         |   |
| 6220   | CD1 | CD1 | . PHE PHE PHE B B 379 379 . | 0.1478 | 0.1727 | 0.1442 | 0.0378  | -0.0074 |   |
| 0.0063 | 1   | .   |                             |        |        |        |         |         |   |
| 6221   | CE1 | CE1 | . PHE PHE PHE B B 379 379 . | 0.1453 | 0.1618 | 0.1377 | 0.0332  | -0.0035 | - |
| 0.0065 | 1   | .   |                             |        |        |        |         |         |   |
| 6222   | CZ  | CZ  | . PHE PHE PHE B B 379 379 . | 0.1513 | 0.1636 | 0.1692 | -0.0094 | -0.0159 | - |
| 0.0409 | 1   | .   |                             |        |        |        |         |         |   |
| 6223   | CE2 | CE2 | . PHE PHE PHE B B 379 379 . | 0.1287 | 0.1573 | 0.1958 | 0.0082  | -0.0155 | - |
| 0.0016 | 1   | .   |                             |        |        |        |         |         |   |
| 6224   | CD2 | CD2 | . PHE PHE PHE B B 379 379 . | 0.1295 | 0.1255 | 0.1730 | 0.0324  | -0.0153 |   |
| 0.0205 | 1   | .   |                             |        |        |        |         |         |   |
| 6225   | C   | C   | . PHE PHE PHE B B 379 379 . | 0.0917 | 0.0862 | 0.0828 | -0.0043 | -0.0050 | - |
| 0.0131 | 1   | .   |                             |        |        |        |         |         |   |
| 6226   | O   | O   | . PHE PHE PHE B B 379 379 . | 0.1061 | 0.1011 | 0.0992 | -0.0200 | -0.0140 | - |
| 0.0024 | 1   | .   |                             |        |        |        |         |         |   |
| 6227   | N   | N   | . ILE ILE ILE B B 380 380 . | 0.0923 | 0.0883 | 0.0976 | 0.0108  | 0.0079  | - |
| 0.0057 | 1   | .   |                             |        |        |        |         |         |   |
| 6228   | CA  | CA  | . ILE ILE ILE B B 380 380 . | 0.0917 | 0.0852 | 0.0830 | -0.0039 | -0.0112 | - |
| 0.0007 | 1   | .   |                             |        |        |        |         |         |   |
| 6229   | CB  | CB  | . ILE ILE ILE B B 380 380 . | 0.0784 | 0.0775 | 0.1146 | 0.0160  | -0.0240 |   |
| 0.0244 | 1   | .   |                             |        |        |        |         |         |   |
| 6230   | CG1 | CG1 | . ILE ILE ILE B B 380 380 . | 0.0728 | 0.0948 | 0.0920 | -0.0017 | -0.0260 |   |
| 0.0149 | 1   | .   |                             |        |        |        |         |         |   |
| 6231   | CD  | CD  | . ILE ILE ILE B B 380 380 . | 0.1210 | 0.1192 | 0.0696 | -0.0250 | 0.0098  |   |
| 0.0008 | 1   | .   |                             |        |        |        |         |         |   |
| 6232   | CG2 | CG2 | . ILE ILE ILE B B 380 380 . | 0.1054 | 0.0614 | 0.1335 | 0.0277  | -0.0363 |   |
| 0.0010 | 1   | .   |                             |        |        |        |         |         |   |

|        |     |     |                             |        |        |        |         |         |   |
|--------|-----|-----|-----------------------------|--------|--------|--------|---------|---------|---|
| 6233   | C   | C   | . ILE ILE ILE B B 380 380 . | 0.0941 | 0.0949 | 0.0935 | 0.0003  | 0.0107  |   |
| 0.0129 | 1   | .   |                             |        |        |        |         |         |   |
| 6234   | O   | O   | . ILE ILE ILE B B 380 380 . | 0.1198 | 0.1122 | 0.1048 | 0.0027  | -0.0297 | - |
| 0.0066 | 1   | .   |                             |        |        |        |         |         |   |
| 6235   | N   | N   | . ALA ALA ALA B B 381 381 . | 0.1038 | 0.0702 | 0.0958 | -0.0022 | -0.0177 | - |
| 0.0082 | 1   | .   |                             |        |        |        |         |         |   |
| 6236   | CA  | CA  | . ALA ALA ALA B B 381 381 . | 0.0775 | 0.0796 | 0.0961 | -0.0029 | 0.0008  | - |
| 0.0005 | 1   | .   |                             |        |        |        |         |         |   |
| 6237   | CB  | CB  | . ALA ALA ALA B B 381 381 . | 0.1429 | 0.1026 | 0.0959 | 0.0126  | 0.0043  |   |
| 0.0217 | 1   | .   |                             |        |        |        |         |         |   |
| 6238   | C   | C   | . ALA ALA ALA B B 381 381 . | 0.1275 | 0.0871 | 0.1210 | 0.0043  | -0.0053 |   |
| 0.0037 | 1   | .   |                             |        |        |        |         |         |   |
| 6239   | O   | O   | . ALA ALA ALA B B 381 381 . | 0.1035 | 0.0986 | 0.0992 | -0.0013 | 0.0011  |   |
| 0.0087 | 1   | .   |                             |        |        |        |         |         |   |
| 6240   | N   | N   | . ASP ASP ASP B B 382 382 . | 0.1090 | 0.0959 | 0.1111 | -0.0034 | -0.0147 |   |
| 0.0031 | 1   | .   |                             |        |        |        |         |         |   |
| 6241   | CA  | CA  | . ASP ASP ASP B B 382 382 . | 0.0872 | 0.1038 | 0.1142 | -0.0068 | -0.0048 |   |
| 0.0067 | 1   | .   |                             |        |        |        |         |         |   |
| 6242   | CB  | CB  | . ASP ASP ASP B B 382 382 . | 0.1165 | 0.1116 | 0.1246 | -0.0216 | 0.0148  |   |
| 0.0271 | 1   | .   |                             |        |        |        |         |         |   |
| 6243   | CG  | CG  | . ASP ASP ASP B B 382 382 . | 0.1896 | 0.1576 | 0.1407 | -0.0022 | -0.0198 |   |
| 0.0217 | 1   | .   |                             |        |        |        |         |         |   |
| 6244   | OD1 | OD1 | . ASP ASP ASP B B 382 382 . | 0.1323 | 0.1696 | 0.1629 | -0.0083 | -0.0111 |   |
| 0.0419 | 1   | .   |                             |        |        |        |         |         |   |
| 6245   | OD2 | OD2 | . ASP ASP ASP B B 382 382 . | 0.1449 | 0.1760 | 0.2032 | 0.0043  | 0.0030  |   |
| 0.0248 | 1   | .   |                             |        |        |        |         |         |   |
| 6246   | C   | C   | . ASP ASP ASP B B 382 382 . | 0.0938 | 0.0964 | 0.0897 | -0.0242 | -0.0102 |   |
| 0.0064 | 1   | .   |                             |        |        |        |         |         |   |
| 6247   | O   | O   | . ASP ASP ASP B B 382 382 . | 0.1400 | 0.1001 | 0.1016 | -0.0071 | -0.0227 | - |
| 0.0007 | 1   | .   |                             |        |        |        |         |         |   |
| 6248   | N   | N   | . LEU LEU LEU B B 383 383 . | 0.1164 | 0.0753 | 0.1070 | -0.0056 | -0.0061 |   |
| 0.0123 | 1   | .   |                             |        |        |        |         |         |   |
| 6249   | CA  | CA  | . LEU LEU LEU B B 383 383 . | 0.1075 | 0.0934 | 0.0861 | 0.0041  | 0.0047  | - |
| 0.0086 | 1   | .   |                             |        |        |        |         |         |   |
| 6250   | CB  | CB  | . LEU LEU LEU B B 383 383 . | 0.1216 | 0.0882 | 0.1286 | 0.0021  | -0.0306 | - |
| 0.0022 | 1   | .   |                             |        |        |        |         |         |   |
| 6251   | CG  | CG  | . LEU LEU LEU B B 383 383 . | 0.1112 | 0.0831 | 0.1114 | 0.0114  | 0.0029  |   |
| 0.0065 | 1   | .   |                             |        |        |        |         |         |   |
| 6252   | CD1 | CD1 | . LEU LEU LEU B B 383 383 . | 0.1202 | 0.1075 | 0.1201 | 0.0223  | 0.0139  |   |
| 0.0022 | 1   | .   |                             |        |        |        |         |         |   |
| 6253   | CD2 | CD2 | . LEU LEU LEU B B 383 383 . | 0.1331 | 0.1320 | 0.1343 | -0.0254 | -0.0001 |   |
| 0.0124 | 1   | .   |                             |        |        |        |         |         |   |
| 6254   | C   | C   | . LEU LEU LEU B B 383 383 . | 0.1077 | 0.0907 | 0.0964 | 0.0153  | -0.0070 | - |
| 0.0165 | 1   | .   |                             |        |        |        |         |         |   |
| 6255   | O   | O   | . LEU LEU LEU B B 383 383 . | 0.1341 | 0.1145 | 0.1229 | -0.0190 | -0.0182 | - |
| 0.0031 | 1   | .   |                             |        |        |        |         |         |   |
| 6256   | N   | N   | . VAL VAL VAL B B 384 384 . | 0.0938 | 0.0957 | 0.0950 | -0.0067 | -0.0030 |   |
| 0.0026 | 1   | .   |                             |        |        |        |         |         |   |
| 6257   | CA  | CA  | . VAL VAL VAL B B 384 384 . | 0.0986 | 0.0887 | 0.0976 | 0.0031  | 0.0048  |   |
| 0.0026 | 1   | .   |                             |        |        |        |         |         |   |
| 6258   | CB  | CB  | . VAL VAL VAL B B 384 384 . | 0.0892 | 0.0985 | 0.0955 | 0.0132  | 0.0094  |   |
| 0.0250 | 1   | .   |                             |        |        |        |         |         |   |
| 6259   | CG1 | CG1 | . VAL VAL VAL B B 384 384 . | 0.1322 | 0.0925 | 0.1060 | 0.0307  | 0.0199  |   |
| 0.0383 | 1   | .   |                             |        |        |        |         |         |   |
| 6260   | CG2 | CG2 | . VAL VAL VAL B B 384 384 . | 0.1324 | 0.1316 | 0.0764 | -0.0110 | 0.0169  | - |
| 0.0126 | 1   | .   |                             |        |        |        |         |         |   |
| 6261   | C   | C   | . VAL VAL VAL B B 384 384 . | 0.1184 | 0.0956 | 0.0902 | -0.0197 | -0.0096 |   |
| 0.0124 | 1   | .   |                             |        |        |        |         |         |   |
| 6262   | O   | O   | . VAL VAL VAL B B 384 384 . | 0.1479 | 0.1097 | 0.1103 | -0.0078 | -0.0013 |   |
| 0.0126 | 1   | .   |                             |        |        |        |         |         |   |



|        |     |     |                             |        |        |        |         |         |   |
|--------|-----|-----|-----------------------------|--------|--------|--------|---------|---------|---|
| 6263   | N   | N   | . VAL VAL VAL B B 385 385 . | 0.1583 | 0.0826 | 0.1082 | -0.0071 | -0.0160 |   |
| 0.0026 | 1   | .   |                             |        |        |        |         |         |   |
| 6264   | CA  | CA  | . VAL VAL VAL B B 385 385 . | 0.1370 | 0.1011 | 0.1077 | -0.0173 | -0.0194 |   |
| 0.0108 | 1   | .   |                             |        |        |        |         |         |   |
| 6265   | CB  | CB  | . VAL VAL VAL B B 385 385 . | 0.1153 | 0.0707 | 0.0957 | -0.0021 | -0.0218 |   |
| 0.0000 | 1   | .   |                             |        |        |        |         |         |   |
| 6266   | CG1 | CG1 | . VAL VAL VAL B B 385 385 . | 0.1493 | 0.1002 | 0.1251 | -0.0457 | -0.0243 | - |
| 0.0354 | 1   | .   |                             |        |        |        |         |         |   |
| 6267   | CG2 | CG2 | . VAL VAL VAL B B 385 385 . | 0.0981 | 0.1292 | 0.1369 | 0.0103  | -0.0204 |   |
| 0.0201 | 1   | .   |                             |        |        |        |         |         |   |
| 6268   | C   | C   | . VAL VAL VAL B B 385 385 . | 0.1306 | 0.1049 | 0.1159 | -0.0158 | -0.0038 | - |
| 0.0097 | 1   | .   |                             |        |        |        |         |         |   |
| 6269   | O   | O   | . VAL VAL VAL B B 385 385 . | 0.1655 | 0.1507 | 0.1289 | -0.0263 | -0.0176 |   |
| 0.0019 | 1   | .   |                             |        |        |        |         |         |   |
| 6270   | N   | N   | . GLY GLY GLY B B 386 386 . | 0.1111 | 0.1234 | 0.1423 | -0.0119 | 0.0027  |   |
| 0.0150 | 1   | .   |                             |        |        |        |         |         |   |
| 6271   | CA  | CA  | . GLY GLY GLY B B 386 386 . | 0.0933 | 0.1316 | 0.1508 | -0.0175 | -0.0328 |   |
| 0.0121 | 1   | .   |                             |        |        |        |         |         |   |
| 6272   | C   | C   | . GLY GLY GLY B B 386 386 . | 0.1028 | 0.1312 | 0.1490 | -0.0167 | -0.0296 |   |
| 0.0268 | 1   | .   |                             |        |        |        |         |         |   |
| 6273   | O   | O   | . GLY GLY GLY B B 386 386 . | 0.1225 | 0.1634 | 0.1489 | -0.0187 | -0.0477 |   |
| 0.0079 | 1   | .   |                             |        |        |        |         |         |   |
| 6274   | N   | N   | . LEU LEU LEU B B 387 387 . | 0.1109 | 0.1219 | 0.1278 | -0.0198 | -0.0099 |   |
| 0.0310 | 1   | .   |                             |        |        |        |         |         |   |
| 6275   | CA  | CA  | . LEU LEU LEU B B 387 387 . | 0.1308 | 0.1278 | 0.1251 | -0.0088 | -0.0203 |   |
| 0.0097 | 1   | .   |                             |        |        |        |         |         |   |
| 6276   | CB  | CB  | . LEU LEU LEU B B 387 387 . | 0.1693 | 0.1366 | 0.1408 | -0.0041 | -0.0239 | - |
| 0.0017 | 1   | .   |                             |        |        |        |         |         |   |
| 6277   | CG  | CG  | . LEU LEU LEU B B 387 387 . | 0.1196 | 0.1759 | 0.1585 | -0.0165 | -0.0234 |   |
| 0.0022 | 1   | .   |                             |        |        |        |         |         |   |
| 6278   | CD1 | CD1 | . LEU LEU LEU B B 387 387 . | 0.2440 | 0.1780 | 0.1205 | -0.0501 | -0.0376 |   |
| 0.0335 | 1   | .   |                             |        |        |        |         |         |   |
| 6279   | CD2 | CD2 | . LEU LEU LEU B B 387 387 . | 0.1529 | 0.1581 | 0.2150 | 0.0085  | -0.0270 |   |
| 0.0184 | 1   | .   |                             |        |        |        |         |         |   |
| 6280   | C   | C   | . LEU LEU LEU B B 387 387 . | 0.1462 | 0.1276 | 0.1337 | -0.0031 | -0.0146 |   |
| 0.0081 | 1   | .   |                             |        |        |        |         |         |   |
| 6281   | O   | O   | . LEU LEU LEU B B 387 387 . | 0.1903 | 0.1563 | 0.1458 | 0.0049  | -0.0172 |   |
| 0.0164 | 1   | .   |                             |        |        |        |         |         |   |
| 6282   | N   | N   | . CYS CYS CYS B B 388 388 . | 0.1513 | 0.1383 | 0.1632 | -0.0081 | 0.0057  | - |
| 0.0015 | 1   | .   |                             |        |        |        |         |         |   |
| 6283   | CA  | CA  | . CYS CYS CYS B B 388 388 . | 0.1652 | 0.1636 | 0.1632 | -0.0098 | -0.0060 | - |
| 0.0028 | 1   | .   |                             |        |        |        |         |         |   |
| 6284   | CB  | CB  | . CYS CYS CYS B B 388 388 . | 0.2024 | 0.1851 | 0.2077 | -0.0252 | 0.0058  | - |
| 0.0317 | 1   | .   |                             |        |        |        |         |         |   |
| 6285   | SG  | SG  | . CYS CYS CYS B B 388 388 . | 0.3713 | 0.3466 | 0.3688 | -0.0563 | -0.0208 | - |
| 0.0103 | 1   | .   |                             |        |        |        |         |         |   |
| 6286   | C   | C   | . CYS CYS CYS B B 388 388 . | 0.1864 | 0.1583 | 0.1415 | -0.0093 | -0.0044 |   |
| 0.0092 | 1   | .   |                             |        |        |        |         |         |   |
| 6287   | O   | O   | . CYS CYS CYS B B 388 388 . | 0.2000 | 0.1972 | 0.1605 | -0.0201 | -0.0191 |   |
| 0.0116 | 1   | .   |                             |        |        |        |         |         |   |
| 6288   | N   | N   | . THR THR THR B B 389 389 . | 0.1594 | 0.1293 | 0.1198 | -0.0084 | 0.0039  |   |
| 0.0016 | 1   | .   |                             |        |        |        |         |         |   |
| 6289   | CA  | CA  | . THR THR THR B B 389 389 . | 0.1565 | 0.1373 | 0.1463 | -0.0231 | -0.0084 | - |
| 0.0044 | 1   | .   |                             |        |        |        |         |         |   |
| 6290   | CB  | CB  | . THR THR THR B B 389 389 . | 0.1461 | 0.1279 | 0.1327 | -0.0129 | -0.0270 | - |
| 0.0047 | 1   | .   |                             |        |        |        |         |         |   |
| 6291   | OG1 | OG1 | . THR THR THR B B 389 389 . | 0.1295 | 0.1447 | 0.1193 | -0.0129 | -0.0440 |   |
| 0.0269 | 1   | .   |                             |        |        |        |         |         |   |
| 6292   | CG2 | CG2 | . THR THR THR B B 389 389 . | 0.1756 | 0.1312 | 0.1714 | 0.0294  | -0.0103 |   |
| 0.0228 | 1   | .   |                             |        |        |        |         |         |   |

|        |     |     |                             |        |        |        |         |         |   |
|--------|-----|-----|-----------------------------|--------|--------|--------|---------|---------|---|
| 6293   | C   | C   | . THR THR THR B B 389 389 . | 0.1555 | 0.1370 | 0.1207 | -0.0016 | -0.0138 |   |
| 0.0062 | 1   | .   |                             |        |        |        |         |         |   |
| 6294   | O   | O   | . THR THR THR B B 389 389 . | 0.1867 | 0.1588 | 0.1640 | -0.0177 | 0.0037  | - |
| 0.0085 | 1   | .   |                             |        |        |        |         |         |   |
| 6295   | N   | N   | . GLY GLY GLY B B 390 390 . | 0.1423 | 0.1004 | 0.1360 | 0.0063  | -0.0319 | - |
| 0.0182 | 1   | .   |                             |        |        |        |         |         |   |
| 6296   | CA  | CA  | . GLY GLY GLY B B 390 390 . | 0.1105 | 0.1258 | 0.1298 | 0.0006  | -0.0200 | - |
| 0.0283 | 1   | .   |                             |        |        |        |         |         |   |
| 6297   | C   | C   | . GLY GLY GLY B B 390 390 . | 0.1128 | 0.1147 | 0.1009 | 0.0073  | -0.0244 | - |
| 0.0091 | 1   | .   |                             |        |        |        |         |         |   |
| 6298   | O   | O   | . GLY GLY GLY B B 390 390 . | 0.1218 | 0.1128 | 0.0795 | -0.0133 | 0.0012  |   |
| 0.0003 | 1   | .   |                             |        |        |        |         |         |   |
| 6299   | N   | N   | . GLN GLN GLN B B 391 391 . | 0.1185 | 0.1008 | 0.0948 | 0.0011  | -0.0105 |   |
| 0.0041 | 1   | .   |                             |        |        |        |         |         |   |
| 6300   | CA  | CA  | . GLN GLN GLN B B 391 391 . | 0.0987 | 0.0850 | 0.0825 | -0.0181 | 0.0031  |   |
| 0.0136 | 1   | .   |                             |        |        |        |         |         |   |
| 6301   | CB  | CB  | . GLN GLN GLN B B 391 391 . | 0.1500 | 0.1468 | 0.1380 | -0.0252 | -0.0033 |   |
| 0.0247 | 1   | .   |                             |        |        |        |         |         |   |
| 6302   | CG  | CG  | . GLN GLN GLN B B 391 391 . | 0.2044 | 0.1846 | 0.1738 | -0.0351 | -0.0028 |   |
| 0.0793 | 1   | .   |                             |        |        |        |         |         |   |
| 6303   | CD  | CD  | . GLN GLN GLN B B 391 391 . | 0.1582 | 0.1465 | 0.1656 | -0.0243 | -0.0103 |   |
| 0.0319 | 1   | .   |                             |        |        |        |         |         |   |
| 6304   | OE1 | OE1 | . GLN GLN GLN B B 391 391 . | 0.1816 | 0.1630 | 0.1097 | -0.0160 | -0.0054 |   |
| 0.0254 | 1   | .   |                             |        |        |        |         |         |   |
| 6305   | NE2 | NE2 | . GLN GLN GLN B B 391 391 . | 0.1749 | 0.1497 | 0.1919 | 0.0088  | -0.0377 |   |
| 0.0083 | 1   | .   |                             |        |        |        |         |         |   |
| 6306   | C   | C   | . GLN GLN GLN B B 391 391 . | 0.0784 | 0.0763 | 0.0834 | 0.0222  | -0.0072 | - |
| 0.0083 | 1   | .   |                             |        |        |        |         |         |   |
| 6307   | O   | O   | . GLN GLN GLN B B 391 391 . | 0.0928 | 0.0908 | 0.0999 | 0.0059  | -0.0140 | - |
| 0.0146 | 1   | .   |                             |        |        |        |         |         |   |
| 6308   | N   | N   | . ILE ILE ILE B B 392 392 . | 0.1200 | 0.0837 | 0.0820 | -0.0056 | -0.0165 | - |
| 0.0055 | 1   | .   |                             |        |        |        |         |         |   |
| 6309   | CA  | CA  | . ILE ILE ILE B B 392 392 . | 0.0931 | 0.0919 | 0.0814 | -0.0078 | 0.0011  | - |
| 0.0018 | 1   | .   |                             |        |        |        |         |         |   |
| 6310   | CB  | CB  | . ILE ILE ILE B B 392 392 . | 0.1050 | 0.0666 | 0.0867 | 0.0011  | 0.0052  | - |
| 0.0093 | 1   | .   |                             |        |        |        |         |         |   |
| 6311   | CG1 | CG1 | . ILE ILE ILE B B 392 392 . | 0.1218 | 0.1019 | 0.0570 | 0.0052  | 0.0095  | - |
| 0.0113 | 1   | .   |                             |        |        |        |         |         |   |
| 6312   | CD  | CD  | . ILE ILE ILE B B 392 392 . | 0.1042 | 0.1365 | 0.1165 | -0.0324 | 0.0047  | - |
| 0.0077 | 1   | .   |                             |        |        |        |         |         |   |
| 6313   | CG2 | CG2 | . ILE ILE ILE B B 392 392 . | 0.1206 | 0.0972 | 0.1472 | 0.0029  | -0.0145 | - |
| 0.0240 | 1   | .   |                             |        |        |        |         |         |   |
| 6314   | C   | C   | . ILE ILE ILE B B 392 392 . | 0.0880 | 0.0906 | 0.0821 | 0.0147  | 0.0024  | - |
| 0.0104 | 1   | .   |                             |        |        |        |         |         |   |
| 6315   | O   | O   | . ILE ILE ILE B B 392 392 . | 0.0945 | 0.0981 | 0.1269 | 0.0179  | -0.0035 | - |
| 0.0109 | 1   | .   |                             |        |        |        |         |         |   |
| 6316   | N   | N   | . LYS LYS LYS B B 393 393 . | 0.0763 | 0.0599 | 0.0713 | -0.0060 | -0.0114 | - |
| 0.0045 | 1   | .   |                             |        |        |        |         |         |   |
| 6317   | CA  | CA  | . LYS LYS LYS B B 393 393 . | 0.0814 | 0.0821 | 0.0488 | -0.0261 | 0.0060  | - |
| 0.0004 | 1   | .   |                             |        |        |        |         |         |   |
| 6318   | CB  | CB  | . LYS LYS LYS B B 393 393 . | 0.1212 | 0.0571 | 0.1032 | -0.0090 | 0.0135  |   |
| 0.0035 | 1   | .   |                             |        |        |        |         |         |   |
| 6319   | CG  | CG  | . LYS LYS LYS B B 393 393 . | 0.0874 | 0.0787 | 0.0868 | 0.0064  | 0.0007  |   |
| 0.0219 | 1   | .   |                             |        |        |        |         |         |   |
| 6320   | CD  | CD  | . LYS LYS LYS B B 393 393 . | 0.0963 | 0.0811 | 0.1223 | 0.0056  | 0.0189  |   |
| 0.0060 | 1   | .   |                             |        |        |        |         |         |   |
| 6321   | CE  | CE  | . LYS LYS LYS B B 393 393 . | 0.1328 | 0.0661 | 0.0989 | -0.0176 | -0.0032 | - |
| 0.0100 | 1   | .   |                             |        |        |        |         |         |   |
| 6322   | NZ  | NZ  | . LYS LYS LYS B B 393 393 . | 0.0945 | 0.0761 | 0.1173 | 0.0045  | -0.0047 |   |
| 0.0171 | 1   | .   |                             |        |        |        |         |         |   |

|        |     |     |                             |        |        |        |         |         |   |
|--------|-----|-----|-----------------------------|--------|--------|--------|---------|---------|---|
| 6323   | C   | C   | . LYS LYS LYS B B 393 393 . | 0.0955 | 0.0655 | 0.0818 | 0.0073  | 0.0023  |   |
| 0.0067 | 1   | .   |                             |        |        |        |         |         |   |
| 6324   | O   | O   | . LYS LYS LYS B B 393 393 . | 0.0944 | 0.0991 | 0.0749 | 0.0178  | 0.0065  | - |
| 0.0082 | 1   | .   |                             |        |        |        |         |         |   |
| 6325   | N   | N   | . THR THR THR B B 394 394 . | 0.0638 | 0.0839 | 0.0524 | -0.0070 | -0.0117 |   |
| 0.0099 | 1   | .   |                             |        |        |        |         |         |   |
| 6326   | CA  | CA  | . THR THR THR B B 394 394 . | 0.0608 | 0.0941 | 0.0679 | 0.0048  | 0.0019  |   |
| 0.0010 | 1   | .   |                             |        |        |        |         |         |   |
| 6327   | CB  | CB  | . THR THR THR B B 394 394 . | 0.0841 | 0.0784 | 0.0878 | -0.0148 | 0.0128  |   |
| 0.0015 | 1   | .   |                             |        |        |        |         |         |   |
| 6328   | OG1 | OG1 | . THR THR THR B B 394 394 . | 0.0820 | 0.0869 | 0.0741 | 0.0015  | 0.0097  |   |
| 0.0077 | 1   | .   |                             |        |        |        |         |         |   |
| 6329   | CG2 | CG2 | . THR THR THR B B 394 394 . | 0.1211 | 0.0741 | 0.0906 | 0.0069  | 0.0001  |   |
| 0.0091 | 1   | .   |                             |        |        |        |         |         |   |
| 6330   | C   | C   | . THR THR THR B B 394 394 . | 0.0662 | 0.0842 | 0.0623 | 0.0077  | 0.0085  |   |
| 0.0004 | 1   | .   |                             |        |        |        |         |         |   |
| 6331   | O   | O   | . THR THR THR B B 394 394 . | 0.0784 | 0.0903 | 0.0866 | 0.0000  | 0.0118  |   |
| 0.0173 | 1   | .   |                             |        |        |        |         |         |   |
| 6332   | N   | N   | . GLY GLY GLY B B 395 395 . | 0.0814 | 0.0741 | 0.0791 | -0.0054 | -0.0083 | - |
| 0.0065 | 1   | .   |                             |        |        |        |         |         |   |
| 6333   | CA  | CA  | . GLY GLY GLY B B 395 395 . | 0.0841 | 0.0927 | 0.0894 | 0.0107  | 0.0034  | - |
| 0.0003 | 1   | .   |                             |        |        |        |         |         |   |
| 6334   | C   | C   | . GLY GLY GLY B B 395 395 . | 0.0901 | 0.0866 | 0.0995 | 0.0045  | 0.0062  |   |
| 0.0040 | 1   | .   |                             |        |        |        |         |         |   |
| 6335   | O   | O   | . GLY GLY GLY B B 395 395 . | 0.0919 | 0.0775 | 0.0859 | -0.0035 | -0.0109 |   |
| 0.0068 | 1   | .   |                             |        |        |        |         |         |   |
| 6336   | N   | N   | . ALA ALA ALA B B 396 396 . | 0.0865 | 0.0786 | 0.0785 | 0.0066  | -0.0063 |   |
| 0.0134 | 1   | .   |                             |        |        |        |         |         |   |
| 6337   | CA  | CA  | . ALA ALA ALA B B 396 396 . | 0.0710 | 0.0685 | 0.0870 | -0.0013 | -0.0018 |   |
| 0.0188 | 1   | .   |                             |        |        |        |         |         |   |
| 6338   | CB  | CB  | . ALA ALA ALA B B 396 396 . | 0.0603 | 0.1004 | 0.1105 | -0.0106 | -0.0091 |   |
| 0.0100 | 1   | .   |                             |        |        |        |         |         |   |
| 6339   | C   | C   | . ALA ALA ALA B B 396 396 . | 0.0875 | 0.0796 | 0.1032 | 0.0102  | 0.0073  |   |
| 0.0112 | 1   | .   |                             |        |        |        |         |         |   |
| 6340   | O   | O   | . ALA ALA ALA B B 396 396 . | 0.0924 | 0.0935 | 0.0848 | -0.0015 | -0.0005 |   |
| 0.0080 | 1   | .   |                             |        |        |        |         |         |   |
| 6341   | N   | N   | . PRO PRO PRO B B 397 397 . | 0.0836 | 0.0583 | 0.0852 | 0.0085  | 0.0260  |   |
| 0.0014 | 1   | .   |                             |        |        |        |         |         |   |
| 6342   | CA  | CA  | . PRO PRO PRO B B 397 397 . | 0.1166 | 0.0965 | 0.0886 | 0.0011  | 0.0073  |   |
| 0.0118 | 1   | .   |                             |        |        |        |         |         |   |
| 6343   | CB  | CB  | . PRO PRO PRO B B 397 397 . | 0.0809 | 0.1067 | 0.1047 | 0.0092  | 0.0173  |   |
| 0.0152 | 1   | .   |                             |        |        |        |         |         |   |
| 6344   | CG  | CG  | . PRO PRO PRO B B 397 397 . | 0.0906 | 0.0951 | 0.1172 | -0.0113 | 0.0138  |   |
| 0.0250 | 1   | .   |                             |        |        |        |         |         |   |
| 6345   | CD  | CD  | . PRO PRO PRO B B 397 397 . | 0.0886 | 0.0838 | 0.1020 | 0.0060  | 0.0446  | - |
| 0.0013 | 1   | .   |                             |        |        |        |         |         |   |
| 6346   | C   | C   | . PRO PRO PRO B B 397 397 . | 0.1106 | 0.0970 | 0.0952 | 0.0089  | 0.0036  |   |
| 0.0060 | 1   | .   |                             |        |        |        |         |         |   |
| 6347   | O   | O   | . PRO PRO PRO B B 397 397 . | 0.1207 | 0.1057 | 0.0879 | 0.0184  | 0.0065  |   |
| 0.0029 | 1   | .   |                             |        |        |        |         |         |   |
| 6348   | N   | N   | . CYS CYS CYS B B 398 398 . | 0.0859 | 0.0790 | 0.0578 | -0.0017 | 0.0033  |   |
| 0.0088 | 1   | .   |                             |        |        |        |         |         |   |
| 6349   | CA  | CA  | . CYS CYS CYS B B 398 398 . | 0.0939 | 0.0791 | 0.0618 | 0.0131  | 0.0018  | - |
| 0.0027 | 1   | .   |                             |        |        |        |         |         |   |
| 6350   | CB  | CB  | . CYS CYS CYS B B 398 398 . | 0.1154 | 0.0955 | 0.0674 | -0.0062 | 0.0068  | - |
| 0.0018 | 1   | .   |                             |        |        |        |         |         |   |
| 6351   | SG  | SG  | . CYS CYS CYS B B 398 398 . | 0.0996 | 0.1297 | 0.1027 | -0.0019 | -0.0009 |   |
| 0.0034 | 1   | .   |                             |        |        |        |         |         |   |
| 6352   | C   | C   | . CYS CYS CYS B B 398 398 . | 0.0796 | 0.0899 | 0.0665 | 0.0185  | 0.0086  |   |
| 0.0097 | 1   | .   |                             |        |        |        |         |         |   |

|        |     |     |                             |        |        |        |         |         |   |
|--------|-----|-----|-----------------------------|--------|--------|--------|---------|---------|---|
| 6353   | O   | O   | . CYS CYS CYS B B 398 398 . | 0.1161 | 0.0778 | 0.0934 | 0.0065  | 0.0117  |   |
| 0.0158 | 1   | .   |                             |        |        |        |         |         |   |
| 6354   | N   | N   | . ARG ARG ARG B B 399 399 . | 0.0770 | 0.0641 | 0.0605 | -0.0075 | 0.0147  | - |
| 0.0092 | 1   | .   |                             |        |        |        |         |         |   |
| 6355   | CA  | CA  | . ARG ARG ARG B B 399 399 . | 0.0737 | 0.0548 | 0.0759 | 0.0048  | 0.0214  | - |
| 0.0079 | 1   | .   |                             |        |        |        |         |         |   |
| 6356   | CB  | CB  | . ARG ARG ARG B B 399 399 . | 0.0725 | 0.0447 | 0.0887 | -0.0043 | -0.0038 |   |
| 0.0262 | 1   | .   |                             |        |        |        |         |         |   |
| 6357   | CG  | CG  | . ARG ARG ARG B B 399 399 . | 0.0748 | 0.0719 | 0.0994 | 0.0019  | -0.0056 | - |
| 0.0076 | 1   | .   |                             |        |        |        |         |         |   |
| 6358   | CD  | CD  | . ARG ARG ARG B B 399 399 . | 0.0786 | 0.0582 | 0.0698 | 0.0300  | 0.0116  | - |
| 0.0131 | 1   | .   |                             |        |        |        |         |         |   |
| 6359   | NE  | NE  | . ARG ARG ARG B B 399 399 . | 0.0654 | 0.0740 | 0.0536 | 0.0151  | -0.0057 | - |
| 0.0116 | 1   | .   |                             |        |        |        |         |         |   |
| 6360   | CZ  | CZ  | . ARG ARG ARG B B 399 399 . | 0.0641 | 0.0710 | 0.0487 | -0.0065 | -0.0046 |   |
| 0.0124 | 1   | .   |                             |        |        |        |         |         |   |
| 6361   | NH1 | NH1 | . ARG ARG ARG B B 399 399 . | 0.0736 | 0.0932 | 0.1027 | -0.0086 | 0.0029  |   |
| 0.0160 | 1   | .   |                             |        |        |        |         |         |   |
| 6362   | NH2 | NH2 | . ARG ARG ARG B B 399 399 . | 0.0937 | 0.0921 | 0.0767 | 0.0212  | -0.0044 | - |
| 0.0097 | 1   | .   |                             |        |        |        |         |         |   |
| 6363   | C   | C   | . ARG ARG ARG B B 399 399 . | 0.0774 | 0.0639 | 0.0733 | 0.0013  | 0.0061  |   |
| 0.0000 | 1   | .   |                             |        |        |        |         |         |   |
| 6364   | O   | O   | . ARG ARG ARG B B 399 399 . | 0.0795 | 0.0750 | 0.0857 | 0.0020  | -0.0005 |   |
| 0.0047 | 1   | .   |                             |        |        |        |         |         |   |
| 6365   | N   | N   | . SER SER SER B B 400 400 . | 0.0754 | 0.0615 | 0.0682 | 0.0053  | 0.0073  |   |
| 0.0050 | 1   | .   |                             |        |        |        |         |         |   |
| 6366   | CA  | CA  | . SER SER SER B B 400 400 . | 0.0625 | 0.0583 | 0.0647 | 0.0084  | -0.0033 |   |
| 0.0063 | 1   | .   |                             |        |        |        |         |         |   |
| 6367   | CB  | CB  | . SER SER SER B B 400 400 . | 0.0832 | 0.0769 | 0.1062 | 0.0122  | 0.0045  |   |
| 0.0213 | 1   | .   |                             |        |        |        |         |         |   |
| 6368   | OG  | OG  | . SER SER SER B B 400 400 . | 0.0804 | 0.0830 | 0.0962 | -0.0021 | -0.0004 |   |
| 0.0012 | 1   | .   |                             |        |        |        |         |         |   |
| 6369   | C   | C   | . SER SER SER B B 400 400 . | 0.0672 | 0.0734 | 0.0737 | -0.0026 | 0.0051  | - |
| 0.0089 | 1   | .   |                             |        |        |        |         |         |   |
| 6370   | O   | O   | . SER SER SER B B 400 400 . | 0.0799 | 0.1029 | 0.0866 | -0.0154 | -0.0114 | - |
| 0.0095 | 1   | .   |                             |        |        |        |         |         |   |
| 6371   | N   | N   | . GLU GLU GLU B B 401 401 . | 0.0659 | 0.0893 | 0.0840 | 0.0083  | 0.0054  |   |
| 0.0047 | 1   | .   |                             |        |        |        |         |         |   |
| 6372   | CA  | CA  | . GLU GLU GLU B B 401 401 . | 0.0871 | 0.0658 | 0.0662 | 0.0191  | -0.0086 |   |
| 0.0045 | 1   | .   |                             |        |        |        |         |         |   |
| 6373   | CB  | CB  | . GLU GLU GLU B B 401 401 . | 0.0892 | 0.0621 | 0.0835 | -0.0168 | 0.0033  |   |
| 0.0012 | 1   | .   |                             |        |        |        |         |         |   |
| 6374   | CG  | CG  | . GLU GLU GLU B B 401 401 . | 0.0792 | 0.0795 | 0.0935 | -0.0086 | -0.0112 |   |
| 0.0274 | 1   | .   |                             |        |        |        |         |         |   |
| 6375   | CD  | CD  | . GLU GLU GLU B B 401 401 . | 0.0737 | 0.0931 | 0.1019 | 0.0246  | 0.0138  |   |
| 0.0123 | 1   | .   |                             |        |        |        |         |         |   |
| 6376   | OE1 | OE1 | . GLU GLU GLU B B 401 401 . | 0.0898 | 0.0827 | 0.0693 | 0.0012  | 0.0008  |   |
| 0.0125 | 1   | .   |                             |        |        |        |         |         |   |
| 6377   | OE2 | OE2 | . GLU GLU GLU B B 401 401 . | 0.0936 | 0.0834 | 0.0884 | 0.0076  | 0.0046  |   |
| 0.0104 | 1   | .   |                             |        |        |        |         |         |   |
| 6378   | C   | C   | . GLU GLU GLU B B 401 401 . | 0.0891 | 0.0868 | 0.0877 | 0.0062  | -0.0015 |   |
| 0.0108 | 1   | .   |                             |        |        |        |         |         |   |
| 6379   | O   | O   | . GLU GLU GLU B B 401 401 . | 0.0874 | 0.1038 | 0.0880 | 0.0162  | -0.0008 | - |
| 0.0033 | 1   | .   |                             |        |        |        |         |         |   |
| 6380   | N   | N   | . ARG ARG ARG B B 402 402 . | 0.0806 | 0.0859 | 0.0623 | 0.0087  | 0.0096  |   |
| 0.0062 | 1   | .   |                             |        |        |        |         |         |   |
| 6381   | CA  | CA  | . ARG ARG ARG B B 402 402 . | 0.0683 | 0.0775 | 0.0806 | -0.0080 | 0.0050  | - |
| 0.0046 | 1   | .   |                             |        |        |        |         |         |   |
| 6382   | CB  | CB  | . ARG ARG ARG B B 402 402 . | 0.0712 | 0.0745 | 0.0590 | 0.0001  | 0.0139  | - |
| 0.0199 | 1   | .   |                             |        |        |        |         |         |   |

|        |     |     |                             |        |        |        |         |         |   |
|--------|-----|-----|-----------------------------|--------|--------|--------|---------|---------|---|
| 6383   | CG  | CG  | . ARG ARG ARG B B 402 402 . | 0.0942 | 0.0722 | 0.0852 | 0.0113  | -0.0219 |   |
| 0.0016 | 1   | .   |                             |        |        |        |         |         |   |
| 6384   | CD  | CD  | . ARG ARG ARG B B 402 402 . | 0.0795 | 0.0509 | 0.1140 | 0.0091  | 0.0099  | - |
| 0.0112 | 1   | .   |                             |        |        |        |         |         |   |
| 6385   | NE  | NE  | . ARG ARG ARG B B 402 402 . | 0.0733 | 0.0679 | 0.0949 | -0.0076 | 0.0062  |   |
| 0.0022 | 1   | .   |                             |        |        |        |         |         |   |
| 6386   | CZ  | CZ  | . ARG ARG ARG B B 402 402 . | 0.0611 | 0.0554 | 0.0848 | -0.0084 | 0.0155  | - |
| 0.0060 | 1   | .   |                             |        |        |        |         |         |   |
| 6387   | NH1 | NH1 | . ARG ARG ARG B B 402 402 . | 0.1035 | 0.0832 | 0.0816 | -0.0045 | -0.0090 |   |
| 0.0012 | 1   | .   |                             |        |        |        |         |         |   |
| 6388   | NH2 | NH2 | . ARG ARG ARG B B 402 402 . | 0.0656 | 0.0837 | 0.0728 | -0.0085 | 0.0253  | - |
| 0.0036 | 1   | .   |                             |        |        |        |         |         |   |
| 6389   | C   | C   | . ARG ARG ARG B B 402 402 . | 0.0724 | 0.0775 | 0.0854 | 0.0025  | 0.0007  | - |
| 0.0087 | 1   | .   |                             |        |        |        |         |         |   |
| 6390   | O   | O   | . ARG ARG ARG B B 402 402 . | 0.0747 | 0.0704 | 0.0750 | -0.0029 | 0.0014  |   |
| 0.0035 | 1   | .   |                             |        |        |        |         |         |   |
| 6391   | N   | N   | . LEU LEU LEU B B 403 403 . | 0.0862 | 0.0830 | 0.0868 | 0.0022  | 0.0122  |   |
| 0.0045 | 1   | .   |                             |        |        |        |         |         |   |
| 6392   | CA  | CA  | . LEU LEU LEU B B 403 403 . | 0.0858 | 0.0932 | 0.0954 | -0.0022 | -0.0074 | - |
| 0.0008 | 1   | .   |                             |        |        |        |         |         |   |
| 6393   | CB  | CB  | . LEU LEU LEU B B 403 403 . | 0.0816 | 0.0900 | 0.1017 | 0.0003  | -0.0009 |   |
| 0.0277 | 1   | .   |                             |        |        |        |         |         |   |
| 6394   | CG  | CG  | . LEU LEU LEU B B 403 403 . | 0.1041 | 0.0969 | 0.0962 | -0.0140 | -0.0002 | - |
| 0.0376 | 1   | .   |                             |        |        |        |         |         |   |
| 6395   | CD1 | CD1 | . LEU LEU LEU B B 403 403 . | 0.1168 | 0.1166 | 0.0612 | 0.0120  | 0.0333  | - |
| 0.0209 | 1   | .   |                             |        |        |        |         |         |   |
| 6396   | CD2 | CD2 | . LEU LEU LEU B B 403 403 . | 0.0914 | 0.0685 | 0.1259 | -0.0103 | -0.0193 | - |
| 0.0164 | 1   | .   |                             |        |        |        |         |         |   |
| 6397   | C   | C   | . LEU LEU LEU B B 403 403 . | 0.0730 | 0.0767 | 0.0617 | -0.0057 | 0.0110  | - |
| 0.0011 | 1   | .   |                             |        |        |        |         |         |   |
| 6398   | O   | O   | . LEU LEU LEU B B 403 403 . | 0.0868 | 0.0730 | 0.0985 | 0.0153  | -0.0145 | - |
| 0.0088 | 1   | .   |                             |        |        |        |         |         |   |
| 6399   | N   | N   | . ALA ALA ALA B B 404 404 . | 0.0663 | 0.0892 | 0.0971 | -0.0002 | 0.0121  |   |
| 0.0012 | 1   | .   |                             |        |        |        |         |         |   |
| 6400   | CA  | CA  | . ALA ALA ALA B B 404 404 . | 0.0786 | 0.0826 | 0.0720 | -0.0174 | 0.0054  | - |
| 0.0056 | 1   | .   |                             |        |        |        |         |         |   |
| 6401   | CB  | CB  | . ALA ALA ALA B B 404 404 . | 0.1097 | 0.0765 | 0.1158 | -0.0051 | 0.0112  | - |
| 0.0270 | 1   | .   |                             |        |        |        |         |         |   |
| 6402   | C   | C   | . ALA ALA ALA B B 404 404 . | 0.0626 | 0.0730 | 0.0825 | 0.0136  | -0.0024 |   |
| 0.0120 | 1   | .   |                             |        |        |        |         |         |   |
| 6403   | O   | O   | . ALA ALA ALA B B 404 404 . | 0.0881 | 0.0931 | 0.0919 | 0.0055  | -0.0094 |   |
| 0.0008 | 1   | .   |                             |        |        |        |         |         |   |
| 6404   | N   | N   | . LYS LYS LYS B B 405 405 . | 0.0811 | 0.0724 | 0.0800 | -0.0021 | 0.0068  |   |
| 0.0083 | 1   | .   |                             |        |        |        |         |         |   |
| 6405   | CA  | CA  | . LYS LYS LYS B B 405 405 . | 0.0710 | 0.0629 | 0.0865 | -0.0007 | -0.0122 | - |
| 0.0018 | 1   | .   |                             |        |        |        |         |         |   |
| 6406   | CB  | CB  | . LYS LYS LYS B B 405 405 . | 0.0923 | 0.0715 | 0.0836 | -0.0012 | 0.0020  | - |
| 0.0020 | 1   | .   |                             |        |        |        |         |         |   |
| 6407   | CG  | CG  | . LYS LYS LYS B B 405 405 . | 0.1141 | 0.0728 | 0.0822 | 0.0080  | 0.0010  | - |
| 0.0153 | 1   | .   |                             |        |        |        |         |         |   |
| 6408   | CD  | CD  | . LYS LYS LYS B B 405 405 . | 0.1258 | 0.0832 | 0.0917 | 0.0267  | -0.0229 | - |
| 0.0088 | 1   | .   |                             |        |        |        |         |         |   |
| 6409   | CE  | CE  | . LYS LYS LYS B B 405 405 . | 0.1035 | 0.0635 | 0.0782 | 0.0307  | -0.0199 | - |
| 0.0166 | 1   | .   |                             |        |        |        |         |         |   |
| 6410   | NZ  | NZ  | . LYS LYS LYS B B 405 405 . | 0.1150 | 0.0732 | 0.0690 | 0.0104  | 0.0040  | - |
| 0.0019 | 1   | .   |                             |        |        |        |         |         |   |
| 6411   | C   | C   | . LYS LYS LYS B B 405 405 . | 0.0778 | 0.0732 | 0.0687 | 0.0016  | -0.0032 |   |
| 0.0082 | 1   | .   |                             |        |        |        |         |         |   |
| 6412   | O   | O   | . LYS LYS LYS B B 405 405 . | 0.0828 | 0.0726 | 0.0815 | -0.0034 | -0.0072 |   |
| 0.0040 | 1   | .   |                             |        |        |        |         |         |   |

|        |     |     |                             |        |        |        |         |         |   |
|--------|-----|-----|-----------------------------|--------|--------|--------|---------|---------|---|
| 6413   | N   | N   | . TYR TYR TYR B B 406 406 . | 0.0742 | 0.0645 | 0.0808 | 0.0117  | 0.0119  | - |
| 0.0083 | 1   | .   |                             |        |        |        |         |         |   |
| 6414   | CA  | CA  | . TYR TYR TYR B B 406 406 . | 0.0800 | 0.0636 | 0.0676 | 0.0015  | 0.0089  | - |
| 0.0148 | 1   | .   |                             |        |        |        |         |         |   |
| 6415   | CB  | CB  | . TYR TYR TYR B B 406 406 . | 0.0845 | 0.0858 | 0.0812 | -0.0135 | 0.0200  |   |
| 0.0131 | 1   | .   |                             |        |        |        |         |         |   |
| 6416   | CG  | CG  | . TYR TYR TYR B B 406 406 . | 0.0664 | 0.0449 | 0.0550 | 0.0034  | 0.0026  | - |
| 0.0055 | 1   | .   |                             |        |        |        |         |         |   |
| 6417   | CD1 | CD1 | . TYR TYR TYR B B 406 406 . | 0.0876 | 0.0583 | 0.0789 | 0.0232  | 0.0039  |   |
| 0.0015 | 1   | .   |                             |        |        |        |         |         |   |
| 6418   | CE1 | CE1 | . TYR TYR TYR B B 406 406 . | 0.0728 | 0.0927 | 0.0798 | -0.0008 | 0.0012  |   |
| 0.0213 | 1   | .   |                             |        |        |        |         |         |   |
| 6419   | CZ  | CZ  | . TYR TYR TYR B B 406 406 . | 0.0755 | 0.0865 | 0.0768 | -0.0138 | 0.0065  |   |
| 0.0170 | 1   | .   |                             |        |        |        |         |         |   |
| 6420   | OH  | OH  | . TYR TYR TYR B B 406 406 . | 0.1026 | 0.0749 | 0.0975 | 0.0026  | 0.0017  |   |
| 0.0046 | 1   | .   |                             |        |        |        |         |         |   |
| 6421   | CE2 | CE2 | . TYR TYR TYR B B 406 406 . | 0.1015 | 0.0866 | 0.0813 | -0.0040 | 0.0056  | - |
| 0.0039 | 1   | .   |                             |        |        |        |         |         |   |
| 6422   | CD2 | CD2 | . TYR TYR TYR B B 406 406 . | 0.0963 | 0.0958 | 0.0933 | -0.0159 | -0.0034 | - |
| 0.0015 | 1   | .   |                             |        |        |        |         |         |   |
| 6423   | C   | C   | . TYR TYR TYR B B 406 406 . | 0.0935 | 0.0929 | 0.0705 | 0.0017  | 0.0071  | - |
| 0.0042 | 1   | .   |                             |        |        |        |         |         |   |
| 6424   | O   | O   | . TYR TYR TYR B B 406 406 . | 0.1090 | 0.0893 | 0.0827 | -0.0105 | 0.0015  | - |
| 0.0077 | 1   | .   |                             |        |        |        |         |         |   |
| 6425   | N   | N   | . ASN ASN ASN B B 407 407 . | 0.0915 | 0.0903 | 0.0698 | 0.0072  | 0.0046  |   |
| 0.0037 | 1   | .   |                             |        |        |        |         |         |   |
| 6426   | CA  | CA  | . ASN ASN ASN B B 407 407 . | 0.0680 | 0.0740 | 0.0656 | -0.0122 | 0.0020  |   |
| 0.0001 | 1   | .   |                             |        |        |        |         |         |   |
| 6427   | CB  | CB  | . ASN ASN ASN B B 407 407 . | 0.0585 | 0.0901 | 0.0802 | 0.0034  | -0.0067 | - |
| 0.0002 | 1   | .   |                             |        |        |        |         |         |   |
| 6428   | CG  | CG  | . ASN ASN ASN B B 407 407 . | 0.0665 | 0.0729 | 0.0769 | 0.0010  | 0.0174  |   |
| 0.0080 | 1   | .   |                             |        |        |        |         |         |   |
| 6429   | OD1 | OD1 | . ASN ASN ASN B B 407 407 . | 0.0786 | 0.0805 | 0.0807 | 0.0099  | 0.0104  |   |
| 0.0100 | 1   | .   |                             |        |        |        |         |         |   |
| 6430   | ND2 | ND2 | . ASN ASN ASN B B 407 407 . | 0.1093 | 0.0806 | 0.0894 | 0.0096  | -0.0109 | - |
| 0.0010 | 1   | .   |                             |        |        |        |         |         |   |
| 6431   | C   | C   | . ASN ASN ASN B B 407 407 . | 0.0871 | 0.0779 | 0.0710 | -0.0093 | -0.0035 |   |
| 0.0129 | 1   | .   |                             |        |        |        |         |         |   |
| 6432   | O   | O   | . ASN ASN ASN B B 407 407 . | 0.0994 | 0.0784 | 0.0929 | -0.0177 | -0.0082 | - |
| 0.0052 | 1   | .   |                             |        |        |        |         |         |   |
| 6433   | N   | N   | . GLN GLN GLN B B 408 408 . | 0.0716 | 0.0898 | 0.0803 | 0.0067  | 0.0044  |   |
| 0.0105 | 1   | .   |                             |        |        |        |         |         |   |
| 6434   | CA  | CA  | . GLN GLN GLN B B 408 408 . | 0.0779 | 0.0783 | 0.0921 | 0.0172  | -0.0027 | - |
| 0.0117 | 1   | .   |                             |        |        |        |         |         |   |
| 6435   | CB  | CB  | . GLN GLN GLN B B 408 408 . | 0.0709 | 0.0631 | 0.1070 | 0.0229  | -0.0125 |   |
| 0.0080 | 1   | .   |                             |        |        |        |         |         |   |
| 6436   | CG  | CG  | . GLN GLN GLN B B 408 408 . | 0.0878 | 0.1084 | 0.1239 | -0.0197 | -0.0035 |   |
| 0.0337 | 1   | .   |                             |        |        |        |         |         |   |
| 6437   | CD  | CD  | . GLN GLN GLN B B 408 408 . | 0.1135 | 0.1799 | 0.1128 | -0.0015 | 0.0062  |   |
| 0.0455 | 1   | .   |                             |        |        |        |         |         |   |
| 6438   | OE1 | OE1 | . GLN GLN GLN B B 408 408 . | 0.1012 | 0.1675 | 0.1923 | -0.0219 | 0.0037  |   |
| 0.0426 | 1   | .   |                             |        |        |        |         |         |   |
| 6439   | NE2 | NE2 | . GLN GLN GLN B B 408 408 . | 0.1282 | 0.2106 | 0.1632 | -0.0179 | -0.0072 |   |
| 0.0480 | 1   | .   |                             |        |        |        |         |         |   |
| 6440   | C   | C   | . GLN GLN GLN B B 408 408 . | 0.0803 | 0.0901 | 0.0910 | 0.0004  | -0.0065 |   |
| 0.0137 | 1   | .   |                             |        |        |        |         |         |   |
| 6441   | O   | O   | . GLN GLN GLN B B 408 408 . | 0.1116 | 0.0738 | 0.1027 | -0.0178 | -0.0039 |   |
| 0.0175 | 1   | .   |                             |        |        |        |         |         |   |
| 6442   | N   | N   | . LEU LEU LEU B B 409 409 . | 0.0850 | 0.0792 | 0.0688 | -0.0017 | 0.0065  |   |
| 0.0036 | 1   | .   |                             |        |        |        |         |         |   |



|        |     |     |                             |        |        |        |         |         |   |
|--------|-----|-----|-----------------------------|--------|--------|--------|---------|---------|---|
| 6473   | CD  | CD  | . ILE ILE ILE B B 412 412 . | 0.1349 | 0.0853 | 0.1282 | 0.0171  | -0.0065 |   |
| 0.0308 | 1   | .   |                             |        |        |        |         |         |   |
| 6474   | CG2 | CG2 | . ILE ILE ILE B B 412 412 . | 0.1222 | 0.1664 | 0.1407 | -0.0134 | -0.0246 |   |
| 0.0079 | 1   | .   |                             |        |        |        |         |         |   |
| 6475   | C   | C   | . ILE ILE ILE B B 412 412 . | 0.1229 | 0.1168 | 0.1222 | -0.0088 | -0.0031 |   |
| 0.0135 | 1   | .   |                             |        |        |        |         |         |   |
| 6476   | O   | O   | . ILE ILE ILE B B 412 412 . | 0.1377 | 0.1333 | 0.1438 | -0.0515 | -0.0027 | - |
| 0.0083 | 1   | .   |                             |        |        |        |         |         |   |
| 6477   | N   | N   | . GLU GLU GLU B B 413 413 . | 0.1271 | 0.1186 | 0.1032 | 0.0035  | -0.0030 |   |
| 0.0052 | 1   | .   |                             |        |        |        |         |         |   |
| 6478   | CA  | CA  | . GLU GLU GLU B B 413 413 . | 0.1238 | 0.0923 | 0.1198 | -0.0224 | 0.0196  | - |
| 0.0040 | 1   | .   |                             |        |        |        |         |         |   |
| 6479   | CB  | CB  | . GLU GLU GLU B B 413 413 . | 0.1322 | 0.1316 | 0.1221 | -0.0126 | -0.0035 | - |
| 0.0121 | 1   | .   |                             |        |        |        |         |         |   |
| 6480   | CG  | CG  | . GLU GLU GLU B B 413 413 . | 0.1259 | 0.1256 | 0.1441 | -0.0247 | 0.0200  | - |
| 0.0367 | 1   | .   |                             |        |        |        |         |         |   |
| 6481   | CD  | CD  | . GLU GLU GLU B B 413 413 . | 0.1602 | 0.1257 | 0.1539 | -0.0053 | 0.0104  | - |
| 0.0287 | 1   | .   |                             |        |        |        |         |         |   |
| 6482   | OE1 | OE1 | . GLU GLU GLU B B 413 413 . | 0.1482 | 0.1834 | 0.1961 | -0.0290 | -0.0155 |   |
| 0.0102 | 1   | .   |                             |        |        |        |         |         |   |
| 6483   | OE2 | OE2 | . GLU GLU GLU B B 413 413 . | 0.1612 | 0.1646 | 0.1558 | -0.0201 | -0.0154 | - |
| 0.0213 | 1   | .   |                             |        |        |        |         |         |   |
| 6484   | C   | C   | . GLU GLU GLU B B 413 413 . | 0.1606 | 0.1161 | 0.1326 | -0.0232 | -0.0078 |   |
| 0.0126 | 1   | .   |                             |        |        |        |         |         |   |
| 6485   | O   | O   | . GLU GLU GLU B B 413 413 . | 0.1534 | 0.1252 | 0.1213 | -0.0542 | 0.0070  |   |
| 0.0044 | 1   | .   |                             |        |        |        |         |         |   |
| 6486   | N   | N   | . GLU GLU GLU B B 414 414 . | 0.1611 | 0.1067 | 0.1265 | -0.0290 | 0.0016  |   |
| 0.0159 | 1   | .   |                             |        |        |        |         |         |   |
| 6487   | CA  | CA  | . GLU GLU GLU B B 414 414 . | 0.1770 | 0.1028 | 0.1212 | -0.0234 | 0.0074  |   |
| 0.0087 | 1   | .   |                             |        |        |        |         |         |   |
| 6488   | CB  | CB  | . GLU GLU GLU B B 414 414 . | 0.1802 | 0.1030 | 0.1159 | -0.0299 | 0.0131  |   |
| 0.0164 | 1   | .   |                             |        |        |        |         |         |   |
| 6489   | CG  | CG  | . GLU GLU GLU B B 414 414 . | 0.2670 | 0.1668 | 0.1573 | -0.0254 | 0.0183  |   |
| 0.0139 | 1   | .   |                             |        |        |        |         |         |   |
| 6490   | CD  | CD  | . GLU GLU GLU B B 414 414 . | 0.2142 | 0.1805 | 0.1452 | -0.0004 | 0.0029  |   |
| 0.0145 | 1   | .   |                             |        |        |        |         |         |   |
| 6491   | OE1 | OE1 | . GLU GLU GLU B B 414 414 . | 0.2768 | 0.2470 | 0.2323 | 0.0339  | -0.0021 | - |
| 0.0398 | 1   | .   |                             |        |        |        |         |         |   |
| 6492   | OE2 | OE2 | . GLU GLU GLU B B 414 414 . | 0.2611 | 0.2243 | 0.2305 | -0.0006 | -0.0074 |   |
| 0.0070 | 1   | .   |                             |        |        |        |         |         |   |
| 6493   | C   | C   | . GLU GLU GLU B B 414 414 . | 0.1810 | 0.1195 | 0.1454 | -0.0294 | -0.0040 |   |
| 0.0095 | 1   | .   |                             |        |        |        |         |         |   |
| 6494   | O   | O   | . GLU GLU GLU B B 414 414 . | 0.2450 | 0.1458 | 0.1533 | -0.0604 | -0.0178 | - |
| 0.0151 | 1   | .   |                             |        |        |        |         |         |   |
| 6495   | N   | N   | . GLU GLU GLU B B 415 415 . | 0.1551 | 0.1561 | 0.1816 | -0.0477 | 0.0112  | - |
| 0.0043 | 1   | .   |                             |        |        |        |         |         |   |
| 6496   | CA  | CA  | . GLU GLU GLU B B 415 415 . | 0.1826 | 0.1793 | 0.1882 | -0.0458 | 0.0014  | - |
| 0.0210 | 1   | .   |                             |        |        |        |         |         |   |
| 6497   | CB  | CB  | . GLU GLU GLU B B 415 415 . | 0.1865 | 0.1981 | 0.2178 | -0.0394 | 0.0356  | - |
| 0.0091 | 1   | .   |                             |        |        |        |         |         |   |
| 6498   | CG  | CG  | . GLU GLU GLU B B 415 415 . | 0.3200 | 0.4063 | 0.3835 | -0.0297 | -0.0166 | - |
| 0.0281 | 1   | .   |                             |        |        |        |         |         |   |
| 6499   | CD  | CD  | . GLU GLU GLU B B 415 415 . | 0.4764 | 0.5357 | 0.4501 | -0.0778 | -0.0058 | - |
| 0.0109 | 1   | .   |                             |        |        |        |         |         |   |
| 6500   | OE1 | OE1 | . GLU GLU GLU B B 415 415 . | 0.7069 | 0.6603 | 0.4954 | -0.0579 | -0.1097 | - |
| 0.0598 | 1   | .   |                             |        |        |        |         |         |   |
| 6501   | OE2 | OE2 | . GLU GLU GLU B B 415 415 . | 0.4894 | 0.6041 | 0.5914 | -0.1294 | -0.0482 | - |
| 0.0676 | 1   | .   |                             |        |        |        |         |         |   |
| 6502   | C   | C   | . GLU GLU GLU B B 415 415 . | 0.1992 | 0.2117 | 0.1861 | -0.0625 | 0.0042  | - |
| 0.0053 | 1   | .   |                             |        |        |        |         |         |   |



|        |     |     |                             |        |        |        |         |         |   |
|--------|-----|-----|-----------------------------|--------|--------|--------|---------|---------|---|
| 6503   | O   | O   | . GLU GLU GLU B B 415 415 . | 0.2204 | 0.2339 | 0.2275 | -0.0887 | -0.0070 | - |
| 0.0330 | 1   | .   |                             |        |        |        |         |         |   |
| 6504   | N   | N   | . LEU LEU LEU B B 416 416 . | 0.2040 | 0.2068 | 0.1584 | -0.0600 | -0.0034 | - |
| 0.0026 | 1   | .   |                             |        |        |        |         |         |   |
| 6505   | CA  | CA  | . LEU LEU LEU B B 416 416 . | 0.2096 | 0.2035 | 0.1749 | -0.0482 | -0.0354 | - |
| 0.0173 | 1   | .   |                             |        |        |        |         |         |   |
| 6506   | CB  | CB  | . LEU LEU LEU B B 416 416 . | 0.2006 | 0.1964 | 0.1836 | -0.0194 | -0.0338 | - |
| 0.0045 | 1   | .   |                             |        |        |        |         |         |   |
| 6507   | CG  | CG  | . LEU LEU LEU B B 416 416 . | 0.2108 | 0.2205 | 0.1792 | -0.0073 | -0.0278 | - |
| 0.0245 | 1   | .   |                             |        |        |        |         |         |   |
| 6508   | CD1 | CD1 | . LEU LEU LEU B B 416 416 . | 0.2878 | 0.2206 | 0.2133 | 0.0012  | -0.0143 | - |
| 0.0000 | 1   | .   |                             |        |        |        |         |         |   |
| 6509   | CD2 | CD2 | . LEU LEU LEU B B 416 416 . | 0.2129 | 0.2981 | 0.2211 | -0.0223 | 0.0043  | - |
| 0.0346 | 1   | .   |                             |        |        |        |         |         |   |
| 6510   | C   | C   | . LEU LEU LEU B B 416 416 . | 0.2247 | 0.2205 | 0.2004 | -0.0304 | -0.0411 | - |
| 0.0289 | 1   | .   |                             |        |        |        |         |         |   |
| 6511   | O   | O   | . LEU LEU LEU B B 416 416 . | 0.2829 | 0.2641 | 0.2211 | -0.0747 | -0.0784 | - |
| 0.0243 | 1   | .   |                             |        |        |        |         |         |   |
| 6512   | N   | N   | . GLY GLY GLY B B 417 417 . | 0.2606 | 0.2146 | 0.1946 | -0.0315 | -0.0031 | - |
| 0.0255 | 1   | .   |                             |        |        |        |         |         |   |
| 6513   | CA  | CA  | . GLY GLY GLY B B 417 417 . | 0.3274 | 0.2380 | 0.2522 | -0.0301 | -0.0025 | - |
| 0.0272 | 1   | .   |                             |        |        |        |         |         |   |
| 6514   | C   | C   | . GLY GLY GLY B B 417 417 . | 0.3635 | 0.2926 | 0.2842 | -0.0340 | 0.0074  | - |
| 0.0307 | 1   | .   |                             |        |        |        |         |         |   |
| 6515   | O   | O   | . GLY GLY GLY B B 417 417 . | 0.3562 | 0.2818 | 0.2500 | -0.0274 | 0.0289  | - |
| 0.0314 | 1   | .   |                             |        |        |        |         |         |   |
| 6516   | N   | N   | . ASP ASP ASP B B 418 418 . | 0.4125 | 0.3219 | 0.3333 | -0.0491 | -0.0024 | - |
| 0.0332 | 1   | .   |                             |        |        |        |         |         |   |
| 6517   | CA  | CA  | . ASP ASP ASP B B 418 418 . | 0.4298 | 0.3830 | 0.3668 | -0.0494 | -0.0135 | - |
| 0.0344 | 1   | .   |                             |        |        |        |         |         |   |
| 6518   | CB  | CB  | . ASP ASP ASP B B 418 418 . | 0.4536 | 0.3963 | 0.4084 | -0.0532 | -0.0149 | - |
| 0.0444 | 1   | .   |                             |        |        |        |         |         |   |
| 6519   | CG  | CG  | . ASP ASP ASP B B 418 418 . | 0.5192 | 0.5184 | 0.5010 | -0.0227 | 0.0061  | - |
| 0.0362 | 1   | .   |                             |        |        |        |         |         |   |
| 6520   | OD1 | OD1 | . ASP ASP ASP B B 418 418 . | 0.5170 | 0.5866 | 0.6690 | -0.0127 | 0.0452  | - |
| 0.0308 | 1   | .   |                             |        |        |        |         |         |   |
| 6521   | OD2 | OD2 | . ASP ASP ASP B B 418 418 . | 0.5517 | 0.6187 | 0.6385 | -0.0291 | -0.0374 | - |
| 0.0324 | 1   | .   |                             |        |        |        |         |         |   |
| 6522   | C   | C   | . ASP ASP ASP B B 418 418 . | 0.3991 | 0.3815 | 0.3658 | -0.0529 | -0.0133 | - |
| 0.0326 | 1   | .   |                             |        |        |        |         |         |   |
| 6523   | O   | O   | . ASP ASP ASP B B 418 418 . | 0.4323 | 0.4042 | 0.3256 | -0.0758 | -0.0285 | - |
| 0.0431 | 1   | .   |                             |        |        |        |         |         |   |
| 6524   | N   | N   | . GLU GLU GLU B B 419 419 . | 0.3644 | 0.3591 | 0.3586 | -0.0551 | -0.0444 | - |
| 0.0344 | 1   | .   |                             |        |        |        |         |         |   |
| 6525   | CA  | CA  | . GLU GLU GLU B B 419 419 . | 0.3417 | 0.3663 | 0.3562 | -0.0361 | -0.0310 | - |
| 0.0014 | 1   | .   |                             |        |        |        |         |         |   |
| 6526   | CB  | CB  | . GLU GLU GLU B B 419 419 . | 0.3723 | 0.4012 | 0.3869 | -0.0193 | -0.0170 | - |
| 0.0000 | 1   | .   |                             |        |        |        |         |         |   |
| 6527   | CG  | CG  | . GLU GLU GLU B B 419 419 . | 0.4638 | 0.4793 | 0.4870 | -0.0002 | -0.0093 | - |
| 0.0005 | 1   | .   |                             |        |        |        |         |         |   |
| 6528   | CD  | CD  | . GLU GLU GLU B B 419 419 . | 0.5180 | 0.5915 | 0.6001 | -0.0071 | 0.0118  | - |
| 0.0479 | 1   | .   |                             |        |        |        |         |         |   |
| 6529   | OE1 | OE1 | . GLU GLU GLU B B 419 419 . | 0.5853 | 0.5978 | 0.6376 | -0.0826 | 0.0126  | - |
| 0.0452 | 1   | .   |                             |        |        |        |         |         |   |
| 6530   | OE2 | OE2 | . GLU GLU GLU B B 419 419 . | 0.5631 | 0.6171 | 0.5732 | 0.0220  | 0.0010  | - |
| 0.0906 | 1   | .   |                             |        |        |        |         |         |   |
| 6531   | C   | C   | . GLU GLU GLU B B 419 419 . | 0.3263 | 0.3268 | 0.3340 | -0.0231 | -0.0317 | - |
| 0.0176 | 1   | .   |                             |        |        |        |         |         |   |
| 6532   | O   | O   | . GLU GLU GLU B B 419 419 . | 0.2984 | 0.3346 | 0.3466 | -0.0192 | -0.0689 | - |
| 0.0432 | 1   | .   |                             |        |        |        |         |         |   |

|        |     |     |                             |        |        |        |         |         |   |
|--------|-----|-----|-----------------------------|--------|--------|--------|---------|---------|---|
| 6533   | N   | N   | . ALA ALA ALA B B 420 420 . | 0.3086 | 0.2916 | 0.2837 | -0.0385 | -0.0216 |   |
| 0.0127 | 1   | .   |                             |        |        |        |         |         |   |
| 6534   | CA  | CA  | . ALA ALA ALA B B 420 420 . | 0.2728 | 0.2539 | 0.2480 | -0.0255 | 0.0042  | - |
| 0.0005 | 1   | .   |                             |        |        |        |         |         |   |
| 6535   | CB  | CB  | . ALA ALA ALA B B 420 420 . | 0.2766 | 0.2237 | 0.2419 | -0.0282 | 0.0054  | - |
| 0.0160 | 1   | .   |                             |        |        |        |         |         |   |
| 6536   | C   | C   | . ALA ALA ALA B B 420 420 . | 0.2695 | 0.2453 | 0.2340 | -0.0176 | 0.0114  | - |
| 0.0038 | 1   | .   |                             |        |        |        |         |         |   |
| 6537   | O   | O   | . ALA ALA ALA B B 420 420 . | 0.3063 | 0.2504 | 0.2193 | -0.0378 | 0.0104  |   |
| 0.0047 | 1   | .   |                             |        |        |        |         |         |   |
| 6538   | N   | N   | . ARG ARG ARG B B 421 421 . | 0.2100 | 0.2383 | 0.1975 | -0.0337 | 0.0025  | - |
| 0.0232 | 1   | .   |                             |        |        |        |         |         |   |
| 6539   | CA  | CA  | . ARG ARG ARG B B 421 421 . | 0.2201 | 0.2254 | 0.2273 | -0.0486 | 0.0015  | - |
| 0.0064 | 1   | .   |                             |        |        |        |         |         |   |
| 6540   | CB  | CB  | . ARG ARG ARG B B 421 421 . | 0.2399 | 0.2542 | 0.2256 | -0.0679 | -0.0107 | - |
| 0.0018 | 1   | .   |                             |        |        |        |         |         |   |
| 6541   | CG  | CG  | . ARG ARG ARG B B 421 421 . | 0.3048 | 0.3325 | 0.3670 | -0.0990 | 0.0339  | - |
| 0.0354 | 1   | .   |                             |        |        |        |         |         |   |
| 6542   | CD  | CD  | . ARG ARG ARG B B 421 421 . | 0.4467 | 0.5270 | 0.5297 | -0.0262 | 0.0381  | - |
| 0.0315 | 1   | .   |                             |        |        |        |         |         |   |
| 6543   | NE  | NE  | . ARG ARG ARG B B 421 421 . | 0.5560 | 0.6264 | 0.5482 | -0.0349 | 0.0922  | - |
| 0.0237 | 1   | .   |                             |        |        |        |         |         |   |
| 6544   | CZ  | CZ  | . ARG ARG ARG B B 421 421 . | 0.5828 | 0.6400 | 0.5750 | -0.0343 | 0.0805  | - |
| 0.0083 | 1   | .   |                             |        |        |        |         |         |   |
| 6545   | NH1 | NH1 | . ARG ARG ARG B B 421 421 . | 0.5889 | 0.6217 | 0.5348 | -0.0161 | 0.0983  | - |
| 0.0008 | 1   | .   |                             |        |        |        |         |         |   |
| 6546   | NH2 | NH2 | . ARG ARG ARG B B 421 421 . | 0.4833 | 0.6418 | 0.5469 | -0.0268 | 0.1093  |   |
| 0.0283 | 1   | .   |                             |        |        |        |         |         |   |
| 6547   | C   | C   | . ARG ARG ARG B B 421 421 . | 0.1873 | 0.1801 | 0.1853 | -0.0287 | 0.0000  | - |
| 0.0313 | 1   | .   |                             |        |        |        |         |         |   |
| 6548   | O   | O   | . ARG ARG ARG B B 421 421 . | 0.2379 | 0.1972 | 0.2188 | -0.0261 | -0.0004 | - |
| 0.0381 | 1   | .   |                             |        |        |        |         |         |   |
| 6549   | N   | N   | . PHE PHE PHE B B 422 422 . | 0.1669 | 0.1366 | 0.1584 | -0.0443 | 0.0006  | - |
| 0.0081 | 1   | .   |                             |        |        |        |         |         |   |
| 6550   | CA  | CA  | . PHE PHE PHE B B 422 422 . | 0.1597 | 0.1303 | 0.1437 | -0.0313 | -0.0034 | - |
| 0.0147 | 1   | .   |                             |        |        |        |         |         |   |
| 6551   | CB  | CB  | . PHE PHE PHE B B 422 422 . | 0.1646 | 0.1633 | 0.1625 | -0.0186 | 0.0039  | - |
| 0.0116 | 1   | .   |                             |        |        |        |         |         |   |
| 6552   | CG  | CG  | . PHE PHE PHE B B 422 422 . | 0.1665 | 0.0948 | 0.1183 | -0.0156 | 0.0234  |   |
| 0.0002 | 1   | .   |                             |        |        |        |         |         |   |
| 6553   | CD1 | CD1 | . PHE PHE PHE B B 422 422 . | 0.1481 | 0.0860 | 0.1031 | 0.0029  | 0.0216  | - |
| 0.0031 | 1   | .   |                             |        |        |        |         |         |   |
| 6554   | CE1 | CE1 | . PHE PHE PHE B B 422 422 . | 0.1514 | 0.1116 | 0.1179 | 0.0025  | 0.0058  |   |
| 0.0308 | 1   | .   |                             |        |        |        |         |         |   |
| 6555   | CZ  | CZ  | . PHE PHE PHE B B 422 422 . | 0.1686 | 0.1134 | 0.1260 | 0.0046  | 0.0116  |   |
| 0.0146 | 1   | .   |                             |        |        |        |         |         |   |
| 6556   | CE2 | CE2 | . PHE PHE PHE B B 422 422 . | 0.1628 | 0.1592 | 0.1434 | -0.0015 | 0.0003  | - |
| 0.0141 | 1   | .   |                             |        |        |        |         |         |   |
| 6557   | CD2 | CD2 | . PHE PHE PHE B B 422 422 . | 0.1430 | 0.1415 | 0.1433 | 0.0132  | 0.0180  | - |
| 0.0030 | 1   | .   |                             |        |        |        |         |         |   |
| 6558   | C   | C   | . PHE PHE PHE B B 422 422 . | 0.1881 | 0.1358 | 0.1354 | -0.0043 | 0.0061  | - |
| 0.0052 | 1   | .   |                             |        |        |        |         |         |   |
| 6559   | O   | O   | . PHE PHE PHE B B 422 422 . | 0.2156 | 0.1269 | 0.1495 | -0.0151 | 0.0147  | - |
| 0.0047 | 1   | .   |                             |        |        |        |         |         |   |
| 6560   | N   | N   | . ALA ALA ALA B B 423 423 . | 0.1460 | 0.1180 | 0.1143 | -0.0127 | 0.0007  |   |
| 0.0100 | 1   | .   |                             |        |        |        |         |         |   |
| 6561   | CA  | CA  | . ALA ALA ALA B B 423 423 . | 0.1574 | 0.1026 | 0.1025 | -0.0301 | 0.0141  | - |
| 0.0053 | 1   | .   |                             |        |        |        |         |         |   |
| 6562   | CB  | CB  | . ALA ALA ALA B B 423 423 . | 0.1904 | 0.1123 | 0.1385 | -0.0032 | 0.0163  | - |
| 0.0145 | 1   | .   |                             |        |        |        |         |         |   |

|        |     |     |                             |        |        |        |         |         |   |
|--------|-----|-----|-----------------------------|--------|--------|--------|---------|---------|---|
| 6563   | C   | C   | . ALA ALA ALA B B 423 423 . | 0.1552 | 0.1202 | 0.1374 | -0.0139 | 0.0110  | - |
| 0.0095 | 1   | .   |                             |        |        |        |         |         |   |
| 6564   | O   | O   | . ALA ALA ALA B B 423 423 . | 0.1735 | 0.1591 | 0.1134 | -0.0234 | -0.0199 | - |
| 0.0110 | 1   | .   |                             |        |        |        |         |         |   |
| 6565   | N   | N   | . GLY GLY GLY B B 424 424 . | 0.1665 | 0.1231 | 0.1232 | -0.0211 | 0.0112  | - |
| 0.0097 | 1   | .   |                             |        |        |        |         |         |   |
| 6566   | CA  | CA  | . GLY GLY GLY B B 424 424 . | 0.1802 | 0.1100 | 0.1583 | -0.0217 | 0.0159  | - |
| 0.0004 | 1   | .   |                             |        |        |        |         |         |   |
| 6567   | C   | C   | . GLY GLY GLY B B 424 424 . | 0.2321 | 0.1442 | 0.1462 | -0.0156 | 0.0349  | - |
| 0.0050 | 1   | .   |                             |        |        |        |         |         |   |
| 6568   | O   | O   | . GLY GLY GLY B B 424 424 . | 0.2266 | 0.1603 | 0.1582 | -0.0233 | 0.0304  | - |
| 0.0020 | 1   | .   |                             |        |        |        |         |         |   |
| 6569   | N   | N   | . HIS HIS HIS B B 425 425 . | 0.2396 | 0.1809 | 0.1502 | -0.0133 | 0.0521  | - |
| 0.0133 | 1   | .   |                             |        |        |        |         |         |   |
| 6570   | CA  | CA  | . HIS HIS HIS B B 425 425 . | 0.2511 | 0.1799 | 0.1497 | -0.0037 | 0.0454  | - |
| 0.0131 | 1   | .   |                             |        |        |        |         |         |   |
| 6571   | CB  | CB  | . HIS HIS HIS B B 425 425 . | 0.2572 | 0.2134 | 0.1249 | 0.0038  | 0.0453  | - |
| 0.0359 | 1   | .   |                             |        |        |        |         |         |   |
| 6572   | CG  | CG  | . HIS HIS HIS B B 425 425 . | 0.2821 | 0.2467 | 0.1383 | 0.0138  | 0.0472  | - |
| 0.0160 | 1   | .   |                             |        |        |        |         |         |   |
| 6573   | ND1 | ND1 | . HIS HIS HIS B B 425 425 . | 0.3181 | 0.2857 | 0.2203 | 0.0290  | 0.0246  | - |
| 0.0017 | 1   | .   |                             |        |        |        |         |         |   |
| 6574   | CE1 | CE1 | . HIS HIS HIS B B 425 425 . | 0.3232 | 0.3019 | 0.1921 | 0.0222  | 0.0563  | - |
| 0.0096 | 1   | .   |                             |        |        |        |         |         |   |
| 6575   | NE2 | NE2 | . HIS HIS HIS B B 425 425 . | 0.3471 | 0.3146 | 0.1809 | 0.0264  | 0.0419  | - |
| 0.0006 | 1   | .   |                             |        |        |        |         |         |   |
| 6576   | CD2 | CD2 | . HIS HIS HIS B B 425 425 . | 0.2658 | 0.3178 | 0.1375 | 0.0356  | -0.0045 | - |
| 0.0290 | 1   | .   |                             |        |        |        |         |         |   |
| 6577   | C   | C   | . HIS HIS HIS B B 425 425 . | 0.2617 | 0.2133 | 0.1769 | -0.0165 | 0.0245  | - |
| 0.0108 | 1   | .   |                             |        |        |        |         |         |   |
| 6578   | O   | O   | . HIS HIS HIS B B 425 425 . | 0.3199 | 0.2137 | 0.1924 | -0.0172 | 0.0363  | - |
| 0.0084 | 1   | .   |                             |        |        |        |         |         |   |
| 6579   | N   | N   | . ASN ASN ASN B B 426 426 . | 0.2501 | 0.2354 | 0.1832 | 0.0119  | 0.0127  | - |
| 0.0372 | 1   | .   |                             |        |        |        |         |         |   |
| 6580   | CA  | CA  | . ASN ASN ASN B B 426 426 . | 0.2371 | 0.2312 | 0.1897 | -0.0160 | -0.0004 | - |
| 0.0058 | 1   | .   |                             |        |        |        |         |         |   |
| 6581   | CB  | CB  | . ASN ASN ASN B B 426 426 . | 0.2640 | 0.2591 | 0.1975 | -0.0159 | -0.0236 | - |
| 0.0519 | 1   | .   |                             |        |        |        |         |         |   |
| 6582   | CG  | CG  | . ASN ASN ASN B B 426 426 . | 0.3574 | 0.3353 | 0.2465 | -0.0164 | -0.0163 | - |
| 0.0417 | 1   | .   |                             |        |        |        |         |         |   |
| 6583   | OD1 | OD1 | . ASN ASN ASN B B 426 426 . | 0.4398 | 0.5326 | 0.3250 | -0.0383 | 0.0246  | - |
| 0.0354 | 1   | .   |                             |        |        |        |         |         |   |
| 6584   | ND2 | ND2 | . ASN ASN ASN B B 426 426 . | 0.4098 | 0.3650 | 0.3323 | -0.0046 | -0.0383 | - |
| 0.0876 | 1   | .   |                             |        |        |        |         |         |   |
| 6585   | C   | C   | . ASN ASN ASN B B 426 426 . | 0.2017 | 0.1849 | 0.1810 | -0.0145 | 0.0117  | - |
| 0.0107 | 1   | .   |                             |        |        |        |         |         |   |
| 6586   | O   | O   | . ASN ASN ASN B B 426 426 . | 0.2239 | 0.1868 | 0.1896 | -0.0324 | -0.0281 | - |
| 0.0059 | 1   | .   |                             |        |        |        |         |         |   |
| 6587   | N   | N   | . PHE PHE PHE B B 427 427 . | 0.1834 | 0.1529 | 0.1294 | -0.0090 | 0.0018  | - |
| 0.0051 | 1   | .   |                             |        |        |        |         |         |   |
| 6588   | CA  | CA  | . PHE PHE PHE B B 427 427 . | 0.1797 | 0.1379 | 0.1564 | 0.0098  | 0.0026  | - |
| 0.0077 | 1   | .   |                             |        |        |        |         |         |   |
| 6589   | CB  | CB  | . PHE PHE PHE B B 427 427 . | 0.1570 | 0.1575 | 0.1514 | 0.0016  | 0.0136  | - |
| 0.0101 | 1   | .   |                             |        |        |        |         |         |   |
| 6590   | CG  | CG  | . PHE PHE PHE B B 427 427 . | 0.2020 | 0.1680 | 0.1674 | 0.0004  | -0.0144 | - |
| 0.0074 | 1   | .   |                             |        |        |        |         |         |   |
| 6591   | CD1 | CD1 | . PHE PHE PHE B B 427 427 . | 0.2158 | 0.2330 | 0.2386 | -0.0226 | 0.0670  | - |
| 0.0333 | 1   | .   |                             |        |        |        |         |         |   |
| 6592   | CE1 | CE1 | . PHE PHE PHE B B 427 427 . | 0.2621 | 0.2544 | 0.3343 | -0.0222 | 0.0431  | - |
| 0.0397 | 1   | .   |                             |        |        |        |         |         |   |

|        |     |     |                             |        |        |        |         |         |   |
|--------|-----|-----|-----------------------------|--------|--------|--------|---------|---------|---|
| 6593   | CZ  | CZ  | . PHE PHE PHE B B 427 427 . | 0.2080 | 0.2752 | 0.2140 | -0.0423 | 0.0086  |   |
| 0.0683 | 1   | .   |                             |        |        |        |         |         |   |
| 6594   | CE2 | CE2 | . PHE PHE PHE B B 427 427 . | 0.2401 | 0.1999 | 0.2101 | -0.0458 | -0.0250 |   |
| 0.0425 | 1   | .   |                             |        |        |        |         |         |   |
| 6595   | CD2 | CD2 | . PHE PHE PHE B B 427 427 . | 0.2695 | 0.1722 | 0.1757 | -0.0482 | -0.0242 |   |
| 0.0347 | 1   | .   |                             |        |        |        |         |         |   |
| 6596   | C   | C   | . PHE PHE PHE B B 427 427 . | 0.1745 | 0.1340 | 0.1526 | -0.0036 | 0.0254  |   |
| 0.0137 | 1   | .   |                             |        |        |        |         |         |   |
| 6597   | O   | O   | . PHE PHE PHE B B 427 427 . | 0.1719 | 0.1243 | 0.1712 | -0.0226 | -0.0018 | - |
| 0.0003 | 1   | .   |                             |        |        |        |         |         |   |
| 6598   | N   | N   | . ARG ARG ARG B B 428 428 . | 0.1986 | 0.1524 | 0.1781 | -0.0298 | 0.0059  |   |
| 0.0073 | 1   | .   |                             |        |        |        |         |         |   |
| 6599   | CA  | CA  | . ARG ARG ARG B B 428 428 . | 0.1916 | 0.1705 | 0.1704 | -0.0112 | -0.0080 |   |
| 0.0041 | 1   | .   |                             |        |        |        |         |         |   |
| 6600   | CB  | CB  | . ARG ARG ARG B B 428 428 . | 0.2157 | 0.2136 | 0.1971 | -0.0337 | 0.0041  |   |
| 0.0030 | 1   | .   |                             |        |        |        |         |         |   |
| 6601   | CG  | CG  | . ARG ARG ARG B B 428 428 . | 0.1946 | 0.2108 | 0.1841 | -0.0530 | -0.0048 | - |
| 0.0214 | 1   | .   |                             |        |        |        |         |         |   |
| 6602   | CD  | CD  | . ARG ARG ARG B B 428 428 . | 0.2575 | 0.1692 | 0.1433 | -0.0291 | -0.0064 | - |
| 0.0181 | 1   | .   |                             |        |        |        |         |         |   |
| 6603   | NE  | NE  | . ARG ARG ARG B B 428 428 . | 0.2158 | 0.2083 | 0.1816 | -0.0421 | -0.0001 |   |
| 0.0214 | 1   | .   |                             |        |        |        |         |         |   |
| 6604   | CZ  | CZ  | . ARG ARG ARG B B 428 428 . | 0.1984 | 0.1981 | 0.1563 | -0.0121 | -0.0023 | - |
| 0.0106 | 1   | .   |                             |        |        |        |         |         |   |
| 6605   | NH1 | NH1 | . ARG ARG ARG B B 428 428 . | 0.2001 | 0.1306 | 0.1367 | -0.0244 | -0.0204 | - |
| 0.0209 | 1   | .   |                             |        |        |        |         |         |   |
| 6606   | NH2 | NH2 | . ARG ARG ARG B B 428 428 . | 0.2468 | 0.1721 | 0.1587 | -0.0018 | -0.0088 | - |
| 0.0121 | 1   | .   |                             |        |        |        |         |         |   |
| 6607   | C   | C   | . ARG ARG ARG B B 428 428 . | 0.2125 | 0.1790 | 0.2101 | 0.0054  | -0.0180 | - |
| 0.0008 | 1   | .   |                             |        |        |        |         |         |   |
| 6608   | O   | O   | . ARG ARG ARG B B 428 428 . | 0.2697 | 0.2370 | 0.2525 | 0.0355  | -0.0282 | - |
| 0.0383 | 1   | .   |                             |        |        |        |         |         |   |
| 6609   | N   | N   | . ASN ASN ASN B B 429 429 . | 0.2362 | 0.1887 | 0.2035 | -0.0192 | -0.0468 |   |
| 0.0050 | 1   | .   |                             |        |        |        |         |         |   |
| 6610   | CA  | CA  | . ASN ASN ASN B B 429 429 . | 0.2486 | 0.2102 | 0.2011 | -0.0317 | -0.0237 |   |
| 0.0044 | 1   | .   |                             |        |        |        |         |         |   |
| 6611   | CB  | CB  | . ASN ASN ASN B B 429 429 . | 0.2765 | 0.2322 | 0.2355 | -0.0206 | -0.0166 |   |
| 0.0191 | 1   | .   |                             |        |        |        |         |         |   |
| 6612   | CG  | CG  | . ASN ASN ASN B B 429 429 . | 0.2858 | 0.2893 | 0.2528 | -0.0150 | -0.0116 |   |
| 0.0027 | 1   | .   |                             |        |        |        |         |         |   |
| 6613   | OD1 | OD1 | . ASN ASN ASN B B 429 429 . | 0.4360 | 0.3488 | 0.2522 | -0.0767 | 0.0401  | - |
| 0.0013 | 1   | .   |                             |        |        |        |         |         |   |
| 6614   | ND2 | ND2 | . ASN ASN ASN B B 429 429 . | 0.2944 | 0.2346 | 0.2305 | 0.0213  | -0.0126 | - |
| 0.0192 | 1   | .   |                             |        |        |        |         |         |   |
| 6615   | C   | C   | . ASN ASN ASN B B 429 429 . | 0.2680 | 0.2329 | 0.2222 | -0.0324 | -0.0102 | - |
| 0.0136 | 1   | .   |                             |        |        |        |         |         |   |
| 6616   | O   | O   | . ASN ASN ASN B B 429 429 . | 0.3108 | 0.2295 | 0.2238 | -0.0341 | -0.0246 | - |
| 0.0266 | 1   | .   |                             |        |        |        |         |         |   |
| 6617   | N   | N   | . PRO PRO PRO B B 430 430 . | 0.2630 | 0.2214 | 0.2075 | -0.0313 | -0.0093 | - |
| 0.0162 | 1   | .   |                             |        |        |        |         |         |   |
| 6618   | CA  | CA  | . PRO PRO PRO B B 430 430 . | 0.2955 | 0.2742 | 0.2473 | -0.0463 | -0.0080 | - |
| 0.0066 | 1   | .   |                             |        |        |        |         |         |   |
| 6619   | CB  | CB  | . PRO PRO PRO B B 430 430 . | 0.3221 | 0.2705 | 0.2339 | -0.0308 | -0.0060 |   |
| 0.0026 | 1   | .   |                             |        |        |        |         |         |   |
| 6620   | CG  | CG  | . PRO PRO PRO B B 430 430 . | 0.2807 | 0.2760 | 0.1452 | -0.0717 | -0.0327 | - |
| 0.0286 | 1   | .   |                             |        |        |        |         |         |   |
| 6621   | CD  | CD  | . PRO PRO PRO B B 430 430 . | 0.2518 | 0.2586 | 0.2020 | -0.0443 | 0.0049  | - |
| 0.0370 | 1   | .   |                             |        |        |        |         |         |   |
| 6622   | C   | C   | . PRO PRO PRO B B 430 430 . | 0.3082 | 0.2812 | 0.3006 | -0.0528 | -0.0121 |   |
| 0.0063 | 1   | .   |                             |        |        |        |         |         |   |

























```

6953 O      O      . HOH HOH HOH S . 304 304 . 0.2964 0.3334 0.2065 0.0503 -0.0647 -
0.1082 1 .
6954 O      O      . HOH HOH HOH S . 305 305 . 0.1510 0.7225 1.6565 -0.1103 -0.4083
0.7865 1 .
6955 O      O      . HOH HOH HOH S . 306 306 . 0.2865 0.3317 0.4217 0.0965 0.0265 -
0.0364 1 .
6956 O      O      . HOH HOH HOH S . 307 307 . 0.3453 0.3454 0.3446 -0.0001 -0.0324 -
0.0653 1 .
6957 O      O      . HOH HOH HOH S . 308 308 . 0.2938 0.4344 0.2254 0.0042 0.0066 -
0.0131 1 .
6958 O      O      . HOH HOH HOH S . 309 309 . 0.3514 0.2153 0.5348 -0.0058 -0.1237 -
0.0318 1 .
6959 O      O      . HOH HOH HOH S . 310 310 . 0.2686 0.2897 0.3704 -0.0591 0.0056 -
0.1145 1 .
6960 O      O      . HOH HOH HOH S . 311 311 . 0.4841 0.2339 0.3702 0.0942 0.1050
0.0909 1 .
6961 O      O      . HOH HOH HOH S . 312 312 . 0.2364 0.2615 0.2079 0.0101 -0.0251
0.0538 1 .
6962 O      O      . HOH HOH HOH S . 313 313 . 0.3980 0.1475 0.3331 -0.0618 0.0283
0.0285 1 .
6963 O      O      . HOH HOH HOH S . 314 314 . 0.3633 0.3521 0.2341 -0.0753 -0.0256
0.0182 1 .
6964 O      O      . HOH HOH HOH S . 315 315 . 0.3475 0.4263 0.2681 0.0441 0.0402
0.0577 1 .
6965 O      O      . HOH HOH HOH S . 316 316 . 0.3205 0.2866 0.2778 -0.0284 0.0403 -
0.0212 1 .
6966 O      O      . HOH HOH HOH S . 317 317 . 0.3125 0.3022 0.2542 -0.0301 -0.0439 -
0.0573 1 .
6967 O      O      . HOH HOH HOH S . 318 318 . 0.3676 0.3014 0.2957 0.0363 -0.0007 -
0.0915 1 .
6968 O      O      . HOH HOH HOH S . 319 319 . 0.3538 0.2560 0.3677 0.0294 -0.0101
0.0178 1 .
6969 O      O      . HOH HOH HOH S . 320 320 . 0.2733 0.3227 0.2559 -0.0366 -0.0240
0.0045 1 .
6970 O      O      . HOH HOH HOH S . 321 321 . 0.2439 0.3085 0.2391 0.0198 0.0487
0.0205 1 .
6971 O      O      . HOH HOH HOH S . 322 322 . 0.2270 0.3061 0.3129 0.1052 -0.0400
0.0582 1 .
6972 O      O      . HOH HOH HOH S . 323 323 . 0.3971 0.4566 0.4491 0.0290 -0.0102 -
0.0767 1 .
6973 O      O      . HOH HOH HOH S . 324 324 . 0.3298 0.3197 0.2986 -0.0442 0.0034
0.0388 1 .
6974 O      O      . HOH HOH HOH S . 325 325 . 0.2669 0.3120 0.3241 -0.0304 -0.0547
0.1500 1 .
6975 O      O      . HOH HOH HOH S . 326 326 . 0.2785 0.3384 0.3147 -0.0163 -0.0139 -
0.0449 1 .

```

```

#
_atom_sites.entry_id      UNNAMED
_atom_sites.fract_transf_matrix[1][1]  0.009460
_atom_sites.fract_transf_matrix[1][2]  0.000000
_atom_sites.fract_transf_matrix[1][3]  0.000000
_atom_sites.fract_transf_matrix[2][1]  0.000000
_atom_sites.fract_transf_matrix[2][2]  0.008430
_atom_sites.fract_transf_matrix[2][3]  0.000000
_atom_sites.fract_transf_matrix[3][1]  0.000000
_atom_sites.fract_transf_matrix[3][2]  0.000000
_atom_sites.fract_transf_matrix[3][3]  0.014797
_atom_sites.fract_transf_vector[1]     0.000000
_atom_sites.fract_transf_vector[2]     0.000000
_atom_sites.fract_transf_vector[3]     0.000000

```



```

#
_cell.length_a      105.708
_cell.length_b      118.623
_cell.length_c       67.579
_cell.angle_alpha   90.000
_cell.angle_beta    90.000
_cell.angle_gamma   90.000
_cell.entry_id      UNNAMED
#
_computing.entry_id          UNNAMED
_computing.structure_refinement  'REFMAC 5.5.0109'
_computing.structure_solution   ?
_computing.pdbx_data_reduction_ds  HKL
_computing.pdbx_data_reduction_ii  HKL
_computing.cell_refinement        HKL
#
_data_extraction.software        pdb_extract
_data_extraction.extraction_date  'Fri Oct 21 12:10:52 2011'
_data_extraction.version         3.10
_data_extraction.release_date     'June 10, 2010'
_data_extraction.location         http://sw-tools.rcsb.org/apps/PDB_EXTRACT/
#
loop_
_database_2.database_id
_database_2.database_code
PDB UNNAMED
RCSB UNNAMED
#
_database_PDB_remark.id      3
_database_PDB_remark.text
;
REMARK 3
REMARK 3 REFINEMENT.
REMARK 3 PROGRAM : REFMAC 5.5.0109
REMARK 3 AUTHORS : MURSHUDOV,VAGIN,DODSON
REMARK 3
REMARK 3 REFINEMENT TARGET : MAXIMUM LIKELIHOOD
REMARK 3
REMARK 3 DATA USED IN REFINEMENT.
REMARK 3 RESOLUTION RANGE HIGH (ANGSTROMS) : 1.41
REMARK 3 RESOLUTION RANGE LOW (ANGSTROMS) : 78.92
REMARK 3 DATA CUTOFF (SIGMA(F)) : NONE
REMARK 3 COMPLETENESS FOR RANGE (%) : 94.05
REMARK 3 NUMBER OF REFLECTIONS : 145027
REMARK 3
REMARK 3 FIT TO DATA USED IN REFINEMENT.
REMARK 3 CROSS-VALIDATION METHOD : THROUGHOUT
REMARK 3 FREE R VALUE TEST SET SELECTION : RANDOM
REMARK 3 R VALUE (WORKING + TEST SET) : 0.16321
REMARK 3 R VALUE (WORKING SET) : 0.16144
REMARK 3 FREE R VALUE : 0.19730
REMARK 3 FREE R VALUE TEST SET SIZE (%) : 5.0
REMARK 3 FREE R VALUE TEST SET COUNT : 7677
REMARK 3
REMARK 3 FIT IN THE HIGHEST RESOLUTION BIN.
REMARK 3 TOTAL NUMBER OF BINS USED : 20
REMARK 3 BIN RESOLUTION RANGE HIGH : 1.414
REMARK 3 BIN RESOLUTION RANGE LOW : 1.450
REMARK 3 REFLECTION IN BIN (WORKING SET) : 5532
REMARK 3 BIN COMPLETENESS (WORKING+TEST) (%) : 49.70

```

REMARK 3 BIN R VALUE (WORKING SET) : 0.327  
REMARK 3 BIN FREE R VALUE SET COUNT : 312  
REMARK 3 BIN FREE R VALUE : 0.382  
REMARK 3  
REMARK 3 NUMBER OF NON-HYDROGEN ATOMS USED IN REFINEMENT.  
REMARK 3 ALL ATOMS : 6980  
REMARK 3  
REMARK 3 B VALUES.  
REMARK 3 FROM WILSON PLOT (A\*\*2) : NULL  
REMARK 3 MEAN B VALUE (OVERALL, A\*\*2) : 13.184  
REMARK 3 OVERALL ANISOTROPIC B VALUE.  
REMARK 3 B11 (A\*\*2) : 0.36  
REMARK 3 B22 (A\*\*2) : -0.32  
REMARK 3 B33 (A\*\*2) : -0.04  
REMARK 3 B12 (A\*\*2) : 0.00  
REMARK 3 B13 (A\*\*2) : 0.00  
REMARK 3 B23 (A\*\*2) : 0.00  
REMARK 3  
REMARK 3 ESTIMATED OVERALL COORDINATE ERROR.  
REMARK 3 ESU BASED ON R VALUE (A) : 0.069  
REMARK 3 ESU BASED ON FREE R VALUE (A) : 0.064  
REMARK 3 ESU BASED ON MAXIMUM LIKELIHOOD (A) : 0.036  
REMARK 3 ESU FOR B VALUES BASED ON MAXIMUM LIKELIHOOD (A\*\*2) : 2.019  
REMARK 3  
REMARK 3 CORRELATION COEFFICIENTS.  
REMARK 3 CORRELATION COEFFICIENT FO-FC : 0.964  
REMARK 3 CORRELATION COEFFICIENT FO-FC FREE : 0.951  
REMARK 3  
REMARK 3 RMS DEVIATIONS FROM IDEAL VALUES COUNT RMS WEIGHT  
REMARK 3 BOND LENGTHS REFINED ATOMS (A) : 6754 ; 0.026 ; 0.022  
REMARK 3 BOND ANGLES REFINED ATOMS (DEGREES) : 9139 ; 2.131 ; 1.970  
REMARK 3 TORSION ANGLES, PERIOD 1 (DEGREES) : 864 ; 6.017 ; 5.000  
REMARK 3 TORSION ANGLES, PERIOD 2 (DEGREES) : 308 ; 40.444 ; 25.000  
REMARK 3 TORSION ANGLES, PERIOD 3 (DEGREES) : 1162 ; 13.968 ; 15.000  
REMARK 3 TORSION ANGLES, PERIOD 4 (DEGREES) : 40 ; 21.789 ; 15.000  
REMARK 3 CHIRAL-CENTER RESTRAINTS (A\*\*3) : 1025 ; 0.159 ; 0.200  
REMARK 3 GENERAL PLANES REFINED ATOMS (A) : 5116 ; 0.013 ; 0.021  
REMARK 3  
REMARK 3 ISOTROPIC THERMAL FACTOR RESTRAINTS. COUNT RMS WEIGHT  
REMARK 3 MAIN-CHAIN BOND REFINED ATOMS (A\*\*2) : 4280 ; 2.275 ; 1.500  
REMARK 3 MAIN-CHAIN ANGLE REFINED ATOMS (A\*\*2) : 6843 ; 3.192 ; 2.000  
REMARK 3 SIDE-CHAIN BOND REFINED ATOMS (A\*\*2) : 2474 ; 5.146 ; 3.000  
REMARK 3 SIDE-CHAIN ANGLE REFINED ATOMS (A\*\*2) : 2296 ; 7.670 ; 4.500  
REMARK 3  
REMARK 3 ANISOTROPIC THERMAL FACTOR RESTRAINTS. COUNT RMS WEIGHT  
REMARK 3 RIGID-BOND RESTRAINTS (A\*\*2) : 6754 ; 2.761 ; 3.000  
REMARK 3  
REMARK 3 NCS RESTRAINTS STATISTICS  
REMARK 3 NUMBER OF NCS GROUPS : NULL  
REMARK 3  
REMARK 3 TWIN DETAILS  
REMARK 3 NUMBER OF TWIN DOMAINS : NULL  
REMARK 3  
REMARK 3  
REMARK 3 TLS DETAILS  
REMARK 3 NUMBER OF TLS GROUPS : NULL  
REMARK 3  
REMARK 3  
REMARK 3 BULK SOLVENT MODELLING.  
REMARK 3 METHOD USED : MASK

```

REMARK 3 PARAMETERS FOR MASK CALCULATION
REMARK 3 VDW PROBE RADIUS : 1.40
REMARK 3 ION PROBE RADIUS : 0.80
REMARK 3 SHRINKAGE RADIUS : 0.80
REMARK 3
REMARK 3 OTHER REFINEMENT REMARKS:
REMARK 3 HYDROGENS HAVE BEEN ADDED IN THE RIDING POSITIONS
REMARK 3 U VALUES : REFINED INDIVIDUALLY
REMARK 3

```

```

;
#
_entity_poly.entity_id 1
_entity_poly.pdbx_seq_one_letter_code
;SIQKIWAREILDSRGNPTVEVDLYTAKGLFRAAVPSGASTGIYEALELRDGDQRYLGKG
VLKAVDHNSTIAPALISSGLSVVEQEKLDNLMLELDGTENKSKFGANAILGVSLAVCKA
GAAERELPLYRHIAQLAGNSDLILPVPAFNIVINGGSHAGNKLAMQEFMILPVGAEFRDA
MRLGAEVYHTLKGVIKDKYGKDATNVGDEGGFAPNILENSEALELVKEAIDKAGYTEKIV
IGMDVAASEFYRDGKYDLDFKSPTDPSRYITGDQLGALYQDFVRDYPVVSIEDPFDQDDW
AAWSKFTANVGIQIVGDDLTVTNPKRIERAVEREAKACNCLLLKVNQIGSVTEAIQACKLAQ
ENGGWVMVSHRSGETEDTFIADLVVGLCTGQIKTGAPCRSERLAKYNQLMRIEELGDEA
RFAGHNFRNPSVL

```

```

;
_entity_poly.pdbx_strand_id A,B
_entity_poly.type 'polypeptide(L)'
_entity_poly.pdbx_target_identifier ?
#

```

```

_entry.id UNNAMED
#

```

```

_exptl.crystals_number 1
_exptl.entry_id UNNAMED
_exptl.method 'X-RAY DIFFRACTION'
#

```

```

_exptl_crystal.id 1
_exptl_crystal.pdbx_mosaicity 0.523
_exptl_crystal.pdbx_mosaicity_esd ?
_exptl_crystal.density_Matthews ?
_exptl_crystal.density_diffn ?
_exptl_crystal.density_meas ?
_exptl_crystal.density_meas_temp ?
_exptl_crystal.density_percent_sol ?
_exptl_crystal.size_max ?
_exptl_crystal.size_mid ?
_exptl_crystal.size_min ?
_exptl_crystal.size_rad ?
#

```

```

_refine.entry_id UNNAMED
_refine.pdbx_refine_id 'X-RAY DIFFRACTION'
_refine.ls_d_res_high 1.4100
_refine.ls_d_res_low 78.9200
_refine.pdbx_ls_sigma_F 0.000
_refine.pdbx_data_cutoff_high_absF ?
_refine.pdbx_data_cutoff_low_absF ?
_refine.ls_percent_reflns_obs 94.0500
_refine.ls_number_reflns_obs 152704
_refine.ls_number_reflns_all ?
_refine.pdbx_ls_cross_valid_method THROUGHOUT
_refine.ls_matrix_type ?
_refine.pdbx_R_Free_selection_details RANDOM
_refine.details

```

```

' HYDROGENS HAVE BEEN ADDED IN THE RIDING POSITIONS U VALUES      : REFINED
INDIVIDUALLY '
_refine.ls_R_factor_all                ?
_refine.ls_R_factor_obs                0.1632
_refine.ls_R_factor_R_work            0.1614
_refine.ls_wR_factor_R_work           0.1530
_refine.ls_R_factor_R_free            0.1973
_refine.ls_wR_factor_R_free           0.1790
_refine.ls_percent_reflns_R_free      5.0000
_refine.ls_number_reflns_R_free       7677
_refine.ls_number_reflns_R_work       145027
_refine.ls_R_factor_R_free_error      ?
_refine.B_iso_mean                    13.1624
_refine.solvent_model_param_bsol      ?
_refine.solvent_model_param_ksol      ?
_refine.pdbx_isotropic_thermal_model  ?
_refine.aniso_B[1][1]                 0.3600
_refine.aniso_B[2][2]                 -0.3200
_refine.aniso_B[3][3]                 -0.0400
_refine.aniso_B[1][2]                 0.0000
_refine.aniso_B[1][3]                 0.0000
_refine.aniso_B[2][3]                 0.0000
_refine.correlation_coeff_Fo_to_Fc    0.9640
_refine.correlation_coeff_Fo_to_Fc_free 0.9510
_refine.overall_SU_R_Cruickshank_DPI  0.0690
_refine.pdbx_overall_SU_R_free_Cruickshank_DPI ?
_refine.pdbx_overall_SU_R_Blow_DPI    ?
_refine.pdbx_overall_SU_R_free_Blow_DPI ?
_refine.overall_SU_R_free             0.0635
_refine.pdbx_overall_ESU_R            0.0690
_refine.pdbx_overall_ESU_R_Free       0.0640
_refine.overall_SU_ML                 0.0360
_refine.overall_SU_B                  2.0190
_refine.solvent_model_details         MASK
_refine.pdbx_solvent_vdw_probe_radii  1.4000
_refine.pdbx_solvent_ion_probe_radii  0.8000
_refine.pdbx_solvent_shrinkage_radii  0.8000
_refine.ls_number_parameters          ?
_refine.ls_number_restraints          ?
_refine.pdbx_starting_model           ?
_refine.pdbx_method_to_determine_struct ?
_refine.pdbx_stereochemistry_target_values 'MAXIMUM LIKELIHOOD'
_refine.pdbx_stereochem_target_val_spec_case ?
_refine.overall_FOM_work_R_set        0.9010
_refine.B_iso_max                     258.630
_refine.B_iso_min                     4.380
_refine.pdbx_overall_phase_error      ?
_refine.occupancy_max                 1.000
_refine.occupancy_min                 1.000
#
loop_
_refine_ls_restr.pdbx_refine_id
_refine_ls_restr.type
_refine_ls_restr.number
_refine_ls_restr.dev_ideal
_refine_ls_restr.dev_ideal_target
_refine_ls_restr.weight
_refine_ls_restr.pdbx_restraint_function
'X-RAY DIFFRACTION' r_bond_refined_d    6754 0.026  0.022  ? ?
'X-RAY DIFFRACTION' r_angle_refined_deg  9139 2.131  1.970  ? ?

```

|                     |                                                 |          |                     |        |    |
|---------------------|-------------------------------------------------|----------|---------------------|--------|----|
| 'X-RAY DIFFRACTION' | r_dihedral_angle_1_deg                          | 864      | 6.017               | 5.000  | ?? |
| 'X-RAY DIFFRACTION' | r_dihedral_angle_2_deg                          | 308      | 40.444              | 25.000 | ?? |
| 'X-RAY DIFFRACTION' | r_dihedral_angle_3_deg                          | 1162     | 13.968              | 15.000 | ?? |
| 'X-RAY DIFFRACTION' | r_dihedral_angle_4_deg                          | 40       | 21.789              | 15.000 | ?? |
| 'X-RAY DIFFRACTION' | r_chiral_restr                                  | 1025     | 0.159               | 0.200  | ?? |
| 'X-RAY DIFFRACTION' | r_gen_planes_refined                            | 5116     | 0.013               | 0.021  | ?? |
| 'X-RAY DIFFRACTION' | r_mcbond_it                                     | 4280     | 2.275               | 1.500  | ?? |
| 'X-RAY DIFFRACTION' | r_mcbond_it                                     | 6843     | 3.192               | 2.000  | ?? |
| 'X-RAY DIFFRACTION' | r_scbond_it                                     | 2474     | 5.146               | 3.000  | ?? |
| 'X-RAY DIFFRACTION' | r_scangle_it                                    | 2296     | 7.670               | 4.500  | ?? |
| 'X-RAY DIFFRACTION' | r_rigid_bond_restr                              | 6754     | 2.761               | 3.000  | ?? |
| #                   |                                                 |          |                     |        |    |
|                     | _refine_ls_shell.d_res_high                     |          | 1.4140              |        |    |
|                     | _refine_ls_shell.d_res_low                      |          | 1.4500              |        |    |
|                     | _refine_ls_shell.pdbx_total_number_of_bins_used |          | 20                  |        |    |
|                     | _refine_ls_shell.percent_reflns_obs             |          | 49.7000             |        |    |
|                     | _refine_ls_shell.number_reflns_R_work           |          | 5532                |        |    |
|                     | _refine_ls_shell.R_factor_all                   |          | ?                   |        |    |
|                     | _refine_ls_shell.R_factor_R_work                |          | 0.3270              |        |    |
|                     | _refine_ls_shell.R_factor_R_free                |          | 0.3820              |        |    |
|                     | _refine_ls_shell.percent_reflns_R_free          |          | ?                   |        |    |
|                     | _refine_ls_shell.number_reflns_R_free           |          | 312                 |        |    |
|                     | _refine_ls_shell.R_factor_R_free_error          |          | ?                   |        |    |
|                     | _refine_ls_shell.number_reflns_all              |          | 5844                |        |    |
|                     | _refine_ls_shell.number_reflns_obs              |          | ?                   |        |    |
|                     | _refine_ls_shell.pdbx_refine_id                 |          | 'X-RAY DIFFRACTION' |        |    |
| #                   |                                                 |          |                     |        |    |
|                     | _reflns.entry_id                                | UNNAMED  |                     |        |    |
|                     | _reflns.d_resolution_high                       | 1.410    |                     |        |    |
|                     | _reflns.d_resolution_low                        | 50.000   |                     |        |    |
|                     | _reflns.pdbx_number_measured_all                | 959533   |                     |        |    |
|                     | _reflns.number_obs                              | 153055   |                     |        |    |
|                     | _reflns.pdbx_Rmerge_I_obs                       | 0.067    |                     |        |    |
|                     | _reflns.pdbx_netI_over_av_sigmaI                | 21.307   |                     |        |    |
|                     | _reflns.pdbx_netI_over_sigmaI                   | 9.600    |                     |        |    |
|                     | _reflns.pdbx_chi_squared                        | 0.824    |                     |        |    |
|                     | _reflns.pdbx_redundancy                         | 6.300    |                     |        |    |
|                     | _reflns.percent_possible_obs                    | 94.300   |                     |        |    |
|                     | _reflns.pdbx_Rmeas_mean                         | 0.067    |                     |        |    |
|                     | _reflns.pdbx_average_I_obs                      | 2086.000 |                     |        |    |
|                     | _reflns.pdbx_average_sigmaI_obs                 | 97.900   |                     |        |    |
| #                   |                                                 |          |                     |        |    |
| loop_               |                                                 |          |                     |        |    |
|                     | _reflns_shell.d_res_high                        |          |                     |        |    |
|                     | _reflns_shell.d_res_low                         |          |                     |        |    |
|                     | _reflns_shell.number_measured_obs               |          |                     |        |    |
|                     | _reflns_shell.number_measured_all               |          |                     |        |    |
|                     | _reflns_shell.number_unique_obs                 |          |                     |        |    |
|                     | _reflns_shell.pdbx_rejects                      |          |                     |        |    |
|                     | _reflns_shell.Rmerge_I_obs                      |          |                     |        |    |
|                     | _reflns_shell.meanI_over_sigI_obs               |          |                     |        |    |
|                     | _reflns_shell.pdbx_Rsym_value                   |          |                     |        |    |
|                     | _reflns_shell.pdbx_chi_squared                  |          |                     |        |    |
|                     | _reflns_shell.pdbx_redundancy                   |          |                     |        |    |
|                     | _reflns_shell.percent_possible_obs              |          |                     |        |    |
|                     | _reflns_shell.pdbx_Rmeas_mean                   |          |                     |        |    |
|                     | _reflns_shell.pdbx_netI_over_sigmaI_obs         |          |                     |        |    |
|                     | _reflns_shell.pdbx_number_centric               |          |                     |        |    |
|                     | _reflns_shell.pdbx_number_anomalous             |          |                     |        |    |
|                     | _reflns_shell.pdbx_Rmerge_I_anomalous           |          |                     |        |    |

```

_reflns_shell.pdbx_meanI_over_sigI_anomalous
_reflns_shell.pdbx_PCV_mean
_reflns_shell.number_possible
_reflns_shell.number_unique_all
_reflns_shell.Rmerge_F_all
_reflns_shell.Rmerge_F_obs
_reflns_shell.Rmerge_I_all
_reflns_shell.meanI_over_sigI_all
_reflns_shell.percent_possible_all
_reflns_shell.pdbx_Rrim_I_all
_reflns_shell.pdbx_Rpim_I_all
1.410 1.460 ? ? ? ? 0.554 ? ? 0.601 2.300 ? ? ? ? ? ? ? ? ? ? 9215 ? ? ? ? 57.500 ?
?
1.460 1.520 ? ? ? ? 0.483 ? ? 0.621 3.800 ? ? ? ? ? ? ? ? ? ? 14496 ? ? ? ? 90.400 ?
?
1.520 1.590 ? ? ? ? 0.398 ? ? 0.642 5.600 ? ? ? ? ? ? ? ? ? ? 15758 ? ? ? ? 97.900 ?
?
1.590 1.670 ? ? ? ? 0.300 ? ? 0.658 6.400 ? ? ? ? ? ? ? ? ? ? 15895 ? ? ? ? 98.800 ?
?
1.670 1.780 ? ? ? ? 0.223 ? ? 0.660 6.700 ? ? ? ? ? ? ? ? ? ? 16006 ? ? ? ? 99.200 ?
?
1.780 1.910 ? ? ? ? 0.149 ? ? 0.677 7.000 ? ? ? ? ? ? ? ? ? ? 16078 ? ? ? ? 99.500 ?
?
1.910 2.110 ? ? ? ? 0.091 ? ? 0.717 7.200 ? ? ? ? ? ? ? ? ? ? 16152 ? ? ? ? 99.700 ?
?
2.110 2.410 ? ? ? ? 0.064 ? ? 0.857 7.300 ? ? ? ? ? ? ? ? ? ? 16245 ? ? ? ? 99.900 ?
?
2.410 3.040 ? ? ? ? 0.053 ? ? 1.236 7.300 ? ? ? ? ? ? ? ? ? ? 16370 ? ? ? ? 100.000 ?
?
3.040 50.000 ? ? ? ? 0.030 ? ? 1.146 7.100 ? ? ? ? ? ? ? ? ? ? 16840 ? ? ? ? 99.900 ?
?
#
loop_
_software.pdbx_ordinal
_software.name
_software.version
_software.date
_software.type
_software.contact_author
_software.contact_author_email
_software.classification
_software.location
_software.language
1 HKL ? ? package 'Zbyszek Otwinowski' hkl@hkl-xray.com
'data reduction' http://www.hkl-xray.com/ ?
2 REFMAC5 ? ? program 'Garib N. Murshudov' garib@ysbl.york.ac.uk
refinement http://www.ccp4.ac.uk/dist/html/refmac5.html Fortran_77
3 pdb_extract 3.10 'June 10, 2010' package PDB
deposit@deposit.rcsb.org
'data extraction' http://sw-tools.pdb.org/apps/PDB_EXTRACT/ C++
#
_struct_biol.id 1
_struct_biol.details ?
#
_symmetry.space_group_name_H-M 'P 21 21 2'
_symmetry.entry_id UNNAMED
_symmetry.Int_Tables_number 18
#

```



































































































































































































































































































































































































































































































































































```

ATOM 7249 O O . HOH HOH HOH S . 603 603 . 75.482 85.657 33.928 1.00 30.21 1
. .
ATOM 7250 O O . HOH HOH HOH S . 605 605 . 69.752 105.869 22.065 1.00 25.18 1
. .
ATOM 7251 O O . HOH HOH HOH S . 606 606 . 86.991 126.721 0.880 1.00 29.71 1
. .
ATOM 7252 O O . HOH HOH HOH S . 609 609 . 82.466 114.175 21.857 1.00 39.35 1
. .
ATOM 7253 O O . HOH HOH HOH S . 610 610 . 96.523 106.702 -20.892 1.00 33.52 1
. .
ATOM 7254 O O . HOH HOH HOH S . 613 613 . 88.298 81.611 4.017 1.00 30.74 1
. .
ATOM 7255 O O . HOH HOH HOH S . 615 615 . 101.510 102.123 45.474 1.00 26.37 1
. .

```

#

loop\_

```

_atom_site_anisotrop.id
_atom_site_anisotrop.pdbx_auth_atom_id
_atom_site_anisotrop.pdbx_label_atom_id
_atom_site_anisotrop.pdbx_label_alt_id
_atom_site_anisotrop.pdbx_auth_comp_id
_atom_site_anisotrop.pdbx_label_comp_id
_atom_site_anisotrop.pdbx_orig_comp_id
_atom_site_anisotrop.pdbx_auth_asym_id
_atom_site_anisotrop.pdbx_label_asym_id
_atom_site_anisotrop.pdbx_auth_seq_id
_atom_site_anisotrop.pdbx_label_seq_id
_atom_site_anisotrop.pdbx_PDB_ins_code
_atom_site_anisotrop.U[1][1]
_atom_site_anisotrop.U[2][2]
_atom_site_anisotrop.U[3][3]
_atom_site_anisotrop.U[1][2]
_atom_site_anisotrop.U[1][3]
_atom_site_anisotrop.U[2][3]
_atom_site_anisotrop.pdbx_PDB_model_num
_atom_site_anisotrop.type_symbol
1 N N . SER SER SER A A 1 1 . 0.2093 0.1934 0.2005 0.0220 0.0060 -
0.0014 1 .
2 CA CA . SER SER SER A A 1 1 . 0.1864 0.1992 0.1906 -0.0104 0.0039
0.0001 1 .
3 CB CB . SER SER SER A A 1 1 . 0.2188 0.2112 0.1985 -0.0070 0.0010
0.0092 1 .
4 OG OG . SER SER SER A A 1 1 . 0.2008 0.2526 0.2458 -0.0645 -0.0087 -
0.0159 1 .
5 C C . SER SER SER A A 1 1 . 0.1689 0.1576 0.1708 0.0023 0.0028
0.0029 1 .
6 O O . SER SER SER A A 1 1 . 0.1958 0.1984 0.1838 0.0127 -0.0096
0.0180 1 .
7 N N . ILE ILE ILE A A 2 2 . 0.0929 0.0844 0.0991 -0.0045 0.0119 -
0.0001 1 .
8 CA CA . ILE ILE ILE A A 2 2 . 0.0763 0.0807 0.0867 -0.0040 -0.0016
0.0018 1 .
9 CB CB . ILE ILE ILE A A 2 2 . 0.0402 0.0531 0.0474 -0.0007 -0.0040 -
0.0110 1 .
10 CG1 CG1 . ILE ILE ILE A A 2 2 . 0.0454 0.0686 0.0557 -0.0036 -0.0130 -
0.0266 1 .
11 CD1 CD1 . ILE ILE ILE A A 2 2 . 0.0406 0.0744 0.0452 0.0007 -0.0029
0.0008 1 .
12 CG2 CG2 . ILE ILE ILE A A 2 2 . 0.0428 0.0487 0.0308 -0.0179 -0.0041 -
0.0004 1 .

```











































































|        |     |     |                             |        |        |        |         |         |   |
|--------|-----|-----|-----------------------------|--------|--------|--------|---------|---------|---|
| 1003   | CD1 | CD1 | . ILE ILE ILE A A 133 133 . | 0.0586 | 0.0289 | 0.0436 | -0.0045 | 0.0155  |   |
| 0.0037 | 1   | .   |                             |        |        |        |         |         |   |
| 1004   | CG2 | CG2 | . ILE ILE ILE A A 133 133 . | 0.0253 | 0.0254 | 0.0254 | 0.0000  | 0.0000  |   |
| 0.0001 | 1   | .   |                             |        |        |        |         |         |   |
| 1005   | C   | C   | . ILE ILE ILE A A 133 133 . | 0.0253 | 0.0253 | 0.0253 | 0.0000  | 0.0000  |   |
| 0.0000 | 1   | .   |                             |        |        |        |         |         |   |
| 1006   | O   | O   | . ILE ILE ILE A A 133 133 . | 0.0283 | 0.0283 | 0.0274 | 0.0029  | 0.0025  |   |
| 0.0025 | 1   | .   |                             |        |        |        |         |         |   |
| 1007   | N   | N   | . ALA ALA ALA A A 134 134 . | 0.0255 | 0.0262 | 0.0257 | -0.0003 | 0.0002  | - |
| 0.0005 | 1   | .   |                             |        |        |        |         |         |   |
| 1008   | CA  | CA  | . ALA ALA ALA A A 134 134 . | 0.0329 | 0.0281 | 0.0266 | -0.0046 | 0.0032  | - |
| 0.0019 | 1   | .   |                             |        |        |        |         |         |   |
| 1009   | CB  | CB  | . ALA ALA ALA A A 134 134 . | 0.0300 | 0.0288 | 0.0330 | 0.0040  | 0.0060  |   |
| 0.0051 | 1   | .   |                             |        |        |        |         |         |   |
| 1010   | C   | C   | . ALA ALA ALA A A 134 134 . | 0.0456 | 0.0483 | 0.0398 | -0.0071 | 0.0088  | - |
| 0.0007 | 1   | .   |                             |        |        |        |         |         |   |
| 1011   | O   | O   | . ALA ALA ALA A A 134 134 . | 0.0496 | 0.0482 | 0.0496 | 0.0013  | 0.0085  |   |
| 0.0162 | 1   | .   |                             |        |        |        |         |         |   |
| 1012   | N   | N   | . GLN GLN GLN A A 135 135 . | 0.0393 | 0.0516 | 0.0351 | -0.0091 | 0.0065  |   |
| 0.0073 | 1   | .   |                             |        |        |        |         |         |   |
| 1013   | CA  | CA  | . GLN GLN GLN A A 135 135 . | 0.0602 | 0.0535 | 0.0504 | -0.0129 | 0.0075  |   |
| 0.0102 | 1   | .   |                             |        |        |        |         |         |   |
| 1014   | CB  | CB  | . GLN GLN GLN A A 135 135 . | 0.0640 | 0.0763 | 0.0518 | -0.0160 | 0.0136  |   |
| 0.0014 | 1   | .   |                             |        |        |        |         |         |   |
| 1015   | CG  | CG  | . GLN GLN GLN A A 135 135 . | 0.1119 | 0.0878 | 0.0955 | -0.0077 | -0.0103 |   |
| 0.0000 | 1   | .   |                             |        |        |        |         |         |   |
| 1016   | CD  | CD  | . GLN GLN GLN A A 135 135 . | 0.1498 | 0.1649 | 0.1919 | -0.0065 | 0.0150  | - |
| 0.0059 | 1   | .   |                             |        |        |        |         |         |   |
| 1017   | OE1 | OE1 | . GLN GLN GLN A A 135 135 . | 0.2128 | 0.1690 | 0.2036 | -0.0131 | -0.0041 |   |
| 0.0280 | 1   | .   |                             |        |        |        |         |         |   |
| 1018   | NE2 | NE2 | . GLN GLN GLN A A 135 135 . | 0.1203 | 0.1843 | 0.1416 | -0.0287 | 0.0075  | - |
| 0.0275 | 1   | .   |                             |        |        |        |         |         |   |
| 1019   | C   | C   | . GLN GLN GLN A A 135 135 . | 0.0484 | 0.0422 | 0.0427 | -0.0190 | -0.0019 | - |
| 0.0029 | 1   | .   |                             |        |        |        |         |         |   |
| 1020   | O   | O   | . GLN GLN GLN A A 135 135 . | 0.0800 | 0.0650 | 0.0451 | 0.0011  | 0.0153  |   |
| 0.0088 | 1   | .   |                             |        |        |        |         |         |   |
| 1021   | N   | N   | . LEU LEU LEU A A 136 136 . | 0.0422 | 0.0313 | 0.0317 | -0.0044 | 0.0079  |   |
| 0.0015 | 1   | .   |                             |        |        |        |         |         |   |
| 1022   | CA  | CA  | . LEU LEU LEU A A 136 136 . | 0.0704 | 0.0570 | 0.0510 | 0.0016  | 0.0007  |   |
| 0.0069 | 1   | .   |                             |        |        |        |         |         |   |
| 1023   | CB  | CB  | . LEU LEU LEU A A 136 136 . | 0.0374 | 0.0313 | 0.0568 | -0.0023 | 0.0177  |   |
| 0.0015 | 1   | .   |                             |        |        |        |         |         |   |
| 1024   | CG  | CG  | . LEU LEU LEU A A 136 136 . | 0.0374 | 0.0314 | 0.0468 | -0.0011 | 0.0045  |   |
| 0.0104 | 1   | .   |                             |        |        |        |         |         |   |
| 1025   | CD1 | CD1 | . LEU LEU LEU A A 136 136 . | 0.0253 | 0.0253 | 0.0253 | 0.0000  | 0.0000  |   |
| 0.0000 | 1   | .   |                             |        |        |        |         |         |   |
| 1026   | CD2 | CD2 | . LEU LEU LEU A A 136 136 . | 0.0561 | 0.0467 | 0.0433 | -0.0227 | 0.0155  | - |
| 0.0046 | 1   | .   |                             |        |        |        |         |         |   |
| 1027   | C   | C   | . LEU LEU LEU A A 136 136 . | 0.0723 | 0.0493 | 0.0542 | -0.0021 | 0.0025  |   |
| 0.0030 | 1   | .   |                             |        |        |        |         |         |   |
| 1028   | O   | O   | . LEU LEU LEU A A 136 136 . | 0.1124 | 0.1046 | 0.0963 | 0.0016  | -0.0103 |   |
| 0.0069 | 1   | .   |                             |        |        |        |         |         |   |
| 1029   | N   | N   | . ALA ALA ALA A A 137 137 . | 0.0902 | 0.0668 | 0.0434 | -0.0110 | 0.0069  |   |
| 0.0064 | 1   | .   |                             |        |        |        |         |         |   |
| 1030   | CA  | CA  | . ALA ALA ALA A A 137 137 . | 0.0735 | 0.0780 | 0.0624 | -0.0082 | 0.0144  |   |
| 0.0052 | 1   | .   |                             |        |        |        |         |         |   |
| 1031   | CB  | CB  | . ALA ALA ALA A A 137 137 . | 0.0860 | 0.0659 | 0.0691 | -0.0126 | 0.0050  |   |
| 0.0070 | 1   | .   |                             |        |        |        |         |         |   |
| 1032   | C   | C   | . ALA ALA ALA A A 137 137 . | 0.0896 | 0.1008 | 0.0819 | 0.0010  | 0.0023  |   |
| 0.0001 | 1   | .   |                             |        |        |        |         |         |   |

|        |     |     |                   |         |                                          |
|--------|-----|-----|-------------------|---------|------------------------------------------|
| 1033   | O   | O   | . ALA ALA ALA A A | 137 137 | . 0.1165 0.1322 0.0950 0.0113 0.0011     |
| 0.0198 | 1   | .   |                   |         |                                          |
| 1034   | N   | N   | . GLY GLY GLY A A | 138 138 | . 0.1000 0.1021 0.0868 -0.0026 0.0130    |
| 0.0023 | 1   | .   |                   |         |                                          |
| 1035   | CA  | CA  | . GLY GLY GLY A A | 138 138 | . 0.1315 0.1152 0.1029 0.0042 0.0121     |
| 0.0054 | 1   | .   |                   |         |                                          |
| 1036   | C   | C   | . GLY GLY GLY A A | 138 138 | . 0.1336 0.1295 0.1184 -0.0109 0.0000    |
| 0.0008 | 1   | .   |                   |         |                                          |
| 1037   | O   | O   | . GLY GLY GLY A A | 138 138 | . 0.1847 0.1548 0.1669 -0.0057 -0.0074   |
| 0.0039 | 1   | .   |                   |         |                                          |
| 1038   | N   | N   | . ASN ASN ASN A A | 139 139 | . 0.1235 0.1372 0.1369 -0.0069 -0.0059 - |
| 0.0019 | 1   | .   |                   |         |                                          |
| 1039   | CA  | CA  | . ASN ASN ASN A A | 139 139 | . 0.1386 0.1386 0.1389 -0.0024 0.0049    |
| 0.0063 | 1   | .   |                   |         |                                          |
| 1040   | CB  | CB  | . ASN ASN ASN A A | 139 139 | . 0.1175 0.1284 0.0930 -0.0071 0.0088    |
| 0.0179 | 1   | .   |                   |         |                                          |
| 1041   | CG  | CG  | . ASN ASN ASN A A | 139 139 | . 0.1256 0.1120 0.1115 0.0055 0.0087     |
| 0.0156 | 1   | .   |                   |         |                                          |
| 1042   | OD1 | OD1 | . ASN ASN ASN A A | 139 139 | . 0.2187 0.2211 0.1207 0.0266 0.0055     |
| 0.0078 | 1   | .   |                   |         |                                          |
| 1043   | ND2 | ND2 | . ASN ASN ASN A A | 139 139 | . 0.1302 0.1033 0.1002 0.0109 0.0050 -   |
| 0.0173 | 1   | .   |                   |         |                                          |
| 1044   | C   | C   | . ASN ASN ASN A A | 139 139 | . 0.1530 0.1651 0.1559 -0.0073 0.0014    |
| 0.0016 | 1   | .   |                   |         |                                          |
| 1045   | O   | O   | . ASN ASN ASN A A | 139 139 | . 0.1741 0.1738 0.1512 -0.0026 0.0200 -  |
| 0.0062 | 1   | .   |                   |         |                                          |
| 1046   | N   | N   | . SER SER SER A A | 140 140 | . 0.2091 0.2029 0.2051 0.0054 0.0053     |
| 0.0033 | 1   | .   |                   |         |                                          |
| 1047   | CA  | CA  | . SER SER SER A A | 140 140 | . 0.2462 0.2527 0.2534 0.0008 0.0077     |
| 0.0006 | 1   | .   |                   |         |                                          |
| 1048   | CB  | CB  | . SER SER SER A A | 140 140 | . 0.2452 0.2609 0.2593 0.0046 0.0107 -   |
| 0.0015 | 1   | .   |                   |         |                                          |
| 1049   | OG  | OG  | . SER SER SER A A | 140 140 | . 0.3172 0.3262 0.3389 0.0128 0.0297 -   |
| 0.0030 | 1   | .   |                   |         |                                          |
| 1050   | C   | C   | . SER SER SER A A | 140 140 | . 0.2584 0.2582 0.2545 0.0069 0.0036 -   |
| 0.0006 | 1   | .   |                   |         |                                          |
| 1051   | O   | O   | . SER SER SER A A | 140 140 | . 0.2610 0.2734 0.2831 0.0143 0.0079 -   |
| 0.0094 | 1   | .   |                   |         |                                          |
| 1052   | N   | N   | . ASP ASP ASP A A | 141 141 | . 0.2519 0.2512 0.2384 -0.0033 0.0069 -  |
| 0.0056 | 1   | .   |                   |         |                                          |
| 1053   | CA  | CA  | . ASP ASP ASP A A | 141 141 | . 0.2394 0.2462 0.2379 -0.0019 0.0098    |
| 0.0022 | 1   | .   |                   |         |                                          |
| 1054   | CB  | CB  | . ASP ASP ASP A A | 141 141 | . 0.2443 0.2571 0.2465 0.0016 -0.0049 -  |
| 0.0025 | 1   | .   |                   |         |                                          |
| 1055   | CG  | CG  | . ASP ASP ASP A A | 141 141 | . 0.3177 0.3086 0.3228 -0.0166 0.0081    |
| 0.0123 | 1   | .   |                   |         |                                          |
| 1056   | OD1 | OD1 | . ASP ASP ASP A A | 141 141 | . 0.4182 0.4481 0.3678 -0.0379 -0.0511   |
| 0.0268 | 1   | .   |                   |         |                                          |
| 1057   | OD2 | OD2 | . ASP ASP ASP A A | 141 141 | . 0.3347 0.3384 0.3757 0.0207 0.0192     |
| 0.0191 | 1   | .   |                   |         |                                          |
| 1058   | C   | C   | . ASP ASP ASP A A | 141 141 | . 0.2139 0.2069 0.2089 -0.0028 -0.0037   |
| 0.0046 | 1   | .   |                   |         |                                          |
| 1059   | O   | O   | . ASP ASP ASP A A | 141 141 | . 0.2166 0.2160 0.2303 -0.0185 -0.0081   |
| 0.0065 | 1   | .   |                   |         |                                          |
| 1060   | N   | N   | . LEU LEU LEU A A | 142 142 | . 0.1589 0.1612 0.1522 -0.0135 -0.0009 - |
| 0.0022 | 1   | .   |                   |         |                                          |
| 1061   | CA  | CA  | . LEU LEU LEU A A | 142 142 | . 0.0980 0.0952 0.1030 -0.0106 0.0012    |
| 0.0002 | 1   | .   |                   |         |                                          |
| 1062   | CB  | CB  | . LEU LEU LEU A A | 142 142 | . 0.0912 0.0465 0.0500 -0.0213 0.0072 -  |
| 0.0016 | 1   | .   |                   |         |                                          |

|        |     |     |                             |        |        |        |         |         |   |
|--------|-----|-----|-----------------------------|--------|--------|--------|---------|---------|---|
| 1063   | CG  | CG  | . LEU LEU LEU A A 142 142 . | 0.1022 | 0.1327 | 0.1392 | -0.0417 | 0.0067  |   |
| 0.0156 | 1   | .   |                             |        |        |        |         |         |   |
| 1064   | CD1 | CD1 | . LEU LEU LEU A A 142 142 . | 0.1975 | 0.1750 | 0.1631 | -0.0273 | 0.0254  |   |
| 0.0450 | 1   | .   |                             |        |        |        |         |         |   |
| 1065   | CD2 | CD2 | . LEU LEU LEU A A 142 142 . | 0.1135 | 0.1644 | 0.1701 | -0.0372 | 0.0384  | - |
| 0.0067 | 1   | .   |                             |        |        |        |         |         |   |
| 1066   | C   | C   | . LEU LEU LEU A A 142 142 . | 0.0930 | 0.0953 | 0.0867 | -0.0051 | 0.0012  | - |
| 0.0171 | 1   | .   |                             |        |        |        |         |         |   |
| 1067   | O   | O   | . LEU LEU LEU A A 142 142 . | 0.0864 | 0.1072 | 0.1075 | -0.0014 | 0.0129  | - |
| 0.0200 | 1   | .   |                             |        |        |        |         |         |   |
| 1068   | N   | N   | . ILE ILE ILE A A 143 143 . | 0.0550 | 0.0770 | 0.0805 | -0.0153 | -0.0033 | - |
| 0.0030 | 1   | .   |                             |        |        |        |         |         |   |
| 1069   | CA  | CA  | . ILE ILE ILE A A 143 143 . | 0.0677 | 0.0640 | 0.0522 | -0.0047 | -0.0051 |   |
| 0.0098 | 1   | .   |                             |        |        |        |         |         |   |
| 1070   | CB  | CB  | . ILE ILE ILE A A 143 143 . | 0.0983 | 0.1195 | 0.0953 | -0.0086 | -0.0014 |   |
| 0.0214 | 1   | .   |                             |        |        |        |         |         |   |
| 1071   | CG1 | CG1 | . ILE ILE ILE A A 143 143 . | 0.1744 | 0.1879 | 0.1281 | 0.0082  | 0.0086  |   |
| 0.0020 | 1   | .   |                             |        |        |        |         |         |   |
| 1072   | CD1 | CD1 | . ILE ILE ILE A A 143 143 . | 0.2131 | 0.1716 | 0.2067 | -0.0181 | -0.0146 | - |
| 0.0389 | 1   | .   |                             |        |        |        |         |         |   |
| 1073   | CG2 | CG2 | . ILE ILE ILE A A 143 143 . | 0.1437 | 0.1894 | 0.1203 | 0.0249  | -0.0172 |   |
| 0.0485 | 1   | .   |                             |        |        |        |         |         |   |
| 1074   | C   | C   | . ILE ILE ILE A A 143 143 . | 0.0253 | 0.0253 | 0.0253 | 0.0000  | 0.0000  |   |
| 0.0000 | 1   | .   |                             |        |        |        |         |         |   |
| 1075   | O   | O   | . ILE ILE ILE A A 143 143 . | 0.0378 | 0.0550 | 0.0432 | -0.0011 | 0.0088  |   |
| 0.0178 | 1   | .   |                             |        |        |        |         |         |   |
| 1076   | N   | N   | . LEU LEU LEU A A 144 144 . | 0.0253 | 0.0253 | 0.0253 | 0.0000  | 0.0000  |   |
| 0.0000 | 1   | .   |                             |        |        |        |         |         |   |
| 1077   | CA  | CA  | . LEU LEU LEU A A 144 144 . | 0.0253 | 0.0253 | 0.0253 | 0.0000  | 0.0000  |   |
| 0.0000 | 1   | .   |                             |        |        |        |         |         |   |
| 1078   | CB  | CB  | . LEU LEU LEU A A 144 144 . | 0.0253 | 0.0253 | 0.0253 | 0.0000  | 0.0000  |   |
| 0.0000 | 1   | .   |                             |        |        |        |         |         |   |
| 1079   | CG  | CG  | . LEU LEU LEU A A 144 144 . | 0.0254 | 0.0263 | 0.0253 | 0.0003  | 0.0000  |   |
| 0.0000 | 1   | .   |                             |        |        |        |         |         |   |
| 1080   | CD1 | CD1 | . LEU LEU LEU A A 144 144 . | 0.0561 | 0.0323 | 0.0317 | 0.0146  | -0.0133 | - |
| 0.0066 | 1   | .   |                             |        |        |        |         |         |   |
| 1081   | CD2 | CD2 | . LEU LEU LEU A A 144 144 . | 0.0455 | 0.0350 | 0.0304 | -0.0009 | 0.0027  | - |
| 0.0005 | 1   | .   |                             |        |        |        |         |         |   |
| 1082   | C   | C   | . LEU LEU LEU A A 144 144 . | 0.0253 | 0.0253 | 0.0253 | 0.0000  | 0.0000  |   |
| 0.0000 | 1   | .   |                             |        |        |        |         |         |   |
| 1083   | O   | O   | . LEU LEU LEU A A 144 144 . | 0.0262 | 0.0259 | 0.0256 | -0.0007 | 0.0005  | - |
| 0.0004 | 1   | .   |                             |        |        |        |         |         |   |
| 1084   | N   | N   | . PRO PRO PRO A A 145 145 . | 0.0253 | 0.0253 | 0.0253 | 0.0000  | 0.0000  |   |
| 0.0000 | 1   | .   |                             |        |        |        |         |         |   |
| 1085   | CA  | CA  | . PRO PRO PRO A A 145 145 . | 0.0253 | 0.0253 | 0.0253 | 0.0000  | 0.0000  |   |
| 0.0000 | 1   | .   |                             |        |        |        |         |         |   |
| 1086   | CB  | CB  | . PRO PRO PRO A A 145 145 . | 0.0253 | 0.0253 | 0.0253 | 0.0000  | 0.0000  |   |
| 0.0000 | 1   | .   |                             |        |        |        |         |         |   |
| 1087   | CG  | CG  | . PRO PRO PRO A A 145 145 . | 0.0253 | 0.0253 | 0.0253 | 0.0000  | 0.0000  |   |
| 0.0000 | 1   | .   |                             |        |        |        |         |         |   |
| 1088   | CD  | CD  | . PRO PRO PRO A A 145 145 . | 0.0254 | 0.0267 | 0.0268 | -0.0003 | 0.0003  | - |
| 0.0014 | 1   | .   |                             |        |        |        |         |         |   |
| 1089   | C   | C   | . PRO PRO PRO A A 145 145 . | 0.0253 | 0.0253 | 0.0253 | 0.0000  | 0.0000  |   |
| 0.0000 | 1   | .   |                             |        |        |        |         |         |   |
| 1090   | O   | O   | . PRO PRO PRO A A 145 145 . | 0.0253 | 0.0253 | 0.0253 | 0.0000  | 0.0000  |   |
| 0.0000 | 1   | .   |                             |        |        |        |         |         |   |
| 1091   | N   | N   | . VAL VAL VAL A A 146 146 . | 0.0253 | 0.0253 | 0.0253 | 0.0000  | 0.0000  |   |
| 0.0000 | 1   | .   |                             |        |        |        |         |         |   |
| 1092   | CA  | CA  | . VAL VAL VAL A A 146 146 . | 0.0253 | 0.0253 | 0.0253 | 0.0000  | 0.0000  |   |
| 0.0000 | 1   | .   |                             |        |        |        |         |         |   |









|        |     |     |                             |        |        |        |         |         |   |
|--------|-----|-----|-----------------------------|--------|--------|--------|---------|---------|---|
| 1183   | C   | C   | . GLY GLY GLY A A 159 159 . | 0.0717 | 0.0573 | 0.0646 | -0.0098 | -0.0037 | - |
| 0.0037 | 1   | .   |                             |        |        |        |         |         |   |
| 1184   | O   | O   | . GLY GLY GLY A A 159 159 . | 0.0981 | 0.1141 | 0.1189 | -0.0116 | 0.0111  | - |
| 0.0005 | 1   | .   |                             |        |        |        |         |         |   |
| 1185   | N   | N   | . ASN ASN ASN A A 160 160 . | 0.0487 | 0.0361 | 0.0559 | -0.0118 | -0.0082 | - |
| 0.0033 | 1   | .   |                             |        |        |        |         |         |   |
| 1186   | CA  | CA  | . ASN ASN ASN A A 160 160 . | 0.0545 | 0.0609 | 0.0534 | 0.0001  | 0.0015  | - |
| 0.0060 | 1   | .   |                             |        |        |        |         |         |   |
| 1187   | CB  | CB  | . ASN ASN ASN A A 160 160 . | 0.0353 | 0.0384 | 0.0398 | 0.0016  | 0.0118  | - |
| 0.0043 | 1   | .   |                             |        |        |        |         |         |   |
| 1188   | CG  | CG  | . ASN ASN ASN A A 160 160 . | 0.0253 | 0.0253 | 0.0253 | 0.0000  | 0.0000  | - |
| 0.0000 | 1   | .   |                             |        |        |        |         |         |   |
| 1189   | OD1 | OD1 | . ASN ASN ASN A A 160 160 . | 0.0335 | 0.0264 | 0.0409 | 0.0028  | 0.0108  | - |
| 0.0032 | 1   | .   |                             |        |        |        |         |         |   |
| 1190   | ND2 | ND2 | . ASN ASN ASN A A 160 160 . | 0.0389 | 0.0282 | 0.0393 | -0.0063 | 0.0138  | - |
| 0.0063 | 1   | .   |                             |        |        |        |         |         |   |
| 1191   | C   | C   | . ASN ASN ASN A A 160 160 . | 0.0376 | 0.0324 | 0.0344 | -0.0076 | 0.0002  | - |
| 0.0044 | 1   | .   |                             |        |        |        |         |         |   |
| 1192   | O   | O   | . ASN ASN ASN A A 160 160 . | 0.0427 | 0.0598 | 0.0555 | 0.0144  | 0.0103  | - |
| 0.0097 | 1   | .   |                             |        |        |        |         |         |   |
| 1193   | N   | N   | . LYS LYS LYS A A 161 161 . | 0.0518 | 0.0558 | 0.0434 | 0.0072  | 0.0052  | - |
| 0.0125 | 1   | .   |                             |        |        |        |         |         |   |
| 1194   | CA  | CA  | . LYS LYS LYS A A 161 161 . | 0.0455 | 0.0522 | 0.0459 | -0.0079 | -0.0021 | - |
| 0.0165 | 1   | .   |                             |        |        |        |         |         |   |
| 1195   | CB  | CB  | . LYS LYS LYS A A 161 161 . | 0.0602 | 0.0596 | 0.0784 | -0.0266 | 0.0026  | - |
| 0.0020 | 1   | .   |                             |        |        |        |         |         |   |
| 1196   | CG  | CG  | . LYS LYS LYS A A 161 161 . | 0.0816 | 0.0646 | 0.0807 | 0.0023  | 0.0064  | - |
| 0.0005 | 1   | .   |                             |        |        |        |         |         |   |
| 1197   | CD  | CD  | . LYS LYS LYS A A 161 161 . | 0.1280 | 0.1798 | 0.1754 | -0.0095 | -0.0128 | - |
| 0.0136 | 1   | .   |                             |        |        |        |         |         |   |
| 1198   | CE  | CE  | . LYS LYS LYS A A 161 161 . | 0.2286 | 0.2350 | 0.2332 | -0.0155 | 0.0085  | - |
| 0.0099 | 1   | .   |                             |        |        |        |         |         |   |
| 1199   | NZ  | NZ  | . LYS LYS LYS A A 161 161 . | 0.2209 | 0.2605 | 0.2787 | -0.0492 | 0.0076  | - |
| 0.0341 | 1   | .   |                             |        |        |        |         |         |   |
| 1200   | C   | C   | . LYS LYS LYS A A 161 161 . | 0.0391 | 0.0356 | 0.0558 | 0.0015  | 0.0048  | - |
| 0.0002 | 1   | .   |                             |        |        |        |         |         |   |
| 1201   | O   | O   | . LYS LYS LYS A A 161 161 . | 0.0478 | 0.0655 | 0.0544 | -0.0004 | 0.0028  | - |
| 0.0090 | 1   | .   |                             |        |        |        |         |         |   |
| 1202   | N   | N   | . LEU LEU LEU A A 162 162 . | 0.0370 | 0.0582 | 0.0466 | 0.0003  | 0.0079  | - |
| 0.0044 | 1   | .   |                             |        |        |        |         |         |   |
| 1203   | CA  | CA  | . LEU LEU LEU A A 162 162 . | 0.0321 | 0.0291 | 0.0363 | 0.0024  | 0.0018  | - |
| 0.0061 | 1   | .   |                             |        |        |        |         |         |   |
| 1204   | CB  | CB  | . LEU LEU LEU A A 162 162 . | 0.0328 | 0.0328 | 0.0505 | -0.0063 | 0.0105  | - |
| 0.0041 | 1   | .   |                             |        |        |        |         |         |   |
| 1205   | CG  | CG  | . LEU LEU LEU A A 162 162 . | 0.0282 | 0.0358 | 0.0444 | -0.0054 | 0.0038  | - |
| 0.0093 | 1   | .   |                             |        |        |        |         |         |   |
| 1206   | CD1 | CD1 | . LEU LEU LEU A A 162 162 . | 0.0396 | 0.0484 | 0.0410 | 0.0018  | 0.0012  | - |
| 0.0187 | 1   | .   |                             |        |        |        |         |         |   |
| 1207   | CD2 | CD2 | . LEU LEU LEU A A 162 162 . | 0.0331 | 0.0368 | 0.0491 | -0.0009 | -0.0033 | - |
| 0.0156 | 1   | .   |                             |        |        |        |         |         |   |
| 1208   | C   | C   | . LEU LEU LEU A A 162 162 . | 0.0496 | 0.0529 | 0.0476 | -0.0067 | -0.0045 | - |
| 0.0030 | 1   | .   |                             |        |        |        |         |         |   |
| 1209   | O   | O   | . LEU LEU LEU A A 162 162 . | 0.0642 | 0.0379 | 0.0473 | -0.0054 | -0.0062 | - |
| 0.0093 | 1   | .   |                             |        |        |        |         |         |   |
| 1210   | N   | N   | . ALA ALA ALA A A 163 163 . | 0.0285 | 0.0311 | 0.0381 | -0.0024 | -0.0030 | - |
| 0.0085 | 1   | .   |                             |        |        |        |         |         |   |
| 1211   | CA  | CA  | . ALA ALA ALA A A 163 163 . | 0.0260 | 0.0255 | 0.0274 | 0.0003  | -0.0012 | - |
| 0.0006 | 1   | .   |                             |        |        |        |         |         |   |
| 1212   | CB  | CB  | . ALA ALA ALA A A 163 163 . | 0.0487 | 0.0455 | 0.0661 | 0.0070  | -0.0001 | - |
| 0.0095 | 1   | .   |                             |        |        |        |         |         |   |











|        |     |     |                             |        |        |        |         |         |   |
|--------|-----|-----|-----------------------------|--------|--------|--------|---------|---------|---|
| 1363   | CZ  | CZ  | . ARG ARG ARG A A 182 182 . | 0.1692 | 0.1825 | 0.1637 | -0.0017 | 0.0315  | - |
| 0.0249 | 1   | .   |                             |        |        |        |         |         |   |
| 1364   | NH1 | NH1 | . ARG ARG ARG A A 182 182 . | 0.1780 | 0.1379 | 0.1752 | 0.0129  | -0.0080 | - |
| 0.0510 | 1   | .   |                             |        |        |        |         |         |   |
| 1365   | NH2 | NH2 | . ARG ARG ARG A A 182 182 . | 0.1357 | 0.1752 | 0.1676 | -0.0009 | -0.0470 | - |
| 0.0237 | 1   | .   |                             |        |        |        |         |         |   |
| 1366   | C   | C   | . ARG ARG ARG A A 182 182 . | 0.0253 | 0.0253 | 0.0253 | 0.0000  | 0.0000  |   |
| 0.0000 | 1   | .   |                             |        |        |        |         |         |   |
| 1367   | O   | O   | . ARG ARG ARG A A 182 182 . | 0.0253 | 0.0257 | 0.0266 | 0.0000  | 0.0000  |   |
| 0.0007 | 1   | .   |                             |        |        |        |         |         |   |
| 1368   | N   | N   | . LEU LEU LEU A A 183 183 . | 0.0253 | 0.0253 | 0.0253 | 0.0000  | 0.0000  |   |
| 0.0000 | 1   | .   |                             |        |        |        |         |         |   |
| 1369   | CA  | CA  | . LEU LEU LEU A A 183 183 . | 0.0254 | 0.0266 | 0.0297 | 0.0003  | -0.0006 | - |
| 0.0024 | 1   | .   |                             |        |        |        |         |         |   |
| 1370   | CB  | CB  | . LEU LEU LEU A A 183 183 . | 0.0253 | 0.0253 | 0.0253 | 0.0000  | 0.0000  |   |
| 0.0000 | 1   | .   |                             |        |        |        |         |         |   |
| 1371   | CG  | CG  | . LEU LEU LEU A A 183 183 . | 0.0307 | 0.0316 | 0.0325 | 0.0058  | -0.0062 | - |
| 0.0067 | 1   | .   |                             |        |        |        |         |         |   |
| 1372   | CD1 | CD1 | . LEU LEU LEU A A 183 183 . | 0.0299 | 0.0285 | 0.0350 | 0.0038  | -0.0067 | - |
| 0.0055 | 1   | .   |                             |        |        |        |         |         |   |
| 1373   | CD2 | CD2 | . LEU LEU LEU A A 183 183 . | 0.0485 | 0.0254 | 0.0253 | -0.0019 | 0.0000  |   |
| 0.0000 | 1   | .   |                             |        |        |        |         |         |   |
| 1374   | C   | C   | . LEU LEU LEU A A 183 183 . | 0.0284 | 0.0279 | 0.0268 | -0.0028 | 0.0021  | - |
| 0.0019 | 1   | .   |                             |        |        |        |         |         |   |
| 1375   | O   | O   | . LEU LEU LEU A A 183 183 . | 0.0274 | 0.0306 | 0.0256 | -0.0033 | -0.0008 |   |
| 0.0013 | 1   | .   |                             |        |        |        |         |         |   |
| 1376   | N   | N   | . GLY GLY GLY A A 184 184 . | 0.0253 | 0.0253 | 0.0253 | 0.0000  | 0.0000  |   |
| 0.0000 | 1   | .   |                             |        |        |        |         |         |   |
| 1377   | CA  | CA  | . GLY GLY GLY A A 184 184 . | 0.0253 | 0.0253 | 0.0253 | 0.0000  | 0.0000  |   |
| 0.0000 | 1   | .   |                             |        |        |        |         |         |   |
| 1378   | C   | C   | . GLY GLY GLY A A 184 184 . | 0.0253 | 0.0253 | 0.0253 | 0.0000  | 0.0000  |   |
| 0.0000 | 1   | .   |                             |        |        |        |         |         |   |
| 1379   | O   | O   | . GLY GLY GLY A A 184 184 . | 0.0253 | 0.0253 | 0.0253 | 0.0000  | 0.0000  |   |
| 0.0000 | 1   | .   |                             |        |        |        |         |         |   |
| 1380   | N   | N   | . ALA ALA ALA A A 185 185 . | 0.0253 | 0.0253 | 0.0253 | 0.0000  | 0.0000  |   |
| 0.0000 | 1   | .   |                             |        |        |        |         |         |   |
| 1381   | CA  | CA  | . ALA ALA ALA A A 185 185 . | 0.0253 | 0.0253 | 0.0253 | 0.0000  | 0.0000  |   |
| 0.0000 | 1   | .   |                             |        |        |        |         |         |   |
| 1382   | CB  | CB  | . ALA ALA ALA A A 185 185 . | 0.0253 | 0.0253 | 0.0253 | 0.0000  | 0.0000  |   |
| 0.0000 | 1   | .   |                             |        |        |        |         |         |   |
| 1383   | C   | C   | . ALA ALA ALA A A 185 185 . | 0.0273 | 0.0260 | 0.0278 | -0.0011 | 0.0022  | - |
| 0.0013 | 1   | .   |                             |        |        |        |         |         |   |
| 1384   | O   | O   | . ALA ALA ALA A A 185 185 . | 0.0253 | 0.0253 | 0.0253 | 0.0000  | 0.0000  |   |
| 0.0000 | 1   | .   |                             |        |        |        |         |         |   |
| 1385   | N   | N   | . GLU GLU GLU A A 186 186 . | 0.0253 | 0.0253 | 0.0253 | 0.0000  | 0.0000  |   |
| 0.0000 | 1   | .   |                             |        |        |        |         |         |   |
| 1386   | CA  | CA  | . GLU GLU GLU A A 186 186 . | 0.0253 | 0.0253 | 0.0253 | 0.0000  | 0.0000  |   |
| 0.0000 | 1   | .   |                             |        |        |        |         |         |   |
| 1387   | CB  | CB  | . GLU GLU GLU A A 186 186 . | 0.0261 | 0.0257 | 0.0254 | -0.0005 | 0.0003  | - |
| 0.0002 | 1   | .   |                             |        |        |        |         |         |   |
| 1388   | CG  | CG  | . GLU GLU GLU A A 186 186 . | 0.0262 | 0.0421 | 0.0336 | 0.0039  | -0.0028 | - |
| 0.0118 | 1   | .   |                             |        |        |        |         |         |   |
| 1389   | CD  | CD  | . GLU GLU GLU A A 186 186 . | 0.0468 | 0.0532 | 0.0462 | 0.0087  | -0.0061 | - |
| 0.0241 | 1   | .   |                             |        |        |        |         |         |   |
| 1390   | OE1 | OE1 | . GLU GLU GLU A A 186 186 . | 0.0674 | 0.0903 | 0.0792 | 0.0106  | 0.0024  | - |
| 0.0355 | 1   | .   |                             |        |        |        |         |         |   |
| 1391   | OE2 | OE2 | . GLU GLU GLU A A 186 186 . | 0.0525 | 0.0459 | 0.0576 | -0.0011 | 0.0078  | - |
| 0.0251 | 1   | .   |                             |        |        |        |         |         |   |
| 1392   | C   | C   | . GLU GLU GLU A A 186 186 . | 0.0253 | 0.0253 | 0.0253 | 0.0000  | 0.0000  |   |
| 0.0000 | 1   | .   |                             |        |        |        |         |         |   |













|        |     |     |                             |        |        |        |         |         |   |
|--------|-----|-----|-----------------------------|--------|--------|--------|---------|---------|---|
| 1543   | C   | C   | . ASN ASN ASN A A 205 205 . | 0.0253 | 0.0253 | 0.0253 | 0.0000  | 0.0000  |   |
| 0.0000 | 1   | .   |                             |        |        |        |         |         |   |
| 1544   | O   | O   | . ASN ASN ASN A A 205 205 . | 0.0253 | 0.0253 | 0.0253 | 0.0000  | 0.0000  |   |
| 0.0000 | 1   | .   |                             |        |        |        |         |         |   |
| 1545   | N   | N   | . VAL VAL VAL A A 206 206 . | 0.0253 | 0.0253 | 0.0253 | 0.0000  | 0.0000  |   |
| 0.0000 | 1   | .   |                             |        |        |        |         |         |   |
| 1546   | CA  | CA  | . VAL VAL VAL A A 206 206 . | 0.0253 | 0.0253 | 0.0253 | 0.0000  | 0.0000  |   |
| 0.0000 | 1   | .   |                             |        |        |        |         |         |   |
| 1547   | CB  | CB  | . VAL VAL VAL A A 206 206 . | 0.0253 | 0.0253 | 0.0253 | 0.0000  | 0.0000  |   |
| 0.0000 | 1   | .   |                             |        |        |        |         |         |   |
| 1548   | CG1 | CG1 | . VAL VAL VAL A A 206 206 . | 0.0313 | 0.0258 | 0.0307 | 0.0017  | 0.0057  |   |
| 0.0016 | 1   | .   |                             |        |        |        |         |         |   |
| 1549   | CG2 | CG2 | . VAL VAL VAL A A 206 206 . | 0.0256 | 0.0303 | 0.0356 | 0.0013  | 0.0019  |   |
| 0.0072 | 1   | .   |                             |        |        |        |         |         |   |
| 1550   | C   | C   | . VAL VAL VAL A A 206 206 . | 0.0261 | 0.0281 | 0.0258 | -0.0015 | 0.0006  | - |
| 0.0011 | 1   | .   |                             |        |        |        |         |         |   |
| 1551   | O   | O   | . VAL VAL VAL A A 206 206 . | 0.0329 | 0.0300 | 0.0339 | -0.0059 | 0.0080  | - |
| 0.0063 | 1   | .   |                             |        |        |        |         |         |   |
| 1552   | N   | N   | . GLY GLY GLY A A 207 207 . | 0.0253 | 0.0253 | 0.0253 | 0.0000  | 0.0000  |   |
| 0.0000 | 1   | .   |                             |        |        |        |         |         |   |
| 1553   | CA  | CA  | . GLY GLY GLY A A 207 207 . | 0.0253 | 0.0253 | 0.0253 | 0.0000  | 0.0000  |   |
| 0.0000 | 1   | .   |                             |        |        |        |         |         |   |
| 1554   | C   | C   | . GLY GLY GLY A A 207 207 . | 0.0253 | 0.0253 | 0.0253 | 0.0000  | 0.0000  |   |
| 0.0000 | 1   | .   |                             |        |        |        |         |         |   |
| 1555   | O   | O   | . GLY GLY GLY A A 207 207 . | 0.0263 | 0.0265 | 0.0269 | -0.0011 | 0.0012  | - |
| 0.0014 | 1   | .   |                             |        |        |        |         |         |   |
| 1556   | N   | N   | . ASP ASP ASP A A 208 208 . | 0.0253 | 0.0253 | 0.0253 | 0.0000  | 0.0000  |   |
| 0.0000 | 1   | .   |                             |        |        |        |         |         |   |
| 1557   | CA  | CA  | . ASP ASP ASP A A 208 208 . | 0.0253 | 0.0253 | 0.0253 | 0.0000  | 0.0000  |   |
| 0.0000 | 1   | .   |                             |        |        |        |         |         |   |
| 1558   | CB  | CB  | . ASP ASP ASP A A 208 208 . | 0.0253 | 0.0253 | 0.0253 | 0.0000  | 0.0000  |   |
| 0.0000 | 1   | .   |                             |        |        |        |         |         |   |
| 1559   | CG  | CG  | . ASP ASP ASP A A 208 208 . | 0.0625 | 0.0726 | 0.0519 | 0.0217  | 0.0029  |   |
| 0.0114 | 1   | .   |                             |        |        |        |         |         |   |
| 1560   | OD1 | OD1 | . ASP ASP ASP A A 208 208 . | 0.0657 | 0.0679 | 0.0441 | 0.0149  | 0.0036  |   |
| 0.0061 | 1   | .   |                             |        |        |        |         |         |   |
| 1561   | OD2 | OD2 | . ASP ASP ASP A A 208 208 . | 0.0673 | 0.0499 | 0.0552 | 0.0249  | 0.0041  | - |
| 0.0144 | 1   | .   |                             |        |        |        |         |         |   |
| 1562   | C   | C   | . ASP ASP ASP A A 208 208 . | 0.0253 | 0.0253 | 0.0253 | 0.0000  | 0.0000  |   |
| 0.0000 | 1   | .   |                             |        |        |        |         |         |   |
| 1563   | O   | O   | . ASP ASP ASP A A 208 208 . | 0.0253 | 0.0253 | 0.0253 | 0.0000  | 0.0000  |   |
| 0.0000 | 1   | .   |                             |        |        |        |         |         |   |
| 1564   | N   | N   | . GLU GLU GLU A A 209 209 . | 0.0253 | 0.0253 | 0.0253 | 0.0000  | 0.0000  |   |
| 0.0000 | 1   | .   |                             |        |        |        |         |         |   |
| 1565   | CA  | CA  | . GLU GLU GLU A A 209 209 . | 0.0253 | 0.0253 | 0.0253 | 0.0000  | 0.0000  |   |
| 0.0000 | 1   | .   |                             |        |        |        |         |         |   |
| 1566   | CB  | CB  | . GLU GLU GLU A A 209 209 . | 0.0253 | 0.0253 | 0.0253 | 0.0000  | 0.0000  |   |
| 0.0000 | 1   | .   |                             |        |        |        |         |         |   |
| 1567   | CG  | CG  | . GLU GLU GLU A A 209 209 . | 0.0254 | 0.0253 | 0.0377 | 0.0000  | 0.0011  |   |
| 0.0000 | 1   | .   |                             |        |        |        |         |         |   |
| 1568   | CD  | CD  | . GLU GLU GLU A A 209 209 . | 0.0746 | 0.0659 | 0.0371 | 0.0042  | 0.0059  | - |
| 0.0045 | 1   | .   |                             |        |        |        |         |         |   |
| 1569   | OE1 | OE1 | . GLU GLU GLU A A 209 209 . | 0.0436 | 0.0542 | 0.0607 | 0.0063  | 0.0084  | - |
| 0.0011 | 1   | .   |                             |        |        |        |         |         |   |
| 1570   | OE2 | OE2 | . GLU GLU GLU A A 209 209 . | 0.0680 | 0.0617 | 0.1019 | -0.0033 | -0.0108 |   |
| 0.0016 | 1   | .   |                             |        |        |        |         |         |   |
| 1571   | C   | C   | . GLU GLU GLU A A 209 209 . | 0.0253 | 0.0253 | 0.0253 | 0.0000  | 0.0000  |   |
| 0.0000 | 1   | .   |                             |        |        |        |         |         |   |
| 1572   | O   | O   | . GLU GLU GLU A A 209 209 . | 0.0253 | 0.0253 | 0.0253 | 0.0000  | 0.0000  |   |
| 0.0000 | 1   | .   |                             |        |        |        |         |         |   |









|        |     |     |                             |        |        |        |         |         |   |
|--------|-----|-----|-----------------------------|--------|--------|--------|---------|---------|---|
| 1663   | C   | C   | . ALA ALA ALA A A 222 222 . | 0.0313 | 0.0254 | 0.0351 | -0.0009 | -0.0077 |   |
| 0.0012 | 1   | .   |                             |        |        |        |         |         |   |
| 1664   | O   | O   | . ALA ALA ALA A A 222 222 . | 0.0395 | 0.0413 | 0.0324 | 0.0005  | -0.0013 | - |
| 0.0054 | 1   | .   |                             |        |        |        |         |         |   |
| 1665   | N   | N   | . LEU LEU LEU A A 223 223 . | 0.0463 | 0.0472 | 0.0429 | -0.0104 | 0.0027  |   |
| 0.0156 | 1   | .   |                             |        |        |        |         |         |   |
| 1666   | CA  | CA  | . LEU LEU LEU A A 223 223 . | 0.0610 | 0.0527 | 0.0560 | -0.0059 | -0.0027 | - |
| 0.0022 | 1   | .   |                             |        |        |        |         |         |   |
| 1667   | CB  | CB  | . LEU LEU LEU A A 223 223 . | 0.0571 | 0.0643 | 0.0773 | -0.0028 | -0.0073 |   |
| 0.0090 | 1   | .   |                             |        |        |        |         |         |   |
| 1668   | CG  | CG  | . LEU LEU LEU A A 223 223 . | 0.0637 | 0.0672 | 0.0825 | 0.0003  | -0.0016 |   |
| 0.0026 | 1   | .   |                             |        |        |        |         |         |   |
| 1669   | CD1 | CD1 | . LEU LEU LEU A A 223 223 . | 0.0970 | 0.0738 | 0.0653 | -0.0270 | -0.0179 | - |
| 0.0130 | 1   | .   |                             |        |        |        |         |         |   |
| 1670   | CD2 | CD2 | . LEU LEU LEU A A 223 223 . | 0.0489 | 0.0438 | 0.0416 | -0.0117 | 0.0111  | - |
| 0.0174 | 1   | .   |                             |        |        |        |         |         |   |
| 1671   | C   | C   | . LEU LEU LEU A A 223 223 . | 0.0441 | 0.0402 | 0.0587 | 0.0027  | 0.0081  | - |
| 0.0086 | 1   | .   |                             |        |        |        |         |         |   |
| 1672   | O   | O   | . LEU LEU LEU A A 223 223 . | 0.0451 | 0.0392 | 0.0600 | -0.0006 | 0.0029  | - |
| 0.0126 | 1   | .   |                             |        |        |        |         |         |   |
| 1673   | N   | N   | . GLU GLU GLU A A 224 224 . | 0.0755 | 0.0667 | 0.0766 | 0.0060  | 0.0037  | - |
| 0.0018 | 1   | .   |                             |        |        |        |         |         |   |
| 1674   | CA  | CA  | . GLU GLU GLU A A 224 224 . | 0.0783 | 0.0758 | 0.0721 | -0.0051 | -0.0032 | - |
| 0.0059 | 1   | .   |                             |        |        |        |         |         |   |
| 1675   | CB  | CB  | . GLU GLU GLU A A 224 224 . | 0.1021 | 0.1102 | 0.1055 | -0.0159 | 0.0064  | - |
| 0.0110 | 1   | .   |                             |        |        |        |         |         |   |
| 1676   | CG  | CG  | . GLU GLU GLU A A 224 224 . | 0.2378 | 0.1912 | 0.2474 | 0.0053  | -0.0045 |   |
| 0.0097 | 1   | .   |                             |        |        |        |         |         |   |
| 1677   | CD  | CD  | . GLU GLU GLU A A 224 224 . | 0.3489 | 0.3366 | 0.3141 | 0.0010  | 0.0092  | - |
| 0.0273 | 1   | .   |                             |        |        |        |         |         |   |
| 1678   | OE1 | OE1 | . GLU GLU GLU A A 224 224 . | 0.3974 | 0.3331 | 0.4012 | 0.0411  | -0.0199 | - |
| 0.0225 | 1   | .   |                             |        |        |        |         |         |   |
| 1679   | OE2 | OE2 | . GLU GLU GLU A A 224 224 . | 0.3573 | 0.3349 | 0.3600 | 0.0079  | -0.0413 |   |
| 0.0107 | 1   | .   |                             |        |        |        |         |         |   |
| 1680   | C   | C   | . GLU GLU GLU A A 224 224 . | 0.0475 | 0.0478 | 0.0665 | 0.0001  | -0.0011 | - |
| 0.0114 | 1   | .   |                             |        |        |        |         |         |   |
| 1681   | O   | O   | . GLU GLU GLU A A 224 224 . | 0.0600 | 0.0745 | 0.0733 | -0.0111 | 0.0049  | - |
| 0.0176 | 1   | .   |                             |        |        |        |         |         |   |
| 1682   | N   | N   | . LEU LEU LEU A A 225 225 . | 0.0469 | 0.0416 | 0.0364 | -0.0053 | 0.0043  |   |
| 0.0045 | 1   | .   |                             |        |        |        |         |         |   |
| 1683   | CA  | CA  | . LEU LEU LEU A A 225 225 . | 0.0260 | 0.0283 | 0.0312 | -0.0015 | 0.0021  | - |
| 0.0042 | 1   | .   |                             |        |        |        |         |         |   |
| 1684   | CB  | CB  | . LEU LEU LEU A A 225 225 . | 0.0287 | 0.0397 | 0.0331 | -0.0069 | 0.0051  | - |
| 0.0106 | 1   | .   |                             |        |        |        |         |         |   |
| 1685   | CG  | CG  | . LEU LEU LEU A A 225 225 . | 0.0484 | 0.0375 | 0.0636 | 0.0094  | 0.0245  |   |
| 0.0202 | 1   | .   |                             |        |        |        |         |         |   |
| 1686   | CD1 | CD1 | . LEU LEU LEU A A 225 225 . | 0.0772 | 0.0689 | 0.1044 | -0.0444 | 0.0341  | - |
| 0.0115 | 1   | .   |                             |        |        |        |         |         |   |
| 1687   | CD2 | CD2 | . LEU LEU LEU A A 225 225 . | 0.0627 | 0.0424 | 0.0741 | 0.0016  | 0.0190  |   |
| 0.0200 | 1   | .   |                             |        |        |        |         |         |   |
| 1688   | C   | C   | . LEU LEU LEU A A 225 225 . | 0.0253 | 0.0253 | 0.0253 | 0.0000  | 0.0000  |   |
| 0.0000 | 1   | .   |                             |        |        |        |         |         |   |
| 1689   | O   | O   | . LEU LEU LEU A A 225 225 . | 0.0253 | 0.0253 | 0.0253 | 0.0000  | 0.0000  |   |
| 0.0000 | 1   | .   |                             |        |        |        |         |         |   |
| 1690   | N   | N   | . VAL VAL VAL A A 226 226 . | 0.0253 | 0.0253 | 0.0253 | 0.0000  | 0.0000  |   |
| 0.0000 | 1   | .   |                             |        |        |        |         |         |   |
| 1691   | CA  | CA  | . VAL VAL VAL A A 226 226 . | 0.0253 | 0.0253 | 0.0253 | 0.0000  | 0.0000  |   |
| 0.0000 | 1   | .   |                             |        |        |        |         |         |   |
| 1692   | CB  | CB  | . VAL VAL VAL A A 226 226 . | 0.0253 | 0.0253 | 0.0253 | 0.0000  | 0.0000  |   |
| 0.0000 | 1   | .   |                             |        |        |        |         |         |   |





|        |     |     |                             |        |        |        |         |         |   |
|--------|-----|-----|-----------------------------|--------|--------|--------|---------|---------|---|
| 1753   | O   | O   | . GLY GLY GLY A A 234 234 . | 0.0774 | 0.0484 | 0.0691 | -0.0227 | 0.0179  | - |
| 0.0110 | 1   | .   |                             |        |        |        |         |         |   |
| 1754   | N   | N   | . TYR TYR TYR A A 235 235 . | 0.0265 | 0.0254 | 0.0255 | -0.0003 | 0.0005  | - |
| 0.0001 | 1   | .   |                             |        |        |        |         |         |   |
| 1755   | CA  | CA  | . TYR TYR TYR A A 235 235 . | 0.0268 | 0.0264 | 0.0274 | -0.0012 | 0.0017  | - |
| 0.0015 | 1   | .   |                             |        |        |        |         |         |   |
| 1756   | CB  | CB  | . TYR TYR TYR A A 235 235 . | 0.0253 | 0.0253 | 0.0253 | 0.0000  | 0.0000  | - |
| 0.0000 | 1   | .   |                             |        |        |        |         |         |   |
| 1757   | CG  | CG  | . TYR TYR TYR A A 235 235 . | 0.0326 | 0.0283 | 0.0256 | -0.0047 | -0.0015 | - |
| 0.0010 | 1   | .   |                             |        |        |        |         |         |   |
| 1758   | CD1 | CD1 | . TYR TYR TYR A A 235 235 . | 0.0282 | 0.0334 | 0.0265 | -0.0035 | 0.0019  | - |
| 0.0022 | 1   | .   |                             |        |        |        |         |         |   |
| 1759   | CE1 | CE1 | . TYR TYR TYR A A 235 235 . | 0.0256 | 0.0391 | 0.0307 | -0.0021 | 0.0013  | - |
| 0.0086 | 1   | .   |                             |        |        |        |         |         |   |
| 1760   | CZ  | CZ  | . TYR TYR TYR A A 235 235 . | 0.0891 | 0.0919 | 0.0845 | 0.0091  | 0.0009  | - |
| 0.0183 | 1   | .   |                             |        |        |        |         |         |   |
| 1761   | OH  | OH  | . TYR TYR TYR A A 235 235 . | 0.0901 | 0.0733 | 0.0595 | 0.0015  | 0.0008  | - |
| 0.0068 | 1   | .   |                             |        |        |        |         |         |   |
| 1762   | CE2 | CE2 | . TYR TYR TYR A A 235 235 . | 0.0607 | 0.0522 | 0.0485 | -0.0131 | -0.0127 | - |
| 0.0057 | 1   | .   |                             |        |        |        |         |         |   |
| 1763   | CD2 | CD2 | . TYR TYR TYR A A 235 235 . | 0.0483 | 0.0363 | 0.0409 | 0.0086  | 0.0011  | - |
| 0.0105 | 1   | .   |                             |        |        |        |         |         |   |
| 1764   | C   | C   | . TYR TYR TYR A A 235 235 . | 0.0436 | 0.0389 | 0.0414 | -0.0125 | -0.0011 | - |
| 0.0081 | 1   | .   |                             |        |        |        |         |         |   |
| 1765   | O   | O   | . TYR TYR TYR A A 235 235 . | 0.0363 | 0.0260 | 0.0258 | -0.0028 | -0.0023 | - |
| 0.0006 | 1   | .   |                             |        |        |        |         |         |   |
| 1766   | N   | N   | . THR THR THR A A 236 236 . | 0.0461 | 0.0471 | 0.0437 | -0.0153 | 0.0022  | - |
| 0.0140 | 1   | .   |                             |        |        |        |         |         |   |
| 1767   | CA  | CA  | . THR THR THR A A 236 236 . | 0.0745 | 0.0414 | 0.0624 | -0.0051 | 0.0001  | - |
| 0.0079 | 1   | .   |                             |        |        |        |         |         |   |
| 1768   | CB  | CB  | . THR THR THR A A 236 236 . | 0.0660 | 0.0851 | 0.0926 | -0.0205 | -0.0049 | - |
| 0.0050 | 1   | .   |                             |        |        |        |         |         |   |
| 1769   | OG1 | OG1 | . THR THR THR A A 236 236 . | 0.1257 | 0.1525 | 0.0994 | -0.0357 | -0.0092 | - |
| 0.0181 | 1   | .   |                             |        |        |        |         |         |   |
| 1770   | CG2 | CG2 | . THR THR THR A A 236 236 . | 0.0833 | 0.0472 | 0.0443 | -0.0120 | 0.0020  | - |
| 0.0084 | 1   | .   |                             |        |        |        |         |         |   |
| 1771   | C   | C   | . THR THR THR A A 236 236 . | 0.0887 | 0.0914 | 0.0815 | -0.0082 | -0.0013 | - |
| 0.0145 | 1   | .   |                             |        |        |        |         |         |   |
| 1772   | O   | O   | . THR THR THR A A 236 236 . | 0.0758 | 0.0704 | 0.0723 | -0.0002 | -0.0039 | - |
| 0.0024 | 1   | .   |                             |        |        |        |         |         |   |
| 1773   | N   | N   | . GLU GLU GLU A A 237 237 . | 0.0900 | 0.0898 | 0.0906 | 0.0089  | -0.0160 | - |
| 0.0170 | 1   | .   |                             |        |        |        |         |         |   |
| 1774   | CA  | CA  | . GLU GLU GLU A A 237 237 . | 0.1687 | 0.1602 | 0.1672 | -0.0059 | 0.0053  | - |
| 0.0110 | 1   | .   |                             |        |        |        |         |         |   |
| 1775   | CB  | CB  | . GLU GLU GLU A A 237 237 . | 0.2194 | 0.1977 | 0.2052 | 0.0008  | 0.0095  | - |
| 0.0143 | 1   | .   |                             |        |        |        |         |         |   |
| 1776   | CG  | CG  | . GLU GLU GLU A A 237 237 . | 0.2874 | 0.2772 | 0.3082 | -0.0173 | 0.0035  | - |
| 0.0126 | 1   | .   |                             |        |        |        |         |         |   |
| 1777   | CD  | CD  | . GLU GLU GLU A A 237 237 . | 0.3959 | 0.4152 | 0.3905 | 0.0044  | -0.0310 | - |
| 0.0021 | 1   | .   |                             |        |        |        |         |         |   |
| 1778   | OE1 | OE1 | . GLU GLU GLU A A 237 237 . | 0.4170 | 0.3977 | 0.4546 | 0.0262  | -0.0122 | - |
| 0.0173 | 1   | .   |                             |        |        |        |         |         |   |
| 1779   | OE2 | OE2 | . GLU GLU GLU A A 237 237 . | 0.4048 | 0.4399 | 0.4029 | 0.0094  | -0.0146 | - |
| 0.0161 | 1   | .   |                             |        |        |        |         |         |   |
| 1780   | C   | C   | . GLU GLU GLU A A 237 237 . | 0.1683 | 0.1524 | 0.1468 | -0.0132 | -0.0048 | - |
| 0.0009 | 1   | .   |                             |        |        |        |         |         |   |
| 1781   | O   | O   | . GLU GLU GLU A A 237 237 . | 0.1945 | 0.2093 | 0.1687 | -0.0172 | 0.0007  | - |
| 0.0219 | 1   | .   |                             |        |        |        |         |         |   |
| 1782   | N   | N   | . LYS LYS LYS A A 238 238 . | 0.1352 | 0.1220 | 0.1116 | -0.0125 | 0.0056  | - |
| 0.0126 | 1   | .   |                             |        |        |        |         |         |   |



|        |     |     |                             |        |        |        |         |         |   |
|--------|-----|-----|-----------------------------|--------|--------|--------|---------|---------|---|
| 1813   | O   | O   | . ILE ILE ILE A A 241 241 . | 0.0578 | 0.0390 | 0.0367 | -0.0091 | 0.0020  | - |
| 0.0118 | 1   | .   |                             |        |        |        |         |         |   |
| 1814   | N   | N   | . GLY GLY GLY A A 242 242 . | 0.0253 | 0.0253 | 0.0253 | 0.0000  | 0.0000  |   |
| 0.0000 | 1   | .   |                             |        |        |        |         |         |   |
| 1815   | CA  | CA  | . GLY GLY GLY A A 242 242 . | 0.0253 | 0.0253 | 0.0253 | 0.0000  | 0.0000  |   |
| 0.0000 | 1   | .   |                             |        |        |        |         |         |   |
| 1816   | C   | C   | . GLY GLY GLY A A 242 242 . | 0.0253 | 0.0253 | 0.0253 | 0.0000  | 0.0000  |   |
| 0.0000 | 1   | .   |                             |        |        |        |         |         |   |
| 1817   | O   | O   | . GLY GLY GLY A A 242 242 . | 0.0316 | 0.0301 | 0.0270 | 0.0055  | -0.0032 | - |
| 0.0028 | 1   | .   |                             |        |        |        |         |         |   |
| 1818   | N   | N   | . MET MET MET A A 243 243 . | 0.0299 | 0.0254 | 0.0276 | -0.0008 | 0.0032  | - |
| 0.0006 | 1   | .   |                             |        |        |        |         |         |   |
| 1819   | CA  | CA  | . MET MET MET A A 243 243 . | 0.0481 | 0.0403 | 0.0522 | 0.0035  | 0.0132  | - |
| 0.0093 | 1   | .   |                             |        |        |        |         |         |   |
| 1820   | CB  | CB  | . MET MET MET A A 243 243 . | 0.0573 | 0.0645 | 0.0656 | -0.0002 | -0.0004 | - |
| 0.0045 | 1   | .   |                             |        |        |        |         |         |   |
| 1821   | CG  | CG  | . MET MET MET A A 243 243 . | 0.0786 | 0.0717 | 0.1265 | 0.0052  | 0.0165  | - |
| 0.0030 | 1   | .   |                             |        |        |        |         |         |   |
| 1822   | SD  | SD  | . MET MET MET A A 243 243 . | 0.1178 | 0.0931 | 0.1247 | -0.0200 | -0.0054 | - |
| 0.0202 | 1   | .   |                             |        |        |        |         |         |   |
| 1823   | CE  | CE  | . MET MET MET A A 243 243 . | 0.1638 | 0.2103 | 0.1877 | 0.0020  | 0.0447  |   |
| 0.0078 | 1   | .   |                             |        |        |        |         |         |   |
| 1824   | C   | C   | . MET MET MET A A 243 243 . | 0.0316 | 0.0367 | 0.0290 | -0.0015 | 0.0034  |   |
| 0.0036 | 1   | .   |                             |        |        |        |         |         |   |
| 1825   | O   | O   | . MET MET MET A A 243 243 . | 0.0592 | 0.0496 | 0.0596 | -0.0028 | -0.0158 |   |
| 0.0059 | 1   | .   |                             |        |        |        |         |         |   |
| 1826   | N   | N   | . ASP ASP ASP A A 244 244 . | 0.0255 | 0.0256 | 0.0255 | 0.0002  | -0.0002 | - |
| 0.0002 | 1   | .   |                             |        |        |        |         |         |   |
| 1827   | CA  | CA  | . ASP ASP ASP A A 244 244 . | 0.0253 | 0.0253 | 0.0253 | 0.0000  | 0.0000  |   |
| 0.0000 | 1   | .   |                             |        |        |        |         |         |   |
| 1828   | CB  | CB  | . ASP ASP ASP A A 244 244 . | 0.0253 | 0.0253 | 0.0255 | 0.0000  | -0.0001 |   |
| 0.0000 | 1   | .   |                             |        |        |        |         |         |   |
| 1829   | CG  | CG  | . ASP ASP ASP A A 244 244 . | 0.0253 | 0.0253 | 0.0253 | 0.0000  | 0.0000  |   |
| 0.0000 | 1   | .   |                             |        |        |        |         |         |   |
| 1830   | OD1 | OD1 | . ASP ASP ASP A A 244 244 . | 0.0253 | 0.0253 | 0.0253 | 0.0000  | 0.0000  |   |
| 0.0000 | 1   | .   |                             |        |        |        |         |         |   |
| 1831   | OD2 | OD2 | . ASP ASP ASP A A 244 244 . | 0.0253 | 0.0253 | 0.0253 | 0.0000  | 0.0000  |   |
| 0.0000 | 1   | .   |                             |        |        |        |         |         |   |
| 1832   | C   | C   | . ASP ASP ASP A A 244 244 . | 0.0253 | 0.0253 | 0.0253 | 0.0000  | 0.0000  |   |
| 0.0000 | 1   | .   |                             |        |        |        |         |         |   |
| 1833   | O   | O   | . ASP ASP ASP A A 244 244 . | 0.0253 | 0.0253 | 0.0253 | 0.0000  | 0.0000  |   |
| 0.0000 | 1   | .   |                             |        |        |        |         |         |   |
| 1834   | N   | N   | . VAL VAL VAL A A 245 245 . | 0.0260 | 0.0254 | 0.0261 | -0.0003 | 0.0007  | - |
| 0.0003 | 1   | .   |                             |        |        |        |         |         |   |
| 1835   | CA  | CA  | . VAL VAL VAL A A 245 245 . | 0.0253 | 0.0253 | 0.0253 | 0.0000  | 0.0000  |   |
| 0.0000 | 1   | .   |                             |        |        |        |         |         |   |
| 1836   | CB  | CB  | . VAL VAL VAL A A 245 245 . | 0.0271 | 0.0261 | 0.0322 | -0.0012 | 0.0035  | - |
| 0.0023 | 1   | .   |                             |        |        |        |         |         |   |
| 1837   | CG1 | CG1 | . VAL VAL VAL A A 245 245 . | 0.0253 | 0.0253 | 0.0253 | 0.0000  | 0.0000  |   |
| 0.0000 | 1   | .   |                             |        |        |        |         |         |   |
| 1838   | CG2 | CG2 | . VAL VAL VAL A A 245 245 . | 0.0260 | 0.0262 | 0.0264 | -0.0008 | 0.0009  | - |
| 0.0010 | 1   | .   |                             |        |        |        |         |         |   |
| 1839   | C   | C   | . VAL VAL VAL A A 245 245 . | 0.0259 | 0.0282 | 0.0260 | -0.0012 | 0.0006  | - |
| 0.0014 | 1   | .   |                             |        |        |        |         |         |   |
| 1840   | O   | O   | . VAL VAL VAL A A 245 245 . | 0.0271 | 0.0253 | 0.0323 | 0.0000  | -0.0018 |   |
| 0.0001 | 1   | .   |                             |        |        |        |         |         |   |
| 1841   | N   | N   | . ALA ALA ALA A A 246 246 . | 0.0320 | 0.0258 | 0.0281 | 0.0018  | -0.0043 | - |
| 0.0012 | 1   | .   |                             |        |        |        |         |         |   |
| 1842   | CA  | CA  | . ALA ALA ALA A A 246 246 . | 0.0279 | 0.0264 | 0.0285 | 0.0017  | -0.0028 | - |
| 0.0019 | 1   | .   |                             |        |        |        |         |         |   |









|        |     |     |                             |        |        |        |         |         |   |
|--------|-----|-----|-----------------------------|--------|--------|--------|---------|---------|---|
| 1933   | N   | N   | . ASP ASP ASP A A 257 257 . | 0.0883 | 0.0959 | 0.0974 | 0.0020  | 0.0017  |   |
| 0.0013 | 1   | .   |                             |        |        |        |         |         |   |
| 1934   | CA  | CA  | . ASP ASP ASP A A 257 257 . | 0.0883 | 0.0920 | 0.1039 | 0.0019  | 0.0030  | - |
| 0.0008 | 1   | .   |                             |        |        |        |         |         |   |
| 1935   | CB  | CB  | . ASP ASP ASP A A 257 257 . | 0.0955 | 0.1069 | 0.1153 | 0.0101  | -0.0043 | - |
| 0.0083 | 1   | .   |                             |        |        |        |         |         |   |
| 1936   | CG  | CG  | . ASP ASP ASP A A 257 257 . | 0.0713 | 0.0968 | 0.1009 | 0.0199  | 0.0002  | - |
| 0.0044 | 1   | .   |                             |        |        |        |         |         |   |
| 1937   | OD1 | OD1 | . ASP ASP ASP A A 257 257 . | 0.0650 | 0.1094 | 0.1131 | -0.0186 | 0.0067  | - |
| 0.0087 | 1   | .   |                             |        |        |        |         |         |   |
| 1938   | OD2 | OD2 | . ASP ASP ASP A A 257 257 . | 0.0881 | 0.0982 | 0.1012 | -0.0122 | -0.0218 |   |
| 0.0002 | 1   | .   |                             |        |        |        |         |         |   |
| 1939   | C   | C   | . ASP ASP ASP A A 257 257 . | 0.0858 | 0.0947 | 0.0862 | 0.0034  | -0.0044 | - |
| 0.0001 | 1   | .   |                             |        |        |        |         |         |   |
| 1940   | O   | O   | . ASP ASP ASP A A 257 257 . | 0.0514 | 0.0659 | 0.0953 | -0.0065 | -0.0027 | - |
| 0.0003 | 1   | .   |                             |        |        |        |         |         |   |
| 1941   | N   | N   | . LEU LEU LEU A A 258 258 . | 0.0704 | 0.0677 | 0.0811 | -0.0116 | -0.0066 |   |
| 0.0006 | 1   | .   |                             |        |        |        |         |         |   |
| 1942   | CA  | CA  | . LEU LEU LEU A A 258 258 . | 0.0916 | 0.0928 | 0.0876 | -0.0029 | 0.0075  |   |
| 0.0031 | 1   | .   |                             |        |        |        |         |         |   |
| 1943   | CB  | CB  | . LEU LEU LEU A A 258 258 . | 0.1013 | 0.0845 | 0.0943 | -0.0155 | -0.0026 |   |
| 0.0024 | 1   | .   |                             |        |        |        |         |         |   |
| 1944   | CG  | CG  | . LEU LEU LEU A A 258 258 . | 0.1050 | 0.0976 | 0.1107 | -0.0201 | -0.0006 | - |
| 0.0048 | 1   | .   |                             |        |        |        |         |         |   |
| 1945   | CD1 | CD1 | . LEU LEU LEU A A 258 258 . | 0.0874 | 0.0948 | 0.0763 | 0.0021  | -0.0050 | - |
| 0.0173 | 1   | .   |                             |        |        |        |         |         |   |
| 1946   | CD2 | CD2 | . LEU LEU LEU A A 258 258 . | 0.0591 | 0.0653 | 0.0952 | -0.0085 | -0.0119 | - |
| 0.0009 | 1   | .   |                             |        |        |        |         |         |   |
| 1947   | C   | C   | . LEU LEU LEU A A 258 258 . | 0.0900 | 0.0831 | 0.0852 | -0.0111 | 0.0048  |   |
| 0.0016 | 1   | .   |                             |        |        |        |         |         |   |
| 1948   | O   | O   | . LEU LEU LEU A A 258 258 . | 0.1003 | 0.1148 | 0.1071 | -0.0139 | 0.0216  |   |
| 0.0198 | 1   | .   |                             |        |        |        |         |         |   |
| 1949   | N   | N   | . ASP ASP ASP A A 259 259 . | 0.0604 | 0.0799 | 0.0952 | -0.0145 | 0.0039  | - |
| 0.0063 | 1   | .   |                             |        |        |        |         |         |   |
| 1950   | CA  | CA  | . ASP ASP ASP A A 259 259 . | 0.0901 | 0.0920 | 0.0917 | -0.0033 | 0.0022  | - |
| 0.0029 | 1   | .   |                             |        |        |        |         |         |   |
| 1951   | CB  | CB  | . ASP ASP ASP A A 259 259 . | 0.0783 | 0.0785 | 0.0937 | 0.0054  | 0.0047  | - |
| 0.0107 | 1   | .   |                             |        |        |        |         |         |   |
| 1952   | CG  | CG  | . ASP ASP ASP A A 259 259 . | 0.1619 | 0.1601 | 0.1423 | -0.0053 | 0.0044  | - |
| 0.0017 | 1   | .   |                             |        |        |        |         |         |   |
| 1953   | OD1 | OD1 | . ASP ASP ASP A A 259 259 . | 0.1779 | 0.1718 | 0.2150 | -0.0096 | 0.0009  |   |
| 0.0313 | 1   | .   |                             |        |        |        |         |         |   |
| 1954   | OD2 | OD2 | . ASP ASP ASP A A 259 259 . | 0.1942 | 0.2107 | 0.2228 | -0.0502 | -0.0065 |   |
| 0.0152 | 1   | .   |                             |        |        |        |         |         |   |
| 1955   | C   | C   | . ASP ASP ASP A A 259 259 . | 0.0974 | 0.0837 | 0.0936 | -0.0049 | 0.0073  | - |
| 0.0019 | 1   | .   |                             |        |        |        |         |         |   |
| 1956   | O   | O   | . ASP ASP ASP A A 259 259 . | 0.0925 | 0.0977 | 0.1078 | -0.0089 | 0.0207  |   |
| 0.0098 | 1   | .   |                             |        |        |        |         |         |   |
| 1957   | N   | N   | . PHE PHE PHE A A 260 260 . | 0.0758 | 0.0690 | 0.0883 | -0.0051 | 0.0125  | - |
| 0.0020 | 1   | .   |                             |        |        |        |         |         |   |
| 1958   | CA  | CA  | . PHE PHE PHE A A 260 260 . | 0.0696 | 0.0711 | 0.0626 | -0.0036 | 0.0118  |   |
| 0.0022 | 1   | .   |                             |        |        |        |         |         |   |
| 1959   | CB  | CB  | . PHE PHE PHE A A 260 260 . | 0.0640 | 0.0766 | 0.0567 | -0.0066 | 0.0083  |   |
| 0.0061 | 1   | .   |                             |        |        |        |         |         |   |
| 1960   | CG  | CG  | . PHE PHE PHE A A 260 260 . | 0.0312 | 0.0299 | 0.0258 | 0.0028  | 0.0015  |   |
| 0.0000 | 1   | .   |                             |        |        |        |         |         |   |
| 1961   | CD1 | CD1 | . PHE PHE PHE A A 260 260 . | 0.0420 | 0.0627 | 0.0729 | -0.0057 | 0.0193  |   |
| 0.0156 | 1   | .   |                             |        |        |        |         |         |   |
| 1962   | CE1 | CE1 | . PHE PHE PHE A A 260 260 . | 0.0375 | 0.0290 | 0.0622 | 0.0066  | -0.0160 | - |
| 0.0100 | 1   | .   |                             |        |        |        |         |         |   |





|        |     |     |                             |        |        |        |         |         |   |
|--------|-----|-----|-----------------------------|--------|--------|--------|---------|---------|---|
| 2023   | NE  | NE  | . ARG ARG ARG A A 268 268 . | 0.0859 | 0.1392 | 0.1405 | 0.0150  | 0.0082  | - |
| 0.0234 | 1   | .   |                             |        |        |        |         |         |   |
| 2024   | CZ  | CZ  | . ARG ARG ARG A A 268 268 . | 0.1426 | 0.1504 | 0.1550 | -0.0029 | 0.0107  | - |
| 0.0101 | 1   | .   |                             |        |        |        |         |         |   |
| 2025   | NH1 | NH1 | . ARG ARG ARG A A 268 268 . | 0.1460 | 0.1613 | 0.2026 | 0.0168  | 0.0414  | - |
| 0.0147 | 1   | .   |                             |        |        |        |         |         |   |
| 2026   | NH2 | NH2 | . ARG ARG ARG A A 268 268 . | 0.1258 | 0.1444 | 0.1195 | 0.0127  | 0.0358  |   |
| 0.0066 | 1   | .   |                             |        |        |        |         |         |   |
| 2027   | C   | C   | . ARG ARG ARG A A 268 268 . | 0.1631 | 0.1539 | 0.1723 | -0.0091 | 0.0023  | - |
| 0.0013 | 1   | .   |                             |        |        |        |         |         |   |
| 2028   | O   | O   | . ARG ARG ARG A A 268 268 . | 0.1471 | 0.1564 | 0.2044 | -0.0237 | 0.0088  |   |
| 0.0103 | 1   | .   |                             |        |        |        |         |         |   |
| 2029   | N   | N   | . TYR TYR TYR A A 269 269 . | 0.1366 | 0.1549 | 0.1754 | -0.0042 | -0.0087 |   |
| 0.0125 | 1   | .   |                             |        |        |        |         |         |   |
| 2030   | CA  | CA  | . TYR TYR TYR A A 269 269 . | 0.1413 | 0.1506 | 0.1520 | 0.0034  | 0.0035  |   |
| 0.0003 | 1   | .   |                             |        |        |        |         |         |   |
| 2031   | CB  | CB  | . TYR TYR TYR A A 269 269 . | 0.1423 | 0.1436 | 0.1458 | 0.0056  | 0.0045  |   |
| 0.0160 | 1   | .   |                             |        |        |        |         |         |   |
| 2032   | CG  | CG  | . TYR TYR TYR A A 269 269 . | 0.1098 | 0.1532 | 0.1663 | 0.0013  | 0.0213  |   |
| 0.0014 | 1   | .   |                             |        |        |        |         |         |   |
| 2033   | CD1 | CD1 | . TYR TYR TYR A A 269 269 . | 0.1471 | 0.1742 | 0.1740 | -0.0135 | 0.0020  |   |
| 0.0134 | 1   | .   |                             |        |        |        |         |         |   |
| 2034   | CE1 | CE1 | . TYR TYR TYR A A 269 269 . | 0.1161 | 0.1919 | 0.1828 | 0.0133  | 0.0222  | - |
| 0.0109 | 1   | .   |                             |        |        |        |         |         |   |
| 2035   | CZ  | CZ  | . TYR TYR TYR A A 269 269 . | 0.1684 | 0.2247 | 0.2207 | -0.0335 | 0.0128  |   |
| 0.0122 | 1   | .   |                             |        |        |        |         |         |   |
| 2036   | OH  | OH  | . TYR TYR TYR A A 269 269 . | 0.2347 | 0.3050 | 0.2785 | -0.0123 | 0.0416  | - |
| 0.0391 | 1   | .   |                             |        |        |        |         |         |   |
| 2037   | CE2 | CE2 | . TYR TYR TYR A A 269 269 . | 0.1434 | 0.1758 | 0.1908 | -0.0192 | 0.0191  |   |
| 0.0019 | 1   | .   |                             |        |        |        |         |         |   |
| 2038   | CD2 | CD2 | . TYR TYR TYR A A 269 269 . | 0.1553 | 0.1748 | 0.1770 | -0.0181 | 0.0046  |   |
| 0.0039 | 1   | .   |                             |        |        |        |         |         |   |
| 2039   | C   | C   | . TYR TYR TYR A A 269 269 . | 0.1281 | 0.1426 | 0.1346 | 0.0047  | -0.0015 |   |
| 0.0062 | 1   | .   |                             |        |        |        |         |         |   |
| 2040   | O   | O   | . TYR TYR TYR A A 269 269 . | 0.1423 | 0.1581 | 0.1551 | -0.0179 | -0.0085 | - |
| 0.0147 | 1   | .   |                             |        |        |        |         |         |   |
| 2041   | N   | N   | . ILE ILE ILE A A 270 270 . | 0.0933 | 0.1350 | 0.1145 | -0.0060 | -0.0124 |   |
| 0.0114 | 1   | .   |                             |        |        |        |         |         |   |
| 2042   | CA  | CA  | . ILE ILE ILE A A 270 270 . | 0.0930 | 0.1051 | 0.1028 | -0.0062 | 0.0007  |   |
| 0.0000 | 1   | .   |                             |        |        |        |         |         |   |
| 2043   | CB  | CB  | . ILE ILE ILE A A 270 270 . | 0.0849 | 0.1095 | 0.1058 | -0.0066 | -0.0020 |   |
| 0.0040 | 1   | .   |                             |        |        |        |         |         |   |
| 2044   | CG1 | CG1 | . ILE ILE ILE A A 270 270 . | 0.0600 | 0.0889 | 0.0743 | 0.0040  | 0.0029  |   |
| 0.0017 | 1   | .   |                             |        |        |        |         |         |   |
| 2045   | CD1 | CD1 | . ILE ILE ILE A A 270 270 . | 0.0919 | 0.0939 | 0.1417 | -0.0279 | -0.0123 | - |
| 0.0088 | 1   | .   |                             |        |        |        |         |         |   |
| 2046   | CG2 | CG2 | . ILE ILE ILE A A 270 270 . | 0.0814 | 0.1214 | 0.1236 | 0.0089  | 0.0001  |   |
| 0.0049 | 1   | .   |                             |        |        |        |         |         |   |
| 2047   | C   | C   | . ILE ILE ILE A A 270 270 . | 0.1086 | 0.1050 | 0.1182 | 0.0003  | -0.0103 |   |
| 0.0017 | 1   | .   |                             |        |        |        |         |         |   |
| 2048   | O   | O   | . ILE ILE ILE A A 270 270 . | 0.1209 | 0.1102 | 0.1330 | -0.0013 | -0.0094 | - |
| 0.0032 | 1   | .   |                             |        |        |        |         |         |   |
| 2049   | N   | N   | . THR THR THR A A 271 271 . | 0.0902 | 0.0940 | 0.1104 | -0.0082 | 0.0031  | - |
| 0.0057 | 1   | .   |                             |        |        |        |         |         |   |
| 2050   | CA  | CA  | . THR THR THR A A 271 271 . | 0.1192 | 0.1231 | 0.1272 | 0.0079  | -0.0028 |   |
| 0.0023 | 1   | .   |                             |        |        |        |         |         |   |
| 2051   | CB  | CB  | . THR THR THR A A 271 271 . | 0.1186 | 0.1309 | 0.1341 | 0.0096  | 0.0018  | - |
| 0.0056 | 1   | .   |                             |        |        |        |         |         |   |
| 2052   | OG1 | OG1 | . THR THR THR A A 271 271 . | 0.1276 | 0.1648 | 0.2049 | -0.0099 | -0.0224 | - |
| 0.0273 | 1   | .   |                             |        |        |        |         |         |   |



|        |     |     |                             |        |        |        |         |         |   |
|--------|-----|-----|-----------------------------|--------|--------|--------|---------|---------|---|
| 2083   | C   | C   | . LEU LEU LEU A A 275 275 . | 0.0817 | 0.0855 | 0.0916 | 0.0028  | -0.0123 | - |
| 0.0051 | 1   | .   |                             |        |        |        |         |         |   |
| 2084   | O   | O   | . LEU LEU LEU A A 275 275 . | 0.1199 | 0.1049 | 0.1109 | 0.0065  | -0.0148 | - |
| 0.0059 | 1   | .   |                             |        |        |        |         |         |   |
| 2085   | N   | N   | . GLY GLY GLY A A 276 276 . | 0.0630 | 0.0865 | 0.0694 | -0.0028 | 0.0019  | - |
| 0.0017 | 1   | .   |                             |        |        |        |         |         |   |
| 2086   | CA  | CA  | . GLY GLY GLY A A 276 276 . | 0.0865 | 0.0965 | 0.0877 | 0.0060  | -0.0077 | - |
| 0.0116 | 1   | .   |                             |        |        |        |         |         |   |
| 2087   | C   | C   | . GLY GLY GLY A A 276 276 . | 0.0878 | 0.0871 | 0.0908 | -0.0039 | -0.0034 | - |
| 0.0013 | 1   | .   |                             |        |        |        |         |         |   |
| 2088   | O   | O   | . GLY GLY GLY A A 276 276 . | 0.0748 | 0.0984 | 0.1038 | -0.0098 | -0.0019 | - |
| 0.0237 | 1   | .   |                             |        |        |        |         |         |   |
| 2089   | N   | N   | . ALA ALA ALA A A 277 277 . | 0.0565 | 0.0947 | 0.0805 | -0.0109 | 0.0020  | - |
| 0.0071 | 1   | .   |                             |        |        |        |         |         |   |
| 2090   | CA  | CA  | . ALA ALA ALA A A 277 277 . | 0.0670 | 0.0771 | 0.0885 | -0.0026 | 0.0133  | - |
| 0.0085 | 1   | .   |                             |        |        |        |         |         |   |
| 2091   | CB  | CB  | . ALA ALA ALA A A 277 277 . | 0.0841 | 0.1041 | 0.1025 | -0.0114 | -0.0055 | - |
| 0.0096 | 1   | .   |                             |        |        |        |         |         |   |
| 2092   | C   | C   | . ALA ALA ALA A A 277 277 . | 0.0606 | 0.0760 | 0.0696 | -0.0012 | -0.0127 | - |
| 0.0112 | 1   | .   |                             |        |        |        |         |         |   |
| 2093   | O   | O   | . ALA ALA ALA A A 277 277 . | 0.0897 | 0.1208 | 0.1189 | 0.0057  | -0.0133 | - |
| 0.0067 | 1   | .   |                             |        |        |        |         |         |   |
| 2094   | N   | N   | . LEU LEU LEU A A 278 278 . | 0.0877 | 0.0964 | 0.1078 | -0.0083 | 0.0095  | - |
| 0.0134 | 1   | .   |                             |        |        |        |         |         |   |
| 2095   | CA  | CA  | . LEU LEU LEU A A 278 278 . | 0.0728 | 0.1085 | 0.0817 | -0.0018 | 0.0008  | - |
| 0.0005 | 1   | .   |                             |        |        |        |         |         |   |
| 2096   | CB  | CB  | . LEU LEU LEU A A 278 278 . | 0.1321 | 0.1436 | 0.1288 | -0.0106 | 0.0066  | - |
| 0.0066 | 1   | .   |                             |        |        |        |         |         |   |
| 2097   | CG  | CG  | . LEU LEU LEU A A 278 278 . | 0.1699 | 0.1391 | 0.1542 | -0.0198 | 0.0123  | - |
| 0.0038 | 1   | .   |                             |        |        |        |         |         |   |
| 2098   | CD1 | CD1 | . LEU LEU LEU A A 278 278 . | 0.1965 | 0.1588 | 0.2294 | -0.0586 | 0.0028  | - |
| 0.0068 | 1   | .   |                             |        |        |        |         |         |   |
| 2099   | CD2 | CD2 | . LEU LEU LEU A A 278 278 . | 0.2235 | 0.2162 | 0.1761 | 0.0255  | 0.0297  | - |
| 0.0195 | 1   | .   |                             |        |        |        |         |         |   |
| 2100   | C   | C   | . LEU LEU LEU A A 278 278 . | 0.0663 | 0.0754 | 0.0546 | -0.0039 | 0.0000  | - |
| 0.0027 | 1   | .   |                             |        |        |        |         |         |   |
| 2101   | O   | O   | . LEU LEU LEU A A 278 278 . | 0.0686 | 0.0664 | 0.0588 | -0.0120 | -0.0004 | - |
| 0.0135 | 1   | .   |                             |        |        |        |         |         |   |
| 2102   | N   | N   | . TYR TYR TYR A A 279 279 . | 0.0423 | 0.0510 | 0.0397 | -0.0028 | -0.0031 | - |
| 0.0008 | 1   | .   |                             |        |        |        |         |         |   |
| 2103   | CA  | CA  | . TYR TYR TYR A A 279 279 . | 0.0452 | 0.0551 | 0.0336 | -0.0020 | -0.0038 | - |
| 0.0056 | 1   | .   |                             |        |        |        |         |         |   |
| 2104   | CB  | CB  | . TYR TYR TYR A A 279 279 . | 0.0474 | 0.0502 | 0.0547 | -0.0034 | 0.0119  | - |
| 0.0145 | 1   | .   |                             |        |        |        |         |         |   |
| 2105   | CG  | CG  | . TYR TYR TYR A A 279 279 . | 0.0476 | 0.0442 | 0.0363 | -0.0074 | 0.0117  | - |
| 0.0049 | 1   | .   |                             |        |        |        |         |         |   |
| 2106   | CD1 | CD1 | . TYR TYR TYR A A 279 279 . | 0.0349 | 0.0338 | 0.0272 | 0.0006  | -0.0029 | - |
| 0.0023 | 1   | .   |                             |        |        |        |         |         |   |
| 2107   | CE1 | CE1 | . TYR TYR TYR A A 279 279 . | 0.0423 | 0.0412 | 0.0510 | -0.0162 | -0.0066 | - |
| 0.0039 | 1   | .   |                             |        |        |        |         |         |   |
| 2108   | CZ  | CZ  | . TYR TYR TYR A A 279 279 . | 0.0355 | 0.0340 | 0.0522 | 0.0094  | -0.0030 | - |
| 0.0029 | 1   | .   |                             |        |        |        |         |         |   |
| 2109   | OH  | OH  | . TYR TYR TYR A A 279 279 . | 0.0354 | 0.0476 | 0.0360 | 0.0007  | -0.0086 | - |
| 0.0093 | 1   | .   |                             |        |        |        |         |         |   |
| 2110   | CE2 | CE2 | . TYR TYR TYR A A 279 279 . | 0.0253 | 0.0253 | 0.0253 | 0.0000  | 0.0000  | - |
| 0.0000 | 1   | .   |                             |        |        |        |         |         |   |
| 2111   | CD2 | CD2 | . TYR TYR TYR A A 279 279 . | 0.0253 | 0.0253 | 0.0253 | 0.0000  | 0.0000  | - |
| 0.0000 | 1   | .   |                             |        |        |        |         |         |   |
| 2112   | C   | C   | . TYR TYR TYR A A 279 279 . | 0.0426 | 0.0511 | 0.0531 | 0.0009  | -0.0035 | - |
| 0.0127 | 1   | .   |                             |        |        |        |         |         |   |

|        |     |     |                             |        |        |        |         |         |   |
|--------|-----|-----|-----------------------------|--------|--------|--------|---------|---------|---|
| 2113   | O   | O   | . TYR TYR TYR A A 279 279 . | 0.0499 | 0.0471 | 0.0586 | -0.0182 | -0.0010 | - |
| 0.0140 | 1   | .   |                             |        |        |        |         |         |   |
| 2114   | N   | N   | . GLN GLN GLN A A 280 280 . | 0.0457 | 0.0626 | 0.0401 | -0.0007 | -0.0068 | - |
| 0.0056 | 1   | .   |                             |        |        |        |         |         |   |
| 2115   | CA  | CA  | . GLN GLN GLN A A 280 280 . | 0.0703 | 0.0782 | 0.0808 | -0.0037 | -0.0091 | - |
| 0.0109 | 1   | .   |                             |        |        |        |         |         |   |
| 2116   | CB  | CB  | . GLN GLN GLN A A 280 280 . | 0.0864 | 0.0813 | 0.0609 | 0.0153  | -0.0129 | - |
| 0.0025 | 1   | .   |                             |        |        |        |         |         |   |
| 2117   | CG  | CG  | . GLN GLN GLN A A 280 280 . | 0.1217 | 0.1016 | 0.0906 | -0.0025 | -0.0182 | - |
| 0.0000 | 1   | .   |                             |        |        |        |         |         |   |
| 2118   | CD  | CD  | . GLN GLN GLN A A 280 280 . | 0.1059 | 0.1316 | 0.1483 | 0.0044  | -0.0111 | - |
| 0.0025 | 1   | .   |                             |        |        |        |         |         |   |
| 2119   | OE1 | OE1 | . GLN GLN GLN A A 280 280 . | 0.1695 | 0.1494 | 0.1783 | 0.0123  | -0.0341 | - |
| 0.0216 | 1   | .   |                             |        |        |        |         |         |   |
| 2120   | NE2 | NE2 | . GLN GLN GLN A A 280 280 . | 0.1372 | 0.1426 | 0.0902 | 0.0330  | 0.0016  | - |
| 0.0031 | 1   | .   |                             |        |        |        |         |         |   |
| 2121   | C   | C   | . GLN GLN GLN A A 280 280 . | 0.0713 | 0.0812 | 0.0740 | -0.0036 | -0.0029 | - |
| 0.0035 | 1   | .   |                             |        |        |        |         |         |   |
| 2122   | O   | O   | . GLN GLN GLN A A 280 280 . | 0.0626 | 0.0633 | 0.0699 | -0.0137 | -0.0130 | - |
| 0.0240 | 1   | .   |                             |        |        |        |         |         |   |
| 2123   | N   | N   | . ASP ASP ASP A A 281 281 . | 0.0678 | 0.0830 | 0.0672 | -0.0122 | -0.0044 | - |
| 0.0008 | 1   | .   |                             |        |        |        |         |         |   |
| 2124   | CA  | CA  | . ASP ASP ASP A A 281 281 . | 0.0996 | 0.0919 | 0.0763 | 0.0072  | -0.0069 | - |
| 0.0164 | 1   | .   |                             |        |        |        |         |         |   |
| 2125   | CB  | CB  | . ASP ASP ASP A A 281 281 . | 0.1065 | 0.0990 | 0.1330 | -0.0066 | 0.0008  | - |
| 0.0082 | 1   | .   |                             |        |        |        |         |         |   |
| 2126   | CG  | CG  | . ASP ASP ASP A A 281 281 . | 0.1956 | 0.2047 | 0.1863 | 0.0128  | -0.0149 | - |
| 0.0100 | 1   | .   |                             |        |        |        |         |         |   |
| 2127   | OD1 | OD1 | . ASP ASP ASP A A 281 281 . | 0.2741 | 0.2813 | 0.2406 | 0.0111  | -0.0076 | - |
| 0.0270 | 1   | .   |                             |        |        |        |         |         |   |
| 2128   | OD2 | OD2 | . ASP ASP ASP A A 281 281 . | 0.2389 | 0.3847 | 0.3237 | 0.0187  | 0.0244  | - |
| 0.0074 | 1   | .   |                             |        |        |        |         |         |   |
| 2129   | C   | C   | . ASP ASP ASP A A 281 281 . | 0.0769 | 0.0848 | 0.0801 | 0.0049  | -0.0055 | - |
| 0.0113 | 1   | .   |                             |        |        |        |         |         |   |
| 2130   | O   | O   | . ASP ASP ASP A A 281 281 . | 0.0833 | 0.0805 | 0.0669 | 0.0016  | -0.0132 | - |
| 0.0242 | 1   | .   |                             |        |        |        |         |         |   |
| 2131   | N   | N   | . PHE PHE PHE A A 282 282 . | 0.0716 | 0.0788 | 0.0744 | -0.0028 | -0.0057 | - |
| 0.0284 | 1   | .   |                             |        |        |        |         |         |   |
| 2132   | CA  | CA  | . PHE PHE PHE A A 282 282 . | 0.0652 | 0.0641 | 0.0524 | 0.0038  | 0.0029  | - |
| 0.0060 | 1   | .   |                             |        |        |        |         |         |   |
| 2133   | CB  | CB  | . PHE PHE PHE A A 282 282 . | 0.0802 | 0.0880 | 0.0955 | -0.0095 | -0.0042 | - |
| 0.0104 | 1   | .   |                             |        |        |        |         |         |   |
| 2134   | CG  | CG  | . PHE PHE PHE A A 282 282 . | 0.1021 | 0.0998 | 0.1020 | -0.0135 | 0.0066  | - |
| 0.0011 | 1   | .   |                             |        |        |        |         |         |   |
| 2135   | CD1 | CD1 | . PHE PHE PHE A A 282 282 . | 0.1479 | 0.1316 | 0.1330 | -0.0009 | 0.0053  | - |
| 0.0101 | 1   | .   |                             |        |        |        |         |         |   |
| 2136   | CE1 | CE1 | . PHE PHE PHE A A 282 282 . | 0.1850 | 0.1662 | 0.1500 | -0.0189 | -0.0051 | - |
| 0.0243 | 1   | .   |                             |        |        |        |         |         |   |
| 2137   | CZ  | CZ  | . PHE PHE PHE A A 282 282 . | 0.1431 | 0.1755 | 0.1342 | 0.0011  | 0.0286  | - |
| 0.0120 | 1   | .   |                             |        |        |        |         |         |   |
| 2138   | CE2 | CE2 | . PHE PHE PHE A A 282 282 . | 0.1710 | 0.1815 | 0.1477 | 0.0147  | 0.0012  | - |
| 0.0099 | 1   | .   |                             |        |        |        |         |         |   |
| 2139   | CD2 | CD2 | . PHE PHE PHE A A 282 282 . | 0.1113 | 0.1005 | 0.1258 | 0.0195  | 0.0174  | - |
| 0.0059 | 1   | .   |                             |        |        |        |         |         |   |
| 2140   | C   | C   | . PHE PHE PHE A A 282 282 . | 0.0662 | 0.0725 | 0.0693 | -0.0024 | -0.0116 | - |
| 0.0127 | 1   | .   |                             |        |        |        |         |         |   |
| 2141   | O   | O   | . PHE PHE PHE A A 282 282 . | 0.0585 | 0.0687 | 0.0742 | -0.0002 | 0.0047  | - |
| 0.0087 | 1   | .   |                             |        |        |        |         |         |   |
| 2142   | N   | N   | . VAL VAL VAL A A 283 283 . | 0.0481 | 0.0463 | 0.0350 | -0.0179 | 0.0017  | - |
| 0.0095 | 1   | .   |                             |        |        |        |         |         |   |

















|        |     |     |                             |        |        |        |         |         |   |
|--------|-----|-----|-----------------------------|--------|--------|--------|---------|---------|---|
| 2353   | O   | O   | . THR THR THR A A 307 307 . | 0.0742 | 0.0838 | 0.0706 | 0.0022  | -0.0083 | - |
| 0.0031 | 1   | .   |                             |        |        |        |         |         |   |
| 2354   | N   | N   | . ALA ALA ALA A A 308 308 . | 0.0871 | 0.0887 | 0.0692 | 0.0061  | -0.0054 |   |
| 0.0007 | 1   | .   |                             |        |        |        |         |         |   |
| 2355   | CA  | CA  | . ALA ALA ALA A A 308 308 . | 0.1045 | 0.1022 | 0.0960 | 0.0051  | -0.0022 |   |
| 0.0010 | 1   | .   |                             |        |        |        |         |         |   |
| 2356   | CB  | CB  | . ALA ALA ALA A A 308 308 . | 0.0631 | 0.0640 | 0.0750 | 0.0054  | -0.0057 |   |
| 0.0056 | 1   | .   |                             |        |        |        |         |         |   |
| 2357   | C   | C   | . ALA ALA ALA A A 308 308 . | 0.1299 | 0.1207 | 0.1210 | -0.0039 | 0.0024  | - |
| 0.0067 | 1   | .   |                             |        |        |        |         |         |   |
| 2358   | O   | O   | . ALA ALA ALA A A 308 308 . | 0.1764 | 0.1320 | 0.1216 | -0.0139 | 0.0060  |   |
| 0.0046 | 1   | .   |                             |        |        |        |         |         |   |
| 2359   | N   | N   | . ASN ASN ASN A A 309 309 . | 0.1539 | 0.1174 | 0.1293 | -0.0030 | 0.0143  | - |
| 0.0122 | 1   | .   |                             |        |        |        |         |         |   |
| 2360   | CA  | CA  | . ASN ASN ASN A A 309 309 . | 0.1490 | 0.1563 | 0.1492 | -0.0031 | -0.0034 | - |
| 0.0130 | 1   | .   |                             |        |        |        |         |         |   |
| 2361   | CB  | CB  | . ASN ASN ASN A A 309 309 . | 0.1798 | 0.1863 | 0.1831 | -0.0050 | 0.0014  | - |
| 0.0098 | 1   | .   |                             |        |        |        |         |         |   |
| 2362   | CG  | CG  | . ASN ASN ASN A A 309 309 . | 0.2596 | 0.2642 | 0.2704 | 0.0217  | -0.0168 | - |
| 0.0058 | 1   | .   |                             |        |        |        |         |         |   |
| 2363   | OD1 | OD1 | . ASN ASN ASN A A 309 309 . | 0.3335 | 0.3490 | 0.3677 | 0.0361  | -0.0011 | - |
| 0.0330 | 1   | .   |                             |        |        |        |         |         |   |
| 2364   | ND2 | ND2 | . ASN ASN ASN A A 309 309 . | 0.2905 | 0.3425 | 0.2693 | 0.0178  | -0.0146 | - |
| 0.0065 | 1   | .   |                             |        |        |        |         |         |   |
| 2365   | C   | C   | . ASN ASN ASN A A 309 309 . | 0.1332 | 0.1147 | 0.1361 | -0.0049 | 0.0015  | - |
| 0.0102 | 1   | .   |                             |        |        |        |         |         |   |
| 2366   | O   | O   | . ASN ASN ASN A A 309 309 . | 0.1639 | 0.1681 | 0.1650 | -0.0302 | -0.0076 | - |
| 0.0091 | 1   | .   |                             |        |        |        |         |         |   |
| 2367   | N   | N   | . VAL VAL VAL A A 310 310 . | 0.0982 | 0.0921 | 0.0822 | -0.0049 | -0.0060 | - |
| 0.0072 | 1   | .   |                             |        |        |        |         |         |   |
| 2368   | CA  | CA  | . VAL VAL VAL A A 310 310 . | 0.0959 | 0.0898 | 0.0834 | 0.0024  | -0.0056 | - |
| 0.0065 | 1   | .   |                             |        |        |        |         |         |   |
| 2369   | CB  | CB  | . VAL VAL VAL A A 310 310 . | 0.1293 | 0.1162 | 0.1093 | 0.0057  | -0.0081 | - |
| 0.0008 | 1   | .   |                             |        |        |        |         |         |   |
| 2370   | CG1 | CG1 | . VAL VAL VAL A A 310 310 . | 0.1600 | 0.1701 | 0.1453 | -0.0048 | 0.0121  |   |
| 0.0072 | 1   | .   |                             |        |        |        |         |         |   |
| 2371   | CG2 | CG2 | . VAL VAL VAL A A 310 310 . | 0.1492 | 0.1209 | 0.1421 | -0.0047 | -0.0288 |   |
| 0.0012 | 1   | .   |                             |        |        |        |         |         |   |
| 2372   | C   | C   | . VAL VAL VAL A A 310 310 . | 0.1008 | 0.0830 | 0.0814 | -0.0071 | -0.0044 |   |
| 0.0000 | 1   | .   |                             |        |        |        |         |         |   |
| 2373   | O   | O   | . VAL VAL VAL A A 310 310 . | 0.0986 | 0.1009 | 0.0938 | -0.0164 | -0.0095 |   |
| 0.0086 | 1   | .   |                             |        |        |        |         |         |   |
| 2374   | N   | N   | . GLY GLY GLY A A 311 311 . | 0.0674 | 0.0663 | 0.0391 | -0.0045 | -0.0101 | - |
| 0.0084 | 1   | .   |                             |        |        |        |         |         |   |
| 2375   | CA  | CA  | . GLY GLY GLY A A 311 311 . | 0.0696 | 0.0530 | 0.0523 | -0.0123 | -0.0141 | - |
| 0.0193 | 1   | .   |                             |        |        |        |         |         |   |
| 2376   | C   | C   | . GLY GLY GLY A A 311 311 . | 0.0558 | 0.0664 | 0.0652 | 0.0049  | 0.0005  |   |
| 0.0025 | 1   | .   |                             |        |        |        |         |         |   |
| 2377   | O   | O   | . GLY GLY GLY A A 311 311 . | 0.1088 | 0.1126 | 0.0950 | -0.0006 | -0.0108 | - |
| 0.0164 | 1   | .   |                             |        |        |        |         |         |   |
| 2378   | N   | N   | . ILE ILE ILE A A 312 312 . | 0.0585 | 0.0479 | 0.0445 | -0.0018 | -0.0107 | - |
| 0.0028 | 1   | .   |                             |        |        |        |         |         |   |
| 2379   | CA  | CA  | . ILE ILE ILE A A 312 312 . | 0.0538 | 0.0465 | 0.0469 | -0.0003 | -0.0126 | - |
| 0.0004 | 1   | .   |                             |        |        |        |         |         |   |
| 2380   | CB  | CB  | . ILE ILE ILE A A 312 312 . | 0.0540 | 0.0483 | 0.0657 | -0.0038 | 0.0005  | - |
| 0.0082 | 1   | .   |                             |        |        |        |         |         |   |
| 2381   | CG1 | CG1 | . ILE ILE ILE A A 312 312 . | 0.0621 | 0.0556 | 0.0641 | 0.0064  | 0.0058  | - |
| 0.0281 | 1   | .   |                             |        |        |        |         |         |   |
| 2382   | CD1 | CD1 | . ILE ILE ILE A A 312 312 . | 0.1486 | 0.0897 | 0.1022 | 0.0014  | 0.0057  | - |
| 0.0319 | 1   | .   |                             |        |        |        |         |         |   |















|        |     |     |                             |        |        |        |         |         |   |
|--------|-----|-----|-----------------------------|--------|--------|--------|---------|---------|---|
| 2563   | CB  | CB  | . ALA ALA ALA A A 335 335 . | 0.0762 | 0.0653 | 0.0733 | 0.0161  | -0.0046 | - |
| 0.0086 | 1   | .   |                             |        |        |        |         |         |   |
| 2564   | C   | C   | . ALA ALA ALA A A 335 335 . | 0.0565 | 0.0652 | 0.0804 | -0.0028 | -0.0057 |   |
| 0.0040 | 1   | .   |                             |        |        |        |         |         |   |
| 2565   | O   | O   | . ALA ALA ALA A A 335 335 . | 0.1033 | 0.1015 | 0.0835 | 0.0082  | -0.0244 |   |
| 0.0082 | 1   | .   |                             |        |        |        |         |         |   |
| 2566   | N   | N   | . CYS CYS CYS A A 336 336 . | 0.0753 | 0.0721 | 0.0532 | 0.0133  | -0.0068 |   |
| 0.0005 | 1   | .   |                             |        |        |        |         |         |   |
| 2567   | CA  | CA  | . CYS CYS CYS A A 336 336 . | 0.0393 | 0.0557 | 0.0443 | 0.0146  | -0.0012 |   |
| 0.0002 | 1   | .   |                             |        |        |        |         |         |   |
| 2568   | CB  | CB  | . CYS CYS CYS A A 336 336 . | 0.0409 | 0.0469 | 0.0339 | 0.0146  | -0.0115 | - |
| 0.0101 | 1   | .   |                             |        |        |        |         |         |   |
| 2569   | SG  | SG  | . CYS CYS CYS A A 336 336 . | 0.0788 | 0.0658 | 0.0668 | 0.0042  | -0.0020 |   |
| 0.0037 | 1   | .   |                             |        |        |        |         |         |   |
| 2570   | C   | C   | . CYS CYS CYS A A 336 336 . | 0.0621 | 0.0437 | 0.0325 | 0.0127  | 0.0090  |   |
| 0.0011 | 1   | .   |                             |        |        |        |         |         |   |
| 2571   | O   | O   | . CYS CYS CYS A A 336 336 . | 0.0833 | 0.0658 | 0.0679 | 0.0058  | 0.0035  | - |
| 0.0053 | 1   | .   |                             |        |        |        |         |         |   |
| 2572   | N   | N   | . ASN ASN ASN A A 337 337 . | 0.0546 | 0.0628 | 0.0346 | 0.0140  | -0.0045 |   |
| 0.0023 | 1   | .   |                             |        |        |        |         |         |   |
| 2573   | CA  | CA  | . ASN ASN ASN A A 337 337 . | 0.0253 | 0.0253 | 0.0253 | 0.0000  | 0.0000  |   |
| 0.0000 | 1   | .   |                             |        |        |        |         |         |   |
| 2574   | CB  | CB  | . ASN ASN ASN A A 337 337 . | 0.0275 | 0.0259 | 0.0261 | -0.0002 | -0.0011 | - |
| 0.0002 | 1   | .   |                             |        |        |        |         |         |   |
| 2575   | CG  | CG  | . ASN ASN ASN A A 337 337 . | 0.0709 | 0.0602 | 0.0624 | 0.0038  | -0.0203 |   |
| 0.0220 | 1   | .   |                             |        |        |        |         |         |   |
| 2576   | OD1 | OD1 | . ASN ASN ASN A A 337 337 . | 0.1022 | 0.0886 | 0.0950 | -0.0279 | -0.0112 |   |
| 0.0068 | 1   | .   |                             |        |        |        |         |         |   |
| 2577   | ND2 | ND2 | . ASN ASN ASN A A 337 337 . | 0.0260 | 0.0260 | 0.0255 | -0.0007 | 0.0004  | - |
| 0.0003 | 1   | .   |                             |        |        |        |         |         |   |
| 2578   | C   | C   | . ASN ASN ASN A A 337 337 . | 0.0272 | 0.0279 | 0.0257 | 0.0022  | 0.0009  |   |
| 0.0010 | 1   | .   |                             |        |        |        |         |         |   |
| 2579   | O   | O   | . ASN ASN ASN A A 337 337 . | 0.0305 | 0.0283 | 0.0286 | 0.0039  | -0.0041 | - |
| 0.0031 | 1   | .   |                             |        |        |        |         |         |   |
| 2580   | N   | N   | . CYS CYS CYS A A 338 338 . | 0.0253 | 0.0253 | 0.0253 | 0.0000  | 0.0000  |   |
| 0.0000 | 1   | .   |                             |        |        |        |         |         |   |
| 2581   | CA  | CA  | . CYS CYS CYS A A 338 338 . | 0.0253 | 0.0253 | 0.0253 | 0.0000  | 0.0000  |   |
| 0.0000 | 1   | .   |                             |        |        |        |         |         |   |
| 2582   | CB  | CB  | . CYS CYS CYS A A 338 338 . | 0.0253 | 0.0253 | 0.0253 | 0.0000  | 0.0000  |   |
| 0.0000 | 1   | .   |                             |        |        |        |         |         |   |
| 2583   | SG  | SG  | . CYS CYS CYS A A 338 338 . | 0.0305 | 0.0287 | 0.0279 | 0.0042  | -0.0036 | - |
| 0.0029 | 1   | .   |                             |        |        |        |         |         |   |
| 2584   | C   | C   | . CYS CYS CYS A A 338 338 . | 0.0253 | 0.0253 | 0.0253 | 0.0000  | 0.0000  |   |
| 0.0000 | 1   | .   |                             |        |        |        |         |         |   |
| 2585   | O   | O   | . CYS CYS CYS A A 338 338 . | 0.0253 | 0.0253 | 0.0253 | 0.0000  | 0.0000  |   |
| 0.0000 | 1   | .   |                             |        |        |        |         |         |   |
| 2586   | N   | N   | . LEU LEU LEU A A 339 339 . | 0.0253 | 0.0253 | 0.0253 | 0.0000  | 0.0000  |   |
| 0.0000 | 1   | .   |                             |        |        |        |         |         |   |
| 2587   | CA  | CA  | . LEU LEU LEU A A 339 339 . | 0.0253 | 0.0253 | 0.0253 | 0.0000  | 0.0000  |   |
| 0.0000 | 1   | .   |                             |        |        |        |         |         |   |
| 2588   | CB  | CB  | . LEU LEU LEU A A 339 339 . | 0.0337 | 0.0295 | 0.0256 | 0.0051  | -0.0009 | - |
| 0.0010 | 1   | .   |                             |        |        |        |         |         |   |
| 2589   | CG  | CG  | . LEU LEU LEU A A 339 339 . | 0.0280 | 0.0326 | 0.0253 | -0.0044 | 0.0001  | - |
| 0.0002 | 1   | .   |                             |        |        |        |         |         |   |
| 2590   | CD1 | CD1 | . LEU LEU LEU A A 339 339 . | 0.0304 | 0.0331 | 0.0298 | 0.0063  | 0.0047  |   |
| 0.0059 | 1   | .   |                             |        |        |        |         |         |   |
| 2591   | CD2 | CD2 | . LEU LEU LEU A A 339 339 . | 0.0271 | 0.0276 | 0.0294 | -0.0020 | -0.0026 |   |
| 0.0030 | 1   | .   |                             |        |        |        |         |         |   |
| 2592   | C   | C   | . LEU LEU LEU A A 339 339 . | 0.0253 | 0.0253 | 0.0253 | 0.0000  | 0.0000  |   |
| 0.0000 | 1   | .   |                             |        |        |        |         |         |   |







|        |     |     |                             |        |        |        |         |         |   |
|--------|-----|-----|-----------------------------|--------|--------|--------|---------|---------|---|
| 2653   | C   | C   | . GLY GLY GLY A A 347 347 . | 0.0253 | 0.0253 | 0.0253 | 0.0000  | 0.0000  |   |
| 0.0000 | 1   | .   |                             |        |        |        |         |         |   |
| 2654   | O   | O   | . GLY GLY GLY A A 347 347 . | 0.0253 | 0.0253 | 0.0253 | 0.0000  | 0.0000  |   |
| 0.0000 | 1   | .   |                             |        |        |        |         |         |   |
| 2655   | N   | N   | . SER SER SER A A 348 348 . | 0.0305 | 0.0263 | 0.0253 | 0.0023  | 0.0005  |   |
| 0.0002 | 1   | .   |                             |        |        |        |         |         |   |
| 2656   | CA  | CA  | . SER SER SER A A 348 348 . | 0.0253 | 0.0253 | 0.0253 | 0.0000  | 0.0000  |   |
| 0.0000 | 1   | .   |                             |        |        |        |         |         |   |
| 2657   | CB  | CB  | . SER SER SER A A 348 348 . | 0.0363 | 0.0270 | 0.0261 | -0.0040 | 0.0021  | - |
| 0.0005 | 1   | .   |                             |        |        |        |         |         |   |
| 2658   | OG  | OG  | . SER SER SER A A 348 348 . | 0.0714 | 0.0679 | 0.0497 | -0.0212 | -0.0143 | - |
| 0.0162 | 1   | .   |                             |        |        |        |         |         |   |
| 2659   | C   | C   | . SER SER SER A A 348 348 . | 0.0253 | 0.0253 | 0.0253 | 0.0000  | 0.0000  |   |
| 0.0000 | 1   | .   |                             |        |        |        |         |         |   |
| 2660   | O   | O   | . SER SER SER A A 348 348 . | 0.0347 | 0.0260 | 0.0343 | -0.0020 | 0.0024  | - |
| 0.0020 | 1   | .   |                             |        |        |        |         |         |   |
| 2661   | N   | N   | . VAL VAL VAL A A 349 349 . | 0.0253 | 0.0253 | 0.0253 | 0.0000  | 0.0000  |   |
| 0.0000 | 1   | .   |                             |        |        |        |         |         |   |
| 2662   | CA  | CA  | . VAL VAL VAL A A 349 349 . | 0.0253 | 0.0253 | 0.0253 | 0.0000  | 0.0000  |   |
| 0.0000 | 1   | .   |                             |        |        |        |         |         |   |
| 2663   | CB  | CB  | . VAL VAL VAL A A 349 349 . | 0.0253 | 0.0253 | 0.0253 | 0.0000  | 0.0000  |   |
| 0.0000 | 1   | .   |                             |        |        |        |         |         |   |
| 2664   | CG1 | CG1 | . VAL VAL VAL A A 349 349 . | 0.0266 | 0.0255 | 0.0290 | -0.0005 | -0.0022 |   |
| 0.0009 | 1   | .   |                             |        |        |        |         |         |   |
| 2665   | CG2 | CG2 | . VAL VAL VAL A A 349 349 . | 0.0294 | 0.0255 | 0.0282 | 0.0009  | -0.0034 | - |
| 0.0008 | 1   | .   |                             |        |        |        |         |         |   |
| 2666   | C   | C   | . VAL VAL VAL A A 349 349 . | 0.0253 | 0.0253 | 0.0253 | 0.0000  | 0.0000  |   |
| 0.0000 | 1   | .   |                             |        |        |        |         |         |   |
| 2667   | O   | O   | . VAL VAL VAL A A 349 349 . | 0.0349 | 0.0307 | 0.0385 | 0.0018  | -0.0102 |   |
| 0.0013 | 1   | .   |                             |        |        |        |         |         |   |
| 2668   | N   | N   | . THR THR THR A A 350 350 . | 0.0408 | 0.0303 | 0.0350 | 0.0062  | -0.0079 |   |
| 0.0005 | 1   | .   |                             |        |        |        |         |         |   |
| 2669   | CA  | CA  | . THR THR THR A A 350 350 . | 0.0295 | 0.0254 | 0.0271 | -0.0005 | 0.0027  | - |
| 0.0003 | 1   | .   |                             |        |        |        |         |         |   |
| 2670   | CB  | CB  | . THR THR THR A A 350 350 . | 0.0301 | 0.0304 | 0.0328 | -0.0049 | -0.0060 |   |
| 0.0062 | 1   | .   |                             |        |        |        |         |         |   |
| 2671   | OG1 | OG1 | . THR THR THR A A 350 350 . | 0.0499 | 0.0389 | 0.0390 | -0.0118 | 0.0014  |   |
| 0.0097 | 1   | .   |                             |        |        |        |         |         |   |
| 2672   | CG2 | CG2 | . THR THR THR A A 350 350 . | 0.0606 | 0.0902 | 0.0588 | -0.0333 | 0.0019  |   |
| 0.0315 | 1   | .   |                             |        |        |        |         |         |   |
| 2673   | C   | C   | . THR THR THR A A 350 350 . | 0.0281 | 0.0253 | 0.0253 | 0.0002  | -0.0003 |   |
| 0.0000 | 1   | .   |                             |        |        |        |         |         |   |
| 2674   | O   | O   | . THR THR THR A A 350 350 . | 0.0253 | 0.0253 | 0.0253 | 0.0000  | 0.0000  |   |
| 0.0000 | 1   | .   |                             |        |        |        |         |         |   |
| 2675   | N   | N   | . GLU GLU GLU A A 351 351 . | 0.0253 | 0.0262 | 0.0285 | -0.0001 | -0.0002 |   |
| 0.0017 | 1   | .   |                             |        |        |        |         |         |   |
| 2676   | CA  | CA  | . GLU GLU GLU A A 351 351 . | 0.0382 | 0.0276 | 0.0294 | -0.0043 | -0.0054 |   |
| 0.0030 | 1   | .   |                             |        |        |        |         |         |   |
| 2677   | CB  | CB  | . GLU GLU GLU A A 351 351 . | 0.0398 | 0.0255 | 0.0299 | -0.0018 | -0.0019 | - |
| 0.0001 | 1   | .   |                             |        |        |        |         |         |   |
| 2678   | CG  | CG  | . GLU GLU GLU A A 351 351 . | 0.0384 | 0.0260 | 0.0636 | 0.0010  | -0.0145 |   |
| 0.0026 | 1   | .   |                             |        |        |        |         |         |   |
| 2679   | CD  | CD  | . GLU GLU GLU A A 351 351 . | 0.0601 | 0.0444 | 0.0467 | -0.0054 | -0.0106 | - |
| 0.0058 | 1   | .   |                             |        |        |        |         |         |   |
| 2680   | OE1 | OE1 | . GLU GLU GLU A A 351 351 . | 0.0593 | 0.0410 | 0.0440 | -0.0019 | -0.0148 | - |
| 0.0032 | 1   | .   |                             |        |        |        |         |         |   |
| 2681   | OE2 | OE2 | . GLU GLU GLU A A 351 351 . | 0.0896 | 0.0773 | 0.1065 | 0.0043  | -0.0029 |   |
| 0.0024 | 1   | .   |                             |        |        |        |         |         |   |
| 2682   | C   | C   | . GLU GLU GLU A A 351 351 . | 0.0253 | 0.0253 | 0.0253 | 0.0000  | 0.0000  |   |
| 0.0000 | 1   | .   |                             |        |        |        |         |         |   |

|        |     |     |                   |         |                                          |
|--------|-----|-----|-------------------|---------|------------------------------------------|
| 2683   | O   | O   | . GLU GLU GLU A A | 351 351 | . 0.0469 0.0349 0.0438 -0.0034 0.0024    |
| 0.0058 | 1   | .   |                   |         |                                          |
| 2684   | N   | N   | . ALA ALA ALA A A | 352 352 | . 0.0253 0.0253 0.0253 0.0000 0.0000     |
| 0.0000 | 1   | .   |                   |         |                                          |
| 2685   | CA  | CA  | . ALA ALA ALA A A | 352 352 | . 0.0253 0.0253 0.0253 0.0000 0.0000     |
| 0.0000 | 1   | .   |                   |         |                                          |
| 2686   | CB  | CB  | . ALA ALA ALA A A | 352 352 | . 0.0268 0.0311 0.0288 0.0002 0.0003 -   |
| 0.0043 | 1   | .   |                   |         |                                          |
| 2687   | C   | C   | . ALA ALA ALA A A | 352 352 | . 0.0253 0.0253 0.0253 0.0000 0.0000     |
| 0.0000 | 1   | .   |                   |         |                                          |
| 2688   | O   | O   | . ALA ALA ALA A A | 352 352 | . 0.0341 0.0376 0.0325 -0.0104 0.0080 -  |
| 0.0094 | 1   | .   |                   |         |                                          |
| 2689   | N   | N   | . ILE ILE ILE A A | 353 353 | . 0.0253 0.0253 0.0253 0.0000 0.0000     |
| 0.0000 | 1   | .   |                   |         |                                          |
| 2690   | CA  | CA  | . ILE ILE ILE A A | 353 353 | . 0.0284 0.0301 0.0253 0.0038 0.0003     |
| 0.0004 | 1   | .   |                   |         |                                          |
| 2691   | CB  | CB  | . ILE ILE ILE A A | 353 353 | . 0.0253 0.0253 0.0253 0.0000 0.0000     |
| 0.0000 | 1   | .   |                   |         |                                          |
| 2692   | CG1 | CG1 | . ILE ILE ILE A A | 353 353 | . 0.0813 0.0395 0.0662 0.0120 0.0110 -   |
| 0.0120 | 1   | .   |                   |         |                                          |
| 2693   | CD1 | CD1 | . ILE ILE ILE A A | 353 353 | . 0.1880 0.1620 0.1733 -0.0472 0.0265    |
| 0.0350 | 1   | .   |                   |         |                                          |
| 2694   | CG2 | CG2 | . ILE ILE ILE A A | 353 353 | . 0.0493 0.0518 0.0641 0.0211 0.0052     |
| 0.0154 | 1   | .   |                   |         |                                          |
| 2695   | C   | C   | . ILE ILE ILE A A | 353 353 | . 0.0253 0.0253 0.0253 0.0000 0.0000     |
| 0.0000 | 1   | .   |                   |         |                                          |
| 2696   | O   | O   | . ILE ILE ILE A A | 353 353 | . 0.0565 0.0318 0.0291 -0.0051 0.0047 -  |
| 0.0049 | 1   | .   |                   |         |                                          |
| 2697   | N   | N   | . GLN GLN GLN A A | 354 354 | . 0.0339 0.0254 0.0255 -0.0008 0.0014 -  |
| 0.0001 | 1   | .   |                   |         |                                          |
| 2698   | CA  | CA  | . GLN GLN GLN A A | 354 354 | . 0.0583 0.0518 0.0484 0.0008 -0.0094 -  |
| 0.0042 | 1   | .   |                   |         |                                          |
| 2699   | CB  | CB  | . GLN GLN GLN A A | 354 354 | . 0.0779 0.0518 0.0660 -0.0035 0.0012    |
| 0.0060 | 1   | .   |                   |         |                                          |
| 2700   | CG  | CG  | . GLN GLN GLN A A | 354 354 | . 0.1085 0.1434 0.1676 -0.0111 -0.0179 - |
| 0.0171 | 1   | .   |                   |         |                                          |
| 2701   | CD  | CD  | . GLN GLN GLN A A | 354 354 | . 0.2275 0.1934 0.2532 -0.0049 -0.0107 - |
| 0.0027 | 1   | .   |                   |         |                                          |
| 2702   | OE1 | OE1 | . GLN GLN GLN A A | 354 354 | . 0.3316 0.2471 0.2863 -0.0301 -0.0052   |
| 0.0023 | 1   | .   |                   |         |                                          |
| 2703   | NE2 | NE2 | . GLN GLN GLN A A | 354 354 | . 0.2932 0.1875 0.3020 0.0119 0.0401 -   |
| 0.0257 | 1   | .   |                   |         |                                          |
| 2704   | C   | C   | . GLN GLN GLN A A | 354 354 | . 0.0533 0.0541 0.0457 -0.0047 0.0045 -  |
| 0.0010 | 1   | .   |                   |         |                                          |
| 2705   | O   | O   | . GLN GLN GLN A A | 354 354 | . 0.0786 0.0484 0.0527 0.0134 -0.0103 -  |
| 0.0113 | 1   | .   |                   |         |                                          |
| 2706   | N   | N   | . ALA ALA ALA A A | 355 355 | . 0.0591 0.0309 0.0277 -0.0136 -0.0058   |
| 0.0026 | 1   | .   |                   |         |                                          |
| 2707   | CA  | CA  | . ALA ALA ALA A A | 355 355 | . 0.0264 0.0394 0.0257 0.0040 0.0006     |
| 0.0024 | 1   | .   |                   |         |                                          |
| 2708   | CB  | CB  | . ALA ALA ALA A A | 355 355 | . 0.0253 0.0253 0.0253 0.0000 0.0000     |
| 0.0000 | 1   | .   |                   |         |                                          |
| 2709   | C   | C   | . ALA ALA ALA A A | 355 355 | . 0.0253 0.0253 0.0253 0.0000 0.0000     |
| 0.0000 | 1   | .   |                   |         |                                          |
| 2710   | O   | O   | . ALA ALA ALA A A | 355 355 | . 0.0390 0.0323 0.0308 -0.0022 -0.0053   |
| 0.0056 | 1   | .   |                   |         |                                          |
| 2711   | N   | N   | . CYS CYS CYS A A | 356 356 | . 0.0346 0.0258 0.0253 -0.0021 0.0003    |
| 0.0000 | 1   | .   |                   |         |                                          |
| 2712   | CA  | CA  | . CYS CYS CYS A A | 356 356 | . 0.0253 0.0253 0.0253 0.0000 0.0000     |
| 0.0000 | 1   | .   |                   |         |                                          |















|        |     |     |   |     |     |     |   |   |     |     |   |        |        |        |         |         |
|--------|-----|-----|---|-----|-----|-----|---|---|-----|-----|---|--------|--------|--------|---------|---------|
| 2893   | CE2 | CE2 | . | PHE | PHE | PHE | A | A | 379 | 379 | . | 0.0383 | 0.0338 | 0.0353 | 0.0042  | 0.0007  |
| 0.0086 | 1   | .   |   |     |     |     |   |   |     |     |   |        |        |        |         |         |
| 2894   | CD2 | CD2 | . | PHE | PHE | PHE | A | A | 379 | 379 | . | 0.0253 | 0.0253 | 0.0253 | 0.0000  | 0.0000  |
| 0.0000 | 1   | .   |   |     |     |     |   |   |     |     |   |        |        |        |         |         |
| 2895   | C   | C   | . | PHE | PHE | PHE | A | A | 379 | 379 | . | 0.0253 | 0.0253 | 0.0253 | 0.0000  | 0.0000  |
| 0.0000 | 1   | .   |   |     |     |     |   |   |     |     |   |        |        |        |         |         |
| 2896   | O   | O   | . | PHE | PHE | PHE | A | A | 379 | 379 | . | 0.0253 | 0.0253 | 0.0253 | 0.0000  | 0.0000  |
| 0.0000 | 1   | .   |   |     |     |     |   |   |     |     |   |        |        |        |         |         |
| 2897   | N   | N   | . | ILE | ILE | ILE | A | A | 380 | 380 | . | 0.0253 | 0.0253 | 0.0253 | 0.0000  | 0.0000  |
| 0.0000 | 1   | .   |   |     |     |     |   |   |     |     |   |        |        |        |         |         |
| 2898   | CA  | CA  | . | ILE | ILE | ILE | A | A | 380 | 380 | . | 0.0253 | 0.0253 | 0.0253 | 0.0000  | 0.0000  |
| 0.0000 | 1   | .   |   |     |     |     |   |   |     |     |   |        |        |        |         |         |
| 2899   | CB  | CB  | . | ILE | ILE | ILE | A | A | 380 | 380 | . | 0.0253 | 0.0253 | 0.0253 | 0.0000  | 0.0000  |
| 0.0000 | 1   | .   |   |     |     |     |   |   |     |     |   |        |        |        |         |         |
| 2900   | CG1 | CG1 | . | ILE | ILE | ILE | A | A | 380 | 380 | . | 0.0253 | 0.0253 | 0.0253 | 0.0000  | 0.0000  |
| 0.0000 | 1   | .   |   |     |     |     |   |   |     |     |   |        |        |        |         |         |
| 2901   | CD1 | CD1 | . | ILE | ILE | ILE | A | A | 380 | 380 | . | 0.0253 | 0.0253 | 0.0253 | 0.0000  | 0.0000  |
| 0.0000 | 1   | .   |   |     |     |     |   |   |     |     |   |        |        |        |         |         |
| 2902   | CG2 | CG2 | . | ILE | ILE | ILE | A | A | 380 | 380 | . | 0.0257 | 0.0258 | 0.0259 | 0.0004  | 0.0005  |
| 0.0005 | 1   | .   |   |     |     |     |   |   |     |     |   |        |        |        |         |         |
| 2903   | C   | C   | . | ILE | ILE | ILE | A | A | 380 | 380 | . | 0.0253 | 0.0253 | 0.0253 | 0.0000  | 0.0000  |
| 0.0000 | 1   | .   |   |     |     |     |   |   |     |     |   |        |        |        |         |         |
| 2904   | O   | O   | . | ILE | ILE | ILE | A | A | 380 | 380 | . | 0.0253 | 0.0253 | 0.0253 | 0.0000  | 0.0000  |
| 0.0000 | 1   | .   |   |     |     |     |   |   |     |     |   |        |        |        |         |         |
| 2905   | N   | N   | . | ALA | ALA | ALA | A | A | 381 | 381 | . | 0.0253 | 0.0253 | 0.0253 | 0.0000  | 0.0000  |
| 0.0000 | 1   | .   |   |     |     |     |   |   |     |     |   |        |        |        |         |         |
| 2906   | CA  | CA  | . | ALA | ALA | ALA | A | A | 381 | 381 | . | 0.0253 | 0.0253 | 0.0253 | 0.0000  | 0.0000  |
| 0.0000 | 1   | .   |   |     |     |     |   |   |     |     |   |        |        |        |         |         |
| 2907   | CB  | CB  | . | ALA | ALA | ALA | A | A | 381 | 381 | . | 0.0253 | 0.0253 | 0.0253 | 0.0000  | 0.0000  |
| 0.0000 | 1   | .   |   |     |     |     |   |   |     |     |   |        |        |        |         |         |
| 2908   | C   | C   | . | ALA | ALA | ALA | A | A | 381 | 381 | . | 0.0253 | 0.0253 | 0.0253 | 0.0000  | 0.0000  |
| 0.0000 | 1   | .   |   |     |     |     |   |   |     |     |   |        |        |        |         |         |
| 2909   | O   | O   | . | ALA | ALA | ALA | A | A | 381 | 381 | . | 0.0253 | 0.0253 | 0.0253 | 0.0000  | 0.0000  |
| 0.0000 | 1   | .   |   |     |     |     |   |   |     |     |   |        |        |        |         |         |
| 2910   | N   | N   | . | ASP | ASP | ASP | A | A | 382 | 382 | . | 0.0253 | 0.0253 | 0.0253 | 0.0000  | 0.0000  |
| 0.0000 | 1   | .   |   |     |     |     |   |   |     |     |   |        |        |        |         |         |
| 2911   | CA  | CA  | . | ASP | ASP | ASP | A | A | 382 | 382 | . | 0.0253 | 0.0253 | 0.0253 | 0.0000  | 0.0000  |
| 0.0000 | 1   | .   |   |     |     |     |   |   |     |     |   |        |        |        |         |         |
| 2912   | CB  | CB  | . | ASP | ASP | ASP | A | A | 382 | 382 | . | 0.0309 | 0.0253 | 0.0267 | 0.0000  | -0.0027 |
| 0.0000 | 1   | .   |   |     |     |     |   |   |     |     |   |        |        |        |         |         |
| 2913   | CG  | CG  | . | ASP | ASP | ASP | A | A | 382 | 382 | . | 0.0260 | 0.0341 | 0.0314 | 0.0020  | -0.0003 |
| 0.0035 | 1   | .   |   |     |     |     |   |   |     |     |   |        |        |        |         |         |
| 2914   | OD1 | OD1 | . | ASP | ASP | ASP | A | A | 382 | 382 | . | 0.0673 | 0.0622 | 0.0755 | -0.0227 | 0.0072  |
| 0.0109 | 1   | .   |   |     |     |     |   |   |     |     |   |        |        |        |         |         |
| 2915   | OD2 | OD2 | . | ASP | ASP | ASP | A | A | 382 | 382 | . | 0.0676 | 0.0524 | 0.0749 | -0.0073 | 0.0090  |
| 0.0165 | 1   | .   |   |     |     |     |   |   |     |     |   |        |        |        |         |         |
| 2916   | C   | C   | . | ASP | ASP | ASP | A | A | 382 | 382 | . | 0.0253 | 0.0253 | 0.0253 | 0.0000  | 0.0000  |
| 0.0000 | 1   | .   |   |     |     |     |   |   |     |     |   |        |        |        |         |         |
| 2917   | O   | O   | . | ASP | ASP | ASP | A | A | 382 | 382 | . | 0.0253 | 0.0253 | 0.0253 | 0.0000  | 0.0000  |
| 0.0000 | 1   | .   |   |     |     |     |   |   |     |     |   |        |        |        |         |         |
| 2918   | N   | N   | . | LEU | LEU | LEU | A | A | 383 | 383 | . | 0.0253 | 0.0253 | 0.0253 | 0.0000  | 0.0000  |
| 0.0000 | 1   | .   |   |     |     |     |   |   |     |     |   |        |        |        |         |         |
| 2919   | CA  | CA  | . | LEU | LEU | LEU | A | A | 383 | 383 | . | 0.0253 | 0.0253 | 0.0253 | 0.0000  | 0.0000  |
| 0.0000 | 1   | .   |   |     |     |     |   |   |     |     |   |        |        |        |         |         |
| 2920   | CB  | CB  | . | LEU | LEU | LEU | A | A | 383 | 383 | . | 0.0253 | 0.0253 | 0.0253 | 0.0000  | 0.0000  |
| 0.0000 | 1   | .   |   |     |     |     |   |   |     |     |   |        |        |        |         |         |
| 2921   | CG  | CG  | . | LEU | LEU | LEU | A | A | 383 | 383 | . | 0.0253 | 0.0253 | 0.0253 | 0.0000  | 0.0000  |
| 0.0000 | 1   | .   |   |     |     |     |   |   |     |     |   |        |        |        |         |         |
| 2922   | CD1 | CD1 | . | LEU | LEU | LEU | A | A | 383 | 383 | . | 0.0276 | 0.0259 | 0.0260 | -0.0012 | 0.0013  |
| 0.0007 | 1   | .   |   |     |     |     |   |   |     |     |   |        |        |        |         |         |

|        |     |     |                             |        |        |        |         |         |   |
|--------|-----|-----|-----------------------------|--------|--------|--------|---------|---------|---|
| 2923   | CD2 | CD2 | . LEU LEU LEU A A 383 383 . | 0.0253 | 0.0253 | 0.0253 | 0.0000  | 0.0000  |   |
| 0.0000 | 1   | .   |                             |        |        |        |         |         |   |
| 2924   | C   | C   | . LEU LEU LEU A A 383 383 . | 0.0253 | 0.0253 | 0.0253 | 0.0000  | 0.0000  |   |
| 0.0000 | 1   | .   |                             |        |        |        |         |         |   |
| 2925   | O   | O   | . LEU LEU LEU A A 383 383 . | 0.0253 | 0.0253 | 0.0253 | 0.0000  | 0.0000  |   |
| 0.0000 | 1   | .   |                             |        |        |        |         |         |   |
| 2926   | N   | N   | . VAL VAL VAL A A 384 384 . | 0.0253 | 0.0253 | 0.0253 | 0.0000  | 0.0000  |   |
| 0.0000 | 1   | .   |                             |        |        |        |         |         |   |
| 2927   | CA  | CA  | . VAL VAL VAL A A 384 384 . | 0.0253 | 0.0253 | 0.0253 | 0.0000  | 0.0000  |   |
| 0.0000 | 1   | .   |                             |        |        |        |         |         |   |
| 2928   | CB  | CB  | . VAL VAL VAL A A 384 384 . | 0.0253 | 0.0253 | 0.0253 | 0.0000  | 0.0000  |   |
| 0.0000 | 1   | .   |                             |        |        |        |         |         |   |
| 2929   | CG1 | CG1 | . VAL VAL VAL A A 384 384 . | 0.0253 | 0.0253 | 0.0253 | 0.0000  | 0.0000  |   |
| 0.0000 | 1   | .   |                             |        |        |        |         |         |   |
| 2930   | CG2 | CG2 | . VAL VAL VAL A A 384 384 . | 0.0253 | 0.0253 | 0.0253 | 0.0000  | 0.0000  |   |
| 0.0000 | 1   | .   |                             |        |        |        |         |         |   |
| 2931   | C   | C   | . VAL VAL VAL A A 384 384 . | 0.0253 | 0.0253 | 0.0253 | 0.0000  | 0.0000  |   |
| 0.0000 | 1   | .   |                             |        |        |        |         |         |   |
| 2932   | O   | O   | . VAL VAL VAL A A 384 384 . | 0.0253 | 0.0253 | 0.0253 | 0.0000  | 0.0000  |   |
| 0.0000 | 1   | .   |                             |        |        |        |         |         |   |
| 2933   | N   | N   | . VAL VAL VAL A A 385 385 . | 0.0253 | 0.0253 | 0.0253 | 0.0000  | 0.0000  |   |
| 0.0000 | 1   | .   |                             |        |        |        |         |         |   |
| 2934   | CA  | CA  | . VAL VAL VAL A A 385 385 . | 0.0253 | 0.0280 | 0.0263 | 0.0000  | 0.0000  |   |
| 0.0016 | 1   | .   |                             |        |        |        |         |         |   |
| 2935   | CB  | CB  | . VAL VAL VAL A A 385 385 . | 0.0253 | 0.0253 | 0.0253 | 0.0000  | 0.0000  |   |
| 0.0000 | 1   | .   |                             |        |        |        |         |         |   |
| 2936   | CG1 | CG1 | . VAL VAL VAL A A 385 385 . | 0.0255 | 0.0329 | 0.0270 | 0.0013  | -0.0006 | - |
| 0.0036 | 1   | .   |                             |        |        |        |         |         |   |
| 2937   | CG2 | CG2 | . VAL VAL VAL A A 385 385 . | 0.0253 | 0.0253 | 0.0253 | 0.0000  | 0.0000  |   |
| 0.0000 | 1   | .   |                             |        |        |        |         |         |   |
| 2938   | C   | C   | . VAL VAL VAL A A 385 385 . | 0.0253 | 0.0253 | 0.0253 | 0.0000  | 0.0000  |   |
| 0.0000 | 1   | .   |                             |        |        |        |         |         |   |
| 2939   | O   | O   | . VAL VAL VAL A A 385 385 . | 0.0253 | 0.0253 | 0.0253 | 0.0000  | 0.0000  |   |
| 0.0000 | 1   | .   |                             |        |        |        |         |         |   |
| 2940   | N   | N   | . GLY GLY GLY A A 386 386 . | 0.0253 | 0.0253 | 0.0253 | 0.0000  | 0.0000  |   |
| 0.0000 | 1   | .   |                             |        |        |        |         |         |   |
| 2941   | CA  | CA  | . GLY GLY GLY A A 386 386 . | 0.0253 | 0.0253 | 0.0253 | 0.0000  | 0.0000  |   |
| 0.0000 | 1   | .   |                             |        |        |        |         |         |   |
| 2942   | C   | C   | . GLY GLY GLY A A 386 386 . | 0.0261 | 0.0253 | 0.0263 | 0.0001  | 0.0009  |   |
| 0.0001 | 1   | .   |                             |        |        |        |         |         |   |
| 2943   | O   | O   | . GLY GLY GLY A A 386 386 . | 0.0551 | 0.0602 | 0.0391 | 0.0003  | 0.0087  |   |
| 0.0198 | 1   | .   |                             |        |        |        |         |         |   |
| 2944   | N   | N   | . LEU LEU LEU A A 387 387 . | 0.0253 | 0.0253 | 0.0253 | 0.0000  | 0.0000  |   |
| 0.0000 | 1   | .   |                             |        |        |        |         |         |   |
| 2945   | CA  | CA  | . LEU LEU LEU A A 387 387 . | 0.0253 | 0.0253 | 0.0253 | 0.0000  | 0.0000  |   |
| 0.0000 | 1   | .   |                             |        |        |        |         |         |   |
| 2946   | CB  | CB  | . LEU LEU LEU A A 387 387 . | 0.0253 | 0.0253 | 0.0253 | 0.0000  | 0.0000  |   |
| 0.0000 | 1   | .   |                             |        |        |        |         |         |   |
| 2947   | CG  | CG  | . LEU LEU LEU A A 387 387 . | 0.0281 | 0.0256 | 0.0253 | -0.0009 | 0.0001  |   |
| 0.0000 | 1   | .   |                             |        |        |        |         |         |   |
| 2948   | CD1 | CD1 | . LEU LEU LEU A A 387 387 . | 0.0549 | 0.0649 | 0.0456 | 0.0275  | -0.0004 | - |
| 0.0173 | 1   | .   |                             |        |        |        |         |         |   |
| 2949   | CD2 | CD2 | . LEU LEU LEU A A 387 387 . | 0.0624 | 0.0336 | 0.0603 | -0.0159 | 0.0014  | - |
| 0.0077 | 1   | .   |                             |        |        |        |         |         |   |
| 2950   | C   | C   | . LEU LEU LEU A A 387 387 . | 0.0269 | 0.0259 | 0.0300 | -0.0009 | 0.0027  | - |
| 0.0016 | 1   | .   |                             |        |        |        |         |         |   |
| 2951   | O   | O   | . LEU LEU LEU A A 387 387 . | 0.0254 | 0.0253 | 0.0254 | 0.0000  | -0.0001 |   |
| 0.0000 | 1   | .   |                             |        |        |        |         |         |   |
| 2952   | N   | N   | . CYS CYS CYS A A 388 388 . | 0.0254 | 0.0282 | 0.0290 | -0.0005 | -0.0005 |   |
| 0.0032 | 1   | .   |                             |        |        |        |         |         |   |



















|        |     |     |                             |        |        |        |         |         |   |
|--------|-----|-----|-----------------------------|--------|--------|--------|---------|---------|---|
| 3193   | O   | O   | . ASP ASP ASP A A 418 418 . | 0.3963 | 0.4059 | 0.3930 | 0.0008  | -0.0103 | - |
| 0.0114 | 1   | .   |                             |        |        |        |         |         |   |
| 3194   | N   | N   | . GLU GLU GLU A A 419 419 . | 0.3466 | 0.3648 | 0.3606 | -0.0013 | 0.0020  | - |
| 0.0005 | 1   | .   |                             |        |        |        |         |         |   |
| 3195   | CA  | CA  | . GLU GLU GLU A A 419 419 . | 0.3343 | 0.3448 | 0.3431 | 0.0018  | 0.0057  |   |
| 0.0006 | 1   | .   |                             |        |        |        |         |         |   |
| 3196   | CB  | CB  | . GLU GLU GLU A A 419 419 . | 0.3483 | 0.3636 | 0.3568 | -0.0019 | -0.0035 |   |
| 0.0035 | 1   | .   |                             |        |        |        |         |         |   |
| 3197   | CG  | CG  | . GLU GLU GLU A A 419 419 . | 0.4216 | 0.4374 | 0.4200 | 0.0126  | 0.0081  | - |
| 0.0067 | 1   | .   |                             |        |        |        |         |         |   |
| 3198   | CD  | CD  | . GLU GLU GLU A A 419 419 . | 0.5204 | 0.4919 | 0.5267 | -0.0140 | -0.0001 |   |
| 0.0003 | 1   | .   |                             |        |        |        |         |         |   |
| 3199   | OE1 | OE1 | . GLU GLU GLU A A 419 419 . | 0.5517 | 0.5355 | 0.5401 | 0.0245  | -0.0064 |   |
| 0.0065 | 1   | .   |                             |        |        |        |         |         |   |
| 3200   | OE2 | OE2 | . GLU GLU GLU A A 419 419 . | 0.5451 | 0.5359 | 0.5837 | 0.0198  | 0.0081  |   |
| 0.0116 | 1   | .   |                             |        |        |        |         |         |   |
| 3201   | C   | C   | . GLU GLU GLU A A 419 419 . | 0.3036 | 0.3067 | 0.3054 | -0.0042 | 0.0040  |   |
| 0.0025 | 1   | .   |                             |        |        |        |         |         |   |
| 3202   | O   | O   | . GLU GLU GLU A A 419 419 . | 0.2891 | 0.3098 | 0.2928 | 0.0077  | 0.0059  | - |
| 0.0016 | 1   | .   |                             |        |        |        |         |         |   |
| 3203   | N   | N   | . ALA ALA ALA A A 420 420 . | 0.2710 | 0.2771 | 0.2805 | -0.0041 | 0.0049  | - |
| 0.0092 | 1   | .   |                             |        |        |        |         |         |   |
| 3204   | CA  | CA  | . ALA ALA ALA A A 420 420 . | 0.2450 | 0.2422 | 0.2419 | -0.0085 | 0.0013  | - |
| 0.0005 | 1   | .   |                             |        |        |        |         |         |   |
| 3205   | CB  | CB  | . ALA ALA ALA A A 420 420 . | 0.2049 | 0.2001 | 0.2211 | -0.0319 | 0.0124  | - |
| 0.0045 | 1   | .   |                             |        |        |        |         |         |   |
| 3206   | C   | C   | . ALA ALA ALA A A 420 420 . | 0.2346 | 0.2407 | 0.2424 | -0.0031 | -0.0026 |   |
| 0.0027 | 1   | .   |                             |        |        |        |         |         |   |
| 3207   | O   | O   | . ALA ALA ALA A A 420 420 . | 0.2584 | 0.2661 | 0.2772 | -0.0111 | -0.0096 | - |
| 0.0012 | 1   | .   |                             |        |        |        |         |         |   |
| 3208   | N   | N   | . ARG ARG ARG A A 421 421 . | 0.2231 | 0.2213 | 0.2321 | -0.0133 | 0.0039  | - |
| 0.0059 | 1   | .   |                             |        |        |        |         |         |   |
| 3209   | CA  | CA  | . ARG ARG ARG A A 421 421 . | 0.1646 | 0.1872 | 0.1773 | 0.0001  | 0.0067  |   |
| 0.0019 | 1   | .   |                             |        |        |        |         |         |   |
| 3210   | CB  | CB  | . ARG ARG ARG A A 421 421 . | 0.1849 | 0.1728 | 0.2009 | 0.0050  | 0.0229  |   |
| 0.0035 | 1   | .   |                             |        |        |        |         |         |   |
| 3211   | CG  | CG  | . ARG ARG ARG A A 421 421 . | 0.2663 | 0.2331 | 0.2241 | -0.0060 | -0.0047 | - |
| 0.0046 | 1   | .   |                             |        |        |        |         |         |   |
| 3212   | CD  | CD  | . ARG ARG ARG A A 421 421 . | 0.3000 | 0.2862 | 0.3252 | 0.0214  | 0.0092  |   |
| 0.0217 | 1   | .   |                             |        |        |        |         |         |   |
| 3213   | NE  | NE  | . ARG ARG ARG A A 421 421 . | 0.3812 | 0.4009 | 0.3850 | -0.0010 | 0.0020  | - |
| 0.0103 | 1   | .   |                             |        |        |        |         |         |   |
| 3214   | CZ  | CZ  | . ARG ARG ARG A A 421 421 . | 0.4145 | 0.4073 | 0.4392 | 0.0286  | 0.0026  |   |
| 0.0002 | 1   | .   |                             |        |        |        |         |         |   |
| 3215   | NH1 | NH1 | . ARG ARG ARG A A 421 421 . | 0.4426 | 0.4449 | 0.4305 | 0.0273  | 0.0068  | - |
| 0.0058 | 1   | .   |                             |        |        |        |         |         |   |
| 3216   | NH2 | NH2 | . ARG ARG ARG A A 421 421 . | 0.4439 | 0.3967 | 0.4389 | 0.0134  | 0.0047  |   |
| 0.0135 | 1   | .   |                             |        |        |        |         |         |   |
| 3217   | C   | C   | . ARG ARG ARG A A 421 421 . | 0.1208 | 0.1259 | 0.1285 | -0.0093 | 0.0077  | - |
| 0.0015 | 1   | .   |                             |        |        |        |         |         |   |
| 3218   | O   | O   | . ARG ARG ARG A A 421 421 . | 0.1430 | 0.1542 | 0.1753 | -0.0229 | 0.0349  | - |
| 0.0125 | 1   | .   |                             |        |        |        |         |         |   |
| 3219   | N   | N   | . PHE PHE PHE A A 422 422 . | 0.0409 | 0.0445 | 0.0406 | 0.0043  | 0.0025  |   |
| 0.0082 | 1   | .   |                             |        |        |        |         |         |   |
| 3220   | CA  | CA  | . PHE PHE PHE A A 422 422 . | 0.0255 | 0.0258 | 0.0257 | 0.0003  | 0.0002  |   |
| 0.0004 | 1   | .   |                             |        |        |        |         |         |   |
| 3221   | CB  | CB  | . PHE PHE PHE A A 422 422 . | 0.0279 | 0.0333 | 0.0402 | 0.0013  | 0.0058  | - |
| 0.0009 | 1   | .   |                             |        |        |        |         |         |   |
| 3222   | CG  | CG  | . PHE PHE PHE A A 422 422 . | 0.0253 | 0.0253 | 0.0253 | 0.0000  | 0.0000  |   |
| 0.0000 | 1   | .   |                             |        |        |        |         |         |   |



|        |     |     |                             |        |        |        |         |         |   |
|--------|-----|-----|-----------------------------|--------|--------|--------|---------|---------|---|
| 3253   | OD1 | OD1 | . ASN ASN ASN A A 426 426 . | 0.1234 | 0.0996 | 0.0945 | 0.0128  | -0.0140 |   |
| 0.0122 | 1   | .   |                             |        |        |        |         |         |   |
| 3254   | ND2 | ND2 | . ASN ASN ASN A A 426 426 . | 0.0253 | 0.0253 | 0.0253 | 0.0000  | 0.0000  |   |
| 0.0000 | 1   | .   |                             |        |        |        |         |         |   |
| 3255   | C   | C   | . ASN ASN ASN A A 426 426 . | 0.0253 | 0.0253 | 0.0253 | 0.0000  | 0.0000  |   |
| 0.0000 | 1   | .   |                             |        |        |        |         |         |   |
| 3256   | O   | O   | . ASN ASN ASN A A 426 426 . | 0.0484 | 0.0355 | 0.0362 | -0.0084 | 0.0007  | - |
| 0.0091 | 1   | .   |                             |        |        |        |         |         |   |
| 3257   | N   | N   | . PHE PHE PHE A A 427 427 . | 0.0277 | 0.0263 | 0.0262 | -0.0015 | 0.0014  | - |
| 0.0009 | 1   | .   |                             |        |        |        |         |         |   |
| 3258   | CA  | CA  | . PHE PHE PHE A A 427 427 . | 0.0510 | 0.0446 | 0.0408 | 0.0004  | 0.0006  |   |
| 0.0008 | 1   | .   |                             |        |        |        |         |         |   |
| 3259   | CB  | CB  | . PHE PHE PHE A A 427 427 . | 0.0562 | 0.0393 | 0.0268 | -0.0120 | 0.0062  | - |
| 0.0008 | 1   | .   |                             |        |        |        |         |         |   |
| 3260   | CG  | CG  | . PHE PHE PHE A A 427 427 . | 0.0626 | 0.0565 | 0.0661 | 0.0074  | -0.0017 |   |
| 0.0042 | 1   | .   |                             |        |        |        |         |         |   |
| 3261   | CD1 | CD1 | . PHE PHE PHE A A 427 427 . | 0.0745 | 0.0617 | 0.0562 | 0.0030  | -0.0186 |   |
| 0.0092 | 1   | .   |                             |        |        |        |         |         |   |
| 3262   | CE1 | CE1 | . PHE PHE PHE A A 427 427 . | 0.0685 | 0.0602 | 0.0583 | -0.0074 | -0.0148 |   |
| 0.0143 | 1   | .   |                             |        |        |        |         |         |   |
| 3263   | CZ  | CZ  | . PHE PHE PHE A A 427 427 . | 0.0927 | 0.1102 | 0.0872 | -0.0007 | -0.0075 |   |
| 0.0002 | 1   | .   |                             |        |        |        |         |         |   |
| 3264   | CE2 | CE2 | . PHE PHE PHE A A 427 427 . | 0.0581 | 0.0488 | 0.0729 | -0.0004 | 0.0133  | - |
| 0.0166 | 1   | .   |                             |        |        |        |         |         |   |
| 3265   | CD2 | CD2 | . PHE PHE PHE A A 427 427 . | 0.1010 | 0.1182 | 0.1355 | 0.0035  | -0.0033 | - |
| 0.0155 | 1   | .   |                             |        |        |        |         |         |   |
| 3266   | C   | C   | . PHE PHE PHE A A 427 427 . | 0.0300 | 0.0275 | 0.0294 | -0.0010 | 0.0029  | - |
| 0.0028 | 1   | .   |                             |        |        |        |         |         |   |
| 3267   | O   | O   | . PHE PHE PHE A A 427 427 . | 0.0518 | 0.0340 | 0.0380 | -0.0152 | 0.0051  | - |
| 0.0034 | 1   | .   |                             |        |        |        |         |         |   |
| 3268   | N   | N   | . ARG ARG ARG A A 428 428 . | 0.0284 | 0.0338 | 0.0416 | 0.0003  | -0.0032 | - |
| 0.0108 | 1   | .   |                             |        |        |        |         |         |   |
| 3269   | CA  | CA  | . ARG ARG ARG A A 428 428 . | 0.0741 | 0.0600 | 0.0551 | -0.0028 | -0.0098 | - |
| 0.0017 | 1   | .   |                             |        |        |        |         |         |   |
| 3270   | CB  | CB  | . ARG ARG ARG A A 428 428 . | 0.0488 | 0.0568 | 0.0730 | 0.0030  | -0.0082 |   |
| 0.0039 | 1   | .   |                             |        |        |        |         |         |   |
| 3271   | CG  | CG  | . ARG ARG ARG A A 428 428 . | 0.0933 | 0.1016 | 0.0867 | -0.0278 | 0.0069  | - |
| 0.0052 | 1   | .   |                             |        |        |        |         |         |   |
| 3272   | CD  | CD  | . ARG ARG ARG A A 428 428 . | 0.1495 | 0.2048 | 0.1186 | -0.0033 | -0.0187 |   |
| 0.0101 | 1   | .   |                             |        |        |        |         |         |   |
| 3273   | NE  | NE  | . ARG ARG ARG A A 428 428 . | 0.2053 | 0.1440 | 0.1561 | 0.0292  | -0.0143 | - |
| 0.0115 | 1   | .   |                             |        |        |        |         |         |   |
| 3274   | CZ  | CZ  | . ARG ARG ARG A A 428 428 . | 0.2035 | 0.2062 | 0.2346 | 0.0042  | -0.0204 | - |
| 0.0077 | 1   | .   |                             |        |        |        |         |         |   |
| 3275   | NH1 | NH1 | . ARG ARG ARG A A 428 428 . | 0.1572 | 0.1758 | 0.1714 | 0.0013  | -0.0066 | - |
| 0.0287 | 1   | .   |                             |        |        |        |         |         |   |
| 3276   | NH2 | NH2 | . ARG ARG ARG A A 428 428 . | 0.2192 | 0.2184 | 0.1955 | 0.0101  | -0.0505 |   |
| 0.0227 | 1   | .   |                             |        |        |        |         |         |   |
| 3277   | C   | C   | . ARG ARG ARG A A 428 428 . | 0.0972 | 0.0913 | 0.0993 | -0.0014 | -0.0052 | - |
| 0.0033 | 1   | .   |                             |        |        |        |         |         |   |
| 3278   | O   | O   | . ARG ARG ARG A A 428 428 . | 0.1742 | 0.1298 | 0.1392 | 0.0137  | 0.0067  | - |
| 0.0039 | 1   | .   |                             |        |        |        |         |         |   |
| 3279   | N   | N   | . ASN ASN ASN A A 429 429 . | 0.1135 | 0.1223 | 0.1042 | -0.0040 | -0.0115 |   |
| 0.0076 | 1   | .   |                             |        |        |        |         |         |   |
| 3280   | CA  | CA  | . ASN ASN ASN A A 429 429 . | 0.1303 | 0.1461 | 0.1129 | -0.0075 | -0.0010 |   |
| 0.0074 | 1   | .   |                             |        |        |        |         |         |   |
| 3281   | CB  | CB  | . ASN ASN ASN A A 429 429 . | 0.1729 | 0.1939 | 0.1528 | 0.0002  | -0.0232 |   |
| 0.0306 | 1   | .   |                             |        |        |        |         |         |   |
| 3282   | CG  | CG  | . ASN ASN ASN A A 429 429 . | 0.2669 | 0.2862 | 0.2357 | 0.0013  | -0.0124 | - |
| 0.0172 | 1   | .   |                             |        |        |        |         |         |   |

|        |     |     |                             |        |        |        |         |         |   |
|--------|-----|-----|-----------------------------|--------|--------|--------|---------|---------|---|
| 3283   | OD1 | OD1 | . ASN ASN ASN A A 429 429 . | 0.3085 | 0.2961 | 0.3026 | 0.0241  | -0.0512 |   |
| 0.0243 | 1   | .   |                             |        |        |        |         |         |   |
| 3284   | ND2 | ND2 | . ASN ASN ASN A A 429 429 . | 0.3772 | 0.4468 | 0.3373 | 0.0304  | -0.0618 |   |
| 0.0243 | 1   | .   |                             |        |        |        |         |         |   |
| 3285   | C   | C   | . ASN ASN ASN A A 429 429 . | 0.1096 | 0.1116 | 0.0942 | 0.0012  | -0.0023 |   |
| 0.0065 | 1   | .   |                             |        |        |        |         |         |   |
| 3286   | O   | O   | . ASN ASN ASN A A 429 429 . | 0.0919 | 0.0869 | 0.0798 | -0.0052 | 0.0100  |   |
| 0.0016 | 1   | .   |                             |        |        |        |         |         |   |
| 3287   | N   | N   | . PRO PRO PRO A A 430 430 . | 0.0906 | 0.0847 | 0.0660 | -0.0115 | 0.0017  |   |
| 0.0062 | 1   | .   |                             |        |        |        |         |         |   |
| 3288   | CA  | CA  | . PRO PRO PRO A A 430 430 . | 0.0874 | 0.0968 | 0.0667 | -0.0109 | 0.0027  | - |
| 0.0007 | 1   | .   |                             |        |        |        |         |         |   |
| 3289   | CB  | CB  | . PRO PRO PRO A A 430 430 . | 0.0963 | 0.0837 | 0.0728 | -0.0086 | -0.0114 |   |
| 0.0145 | 1   | .   |                             |        |        |        |         |         |   |
| 3290   | CG  | CG  | . PRO PRO PRO A A 430 430 . | 0.1167 | 0.0964 | 0.0718 | 0.0090  | 0.0063  |   |
| 0.0000 | 1   | .   |                             |        |        |        |         |         |   |
| 3291   | CD  | CD  | . PRO PRO PRO A A 430 430 . | 0.0775 | 0.0630 | 0.0688 | -0.0050 | 0.0111  | - |
| 0.0213 | 1   | .   |                             |        |        |        |         |         |   |
| 3292   | C   | C   | . PRO PRO PRO A A 430 430 . | 0.0796 | 0.0825 | 0.0692 | -0.0158 | -0.0027 | - |
| 0.0109 | 1   | .   |                             |        |        |        |         |         |   |
| 3293   | O   | O   | . PRO PRO PRO A A 430 430 . | 0.0924 | 0.0996 | 0.0676 | -0.0252 | 0.0024  | - |
| 0.0052 | 1   | .   |                             |        |        |        |         |         |   |
| 3294   | N   | N   | . SER SER SER A A 431 431 . | 0.0961 | 0.1255 | 0.0836 | -0.0145 | -0.0099 |   |
| 0.0005 | 1   | .   |                             |        |        |        |         |         |   |
| 3295   | CA  | CA  | . SER SER SER A A 431 431 . | 0.1697 | 0.1751 | 0.1588 | -0.0110 | 0.0008  |   |
| 0.0037 | 1   | .   |                             |        |        |        |         |         |   |
| 3296   | CB  | CB  | . SER SER SER A A 431 431 . | 0.1756 | 0.1824 | 0.1637 | -0.0048 | 0.0019  |   |
| 0.0053 | 1   | .   |                             |        |        |        |         |         |   |
| 3297   | OG  | OG  | . SER SER SER A A 431 431 . | 0.2593 | 0.2598 | 0.2500 | -0.0348 | -0.0220 |   |
| 0.0231 | 1   | .   |                             |        |        |        |         |         |   |
| 3298   | C   | C   | . SER SER SER A A 431 431 . | 0.1783 | 0.1912 | 0.1741 | -0.0109 | -0.0015 |   |
| 0.0044 | 1   | .   |                             |        |        |        |         |         |   |
| 3299   | O   | O   | . SER SER SER A A 431 431 . | 0.2096 | 0.2490 | 0.1841 | -0.0023 | 0.0023  |   |
| 0.0005 | 1   | .   |                             |        |        |        |         |         |   |
| 3300   | N   | N   | . VAL VAL VAL A A 432 432 . | 0.1784 | 0.1778 | 0.1684 | -0.0124 | -0.0060 |   |
| 0.0014 | 1   | .   |                             |        |        |        |         |         |   |
| 3301   | CA  | CA  | . VAL VAL VAL A A 432 432 . | 0.1657 | 0.1650 | 0.1606 | -0.0141 | -0.0026 | - |
| 0.0013 | 1   | .   |                             |        |        |        |         |         |   |
| 3302   | CB  | CB  | . VAL VAL VAL A A 432 432 . | 0.1567 | 0.1772 | 0.1522 | -0.0193 | -0.0153 | - |
| 0.0018 | 1   | .   |                             |        |        |        |         |         |   |
| 3303   | CG1 | CG1 | . VAL VAL VAL A A 432 432 . | 0.1739 | 0.1735 | 0.0981 | -0.0061 | -0.0012 | - |
| 0.0708 | 1   | .   |                             |        |        |        |         |         |   |
| 3304   | CG2 | CG2 | . VAL VAL VAL A A 432 432 . | 0.1234 | 0.1432 | 0.1234 | -0.0363 | -0.0458 |   |
| 0.0068 | 1   | .   |                             |        |        |        |         |         |   |
| 3305   | C   | C   | . VAL VAL VAL A A 432 432 . | 0.1663 | 0.1851 | 0.1655 | -0.0096 | 0.0070  |   |
| 0.0001 | 1   | .   |                             |        |        |        |         |         |   |
| 3306   | O   | O   | . VAL VAL VAL A A 432 432 . | 0.1927 | 0.2158 | 0.1702 | -0.0208 | 0.0109  | - |
| 0.0203 | 1   | .   |                             |        |        |        |         |         |   |
| 3307   | N   | N   | . LEU LEU LEU A A 433 433 . | 0.1515 | 0.1539 | 0.1359 | -0.0099 | -0.0050 |   |
| 0.0061 | 1   | .   |                             |        |        |        |         |         |   |
| 3308   | CA  | CA  | . LEU LEU LEU A A 433 433 . | 0.1642 | 0.1633 | 0.1358 | -0.0047 | 0.0093  |   |
| 0.0037 | 1   | .   |                             |        |        |        |         |         |   |
| 3309   | CB  | CB  | . LEU LEU LEU A A 433 433 . | 0.1712 | 0.1375 | 0.1274 | -0.0150 | 0.0063  |   |
| 0.0267 | 1   | .   |                             |        |        |        |         |         |   |
| 3310   | CG  | CG  | . LEU LEU LEU A A 433 433 . | 0.1555 | 0.1799 | 0.1523 | -0.0112 | 0.0055  | - |
| 0.0099 | 1   | .   |                             |        |        |        |         |         |   |
| 3311   | CD1 | CD1 | . LEU LEU LEU A A 433 433 . | 0.1401 | 0.1368 | 0.1302 | -0.0333 | -0.0276 |   |
| 0.0059 | 1   | .   |                             |        |        |        |         |         |   |
| 3312   | CD2 | CD2 | . LEU LEU LEU A A 433 433 . | 0.1687 | 0.1163 | 0.1489 | -0.0545 | 0.0044  |   |
| 0.0093 | 1   | .   |                             |        |        |        |         |         |   |

|        |      |      |                             |        |        |        |         |         |   |
|--------|------|------|-----------------------------|--------|--------|--------|---------|---------|---|
| 3313   | C    | C    | . LEU LEU LEU A A 433 433 . | 0.1695 | 0.1610 | 0.1317 | -0.0137 | 0.0063  |   |
| 0.0227 | 1    | .    |                             |        |        |        |         |         |   |
| 3314   | O    | O    | . LEU LEU LEU A A 433 433 . | 0.2111 | 0.1969 | 0.1876 | -0.0143 | 0.0169  | - |
| 0.0374 | 1    | .    |                             |        |        |        |         |         |   |
| 3315   | MG+2 | MG+2 | . MG2 MG2 MG2 A . 599 599 . | 0.0253 | 0.0253 | 0.0253 | 0.0000  | 0.0000  |   |
| 0.0000 | 1    | .    |                             |        |        |        |         |         |   |
| 3316   | MG+2 | MG+2 | . MG2 MG2 MG2 A . 600 600 . | 0.0253 | 0.0253 | 0.0253 | 0.0000  | 0.0000  |   |
| 0.0000 | 1    | .    |                             |        |        |        |         |         |   |
| 3317   | O4P  | O4P  | . 2PG 2PG 2PG A . 601 601 . | 0.0253 | 0.0253 | 0.0253 | 0.0000  | 0.0000  |   |
| 0.0000 | 1    | .    |                             |        |        |        |         |         |   |
| 3318   | P    | P    | . 2PG 2PG 2PG A . 601 601 . | 0.0253 | 0.0253 | 0.0253 | 0.0000  | 0.0000  |   |
| 0.0000 | 1    | .    |                             |        |        |        |         |         |   |
| 3319   | O2P  | O2P  | . 2PG 2PG 2PG A . 601 601 . | 0.0253 | 0.0253 | 0.0253 | 0.0000  | 0.0000  |   |
| 0.0000 | 1    | .    |                             |        |        |        |         |         |   |
| 3320   | O3P  | O3P  | . 2PG 2PG 2PG A . 601 601 . | 0.0253 | 0.0253 | 0.0253 | 0.0000  | 0.0000  |   |
| 0.0000 | 1    | .    |                             |        |        |        |         |         |   |
| 3321   | O1P  | O1P  | . 2PG 2PG 2PG A . 601 601 . | 0.0283 | 0.0258 | 0.0255 | -0.0012 | 0.0008  | - |
| 0.0003 | 1    | .    |                             |        |        |        |         |         |   |
| 3322   | C2   | C2   | . 2PG 2PG 2PG A . 601 601 . | 0.0924 | 0.1098 | 0.0682 | 0.0118  | 0.0066  |   |
| 0.0076 | 1    | .    |                             |        |        |        |         |         |   |
| 3323   | C1   | C1   | . 2PG 2PG 2PG A . 601 601 . | 0.0576 | 0.0994 | 0.0640 | 0.0109  | -0.0068 |   |
| 0.0055 | 1    | .    |                             |        |        |        |         |         |   |
| 3324   | O2   | O2   | . 2PG 2PG 2PG A . 601 601 . | 0.0850 | 0.0895 | 0.0869 | 0.0339  | -0.0102 | - |
| 0.0172 | 1    | .    |                             |        |        |        |         |         |   |
| 3325   | O1   | O1   | . 2PG 2PG 2PG A . 601 601 . | 0.0267 | 0.0269 | 0.0394 | -0.0014 | 0.0044  | - |
| 0.0047 | 1    | .    |                             |        |        |        |         |         |   |
| 3326   | C3   | C3   | . 2PG 2PG 2PG A . 601 601 . | 0.1408 | 0.1583 | 0.1650 | 0.0250  | 0.0301  | - |
| 0.0267 | 1    | .    |                             |        |        |        |         |         |   |
| 3327   | O3   | O3   | . 2PG 2PG 2PG A . 601 601 . | 0.1859 | 0.2033 | 0.2256 | 0.0112  | 0.0314  | - |
| 0.0070 | 1    | .    |                             |        |        |        |         |         |   |
| 3328   | O    | O    | . HOH HOH HOH A . 446 446 . | 0.0253 | 0.0253 | 0.0253 | 0.0000  | 0.0000  |   |
| 0.0000 | 1    | .    |                             |        |        |        |         |         |   |
| 3329   | O    | O    | . HOH HOH HOH A . 447 447 . | 0.0308 | 0.0267 | 0.0297 | -0.0027 | -0.0049 |   |
| 0.0024 | 1    | .    |                             |        |        |        |         |         |   |
| 3330   | O    | O    | . HOH HOH HOH A . 448 448 . | 0.0253 | 0.0253 | 0.0253 | 0.0000  | 0.0000  |   |
| 0.0000 | 1    | .    |                             |        |        |        |         |         |   |
| 3331   | O3   | O3   | . TRS TRS TRS A . 460 460 . | 0.3543 | 0.3704 | 0.4034 | 0.0197  | 0.0514  | - |
| 0.0231 | 1    | .    |                             |        |        |        |         |         |   |
| 3332   | C3   | C3   | . TRS TRS TRS A . 460 460 . | 0.3259 | 0.3459 | 0.3532 | 0.0084  | 0.0166  | - |
| 0.0023 | 1    | .    |                             |        |        |        |         |         |   |
| 3333   | C    | C    | . TRS TRS TRS A . 460 460 . | 0.3398 | 0.3385 | 0.3479 | 0.0017  | 0.0031  | - |
| 0.0035 | 1    | .    |                             |        |        |        |         |         |   |
| 3334   | N    | N    | . TRS TRS TRS A . 460 460 . | 0.3267 | 0.3272 | 0.3344 | -0.0026 | 0.0176  |   |
| 0.0014 | 1    | .    |                             |        |        |        |         |         |   |
| 3335   | C2   | C2   | . TRS TRS TRS A . 460 460 . | 0.3497 | 0.3480 | 0.3590 | 0.0104  | 0.0003  | - |
| 0.0003 | 1    | .    |                             |        |        |        |         |         |   |
| 3336   | O2   | O2   | . TRS TRS TRS A . 460 460 . | 0.3467 | 0.3262 | 0.3878 | 0.0444  | -0.0105 | - |
| 0.0415 | 1    | .    |                             |        |        |        |         |         |   |
| 3337   | C1   | C1   | . TRS TRS TRS A . 460 460 . | 0.3212 | 0.3240 | 0.3259 | 0.0005  | 0.0102  |   |
| 0.0033 | 1    | .    |                             |        |        |        |         |         |   |
| 3338   | O1   | O1   | . TRS TRS TRS A . 460 460 . | 0.2503 | 0.2285 | 0.2858 | -0.0018 | -0.0350 | - |
| 0.0217 | 1    | .    |                             |        |        |        |         |         |   |
| 3339   | N    | N    | . SER SER SER B B 1 1 .     | 0.2584 | 0.2389 | 0.2776 | -0.0244 | -0.0078 |   |
| 0.0045 | 1    | .    |                             |        |        |        |         |         |   |
| 3340   | CA   | CA   | . SER SER SER B B 1 1 .     | 0.2398 | 0.2498 | 0.2551 | -0.0068 | -0.0015 |   |
| 0.0012 | 1    | .    |                             |        |        |        |         |         |   |
| 3341   | CB   | CB   | . SER SER SER B B 1 1 .     | 0.2595 | 0.2551 | 0.2768 | -0.0090 | -0.0064 |   |
| 0.0074 | 1    | .    |                             |        |        |        |         |         |   |
| 3342   | OG   | OG   | . SER SER SER B B 1 1 .     | 0.2809 | 0.3408 | 0.2812 | -0.0040 | -0.0069 |   |
| 0.0124 | 1    | .    |                             |        |        |        |         |         |   |





|        |     |     |                     |   |          |        |        |         |         |
|--------|-----|-----|---------------------|---|----------|--------|--------|---------|---------|
| 3373   | CB  | CB  | . ILE ILE ILE B B 5 | 5 | . 0.0666 | 0.0631 | 0.0814 | -0.0236 | -0.0037 |
| 0.0123 | 1   | .   |                     |   |          |        |        |         |         |
| 3374   | CG1 | CG1 | . ILE ILE ILE B B 5 | 5 | . 0.0840 | 0.0982 | 0.0746 | 0.0290  | -0.0026 |
| 0.0075 | 1   | .   |                     |   |          |        |        |         | -       |
| 3375   | CD1 | CD1 | . ILE ILE ILE B B 5 | 5 | . 0.0826 | 0.0684 | 0.0775 | 0.0190  | 0.0423  |
| 0.0277 | 1   | .   |                     |   |          |        |        |         |         |
| 3376   | CG2 | CG2 | . ILE ILE ILE B B 5 | 5 | . 0.0886 | 0.0894 | 0.1034 | -0.0112 | 0.0071  |
| 0.0199 | 1   | .   |                     |   |          |        |        |         |         |
| 3377   | C   | C   | . ILE ILE ILE B B 5 | 5 | . 0.0531 | 0.0670 | 0.0590 | 0.0054  | 0.0029  |
| 0.0054 | 1   | .   |                     |   |          |        |        |         |         |
| 3378   | O   | O   | . ILE ILE ILE B B 5 | 5 | . 0.0740 | 0.0895 | 0.1153 | 0.0019  | -0.0029 |
| 0.0184 | 1   | .   |                     |   |          |        |        |         | -       |
| 3379   | N   | N   | . TRP TRP TRP B B 6 | 6 | . 0.0382 | 0.0320 | 0.0337 | 0.0076  | 0.0058  |
| 0.0056 | 1   | .   |                     |   |          |        |        |         |         |
| 3380   | CA  | CA  | . TRP TRP TRP B B 6 | 6 | . 0.0266 | 0.0455 | 0.0497 | 0.0037  | 0.0056  |
| 0.0128 | 1   | .   |                     |   |          |        |        |         |         |
| 3381   | CB  | CB  | . TRP TRP TRP B B 6 | 6 | . 0.0548 | 0.0659 | 0.0555 | -0.0026 | -0.0063 |
| 0.0171 | 1   | .   |                     |   |          |        |        |         |         |
| 3382   | CG  | CG  | . TRP TRP TRP B B 6 | 6 | . 0.0875 | 0.0818 | 0.0872 | -0.0169 | 0.0150  |
| 0.0242 | 1   | .   |                     |   |          |        |        |         |         |
| 3383   | CD1 | CD1 | . TRP TRP TRP B B 6 | 6 | . 0.1061 | 0.0843 | 0.1108 | 0.0006  | -0.0280 |
| 0.0272 | 1   | .   |                     |   |          |        |        |         |         |
| 3384   | NE1 | NE1 | . TRP TRP TRP B B 6 | 6 | . 0.1478 | 0.1523 | 0.1375 | -0.0056 | -0.0001 |
| 0.0025 | 1   | .   |                     |   |          |        |        |         |         |
| 3385   | CE2 | CE2 | . TRP TRP TRP B B 6 | 6 | . 0.1317 | 0.1211 | 0.1326 | -0.0106 | 0.0208  |
| 0.0044 | 1   | .   |                     |   |          |        |        |         | -       |
| 3386   | CD2 | CD2 | . TRP TRP TRP B B 6 | 6 | . 0.0880 | 0.0886 | 0.0569 | -0.0084 | 0.0122  |
| 0.0256 | 1   | .   |                     |   |          |        |        |         |         |
| 3387   | CE3 | CE3 | . TRP TRP TRP B B 6 | 6 | . 0.1044 | 0.1217 | 0.0822 | 0.0066  | 0.0262  |
| 0.0089 | 1   | .   |                     |   |          |        |        |         |         |
| 3388   | CZ3 | CZ3 | . TRP TRP TRP B B 6 | 6 | . 0.1491 | 0.1386 | 0.1652 | 0.0058  | -0.0065 |
| 0.0148 | 1   | .   |                     |   |          |        |        |         | -       |
| 3389   | CH2 | CH2 | . TRP TRP TRP B B 6 | 6 | . 0.1220 | 0.1855 | 0.1384 | -0.0169 | 0.0171  |
| 0.0171 | 1   | .   |                     |   |          |        |        |         | -       |
| 3390   | CZ2 | CZ2 | . TRP TRP TRP B B 6 | 6 | . 0.1504 | 0.1431 | 0.1769 | -0.0144 | -0.0041 |
| 0.0072 | 1   | .   |                     |   |          |        |        |         | -       |
| 3391   | C   | C   | . TRP TRP TRP B B 6 | 6 | . 0.0263 | 0.0285 | 0.0327 | 0.0017  | 0.0027  |
| 0.0048 | 1   | .   |                     |   |          |        |        |         |         |
| 3392   | O   | O   | . TRP TRP TRP B B 6 | 6 | . 0.0474 | 0.0488 | 0.0431 | -0.0015 | 0.0108  |
| 0.0029 | 1   | .   |                     |   |          |        |        |         |         |
| 3393   | N   | N   | . ALA ALA ALA B B 7 | 7 | . 0.0253 | 0.0253 | 0.0253 | 0.0000  | 0.0000  |
| 0.0000 | 1   | .   |                     |   |          |        |        |         |         |
| 3394   | CA  | CA  | . ALA ALA ALA B B 7 | 7 | . 0.0253 | 0.0255 | 0.0255 | 0.0001  | 0.0001  |
| 0.0002 | 1   | .   |                     |   |          |        |        |         |         |
| 3395   | CB  | CB  | . ALA ALA ALA B B 7 | 7 | . 0.0253 | 0.0253 | 0.0253 | 0.0000  | 0.0000  |
| 0.0000 | 1   | .   |                     |   |          |        |        |         |         |
| 3396   | C   | C   | . ALA ALA ALA B B 7 | 7 | . 0.0253 | 0.0253 | 0.0253 | 0.0000  | 0.0000  |
| 0.0000 | 1   | .   |                     |   |          |        |        |         |         |
| 3397   | O   | O   | . ALA ALA ALA B B 7 | 7 | . 0.0353 | 0.0335 | 0.0270 | 0.0090  | 0.0041  |
| 0.0037 | 1   | .   |                     |   |          |        |        |         |         |
| 3398   | N   | N   | . ARG ARG ARG B B 8 | 8 | . 0.0261 | 0.0271 | 0.0255 | 0.0012  | 0.0004  |
| 0.0006 | 1   | .   |                     |   |          |        |        |         |         |
| 3399   | CA  | CA  | . ARG ARG ARG B B 8 | 8 | . 0.0253 | 0.0253 | 0.0253 | 0.0000  | 0.0000  |
| 0.0000 | 1   | .   |                     |   |          |        |        |         |         |
| 3400   | CB  | CB  | . ARG ARG ARG B B 8 | 8 | . 0.0253 | 0.0253 | 0.0253 | 0.0000  | 0.0000  |
| 0.0000 | 1   | .   |                     |   |          |        |        |         |         |
| 3401   | CG  | CG  | . ARG ARG ARG B B 8 | 8 | . 0.0348 | 0.0330 | 0.0364 | 0.0085  | 0.0102  |
| 0.0092 | 1   | .   |                     |   |          |        |        |         |         |
| 3402   | CD  | CD  | . ARG ARG ARG B B 8 | 8 | . 0.0369 | 0.0516 | 0.0480 | 0.0135  | 0.0075  |
| 0.0224 | 1   | .   |                     |   |          |        |        |         |         |



|        |     |     |                           |        |        |        |         |         |   |
|--------|-----|-----|---------------------------|--------|--------|--------|---------|---------|---|
| 3433   | O   | O   | . LEU LEU LEU B B 11 11 . | 0.0253 | 0.0253 | 0.0253 | 0.0000  | 0.0000  |   |
| 0.0000 | 1   | .   |                           |        |        |        |         |         |   |
| 3434   | N   | N   | . ASP ASP ASP B B 12 12 . | 0.0253 | 0.0253 | 0.0253 | 0.0000  | 0.0000  |   |
| 0.0000 | 1   | .   |                           |        |        |        |         |         |   |
| 3435   | CA  | CA  | . ASP ASP ASP B B 12 12 . | 0.0253 | 0.0253 | 0.0253 | 0.0000  | 0.0000  |   |
| 0.0000 | 1   | .   |                           |        |        |        |         |         |   |
| 3436   | CB  | CB  | . ASP ASP ASP B B 12 12 . | 0.0253 | 0.0253 | 0.0253 | 0.0000  | 0.0000  |   |
| 0.0000 | 1   | .   |                           |        |        |        |         |         |   |
| 3437   | CG  | CG  | . ASP ASP ASP B B 12 12 . | 0.0253 | 0.0253 | 0.0253 | 0.0000  | 0.0000  |   |
| 0.0000 | 1   | .   |                           |        |        |        |         |         |   |
| 3438   | OD1 | OD1 | . ASP ASP ASP B B 12 12 . | 0.0285 | 0.0259 | 0.0349 | -0.0002 | 0.0039  | - |
| 0.0019 | 1   | .   |                           |        |        |        |         |         |   |
| 3439   | OD2 | OD2 | . ASP ASP ASP B B 12 12 . | 0.0445 | 0.0306 | 0.0262 | -0.0003 | -0.0041 | - |
| 0.0002 | 1   | .   |                           |        |        |        |         |         |   |
| 3440   | C   | C   | . ASP ASP ASP B B 12 12 . | 0.0253 | 0.0253 | 0.0253 | 0.0000  | 0.0000  |   |
| 0.0000 | 1   | .   |                           |        |        |        |         |         |   |
| 3441   | O   | O   | . ASP ASP ASP B B 12 12 . | 0.0253 | 0.0253 | 0.0253 | 0.0000  | 0.0000  |   |
| 0.0000 | 1   | .   |                           |        |        |        |         |         |   |
| 3442   | N   | N   | . SER SER SER B B 13 13 . | 0.0253 | 0.0253 | 0.0253 | 0.0000  | 0.0000  |   |
| 0.0000 | 1   | .   |                           |        |        |        |         |         |   |
| 3443   | CA  | CA  | . SER SER SER B B 13 13 . | 0.0253 | 0.0253 | 0.0253 | 0.0000  | 0.0000  |   |
| 0.0000 | 1   | .   |                           |        |        |        |         |         |   |
| 3444   | CB  | CB  | . SER SER SER B B 13 13 . | 0.0253 | 0.0253 | 0.0253 | 0.0000  | 0.0000  |   |
| 0.0000 | 1   | .   |                           |        |        |        |         |         |   |
| 3445   | OG  | OG  | . SER SER SER B B 13 13 . | 0.0253 | 0.0253 | 0.0253 | 0.0000  | 0.0000  |   |
| 0.0000 | 1   | .   |                           |        |        |        |         |         |   |
| 3446   | C   | C   | . SER SER SER B B 13 13 . | 0.0253 | 0.0253 | 0.0253 | 0.0000  | 0.0000  |   |
| 0.0000 | 1   | .   |                           |        |        |        |         |         |   |
| 3447   | O   | O   | . SER SER SER B B 13 13 . | 0.0253 | 0.0253 | 0.0253 | 0.0000  | 0.0000  |   |
| 0.0000 | 1   | .   |                           |        |        |        |         |         |   |
| 3448   | N   | N   | . ARG ARG ARG B B 14 14 . | 0.0253 | 0.0253 | 0.0253 | 0.0000  | 0.0000  |   |
| 0.0000 | 1   | .   |                           |        |        |        |         |         |   |
| 3449   | CA  | CA  | . ARG ARG ARG B B 14 14 . | 0.0253 | 0.0253 | 0.0253 | 0.0000  | 0.0000  |   |
| 0.0000 | 1   | .   |                           |        |        |        |         |         |   |
| 3450   | CB  | CB  | . ARG ARG ARG B B 14 14 . | 0.0428 | 0.0293 | 0.0268 | -0.0084 | 0.0051  | - |
| 0.0024 | 1   | .   |                           |        |        |        |         |         |   |
| 3451   | CG  | CG  | . ARG ARG ARG B B 14 14 . | 0.1412 | 0.0803 | 0.1177 | 0.0179  | 0.0242  | - |
| 0.0169 | 1   | .   |                           |        |        |        |         |         |   |
| 3452   | CD  | CD  | . ARG ARG ARG B B 14 14 . | 0.1168 | 0.1195 | 0.1349 | 0.0019  | -0.0116 |   |
| 0.0084 | 1   | .   |                           |        |        |        |         |         |   |
| 3453   | NE  | NE  | . ARG ARG ARG B B 14 14 . | 0.1221 | 0.1220 | 0.1220 | -0.0093 | 0.0265  |   |
| 0.0278 | 1   | .   |                           |        |        |        |         |         |   |
| 3454   | CZ  | CZ  | . ARG ARG ARG B B 14 14 . | 0.0375 | 0.0328 | 0.0368 | -0.0086 | -0.0011 | - |
| 0.0031 | 1   | .   |                           |        |        |        |         |         |   |
| 3455   | NH1 | NH1 | . ARG ARG ARG B B 14 14 . | 0.0325 | 0.0253 | 0.0281 | 0.0006  | -0.0044 | - |
| 0.0003 | 1   | .   |                           |        |        |        |         |         |   |
| 3456   | NH2 | NH2 | . ARG ARG ARG B B 14 14 . | 0.0363 | 0.0269 | 0.0392 | -0.0041 | 0.0108  | - |
| 0.0042 | 1   | .   |                           |        |        |        |         |         |   |
| 3457   | C   | C   | . ARG ARG ARG B B 14 14 . | 0.0253 | 0.0253 | 0.0253 | 0.0000  | 0.0000  |   |
| 0.0000 | 1   | .   |                           |        |        |        |         |         |   |
| 3458   | O   | O   | . ARG ARG ARG B B 14 14 . | 0.0295 | 0.0275 | 0.0257 | -0.0030 | -0.0013 |   |
| 0.0009 | 1   | .   |                           |        |        |        |         |         |   |
| 3459   | N   | N   | . GLY GLY GLY B B 15 15 . | 0.0253 | 0.0253 | 0.0253 | 0.0000  | 0.0000  |   |
| 0.0000 | 1   | .   |                           |        |        |        |         |         |   |
| 3460   | CA  | CA  | . GLY GLY GLY B B 15 15 . | 0.0253 | 0.0253 | 0.0253 | 0.0000  | 0.0000  |   |
| 0.0000 | 1   | .   |                           |        |        |        |         |         |   |
| 3461   | C   | C   | . GLY GLY GLY B B 15 15 . | 0.0253 | 0.0253 | 0.0253 | 0.0000  | 0.0000  |   |
| 0.0000 | 1   | .   |                           |        |        |        |         |         |   |
| 3462   | O   | O   | . GLY GLY GLY B B 15 15 . | 0.0282 | 0.0311 | 0.0328 | 0.0023  | 0.0032  |   |
| 0.0065 | 1   | .   |                           |        |        |        |         |         |   |



















|        |     |     |                         |                                         |
|--------|-----|-----|-------------------------|-----------------------------------------|
| 3703   | CD2 | CD2 | . LEU LEU LEU B B 48 48 | . 0.0532 0.0518 0.0534 0.0257 0.0193    |
| 0.0114 | 1   | .   |                         |                                         |
| 3704   | C   | C   | . LEU LEU LEU B B 48 48 | . 0.0406 0.0291 0.0366 -0.0037 0.0003   |
| 0.0020 | 1   | .   |                         |                                         |
| 3705   | O   | O   | . LEU LEU LEU B B 48 48 | . 0.0565 0.0386 0.0546 0.0148 0.0155 -  |
| 0.0041 | 1   | .   |                         |                                         |
| 3706   | N   | N   | . ARG ARG ARG B B 49 49 | . 0.0321 0.0457 0.0490 0.0060 -0.0054 - |
| 0.0075 | 1   | .   |                         |                                         |
| 3707   | CA  | CA  | . ARG ARG ARG B B 49 49 | . 0.0396 0.0321 0.0302 0.0016 0.0000 -  |
| 0.0056 | 1   | .   |                         |                                         |
| 3708   | CB  | CB  | . ARG ARG ARG B B 49 49 | . 0.0405 0.0630 0.0536 0.0137 -0.0081 - |
| 0.0222 | 1   | .   |                         |                                         |
| 3709   | CG  | CG  | . ARG ARG ARG B B 49 49 | . 0.0897 0.1110 0.1245 0.0116 -0.0033 - |
| 0.0225 | 1   | .   |                         |                                         |
| 3710   | CD  | CD  | . ARG ARG ARG B B 49 49 | . 0.1565 0.0676 0.0964 -0.0070 0.0047   |
| 0.0045 | 1   | .   |                         |                                         |
| 3711   | NE  | NE  | . ARG ARG ARG B B 49 49 | . 0.1317 0.0538 0.0729 0.0322 0.0124    |
| 0.0002 | 1   | .   |                         |                                         |
| 3712   | CZ  | CZ  | . ARG ARG ARG B B 49 49 | . 0.1043 0.0643 0.0500 0.0163 0.0071    |
| 0.0096 | 1   | .   |                         |                                         |
| 3713   | NH1 | NH1 | . ARG ARG ARG B B 49 49 | . 0.0511 0.0326 0.0372 0.0000 0.0052 -  |
| 0.0089 | 1   | .   |                         |                                         |
| 3714   | NH2 | NH2 | . ARG ARG ARG B B 49 49 | . 0.0657 0.0586 0.0679 0.0135 0.0073 -  |
| 0.0178 | 1   | .   |                         |                                         |
| 3715   | C   | C   | . ARG ARG ARG B B 49 49 | . 0.0464 0.0341 0.0330 0.0120 -0.0017 - |
| 0.0047 | 1   | .   |                         |                                         |
| 3716   | O   | O   | . ARG ARG ARG B B 49 49 | . 0.0964 0.0958 0.0814 0.0157 -0.0074   |
| 0.0030 | 1   | .   |                         |                                         |
| 3717   | N   | N   | . ASP ASP ASP B B 50 50 | . 0.0320 0.0419 0.0257 0.0105 0.0015    |
| 0.0025 | 1   | .   |                         |                                         |
| 3718   | CA  | CA  | . ASP ASP ASP B B 50 50 | . 0.0645 0.0422 0.0453 0.0017 0.0037 -  |
| 0.0018 | 1   | .   |                         |                                         |
| 3719   | CB  | CB  | . ASP ASP ASP B B 50 50 | . 0.0584 0.0473 0.0300 0.0104 -0.0065   |
| 0.0059 | 1   | .   |                         |                                         |
| 3720   | CG  | CG  | . ASP ASP ASP B B 50 50 | . 0.0850 0.0959 0.0859 0.0045 -0.0198   |
| 0.0021 | 1   | .   |                         |                                         |
| 3721   | OD1 | OD1 | . ASP ASP ASP B B 50 50 | . 0.0449 0.0366 0.0403 0.0078 -0.0054   |
| 0.0083 | 1   | .   |                         |                                         |
| 3722   | OD2 | OD2 | . ASP ASP ASP B B 50 50 | . 0.1056 0.0532 0.0784 0.0116 0.0126    |
| 0.0054 | 1   | .   |                         |                                         |
| 3723   | C   | C   | . ASP ASP ASP B B 50 50 | . 0.0677 0.0746 0.0659 0.0046 -0.0059 - |
| 0.0001 | 1   | .   |                         |                                         |
| 3724   | O   | O   | . ASP ASP ASP B B 50 50 | . 0.0981 0.0771 0.0864 0.0124 0.0000 -  |
| 0.0158 | 1   | .   |                         |                                         |
| 3725   | N   | N   | . GLY GLY GLY B B 51 51 | . 0.0970 0.0887 0.1028 0.0033 0.0034 -  |
| 0.0127 | 1   | .   |                         |                                         |
| 3726   | CA  | CA  | . GLY GLY GLY B B 51 51 | . 0.1090 0.1150 0.1173 -0.0013 0.0126 - |
| 0.0028 | 1   | .   |                         |                                         |
| 3727   | C   | C   | . GLY GLY GLY B B 51 51 | . 0.1305 0.1204 0.1224 0.0020 -0.0022 - |
| 0.0152 | 1   | .   |                         |                                         |
| 3728   | O   | O   | . GLY GLY GLY B B 51 51 | . 0.1756 0.1185 0.1686 -0.0082 0.0015   |
| 0.0083 | 1   | .   |                         |                                         |
| 3729   | N   | N   | . ASP ASP ASP B B 52 52 | . 0.1302 0.0973 0.1318 0.0017 0.0093 -  |
| 0.0118 | 1   | .   |                         |                                         |
| 3730   | CA  | CA  | . ASP ASP ASP B B 52 52 | . 0.1435 0.1357 0.1433 0.0052 -0.0005 - |
| 0.0104 | 1   | .   |                         |                                         |
| 3731   | CB  | CB  | . ASP ASP ASP B B 52 52 | . 0.1549 0.1499 0.1483 0.0169 0.0017 -  |
| 0.0032 | 1   | .   |                         |                                         |
| 3732   | CG  | CG  | . ASP ASP ASP B B 52 52 | . 0.1575 0.1669 0.1598 -0.0001 0.0122 - |
| 0.0167 | 1   | .   |                         |                                         |

|        |     |     |                         |                                          |
|--------|-----|-----|-------------------------|------------------------------------------|
| 3733   | OD1 | OD1 | . ASP ASP ASP B B 52 52 | . 0.2430 0.2151 0.2062 -0.0062 -0.0095 - |
| 0.0227 | 1   | .   |                         |                                          |
| 3734   | OD2 | OD2 | . ASP ASP ASP B B 52 52 | . 0.1891 0.1321 0.1668 0.0193 0.0128 -   |
| 0.0152 | 1   | .   |                         |                                          |
| 3735   | C   | C   | . ASP ASP ASP B B 52 52 | . 0.1644 0.1611 0.1651 0.0068 0.0045 -   |
| 0.0006 | 1   | .   |                         |                                          |
| 3736   | O   | O   | . ASP ASP ASP B B 52 52 | . 0.1924 0.1233 0.1600 0.0036 0.0049 -   |
| 0.0158 | 1   | .   |                         |                                          |
| 3737   | N   | N   | . LYS LYS LYS B B 53 53 | . 0.1956 0.1775 0.1934 -0.0054 0.0012 -  |
| 0.0098 | 1   | .   |                         |                                          |
| 3738   | CA  | CA  | . LYS LYS LYS B B 53 53 | . 0.2160 0.2173 0.2297 -0.0006 0.0021 -  |
| 0.0032 | 1   | .   |                         |                                          |
| 3739   | CB  | CB  | . LYS LYS LYS B B 53 53 | . 0.2448 0.2482 0.2552 -0.0028 0.0095 -  |
| 0.0088 | 1   | .   |                         |                                          |
| 3740   | CG  | CG  | . LYS LYS LYS B B 53 53 | . 0.3147 0.3303 0.3105 0.0111 -0.0095    |
| 0.0046 | 1   | .   |                         |                                          |
| 3741   | CD  | CD  | . LYS LYS LYS B B 53 53 | . 0.3867 0.3543 0.4045 -0.0115 -0.0033   |
| 0.0122 | 1   | .   |                         |                                          |
| 3742   | CE  | CE  | . LYS LYS LYS B B 53 53 | . 0.4430 0.4121 0.4120 0.0052 0.0038 -   |
| 0.0011 | 1   | .   |                         |                                          |
| 3743   | NZ  | NZ  | . LYS LYS LYS B B 53 53 | . 0.4574 0.3449 0.4423 -0.0020 -0.0100 - |
| 0.0284 | 1   | .   |                         |                                          |
| 3744   | C   | C   | . LYS LYS LYS B B 53 53 | . 0.2204 0.2240 0.2391 -0.0043 -0.0011 - |
| 0.0068 | 1   | .   |                         |                                          |
| 3745   | O   | O   | . LYS LYS LYS B B 53 53 | . 0.2418 0.2086 0.2611 0.0084 -0.0111 -  |
| 0.0114 | 1   | .   |                         |                                          |
| 3746   | N   | N   | . GLN GLN GLN B B 54 54 | . 0.2159 0.2051 0.2127 -0.0058 -0.0055 - |
| 0.0106 | 1   | .   |                         |                                          |
| 3747   | CA  | CA  | . GLN GLN GLN B B 54 54 | . 0.2315 0.2013 0.2256 -0.0040 -0.0025 - |
| 0.0017 | 1   | .   |                         |                                          |
| 3748   | CB  | CB  | . GLN GLN GLN B B 54 54 | . 0.2404 0.2324 0.2452 -0.0020 0.0041    |
| 0.0009 | 1   | .   |                         |                                          |
| 3749   | CG  | CG  | . GLN GLN GLN B B 54 54 | . 0.3267 0.2689 0.3159 -0.0051 -0.0130 - |
| 0.0029 | 1   | .   |                         |                                          |
| 3750   | CD  | CD  | . GLN GLN GLN B B 54 54 | . 0.3677 0.3488 0.3976 -0.0260 -0.0016   |
| 0.0012 | 1   | .   |                         |                                          |
| 3751   | OE1 | OE1 | . GLN GLN GLN B B 54 54 | . 0.4187 0.4136 0.4141 -0.0364 -0.0213 - |
| 0.0155 | 1   | .   |                         |                                          |
| 3752   | NE2 | NE2 | . GLN GLN GLN B B 54 54 | . 0.4445 0.4223 0.4019 -0.0285 -0.0115   |
| 0.0160 | 1   | .   |                         |                                          |
| 3753   | C   | C   | . GLN GLN GLN B B 54 54 | . 0.2051 0.1851 0.1962 -0.0021 -0.0081 - |
| 0.0050 | 1   | .   |                         |                                          |
| 3754   | O   | O   | . GLN GLN GLN B B 54 54 | . 0.2251 0.1924 0.1847 0.0101 -0.0176 -  |
| 0.0215 | 1   | .   |                         |                                          |
| 3755   | N   | N   | . ARG ARG ARG B B 55 55 | . 0.1699 0.1399 0.1546 -0.0006 -0.0004 - |
| 0.0055 | 1   | .   |                         |                                          |
| 3756   | CA  | CA  | . ARG ARG ARG B B 55 55 | . 0.0897 0.0837 0.0857 0.0013 -0.0007 -  |
| 0.0060 | 1   | .   |                         |                                          |
| 3757   | CB  | CB  | . ARG ARG ARG B B 55 55 | . 0.0936 0.0922 0.0748 0.0067 0.0170     |
| 0.0032 | 1   | .   |                         |                                          |
| 3758   | CG  | CG  | . ARG ARG ARG B B 55 55 | . 0.0646 0.0607 0.0576 -0.0223 0.0122 -  |
| 0.0079 | 1   | .   |                         |                                          |
| 3759   | CD  | CD  | . ARG ARG ARG B B 55 55 | . 0.0738 0.1018 0.0699 0.0058 -0.0095 -  |
| 0.0015 | 1   | .   |                         |                                          |
| 3760   | NE  | NE  | . ARG ARG ARG B B 55 55 | . 0.0474 0.0601 0.0505 0.0184 -0.0066 -  |
| 0.0061 | 1   | .   |                         |                                          |
| 3761   | CZ  | CZ  | . ARG ARG ARG B B 55 55 | . 0.0276 0.0276 0.0369 0.0019 -0.0052 -  |
| 0.0042 | 1   | .   |                         |                                          |
| 3762   | NH1 | NH1 | . ARG ARG ARG B B 55 55 | . 0.0479 0.0501 0.0373 0.0002 0.0160 -   |
| 0.0039 | 1   | .   |                         |                                          |















































|        |     |     |                             |        |        |        |         |         |   |
|--------|-----|-----|-----------------------------|--------|--------|--------|---------|---------|---|
| 4363   | CD1 | CD1 | . LEU LEU LEU B B 136 136 . | 0.0762 | 0.0775 | 0.0368 | -0.0059 | -0.0240 |   |
| 0.0000 | 1   | .   |                             |        |        |        |         |         |   |
| 4364   | CD2 | CD2 | . LEU LEU LEU B B 136 136 . | 0.1009 | 0.1423 | 0.1108 | 0.0301  | 0.0031  | - |
| 0.0070 | 1   | .   |                             |        |        |        |         |         |   |
| 4365   | C   | C   | . LEU LEU LEU B B 136 136 . | 0.1033 | 0.0818 | 0.0902 | 0.0029  | 0.0034  |   |
| 0.0061 | 1   | .   |                             |        |        |        |         |         |   |
| 4366   | O   | O   | . LEU LEU LEU B B 136 136 . | 0.0918 | 0.1142 | 0.0810 | 0.0214  | -0.0162 |   |
| 0.0159 | 1   | .   |                             |        |        |        |         |         |   |
| 4367   | N   | N   | . ALA ALA ALA B B 137 137 . | 0.0530 | 0.0576 | 0.0575 | 0.0053  | 0.0033  |   |
| 0.0173 | 1   | .   |                             |        |        |        |         |         |   |
| 4368   | CA  | CA  | . ALA ALA ALA B B 137 137 . | 0.0820 | 0.1045 | 0.0726 | 0.0118  | 0.0035  |   |
| 0.0119 | 1   | .   |                             |        |        |        |         |         |   |
| 4369   | CB  | CB  | . ALA ALA ALA B B 137 137 . | 0.0886 | 0.0919 | 0.0725 | -0.0179 | 0.0069  |   |
| 0.0170 | 1   | .   |                             |        |        |        |         |         |   |
| 4370   | C   | C   | . ALA ALA ALA B B 137 137 . | 0.1211 | 0.1271 | 0.1124 | -0.0097 | 0.0008  |   |
| 0.0055 | 1   | .   |                             |        |        |        |         |         |   |
| 4371   | O   | O   | . ALA ALA ALA B B 137 137 . | 0.1474 | 0.1308 | 0.1108 | -0.0083 | 0.0030  |   |
| 0.0138 | 1   | .   |                             |        |        |        |         |         |   |
| 4372   | N   | N   | . GLY GLY GLY B B 138 138 . | 0.1611 | 0.1468 | 0.1261 | 0.0040  | -0.0060 |   |
| 0.0042 | 1   | .   |                             |        |        |        |         |         |   |
| 4373   | CA  | CA  | . GLY GLY GLY B B 138 138 . | 0.1885 | 0.1904 | 0.1765 | -0.0011 | -0.0087 | - |
| 0.0003 | 1   | .   |                             |        |        |        |         |         |   |
| 4374   | C   | C   | . GLY GLY GLY B B 138 138 . | 0.2026 | 0.2029 | 0.1931 | 0.0036  | -0.0018 | - |
| 0.0079 | 1   | .   |                             |        |        |        |         |         |   |
| 4375   | O   | O   | . GLY GLY GLY B B 138 138 . | 0.2358 | 0.2284 | 0.2030 | 0.0118  | -0.0009 |   |
| 0.0086 | 1   | .   |                             |        |        |        |         |         |   |
| 4376   | N   | N   | . ASN ASN ASN B B 139 139 . | 0.2205 | 0.2041 | 0.2013 | -0.0041 | -0.0031 |   |
| 0.0076 | 1   | .   |                             |        |        |        |         |         |   |
| 4377   | CA  | CA  | . ASN ASN ASN B B 139 139 . | 0.2330 | 0.2327 | 0.2269 | -0.0011 | -0.0011 |   |
| 0.0012 | 1   | .   |                             |        |        |        |         |         |   |
| 4378   | CB  | CB  | . ASN ASN ASN B B 139 139 . | 0.2160 | 0.2093 | 0.2055 | -0.0165 | -0.0027 | - |
| 0.0010 | 1   | .   |                             |        |        |        |         |         |   |
| 4379   | CG  | CG  | . ASN ASN ASN B B 139 139 . | 0.2421 | 0.2288 | 0.2244 | -0.0125 | -0.0198 |   |
| 0.0187 | 1   | .   |                             |        |        |        |         |         |   |
| 4380   | OD1 | OD1 | . ASN ASN ASN B B 139 139 . | 0.2636 | 0.2718 | 0.1963 | 0.0005  | -0.0390 |   |
| 0.0055 | 1   | .   |                             |        |        |        |         |         |   |
| 4381   | ND2 | ND2 | . ASN ASN ASN B B 139 139 . | 0.2255 | 0.1829 | 0.1804 | 0.0078  | -0.0356 |   |
| 0.0165 | 1   | .   |                             |        |        |        |         |         |   |
| 4382   | C   | C   | . ASN ASN ASN B B 139 139 . | 0.2547 | 0.2470 | 0.2528 | -0.0105 | -0.0016 | - |
| 0.0016 | 1   | .   |                             |        |        |        |         |         |   |
| 4383   | O   | O   | . ASN ASN ASN B B 139 139 . | 0.2801 | 0.2512 | 0.2666 | -0.0239 | -0.0028 | - |
| 0.0181 | 1   | .   |                             |        |        |        |         |         |   |
| 4384   | N   | N   | . SER SER SER B B 140 140 . | 0.2815 | 0.2892 | 0.2832 | -0.0019 | 0.0041  |   |
| 0.0004 | 1   | .   |                             |        |        |        |         |         |   |
| 4385   | CA  | CA  | . SER SER SER B B 140 140 . | 0.3117 | 0.3027 | 0.3092 | 0.0014  | 0.0019  | - |
| 0.0016 | 1   | .   |                             |        |        |        |         |         |   |
| 4386   | CB  | CB  | . SER SER SER B B 140 140 . | 0.3131 | 0.3071 | 0.3140 | -0.0013 | -0.0010 | - |
| 0.0001 | 1   | .   |                             |        |        |        |         |         |   |
| 4387   | OG  | OG  | . SER SER SER B B 140 140 . | 0.3702 | 0.3406 | 0.3328 | 0.0172  | 0.0121  | - |
| 0.0019 | 1   | .   |                             |        |        |        |         |         |   |
| 4388   | C   | C   | . SER SER SER B B 140 140 . | 0.3309 | 0.3254 | 0.3221 | -0.0018 | -0.0031 |   |
| 0.0023 | 1   | .   |                             |        |        |        |         |         |   |
| 4389   | O   | O   | . SER SER SER B B 140 140 . | 0.3587 | 0.3369 | 0.3515 | -0.0005 | -0.0026 |   |
| 0.0032 | 1   | .   |                             |        |        |        |         |         |   |
| 4390   | N   | N   | . ASP ASP ASP B B 141 141 . | 0.3396 | 0.3447 | 0.3410 | -0.0015 | 0.0018  |   |
| 0.0002 | 1   | .   |                             |        |        |        |         |         |   |
| 4391   | CA  | CA  | . ASP ASP ASP B B 141 141 . | 0.3531 | 0.3491 | 0.3515 | 0.0037  | -0.0038 | - |
| 0.0009 | 1   | .   |                             |        |        |        |         |         |   |
| 4392   | CB  | CB  | . ASP ASP ASP B B 141 141 . | 0.3733 | 0.3823 | 0.3877 | 0.0056  | 0.0056  |   |
| 0.0038 | 1   | .   |                             |        |        |        |         |         |   |









|        |     |     |                             |        |        |        |         |         |   |
|--------|-----|-----|-----------------------------|--------|--------|--------|---------|---------|---|
| 4513   | CB  | CB  | . LEU LEU LEU B B 162 162 . | 0.0770 | 0.0733 | 0.0753 | -0.0070 | -0.0181 | - |
| 0.0034 | 1   | .   |                             |        |        |        |         |         |   |
| 4514   | CG  | CG  | . LEU LEU LEU B B 162 162 . | 0.0699 | 0.0554 | 0.0578 | -0.0264 | 0.0144  |   |
| 0.0114 | 1   | .   |                             |        |        |        |         |         |   |
| 4515   | CD1 | CD1 | . LEU LEU LEU B B 162 162 . | 0.1299 | 0.1082 | 0.0933 | 0.0081  | 0.0254  | - |
| 0.0107 | 1   | .   |                             |        |        |        |         |         |   |
| 4516   | CD2 | CD2 | . LEU LEU LEU B B 162 162 . | 0.0318 | 0.0405 | 0.0382 | 0.0091  | -0.0080 | - |
| 0.0139 | 1   | .   |                             |        |        |        |         |         |   |
| 4517   | C   | C   | . LEU LEU LEU B B 162 162 . | 0.0591 | 0.0876 | 0.0691 | 0.0102  | 0.0027  |   |
| 0.0078 | 1   | .   |                             |        |        |        |         |         |   |
| 4518   | O   | O   | . LEU LEU LEU B B 162 162 . | 0.1125 | 0.1111 | 0.1138 | 0.0075  | 0.0061  |   |
| 0.0034 | 1   | .   |                             |        |        |        |         |         |   |
| 4519   | N   | N   | . ALA ALA ALA B B 163 163 . | 0.0645 | 0.0568 | 0.0889 | 0.0034  | 0.0015  | - |
| 0.0010 | 1   | .   |                             |        |        |        |         |         |   |
| 4520   | CA  | CA  | . ALA ALA ALA B B 163 163 . | 0.0544 | 0.0630 | 0.0686 | 0.0002  | -0.0167 | - |
| 0.0101 | 1   | .   |                             |        |        |        |         |         |   |
| 4521   | CB  | CB  | . ALA ALA ALA B B 163 163 . | 0.0457 | 0.0429 | 0.0696 | -0.0106 | -0.0070 | - |
| 0.0187 | 1   | .   |                             |        |        |        |         |         |   |
| 4522   | C   | C   | . ALA ALA ALA B B 163 163 . | 0.0513 | 0.0553 | 0.0499 | -0.0006 | 0.0077  | - |
| 0.0111 | 1   | .   |                             |        |        |        |         |         |   |
| 4523   | O   | O   | . ALA ALA ALA B B 163 163 . | 0.0377 | 0.0423 | 0.0576 | -0.0076 | -0.0105 | - |
| 0.0105 | 1   | .   |                             |        |        |        |         |         |   |
| 4524   | N   | N   | . MET MET MET B B 164 164 . | 0.0664 | 0.0381 | 0.0475 | -0.0041 | -0.0107 | - |
| 0.0121 | 1   | .   |                             |        |        |        |         |         |   |
| 4525   | CA  | CA  | . MET MET MET B B 164 164 . | 0.0258 | 0.0355 | 0.0262 | -0.0022 | 0.0006  | - |
| 0.0030 | 1   | .   |                             |        |        |        |         |         |   |
| 4526   | CB  | CB  | . MET MET MET B B 164 164 . | 0.0261 | 0.0266 | 0.0254 | 0.0010  | -0.0003 | - |
| 0.0003 | 1   | .   |                             |        |        |        |         |         |   |
| 4527   | CG  | CG  | . MET MET MET B B 164 164 . | 0.0253 | 0.0253 | 0.0253 | 0.0000  | 0.0000  |   |
| 0.0000 | 1   | .   |                             |        |        |        |         |         |   |
| 4528   | SD  | SD  | . MET MET MET B B 164 164 . | 0.0738 | 0.0644 | 0.0560 | 0.0000  | -0.0149 | - |
| 0.0135 | 1   | .   |                             |        |        |        |         |         |   |
| 4529   | CE  | CE  | . MET MET MET B B 164 164 . | 0.0627 | 0.0266 | 0.0465 | -0.0016 | -0.0013 | - |
| 0.0050 | 1   | .   |                             |        |        |        |         |         |   |
| 4530   | C   | C   | . MET MET MET B B 164 164 . | 0.0309 | 0.0289 | 0.0325 | 0.0045  | -0.0064 | - |
| 0.0051 | 1   | .   |                             |        |        |        |         |         |   |
| 4531   | O   | O   | . MET MET MET B B 164 164 . | 0.0575 | 0.0495 | 0.0569 | 0.0204  | -0.0008 | - |
| 0.0006 | 1   | .   |                             |        |        |        |         |         |   |
| 4532   | N   | N   | . GLN GLN GLN B B 165 165 . | 0.0319 | 0.0253 | 0.0269 | -0.0006 | 0.0032  | - |
| 0.0003 | 1   | .   |                             |        |        |        |         |         |   |
| 4533   | CA  | CA  | . GLN GLN GLN B B 165 165 . | 0.0280 | 0.0270 | 0.0255 | 0.0021  | 0.0008  |   |
| 0.0006 | 1   | .   |                             |        |        |        |         |         |   |
| 4534   | CB  | CB  | . GLN GLN GLN B B 165 165 . | 0.0253 | 0.0262 | 0.0253 | -0.0002 | 0.0000  |   |
| 0.0002 | 1   | .   |                             |        |        |        |         |         |   |
| 4535   | CG  | CG  | . GLN GLN GLN B B 165 165 . | 0.0660 | 0.0578 | 0.0549 | -0.0011 | 0.0154  |   |
| 0.0099 | 1   | .   |                             |        |        |        |         |         |   |
| 4536   | CD  | CD  | . GLN GLN GLN B B 165 165 . | 0.0253 | 0.0253 | 0.0253 | 0.0000  | 0.0000  |   |
| 0.0000 | 1   | .   |                             |        |        |        |         |         |   |
| 4537   | OE1 | OE1 | . GLN GLN GLN B B 165 165 . | 0.0443 | 0.0303 | 0.0399 | 0.0094  | -0.0166 | - |
| 0.0083 | 1   | .   |                             |        |        |        |         |         |   |
| 4538   | NE2 | NE2 | . GLN GLN GLN B B 165 165 . | 0.0580 | 0.0450 | 0.0445 | 0.0159  | -0.0031 | - |
| 0.0165 | 1   | .   |                             |        |        |        |         |         |   |
| 4539   | C   | C   | . GLN GLN GLN B B 165 165 . | 0.0405 | 0.0285 | 0.0338 | 0.0067  | -0.0062 | - |
| 0.0040 | 1   | .   |                             |        |        |        |         |         |   |
| 4540   | O   | O   | . GLN GLN GLN B B 165 165 . | 0.0787 | 0.0606 | 0.0333 | 0.0216  | -0.0086 |   |
| 0.0001 | 1   | .   |                             |        |        |        |         |         |   |
| 4541   | N   | N   | . GLU GLU GLU B B 166 166 . | 0.0303 | 0.0312 | 0.0275 | 0.0054  | -0.0033 | - |
| 0.0036 | 1   | .   |                             |        |        |        |         |         |   |
| 4542   | CA  | CA  | . GLU GLU GLU B B 166 166 . | 0.0284 | 0.0268 | 0.0254 | 0.0021  | 0.0006  |   |
| 0.0004 | 1   | .   |                             |        |        |        |         |         |   |







|        |     |     |                   |         |                                        |   |
|--------|-----|-----|-------------------|---------|----------------------------------------|---|
| 4603   | N   | N   | . ALA ALA ALA B B | 174 174 | . 0.0616 0.0515 0.0418 0.0124 0.0110   | - |
| 0.0132 | 1   | .   |                   |         |                                        |   |
| 4604   | CA  | CA  | . ALA ALA ALA B B | 174 174 | . 0.0582 0.0346 0.0494 0.0161 0.0086   |   |
| 0.0044 | 1   | .   |                   |         |                                        |   |
| 4605   | CB  | CB  | . ALA ALA ALA B B | 174 174 | . 0.0746 0.0493 0.0369 0.0187 -0.0108  | - |
| 0.0046 | 1   | .   |                   |         |                                        |   |
| 4606   | C   | C   | . ALA ALA ALA B B | 174 174 | . 0.0871 0.0744 0.0777 0.0070 -0.0055  |   |
| 0.0008 | 1   | .   |                   |         |                                        |   |
| 4607   | O   | O   | . ALA ALA ALA B B | 174 174 | . 0.0878 0.0702 0.0613 0.0049 0.0088   | - |
| 0.0204 | 1   | .   |                   |         |                                        |   |
| 4608   | N   | N   | . GLU GLU GLU B B | 175 175 | . 0.1195 0.0846 0.0884 0.0091 0.0005   |   |
| 0.0110 | 1   | .   |                   |         |                                        |   |
| 4609   | CA  | CA  | . GLU GLU GLU B B | 175 175 | . 0.1164 0.1065 0.1115 0.0055 0.0040   |   |
| 0.0004 | 1   | .   |                   |         |                                        |   |
| 4610   | CB  | CB  | . GLU GLU GLU B B | 175 175 | . 0.1471 0.1262 0.1257 0.0099 0.0042   |   |
| 0.0149 | 1   | .   |                   |         |                                        |   |
| 4611   | CG  | CG  | . GLU GLU GLU B B | 175 175 | . 0.2397 0.2586 0.2860 0.0060 0.0199   | - |
| 0.0011 | 1   | .   |                   |         |                                        |   |
| 4612   | CD  | CD  | . GLU GLU GLU B B | 175 175 | . 0.4264 0.3735 0.3904 0.0158 0.0034   |   |
| 0.0338 | 1   | .   |                   |         |                                        |   |
| 4613   | OE1 | OE1 | . GLU GLU GLU B B | 175 175 | . 0.4667 0.4589 0.4655 -0.0050 0.0216  |   |
| 0.0173 | 1   | .   |                   |         |                                        |   |
| 4614   | OE2 | OE2 | . GLU GLU GLU B B | 175 175 | . 0.4508 0.4245 0.4304 -0.0084 0.0015  |   |
| 0.0419 | 1   | .   |                   |         |                                        |   |
| 4615   | C   | C   | . GLU GLU GLU B B | 175 175 | . 0.0989 0.0896 0.0893 0.0081 0.0034   |   |
| 0.0030 | 1   | .   |                   |         |                                        |   |
| 4616   | O   | O   | . GLU GLU GLU B B | 175 175 | . 0.1304 0.0916 0.0853 0.0085 0.0081   | - |
| 0.0137 | 1   | .   |                   |         |                                        |   |
| 4617   | N   | N   | . SER SER SER B B | 176 176 | . 0.0810 0.0746 0.0685 0.0073 -0.0013  |   |
| 0.0003 | 1   | .   |                   |         |                                        |   |
| 4618   | CA  | CA  | . SER SER SER B B | 176 176 | . 0.0555 0.0472 0.0422 -0.0069 0.0002  |   |
| 0.0059 | 1   | .   |                   |         |                                        |   |
| 4619   | CB  | CB  | . SER SER SER B B | 176 176 | . 0.0840 0.0621 0.0794 0.0050 -0.0016  |   |
| 0.0113 | 1   | .   |                   |         |                                        |   |
| 4620   | OG  | OG  | . SER SER SER B B | 176 176 | . 0.0508 0.0437 0.0372 -0.0182 -0.0087 | - |
| 0.0006 | 1   | .   |                   |         |                                        |   |
| 4621   | C   | C   | . SER SER SER B B | 176 176 | . 0.0253 0.0253 0.0253 0.0000 0.0000   |   |
| 0.0000 | 1   | .   |                   |         |                                        |   |
| 4622   | O   | O   | . SER SER SER B B | 176 176 | . 0.0253 0.0253 0.0253 0.0000 0.0000   |   |
| 0.0000 | 1   | .   |                   |         |                                        |   |
| 4623   | N   | N   | . PHE PHE PHE B B | 177 177 | . 0.0253 0.0253 0.0253 0.0000 0.0000   |   |
| 0.0000 | 1   | .   |                   |         |                                        |   |
| 4624   | CA  | CA  | . PHE PHE PHE B B | 177 177 | . 0.0261 0.0253 0.0254 0.0001 0.0002   |   |
| 0.0000 | 1   | .   |                   |         |                                        |   |
| 4625   | CB  | CB  | . PHE PHE PHE B B | 177 177 | . 0.0267 0.0259 0.0350 -0.0006 -0.0026 |   |
| 0.0024 | 1   | .   |                   |         |                                        |   |
| 4626   | CG  | CG  | . PHE PHE PHE B B | 177 177 | . 0.0253 0.0253 0.0253 0.0000 0.0000   |   |
| 0.0000 | 1   | .   |                   |         |                                        |   |
| 4627   | CD1 | CD1 | . PHE PHE PHE B B | 177 177 | . 0.0333 0.0269 0.0273 0.0036 0.0040   |   |
| 0.0018 | 1   | .   |                   |         |                                        |   |
| 4628   | CE1 | CE1 | . PHE PHE PHE B B | 177 177 | . 0.0376 0.0357 0.0253 -0.0113 -0.0001 |   |
| 0.0001 | 1   | .   |                   |         |                                        |   |
| 4629   | CZ  | CZ  | . PHE PHE PHE B B | 177 177 | . 0.0425 0.0370 0.0333 -0.0012 -0.0085 |   |
| 0.0072 | 1   | .   |                   |         |                                        |   |
| 4630   | CE2 | CE2 | . PHE PHE PHE B B | 177 177 | . 0.0397 0.0253 0.0477 -0.0003 -0.0179 |   |
| 0.0004 | 1   | .   |                   |         |                                        |   |
| 4631   | CD2 | CD2 | . PHE PHE PHE B B | 177 177 | . 0.0253 0.0253 0.0253 0.0000 0.0000   |   |
| 0.0000 | 1   | .   |                   |         |                                        |   |
| 4632   | C   | C   | . PHE PHE PHE B B | 177 177 | . 0.0253 0.0253 0.0253 0.0000 0.0000   |   |
| 0.0000 | 1   | .   |                   |         |                                        |   |





|        |     |     |                             |        |        |        |         |         |   |
|--------|-----|-----|-----------------------------|--------|--------|--------|---------|---------|---|
| 4693   | O   | O   | . ALA ALA ALA B B 185 185 . | 0.0253 | 0.0253 | 0.0253 | 0.0000  | 0.0000  |   |
| 0.0000 | 1   | .   |                             |        |        |        |         |         |   |
| 4694   | N   | N   | . GLU GLU GLU B B 186 186 . | 0.0253 | 0.0253 | 0.0253 | 0.0000  | 0.0000  |   |
| 0.0000 | 1   | .   |                             |        |        |        |         |         |   |
| 4695   | CA  | CA  | . GLU GLU GLU B B 186 186 . | 0.0253 | 0.0253 | 0.0253 | 0.0000  | 0.0000  |   |
| 0.0000 | 1   | .   |                             |        |        |        |         |         |   |
| 4696   | CB  | CB  | . GLU GLU GLU B B 186 186 . | 0.0253 | 0.0253 | 0.0253 | 0.0000  | 0.0000  |   |
| 0.0000 | 1   | .   |                             |        |        |        |         |         |   |
| 4697   | CG  | CG  | . GLU GLU GLU B B 186 186 . | 0.0360 | 0.0258 | 0.0313 | 0.0022  | 0.0080  |   |
| 0.0016 | 1   | .   |                             |        |        |        |         |         |   |
| 4698   | CD  | CD  | . GLU GLU GLU B B 186 186 . | 0.0803 | 0.0595 | 0.0645 | -0.0101 | 0.0314  | - |
| 0.0255 | 1   | .   |                             |        |        |        |         |         |   |
| 4699   | OE1 | OE1 | . GLU GLU GLU B B 186 186 . | 0.1108 | 0.0721 | 0.0587 | 0.0115  | 0.0233  |   |
| 0.0381 | 1   | .   |                             |        |        |        |         |         |   |
| 4700   | OE2 | OE2 | . GLU GLU GLU B B 186 186 . | 0.0832 | 0.0376 | 0.0578 | 0.0042  | 0.0119  | - |
| 0.0009 | 1   | .   |                             |        |        |        |         |         |   |
| 4701   | C   | C   | . GLU GLU GLU B B 186 186 . | 0.0253 | 0.0253 | 0.0253 | 0.0000  | 0.0000  |   |
| 0.0000 | 1   | .   |                             |        |        |        |         |         |   |
| 4702   | O   | O   | . GLU GLU GLU B B 186 186 . | 0.0253 | 0.0253 | 0.0253 | 0.0000  | 0.0000  |   |
| 0.0000 | 1   | .   |                             |        |        |        |         |         |   |
| 4703   | N   | N   | . VAL VAL VAL B B 187 187 . | 0.0253 | 0.0253 | 0.0253 | 0.0000  | 0.0000  |   |
| 0.0000 | 1   | .   |                             |        |        |        |         |         |   |
| 4704   | CA  | CA  | . VAL VAL VAL B B 187 187 . | 0.0253 | 0.0253 | 0.0253 | 0.0000  | 0.0000  |   |
| 0.0000 | 1   | .   |                             |        |        |        |         |         |   |
| 4705   | CB  | CB  | . VAL VAL VAL B B 187 187 . | 0.0253 | 0.0253 | 0.0253 | 0.0000  | 0.0000  |   |
| 0.0000 | 1   | .   |                             |        |        |        |         |         |   |
| 4706   | CG1 | CG1 | . VAL VAL VAL B B 187 187 . | 0.0263 | 0.0260 | 0.0256 | -0.0008 | -0.0005 |   |
| 0.0004 | 1   | .   |                             |        |        |        |         |         |   |
| 4707   | CG2 | CG2 | . VAL VAL VAL B B 187 187 . | 0.0253 | 0.0253 | 0.0253 | 0.0000  | 0.0000  |   |
| 0.0000 | 1   | .   |                             |        |        |        |         |         |   |
| 4708   | C   | C   | . VAL VAL VAL B B 187 187 . | 0.0253 | 0.0253 | 0.0253 | 0.0000  | 0.0000  |   |
| 0.0000 | 1   | .   |                             |        |        |        |         |         |   |
| 4709   | O   | O   | . VAL VAL VAL B B 187 187 . | 0.0253 | 0.0253 | 0.0253 | 0.0000  | 0.0000  |   |
| 0.0000 | 1   | .   |                             |        |        |        |         |         |   |
| 4710   | N   | N   | . TYR TYR TYR B B 188 188 . | 0.0253 | 0.0253 | 0.0253 | 0.0000  | 0.0000  |   |
| 0.0000 | 1   | .   |                             |        |        |        |         |         |   |
| 4711   | CA  | CA  | . TYR TYR TYR B B 188 188 . | 0.0253 | 0.0253 | 0.0253 | 0.0000  | 0.0000  |   |
| 0.0000 | 1   | .   |                             |        |        |        |         |         |   |
| 4712   | CB  | CB  | . TYR TYR TYR B B 188 188 . | 0.0253 | 0.0253 | 0.0253 | 0.0000  | 0.0000  |   |
| 0.0000 | 1   | .   |                             |        |        |        |         |         |   |
| 4713   | CG  | CG  | . TYR TYR TYR B B 188 188 . | 0.0253 | 0.0253 | 0.0253 | 0.0000  | 0.0000  |   |
| 0.0000 | 1   | .   |                             |        |        |        |         |         |   |
| 4714   | CD1 | CD1 | . TYR TYR TYR B B 188 188 . | 0.0267 | 0.0257 | 0.0270 | -0.0007 | 0.0015  | - |
| 0.0008 | 1   | .   |                             |        |        |        |         |         |   |
| 4715   | CE1 | CE1 | . TYR TYR TYR B B 188 188 . | 0.0253 | 0.0253 | 0.0253 | 0.0000  | 0.0000  |   |
| 0.0000 | 1   | .   |                             |        |        |        |         |         |   |
| 4716   | CZ  | CZ  | . TYR TYR TYR B B 188 188 . | 0.0253 | 0.0253 | 0.0253 | 0.0000  | 0.0000  |   |
| 0.0000 | 1   | .   |                             |        |        |        |         |         |   |
| 4717   | OH  | OH  | . TYR TYR TYR B B 188 188 . | 0.0253 | 0.0253 | 0.0253 | 0.0000  | 0.0000  |   |
| 0.0000 | 1   | .   |                             |        |        |        |         |         |   |
| 4718   | CE2 | CE2 | . TYR TYR TYR B B 188 188 . | 0.0253 | 0.0253 | 0.0253 | 0.0000  | 0.0000  |   |
| 0.0000 | 1   | .   |                             |        |        |        |         |         |   |
| 4719   | CD2 | CD2 | . TYR TYR TYR B B 188 188 . | 0.0253 | 0.0253 | 0.0253 | 0.0000  | 0.0000  |   |
| 0.0000 | 1   | .   |                             |        |        |        |         |         |   |
| 4720   | C   | C   | . TYR TYR TYR B B 188 188 . | 0.0253 | 0.0253 | 0.0253 | 0.0000  | 0.0000  |   |
| 0.0000 | 1   | .   |                             |        |        |        |         |         |   |
| 4721   | O   | O   | . TYR TYR TYR B B 188 188 . | 0.0253 | 0.0253 | 0.0253 | 0.0000  | 0.0000  |   |
| 0.0000 | 1   | .   |                             |        |        |        |         |         |   |
| 4722   | N   | N   | . HIS HIS HIS B B 189 189 . | 0.0253 | 0.0253 | 0.0253 | 0.0000  | 0.0000  |   |
| 0.0000 | 1   | .   |                             |        |        |        |         |         |   |

















|        |     |     |                             |        |        |        |         |         |   |
|--------|-----|-----|-----------------------------|--------|--------|--------|---------|---------|---|
| 4933   | CD1 | CD1 | . LEU LEU LEU B B 217 217 . | 0.2027 | 0.1781 | 0.1542 | -0.0120 | -0.0434 | - |
| 0.0453 | 1   | .   |                             |        |        |        |         |         |   |
| 4934   | CD2 | CD2 | . LEU LEU LEU B B 217 217 . | 0.2562 | 0.1888 | 0.1523 | -0.0262 | -0.0240 | - |
| 0.0302 | 1   | .   |                             |        |        |        |         |         |   |
| 4935   | C   | C   | . LEU LEU LEU B B 217 217 . | 0.1542 | 0.1641 | 0.1461 | -0.0028 | -0.0076 | - |
| 0.0060 | 1   | .   |                             |        |        |        |         |         |   |
| 4936   | O   | O   | . LEU LEU LEU B B 217 217 . | 0.1591 | 0.1574 | 0.1744 | 0.0122  | -0.0310 | - |
| 0.0238 | 1   | .   |                             |        |        |        |         |         |   |
| 4937   | N   | N   | . GLU GLU GLU B B 218 218 . | 0.1336 | 0.1359 | 0.1492 | 0.0109  | -0.0158 | - |
| 0.0105 | 1   | .   |                             |        |        |        |         |         |   |
| 4938   | CA  | CA  | . GLU GLU GLU B B 218 218 . | 0.1335 | 0.1298 | 0.1219 | -0.0008 | -0.0020 | - |
| 0.0019 | 1   | .   |                             |        |        |        |         |         |   |
| 4939   | CB  | CB  | . GLU GLU GLU B B 218 218 . | 0.1573 | 0.1512 | 0.1765 | 0.0109  | -0.0129 | - |
| 0.0037 | 1   | .   |                             |        |        |        |         |         |   |
| 4940   | CG  | CG  | . GLU GLU GLU B B 218 218 . | 0.1970 | 0.1885 | 0.2096 | -0.0158 | -0.0041 | - |
| 0.0022 | 1   | .   |                             |        |        |        |         |         |   |
| 4941   | CD  | CD  | . GLU GLU GLU B B 218 218 . | 0.3371 | 0.3018 | 0.3079 | -0.0059 | -0.0307 | - |
| 0.0452 | 1   | .   |                             |        |        |        |         |         |   |
| 4942   | OE1 | OE1 | . GLU GLU GLU B B 218 218 . | 0.3929 | 0.3116 | 0.3499 | -0.0146 | -0.0595 | - |
| 0.0603 | 1   | .   |                             |        |        |        |         |         |   |
| 4943   | OE2 | OE2 | . GLU GLU GLU B B 218 218 . | 0.4052 | 0.3690 | 0.3603 | -0.0289 | -0.0404 | - |
| 0.0480 | 1   | .   |                             |        |        |        |         |         |   |
| 4944   | C   | C   | . GLU GLU GLU B B 218 218 . | 0.1180 | 0.1020 | 0.1077 | 0.0059  | -0.0068 | - |
| 0.0061 | 1   | .   |                             |        |        |        |         |         |   |
| 4945   | O   | O   | . GLU GLU GLU B B 218 218 . | 0.1055 | 0.0605 | 0.0829 | 0.0143  | 0.0063  | - |
| 0.0258 | 1   | .   |                             |        |        |        |         |         |   |
| 4946   | N   | N   | . ASN ASN ASN B B 219 219 . | 0.0751 | 0.0553 | 0.0872 | -0.0135 | -0.0132 | - |
| 0.0134 | 1   | .   |                             |        |        |        |         |         |   |
| 4947   | CA  | CA  | . ASN ASN ASN B B 219 219 . | 0.0582 | 0.0562 | 0.0569 | 0.0066  | -0.0072 | - |
| 0.0015 | 1   | .   |                             |        |        |        |         |         |   |
| 4948   | CB  | CB  | . ASN ASN ASN B B 219 219 . | 0.0763 | 0.0616 | 0.0686 | 0.0098  | -0.0107 | - |
| 0.0213 | 1   | .   |                             |        |        |        |         |         |   |
| 4949   | CG  | CG  | . ASN ASN ASN B B 219 219 . | 0.0460 | 0.0594 | 0.0586 | 0.0033  | -0.0028 | - |
| 0.0153 | 1   | .   |                             |        |        |        |         |         |   |
| 4950   | OD1 | OD1 | . ASN ASN ASN B B 219 219 . | 0.0653 | 0.0407 | 0.0614 | 0.0049  | -0.0166 | - |
| 0.0144 | 1   | .   |                             |        |        |        |         |         |   |
| 4951   | ND2 | ND2 | . ASN ASN ASN B B 219 219 . | 0.1307 | 0.1090 | 0.1226 | 0.0247  | -0.0185 | - |
| 0.0166 | 1   | .   |                             |        |        |        |         |         |   |
| 4952   | C   | C   | . ASN ASN ASN B B 219 219 . | 0.0468 | 0.0506 | 0.0531 | -0.0032 | -0.0049 | - |
| 0.0017 | 1   | .   |                             |        |        |        |         |         |   |
| 4953   | O   | O   | . ASN ASN ASN B B 219 219 . | 0.0642 | 0.0480 | 0.0596 | 0.0119  | -0.0068 | - |
| 0.0051 | 1   | .   |                             |        |        |        |         |         |   |
| 4954   | N   | N   | . SER SER SER B B 220 220 . | 0.0573 | 0.0524 | 0.0467 | 0.0086  | -0.0144 | - |
| 0.0061 | 1   | .   |                             |        |        |        |         |         |   |
| 4955   | CA  | CA  | . SER SER SER B B 220 220 . | 0.0747 | 0.0796 | 0.0761 | 0.0111  | -0.0105 | - |
| 0.0033 | 1   | .   |                             |        |        |        |         |         |   |
| 4956   | CB  | CB  | . SER SER SER B B 220 220 . | 0.0899 | 0.0811 | 0.0784 | 0.0123  | -0.0063 | - |
| 0.0064 | 1   | .   |                             |        |        |        |         |         |   |
| 4957   | OG  | OG  | . SER SER SER B B 220 220 . | 0.1326 | 0.1135 | 0.1358 | -0.0085 | -0.0068 | - |
| 0.0133 | 1   | .   |                             |        |        |        |         |         |   |
| 4958   | C   | C   | . SER SER SER B B 220 220 . | 0.0771 | 0.0658 | 0.0649 | 0.0034  | -0.0025 | - |
| 0.0034 | 1   | .   |                             |        |        |        |         |         |   |
| 4959   | O   | O   | . SER SER SER B B 220 220 . | 0.0834 | 0.0726 | 0.0440 | 0.0103  | -0.0209 | - |
| 0.0016 | 1   | .   |                             |        |        |        |         |         |   |
| 4960   | N   | N   | . GLU GLU GLU B B 221 221 . | 0.0756 | 0.0711 | 0.0817 | 0.0132  | -0.0101 | - |
| 0.0083 | 1   | .   |                             |        |        |        |         |         |   |
| 4961   | CA  | CA  | . GLU GLU GLU B B 221 221 . | 0.0811 | 0.0812 | 0.0751 | 0.0021  | 0.0018  | - |
| 0.0088 | 1   | .   |                             |        |        |        |         |         |   |
| 4962   | CB  | CB  | . GLU GLU GLU B B 221 221 . | 0.1303 | 0.0967 | 0.0880 | 0.0042  | 0.0013  | - |
| 0.0017 | 1   | .   |                             |        |        |        |         |         |   |







|        |     |     |                             |        |        |        |         |         |   |
|--------|-----|-----|-----------------------------|--------|--------|--------|---------|---------|---|
| 5023   | O   | O   | . GLU GLU GLU B B 228 228 . | 0.1209 | 0.1137 | 0.1087 | 0.0163  | 0.0056  | - |
| 0.0104 | 1   | .   |                             |        |        |        |         |         |   |
| 5024   | N   | N   | . ALA ALA ALA B B 229 229 . | 0.0708 | 0.0787 | 0.0691 | 0.0053  | 0.0056  |   |
| 0.0150 | 1   | .   |                             |        |        |        |         |         |   |
| 5025   | CA  | CA  | . ALA ALA ALA B B 229 229 . | 0.0596 | 0.0676 | 0.0620 | 0.0080  | 0.0074  |   |
| 0.0133 | 1   | .   |                             |        |        |        |         |         |   |
| 5026   | CB  | CB  | . ALA ALA ALA B B 229 229 . | 0.0654 | 0.0563 | 0.0493 | 0.0241  | 0.0029  |   |
| 0.0083 | 1   | .   |                             |        |        |        |         |         |   |
| 5027   | C   | C   | . ALA ALA ALA B B 229 229 . | 0.0547 | 0.0471 | 0.0313 | 0.0064  | 0.0105  |   |
| 0.0090 | 1   | .   |                             |        |        |        |         |         |   |
| 5028   | O   | O   | . ALA ALA ALA B B 229 229 . | 0.0691 | 0.0529 | 0.0491 | 0.0085  | 0.0156  |   |
| 0.0110 | 1   | .   |                             |        |        |        |         |         |   |
| 5029   | N   | N   | . ILE ILE ILE B B 230 230 . | 0.0293 | 0.0472 | 0.0357 | 0.0068  | 0.0060  |   |
| 0.0066 | 1   | .   |                             |        |        |        |         |         |   |
| 5030   | CA  | CA  | . ILE ILE ILE B B 230 230 . | 0.0484 | 0.0366 | 0.0415 | 0.0013  | 0.0033  |   |
| 0.0041 | 1   | .   |                             |        |        |        |         |         |   |
| 5031   | CB  | CB  | . ILE ILE ILE B B 230 230 . | 0.0379 | 0.0455 | 0.0325 | 0.0046  | -0.0002 | - |
| 0.0115 | 1   | .   |                             |        |        |        |         |         |   |
| 5032   | CG1 | CG1 | . ILE ILE ILE B B 230 230 . | 0.0368 | 0.0280 | 0.0385 | 0.0055  | -0.0046 | - |
| 0.0020 | 1   | .   |                             |        |        |        |         |         |   |
| 5033   | CD1 | CD1 | . ILE ILE ILE B B 230 230 . | 0.0870 | 0.0807 | 0.0351 | 0.0276  | -0.0069 | - |
| 0.0227 | 1   | .   |                             |        |        |        |         |         |   |
| 5034   | CG2 | CG2 | . ILE ILE ILE B B 230 230 . | 0.0505 | 0.0356 | 0.0405 | -0.0054 | 0.0152  | - |
| 0.0106 | 1   | .   |                             |        |        |        |         |         |   |
| 5035   | C   | C   | . ILE ILE ILE B B 230 230 . | 0.0771 | 0.0718 | 0.0768 | -0.0018 | 0.0116  |   |
| 0.0012 | 1   | .   |                             |        |        |        |         |         |   |
| 5036   | O   | O   | . ILE ILE ILE B B 230 230 . | 0.0863 | 0.0668 | 0.0736 | 0.0124  | 0.0161  |   |
| 0.0027 | 1   | .   |                             |        |        |        |         |         |   |
| 5037   | N   | N   | . ASP ASP ASP B B 231 231 . | 0.0991 | 0.0934 | 0.0985 | 0.0080  | 0.0078  |   |
| 0.0009 | 1   | .   |                             |        |        |        |         |         |   |
| 5038   | CA  | CA  | . ASP ASP ASP B B 231 231 . | 0.1290 | 0.1174 | 0.1271 | 0.0080  | 0.0136  |   |
| 0.0009 | 1   | .   |                             |        |        |        |         |         |   |
| 5039   | CB  | CB  | . ASP ASP ASP B B 231 231 . | 0.1656 | 0.1337 | 0.1514 | 0.0012  | 0.0199  |   |
| 0.0188 | 1   | .   |                             |        |        |        |         |         |   |
| 5040   | CG  | CG  | . ASP ASP ASP B B 231 231 . | 0.2445 | 0.2160 | 0.2325 | 0.0151  | 0.0279  | - |
| 0.0151 | 1   | .   |                             |        |        |        |         |         |   |
| 5041   | OD1 | OD1 | . ASP ASP ASP B B 231 231 . | 0.3071 | 0.3096 | 0.2841 | 0.0279  | 0.0155  | - |
| 0.0437 | 1   | .   |                             |        |        |        |         |         |   |
| 5042   | OD2 | OD2 | . ASP ASP ASP B B 231 231 . | 0.3813 | 0.3875 | 0.3724 | -0.0096 | -0.0226 | - |
| 0.0314 | 1   | .   |                             |        |        |        |         |         |   |
| 5043   | C   | C   | . ASP ASP ASP B B 231 231 . | 0.1073 | 0.0971 | 0.1123 | 0.0031  | 0.0011  |   |
| 0.0080 | 1   | .   |                             |        |        |        |         |         |   |
| 5044   | O   | O   | . ASP ASP ASP B B 231 231 . | 0.1342 | 0.1042 | 0.1136 | 0.0112  | -0.0011 | - |
| 0.0078 | 1   | .   |                             |        |        |        |         |         |   |
| 5045   | N   | N   | . LYS LYS LYS B B 232 232 . | 0.0884 | 0.0665 | 0.0947 | 0.0080  | 0.0118  |   |
| 0.0104 | 1   | .   |                             |        |        |        |         |         |   |
| 5046   | CA  | CA  | . LYS LYS LYS B B 232 232 . | 0.1055 | 0.1078 | 0.0985 | 0.0053  | 0.0017  |   |
| 0.0040 | 1   | .   |                             |        |        |        |         |         |   |
| 5047   | CB  | CB  | . LYS LYS LYS B B 232 232 . | 0.1393 | 0.1312 | 0.1262 | -0.0010 | 0.0006  | - |
| 0.0036 | 1   | .   |                             |        |        |        |         |         |   |
| 5048   | CG  | CG  | . LYS LYS LYS B B 232 232 . | 0.1907 | 0.2188 | 0.2007 | 0.0236  | 0.0220  |   |
| 0.0162 | 1   | .   |                             |        |        |        |         |         |   |
| 5049   | CD  | CD  | . LYS LYS LYS B B 232 232 . | 0.2885 | 0.2861 | 0.2440 | -0.0112 | 0.0178  |   |
| 0.0030 | 1   | .   |                             |        |        |        |         |         |   |
| 5050   | CE  | CE  | . LYS LYS LYS B B 232 232 . | 0.3533 | 0.3644 | 0.3687 | -0.0038 | -0.0086 | - |
| 0.0182 | 1   | .   |                             |        |        |        |         |         |   |
| 5051   | NZ  | NZ  | . LYS LYS LYS B B 232 232 . | 0.4535 | 0.4291 | 0.3917 | -0.0379 | 0.0058  | - |
| 0.0058 | 1   | .   |                             |        |        |        |         |         |   |
| 5052   | C   | C   | . LYS LYS LYS B B 232 232 . | 0.0982 | 0.0931 | 0.1080 | 0.0068  | -0.0021 |   |
| 0.0035 | 1   | .   |                             |        |        |        |         |         |   |











|        |     |     |                             |        |        |        |         |         |   |
|--------|-----|-----|-----------------------------|--------|--------|--------|---------|---------|---|
| 5203   | NE  | NE  | . ARG ARG ARG B B 252 252 . | 0.2142 | 0.1490 | 0.1716 | 0.0074  | 0.0024  | - |
| 0.0069 | 1   | .   |                             |        |        |        |         |         |   |
| 5204   | CZ  | CZ  | . ARG ARG ARG B B 252 252 . | 0.1853 | 0.1767 | 0.1554 | -0.0097 | -0.0225 | - |
| 0.0006 | 1   | .   |                             |        |        |        |         |         |   |
| 5205   | NH1 | NH1 | . ARG ARG ARG B B 252 252 . | 0.1199 | 0.1012 | 0.1227 | 0.0222  | -0.0039 | - |
| 0.0220 | 1   | .   |                             |        |        |        |         |         |   |
| 5206   | NH2 | NH2 | . ARG ARG ARG B B 252 252 . | 0.1428 | 0.1316 | 0.1439 | 0.0150  | -0.0268 | - |
| 0.0088 | 1   | .   |                             |        |        |        |         |         |   |
| 5207   | C   | C   | . ARG ARG ARG B B 252 252 . | 0.0935 | 0.0616 | 0.0809 | -0.0012 | 0.0001  | - |
| 0.0062 | 1   | .   |                             |        |        |        |         |         |   |
| 5208   | O   | O   | . ARG ARG ARG B B 252 252 . | 0.0837 | 0.0816 | 0.1090 | -0.0189 | -0.0086 | - |
| 0.0078 | 1   | .   |                             |        |        |        |         |         |   |
| 5209   | N   | N   | . ASP ASP ASP B B 253 253 . | 0.1101 | 0.0982 | 0.1042 | -0.0023 | -0.0130 | - |
| 0.0057 | 1   | .   |                             |        |        |        |         |         |   |
| 5210   | CA  | CA  | . ASP ASP ASP B B 253 253 . | 0.1116 | 0.0981 | 0.1114 | -0.0093 | -0.0089 | - |
| 0.0176 | 1   | .   |                             |        |        |        |         |         |   |
| 5211   | CB  | CB  | . ASP ASP ASP B B 253 253 . | 0.1448 | 0.1444 | 0.1523 | 0.0010  | -0.0027 | - |
| 0.0071 | 1   | .   |                             |        |        |        |         |         |   |
| 5212   | CG  | CG  | . ASP ASP ASP B B 253 253 . | 0.2354 | 0.2176 | 0.1796 | -0.0070 | -0.0121 | - |
| 0.0037 | 1   | .   |                             |        |        |        |         |         |   |
| 5213   | OD1 | OD1 | . ASP ASP ASP B B 253 253 . | 0.2652 | 0.2147 | 0.2832 | 0.0083  | -0.0121 | - |
| 0.0089 | 1   | .   |                             |        |        |        |         |         |   |
| 5214   | OD2 | OD2 | . ASP ASP ASP B B 253 253 . | 0.2679 | 0.2292 | 0.2441 | 0.0204  | -0.0048 | - |
| 0.0038 | 1   | .   |                             |        |        |        |         |         |   |
| 5215   | C   | C   | . ASP ASP ASP B B 253 253 . | 0.0995 | 0.0749 | 0.1143 | 0.0035  | 0.0046  | - |
| 0.0026 | 1   | .   |                             |        |        |        |         |         |   |
| 5216   | O   | O   | . ASP ASP ASP B B 253 253 . | 0.0965 | 0.0754 | 0.1031 | -0.0060 | 0.0176  | - |
| 0.0043 | 1   | .   |                             |        |        |        |         |         |   |
| 5217   | N   | N   | . GLY GLY GLY B B 254 254 . | 0.0875 | 0.0650 | 0.0888 | 0.0049  | -0.0072 | - |
| 0.0026 | 1   | .   |                             |        |        |        |         |         |   |
| 5218   | CA  | CA  | . GLY GLY GLY B B 254 254 . | 0.0440 | 0.0408 | 0.0640 | 0.0119  | -0.0002 | - |
| 0.0038 | 1   | .   |                             |        |        |        |         |         |   |
| 5219   | C   | C   | . GLY GLY GLY B B 254 254 . | 0.0645 | 0.0527 | 0.0601 | 0.0075  | 0.0031  | - |
| 0.0090 | 1   | .   |                             |        |        |        |         |         |   |
| 5220   | O   | O   | . GLY GLY GLY B B 254 254 . | 0.0771 | 0.0454 | 0.0488 | 0.0064  | -0.0068 | - |
| 0.0149 | 1   | .   |                             |        |        |        |         |         |   |
| 5221   | N   | N   | . LYS LYS LYS B B 255 255 . | 0.0533 | 0.0367 | 0.0469 | 0.0133  | -0.0048 | - |
| 0.0125 | 1   | .   |                             |        |        |        |         |         |   |
| 5222   | CA  | CA  | . LYS LYS LYS B B 255 255 . | 0.0387 | 0.0435 | 0.0517 | 0.0058  | 0.0055  | - |
| 0.0011 | 1   | .   |                             |        |        |        |         |         |   |
| 5223   | CB  | CB  | . LYS LYS LYS B B 255 255 . | 0.0527 | 0.0586 | 0.0546 | 0.0041  | 0.0088  | - |
| 0.0031 | 1   | .   |                             |        |        |        |         |         |   |
| 5224   | CG  | CG  | . LYS LYS LYS B B 255 255 . | 0.0564 | 0.0509 | 0.0349 | -0.0065 | -0.0054 | - |
| 0.0113 | 1   | .   |                             |        |        |        |         |         |   |
| 5225   | CD  | CD  | . LYS LYS LYS B B 255 255 . | 0.1139 | 0.1680 | 0.1458 | -0.0364 | -0.0220 | - |
| 0.0239 | 1   | .   |                             |        |        |        |         |         |   |
| 5226   | CE  | CE  | . LYS LYS LYS B B 255 255 . | 0.1916 | 0.1794 | 0.1683 | -0.0342 | -0.0306 | - |
| 0.0311 | 1   | .   |                             |        |        |        |         |         |   |
| 5227   | NZ  | NZ  | . LYS LYS LYS B B 255 255 . | 0.1946 | 0.2248 | 0.2959 | -0.0363 | 0.0226  | - |
| 0.0257 | 1   | .   |                             |        |        |        |         |         |   |
| 5228   | C   | C   | . LYS LYS LYS B B 255 255 . | 0.0444 | 0.0419 | 0.0541 | 0.0024  | 0.0021  | - |
| 0.0070 | 1   | .   |                             |        |        |        |         |         |   |
| 5229   | O   | O   | . LYS LYS LYS B B 255 255 . | 0.0506 | 0.0258 | 0.0509 | 0.0021  | 0.0027  | - |
| 0.0029 | 1   | .   |                             |        |        |        |         |         |   |
| 5230   | N   | N   | . TYR TYR TYR B B 256 256 . | 0.0361 | 0.0261 | 0.0596 | 0.0016  | 0.0042  | - |
| 0.0036 | 1   | .   |                             |        |        |        |         |         |   |
| 5231   | CA  | CA  | . TYR TYR TYR B B 256 256 . | 0.0259 | 0.0282 | 0.0333 | 0.0002  | -0.0008 | - |
| 0.0047 | 1   | .   |                             |        |        |        |         |         |   |
| 5232   | CB  | CB  | . TYR TYR TYR B B 256 256 . | 0.0261 | 0.0299 | 0.0326 | 0.0019  | -0.0024 | - |
| 0.0058 | 1   | .   |                             |        |        |        |         |         |   |





|        |     |     |                             |        |        |        |         |         |   |
|--------|-----|-----|-----------------------------|--------|--------|--------|---------|---------|---|
| 5263   | OD2 | OD2 | . ASP ASP ASP B B 259 259 . | 0.1912 | 0.2099 | 0.2242 | 0.0063  | 0.0339  | - |
| 0.0296 | 1   | .   |                             |        |        |        |         |         |   |
| 5264   | C   | C   | . ASP ASP ASP B B 259 259 . | 0.1572 | 0.1644 | 0.1662 | -0.0021 | -0.0051 | - |
| 0.0142 | 1   | .   |                             |        |        |        |         |         |   |
| 5265   | O   | O   | . ASP ASP ASP B B 259 259 . | 0.1611 | 0.1524 | 0.1409 | 0.0124  | -0.0217 | - |
| 0.0005 | 1   | .   |                             |        |        |        |         |         |   |
| 5266   | N   | N   | . PHE PHE PHE B B 260 260 . | 0.1612 | 0.1649 | 0.1663 | 0.0079  | 0.0045  | - |
| 0.0024 | 1   | .   |                             |        |        |        |         |         |   |
| 5267   | CA  | CA  | . PHE PHE PHE B B 260 260 . | 0.1669 | 0.1507 | 0.1616 | 0.0110  | 0.0036  | - |
| 0.0030 | 1   | .   |                             |        |        |        |         |         |   |
| 5268   | CB  | CB  | . PHE PHE PHE B B 260 260 . | 0.1499 | 0.1323 | 0.1388 | -0.0115 | -0.0036 | - |
| 0.0017 | 1   | .   |                             |        |        |        |         |         |   |
| 5269   | CG  | CG  | . PHE PHE PHE B B 260 260 . | 0.1491 | 0.1362 | 0.1192 | 0.0092  | -0.0099 | - |
| 0.0044 | 1   | .   |                             |        |        |        |         |         |   |
| 5270   | CD1 | CD1 | . PHE PHE PHE B B 260 260 . | 0.1043 | 0.1383 | 0.1563 | -0.0127 | -0.0206 |   |
| 0.0023 | 1   | .   |                             |        |        |        |         |         |   |
| 5271   | CE1 | CE1 | . PHE PHE PHE B B 260 260 . | 0.1959 | 0.1635 | 0.1102 | 0.0106  | 0.0315  | - |
| 0.0119 | 1   | .   |                             |        |        |        |         |         |   |
| 5272   | CZ  | CZ  | . PHE PHE PHE B B 260 260 . | 0.1439 | 0.0869 | 0.1586 | -0.0013 | -0.0112 | - |
| 0.0087 | 1   | .   |                             |        |        |        |         |         |   |
| 5273   | CE2 | CE2 | . PHE PHE PHE B B 260 260 . | 0.1437 | 0.1343 | 0.1403 | -0.0070 | -0.0150 | - |
| 0.0124 | 1   | .   |                             |        |        |        |         |         |   |
| 5274   | CD2 | CD2 | . PHE PHE PHE B B 260 260 . | 0.1379 | 0.1249 | 0.1576 | -0.0001 | -0.0326 |   |
| 0.0142 | 1   | .   |                             |        |        |        |         |         |   |
| 5275   | C   | C   | . PHE PHE PHE B B 260 260 . | 0.1721 | 0.1565 | 0.1626 | 0.0048  | -0.0014 | - |
| 0.0033 | 1   | .   |                             |        |        |        |         |         |   |
| 5276   | O   | O   | . PHE PHE PHE B B 260 260 . | 0.1625 | 0.1625 | 0.1723 | -0.0029 | -0.0018 | - |
| 0.0110 | 1   | .   |                             |        |        |        |         |         |   |
| 5277   | N   | N   | . LYS LYS LYS B B 261 261 . | 0.1696 | 0.1561 | 0.1617 | 0.0009  | -0.0041 | - |
| 0.0036 | 1   | .   |                             |        |        |        |         |         |   |
| 5278   | CA  | CA  | . LYS LYS LYS B B 261 261 . | 0.1755 | 0.1528 | 0.1648 | -0.0046 | -0.0034 |   |
| 0.0083 | 1   | .   |                             |        |        |        |         |         |   |
| 5279   | CB  | CB  | . LYS LYS LYS B B 261 261 . | 0.1708 | 0.1723 | 0.1301 | -0.0066 | -0.0010 |   |
| 0.0232 | 1   | .   |                             |        |        |        |         |         |   |
| 5280   | CG  | CG  | . LYS LYS LYS B B 261 261 . | 0.1870 | 0.1208 | 0.1582 | 0.0016  | -0.0061 |   |
| 0.0068 | 1   | .   |                             |        |        |        |         |         |   |
| 5281   | CD  | CD  | . LYS LYS LYS B B 261 261 . | 0.1280 | 0.0988 | 0.1106 | -0.0228 | 0.0111  |   |
| 0.0333 | 1   | .   |                             |        |        |        |         |         |   |
| 5282   | CE  | CE  | . LYS LYS LYS B B 261 261 . | 0.1898 | 0.1527 | 0.1530 | -0.0158 | -0.0445 | - |
| 0.0191 | 1   | .   |                             |        |        |        |         |         |   |
| 5283   | NZ  | NZ  | . LYS LYS LYS B B 261 261 . | 0.1553 | 0.1521 | 0.1663 | 0.0041  | -0.0393 | - |
| 0.0161 | 1   | .   |                             |        |        |        |         |         |   |
| 5284   | C   | C   | . LYS LYS LYS B B 261 261 . | 0.1787 | 0.1807 | 0.1766 | 0.0026  | -0.0044 |   |
| 0.0080 | 1   | .   |                             |        |        |        |         |         |   |
| 5285   | O   | O   | . LYS LYS LYS B B 261 261 . | 0.1646 | 0.1666 | 0.1728 | -0.0234 | -0.0022 |   |
| 0.0052 | 1   | .   |                             |        |        |        |         |         |   |
| 5286   | N   | N   | . SER SER SER B B 262 262 . | 0.2014 | 0.1861 | 0.2071 | -0.0038 | -0.0003 |   |
| 0.0112 | 1   | .   |                             |        |        |        |         |         |   |
| 5287   | CA  | CA  | . SER SER SER B B 262 262 . | 0.2462 | 0.2465 | 0.2597 | 0.0012  | -0.0076 | - |
| 0.0024 | 1   | .   |                             |        |        |        |         |         |   |
| 5288   | CB  | CB  | . SER SER SER B B 262 262 . | 0.2530 | 0.2344 | 0.2430 | -0.0055 | 0.0038  | - |
| 0.0056 | 1   | .   |                             |        |        |        |         |         |   |
| 5289   | OG  | OG  | . SER SER SER B B 262 262 . | 0.2612 | 0.3211 | 0.2771 | 0.0069  | -0.0265 | - |
| 0.0193 | 1   | .   |                             |        |        |        |         |         |   |
| 5290   | C   | C   | . SER SER SER B B 262 262 . | 0.2807 | 0.2636 | 0.2837 | -0.0001 | -0.0061 | - |
| 0.0025 | 1   | .   |                             |        |        |        |         |         |   |
| 5291   | O   | O   | . SER SER SER B B 262 262 . | 0.2823 | 0.2508 | 0.3090 | 0.0076  | -0.0136 | - |
| 0.0074 | 1   | .   |                             |        |        |        |         |         |   |
| 5292   | N   | N   | . PRO PRO PRO B B 263 263 . | 0.3047 | 0.2902 | 0.3031 | -0.0025 | -0.0083 | - |
| 0.0024 | 1   | .   |                             |        |        |        |         |         |   |













|        |     |     |                             |        |        |        |         |         |   |
|--------|-----|-----|-----------------------------|--------|--------|--------|---------|---------|---|
| 5473   | OD1 | OD1 | . ASP ASP ASP B B 285 285 . | 0.2027 | 0.1623 | 0.1611 | -0.0069 | 0.0208  | - |
| 0.0167 | 1   | .   |                             |        |        |        |         |         |   |
| 5474   | OD2 | OD2 | . ASP ASP ASP B B 285 285 . | 0.1796 | 0.1493 | 0.1770 | -0.0253 | 0.0172  | - |
| 0.0063 | 1   | .   |                             |        |        |        |         |         |   |
| 5475   | C   | C   | . ASP ASP ASP B B 285 285 . | 0.0512 | 0.0272 | 0.0290 | 0.0044  | -0.0016 | - |
| 0.0023 | 1   | .   |                             |        |        |        |         |         |   |
| 5476   | O   | O   | . ASP ASP ASP B B 285 285 . | 0.0554 | 0.0553 | 0.0554 | 0.0195  | -0.0100 | - |
| 0.0100 | 1   | .   |                             |        |        |        |         |         |   |
| 5477   | N   | N   | . TYR TYR TYR B B 286 286 . | 0.0262 | 0.0254 | 0.0265 | -0.0003 | 0.0010  | - |
| 0.0003 | 1   | .   |                             |        |        |        |         |         |   |
| 5478   | CA  | CA  | . TYR TYR TYR B B 286 286 . | 0.0253 | 0.0253 | 0.0253 | 0.0000  | 0.0000  |   |
| 0.0000 | 1   | .   |                             |        |        |        |         |         |   |
| 5479   | CB  | CB  | . TYR TYR TYR B B 286 286 . | 0.0253 | 0.0253 | 0.0253 | 0.0000  | 0.0000  |   |
| 0.0000 | 1   | .   |                             |        |        |        |         |         |   |
| 5480   | CG  | CG  | . TYR TYR TYR B B 286 286 . | 0.0586 | 0.0514 | 0.0299 | 0.0015  | 0.0123  | - |
| 0.0008 | 1   | .   |                             |        |        |        |         |         |   |
| 5481   | CD1 | CD1 | . TYR TYR TYR B B 286 286 . | 0.0915 | 0.1280 | 0.1043 | 0.0302  | 0.0017  | - |
| 0.0085 | 1   | .   |                             |        |        |        |         |         |   |
| 5482   | CE1 | CE1 | . TYR TYR TYR B B 286 286 . | 0.1323 | 0.1471 | 0.1124 | -0.0054 | -0.0093 | - |
| 0.0307 | 1   | .   |                             |        |        |        |         |         |   |
| 5483   | CZ  | CZ  | . TYR TYR TYR B B 286 286 . | 0.1748 | 0.1957 | 0.1727 | 0.0153  | -0.0032 |   |
| 0.0121 | 1   | .   |                             |        |        |        |         |         |   |
| 5484   | OH  | OH  | . TYR TYR TYR B B 286 286 . | 0.2400 | 0.2577 | 0.2319 | -0.0370 | -0.0104 | - |
| 0.0480 | 1   | .   |                             |        |        |        |         |         |   |
| 5485   | CE2 | CE2 | . TYR TYR TYR B B 286 286 . | 0.1190 | 0.1392 | 0.1122 | -0.0007 | -0.0095 | - |
| 0.0126 | 1   | .   |                             |        |        |        |         |         |   |
| 5486   | CD2 | CD2 | . TYR TYR TYR B B 286 286 . | 0.0711 | 0.0655 | 0.0537 | 0.0035  | 0.0226  | - |
| 0.0160 | 1   | .   |                             |        |        |        |         |         |   |
| 5487   | C   | C   | . TYR TYR TYR B B 286 286 . | 0.0255 | 0.0258 | 0.0256 | 0.0003  | -0.0002 | - |
| 0.0003 | 1   | .   |                             |        |        |        |         |         |   |
| 5488   | O   | O   | . TYR TYR TYR B B 286 286 . | 0.0254 | 0.0263 | 0.0258 | 0.0004  | 0.0002  |   |
| 0.0006 | 1   | .   |                             |        |        |        |         |         |   |
| 5489   | N   | N   | . PRO PRO PRO B B 287 287 . | 0.0312 | 0.0280 | 0.0255 | 0.0039  | -0.0011 | - |
| 0.0007 | 1   | .   |                             |        |        |        |         |         |   |
| 5490   | CA  | CA  | . PRO PRO PRO B B 287 287 . | 0.0296 | 0.0262 | 0.0321 | 0.0019  | 0.0054  |   |
| 0.0024 | 1   | .   |                             |        |        |        |         |         |   |
| 5491   | CB  | CB  | . PRO PRO PRO B B 287 287 . | 0.0345 | 0.0284 | 0.0382 | 0.0053  | 0.0108  |   |
| 0.0063 | 1   | .   |                             |        |        |        |         |         |   |
| 5492   | CG  | CG  | . PRO PRO PRO B B 287 287 . | 0.0584 | 0.0371 | 0.0671 | -0.0076 | 0.0036  | - |
| 0.0212 | 1   | .   |                             |        |        |        |         |         |   |
| 5493   | CD  | CD  | . PRO PRO PRO B B 287 287 . | 0.0523 | 0.0353 | 0.0492 | 0.0089  | 0.0083  |   |
| 0.0150 | 1   | .   |                             |        |        |        |         |         |   |
| 5494   | C   | C   | . PRO PRO PRO B B 287 287 . | 0.0281 | 0.0276 | 0.0285 | -0.0025 | 0.0030  | - |
| 0.0027 | 1   | .   |                             |        |        |        |         |         |   |
| 5495   | O   | O   | . PRO PRO PRO B B 287 287 . | 0.0253 | 0.0253 | 0.0253 | 0.0000  | 0.0000  |   |
| 0.0000 | 1   | .   |                             |        |        |        |         |         |   |
| 5496   | N   | N   | . VAL VAL VAL B B 288 288 . | 0.0285 | 0.0256 | 0.0254 | 0.0010  | 0.0006  |   |
| 0.0002 | 1   | .   |                             |        |        |        |         |         |   |
| 5497   | CA  | CA  | . VAL VAL VAL B B 288 288 . | 0.0259 | 0.0300 | 0.0324 | 0.0015  | 0.0010  |   |
| 0.0010 | 1   | .   |                             |        |        |        |         |         |   |
| 5498   | CB  | CB  | . VAL VAL VAL B B 288 288 . | 0.0253 | 0.0253 | 0.0253 | 0.0000  | 0.0000  |   |
| 0.0000 | 1   | .   |                             |        |        |        |         |         |   |
| 5499   | CG1 | CG1 | . VAL VAL VAL B B 288 288 . | 0.0523 | 0.0482 | 0.0325 | 0.0249  | 0.0140  |   |
| 0.0129 | 1   | .   |                             |        |        |        |         |         |   |
| 5500   | CG2 | CG2 | . VAL VAL VAL B B 288 288 . | 0.0525 | 0.0564 | 0.0458 | 0.0157  | -0.0205 | - |
| 0.0223 | 1   | .   |                             |        |        |        |         |         |   |
| 5501   | C   | C   | . VAL VAL VAL B B 288 288 . | 0.0253 | 0.0253 | 0.0253 | 0.0000  | 0.0000  |   |
| 0.0000 | 1   | .   |                             |        |        |        |         |         |   |
| 5502   | O   | O   | . VAL VAL VAL B B 288 288 . | 0.0322 | 0.0454 | 0.0281 | 0.0084  | -0.0017 | - |
| 0.0069 | 1   | .   |                             |        |        |        |         |         |   |







|        |     |     |                             |        |        |        |        |         |   |
|--------|-----|-----|-----------------------------|--------|--------|--------|--------|---------|---|
| 5563   | OD1 | OD1 | . ASP ASP ASP B B 296 296 . | 0.0285 | 0.0254 | 0.0255 | 0.0007 | -0.0008 | - |
| 0.0001 | 1   | .   |                             |        |        |        |        |         |   |
| 5564   | OD2 | OD2 | . ASP ASP ASP B B 296 296 . | 0.0411 | 0.0322 | 0.0433 | 0.0092 | -0.0126 | - |
| 0.0108 | 1   | .   |                             |        |        |        |        |         |   |
| 5565   | C   | C   | . ASP ASP ASP B B 296 296 . | 0.0253 | 0.0253 | 0.0253 | 0.0000 | 0.0000  |   |
| 0.0000 | 1   | .   |                             |        |        |        |        |         |   |
| 5566   | O   | O   | . ASP ASP ASP B B 296 296 . | 0.0253 | 0.0253 | 0.0253 | 0.0000 | 0.0000  |   |
| 0.0000 | 1   | .   |                             |        |        |        |        |         |   |
| 5567   | N   | N   | . GLN GLN GLN B B 297 297 . | 0.0253 | 0.0253 | 0.0253 | 0.0000 | 0.0000  |   |
| 0.0000 | 1   | .   |                             |        |        |        |        |         |   |
| 5568   | CA  | CA  | . GLN GLN GLN B B 297 297 . | 0.0253 | 0.0253 | 0.0253 | 0.0000 | 0.0000  |   |
| 0.0000 | 1   | .   |                             |        |        |        |        |         |   |
| 5569   | CB  | CB  | . GLN GLN GLN B B 297 297 . | 0.0253 | 0.0253 | 0.0253 | 0.0000 | 0.0000  |   |
| 0.0000 | 1   | .   |                             |        |        |        |        |         |   |
| 5570   | CG  | CG  | . GLN GLN GLN B B 297 297 . | 0.0253 | 0.0253 | 0.0253 | 0.0000 | 0.0000  |   |
| 0.0000 | 1   | .   |                             |        |        |        |        |         |   |
| 5571   | CD  | CD  | . GLN GLN GLN B B 297 297 . | 0.0253 | 0.0253 | 0.0253 | 0.0000 | 0.0000  |   |
| 0.0000 | 1   | .   |                             |        |        |        |        |         |   |
| 5572   | OE1 | OE1 | . GLN GLN GLN B B 297 297 . | 0.0320 | 0.0278 | 0.0254 | 0.0041 | 0.0008  |   |
| 0.0005 | 1   | .   |                             |        |        |        |        |         |   |
| 5573   | NE2 | NE2 | . GLN GLN GLN B B 297 297 . | 0.0253 | 0.0253 | 0.0253 | 0.0000 | 0.0000  |   |
| 0.0000 | 1   | .   |                             |        |        |        |        |         |   |
| 5574   | C   | C   | . GLN GLN GLN B B 297 297 . | 0.0253 | 0.0253 | 0.0253 | 0.0000 | 0.0000  |   |
| 0.0000 | 1   | .   |                             |        |        |        |        |         |   |
| 5575   | O   | O   | . GLN GLN GLN B B 297 297 . | 0.0253 | 0.0253 | 0.0253 | 0.0000 | 0.0000  |   |
| 0.0000 | 1   | .   |                             |        |        |        |        |         |   |
| 5576   | N   | N   | . ASP ASP ASP B B 298 298 . | 0.0253 | 0.0253 | 0.0253 | 0.0000 | 0.0000  |   |
| 0.0000 | 1   | .   |                             |        |        |        |        |         |   |
| 5577   | CA  | CA  | . ASP ASP ASP B B 298 298 . | 0.0253 | 0.0253 | 0.0253 | 0.0000 | 0.0000  |   |
| 0.0000 | 1   | .   |                             |        |        |        |        |         |   |
| 5578   | CB  | CB  | . ASP ASP ASP B B 298 298 . | 0.0253 | 0.0256 | 0.0275 | 0.0000 | -0.0001 | - |
| 0.0008 | 1   | .   |                             |        |        |        |        |         |   |
| 5579   | CG  | CG  | . ASP ASP ASP B B 298 298 . | 0.0253 | 0.0253 | 0.0253 | 0.0000 | 0.0000  |   |
| 0.0000 | 1   | .   |                             |        |        |        |        |         |   |
| 5580   | OD1 | OD1 | . ASP ASP ASP B B 298 298 . | 0.0302 | 0.0268 | 0.0264 | 0.0026 | 0.0002  | - |
| 0.0002 | 1   | .   |                             |        |        |        |        |         |   |
| 5581   | OD2 | OD2 | . ASP ASP ASP B B 298 298 . | 0.0276 | 0.0448 | 0.0335 | 0.0067 | -0.0043 | - |
| 0.0126 | 1   | .   |                             |        |        |        |        |         |   |
| 5582   | C   | C   | . ASP ASP ASP B B 298 298 . | 0.0253 | 0.0253 | 0.0253 | 0.0000 | 0.0000  |   |
| 0.0000 | 1   | .   |                             |        |        |        |        |         |   |
| 5583   | O   | O   | . ASP ASP ASP B B 298 298 . | 0.0253 | 0.0253 | 0.0253 | 0.0000 | 0.0000  |   |
| 0.0000 | 1   | .   |                             |        |        |        |        |         |   |
| 5584   | N   | N   | . ASP ASP ASP B B 299 299 . | 0.0253 | 0.0253 | 0.0253 | 0.0000 | 0.0000  |   |
| 0.0000 | 1   | .   |                             |        |        |        |        |         |   |
| 5585   | CA  | CA  | . ASP ASP ASP B B 299 299 . | 0.0253 | 0.0253 | 0.0253 | 0.0000 | 0.0000  |   |
| 0.0000 | 1   | .   |                             |        |        |        |        |         |   |
| 5586   | CB  | CB  | . ASP ASP ASP B B 299 299 . | 0.0253 | 0.0253 | 0.0253 | 0.0000 | 0.0000  |   |
| 0.0000 | 1   | .   |                             |        |        |        |        |         |   |
| 5587   | CG  | CG  | . ASP ASP ASP B B 299 299 . | 0.0253 | 0.0253 | 0.0253 | 0.0000 | 0.0000  |   |
| 0.0000 | 1   | .   |                             |        |        |        |        |         |   |
| 5588   | OD1 | OD1 | . ASP ASP ASP B B 299 299 . | 0.0253 | 0.0253 | 0.0253 | 0.0000 | 0.0000  |   |
| 0.0000 | 1   | .   |                             |        |        |        |        |         |   |
| 5589   | OD2 | OD2 | . ASP ASP ASP B B 299 299 . | 0.0253 | 0.0253 | 0.0253 | 0.0000 | 0.0000  |   |
| 0.0000 | 1   | .   |                             |        |        |        |        |         |   |
| 5590   | C   | C   | . ASP ASP ASP B B 299 299 . | 0.0253 | 0.0253 | 0.0253 | 0.0000 | 0.0000  |   |
| 0.0000 | 1   | .   |                             |        |        |        |        |         |   |
| 5591   | O   | O   | . ASP ASP ASP B B 299 299 . | 0.0253 | 0.0253 | 0.0253 | 0.0000 | 0.0000  |   |
| 0.0000 | 1   | .   |                             |        |        |        |        |         |   |
| 5592   | N   | N   | . TRP TRP TRP B B 300 300 . | 0.0253 | 0.0253 | 0.0253 | 0.0000 | 0.0000  |   |
| 0.0000 | 1   | .   |                             |        |        |        |        |         |   |

















|        |     |     |                             |        |        |        |         |         |   |
|--------|-----|-----|-----------------------------|--------|--------|--------|---------|---------|---|
| 5803   | N   | N   | . ILE ILE ILE B B 327 327 . | 0.0320 | 0.0255 | 0.0274 | 0.0000  | -0.0016 |   |
| 0.0005 | 1   | .   |                             |        |        |        |         |         |   |
| 5804   | CA  | CA  | . ILE ILE ILE B B 327 327 . | 0.0253 | 0.0253 | 0.0253 | 0.0000  | 0.0000  |   |
| 0.0000 | 1   | .   |                             |        |        |        |         |         |   |
| 5805   | CB  | CB  | . ILE ILE ILE B B 327 327 . | 0.0397 | 0.0328 | 0.0439 | 0.0016  | -0.0142 |   |
| 0.0041 | 1   | .   |                             |        |        |        |         |         |   |
| 5806   | CG1 | CG1 | . ILE ILE ILE B B 327 327 . | 0.0384 | 0.0340 | 0.0291 | 0.0075  | 0.0063  |   |
| 0.0018 | 1   | .   |                             |        |        |        |         |         |   |
| 5807   | CD1 | CD1 | . ILE ILE ILE B B 327 327 . | 0.0504 | 0.0342 | 0.0790 | 0.0028  | 0.0186  |   |
| 0.0043 | 1   | .   |                             |        |        |        |         |         |   |
| 5808   | CG2 | CG2 | . ILE ILE ILE B B 327 327 . | 0.0497 | 0.0395 | 0.0370 | 0.0159  | 0.0071  |   |
| 0.0107 | 1   | .   |                             |        |        |        |         |         |   |
| 5809   | C   | C   | . ILE ILE ILE B B 327 327 . | 0.0315 | 0.0344 | 0.0265 | 0.0033  | 0.0016  | - |
| 0.0014 | 1   | .   |                             |        |        |        |         |         |   |
| 5810   | O   | O   | . ILE ILE ILE B B 327 327 . | 0.0309 | 0.0302 | 0.0281 | -0.0052 | -0.0039 |   |
| 0.0037 | 1   | .   |                             |        |        |        |         |         |   |
| 5811   | N   | N   | . GLU GLU GLU B B 328 328 . | 0.0334 | 0.0255 | 0.0279 | -0.0013 | -0.0046 |   |
| 0.0007 | 1   | .   |                             |        |        |        |         |         |   |
| 5812   | CA  | CA  | . GLU GLU GLU B B 328 328 . | 0.0659 | 0.0663 | 0.0744 | 0.0095  | -0.0095 |   |
| 0.0039 | 1   | .   |                             |        |        |        |         |         |   |
| 5813   | CB  | CB  | . GLU GLU GLU B B 328 328 . | 0.0756 | 0.0903 | 0.0976 | 0.0052  | 0.0119  |   |
| 0.0068 | 1   | .   |                             |        |        |        |         |         |   |
| 5814   | CG  | CG  | . GLU GLU GLU B B 328 328 . | 0.1531 | 0.1789 | 0.2196 | -0.0019 | 0.0198  |   |
| 0.0179 | 1   | .   |                             |        |        |        |         |         |   |
| 5815   | CD  | CD  | . GLU GLU GLU B B 328 328 . | 0.3101 | 0.3202 | 0.2989 | -0.0063 | -0.0110 | - |
| 0.0122 | 1   | .   |                             |        |        |        |         |         |   |
| 5816   | OE1 | OE1 | . GLU GLU GLU B B 328 328 . | 0.3007 | 0.3429 | 0.3144 | -0.0048 | 0.0301  |   |
| 0.0595 | 1   | .   |                             |        |        |        |         |         |   |
| 5817   | OE2 | OE2 | . GLU GLU GLU B B 328 328 . | 0.3185 | 0.3946 | 0.3744 | -0.0522 | -0.0032 |   |
| 0.0171 | 1   | .   |                             |        |        |        |         |         |   |
| 5818   | C   | C   | . GLU GLU GLU B B 328 328 . | 0.0477 | 0.0528 | 0.0489 | 0.0064  | -0.0021 |   |
| 0.0009 | 1   | .   |                             |        |        |        |         |         |   |
| 5819   | O   | O   | . GLU GLU GLU B B 328 328 . | 0.0734 | 0.0804 | 0.0895 | 0.0062  | -0.0105 | - |
| 0.0052 | 1   | .   |                             |        |        |        |         |         |   |
| 5820   | N   | N   | . ARG ARG ARG B B 329 329 . | 0.0303 | 0.0434 | 0.0488 | 0.0089  | -0.0058 | - |
| 0.0042 | 1   | .   |                             |        |        |        |         |         |   |
| 5821   | CA  | CA  | . ARG ARG ARG B B 329 329 . | 0.0320 | 0.0299 | 0.0272 | -0.0024 | 0.0018  | - |
| 0.0007 | 1   | .   |                             |        |        |        |         |         |   |
| 5822   | CB  | CB  | . ARG ARG ARG B B 329 329 . | 0.0692 | 0.0526 | 0.0616 | 0.0051  | 0.0120  | - |
| 0.0011 | 1   | .   |                             |        |        |        |         |         |   |
| 5823   | CG  | CG  | . ARG ARG ARG B B 329 329 . | 0.0480 | 0.0454 | 0.0550 | -0.0123 | -0.0013 | - |
| 0.0001 | 1   | .   |                             |        |        |        |         |         |   |
| 5824   | CD  | CD  | . ARG ARG ARG B B 329 329 . | 0.0785 | 0.0702 | 0.0541 | 0.0096  | 0.0056  | - |
| 0.0099 | 1   | .   |                             |        |        |        |         |         |   |
| 5825   | NE  | NE  | . ARG ARG ARG B B 329 329 . | 0.0546 | 0.0253 | 0.0410 | -0.0007 | -0.0184 |   |
| 0.0004 | 1   | .   |                             |        |        |        |         |         |   |
| 5826   | CZ  | CZ  | . ARG ARG ARG B B 329 329 . | 0.0695 | 0.0583 | 0.0647 | 0.0082  | -0.0002 |   |
| 0.0091 | 1   | .   |                             |        |        |        |         |         |   |
| 5827   | NH1 | NH1 | . ARG ARG ARG B B 329 329 . | 0.0888 | 0.0896 | 0.0780 | 0.0493  | 0.0077  |   |
| 0.0186 | 1   | .   |                             |        |        |        |         |         |   |
| 5828   | NH2 | NH2 | . ARG ARG ARG B B 329 329 . | 0.0496 | 0.0271 | 0.0617 | 0.0057  | 0.0112  |   |
| 0.0063 | 1   | .   |                             |        |        |        |         |         |   |
| 5829   | C   | C   | . ARG ARG ARG B B 329 329 . | 0.0253 | 0.0253 | 0.0253 | 0.0000  | 0.0000  |   |
| 0.0000 | 1   | .   |                             |        |        |        |         |         |   |
| 5830   | O   | O   | . ARG ARG ARG B B 329 329 . | 0.0340 | 0.0406 | 0.0436 | 0.0070  | 0.0057  | - |
| 0.0071 | 1   | .   |                             |        |        |        |         |         |   |
| 5831   | N   | N   | . ALA ALA ALA B B 330 330 . | 0.0253 | 0.0253 | 0.0253 | 0.0000  | 0.0000  |   |
| 0.0000 | 1   | .   |                             |        |        |        |         |         |   |
| 5832   | CA  | CA  | . ALA ALA ALA B B 330 330 . | 0.0258 | 0.0256 | 0.0268 | -0.0004 | -0.0008 |   |
| 0.0007 | 1   | .   |                             |        |        |        |         |         |   |









|        |     |     |                             |        |        |        |         |         |   |
|--------|-----|-----|-----------------------------|--------|--------|--------|---------|---------|---|
| 5953   | CA  | CA  | . ILE ILE ILE B B 346 346 . | 0.0262 | 0.0260 | 0.0307 | -0.0008 | -0.0021 |   |
| 0.0020 | 1   | .   |                             |        |        |        |         |         |   |
| 5954   | CB  | CB  | . ILE ILE ILE B B 346 346 . | 0.0401 | 0.0468 | 0.0348 | 0.0108  | 0.0047  |   |
| 0.0113 | 1   | .   |                             |        |        |        |         |         |   |
| 5955   | CG1 | CG1 | . ILE ILE ILE B B 346 346 . | 0.0253 | 0.0253 | 0.0254 | 0.0000  | 0.0000  |   |
| 0.0000 | 1   | .   |                             |        |        |        |         |         |   |
| 5956   | CD1 | CD1 | . ILE ILE ILE B B 346 346 . | 0.1019 | 0.0780 | 0.0629 | 0.0370  | -0.0308 |   |
| 0.0147 | 1   | .   |                             |        |        |        |         |         |   |
| 5957   | CG2 | CG2 | . ILE ILE ILE B B 346 346 . | 0.0279 | 0.0280 | 0.0321 | -0.0027 | 0.0042  | - |
| 0.0043 | 1   | .   |                             |        |        |        |         |         |   |
| 5958   | C   | C   | . ILE ILE ILE B B 346 346 . | 0.0313 | 0.0277 | 0.0313 | 0.0037  | 0.0060  |   |
| 0.0037 | 1   | .   |                             |        |        |        |         |         |   |
| 5959   | O   | O   | . ILE ILE ILE B B 346 346 . | 0.0606 | 0.0570 | 0.0552 | 0.0175  | 0.0127  |   |
| 0.0110 | 1   | .   |                             |        |        |        |         |         |   |
| 5960   | N   | N   | . GLY GLY GLY B B 347 347 . | 0.0330 | 0.0330 | 0.0294 | 0.0077  | 0.0056  |   |
| 0.0056 | 1   | .   |                             |        |        |        |         |         |   |
| 5961   | CA  | CA  | . GLY GLY GLY B B 347 347 . | 0.0547 | 0.0449 | 0.0453 | 0.0051  | 0.0087  | - |
| 0.0023 | 1   | .   |                             |        |        |        |         |         |   |
| 5962   | C   | C   | . GLY GLY GLY B B 347 347 . | 0.0390 | 0.0340 | 0.0367 | 0.0035  | 0.0075  | - |
| 0.0056 | 1   | .   |                             |        |        |        |         |         |   |
| 5963   | O   | O   | . GLY GLY GLY B B 347 347 . | 0.0843 | 0.0653 | 0.0686 | 0.0120  | 0.0164  |   |
| 0.0050 | 1   | .   |                             |        |        |        |         |         |   |
| 5964   | N   | N   | . SER SER SER B B 348 348 . | 0.0300 | 0.0266 | 0.0264 | 0.0005  | 0.0015  | - |
| 0.0007 | 1   | .   |                             |        |        |        |         |         |   |
| 5965   | CA  | CA  | . SER SER SER B B 348 348 . | 0.0253 | 0.0253 | 0.0253 | 0.0000  | 0.0000  |   |
| 0.0000 | 1   | .   |                             |        |        |        |         |         |   |
| 5966   | CB  | CB  | . SER SER SER B B 348 348 . | 0.0255 | 0.0253 | 0.0253 | 0.0000  | 0.0000  |   |
| 0.0000 | 1   | .   |                             |        |        |        |         |         |   |
| 5967   | OG  | OG  | . SER SER SER B B 348 348 . | 0.0586 | 0.0570 | 0.0350 | 0.0300  | -0.0062 |   |
| 0.0005 | 1   | .   |                             |        |        |        |         |         |   |
| 5968   | C   | C   | . SER SER SER B B 348 348 . | 0.0319 | 0.0291 | 0.0285 | -0.0050 | -0.0045 |   |
| 0.0034 | 1   | .   |                             |        |        |        |         |         |   |
| 5969   | O   | O   | . SER SER SER B B 348 348 . | 0.0265 | 0.0259 | 0.0257 | -0.0008 | 0.0007  | - |
| 0.0004 | 1   | .   |                             |        |        |        |         |         |   |
| 5970   | N   | N   | . VAL VAL VAL B B 349 349 . | 0.0357 | 0.0290 | 0.0290 | -0.0027 | 0.0014  |   |
| 0.0028 | 1   | .   |                             |        |        |        |         |         |   |
| 5971   | CA  | CA  | . VAL VAL VAL B B 349 349 . | 0.0472 | 0.0373 | 0.0432 | -0.0043 | -0.0023 |   |
| 0.0038 | 1   | .   |                             |        |        |        |         |         |   |
| 5972   | CB  | CB  | . VAL VAL VAL B B 349 349 . | 0.0426 | 0.0355 | 0.0291 | 0.0021  | -0.0004 |   |
| 0.0061 | 1   | .   |                             |        |        |        |         |         |   |
| 5973   | CG1 | CG1 | . VAL VAL VAL B B 349 349 . | 0.1037 | 0.0581 | 0.0733 | 0.0088  | -0.0296 |   |
| 0.0168 | 1   | .   |                             |        |        |        |         |         |   |
| 5974   | CG2 | CG2 | . VAL VAL VAL B B 349 349 . | 0.0290 | 0.0461 | 0.0366 | 0.0037  | 0.0008  | - |
| 0.0094 | 1   | .   |                             |        |        |        |         |         |   |
| 5975   | C   | C   | . VAL VAL VAL B B 349 349 . | 0.0395 | 0.0404 | 0.0403 | 0.0132  | 0.0000  |   |
| 0.0018 | 1   | .   |                             |        |        |        |         |         |   |
| 5976   | O   | O   | . VAL VAL VAL B B 349 349 . | 0.0322 | 0.0272 | 0.0260 | 0.0036  | 0.0022  |   |
| 0.0011 | 1   | .   |                             |        |        |        |         |         |   |
| 5977   | N   | N   | . THR THR THR B B 350 350 . | 0.0483 | 0.0511 | 0.0464 | 0.0027  | -0.0064 | - |
| 0.0064 | 1   | .   |                             |        |        |        |         |         |   |
| 5978   | CA  | CA  | . THR THR THR B B 350 350 . | 0.0685 | 0.0636 | 0.0641 | -0.0010 | -0.0007 |   |
| 0.0047 | 1   | .   |                             |        |        |        |         |         |   |
| 5979   | CB  | CB  | . THR THR THR B B 350 350 . | 0.0729 | 0.0926 | 0.0832 | 0.0032  | 0.0025  |   |
| 0.0164 | 1   | .   |                             |        |        |        |         |         |   |
| 5980   | OG1 | OG1 | . THR THR THR B B 350 350 . | 0.0593 | 0.0676 | 0.0760 | -0.0011 | -0.0018 |   |
| 0.0129 | 1   | .   |                             |        |        |        |         |         |   |
| 5981   | CG2 | CG2 | . THR THR THR B B 350 350 . | 0.1301 | 0.1247 | 0.0944 | -0.0028 | -0.0143 | - |
| 0.0076 | 1   | .   |                             |        |        |        |         |         |   |
| 5982   | C   | C   | . THR THR THR B B 350 350 . | 0.0419 | 0.0442 | 0.0338 | -0.0030 | -0.0064 |   |
| 0.0048 | 1   | .   |                             |        |        |        |         |         |   |



|        |     |     |                             |        |        |        |         |         |   |
|--------|-----|-----|-----------------------------|--------|--------|--------|---------|---------|---|
| 5983   | O   | O   | . THR THR THR B B 350 350 . | 0.0576 | 0.0754 | 0.0503 | 0.0013  | 0.0124  | - |
| 0.0097 | 1   | .   |                             |        |        |        |         |         |   |
| 5984   | N   | N   | . GLU GLU GLU B B 351 351 . | 0.0427 | 0.0374 | 0.0302 | 0.0005  | -0.0066 |   |
| 0.0051 | 1   | .   |                             |        |        |        |         |         |   |
| 5985   | CA  | CA  | . GLU GLU GLU B B 351 351 . | 0.0403 | 0.0453 | 0.0489 | -0.0052 | -0.0029 |   |
| 0.0021 | 1   | .   |                             |        |        |        |         |         |   |
| 5986   | CB  | CB  | . GLU GLU GLU B B 351 351 . | 0.0900 | 0.0412 | 0.0460 | 0.0169  | -0.0062 | - |
| 0.0010 | 1   | .   |                             |        |        |        |         |         |   |
| 5987   | CG  | CG  | . GLU GLU GLU B B 351 351 . | 0.0546 | 0.0703 | 0.0515 | 0.0067  | 0.0210  | - |
| 0.0005 | 1   | .   |                             |        |        |        |         |         |   |
| 5988   | CD  | CD  | . GLU GLU GLU B B 351 351 . | 0.0864 | 0.0960 | 0.0997 | -0.0110 | -0.0006 | - |
| 0.0044 | 1   | .   |                             |        |        |        |         |         |   |
| 5989   | OE1 | OE1 | . GLU GLU GLU B B 351 351 . | 0.0735 | 0.0833 | 0.0711 | -0.0063 | 0.0094  |   |
| 0.0077 | 1   | .   |                             |        |        |        |         |         |   |
| 5990   | OE2 | OE2 | . GLU GLU GLU B B 351 351 . | 0.1392 | 0.1375 | 0.1499 | 0.0130  | -0.0105 |   |
| 0.0131 | 1   | .   |                             |        |        |        |         |         |   |
| 5991   | C   | C   | . GLU GLU GLU B B 351 351 . | 0.0303 | 0.0383 | 0.0328 | 0.0081  | 0.0061  |   |
| 0.0098 | 1   | .   |                             |        |        |        |         |         |   |
| 5992   | O   | O   | . GLU GLU GLU B B 351 351 . | 0.0392 | 0.0490 | 0.0362 | 0.0122  | -0.0012 |   |
| 0.0107 | 1   | .   |                             |        |        |        |         |         |   |
| 5993   | N   | N   | . ALA ALA ALA B B 352 352 . | 0.0256 | 0.0296 | 0.0299 | 0.0012  | 0.0012  |   |
| 0.0044 | 1   | .   |                             |        |        |        |         |         |   |
| 5994   | CA  | CA  | . ALA ALA ALA B B 352 352 . | 0.0254 | 0.0254 | 0.0253 | 0.0001  | 0.0000  |   |
| 0.0000 | 1   | .   |                             |        |        |        |         |         |   |
| 5995   | CB  | CB  | . ALA ALA ALA B B 352 352 . | 0.0392 | 0.0410 | 0.0378 | 0.0052  | -0.0117 | - |
| 0.0105 | 1   | .   |                             |        |        |        |         |         |   |
| 5996   | C   | C   | . ALA ALA ALA B B 352 352 . | 0.0263 | 0.0258 | 0.0268 | 0.0007  | 0.0012  |   |
| 0.0008 | 1   | .   |                             |        |        |        |         |         |   |
| 5997   | O   | O   | . ALA ALA ALA B B 352 352 . | 0.0273 | 0.0301 | 0.0269 | 0.0030  | 0.0018  |   |
| 0.0028 | 1   | .   |                             |        |        |        |         |         |   |
| 5998   | N   | N   | . ILE ILE ILE B B 353 353 . | 0.0390 | 0.0298 | 0.0381 | 0.0062  | -0.0122 | - |
| 0.0073 | 1   | .   |                             |        |        |        |         |         |   |
| 5999   | CA  | CA  | . ILE ILE ILE B B 353 353 . | 0.0347 | 0.0305 | 0.0439 | 0.0053  | -0.0029 | - |
| 0.0010 | 1   | .   |                             |        |        |        |         |         |   |
| 6000   | CB  | CB  | . ILE ILE ILE B B 353 353 . | 0.0310 | 0.0312 | 0.0382 | -0.0014 | -0.0048 |   |
| 0.0082 | 1   | .   |                             |        |        |        |         |         |   |
| 6001   | CG1 | CG1 | . ILE ILE ILE B B 353 353 . | 0.0529 | 0.0864 | 0.0434 | 0.0163  | 0.0081  |   |
| 0.0096 | 1   | .   |                             |        |        |        |         |         |   |
| 6002   | CD1 | CD1 | . ILE ILE ILE B B 353 353 . | 0.0974 | 0.0641 | 0.0669 | -0.0070 | 0.0062  |   |
| 0.0300 | 1   | .   |                             |        |        |        |         |         |   |
| 6003   | CG2 | CG2 | . ILE ILE ILE B B 353 353 . | 0.0413 | 0.0561 | 0.0488 | -0.0054 | 0.0054  | - |
| 0.0146 | 1   | .   |                             |        |        |        |         |         |   |
| 6004   | C   | C   | . ILE ILE ILE B B 353 353 . | 0.0622 | 0.0291 | 0.0306 | -0.0026 | 0.0020  | - |
| 0.0044 | 1   | .   |                             |        |        |        |         |         |   |
| 6005   | O   | O   | . ILE ILE ILE B B 353 353 . | 0.0759 | 0.0630 | 0.0582 | -0.0009 | 0.0187  |   |
| 0.0117 | 1   | .   |                             |        |        |        |         |         |   |
| 6006   | N   | N   | . GLN GLN GLN B B 354 354 . | 0.0468 | 0.0594 | 0.0593 | 0.0096  | -0.0050 |   |
| 0.0132 | 1   | .   |                             |        |        |        |         |         |   |
| 6007   | CA  | CA  | . GLN GLN GLN B B 354 354 . | 0.0617 | 0.0545 | 0.0450 | 0.0059  | 0.0050  |   |
| 0.0072 | 1   | .   |                             |        |        |        |         |         |   |
| 6008   | CB  | CB  | . GLN GLN GLN B B 354 354 . | 0.1274 | 0.0889 | 0.0986 | 0.0249  | 0.0079  |   |
| 0.0104 | 1   | .   |                             |        |        |        |         |         |   |
| 6009   | CG  | CG  | . GLN GLN GLN B B 354 354 . | 0.2124 | 0.1740 | 0.1780 | 0.0030  | 0.0262  |   |
| 0.0246 | 1   | .   |                             |        |        |        |         |         |   |
| 6010   | CD  | CD  | . GLN GLN GLN B B 354 354 . | 0.3375 | 0.2484 | 0.3111 | 0.0280  | 0.0023  |   |
| 0.0118 | 1   | .   |                             |        |        |        |         |         |   |
| 6011   | OE1 | OE1 | . GLN GLN GLN B B 354 354 . | 0.4396 | 0.3510 | 0.3385 | 0.0075  | -0.0356 |   |
| 0.0010 | 1   | .   |                             |        |        |        |         |         |   |
| 6012   | NE2 | NE2 | . GLN GLN GLN B B 354 354 . | 0.3696 | 0.3234 | 0.3105 | 0.0265  | -0.0318 |   |
| 0.0185 | 1   | .   |                             |        |        |        |         |         |   |













|        |     |     |                             |        |        |        |         |         |   |
|--------|-----|-----|-----------------------------|--------|--------|--------|---------|---------|---|
| 6193   | C   | C   | . THR THR THR B B 378 378 . | 0.0253 | 0.0253 | 0.0253 | 0.0000  | 0.0000  |   |
| 0.0000 | 1   | .   |                             |        |        |        |         |         |   |
| 6194   | O   | O   | . THR THR THR B B 378 378 . | 0.0312 | 0.0253 | 0.0281 | 0.0003  | 0.0040  |   |
| 0.0002 | 1   | .   |                             |        |        |        |         |         |   |
| 6195   | N   | N   | . PHE PHE PHE B B 379 379 . | 0.0253 | 0.0253 | 0.0253 | 0.0000  | 0.0000  |   |
| 0.0000 | 1   | .   |                             |        |        |        |         |         |   |
| 6196   | CA  | CA  | . PHE PHE PHE B B 379 379 . | 0.0253 | 0.0253 | 0.0253 | 0.0000  | 0.0000  |   |
| 0.0000 | 1   | .   |                             |        |        |        |         |         |   |
| 6197   | CB  | CB  | . PHE PHE PHE B B 379 379 . | 0.0253 | 0.0253 | 0.0253 | 0.0000  | 0.0000  |   |
| 0.0000 | 1   | .   |                             |        |        |        |         |         |   |
| 6198   | CG  | CG  | . PHE PHE PHE B B 379 379 . | 0.0253 | 0.0253 | 0.0253 | 0.0000  | 0.0000  |   |
| 0.0000 | 1   | .   |                             |        |        |        |         |         |   |
| 6199   | CD1 | CD1 | . PHE PHE PHE B B 379 379 . | 0.0539 | 0.0500 | 0.0509 | 0.0078  | -0.0102 | - |
| 0.0010 | 1   | .   |                             |        |        |        |         |         |   |
| 6200   | CE1 | CE1 | . PHE PHE PHE B B 379 379 . | 0.0427 | 0.0613 | 0.0288 | 0.0045  | -0.0037 | - |
| 0.0107 | 1   | .   |                             |        |        |        |         |         |   |
| 6201   | CZ  | CZ  | . PHE PHE PHE B B 379 379 . | 0.0469 | 0.0330 | 0.0377 | 0.0002  | -0.0010 | - |
| 0.0097 | 1   | .   |                             |        |        |        |         |         |   |
| 6202   | CE2 | CE2 | . PHE PHE PHE B B 379 379 . | 0.0981 | 0.0737 | 0.0766 | 0.0065  | -0.0118 |   |
| 0.0220 | 1   | .   |                             |        |        |        |         |         |   |
| 6203   | CD2 | CD2 | . PHE PHE PHE B B 379 379 . | 0.0457 | 0.0333 | 0.0708 | 0.0124  | 0.0014  |   |
| 0.0048 | 1   | .   |                             |        |        |        |         |         |   |
| 6204   | C   | C   | . PHE PHE PHE B B 379 379 . | 0.0253 | 0.0253 | 0.0253 | 0.0000  | 0.0000  |   |
| 0.0000 | 1   | .   |                             |        |        |        |         |         |   |
| 6205   | O   | O   | . PHE PHE PHE B B 379 379 . | 0.0253 | 0.0253 | 0.0253 | 0.0000  | 0.0000  |   |
| 0.0000 | 1   | .   |                             |        |        |        |         |         |   |
| 6206   | N   | N   | . ILE ILE ILE B B 380 380 . | 0.0253 | 0.0253 | 0.0253 | 0.0000  | 0.0000  |   |
| 0.0000 | 1   | .   |                             |        |        |        |         |         |   |
| 6207   | CA  | CA  | . ILE ILE ILE B B 380 380 . | 0.0253 | 0.0253 | 0.0253 | 0.0000  | 0.0000  |   |
| 0.0000 | 1   | .   |                             |        |        |        |         |         |   |
| 6208   | CB  | CB  | . ILE ILE ILE B B 380 380 . | 0.0253 | 0.0253 | 0.0253 | 0.0000  | 0.0000  |   |
| 0.0000 | 1   | .   |                             |        |        |        |         |         |   |
| 6209   | CG1 | CG1 | . ILE ILE ILE B B 380 380 . | 0.0253 | 0.0253 | 0.0253 | 0.0000  | 0.0000  |   |
| 0.0000 | 1   | .   |                             |        |        |        |         |         |   |
| 6210   | CD1 | CD1 | . ILE ILE ILE B B 380 380 . | 0.0352 | 0.0261 | 0.0352 | -0.0028 | -0.0099 |   |
| 0.0028 | 1   | .   |                             |        |        |        |         |         |   |
| 6211   | CG2 | CG2 | . ILE ILE ILE B B 380 380 . | 0.0253 | 0.0253 | 0.0253 | 0.0000  | 0.0000  |   |
| 0.0000 | 1   | .   |                             |        |        |        |         |         |   |
| 6212   | C   | C   | . ILE ILE ILE B B 380 380 . | 0.0253 | 0.0253 | 0.0253 | 0.0000  | 0.0000  |   |
| 0.0000 | 1   | .   |                             |        |        |        |         |         |   |
| 6213   | O   | O   | . ILE ILE ILE B B 380 380 . | 0.0253 | 0.0253 | 0.0253 | 0.0000  | 0.0000  |   |
| 0.0000 | 1   | .   |                             |        |        |        |         |         |   |
| 6214   | N   | N   | . ALA ALA ALA B B 381 381 . | 0.0253 | 0.0253 | 0.0253 | 0.0000  | 0.0000  |   |
| 0.0000 | 1   | .   |                             |        |        |        |         |         |   |
| 6215   | CA  | CA  | . ALA ALA ALA B B 381 381 . | 0.0253 | 0.0253 | 0.0253 | 0.0000  | 0.0000  |   |
| 0.0000 | 1   | .   |                             |        |        |        |         |         |   |
| 6216   | CB  | CB  | . ALA ALA ALA B B 381 381 . | 0.0253 | 0.0253 | 0.0253 | 0.0000  | 0.0000  |   |
| 0.0000 | 1   | .   |                             |        |        |        |         |         |   |
| 6217   | C   | C   | . ALA ALA ALA B B 381 381 . | 0.0295 | 0.0269 | 0.0257 | 0.0025  | 0.0013  |   |
| 0.0008 | 1   | .   |                             |        |        |        |         |         |   |
| 6218   | O   | O   | . ALA ALA ALA B B 381 381 . | 0.0284 | 0.0264 | 0.0282 | 0.0018  | -0.0030 | - |
| 0.0017 | 1   | .   |                             |        |        |        |         |         |   |
| 6219   | N   | N   | . ASP ASP ASP B B 382 382 . | 0.0253 | 0.0253 | 0.0253 | 0.0000  | 0.0000  |   |
| 0.0000 | 1   | .   |                             |        |        |        |         |         |   |
| 6220   | CA  | CA  | . ASP ASP ASP B B 382 382 . | 0.0285 | 0.0283 | 0.0318 | -0.0031 | -0.0045 |   |
| 0.0044 | 1   | .   |                             |        |        |        |         |         |   |
| 6221   | CB  | CB  | . ASP ASP ASP B B 382 382 . | 0.0292 | 0.0315 | 0.0300 | -0.0049 | -0.0043 |   |
| 0.0053 | 1   | .   |                             |        |        |        |         |         |   |
| 6222   | CG  | CG  | . ASP ASP ASP B B 382 382 . | 0.0713 | 0.0594 | 0.0829 | -0.0084 | -0.0011 |   |
| 0.0125 | 1   | .   |                             |        |        |        |         |         |   |





|        |     |     |                             |        |        |        |         |         |   |
|--------|-----|-----|-----------------------------|--------|--------|--------|---------|---------|---|
| 6253   | N   | N   | . LEU LEU LEU B B 387 387 . | 0.0307 | 0.0354 | 0.0292 | -0.0071 | -0.0044 |   |
| 0.0062 | 1   | .   |                             |        |        |        |         |         |   |
| 6254   | CA  | CA  | . LEU LEU LEU B B 387 387 . | 0.0471 | 0.0313 | 0.0352 | -0.0035 | -0.0082 |   |
| 0.0074 | 1   | .   |                             |        |        |        |         |         |   |
| 6255   | CB  | CB  | . LEU LEU LEU B B 387 387 . | 0.0253 | 0.0253 | 0.0253 | 0.0000  | 0.0000  |   |
| 0.0000 | 1   | .   |                             |        |        |        |         |         |   |
| 6256   | CG  | CG  | . LEU LEU LEU B B 387 387 . | 0.0332 | 0.0300 | 0.0321 | -0.0061 | 0.0073  | - |
| 0.0056 | 1   | .   |                             |        |        |        |         |         |   |
| 6257   | CD1 | CD1 | . LEU LEU LEU B B 387 387 . | 0.0386 | 0.0448 | 0.0256 | -0.0160 | -0.0020 |   |
| 0.0025 | 1   | .   |                             |        |        |        |         |         |   |
| 6258   | CD2 | CD2 | . LEU LEU LEU B B 387 387 . | 0.0417 | 0.0296 | 0.0527 | 0.0082  | -0.0048 | - |
| 0.0001 | 1   | .   |                             |        |        |        |         |         |   |
| 6259   | C   | C   | . LEU LEU LEU B B 387 387 . | 0.0464 | 0.0416 | 0.0462 | 0.0042  | 0.0017  |   |
| 0.0043 | 1   | .   |                             |        |        |        |         |         |   |
| 6260   | O   | O   | . LEU LEU LEU B B 387 387 . | 0.0571 | 0.0613 | 0.0407 | 0.0027  | -0.0221 | - |
| 0.0019 | 1   | .   |                             |        |        |        |         |         |   |
| 6261   | N   | N   | . CYS CYS CYS B B 388 388 . | 0.0587 | 0.0396 | 0.0544 | 0.0081  | -0.0027 |   |
| 0.0032 | 1   | .   |                             |        |        |        |         |         |   |
| 6262   | CA  | CA  | . CYS CYS CYS B B 388 388 . | 0.0954 | 0.0781 | 0.0798 | -0.0032 | -0.0047 |   |
| 0.0043 | 1   | .   |                             |        |        |        |         |         |   |
| 6263   | CB  | CB  | . CYS CYS CYS B B 388 388 . | 0.1263 | 0.1082 | 0.1133 | 0.0116  | -0.0022 | - |
| 0.0111 | 1   | .   |                             |        |        |        |         |         |   |
| 6264   | SG  | SG  | . CYS CYS CYS B B 388 388 . | 0.3003 | 0.2318 | 0.2773 | -0.0109 | -0.0250 |   |
| 0.0078 | 1   | .   |                             |        |        |        |         |         |   |
| 6265   | C   | C   | . CYS CYS CYS B B 388 388 . | 0.0878 | 0.0894 | 0.0834 | 0.0001  | 0.0017  | - |
| 0.0085 | 1   | .   |                             |        |        |        |         |         |   |
| 6266   | O   | O   | . CYS CYS CYS B B 388 388 . | 0.1512 | 0.1414 | 0.1015 | -0.0107 | -0.0105 |   |
| 0.0090 | 1   | .   |                             |        |        |        |         |         |   |
| 6267   | N   | N   | . THR THR THR B B 389 389 . | 0.0597 | 0.0495 | 0.0483 | -0.0067 | -0.0044 | - |
| 0.0004 | 1   | .   |                             |        |        |        |         |         |   |
| 6268   | CA  | CA  | . THR THR THR B B 389 389 . | 0.0574 | 0.0449 | 0.0456 | -0.0075 | -0.0079 | - |
| 0.0065 | 1   | .   |                             |        |        |        |         |         |   |
| 6269   | CB  | CB  | . THR THR THR B B 389 389 . | 0.0529 | 0.0300 | 0.0588 | 0.0008  | -0.0045 | - |
| 0.0125 | 1   | .   |                             |        |        |        |         |         |   |
| 6270   | OG1 | OG1 | . THR THR THR B B 389 389 . | 0.0678 | 0.0486 | 0.0403 | -0.0049 | -0.0001 | - |
| 0.0170 | 1   | .   |                             |        |        |        |         |         |   |
| 6271   | CG2 | CG2 | . THR THR THR B B 389 389 . | 0.0873 | 0.0645 | 0.0597 | -0.0068 | -0.0133 |   |
| 0.0172 | 1   | .   |                             |        |        |        |         |         |   |
| 6272   | C   | C   | . THR THR THR B B 389 389 . | 0.0472 | 0.0359 | 0.0376 | -0.0016 | -0.0057 |   |
| 0.0083 | 1   | .   |                             |        |        |        |         |         |   |
| 6273   | O   | O   | . THR THR THR B B 389 389 . | 0.0735 | 0.0530 | 0.0626 | -0.0131 | 0.0000  | - |
| 0.0071 | 1   | .   |                             |        |        |        |         |         |   |
| 6274   | N   | N   | . GLY GLY GLY B B 390 390 . | 0.0328 | 0.0260 | 0.0283 | -0.0023 | -0.0047 |   |
| 0.0015 | 1   | .   |                             |        |        |        |         |         |   |
| 6275   | CA  | CA  | . GLY GLY GLY B B 390 390 . | 0.0323 | 0.0281 | 0.0267 | -0.0043 | -0.0030 |   |
| 0.0020 | 1   | .   |                             |        |        |        |         |         |   |
| 6276   | C   | C   | . GLY GLY GLY B B 390 390 . | 0.0253 | 0.0253 | 0.0253 | 0.0000  | 0.0000  |   |
| 0.0000 | 1   | .   |                             |        |        |        |         |         |   |
| 6277   | O   | O   | . GLY GLY GLY B B 390 390 . | 0.0253 | 0.0253 | 0.0253 | 0.0000  | 0.0000  |   |
| 0.0000 | 1   | .   |                             |        |        |        |         |         |   |
| 6278   | N   | N   | . GLN GLN GLN B B 391 391 . | 0.0253 | 0.0253 | 0.0253 | 0.0000  | 0.0000  |   |
| 0.0000 | 1   | .   |                             |        |        |        |         |         |   |
| 6279   | CA  | CA  | . GLN GLN GLN B B 391 391 . | 0.0253 | 0.0253 | 0.0253 | 0.0000  | 0.0000  |   |
| 0.0000 | 1   | .   |                             |        |        |        |         |         |   |
| 6280   | CB  | CB  | . GLN GLN GLN B B 391 391 . | 0.0539 | 0.0721 | 0.0433 | -0.0082 | -0.0044 |   |
| 0.0125 | 1   | .   |                             |        |        |        |         |         |   |
| 6281   | CG  | CG  | . GLN GLN GLN B B 391 391 . | 0.0712 | 0.0449 | 0.0956 | 0.0077  | 0.0079  |   |
| 0.0083 | 1   | .   |                             |        |        |        |         |         |   |
| 6282   | CD  | CD  | . GLN GLN GLN B B 391 391 . | 0.0431 | 0.0448 | 0.0506 | 0.0044  | -0.0054 |   |
| 0.0195 | 1   | .   |                             |        |        |        |         |         |   |



|        |     |     |                             |        |        |        |         |         |   |
|--------|-----|-----|-----------------------------|--------|--------|--------|---------|---------|---|
| 6313   | C   | C   | . GLY GLY GLY B B 395 395 . | 0.0253 | 0.0253 | 0.0253 | 0.0000  | 0.0000  |   |
| 0.0000 | 1   | .   |                             |        |        |        |         |         |   |
| 6314   | O   | O   | . GLY GLY GLY B B 395 395 . | 0.0253 | 0.0253 | 0.0253 | 0.0000  | 0.0000  |   |
| 0.0000 | 1   | .   |                             |        |        |        |         |         |   |
| 6315   | N   | N   | . ALA ALA ALA B B 396 396 . | 0.0253 | 0.0253 | 0.0253 | 0.0000  | 0.0000  |   |
| 0.0000 | 1   | .   |                             |        |        |        |         |         |   |
| 6316   | CA  | CA  | . ALA ALA ALA B B 396 396 . | 0.0253 | 0.0253 | 0.0253 | 0.0000  | 0.0000  |   |
| 0.0000 | 1   | .   |                             |        |        |        |         |         |   |
| 6317   | CB  | CB  | . ALA ALA ALA B B 396 396 . | 0.0253 | 0.0253 | 0.0253 | 0.0000  | 0.0000  |   |
| 0.0000 | 1   | .   |                             |        |        |        |         |         |   |
| 6318   | C   | C   | . ALA ALA ALA B B 396 396 . | 0.0253 | 0.0253 | 0.0253 | 0.0000  | 0.0000  |   |
| 0.0000 | 1   | .   |                             |        |        |        |         |         |   |
| 6319   | O   | O   | . ALA ALA ALA B B 396 396 . | 0.0253 | 0.0253 | 0.0253 | 0.0000  | 0.0000  |   |
| 0.0000 | 1   | .   |                             |        |        |        |         |         |   |
| 6320   | N   | N   | . PRO PRO PRO B B 397 397 . | 0.0253 | 0.0253 | 0.0253 | 0.0000  | 0.0000  |   |
| 0.0000 | 1   | .   |                             |        |        |        |         |         |   |
| 6321   | CA  | CA  | . PRO PRO PRO B B 397 397 . | 0.0253 | 0.0253 | 0.0253 | 0.0000  | 0.0000  |   |
| 0.0000 | 1   | .   |                             |        |        |        |         |         |   |
| 6322   | CB  | CB  | . PRO PRO PRO B B 397 397 . | 0.0253 | 0.0254 | 0.0259 | 0.0000  | 0.0000  | - |
| 0.0002 | 1   | .   |                             |        |        |        |         |         |   |
| 6323   | CG  | CG  | . PRO PRO PRO B B 397 397 . | 0.0253 | 0.0253 | 0.0253 | 0.0000  | 0.0000  |   |
| 0.0000 | 1   | .   |                             |        |        |        |         |         |   |
| 6324   | CD  | CD  | . PRO PRO PRO B B 397 397 . | 0.0269 | 0.0256 | 0.0260 | 0.0006  | 0.0010  |   |
| 0.0004 | 1   | .   |                             |        |        |        |         |         |   |
| 6325   | C   | C   | . PRO PRO PRO B B 397 397 . | 0.0253 | 0.0254 | 0.0256 | 0.0000  | 0.0000  |   |
| 0.0001 | 1   | .   |                             |        |        |        |         |         |   |
| 6326   | O   | O   | . PRO PRO PRO B B 397 397 . | 0.0253 | 0.0253 | 0.0253 | 0.0000  | 0.0000  |   |
| 0.0000 | 1   | .   |                             |        |        |        |         |         |   |
| 6327   | N   | N   | . CYS CYS CYS B B 398 398 . | 0.0253 | 0.0253 | 0.0253 | 0.0000  | 0.0000  |   |
| 0.0000 | 1   | .   |                             |        |        |        |         |         |   |
| 6328   | CA  | CA  | . CYS CYS CYS B B 398 398 . | 0.0253 | 0.0253 | 0.0253 | 0.0000  | 0.0000  |   |
| 0.0000 | 1   | .   |                             |        |        |        |         |         |   |
| 6329   | CB  | CB  | . CYS CYS CYS B B 398 398 . | 0.0253 | 0.0253 | 0.0253 | 0.0000  | 0.0000  |   |
| 0.0000 | 1   | .   |                             |        |        |        |         |         |   |
| 6330   | SG  | SG  | . CYS CYS CYS B B 398 398 . | 0.0314 | 0.0255 | 0.0263 | -0.0012 | 0.0025  | - |
| 0.0005 | 1   | .   |                             |        |        |        |         |         |   |
| 6331   | C   | C   | . CYS CYS CYS B B 398 398 . | 0.0253 | 0.0253 | 0.0253 | 0.0000  | 0.0000  |   |
| 0.0000 | 1   | .   |                             |        |        |        |         |         |   |
| 6332   | O   | O   | . CYS CYS CYS B B 398 398 . | 0.0271 | 0.0259 | 0.0253 | 0.0010  | -0.0002 | - |
| 0.0001 | 1   | .   |                             |        |        |        |         |         |   |
| 6333   | N   | N   | . ARG ARG ARG B B 399 399 . | 0.0253 | 0.0253 | 0.0253 | 0.0000  | 0.0000  |   |
| 0.0000 | 1   | .   |                             |        |        |        |         |         |   |
| 6334   | CA  | CA  | . ARG ARG ARG B B 399 399 . | 0.0253 | 0.0253 | 0.0253 | 0.0000  | 0.0000  |   |
| 0.0000 | 1   | .   |                             |        |        |        |         |         |   |
| 6335   | CB  | CB  | . ARG ARG ARG B B 399 399 . | 0.0253 | 0.0253 | 0.0253 | 0.0000  | 0.0000  |   |
| 0.0000 | 1   | .   |                             |        |        |        |         |         |   |
| 6336   | CG  | CG  | . ARG ARG ARG B B 399 399 . | 0.0253 | 0.0253 | 0.0253 | 0.0000  | 0.0000  |   |
| 0.0000 | 1   | .   |                             |        |        |        |         |         |   |
| 6337   | CD  | CD  | . ARG ARG ARG B B 399 399 . | 0.0282 | 0.0253 | 0.0337 | 0.0004  | 0.0049  |   |
| 0.0006 | 1   | .   |                             |        |        |        |         |         |   |
| 6338   | NE  | NE  | . ARG ARG ARG B B 399 399 . | 0.0253 | 0.0253 | 0.0253 | 0.0000  | 0.0000  |   |
| 0.0000 | 1   | .   |                             |        |        |        |         |         |   |
| 6339   | CZ  | CZ  | . ARG ARG ARG B B 399 399 . | 0.0253 | 0.0253 | 0.0253 | 0.0000  | 0.0000  |   |
| 0.0000 | 1   | .   |                             |        |        |        |         |         |   |
| 6340   | NH1 | NH1 | . ARG ARG ARG B B 399 399 . | 0.0253 | 0.0253 | 0.0253 | 0.0000  | 0.0000  |   |
| 0.0000 | 1   | .   |                             |        |        |        |         |         |   |
| 6341   | NH2 | NH2 | . ARG ARG ARG B B 399 399 . | 0.0253 | 0.0253 | 0.0253 | 0.0000  | 0.0000  |   |
| 0.0000 | 1   | .   |                             |        |        |        |         |         |   |
| 6342   | C   | C   | . ARG ARG ARG B B 399 399 . | 0.0253 | 0.0253 | 0.0253 | 0.0000  | 0.0000  |   |
| 0.0000 | 1   | .   |                             |        |        |        |         |         |   |



|        |     |     |                             |        |        |        |         |         |  |
|--------|-----|-----|-----------------------------|--------|--------|--------|---------|---------|--|
| 6373   | CG  | CG  | . LEU LEU LEU B B 403 403 . | 0.0292 | 0.0299 | 0.0253 | -0.0042 | 0.0000  |  |
| 0.0000 | 1   | .   |                             |        |        |        |         |         |  |
| 6374   | CD1 | CD1 | . LEU LEU LEU B B 403 403 . | 0.0253 | 0.0253 | 0.0253 | 0.0000  | 0.0000  |  |
| 0.0000 | 1   | .   |                             |        |        |        |         |         |  |
| 6375   | CD2 | CD2 | . LEU LEU LEU B B 403 403 . | 0.0255 | 0.0253 | 0.0257 | 0.0000  | -0.0003 |  |
| 0.0000 | 1   | .   |                             |        |        |        |         |         |  |
| 6376   | C   | C   | . LEU LEU LEU B B 403 403 . | 0.0253 | 0.0253 | 0.0253 | 0.0000  | 0.0000  |  |
| 0.0000 | 1   | .   |                             |        |        |        |         |         |  |
| 6377   | O   | O   | . LEU LEU LEU B B 403 403 . | 0.0253 | 0.0253 | 0.0253 | 0.0000  | 0.0000  |  |
| 0.0000 | 1   | .   |                             |        |        |        |         |         |  |
| 6378   | N   | N   | . ALA ALA ALA B B 404 404 . | 0.0253 | 0.0253 | 0.0253 | 0.0000  | 0.0000  |  |
| 0.0000 | 1   | .   |                             |        |        |        |         |         |  |
| 6379   | CA  | CA  | . ALA ALA ALA B B 404 404 . | 0.0253 | 0.0253 | 0.0253 | 0.0000  | 0.0000  |  |
| 0.0000 | 1   | .   |                             |        |        |        |         |         |  |
| 6380   | CB  | CB  | . ALA ALA ALA B B 404 404 . | 0.0253 | 0.0253 | 0.0253 | 0.0000  | 0.0000  |  |
| 0.0000 | 1   | .   |                             |        |        |        |         |         |  |
| 6381   | C   | C   | . ALA ALA ALA B B 404 404 . | 0.0253 | 0.0253 | 0.0253 | 0.0000  | 0.0000  |  |
| 0.0000 | 1   | .   |                             |        |        |        |         |         |  |
| 6382   | O   | O   | . ALA ALA ALA B B 404 404 . | 0.0253 | 0.0253 | 0.0253 | 0.0000  | 0.0000  |  |
| 0.0000 | 1   | .   |                             |        |        |        |         |         |  |
| 6383   | N   | N   | . LYS LYS LYS B B 405 405 . | 0.0253 | 0.0253 | 0.0253 | 0.0000  | 0.0000  |  |
| 0.0000 | 1   | .   |                             |        |        |        |         |         |  |
| 6384   | CA  | CA  | . LYS LYS LYS B B 405 405 . | 0.0253 | 0.0253 | 0.0253 | 0.0000  | 0.0000  |  |
| 0.0000 | 1   | .   |                             |        |        |        |         |         |  |
| 6385   | CB  | CB  | . LYS LYS LYS B B 405 405 . | 0.0253 | 0.0253 | 0.0253 | 0.0000  | 0.0000  |  |
| 0.0000 | 1   | .   |                             |        |        |        |         |         |  |
| 6386   | CG  | CG  | . LYS LYS LYS B B 405 405 . | 0.0253 | 0.0253 | 0.0253 | 0.0000  | 0.0000  |  |
| 0.0000 | 1   | .   |                             |        |        |        |         |         |  |
| 6387   | CD  | CD  | . LYS LYS LYS B B 405 405 . | 0.0253 | 0.0253 | 0.0253 | 0.0000  | 0.0000  |  |
| 0.0000 | 1   | .   |                             |        |        |        |         |         |  |
| 6388   | CE  | CE  | . LYS LYS LYS B B 405 405 . | 0.0253 | 0.0253 | 0.0253 | 0.0000  | 0.0000  |  |
| 0.0000 | 1   | .   |                             |        |        |        |         |         |  |
| 6389   | NZ  | NZ  | . LYS LYS LYS B B 405 405 . | 0.0253 | 0.0253 | 0.0253 | 0.0000  | 0.0000  |  |
| 0.0000 | 1   | .   |                             |        |        |        |         |         |  |
| 6390   | C   | C   | . LYS LYS LYS B B 405 405 . | 0.0253 | 0.0253 | 0.0253 | 0.0000  | 0.0000  |  |
| 0.0000 | 1   | .   |                             |        |        |        |         |         |  |
| 6391   | O   | O   | . LYS LYS LYS B B 405 405 . | 0.0253 | 0.0253 | 0.0253 | 0.0000  | 0.0000  |  |
| 0.0000 | 1   | .   |                             |        |        |        |         |         |  |
| 6392   | N   | N   | . TYR TYR TYR B B 406 406 . | 0.0253 | 0.0253 | 0.0253 | 0.0000  | 0.0000  |  |
| 0.0000 | 1   | .   |                             |        |        |        |         |         |  |
| 6393   | CA  | CA  | . TYR TYR TYR B B 406 406 . | 0.0253 | 0.0253 | 0.0253 | 0.0000  | 0.0000  |  |
| 0.0000 | 1   | .   |                             |        |        |        |         |         |  |
| 6394   | CB  | CB  | . TYR TYR TYR B B 406 406 . | 0.0253 | 0.0253 | 0.0253 | 0.0000  | 0.0000  |  |
| 0.0000 | 1   | .   |                             |        |        |        |         |         |  |
| 6395   | CG  | CG  | . TYR TYR TYR B B 406 406 . | 0.0253 | 0.0253 | 0.0253 | 0.0000  | 0.0000  |  |
| 0.0000 | 1   | .   |                             |        |        |        |         |         |  |
| 6396   | CD1 | CD1 | . TYR TYR TYR B B 406 406 . | 0.0253 | 0.0253 | 0.0253 | 0.0000  | 0.0000  |  |
| 0.0000 | 1   | .   |                             |        |        |        |         |         |  |
| 6397   | CE1 | CE1 | . TYR TYR TYR B B 406 406 . | 0.0253 | 0.0253 | 0.0253 | 0.0000  | 0.0000  |  |
| 0.0000 | 1   | .   |                             |        |        |        |         |         |  |
| 6398   | CZ  | CZ  | . TYR TYR TYR B B 406 406 . | 0.0253 | 0.0253 | 0.0254 | 0.0000  | 0.0000  |  |
| 0.0000 | 1   | .   |                             |        |        |        |         |         |  |
| 6399   | OH  | OH  | . TYR TYR TYR B B 406 406 . | 0.0253 | 0.0253 | 0.0253 | 0.0000  | 0.0000  |  |
| 0.0000 | 1   | .   |                             |        |        |        |         |         |  |
| 6400   | CE2 | CE2 | . TYR TYR TYR B B 406 406 . | 0.0253 | 0.0253 | 0.0253 | 0.0000  | 0.0000  |  |
| 0.0000 | 1   | .   |                             |        |        |        |         |         |  |
| 6401   | CD2 | CD2 | . TYR TYR TYR B B 406 406 . | 0.0253 | 0.0253 | 0.0253 | 0.0000  | 0.0000  |  |
| 0.0000 | 1   | .   |                             |        |        |        |         |         |  |
| 6402   | C   | C   | . TYR TYR TYR B B 406 406 . | 0.0253 | 0.0253 | 0.0253 | 0.0000  | 0.0000  |  |
| 0.0000 | 1   | .   |                             |        |        |        |         |         |  |

|        |     |     |                             |        |        |        |         |         |   |
|--------|-----|-----|-----------------------------|--------|--------|--------|---------|---------|---|
| 6403   | O   | O   | . TYR TYR TYR B B 406 406 . | 0.0253 | 0.0253 | 0.0253 | 0.0000  | 0.0000  |   |
| 0.0000 | 1   | .   |                             |        |        |        |         |         |   |
| 6404   | N   | N   | . ASN ASN ASN B B 407 407 . | 0.0253 | 0.0253 | 0.0253 | 0.0000  | 0.0000  |   |
| 0.0000 | 1   | .   |                             |        |        |        |         |         |   |
| 6405   | CA  | CA  | . ASN ASN ASN B B 407 407 . | 0.0253 | 0.0253 | 0.0253 | 0.0000  | 0.0000  |   |
| 0.0000 | 1   | .   |                             |        |        |        |         |         |   |
| 6406   | CB  | CB  | . ASN ASN ASN B B 407 407 . | 0.0253 | 0.0253 | 0.0253 | 0.0000  | 0.0000  |   |
| 0.0000 | 1   | .   |                             |        |        |        |         |         |   |
| 6407   | CG  | CG  | . ASN ASN ASN B B 407 407 . | 0.0253 | 0.0253 | 0.0253 | 0.0000  | 0.0000  |   |
| 0.0000 | 1   | .   |                             |        |        |        |         |         |   |
| 6408   | OD1 | OD1 | . ASN ASN ASN B B 407 407 . | 0.0253 | 0.0253 | 0.0253 | 0.0000  | 0.0000  |   |
| 0.0000 | 1   | .   |                             |        |        |        |         |         |   |
| 6409   | ND2 | ND2 | . ASN ASN ASN B B 407 407 . | 0.0253 | 0.0253 | 0.0253 | 0.0000  | 0.0000  |   |
| 0.0000 | 1   | .   |                             |        |        |        |         |         |   |
| 6410   | C   | C   | . ASN ASN ASN B B 407 407 . | 0.0253 | 0.0253 | 0.0253 | 0.0000  | 0.0000  |   |
| 0.0000 | 1   | .   |                             |        |        |        |         |         |   |
| 6411   | O   | O   | . ASN ASN ASN B B 407 407 . | 0.0253 | 0.0253 | 0.0253 | 0.0000  | 0.0000  |   |
| 0.0000 | 1   | .   |                             |        |        |        |         |         |   |
| 6412   | N   | N   | . GLN GLN GLN B B 408 408 . | 0.0253 | 0.0253 | 0.0253 | 0.0000  | 0.0000  |   |
| 0.0000 | 1   | .   |                             |        |        |        |         |         |   |
| 6413   | CA  | CA  | . GLN GLN GLN B B 408 408 . | 0.0253 | 0.0253 | 0.0253 | 0.0000  | 0.0000  |   |
| 0.0000 | 1   | .   |                             |        |        |        |         |         |   |
| 6414   | CB  | CB  | . GLN GLN GLN B B 408 408 . | 0.0253 | 0.0253 | 0.0253 | 0.0000  | 0.0000  |   |
| 0.0000 | 1   | .   |                             |        |        |        |         |         |   |
| 6415   | CG  | CG  | . GLN GLN GLN B B 408 408 . | 0.0258 | 0.0253 | 0.0269 | -0.0001 | 0.0009  | - |
| 0.0002 | 1   | .   |                             |        |        |        |         |         |   |
| 6416   | CD  | CD  | . GLN GLN GLN B B 408 408 . | 0.0323 | 0.0500 | 0.0372 | 0.0131  | 0.0091  |   |
| 0.0172 | 1   | .   |                             |        |        |        |         |         |   |
| 6417   | OE1 | OE1 | . GLN GLN GLN B B 408 408 . | 0.0310 | 0.0352 | 0.0421 | 0.0067  | 0.0058  |   |
| 0.0115 | 1   | .   |                             |        |        |        |         |         |   |
| 6418   | NE2 | NE2 | . GLN GLN GLN B B 408 408 . | 0.0479 | 0.0499 | 0.0412 | -0.0210 | -0.0013 |   |
| 0.0101 | 1   | .   |                             |        |        |        |         |         |   |
| 6419   | C   | C   | . GLN GLN GLN B B 408 408 . | 0.0253 | 0.0253 | 0.0253 | 0.0000  | 0.0000  |   |
| 0.0000 | 1   | .   |                             |        |        |        |         |         |   |
| 6420   | O   | O   | . GLN GLN GLN B B 408 408 . | 0.0253 | 0.0253 | 0.0253 | 0.0000  | 0.0000  |   |
| 0.0000 | 1   | .   |                             |        |        |        |         |         |   |
| 6421   | N   | N   | . LEU LEU LEU B B 409 409 . | 0.0253 | 0.0253 | 0.0253 | 0.0000  | 0.0000  |   |
| 0.0000 | 1   | .   |                             |        |        |        |         |         |   |
| 6422   | CA  | CA  | . LEU LEU LEU B B 409 409 . | 0.0253 | 0.0253 | 0.0253 | 0.0000  | 0.0000  |   |
| 0.0000 | 1   | .   |                             |        |        |        |         |         |   |
| 6423   | CB  | CB  | . LEU LEU LEU B B 409 409 . | 0.0281 | 0.0269 | 0.0261 | 0.0021  | 0.0015  |   |
| 0.0011 | 1   | .   |                             |        |        |        |         |         |   |
| 6424   | CG  | CG  | . LEU LEU LEU B B 409 409 . | 0.0267 | 0.0255 | 0.0257 | 0.0005  | 0.0007  |   |
| 0.0002 | 1   | .   |                             |        |        |        |         |         |   |
| 6425   | CD1 | CD1 | . LEU LEU LEU B B 409 409 . | 0.0253 | 0.0253 | 0.0253 | 0.0000  | 0.0000  |   |
| 0.0000 | 1   | .   |                             |        |        |        |         |         |   |
| 6426   | CD2 | CD2 | . LEU LEU LEU B B 409 409 . | 0.0305 | 0.0366 | 0.0313 | -0.0024 | -0.0025 |   |
| 0.0081 | 1   | .   |                             |        |        |        |         |         |   |
| 6427   | C   | C   | . LEU LEU LEU B B 409 409 . | 0.0253 | 0.0253 | 0.0253 | 0.0000  | 0.0000  |   |
| 0.0000 | 1   | .   |                             |        |        |        |         |         |   |
| 6428   | O   | O   | . LEU LEU LEU B B 409 409 . | 0.0253 | 0.0253 | 0.0253 | 0.0000  | 0.0000  |   |
| 0.0000 | 1   | .   |                             |        |        |        |         |         |   |
| 6429   | N   | N   | . MET MET MET B B 410 410 . | 0.0253 | 0.0253 | 0.0253 | 0.0000  | 0.0000  |   |
| 0.0000 | 1   | .   |                             |        |        |        |         |         |   |
| 6430   | CA  | CA  | . MET MET MET B B 410 410 . | 0.0253 | 0.0253 | 0.0253 | 0.0000  | 0.0000  |   |
| 0.0000 | 1   | .   |                             |        |        |        |         |         |   |
| 6431   | CB  | CB  | . MET MET MET B B 410 410 . | 0.0381 | 0.0275 | 0.0307 | 0.0052  | -0.0047 | - |
| 0.0019 | 1   | .   |                             |        |        |        |         |         |   |
| 6432   | CG  | CG  | . MET MET MET B B 410 410 . | 0.0356 | 0.0381 | 0.0383 | 0.0072  | 0.0035  | - |
| 0.0070 | 1   | .   |                             |        |        |        |         |         |   |





|        |     |     |                             |        |        |        |         |         |   |
|--------|-----|-----|-----------------------------|--------|--------|--------|---------|---------|---|
| 6463   | C   | C   | . GLU GLU GLU B B 413 413 . | 0.0553 | 0.0287 | 0.0311 | -0.0098 | -0.0058 |   |
| 0.0008 | 1   | .   |                             |        |        |        |         |         |   |
| 6464   | O   | O   | . GLU GLU GLU B B 413 413 . | 0.0627 | 0.0379 | 0.0304 | -0.0217 | -0.0138 |   |
| 0.0080 | 1   | .   |                             |        |        |        |         |         |   |
| 6465   | N   | N   | . GLU GLU GLU B B 414 414 . | 0.0456 | 0.0272 | 0.0292 | -0.0023 | -0.0039 |   |
| 0.0027 | 1   | .   |                             |        |        |        |         |         |   |
| 6466   | CA  | CA  | . GLU GLU GLU B B 414 414 . | 0.0697 | 0.0466 | 0.0712 | -0.0138 | 0.0081  |   |
| 0.0030 | 1   | .   |                             |        |        |        |         |         |   |
| 6467   | CB  | CB  | . GLU GLU GLU B B 414 414 . | 0.0818 | 0.0600 | 0.0605 | -0.0115 | 0.0042  |   |
| 0.0154 | 1   | .   |                             |        |        |        |         |         |   |
| 6468   | CG  | CG  | . GLU GLU GLU B B 414 414 . | 0.1589 | 0.1027 | 0.1204 | -0.0193 | 0.0052  |   |
| 0.0095 | 1   | .   |                             |        |        |        |         |         |   |
| 6469   | CD  | CD  | . GLU GLU GLU B B 414 414 . | 0.1838 | 0.1684 | 0.1670 | 0.0023  | -0.0195 |   |
| 0.0026 | 1   | .   |                             |        |        |        |         |         |   |
| 6470   | OE1 | OE1 | . GLU GLU GLU B B 414 414 . | 0.1763 | 0.1809 | 0.1658 | -0.0049 | -0.0033 | - |
| 0.0288 | 1   | .   |                             |        |        |        |         |         |   |
| 6471   | OE2 | OE2 | . GLU GLU GLU B B 414 414 . | 0.1819 | 0.2171 | 0.1680 | -0.0296 | -0.0177 | - |
| 0.0072 | 1   | .   |                             |        |        |        |         |         |   |
| 6472   | C   | C   | . GLU GLU GLU B B 414 414 . | 0.0768 | 0.0684 | 0.0695 | 0.0041  | -0.0088 |   |
| 0.0031 | 1   | .   |                             |        |        |        |         |         |   |
| 6473   | O   | O   | . GLU GLU GLU B B 414 414 . | 0.1226 | 0.0797 | 0.1178 | -0.0156 | 0.0010  | - |
| 0.0070 | 1   | .   |                             |        |        |        |         |         |   |
| 6474   | N   | N   | . GLU GLU GLU B B 415 415 . | 0.1156 | 0.0803 | 0.0855 | 0.0013  | -0.0009 |   |
| 0.0033 | 1   | .   |                             |        |        |        |         |         |   |
| 6475   | CA  | CA  | . GLU GLU GLU B B 415 415 . | 0.1319 | 0.1285 | 0.1218 | 0.0034  | -0.0031 |   |
| 0.0019 | 1   | .   |                             |        |        |        |         |         |   |
| 6476   | CB  | CB  | . GLU GLU GLU B B 415 415 . | 0.1703 | 0.1641 | 0.1658 | 0.0085  | 0.0001  | - |
| 0.0034 | 1   | .   |                             |        |        |        |         |         |   |
| 6477   | CG  | CG  | . GLU GLU GLU B B 415 415 . | 0.2450 | 0.2852 | 0.2334 | -0.0109 | -0.0101 | - |
| 0.0081 | 1   | .   |                             |        |        |        |         |         |   |
| 6478   | CD  | CD  | . GLU GLU GLU B B 415 415 . | 0.4073 | 0.3771 | 0.4088 | 0.0309  | 0.0063  | - |
| 0.0130 | 1   | .   |                             |        |        |        |         |         |   |
| 6479   | OE1 | OE1 | . GLU GLU GLU B B 415 415 . | 0.4383 | 0.4425 | 0.4070 | 0.0229  | -0.0160 | - |
| 0.0278 | 1   | .   |                             |        |        |        |         |         |   |
| 6480   | OE2 | OE2 | . GLU GLU GLU B B 415 415 . | 0.4412 | 0.4143 | 0.4633 | 0.0344  | -0.0114 |   |
| 0.0301 | 1   | .   |                             |        |        |        |         |         |   |
| 6481   | C   | C   | . GLU GLU GLU B B 415 415 . | 0.1443 | 0.1439 | 0.1305 | -0.0067 | -0.0017 |   |
| 0.0075 | 1   | .   |                             |        |        |        |         |         |   |
| 6482   | O   | O   | . GLU GLU GLU B B 415 415 . | 0.1409 | 0.1430 | 0.1205 | -0.0033 | -0.0007 |   |
| 0.0230 | 1   | .   |                             |        |        |        |         |         |   |
| 6483   | N   | N   | . LEU LEU LEU B B 416 416 . | 0.1459 | 0.1320 | 0.1274 | -0.0094 | 0.0071  | - |
| 0.0074 | 1   | .   |                             |        |        |        |         |         |   |
| 6484   | CA  | CA  | . LEU LEU LEU B B 416 416 . | 0.1416 | 0.1421 | 0.1230 | -0.0012 | -0.0055 |   |
| 0.0021 | 1   | .   |                             |        |        |        |         |         |   |
| 6485   | CB  | CB  | . LEU LEU LEU B B 416 416 . | 0.1753 | 0.1293 | 0.1204 | 0.0035  | -0.0034 |   |
| 0.0036 | 1   | .   |                             |        |        |        |         |         |   |
| 6486   | CG  | CG  | . LEU LEU LEU B B 416 416 . | 0.1609 | 0.1180 | 0.1503 | 0.0058  | -0.0093 |   |
| 0.0145 | 1   | .   |                             |        |        |        |         |         |   |
| 6487   | CD1 | CD1 | . LEU LEU LEU B B 416 416 . | 0.1202 | 0.1793 | 0.0888 | -0.0046 | -0.0286 |   |
| 0.0210 | 1   | .   |                             |        |        |        |         |         |   |
| 6488   | CD2 | CD2 | . LEU LEU LEU B B 416 416 . | 0.1688 | 0.1469 | 0.1642 | -0.0136 | 0.0153  | - |
| 0.0091 | 1   | .   |                             |        |        |        |         |         |   |
| 6489   | C   | C   | . LEU LEU LEU B B 416 416 . | 0.1812 | 0.1691 | 0.1625 | -0.0005 | -0.0127 | - |
| 0.0125 | 1   | .   |                             |        |        |        |         |         |   |
| 6490   | O   | O   | . LEU LEU LEU B B 416 416 . | 0.1856 | 0.1895 | 0.1491 | -0.0186 | -0.0265 | - |
| 0.0002 | 1   | .   |                             |        |        |        |         |         |   |
| 6491   | N   | N   | . GLY GLY GLY B B 417 417 . | 0.2090 | 0.2033 | 0.1994 | 0.0069  | -0.0127 | - |
| 0.0151 | 1   | .   |                             |        |        |        |         |         |   |
| 6492   | CA  | CA  | . GLY GLY GLY B B 417 417 . | 0.2685 | 0.2593 | 0.2721 | 0.0065  | -0.0050 | - |
| 0.0092 | 1   | .   |                             |        |        |        |         |         |   |

|        |     |     |                             |        |        |        |         |         |   |
|--------|-----|-----|-----------------------------|--------|--------|--------|---------|---------|---|
| 6493   | C   | C   | . GLY GLY GLY B B 417 417 . | 0.2990 | 0.3028 | 0.2912 | 0.0003  | -0.0021 | - |
| 0.0014 | 1   | .   |                             |        |        |        |         |         |   |
| 6494   | O   | O   | . GLY GLY GLY B B 417 417 . | 0.2931 | 0.2828 | 0.2771 | -0.0026 | -0.0004 | - |
| 0.0098 | 1   | .   |                             |        |        |        |         |         |   |
| 6495   | N   | N   | . ASP ASP ASP B B 418 418 . | 0.3407 | 0.3298 | 0.3306 | -0.0015 | -0.0020 | - |
| 0.0062 | 1   | .   |                             |        |        |        |         |         |   |
| 6496   | CA  | CA  | . ASP ASP ASP B B 418 418 . | 0.3752 | 0.3703 | 0.3668 | 0.0002  | -0.0024 | - |
| 0.0015 | 1   | .   |                             |        |        |        |         |         |   |
| 6497   | CB  | CB  | . ASP ASP ASP B B 418 418 . | 0.4013 | 0.3948 | 0.3936 | -0.0077 | -0.0112 | - |
| 0.0056 | 1   | .   |                             |        |        |        |         |         |   |
| 6498   | CG  | CG  | . ASP ASP ASP B B 418 418 . | 0.4621 | 0.4530 | 0.4549 | 0.0125  | 0.0032  | - |
| 0.0104 | 1   | .   |                             |        |        |        |         |         |   |
| 6499   | OD1 | OD1 | . ASP ASP ASP B B 418 418 . | 0.5307 | 0.5238 | 0.5209 | 0.0021  | -0.0057 | - |
| 0.0381 | 1   | .   |                             |        |        |        |         |         |   |
| 6500   | OD2 | OD2 | . ASP ASP ASP B B 418 418 . | 0.5133 | 0.4978 | 0.5087 | -0.0068 | -0.0156 | - |
| 0.0166 | 1   | .   |                             |        |        |        |         |         |   |
| 6501   | C   | C   | . ASP ASP ASP B B 418 418 . | 0.3640 | 0.3547 | 0.3613 | -0.0038 | 0.0020  | - |
| 0.0023 | 1   | .   |                             |        |        |        |         |         |   |
| 6502   | O   | O   | . ASP ASP ASP B B 418 418 . | 0.3609 | 0.3529 | 0.3563 | -0.0068 | 0.0108  | - |
| 0.0065 | 1   | .   |                             |        |        |        |         |         |   |
| 6503   | N   | N   | . GLU GLU GLU B B 419 419 . | 0.3507 | 0.3408 | 0.3466 | -0.0011 | -0.0018 | - |
| 0.0021 | 1   | .   |                             |        |        |        |         |         |   |
| 6504   | CA  | CA  | . GLU GLU GLU B B 419 419 . | 0.3392 | 0.3352 | 0.3333 | -0.0043 | -0.0045 | - |
| 0.0009 | 1   | .   |                             |        |        |        |         |         |   |
| 6505   | CB  | CB  | . GLU GLU GLU B B 419 419 . | 0.3513 | 0.3573 | 0.3537 | -0.0029 | -0.0088 | - |
| 0.0010 | 1   | .   |                             |        |        |        |         |         |   |
| 6506   | CG  | CG  | . GLU GLU GLU B B 419 419 . | 0.4305 | 0.4066 | 0.4110 | -0.0015 | -0.0008 | - |
| 0.0021 | 1   | .   |                             |        |        |        |         |         |   |
| 6507   | CD  | CD  | . GLU GLU GLU B B 419 419 . | 0.4775 | 0.5198 | 0.5024 | 0.0164  | 0.0032  | - |
| 0.0023 | 1   | .   |                             |        |        |        |         |         |   |
| 6508   | OE1 | OE1 | . GLU GLU GLU B B 419 419 . | 0.4825 | 0.5247 | 0.5177 | 0.0180  | 0.0222  | - |
| 0.0068 | 1   | .   |                             |        |        |        |         |         |   |
| 6509   | OE2 | OE2 | . GLU GLU GLU B B 419 419 . | 0.5152 | 0.5724 | 0.5215 | 0.0114  | -0.0161 | - |
| 0.0101 | 1   | .   |                             |        |        |        |         |         |   |
| 6510   | C   | C   | . GLU GLU GLU B B 419 419 . | 0.3046 | 0.3086 | 0.3067 | 0.0008  | -0.0035 | - |
| 0.0012 | 1   | .   |                             |        |        |        |         |         |   |
| 6511   | O   | O   | . GLU GLU GLU B B 419 419 . | 0.3090 | 0.2963 | 0.2877 | -0.0085 | -0.0016 | - |
| 0.0042 | 1   | .   |                             |        |        |        |         |         |   |
| 6512   | N   | N   | . ALA ALA ALA B B 420 420 . | 0.2739 | 0.2682 | 0.2597 | -0.0038 | 0.0009  | - |
| 0.0007 | 1   | .   |                             |        |        |        |         |         |   |
| 6513   | CA  | CA  | . ALA ALA ALA B B 420 420 . | 0.2485 | 0.2451 | 0.2373 | 0.0031  | -0.0015 | - |
| 0.0034 | 1   | .   |                             |        |        |        |         |         |   |
| 6514   | CB  | CB  | . ALA ALA ALA B B 420 420 . | 0.2463 | 0.2525 | 0.2340 | -0.0017 | -0.0013 | - |
| 0.0008 | 1   | .   |                             |        |        |        |         |         |   |
| 6515   | C   | C   | . ALA ALA ALA B B 420 420 . | 0.2337 | 0.2243 | 0.2220 | 0.0049  | -0.0017 | - |
| 0.0025 | 1   | .   |                             |        |        |        |         |         |   |
| 6516   | O   | O   | . ALA ALA ALA B B 420 420 . | 0.2564 | 0.2440 | 0.2459 | 0.0080  | -0.0144 | - |
| 0.0033 | 1   | .   |                             |        |        |        |         |         |   |
| 6517   | N   | N   | . ARG ARG ARG B B 421 421 . | 0.2076 | 0.1953 | 0.1785 | -0.0058 | -0.0059 | - |
| 0.0037 | 1   | .   |                             |        |        |        |         |         |   |
| 6518   | CA  | CA  | . ARG ARG ARG B B 421 421 . | 0.1885 | 0.1767 | 0.1911 | -0.0039 | -0.0036 | - |
| 0.0079 | 1   | .   |                             |        |        |        |         |         |   |
| 6519   | CB  | CB  | . ARG ARG ARG B B 421 421 . | 0.2119 | 0.1960 | 0.2131 | -0.0201 | -0.0050 | - |
| 0.0040 | 1   | .   |                             |        |        |        |         |         |   |
| 6520   | CG  | CG  | . ARG ARG ARG B B 421 421 . | 0.2718 | 0.2709 | 0.2863 | 0.0005  | 0.0059  | - |
| 0.0031 | 1   | .   |                             |        |        |        |         |         |   |
| 6521   | CD  | CD  | . ARG ARG ARG B B 421 421 . | 0.4024 | 0.4020 | 0.3661 | -0.0287 | -0.0334 | - |
| 0.0104 | 1   | .   |                             |        |        |        |         |         |   |
| 6522   | NE  | NE  | . ARG ARG ARG B B 421 421 . | 0.4504 | 0.4946 | 0.4783 | 0.0089  | 0.0000  | - |
| 0.0088 | 1   | .   |                             |        |        |        |         |         |   |

|        |     |     |                             |        |        |        |         |         |   |
|--------|-----|-----|-----------------------------|--------|--------|--------|---------|---------|---|
| 6523   | CZ  | CZ  | . ARG ARG ARG B B 421 421 . | 0.5048 | 0.5289 | 0.5230 | -0.0088 | 0.0065  | - |
| 0.0002 | 1   | .   |                             |        |        |        |         |         |   |
| 6524   | NH1 | NH1 | . ARG ARG ARG B B 421 421 . | 0.5442 | 0.5440 | 0.5566 | 0.0145  | -0.0077 | - |
| 0.0036 | 1   | .   |                             |        |        |        |         |         |   |
| 6525   | NH2 | NH2 | . ARG ARG ARG B B 421 421 . | 0.4868 | 0.5273 | 0.5189 | 0.0035  | -0.0081 | - |
| 0.0058 | 1   | .   |                             |        |        |        |         |         |   |
| 6526   | C   | C   | . ARG ARG ARG B B 421 421 . | 0.1331 | 0.1328 | 0.1390 | -0.0030 | 0.0043  | - |
| 0.0063 | 1   | .   |                             |        |        |        |         |         |   |
| 6527   | O   | O   | . ARG ARG ARG B B 421 421 . | 0.1802 | 0.1685 | 0.1902 | 0.0114  | 0.0000  | - |
| 0.0115 | 1   | .   |                             |        |        |        |         |         |   |
| 6528   | N   | N   | . PHE PHE PHE B B 422 422 . | 0.1118 | 0.0767 | 0.0905 | -0.0057 | -0.0011 | - |
| 0.0024 | 1   | .   |                             |        |        |        |         |         |   |
| 6529   | CA  | CA  | . PHE PHE PHE B B 422 422 . | 0.0645 | 0.0608 | 0.0432 | -0.0003 | 0.0073  |   |
| 0.0015 | 1   | .   |                             |        |        |        |         |         |   |
| 6530   | CB  | CB  | . PHE PHE PHE B B 422 422 . | 0.0706 | 0.0615 | 0.0420 | 0.0103  | -0.0050 | - |
| 0.0141 | 1   | .   |                             |        |        |        |         |         |   |
| 6531   | CG  | CG  | . PHE PHE PHE B B 422 422 . | 0.0502 | 0.0368 | 0.0399 | -0.0043 | 0.0009  |   |
| 0.0123 | 1   | .   |                             |        |        |        |         |         |   |
| 6532   | CD1 | CD1 | . PHE PHE PHE B B 422 422 . | 0.0481 | 0.0347 | 0.0355 | 0.0009  | -0.0129 |   |
| 0.0047 | 1   | .   |                             |        |        |        |         |         |   |
| 6533   | CE1 | CE1 | . PHE PHE PHE B B 422 422 . | 0.0283 | 0.0423 | 0.0329 | -0.0056 | 0.0031  | - |
| 0.0006 | 1   | .   |                             |        |        |        |         |         |   |
| 6534   | CZ  | CZ  | . PHE PHE PHE B B 422 422 . | 0.0326 | 0.0253 | 0.0280 | 0.0005  | 0.0044  |   |
| 0.0003 | 1   | .   |                             |        |        |        |         |         |   |
| 6535   | CE2 | CE2 | . PHE PHE PHE B B 422 422 . | 0.0422 | 0.0414 | 0.0253 | -0.0165 | -0.0002 |   |
| 0.0002 | 1   | .   |                             |        |        |        |         |         |   |
| 6536   | CD2 | CD2 | . PHE PHE PHE B B 422 422 . | 0.0321 | 0.0556 | 0.0424 | -0.0057 | 0.0038  | - |
| 0.0146 | 1   | .   |                             |        |        |        |         |         |   |
| 6537   | C   | C   | . PHE PHE PHE B B 422 422 . | 0.0690 | 0.0370 | 0.0496 | 0.0068  | 0.0043  | - |
| 0.0014 | 1   | .   |                             |        |        |        |         |         |   |
| 6538   | O   | O   | . PHE PHE PHE B B 422 422 . | 0.0792 | 0.0783 | 0.0585 | 0.0034  | 0.0060  |   |
| 0.0021 | 1   | .   |                             |        |        |        |         |         |   |
| 6539   | N   | N   | . ALA ALA ALA B B 423 423 . | 0.0726 | 0.0327 | 0.0323 | -0.0066 | 0.0077  |   |
| 0.0050 | 1   | .   |                             |        |        |        |         |         |   |
| 6540   | CA  | CA  | . ALA ALA ALA B B 423 423 . | 0.0455 | 0.0265 | 0.0451 | -0.0028 | -0.0073 |   |
| 0.0047 | 1   | .   |                             |        |        |        |         |         |   |
| 6541   | CB  | CB  | . ALA ALA ALA B B 423 423 . | 0.0441 | 0.0254 | 0.0256 | -0.0015 | 0.0026  | - |
| 0.0002 | 1   | .   |                             |        |        |        |         |         |   |
| 6542   | C   | C   | . ALA ALA ALA B B 423 423 . | 0.0607 | 0.0307 | 0.0371 | 0.0021  | -0.0056 | - |
| 0.0079 | 1   | .   |                             |        |        |        |         |         |   |
| 6543   | O   | O   | . ALA ALA ALA B B 423 423 . | 0.1084 | 0.0694 | 0.0649 | 0.0027  | 0.0065  |   |
| 0.0065 | 1   | .   |                             |        |        |        |         |         |   |
| 6544   | N   | N   | . GLY GLY GLY B B 424 424 . | 0.0475 | 0.0327 | 0.0570 | 0.0005  | 0.0009  | - |
| 0.0014 | 1   | .   |                             |        |        |        |         |         |   |
| 6545   | CA  | CA  | . GLY GLY GLY B B 424 424 . | 0.0683 | 0.0418 | 0.0507 | -0.0077 | 0.0033  | - |
| 0.0044 | 1   | .   |                             |        |        |        |         |         |   |
| 6546   | C   | C   | . GLY GLY GLY B B 424 424 . | 0.0896 | 0.0749 | 0.0546 | 0.0050  | 0.0030  | - |
| 0.0002 | 1   | .   |                             |        |        |        |         |         |   |
| 6547   | O   | O   | . GLY GLY GLY B B 424 424 . | 0.0720 | 0.0500 | 0.0546 | -0.0035 | -0.0050 |   |
| 0.0031 | 1   | .   |                             |        |        |        |         |         |   |
| 6548   | N   | N   | . HIS HIS HIS B B 425 425 . | 0.1221 | 0.1042 | 0.0921 | -0.0011 | 0.0143  | - |
| 0.0027 | 1   | .   |                             |        |        |        |         |         |   |
| 6549   | CA  | CA  | . HIS HIS HIS B B 425 425 . | 0.1412 | 0.1169 | 0.1053 | -0.0034 | 0.0134  |   |
| 0.0000 | 1   | .   |                             |        |        |        |         |         |   |
| 6550   | CB  | CB  | . HIS HIS HIS B B 425 425 . | 0.1597 | 0.1428 | 0.1135 | 0.0068  | 0.0254  | - |
| 0.0047 | 1   | .   |                             |        |        |        |         |         |   |
| 6551   | CG  | CG  | . HIS HIS HIS B B 425 425 . | 0.2117 | 0.2163 | 0.1537 | 0.0076  | 0.0187  |   |
| 0.0074 | 1   | .   |                             |        |        |        |         |         |   |
| 6552   | ND1 | ND1 | . HIS HIS HIS B B 425 425 . | 0.2794 | 0.2630 | 0.1992 | 0.0086  | 0.0365  |   |
| 0.0033 | 1   | .   |                             |        |        |        |         |         |   |



|        |     |     |                             |        |        |        |         |         |   |
|--------|-----|-----|-----------------------------|--------|--------|--------|---------|---------|---|
| 6583   | CZ  | CZ  | . ARG ARG ARG B B 428 428 . | 0.0867 | 0.0656 | 0.0573 | 0.0120  | -0.0035 | - |
| 0.0225 | 1   | .   |                             |        |        |        |         |         |   |
| 6584   | NH1 | NH1 | . ARG ARG ARG B B 428 428 . | 0.0409 | 0.0458 | 0.0253 | -0.0179 | 0.0004  | - |
| 0.0004 | 1   | .   |                             |        |        |        |         |         |   |
| 6585   | NH2 | NH2 | . ARG ARG ARG B B 428 428 . | 0.1218 | 0.0442 | 0.0642 | 0.0062  | -0.0244 | - |
| 0.0262 | 1   | .   |                             |        |        |        |         |         |   |
| 6586   | C   | C   | . ARG ARG ARG B B 428 428 . | 0.1077 | 0.0796 | 0.0766 | 0.0146  | -0.0058 | - |
| 0.0025 | 1   | .   |                             |        |        |        |         |         |   |
| 6587   | O   | O   | . ARG ARG ARG B B 428 428 . | 0.1353 | 0.1383 | 0.1472 | 0.0163  | -0.0071 | - |
| 0.0108 | 1   | .   |                             |        |        |        |         |         |   |
| 6588   | N   | N   | . ASN ASN ASN B B 429 429 . | 0.1134 | 0.0899 | 0.0963 | -0.0076 | -0.0139 | - |
| 0.0226 | 1   | .   |                             |        |        |        |         |         |   |
| 6589   | CA  | CA  | . ASN ASN ASN B B 429 429 . | 0.1171 | 0.1160 | 0.1240 | 0.0018  | -0.0008 | - |
| 0.0010 | 1   | .   |                             |        |        |        |         |         |   |
| 6590   | CB  | CB  | . ASN ASN ASN B B 429 429 . | 0.1591 | 0.1372 | 0.1418 | 0.0054  | -0.0042 | - |
| 0.0098 | 1   | .   |                             |        |        |        |         |         |   |
| 6591   | CG  | CG  | . ASN ASN ASN B B 429 429 . | 0.1420 | 0.1613 | 0.1770 | -0.0122 | 0.0174  | - |
| 0.0045 | 1   | .   |                             |        |        |        |         |         |   |
| 6592   | OD1 | OD1 | . ASN ASN ASN B B 429 429 . | 0.2359 | 0.2473 | 0.2155 | -0.0212 | 0.0162  | - |
| 0.0120 | 1   | .   |                             |        |        |        |         |         |   |
| 6593   | ND2 | ND2 | . ASN ASN ASN B B 429 429 . | 0.2114 | 0.1866 | 0.1518 | -0.0064 | -0.0196 | - |
| 0.0071 | 1   | .   |                             |        |        |        |         |         |   |
| 6594   | C   | C   | . ASN ASN ASN B B 429 429 . | 0.1216 | 0.1088 | 0.1075 | 0.0011  | 0.0000  | - |
| 0.0077 | 1   | .   |                             |        |        |        |         |         |   |
| 6595   | O   | O   | . ASN ASN ASN B B 429 429 . | 0.1313 | 0.1286 | 0.0938 | -0.0158 | -0.0141 | - |
| 0.0050 | 1   | .   |                             |        |        |        |         |         |   |
| 6596   | N   | N   | . PRO PRO PRO B B 430 430 . | 0.1162 | 0.1208 | 0.1102 | -0.0022 | 0.0011  | - |
| 0.0057 | 1   | .   |                             |        |        |        |         |         |   |
| 6597   | CA  | CA  | . PRO PRO PRO B B 430 430 . | 0.1299 | 0.1289 | 0.1244 | 0.0039  | -0.0017 | - |
| 0.0063 | 1   | .   |                             |        |        |        |         |         |   |
| 6598   | CB  | CB  | . PRO PRO PRO B B 430 430 . | 0.1165 | 0.1243 | 0.1053 | -0.0127 | 0.0113  | - |
| 0.0122 | 1   | .   |                             |        |        |        |         |         |   |
| 6599   | CG  | CG  | . PRO PRO PRO B B 430 430 . | 0.1321 | 0.1402 | 0.1234 | 0.0051  | 0.0040  | - |
| 0.0049 | 1   | .   |                             |        |        |        |         |         |   |
| 6600   | CD  | CD  | . PRO PRO PRO B B 430 430 . | 0.1367 | 0.1271 | 0.1259 | -0.0061 | 0.0031  | - |
| 0.0050 | 1   | .   |                             |        |        |        |         |         |   |
| 6601   | C   | C   | . PRO PRO PRO B B 430 430 . | 0.1627 | 0.1585 | 0.1610 | -0.0098 | 0.0046  | - |
| 0.0014 | 1   | .   |                             |        |        |        |         |         |   |
| 6602   | O   | O   | . PRO PRO PRO B B 430 430 . | 0.1841 | 0.1565 | 0.1480 | -0.0073 | 0.0155  | - |
| 0.0003 | 1   | .   |                             |        |        |        |         |         |   |
| 6603   | N   | N   | . SER SER SER B B 431 431 . | 0.2010 | 0.2160 | 0.1990 | -0.0060 | 0.0030  | - |
| 0.0068 | 1   | .   |                             |        |        |        |         |         |   |
| 6604   | CA  | CA  | . SER SER SER B B 431 431 . | 0.2499 | 0.2643 | 0.2603 | -0.0080 | -0.0012 | - |
| 0.0091 | 1   | .   |                             |        |        |        |         |         |   |
| 6605   | CB  | CB  | . SER SER SER B B 431 431 . | 0.2477 | 0.2650 | 0.2511 | -0.0017 | 0.0012  | - |
| 0.0020 | 1   | .   |                             |        |        |        |         |         |   |
| 6606   | OG  | OG  | . SER SER SER B B 431 431 . | 0.2369 | 0.2883 | 0.2697 | -0.0485 | -0.0273 | - |
| 0.0053 | 1   | .   |                             |        |        |        |         |         |   |
| 6607   | C   | C   | . SER SER SER B B 431 431 . | 0.2913 | 0.2947 | 0.2856 | -0.0052 | -0.0027 | - |
| 0.0131 | 1   | .   |                             |        |        |        |         |         |   |
| 6608   | O   | O   | . SER SER SER B B 431 431 . | 0.3015 | 0.3074 | 0.3053 | -0.0191 | -0.0097 | - |
| 0.0183 | 1   | .   |                             |        |        |        |         |         |   |
| 6609   | N   | N   | . VAL VAL VAL B B 432 432 . | 0.2917 | 0.3014 | 0.2970 | -0.0034 | 0.0046  | - |
| 0.0045 | 1   | .   |                             |        |        |        |         |         |   |
| 6610   | CA  | CA  | . VAL VAL VAL B B 432 432 . | 0.3320 | 0.3279 | 0.3269 | 0.0000  | 0.0010  | - |
| 0.0075 | 1   | .   |                             |        |        |        |         |         |   |
| 6611   | CB  | CB  | . VAL VAL VAL B B 432 432 . | 0.3264 | 0.3279 | 0.3224 | 0.0000  | 0.0044  | - |
| 0.0093 | 1   | .   |                             |        |        |        |         |         |   |
| 6612   | CG1 | CG1 | . VAL VAL VAL B B 432 432 . | 0.3428 | 0.3545 | 0.3512 | 0.0128  | 0.0145  | - |
| 0.0048 | 1   | .   |                             |        |        |        |         |         |   |

















































7243 O O . HOH HOH HOH S . 597 597 . 0.7289 0.6752 0.8729 0.0264 -0.0859 -  
0.0979 1 .  
7244 O O . HOH HOH HOH S . 598 598 . 0.1799 0.6981 0.5094 -0.0806 0.0503  
0.2685 1 .  
7245 O O . HOH HOH HOH S . 599 599 . 0.3019 0.5916 0.2652 -0.1429 0.1026  
0.0731 1 .  
7246 O O . HOH HOH HOH S . 600 600 . 0.3162 0.6233 0.3262 -0.0134 -0.0576 -  
0.0170 1 .  
7247 O O . HOH HOH HOH S . 601 601 . 0.3477 0.2945 0.3568 0.0385 0.0725  
0.0373 1 .  
7248 O O . HOH HOH HOH S . 602 602 . 1.0157 0.8449 0.9375 0.4613 0.5454 -  
0.3542 1 .  
7249 O O . HOH HOH HOH S . 603 603 . 0.4477 0.3903 0.3097 -0.0181 0.0669 -  
0.1699 1 .  
7250 O O . HOH HOH HOH S . 605 605 . 0.1835 0.4233 0.3497 -0.0466 -0.0123  
0.0180 1 .  
7251 O O . HOH HOH HOH S . 606 606 . 0.5100 0.2410 0.3777 0.1229 0.0194 -  
0.2360 1 .  
7252 O O . HOH HOH HOH S . 609 609 . 0.5340 0.7088 0.2523 0.0640 0.0933 -  
0.2216 1 .  
7253 O O . HOH HOH HOH S . 610 610 . 0.5323 0.3446 0.3966 -0.1989 0.0234 -  
0.1766 1 .  
7254 O O . HOH HOH HOH S . 613 613 . 0.1893 0.4775 0.5010 0.1633 -0.1297 -  
0.0009 1 .  
7255 O O . HOH HOH HOH S . 615 615 . 0.4095 0.2499 0.3425 -0.0820 0.0043  
0.0265 1 .

```

#
_atom_sites.entry_id          UNNAMED
_atom_sites.fract_transf_matrix[1][1]  0.008712
_atom_sites.fract_transf_matrix[1][2]  0.000000
_atom_sites.fract_transf_matrix[1][3]  0.000000
_atom_sites.fract_transf_matrix[2][1]  0.000000
_atom_sites.fract_transf_matrix[2][2]  0.008356
_atom_sites.fract_transf_matrix[2][3]  0.000000
_atom_sites.fract_transf_matrix[3][1]  0.000000
_atom_sites.fract_transf_matrix[3][2]  0.000000
_atom_sites.fract_transf_matrix[3][3]  0.014706
_atom_sites.fract_transf_vector[1]    0.000000
_atom_sites.fract_transf_vector[2]    0.000000
_atom_sites.fract_transf_vector[3]    0.000000

```

```

#
_cell.length_a      114.785
_cell.length_b      119.677
_cell.length_c       68.001
_cell.angle_alpha   90.000
_cell.angle_beta    90.000
_cell.angle_gamma   90.000
_cell.entry_id      UNNAMED

```

```

#
_computing.entry_id          UNNAMED
_computing.structure_refinement  'REFMAC 5.5.0109'
_computing.structure_solution   ?
_computing.pdbx_data_reduction_ds  HKL
_computing.pdbx_data_reduction_ii  HKL
_computing.cell_refinement       HKL

```

```

#
_data_extraction.software      pdb_extract
_data_extraction.extraction_date 'Fri Oct 21 15:28:23 2011'
_data_extraction.version       3.10
_data_extraction.release_date   'June 10, 2010'

```

```

_data_extraction.location          http://sw-tools.rcsb.org/apps/PDB_EXTRACT/
#
loop_
_database_2.database_id
_database_2.database_code
PDB UNNAMED
RCSB UNNAMED
#
_database_PDB_remark.id          3
_database_PDB_remark.text
;
REMARK 3
REMARK 3 REFINEMENT.
REMARK 3 PROGRAM : REFMAC 5.5.0109
REMARK 3 AUTHORS : MURSHUDOV,VAGIN,DODSON
REMARK 3
REMARK 3 REFINEMENT TARGET : MAXIMUM LIKELIHOOD
REMARK 3
REMARK 3 DATA USED IN REFINEMENT.
REMARK 3 RESOLUTION RANGE HIGH (ANGSTROMS) : 1.50
REMARK 3 RESOLUTION RANGE LOW (ANGSTROMS) : 82.84
REMARK 3 DATA CUTOFF (SIGMA(F)) : NONE
REMARK 3 COMPLETENESS FOR RANGE (%) : 82.89
REMARK 3 NUMBER OF REFLECTIONS : 118194
REMARK 3
REMARK 3 FIT TO DATA USED IN REFINEMENT.
REMARK 3 CROSS-VALIDATION METHOD : THROUGHOUT
REMARK 3 FREE R VALUE TEST SET SELECTION : RANDOM
REMARK 3 R VALUE (WORKING + TEST SET) : 0.22142
REMARK 3 R VALUE (WORKING SET) : 0.21950
REMARK 3 FREE R VALUE : 0.25768
REMARK 3 FREE R VALUE TEST SET SIZE (%) : 5.0
REMARK 3 FREE R VALUE TEST SET COUNT : 6211
REMARK 3
REMARK 3 FIT IN THE HIGHEST RESOLUTION BIN.
REMARK 3 TOTAL NUMBER OF BINS USED : 20
REMARK 3 BIN RESOLUTION RANGE HIGH : 1.500
REMARK 3 BIN RESOLUTION RANGE LOW : 1.539
REMARK 3 REFLECTION IN BIN (WORKING SET) : 3470
REMARK 3 BIN COMPLETENESS (WORKING+TEST) (%) : 33.24
REMARK 3 BIN R VALUE (WORKING SET) : 0.277
REMARK 3 BIN FREE R VALUE SET COUNT : 184
REMARK 3 BIN FREE R VALUE : 0.340
REMARK 3
REMARK 3 NUMBER OF NON-HYDROGEN ATOMS USED IN REFINEMENT.
REMARK 3 ALL ATOMS : 7255
REMARK 3
REMARK 3 B VALUES.
REMARK 3 FROM WILSON PLOT (A**2) : NULL
REMARK 3 MEAN B VALUE (OVERALL, A**2) : 7.585
REMARK 3 OVERALL ANISOTROPIC B VALUE.
REMARK 3 B11 (A**2) : 0.44
REMARK 3 B22 (A**2) : -0.23
REMARK 3 B33 (A**2) : -0.21
REMARK 3 B12 (A**2) : 0.00
REMARK 3 B13 (A**2) : 0.00
REMARK 3 B23 (A**2) : 0.00
REMARK 3
REMARK 3 ESTIMATED OVERALL COORDINATE ERROR.
REMARK 3 ESU BASED ON R VALUE (A) : 0.132

```

REMARK 3 ESU BASED ON FREE R VALUE (A): 0.104  
REMARK 3 ESU BASED ON MAXIMUM LIKELIHOOD (A): 0.064  
REMARK 3 ESU FOR B VALUES BASED ON MAXIMUM LIKELIHOOD (A\*\*2): 3.759  
REMARK 3  
REMARK 3 CORRELATION COEFFICIENTS.  
REMARK 3 CORRELATION COEFFICIENT FO-FC : 0.882  
REMARK 3 CORRELATION COEFFICIENT FO-FC FREE : 0.862  
REMARK 3  
REMARK 3 RMS DEVIATIONS FROM IDEAL VALUES COUNT RMS WEIGHT  
REMARK 3 BOND LENGTHS REFINED ATOMS (A): 6755 ; 0.023 ; 0.022  
REMARK 3 BOND ANGLES REFINED ATOMS (DEGREES): 9136 ; 1.955 ; 1.972  
REMARK 3 TORSION ANGLES, PERIOD 1 (DEGREES): 861 ; 6.020 ; 5.000  
REMARK 3 TORSION ANGLES, PERIOD 2 (DEGREES): 308 ; 40.405 ; 25.000  
REMARK 3 TORSION ANGLES, PERIOD 3 (DEGREES): 1162 ; 15.349 ; 15.000  
REMARK 3 TORSION ANGLES, PERIOD 4 (DEGREES): 40 ; 24.828 ; 15.000  
REMARK 3 CHIRAL-CENTER RESTRAINTS (A\*\*3): 1024 ; 0.136 ; 0.200  
REMARK 3 GENERAL PLANES REFINED ATOMS (A): 5104 ; 0.011 ; 0.021  
REMARK 3  
REMARK 3 ISOTROPIC THERMAL FACTOR RESTRAINTS. COUNT RMS WEIGHT  
REMARK 3 MAIN-CHAIN BOND REFINED ATOMS (A\*\*2): 4277 ; 1.444 ; 1.500  
REMARK 3 MAIN-CHAIN ANGLE REFINED ATOMS (A\*\*2): 6836 ; 2.295 ; 2.000  
REMARK 3 SIDE-CHAIN BOND REFINED ATOMS (A\*\*2): 2478 ; 3.933 ; 3.000  
REMARK 3 SIDE-CHAIN ANGLE REFINED ATOMS (A\*\*2): 2300 ; 5.988 ; 4.500  
REMARK 3  
REMARK 3 ANISOTROPIC THERMAL FACTOR RESTRAINTS. COUNT RMS WEIGHT  
REMARK 3 RIGID-BOND RESTRAINTS (A\*\*2): 6755 ; 2.252 ; 3.000  
REMARK 3  
REMARK 3 NCS RESTRAINTS STATISTICS  
REMARK 3 NUMBER OF NCS GROUPS : NULL  
REMARK 3  
REMARK 3 TWIN DETAILS  
REMARK 3 NUMBER OF TWIN DOMAINS : NULL  
REMARK 3  
REMARK 3  
REMARK 3 TLS DETAILS  
REMARK 3 NUMBER OF TLS GROUPS : NULL  
REMARK 3  
REMARK 3  
REMARK 3 BULK SOLVENT MODELLING.  
REMARK 3 METHOD USED : MASK  
REMARK 3 PARAMETERS FOR MASK CALCULATION  
REMARK 3 VDW PROBE RADIUS : 1.40  
REMARK 3 ION PROBE RADIUS : 0.80  
REMARK 3 SHRINKAGE RADIUS : 0.80  
REMARK 3  
REMARK 3 OTHER REFINEMENT REMARKS:  
REMARK 3 HYDROGENS HAVE BEEN ADDED IN THE RIDING POSITIONS  
REMARK 3 U VALUES : REFINED INDIVIDUALLY  
REMARK 3

```

;
#
_entity_poly.entity_id 1
_entity_poly.pdbx_seq_one_letter_code
;SIQKIWAREILDSRGNPTVEVDLYTAKGLFRAAVPSGASTGIYEALERDGDQRYLGKG
VLKAVDHINSTIAPALISSGLSVVEQEKLNLMLDGTENKSKFGANAILGVSLAVCKA
GAAERELPLYRHIAQLAGNSDLILPVPFNVINGGSHAGNKLAMQEFMILPVGAESFRDA
MRLGAEVYHTLKGVIKDKYGKDATNVGDEGGFAPNILENSEALELVKEAIDKAGYTEKIV
IGMDVAASEFYRDGKYDLDFKSPTDPSRYITGDQLGALYQDFVRDYPVVSIEDPFDQDDW
AAWSKFTANVGIQIVGDDLTVTNPKRIERAVEREAKACNCLLLKVNQIGSVTEAIQACKLAQ
ENGWGVMVSHRSGETEDTFIADLVVGLCTGQIKTGAPCRSERLAKYNQLMRIEELGDEA

```

RFAGHNFRNPSVL

```
;  
_entity_poly.pdbx_strand_id      A,B  
_entity_poly.type                'polypeptide(L)'  
_entity_poly.pdbx_target_identifier ?  
#  
_entry.id      UNNAMED  
#  
_exptl.crystals_number      1  
_exptl.entry_id      UNNAMED  
_exptl.method      'X-RAY DIFFRACTION'  
#  
_exptl_crystal.id      1  
_exptl_crystal.pdbx_mosaicity      0.950  
_exptl_crystal.pdbx_mosaicity_esd  ?  
_exptl_crystal.density_Matthews    ?  
_exptl_crystal.density_diffn       ?  
_exptl_crystal.density_meas        ?  
_exptl_crystal.density_meas_temp   ?  
_exptl_crystal.density_percent_sol ?  
_exptl_crystal.size_max            ?  
_exptl_crystal.size_mid            ?  
_exptl_crystal.size_min            ?  
_exptl_crystal.size_rad            ?  
#  
_refine.entry_id      UNNAMED  
_refine.pdbx_refine_id      'X-RAY DIFFRACTION'  
_refine.ls_d_res_high      1.5000  
_refine.ls_d_res_low      82.8400  
_refine.pdbx_ls_sigma_F    0.000  
_refine.pdbx_data_cutoff_high_absF ?  
_refine.pdbx_data_cutoff_low_absF ?  
_refine.ls_percent_reflms_obs  82.8900  
_refine.ls_number_reflms_obs  124405  
_refine.ls_number_reflms_all  ?  
_refine.pdbx_ls_cross_valid_method THROUGHOUT  
_refine.ls_matrix_type      ?  
_refine.pdbx_R_Free_selection_details RANDOM  
_refine.details  
' HYDROGENS HAVE BEEN ADDED IN THE RIDING POSITIONS U VALUES      : REFINED  
INDIVIDUALLY '  
_refine.ls_R_factor_all      ?  
_refine.ls_R_factor_obs      0.2214  
_refine.ls_R_factor_R_work   0.2195  
_refine.ls_wR_factor_R_work  0.1997  
_refine.ls_R_factor_R_free   0.2577  
_refine.ls_wR_factor_R_free  0.2329  
_refine.ls_percent_reflms_R_free  5.0000  
_refine.ls_number_reflms_R_free  6211  
_refine.ls_number_reflms_R_work  118194  
_refine.ls_R_factor_R_free_error ?  
_refine.B_iso_mean          7.5848  
_refine.solvent_model_param_bsol ?  
_refine.solvent_model_param_ksol ?  
_refine.pdbx_isotropic_thermal_model ?  
_refine.aniso_B[1][1]      0.4400  
_refine.aniso_B[2][2]      -0.2300  
_refine.aniso_B[3][3]      -0.2100  
_refine.aniso_B[1][2]      0.0000  
_refine.aniso_B[1][3]      0.0000
```

|                                                 |                        |
|-------------------------------------------------|------------------------|
| _refine.aniso_B[2][3]                           | 0.0000                 |
| _refine.correlation_coeff_Fo_to_Fc              | 0.8820                 |
| _refine.correlation_coeff_Fo_to_Fc_free         | 0.8620                 |
| _refine.overall_SU_R_Cruickshank_DPI            | 0.1320                 |
| _refine.pdbx_overall_SU_R_free_Cruickshank_DPI  | ?                      |
| _refine.pdbx_overall_SU_R_Blow_DPI              | ?                      |
| _refine.pdbx_overall_SU_R_free_Blow_DPI         | ?                      |
| _refine.overall_SU_R_free                       | 0.1037                 |
| _refine.pdbx_overall_ESU_R                      | 0.1320                 |
| _refine.pdbx_overall_ESU_R_Free                 | 0.1040                 |
| _refine.overall_SU_ML                           | 0.0640                 |
| _refine.overall_SU_B                            | 3.7590                 |
| _refine.solvent_model_details                   | MASK                   |
| _refine.pdbx_solvent_vdw_probe_radii            | 1.4000                 |
| _refine.pdbx_solvent_ion_probe_radii            | 0.8000                 |
| _refine.pdbx_solvent_shrinkage_radii            | 0.8000                 |
| _refine.ls_number_parameters                    | ?                      |
| _refine.ls_number_restraints                    | ?                      |
| _refine.pdbx_starting_model                     | ?                      |
| _refine.pdbx_method_to_determine_struct         | ?                      |
| _refine.pdbx_stereochemistry_target_values      | 'MAXIMUM LIKELIHOOD'   |
| _refine.pdbx_stereochem_target_val_spec_case    | ?                      |
| _refine.overall_FOM_work_R_set                  | 0.8841                 |
| _refine.B_iso_max                               | 244.050                |
| _refine.B_iso_min                               | 2.000                  |
| _refine.pdbx_overall_phase_error                | ?                      |
| _refine.occupancy_max                           | 1.000                  |
| _refine.occupancy_min                           | 0.260                  |
| #                                               |                        |
| loop_                                           |                        |
| _refine_ls_restr.pdbx_refine_id                 |                        |
| _refine_ls_restr.type                           |                        |
| _refine_ls_restr.number                         |                        |
| _refine_ls_restr.dev_ideal                      |                        |
| _refine_ls_restr.dev_ideal_target               |                        |
| _refine_ls_restr.weight                         |                        |
| _refine_ls_restr.pdbx_restraint_function        |                        |
| 'X-RAY DIFFRACTION' r_bond_refined_d            | 6755 0.023 0.022 ? ?   |
| 'X-RAY DIFFRACTION' r_angle_refined_deg         | 9136 1.955 1.972 ? ?   |
| 'X-RAY DIFFRACTION' r_dihedral_angle_1_deg      | 861 6.020 5.000 ? ?    |
| 'X-RAY DIFFRACTION' r_dihedral_angle_2_deg      | 308 40.405 25.000 ? ?  |
| 'X-RAY DIFFRACTION' r_dihedral_angle_3_deg      | 1162 15.349 15.000 ? ? |
| 'X-RAY DIFFRACTION' r_dihedral_angle_4_deg      | 40 24.828 15.000 ? ?   |
| 'X-RAY DIFFRACTION' r_chiral_restr              | 1024 0.136 0.200 ? ?   |
| 'X-RAY DIFFRACTION' r_gen_planes_refined        | 5104 0.011 0.021 ? ?   |
| 'X-RAY DIFFRACTION' r_mcbond_it                 | 4277 1.444 1.500 ? ?   |
| 'X-RAY DIFFRACTION' r_mcbond_angle_it           | 6836 2.295 2.000 ? ?   |
| 'X-RAY DIFFRACTION' r_scbond_it                 | 2478 3.933 3.000 ? ?   |
| 'X-RAY DIFFRACTION' r_scbond_angle_it           | 2300 5.988 4.500 ? ?   |
| 'X-RAY DIFFRACTION' r_rigid_bond_restr          | 6755 2.252 3.000 ? ?   |
| #                                               |                        |
| _refine_ls_shell.d_res_high                     | 1.5000                 |
| _refine_ls_shell.d_res_low                      | 1.5390                 |
| _refine_ls_shell.pdbx_total_number_of_bins_used | 20                     |
| _refine_ls_shell.percent_reflns_obs             | 33.2400                |
| _refine_ls_shell.number_reflns_R_work           | 3470                   |
| _refine_ls_shell.R_factor_all                   | ?                      |
| _refine_ls_shell.R_factor_R_work                | 0.2770                 |
| _refine_ls_shell.R_factor_R_free                | 0.3400                 |
| _refine_ls_shell.percent_reflns_R_free          | ?                      |

```

_refine_ls_shell.number_reflms_R_free      184
_refine_ls_shell.R_factor_R_free_error    ?
_refine_ls_shell.number_reflms_all        3654
_refine_ls_shell.number_reflms_obs        ?
_refine_ls_shell.pdbx_refine_id           'X-RAY DIFFRACTION'

```

```

#
_reflms.entry_id              UNNAMED
_reflms.d_resolution_high     1.500
_reflms.d_resolution_low     50.000
_reflms.pdbx_number_measured_all 685677
_reflms.number_obs           131445
_reflms.pdbx_Rmerge_I_obs    0.084
_reflms.pdbx_netI_over_av_sigmaI 28.180
_reflms.pdbx_netI_over_sigmaI 16.100
_reflms.pdbx_chi_squared     3.407
_reflms.pdbx_redundancy      5.200
_reflms.percent_possible_obs 87.500
_reflms.pdbx_Rmeas_mean      0.084
_reflms.pdbx_average_I_obs   7509.900
_reflms.pdbx_average_sigmaI_obs 266.500

```

```

#
loop_
_reflms_shell.d_res_high
_reflms_shell.d_res_low
_reflms_shell.number_measured_obs
_reflms_shell.number_measured_all
_reflms_shell.number_unique_obs
_reflms_shell.pdbx_rejects
_reflms_shell.Rmerge_I_obs
_reflms_shell.meanI_over_sigI_obs
_reflms_shell.pdbx_Rsym_value
_reflms_shell.pdbx_chi_squared
_reflms_shell.pdbx_redundancy
_reflms_shell.percent_possible_obs
_reflms_shell.pdbx_Rmeas_mean
_reflms_shell.pdbx_netI_over_sigmaI_obs
_reflms_shell.pdbx_number_centric
_reflms_shell.pdbx_number_anomalous
_reflms_shell.pdbx_Rmerge_I_anomalous
_reflms_shell.pdbx_meanI_over_sigI_anomalous
_reflms_shell.pdbx_PCV_mean
_reflms_shell.number_possible
_reflms_shell.number_unique_all
_reflms_shell.Rmerge_F_all
_reflms_shell.Rmerge_F_obs
_reflms_shell.Rmerge_I_all
_reflms_shell.meanI_over_sigI_all
_reflms_shell.percent_possible_all
_reflms_shell.pdbx_Rrim_I_all
_reflms_shell.pdbx_Rpim_I_all
1.500 1.550  ? ? ? ? 0.347 ? ? 1.294 1.600 ? ? ? ? ? ? ? ? ? 6200 ? ? ? ? 41.700 ?
?
1.550 1.620  ? ? ? ? 0.390 ? ? 1.124 2.200 ? ? ? ? ? ? ? ? ? 9528 ? ? ? ? 64.000 ?
?
1.620 1.690  ? ? ? ? 0.376 ? ? 1.186 2.800 ? ? ? ? ? ? ? ? ? 12380 ? ? ? ? 83.400 ?
?
1.690 1.780  ? ? ? ? 0.367 ? ? 1.271 3.700 ? ? ? ? ? ? ? ? ? 13188 ? ? ? ? 88.700 ?
?
1.780 1.890  ? ? ? ? 0.326 ? ? 1.481 4.800 ? ? ? ? ? ? ? ? ? 14463 ? ? ? ? 96.700 ?
?

```



1.890 2.040 ? ? ? ? 0.252 ? ? 1.944 5.900 ? ? ? ? ? ? ? ? ? ? 14878 ? ? ? ? 99.800 ?  
?  
2.040 2.240 ? ? ? ? 0.163 ? ? 2.808 6.300 ? ? ? ? ? ? ? ? ? ? 15001 ? ? ? ? 100.000 ?  
?  
2.240 2.560 ? ? ? ? 0.109 ? ? 3.494 6.600 ? ? ? ? ? ? ? ? ? ? 15044 ? ? ? ? 100.000 ?  
?  
2.560 3.230 ? ? ? ? 0.078 ? ? 4.865 7.100 ? ? ? ? ? ? ? ? ? ? 15161 ? ? ? ? 100.000 ?  
?  
3.230 50.000 ? ? ? ? 0.047 ? ? 6.299 7.200 ? ? ? ? ? ? ? ? ? ? 15602 ? ? ? ? 99.900 ?  
?

```
#
loop_
_software.pdbx_ordinal
_software.name
_software.version
_software.date
_software.type
_software.contact_author
_software.contact_author_email
_software.classification
_software.location
_software.language
1 HKL      ?      ?      package 'Zbyszek Otwinowski' hkl@hkl-xray.com
'data reduction' http://www.hkl-xray.com/      ?
2 REFMAC5  ?      ?      program 'Garib N. Murshudov' garib@ysbl.york.ac.uk
refinement      http://www.ccp4.ac.uk/dist/html/refmac5.html Fortran_77
3 pdb_extract 3.10 'June 10, 2010' package PDB
deposit@deposit.rcsb.org
'data extraction' http://sw-tools.pdb.org/apps/PDB_EXTRACT/      C++
#
_struct_biol.id      1
_struct_biol.details ?
#
_symmetry.space_group_name_H-M 'P 21 21 2'
_symmetry.entry_id    UNNAMED
_symmetry.Int_Tables_number 18
#
```

## wwPDB Validation Report

**TITLE:** Asymmetric complex of human neuron specific enolase-5-PGA/PEP  
**AUTHOR(S):** J Qin, G Chai, J Brewer, L Lovelace, L Lebioda

### Summary of PDB Entry Validation

The results of the validation of this PDB entry are shown below. No major issues were found.

### Sequence Validation

The reported biological sequence and the sequence given in the coordinates show no discrepancy.

### Summary of Structure Factor Validation

| Structure quality                                                                       |        |
|-----------------------------------------------------------------------------------------|--------|
| Average Real space R-factor (Deviation) (Calculated by SFCHECK, V7.02.4)                | 0.0627 |
| Average Real space R-factor (Deviation) (Calculated by MAPMAN, V7.8.5)                  | 0.0788 |
| Average Real-space correlation coefficient (Deviation) (Calculated by SFCHECK, V7.02.4) | 0.9925 |
| Average Real-space correlation coefficient (Deviation) (Calculated by MAPMAN, V7.8.5)   | 0.889  |
| Average Occupancy-weighted avg temperature factor (Deviation)                           | 8.31   |

| Resolution                                        |        |
|---------------------------------------------------|--------|
| High Resolution (Author reported)                 | 1.40   |
| High Resolution (Calculated by SFCHECK, V7.02.4)  | 1.40   |
| High Resolution (Calculated by REFMAC, V5.5.0109) | 1.400  |
| Low Resolution (Author reported)                  | 81.25  |
| Low Resolution (Calculated by SFCHECK, V7.02.4)   | 41.67  |
| Low Resolution (Calculated by REFMAC, V5.5.0109)  | 41.674 |

| Crystal data |  |
|--------------|--|
|              |  |

|                             |           |
|-----------------------------|-----------|
| Space group                 | P 21 21 2 |
| Total number of reflections | 138298    |
| Number of reflections used  | 131411    |
| Completeness of data        | 77.7      |

| <b>R-factors</b>                                |        |
|-------------------------------------------------|--------|
| R-factor (Author reported)                      | 0.215  |
| R-factor (Calculated by SFCHECK, V7.02.4)       | 0.243  |
| R-factor (Calculated by REFMAC, V5.5.0109)      | 0.2153 |
| Free R-factor (Author reported)                 | 0.261  |
| Free R-factor (Calculated by SFCHECK, V7.02.4)  | 0.276  |
| Free R-factor (Calculated by REFMAC, V5.5.0109) | 0.2609 |

| <b>Wilson statistics (PHENIX, V1.6-289)</b> |      |
|---------------------------------------------|------|
| Wilson B-factor                             | 5.00 |
| Wilson Scale                                | 0.51 |

| <b>Padilla-Yeates statistics for twin detection (PHENIX, V1.6-289)</b> |       |
|------------------------------------------------------------------------|-------|
| Padilla-Yeates $\langle  L  \rangle$                                   | 0.282 |
| Padilla-Yeates $\langle L^*L \rangle$                                  | 0.119 |

## wwPDB Validation Report

**TITLE:** Asymmetric complex of human neuron specific enolase-6-PGA/PEP  
**AUTHOR(S):** J Qin, G Chai, J Brewer, L Lovelace, L Lebioda

### Summary of PDB Entry Validation

The results of the validation of this PDB entry are shown below. No major issues were found.

### Sequence Validation

The reported biological sequence and the sequence given in the coordinates show no discrepancy.

### Summary of Structure Factor Validation

| Structure quality                                                                       |        |
|-----------------------------------------------------------------------------------------|--------|
| Average Real space R-factor (Deviation) (Calculated by SFCHECK, V7.02.4)                | 0.0545 |
| Average Real space R-factor (Deviation) (Calculated by MAPMAN, V7.8.5)                  | 0.0746 |
| Average Real-space correlation coefficient (Deviation) (Calculated by SFCHECK, V7.02.4) | 0.9921 |
| Average Real-space correlation coefficient (Deviation) (Calculated by MAPMAN, V7.8.5)   | 0.975  |
| Average Occupancy-weighted avg temperature factor (Deviation)                           | 22.04  |

| Resolution                                        |        |
|---------------------------------------------------|--------|
| High Resolution (Author reported)                 | 1.42   |
| High Resolution (Calculated by SFCHECK, V7.02.4)  | 1.41   |
| High Resolution (Calculated by REFMAC, V5.5.0109) | 1.416  |
| Low Resolution (Author reported)                  | 82.76  |
| Low Resolution (Calculated by SFCHECK, V7.02.4)   | 43.84  |
| Low Resolution (Calculated by REFMAC, V5.5.0109)  | 43.842 |

| Crystal data |  |
|--------------|--|
|              |  |

|                             |           |
|-----------------------------|-----------|
| Space group                 | P 21 21 2 |
| Total number of reflections | 166990    |
| Number of reflections used  | 158604    |
| Completeness of data        | 93.7      |

| <b>R-factors</b>                                |        |
|-------------------------------------------------|--------|
| R-factor (Author reported)                      | 0.156  |
| R-factor (Calculated by SFCHECK, V7.02.4)       | 0.194  |
| R-factor (Calculated by REFMAC, V5.5.0109)      | 0.1565 |
| Free R-factor (Author reported)                 | 0.199  |
| Free R-factor (Calculated by SFCHECK, V7.02.4)  | 0.220  |
| Free R-factor (Calculated by REFMAC, V5.5.0109) | 0.1991 |

| <b>Wilson statistics (PHENIX, V1.6-289)</b> |       |
|---------------------------------------------|-------|
| Wilson B-factor                             | 17.96 |
| Wilson Scale                                | 0.49  |

| <b>Padilla-Yeates statistics for twin detection (PHENIX, V1.6-289)</b> |       |
|------------------------------------------------------------------------|-------|
| Padilla-Yeates $\langle  L  \rangle$                                   | 0.467 |
| Padilla-Yeates $\langle L^*L \rangle$                                  | 0.295 |

10/27/11 04:48 PM (EDT)

Generated by RCSB PDB

Summary Report for Review

## wwPDB Validation Report

**TITLE:** Asymmetric complex of human neuron specific enolase-4-PGA/PEP  
**AUTHOR(S):** J Qin, G Chai, J Brewer, L Lovelace, L Lebioda

### Summary of PDB Entry Validation

The results of the validation of this PDB entry are shown below. No major issues were found.

### Sequence Validation

The reported biological sequence and the sequence given in the coordinates show no discrepancy.

### Summary of Structure Factor Validation

| Structure quality                                                                       |        |
|-----------------------------------------------------------------------------------------|--------|
| Average Real space R-factor (Deviation) (Calculated by SFCHECK, V7.02.4)                | 0.0951 |
| Average Real-space correlation coefficient (Deviation) (Calculated by SFCHECK, V7.02.4) | 0.9749 |
| Average Occupancy-weighted avg temperature factor (Deviation)                           | 35.39  |

| Resolution                                       |       |
|--------------------------------------------------|-------|
| High Resolution (Author reported)                | 2.10  |
| High Resolution (Calculated by SFCHECK, V7.02.4) | 2.10  |
| Low Resolution (Author reported)                 | 80.72 |
| Low Resolution (Calculated by SFCHECK, V7.02.4)  | 37.39 |

| Crystal data                |           |
|-----------------------------|-----------|
| Space group                 | P 21 21 2 |
| Total number of reflections | 47009     |
| Number of reflections used  | 44629     |
| Completeness of data        | 89.1      |

| <b>R-factors</b>                               |       |
|------------------------------------------------|-------|
| R-factor (Author reported)                     | 0.190 |
| R-factor (Calculated by SFCHECK, V7.02.4)      | 0.239 |
| Free R-factor (Author reported)                | 0.250 |
| Free R-factor (Calculated by SFCHECK, V7.02.4) | 0.284 |

| <b>Wilson statistics (PHENIX, V1.6-289)</b> |       |
|---------------------------------------------|-------|
| Wilson B-factor                             | 31.88 |
| Wilson Scale                                | 0.50  |

| <b>Padilla-Yeates statistics for twin detection (PHENIX, V1.6-289)</b> |       |
|------------------------------------------------------------------------|-------|
| Padilla-Yeates $\langle  L  \rangle$                                   | 0.485 |
| Padilla-Yeates $\langle L^*L \rangle$                                  | 0.318 |

## wwPDB Validation Report

**TITLE:** Asymmetric complex of human neuron specific enolase-3-PGA/PEP  
**AUTHOR(S):** J Qin, G Chai, J Brewer, L Lovelace, L Lebioda

### Summary of PDB Entry Validation

The results of the validation of this PDB entry are shown below. No major issues were found.

### Sequence Validation

The reported biological sequence and the sequence given in the coordinates show no discrepancy.

### Summary of Structure Factor Validation

| Structure quality                                                                       |        |
|-----------------------------------------------------------------------------------------|--------|
| Average Real space R-factor (Deviation) (Calculated by SFCHECK, V7.02.4)                | 0.0485 |
| Average Real space R-factor (Deviation) (Calculated by MAPMAN, V7.8.5)                  | 0.0725 |
| Average Real-space correlation coefficient (Deviation) (Calculated by SFCHECK, V7.02.4) | 0.9938 |
| Average Real-space correlation coefficient (Deviation) (Calculated by MAPMAN, V7.8.5)   | 0.965  |
| Average Occupancy-weighted avg temperature factor (Deviation)                           | 15.09  |

| Resolution                                        |        |
|---------------------------------------------------|--------|
| High Resolution (Author reported)                 | 1.55   |
| High Resolution (Calculated by SFCHECK, V7.02.4)  | 1.55   |
| High Resolution (Calculated by REFMAC, V5.5.0109) | 1.554  |
| Low Resolution (Author reported)                  | 80.84  |
| Low Resolution (Calculated by SFCHECK, V7.02.4)   | 42.68  |
| Low Resolution (Calculated by REFMAC, V5.5.0109)  | 42.679 |

| Crystal data |  |
|--------------|--|
|              |  |



|                             |           |
|-----------------------------|-----------|
| Space group                 | P 21 21 2 |
| Total number of reflections | 112548    |
| Number of reflections used  | 106884    |
| Completeness of data        | 87.1      |

| <b>R-factors</b>                                |        |
|-------------------------------------------------|--------|
| R-factor (Author reported)                      | 0.143  |
| R-factor (Calculated by SFCHECK, V7.02.4)       | 0.181  |
| R-factor (Calculated by REFMAC, V5.5.0109)      | 0.1440 |
| Free R-factor (Author reported)                 | 0.189  |
| Free R-factor (Calculated by SFCHECK, V7.02.4)  | 0.205  |
| Free R-factor (Calculated by REFMAC, V5.5.0109) | 0.1901 |

| <b>Wilson statistics (PHENIX, V1.6-289)</b> |       |
|---------------------------------------------|-------|
| Wilson B-factor                             | 13.05 |
| Wilson Scale                                | 0.52  |

| <b>Padilla-Yeates statistics for twin detection (PHENIX, V1.6-289)</b> |       |
|------------------------------------------------------------------------|-------|
| Padilla-Yeates $\langle  L  \rangle$                                   | 0.465 |
| Padilla-Yeates $\langle L^*L \rangle$                                  | 0.294 |

## wwPDB Validation Report

**TITLE:** Asymmetric complex of human neuron specific enolase-2-PGA/PEP  
**AUTHOR(S):** J Qin, G Chai, J Brewer, L Lovelace, L Lebioda

### Summary of PDB Entry Validation

The results of the validation of this PDB entry are shown below. No major issues were found.

### Sequence Validation

The reported biological sequence and the sequence given in the coordinates show no discrepancy.

### Summary of Structure Factor Validation

| Structure quality                                                                       |        |
|-----------------------------------------------------------------------------------------|--------|
| Average Real space R-factor (Deviation) (Calculated by SFCHECK, V7.02.4)                | 0.0503 |
| Average Real space R-factor (Deviation) (Calculated by MAPMAN, V7.8.5)                  | 0.0735 |
| Average Real-space correlation coefficient (Deviation) (Calculated by SFCHECK, V7.02.4) | 0.9933 |
| Average Real-space correlation coefficient (Deviation) (Calculated by MAPMAN, V7.8.5)   | 0.964  |
| Average Occupancy-weighted avg temperature factor (Deviation)                           | 13.18  |

| Resolution                                        |        |
|---------------------------------------------------|--------|
| High Resolution (Author reported)                 | 1.41   |
| High Resolution (Calculated by SFCHECK, V7.02.4)  | 1.41   |
| High Resolution (Calculated by REFMAC, V5.5.0109) | 1.414  |
| Low Resolution (Author reported)                  | 44.58  |
| Low Resolution (Calculated by SFCHECK, V7.02.4)   | 41.08  |
| Low Resolution (Calculated by REFMAC, V5.5.0109)  | 41.075 |

| Crystal data |  |
|--------------|--|
|              |  |

|                             |           |
|-----------------------------|-----------|
| Space group                 | P 21 21 2 |
| Total number of reflections | 152702    |
| Number of reflections used  | 145026    |
| Completeness of data        | 94.1      |

| <b>R-factors</b>                                |        |
|-------------------------------------------------|--------|
| R-factor (Author reported)                      | 0.161  |
| R-factor (Calculated by SFCHECK, V7.02.4)       | 0.190  |
| R-factor (Calculated by REFMAC, V5.5.0109)      | 0.1615 |
| Free R-factor (Author reported)                 | 0.198  |
| Free R-factor (Calculated by SFCHECK, V7.02.4)  | 0.213  |
| Free R-factor (Calculated by REFMAC, V5.5.0109) | 0.1976 |

| <b>Wilson statistics (PHENIX, V1.6-289)</b> |       |
|---------------------------------------------|-------|
| Wilson B-factor                             | 11.40 |
| Wilson Scale                                | 0.55  |

| <b>Padilla-Yeates statistics for twin detection (PHENIX, V1.6-289)</b> |       |
|------------------------------------------------------------------------|-------|
| Padilla-Yeates $\langle  L  \rangle$                                   | 0.485 |
| Padilla-Yeates $\langle L^*L \rangle$                                  | 0.316 |

## wwPDB Validation Report

**TITLE:** Asymmetric complex of human neuron specific enolase-1-PGA/PEP  
**AUTHOR(S):** J Qin, G Chai, J Brewer, L Lovelace, L Lebioda

### Summary of PDB Entry Validation

The results of the validation of this PDB entry are shown below. No major issues were found.

### Sequence Validation

The reported biological sequence and the sequence given in the coordinates show no discrepancy.

### Summary of Structure Factor Validation

| Structure quality                                                                       |        |
|-----------------------------------------------------------------------------------------|--------|
| Average Real space R-factor (Deviation) (Calculated by SFCHECK, V7.02.4)                | 0.0675 |
| Average Real space R-factor (Deviation) (Calculated by MAPMAN, V7.8.5)                  | 0.0834 |
| Average Real-space correlation coefficient (Deviation) (Calculated by SFCHECK, V7.02.4) | 0.9912 |
| Average Real-space correlation coefficient (Deviation) (Calculated by MAPMAN, V7.8.5)   | 0.883  |
| Average Occupancy-weighted avg temperature factor (Deviation)                           | 7.58   |

| Resolution                                        |        |
|---------------------------------------------------|--------|
| High Resolution (Author reported)                 | 1.50   |
| High Resolution (Calculated by SFCHECK, V7.02.4)  | 1.50   |
| High Resolution (Calculated by REFMAC, V5.5.0109) | 1.500  |
| Low Resolution (Author reported)                  | 82.84  |
| Low Resolution (Calculated by SFCHECK, V7.02.4)   | 36.44  |
| Low Resolution (Calculated by REFMAC, V5.5.0109)  | 36.444 |

| Crystal data |  |
|--------------|--|
|              |  |

|                             |           |
|-----------------------------|-----------|
| Space group                 | P 21 21 2 |
| Total number of reflections | 124405    |
| Number of reflections used  | 118194    |
| Completeness of data        | 82.9      |

| <b>R-factors</b>                                |        |
|-------------------------------------------------|--------|
| R-factor (Author reported)                      | 0.220  |
| R-factor (Calculated by SFCHECK, V7.02.4)       | 0.244  |
| R-factor (Calculated by REFMAC, V5.5.0109)      | 0.2197 |
| Free R-factor (Author reported)                 | 0.258  |
| Free R-factor (Calculated by SFCHECK, V7.02.4)  | 0.271  |
| Free R-factor (Calculated by REFMAC, V5.5.0109) | 0.2578 |

| <b>Wilson statistics (PHENIX, V1.6-289)</b> |      |
|---------------------------------------------|------|
| Wilson B-factor                             | 3.44 |
| Wilson Scale                                | 0.52 |

| <b>Padilla-Yeates statistics for twin detection (PHENIX, V1.6-289)</b> |       |
|------------------------------------------------------------------------|-------|
| Padilla-Yeates $\langle  L  \rangle$                                   | 0.286 |
| Padilla-Yeates $\langle L^*L \rangle$                                  | 0.122 |
